# Supplementary material for: Iterative Variable Gene Discovery from Whole Genome Sequencing with a Bootstrapped Multiresolution Algorithm
Source: Comput Math Methods Med. 2019 Feb 11;2019:3780245. doi: 10.1155/2019/3780245 (PMC6388353; doi:10.1155/2019/3780245)
Supplement: Supplementary Materials — supp_materialsV2.pdf: this is an updated document, which includes new figures requested by the reviewer. sequences_alignments.zip: these are genome sequence files that are relevant for reproducing some of the results. [file 3780245.f1.zip]

Archive with 30 entries (29 files):
- 3780245.f1/sequences_alignments/
- 3780245.f1/sequences_alignments/all_init.dnd
- 3780245.f1/sequences_alignments/all_init.fasta
- 3780245.f1/sequences_alignments/all_init.nwk
- 3780245.f1/sequences_alignments/bstrp_iteration_0.fasta
- 3780245.f1/sequences_alignments/bstrp_iteration_0_r.dnd
- 3780245.f1/sequences_alignments/bstrp_iteration_0_r.fasta
- 3780245.f1/sequences_alignments/bstrp_iteration_0_r.nwk
- 3780245.f1/sequences_alignments/bstrp_iteration_1.fasta
- 3780245.f1/sequences_alignments/bstrp_iteration_1_r.dnd
- 3780245.f1/sequences_alignments/bstrp_iteration_1_r.fasta
- 3780245.f1/sequences_alignments/bstrp_iteration_1_r.nwk
- 3780245.f1/sequences_alignments/bstrp_iteration_2.fasta
- 3780245.f1/sequences_alignments/bstrp_iteration_2_r.dnd
- 3780245.f1/sequences_alignments/bstrp_iteration_2_r.fasta
- 3780245.f1/sequences_alignments/bstrp_iteration_2_r.nwk
- 3780245.f1/sequences_alignments/bstrp_iteration_3.fasta
- 3780245.f1/sequences_alignments/bstrp_iteration_3_r.dnd
- 3780245.f1/sequences_alignments/bstrp_iteration_3_r.fasta
- 3780245.f1/sequences_alignments/bstrp_iteration_3_r.nwk
- 3780245.f1/sequences_alignments/trav_0.dnd
- 3780245.f1/sequences_alignments/trav_0.fasta
- 3780245.f1/sequences_alignments/trav_0.nwk
- 3780245.f1/sequences_alignments/trav_2.dnd
- 3780245.f1/sequences_alignments/trav_2.fasta
- 3780245.f1/sequences_alignments/trav_2.nwk
- 3780245.f1/sequences_alignments/trav_3.dnd
- 3780245.f1/sequences_alignments/trav_3.fasta
- 3780245.f1/sequences_alignments/trav_3.nwk
- 3780245.f1/supp_materialV2.pdf
