# Supplementary material for: Iterative Variable Gene Discovery from Whole Genome Sequencing with a Bootstrapped Multiresolution Algorithm
Source: Comput Math Methods Med. 2019 Feb 11;2019:3780245. doi: 10.1155/2019/3780245 (PMC6388353; doi:10.1155/2019/3780245)
Supplement: Supplementary Materials — supp_materialsV2.pdf: this is an updated document, which includes new figures requested by the reviewer. sequences_alignments.zip: these are genome sequence files that are relevant for reproducing some of the results. [file 3780245.f1.zip › 3780245.f1/sequences_alignments/all_init.dnd]

(
(
(
(
(
Vs426-Homo_sapiens-ABBA01050775.1-ighv:0.04
,
Vs350-Homo_sapiens-ABBA01040615.1-ighv:0.04
):0.177721
,
(
(
Vs773-Mus_m2-120129022-ighv:0.0775
,
(
Vs785-Mus_m2-120129022-ighv:0.0525
,
(
Vs783-Mus_m2-120129022-ighv:0.035
,
Vs782-Mus_m2-120129022-ighv:0.035
):0.0175
):0.025
):0.12011
,
(
(
Vs1150-Homo_sapiens-ABBA01074089.1-ighv:0.0742574
,
Vs338-Homo_sapiens-ABBA01040607.1-ighv:0.0742574
):0.108171
,
(
(
Vs658-Homo_sapiens-ABBA01000438.1-ighv:0.0643564
,
Vs1155-Homo_sapiens-ABBA01074094.1-ighv:0.0643564
):0.0855169
,
(
Vs348-Homo_sapiens-ABBA01040614.1-ighv:0.112933
,
(
Vs355-Homo_sapiens-ABBA01040616.1-ighv:0.109878
,
(
(
Vs16-Homo_sapiens-ABBA01000440.1-ighv:0.00495049
,
Vs343-Homo_sapiens-ABBA01040608.1-ighv:0.00495049
):0.101408
,
(
Vs1146-Homo_sapiens-ABBA01074086.1-ighv:0.0931312
,
(
Vs1207-Homo_sapiens-ABBA01134518.1-ighv:0.106436
,
(
Vs1160-Homo_sapiens-ABBA01074094.1-ighv:0.0773515
,
(
Vs1151-Homo_sapiens-ABBA01074091.1-ighv:0.0655941
,
(
Vs354-Homo_sapiens-ABBA01040616.1-ighv:0.0569307
,
(
Vs96-Homo_sapiens-ABBA01015827.1-ighv:0.039604
,
Vs1147-Homo_sapiens-ABBA01074086.1-ighv:0.039604
):0.0173267
):0.00866337
):0.0117574
):0.0290842
):-0.0133045
):0.0132271
):0.00351949
):0.00305539
):0.0369402
):0.0325553
):0.0151812
):0.0201111
):0.0469828
,
(
Vs759-Mus_m2-120129022-ighv:0.223858
,
(
(
Vs787-Mus_m2-120129022-ighv:0.0475
,
(
Vs789-Mus_m2-120129022-ighv:0.0375
,
(
Vs780-Mus_m2-120129022-ighv:0.025
,
Vs793-Mus_m2-120129022-ighv:0.025
):0.0125
):0.01
):0.136883
,
(
Vs739-Mus_m2-120129022-ighv:0.19076
,
(
Vs757-Mus_m2-120129022-ighv:0.179229
,
(
(
Vs720-Mus_m2-120129022-ighv:0.10916
,
(
(
Vs743-Mus_m2-120129022-ighv:0.025
,
Vs742-Mus_m2-120129022-ighv:0.025
):0.0457422
,
(
Vs744-Mus_m2-120129022-ighv:0.0788281
,
(
(
Vs745-Mus_m2-120129022-ighv:0.02
,
Vs751-Mus_m2-120129022-ighv:0.02
):0.0530469
,
(
Vs748-Mus_m2-120129022-ighv:0.069375
,
(
Vs746-Mus_m2-120129022-ighv:0.055
,
(
(
Vs747-Mus_m2-120129022-ighv:0.025
,
Vs750-Mus_m2-120129022-ighv:0.025
):0.013125
,
(
Vs752-Mus_m2-120129022-ighv:0.0425
,
(
Vs749-Mus_m2-120129022-ighv:0.025
,
Vs753-Mus_m2-120129022-ighv:0.025
):0.0175
):-0.004375
):0.016875
):0.014375
):0.00367188
):0.00578125
):-0.00808594
):0.038418
):0.035175
,
(
Vs741-Mus_m2-120129022-ighv:0.157117
,
(
Vs762-Mus_m2-120129022-ighv:0.123482
,
(
(
Vs729-Mus_m2-120129022-ighv:0.0938281
,
(
Vs755-Mus_m2-120129022-ighv:0.0986914
,
(
Vs756-Mus_m2-120129022-ighv:0.107832
,
(
Vs758-Mus_m2-120129022-ighv:0.10293
,
(
(
Vs708-Mus_m2-120129022-ighv:0.02
,
Vs710-Mus_m2-120129022-ighv:0.02
):0.0682812
,
(
(
Vs763-Mus_m2-120129022-ighv:0.02
,
Vs760-Mus_m2-120129022-ighv:0.02
):0.0464844
,
(
(
Vs732-Mus_m2-120129022-ighv:0.04875
,
(
Vs716-Mus_m2-120129022-ighv:0.035
,
(
Vs735-Mus_m2-120129022-ighv:0.03
,
Vs723-Mus_m2-120129022-ighv:0.03
):0.005
):0.01375
):0.014375
,
(
(
Vs736-Mus_m2-120129022-ighv:0.015
,
Vs727-Mus_m2-120129022-ighv:0.015
):0.0278125
,
(
Vs715-Mus_m2-120129022-ighv:0.0325
,
(
Vs728-Mus_m2-120129022-ighv:0.0225
,
(
Vs737-Mus_m2-120129022-ighv:0.02
,
Vs719-Mus_m2-120129022-ighv:0.02
):0.0025
):0.01
):0.0103125
):0.0203125
):0.00335938
):0.0217969
):0.0146484
):0.00490234
):-0.00914063
):-0.00486328
):0.0225624
,
(
Vs754-Mus_m2-120129022-ighv:0.129316
,
(
(
Vs731-Mus_m2-120129022-ighv:0.05
,
Vs726-Mus_m2-120129022-ighv:0.05
):0.0601563
,
(
(
Vs717-Mus_m2-120129022-ighv:0
,
Vs725-Mus_m2-120129022-ighv:0
):0.0906348
,
(
Vs711-Mus_m2-120129022-ighv:0.0958594
,
(
Vs709-Mus_m2-120129022-ighv:0.0883984
,
(
Vs724-Mus_m2-120129022-ighv:0.0815625
,
(
Vs733-Mus_m2-120129022-ighv:0.0807813
,
(
Vs706-Mus_m2-120129022-ighv:0.0734375
,
(
Vs713-Mus_m2-120129022-ighv:0.055
,
(
Vs721-Mus_m2-120129022-ighv:0.0475
,
(
Vs712-Mus_m2-120129022-ighv:0.0375
,
(
Vs707-Mus_m2-120129022-ighv:0.03
,
Vs714-Mus_m2-120129022-ighv:0.03
):0.0075
):0.01
):0.0075
):0.0184375
):0.00734375
):0.000781246
):0.00683594
):0.00746093
):-0.0052246
):0.0195215
):0.0191602
):-0.0129259
):0.00709154
):0.0336349
):-0.0127819
):0.0348939
):0.0115309
):-0.00637668
):0.0394747
):0.0408459
):0.616718
,
(
(
(
(
(
Vs1165-Homo_sapiens-ABBA01074095.1-ighv:0.0582524
,
Vs707-Homo_sapiens-ABBA01009461.1-ighv:0.0582524
):0.026699
,
(
(
Vs15-Homo_sapiens-ABBA01000439.1-ighv:0.0194175
,
Vs342-Homo_sapiens-ABBA01040608.1-ighv:0.0194175
):0.0436893
,
Vs1153-Homo_sapiens-ABBA01074091.1-ighv:0.0631068
):0.0218447
):0.088213
,
(
Vs740-Mus_m2-120129022-ighv:0.128034
,
(
Vs722-Mus_m2-120129022-ighv:0.0667476
,
(
(
Vs738-Mus_m2-120129022-ighv:0.0436893
,
Vs730-Mus_m2-120129022-ighv:0.0436893
):0.0121359
,
(
Vs734-Mus_m2-120129022-ighv:0.0436893
,
Vs718-Mus_m2-120129022-ighv:0.0436893
):0.0121359
):0.0109223
):0.0612864
):0.0451305
):0.0684339
,
(
(
Vs800-Mus_m2-120129022-ighv:0.138018
,
(
(
(
Vs809-Mus_m2-120129022-ighv:0.01
,
Vs813-Mus_m2-120129022-ighv:0.01
):0.01
,
Vs807-Mus_m2-120129022-ighv:0.02
):0.0562918
,
(
Vs802-Mus_m2-120129022-ighv:0.050303
,
(
Vs805-Mus_m2-120129022-ighv:0.0366162
,
(
Vs811-Mus_m2-120129022-ighv:0.0376515
,
(
Vs801-Mus_m2-120129022-ighv:0.020202
,
Vs796-Mus_m2-120129022-ighv:0.020202
):0.0174495
):-0.00103536
):0.0136869
):0.0259888
):0.0617259
):0.104264
,
(
(
Vs776-Mus_m2-120129022-ighv:0.158845
,
(
Vs770-Mus_m2-120129022-ighv:0.160331
,
(
Vs779-Mus_m2-120129022-ighv:0.132092
,
(
Vs777-Mus_m2-120129022-ighv:0.115668
,
(
Vs772-Mus_m2-120129022-ighv:0.085
,
(
Vs774-Mus_m2-120129022-ighv:0.049505
,
Vs791-Mus_m2-120129022-ighv:0.049505
):0.0354951
):0.0306683
):0.0164233
):0.0282389
):-0.00148514
):0.0559241
,
(
Vs784-Mus_m2-120129022-ighv:0.227842
,
(
Vs1148-Homo_sapiens-ABBA01074086.1-ighv:0.194044
,
(
Vs1170-Homo_sapiens-ABBA01074102.1-ighv:0.0828125
,
(
(
(
Vs31-Homo_sapiens-ABBA01004293.1-ighv:0
,
Vs117-Homo_sapiens-ABBA01017836.1-ighv:0
):0.0148515
,
Vs1149-Homo_sapiens-ABBA01074088.1-ighv:0.0148515
):0.0461587
,
(
(
Vs1168-Homo_sapiens-ABBA01074100.1-ighv:0.0543358
,
(
Vs1171-Homo_sapiens-ABBA01074103.1-ighv:0.0452351
,
(
Vs630-Homo_sapiens-ABBA01098847.1-ighv:0.031875
,
(
Vs347-Homo_sapiens-ABBA01040614.1-ighv:0.02375
,
(
Vs346-Homo_sapiens-ABBA01040614.1-ighv:0.0220588
,
(
(
Vs625-Homo_sapiens-ABBA01078092.1-ighv:0
,
Vs654-Homo_sapiens-ABBA01210258.1-ighv:0
):0.00980392
,
Vs1166-Homo_sapiens-ABBA01074096.1-ighv:0.00980392
):0.0122549
):0.00169118
):0.008125
):0.0133602
):0.00910066
):0.00603084
,
(
Vs1164-Homo_sapiens-ABBA01074095.1-ighv:0.039604
,
Vs775-Homo_sapiens-ABBA01018841.1-ighv:0.039604
):0.0207627
):0.000643563
):0.0218023
):0.111232
):0.0337971
):-0.0130721
):0.0275124
):-0.000683516
):0.5148
,
(
(
(
Vs771-Mus_m2-120129022-ighv:0.178002
,
(
Vs775-Mus_m2-120129022-ighv:0.168811
,
(
Vs765-Mus_m2-120129022-ighv:0.120711
,
(
Vs768-Mus_m2-120129022-ighv:0.0931373
,
(
Vs767-Mus_m2-120129022-ighv:0.0686275
,
(
Vs769-Mus_m2-120129022-ighv:0.0539216
,
Vs766-Mus_m2-120129022-ighv:0.0539216
):0.0147059
):0.0245098
):0.0275735
):0.0481005
):0.00919117
):0.00382751
,
(
(
Vs795-Mus_m2-120129022-ighv:0.109375
,
(
Vs794-Mus_m2-120129022-ighv:0.0745192
,
(
Vs781-Mus_m2-120129022-ighv:0.0576923
,
Vs778-Mus_m2-120129022-ighv:0.0576923
):0.0168269
):0.0348558
):0.0489571
,
(
(
Vs761-Mus_m2-120129022-ighv:0.0196078
,
Vs764-Mus_m2-120129022-ighv:0.0196078
):0.106986
,
(
Vs351-Homo_sapiens-ABBA01040616.1-ighv:0.0875928
,
(
Vs1161-Homo_sapiens-ABBA01074094.1-ighv:0.0853322
,
(
Vs340-Homo_sapiens-ABBA01040607.1-ighv:0.0735294
,
(
Vs35-Homo_sapiens-ABBA01004577.1-ighv:0.0485437
,
Vs341-Homo_sapiens-ABBA01040607.1-ighv:0.0485437
):0.0249857
):0.0118028
):0.00226061
):0.0390015
):0.0317378
):0.0234978
):0.0372228
,
(
(
Vs814-Mus_m2-120129022-ighv:0.162559
,
(
Vs798-Mus_m2-120129022-ighv:0.127153
,
(
(
Vs803-Mus_m2-120129022-ighv:0.0764078
,
(
Vs804-Mus_m2-120129022-ighv:0.0699196
,
(
Vs806-Mus_m2-120129022-ighv:0.06125
,
(
Vs808-Mus_m2-120129022-ighv:0.0475
,
(
Vs810-Mus_m2-120129022-ighv:0.035
,
Vs812-Mus_m2-120129022-ighv:0.035
):0.0125
):0.01375
):0.00866956
):0.00648823
):0.0351791
,
(
Vs799-Mus_m2-120129022-ighv:0.107969
,
(
Vs797-Mus_m2-120129022-ighv:0.101562
,
(
Vs647-Homo_sapiens-ABBA01174541.1-ighv:0.08125
,
(
(
Vs1163-Homo_sapiens-ABBA01074094.1-ighv:0.019802
,
Vs425-Homo_sapiens-ABBA01050774.1-ighv:0.019802
):0.0224876
,
(
Vs14-Homo_sapiens-ABBA01000439.1-ighv:0.035
,
(
Vs1157-Homo_sapiens-ABBA01074094.1-ighv:0.019802
,
Vs352-Homo_sapiens-ABBA01040616.1-ighv:0.019802
):0.015198
):0.00728961
):0.0389604
):0.0203125
):0.00640626
):0.00361816
):0.0155658
):0.0354059
):0.0385205
,
(
Vs786-Mus_m2-120129022-ighv:0.211654
,
(
(
Vs788-Mus_m2-120129022-ighv:0.00990099
,
Vs790-Mus_m2-120129022-ighv:0.00990099
):0.16685
,
(
Vs792-Mus_m2-120129022-ighv:0.182904
,
(
(
(
Vs11-Homo_sapiens-ABBA01245278.1-ighv:0.015
,
Vs353-Homo_sapiens-ABBA01040616.1-ighv:0.015
):0.06125
,
(
Vs1162-Homo_sapiens-ABBA01074094.1-ighv:0.06
,
Vs645-Homo_sapiens-ABBA01171626.1-ighv:0.06
):0.01625
):0.0523568
,
(
(
Vs1169-Homo_sapiens-ABBA01074102.1-ighv:0.0364583
,
Vs1159-Homo_sapiens-ABBA01074094.1-ighv:0.0364583
):0.0768117
,
(
(
(
(
Vs6-Homo_sapiens-ABBA01181057.1-ighv:0
,
Vs1167-Homo_sapiens-ABBA01074098.1-ighv:0
):0.00990099
,
Vs675-Homo_sapiens-ABBA01003309.1-ighv:0.00990099
):0.0643564
,
(
Vs1152-Homo_sapiens-ABBA01074091.1-ighv:0.0693069
,
(
Vs339-Homo_sapiens-ABBA01040607.1-ighv:0.029703
,
Vs51-Homo_sapiens-ABBA01007185.1-ighv:0.029703
):0.039604
):0.00495051
):0.0174497
,
(
(
Vs1158-Homo_sapiens-ABBA01074094.1-ighv:0.0519802
,
(
Vs1154-Homo_sapiens-ABBA01074092.1-ighv:0.0441176
,
Vs356-Homo_sapiens-ABBA01040618.1-ighv:0.0441176
):0.00786255
):0.0490795
,
(
Vs1172-Homo_sapiens-ABBA01074103.1-ighv:0.074375
,
(
(
Vs349-Homo_sapiens-ABBA01040615.1-ighv:0.01
,
Vs344-Homo_sapiens-ABBA01040613.1-ighv:0.01
):0.05875
,
(
Vs1156-Homo_sapiens-ABBA01074094.1-ighv:0.0420792
,
(
Vs345-Homo_sapiens-ABBA01040613.1-ighv:0.029703
,
Vs427-Homo_sapiens-ABBA01050780.1-ighv:0.029703
):0.0123762
):0.0266708
):0.005625
):0.0266847
):-0.00935256
):0.0215628
):0.0153368
):0.0542969
):-0.00615293
):0.0349036
):-0.0105752
):0.0179737
):0.5148
):0.101918
):0.497117
,
(
(
(
Vs508-Mus_m2-149736546-igkv:0.343422
,
(
Vs662-Homo_sapiens-ABBA01000473.1-igkv:0.350701
,
(
(
Vs449-Homo_sapiens-ABBA01055078.1-iglv:0.18
,
(
Vs457-Homo_sapiens-ABBA01055083.1-iglv:0.05
,
Vs460-Homo_sapiens-ABBA01055083.1-iglv:0.05
):0.13
):0.0931979
,
(
(
Vs468-Homo_sapiens-ABBA01055094.1-iglv:0.163139
,
(
Vs472-Homo_sapiens-ABBA01055095.1-iglv:0.15758
,
(
(
Vs473-Homo_sapiens-ABBA01055095.1-iglv:0.0669325
,
(
Vs476-Homo_sapiens-ABBA01055095.1-iglv:0.0578947
,
Vs467-Homo_sapiens-ABBA01055094.1-iglv:0.0578947
):0.00903775
):0.0747929
,
(
Vs479-Homo_sapiens-ABBA01055098.1-iglv:0.104605
,
(
Vs464-Homo_sapiens-ABBA01055094.1-iglv:0.0837629
,
(
Vs475-Homo_sapiens-ABBA01055095.1-iglv:0.0707071
,
(
Vs470-Homo_sapiens-ABBA01055094.1-iglv:0.040404
,
Vs465-Homo_sapiens-ABBA01055094.1-iglv:0.040404
):0.030303
):0.0130558
):0.0208424
):0.0371201
):0.0158544
):0.00555955
):0.0695516
,
(
Vs450-Homo_sapiens-ABBA01055082.1-iglv:0.193164
,
(
(
Vs469-Homo_sapiens-ABBA01055094.1-iglv:0.0492424
,
(
(
Vs477-Homo_sapiens-ABBA01055095.1-iglv:0.0252525
,
Vs474-Homo_sapiens-ABBA01055095.1-iglv:0.0252525
):0.0176768
,
(
Vs471-Homo_sapiens-ABBA01055095.1-iglv:0.0353535
,
Vs466-Homo_sapiens-ABBA01055094.1-iglv:0.0353535
):0.00757576
):0.00631313
):0.10029
,
(
(
Vs461-Homo_sapiens-ABBA01055084.1-iglv:0.039604
,
Vs454-Homo_sapiens-ABBA01055083.1-iglv:0.039604
):0.0668317
,
(
Vs453-Homo_sapiens-ABBA01055083.1-iglv:0.105198
,
(
Vs462-Homo_sapiens-ABBA01055084.1-iglv:0.0717822
,
(
Vs456-Homo_sapiens-ABBA01055083.1-iglv:0.019802
,
Vs459-Homo_sapiens-ABBA01055083.1-iglv:0.019802
):0.0519802
):0.0334158
):0.00123762
):0.0430973
):0.0436315
):0.0395265
):0.040507
):0.0775029
):-0.00727898
):0.472471
,
(
(
(
Vs125-Homo_sapiens-ABBA01018823.1-igkv:0.182371
,
(
Vs289-Mus_m2-94987271-igkv:0.037234
,
(
Vs483-Mus_m2-149736546-igkv:0.0204082
,
Vs487-Mus_m2-149736546-igkv:0.0204082
):0.0168259
):0.145137
):0.100635
,
(
Vs500-Mus_m2-149736546-igkv:0.289966
,
(
Vs497-Mus_m2-149736546-igkv:0.278152
,
(
Vs1125-Mus_m2-149736546-igkv:0.283939
,
(
(
(
Vs492-Mus_m2-149736546-igkv:0.127427
,
(
(
Vs495-Mus_m2-149736546-igkv:0.038835
,
Vs490-Mus_m2-149736546-igkv:0.038835
):0.0509709
,
(
Vs478-Mus_m2-149736546-igkv:0.038835
,
Vs1140-Mus_m2-149736546-igkv:0.038835
):0.0509709
):0.0376213
):0.0327891
,
(
(
Vs1087-Mus_m2-149736546-igkv:0.118947
,
(
(
Vs479-Mus_m2-149736546-igkv:0.0151515
,
Vs480-Mus_m2-149736546-igkv:0.0151515
):0.0416667
,
(
Vs1136-Mus_m2-149736546-igkv:0.030303
,
Vs481-Mus_m2-149736546-igkv:0.030303
):0.0265152
):0.0621286
):0.0268227
,
(
(
(
Vs9-Homo_sapiens-ABBA01200654.1-igkv:0.0606061
,
Vs1206-Homo_sapiens-ABBA01128994.1-igkv:0.0606061
):0.0419823
,
(
Vs633-Homo_sapiens-ABBA01139012.1-igkv:0.0842895
,
(
Vs5-Homo_sapiens-ABBA01181004.1-igkv:0.0580808
,
(
(
Vs648-Homo_sapiens-ABBA01178082.1-igkv:0
,
Vs663-Homo_sapiens-ABBA01000473.1-igkv:0
):0.020202
,
Vs627-Homo_sapiens-ABBA01086407.1-igkv:0.020202
):0.0378788
):0.0262087
):0.0182989
):0.0293624
,
(
Vs1126-Mus_m2-149736546-igkv:0.116793
,
(
Vs502-Mus_m2-149736546-igkv:0.092803
,
(
Vs491-Mus_m2-149736546-igkv:0.0883838
,
(
Vs486-Mus_m2-149736546-igkv:0.0530303
,
(
Vs494-Mus_m2-149736546-igkv:0.030303
,
Vs489-Mus_m2-149736546-igkv:0.030303
):0.0227273
):0.0353535
):0.00441919
):0.0239899
):0.0151578
):0.0138188
):0.0144467
):0.108755
,
(
(
(
Vs1099-Mus_m2-149736546-igkv:0.142201
,
(
Vs1128-Mus_m2-149736546-igkv:0.126356
,
(
Vs1104-Mus_m2-149736546-igkv:0.110681
,
(
Vs1124-Mus_m2-149736546-igkv:0.105006
,
(
Vs1121-Mus_m2-149736546-igkv:0.0909598
,
(
Vs1112-Mus_m2-149736546-igkv:0.0791613
,
(
(
Vs1114-Mus_m2-149736546-igkv:0.0484694
,
(
Vs1115-Mus_m2-149736546-igkv:0.0306122
,
Vs1109-Mus_m2-149736546-igkv:0.0306122
):0.0178571
):0.00849012
,
(
(
Vs1111-Mus_m2-149736546-igkv:0.0357143
,
Vs1103-Mus_m2-149736546-igkv:0.0357143
):0.0223214
,
(
Vs1105-Mus_m2-149736546-igkv:0.0561224
,
(
Vs1117-Mus_m2-149736546-igkv:0.057398
,
(
Vs1116-Mus_m2-149736546-igkv:0.0561224
,
(
Vs1110-Mus_m2-149736546-igkv:0.0408163
,
Vs1113-Mus_m2-149736546-igkv:0.0408163
):0.0153061
):0.00127551
):-0.00127551
):0.00191327
):-0.00107621
):0.0222018
):0.0117985
):0.0140458
):0.00567539
):0.0156745
):0.0158453
):0.0218476
,
(
Vs1130-Mus_m2-149736546-igkv:0.136715
,
(
Vs1129-Mus_m2-149736546-igkv:0.10361
,
(
(
Vs1108-Mus_m2-149736546-igkv:0.025
,
Vs1102-Mus_m2-149736546-igkv:0.025
):0.0662911
,
(
(
Vs1119-Mus_m2-149736546-igkv:0.0564474
,
(
Vs1120-Mus_m2-149736546-igkv:0.0473684
,
Vs1118-Mus_m2-149736546-igkv:0.0473684
):0.00907895
):0.0226316
,
(
Vs1106-Mus_m2-149736546-igkv:0.05625
,
(
Vs1122-Mus_m2-149736546-igkv:0.0575
,
(
Vs1100-Mus_m2-149736546-igkv:0.049505
,
Vs1107-Mus_m2-149736546-igkv:0.049505
):0.00799505
):-0.00125
):0.022829
):0.0122122
):0.0123191
):0.0331052
):0.0273331
):0.0856566
,
(
(
Vs1089-Mus_m2-149736546-igkv:0.126316
,
Vs1098-Mus_m2-149736546-igkv:0.126316
):0.107298
,
(
(
Vs774-Homo_sapiens-ABBA01018824.1-igkv:0.127604
,
(
(
Vs518-Mus_m2-149736546-igkv:0.0588235
,
Vs519-Mus_m2-149736546-igkv:0.0588235
):0.0367647
,
(
Vs513-Mus_m2-149736546-igkv:0.0821078
,
(
(
Vs515-Mus_m2-149736546-igkv:0.0294118
,
Vs512-Mus_m2-149736546-igkv:0.0294118
):0.0526961
,
(
(
Vs514-Mus_m2-149736546-igkv:0.0343137
,
Vs511-Mus_m2-149736546-igkv:0.0343137
):0.0294118
,
(
Vs516-Mus_m2-149736546-igkv:0.0343137
,
Vs517-Mus_m2-149736546-igkv:0.0343137
):0.0294118
):0.0183823
):0
):0.0134804
):0.0320159
):0.105626
,
(
(
(
Vs1082-Mus_m2-149736546-igkv:0.0204082
,
Vs1075-Mus_m2-149736546-igkv:0.0204082
):0.11352
,
(
Vs1071-Mus_m2-149736546-igkv:0.0612245
,
Vs1072-Mus_m2-149736546-igkv:0.0612245
):0.0727041
):0.0935879
,
(
Vs1088-Mus_m2-149736546-igkv:0.219018
,
(
(
Vs661-Homo_sapiens-ABBA01000473.1-igkv:0.0206186
,
Vs72-Homo_sapiens-ABBA01012128.1-igkv:0.0206186
):0.202146
,
(
Vs1085-Mus_m2-149736546-igkv:0.200266
,
(
(
Vs1078-Mus_m2-149736546-igkv:0.016129
,
Vs1073-Mus_m2-149736546-igkv:0.016129
):0.143155
,
(
Vs1086-Mus_m2-149736546-igkv:0.0930508
,
(
Vs1079-Mus_m2-149736546-igkv:0.0792079
,
(
(
Vs1081-Mus_m2-149736546-igkv:0.0240385
,
Vs1074-Mus_m2-149736546-igkv:0.0240385
):0.0360547
,
(
Vs1076-Mus_m2-149736546-igkv:0.0536836
,
(
Vs1083-Mus_m2-149736546-igkv:0.0392157
,
Vs1080-Mus_m2-149736546-igkv:0.0392157
):0.0144679
):0.00640957
):0.0191147
):0.0138428
):0.0662335
):0.0409817
):0.0224985
):-0.0037467
):0.00849868
):0.00571391
):0.000383422
):0.0160912
):0.0192663
):0.0149674
):-0.00578681
):0.0118139
):-0.00696009
):0.311765
,
(
(
(
Vs1097-Mus_m2-149736546-igkv:0.140299
,
(
Vs503-Mus_m2-149736546-igkv:0.149235
,
(
Vs1127-Mus_m2-149736546-igkv:0.132015
,
(
Vs1090-Mus_m2-149736546-igkv:0.11352
,
(
Vs1096-Mus_m2-149736546-igkv:0.0510204
,
(
Vs1094-Mus_m2-149736546-igkv:0.0408163
,
Vs1092-Mus_m2-149736546-igkv:0.0408163
):0.0102041
):0.0625
):0.0184949
):0.0172194
):-0.00893521
):0.0583313
,
(
(
(
Vs276-Mus_m2-98207768-igkv:0.0918367
,
Vs501-Mus_m2-149736546-igkv:0.0918367
):0.057398
,
(
Vs482-Mus_m2-149736546-igkv:0.142857
,
(
Vs493-Mus_m2-149736546-igkv:0.0816327
,
Vs484-Mus_m2-149736546-igkv:0.0816327
):0.0612245
):0.00637756
):0.0332815
,
(
(
Vs496-Mus_m2-149736546-igkv:0.107143
,
Vs485-Mus_m2-149736546-igkv:0.107143
):0.0840761
,
(
(
(
Vs1135-Mus_m2-149736546-igkv:0.0510204
,
Vs488-Mus_m2-149736546-igkv:0.0510204
):0.0663265
,
(
Vs1134-Mus_m2-149736546-igkv:0.0867347
,
Vs1141-Mus_m2-149736546-igkv:0.0867347
):0.0306122
):0.0923584
,
(
Vs504-Mus_m2-149736546-igkv:0.197492
,
(
(
Vs1123-Mus_m2-149736546-igkv:0.0408163
,
Vs507-Mus_m2-149736546-igkv:0.0408163
):0.151742
,
(
Vs1131-Mus_m2-149736546-igkv:0.209229
,
(
Vs736-Homo_sapiens-ABBA01015162.1-igkv:0.202803
,
(
(
Vs1133-Mus_m2-149736546-igkv:0.0459184
,
(
Vs1132-Mus_m2-149736546-igkv:0.0357143
,
Vs505-Mus_m2-149736546-igkv:0.0357143
):0.0102041
):0.125335
,
(
Vs498-Mus_m2-149736546-igkv:0.167923
,
(
Vs499-Mus_m2-149736546-igkv:0.12942
,
(
Vs21-Homo_sapiens-ABBA01001852.1-igkv:0.0991414
,
(
(
Vs1176-Homo_sapiens-ABBA01074234.1-igkv:0.0586735
,
(
Vs772-Homo_sapiens-ABBA01018824.1-igkv:0.0306122
,
Vs664-Homo_sapiens-ABBA01000473.1-igkv:0.0306122
):0.0280612
):0.0289342
,
(
Vs639-Homo_sapiens-ABBA01155544.1-igkv:0.100729
,
(
(
Vs1203-Homo_sapiens-ABBA01101181.1-igkv:0.0491071
,
(
(
Vs1200-Homo_sapiens-ABBA01092933.1-igkv:0
,
Vs638-Homo_sapiens-ABBA01153735.1-igkv:0
):0.0258291
,
(
Vs0-Homo_sapiens-ABBA01165617.1-igkv:0.0184949
,
(
(
Vs1214-Homo_sapiens-ABBA01160297.1-igkv:0.00510204
,
(
Vs644-Homo_sapiens-ABBA01167939.1-igkv:0
,
Vs643-Homo_sapiens-ABBA01166199.1-igkv:0
):0.00510204
):0.0114796
,
(
(
Vs652-Homo_sapiens-ABBA01202574.1-igkv:0
,
Vs640-Homo_sapiens-ABBA01158796.1-igkv:0
):0.00765306
,
(
Vs1215-Homo_sapiens-ABBA01162428.1-igkv:0.00510204
,
(
Vs415-Homo_sapiens-ABBA01049978.1-igkv:0
,
Vs637-Homo_sapiens-ABBA01151660.1-igkv:0
):0.00510204
):0.00255102
):0.00892857
):0.00191326
):0.00733418
):0.0232781
):0.0569602
,
(
(
Vs770-Homo_sapiens-ABBA01018824.1-igkv:0.0408163
,
Vs738-Homo_sapiens-ABBA01015162.1-igkv:0.0408163
):0.0415449
,
(
Vs737-Homo_sapiens-ABBA01015162.1-igkv:0.0921281
,
(
Vs660-Homo_sapiens-ABBA01000472.1-igkv:0.0816438
,
(
Vs773-Homo_sapiens-ABBA01018824.1-igkv:0.0636662
,
(
Vs739-Homo_sapiens-ABBA01015164.1-igkv:0.0625
,
(
Vs635-Homo_sapiens-ABBA01145231.1-igkv:0.0532525
,
(
Vs634-Homo_sapiens-ABBA01139012.1-igkv:0.0440051
,
(
Vs769-Homo_sapiens-ABBA01018824.1-igkv:0.0446429
,
(
Vs740-Homo_sapiens-ABBA01015164.1-igkv:0.0382653
,
(
Vs49-Homo_sapiens-ABBA01006960.1-igkv:0.0255102
,
Vs1201-Homo_sapiens-ABBA01093307.1-igkv:0.0255102
):0.0127551
):0.00637755
):-0.000637755
):0.00924744
):0.00924745
):0.0011662
):0.0179776
):0.0104843
):-0.00976686
):0.0237062
):-0.0053379
):-0.0131218
):0.0115337
):0.0302782
):0.0385037
):0.0033302
):0.0315494
):0.00642563
):-0.0166701
):0.00493328
):0.0122135
):-0.0184863
):-0.00870281
):0.0161146
):0.0320963
,
(
(
(
Vs1091-Mus_m2-149736546-igkv:0.0537634
,
(
Vs1095-Mus_m2-149736546-igkv:0.0103093
,
Vs1093-Mus_m2-149736546-igkv:0.0103093
):0.0434542
):0.101752
,
(
(
(
Vs4-Homo_sapiens-ABBA01180083.1-igkv:0
,
Vs624-Homo_sapiens-ABBA01077349.1-igkv:0
):0.0103093
,
Vs1194-Homo_sapiens-ABBA01076850.1-igkv:0.0103093
):0.0896907
,
Vs659-Homo_sapiens-ABBA01000472.1-igkv:0.1
):0.0555157
):0.0535113
,
(
(
Vs1084-Mus_m2-149736546-igkv:0.118273
,
(
(
Vs510-Mus_m2-149736546-igkv:0.0315789
,
Vs509-Mus_m2-149736546-igkv:0.0315789
):0.0318475
,
(
Vs1070-Mus_m2-149736546-igkv:0.0357143
,
Vs1077-Mus_m2-149736546-igkv:0.0357143
):0.0277121
):0.0548469
):0.0599263
,
(
Vs124-Homo_sapiens-ABBA01018823.1-igkv:0.155317
,
(
(
Vs771-Homo_sapiens-ABBA01018824.1-igkv:0.0210526
,
Vs735-Homo_sapiens-ABBA01015161.1-igkv:0.0210526
):0.0526316
,
(
Vs1211-Homo_sapiens-ABBA01139312.1-igkv:0.0561225
,
(
Vs741-Homo_sapiens-ABBA01015164.1-igkv:0.0102041
,
Vs768-Homo_sapiens-ABBA01018824.1-igkv:0.0102041
):0.0459184
):0.0175618
):0.0816327
):0.0228828
):0.0308273
):0.0217001
):0.311765
):0.160706
):0.357682
,
(
(
(
Vs546-Homo_sapiens-ABBA01061267.1-trav:0.307381
,
(
Vs540-Homo_sapiens-ABBA01061267.1-trav:0.262814
,
(
Vs525-Homo_sapiens-ABBA01061266.1-trav:0.191134
,
(
(
Vs545-Homo_sapiens-ABBA01061267.1-trav:0.100515
,
(
Vs535-Homo_sapiens-ABBA01061266.1-trav:0.056701
,
Vs539-Homo_sapiens-ABBA01061266.1-trav:0.056701
):0.0438144
):0.08005
,
(
(
Vs530-Homo_sapiens-ABBA01061266.1-trav:0.123711
,
Vs536-Homo_sapiens-ABBA01061266.1-trav:0.123711
):0.0442792
,
(
Vs243-Mus_m2-124902244-trav:0.171197
,
(
(
Vs217-Mus_m2-124902244-trav:0.0104167
,
Vs160-Mus_m2-124902244-trav:0.0104167
):0.131185
,
(
Vs201-Mus_m2-124902244-trav:0.030599
,
(
(
Vs196-Mus_m2-124902244-trav:0
,
Vs172-Mus_m2-124902244-trav:0
):0.0247396
,
(
Vs233-Mus_m2-124902244-trav:0.0180412
,
(
(
Vs169-Mus_m2-124902244-trav:0
,
Vs193-Mus_m2-124902244-trav:0
):0.00515464
,
Vs226-Mus_m2-124902244-trav:0.00515464
):0.0128866
):0.00669835
):0.00585938
):0.111003
):0.0295956
):-0.00320655
):0.0125749
):0.0105689
):0.0716792
):0.0445673
):0.00240389
,
(
(
(
(
Vs166-Mus_m2-124902244-trav:0
,
Vs190-Mus_m2-124902244-trav:0
):0.0463918
,
Vs223-Mus_m2-124902244-trav:0.0463918
):0.0326192
,
(
(
(
Vs197-Mus_m2-124902244-trav:0
,
Vs173-Mus_m2-124902244-trav:0
):0.0252525
,
Vs229-Mus_m2-124902244-trav:0.0252525
):0.0502683
,
(
(
Vs195-Mus_m2-124902244-trav:0
,
Vs171-Mus_m2-124902244-trav:0
):0.0416667
,
Vs228-Mus_m2-124902244-trav:0.0416667
):0.0338542
):0.00349012
):0.173582
,
(
(
Vs531-Homo_sapiens-ABBA01061266.1-trav:0.128906
,
(
Vs161-Mus_m2-124902244-trav:0.0286458
,
(
Vs218-Mus_m2-124902244-trav:0.00520833
,
Vs186-Mus_m2-124902244-trav:0.00520833
):0.0234375
):0.10026
):0.0242513
,
(
Vs543-Homo_sapiens-ABBA01061267.1-trav:0.148112
,
(
(
(
Vs204-Mus_m2-124902244-trav:0
,
Vs179-Mus_m2-124902244-trav:0
):0.015625
,
Vs236-Mus_m2-124902244-trav:0.015625
):0.127279
,
(
(
Vs188-Mus_m2-124902244-trav:0.0255102
,
(
Vs163-Mus_m2-124902244-trav:0
,
Vs220-Mus_m2-124902244-trav:0
):0.0255102
):0.112391
,
(
(
Vs212-Mus_m2-124902244-trav:0.00520833
,
Vs155-Mus_m2-124902244-trav:0.00520833
):0.0611979
,
(
(
Vs214-Mus_m2-124902244-trav:0.0102041
,
Vs157-Mus_m2-124902244-trav:0.0102041
):0.0418793
,
(
Vs151-Mus_m2-124902244-trav:0.0260417
,
Vs153-Mus_m2-124902244-trav:0.0260417
):0.0260417
):0.0143229
):0.071495
):0.00500238
):0.00520833
):0.00504558
):0.0994352
):0.0571921
):0.518013
,
(
(
Vs473-Mus_m2-149736546-trbv:0.397279
,
(
(
(
(
Vs253-Homo_sapiens-ABBA01034125.1-trbv:0.191688
,
(
(
Vs266-Homo_sapiens-ABBA01034125.1-trbv:0.0992268
,
(
Vs259-Homo_sapiens-ABBA01034125.1-trbv:0.0773196
,
(
Vs262-Homo_sapiens-ABBA01034125.1-trbv:0.0515464
,
Vs261-Homo_sapiens-ABBA01034125.1-trbv:0.0515464
):0.0257732
):0.0219072
):0.0376933
,
(
Vs252-Homo_sapiens-ABBA01034125.1-trbv:0.113402
,
Vs245-Homo_sapiens-ABBA01034123.1-trbv:0.113402
):0.023518
):0.054768
):0.0287427
,
(
Vs268-Homo_sapiens-ABBA01034125.1-trbv:0.192708
,
(
Vs459-Mus_m2-149736546-trbv:0.0833333
,
Vs461-Mus_m2-149736546-trbv:0.0833333
):0.109375
):0.0277225
):0.100626
,
(
(
(
Vs469-Mus_m2-149736546-trbv:0.19898
,
(
Vs279-Homo_sapiens-ABBA01034128.1-trbv:0.0816327
,
Vs1103-Homo_sapiens-ABBA01065043.1-trbv:0.0816327
):0.117347
):0.0469547
,
(
Vs276-Homo_sapiens-ABBA01034126.1-trbv:0.232781
,
(
Vs470-Mus_m2-149736546-trbv:0.206633
,
(
Vs471-Mus_m2-149736546-trbv:0.183673
,
(
Vs280-Homo_sapiens-ABBA01034128.1-trbv:0.0612245
,
Vs1104-Homo_sapiens-ABBA01065043.1-trbv:0.0612245
):0.122449
):0.0229592
):0.026148
):0.0131537
):0.0521182
,
(
(
Vs242-Homo_sapiens-ABBA01034123.1-trbv:0.153061
,
Vs456-Mus_m2-149736546-trbv:0.153061
):0.139223
,
(
Vs882-Homo_sapiens-ABBA01034127.1-trbv:0.273031
,
(
(
Vs465-Mus_m2-149736546-trbv:0.184311
,
(
Vs466-Mus_m2-149736546-trbv:0.160714
,
(
Vs273-Homo_sapiens-ABBA01034126.1-trbv:0.125
,
(
Vs271-Homo_sapiens-ABBA01034125.1-trbv:0.0102041
,
Vs272-Homo_sapiens-ABBA01034125.1-trbv:0.0102041
):0.114796
):0.0357143
):0.0235969
):0.063068
,
(
Vs274-Homo_sapiens-ABBA01034126.1-trbv:0.25
,
(
(
Vs267-Homo_sapiens-ABBA01034125.1-trbv:0.160714
,
(
(
Vs251-Homo_sapiens-ABBA01034125.1-trbv:0.0816327
,
Vs249-Homo_sapiens-ABBA01034125.1-trbv:0.0816327
):0.0548469
,
(
Vs265-Homo_sapiens-ABBA01034125.1-trbv:0.0918367
,
Vs258-Homo_sapiens-ABBA01034125.1-trbv:0.0918367
):0.0446429
):0.0242347
):0.0512596
,
(
Vs464-Mus_m2-149736546-trbv:0.178571
,
(
Vs270-Homo_sapiens-ABBA01034125.1-trbv:0.0867347
,
(
Vs256-Homo_sapiens-ABBA01034125.1-trbv:0.0765306
,
Vs254-Homo_sapiens-ABBA01034125.1-trbv:0.0765306
):0.0102041
):0.0918367
):0.0334024
):0.0380262
):-0.00262077
):0.0256514
):0.0192539
):0.00576803
):0.0230047
):0.0360287
,
(
(
(
(
Vs3-Homo_sapiens-ABBA01174525.1-trbv:0.00526316
,
(
Vs1100-Homo_sapiens-ABBA01065042.1-trbv:0
,
Vs1205-Homo_sapiens-ABBA01122758.1-trbv:0
):0.00526316
):0.126316
,
Vs282-Homo_sapiens-ABBA01034128.1-trbv:0.131579
):0.144812
,
(
(
Vs281-Homo_sapiens-ABBA01034128.1-trbv:0.23519
,
(
(
Vs250-Homo_sapiens-ABBA01034125.1-trbv:0.168304
,
(
(
Vs263-Homo_sapiens-ABBA01034125.1-trbv:0.0794271
,
(
Vs260-Homo_sapiens-ABBA01034125.1-trbv:0.0618557
,
(
Vs264-Homo_sapiens-ABBA01034125.1-trbv:0.0515464
,
Vs257-Homo_sapiens-ABBA01034125.1-trbv:0.0515464
):0.0103093
):0.0175714
):0.0177459
,
(
Vs1210-Homo_sapiens-ABBA01137902.1-trbv:0.0773196
,
Vs246-Homo_sapiens-ABBA01034123.1-trbv:0.0773196
):0.0198534
):0.0711313
):0.0423085
,
(
(
Vs460-Mus_m2-149736546-trbv:0.10567
,
(
Vs462-Mus_m2-149736546-trbv:0.0515464
,
Vs463-Mus_m2-149736546-trbv:0.0515464
):0.0541237
):0.0786082
,
(
Vs269-Homo_sapiens-ABBA01034125.1-trbv:0.118557
,
Vs255-Homo_sapiens-ABBA01034125.1-trbv:0.118557
):0.0657216
):0.0263345
):0.0245777
):0.00443962
,
(
Vs277-Homo_sapiens-ABBA01034128.1-trbv:0.235825
,
(
Vs283-Homo_sapiens-ABBA01034128.1-trbv:0.21134
,
(
Vs284-Homo_sapiens-ABBA01034128.1-trbv:0.139175
,
Vs472-Mus_m2-149736546-trbv:0.139175
):0.072165
):0.0244845
):0.00380537
):0.0367605
):0.0747442
,
(
(
Vs275-Homo_sapiens-ABBA01034126.1-trbv:0.185567
,
Vs467-Mus_m2-149736546-trbv:0.185567
):0.152914
,
(
Vs455-Mus_m2-149736546-trbv:0.245825
,
(
(
Vs243-Homo_sapiens-ABBA01034123.1-trbv:0.119792
,
Vs457-Mus_m2-149736546-trbv:0.119792
):0.119886
,
(
Vs458-Mus_m2-149736546-trbv:0.191406
,
(
Vs244-Homo_sapiens-ABBA01034123.1-trbv:0.0927835
,
(
Vs247-Homo_sapiens-ABBA01034123.1-trbv:0.0257732
,
Vs248-Homo_sapiens-ABBA01034124.1-trbv:0.0257732
):0.0670103
):0.0986227
):0.0482711
):0.00614797
):0.092656
):0.0126536
):0.0059512
):0.040193
):0.380653
,
(
(
(
Vs1077-Homo_sapiens-ABBA01061638.1-trav:0.428314
,
(
Vs566-Homo_sapiens-ABBA01061277.1-trdv:0.412069
,
(
(
Vs451-Homo_sapiens-ABBA01055082.1-iglv:0.267677
,
Vs463-Homo_sapiens-ABBA01055087.1-iglv:0.267677
):0.0726644
,
(
(
Vs904-Mus_m2-98207768-iglv:0.0360825
,
Vs903-Mus_m2-98207768-iglv:0.0360825
):0.336625
,
(
Vs45-Mus_m2-130694993-iglv:0.342909
,
(
(
Vs448-Homo_sapiens-ABBA01055078.1-iglv:0.154639
,
Vs478-Homo_sapiens-ABBA01055098.1-iglv:0.154639
):0.11915
,
(
Vs280-Mus_m2-98207768-iglv:0.222588
,
(
Vs452-Homo_sapiens-ABBA01055083.1-iglv:0.123762
,
(
Vs455-Homo_sapiens-ABBA01055083.1-iglv:0.0693069
,
(
Vs458-Homo_sapiens-ABBA01055083.1-iglv:0.0445545
,
Vs715-Homo_sapiens-ABBA01010264.1-iglv:0.0445545
):0.0247525
):0.0544555
):0.0988254
):0.0512014
):0.0691199
):0.0297983
):-0.0323662
):0.071728
):0.0162451
):-0.0020934
,
(
(
(
Vs286-Homo_sapiens-ABBA01034129.1-trbv:0.390549
,
(
(
Vs147-Mus_m2-124902244-trav:0.169355
,
(
Vs524-Homo_sapiens-ABBA01061265.1-trav:0.0967742
,
Vs523-Homo_sapiens-ABBA01061263.1-trav:0.0967742
):0.0725807
):0.209017
,
(
Vs533-Homo_sapiens-ABBA01061266.1-trav:0.349209
,
(
(
(
Vs164-Mus_m2-124902244-trav:0
,
Vs221-Mus_m2-124902244-trav:0
):0.326964
,
(
Vs565-Homo_sapiens-ABBA01061274.1-trav:0.316144
,
(
(
Vs211-Mus_m2-124902244-trav:0.123656
,
(
(
(
Vs202-Mus_m2-124902244-trav:0
,
Vs177-Mus_m2-124902244-trav:0
):0.0268817
,
Vs234-Mus_m2-124902244-trav:0.0268817
):0.0672043
,
(
(
Vs194-Mus_m2-124902244-trav:0
,
Vs170-Mus_m2-124902244-trav:0
):0.00537634
,
Vs227-Mus_m2-124902244-trav:0.00537634
):0.0887097
):0.0295699
):0.122212
,
(
Vs550-Homo_sapiens-ABBA01061268.1-trav:0.230781
,
(
Vs242-Mus_m2-124902244-trav:0.185636
,
(
(
Vs181-Mus_m2-124902244-trav:0
,
Vs206-Mus_m2-124902244-trav:0
):0.155253
,
(
Vs209-Mus_m2-124902244-trav:0.10192
,
(
(
Vs224-Mus_m2-124902244-trav:0.0289474
,
(
Vs167-Mus_m2-124902244-trav:0.00520833
,
Vs191-Mus_m2-124902244-trav:0.00520833
):0.023739
):0.0496799
,
(
(
Vs198-Mus_m2-124902244-trav:0
,
Vs174-Mus_m2-124902244-trav:0
):0.0340204
,
(
Vs230-Mus_m2-124902244-trav:0.0422207
,
(
Vs184-Mus_m2-124902244-trav:0.0212766
,
Vs240-Mus_m2-124902244-trav:0.0212766
):0.0209442
):-0.00820036
):0.0446069
):0.0232929
):0.0533325
):0.0303832
):0.0451447
):0.0150874
):0.0702757
):0.0108198
):0.0229414
,
(
Vs534-Homo_sapiens-ABBA01061266.1-trav:0.351895
,
(
Vs552-Homo_sapiens-ABBA01061270.1-trav:0.336911
,
(
(
Vs246-Mus_m2-124902244-trdv:0.240448
,
(
Vs558-Homo_sapiens-ABBA01061272.1-trav:0.204301
,
Vs556-Homo_sapiens-ABBA01061271.1-trav:0.204301
):0.0361473
):0.0454475
,
(
Vs559-Homo_sapiens-ABBA01061272.1-trav:0.241906
,
(
Vs553-Homo_sapiens-ABBA01061270.1-trav:0.220109
,
(
Vs555-Homo_sapiens-ABBA01061271.1-trav:0.188172
,
Vs244-Mus_m2-124902244-trav:0.188172
):0.0319366
):0.0217976
):0.0439896
):0.0510154
):0.0149838
):-0.0019902
):-0.000696301
):0.0291635
):0.0121771
):0.0243504
,
(
(
(
Vs526-Homo_sapiens-ABBA01061266.1-trav:0.132979
,
Vs148-Mus_m2-124902244-trav:0.132979
):0.0917553
,
(
Vs554-Homo_sapiens-ABBA01061270.1-trav:0.169289
,
(
Vs557-Homo_sapiens-ABBA01061272.1-trav:0.132979
,
Vs245-Mus_m2-124902244-trav:0.132979
):0.0363102
):0.0554451
):0.188458
,
(
Vs1006-Homo_sapiens-ABBA01053779.1-trav:0.411004
,
(
(
Vs1072-Homo_sapiens-ABBA01061278.1-trdv:0.17
,
Vs865-Mus_m2-124902244-trdv:0.17
):0.191605
,
(
(
(
Vs231-Mus_m2-124902244-trdv:0.040404
,
(
Vs199-Mus_m2-124902244-trdv:0
,
Vs175-Mus_m2-124902244-trdv:0
):0.040404
):0.134268
,
(
(
Vs168-Mus_m2-124902244-trdv:0
,
Vs192-Mus_m2-124902244-trdv:0
):0.065
,
Vs225-Mus_m2-124902244-trdv:0.065
):0.109672
):0.0734516
,
(
Vs551-Homo_sapiens-ABBA01061270.1-trdv:0.239477
,
(
(
(
Vs183-Mus_m2-124902244-trav:0.010101
,
Vs239-Mus_m2-124902244-trav:0.010101
):0
,
Vs208-Mus_m2-124902244-trav:0.010101
):0.221048
,
(
Vs542-Homo_sapiens-ABBA01061267.1-trav:0.209995
,
(
(
Vs247-Mus_m2-124902244-trdv:0.0102041
,
Vs248-Mus_m2-124902244-trdv:0.0102041
):0.142857
,
(
Vs561-Homo_sapiens-ABBA01061272.1-trav:0.0357143
,
Vs562-Homo_sapiens-ABBA01061272.1-trav:0.0357143
):0.117347
):0.0569341
):0.0211538
):0.00832786
):0.00864623
):0.113482
):0.0493983
):0.00218835
):0.00170773
):0.00088191
,
(
(
(
Vs285-Homo_sapiens-ABBA01034128.1-trbv:0.0353535
,
Vs1101-Homo_sapiens-ABBA01065042.1-trbv:0.0353535
):0.189394
,
(
Vs278-Homo_sapiens-ABBA01034128.1-trbv:0.0643564
,
Vs1102-Homo_sapiens-ABBA01065043.1-trbv:0.0643564
):0.160391
):0.188987
,
(
(
Vs114-Mus_m2-120421639-trgv:0.377679
,
(
Vs115-Mus_m2-120421639-trgv:0.361926
,
(
Vs1036-Homo_sapiens-ABBA01056928.1-trgv:0.35101
,
(
Vs113-Mus_m2-120421639-trgv:0.2575
,
(
Vs853-Mus_m2-120421639-trgv:0.0696782
,
(
Vs116-Mus_m2-120421639-trgv:0.05
,
Vs117-Mus_m2-120421639-trgv:0.05
):0.0196782
):0.187822
):0.0935101
):0.0109159
):0.0157529
):0.0316488
,
(
Vs564-Homo_sapiens-ABBA01061273.1-trav:0.385197
,
(
Vs112-Mus_m2-120421639-trgv:0.293936
,
(
(
(
Vs1041-Homo_sapiens-ABBA01056929.1-trgv:0.0490196
,
Vs1039-Homo_sapiens-ABBA01056929.1-trgv:0.0490196
):0.0196078
,
Vs1042-Homo_sapiens-ABBA01056929.1-trgv:0.0686275
):0.0795082
,
(
Vs1037-Homo_sapiens-ABBA01056929.1-trgv:0.144802
,
(
Vs1035-Homo_sapiens-ABBA01056928.1-trgv:0.112745
,
(
Vs1038-Homo_sapiens-ABBA01056929.1-trgv:0.0490196
,
Vs1040-Homo_sapiens-ABBA01056929.1-trgv:0.0490196
):0.0637255
):0.0320569
):0.00333372
):0.1458
):0.0912617
):0.0241304
):0.00440627
):0.00204751
):0.0104393
):0.244284
,
(
(
Vs532-Homo_sapiens-ABBA01061266.1-trav:0.290559
,
(
Vs528-Homo_sapiens-ABBA01061266.1-trav:0.258976
,
(
Vs547-Homo_sapiens-ABBA01061267.1-trav:0.144947
,
(
(
Vs216-Mus_m2-124902244-trav:0.0106383
,
Vs159-Mus_m2-124902244-trav:0.0106383
):0.0950798
,
(
Vs207-Mus_m2-124902244-trav:0.0505319
,
(
Vs182-Mus_m2-124902244-trav:0.0265957
,
Vs238-Mus_m2-124902244-trav:0.0265957
):0.0239362
):0.0551862
):0.0392287
):0.114029
):0.0315825
):0.0339993
,
(
(
(
Vs527-Homo_sapiens-ABBA01061266.1-trav:0.189474
,
(
(
Vs232-Mus_m2-124902244-trav:0.0208333
,
(
Vs176-Mus_m2-124902244-trav:0
,
Vs200-Mus_m2-124902244-trav:0
):0.0208333
):0.0677083
,
(
Vs241-Mus_m2-124902244-trav:0.0208333
,
Vs149-Mus_m2-124902244-trav:0.0208333
):0.0677083
):0.100932
):0.0249272
,
(
Vs541-Homo_sapiens-ABBA01061267.1-trav:0.197595
,
(
(
Vs150-Mus_m2-124902244-trav:0.127604
,
(
(
Vs203-Mus_m2-124902244-trav:0
,
Vs178-Mus_m2-124902244-trav:0
):0.0208333
,
Vs235-Mus_m2-124902244-trav:0.0208333
):0.106771
):0.0329222
,
(
Vs537-Homo_sapiens-ABBA01061266.1-trav:0.147368
,
(
(
Vs219-Mus_m2-124902244-trav:0
,
Vs162-Mus_m2-124902244-trav:0
):0.00526316
,
Vs187-Mus_m2-124902244-trav:0.00526316
):0.142105
):0.0131579
):0.0370682
):0.0168063
):0.0980351
,
(
(
(
(
(
Vs189-Mus_m2-124902244-trav:0
,
Vs165-Mus_m2-124902244-trav:0
):0.0478723
,
Vs222-Mus_m2-124902244-trav:0.0478723
):0.0899269
,
(
(
(
Vs180-Mus_m2-124902244-trav:0
,
Vs205-Mus_m2-124902244-trav:0
):0.0265957
,
Vs237-Mus_m2-124902244-trav:0.0265957
):0.0964096
,
(
(
Vs152-Mus_m2-124902244-trav:0.0345745
,
(
(
Vs215-Mus_m2-124902244-trav:0
,
Vs158-Mus_m2-124902244-trav:0
):0.0105263
,
Vs185-Mus_m2-124902244-trav:0.0105263
):0.0240482
):0.0412234
,
(
(
Vs213-Mus_m2-124902244-trav:0
,
Vs156-Mus_m2-124902244-trav:0
):0.0691489
,
(
Vs210-Mus_m2-124902244-trav:0
,
Vs154-Mus_m2-124902244-trav:0
):0.0691489
):0.00664894
):0.0472074
):0.0147939
):0.0767497
,
(
Vs544-Homo_sapiens-ABBA01061267.1-trav:0.121053
,
Vs538-Homo_sapiens-ABBA01061266.1-trav:0.121053
):0.0934963
):0.108385
,
(
Vs563-Homo_sapiens-ABBA01061273.1-trav:0.294548
,
(
Vs560-Homo_sapiens-ABBA01061272.1-trav:0.289712
,
(
Vs549-Homo_sapiens-ABBA01061268.1-trav:0.284574
,
(
Vs548-Homo_sapiens-ABBA01061268.1-trav:0.228723
,
Vs529-Homo_sapiens-ABBA01061266.1-trav:0.228723
):0.055851
):0.00513721
):0.0048362
):0.0283859
):-0.0104978
):0.0121218
):0.244284
):0.136369
):0.13736
):0.31214
):0.283682
)
;
