# Supplementary material for: Iterative Variable Gene Discovery from Whole Genome Sequencing with a Bootstrapped Multiresolution Algorithm
Source: Comput Math Methods Med. 2019 Feb 11;2019:3780245. doi: 10.1155/2019/3780245 (PMC6388353; doi:10.1155/2019/3780245)
Supplement: Supplementary Materials — supp_materialsV2.pdf: this is an updated document, which includes new figures requested by the reviewer. sequences_alignments.zip: these are genome sequence files that are relevant for reproducing some of the results. [file 3780245.f1.zip › 3780245.f1/sequences_alignments/all_init.fasta]

>Vs6-Homo_sapiens-ABBA01181057.1-ighv
-----VQCQVQLVES--GGGVVQPGRSLRLSCA-ASG-FTF-SS--YG-MHWVRQAPGKG
L-EWVAVISY---DGSNKYYADSVKGRFTISRDN---SKNTLYLQMNSLRAEDTAVYYCA
K-------
>Vs625-Homo_sapiens-ABBA01078092.1-ighv
-----VLSQVQLQES--GPGLVKPSQTLSLTCT-VSG-GSI-SSGGYY-WSWIRQHPGKG
L-EWIGYIYY-S-GS--TYYNPSLKSRVTISVDT---SKNQFSLKLSSVTAADTAVYYCA
R-------
>Vs1167-Homo_sapiens-ABBA01074098.1-ighv
-----VQCQVQLVES--GGGVVQPGRSLRLSCA-ASG-FTF-SS--YG-MHWVRQAPGKG
L-EWVAVISY---DGSNKYYADSVKGRFTISRDN---SKNTLYLQMNSLRAEDTAVYYCA
K-------
>Vs1166-Homo_sapiens-ABBA01074096.1-ighv
-----VLSQVQLQES--GPGLVKPSQTLSLTCT-VSG-GSI-SSGDYY-WSWIRQPPGKG
L-EWIGYIYY-S-GS--TYYNPSLKSRVTISVDT---SKNQFSLKLSSVTAADTAVYYCA
R-------
>Vs1165-Homo_sapiens-ABBA01074095.1-ighv
-----VLSQVTLKES--GPVLVKPTETLTLTCT-VSG-FSL-SNARMG-VSWIRQPPGKA
L-EWLAHIFS-N-DE--KSYSTSLKSRLTISKDT---SKSQVVLTMTNMDPVDTATYYCA
RI------
>Vs1164-Homo_sapiens-ABBA01074095.1-ighv
-----VLSQVQLQES--GPGLVKPSDTLSLTCA-VSG-YSI-SS-SNW-WGWIRQPPGKG
L-EWIGYIYY-S-GS--TYYNPSLKSRVTMSVDT---SKNQFSLKLSSVTAVDTAVYYCA
R-------
>Vs1163-Homo_sapiens-ABBA01074094.1-ighv
-----VQCQVQLVES--GGGLVKPGGSLRLSCA-ASG-FTF-SD--YY-MSWIRQAPGKG
L-EWVSYISS---SGSTIYYADSVKGRFTISRDN---AKNSLYLQMNSLRAEDTAVYYCA
R-------
>Vs1162-Homo_sapiens-ABBA01074094.1-ighv
-----VQCEVQLVES--GGGLVQPGGSLRLSCA-ASG-FTF-SS--YD-MHWVRQATGKG
L-EWVSAIG----TAGDTYYPGSVKGRFTISREN---AKNSLYLQMNSLRAGDTAVYYCA
R-------
>Vs1161-Homo_sapiens-ABBA01074094.1-ighv
-----VQCEVQLVES--GGGLVKPGGSLRLSCA-ASG-FTF-SN--AW-MSWVRQAPGKG
L-EWVGRIKS-KTDGGTTDYAAPVKGRFTISRDD---SKNTLYLQMNSLKTEDTAVYYCT
T-------
>Vs1160-Homo_sapiens-ABBA01074094.1-ighv
-----AHSQVQLVQS--GAEVKKPGASVKVSCK-ASG-YTF-TS--YG-ISWVRQAPGQG
L-EWMGWISA-Y--NGNTNYAQKLQGRVTMTTDT---STSTAYMELRSLRSDDTAVYYCA
R-------
>Vs35-Homo_sapiens-ABBA01004577.1-ighv
-----VQCEVQLVES--GGGLVQPGGSLRLSCA-ASG-FTF-SD--HY-MSWVRQAQGKG
L-ELVGLIRN-KANSYTTEYAASVKGRLTISRED---SKNTLYLQMSSLKTEDLAVYYCA
R-------
>Vs31-Homo_sapiens-ABBA01004293.1-ighv
-----VLSQVQLQES--GPGLVKPSETLSLTCV-VSG-GSI-SS-SNW-WSWVRQPPGKG
L-EWIGEIYH-S-GS--PNYNPSLKSRVTISVDK---SKNQFSLKLSSVTAADTAVYYCA
R-------
>Vs1152-Homo_sapiens-ABBA01074091.1-ighv
-----VQCEVQLVES--GGGLVQPGGSLRLSCA-ASG-FTF-SS--YW-MSWVRQAPGKG
L-EWVANIKQ---DGSEKYYVDSVKGRFTISRDN---AKNSLYLQMNSLRAEDTAVYYCA
R-------
>Vs117-Homo_sapiens-ABBA01017836.1-ighv
-----VLSQVQLQES--GPGLVKPSETLSLTCV-VSG-GSI-SS-SNW-WSWVRQPPGKG
L-EWIGEIYH-S-GS--PNYNPSLKSRVTISVDK---SKNQFSLKLSSVTAADTAVYYCA
R-------
>Vs658-Homo_sapiens-ABBA01000438.1-ighv
-----THAEVQLVQS--GAEVKKPGATVKISCK-VSG-YTF-TD--YY-MHWVQQAPGKG
L-EWMGLVDP-E--DGETIYAEKFQGRVTITADT---STDTAYMELSSLRSEDTAVYYCA
T-------
>Vs11-Homo_sapiens-ABBA01245278.1-ighv
-----VQCEDQLVES--GGGLVQPGGSLRPSCA-ASG-FAF-SS--YA-LHWVRRAPGKG
L-EWVSAIG----TGGDTYYADSVMGRFTISRDN---AKKSLYLHMNSLIAEDMAVYYCA
R-------
>Vs16-Homo_sapiens-ABBA01000440.1-ighv
-----VQSQVQLVQS--GAEVKKPGSSVKVSCK-ASG-GTF-SS--YA-ISWVRQAPGQG
L-EWMGGIIP-I--FGTANYAQKFQGRVTITADK---STSTAYMELSSLRSEDTAVYYCA
R-------
>Vs1207-Homo_sapiens-ABBA01134518.1-ighv
-----AQSQVQLVQS--GAEVKKPGASVKVSCK-ASG-YTF-TS--YC-MHWVRQVHAQG
L-EWMGLVCP-S--DGSTSYAQKFQARVTITRDT---SMSTAYMELSSLRSEDTAMYYCV
R-------
>Vs14-Homo_sapiens-ABBA01000439.1-ighv
-----VQCEVQLVES--GGGLVKPGGSLRLSCA-ASG-FTF-SD--YY-MNWVRQAPGKG
L-EWVSSISS---S-STIYYADSVKGRFTISRDN---AKNSLYLQMNSLRAEDTAVYYCA
R-------
>Vs15-Homo_sapiens-ABBA01000439.1-ighv
-----VLSQVTLKES--GPALVKPTQTLTLTCT-FSG-FSL-STSGMR-VSWIRQPPGKA
L-EWLARIDW-D-DD--KFYSTSLKTRLTISKDT---SKNQVVLTMTNMDPVDTATYYCA
RI------
>Vs775-Homo_sapiens-ABBA01018841.1-ighv
-----VLSQVQLQES--GPGLVKPSETLSLTCA-VSG-YSI-SS-GYY-WGWIRQPPGKG
L-EWIGSIYH-S-GS--TYYNPSLKSRVTISVDT---SKNQFSLKLSSVTAADTAVYYCA
R-------
>Vs1169-Homo_sapiens-ABBA01074102.1-ighv
-----VQCEVQLVES--GGGLVQPGGSLRLSCA-ASG-FTF-SN--SD-MNWVHQAPGKG
L-EWVSGVSW---NGSRTHYADSVKGRFIISRDN---SRNTLYLQTNSLRAEDTAVYYCV
R-------
>Vs1168-Homo_sapiens-ABBA01074100.1-ighv
-----VLSQLQLQES--GSGLVKPSQTLSLTCA-VSG-GSI-SSGGYS-WSWIRQPPGKG
L-EWIGYIYH-S-GS--TYYNPSLKSRVTISVDR---SKNQFSLKLSSVTAADTAVYYCA
R-------
>Vs675-Homo_sapiens-ABBA01003309.1-ighv
-----VQCQVQLVES--GGGVVQPGRSLRLSCA-ASG-FTF-SS--YG-MHWVRQAPGKG
L-EWVAVISY---DGSNKYYADSVKGRFTISRDN---SKNTLYLQMNSLRAGDTAVYYCA
R-------
>Vs654-Homo_sapiens-ABBA01210258.1-ighv
-----VLSQVQLQES--GPGLVKPSQTLSLTCT-VSG-GSI-SSGGYY-WSWIRQHPGKG
L-EWIGYIYY-S-GS--TYYNPSLKSRVTISVDT---SKNQFSLKLSSVTAADTAVYYCA
R-------
>Vs707-Homo_sapiens-ABBA01009461.1-ighv
-----VLSQVTLKES--GPALVKPTETLTLTCT-LSG-FSL-STSGMG-MSWIRQPPGKA
L-EWLAHIFL-N-DK--KSYSTSLKNRLIISKDT---SKSQVVLTMTNMDPVDTATYYCA
WR------
>Vs1171-Homo_sapiens-ABBA01074103.1-ighv
-----VLSQLQLQES--GPGLVKPSETLSLTCT-VSG-GSI-SSSSYY-WGWIRQPPGKG
L-EWIGSIYY-S-GS--TYYNPSLKSRVTISVDT---SKNQFSLKLSSVTAADTAVYYCA
--------
>Vs1156-Homo_sapiens-ABBA01074094.1-ighv
-----VQCEVQLLES--GGGLVQPGGSLRLSCA-ASG-FTF-SS--YA-MSWVRQAPGKG
L-EWVSAISG---SGGSTYYADSVKGRFTISRDN---SKNTLYLQMNSLRAEDTAVYYCA
K-------
>Vs1157-Homo_sapiens-ABBA01074094.1-ighv
-----VQCEVQLVES--GGGLVKPGGSLRLSCA-ASG-FTF-SS--YS-MNWVRQAPGKG
L-EWVSSISS---SSSYIYYADSVKGRFTISRDN---AKNSLYLQMNSLRAEDTAVYYCA
R-------
>Vs1154-Homo_sapiens-ABBA01074092.1-ighv
-----VQCEVQLVES--GGGLVQPGRSLRLSCA-ASG-FTF-DD--YA-MHWVRQAPGKG
L-EWVSGISW---NSGSIGYADSVKGRFTISRDN---AKNSLYLQMNSLRAEDTALYYCA
KD------
>Vs1155-Homo_sapiens-ABBA01074094.1-ighv
-----THAQVQLVQS--GAEVKKPGASVKVSCK-VSG-YTL-TE--LS-MHWVRQAPGKG
L-EWMGGFDP-E--DGETIYAQKFQGRVTMTEDT---STDTAYMELSSLRSEDTAVYYCA
T-------
>Vs96-Homo_sapiens-ABBA01015827.1-ighv
-----AHSQVQLVQS--GAEVKKPGASVKVSCK-ASG-YIF-TD--YY-MHWVRQAPGQE
L-GWMGRINP-N--SGGTNYAQKFQGRVTMTRDT---SISTAYTELSSLRSEDTATYYCA
R-------
>Vs1153-Homo_sapiens-ABBA01074091.1-ighv
-----VLSQITLKES--GPTLVKPTQTLTLTCT-FSG-FSL-STSGVG-VGWIRQPPGKA
L-EWLALIYW-D-DD--KRYSPSLKSRLTITKDT---SKNQVVLTMTNMDPVDTATYYCA
HR------
>Vs1150-Homo_sapiens-ABBA01074089.1-ighv
-----AHSQVQLVQS--GSELKKPGASVKVSCK-ASG-YTF-TS--YA-MNWVRQAPGQG
L-EWMGWINT-N--TGNPTYAQGFTGRFVFSLDT---SVSTAYLQISSLKAEDTAVYYCA
R-------
>Vs1151-Homo_sapiens-ABBA01074091.1-ighv
-----AHSQVQLVQS--GAEVKKPGASVKVSCK-ASG-YTF-TS--YD-INWVRQATGQG
L-EWMGWMNP-N--SGNTGYAQKFQGRVTMTRNT---SISTAYMELSSLRSEDTAVYYCA
R-------
>Vs1158-Homo_sapiens-ABBA01074094.1-ighv
-----VQCEVQLVES--GGGVVRPGGSLRLSCA-ASG-FTF-DD--YG-MSWVRQAPGKG
L-EWVSGINW---NGGSTGYADSVKGRFTISRDN---AKNSLYLQMNSLRAEDTALYHCA
R-------
>Vs1159-Homo_sapiens-ABBA01074094.1-ighv
----------QLVES--GGGLVEPGGSLRLSCA-ASG-FTF-SN--SD-MNWVRQAPGKG
L-EWVSGVSW---NGSRTHYADSVKGRFIISRDN---SRNFLYQQMNSLRPEDMAVYYCV
R-------
>Vs338-Homo_sapiens-ABBA01040607.1-ighv
-----TYSQVQLVQS--GHEVKQPGASVKVSCK-ASG-YSF-TT--YG-MNWVPQAPGQG
L-EWMGWFNT-Y--TGNPTYAQGFTGRFVFSMDT---SASTAYLQISSLKAEDMAMYYCA
R-------
>Vs339-Homo_sapiens-ABBA01040607.1-ighv
-----VQCEVQLVES--GGGLVQPGGSLRLSCA-ASG-FTF-SS--YW-MHWVRQAPGKG
L-VWVSRINS---DGSSTSYADSVKGRFTISRDN---AKNTLYLQMNSLRAEDTAVYYCA
R-------
>Vs645-Homo_sapiens-ABBA01171626.1-ighv
-----VQCEVQLVQS--GGGLVHPGGSLRLSCA-GSG-FTF-SS--YA-MHWVRQAPGKG
L-EWVSAIG----TGGGTYYADSVKGRFTISRDN---AKNSLYLQMNSLRAEDMAVYYCA
R-------
>Vs1147-Homo_sapiens-ABBA01074086.1-ighv
-----AHSQVQLVQS--GAEVKKPGASVKVSCK-ASG-YTF-TG--YY-MHWVRQAPGQG
L-EWMGRINP-N--SGGTNYAQKFQGRVTMTRDT---SISTAYMELSRLRSDDTAVYYCA
R-------
>Vs647-Homo_sapiens-ABBA01174541.1-ighv
-----AQCEVQLVES--GGGLVQPGGSLRLSCP-ASG-FTF-SN--HY-MSWVRQAPGKG
L-EWVSYISG---DSGYTNYADSVKGRFTISRDN---ANNSPYLQMNSLRAEDTAVYYCV
--------
>Vs1149-Homo_sapiens-ABBA01074088.1-ighv
-----VLSQVQLQES--GPGLVKPSGTLSLTCA-VSG-GSI-SS-SNW-WSWVRQPPGKG
L-EWIGEIYH-S-GS--TNYNPSLKSRVTISVDK---SKNQFSLKLSSVTAADTAVYYCA
R-------
>Vs1148-Homo_sapiens-ABBA01074086.1-ighv
-----VLSQVQLQQS--GPGLVKPSQTLSLTCA-ISG-DSV-SSNSAA-WNWIRQSPSRG
L-EWLGRTYY-R-SKWYNDYAVSVKSRITINPDT---SKNQFSLQLNSVTPEDTAVYYCA
R-------
>Vs349-Homo_sapiens-ABBA01040615.1-ighv
-----VQCEVQLVET--GGGLIQPGGSLRLSCA-ASG-FTV-SS--NY-MSWVRQAPGKG
L-EWVSVIY----SGGSTYYADSVKGRFTISRDN---SKNTLYLQMNSLRAEDTAVYYCA
R-------
>Vs348-Homo_sapiens-ABBA01040614.1-ighv
-----AHSQMQLVQS--GPEVKKPGTSVKVSCK-ASG-FTF-TS--SA-VQWVRQARGQR
L-EWIGWIVV-G--SGNTNYAQKFQERVTITRDM---STSTAYMELSSLRSEDTAVYYCA
A-------
>Vs51-Homo_sapiens-ABBA01007185.1-ighv
-----VQCEVQLEES--GGGLVQPGGSLRLSCA-ASG-FTF-SS--YW-MHWVRQSPGKG
L-VWVSRINS---DGSSTSYADSMKGQFTISRDN---AKNTLYLQMNSLRAEDMAVYYCT
R-------
>Vs341-Homo_sapiens-ABBA01040607.1-ighv
-----VQCEVQLVES--GGGLVQPGGSLRLSCA-ASG-FTF-SD--HY-MDWVRQAPGKG
L-EWVGRTRN-KANSYTTEYAASVKGRFTISRDD---SKNSLYLQMNSLKTEDTAVYYCA
R-------
>Vs340-Homo_sapiens-ABBA01040607.1-ighv
-----VQCEVQLVES--GGGLVQPGGSLKLSCA-ASG-FTF-SG--SA-MHWVRQASGKG
L-EWVGRIRS-KANSYATAYAASVKGRFTISRDD---SKNTAYLQMNSLKTEDTAVYYCT
--------
>Vs343-Homo_sapiens-ABBA01040608.1-ighv
-----VQSQVQLVQS--GAEVKKPGSSVKVSCK-ASG-GTF-SS--YA-ISWVRQAPGQG
L-EWMGGIIP-I--FGTANYAQKFQGRVTITADE---STSTAYMELSSLRSEDTAVYYCA
R-------
>Vs342-Homo_sapiens-ABBA01040608.1-ighv
-----VLSQVTLRES--GPALVKPTQTLTLTCT-FSG-FSL-STSGMC-VSWIRQPPGKA
L-EWLALIDW-D-DD--KYYSTSLKTRLTISKDT---SKNQVVLTMTNMDPVDTATYYCA
RI------
>Vs345-Homo_sapiens-ABBA01040613.1-ighv
-----VQCEVQLVES--GEGLVQPGGSLRLSCA-ASG-FTF-SS--YA-MHWVRQAPGKG
L-EYVSAISS---NGGSTYYADSVKGRFTISRDN---SKNTLYLQMGSLRAEDMAVYYCA
R-------
>Vs344-Homo_sapiens-ABBA01040613.1-ighv
-----VQCEVQLVES--GGGLIQPGGSLRLSCA-ASG-FTV-SS--NY-MSWVRQAPGKG
L-EWVSVIY----SCGSTYYADSVKGRFTISRDN---SKNTLYLQMNSLRAEDTAVYYCA
R-------
>Vs347-Homo_sapiens-ABBA01040614.1-ighv
-----VLSQVQLQES--GPGLVKPSETLSLTCT-VSG-GSI-S--SYY-WSWIRQPPGKG
L-EWIGYIYY-S-GS--TNYNPSLKSRVTISVDT---SKNQFSLKLSSVTAADTAVYYCA
R-------
>Vs346-Homo_sapiens-ABBA01040614.1-ighv
-----VLSQVQLQES--GPGLVKPSETLSLTCT-VSG-GSV-SSGSYY-WSWIRQPPGKG
L-EWIGYIYY-S-GS--TNYNPSLKSRVTISVDT---SKNQFSLKLSSVTAADTAVYYCA
R-------
>Vs1146-Homo_sapiens-ABBA01074086.1-ighv
-----VHSQVQLVQS--GAEVKKPGASVKVSCK-ASG-YTF-TS--YA-MHWVRQAPGQR
L-EWMGWSNA-G--NGNTKYSQEFQGRVTITRDT---SASTAYMELSSLRSEDTAVYYCA
R-------
>Vs1170-Homo_sapiens-ABBA01074102.1-ighv
-----VLSQVQLQQW--GAGLLKPSETLSLTCA-VYG-GSF-S--GYY-WSWIRQPPGKG
L-EWIGEINH-S-GS--TNYNPSLKSRVTISVDT---SKNQFSLKLSSVTAADTAVYYCA
R-------
>Vs630-Homo_sapiens-ABBA01098847.1-ighv
-----VLSQVQLQES--GPGLVKPSETLSLTCT-VSG-GSI-S--SYY-WSWIRQPAGKG
L-EWIGRIYT-S-GS--TNYNPSLKSRVTMSVDT---SKNQFSLKLSSVTAADTAVYYCA
R-------
>Vs1172-Homo_sapiens-ABBA01074103.1-ighv
-----VQCEVQLVES--GGGLVQPRGSLRLSCA-ASG-FTV-SS--NE-MSWIRQAPGKG
L-EWVSSI-----SGGSTYYADSRKGRFTISRDN---SKNTLYLQMNNLRAEGTAVYYCA
RY------
>Vs425-Homo_sapiens-ABBA01050774.1-ighv
-----VQCQVQLVES--GGGLVKPGGSLRLSCA-ASG-FTF-SD--YY-MSWIRQAPGKG
L-EWVSYISS---SSSYTNYADSVKGRFTISRDN---AKNSLYLQMNSLRAEDTAVYYCA
R-------
>Vs426-Homo_sapiens-ABBA01050775.1-ighv
-----VCAEVQLVQS--GAEVKKPGESLRISCK-GSG-YSF-TS--YW-ISWVRQMPGKG
L-EWMGRIDP-S--DSYTNYSPSFQGHVTISADK---SISTAYLQWSSLKASDTAMYYCA
--------
>Vs427-Homo_sapiens-ABBA01050780.1-ighv
-----VQCEVQLVES--GGGLVQPGGSLRLSCS-ASG-FTF-SS--YA-MHWVRQAPGKG
L-EYVSAISS---NGGSTYYADSVKGRFTISRDN---SKNTLYLQMSSLRAEDTAVYYCV
K-------
>Vs352-Homo_sapiens-ABBA01040616.1-ighv
-----VQCEVQLVES--GGGLVQPGGSLRLSCA-ASG-FTF-SS--YS-MNWVRQAPGKG
L-EWVSYISS---SSSTIYYADSVKGRFTISRDN---AKNSLYLQMNSLRDEDTAVYYCA
R-------
>Vs353-Homo_sapiens-ABBA01040616.1-ighv
-----VQCEDQLVES--GGGLVQPGGSLRPSCA-ASG-FAF-SS--YV-LHWVRRAPGKG
P-EWVSAIG----TGGDTYYADSVMGRFTISRDN---AKKSLYLQMNSLIAEDMAVYYCA
R-------
>Vs350-Homo_sapiens-ABBA01040615.1-ighv
-----VCAEVQLVQS--GAEVKKPGESLKISCK-GSG-YSF-TS--YW-IGWVRQMPGKG
L-EWMGIIYP-G--DSDTRYSPSFQGQVTISADK---SISTAYLQWSSLKASDTAMYYCA
--------
>Vs351-Homo_sapiens-ABBA01040616.1-ighv
-----VQCEVQLVES--GGGLVKPGRSLRLSCT-ASG-FTF-GD--YA-MSWFRQAPGKG
L-EWVGFIRS-KAYGGTTEYAASVKGRFTISRDD---SKSIAYLQMNSLKTEDTAVYYCT
R-------
>Vs356-Homo_sapiens-ABBA01040618.1-ighv
-----VQCEVQLVES--GGVVVQPGGSLRLSCA-ASG-FTF-DD--YA-MHWVRQAPGKG
L-EWVSLISW---DGGSTYYADSVKGRFTISRDN---SKNSLYLQMNSLRAEDTALYYCA
KD------
>Vs354-Homo_sapiens-ABBA01040616.1-ighv
-----AHSQVQLVQS--GAEVKKPGASVKVSCK-ASG-YTF-TS--YY-MHWVRQAPGQG
L-EWMGIINP-S--GGSTSYAQKFQGRVTMTRDT---STSTVYMELSSLRSEDTAVYYCA
R-------
>Vs355-Homo_sapiens-ABBA01040616.1-ighv
-----AYSQMQLVQS--GAEVKKTGSSVKVSCK-ASG-YTF-TY--RY-LHWVRQAPGQA
L-EWMGWITP-F--NGNTNYAQKFQDRVTITRDR---SMSTAYMELSSLRSEDTAMYYCA
R-------
>Vs809-Mus_m2-120129022-ighv
-----VLSQVQLKQS--GPGLVQPSQSLSITCT-VSG-FSL-TS--YG-VHWVRQPPGKG
L-EWLGVIWS-G-GS--TDYNAAFISRLSISKDN---SKSQVFFKMNSLQADDTAIYYCA
K-------
>Vs814-Mus_m2-120129022-ighv
-----VQCEVQLVES--GGGLVQPGESLKLSCE-SNE-YEF-PS--HD-MSWVRKTPEKR
L-ELVAAINS---DGGSTYYPDTMERRFIISRDN---TKKTLYLQMSSLRSEDTALYYCA
--------
>Vs811-Mus_m2-120129022-ighv
-----VLSQVQLKES--GPGLVAPSQSLSITCT-VSG-FSL-TS--YG-VSWVRQPPGKG
L-EWLGVIWG-D-GS--TNYHSALISRLSISKDN---SKSQVFLKLNSLQTDDTATYYCA
K-------
>Vs810-Mus_m2-120129022-ighv
-----VQCEVQLVES--GGDLVKPGGSLKLSCA-ASG-FTF-SS--YG-MSWVRQTPDKR
L-EWVATISS---GGSYTYYPDSVKGRFTISRDN---AKNTLYLQMSSLKSEDTAMYYCA
--------
>Vs813-Mus_m2-120129022-ighv
-----VLSQVQLKQS--GPGLVQPSQSLSITCT-VSG-FSL-TS--YG-VHWVRQSPGKG
L-EWLGVIWS-G-GS--TDYNAAFISRLSISKDN---SKSQVFFKMNSLQADDTAIYYCA
R-------
>Vs812-Mus_m2-120129022-ighv
-----VQCEVQLVES--GGGLVKPGGSLKLSCA-ASG-FTF-SS--YA-MSWVRQTPEKR
L-EWVATISD---GGSYTYYPDNVKGRFTISRDN---AKNNLYLQMSHLKSEDTAMYYCA
R-------
>Vs789-Mus_m2-120129022-ighv
-----VNSEVQLQQS--GAELVKPGASVKLSCT-ASG-FNI-KD--YY-MHWVKQRTEQG
L-EWIGRIDP-E--DGETKYAPKFQGKATITADT---SSNTAYLQLSSLTSEDTAVYYCA
--------
>Vs788-Mus_m2-120129022-ighv
-----VQCEVQLLET--GGGLVQPGGSRGLSCE-GSG-FTF-SG--FW-MSWVRQTPGKT
L-EWIGDINS---DGSAINYAPSIKDRFTIFRDN---DKSTLYLQMSNVRSEDTATYFCM
R-------
>Vs781-Mus_m2-120129022-ighv
-----IQCEVKLVES--GGGLVQPGGSLSLSCA-ASG-FTF-TD--YY-MSWVRQPPGKA
L-EWLGFIRN-KANGYTTEYSASVKGRFTISRDN---SQSILYLQMNALRAEDSATYYCA
RY------
>Vs780-Mus_m2-120129022-ighv
-----VNSEVQLQQS--GAELVRPGASVKLSCT-ASG-FNI-KD--DY-MHWVKQRPEQG
L-EWIGWIDP-E--NGDTEYASKFQGKATITADT---SSNTAYLQLSSLTSEDTAVYYCT
--------
>Vs783-Mus_m2-120129022-ighv
-----AQAQIQFVQS--GPELKKPGETVKISCK-ASV-YTF-TE--YP-MHWVKQAPGKG
F-KWMGWINT-Y--SGEPTYADDFKGRFAFSLET---SASTAYLQINNLKNEDTATYFCA
--------
>Vs782-Mus_m2-120129022-ighv
-----AQAQIQLVQS--GPELKKPGETVKISCK-ASG-YTF-TT--YG-MSWVKQAPGKG
L-KWMGWINT-Y--SGVPTYADDFKGRFAFSLET---SASTAYLQINNLKNEDTATYFCA
--------
>Vs785-Mus_m2-120129022-ighv
-----AQAQIQLVQS--GPELKKPGETVKISCK-ASG-YTF-TE--YP-MHWVKQAPGKG
F-KWMGMIYT-D--TGEPTYAEEFKGRFAFSLET---SASTAYLQINNLKNEDTATYFCV
--------
>Vs784-Mus_m2-120129022-ighv
------------------SALIKPSQPLSLTCT-VSG-FSI-TSSSYC-WHWICQPPGKG
L-EWMGHICY-E-GS--LNYSPSLKSRSTISRDT---SLNKFFIQLSSLTDEDTVMYYCS
RE------
>Vs787-Mus_m2-120129022-ighv
-----VNSEVQLQQS--VAELVRPGASVKLSCT-ASG-FNI-KN--TY-MHWVKQRPEQG
L-EWIGRIDP-A--NGNTKYAPKFQGKATITADT---SSNTAYLQLSSLTSEDTAIYYCA
--------
>Vs786-Mus_m2-120129022-ighv
-----IQGEVQLVES--GGSLGQPGGSTKLSCEEASG-FTF-SD--HW-MDWFRQAPGMR
L-EWLANTNH---DESGKGYAESVKDRFSISRDN---SENLLYLQMNSLRNEDTALYYCA
R-------
>Vs774-Mus_m2-120129022-ighv
-----ILSDVQLQES--GPGLVKPSQSLSLTCS-VTG-YSI-TSG-YY-WNWIRQFPGNK
L-EWMGYISY-D-GS--NNYNPSLKNRISITRDT---SKNQFFLKLNSVTTEDTATYYCA
R-------
>Vs775-Mus_m2-120129022-ighv
-----IHCEVQLVET--GGGLVQPGNSLKLSCA-TSG-YPF-YD--YW-MDWVRHSPEKG
L-EWVARIAT-KTHNYATYYAESVKGRFIVSRDD---SKSSAYMQMNSLRKEDTAVYYCA
RE------
>Vs776-Mus_m2-120129022-ighv
-----ILSDVQLQES--GPGLVKPSQTVFLTCT-VTG-ISI-TTGNYR-WSWIRQFPGNK
L-EWIGYIYY-S-GT--ITYNPSLTSRTTITRDT---PKNQFFLEMNSLTAEDTATYYCA
R-------
>Vs777-Mus_m2-120129022-ighv
-----ILSDVQLQES--GPALVKPSQTVSLTCT-VTG-YSI-TNGNHW-WNWIRQVSGSK
L-EWIGYISS-S-GS--TDSNPSLKSRISITRDT---SKNQLFLQLNSVTTEDIATYYCA
R-------
>Vs770-Mus_m2-120129022-ighv
-----SLSQMQLQES--GPGLVKPSQSLFLTCS-ITG-FPI-TSG-YY-WIWIRQSPGKP
L-EWMGYITH-S-GE--TFYNPSLQSPISITRET---SKNQFFLQLNSVTTEDTAMYYCA
GD------
>Vs771-Mus_m2-120129022-ighv
-----VQCQVQLVET--GGGLVRPGNSLKLSCV-TSG-FTF-SN--YR-MHWLRQPPGKR
L-EWIAVITV-KSDNYGANYAESVKGRFAISRDD---SKSSVYLEMNRLREEDTATYFCS
--------
>Vs772-Mus_m2-120129022-ighv
-----ILSEVQLQES--GPGLAKPSQTLSLTCS-VTG-YSI-TSD--Y-WNWIRKFPGNK
L-EYMGYISY-S-GS--TYYNPSLKSRISITRDT---SKNQYYLQLNSVTTEDTATYYCA
R-------
>Vs773-Mus_m2-120129022-ighv
-----IQAQIQLVQS--GPELKKPGETVKISCK-ASG-YTF-TT--AG-MQWVQKMPGKG
F-KWIGWINT-H--SGEPKYAEDFKGRFAFSLET---SASTAYLQISNLKNEDTATYFCA
--------
>Vs778-Mus_m2-120129022-ighv
-----IQCEVKLMES--GGGLVQPGASLRLSCA-ASG-FTF-TD--YY-MSWVRQPPGKA
P-EWLALIRN-KANGYTTEYTASVKGRFTISRDN---SQNILYLQMNTLRAEDSATYYCV
KA------
>Vs779-Mus_m2-120129022-ighv
-----ILSDVQLQES--GPSLVRPSQTLSLTCT-VTG-FSI-NSD-CY-WIWIRQFPGNK
L-EYIGYTFY-S-GI--TYYNPSLESRTYITRDT---SKNQFSLKLSSVTTEDTATYYCA
R-------
>Vs738-Mus_m2-120129022-ighv
-----VLSQVTLKES--GPGILQPSQTLSLTCS-FSG-FSL-STSNMG-IGWIRQPSGKG
L-EWLAHIWW-N-DD--KYYNPSLKSRLTISKDT---SNNQVFLKITSVDTADTATYYCA
QI------
>Vs739-Mus_m2-120129022-ighv
-----VHSQRELQQS--GAELVRPGSSVKLSCK-DSY-FAF-MA--SA-MHWVKQRPGHG
L-EWIGSFTM-Y--SDATEYSENFKGKATLTANT---SSSTAYMELSSLTSEDSAVYYCA
--------
>Vs730-Mus_m2-120129022-ighv
-----VLSQVTLKES--GPGILQPSQTLSLTCS-FSG-FSL-STFGMG-VGWIRQPSGKG
L-EWLAHIWW-D-DD--KYYNPALKSRLTISKDT---SKNQVFLKIANVDTADTATYYCA
RI------
>Vs731-Mus_m2-120129022-ighv
-----VHCQVQLQQS--GPELVRPGASVKISCK-APG-YTF-TS--HW-MQWVRQRPGQG
L-EWIGEIFP-G--SGSTYYNEKFKGKATLTVDT---SSSTAYMQLSSLTSEDSAVYFCA
--------
>Vs732-Mus_m2-120129022-ighv
-----VHSQVQLQQP--GAELVKPGASVKMSCK-ASG-YTF-TS--YW-ITWVKQRPGQG
L-EWIGDIYP-G--SGSTNYNEKFKSKATLTVDT---SSSTAYMQLSSLTSEDSAVYYCA
--------
>Vs733-Mus_m2-120129022-ighv
-----VHSQVQLQQS--GAELVRPGTSVKVSCK-ASG-YAF-TN--YL-IEWVKQRPGQG
L-EWIGVINP-G--SGGTNYNEKFKGKATLTADK---SSSTAYMQLSSLTSEDSAVYFCA
--------
>Vs734-Mus_m2-120129022-ighv
-----VLSQVTLKES--GPGILQPSQTLSLTCS-FSG-FSL-STFGMG-VSWIRQPSGKD
L-EWLAHIYW-D-DD--KHYNPSLKSQLRISKDT---SNNQVFLKITTVDTVDTATYYCA
RR------
>Vs735-Mus_m2-120129022-ighv
-----VHSQVQLQQP--GTELVKPGASVKLSCK-ASG-YTF-TS--YW-MHWVKQRPGQG
L-EWIGNINP-S--NGGTNYNEKFKSKATLTVDK---SSSTAYMQLSSLTSEDSAVYYCA
--------
>Vs736-Mus_m2-120129022-ighv
-----VHSQVQLQQP--GAELVRPGSSVKLSCK-ASG-YTF-TS--YW-MHWVKQRPIQG
L-EWIGNIDP-S--DSETHYNQKFKDKATLTVDK---SSSTAYMQLSSLTSEDSAVYYCA
--------
>Vs737-Mus_m2-120129022-ighv
-----VHSQVQLQQP--GAELVKPGASVKLSCK-ASG-YTF-TS--YW-MQWVKQRPGQG
L-EWIGEIDP-S--DSYTNYNQKFKGKATLTVDT---SSSTAYMQLSSLTSEDSAVYYCA
--------
>Vs749-Mus_m2-120129022-ighv
-----VLSEVQLQQS--GPELVKPGASVKISCK-ASG-YTF-TD--YY-MNWVKQSHGKS
L-EWIGDINP-N--NGGTSYNQKFKGKATLTVDK---SSSTAYMELRSLTSEDSAVYYCA
--------
>Vs748-Mus_m2-120129022-ighv
-----VHSEVQLQQS--GPELVKPGASVKISCK-ASG-YSF-TG--YY-MHWVKQSHGNI
L-DWIGYIYP-Y--NGVSSYNQKFKGKATLTVDK---SSSTAYMELRSLTSEDSAVYYCA
--------
>Vs745-Mus_m2-120129022-ighv
-----VFSEVQLQQS--GPELVKPGASVKISCK-ASG-YSF-TG--YF-MNWVKQSHGKS
L-EWIGRINP-Y--NGDTFYNQKFKGKATLTVDK---SSSTAHMELLSLTSEDFAVYYCA
--------
>Vs744-Mus_m2-120129022-ighv
-----VHSEFQLQQS--GPELVKPGASVKISCK-ASG-YSF-TD--YN-MNWVKQSNGKS
L-EWIGVINP-N--YGTTSYNQKFKGKATLTVDQ---SSSTAYMQLNSLTSEDSAVYYCA
--------
>Vs747-Mus_m2-120129022-ighv
-----VLSEVQLQQS--GPELVKPGASVKMSCK-ASG-YTF-TD--YY-MHWVKQSHGKS
L-EWIGYIYP-N--NGGNGYNQKFKGKATLTVDK---SSSTAYMELRSLTSEDSAVYYCA
--------
>Vs746-Mus_m2-120129022-ighv
-----VLSEVQLQQS--GPVLVKPGPSVKISCK-ASG-FTF-TD--YY-MHWVKQSHGKS
L-EWIGLVYP-Y--NGGTSYNQKFKGKATLTVDT---SSSTAYMELNSLTSEDSAVYYCA
--------
>Vs741-Mus_m2-120129022-ighv
-----VHSQVQLQQS--GAELVKPGASVKMSCK-ASG-YTF-TT--YP-IEWMKQNHGKS
L-EWIGNFHP-Y--NDDTKYNEKFKGKATLTVEK---SSSTVYLELSRLTSDDSAVYYCA
--------
>Vs740-Mus_m2-120129022-ighv
-----VLSQITLKQS--GPGIVQPSQPVRLTCT-FSG-FSL-STSGIG-VTWIRQPSGKG
L-EWLATIWW-D-DD--NRYNPSLKSRLAVSKDT---SNNQAFLNIITVETADTAIYYCA
QS------
>Vs743-Mus_m2-120129022-ighv
-----VHSEVQLQQS--GPELVKPGASVKISCK-ASG-YSF-TG--YY-MNWVKQSPEKS
L-EWIGEINP-S--TGGTTYNQKFKAKATLTVDK---SSSTAYMQLKSLTSEDSAVYYCA
--------
>Vs742-Mus_m2-120129022-ighv
-----VHSEVKLQQS--GPELVKPGASVKISCK-ASG-YSF-TG--YY-MHWVKQSSEKS
L-EWIGEINP-S--TGGTSYNQKFKGKATLTVDK---SSSTAYMQLKSLTSEDSAVYYCA
--------
>Vs806-Mus_m2-120129022-ighv
-----VQCEVKLVES--GGGLVQPGGSLKLSCA-ASG-FTF-SD--YY-MYWVRQTPEKR
L-EWVAYISN---GGGSTYYPDTVKGRFTISRDN---AKNTLYLQMSRLKSEDTAMYYCA
--------
>Vs807-Mus_m2-120129022-ighv
-----VLSQVQLKQS--GPGLVQPSQSLSITCT-VSG-FSL-TS--YG-VHWVRQSPGKG
L-EWLGVIWR-G-GS--TDYNAAFMSRLSITKDN---SKSQVFFKMNSLQADDTAIYYCA
K-------
>Vs804-Mus_m2-120129022-ighv
-----VQCDVKLVES--GEGLVKPGGSLKLSCA-ASG-FTF-SS--YA-MSWVRQTPEKR
L-EWVAYISS---GGDYIYYADTVKGRFTISRDN---ARNTLYLQMSSLKSEDTAMYYCT
R-------
>Vs802-Mus_m2-120129022-ighv
-----ALSQVQLKES--GPGLVAPSQSLSITCT-VSG-FSL-TS--YA-ISWVRQPPGKG
L-EWLGVIWT-G-GG--TNYNSALKSRLSISKDN---SKSQVFLKMNSLQTDDTARYYCA
R-------
>Vs803-Mus_m2-120129022-ighv
-----VQCEVKLVES--GGGLVKPGQSLKLSCA-ASG-FTF-SN--YY-MSWVHQTPEKR
L-EWVAYISS---SGVSTYYPDNVKGRFAISRDN---AKNTLYLQMTSLKSEDTALYYCA
R-------
>Vs800-Mus_m2-120129022-ighv
-----VLSQVQMKES--GPDLVQPSQTLSLTCT-VSG-FSL-SS--YG-VHWFRKPPRKG
L-EWLGGIWS-G-GS--IYYTPALSSRLSVSRDT---SKSQVFFKMSSLQSEDTAVYHCA
R-------
>Vs801-Mus_m2-120129022-ighv
-----ILSQVQLKES--GPGLVAPSQSLSITCT-VSG-FSL-TS--YG-VDWVRQSPGKG
L-EWLGVIWG-V-GS--TNYNSALKSRLSISKDN---SKSQVFLKMNSLQTDDTAMYYCA
S-------
>Vs808-Mus_m2-120129022-ighv
-----VQCEVMLVES--GGGLVKPGGSLKLSCA-ASG-FTF-SS--YT-MSWVRQTPEKR
L-EWVATISG---GGGNTYYPDSVKGRFTISRDN---AKNTLYLQMSSLRSEDTALYYCA
--------
>Vs798-Mus_m2-120129022-ighv
-----VQCEVKLVES--EGGLVQPGSSMKLSCT-ASG-FTF-SD--YY-MAWVRQVPEKG
L-EWVANINY---DGSSTYYLDSLKSRFIISRDN---AKNILYLQMSSLKSEDTATYYCA
R-------
>Vs799-Mus_m2-120129022-ighv
-----VQCEVKLVES--GGGLVQPGGSLKLSCA-ASG-FTF-SD--YG-MAWVRQAPRKG
P-EWVAFISN---LAYSIYYADTVTGRFTISREN---AKNTLYLEMSSLRSEDTAMYYCA
--------
>Vs792-Mus_m2-120129022-ighv
-----VQCEVKLLQS--GGGLVQPGGSLKLSCA-ASG-IDF-SR--YW-MSWVRRAPGKG
L-EWIGEINP---DSSTINYAPSLKDKFIISRDN---AKNTLYLQMSKVRSEDTALYYCA
R-------
>Vs793-Mus_m2-120129022-ighv
-----VNSEVQLQQS--GAELVRPGASVKLSCT-ASG-FNI-KD--YY-MHWVKQRPEQG
L-EWIGRIDP-E--DGDTEYAPKFQGKATMTADT---SSNTAYLQLSSLTSEDTAVYYCT
--------
>Vs790-Mus_m2-120129022-ighv
-----VQCEVQLLET--GEGLVPPGGSRGLSCE-GSG-FTF-SG--FW-MSWVRQTPGKT
L-EWIGDINS---DGSAINYAPSIKDRFTIFRDN---DKSTLYLQMSNVRSEDTATYFCM
R-------
>Vs791-Mus_m2-120129022-ighv
-----ILSDVQLQES--GPGMVKPSQSLSLTCT-VTG-YSI-TSG-YD-WHWIRHFPGNK
L-EWMGYISY-S-GS--TNYNPSLKSRISITHDT---SKNHFFLKLNSVTTEDTATYYCA
R-------
>Vs796-Mus_m2-120129022-ighv
-----VLSQVQLKES--GPGLVAPSQSLSITCT-VSG-FSL-TS--YG-VDWVRQPPGKG
L-EWLGVIWG-G-GS--TNYNSALMSRLSISKDN---SKSQVFLKMNSLQTDDTAMYYCA
--------
>Vs797-Mus_m2-120129022-ighv
-----VQCEVQLVES--GGGLVKPGGSLKLSCA-ASG-FTF-SD--YG-MHWVRQAPEKG
L-EWVAYISS---GSSTIYYADTVKGRFTISRDN---AKNTLFLQMTSLRSEDTAMYYCA
--------
>Vs794-Mus_m2-120129022-ighv
-----IQCEVKLVES--EGGLVQPGGSLRLSCA-TSG-FTF-TD--FY-MNWVCQPPRKA
L-EWLGFIRN-KANGYTTDYSASMKGRFTISRDN---SQSILYLQMNTLRTEDSATYYCA
RD------
>Vs795-Mus_m2-120129022-ighv
-----IQCEVKLVES--GGGLVQSGRSLRLSCA-TSG-FTF-SD--FY-MEWVRQAPGKG
L-EWIAASRN-KANDYTTEYSASVKGRFIVSRDT---SQSILYLQMNALRAEDTAIYYCA
RD------
>Vs707-Mus_m2-120129022-ighv
-----VHCQIQLQQS--GPELVKPGASVKISCK-ASG-YTF-TD--YY-INWVKQRPGQG
L-EWIGWIYP-G--SGNTKYNEKFKGKATLTVDT---SSSTAYMQLSSLTSEDSAVYFCA
--------
>Vs706-Mus_m2-120129022-ighv
-----VHSQVQLQQS--GPELVKPGASVKLSCK-ASG-YTF-TS--YD-INWVKQRPGQG
L-EWIGWIYP-R--DGSTKYNEKFKGKATLTVDT---SSSTAYMELHSLTSEDSAVYFCA
--------
>Vs709-Mus_m2-120129022-ighv
-----VQSQVQLQQS--GAELARPGASVKLSCK-ASG-YTF-TS--YG-ISWVKQRTGQG
L-EWIGEIYP-R--SGNTYYNEKFKGKATLTADK---SSSTAYMELRSLTSEDSAVYFCA
--------
>Vs708-Mus_m2-120129022-ighv
-----VHSQVQLQQS--GPELVKPGASVKISCK-ASG-YAF-SS--SW-MNWVKQRPGKG
L-EWIGRIYP-G--DGDTNYNGKFKGKATLTADK---SSSTAYMQLSSLTSEDSAVYFCA
--------
>Vs758-Mus_m2-120129022-ighv
-----VHSQVQLQQS--GAELMKPGASVKLSCK-ATG-YTF-TG--YW-IEWVKQRPGHG
L-EWIGEILP-G--SGSTNYNEKFKGKATFTADT---SSNTAYMQLSSLTTEDSAIYYCA
--------
>Vs759-Mus_m2-120129022-ighv
----GIQSQVHLQQS--GSELRSPGSSVKLSCK-DFDSEVF-PI--AY-MSWVRQKPGHG
F-EWIGGILP-S--IGRTIYGEKFEDKATLDADT---LSNTAYLELNSLTSEDSAIYYCA
--------
>Vs756-Mus_m2-120129022-ighv
-----VHSQAYLQQS--GAELVRPGASVKMSCK-ASG-YTF-TS--YN-MHWVKQTPRQG
L-EWIGAIYP-G--NGDTSYNQKFKGKATLTVDK---SSSTAYMQLSSLTSEDSAVYFCA
--------
>Vs757-Mus_m2-120129022-ighv
-----AYSQIQLQQS--GAELASPGASVTLSCK-ASG-YTF-TD--HI-MNWVKKRPGQG
L-EWIGRIYP-V--SGETNYNQKFMGKATFSVDR---SSSTVYMVLNSLTSEDPAVYYCG
--------
>Vs754-Mus_m2-120129022-ighv
-----VQSQVQLQQS--GAELVRPGASVTLSCK-ASG-YTF-TD--YE-MHWVKQTPVHG
L-EWIGAIDP-E--TGGTAYNQKFKGKAILTADK---SSSTAYMELRSLTSEDSAVYYCT
--------
>Vs755-Mus_m2-120129022-ighv
-----VHSEFQLQQS--GPELVKPGASVKMSCK-ASG-YTF-TS--YV-MHWVKQKPGQG
L-EWIGYIYP-Y--NDGTKYNEKFKGKATLTSDK---SSSTAYMELSSLTSEDSAVYYCA
--------
>Vs752-Mus_m2-120129022-ighv
-----VHSEVQLQQS--GPVLVKPGASVKMSCK-ASG-YTF-TD--YY-MNWVKQSHGKS
L-EWIGVINP-Y--NGGTSYNQKFKGKATLTVDK---SSSTAYMELNSLTSEDSAVYYCA
--------
>Vs753-Mus_m2-120129022-ighv
-----VLSEVQLQQS--GPELVKPGASVKIPCK-ASG-YTF-TD--YN-MDWVKQSHGKS
L-EWIGDINP-N--NGGTIYNQKFKGKATLTVDK---SSSTAYMELRSLTSEDTAVYYCA
--------
>Vs750-Mus_m2-120129022-ighv
-----VLSEVQLQQS--GPELVKPGASVKMSCK-ASG-YTF-TD--YN-MHWVKQSHGKS
L-EWIGYINP-N--NGGTSYNQKFKGKATLTVNK---SSSTAYMELRSLTSEDSAVYYCA
--------
>Vs751-Mus_m2-120129022-ighv
-----VFSEVQLQQS--GPELVKPGDSVKISCK-ASG-YSF-TG--YF-MNWVMQSHGKS
L-EWIGRINP-Y--NGDTFYNQKFKGKATLTVDK---SSSTAHMELRSLTSEDSAVYYCA
--------
>Vs712-Mus_m2-120129022-ighv
-----VHCQVQLKQS--GAELVKPGASVKISCK-ASG-YTF-TD--YY-INWVKQRPGQG
L-EWIGKIGP-G--SGSTYYNEKFKGKATLTADK---SSSTAYMQLSSLTSEDSAVYFCA
--------
>Vs713-Mus_m2-120129022-ighv
-----VHCQVQLKQS--GAELVRPGASVKLSCK-ASG-YTF-TD--YY-INWVKQRPGQG
L-EWIARIYP-G--SGNTYYNEKFKGKATLTAEK---SSSTAYMQLSSLTSEDSAVYFCA
--------
>Vs710-Mus_m2-120129022-ighv
-----VQSQVQLQQS--GAELVKPGASVKISCK-ASG-YAF-SS--YW-MNWVKQRPGKG
L-EWIGQIYP-G--DGDTNYNGKFKGKATLTADK---SSSTAYMQLSSLTSEDSAVYFCA
--------
>Vs711-Mus_m2-120129022-ighv
-----VHSQVQLQQS--DAELVKPGASVKISCK-VSG-YTF-TD--HT-IHWMKQRPEQG
L-EWIGYIYP-R--DGSTKYNEKFKGKATLTADK---SSSTAYMQLNSLTSEDSAVYFCA
--------
>Vs716-Mus_m2-120129022-ighv
-----VHSQVQLQQP--GAELVKPGASVKLSCK-ASG-YTF-TS--YW-MHWVKQRPGRG
L-EWIGRIDP-N--SGGTKYNEKFKSKATLTVDK---PSSTAYMQLSSLTSEDSAVYYCA
--------
>Vs717-Mus_m2-120129022-ighv
-----VHSQVQLQQS--GAELVKPGASVKLSCK-ASG-YTF-TE--YT-IHWVKQRSGQG
L-EWIGWFYP-G--SGSIKYNEKFKDKATLTADK---SSSTVYMELSRLTSEDSAVYFCA
--------
>Vs714-Mus_m2-120129022-ighv
-----VHCQVQLQQS--GPELVKPGASVKISCK-ASG-YTF-TD--YY-INWVKQRPGQG
L-EWIGWIFP-G--SGSTYYNEKFKGKATLTVDK---SSSTAYMLLSSLTSEDSAVYFCA
--------
>Vs715-Mus_m2-120129022-ighv
-----VHSQVQLQQP--GAELVKPGASVKVSCK-ASG-YTF-TS--YW-MHWVKQRPGQG
L-EWIGRIHP-S--DSDTNYNQKFKGKATLTVDK---SSSTAYMQLSSLTSEDSAVYYCA
--------
>Vs718-Mus_m2-120129022-ighv
-----VLSQVTLKES--GPGILQSSQTLSLTCS-FSG-FSL-STSGMG-VSWIRQPSGKG
L-EWLAHIYW-D-DD--KRYNPSLKSRLTISKDT---SRNQVFLKITSVDTADTATYYCA
RR------
>Vs719-Mus_m2-120129022-ighv
-----VHSQVQLQQP--GAELVMPGASVKLSCK-ASG-YTF-TS--YW-MHWVKQRPGQG
L-EWIGEIDP-S--DSYTNYNQKFKGKSTLTVDK---SSSTAYMQLSSLTSEDSAVYYCA
--------
>Vs769-Mus_m2-120129022-ighv
-----VQSEVKLEES--GGGLVQPGGSMKLSCV-ASG-FTF-SN--YW-MNWVRQSPEKG
L-EWVAQIRL-KSDNYATHYAESVKGRFTISRDD---SKSSVYLQMNNLRAEDTGIYYCT
--------
>Vs768-Mus_m2-120129022-ighv
-----VQSDVNLEVS--GGGLVKPGGSMQLFCV-ASG-FTF-VD--GW-MDWVRQSPEKG
L-EWVAEIAN-KANNYATYYPESVKGRFTISRDD---FKSSVYLHMNSLRAEDTGIYYCT
--------
>Vs763-Mus_m2-120129022-ighv
-----VHSQVQLQQS--GAELARPGASVKMSCK-ASG-YTF-TS--YT-MHWVKQRPGQG
L-EWIGYINP-S--SGYTKYNQKFKDKATLTADK---SSSTAYMQLSSLTSEDSAVYYCA
--------
>Vs762-Mus_m2-120129022-ighv
-----VYSEVQLQQS--GTVLARPGASVKMSCK-TSG-YTF-TS--YW-MHWVKQRPGQG
L-EWIGAIYP-G--NSDTSYNQKFKGKAKLTAVT---SASTAYMELSSLTNEDSAVYYCT
--------
>Vs761-Mus_m2-120129022-ighv
-----VHCEVQLVES--GGGLVQPKGSLKLSCA-ASG-FTF-NT--YA-MHWVRQAPGKG
L-EWVARIRS-KSSNYATYYADSVKDRFTISRDD---SQSMLYLQMNNLKTEDTAMYYCV
R-------
>Vs760-Mus_m2-120129022-ighv
-----VHSQVQLQQS--GAELAKPGASVKLSCK-ASG-YTF-TS--YW-MHWVKQRPGQG
L-EWIGYINP-S--SGYTKYNQKFKDKATLTADK---SSSTAYMQLSSLTYEDSAVYYCA
--------
>Vs767-Mus_m2-120129022-ighv
-----VQSEVKIEES--GGGLVQPGGSMKLSCA-ASG-FTF-SD--YR-MDWVHHSTENG
L-EWVAEIRN-KASNYATYYVESVNGRFTISRDD---SKSSVYLQMNSLRAEDTGIYYCT
--------
>Vs766-Mus_m2-120129022-ighv
-----VQSEVKLEES--GGGLVQPGGSMKLSCA-ASG-FTF-SD--AW-MDWVRQSPEKG
L-EWVAEIRN-KANNHATYYAESVKGRFTISRDD---SKSSVYLQMNSLRAEDTGIYYCT
--------
>Vs765-Mus_m2-120129022-ighv
-----VQCEEKLDES--GGGLVQPGRSMKLSCV-ASG-FTF-TN--SW-MNWFCQSPEKG
L-EWVAQIKS-KPYNYETYYSDSVKGRFTISRDD---SKSSVYLQMNNLRAEDTGIYYCT
--------
>Vs764-Mus_m2-120129022-ighv
-----VHCEVQLVES--GGGLVQPKGSLKLSCA-ASG-FSF-NT--YA-MNWVRQAPGKG
L-EWVARIRS-KSNNYATYYADSVKDRFTISRDD---SESMLYLQMNNLKTEDTAMYYCV
--------
>Vs729-Mus_m2-120129022-ighv
-----VHSEVQLQQS--GAELVRPGSSVKMSCK-TSG-YTF-TS--YG-INWVKQRPGQG
L-EWIGYIYI-G--NGYTEYNEKFKGKATLTSDT---SSSTAYMQLSSLTSEDSAIYFCA
--------
>Vs728-Mus_m2-120129022-ighv
-----VHSQVQLQQP--GAELVRPGTSVKLSCK-ASG-YTF-TS--YW-MHWVKQRPGQG
L-EWIGVIDP-S--DSYTNYNQKFKGKATLTVDT---SSSTAYMQLSSLTSEDSAVYYCA
--------
>Vs727-Mus_m2-120129022-ighv
-----VHSQVQLQQP--GAELVRPGSSVKLSCK-ASG-YTF-TS--YW-MDWVKQRPGQG
L-EWIGNIYP-S--DSETHYNQKFKDKATLTVDK---SSSTAYMQLSSLTSEDSAVYYCA
--------
>Vs726-Mus_m2-120129022-ighv
-----VHCQVQLQQS--GAELVRPGASVKLSCK-ASG-YTF-TS--YW-MQWVKQRPGQG
L-EWIGEIFP-G--SGSTYYNEKFKGKATLTVDT---SSSTAYMQLSSLTAENSAIYLCK
EQCC----
>Vs725-Mus_m2-120129022-ighv
-----VHSQVQLQQS--GAELVKPGASVKLSCK-ASG-YTF-TE--YT-IHWVKQRSGQG
L-EWIGWFYP-G--SGSIKYNEKFKDKATLTADK---SSSTVYMELSRLTSEDSAVYFCA
--------
>Vs724-Mus_m2-120129022-ighv
-----VHSQVQLQQS--GAELVRPGTSVKMSCK-ASG-YTF-TN--YW-IGWAKQRPGHG
L-EWIGDIYP-G--GGYTNYNEKFKGKATLTADK---SSSTAYMQFSSLTSEDSAIYYCA
--------
>Vs723-Mus_m2-120129022-ighv
-----VHSQVQLQQP--GAELVKPGASVKLSCK-ASG-YTF-TS--YW-MHWVKQRPGQG
L-EWIGMIHP-N--SGSTNYNEKFKSKATLTVDK---SSSTAYMQLSSLTSEDSAVYYCA
--------
>Vs722-Mus_m2-120129022-ighv
-----VLSQITQKES--GPGILQPSQTLSLTCS-FSG-FSL-STSGMG-VGWIHQPSGNG
L-EWLAHIWW-N-DN--KYYNTALKSRLTISKDT---SNNQVFLKIASVDTADTATYYCA
RI------
>Vs721-Mus_m2-120129022-ighv
-----VHCQVQLQQS--GPELVKPGASVKISCK-ASG-YSF-TS--YY-IHWVKQRPGQG
L-EWIGWIYP-G--SGNTKYNEKFKGKATLTADT---SSSTAYMQLSSLTSEDSAVYYCA
--------
>Vs720-Mus_m2-120129022-ighv
-----VHSQVQLQQS--GPELVRPGVSVKISCK-GSG-YTF-TD--YA-MHWVKQSHAKS
L-EWIGVIST-Y--YGDASYNQKFKDKATMTVDK---SSSTAYMELARLTSEDSAVYYCA
--------
>Vs805-Mus_m2-120129022-ighv
-----VLSQVQLKES--GPGLVAPSQSLSITCT-VSG-FSL-TS--YG-VHWVRQPPGKG
L-EWLVVIWS-D-GS--TTYNSALKSRLSISKDN---SKSQVFLKMNSLQTDDTAMYYCA
--------
>Vs0-Homo_sapiens-ABBA01165617.1-igkv
-----ARCDIQMTQS-PSSLSASVGGRVTITCR-ASQGIS------NN-LNWYQQKPRKT
P-KLLIYAAS-S----LQ---SGIPSRFSDSG-----SGTDYTLTISSLQPEDFATYYCQ
QSDSNP--
>Vs4-Homo_sapiens-ABBA01180083.1-igkv
-----SRGEIVLTQS-PDFQSVTPKEKVTITCR-ASQSIG------SS-LHWYQQKPDQS
P-KLLIKYAS-Q----SI---SGVPSRFSGSG-----SGTDFTLTINSLEAEDAAAYYCH
QSSSL---
>Vs5-Homo_sapiens-ABBA01181004.1-igkv
-----SSGDIVMTQS-PLSLPVTPGEPASISCR-SSQSLLHS-NGYNY-LDWYLQKPGQS
P-QLLIYLGS-N----RA---SGVPDRFSGSG-----SGTDFTLKISRVEAEDVGVYYCM
QALQTP--
>Vs49-Homo_sapiens-ABBA01006960.1-igkv
-----ARCDIQMTQS-PSSLSASVGDRVTITCR-ASQGIS------NY-LAWFQQKPGKA
P-KSLIYAAS-S----LQ---SGVPSKFSGSG-----SGTDFTLTISSLQPEDFATYYCQ
QYNSYP--
>Vs739-Homo_sapiens-ABBA01015164.1-igkv
-----ARCAIQLTQS-PSSLSASVGDRVTITCR-ASQGIS------SA-LAWYQQKPGKA
P-KLLIYDAS-S----LE---SGVPSRFSGSG-----SGTDFTLTISSLQPEDFATYYCQ
QFNNY---
>Vs741-Homo_sapiens-ABBA01015164.1-igkv
-----TTGEIVLTQS-PATLSLSPGERATLSCR-ASQSVS------SY-LAWYQQKPGQA
P-RLLIYDAS-N----RA---TGIPARFSGSG-----PGTDFTLTISSLEPEDFAVYYCQ
QRSNWH--
>Vs740-Homo_sapiens-ABBA01015164.1-igkv
-----SRCDIQMTQS-PSSVSASVGDRVTITCR-ASQGIS------SW-LAWYQQKPGKA
P-KLLIYAAS-S----LQ---SGVPSRFSGSG-----SGTDFTLTISSLQPEDFATYYCQ
QANSFP--
>Vs1194-Homo_sapiens-ABBA01076850.1-igkv
-----SRGEIVLTQS-PDFQSVTPKEKVTITCR-ASQSIG------SS-LHWYQQKPDQS
P-KLLIKYAS-Q----SF---SGVPSRFSGSG-----SGTDFTLTINSLEAEDAATYYCH
QSSSL---
>Vs771-Homo_sapiens-ABBA01018824.1-igkv
---------IVMTQS-PPTLSLSPGERVTLSCR-ASQSVS-----SSY-LTWYQQKPGQA
P-RLLIYGAS-T----RA---TSIPARFSGSG-----SGTDFTLTISSLQPEDFAVYYCQ
QDYNLP--
>Vs648-Homo_sapiens-ABBA01178082.1-igkv
-----SSGDIVMTQT-PPSLPVNPGEPASISCR-SSQSLLHS-NGYTY-LHWYPQKPGQS
P-QLLIYRVS-S----RF---SGVPDRFSGSG-----SGSDFTLKISWVEAEDVGVYYCM
QA------
>Vs768-Homo_sapiens-ABBA01018824.1-igkv
-----TTGEIVLTQS-PATLSLSPGERATLSCR-ASQSVS------SY-LAWYQQKPGQA
P-RLLIYDAS-N----RA---TGIPARFSGSG-----SGTDFTLTISSLEPEDFAVYYCQ
QRSNWP--
>Vs1176-Homo_sapiens-ABBA01074234.1-igkv
-----ARCDIQVTQS-PSSLSASVGDRVTITCR-ASQGIS------NG-LSWYQQKPGQA
P-TLLIYAAS-S----LQ---SGVPSRFSGSG-----SGTDFTLTISSLQPEDVATYYCL
QDYTTP--
>Vs21-Homo_sapiens-ABBA01001852.1-igkv
-----ARCAIQMTQP-PSSLSASVGDSVTITCR-ASQSFT------NQ-LAWYQQKPGKA
P-KLLIYRVS-S----LQ---TGVPSLFSGSE-----SGTDFTLTISSLQPDDVATYYCQ
Q-------
>Vs769-Homo_sapiens-ABBA01018824.1-igkv
-----ARCDIQLTQS-PSFLSASVGDRVTITCR-ASQGIS------SY-LAWYQQKPGKA
P-KLLIYAAS-T----LQ---SGVPSRFSGSG-----SGTEFTLTISSLQPEDFATYYCQ
QLNSYP--
>Vs633-Homo_sapiens-ABBA01139012.1-igkv
-----SSEDIVMTQT-PLSLPVTPGEPASISCR-SSQSLLDSDDGNTY-LDWYLQKPGQS
P-QLLIYTLS-Y----RA---SGVPDRFSGSG-----SGTDFTLKISRVEAEDVGVYYCM
QRIEFP--
>Vs1200-Homo_sapiens-ABBA01092933.1-igkv
-----ARCDIQMTQS-PSSLSASVGDRVTITCR-ASQGIS------NN-LNWYQQKPGKT
P-KLLIYAAP-S----LQ---SGIPSRFSDSG-----SGADYTLTIRSLQPEDFATYYCQ
QSDSTP--
>Vs1203-Homo_sapiens-ABBA01101181.1-igkv
-----ARCDIQMTQS-PSSLSASVGGRVTITCR-ASQGIS------NN-LNWYQQKPGKT
P-KLLIYAAS-S----LQ---SGIPSRFSDSG-----SGTDYTLTISSLQPEDFATYYCN
RVTVPL--
>Vs624-Homo_sapiens-ABBA01077349.1-igkv
-----SRGEIVLTQS-PDFQSVTPKEKVTITCR-ASQSIG------SS-LHWYQQKPDQS
P-KLLIKYAS-Q----SI---SGVPSRFSGSG-----SGTDFTLTINSLEAEDAAAYYCH
QSSSL---
>Vs627-Homo_sapiens-ABBA01086407.1-igkv
-----SSGDIVMTQT-PPSLPVNPGEPASISCR-SSQSLLHS-NGYTY-LHWYLQKPGQS
P-QLLIYRVS-N----HL---SGVPDRFSGSG-----SGSDFTLKISWVEAEDVGVYYCM
QA------
>Vs774-Homo_sapiens-ABBA01018824.1-igkv
-----CNGDIVLTQS-PASLAVSPGQRATITCR-ASESVSFLG--INL-IHWYQQKPGQP
P-KLLIYQAS-N----KD---TGVPARFSGSG-----SGTDFTLTINPVEANDTANYYCL
QSKNFP--
>Vs770-Homo_sapiens-ABBA01018824.1-igkv
-----ARCAIRMTQS-PSSFSASTGDRVTITCR-ASQGIS------SY-LAWYQQKPGKA
P-KLLIYAAS-T----LQ---SGVPSRFSGSG-----SGTDFTLTISCLQSEDFATYYCQ
QYYSYP--
>Vs772-Homo_sapiens-ABBA01018824.1-igkv
-----ARCAIQMTQS-PSSLSASVGDRVTITCR-ASQGIR------ND-LGWYQQKPGKA
P-KLLIYAAS-S----LQ---SGVPSRFSGSG-----SGTDFTLTISSLQPEDFATYYCL
QDYNYP--
>Vs773-Homo_sapiens-ABBA01018824.1-igkv
-----AKCDIQMTQS-PSTLSASVGDRVTITCR-ASQSIS------SW-LAWYQQKPGKA
P-KLLIYKAS-S----LE---SGVPSRFSGSG-----SGTEFTLTISSLQPDDFATYYCQ
QYNSYS--
>Vs1201-Homo_sapiens-ABBA01093307.1-igkv
-----ARCDIQMTQS-PSSLSASVGDRVTITCR-ASQGIS------SW-LAWYQQKPEKA
P-KSLIYAAS-S----LQ---SGVPSRFSGSG-----SGTDFTLTISSLQPEDFATYYCQ
QYNSYP--
>Vs9-Homo_sapiens-ABBA01200654.1-igkv
-----SSGDIVMTQT-PLSSPVTLGQPASISCR-SSQSLVHS-DGNTY-LSWLQQRPGQP
P-RLLIYKIS-N----RF---SGVPDRFSGSG-----AGTDFTLKISRVEAEDVGVYYCM
QA------
>Vs1206-Homo_sapiens-ABBA01128994.1-igkv
-----SSGDVVMTQS-PLSLPVTLGQPASISCR-SSQSLVYS-DGNTY-LNWFQQRPGQS
P-RRLIYKVS-N----RD---SGVPDRFSGSG-----SGTDFTLKISRVEAEDVGVYYCM
QG------
>Vs1211-Homo_sapiens-ABBA01139312.1-igkv
-----TTGEIVMTQS-PATLSVSPGERATLSCR-ASQSVS------SN-LAWYQQKPGQA
P-RLLIYGAS-T----RA---TGIPARFSGSG-----SGTEFTLTISSLQSEDFAVYYCQ
QYNNWP--
>Vs1215-Homo_sapiens-ABBA01162428.1-igkv
-----ARCDIQMTQS-PSSLSASVGDRVTITCR-ASQGIS------NN-LNWYQQKPGKT
P-KLLIYAAS-S----LQ---SGIPSRFSDSG-----SGTDYTLTISSLQPEDFATYYCQ
QSDSTP--
>Vs1214-Homo_sapiens-ABBA01160297.1-igkv
-----ARCDIQMTQS-PSSLSASVGGRVTITCR-ASQGIS------NN-LNWYQQKPGKT
P-KLLIYAAS-S----LQ---SGIPSRFSDSG-----SGTDYTLTISSLQPEDFAAYYCQ
QSDSTP--
>Vs664-Homo_sapiens-ABBA01000473.1-igkv
-----ARCDIQMTQS-PSSLSASVGDRVTITCR-ASQGIR------ND-LGWYQQKPGKA
P-KRLIYAAS-S----LQ---SGVPSRFSGSG-----SGTEFTLTISSLQPEDFATYYCL
QHNSYP--
>Vs415-Homo_sapiens-ABBA01049978.1-igkv
-----ARCDIQMTQS-PSSLSASVGDRVTITCR-ASQGIS------NN-LNWYQQKPGKT
P-KLLIYAAS-S----LQ---SGIPSRFSDSG-----SGTDYTLTISSLQPEDFATYYCQ
QSDSTS--
>Vs663-Homo_sapiens-ABBA01000473.1-igkv
-----SSGDIVMTQT-PPSLPVNPGEPASISCR-SSQSLLHS-NGYTY-LHWYPQKPGQS
P-QLLIYRVS-S----RF---SGVPDRFSGSG-----SGSDFTLKISWVEAEDVGVYYCM
QA------
>Vs660-Homo_sapiens-ABBA01000472.1-igkv
-----ARCNIQMTQS-PSAMSASVGDRVTITCR-ARQGIS------NY-LAWFQQKPGKV
P-KHLIYAAS-S----LQ---SGVPSRFSGSG-----SGTEFTLTISSLQPEDFATYYCL
QHNSYP--
>Vs661-Homo_sapiens-ABBA01000473.1-igkv
-----TTGEIVLTQS-PATLSLSPGERATLSCG-ASQSVS-----SSY-LAWYQQKPGLA
P-RLLIYDAS-S----RA---TGIPDRFSGSG-----SGTDFTLTISRLEPEDFAVYYCQ
QYGS----
>Vs738-Homo_sapiens-ABBA01015162.1-igkv
-----ARCVIWMTQS-PSLLSASTGDRVTISCR-MSQGIS------SY-LAWYQQKPGKA
P-ELLIYAAS-T----LQ---SGVPSRFSGSG-----SGTDFTLTISCLQSEDFATYYCQ
QYYSFP--
>Vs637-Homo_sapiens-ABBA01151660.1-igkv
-----ARCDIQMTQS-PSSLSASVGDRVTITCR-ASQGIS------NN-LNWYQQKPGKT
P-KLLIYAAS-S----LQ---SGIPSRFSDSG-----SGTDYTLTISSLQPEDFATYYCQ
QSDSTS--
>Vs125-Homo_sapiens-ABBA01018823.1-igkv
-----TRAETTLTQS-PAFMSATPGDKVNISCK-ASQDI------DDD-MNWYQQKPGEA
A-IFIIQEAT-T----LV---PGIPPRFSGSG-----YGTDFTLTINNIESEDAAYYFCL
QHDNFP--
>Vs124-Homo_sapiens-ABBA01018823.1-igkv
-----AYGDIVMTQS-PDSLAVSLGERATINCK-SSQSVLYSSNNKNY-LAWYQQKPGQP
P-KLLIYWAS-T----RE---SGVPDRFSGSG-----SGTDFTLTISSLQAEDVAVYYCQ
QYYSTP--
>Vs72-Homo_sapiens-ABBA01012128.1-igkv
-----TTGEIVLTQS-PGTLSLSPGERATLSCR-ASQSVS-----SSY-LAWYQQKPGQA
P-RLLIYGAS-S----RA---TGIPDRFSGSG-----SGTDFTLTISRLEPEDFAVYYCQ
QYGS----
>Vs634-Homo_sapiens-ABBA01139012.1-igkv
-----ARCDIQMTQS-PSSLSASVGDRVTITCR-ASQSIS------SY-LNWYQQKPGKA
P-KLLIYAAS-S----LQ---SGVPSRFSGSG-----SGTDFTLTISSLQPEDFATYYCQ
QSYSTP--
>Vs662-Homo_sapiens-ABBA01000473.1-igkv
---------HILR----LHTPLFLGEPSSISCR-SGQSPFHR-NGNTY-LNWFLQKPGQP
L-KCLIYEVS-N----RK---SGVSGRFSSSG-----SGTDFILKISRVEAEDVGVYYCL
QGTQVP--
>Vs652-Homo_sapiens-ABBA01202574.1-igkv
-----ARCDIQMTQS-PSSLSASVGDRVTITCR-ASQGIS------NN-LNWYQQKPGKT
P-KFLIYAAS-S----LQ---SGIPSRFSDSG-----SGTDYTLTISSLQPEDFATYYCQ
QSDSTP--
>Vs659-Homo_sapiens-ABBA01000472.1-igkv
-----SRGDVVMTQS-PAFLSVTPGEKVTITCQ-ASEGIG------NY-LYWYQQKPDQA
P-KLLIKYAS-Q----SI---SGVPSRFSGSG-----SGTDFTFTISSLEAEDAATYYCQ
QGN-----
>Vs644-Homo_sapiens-ABBA01167939.1-igkv
-----ARCDIQMTQS-PSSLSASVGGRVTITCR-ASQGIS------NN-LNWYQQKPGKT
P-KLLIYAAS-S----LQ---SGIPSRFSDSG-----SGADYTLTISSLQPEDFAAYYCQ
QSDSTP--
>Vs640-Homo_sapiens-ABBA01158796.1-igkv
-----ARCDIQMTQS-PSSLSASVGDRVTITCR-ASQGIS------NN-LNWYQQKPGKT
P-KFLIYAAS-S----LQ---SGIPSRFSDSG-----SGTDYTLTISSLQPEDFATYYCQ
QSDSTP--
>Vs643-Homo_sapiens-ABBA01166199.1-igkv
-----ARCDIQMTQS-PSSLSASVGGRVTITCR-ASQGIS------NN-LNWYQQKPGKT
P-KLLIYAAS-S----LQ---SGIPSRFSDSG-----SGADYTLTISSLQPEDFAAYYCQ
QSDSTP--
>Vs635-Homo_sapiens-ABBA01145231.1-igkv
-----TRCDIQMTQS-PSSLSASVGDRVTITCR-ASQGIS------NY-LAWYQQKPGKV
P-KLLIYAAS-T----LQ---SGVPSRFSGSG-----SGTDFTLTISSLQPEDVATYYCQ
KYNSAP--
>Vs639-Homo_sapiens-ABBA01155544.1-igkv
-----ARCDIQMTQS-PSSLSASVGDRVTITCQ-ASQDIS------NY-LNWYQQKPGKA
P-KLLIYDAS-N----LE---TGVPSRFSGSG-----SGTDFTFTISSLQPEDIATYYCQ
QYDNLP--
>Vs638-Homo_sapiens-ABBA01153735.1-igkv
-----ARCDIQMTQS-PSSLSASVGDRVTITCR-ASQGIS------NN-LNWYQQKPGKT
P-KLLIYAAP-S----LQ---SGIPSRFSDSG-----SGADYTLTIRSLQPEDFATYYCQ
QSDSTP--
>Vs735-Homo_sapiens-ABBA01015161.1-igkv
---------IVMTQS-PATLSLSPGERATLSCR-ASQSVS-----SSY-LSWYQQKPGQA
P-RLLIYGAS-T----RA---TGIPARFSGSG-----SGTDFTLTISSLQPEDFAVYYCQ
QDYNLP--
>Vs736-Homo_sapiens-ABBA01015162.1-igkv
-----VRFDIQMIQS-PSFLSASVGDRVSIICW-ASEGIS------SN-LAWYLQKPGKS
P-KLFLYDAK-D----LH---PGVSSRFSGRG-----SGTDFTLTIISLKPEDFAAYYCK
QDFSYP--
>Vs737-Homo_sapiens-ABBA01015162.1-igkv
-----ARCAIRMTQS-PFSLSASVGDRVTITCW-ASQGIS------SY-LAWYQQKPAKA
P-KLFIYYAS-S----LQ---SGVPSRFSGSG-----SGTDYTLTISSLQPEDFATYYCQ
QYYSTP--
>Vs518-Mus_m2-149736546-igkv
-----STGDIVLTQS-PASLAVSLGQRATISCR-ASESVDNYG--ISF-MNWFQQKPGQP
P-KLLIYAAS-N----QG---SGVPARFSGSG-----SGTDFSLNIHPMEEDDTAMYFCQ
QSKEVP--
>Vs519-Mus_m2-149736546-igkv
-----STGDIVLTQS-PASLAVSLGQRATISCR-ASESVEYYG--TSL-MQWYQQKPGQP
P-KLLIYAAS-N----VE---SGVPARFSGSG-----SGTDFSLNIHPVEEDDIAMYFCQ
QSRKVP--
>Vs514-Mus_m2-149736546-igkv
-----STGDIVLTQS-PASLAVSLGQRATISCR-ASQSVSTSS--YSY-MHWYQQKPGQP
P-KLLIKYAS-N----LE---SGVPARFSGSG-----SGTDFTLNIHPVEEEDTATYYCQ
HSWEIP--
>Vs515-Mus_m2-149736546-igkv
-----STGDIVLTQS-PASLAVSLGQRATISCR-ASESVDSYG--NSF-MHWYQQKPGQP
P-KLLIYRAS-N----LE---SGIPARFSGSG-----SRTDFTLTINPVEADDVATYYCQ
QSNEDP--
>Vs516-Mus_m2-149736546-igkv
-----STGDIVLTQS-PASLAVSLGQRATISCK-ASQSVDYDG--DSY-MNWYQQKPGQP
P-KLLIYAAS-N----LE---SGIPARFSGSG-----SGTDFTLNIHPVEEEDAATYYCQ
QSNEDP--
>Vs517-Mus_m2-149736546-igkv
-----STGDIVLTQS-PASLAVSLGQRATIFCR-ASQSVDYNG--ISY-MHWFQQKPGQP
P-KLLIYAAS-N----LE---SGIPARFSGSG-----SGTDFTLNIHPVEEEDAATYYCQ
QSIEDP--
>Vs512-Mus_m2-149736546-igkv
-----STGNIVLTQS-PASLAVSLGQRATISCR-ASESVDSYG--NSF-MHWYQQKPGQP
P-KLLIYLAS-N----LE---SGVPARFSGSG-----SRTDFTLTIDPVEADDAATYYCQ
QNNEDP--
>Vs513-Mus_m2-149736546-igkv
-----STGDIVLTQS-PASLAVSLGQRATISCQ-ASESVSFAG--TSL-MHWYQQKPGQP
P-KLLIYRAS-N----LE---SGVPARFSGSG-----SESDFTLTIDPVEEDDAAMYYCM
QSMEDP--
>Vs1134-Mus_m2-149736546-igkv
-----ARCDIQMIQS-PSSMFASLGDRVSLSCR-ASQGIR------GN-LDWYQQKPGGT
I-KLLIYSTS-N----LN---SGVPSRFSGSG-----SGSDYSLTISSLESEDFADYYCL
QRNAYP--
>Vs1135-Mus_m2-149736546-igkv
-----TRCDIQMTQS-PSSLSASLGERVSLTCR-ASQEIS------GY-LSWLQQKPDGT
I-KRLIYAAS-T----LD---SGVPKRFSGSR-----SGSDYSLTISSLESEDFADYYCL
QYASYP--
>Vs1136-Mus_m2-149736546-igkv
-----TNGDVVMTQT-PLTLSVTIGQPASISCK-SSQSLLHS-NGKTY-LNWLQQRPGQA
P-KRLFYLVS-K----LD---PGIPDSFSGSG-----SETDFTLKISRVEAEDLGVYYCL
QG------
>Vs1130-Mus_m2-149736546-igkv
-----SKGEMVLTQS-PVSITASRGEKVTITCR-ASSSIS-----SNY-LHWYQQKPGSS
P-KLLIYRTS-I----LA---SGVLDSFSGSG-----SESSYTLTISCMQDEVAATYYCQ
QGSSS---
>Vs1131-Mus_m2-149736546-igkv
-----AQCDIQMTQS-PSSLSASLGGKVTITCK-ASQDIN------KY-IAWYQHKPGKG
P-RLLIHYTS-T----LQ---PGIPSRFSGSG-----SGRDYSFSISNLEPEDIATYYCL
QYDNLL--
>Vs1132-Mus_m2-149736546-igkv
-----TRCDIQMTQT-TSSLSASLGDRVTISCS-ASQGIS------NY-LNWYQQKPDGT
V-KLLIYYTS-S----LH---SGVPSRFSGSG-----SGTDYSLTISNLEPEDIATYYCQ
QYSKLP--
>Vs1133-Mus_m2-149736546-igkv
-----TRCDIQMTQT-TSSLSASLGDRVTISCR-ASQDIS------NY-LNWYQQKPDGT
V-KLLIYYTS-R----LH---SGVPSRFSGSG-----SGTDYSLTISNLEQEDIATYFCQ
QGNTLP--
>Vs510-Mus_m2-149736546-igkv
-----VDGDIVMTQS-HKFMSTSVGDRVSITCK-ASQDVS------TA-VAWYQQKPGQS
P-KLLIYSAS-Y----RY---TGVPDRFTGSG-----SGTDFTFTISSVQAEDLAVYYCQ
QHYSTP--
>Vs511-Mus_m2-149736546-igkv
-----STGDIVLTQS-PASLAVSLGQRATISCR-ASKSVSTSG--YSY-MHWYQQKPGQP
P-KLLIYLAS-N----LE---SGVPARFSGSG-----SGTDFTLNIHPVEEEDAATYYCQ
HSRELP--
>Vs1088-Mus_m2-149736546-igkv
-----SAVTGETTQA-PASLSFSLGETATLSCR-SSESV------GSY-LAWYQQKAEQV
P-RLLIHSAS-T----RA---GGVPVRFSGTG-----SGTDFTLTISSLEPEDAAVYYCQ
PFKSWS--
>Vs1089-Mus_m2-149736546-igkv
-----STGDILLTQS-PATLSVTPGETVSLSCR-ASQSI------YKN-LHWYQQKSHRS
P-RLLIKYAS-D----SI---SGIPSRFTGSG-----SGTDYTLSINSVKPEDEGIYYCL
QGY-----
>Vs1121-Mus_m2-149736546-igkv
---IMSRGQIVLTQS-PAIMSASLGEEITLTCS-ASSSV-------SY-MHWYQQKSGTS
P-KLLIYSTS-N----LA---SGVPSRFSGSG-----SGTFYSLTISSVEAEDAADYYCH
QWSSY---
>Vs495-Mus_m2-149736546-igkv
-----STADIVMTQA-AFSNPVTLGTSASISCR-SSKSLLHS-NGITY-LYWYLQKPGQS
P-QLLIYQMS-N----LA---SGVPDRFSSSG-----SGTDFTLRISRVEAEDVGVYYCA
QNLELP--
>Vs1110-Mus_m2-149736546-igkv
---IMSRGQIVLTQS-PAIMSASPGEKVTISCS-ASSSV-------SY-MYWYQQKPGSS
P-KPWIYRTS-N----LA---SGVPARFSGSG-----SGTSYSLTISSMEAEDAATYYCQ
QYHSY---
>Vs494-Mus_m2-149736546-igkv
-----SSSDVVMTQT-PLSLPVSLGDQASISCR-SSQSLVHS-NGNTY-LHWYLQKPGQS
P-KLLIYKVS-N----RF---SGVPDRFSGSG-----SGTDFTLKISRVEAEDLGVYFCS
QS------
>Vs497-Mus_m2-149736546-igkv
-----TRCDIRMIQT-PASLSGSLGESVTITCQ-ASQDI------GKS-LLWYQQKTGNP
P-KILIYTTS-N----LA---DGISSRVSGSG-----SGTQFFLKFSSLKPEDTATYYCC
QGYWLF--
>Vs496-Mus_m2-149736546-igkv
-----ARCDVLMTQS-PSSLSASLGERVSLTCQ-ASQGIS------NN-LNWYQQTPGKA
P-RLLIYDAS-K----LE---DGVPSRFSGTG-----YRTDFNFTISSLEEEDVATYFCL
QHRYLP--
>Vs499-Mus_m2-149736546-igkv
-----VRCDIQMNQS-PSSLSASLGDTITITCH-ASQNIN------VW-LSWYQQKPGNI
P-KLLIYKAS-N----LH---TGVPSRFSGSG-----SGTGFTLTISSLQPEDIATYYCQ
QGQSYP--
>Vs498-Mus_m2-149736546-igkv
-----AQCDVQITQS-PSYLAASPGETITINCR-ASKSIS------KY-LAWYQEKPGKT
N-KLLIYSGS-T----LQ---SGIPSRFSGSG-----SGTDFTLTISSLEPEDFAMYYCQ
QHNEYP--
>Vs1082-Mus_m2-149736546-igkv
-----ADGNIVMTQS-PKSMSMSVGERVTLSCK-ASENV------GTY-VSWYQQKPEQS
P-KLLIYGAS-N----RY---PGVPDRFTGSG-----SATDFTLTISSLQAEDLADYHCG
QGYSYL--
>Vs1083-Mus_m2-149736546-igkv
-----TCGDIVMSQS-PSSLAVSVGEKVTMSCK-SSQSLLYSSNQKNY-LAWYQQKPGQS
P-KLLIYWAS-T----RE---SGVPDRFTGSG-----SGTDFTLTISSVKAEDLAVYYCQ
QYYSYP--
>Vs491-Mus_m2-149736546-igkv
-----SSSDVLLTQT-PLFLPVSLGDQASISCS-SSQSLVHS-NGNSY-LEWHLQKSGQS
L-QLLIYEVS-K----RH---SGVPDRFSGSG-----SGTDFTLKISRVEPEDLGVYYCF
QG------
>Vs1122-Mus_m2-149736546-igkv
---IMSRGENVLTQS-PAIMAASPGEKVTMTCS-ASSSVS-----SSN-LHWYQQKSGTS
T-KFWIYRTS-N----LA---SEVPAPFSGSG-----SGTSYSLTISSVEAEDAATYYCQ
QWSGY---
>Vs493-Mus_m2-149736546-igkv
-----IKCDIKMTQS-PSSMYASLGERVTITCK-ASQDIN------SY-LSWFQQKPGKS
P-KTLIYRAN-R----LV---DGVPSRFSGSG-----SGQDYSLTISSLEYEDMGIYYCL
QYDEFP--
>Vs1120-Mus_m2-149736546-igkv
---IMSRGQIVLTQS-PAIMSASPGEKVTLTCS-ASSSVS-----SSY-LYWYQQKPGSS
P-KLWIYSTS-N----LA---SGVPARFSGSG-----SGTSYSLTISSMEAEDAASYFCH
QWSSY---
>Vs1127-Mus_m2-149736546-igkv
---VVVRCDIQMTQS-PASLSASVGETVTITCG-ASENIY------GA-LNWYQRKQGKS
P-QLLIYGAT-N----LA---DGMSSRFSGSG-----SGRQYSLKISSLHPDDVATYYCQ
NVLSTP--
>Vs1126-Mus_m2-149736546-igkv
-----SRGDVVVTQT-PLSLPVSFGDQVSISCR-SSQSLANS-YGNTY-LSWYLHKPGQS
P-QLLIYGIS-N----RF---SGVPDRFSGSG-----SGTDFTLKISTIKPEDLGMYYCL
QG------
>Vs1125-Mus_m2-149736546-igkv
-----VLCDIQMTQS-SSFLSASLGDHLTINCR-ASKDI------NKY-FAWVQQKPRKA
P-RMLIHFAS-T----LL---PGVPEKFSGSG-----SGTDFSLTIRNIESEDIAMYYCL
QYSEHP--
>Vs1124-Mus_m2-149736546-igkv
-----SRGEIVLTQS-PAITAASLGQKVTITCS-ASSSV-------SY-MHWYQQKSGTS
P-KPWIYEIS-K----LA---SGVPARFSGSG-----SGTSYSLTISSMEAEDAAIYYCQ
QWNYPL--
>Vs1080-Mus_m2-149736546-igkv
-----TCGNIMMTQS-PSSLAVSAGEKVTMSCK-SSQSVLYSSNQKNY-LAWYQQKPGQS
P-KLLIYWAS-T----RE---SGVPDRFTGSG-----SGTDFTLTISSVQAEDLAVYYCH
QYLS----
>Vs1081-Mus_m2-149736546-igkv
-----TCGDIVMTQS-PSSLSVSAGEKVTMSCK-SSQSLLNSGNQKNY-LAWYQQKPGQP
P-KLLIYGAS-T----RE---SGVPDRFTGSG-----SGTDFTLTISSVQAEDLAVYYCQ
NDHSYP--
>Vs1129-Mus_m2-149736546-igkv
---IVSNGEIVLTQS-PTTMAASPGEKITITCS-ASSSIS-----SNY-LHWYQQKPGFS
P-KLLIYRTS-N----LA---SGVPARFSGSG-----SGTSYSLTIGTMEAEDVATYYCQ
QGSSI---
>Vs1128-Mus_m2-149736546-igkv
---ILTNGEILLTQS-PAIIAASPGEKVTITCS-ASSSV-------SY-MNWYQQKPGSS
P-KIWIYGIS-N----LA---SGVPARFSGSG-----SGTSFSFTINSMEAEDVATYYCQ
QRSSY---
>Vs1084-Mus_m2-149736546-igkv
-----AHGSIVMTQT-PKFLLVSAGDRVTITCK-ASQSVS------ND-VAWYQQKPGQS
P-KLLIYYAS-N----RY---TGVPDRFTGSG-----YGTDFTFTISTVQAEDLAVYFCQ
QDYSSP--
>Vs1085-Mus_m2-149736546-igkv
-----ACADIVMTQS-PTFLAVTASKKVTISCT-ASESLYSSKHKVHY-LAWYQKKPEQS
P-KLLIYGAS-N----RY---IGVPDRFTGSG-----SGTDFTLTISSVQVEDLTHYYCA
QFYSYP--
>Vs1086-Mus_m2-149736546-igkv
-----TCGDILMTQS-PSSLTVSAGEKVTMSCK-SSQSLLASGNQNNY-LAWHQQKPGRS
P-KMLIIWAS-T----RV---SGVPDRFIGSG-----SGTDFTLTINSVQAEDLAVYYCQ
QSYSAP--
>Vs1087-Mus_m2-149736546-igkv
-----ISGDVVMTQT-PLTLSATIGQSASVSCR-SSQSLLHS-NGNTY-LNWFVQRPGPS
P-QLLIYGVF-E----QE---SGVPDRFSGSG-----SGTDFTLKISRVEAEDLGVYYCM
QATYEP--
>Vs276-Mus_m2-98207768-igkv
-----ARCDIQMTQS-PSSMSVSLGERVSITCR-ASQGTS------SY-LSWLQQKPGKS
P-KTLISYAT-N----LE---DRVPSWFSGSW-----SGADYSLTISNLESEDFTDYYCV
QYAQFP--
>Vs1118-Mus_m2-149736546-igkv
--------QIVLTQS-PAIMSASPGERVTMTCS-ASSSVS-----SSY-LYWYQQKSGSS
P-KLWIYSIS-N----LA---SGVPARFSGSG-----SGTSYSLTINSMEAEDAATYYCQ
QWSSN---
>Vs1119-Mus_m2-149736546-igkv
---IMSRGQIVLTQS-PAIMSASLGERVTMTCT-ASSSVS-----SSY-LHWYQQKPGSS
P-KLWIYSTS-N----LA---SGVPARFSGSG-----SGTSYSLTISSMEAEDAATYYCH
QYHRS---
>Vs1112-Mus_m2-149736546-igkv
---IMSRGENVLTQS-PAIMSASPGEKVTMTCS-ASSSV-------SY-MHWYQQKSSTS
P-KLWIYDTS-K----LA---SGVPGRFSGSG-----SGNSYSLTISSMEAEDVATYYCF
QGSGY---
>Vs1113-Mus_m2-149736546-igkv
---IMSRGQIVLTQS-PALMSASPGEKVTMTCS-ASSSV-------SY-MYWYQQKPRSS
P-KPWIYLTS-N----LA---SGVPARFSGSG-----SGTSYSLTISSMEAEDAATYYCQ
QWSSN---
>Vs1111-Mus_m2-149736546-igkv
---ILSRGQIVLTQS-PAIMSASPGEKVTMTCS-ASSSV-------SY-MYWYQQKPGSS
P-RLWIYDTS-N----LV---SGVPARFSGSR-----SGTSYSLTISSMEAEDAATYYCQ
QYSGYP--
>Vs1116-Mus_m2-149736546-igkv
---ILFRGQIVLTQS-PAIMSASPGEKVTMTCS-ASSSV-------SY-MHWYQQKPGSS
P-RLWIYLTF-N----LA---SGVPARFSGSG-----SGTSYSLSISSMEAEDAATYYCQ
QWSSN---
>Vs1117-Mus_m2-149736546-igkv
---IMSRGQIVLSQS-PAILSASPGEKVTMTCR-ASSSV-------SY-MHWYQQKPGSS
P-KPWIYATS-N----LA---SGVPARFSGSG-----SGTSYSLTISRVEAEDAATYYCQ
QWSSN---
>Vs1114-Mus_m2-149736546-igkv
---IMSRGQILLTQS-PAIMSASPGEKVTMTCS-ASSSV-------SY-MHWYQQKPGSS
P-KPWIYDTS-N----LA---SGFPARFSGSG-----SGTSYSLIISSMEAEDAATYYCH
QRSSY---
>Vs1115-Mus_m2-149736546-igkv
---ILSRGQIVLTQS-PAIMSASPGEKVTMTCS-ASSSI-------SY-MHWYQQKPGTS
P-KRWIYDTS-K----LA---SGVPARFSGSG-----SGTSYSLTISSMEAEDAATYYCH
QRSSY---
>Vs289-Mus_m2-94987271-igkv
---------TTVTQS-PTSLSMATGEKVTIRCI-TRTDI------DDD-MNWYQQKPGEP
P-KLLISEGN-T----LR---PGVPSRFSNSG-----YGTDFLLTIENTLSEDVADYYCL
QSDNLP--
>Vs479-Mus_m2-149736546-igkv
-----TNGDVVMTQT-PLTLSVTIGQPASISCK-SSQSLLDS-DGKTY-LNWLLQRPGQS
P-KRLIYLVS-K----LD---SGVPDRFTGSG-----SGTDFTLKISRVEAEDLGVYYCW
QG------
>Vs478-Mus_m2-149736546-igkv
-----AIGDIVMTQA-APSVPVTPGESVSISCR-SSKSLLHS-NGNTY-LYWFLQRPGQS
P-QLLIYRMS-N----LA---SGVPDRFSGSG-----SGTAFTLRISRVEAEDVGVYYCM
QHLEYP--
>Vs1097-Mus_m2-149736546-igkv
-----ARCDIQVTQS-PASLSAPVGESVSITCK-ASEEIY------SA-LNWYQQKPGKS
P-QLLIYYAT-S----LG---DDVPSRFSGSK-----SGTQYSLKISSLQPEDLATYYCE
QSYK----
>Vs1096-Mus_m2-149736546-igkv
-----ARCDIQMTQS-PASLSVSVGETVTITCR-ASENIY------SN-LAWYQQKQGKS
P-QLLVYAAT-N----LA---DGVPSRFSGSG-----SGTQYSLKINSLQSEDFGSYYCQ
HFWGTP--
>Vs1095-Mus_m2-149736546-igkv
-----SRGDIVLTQS-PATLSVTPGDRVSLSCR-ASQSIS------NY-LHWYQQKSHES
P-RLLIKYAS-Q----SI---SGIPSRFSGSG-----SGTDFTLSINSVETEDFGMYFCQ
QSNSW---
>Vs1094-Mus_m2-149736546-igkv
-----ARCDIQMTQS-PASLSASVGETVTITCR-ASENIY------SY-LAWYQQKQGKS
P-QLLVYNAK-T----LA---EGVPSRFSGSG-----SGTQFSLKINSLQPEDFGSYYCQ
HHYGTP--
>Vs1093-Mus_m2-149736546-igkv
-----SRGDIVLTQS-PATLSVTPGDSVSLSCR-ASQSIS------NN-LHWYQQKSHES
P-RLLIKYAS-Q----SI---SGIPSRFSGSG-----SGTDFTLSINSVETEDFGMYFCQ
QSNSW---
>Vs1092-Mus_m2-149736546-igkv
-----ARCDIQMTQS-PASLSASVGETVTITCR-ASGNIH------NY-LAWYQQKQGKS
P-QLLVYNAK-T----LA---DGVPSRFSGSG-----SGTQYSLKINSLQPEDFGSYYCQ
HFWSTP--
>Vs1091-Mus_m2-149736546-igkv
-----SRCDIVMTQS-PATLSVTPGDRVSLSCR-ASQSIS------DY-LHWYQQKSHES
P-RLLIKYAS-Q----SI---SGIPSRFSGSG-----SGSDFTLSINSVEPEDVGVYYCQ
N-------
>Vs1090-Mus_m2-149736546-igkv
-----AGCDIQMTQS-PASLAASVGETVTITCR-ASENIY------YS-LAWYQQKQGKS
P-QLLIYNAN-S----LE---DGVPSRFSGSG-----SGTQYSMKINSMQPEDTATYFCK
QAYDVP--
>Vs1099-Mus_m2-149736546-igkv
---VMSRGENVLTQS-PAIMSASLGEKVTMSCR-ASSSV-------NY-MYWYQQKSDAS
P-KLWIYYTS-N----LA---PGVPARFSGSG-----SGNSYSLTISSMEGEDAATYYCQ
QFTSSP--
>Vs1098-Mus_m2-149736546-igkv
-----SRGDILLTQS-PAILSVSPGERVSFSCR-ASQSI------GTS-IHWYQQRTNGS
P-RLLIKYAS-E----SI---SGIPSRFSGSG-----SGTDFTLSINSVESEDIADYYCQ
QSNSWP--
>Vs482-Mus_m2-149736546-igkv
-----ARCEIQMTQS-PSSMSASLGDRITITCQ-ATQDIV------KN-LNWYQQKPGKP
P-SFLIYYAT-E----LA---EGVPSRFSGSG-----SGSDYSLTISNLESEDFADYYCL
QFYEFP--
>Vs483-Mus_m2-149736546-igkv
-----SRAETTVTQS-PASLSVATGEKVTIRCI-TSTDI------DDD-MNWYQQKPGEP
P-KLLISEGN-T----LR---PGVPSRFSSSG-----YGTDFVFTIENTLSEDVADYYCL
QSDNMP--
>Vs480-Mus_m2-149736546-igkv
-----TNGDVVMTQT-PLTLSVTIGQPASISCK-SSQSLLYS-NGKTY-LNWLLQRPGQS
P-KRLIYLVS-K----LD---SGVPDRFTGSG-----SGTDFTLKISRVEAEDLGVYYCV
QG------
>Vs481-Mus_m2-149736546-igkv
-----TNGDVVMTQT-PLSLSVTIGQPASISCK-SSQSLLYS-NGKTY-LNWLQQRPGQA
P-KHLMYQVS-K----LD---PGIPDRFSGSG-----SETDFTLKISRVEAEDLGVYYCL
QGTYY---
>Vs486-Mus_m2-149736546-igkv
-----SSSDAVMTQT-PLSLPVSLGDQASISCR-SSQSLENS-NGNTY-LNWYLQKPGQS
P-QLLIYRVS-N----RF---SGVLDRFSGSG-----SGTDFTLKISRVEAEDLGVYFCL
QV------
>Vs487-Mus_m2-149736546-igkv
-----SRAETTVTQS-PASLSMAIGEKVTIRCI-TSTDI------DDD-MNWYQQKPGEP
P-KLLISEGN-T----LR---PGVPSRFSSSG-----YGTDFVFTIENMLSEDVADYYCL
QSDNLP--
>Vs484-Mus_m2-149736546-igkv
-----IRCDIKMTQS-PSSMYASLGERVTITCK-ASQDIK------SY-LSWYQQKPWKS
P-KTLIYYAT-S----LA---DGVPSRFSGSG-----SGQDYSLTISSLESDDTATYYCL
QHGESP--
>Vs485-Mus_m2-149736546-igkv
-----ARCDVQMIQS-PSSLSASLGDIVTMTCQ-ASQGTS------IN-LNWFQQKPGKA
P-KLLIYGAS-N----LE---DGVPSRFSGSR-----YGTDFTLTISSLEDEDMATYFCL
QHSYLP--
>Vs488-Mus_m2-149736546-igkv
-----TRCDIQMTQS-PSSLSASLGERVSLTCR-ASQDIG------SS-LNWLQQEPDGT
I-KRLIYATS-S----LD---SGVPKRFSGSR-----SGSDYSLTISSLESEDFVDYYCL
QYASSP--
>Vs489-Mus_m2-149736546-igkv
-----SSSDVLMTQT-PLSLPVSLGDQASISCR-SSQSIVHS-NGNTY-LEWYLQKPGQS
P-KLLIYKVS-N----RF---SGVPDRFSGSG-----SGTDFTLKISRVEAEDLGVYYCF
QG------
>Vs1141-Mus_m2-149736546-igkv
-----ARCDIQMTQS-PSSMSASLRERVSLTCQ-ASQGIN------GN-LHWFQQKSGGT
L-KHLIYSTS-N----LD---SGVPSRFSGSG-----SGSDYSLTISSLESEDFAVYYCL
QYDEYP--
>Vs1140-Mus_m2-149736546-igkv
-----ATGDIVMTQA-APSVPANPGESVSISCR-SSKSLLHS-SGNTY-LYWFLQRPGQS
P-QLLIYYIS-N----LA---SGVPDRFSGSG-----SGTDFTLRISRVEAEDVGVYYCM
QGLEYP--
>Vs1123-Mus_m2-149736546-igkv
-----IICDIQMTQS-SSYLSVSLGGRVTITCK-ASDHIN------NW-LAWYQQKPGNA
P-RLLISGAT-S----LE---TGVPSRFSGSG-----SGKDYTLSITSLQTEDVATYYCQ
QYWSTP--
>Vs503-Mus_m2-149736546-igkv
-----GKCDIQMTQS-PASQSASLGESVTITCL-ASQTIG------TW-LAWYQQKPGKS
P-QLLIYAAT-S----LA---DGVPSRFSGSG-----SGTKFSFKISSLQAEDFVSYYCQ
QLYSTP--
>Vs502-Mus_m2-149736546-igkv
-----SSSDVVLTQT-PLSLPVNIGDQASISCK-STKSLLNS-DGFTY-LDWYLQKPGQS
P-QLLIYLVS-N----RF---SGVPDRFSGSG-----SGTDFTLKISRVEAEDLGVYYCF
QSNYLP--
>Vs501-Mus_m2-149736546-igkv
-----ARCDILMTQS-PSSMSVSLGDTVSITCH-ASQGIS------SN-IGWLQQKPGKS
F-KGLIYHGT-N----LE---DGVPSRFSGSG-----SGADYSLTISSLESEDFADYYCV
QYAQFP--
>Vs500-Mus_m2-149736546-igkv
-----MSCNIQVIQS-P-FLSASVGERVTISCK-THQHI------NSS-IAWYQQKVGKA
P-ILLIRDAS-F----SL---TDTPSRFTGNG-----FGTDFTLSISSMQSQDGATYFCQ
QH------
>Vs507-Mus_m2-149736546-igkv
-----MICDIQMTQS-SSSFSVSLGDRVTITCK-ASEDIY------NR-LAWYQQKPGNA
P-RLLISGAT-S----LE---TGVPSRFSGSG-----SGKDYTLSITSLQTEDVATYYCQ
QYWSTP--
>Vs505-Mus_m2-149736546-igkv
-----TRYDIQMTQT-TSSLSASLGDRVTISCR-ASEDIS------TY-LNWYQQKPDGT
V-KLLIYYTS-G----LH---SGVPSRFSGSG-----SGADYSLTISNLEPEDIATYYCQ
QYSKLP--
>Vs504-Mus_m2-149736546-igkv
-----VRCDIQMTQS-PSTLSASLGDRVTITCH-ASQNIK------SW-LAWCQQKPGNS
P-KLLIYEAT-K----LQ---IG----FSGSG-----YGTDFTISISSLQSEDIVIYHCL
--------
>Vs509-Mus_m2-149736546-igkv
-----VDGDIVMTQS-HKFMSTSVGDRVSITCK-ASQDVS------TA-VAWYQQKPGQS
P-KLLIYWAS-T----RH---TGVPDRFTGSG-----SGTDYTLTISSVQAEDLALYYCQ
QHY-----
>Vs508-Mus_m2-149736546-igkv
-----STGDIVLTQT-SACFVVSLGQRDNISCK-SCESVTDT-LCNNS-MQWYQQNPEQL
P-IVLIYEAY-S----VE---SGVYVRFCGSW-----CETDFKLTIYPVEDSNAASYYCQ
QSKEF---
>Vs490-Mus_m2-149736546-igkv
-----STADIVMTQA-AFSNPVTLGTSASISCR-SSKNLLHS-NGITY-LYWYLQRPGQS
P-QLLIYRVS-N----LA---SGVPNRFSGSE-----SGTDFTLRISRVEAEDVGVYYCA
QLLELP--
>Vs1109-Mus_m2-149736546-igkv
---IISRGQIVLTQS-PAIMSASPGEKVTMTCS-ASSSV-------SY-MHWYQQKSGTS
P-KRWIYDTS-K----LA---SGVPARFSGSG-----SGTSYSLTISSMEAEDAATYYCQ
QWSSN---
>Vs1108-Mus_m2-149736546-igkv
---ILSSGEIVLTQS-PALMAASPGEKVTITCS-VSSSIS-----SSY-LHWYQQKSGIS
P-KPWIYGTS-N----LA---SGVPARFSGSG-----SGTSYSLTISSMEAEDAATYYCQ
QWSSS---
>Vs1100-Mus_m2-149736546-igkv
---IMSRGENVLTQS-PAIMAASLGEKVTMTCS-ASSSVS-----SSY-LHWYQQKSGTS
P-KLWIYGTS-N----LA---SGVPARFSGSG-----AGISYSLTISSMEAENDATYYCQ
QWSGYP--
>Vs1103-Mus_m2-149736546-igkv
---ILSRGQIVLTQS-PAIMSASPGEKVTMTCS-ASSSV-------SY-MYWYQQKPGSS
P-RLLIYDTS-N----LA---SGVPVRFSGSG-----SGTSYSLTISRMEAEDAATYYCQ
QWSSY---
>Vs1102-Mus_m2-149736546-igkv
---ILSSGEIVLTQS-PALMAASPGEKVTITCS-VSSSIS-----SSN-LHWYQQKSETS
P-KPWIYGTS-N----LA---SGVPVRFSGSG-----SGTSYSLTISSMEAEDAATYYCQ
QWSSY---
>Vs1105-Mus_m2-149736546-igkv
---IMSRGQIVLTQS-PAIMSASPGEKVTITCS-ASSSV-------SY-MHWFQQKPGTS
P-KLWIYSTS-N----LA---SGVPARFSGSG-----SGTSYSLTISRMEAEDAATYYCQ
QRSSY---
>Vs1104-Mus_m2-149736546-igkv
---ILSRGQIVLTQS-PAIMSASPGQKVTITCS-AISSV-------NY-MHWYQQKPGSS
P-KLWIYATS-K----LA---LGVPACFSGSG-----SGTSYSLTISSMVAEDATSYFCH
QWSSY---
>Vs1107-Mus_m2-149736546-igkv
---IMSRGENVLTQS-PAIMAASLGQKVTMTCS-ASSSVS-----SSY-LHWYQQKSGAS
P-KPLIHRTS-N----LA---SGVPARFSGSG-----SGTSYSLTISSVEAEDDATYYCQ
QWSGYP--
>Vs1106-Mus_m2-149736546-igkv
---AMSRGENVLTQS-PAIMSASPGEKVTMTCR-ASSSVS-----SSY-LHWYQQKSGAS
P-KLWIYSTS-N----LA---SGVPARFSGSG-----SGTSYSLTISSVEAEDAATYYCQ
QYSGY---
>Vs492-Mus_m2-149736546-igkv
-----VSGDIVITQD-ELSNPVTSGESVSISCR-SSKSLLYK-DGKTY-LNWFLQRPGQS
P-QLLIYLMS-T----RA---SGVSDRFSGSG-----SGTDFTLEISRVKAEDVGVYYCQ
QLVEYP--
>Vs1079-Mus_m2-149736546-igkv
-----ACADIVMTQS-PSSLAMSVGQKVTMSCK-SSQSLLNSSNQKNY-LAWYQQKPGQS
P-KLLVYFAS-T----RE---SGVPDRFIGSG-----SGTDFTLTISSVQAEDLADYFCQ
QHY-----
>Vs1078-Mus_m2-149736546-igkv
-----ACGEIVL--------TVSAGERVTISCK-SNQNLLWSGNQRYC-LVWHQWKPGQT
P-TPLITWTS-D----RY---SGVPDRFIGSG-----SVTDFTLTISSVQAEDVAVYFCQ
QH------
>Vs1071-Mus_m2-149736546-igkv
-----VDGDIVMTQS-QKFMSTSVGDRVSITCK-ASQNV------RTA-VAWYQQKPGQS
P-KALIYLAS-N----RH---TGVPDRFTGSG-----SGTDFTLTISNVQSEDLADYFCL
QHWNYP--
>Vs1070-Mus_m2-149736546-igkv
-----VDGDIVMTQS-QKFMSTSVGDRVSITCK-ASQNVG------TA-VAWYQQKPGQS
P-KLLIYSAS-N----RY---TGVPDRFTGSG-----SGTDFTLTISNMQSEDLADYFCQ
QYSSYP--
>Vs1073-Mus_m2-149736546-igkv
-----ACGEIVLTQS-IPSLTVSAGERVTISCK-SNQNLLWSGNQRYC-LVWHQWKPGQT
P-TPLITWTS-D----RY---SGVPDRFIGSG-----SVTDFTLTISSVQAEDVAVYFCQ
QH------
>Vs1072-Mus_m2-149736546-igkv
-----VDGDIVMTQS-QKFMSTSVGDRVSVTCK-ASQNV------GTN-VAWYQQKPGQS
P-KALIYSAS-Y----RY---SGVPDRFTGSG-----SGTDFTLTISNVQSEDLAEYFCQ
QYNSYP--
>Vs1075-Mus_m2-149736546-igkv
-----ADGNIVMTQS-PKSMSMSVGERVTLSCK-ASENV------GTY-VSWYQQKPEQS
P-KLLIYGAS-N----RY---TGVPDRFTGSG-----SATDFTLTISSVQAEDLADYHCG
QSYSYP--
>Vs1074-Mus_m2-149736546-igkv
-----TCGDIVMTQS-PSSLTVTAGEKVTMSCK-SSQSLLNSGNQKNY-LTWYQQKPGQP
P-KLLIYWAS-T----RE---SGVPDRFTGSG-----SGTDFTLTISSVQAEDLAVYYCQ
NDYSYP--
>Vs1077-Mus_m2-149736546-igkv
-----VEGDIVMTQS-HKFMSTSVGDRVSITCK-ASQDVG------TA-VAWYQQKPGQS
P-KLLIYWAS-T----RH---TGVPDRFTGSG-----SGTDFTLTISNVQSEDLADYFCQ
QYSSYP--
>Vs1076-Mus_m2-149736546-igkv
-----TCGDIVMSQS-PSSLAVSAGEKVTMSCK-SSQSLLNSRTRKNY-LAWYQQKPGQS
P-KLLIYWAS-T----RE---SGVPDRFTGSG-----SGTDFTLTISSVQAEDLAVYYCK
QSYNL---
>Vs455-Homo_sapiens-ABBA01055083.1-iglv
------SLSQPVLTQ-PTSLSASPGASARLTCT-LRSGIN---LGSYR-IFWYQQKPESP
P-RYLLSYYS-D-SSKHQG--SGVPSRFSGSKDA---SSNAGILVISGLQSEDEADYYCM
I-------
>Vs457-Homo_sapiens-ABBA01055083.1-iglv
-----SNSQAVVTQE--PSLTVSPGGTVTLTCG-SSTGA--V-TSGHY-PYWFQQKPGQA
P-RTLIYDTS-N----KH---SWTPARFSGSL-----LGGKAALTLLGAQPEDEAEYYCL
LSYSGA--
>Vs451-Homo_sapiens-ABBA01055082.1-iglv
------SVVQAGLTQ-PPSVSKGLRQTATLTCT-GNSNNV----GNQG-AAWLQQHQGHP
P-KLLSY------RNNNRP--SGISERLSASRSG-----NTASLTITGLQPEDEADYYCS
AWDSSLS-
>Vs450-Homo_sapiens-ABBA01055082.1-iglv
-----SWANFMLTQP--HSVSESPGKTVTISCT-GSSGS--I-ASNY--VQWYQQRPGSA
P-TTVIYEDN-Q----RP---SGVPDRFSGSIDS---SSNSASLTISGLKTEDEADYYCQ
SYDSS---
>Vs453-Homo_sapiens-ABBA01055083.1-iglv
-----SWAQSVLTQP--PSVSAAPGQKVTISCS-GSSSN--I-GNNY--VSWYQQLPGTA
P-KLLIYDNN-K----RP---SGIPDRFSGSK-----SGTSATLGITGLQTGDEADYYCG
TWDSSLSA
>Vs452-Homo_sapiens-ABBA01055083.1-iglv
------SLSQPVLTQ-PSSHSASSGASVRLTCM-LSSGFS---VGDFW-IRWYQQKPGNP
P-RYLLYYHS-D-SNKGQG--SGVPSRFSGSNDA---SANAGILRISGLQPEDEADYYCG
T-------
>Vs448-Homo_sapiens-ABBA01055078.1-iglv
------SLSQLVLTQ-SPSASASLGASVKLTCT-LSSGHS-----SYA-IAWHQQQPEKG
P-RYLMKLNS-D-GSHSKG--DGIPDRFSGSSSG-----AERYLTISSLQSEDEADYYCQ
TW------
>Vs473-Homo_sapiens-ABBA01055095.1-iglv
-----SATSYELTQP--HSVSVATAQMARITCG-GNN----I-GS-KA-VHWYQQKPGQD
P-VLVIYSDS-N----RP---SGIPERFSGSN-----PGNTATLTISRIEAGDEADYYCQ
VWDSSSDH
>Vs472-Homo_sapiens-ABBA01055095.1-iglv
-----SVASYELTQP--PAVSVSPGQTARISCS-GDV----L-RD-NY-ADWYPQKPGQA
P-VLVIYKDG-E----RP---SGIPERFSGST-----SGNTTALTISRVLTKGGADYYCF
SGD-----
>Vs477-Homo_sapiens-ABBA01055095.1-iglv
-----SWAQSALTQP--PSASGSPGQSVTISCT-GTSSD--V-GGYNY-VSWYQQHPGKA
P-KLMIYEVS-K----RP---SGVPDRFSGSK-----SGNTASLTVSGLQAEDEADYYCS
SYAGSNN-
>Vs476-Homo_sapiens-ABBA01055095.1-iglv
-----SVASYELTQP--LSVSVALGQTARITCG-GNN----I-GS-KN-VHWYQQKPGQA
P-VLVIYRDS-N----RP---SGIPERFSGSN-----SGNTATLTISRAQAGDEADYYCQ
VWDS----
>Vs475-Homo_sapiens-ABBA01055095.1-iglv
-----SEASYELTQP--PSVSVSPGQTARITCS-GDA----L-PK-KY-AYWYQQKSGQA
P-VLVIYEDS-K----RP---SGIPERFSGSS-----SGTMATLTISGAQVEDEADYYCY
STDSSGNH
>Vs474-Homo_sapiens-ABBA01055095.1-iglv
-----SWAQSALTQP--RSVSGSPGQSVTISCT-GTSSD--V-GGYNY-VSWYQQHPGKA
P-KLMIYDVS-K----RP---SGVPDRFSGSK-----SGNTASLTISGLQAEDEADYYCC
SYAGS---
>Vs479-Homo_sapiens-ABBA01055098.1-iglv
-----SVASYELTQP--PSVSVSPGQTASITCS-GDK----L-GD-KY-ACWYQQKPGQS
P-VLVIYQDS-K----RP---SGIPERFSGSN-----SGNTATLTISGTQAMDEADYYCQ
AWDS----
>Vs449-Homo_sapiens-ABBA01055078.1-iglv
-----VDSQTVVTQE--PSFSVSPGGTVTLTCG-LSSGS--V-STSYY-PSWYQQTPGQA
P-RTLIYSTN-T----RS---SGVPDRFSGSI-----LGNKAALTITGAQADDESDYYCV
LYMGSGI-
>Vs471-Homo_sapiens-ABBA01055095.1-iglv
-----SWAQSALTQP--ASVSGSPGQSITISCT-GTSSD--V-GGYNY-VSWYQQHPGKA
P-KLMIYDVS-N----RP---SGVSNRFSGSK-----SGNTASLTISGLQAEDEADYYCS
SYTSS---
>Vs458-Homo_sapiens-ABBA01055083.1-iglv
------SLSQAVLTQ-PSSLSASPGASASLTCT-LRSGIN---VGTYR-IYWYQQKPGSP
P-QYLLRYKS-D-SDKQQG--SGVPSRFSGSKDA---SANAGILLISGLQSEDEADYYCM
I-------
>Vs468-Homo_sapiens-ABBA01055094.1-iglv
-----SVVSSELTQD--PAVSVALGQTVRITCQ-GDS----L-RS-YY-ASWYQQKPGQA
P-VLVIYGKN-N----RP---SGIPDRFSGSS-----SGNTASLTITGAQAEDEADYYCN
SRDSSGNH
>Vs469-Homo_sapiens-ABBA01055094.1-iglv
-----SWAQSALTQP--PSVSGSPGQSVTISCT-GTSSD--V-GSYNR-VSWYQQPPGTA
P-KLMIYEVS-N----RP---SGVPDRFSGSK-----SGNTASLTISGLQAEDEADYYCS
SYTSS---
>Vs466-Homo_sapiens-ABBA01055094.1-iglv
-----SWAQSALTQP--ASVSGSPGQSITISCT-GTSSD--V-GSYNL-VSWYQQHPGKA
P-KLMIYEVS-K----RP---SGVSNRFSGSK-----SGNTASLTISGLQAEDEADYYCC
SYAGS---
>Vs460-Homo_sapiens-ABBA01055083.1-iglv
-----SNSQTVVTQE--PSLTVSPGGTVTLTCA-SSTGA--V-TSGYY-PNWFQQKPGQA
P-RALIYSTS-N----KH---SWTPARFSGSL-----LGGKAALTLSGVQPEDEAEYYCL
LYYGGA--
>Vs461-Homo_sapiens-ABBA01055084.1-iglv
-----SWAQSVLTQP--PSVSGAPGQRVTISCT-GSSSN--I-GAGYD-VHWYQQLPGTA
P-KLLIYGNS-N----RP---SGVPDRFSGSK-----SGTSASLAITGLQAEDEADYYCQ
SYDSSLSG
>Vs462-Homo_sapiens-ABBA01055084.1-iglv
-----SWAQSVLTQP--PSVSEAPRQRVTISCS-GSSSN--I-GNNA--VNWYQQLPGKA
P-KLLIYYDD-L----LP---SGVSDRFSGSK-----SGTSASLAISGLQSEDEADYYCA
AWDDSLNG
>Vs463-Homo_sapiens-ABBA01055087.1-iglv
------SWAQSALTQ-PPFVSGAPGQSVTISCT-GTSSDV----GDYDHVFWYQKRLSTT
S-RLLIY------NVNTRP--SGISDLFSGSKSG-----NMASLTISGLKSEVEANYHCS
LYSSS---
>Vs454-Homo_sapiens-ABBA01055083.1-iglv
-----SWAQSVLTQP--PSVSGAPGQRVTISCT-GSSSN--I-GAGYV-VHWYQQLPGTA
P-KLLIYGNS-N----RP---SGVPDQFSGSK-----SGTSASLAITGLQSEDEADYYCK
AWDNSLN-
>Vs456-Homo_sapiens-ABBA01055083.1-iglv
-----SWAQSVLTQP--PSASGTPGQRVTISCS-GSSSN--I-GSNY--VYWYQQLPGTA
P-KLLIYSNN-Q----RP---SGVPDRFSGSK-----SGTSASLAISGLRSEDEADYYCA
AWDDSLSG
>Vs459-Homo_sapiens-ABBA01055083.1-iglv
-----SWAQSVLTQP--PSASGTPGQRVTISCS-GSSSN--I-GSNT--VNWYQQLPGTA
P-KLLIYSNN-Q----RP---SGVPDRFSGSK-----SGTSASLAISGLQSEDEADYYCA
AWDDSLNG
>Vs470-Homo_sapiens-ABBA01055094.1-iglv
-----SEASYELTQP--PSVSVSLGQMARITCS-GEA----L-PK-KY-AYWYQQKPGQF
P-VLVIYKDS-E----RP---SGIPERFSGSS-----SGTIVTLTISGVQAEDEADYYCL
SADSSGTY
>Vs715-Homo_sapiens-ABBA01010264.1-iglv
------SLSQPVLTQ-PTSLSASPGASARFTCT-LRSGIN---VGTYR-IYWYQQKPGSL
P-RYLLRYKS-D-SDKQQG--SGVPSRFSGSKDA---STNAGLLLISGLQSEDEADYYCA
IWYS----
>Vs464-Homo_sapiens-ABBA01055094.1-iglv
-----SVASYELTQP--SSVSVSPGQTARITCS-GDV----L-AK-KY-ARWFQQKPGQA
P-VLVIYKDS-E----RP---SGIPERFSGSS-----SGTTVTLTISGAQVEDEADYYCY
SAADNN--
>Vs478-Homo_sapiens-ABBA01055098.1-iglv
------LCALPVLTQ-PPSASALLGASIKLTCT-LSSEHS-----TYT-IEWYQQRPGRS
P-QYIMKVKS-D-GSHSKG--DGIPDRFMGSSSG-----ADRYLTFSNLQSDDEAEYHCG
E-------
>Vs465-Homo_sapiens-ABBA01055094.1-iglv
-----SEASYELTQP--PSVSVSPGQTARITCS-ADA----L-PK-QY-AYWYQQKPGQA
P-VLVIYKDS-E----RP---SGIPERFSGSS-----SGTTVTLTISGVQAEDEADYYCQ
SADSSGTY
>Vs467-Homo_sapiens-ABBA01055094.1-iglv
-----SVTSYVLTQP--PSVSVAPGKTARITCG-GNN----I-GS-KS-VHWYQQKPGQA
P-VLVVYDDS-D----RP---SGIPERFSGSN-----SGNTATLTISRVEAGDEADYYCQ
VWDSSSDH
>Vs45-Mus_m2-130694993-iglv
--------FQPTLTQ-PDAFSVFPGQDAHLSCT-INSQHAT--AGDIG-VSWYQQQPGSA
P-HLL-YYYA-E-EEHYRP--ADIPDRFSATVDA---AHNACILTISPVLPEDDADYFCS
I-------
>Vs904-Mus_m2-98207768-iglv
------AISQAVVTQ-ESALTTSPGETVTLTCR-SSTGAVT--TS-NY-ANWVQEKPDHL
F-----TGLI-G-GTNNRA--PGVPARFSGSLIG-----DKAALTITGAQTEDEAIYFCA
LWYSNH--
>Vs903-Mus_m2-98207768-iglv
------ASSQAVVTQ-ESALTTSPGGTVILTCR-SSTGAVT--TS-NY-ANWVQEKPDHL
F-----TGLI-G-GTSNRA--PGVPVRFSGSLIG-----DKAALTITGAQTEDDAMYFCA
LWY-----
>Vs280-Mus_m2-98207768-iglv
------CGPQPMVHQ-PPSASSSLGATIRLSCT-LSNDHN---IGIYS-IYWYQQRPGHP
P-RFLLRYFS-H-SDKHQG--PDIPPRFSGSKDT---ARNLGYLSISELQPEDEAVYYCA
VGLR----
>Vs535-Homo_sapiens-ABBA01061266.1-trav
-----GTRAQSVTQL-DSHVSVSEGTPVLLRCN-YSS--S----YSPS-LFWYVQHPNKG
L-QLLLKYTS-A-ATL-----VKGINGFEAEFKK---SETSFHLTKPSAHMSDAAEYFCV
VS------
>Vs557-Homo_sapiens-ABBA01061272.1-trav
------IMGDAKTTQ-PNSMESNEEEPVHLPCN-HST---I--SGTDY-IHWYRQLPSQG
P-EYVIHGLT-S---------NVNNRMASLAIAE---DRKSSTLILHRATLRDAAVYYCI
LR------
>Vs532-Homo_sapiens-ABBA01061266.1-trav
-----GNGKNQVEQS-PQSLIILEGKNCTLQCN-YTV---S---PFSN-LRWYKQDTGRG
P-VSLTIMTF-S----EN---TKSNGRYTATLDA---DTKQSSLHITASQLSDSASYICV
VS------
>Vs533-Homo_sapiens-ABBA01061266.1-trav
-----VNRLHTLEQS-PSFLNIQEGMHAVLNCT-YQE---R---TLFN-FHWFRQDPGRR
L-VSLTLIQS-S----QK---EQGDKYFKELLGK---EKFYSVWNIAASHLGDSATYFCA
LQ------
>Vs530-Homo_sapiens-ABBA01061266.1-trav
-----DARAQSVSQH-NHHVILSEAASLELGCN-YSY--G----GTVN-LFWYVQYPGQH
L-QLLLKYFS-G-DPL-----VKGIKGFEAEFIK---SKFSFNLRKPSVQWSDTAEYFCA
VN------
>Vs531-Homo_sapiens-ABBA01061266.1-trav
-----GINGDSVVQT-EGQVLPSEGDSLIVNCS-YET--T----QYPS-LFWYVQYPGEG
P-QLHLKAMK-A-ND------KGRNKGFEAMYRK---ETTSFHLEKDSVQESDSAVYFCA
LS------
>Vs524-Homo_sapiens-ABBA01061265.1-trav
MYLVLGTTGQNIDQ--PTEMTATEGAIVQINCT-YQT---S---GFNG-LFWYQQHAGEA
P-TFLSYNVL-D----GL---E-EKGRFSSFLSR---SKGYSYLLLKELQMKDSASYLCA
VR------
>Vs542-Homo_sapiens-ABBA01061267.1-trav
-----PGIAQKITQT-QPGMFVQEKEAVTLDCT-YDT---S--DQSYG-LFWYKQPSSGE
M-IFLIYQGS-Y---DEQ---NATEGRYSLNFQK---ARKSANLVISASQLGDSAMYFCA
MRE-----
>Vs527-Homo_sapiens-ABBA01061266.1-trav
-----MSRGEDVEQS--LFLSVREGDSSVINCT-YTD---S---SSTY-LYWYKQEPGAG
L-QLLTYIFS-N----MD---MKQDQRLTVLLNK---KDKHLSLRIADTQTGDSAIYFCA
ES------
>Vs541-Homo_sapiens-ABBA01061267.1-trav
-----VSRGESVGLH-LPTLSVQEGDNSIINCA-YSN---S---ASDY-FIWYKQESGKG
P-QFIIDIRS-N----MD---KRQGQRVTVLLNK---TVKHLSLQIAATQPGDSAVYFCA
EN------
>Vs561-Homo_sapiens-ABBA01061272.1-trav
-----SGMAQTVTQS-QPEMSVQEAETVTLSCT-YDT---S--ENNYY-LFWYKQPPSRQ
M-ILVIRQEA-Y---KQQ---NATENRFSVNFQK---AAKSFSLKISDSQLGDTAMYFCA
FM------
>Vs563-Homo_sapiens-ABBA01061273.1-trav
-----LSGELKVEQN-PLFLSMQEGKNYTIYCN-YST---T---S-DR-LYWYRQDPGKS
L-ESLFVLLS-N----GA---VKQEGRLMASLDT---KARLSTLHITAAVHDLSATYFCA
V-------
>Vs562-Homo_sapiens-ABBA01061272.1-trav
-----FSMAQTVTQS-QPEMSVQEAETVTLSCT-YDT---S--ESDYY-LFWYKQPPSRQ
M-ILVIRQEA-Y---KQQ---NATENRFSVNFQK---AAKSFSLKISDSQLGDAAMYFCA
YRS-----
>Vs565-Homo_sapiens-ABBA01061274.1-trav
----VSAAKNEVEQS-PQNLTAQEGEFITINCS-YSV---G---I-SA-LHWLQQHPGGG
I-VSLFMLSS-G-----K---K-KHGRLIATINI---QEKHSSLHITASHPRDSAVYICA
V-------
>Vs564-Homo_sapiens-ABBA01061273.1-trav
------GTSSNSVKQ-TGQITVSEGASVTMNCT-YTS---T---GYPT-LFWYVEYPSKP
L-QLLQRETM-E-NSKNFG----------GGN----IKDKNSPIVKYSVQVSDSAVYYCL
LGDTVLK-
>Vs525-Homo_sapiens-ABBA01061266.1-trav
-----GLRAQSVAQP-EDQVNVAEGNPLTVKCT-YSV--S----GNPY-LFWYVQYPNRG
L-QFLLKYIT-G-DNL-----VKGSYGFEAEFNK---SQTSFHLKKPSALVSDSALYFCA
VR------
>Vs523-Homo_sapiens-ABBA01061263.1-trav
------TAGQSLEQ--PSEVTAVEGAIVQINCT-YQT---S---GFYG-LSWYQQHDGGA
P-TFLSYNAL-D----GL---E-ETGRFSSFLSR---SDSYGYLLLQELQMKDSASYFCA
VR------
>Vs545-Homo_sapiens-ABBA01061267.1-trav
-----GTRAQSVTQL-DSQVPVFEEAPVELRCN-YSS--S----VSVY-LFWYVQYPNQG
L-QLLLKYLS-G-STL-----VKGINGFEAEFNK---SQTSFHLRKPSVHISDTAEYFCA
VS------
>Vs544-Homo_sapiens-ABBA01061267.1-trav
----VWSQQKEVEQD-PGPLSVPEGAIVSLNCT-YSN---S---AFQY-FMWYRQYSRKG
P-ELLMYTYS-S----G----NKEDGRFTAQVDK---SSKYISLFIRDSQPSDSATYLCA
MS------
>Vs549-Homo_sapiens-ABBA01061268.1-trav
-----VSSKQEVTQI-PAALSVPEGENLVLNCS-FTD---S---AIYN-LQWFRQDPGKG
L-TSLLLIQS-S----QR---EQTSGRLNASLDK---SSGRSTLYIAASQPGDSATYLCA
V-------
>Vs548-Homo_sapiens-ABBA01061268.1-trav
-----LSGEDQVTQS-PEALRLQEGESSSLNCS-YTV---S---GLRG-LFWYRQDPGKG
P-EFLFTLYS-A----GE---EKEKERLKATLTK---K--ESFLHITAPKPEDSATYLCA
VQ------
>Vs550-Homo_sapiens-ABBA01061268.1-trav
------VRGIQVEQS-PPDLILQEGANSTLRCN-FSD---S---V-NN-LQWFHQNPWGQ
L-INLFYIPS-G-----T---K-QNGRLSATTVA---TERYSLLYISSSQTTDSGVYFCA
VEPQCSP-
>Vs552-Homo_sapiens-ABBA01061270.1-trav
-----VSSILNVEQS-PQSLHVQEGDSTNFTCS-FPS---S---NFYA-LHWYRWETAKS
P-EALFVMTL-N----GD---EKKKGRISATLNT---KEGYSYLYIKGSQPEDSATYLCA
F-------
>Vs553-Homo_sapiens-ABBA01061270.1-trav
------VNGQQVMQI-PQYQHVQEGEDFTTYCN-S-S---T---TLSN-IQWYKQRPGGH
P-VFLIQLVK-S----GE---VKKQKRLTFQFGE---AKKNSSLHITATQTTDVGTYFCA
--------
>Vs554-Homo_sapiens-ABBA01061270.1-trav
------TIIDAKTTQ-PTSMDCAEGRAANLPCN-HST---I--SGNEY-VYWYRQIHSQG
P-QYIIHGLK-N---------NETNEMASLIITE---DRKSSTLILPHATLRDTAVYYCI
VRV-----
>Vs555-Homo_sapiens-ABBA01061271.1-trav
------VSTQLLEQS-PQFLSIQEGENLTVYCN-S-S---S---VFSS-LQWYRQEPGEG
P-VLLVTVVT-G----GE---VKKLKRLTFQFGD---ARKDSSLHITAAQPGDTGLYLCA
G-------
>Vs558-Homo_sapiens-ABBA01061272.1-trav
------VSSQELEQS-PQSLIVQEGKNLTINCT-S-S---K---TLYG-LYWYKQKYGEG
L-IFLMMLQK-G----GE---EKSHEKITAKLDE---KKQQSSLHITASQPSHAGIYLCG
A-------
>Vs559-Homo_sapiens-ABBA01061272.1-trav
------VSGQQLNQS-PQSMFIQEGEDVSMNCT-S-S---S---IFNT-WLWYKQDPGEG
P-VLLIALYK-A----GE---LTSNGRLTAQFGI---TRKDSFLNISASIPSDVGIYFCA
G-------
>Vs1006-Homo_sapiens-ABBA01053779.1-trav
---VAGEEELQVIQP-DKSISVAAGESATLHCT-VTS---L--IPVGP-IQWFRGAGPGR
ELIYNQKEGH-F----------PRVTTVSDLTKR---NNMDFSIRISNITPADAGTYYCV
KFRKGSP-
>Vs543-Homo_sapiens-ABBA01061267.1-trav
-----RTRGNSVTQM-EGPVTLSEEAFLTINCT-YTA--T----GYPS-LFWYVQYPGEG
L-QLLLKATK-A-DD------KGSNKGFEATYRK---ETTSFHLEKGSVQVSDSAVYFCA
LS------
>Vs540-Homo_sapiens-ABBA01061267.1-trav
LKFLSFVLCPFISQA-SQNLGKIEKNLCDYRGR-FPN--T----ATPS-LFWHVQSPGQG
L-QLLLKYFS-G-DTL-----VQGIEGFEAEFKR---SQSSFNLRRPSVHWSDAAEYFCA
AG------
>Vs529-Homo_sapiens-ABBA01061266.1-trav
-----ANGENQVEHS-PHFLGPQQGDVASMSCT-YSV---S---RFNN-LQWYRQNTGMG
P-KHLLSMYS-A----GY---EKQKGRLNATLLK---N--GSSLYITAVQPEDSATYFCA
VD------
>Vs528-Homo_sapiens-ABBA01061266.1-trav
------VKSQKIEQN-SEALNIQEGKTATLTCN-YTN---Y---SPAY-LQWYRQDPGRG
P-VFLLLIRE-N----EK---EKRKERLKVTFDT---TLKQSLFHITASQPADSATYLCA
L-------
>Vs560-Homo_sapiens-ABBA01061272.1-trav
-----VSSEDKVVQS-PLSLVVHEGDTVTLNCS-YEV---T---NFRS-LLWYKQEK-KA
P-TFLFMLTS-S----GI---EKKSGRLSSILDK---KELFSILNITATQTGDSAVYLCA
VE------
>Vs526-Homo_sapiens-ABBA01061266.1-trav
------TLSLAKTTQ-PISMDSYEGQEVNITCS-HNN---I--ATNDY-ITWYQQFPSQG
P-RFIIQGYK-T---------KVTNEVASLFIPA---DRKSSTLSLPRVSLSDTAVYYCL
VG------
>Vs1077-Homo_sapiens-ABBA01061638.1-trav
-------MMTGTIET-TGNVSAEKGGSIILQCH-LSSTTA-----QVTQVNWEQQDQLLA
------ICNA-D-LGWHIS--PSFKDRVAPG--------PGLGLTLQSLTVNDTGEYFCI
YHTYPDGT
>Vs536-Homo_sapiens-ABBA01061266.1-trav
-----TARAQSVTQP-DIHITVSEGASLELRCN-YSY--G----ATPY-LFWYVQSPGQG
L-QLLLKYFS-G-DTL-----VQGIKGFEAEFKR---SQSSFNLRKPSVHWSDAAEYFCA
VG------
>Vs537-Homo_sapiens-ABBA01061266.1-trav
------VNGENVEQH-PSTLSVQEGDSAVIKCT-YSD---S---ASNY-FPWYKQELGKG
P-QLIIDIRS-N----VG---EKKDQRIAVTLNK---TAKHFSLHITETQPEDSAVYFCA
AS------
>Vs547-Homo_sapiens-ABBA01061267.1-trav
------VNSQQGEED-PQALSIQEGENATMNCS-YKT---S---I-NN-LQWYRQNSGRG
L-VHLILIRS-N----ER---EKHSGRLRVTLDT---SKKSSSLLITASRAADTASYFCA
TD------
>Vs538-Homo_sapiens-ABBA01061266.1-trav
----VWSQQKEVEQN-SGPLSVPEGAIASLNCT-YSD---R---GSQS-FFWYRQYSGKS
P-ELIMFIYS-N----G----DKEDGRFTAQLNK---ASQYVSLLIRDSQPSDSATYLCA
V-------
>Vs539-Homo_sapiens-ABBA01061266.1-trav
-----GTRAQSVTQL-GSHVSVSEGALVLLRCN-YSS--S----VPPY-LFWYVQYPNQG
L-QLLLKYTT-G-ATL-----VKGINGFEAEFKK---SETSFHLTKPSAHMSDAAEYFCA
VS------
>Vs546-Homo_sapiens-ABBA01061267.1-trav
-----GTRAQRVTQP-EKLLSVFKGAPVELKCN-YSY--S----GSPE-LFWYVQYSRQR
L-QLLLRHIS-R-E---------SIKGFTADLNK---GETSFHLKKPFAQEEDSAMYYCA
LS------
>Vs556-Homo_sapiens-ABBA01061271.1-trav
------VRSQQPVQS-PQAVILREGEDAVINCS-S-S---K---ALYS-VHWYRQKHGEA
P-VFLMILLK-G----GE---QKGHEKISASFNE---KKQQSSLYLTASQLSYSGTYFCG
TE------
>Vs534-Homo_sapiens-ABBA01061266.1-trav
----VWSQRKEVEQD-PGPFNVPEGATVAFNCT-YSN---S---ASQS-FFWYRQDCRKE
P-KLLMSVYS-S----GN---E--DGRFTAQLNR---ASQYISLLIRDSKLSDSATYLCV
V-------
>Vs213-Mus_m2-124902244-trav
-----VNSQQKVQQS-PESLIVPEGAMTSLNCT-FSD---S---ASQY-FAWYRQHSGKA
P-KALMSIFS-N----G----EKEEGRFTIHLNK---ASLHFSLHIRDSQPSDSALYLCA
V-------
>Vs212-Mus_m2-124902244-trav
-----RTHGDSVIQM-QGQVTLSENDFLFINCT-YST--T----GYPT-LFWYVQYSGEG
P-QLLLQVTT-A-NN------KGSSRGFEATYDK---GTTSFHLQKTSVQEIDSAVYYCA
MR------
>Vs211-Mus_m2-124902244-trav
-----GVRGMPVEQN-PPALSLYEGAESGLRCN-FST---T---M-KG-VQWFQQNHRGR
L-ITLFYLAQ-G-----T---K-ENGRLKSTFNS---KERYSTLHIKDAQLEDSGTYFCA
VE------
>Vs210-Mus_m2-124902244-trav
-----VNSQQKVQQS-PESLIVPEGGMASLNCT-SSD---R---NVDY-FWWYRQHSGKS
P-KMLMSIFS-N----G----EKEEGRFTVHLNK---ASLHTSLHIRDSQPSDSALYLCA
A-------
>Vs216-Mus_m2-124902244-trav
------VNSQLAEEN-SWALSVHEGESVTVNCS-YKT---S---I-TA-LQWYRQKSGKG
P-AQLILIRS-N----ER---EKRNGRLRATLDT---SSQSSSLSITATRCEDTAVYFCA
TD------
>Vs215-Mus_m2-124902244-trav
-----VRSQQKVQQS-PESLSVPEGGMASLNCT-SSD---R---NFQY-FWWYRQHSGEG
P-KALMSIFS-D----G----DKKEGRFTAHLNK---ASLHVSLHIRDSQPSDSALYFCA
AS------
>Vs214-Mus_m2-124902244-trav
---MRKTHGDSVTQK-QGQVTLSEDDFLFINCT-YST--T----TYPT-LLWYVQYLGQG
P-QLLLKVTT-A-NN------KGISRGFEATYDK---GTTSFHLQKASVQESDSAVYFCA
LV------
>Vs219-Mus_m2-124902244-trav
-----ESHGEKVEQH-ESTLSVREGDSAVINCT-YTD---T---ASSY-FPWYKQEAGKS
L-HFVIDIRS-N----VD---RKQSQRLIVLLDK---KAKRFSLHITATQPEDSAIYFCA
A-------
>Vs218-Mus_m2-124902244-trav
-----ESNGDSVTQT-EGPVTLSEGTSLTVNCS-YET--K----QYPT-LFWYVQYPGEG
P-QLLFKVPK-A-NE------KGSNRGFEATYNK---EATSFHLQKASVQESDSAVYYCA
LS------
>Vs217-Mus_m2-124902244-trav
------VQTQTVSQS-DAHVTVFEGDSVELRCN-YSY--G----GSIY-LSWYIQHHGHG
L-QFLLKYYS-G-NPV-----VQGVNGFEAEFSK---SDSSFHLRKASVHWSDSAVYFCA
VS------
>Vs158-Mus_m2-124902244-trav
-----VRSQQKVQQS-PESLSVPEGGMASLNCT-SSD---R---NFQY-FWWYRQHSGEG
P-KALMSIFS-D----G----DKKEGRFTAHLNK---ASLHVSLHIRDSQPSDSALYFCA
AS------
>Vs159-Mus_m2-124902244-trav
------VNSQLAEEN-LWALSVHEGESVTVNCS-YKT---S---I-TA-LQWYRQKSGEG
P-AQLILIRS-N----ER---EKRNGRLRATLDT---SSQSSSLSITATRCEDTAVYFCA
TD------
>Vs154-Mus_m2-124902244-trav
-----VNSQQKVQQS-PESLIVPEGGMASLNCT-SSD---R---NVDY-FWWYRQHSGKS
P-KMLMSIFS-N----G----EKEEGRFTVHLNK---ASLHTSLHIRDSQPSDSALYLCA
A-------
>Vs155-Mus_m2-124902244-trav
-----RTHGDSVIQM-QGQVTLSENDFLFINCT-YST--T----GYPT-LFWYVQYSGEG
P-QLLLQVTT-A-NN------KGSSRGFEATYDK---GTTSFHLQKTSVQEIDSAVYYCA
MS------
>Vs156-Mus_m2-124902244-trav
-----VNSQQKVQQS-PESLIVPEGAMTSLNCT-FSD---S---ASQY-FAWYRQHSGKA
P-KALMSIFS-N----G----EKEEGRFTIHLNK---ASLHFSLHIRDSQPSDSALYLCA
V-------
>Vs157-Mus_m2-124902244-trav
---MRKTHGDSVTQK-QGQVTLSEDDFLFINCT-YST--T----TYPT-LFWYVQYPGQG
P-QLLLKVTT-A-NN------KGISRGFEATYDK---GTTSFHLQKASVQESDSAVYFCA
LV------
>Vs150-Mus_m2-124902244-trav
-----KSQGEQVEQL-PSSLIVQEGASVLINCS-YTD---S---ASVY-FPWYKQEPGKR
L-QFIIDIRS-N----ME---RKQTQRLTLLFDK---KTKHLSLHITATQPGDSAIYFCS
AS------
>Vs151-Mus_m2-124902244-trav
-----RTHGDSVTQM-QGQVTLSEDDFLFINCT-YST--T----WYPT-LFWYVQYPGEG
P-QLLLKVTT-A-NN------KGISRGFEATYDK---GTTSFHLQKASVQESDSAVYYCV
LG------
>Vs152-Mus_m2-124902244-trav
-----VNSQQKVQQS-PESLIVPEGGMASLNCT-FSD---R---NSQY-FWWYRQHSGEG
P-KALMSIFS-N----G----DKKEGRFTAHLNK---ASLHVSLHIKDSQPSDSALYFCA
V-------
>Vs153-Mus_m2-124902244-trav
-----RTHGNSVTQM-QGQVTLSEEEFLFINCT-YST--T----GYPT-LFWYVQYPGEG
P-QLLLKVTT-A-NN------KGSSRGFEATYDK---GTTSFHLQKASVQESDSAVYYCV
LG------
>Vs189-Mus_m2-124902244-trav
-----VRSQQKVQQS-PESLTVSEGAMASLNCT-FSD---R---SSDN-FRWYRQHSGKG
L-EVLVSIFS-D----G----EKEEGSFTAHLNR---ASLHVFLHIREPQPSDSALYLCA
V-------
>Vs188-Mus_m2-124902244-trav
-----RTHGDSVTQT-EGQVTVSESKSLIINCT-YSATSI----GYPN-LFWYVRYPGEG
L-QLLLKVIT-A-GQ------KGSSRGFEATYNK---EATSFHLQKASVQESDSAVYYCA
LS------
>Vs187-Mus_m2-124902244-trav
-----ESHGEKVEQH-ESTLSVREGDSAVINCT-YTD---T---ASSY-FPWYKQEAGKS
L-HFVIDIRS-N----VD---RKQSQRLTVLLDK---KAKRFSLHITATQPEDSAIYFCA
A-------
>Vs186-Mus_m2-124902244-trav
-----ESNGDSVTQT-EGPVTLSEGTSLTVNCS-YET--K----QYPT-LFWYVQYPGEG
P-QLLFKVPK-A-NE------KGSNRGFEATYNK---EATSFHLQKASVQESDSAVYYCA
LG------
>Vs185-Mus_m2-124902244-trav
-----VKSQQKVQQS-PESLSVPEGGMASLNCT-SSD---R---NFQY-FWWYRQHSGEG
P-KALMSIFS-D----G----DKKEGRFTAHLNK---ASLHVSLHIRDSQPSDSALYFCA
VS------
>Vs184-Mus_m2-124902244-trav
------VKGQQVQQS-PASLVLQEGENAELQCN-FSS---T---A-TR-LQWFYQRPGGS
L-VSLLYNPS-G-----T---K-HTGRLTSTTVT---KERRSSLHISSSQTTDSGTYFCA
MEPQCS--
>Vs183-Mus_m2-124902244-trav
-----TSMAQKVTQT-QTSISVMEKTTVTMDCV-YET---Q--DSSYF-LFWYKQTASGE
I-VFLIRQDS-Y---KKE---NATVGHYSLNFQK---PKSSIGLIITATQIEDSAVYFCA
MRE-----
>Vs182-Mus_m2-124902244-trav
------AKSQWGEEN-LQALSIQEGEDVTMNCS-YKT---Y---T-TV-VHWYRQDSGRG
P-ALIILIRS-N----ER---EKRSGRLRATLDT---SSQSSSLSITAAQCEDTAVYFCA
TD------
>Vs181-Mus_m2-124902244-trav
------VKGQQVQQSPPASLVLQEGENAELQCT-YST---T---L-NS-MQWFYQRPGGR
L-VSLLYSPS-W-----A---EQRGGRLTSSAAS---NESRSSLHISSSQITDSGTYLCA
ME------
>Vs180-Mus_m2-124902244-trav
-----VSSQEKVQQS-PESLIVPEGAMSSLNCT-FSN---S---ASQS-IWWYQQHPGKG
P-EALISIFS-N----G----NKKEGRLTVYLNR---ASLHVSLHIRDSQPSDSAVYLCA
V-------
>Vs165-Mus_m2-124902244-trav
-----VRSQQKVQQS-PESLTVSEGAMASLNCT-FSD---R---SSDN-FRWYRQHSGKG
L-EVLVSIFS-D----G----EKEEGSFTAHLNR---ASLHVFLHIREPQPSDSALYLCA
V-------
>Vs164-Mus_m2-124902244-trav
-----VAGKTQVEQS-PQSLVVRQGENCVLQCN-YSV---T---PDNH-LRWFKQDTGKG
L-VSLTVLVD-Q----KD---KTSNGRYSATLDK---DAKHSTLHITATLLDDTATYICV
VG------
>Vs167-Mus_m2-124902244-trav
------VKGQQVQQS-PTSLVLQEGENAELQCN-FST---S---L-NS-MQWFYQRPGGS
L-VSVFYNPS-G-----T---K-QSGRLTSTTVI---KERRSSLHISSSQITDSGTYLCA
MEPQCS--
>Vs166-Mus_m2-124902244-trav
-----RSNGDSVTQT-EGLVTVTEGLPVMLNCT-YQTA-Y----SDVA-FFWYVQYLNEA
P-KLLLRSST-D-NK------RTEHQGFHATLHK---SSSSFHLQKSSVQLSDSALYYCA
LS------
>Vs161-Mus_m2-124902244-trav
-----ESNGDSVTQT-KGPVTLSEGTSLTVNCS-YET--K----QYPT-LFWYVQYPGEG
P-QLLFKVPK-A-NE------KGSNRGFEATYDK---GTTSFHLQKASVQESDSAVYYCV
LG------
>Vs160-Mus_m2-124902244-trav
------VQTQTVSQS-DAHVTVFEGDSVELRCN-YSY--G----GSIY-LSWYIQHHGRG
L-QFLLKYYS-G-NPV-----VQGVNGFKAEFSK---SDSSFHLRKASVHWSDSAVYFCA
VS------
>Vs163-Mus_m2-124902244-trav
-----RTHGDSVTQT-EGPVTVSESESLIINCT-YSATSI----AYPN-LFWYVRYPGEG
L-QLLLKVIT-A-GQ------KGSSRGFEATYNK---ETTSFHLQKASVQESDSAVYYCA
LG------
>Vs162-Mus_m2-124902244-trav
-----ESHGEKVEQH-ESTLSVREGDSAVINCT-YTD---T---ASSY-FPWYKQEAGKS
L-HFVIDIRS-N----VD---RKQSQRLIVLLDK---KAKRFSLHITATQPEDSAIYFCA
A-------
>Vs204-Mus_m2-124902244-trav
-----RAHGDSVTQT-EGQVALSEEDFLTIHCN-YSA--S----GYPA-LFWYVQYPGEG
P-QFLFRASR-D-KE------KGSSRGFEATYDK---GTTSFHLRKASVQESDSAVYYCA
LG------
>Vs205-Mus_m2-124902244-trav
-----VSSQEKVQQS-PESLIVPEGAMSSLNCT-FSN---S---ASQS-IWWYQQHPGKG
P-EALISIFS-N----G----NKKEGRLTVYLNR---ASLHVSLHIRDSQPSDSAVYLCA
V-------
>Vs206-Mus_m2-124902244-trav
------VKGQQVQQSPPASLVLQEGENAELQCT-YST---T---L-NS-MQWFYQRPGGR
L-VSLLYSPS-W-----A---EQRGGRLTSSAAS---NESRSSLHISSSQITDSGTYLCA
ME------
>Vs207-Mus_m2-124902244-trav
------AKSQWGEEN-LQALSIQEGEDVTMNCS-YKT---Y---T-TV-VQWYRQKSGKG
P-AQLILIRS-N----ER---EKRSGRLRATLDT---SSQSSSLSITGTLATDTAVYFCA
TD------
>Vs169-Mus_m2-124902244-trav
-----DAQAQSVTQP-DARVTVSEGASLQLRCK-YSS--S----GTPY-LFWYVQYPRQG
L-QLLLKYYS-G-DPV-----VQGVNGFEAEFSK---SNSSFHLRKASVHWSDSAVYFCV
LS------
>Vs202-Mus_m2-124902244-trav
-----GVRGDQVEQS-PSALSLHEGTGSALRCN-FTT---T---M-RA-VQWFRKNSRGS
L-INLFYLAS-G-----T---K-ENGRLKSAFDS---KERYSTLHIRDAQLEDSGTYFCA
AE------
>Vs203-Mus_m2-124902244-trav
-----MSQGEQVEQL-PSILRVQEGSSASINCT-YEN---S---ASNY-FPWYKQEPGEN
P-KLIIDIRS-N----ME---RKQTQGLIVLLDK---KAKRFSLHITDTQPGDSAMYFCA
AS------
>Vs190-Mus_m2-124902244-trav
-----RSNGDSVTQT-EGLVTVTEGLPVMLNCT-YQTA-Y----SDVA-FFWYVQYLNEA
P-KLLLRSST-D-NK------RTEHQGFHATLHK---SSSSFHLQKSSVQLSDSALYYCA
LS------
>Vs193-Mus_m2-124902244-trav
-----DAQAQSVTQP-DARVTVSEGASLQLRCK-YSS--S----GTPY-LFWYVQYPRQG
L-QLLLKYYS-G-DPV-----VQGVNGFEAEFSK---SNSSFHLRKASVHWSDSAVYFCV
LS------
>Vs194-Mus_m2-124902244-trav
-----GVSGDKVKQS-PSALSLQEGTNSALRCN-FSI---A---A-TT-VQWFLQNPRGS
L-MNLFYLVP-G-----T---K-ENGRLKSAFDS---KESYSTLHIRDAQLEDSGTYFCA
AE------
>Vs195-Mus_m2-124902244-trav
-----RSNGDSVTQT-EGLVTLTKGLPVMLNCT-YQTT-Y----S-PF-LFWYVQHLNEA
P-KLLLKSST-D-NK------RTEHQGFYATLHK---SSSSFHLQKSSVQLSDSALYFCA
LS------
>Vs196-Mus_m2-124902244-trav
-----DAQAQSVTQP-DARVTVSEGASLQLRCK-YSY--F----GTPY-LFWYVQYPRQG
L-QLLLKYYP-G-DPV-----VQGVNGFEAEFSK---SNSSFHLRKASVHWSDWAVYFCA
V-------
>Vs197-Mus_m2-124902244-trav
---RSNGDGDSVTQT-EGLVTLTEGLPVMLNCT-YQTI-Y----SNPF-LFWYVQHLNES
P-RLLLKSFT-D-NK------RTEHQGFHATLHK---SSSSFHLQKSSAQLSDSALYYCA
LS------
>Vs235-Mus_m2-124902244-trav
-----MSQGEQVEQL-PSILRVQEGSSASINCS-YED---S---ASNY-FPWYKQEPGEN
P-KLIIDIRS-N----ME---RKQIQELIVLLDK---KAKRFSLHITDTQPGDSAMYFCA
AS------
>Vs234-Mus_m2-124902244-trav
-----GVRGDQVEQS-PSALSLHEGTGSALRCN-FTT---T---M-RA-VQWFQQNSRGS
L-INLFYLAS-G-----T---K-ENGRLKSTFNS---KESYSTLHIRDAQLEDSGTYFCA
AE------
>Vs237-Mus_m2-124902244-trav
-----VSSQEKVQQS-PESLIVPEGAMVSLNCS-FSD---S---ASQS-IWWYQQHPGKG
P-KALISIFS-N----G----NKKEGRLTVYLNR---ASLHVSLHIKDSQPSDSAVYLCA
V-------
>Vs236-Mus_m2-124902244-trav
-----RAHGDSVTQT-EGQVALSEEDFLTIHCN-YSA--S----GYPT-LFWYVQYPGEG
P-QLLFRASR-D-KE------KGSSRGFEATYDK---GTTSFHLRKASVQESDSAVYYCA
LS------
>Vs230-Mus_m2-124902244-trav
------VKGQQVQQS-PASLVLQEGENAELQCN-FSS---T---A-TR-LQWFYQHPGGR
L-VSLFYNPS-G-----T---K-HTGRLTSTTVT---NERRSSLHISSSQTTDSGTYFCA
IDPQCS--
>Vs233-Mus_m2-124902244-trav
-----DAQAQSVTQP-DARVTVSEGASLQLRCK-YSY--S----GTPY-LFWYVQYPRQG
L-QLLLKYYS-G-DPV-----VQGVNGFEAEFIK---SNSSFHLRKASVHWSDSAVYFCA
VS------
>Vs232-Mus_m2-124902244-trav
-----VSRGEQVEQR-PPHLSVREGDSAVITCT-YTD---P---NSYY-FFWYKQEPGAS
L-QLLMKVFS-S----TE---INEGQGFTVLLNK---KDKRLSLNLTAAHPGDSAAYFCA
VS------
>Vs239-Mus_m2-124902244-trav
-----TSMAQKVTQT-QTSISVMEKTTVTMDCV-YET---R--DSSYF-LFWYKQTASGE
I-VFLIRQDS-Y---KKE---NATEGHYSLNFQK---PKSSIGLIITATQIEDSAVYFCA
MRE-----
>Vs238-Mus_m2-124902244-trav
------AKSQWGEEN-LQALSIQEGEDVTMNCS-YKT---Y---T-TV-VQWYRQKSGEG
P-TLVILIRS-N----ER---EKRSGRLRATLDT---SSQSSSLSITAAQCEDTAVYFCA
TD------
>Vs240-Mus_m2-124902244-trav
------VKGQQVQQS-PASLVLQEGENAELQCN-FSS---T---A-TR-LQWFYQRPGGS
L-VSLLSNPS-G-----T---K-HTGRLTSTTVT---KERRGSLHISSSQITDSGTYLCA
MEPQ----
>Vs241-Mus_m2-124902244-trav
-----VSRGEQVEQR-PPHLSVREGDSAFIICT-YTD---S---ATAY-FYWYKQEPGAG
L-QLLMSVFS-N----VD---RKEEQGLTVLLNK---KDKRLSLNLTAAHPGDSAVYFCA
VS------
>Vs242-Mus_m2-124902244-trav
------VKGQQVQQS-PASLVLQEGENAELQCS-FSI---S---T-NQ-VQWFYQRPGGR
L-IGLSYIPG-M-----K-----PTGKQTSSTVT---KGRHSSLTISSSQTTDSGTYFCV
LSTQCSP-
>Vs243-Mus_m2-124902244-trav
-----GNSAQSVDQP-DAHVTLSEGASLELRCS-YSY--S----AAPY-LFWYVQYPGQS
L-QFLLKYIT-G-DTV-----VKGTKGFEAEFRK---SNSSFNLKKSPAHWSDSAKYFCA
LE------
>Vs244-Mus_m2-124902244-trav
------VATQRLEQS-PRFLSIQEGQDFTARCS-S-S---T---TFPQ-LYWYRQVPREG
P-VILVTLVK-S----GE---VKEQRRMTAKFGE---ARKNSSLFIARAQPGDAGIYFCT
G-------
>Vs245-Mus_m2-124902244-trav
------IAGDAKTTQ-PDSMESTEGETVHLPCS-HAT---I--SGNEY-IYWYRQVPLQG
P-EYVTHGLQ-Q---------NTTNSMAFLAIAS---DRKSSTLILPHVSLRDAAVYHCI
LRV-----
>Vs198-Mus_m2-124902244-trav
------VKGQQVQQS-PASLVLQEGENAELQCN-FSS---T---A-TQ-LQWFYQSPGGS
L-VSLLSNPS-G-----T---K-HTGRLTSTTVT---KERRSSLHISSSQTTDSGTYLCA
IDPQCS--
>Vs176-Mus_m2-124902244-trav
-----VSRGEQVEQR-PPHLSVREGDSAVIICT-YTD---P---NSYY-FFWYKQEPGAG
L-QLLMKVFS-S----TE---INEGQGFTVLLNK---KDKQLSLNLTAAHPGDSAVYFCA
VS------
>Vs177-Mus_m2-124902244-trav
-----GVRGDQVEQS-PSALSLHEGTGSALRCN-FTT---T---M-RA-VQWFRKNSRGS
L-INLFYLAS-G-----T---K-ENGRLKSAFDS---KERYSTLHIRDAQLEDSGTYFCA
AE------
>Vs174-Mus_m2-124902244-trav
------VKGQQVQQS-PASLVLQEGENAELQCN-FSS---T---A-TQ-LQWFYQSPGGS
L-VSLLSNPS-G-----T---K-HTGRLTSTTVT---KERRSSLHISSSQTTDSGTYLCA
IDPQCS--
>Vs172-Mus_m2-124902244-trav
-----DAQAQSVTQP-DARVTVSEGASLQLRCK-YSY--F----GTPY-LFWYVQYPRQG
L-QLLLKYYP-G-DPV-----VQGVNGFEAEFSK---SNSSFHLRKASVHWSDWAVYFCA
V-------
>Vs173-Mus_m2-124902244-trav
---RSNGDGDSVTQT-EGLVTLTEGLPVMLNCT-YQTI-Y----SNPF-LFWYVQHLNES
P-RLLLKSFT-D-NK------RTEHQGFHATLHK---SSSSFHLQKSSAQLSDSALYYCA
LS------
>Vs170-Mus_m2-124902244-trav
-----GVSGDKVKQS-PSALSLQEGTNSALRCN-FSI---A---A-TT-VQWFLQNPRGS
L-MNLFYLVP-G-----T---K-ENGRLKSAFDS---KESYSTLHIRDAQLEDSGTYFCA
AE------
>Vs171-Mus_m2-124902244-trav
-----RSNGDSVTQT-EGLVTLTKGLPVMLNCT-YQTT-Y----S-PF-LFWYVQHLNEA
P-KLLLKSST-D-NK------RTEHQGFYATLHK---SSSSFHLQKSSVQLSDSALYFCA
LS------
>Vs178-Mus_m2-124902244-trav
-----MSQGEQVEQL-PSILRVQEGSSASINCT-YEN---S---ASNY-FPWYKQEPGEN
P-KLIIDIRS-N----ME---RKQTQGLIVLLDK---KAKRFSLHITDTQPGDSAMYFCA
AS------
>Vs179-Mus_m2-124902244-trav
-----RAHGDSVTQT-EGQVALSEEDFLTIHCN-YSA--S----GYPA-LFWYVQYPGEG
P-QFLFRASR-D-KE------KGSSRGFEATYDK---GTTSFHLRKASVQESDSAVYYCA
LG------
>Vs191-Mus_m2-124902244-trav
------VKGQQVQQS-PTSLVLQEGENAELQCN-FST---S---L-NS-MQWFYQRPGGS
L-ISVFYNPS-G-----T---K-QSGRLTSTTVI---KERRSSLHISSSQITDSGTYLCA
MEPQCS--
>Vs208-Mus_m2-124902244-trav
----ATSMAQKVTQT-QTSISVVEKTTVTMDCV-YET---R--DSSYF-LFWYKQTASGE
I-VFLIRQDS-Y---KKE---NATVGHYSLNFQK---PKSSIGLIITATQIEDSAVYFCA
MRE-----
>Vs209-Mus_m2-124902244-trav
-ASQLGLKEQQVQQS-PASLVLQEAENAELQCS-FSI---F---T-NQ-VQWFYQRPGGR
L-VSLLYNPS-G-----T---K-QSGRLTSTTVI---KERRSSLHISSSQITDSGTYLCA
ME------
>Vs226-Mus_m2-124902244-trav
-----DAQAQSVTQP-DARVTVSEGASLQLRCK-YSY--S----GTPY-LFWYVQYPRQG
L-QLLLKYYS-G-DPV-----VQGVNGFEAEFSK---SNSSFHLRKASVHWSDSAVYFCV
LS------
>Vs227-Mus_m2-124902244-trav
-----GVSGDKVKQS-PSALSLQEGTNSALRCN-FSI---A---A-TT-VQWFLQNPRGS
L-INLFYLVP-G-----T---K-ENGRLKSAFDS---KESYSTLHIRDAQLEDSGTYFCA
AE------
>Vs224-Mus_m2-124902244-trav
------VKGQQVQQS-PASLVLQEGENAELQCN-FST---S---L-NS-MQWFYQRPGGS
L-VSLFYNPS-G-----T---K-HSGRLTSTTVI---KERRSSLHISSSQTTDSGTYLCA
LEPQC---
>Vs222-Mus_m2-124902244-trav
-----VSSQQKVQQS-PESLTVSEGAMASLNCT-FSD---G---TSNN-FRWYRQHSAKG
L-EVLVSIFS-D----G----EKEEGRFTAHLNR---ANLHVSLHIREPQPSDSAVYLCA
V-------
>Vs223-Mus_m2-124902244-trav
-----RSNGDSVTQT-EGLVTVTEGLPVKLNCT-YQTT-Y----LTIA-FFWYVQYLNEA
P-QVLLKSST-D-NK------RTEHQGFHATLHK---SSSSFHLQKSSAQLSDSALYYCA
LS------
>Vs220-Mus_m2-124902244-trav
-----RTHGDSVTQT-EGPVTVSESESLIINCT-YSATSI----AYPN-LFWYVRYPGEG
L-QLLLKVIT-A-GQ------KGSSRGFEATYNK---ETTSFHLQKASVQESDSAVYYCA
LG------
>Vs221-Mus_m2-124902244-trav
-----VAGKTQVEQS-PQSLVVRQGENCVLQCN-YSV---T---PDNH-LRWFKQDTGKG
L-VSLTVLVD-Q----KD---KTSNGRYSATLDK---DAKHSTLHITATLLDDTATYICV
VG------
>Vs200-Mus_m2-124902244-trav
-----VSRGEQVEQR-PPHLSVREGDSAVIICT-YTD---P---NSYY-FFWYKQEPGAG
L-QLLMKVFS-S----TE---INEGQGFTVLLNK---KDKQLSLNLTAAHPGDSAVYFCA
VS------
>Vs228-Mus_m2-124902244-trav
-----RNNGDSVTQT-EGLVTLTEGLPVMLNCT-YQST-Y----S-PF-LFWYVQHLNEA
P-KLLLKSFT-D-NK------RPEHQGFHATLHK---SSSSFHLQKSSAQLSDSALYYCA
LS------
>Vs229-Mus_m2-124902244-trav
---RSNGDGDSVTQK-EGLVTLTEGLPVMLNCT-YQTI-Y----SNAF-LFWYVHYLNES
P-RLLLKSST-D-NK------RTEHQGFHATLHK---SSSSFHLQKSSAQLSDSALYYCA
LS------
>Vs201-Mus_m2-124902244-trav
-----DAQAQSVTQP-DARVTVSEGASLQLRCK-YSY--S----ATPY-LFWYVQYPRQG
L-QLLLKYYS-G-DPV-----VQGVNSFEAEFSK---SNSSFHLQKASVHWSDSAVYFCA
L-------
>Vs147-Mus_m2-124902244-trav
------AAGQGVEQ--PAKLMSVEGTFARVNCT-YST---S---GFNG-LSWYQQREGQA
P-VFLSYVVL-D----GL---K-DSGHFSTFLSR---SNGYSYLLLTELQIKDSASYLCA
VR------
>Vs149-Mus_m2-124902244-trav
-----VSRGEQVEQR-PPHLSVREGDSAIIICT-YTD---S---ATAY-FSWYKQEAGAG
L-QLLMSVLS-N----VD---RKEEQGLTVLLNK---KDKRLSLNLTAAHPGDSAVYFCA
VS------
>Vs148-Mus_m2-124902244-trav
------SWSLAKTTQ-PPSMEAYEGQEVNVSCS-HTN---I--ATSEY-IYWYRQVPHQG
P-QFIIQGYK-D---------YVVNEVASLFISA---DRKLSTLSLPWVSLRDAAVYYCI
VT------
>Vs3-Homo_sapiens-ABBA01174525.1-trbv
------LKEAEIYQT-PRHRVIGAGKKITLECS-QTM-------GHDK-MYWSRSRNGIT
P-HPPF--LW-V-NSTEK--GDL-CSESTVSR----IRIERFPLTLESASPSHTSQYLCA
SSE-----
>Vs279-Homo_sapiens-ABBA01034128.1-trbv
------STDTKVTQR-PRLLAKASEQKAKMDCV-PIK-------AHSY-VYWYRKKLEEE
L-KFLVYFQN-E-ELIQK--AEIINERFLAQC----SKNSSCTLEIQSTESGDTALYFCA
SSK-----
>Vs278-Homo_sapiens-ABBA01034128.1-trbv
----GSGLGAVVSQH-PSWVICKSGTSVKIECR-SLD---F---QATT-MFWYRQFPKQS
L-MLMATSN--E-GSKATYEQGVEKDKFLINH----ASLTLSTLTVTSAHPEDSSFYICS
AR------
>Vs271-Homo_sapiens-ABBA01034125.1-trbv
------HTDAGVIQS-PRHEVTEMGQEVTLRCK-PIS-------GHNS-LFWYRQTMMRG
L-ELLIYFNN-N-VPIDD--SGMPEDRFSAKM----PNASFSTLKIQPSEPRDSAVYFCA
SSL-----
>Vs270-Homo_sapiens-ABBA01034125.1-trbv
------LIEAGVVQS-PRYKIIEKKQPVAFWCN-PIS-------GHNT-LYWYLQNLGQG
P-ELLIRYEN-E-EAVDD--SQLPKDRFSAER----LKGVDSTLKIQPAELGDSAVYLCA
SSL-----
>Vs273-Homo_sapiens-ABBA01034126.1-trbv
------LIDARVTQT-PRHKVTEMGQEVTMRCQ-PIL-------GHNT-VFWYRQTMMQG
L-ELLAYFRN-R-APLDD--SGMPKDRFSAEM----PDATLATLKIQPSEPRDSAVYFCA
SGL-----
>Vs272-Homo_sapiens-ABBA01034125.1-trbv
------HTDAGVIQS-PRHEVTEMGQEVTLRCK-PIS-------GHDY-LFWYRQTMMRG
L-ELLIYFNN-N-VPIDD--SGMPEDRFSAKM----PNASFSTLKIQPSEPRDSAVYFCA
SSL-----
>Vs275-Homo_sapiens-ABBA01034126.1-trbv
------HGDAMVIQN-PRYQVTQFGKPVTLSCS-QTL-------NHNV-MYWYQQKSSQA
P-KLLFHYYD-K-DFNNE--ADT-PDNFQSRR----PNTSFCFLDIRSPGLGDAAMYLCA
TSR-----
>Vs274-Homo_sapiens-ABBA01034126.1-trbv
------HIEAGVTQF-PSHSVIEKGQTVTLRCD-PIS-------GHDN-LYWYRRVMGKE
I-KFLLHFVK-E-SKQDE--SGMPNNRFLAER----TGGTYSTLKVQPAELEDSGVYFCA
SSQ-----
>Vs277-Homo_sapiens-ABBA01034128.1-trbv
------TVDGGITQS-PKYLFRKEGQNVTLSCE-QNL-------NHDA-MYWYRQDPGQG
L-RLIYYSQI-V-NDFQK--GDI-AEGYSVSR----EKKESFPLTVTSAQKNPTAFYLCA
SSI-----
>Vs276-Homo_sapiens-ABBA01034126.1-trbv
------SPGEEVAQT-PKHLVRGEGQKAKLYCA-PIK-------GHSY-VFWYQQVLKNE
F-KFLISFQN-E-NVFDE--TGMPKERFSAKC----LPNSPCSLEIQATKLEDSAVYFCA
SSQ-----
>Vs882-Homo_sapiens-ABBA01034127.1-trbv
------LSNAGVMQN-PRHLVRRRGQEARLRCS-PMK-------GHSH-VYWYRQLPEEG
L-KFMVYLQK-E-NIIDE--SGMPKERFSAEF----PKEGPSILRIQQVVRGDSAAYFCA
S-------
>Vs284-Homo_sapiens-ABBA01034128.1-trbv
------LVDVKVTQS-SRYLVKRTGEKVFLECV-QDM-------DHEN-MFWYRQDPGLG
L-RLIYFSYD-V-KMKEK--GDI-PEGYSVSR----EKKERFSLILESASTNQTSMYLCA
SSL-----
>Vs285-Homo_sapiens-ABBA01034128.1-trbv
-----SVFSAVISQK-PSRDICQRGTSLTIQCQ--VD---S---QVTM-MFWYRQQPGQS
L-TLIATAN--Q-GSEATYESGFVIDKFPISR----PNLTFSTLTVSNMSPEDSSIYLCS
VE------
>Vs286-Homo_sapiens-ABBA01034129.1-trbv
------VRSQTIHQW-PATLVQPVGSPLSLECT-VEG---T---SNPN-LYWYRQAAGRG
L-QLLFYSVG-I----GQ---ISS--EVPQNLSASRPQDRQFILSSKKLLLSDSGFYLCA
WS------
>Vs280-Homo_sapiens-ABBA01034128.1-trbv
------SFHAKVTQT-PGHLVKGKGQKTKMDCT-PEK-------GHTF-VYWYQQNQNKE
F-MLLISFQN-E-QVLQE--TEMHKKRFSSQC----PKNAPCSLAILSSEPGDTALYLCA
SSQ-----
>Vs281-Homo_sapiens-ABBA01034128.1-trbv
------SMDADVTQT-PRNRITKTGKRIMLECS-QTK-------GHDR-MYWYRQDPGLG
L-QLIYYSFD-V-KDINK--GEI-SDGYSVSR----QAQAKFSLSLESAIPNQTALYFCA
TSD-----
>Vs282-Homo_sapiens-ABBA01034128.1-trbv
------LMEADIYQT-PRYLVIGTGKKITLECS-QTM-------GHDK-MYWYQQDPGME
L-HLIHYSYG-V-NSTEK--GDL-SSESTVSR----IRTEHFPLTLESARPSHTSQYLCA
SSE-----
>Vs283-Homo_sapiens-ABBA01034128.1-trbv
------PLEAQVTQN-PRYLITVTGKKLTVTCS-QNM-------NHEY-MSWYRQDPGLG
L-RQIYYSMN-V-EVTDK--GDV-PEGYKVSR----KEKRNFPLILESPSPNQTSLYFCA
SSL-----
>Vs1101-Homo_sapiens-ABBA01065042.1-trbv
-----SVFSAVISQK-PSRDICQRGTSMMIQCQ--VD---S---QVTM-MFWYCQQPGQS
V-TLIATAN--Q-GSEATYESRFVIDKFPISR----PNLTFSTLTVSNRRPEDSSIYLCS
VE------
>Vs1100-Homo_sapiens-ABBA01065042.1-trbv
------LKEAGIYQT-PRHRVIGAGKKITLECS-QTM-------GHDK-MYWSRSRNGIT
P-HPPF--LW-V-NSTEK--GDL-CSESTVSR----IRIERFPLTLESASPSHTSQYLCA
SSE-----
>Vs1103-Homo_sapiens-ABBA01065043.1-trbv
------SMDTKVTQR-PRFLVKANEQKAKMDCV-PIK-------RHSY-VYWYHKTLEEE
L-KFFIYFQN-E-EIIQK--AEIINERFSAQC----PQNSPCTLEIQSTESGDTARYFCA
NSK-----
>Vs1102-Homo_sapiens-ABBA01065043.1-trbv
----GSGLSAVVSQH-PSRVICKSGTSVNIECR-SLD---F---QATT-MFWYRQLRKQS
L-MLMATSN--E-GSEVTYEQGVKKDKFPINH----PNLTFSALTVTSAHPEDSSFYICS
AR------
>Vs1104-Homo_sapiens-ABBA01065043.1-trbv
------CFHAKVTQT-PGYLVKGKGRKTKMYCT-PKN-------GHTF-VCWYQQNQNKE
F-MFLISFQN-E-QVLQE--MEMHKKRFSSQC----PKNPPCSLAILSSEPGDTALYLCA
TSP-----
>Vs268-Homo_sapiens-ABBA01034125.1-trbv
------SVAAGVIQS-PRHLIKEKRETATLKCY-PIP-------RHDT-VYWYQQGPGQD
P-QFLISFYE-K-MQSDK--GSI-PDRFSAQQ----FSDYHSELNMSSLELGDSALYFCA
SSL-----
>Vs269-Homo_sapiens-ABBA01034125.1-trbv
------HMDAGITQS-PRHKVTETGTPVTLRCH-QTE-------NHRY-MYWYRQDPGHG
L-RLIHYSYG-V-KDTDK--GEV-SDGYSVSR----SKTEDFLLTLESATSSQTSVYFCA
ISE-----
>Vs262-Homo_sapiens-ABBA01034125.1-trbv
------LVDAGVTQS-PTHLIKTRGQQVTLRCS-PKS-------GHDT-VSWYQQALGQG
P-QFIFQYYE-E-EERQR--GNF-PDRFSGHQ----FPNYSSELNVNALLLGDSALYLCA
SSL-----
>Vs263-Homo_sapiens-ABBA01034125.1-trbv
------PVNAGVTQT-PKFHILKTGQSMTLQCA-QDM-------NHGY-MSWYRQDPGMG
L-RLIYYSAA-A-GTTDK---EV-PNGYNVSR----LNTEDFPLRLVSAAPSQTSVYLCA
SSY-----
>Vs260-Homo_sapiens-ABBA01034125.1-trbv
------PVNAGVTQT-PKFRILKIGQSMTLQCT-QDM-------NHNY-MYWYRQDPGMG
L-KLIYYSVG-A-GITDK--GEV-PNGYNVSR----STTEDFPLRLELAAPSQTSVYFCA
SSY-----
>Vs261-Homo_sapiens-ABBA01034125.1-trbv
------PVDAGVTQS-PTHLIKTRGQHVTLRCS-PIS-------GHKS-VSWYQQVLGQG
P-QFIFQYYE-K-EERGR--GNF-PDRFSARQ----FPNYSSELNVNALLLGDSALYLCA
SSL-----
>Vs266-Homo_sapiens-ABBA01034125.1-trbv
------PVEAGVTQS-PTHLIKTRGQQATLRCS-PIS-------GHTS-VYWYQQALGLG
L-QFLLWYDE-G-EERNR--GNF-PPRFSGRQ----FPNYSSELNVNALELEDSALYLCA
SSL-----
>Vs267-Homo_sapiens-ABBA01034125.1-trbv
------HADTGVSQD-PRHKITKRGQNVTFRCD-PIS-------EHNR-LYWYRQTLGQG
P-EFLTYFQN-E-AQLEK--SRLLSDRFSAER----PKGSFSTLEIQRTEQGDSAMYLCA
SSL-----
>Vs264-Homo_sapiens-ABBA01034125.1-trbv
------PVNAGVTQT-PKFHILKTGQSMTLQCA-QDM-------NHGY-LSWYRQDPGMG
L-RRIHYSVA-A-GITDK--GEV-PDGYNVSR----SNTEDFPLRLESAAPSQTSVYFCA
SSY-----
>Vs265-Homo_sapiens-ABBA01034125.1-trbv
------HTGAGVSQS-PRYKVAKRGQDVALRCD-PIS-------GHVS-LFWYQQALGQG
P-EFLTYFQN-E-AQLDK--SGLPSDRFFAER----PEGSVSTLKIQRTQQEDSAVYLCA
SSL-----
>Vs1205-Homo_sapiens-ABBA01122758.1-trbv
------LKEAGIYQT-PRHRVIGAGKKITLECS-QTM-------GHDK-MYWSRSRNGIT
P-HPPF--LW-V-NSTEK--GDL-CSESTVSR----IRIERFPLTLESASPSHTSQYLCA
SSE-----
>Vs1210-Homo_sapiens-ABBA01137902.1-trbv
------PVNAGVTQT-PKFRVLKTGQSMTLLCA-QDM-------NHEY-MYWYRQDPGMG
L-RLIHYSVG-E-GTTAK--GEV-PDGYNVSR----LKKQNFLLGLESAAPSQTSVYFCA
SSY-----
>Vs257-Homo_sapiens-ABBA01034125.1-trbv
------PVNAGVTQT-PKFQVLKTGQSMTLQCA-QDM-------NHEY-MSWYRQDPGMG
L-RLIHYSVG-A-GITDQ--GEV-PNGYNVSR----STTEDFPLRLLSAAPSQTSVYFCA
SSY-----
>Vs256-Homo_sapiens-ABBA01034125.1-trbv
------LTEAGVAQS-PRYKIIEKRQSVAFWCN-PIS-------GHAT-LYWYQQILGQG
P-KLLIQFQN-N-GVVDD--SQLPKDRFSAER----LKGVDSTLKIQPAKLEDSAVYLCA
SSL-----
>Vs255-Homo_sapiens-ABBA01034125.1-trbv
------HRDAGITQS-PRYKITETGRQVTLMCH-QTW-------SHSY-MFWYRQDLGHG
L-RLIYYSAA-A-DITDK--GEV-PDGYVVSR----SKTENFPLTLESATRSQTSVYFCA
SSE-----
>Vs254-Homo_sapiens-ABBA01034125.1-trbv
------LSEAEVAQS-PRYKITEKSQAVAFWCD-PIS-------GHAT-LYWYRQILGQG
P-ELLVQFQD-E-SVVDD--SQLPKDRFSAER----LKGVDSTLKIQPAELGDSAMYLCA
SSL-----
>Vs253-Homo_sapiens-ABBA01034125.1-trbv
------PVDSGVTQT-PKHLITATGQRVTLRCS-PRS-------GDLS-VYWYQQSLDQG
L-QFLIQYYN-G-EERAK--GNI-LERFSAQQ----FPDLHSELNLSSLELGDSALYFCA
SSV-----
>Vs252-Homo_sapiens-ABBA01034125.1-trbv
------PVEAGVTQS-PTHLIKTRGQQVTLRCS-PIS-------GHSS-VSWYQQAPGQG
P-QFIFEYAN-E-LRRSE--GNF-PNRFSGRQ----FHDCCSEMNVSALELGDSALYLCA
RSL-----
>Vs251-Homo_sapiens-ABBA01034125.1-trbv
------HTGAGVSQT-PSNKVTEKGKYVELRCD-PIS-------GHTA-LYWYRQSLGQG
P-EFLIYFQG-T-GAADD--SGLPNDRFFAVR----PEGSVSTLKIQRTERGDSAVYLCA
SSL-----
>Vs250-Homo_sapiens-ABBA01034125.1-trbv
------PVIAGITQA-PTSQILAAGRRMTLRCT-QDM-------RHNA-MYWYRQDLGLG
L-RLIHYSNT-A-GTTGK--GEV-PDGYSVSR----ANTDDFPLTLASAVPSQTSVYFCA
SSD-----
>Vs259-Homo_sapiens-ABBA01034125.1-trbv
------SVETGVTQS-PTHLIKTRGQQVTLRCS-SQS-------GHNT-VSWYQQALGQG
P-QFIFQYYR-E-EENGR--GNF-PPRFSGLQ----FPNYSSELNVNALELDDSALYLCA
SSL-----
>Vs258-Homo_sapiens-ABBA01034125.1-trbv
------HTGAGVSQS-PRYKVAKRGRDVALRCD-SIS-------GHVT-LYWYRQTLGQG
S-EVLTYSQS-D-AQRDK--SGRPSGRFSAER----PERSVSTLKIQRTEQGDSAVYLCA
SSL-----
>Vs242-Homo_sapiens-ABBA01034123.1-trbv
------LTEPEVTQT-PSHQVTQMGQEVILRCV-PIS-------NHLY-FYWYRQILGQK
V-EFLVSFYN-N-EISEK--SEIFDDQFSVER----PDGSNFTLKIRSTKLEDSAMYFCA
SSE-----
>Vs243-Homo_sapiens-ABBA01034123.1-trbv
------PLDTAVSQT-PKYLVTQMGNDKSIKCE-QNL-------GHDT-MYWYKQDSKKF
L-KIMFSYNN-K-ELIIN--ETV-PNRFSPKS----PDKAHLNLHINSLELGDSAVYFCA
SSQ-----
>Vs244-Homo_sapiens-ABBA01034123.1-trbv
------PIDTEVTQT-PKHLVMGMTNKKSLKCE-QHM-------GHRA-MYWYKQKAKKP
P-ELMFVYSY-E-KLSIN--ESV-PSRFSPEC----PNSSLLNLHLHALQPEDSALYLCA
SSQ-----
>Vs245-Homo_sapiens-ABBA01034123.1-trbv
------PVKAGVTQT-PRYLIKTRGQQVTLSCS-PIS-------GHRS-VSWYQQTPGQG
L-QFLFEYFS-E-TQRNK--GNF-PGRFSGRQ----FSNSRSEMNVSTLELGDSALYLCA
SSL-----
>Vs246-Homo_sapiens-ABBA01034123.1-trbv
------PVNAGVTQT-PKFQVLKTGQSMTLQCA-QDM-------NHNS-MYWYRQDPGMG
L-RLIYYSAS-E-GTTDK--GEV-PNGYNVSR----LNKREFSLRLESAAPSQTSVYFCA
SSE-----
>Vs247-Homo_sapiens-ABBA01034123.1-trbv
------PMETGVTQT-PRHLVMGMTNKKSLKCE-QHL-------GHNA-MYWYKQSAKKP
L-ELMFVYNF-K-EQTEN--NSV-PSRFSPEC----PNSSHLFLHLHTLQPEDSALYLCA
SSQ-----
>Vs248-Homo_sapiens-ABBA01034124.1-trbv
------PMETGVTQT-PRHLVMGMTNKKSLKCE-QHL-------GHNA-MYWYKQSAKKP
L-ELMFVYSL-E-ERVEN--NSV-PSRFSPEC----PNSSHLFLHLHTLQPEDSALYLCA
SSQ-----
>Vs249-Homo_sapiens-ABBA01034125.1-trbv
------HTGAGVSQS-PSNKVTEKGKDVELRCD-PIS-------GHTA-LYWYRQSLGQG
L-EFLIYFQG-N-SAPDK--SGLPSDRFSAER----TGGSVSTLTIQRTQQEDSAVYLCA
SSL-----
>Vs455-Mus_m2-149736546-trbv
------PVDPKIIQK-PKYLVAVTGSEKILICE-QYL-------GHNA-MYWYRQSAKKP
L-EFMFSYSY-Q-KLMDN--QTA-SSRFQPQS----SKKNHLDLQITALKPDDSATYFCA
SSQ-----
>Vs457-Mus_m2-149736546-trbv
------PLETAVFQT-PNYHVTQVGNEVSFNCK-QTL-------GHDT-MYWYKQDSKKL
L-KIMFSYNN-K-QLIVN--ETV-PRRFSPQS----SDKAHLNLRIKSVEPEDSAVYLCA
SS------
>Vs456-Mus_m2-149736546-trbv
------HTGPKVLQI-PSHQIIDMGQMVTLNCD-PVS-------NHLY-FYWYKQILGQQ
M-EFLVNFYN-G-KVMEK--SKLFKDQFSVER----PDGSYFTLKIQPTALEDSAVYFCA
SSL-----
>Vs459-Mus_m2-149736546-trbv
------SADSGVVQS-PRHIIKEKGGRSVLTCI-PIS-------GHSN-VVWYQQTLGKE
L-KFLIQHYE-K-VERDK--GFL-PSRFSVQQ----FDDYHSEMNMSALELEDSAMYFCA
SS------
>Vs458-Mus_m2-149736546-trbv
------LMNTKITQS-PRYLILGRAN-KSLECE-QHL-------GHNA-MYWYKQSAEKP
P-ELMFLYNL-K-QLIRN--ETV-PSRFIPEC----PDSSKLLLHISAVDPEDSAVYFCA
SSQ-----
>Vs473-Mus_m2-149736546-trbv
-----SVFSVLLYQK-PNRDICQSGTSLKIQCV-ADS-------QVVS-MFWYQQFQEQS
L-MLMATANEGS-EATYE--SGFTKDKFPISR----PNLTFSTLTVNNARPGDSSIYFCS
SR------
>Vs472-Mus_m2-149736546-trbv
------LVDMKVTQM-PRYLIKRMGENVLLECG-QDM-------SHET-MYWYRQDPGLG
L-QLIYISYD-V-DSNSE--GDI-PKGYRVSR----KKREHFSLILDSAKTNQTSVYFCA
SSL-----
>Vs471-Mus_m2-149736546-trbv
------ILNSKVIQT-PRYLVKGQGQKAKMRCI-PEK-------GHPV-VFWYQQNKNNE
F-KFLINFQN-Q-EVLQQ--IDMTEKRFSAEC----PSNSPCSLEIQSSEAGDSALYLCA
SSL-----
>Vs470-Mus_m2-149736546-trbv
------SFDAAVTQK-PRYLIKMKGQEAEMKCI-PEK-------GHTA-VFWYQQKQSKE
L-KFLIYFQN-Q-QPLDQ--IDMVKERFSAVC----PSSSLCSLGIRTCEAEDSALYLCS
SSQ-----
>Vs469-Mus_m2-149736546-trbv
------SMDSGVVQN-PRHLVKGKEQKAKMDCT-PIN-------GHSY-VYWYYKKPGEE
L-KFLVYFQN-E-DIIDK--IDMIGKNISAKC----PAKKPCTIEIQSSKLTDSAVYFCA
SSQ-----
>Vs464-Mus_m2-149736546-trbv
------LSEAGVTQS-PRYAVLQEGQAVSFWCD-PIS-------GHDT-LYWYQQPRDQG
P-QLLVYFRD-E-AVIDN--SQLPSDRFSAVR----PKGTNSTLKIQSAKQGDTATYLCA
SSF-----
>Vs465-Mus_m2-149736546-trbv
------HTDAGVTQT-PRHEVAEKGQTIILKCE-PVS-------GHND-LFWYRQTKIQG
L-ELLSYFRS-K-SLMED--GGAFKDRFKAEM----LNSSFSTLKIQPTEPKDSAVYLCA
SSL-----
>Vs466-Mus_m2-149736546-trbv
------PTNAGVIQT-PRHKVTGKGQEATLWCE-PIS-------GHSA-VFWYRQTIVQG
L-EFLTYFRN-Q-APIDD--SGMPKERFSAQM----PNQSHSTLKIQSTQPQDSAVYLCA
SSL-----
>Vs467-Mus_m2-149736546-trbv
------FVDTTVKQN-PRYKLARVGKPVNLICS-QTM-------NHDT-MYWYQKKPNQA
P-KLLLFYYD-K-ILNRE--ADT-FEKFQSSR----PNNSFCSLYIGSAGLEYSAMYLCA
SSR-----
>Vs460-Mus_m2-149736546-trbv
------HMEAAVTQS-PRNKVTVTGGNVTLSCR-QTN-------SHNY-MYWYRQDTGHG
L-RLIHYSYG-A-GNLQI--GDV-PDGYKATR----TTQEDFFLLLELASPSQTSLYFCA
SSD-----
>Vs461-Mus_m2-149736546-trbv
------SANSGVVQS-PRYIIKGKGERSILKCI-PIS-------GHLS-VAWYQQTQGQE
L-KFFIQHYD-K-MERDK--GNL-PSRFSVQQ----FDDYHSEMNMSALELEDSAVYFCA
SS------
>Vs462-Mus_m2-149736546-trbv
------HMEAAVTQS-PRNKVAVTGGKVTLSCN-QTN-------NHNN-MYWYRQDTGHG
L-RLIHYSYG-A-GSTEK--GDI-PDGYKASR----PSQENFSLILELATPSQTSVYFCA
SGD-----
>Vs463-Mus_m2-149736546-trbv
------HMEAAVTQS-PRSKVAVTGGKVTLSCH-QTN-------NHDY-MYWYRQDTGHG
L-RLIHYSYV-A-DSTEK--GDI-PDGYKASR----PSQENFSLILELASLSQTAVYFCA
SSD-----
>Vs566-Homo_sapiens-ABBA01061277.1-trdv
-----VMSAIELVPE-HQTVPVSIGIPATLRCS-MKGEAI----GNYY-INWYRKTQGNT
I-TFIYR------EKDIYG--PGFKDNFQGDIDI---AKNLAVLKILAPSERDEGSYYCA
C-------
>Vs551-Homo_sapiens-ABBA01061270.1-trdv
-----SSVAQKVTQA-QSSVSMPVRKAVTLNCL-YET---S--WWSYY-IFWYKQLPSKE
M-IFLIRQGS-----DEQ---NAKSGRYSVNFKK---AAKSVALTISALQLEDSAKYFCA
LGE-----
>Vs1072-Homo_sapiens-ABBA01061278.1-trdv
----RGTLCDKVTQS-SPDQTVASGSEVVLLCT-YDT---V--YSNPD-LFWYRIRPDYS
F-QFVFYGDN-S-RSEGA---DFTQGRFSVKHIL---TQKAFHLVISPVRTEDSATYYCA
F-------
>Vs865-Mus_m2-124902244-trdv
----KDVLCITLTQS-STDQTVASGTEVTLLCT-YNA---D--SPNPD-LFWYRKRPDRS
F-QFILYRDD-T-SSHDA---DFVQGRFSVKHSK---ANRTFHLVISPVSLEDSATYYCA
SG------
>Vs168-Mus_m2-124902244-trdv
-----SNVAEKVIQV-WSTASRQEGEELTLDCS-YET---S--QVLYH-LFWYKHLLSGE
M-VFLIRQTS-S---STA---KERSGRYSVVFQK---SLKSISLIISALQPDDSGKYFCA
LWEL----
>Vs231-Mus_m2-124902244-trdv
-----CNVAQRVTQV-QSTGSSQWGE-VTLDCS-YET---S--EYSYL-ILWYRQLFSGE
M-VFLIYQPS-F---DTQ---NQRSGHYSVVFQK---SFKSISLVISASQPEDSGTYFCA
LSEL----
>Vs246-Mus_m2-124902244-trdv
------VNTQMLHQS-PQSLTIQEGDEVTMSCN-L-S---T---SLYA-LLWYRQGDDGS
L-VSLVTLQK-G----GD---EKSKDKITANLDK---KMQQSSLWIQASQPSHSGTYLCG
GK------
>Vs247-Mus_m2-124902244-trdv
-----ASMAQTVSQP-QKKKSVQVAESATLDCT-YDT---S--DTNYL-LFWYKQQGG-Q
V-TLVILQEA-Y---KQY---NATLNRFSVNFQK---AAKSFSLEISDSQLGDAATYFCA
LRG-----
>Vs248-Mus_m2-124902244-trdv
-----ASMAQTVSQP-QKKKSVQVAESATLDCT-YDT---S--DTNYL-LFWYKQQGG-Q
V-TLVILQEA-Y---KQY---NATLNRFSVNFQK---AAKSFSLEISDSQLGDAATYFCA
LME-----
>Vs199-Mus_m2-124902244-trdv
-----CNVAQRVTQV-QPTGSSQWGEEVTLDCS-YET---S--EYFYR-IFWYRQLFSGE
M-VFLIYQPS-F---DTQ---NQRSGRYSVVFQK---SFKSISLVISASQPEDSGTYFCA
LSEL----
>Vs192-Mus_m2-124902244-trdv
-----SNVAEKVIQV-WSTASRQEGEELTLDCS-YET---S--QVLYH-LFWYKHLLSGE
M-VFLIRQTS-S---STA---KERSGRYSVVFQK---SLKSISLIISALQPDDSGKYFCA
LWEL----
>Vs175-Mus_m2-124902244-trdv
-----CNVAQRVTQV-QPTGSSQWGEEVTLDCS-YET---S--EYFYR-IFWYRQLFSGE
M-VFLIYQPS-F---DTQ---NQRSGRYSVVFQK---SFKSISLVISASQPEDSGTYFCA
LSEL----
>Vs225-Mus_m2-124902244-trdv
-----SNVAQKVIQV-WSTTSRQEGEKLTLDCS-YKT---S--QVLYH-LFWYKHLLSGE
M-VLLIRQMP-S---TIA---IERSGRYSVVFQK---SRKSISLVISTLQPDDSGKYFCA
LWEL----
>Vs1041-Homo_sapiens-ABBA01056929.1-trgv
-----SQKSSNLEGG-TKSVTRPTRSSAEITCD-LTV---I---NAFY-IHWYLHQEGKA
P-QRLLYYDV-S-NSKDVLESGLSPGKYYTHT----PRRWSWILILRNLIENDSGVYYCA
TWD-----
>Vs1042-Homo_sapiens-ABBA01056929.1-trgv
-----SQKSSNLEGR-MKSVTRPTGSSAEITCD-LTV---I---NAVY-IHWYLQQEGKT
P-QHLLHYDV-S-NSRDVLESGLSLGKYYTHT----PRRWSWNLRLQNLIENDSGVYYCA
TWG-----
>Vs1035-Homo_sapiens-ABBA01056928.1-trgv
-----SQKSSNLEGR-TKSVTRPTGSSAVITCD-LPV---E---NAVY-THWYLHQEGKA
P-QRLLYYDS-Y-NSRVVLESGISREKYHTYA----STGKSLKFILENLIERDSGVYYCA
TWD-----
>Vs1039-Homo_sapiens-ABBA01056929.1-trgv
-----SQKSSNLEGR-TKSVTRQTGSSAEITCD-LTV---T---NTFY-IHWYLHQEGKA
P-QRLLYYDV-S-TARDVLESGLSPGKYYTHT----PRRWSWILRLQNLIENDSGVYYCA
TWD-----
>Vs1037-Homo_sapiens-ABBA01056929.1-trgv
-----SQISSNLEGR-TKSVTRLTGSSAEITCD-LPG---A---STLY-IHWYLHQEGKA
P-QCLLYYEP-Y-YSRVVLESGITPGKYDT-G----STRSNWNLRLQNLIKNDSGFYYCA
TWD-----
>Vs1036-Homo_sapiens-ABBA01056928.1-trgv
----------HLEQP-QISSTKTLSKTARLECV-VSG-ITI---SATS-VYWYRERPGEV
I-QFLVSIS--Y-DGTVRKESGIPSGKFEVDRI---PETSTSTLTIHNVEKQDIATYYCA
LWE-----
>Vs1038-Homo_sapiens-ABBA01056929.1-trgv
-----SQKSSNLEGR-TKSVIRQTGSSAEITCD-LAE---G---SNGY-IHWYLHQEGKA
P-QRLQYYDS-Y-NSKVVLESGVSPGKYYTYA----STRNNLRLILRNLIENDFGVYYCA
TWD-----
>Vs1040-Homo_sapiens-ABBA01056929.1-trgv
-----SQKSSNLEGR-TKSVIRQTGSSAEITCD-LAE---G---STGY-IHWYLHQEGKA
P-QRLLYYDS-Y-TSSVVLESGISPGKYDTYG----STRKNLRMILRNLIENDSGVYYCA
TWD-----
>Vs853-Mus_m2-120421639-trgv
-------GLGQLEQT-ELSVTRETDENVQISCI-VYL-PYF---SNTA-IHWYRQKTNQQ
F-EYLIYVA--T-NYNQR-PLGGKHKKIEASKD---FKSSTSTLEINYLKKEDEATYYCA
VWM-----
>Vs112-Mus_m2-120421639-trgv
-----RQTSSNLEER-IMSITKLEGSSAIMTCD-THR-------TGTY-IHWYRFQKGRA
P-EHLLYYNF-V-SSTTVVDSRFNLEKYHVYE----GPDKRYKFVLRNVEESDSALYYCA
SWA-----
>Vs113-Mus_m2-120421639-trgv
-------GHGKLEQP-EISISRPRDETAQISCK-VFI-ESF---RSVT-IHWYRQKPNQG
L-EFLLYVL--A-TPTHI-FLDKEYKKMEASKN---PSASTSILTIYSLEEEDEAIYYCS
YG------
>Vs114-Mus_m2-120421639-trgv
-----SEGSSLTSPL-GSYVIKRKGNTAFLKCQ-IKTSVQK---PDAY-IHWYQEKPGQR
L-QRMLCSS--S-KENIVYEKDFSDERYEARTW---QSDLSSVLTIHQVTEEDTGTYYCA
CWD-----
>Vs115-Mus_m2-120421639-trgv
-------GDSWISQD-QLSFTRRPNKTVHISCK-LSG-VPL---HNTI-VHWYQLKEGEP
L-RRIFYGS--V-KTYKQ---DKSHSRLEIDE----KDDGTFYLIINNVVTSDEATYYCA
CWD-----
>Vs116-Mus_m2-120421639-trgv
-------GLGQLEQT-ELSVTRATDESAQISCI-VSL-PCF---SNTA-IHWYRQKPNQQ
F-EYLIYVE--T-NYNQQ-PLGGKNKKIEASKD---FQTSTSTLKINYLKKEDEATYYCA
VWI-----
>Vs117-Mus_m2-120421639-trgv
-------GLGQLEQT-ELSVTRETDESAQISCI-VSL-PYF---SNTA-IHWYRQKA-KK
F-EYLIYVS--T-NYNQR-PLGGKNKKIEASKD---FQTSTSTLKINYLKKEDEATYYCA
VWI-----
