# Supplementary material for: Iterative Variable Gene Discovery from Whole Genome Sequencing with a Bootstrapped Multiresolution Algorithm
Source: Comput Math Methods Med. 2019 Feb 11;2019:3780245. doi: 10.1155/2019/3780245 (PMC6388353; doi:10.1155/2019/3780245)
Supplement: Supplementary Materials — supp_materialsV2.pdf: this is an updated document, which includes new figures requested by the reviewer. sequences_alignments.zip: these are genome sequence files that are relevant for reproducing some of the results. [file 3780245.f1.zip › 3780245.f1/sequences_alignments/all_init.nwk]

((((Vs634-Homo_sapiens-ABBA01139012.1-igkv:0.01041,((Vs1176-Homo_sapiens-ABBA01074234.1-igkv:0.07184,(Vs772-Homo_sapiens-ABBA01018824.1-igkv:0.02136,Vs664-Homo_sapiens-ABBA01000473.1-igkv:0.04392)0.880:0.03688)0.858:0.02989,(((((Vs1200-Homo_sapiens-ABBA01092933.1-igkv:0.0,Vs638-Homo_sapiens-ABBA01153735.1-igkv:0.0):0.02989,(Vs415-Homo_sapiens-ABBA01049978.1-igkv:0.0,Vs637-Homo_sapiens-ABBA01151660.1-igkv:0.0):0.00975)0.000:0.00055,Vs1215-Homo_sapiens-ABBA01162428.1-igkv:0.00055)0.000:0.00055,((Vs0-Homo_sapiens-ABBA01165617.1-igkv:0.01981,Vs1203-Homo_sapiens-ABBA01101181.1-igkv:0.08245)0.862:0.00055,(Vs1214-Homo_sapiens-ABBA01160297.1-igkv:0.00055,(Vs644-Homo_sapiens-ABBA01167939.1-igkv:0.0,Vs643-Homo_sapiens-ABBA01166199.1-igkv:0.0):0.00989)0.838:0.00983)0.840:0.00981)0.000:0.00054,(Vs652-Homo_sapiens-ABBA01202574.1-igkv:0.0,Vs640-Homo_sapiens-ABBA01158796.1-igkv:0.0):0.00980)0.965:0.05441)0.786:0.01952)0.904:0.03277,(Vs737-Homo_sapiens-ABBA01015162.1-igkv:0.07835,(Vs770-Homo_sapiens-ABBA01018824.1-igkv:0.01018,Vs738-Homo_sapiens-ABBA01015162.1-igkv:0.07698)0.943:0.04452)0.469:0.02136)0.759:0.01140,((Vs736-Homo_sapiens-ABBA01015162.1-igkv:0.33960,Vs769-Homo_sapiens-ABBA01018824.1-igkv:0.03272)0.752:0.01317,Vs635-Homo_sapiens-ABBA01145231.1-igkv:0.06826)0.748:0.00755)0.197:0.00054,(((((((Vs1211-Homo_sapiens-ABBA01139312.1-igkv:0.03123,(Vs1088-Mus_m2-149736546-igkv:0.41620,((Vs771-Homo_sapiens-ABBA01018824.1-igkv:0.04417,Vs735-Homo_sapiens-ABBA01015161.1-igkv:0.00054)0.965:0.04604,((Vs741-Homo_sapiens-ABBA01015164.1-igkv:0.02106,Vs768-Homo_sapiens-ABBA01018824.1-igkv:0.00054)0.785:0.02646,(Vs661-Homo_sapiens-ABBA01000473.1-igkv:0.02689,Vs72-Homo_sapiens-ABBA01012128.1-igkv:0.01748)0.899:0.05058)0.869:0.04185)0.000:0.00053)0.330:0.01331)0.994:0.18986,((Vs1126-Mus_m2-149736546-igkv:0.12117,(((Vs502-Mus_m2-149736546-igkv:0.15019,(Vs491-Mus_m2-149736546-igkv:0.12393,Vs489-Mus_m2-149736546-igkv:0.02127)0.716:0.01797)0.421:0.01771,(Vs486-Mus_m2-149736546-igkv:0.06564,Vs494-Mus_m2-149736546-igkv:0.03831)0.765:0.01410)0.744:0.01218,(((Vs1087-Mus_m2-149736546-igkv:0.13410,((Vs479-Mus_m2-149736546-igkv:0.03290,Vs480-Mus_m2-149736546-igkv:0.00054)0.739:0.01973,(Vs1136-Mus_m2-149736546-igkv:0.02840,Vs481-Mus_m2-149736546-igkv:0.03782)0.941:0.06718)0.984:0.11411)0.919:0.07131,(Vs9-Homo_sapiens-ABBA01200654.1-igkv:0.10138,Vs1206-Homo_sapiens-ABBA01128994.1-igkv:0.03468)0.592:0.03877)0.022:0.02724,(Vs662-Homo_sapiens-ABBA01000473.1-igkv:0.34434,((Vs633-Homo_sapiens-ABBA01139012.1-igkv:0.09739,(Vs5-Homo_sapiens-ABBA01181004.1-igkv:0.06410,((Vs648-Homo_sapiens-ABBA01178082.1-igkv:0.0,Vs663-Homo_sapiens-ABBA01000473.1-igkv:0.0):0.03032,Vs627-Homo_sapiens-ABBA01086407.1-igkv:0.01249)0.980:0.06753)0.761:0.02006)0.575:0.01608,(Vs492-Mus_m2-149736546-igkv:0.19447,((Vs495-Mus_m2-149736546-igkv:0.03367,Vs490-Mus_m2-149736546-igkv:0.04973)0.976:0.09959,(Vs478-Mus_m2-149736546-igkv:0.02468,Vs1140-Mus_m2-149736546-igkv:0.06034)0.832:0.03222)0.409:0.05125)0.951:0.09708)0.896:0.05422)0.492:0.01939)0.962:0.08536)0.890:0.07372)1.000:0.30245,(((Vs1084-Mus_m2-149736546-igkv:0.16176,(((Vs1077-Mus_m2-149736546-igkv:0.01061,(Vs1070-Mus_m2-149736546-igkv:0.01258,(Vs1071-Mus_m2-149736546-igkv:0.07129,Vs1072-Mus_m2-149736546-igkv:0.06867)0.221:0.01075)0.943:0.04987)0.945:0.07946,Vs509-Mus_m2-149736546-igkv:0.01807)0.821:0.03346,Vs510-Mus_m2-149736546-igkv:0.03021)0.880:0.08158)0.740:0.05953,(Vs1082-Mus_m2-149736546-igkv:0.04237,Vs1075-Mus_m2-149736546-igkv:0.00055)0.994:0.14652)0.944:0.08169,(Vs1085-Mus_m2-149736546-igkv:0.28888,(Vs124-Homo_sapiens-ABBA01018823.1-igkv:0.12393,((((((Vs1086-Mus_m2-149736546-igkv:0.06941,(Vs1078-Mus_m2-149736546-igkv:0.00055,Vs1073-Mus_m2-149736546-igkv:0.00055)1.000:0.34240)0.861:0.04854,(Vs1081-Mus_m2-149736546-igkv:0.02871,Vs1074-Mus_m2-149736546-igkv:0.01934)0.904:0.02935)0.775:0.01537,Vs1076-Mus_m2-149736546-igkv:0.07135)0.849:0.02319,Vs1080-Mus_m2-149736546-igkv:0.05090)0.759:0.00940,Vs1083-Mus_m2-149736546-igkv:0.01916)0.740:0.00920,Vs1079-Mus_m2-149736546-igkv:0.10594)0.789:0.02287)0.835:0.06218)0.801:0.03895)0.819:0.05271)0.914:0.07980)0.625:0.05058,(((((Vs468-Homo_sapiens-ABBA01055094.1-iglv:0.16211,((Vs472-Homo_sapiens-ABBA01055095.1-iglv:0.25726,(Vs464-Homo_sapiens-ABBA01055094.1-iglv:0.09621,(Vs475-Homo_sapiens-ABBA01055095.1-iglv:0.06401,(Vs470-Homo_sapiens-ABBA01055094.1-iglv:0.05965,Vs465-Homo_sapiens-ABBA01055094.1-iglv:0.02481)0.895:0.04967)0.249:0.03235)0.641:0.03186)0.900:0.07649,(Vs479-Homo_sapiens-ABBA01055098.1-iglv:0.10264,(Vs476-Homo_sapiens-ABBA01055095.1-iglv:0.02934,(Vs473-Homo_sapiens-ABBA01055095.1-iglv:0.09883,Vs467-Homo_sapiens-ABBA01055094.1-iglv:0.05162)0.908:0.04834)0.990:0.12109)0.322:0.02361)0.880:0.07472)0.989:0.17212,((Vs469-Homo_sapiens-ABBA01055094.1-iglv:0.01707,(Vs471-Homo_sapiens-ABBA01055095.1-iglv:0.04940,(Vs477-Homo_sapiens-ABBA01055095.1-iglv:0.02130,(Vs466-Homo_sapiens-ABBA01055094.1-iglv:0.06189,Vs474-Homo_sapiens-ABBA01055095.1-iglv:0.01803)0.751:0.01372)0.858:0.03077)0.849:0.02543)0.995:0.14894,((Vs461-Homo_sapiens-ABBA01055084.1-iglv:0.01230,((((Vs456-Homo_sapiens-ABBA01055083.1-iglv:0.03012,Vs459-Homo_sapiens-ABBA01055083.1-iglv:0.00992)0.607:0.02707,Vs462-Homo_sapiens-ABBA01055084.1-iglv:0.11391)0.770:0.02431,Vs453-Homo_sapiens-ABBA01055083.1-iglv:0.15834)0.937:0.08361,Vs454-Homo_sapiens-ABBA01055083.1-iglv:0.02068)0.325:0.05303)0.992:0.13943,Vs450-Homo_sapiens-ABBA01055082.1-iglv:0.26612)0.040:0.00050)0.901:0.06800)0.705:0.02916,((Vs449-Homo_sapiens-ABBA01055078.1-iglv:0.23590,((Vs904-Mus_m2-98207768-iglv:0.03069,Vs903-Mus_m2-98207768-iglv:0.04313)1.000:0.63158,(Vs457-Homo_sapiens-ABBA01055083.1-iglv:0.07498,Vs460-Homo_sapiens-ABBA01055083.1-iglv:0.03589)0.880:0.09593)0.578:0.09734)0.996:0.36183,((Vs45-Mus_m2-130694993-iglv:0.64654,((Vs452-Homo_sapiens-ABBA01055083.1-iglv:0.17221,(Vs455-Homo_sapiens-ABBA01055083.1-iglv:0.07731,(Vs458-Homo_sapiens-ABBA01055083.1-iglv:0.04099,Vs715-Homo_sapiens-ABBA01010264.1-iglv:0.05245)0.417:0.03871)0.935:0.10738)0.488:0.08187,(Vs280-Mus_m2-98207768-iglv:0.46923,(Vs448-Homo_sapiens-ABBA01055078.1-iglv:0.10034,Vs478-Homo_sapiens-ABBA01055098.1-iglv:0.29139)0.997:0.34812)0.727:0.06250)0.862:0.20304)0.919:0.20094,(Vs451-Homo_sapiens-ABBA01055082.1-iglv:0.38862,Vs463-Homo_sapiens-ABBA01055087.1-iglv:0.41570)0.750:0.05945)0.948:0.22376)0.847:0.09235)0.916:0.19163,((((Vs1036-Homo_sapiens-ABBA01056928.1-trgv:0.72806,(Vs113-Mus_m2-120421639-trgv:0.46753,(Vs116-Mus_m2-120421639-trgv:0.00054,(Vs853-Mus_m2-120421639-trgv:0.09687,Vs117-Mus_m2-120421639-trgv:0.02703)0.868:0.04685)0.982:0.33515)0.952:0.30243)0.826:0.17041,(Vs115-Mus_m2-120421639-trgv:0.78412,(Vs114-Mus_m2-120421639-trgv:0.68088,(Vs112-Mus_m2-120421639-trgv:0.49507,(Vs1035-Homo_sapiens-ABBA01056928.1-trgv:0.04630,((Vs1041-Homo_sapiens-ABBA01056929.1-trgv:0.03804,(Vs1039-Homo_sapiens-ABBA01056929.1-trgv:0.05004,Vs1042-Homo_sapiens-ABBA01056929.1-trgv:0.09354)0.506:0.01283)0.996:0.16162,(Vs1037-Homo_sapiens-ABBA01056929.1-trgv:0.16890,(Vs1038-Homo_sapiens-ABBA01056929.1-trgv:0.06844,Vs1040-Homo_sapiens-ABBA01056929.1-trgv:0.03587)0.673:0.08092)0.388:0.05948)0.890:0.07012)0.834:0.29458)0.996:0.79139)0.513:0.25377)0.526:0.16433)0.834:0.25226,Vs1006-Homo_sapiens-ABBA01053779.1-trav:2.15950)0.601:0.03859,(((Vs1077-Homo_sapiens-ABBA01061638.1-trav:2.15236,Vs566-Homo_sapiens-ABBA01061277.1-trdv:1.55974)0.622:0.18551,(((Vs784-Mus_m2-120129022-ighv:0.26714,((Vs770-Mus_m2-120129022-ighv:0.21648,((Vs772-Mus_m2-120129022-ighv:0.08420,(Vs777-Mus_m2-120129022-ighv:0.14709,(Vs774-Mus_m2-120129022-ighv:0.04139,Vs791-Mus_m2-120129022-ighv:0.06341)0.848:0.02192)0.756:0.00832)0.744:0.01711,(Vs776-Mus_m2-120129022-ighv:0.17990,Vs779-Mus_m2-120129022-ighv:0.17393)0.835:0.03355)0.791:0.05524)0.934:0.08753,(Vs1148-Homo_sapiens-ABBA01074086.1-ighv:0.34109,(((((Vs346-Homo_sapiens-ABBA01040614.1-ighv:0.01005,(((Vs31-Homo_sapiens-ABBA01004293.1-ighv:0.0,Vs117-Homo_sapiens-ABBA01017836.1-ighv:0.0):0.02001,Vs1149-Homo_sapiens-ABBA01074088.1-ighv:0.01035)0.950:0.04103,Vs1170-Homo_sapiens-ABBA01074102.1-ighv:0.08795)0.893:0.03121)0.262:0.00055,(Vs347-Homo_sapiens-ABBA01040614.1-ighv:0.00055,Vs630-Homo_sapiens-ABBA01098847.1-ighv:0.04295)0.395:0.00054)0.791:0.01031,(((Vs625-Homo_sapiens-ABBA01078092.1-ighv:0.0,Vs654-Homo_sapiens-ABBA01210258.1-ighv:0.0):0.01041,Vs1168-Homo_sapiens-ABBA01074100.1-ighv:0.06418)0.794:0.00449,Vs1166-Homo_sapiens-ABBA01074096.1-ighv:0.00752)0.819:0.01905)0.802:0.01667,Vs1171-Homo_sapiens-ABBA01074103.1-ighv:0.02540)0.548:0.01156,(Vs1164-Homo_sapiens-ABBA01074095.1-ighv:0.05428,Vs775-Homo_sapiens-ABBA01018841.1-ighv:0.03214)0.763:0.00967)0.895:0.08594)0.726:0.04607)0.798:0.04371)0.907:0.09123,((Vs800-Mus_m2-120129022-ighv:0.17633,((Vs809-Mus_m2-120129022-ighv:0.00054,(Vs807-Mus_m2-120129022-ighv:0.03224,Vs813-Mus_m2-120129022-ighv:0.01027)0.434:0.01063)0.968:0.09163,(Vs805-Mus_m2-120129022-ighv:0.03269,(Vs802-Mus_m2-120129022-ighv:0.08167,(Vs801-Mus_m2-120129022-ighv:0.04280,(Vs811-Mus_m2-120129022-ighv:0.07114,Vs796-Mus_m2-120129022-ighv:0.00055)0.819:0.01143)0.812:0.02286)0.912:0.00055)0.752:0.01550)0.953:0.11823)0.887:0.06788,((((Vs1165-Homo_sapiens-ABBA01074095.1-ighv:0.06950,Vs707-Homo_sapiens-ABBA01009461.1-ighv:0.06316)0.845:0.07128,(Vs15-Homo_sapiens-ABBA01000439.1-ighv:0.01179,Vs342-Homo_sapiens-ABBA01040608.1-ighv:0.03123)0.916:0.05470)0.753:0.01521,Vs1153-Homo_sapiens-ABBA01074091.1-ighv:0.08202)0.981:0.11982,(((Vs740-Mus_m2-120129022-ighv:0.24585,(Vs738-Mus_m2-120129022-ighv:0.03642,(Vs730-Mus_m2-120129022-ighv:0.03554,Vs722-Mus_m2-120129022-ighv:0.06825)0.828:0.02074)0.386:0.03121)0.469:0.01355,Vs718-Mus_m2-120129022-ighv:0.02570)0.462:0.00864,Vs734-Mus_m2-120129022-ighv:0.06095)0.929:0.07393)0.998:0.25211)0.866:0.07222)0.933:0.23268,(((Vs792-Mus_m2-120129022-ighv:0.15853,(Vs788-Mus_m2-120129022-ighv:0.00055,Vs790-Mus_m2-120129022-ighv:0.02105)1.000:0.20906)0.913:0.08109,(((Vs1152-Homo_sapiens-ABBA01074091.1-ighv:0.06747,((((((Vs767-Mus_m2-120129022-ighv:0.09185,(Vs768-Mus_m2-120129022-ighv:0.14236,Vs766-Mus_m2-120129022-ighv:0.01113)0.782:0.00976)0.884:0.04524,(Vs769-Mus_m2-120129022-ighv:0.03072,Vs765-Mus_m2-120129022-ighv:0.14719)0.348:0.02975)0.970:0.09025,(Vs775-Mus_m2-120129022-ighv:0.17817,Vs771-Mus_m2-120129022-ighv:0.28654)0.786:0.05395)0.872:0.05248,(Vs761-Mus_m2-120129022-ighv:0.02481,Vs764-Mus_m2-120129022-ighv:0.01502)0.989:0.14057)0.894:0.06267,(((Vs795-Mus_m2-120129022-ighv:0.14356,(Vs781-Mus_m2-120129022-ighv:0.02215,(Vs794-Mus_m2-120129022-ighv:0.09470,Vs778-Mus_m2-120129022-ighv:0.10476)0.740:0.00794)0.932:0.07052)0.989:0.12980,(Vs35-Homo_sapiens-ABBA01004577.1-ighv:0.07260,Vs341-Homo_sapiens-ABBA01040607.1-ighv:0.03074)0.834:0.01944)0.467:0.02364,(Vs1161-Homo_sapiens-ABBA01074094.1-ighv:0.10930,(Vs340-Homo_sapiens-ABBA01040607.1-ighv:0.08746,Vs351-Homo_sapiens-ABBA01040616.1-ighv:0.11665)0.097:0.02235)0.136:0.01041)0.887:0.06059)0.960:0.08902,(((((Vs6-Homo_sapiens-ABBA01181057.1-ighv:0.0,Vs1167-Homo_sapiens-ABBA01074098.1-ighv:0.0):0.01025,Vs675-Homo_sapiens-ABBA01003309.1-ighv:0.01066)0.988:0.09485,(((Vs345-Homo_sapiens-ABBA01040613.1-ighv:0.03033,Vs427-Homo_sapiens-ABBA01050780.1-ighv:0.03858)0.769:0.01425,((Vs1162-Homo_sapiens-ABBA01074094.1-ighv:0.08193,(Vs645-Homo_sapiens-ABBA01171626.1-ighv:0.04406,(Vs11-Homo_sapiens-ABBA01245278.1-ighv:0.01089,Vs353-Homo_sapiens-ABBA01040616.1-ighv:0.02193)0.996:0.09410)0.752:0.01108)0.972:0.05455,(Vs1156-Homo_sapiens-ABBA01074094.1-ighv:0.02580,(Vs1172-Homo_sapiens-ABBA01074103.1-ighv:0.08012,(Vs349-Homo_sapiens-ABBA01040615.1-ighv:0.01039,Vs344-Homo_sapiens-ABBA01040613.1-ighv:0.01061)0.895:0.03581)0.866:0.03595)0.805:0.02539)0.614:0.00411)0.359:0.00054,((Vs356-Homo_sapiens-ABBA01040618.1-ighv:0.04394,(Vs1154-Homo_sapiens-ABBA01074092.1-ighv:0.04187,Vs1158-Homo_sapiens-ABBA01074094.1-ighv:0.07036)0.691:0.02358)0.920:0.05231,(Vs1169-Homo_sapiens-ABBA01074102.1-ighv:0.02106,Vs1159-Homo_sapiens-ABBA01074094.1-ighv:0.05687)0.995:0.12274)0.649:0.02660)0.850:0.02804)0.901:0.04045,(Vs339-Homo_sapiens-ABBA01040607.1-ighv:0.00055,Vs51-Homo_sapiens-ABBA01007185.1-ighv:0.06338)0.902:0.02419)0.603:0.01257,((Vs425-Homo_sapiens-ABBA01050774.1-ighv:0.00054,(Vs1163-Homo_sapiens-ABBA01074094.1-ighv:0.01007,(Vs14-Homo_sapiens-ABBA01000439.1-ighv:0.00055,(Vs352-Homo_sapiens-ABBA01040616.1-ighv:0.03046,Vs1157-Homo_sapiens-ABBA01074094.1-ighv:0.01020)0.631:0.02071)0.948:0.04159)0.444:0.03213)0.448:0.04820,Vs647-Homo_sapiens-ABBA01174541.1-ighv:0.09369)0.965:0.08552)0.334:0.01122)0.733:0.01172)0.275:0.03158,Vs786-Mus_m2-120129022-ighv:0.36167)0.369:0.01509,(Vs798-Mus_m2-120129022-ighv:0.16582,(Vs814-Mus_m2-120129022-ighv:0.27090,((Vs803-Mus_m2-120129022-ighv:0.10331,((Vs804-Mus_m2-120129022-ighv:0.06086,(Vs799-Mus_m2-120129022-ighv:0.15013,Vs797-Mus_m2-120129022-ighv:0.05020)0.944:0.07881)0.379:0.02260,(Vs808-Mus_m2-120129022-ighv:0.07696,(Vs810-Mus_m2-120129022-ighv:0.03106,Vs812-Mus_m2-120129022-ighv:0.04361)0.221:0.00054)0.847:0.03090)0.826:0.02257)0.572:0.01042,Vs806-Mus_m2-120129022-ighv:0.05773)0.769:0.03902)0.435:0.03615)0.866:0.04543)0.845:0.04398)0.931:0.14059,((Vs426-Homo_sapiens-ABBA01050775.1-ighv:0.02689,Vs350-Homo_sapiens-ABBA01040615.1-ighv:0.07023)0.983:0.21460,((((Vs739-Mus_m2-120129022-ighv:0.22422,Vs759-Mus_m2-120129022-ighv:0.45110)0.910:0.12831,((Vs763-Mus_m2-120129022-ighv:0.03181,Vs760-Mus_m2-120129022-ighv:0.01032)0.979:0.06402,((((Vs756-Mus_m2-120129022-ighv:0.05698,Vs754-Mus_m2-120129022-ighv:0.19018)0.793:0.06054,((((Vs729-Mus_m2-120129022-ighv:0.12038,Vs762-Mus_m2-120129022-ighv:0.16006)0.847:0.03379,(Vs755-Mus_m2-120129022-ighv:0.05968,(((((Vs749-Mus_m2-120129022-ighv:0.00053,Vs753-Mus_m2-120129022-ighv:0.05295)0.879:0.02048,(Vs750-Mus_m2-120129022-ighv:0.02013,Vs747-Mus_m2-120129022-ighv:0.03169)0.762:0.01004)0.901:0.02071,(((Vs744-Mus_m2-120129022-ighv:0.06960,(Vs743-Mus_m2-120129022-ighv:0.03894,Vs742-Mus_m2-120129022-ighv:0.01190)0.966:0.06948)0.786:0.03804,Vs720-Mus_m2-120129022-ighv:0.16686)0.678:0.00355,(Vs746-Mus_m2-120129022-ighv:0.07541,Vs752-Mus_m2-120129022-ighv:0.01999)0.756:0.01052)0.888:0.02103)0.562:0.01580,(Vs748-Mus_m2-120129022-ighv:0.06692,(Vs745-Mus_m2-120129022-ighv:0.02078,Vs751-Mus_m2-120129022-ighv:0.02077)0.981:0.06882)0.019:0.01533)0.942:0.07249,Vs741-Mus_m2-120129022-ighv:0.19186)0.828:0.06519)0.877:0.05393)0.774:0.01906,(((Vs733-Mus_m2-120129022-ighv:0.08077,Vs724-Mus_m2-120129022-ighv:0.08207)0.875:0.03397,((((Vs731-Mus_m2-120129022-ighv:0.03394,Vs726-Mus_m2-120129022-ighv:0.07702)0.794:0.03850,((Vs707-Mus_m2-120129022-ighv:0.01051,Vs721-Mus_m2-120129022-ighv:0.05433)0.493:0.02366,(Vs714-Mus_m2-120129022-ighv:0.02112,(Vs712-Mus_m2-120129022-ighv:0.01911,Vs713-Mus_m2-120129022-ighv:0.05656)0.946:0.04345)0.381:0.01153)0.907:0.04481)0.948:0.06304,Vs732-Mus_m2-120129022-ighv:0.03578)0.725:0.01225,Vs758-Mus_m2-120129022-ighv:0.12025)0.791:0.01155)0.816:0.02145,((Vs709-Mus_m2-120129022-ighv:0.11911,(Vs711-Mus_m2-120129022-ighv:0.10729,Vs706-Mus_m2-120129022-ighv:0.06496)0.500:0.01445)0.177:0.01479,(Vs717-Mus_m2-120129022-ighv:0.0,Vs725-Mus_m2-120129022-ighv:0.0):0.08446)0.946:0.05952)0.802:0.03747)0.746:0.01710,(Vs708-Mus_m2-120129022-ighv:0.02141,Vs710-Mus_m2-120129022-ighv:0.02065)0.999:0.08684)0.000:0.00055)0.782:0.01755,Vs757-Mus_m2-120129022-ighv:0.29300)0.068:0.01471,((Vs715-Mus_m2-120129022-ighv:0.01866,((Vs736-Mus_m2-120129022-ighv:0.01076,Vs727-Mus_m2-120129022-ighv:0.02076)0.945:0.05876,(Vs719-Mus_m2-120129022-ighv:0.02035,(Vs737-Mus_m2-120129022-ighv:0.01122,Vs728-Mus_m2-120129022-ighv:0.02986)0.793:0.01022)0.774:0.01630)0.774:0.01877)0.880:0.02343,(Vs735-Mus_m2-120129022-ighv:0.02214,(Vs716-Mus_m2-120129022-ighv:0.04123,Vs723-Mus_m2-120129022-ighv:0.02980)0.868:0.02169)0.921:0.03121)0.877:0.02088)0.853:0.00055)0.805:0.02205)0.846:0.03991,(Vs789-Mus_m2-120129022-ighv:0.03002,(Vs787-Mus_m2-120129022-ighv:0.06581,(Vs780-Mus_m2-120129022-ighv:0.03377,Vs793-Mus_m2-120129022-ighv:0.01790)0.844:0.02129)0.309:0.00865)0.998:0.18659)0.950:0.11962,((((Vs1160-Homo_sapiens-ABBA01074094.1-ighv:0.07518,(Vs16-Homo_sapiens-ABBA01000440.1-ighv:0.00055,Vs343-Homo_sapiens-ABBA01040608.1-ighv:0.00955)0.997:0.15098)0.760:0.01589,(Vs338-Homo_sapiens-ABBA01040607.1-ighv:0.12479,((Vs782-Mus_m2-120129022-ighv:0.01482,(Vs773-Mus_m2-120129022-ighv:0.12438,(Vs783-Mus_m2-120129022-ighv:0.02322,Vs785-Mus_m2-120129022-ighv:0.07532)0.860:0.02557)0.750:0.01966)1.000:0.29949,Vs1150-Homo_sapiens-ABBA01074089.1-ighv:0.03290)0.702:0.00979)1.000:0.22443)0.862:0.02811,((Vs354-Homo_sapiens-ABBA01040616.1-ighv:0.05170,(Vs1151-Homo_sapiens-ABBA01074091.1-ighv:0.07416,(Vs96-Homo_sapiens-ABBA01015827.1-ighv:0.06197,Vs1147-Homo_sapiens-ABBA01074086.1-ighv:0.02658)0.861:0.02626)0.873:0.02586)0.827:0.01443,(Vs1207-Homo_sapiens-ABBA01134518.1-ighv:0.16555,((Vs348-Homo_sapiens-ABBA01040614.1-ighv:0.16815,Vs1146-Homo_sapiens-ABBA01074086.1-ighv:0.06545)0.380:0.03952,Vs355-Homo_sapiens-ABBA01040616.1-ighv:0.15558)0.000:0.00054)0.324:0.00055)0.673:0.01019)0.897:0.00055,(Vs658-Homo_sapiens-ABBA01000438.1-ighv:0.06937,Vs1155-Homo_sapiens-ABBA01074094.1-ighv:0.08623)0.996:0.15626)0.793:0.05707)0.780:0.13455)0.986:0.26058)0.694:0.12168)0.926:0.42136)0.869:0.33052,((((Vs526-Homo_sapiens-ABBA01061266.1-trav:0.18221,Vs148-Mus_m2-124902244-trav:0.18623)0.959:0.26174,(Vs554-Homo_sapiens-ABBA01061270.1-trav:0.16394,(Vs557-Homo_sapiens-ABBA01061272.1-trav:0.14956,Vs245-Mus_m2-124902244-trav:0.19393)0.962:0.15719)0.656:0.06189)1.000:0.99741,(((Vs1072-Homo_sapiens-ABBA01061278.1-trdv:0.23081,Vs865-Mus_m2-124902244-trdv:0.26725)1.000:0.72718,(((Vs247-Mus_m2-124902244-trdv:0.00376,Vs248-Mus_m2-124902244-trdv:0.01688)1.000:0.28540,(Vs561-Homo_sapiens-ABBA01061272.1-trav:0.04052,Vs562-Homo_sapiens-ABBA01061272.1-trav:0.03251)0.688:0.01431)0.970:0.16784,((Vs542-Homo_sapiens-ABBA01061267.1-trav:0.18362,(Vs239-Mus_m2-124902244-trav:0.00054,(Vs183-Mus_m2-124902244-trav:0.00968,Vs208-Mus_m2-124902244-trav:0.00975)0.834:0.00968)1.000:0.32045)0.235:0.03322,(Vs551-Homo_sapiens-ABBA01061270.1-trdv:0.20222,((Vs231-Mus_m2-124902244-trdv:0.03164,(Vs199-Mus_m2-124902244-trdv:0.0,Vs175-Mus_m2-124902244-trdv:0.0):0.02046)0.944:0.14290,((Vs168-Mus_m2-124902244-trdv:0.0,Vs192-Mus_m2-124902244-trdv:0.0):0.01755,Vs225-Mus_m2-124902244-trdv:0.12043)0.986:0.20876)0.995:0.25152)0.942:0.16459)0.900:0.10492)0.938:0.31140)0.810:0.12805,((Vs286-Homo_sapiens-ABBA01034129.1-trbv:1.28050,((Vs525-Homo_sapiens-ABBA01061266.1-trav:0.20070,(((((Vs530-Homo_sapiens-ABBA01061266.1-trav:0.23928,((Vs233-Mus_m2-124902244-trav:0.01133,((Vs196-Mus_m2-124902244-trav:0.0,Vs172-Mus_m2-124902244-trav:0.0):0.03550,(Vs201-Mus_m2-124902244-trav:0.03481,((Vs169-Mus_m2-124902244-trav:0.0,Vs193-Mus_m2-124902244-trav:0.0):0.01117,Vs226-Mus_m2-124902244-trav:0.00055)0.775:0.01119)0.794:0.01123)0.089:0.00054)0.884:0.05926,(Vs217-Mus_m2-124902244-trav:0.00054,Vs160-Mus_m2-124902244-trav:0.02190)1.000:0.23975)0.971:0.12499)0.493:0.02279,(Vs540-Homo_sapiens-ABBA01061267.1-trav:0.53256,Vs536-Homo_sapiens-ABBA01061266.1-trav:0.00054)0.975:0.11045)0.860:0.07294,Vs243-Mus_m2-124902244-trav:0.25742)0.937:0.11571,(Vs545-Homo_sapiens-ABBA01061267.1-trav:0.10424,(Vs535-Homo_sapiens-ABBA01061266.1-trav:0.08033,Vs539-Homo_sapiens-ABBA01061266.1-trav:0.04385)0.925:0.08093)0.845:0.07584)0.855:0.07116,Vs546-Homo_sapiens-ABBA01061267.1-trav:0.41139)0.889:0.10969)0.894:0.18740,((((Vs166-Mus_m2-124902244-trav:0.0,Vs190-Mus_m2-124902244-trav:0.0):0.03085,Vs223-Mus_m2-124902244-trav:0.07408)0.845:0.03510,((Vs195-Mus_m2-124902244-trav:0.0,Vs171-Mus_m2-124902244-trav:0.0):0.03360,(((Vs197-Mus_m2-124902244-trav:0.0,Vs173-Mus_m2-124902244-trav:0.0):0.00053,Vs229-Mus_m2-124902244-trav:0.05294)0.976:0.06854,Vs228-Mus_m2-124902244-trav:0.02855)0.849:0.02658)0.819:0.02481)0.999:0.38331,(Vs564-Homo_sapiens-ABBA01061273.1-trav:0.82656,((Vs188-Mus_m2-124902244-trav:0.01918,(Vs163-Mus_m2-124902244-trav:0.0,Vs220-Mus_m2-124902244-trav:0.0):0.03447)0.939:0.10777,((Vs531-Homo_sapiens-ABBA01061266.1-trav:0.21479,(Vs218-Mus_m2-124902244-trav:0.00055,(Vs161-Mus_m2-124902244-trav:0.05610,Vs186-Mus_m2-124902244-trav:0.00055)0.512:0.01083)0.950:0.09525)0.934:0.08779,((((Vs204-Mus_m2-124902244-trav:0.0,Vs179-Mus_m2-124902244-trav:0.0):0.03434,Vs236-Mus_m2-124902244-trav:0.00054)0.997:0.18333,((Vs212-Mus_m2-124902244-trav:0.01078,Vs155-Mus_m2-124902244-trav:0.00054)0.986:0.08080,(Vs153-Mus_m2-124902244-trav:0.02250,(Vs151-Mus_m2-124902244-trav:0.00054,(Vs214-Mus_m2-124902244-trav:0.02129,Vs157-Mus_m2-124902244-trav:0.00055)0.990:0.08318)0.525:0.03414)0.822:0.02222)0.880:0.04897)0.254:0.02970,Vs543-Homo_sapiens-ABBA01061267.1-trav:0.21390)0.542:0.03940)0.776:0.04092)0.789:0.08696)0.839:0.13120)0.891:0.21666)0.939:0.42296)0.765:0.14712,((Vs524-Homo_sapiens-ABBA01061265.1-trav:0.02572,(Vs147-Mus_m2-124902244-trav:0.35872,Vs523-Homo_sapiens-ABBA01061263.1-trav:0.13927)0.200:0.08468)1.000:0.85970,((((Vs527-Homo_sapiens-ABBA01061266.1-trav:0.19244,((Vs241-Mus_m2-124902244-trav:0.01014,Vs149-Mus_m2-124902244-trav:0.03746)0.715:0.01886,(Vs232-Mus_m2-124902244-trav:0.03445,(Vs176-Mus_m2-124902244-trav:0.0,Vs200-Mus_m2-124902244-trav:0.0):0.01031)0.993:0.16107)0.988:0.19386)0.880:0.07970,(Vs541-Homo_sapiens-ABBA01061267.1-trav:0.28969,((Vs150-Mus_m2-124902244-trav:0.16449,((Vs203-Mus_m2-124902244-trav:0.0,Vs178-Mus_m2-124902244-trav:0.0):0.01546,Vs235-Mus_m2-124902244-trav:0.02630)0.992:0.16273)0.825:0.07212,(((Vs219-Mus_m2-124902244-trav:0.0,Vs162-Mus_m2-124902244-trav:0.0):0.01074,Vs187-Mus_m2-124902244-trav:0.00055)0.984:0.16100,Vs537-Homo_sapiens-ABBA01061266.1-trav:0.20786)0.158:0.03605)0.832:0.05130)0.908:0.09239)0.992:0.29166,((Vs538-Homo_sapiens-ABBA01061266.1-trav:0.08652,(Vs544-Homo_sapiens-ABBA01061267.1-trav:0.12988,Vs534-Homo_sapiens-ABBA01061266.1-trav:0.22658)0.910:0.06845)0.972:0.17814,(((Vs189-Mus_m2-124902244-trav:0.0,Vs165-Mus_m2-124902244-trav:0.0):0.06416,Vs222-Mus_m2-124902244-trav:0.04201)0.980:0.14934,(((Vs180-Mus_m2-124902244-trav:0.0,Vs205-Mus_m2-124902244-trav:0.0):0.02177,Vs237-Mus_m2-124902244-trav:0.03876)0.993:0.14319,((Vs213-Mus_m2-124902244-trav:0.0,Vs156-Mus_m2-124902244-trav:0.0):0.06002,((Vs210-Mus_m2-124902244-trav:0.0,Vs154-Mus_m2-124902244-trav:0.0):0.08917,(Vs152-Mus_m2-124902244-trav:0.01125,((Vs215-Mus_m2-124902244-trav:0.0,Vs158-Mus_m2-124902244-trav:0.0):0.02213,Vs185-Mus_m2-124902244-trav:0.00054)0.961:0.05741)0.853:0.05484)0.866:0.03456)0.795:0.02855)0.346:0.03113)0.946:0.12830)0.993:0.26653)0.250:0.09917,((((Vs528-Homo_sapiens-ABBA01061266.1-trav:0.41984,(Vs547-Homo_sapiens-ABBA01061267.1-trav:0.05603,((Vs216-Mus_m2-124902244-trav:0.01085,Vs159-Mus_m2-124902244-trav:0.01037)0.934:0.08412,(Vs207-Mus_m2-124902244-trav:0.04334,(Vs182-Mus_m2-124902244-trav:0.03651,Vs238-Mus_m2-124902244-trav:0.02737)0.891:0.03663)0.942:0.09209)0.985:0.20584)0.982:0.23373)0.930:0.17100,((Vs556-Homo_sapiens-ABBA01061271.1-trav:0.34760,(Vs558-Homo_sapiens-ABBA01061272.1-trav:0.15472,Vs246-Mus_m2-124902244-trdv:0.47425)0.316:0.05021)0.986:0.23530,(Vs559-Homo_sapiens-ABBA01061272.1-trav:0.38079,(Vs244-Mus_m2-124902244-trav:0.34105,(Vs555-Homo_sapiens-ABBA01061271.1-trav:0.19201,Vs553-Homo_sapiens-ABBA01061270.1-trav:0.38805)0.586:0.03437)0.931:0.17386)0.910:0.15856)0.973:0.21259)0.218:0.05786,((Vs532-Homo_sapiens-ABBA01061266.1-trav:0.19306,(Vs164-Mus_m2-124902244-trav:0.0,Vs221-Mus_m2-124902244-trav:0.0):0.33039)0.998:0.35702,((Vs533-Homo_sapiens-ABBA01061266.1-trav:0.65429,Vs549-Homo_sapiens-ABBA01061268.1-trav:0.32105)0.902:0.17262,(Vs565-Homo_sapiens-ABBA01061274.1-trav:0.44608,(((Vs224-Mus_m2-124902244-trav:0.01126,(((Vs181-Mus_m2-124902244-trav:0.0,Vs206-Mus_m2-124902244-trav:0.0):0.18189,(Vs209-Mus_m2-124902244-trav:0.04767,Vs242-Mus_m2-124902244-trav:0.27260)0.898:0.05220)0.820:0.02681,(Vs167-Mus_m2-124902244-trav:0.00055,Vs191-Mus_m2-124902244-trav:0.01005)0.895:0.02059)0.846:0.01954)0.713:0.04124,(Vs230-Mus_m2-124902244-trav:0.05326,(Vs184-Mus_m2-124902244-trav:0.00054,(Vs240-Mus_m2-124902244-trav:0.02167,(Vs198-Mus_m2-124902244-trav:0.0,Vs174-Mus_m2-124902244-trav:0.0):0.04168)0.874:0.02094)0.737:0.01070)0.727:0.06094)0.957:0.15620,(Vs550-Homo_sapiens-ABBA01061268.1-trav:0.14342,(Vs211-Mus_m2-124902244-trav:0.12635,(Vs234-Mus_m2-124902244-trav:0.00226,((Vs202-Mus_m2-124902244-trav:0.0,Vs177-Mus_m2-124902244-trav:0.0):0.02820,((Vs194-Mus_m2-124902244-trav:0.0,Vs170-Mus_m2-124902244-trav:0.0):0.01122,Vs227-Mus_m2-124902244-trav:0.00055)1.000:0.19599)0.078:0.02574)0.928:0.11057)0.999:0.37766)0.515:0.10883)0.998:0.40931)0.895:0.15344)0.403:0.03415)0.770:0.03984)0.843:0.08926,((Vs552-Homo_sapiens-ABBA01061270.1-trav:0.47827,Vs560-Homo_sapiens-ABBA01061272.1-trav:0.48813)0.805:0.12224,(Vs563-Homo_sapiens-ABBA01061273.1-trav:0.56822,(Vs548-Homo_sapiens-ABBA01061268.1-trav:0.34637,Vs529-Homo_sapiens-ABBA01061266.1-trav:0.48036)0.669:0.09052)0.385:0.03819)0.640:0.05316)0.359:0.14128)0.801:0.30357)0.880:0.19890)0.799:0.11001)0.649:0.04679)0.860:0.21387,(((Vs278-Homo_sapiens-ABBA01034128.1-trbv:0.09125,Vs1102-Homo_sapiens-ABBA01065043.1-trbv:0.04191)0.906:0.19856,(Vs473-Mus_m2-149736546-trbv:0.31161,(Vs285-Homo_sapiens-ABBA01034128.1-trbv:0.01164,Vs1101-Homo_sapiens-ABBA01065042.1-trbv:0.05745)0.970:0.15486)0.517:0.11885)1.000:1.02977,((Vs277-Homo_sapiens-ABBA01034128.1-trbv:0.45886,(Vs281-Homo_sapiens-ABBA01034128.1-trbv:0.38365,((((Vs250-Homo_sapiens-ABBA01034125.1-trbv:0.25541,((Vs260-Homo_sapiens-ABBA01034125.1-trbv:0.07640,(Vs257-Homo_sapiens-ABBA01034125.1-trbv:0.05330,(Vs264-Homo_sapiens-ABBA01034125.1-trbv:0.03245,Vs263-Homo_sapiens-ABBA01034125.1-trbv:0.06716)0.873:0.03169)0.173:0.01476)0.385:0.01022,(Vs1210-Homo_sapiens-ABBA01137902.1-trbv:0.10727,Vs246-Homo_sapiens-ABBA01034123.1-trbv:0.08617)0.907:0.06161)0.950:0.13067)0.967:0.16179,(Vs255-Homo_sapiens-ABBA01034125.1-trbv:0.19424,(Vs269-Homo_sapiens-ABBA01034125.1-trbv:0.15688,(Vs460-Mus_m2-149736546-trbv:0.16604,(Vs462-Mus_m2-149736546-trbv:0.03892,Vs463-Mus_m2-149736546-trbv:0.07036)0.716:0.03229)1.000:0.27719)0.626:0.01320)0.891:0.07579)0.879:0.11207,(Vs282-Homo_sapiens-ABBA01034128.1-trbv:0.01354,(Vs3-Homo_sapiens-ABBA01174525.1-trbv:0.00055,(Vs1100-Homo_sapiens-ABBA01065042.1-trbv:0.0,Vs1205-Homo_sapiens-ABBA01122758.1-trbv:0.0):0.01062)1.000:0.27740)1.000:0.37445)0.898:0.09543,(Vs283-Homo_sapiens-ABBA01034128.1-trbv:0.26038,(Vs284-Homo_sapiens-ABBA01034128.1-trbv:0.13750,Vs472-Mus_m2-149736546-trbv:0.24737)0.984:0.21244)0.882:0.08165)0.280:0.02281)0.756:0.06896)0.975:0.32144,((Vs275-Homo_sapiens-ABBA01034126.1-trbv:0.23418,Vs467-Mus_m2-149736546-trbv:0.29985)0.997:0.48672,(((Vs253-Homo_sapiens-ABBA01034125.1-trbv:0.21020,((Vs268-Homo_sapiens-ABBA01034125.1-trbv:0.21603,(Vs459-Mus_m2-149736546-trbv:0.08396,Vs461-Mus_m2-149736546-trbv:0.10366)0.997:0.25064)0.922:0.12652,(((Vs252-Homo_sapiens-ABBA01034125.1-trbv:0.11657,Vs245-Homo_sapiens-ABBA01034123.1-trbv:0.19291)0.776:0.12608,(Vs259-Homo_sapiens-ABBA01034125.1-trbv:0.12331,(Vs262-Homo_sapiens-ABBA01034125.1-trbv:0.06371,Vs261-Homo_sapiens-ABBA01034125.1-trbv:0.06039)0.610:0.02227)0.668:0.00515)0.655:0.04659,Vs266-Homo_sapiens-ABBA01034125.1-trbv:0.10332)0.998:0.21448)0.672:0.03209)0.964:0.27692,((((Vs469-Mus_m2-149736546-trbv:0.26591,(Vs279-Homo_sapiens-ABBA01034128.1-trbv:0.10340,Vs1103-Homo_sapiens-ABBA01065043.1-trbv:0.06976)0.981:0.18729)0.871:0.08450,(((Vs280-Homo_sapiens-ABBA01034128.1-trbv:0.01492,Vs1104-Homo_sapiens-ABBA01065043.1-trbv:0.11643)0.981:0.17840,(Vs471-Mus_m2-149736546-trbv:0.15861,Vs470-Mus_m2-149736546-trbv:0.31370)0.870:0.10158)0.950:0.16242,Vs276-Homo_sapiens-ABBA01034126.1-trbv:0.30331)0.218:0.10090)0.922:0.14949,Vs882-Homo_sapiens-ABBA01034127.1-trbv:0.43516)0.875:0.17356,(((Vs466-Mus_m2-149736546-trbv:0.21909,(Vs465-Mus_m2-149736546-trbv:0.29371,(Vs273-Homo_sapiens-ABBA01034126.1-trbv:0.18288,(Vs271-Homo_sapiens-ABBA01034125.1-trbv:0.00054,Vs272-Homo_sapiens-ABBA01034125.1-trbv:0.02092)0.991:0.12241)0.859:0.04504)0.742:0.02440)0.979:0.15617,((Vs267-Homo_sapiens-ABBA01034125.1-trbv:0.16302,((Vs251-Homo_sapiens-ABBA01034125.1-trbv:0.11011,Vs249-Homo_sapiens-ABBA01034125.1-trbv:0.08462)0.991:0.16072,(Vs265-Homo_sapiens-ABBA01034125.1-trbv:0.07021,Vs258-Homo_sapiens-ABBA01034125.1-trbv:0.13546)0.817:0.03453)0.241:0.06146)0.803:0.10633,(Vs464-Mus_m2-149736546-trbv:0.26507,(Vs254-Homo_sapiens-ABBA01034125.1-trbv:0.04411,(Vs256-Homo_sapiens-ABBA01034125.1-trbv:0.06800,Vs270-Homo_sapiens-ABBA01034125.1-trbv:0.13484)0.795:0.06761)0.920:0.14492)0.969:0.19488)0.758:0.06972)0.362:0.03965,(Vs274-Homo_sapiens-ABBA01034126.1-trbv:0.40967,(Vs242-Homo_sapiens-ABBA01034123.1-trbv:0.22125,Vs456-Mus_m2-149736546-trbv:0.19834)0.995:0.31678)0.832:0.08515)0.934:0.14075)0.901:0.15433)0.975:0.28198,((Vs243-Homo_sapiens-ABBA01034123.1-trbv:0.06591,Vs457-Mus_m2-149736546-trbv:0.20837)0.662:0.13983,(Vs455-Mus_m2-149736546-trbv:0.42564,(Vs458-Mus_m2-149736546-trbv:0.25323,(Vs244-Homo_sapiens-ABBA01034123.1-trbv:0.14194,(Vs247-Homo_sapiens-ABBA01034123.1-trbv:0.00054,Vs248-Homo_sapiens-ABBA01034124.1-trbv:0.05205)0.912:0.08904)0.923:0.12323)0.899:0.10366)0.833:0.10021)0.997:0.51255)0.350:0.07894)0.789:0.09146)0.876:0.25905)0.854:0.25325)0.869:0.20000)0.646:0.10751)0.966:0.27344)0.969:0.29381,((((Vs1098-Mus_m2-149736546-igkv:0.16016,(Vs1089-Mus_m2-149736546-igkv:0.20012,(Vs1091-Mus_m2-149736546-igkv:0.06651,(Vs1095-Mus_m2-149736546-igkv:0.00054,Vs1093-Mus_m2-149736546-igkv:0.01994)0.916:0.03714)0.296:0.01030)0.729:0.04045)0.986:0.14543,(Vs659-Homo_sapiens-ABBA01000472.1-igkv:0.11367,((Vs4-Homo_sapiens-ABBA01180083.1-igkv:0.0,Vs624-Homo_sapiens-ABBA01077349.1-igkv:0.0):0.00980,Vs1194-Homo_sapiens-ABBA01076850.1-igkv:0.01003)0.983:0.09521)0.779:0.02913)0.750:0.06260,(Vs125-Homo_sapiens-ABBA01018823.1-igkv:0.20786,(Vs483-Mus_m2-149736546-igkv:0.00055,(Vs487-Mus_m2-149736546-igkv:0.02134,Vs289-Mus_m2-94987271-igkv:0.05628)0.200:0.01956)0.998:0.28483)0.997:0.34352)0.805:0.04746,((Vs1130-Mus_m2-149736546-igkv:0.20122,(Vs1129-Mus_m2-149736546-igkv:0.08107,(((((((Vs1119-Mus_m2-149736546-igkv:0.07666,Vs1121-Mus_m2-149736546-igkv:0.10080)0.411:0.02011,(((Vs1111-Mus_m2-149736546-igkv:0.04129,Vs1103-Mus_m2-149736546-igkv:0.03109)0.907:0.03026,(Vs1110-Mus_m2-149736546-igkv:0.05762,(Vs1120-Mus_m2-149736546-igkv:0.01690,Vs1104-Mus_m2-149736546-igkv:0.12403)0.893:0.03190)0.694:0.00522)0.782:0.00940,(Vs1116-Mus_m2-149736546-igkv:0.05121,(Vs1113-Mus_m2-149736546-igkv:0.03016,Vs1117-Mus_m2-149736546-igkv:0.06130)0.720:0.01002)0.865:0.01988)1.000:0.00377)0.779:0.00601,(Vs1105-Mus_m2-149736546-igkv:0.02995,(Vs1115-Mus_m2-149736546-igkv:0.03624,Vs1114-Mus_m2-149736546-igkv:0.04874)0.875:0.02724)0.758:0.00987)0.781:0.00960,(Vs1118-Mus_m2-149736546-igkv:0.06146,Vs1109-Mus_m2-149736546-igkv:0.03799)0.747:0.01180)0.795:0.00937,((Vs1112-Mus_m2-149736546-igkv:0.08563,(Vs1106-Mus_m2-149736546-igkv:0.04143,(Vs1122-Mus_m2-149736546-igkv:0.05083,(Vs1100-Mus_m2-149736546-igkv:0.04938,Vs1107-Mus_m2-149736546-igkv:0.04998)0.872:0.02001)0.841:0.01913)0.863:0.01940)0.017:0.00912,Vs1099-Mus_m2-149736546-igkv:0.16093)0.779:0.01018)0.923:0.03810,(Vs1124-Mus_m2-149736546-igkv:0.12593,(Vs1108-Mus_m2-149736546-igkv:0.01986,Vs1102-Mus_m2-149736546-igkv:0.03003)0.955:0.05094)0.679:0.01148)0.854:0.03760,Vs1128-Mus_m2-149736546-igkv:0.11637)0.916:0.07690)0.786:0.03084)0.995:0.16003,(Vs774-Homo_sapiens-ABBA01018824.1-igkv:0.17176,((Vs513-Mus_m2-149736546-igkv:0.10898,((Vs515-Mus_m2-149736546-igkv:0.01945,Vs512-Mus_m2-149736546-igkv:0.03941)0.878:0.03089,((Vs518-Mus_m2-149736546-igkv:0.07147,Vs519-Mus_m2-149736546-igkv:0.06768)0.943:0.07833,((Vs514-Mus_m2-149736546-igkv:0.06112,Vs511-Mus_m2-149736546-igkv:0.01365)0.975:0.08846,(Vs516-Mus_m2-149736546-igkv:0.04011,Vs517-Mus_m2-149736546-igkv:0.04036)0.756:0.01049)0.784:0.03990)0.902:0.03952)0.671:0.02267)0.189:0.02066,Vs508-Mus_m2-149736546-igkv:0.51775)0.859:0.05812)0.979:0.14115)0.471:0.03772)0.835:0.05623)0.635:0.06277)0.941:0.07507,Vs498-Mus_m2-149736546-igkv:0.25643)0.665:0.02430,(Vs497-Mus_m2-149736546-igkv:0.42822,(Vs503-Mus_m2-149736546-igkv:0.19030,(Vs1097-Mus_m2-149736546-igkv:0.19473,(Vs1127-Mus_m2-149736546-igkv:0.19133,(Vs1090-Mus_m2-149736546-igkv:0.16074,(Vs1096-Mus_m2-149736546-igkv:0.04689,(Vs1094-Mus_m2-149736546-igkv:0.04498,Vs1092-Mus_m2-149736546-igkv:0.04019)0.364:0.02614)0.943:0.06988)0.753:0.01141)0.726:0.02296)0.871:0.03815)0.328:0.01582)0.985:0.14760)0.767:0.02502,(Vs500-Mus_m2-149736546-igkv:0.49273,((((Vs1123-Mus_m2-149736546-igkv:0.04018,Vs507-Mus_m2-149736546-igkv:0.04814)1.000:0.24348,Vs504-Mus_m2-149736546-igkv:0.18891)0.709:0.02102,Vs499-Mus_m2-149736546-igkv:0.13720)0.956:0.07814,(Vs639-Homo_sapiens-ABBA01155544.1-igkv:0.01755,((Vs496-Mus_m2-149736546-igkv:0.14405,Vs485-Mus_m2-149736546-igkv:0.10555)0.983:0.11813,(((Vs493-Mus_m2-149736546-igkv:0.11316,Vs484-Mus_m2-149736546-igkv:0.07647)0.961:0.12430,(Vs482-Mus_m2-149736546-igkv:0.19731,(Vs276-Mus_m2-98207768-igkv:0.08241,Vs501-Mus_m2-149736546-igkv:0.12442)0.963:0.09298)0.331:0.02371)0.945:0.11064,((Vs1131-Mus_m2-149736546-igkv:0.16978,Vs1125-Mus_m2-149736546-igkv:0.32020)0.903:0.08918,((Vs1133-Mus_m2-149736546-igkv:0.06024,(Vs1132-Mus_m2-149736546-igkv:0.02283,Vs505-Mus_m2-149736546-igkv:0.05341)0.640:0.00496)0.946:0.09865,((Vs1135-Mus_m2-149736546-igkv:0.03617,Vs488-Mus_m2-149736546-igkv:0.07296)0.957:0.11098,(Vs1134-Mus_m2-149736546-igkv:0.09278,Vs1141-Mus_m2-149736546-igkv:0.11656)0.752:0.05201)0.972:0.15534)0.886:0.06470)0.569:0.00523)0.871:0.05925)0.666:0.04427)0.917:0.07375)0.201:0.00055)0.453:0.02958)0.519:0.02198,Vs739-Homo_sapiens-ABBA01015164.1-igkv:0.06668)0.732:0.01043,((Vs740-Homo_sapiens-ABBA01015164.1-igkv:0.04276,(Vs21-Homo_sapiens-ABBA01001852.1-igkv:0.16607,Vs773-Homo_sapiens-ABBA01018824.1-igkv:0.05046)0.862:0.03537)0.838:0.00055,(Vs1201-Homo_sapiens-ABBA01093307.1-igkv:0.01049,(Vs49-Homo_sapiens-ABBA01006960.1-igkv:0.01015,Vs660-Homo_sapiens-ABBA01000472.1-igkv:0.09604)0.912:0.03105)0.247:0.01045)0.735:0.01020);
