# Supplementary material for: Iterative Variable Gene Discovery from Whole Genome Sequencing with a Bootstrapped Multiresolution Algorithm
Source: Comput Math Methods Med. 2019 Feb 11;2019:3780245. doi: 10.1155/2019/3780245 (PMC6388353; doi:10.1155/2019/3780245)
Supplement: Supplementary Materials — supp_materialsV2.pdf: this is an updated document, which includes new figures requested by the reviewer. sequences_alignments.zip: these are genome sequence files that are relevant for reproducing some of the results. [file 3780245.f1.zip › 3780245.f1/sequences_alignments/bstrp_iteration_0.fasta]

>V0RF-AHZZ01030316.1-trgv |(38846, 39143)|1.77544900682|(0.769,0.588,0.623)|1
SQKSSNLEGKTKSITGPTGSPAEITCDLPGVSTLYIHWYLHQEGKAPQRLLYYEPYYFTV
VLESGISPGKYDTASTRKSWNLRLQNLIENDSGIYYC
>V1RF-AHZZ01030316.1-trgv |(43861, 44177)|2.53814258019|(0.925,0.859,0.817)|1
SQKSSNLEGRTKSVTRPTGSSAEITCDLPEVSSFYIHWYLHQEGKAPQRLLYYDSSNSRV
VLESGISPGKYDTYGSTRRRNLRLILRNLIENDSGVYYCANWD
>V2RF-AHZZ01030317.1-trgv |(14561, 14883)|1.5031912996|(0.746,0.553,0.523)|1
CVYGAGHLEQPQISSTKMLSKTARLECVVSGVTISETSIYWYRERPGEVIQFLVCIFYDG
TVKKESSIPSGKFEVDRIPKTSTSTLTIHNVEKQDIATYYCALWD
>V3RF-AHZZ01035404.1-trav |(2190, 2491)|2.09340755752|(0.855,0.743,0.671)|1
SGMAQTVTQSQPEMSVREAETMTLSCTYDTSESNYYLFWYKQPPSRQMILIIRQEAYKQQ
NATENRFSVNFQKAAKSFSLKISDSQLGDAAMYFCAFM
>V4RF-AHZZ01035404.1-trav |(11684, 11986)|2.66253707334|(0.938,0.864,0.891)|1
SGMAQTVTQSQPEMSVQEAETVTLSCTYDTSDSDYYLFWYKQPPSRQMILIIRQEAYKQQ
NATENRFSVNFQKAAKSFSLKISDSQLGDAAMYFCAYRS
>V5RF-AHZZ01035404.1-trav |(35215, 35503)|2.45488723927|(0.807,0.781,0.916)|1
LSGELKVGQNPLFLSTQEGKNYTIYCNYSTASNRLYWYRQDPGKSLESLFVLLSNGAVKQ
EGRLMASLDTKARLSSLHITAALQDLSATYFCAV
>V6RF-AHZZ01035404.1-trav |(52269, 52555)|1.66477682259|(0.618,0.481,0.883)|1
VSAAKNEVEQSPQDLTAQEGEFITINCSYSIGINSLHWLQQHPGGGIVSLFMLSSEKKKN
GRLIATINIQERHSSLHIAASQPRDSAIYICAV
>V7RF-AHZZ01040804.1-igkv |(26742, 27054)|2.42561943575|(0.876,0.970,0.714)|1
CNGDIVLTQSPASLAVSPGQRATITCRASESVSLLGINFIHWYQQKPGQPPKLLIYQASN
KDTGVPARFSGSGSGTDFTLTINPVEADDAANYYCLQSKDLP
>V8RF-AHZZ01040804.1-igkv |(44403, 44694)|2.68775934009|(0.941,0.823,0.986)|1
IVLTQSPTSMAVSQGERVTISCTASSSVSTSYLHWYQQKPGFPPRLLVYRTSSLASGVPA
RFSGSGSGTSYTLTISSMEAEDAANYYCQQGNSIP
>V9RF-AHZZ01042100.1-igkv |(22346, 22662)|2.30735240245|(0.946,0.675,0.941)|1
TSGDILLTQTPLSLPVTPAEPASISCRSSQSLLHSNGNTYLHWYLQKPGQSPQLLIYEVS
NRASGVPERFSGSGSGTDFTLKISLVEAEDVGVYYCMQTTQWP
>V10RF-AHZZ01042101.1-igkv |(1294, 1609)|2.57585703964|(0.934,0.808,0.900)|1
SSGDIVMTQTPLSLPVTLGEPTSISCRSSQSLVYSDGKTYLHWYLQKPGQSLQLLMYLVS
KRASGVPDRFSGSGSGTDFTLKISRVEAEDVGVYYCMQTLRSP
>V11RF-AHZZ01042101.1-igkv |(23302, 23620)|2.29665264703|(0.965,0.687,0.919)|1
SSGDIVMTQTPLFLPVTLGEPASISCRSSQSLLDSEDGNTYLDWYLQKPGQSPQLLIYEV
SNRASGVPDRFSGSGSDTDFTLKISRVEAEDVGVYYCMQALEFP
>V12RF-AHZZ01064615.1-ighv |(3396, 3696)|2.87091054075|(0.945,0.967,0.962)|1
VQCEVQLVESGGGLVQPGGSLRLSCAASGFTFSSYAMQWVHQTPGKGLEWVSAIGPGGDT
YYADAVKGRFTISRDNAKNSLYLQMNSLRAEAVYYCAR
>V13RF-AHZZ01064617.1-ighv |(710, 1019)|2.61646856117|(0.844,0.866,0.988)|1
AHSQEQLVQSGAEVKKPGASVKVSCKASEYTFTSYVISWLRQAPGQGFEWMGGINPSDGS
TSYAQKFQDRVTITADMSTSTVYMELSSLRSEDTAVYYCAR
>V14RF-AHZZ01064625.1-ighv |(10295, 10604)|2.78934871351|(0.959,0.877,0.982)|1
VLSQVQLQESGPAVVKPSQTLSLTCAVSGGSISSGYDWSWIRQSPGKALEWIGYISYSGS
TNYNPSLKSRVTISRDTSKNQFSLKLSSVTAADTAVYYCAR
>V15RF-AHZZ01064628.1-ighv |(242, 554)|2.70908799466|(0.938,0.838,0.979)|1
VLSQVKLQQWGEGLVKLSETLSLTCAVYGGSISGYYYWSWIRQAPGKGLEWIGSIYSSGS
STYYNPSLKSRVTISTDTSKNQFSLKLSSVTAADSAVYYCAR
>V16RF-AHZZ01064636.1-ighv |(1268, 1580)|2.64639750637|(0.870,0.903,0.878)|1
VLSQVKLQQWGEGLVKPSETLSLTCAVYGGSISGYYYWSWIRQPPGKGLEWIGNIDGNSA
STNYNPSLKNRVTISKDTSKNQFSLKLSSVTAADSAVYYCAR
>V17RF-AHZZ01069449.1-ighv |(25634, 25949)|2.96180866856|(0.981,0.998,0.984)|1
VQCEVQLVESGGGLVQPGGSLRLSCAASGFTFSNYWMNWVRQAPGKGLEWVGFIKNKADG
GTAAYAESVKGRFTISRDDSKNTLYLQMNSLKTEDTAVYYCTR
>V18RF-AHZZ01069451.1-ighv |(7153, 7468)|2.90561393505|(0.990,0.987,0.939)|1
VQCEVQLVESGGGLVQPGRSLRLSCAASGFTFSNYYMHWVRQAQGKGLEWVGLIRNKANS
YTTEYAAAVKGRFTISRDDSKNTLYLQMSSLKTEDTAVYYCTT
>V19RF-AHZZ01069453.1-ighv |(7538, 7844)|1.90758957063|(0.798,0.821,0.534)|1
SDQDVSLFAGVQCEVQLVESGGGLVQPGRSLRLSCAASGFTFSSYGMHWVRQAPEKGLEW
VSYIGSSTMYYADSVKGRFTISRDNAKNSLYLQINSLRAE
>V20RF-AHZZ01069453.1-ighv |(22421, 22735)|2.54470178706|(0.969,0.781,0.932)|1
VFSQVTLKESGPALVKPTQTLTLTCTFSGFSLSTSGMRVSWIRQPPGKALEWLARIDWDD
DKYYSTSLKSRLTISKDTSKNQVVLTMTNMDPVDTATYYCARR
>V21RF-AHZZ01069455.1-ighv |(6977, 7286)|2.8110210763|(0.916,0.925,0.995)|1
VQCEVQLVESGGGLVQPGGSLRLSCAASGFTFSSYYMYWIRQAPGKGLQWVSAINTGGGS
TWYTDSVKGRFTISRENAKNTLYLQMNSLRAEDTAVYYCAK
>V22RF-AHZZ01069455.1-ighv |(20090, 20405)|2.57345585936|(0.932,0.791,0.927)|1
VQCEMQLVESGGGLAQPGGSLRLSCAASGFTFSDHYMHWVRQAPGKGPEWVGFIRNKAKG
GTAEYAASVKGRFTISRDDSKNVTYLQMNSLKTEDTAVYYCAR
>V23RF-AHZZ01069455.1-ighv |(33477, 33791)|2.55316416017|(0.982,0.847,0.856)|1
VLSQVTLKESGPALVKPTQTLTLTCTFSGFSLSTSGMCVSWIRQPPGKALEWLARIDWDN
DKYYSTSLKSRLTISKDTSKNQVVLTMTNMDPVDTATYYCARV
>V24RF-AHZZ01069455.1-ighv |(52071, 52380)|2.14400476664|(0.957,0.991,0.600)|1
VLSQVQLQESGPGLVKPSETLSLTCAVSGGSISSYWWGWIRQPPGKGLEWIGHIYGSSGS
NYLNPSLKSRVTISIDTSKNQLSLKLSSVTAADTAVYYCAR
>V25RF-AHZZ01069456.1-ighv |(9988, 10297)|2.95753206285|(0.987,0.993,0.978)|1
VQCEVQLVESGGGLVQPGGSLRLSCAASGFTFSSYGMHWARQAPGKGLEWVSAINTGGGS
TWYADSVKGRFTISRENAKNTLYLQMNSLRAEDTAVYYCAK
>V26RF-AHZZ01091080.1-iglv |(12156, 12476)|2.14644622048|(0.871,0.676,0.776)|1
SLSQPVLTQSPSASASLGASVKLTCTLSSGHSSYTIAWHQQQQGKAPRYLMWLKSDGSHS
KADGIPDRFSGSSSGAERYLTISNLQSEDEADYYCQTWTTDIHTV
>V27RF-AHZZ01091598.1-ighv |(21923, 22232)|2.66944348535|(0.935,0.922,0.845)|1
AHAQVQLVQSGAQIKQPGASVKLSCKASGYTFTSYYMHWVRQAPGQGLEWIGLISPYNGN
KGYAQNFQGRVTITTDTSTSTGYMELSSLRSEDTAVYYCTR
>V28RF-AHZZ01091599.1-ighv |(2219, 2528)|2.9489815877|(0.988,0.967,0.996)|1
VQCEVQLVESGGGLSKPGGSLRLSCAASGFTFSDYNMDWVRQASGKGLEWVSSINTGGGS
TWYADSVKGRFTISRENAKNTLYLQMNSLRAEDTAVYYCAR
>V29RF-AHZZ01091599.1-ighv |(13841, 14150)|2.65527943361|(0.900,0.999,0.820)|1
VQCEVQLVESGGGLVQPGGSLRLSCAASGFTFSDNYMEWVRQAPGKGLQWVGQINPNGGT
TFLMDSVKGRFTISRDNAKNTLYLQTSSLNTEDTAVYYCTR
>V30RF-AHZZ01091600.1-ighv |(4723, 5037)|2.3447022116|(0.926,0.794,0.777)|1
VLSQVTLKESGPALVKPTQTLTLTCTFSGFSLTTSGMGVGWIRQPPGKALEWLAHIYWDD
DKRYSPSLKSRLTISKDTSKNQVVLTMTNMDPVDTATYYCARR
>V31RF-AHZZ01091603.1-ighv |(4407, 4716)|2.90443530231|(0.954,0.961,0.997)|1
VLSQVQLQESGPGLVKPSETLSLTCAVSGGSISSNYWNWIRQPPGKGLEWIGRIYGGSGS
TDYSPSLKSRVTISTDTSKNQLSLKLSSVTAADTAMYYCAR
>V32RF-AHZZ01097944.1-iglv |(5376, 5682)|2.71796429359|(0.882,0.959,0.902)|1
DSETVVTQEPSLSVSSGGTVTLTCGLSSGSVSTSNYPSWYQQTPGQAPRTLIYRTNTRPS
GVPDRFSGSILGNKAALTITGAQADDESDYYCMLYMGSGI
>V33RF-AHZZ01097949.1-iglv |(49069, 49372)|2.20407701393|(0.818,0.636,0.902)|1
VQAGLTQPPSVSKGLRQTATLTCTGNSNNVGNQGAAWLQQHQGHPPKLLSYRNNNRPSGI
SERFSASRSGNTASLTITGLQPEDEADYYCSAWDSSLSA
>V34RF-AHZZ01097949.1-iglv |(59447, 59759)|2.8042588236|(0.964,0.880,0.991)|1
SWAEVVFTQPHSVSGSPGQTVTISCTRSSGSIDSKYVQWYQQRPGSAPTTVIYEDNKRPS
GVPDRFSGSIDSSSNSASLTISGLNSEDEADYYCQSADGSYN
>V35RF-AHZZ01098200.1-trav |(876, 1169)|2.7261499321|(0.907,0.886,0.939)|1
VWSQQKEVEQNPGPLSVPEGATASLNCTYSNSAFQNFMWYRQYSRKGPQLLIYTYSSGNK
EEGRFTAQVDKSSKYISLFIRDSQPSDSATYFCAMS
>V36RF-AHZZ01098200.1-trav |(13940, 14240)|1.84645828565|(0.904,0.728,0.615)|1
GTRAQSVTQLDSQVPVFEEAPVLLRCNYSSSSVSVYLFWYVQYPNQGLQLLLKYLSGPTL
VKGINGFEAEFKKSETSFHLRKPSTHISDTAEYFCAVS
>V37RF-AHZZ01098200.1-trav |(35496, 35783)|2.75704239695|(0.922,0.938,0.900)|1
VNSQQGEEDPQTLSIQEGENATMNCSYKTSINNLQWYRQDSGRSLVQLILICSNEREKNS
GRLRVTLDTSKKSSSLLITASRAADTASYFCATD
>V38RF-AHZZ01098200.1-trav |(47327, 47634)|2.55423124233|(0.822,0.857,0.912)|1
LVTQTEGPVTLPERAALTLNCTYQTSYSAFIFWYVQYPNKEPELLLKSSENQETNSRGFQ
ASHDKSDSSFHLEKPSVQLSDSAVYYCVLRDTVGGTAARA
>V39RF-AHZZ01098200.1-trav |(50539, 50842)|2.41796800026|(0.806,0.808,0.804)|1
SSMAQKVTQAQTEISVVEKEDVTLDCVYETRENTYYLFWYKQPPSGELVFLIRRNSFDEQ
NEMNGRYDSNFQKSTSSFNLTITASQVVDSAVYFCALNE
>V40RF-AHZZ01098200.1-trav |(85982, 86269)|2.30195456152|(0.892,0.800,0.736)|1
LSGEDQVMQSPEALSLQEGESSSLNCSYTVSGLRGLFWYRQDPGKGPEFLFSLYSAGEEK
EKERLKATLTKKESFLHITGPKPEDSATYLCAVQ
>V41RF-AHZZ01098206.1-trav |(7994, 8291)|2.04536032245|(0.770,0.578,0.913)|1
VRGIQVEQSPPDLILQEGANSTLRCNFSATVNNLQWFHQNPWGQLINLFYIASGTKQNGR
LSATTVTTERYSLLHISSSQTTDSGIYFCAVKSQCSP
>V42RF-AHZZ01098206.1-trav |(24647, 24959)|1.7204889689|(0.836,0.515,0.742)|1
VSGQQKEKSDRQQVKQSPQSLIVQKGGISIINCAYENSAFDYFPWYRQFPGKGPALLIAI
RSVESEKEEGRFKIFFNKNAKNFSLHIMDSQPGDSATYFCAA
>V43RF-AHZZ01098942.1-ighv |(3874, 4183)|2.91270067828|(0.979,0.962,0.973)|1
VLSQVQLQESGPGLVKPSETLSLTCAVSGGSFSSNYWSWICQPPGKGLEWIGGIYGSGGS
TYYNPSLKNRVTISTDTSKNQFSLKLSSVTAADTAVYYCAR
>V44RF-AHZZ01098950.1-ighv |(183, 495)|2.96838527945|(0.996,0.976,0.998)|1
VLSQVQLQESGPGLVKPSETLSLTCAVSGYSISSGYYWGWIRQPPGKGLEWIGYIYGNSA
STYYNPSLKSRVTISKDTSKNQFSLKLSSVTAADTAVYYCAR
>V45RF-AHZZ01099970.1-iglv |(6343, 6653)|2.74896429359|(0.957,0.880,0.937)|1
SWAEVVFTQPHSVSGSPGQTVTISCTRSSGSIDSKYVQWYQQRPGSAPTTVIYNDDQRPS
GVPDRFSGSIDSSSNSASLTISGLKSEDEADYYCQSADSSS
>V46RF-AHZZ01099973.1-iglv |(28289, 28608)|2.07251918857|(0.793,0.647,0.730)|1
SPGASASLTCTFSGGINVGDYTIHWYQQKPGSPPRYLLKYKSDSDKHQGSGVPSRFSGSK
DASANTGILRISGLQSEDEADYYCAIGRSSGPHSDTHRWGSGTK
>V47RF-AHZZ01099973.1-iglv |(33051, 33358)|2.01146837441|(0.968,0.876,0.607)|1
SWAQSVLTQPPSVSAAPGQRVTISCSGSSSNIGRYYVSWYQQLPGAAPKLLIYDVNKRPS
GVPDRFSGSQSGTSTTLGITGLRPEDEADYYCLAWDNSLS
>V48RF-AHZZ01099973.1-iglv |(38400, 38710)|2.8863868029|(0.988,0.947,0.961)|1
SWAQSVLTQPPSVSGAPGQRVTISCTGSSSNIGAGYYVSWYQQLPGTAPKLLIYENNKRP
SGVSDRFSGSKSGTSASLAITGLQAEDEADYYCQSYDSSLS
>V49RF-AHZZ01100290.1-ighv |(204, 517)|2.80947879517|(0.955,0.897,0.972)|1
VQCEVQLVESGGGLVQPGRFLRLSCAASGFTFSNYYMHWAHQAQGRGLEWVSLMRKKANS
YTTEYAVSVKDRFTISRDDSKNTLYLQMNSLKTEDTAVYYCA
>V50RF-AHZZ01104241.1-igkv |(8110, 8412)|2.33692851886|(0.921,0.839,0.734)|1
STGDVVMTQSPLSLPVTPGEPASISCRSSQSLLHSSGNTYLSWFQQKPGQSARRLIYKVS
NRDSGVPDRFTGSGAGTDFTLKISRVEAEDVGVYYCMEG
>V51RF-AHZZ01104241.1-igkv |(24888, 25186)|2.62885132365|(0.964,0.788,0.998)|1
SKGEIVLTQSPAFRSVTLKEKVTITCQASQSIGSSLHWYQQKPDRSPKLLIKYASQSISG
VPSRFSGSGSGTDFTLTINSLEAEDAATYYCQQSSSL
>V52RF-AHZZ01104241.1-igkv |(53164, 53464)|2.73157726394|(0.987,0.864,0.946)|1
TSGEIVLTQSPATLSLSPGERATLSCRASQSVGSSLAWYQQKPGQAPRLLIYGASSRATG
IPDRFSGSGSGTEFTLTISSLEPEDFVVYYCQKYSSSP
>V53RF-AHZZ01104241.1-igkv |(58624, 58924)|2.90723355494|(0.977,0.956,0.976)|1
VRCDIQMTQSPSFLSASVGDRVTITCQASQSISNDLAWYQQKPGKSPTLLIYDATNLHTG
VPSRFSGSGSGADYSLTISSLELEDFAAYYCQQEYSYP
>V54RF-AHZZ01104243.1-igkv |(11240, 11555)|1.6336393095|(0.528,0.567,0.546)|1
SIGDIELTQTLHSLPVNPGEPASISCQSSQSLLHSDGKTYFYWFLRKPGQHPRLPIYWVS
NWNTGAPDRFSGSGAGTDFTLKISVVEAEDVGVYYYTQVTHWP
>V55RF-AHZZ01104243.1-igkv |(37856, 38148)|2.80824910116|(0.961,0.885,0.988)|1
SRGDIVMTQSPAFVSVTPGEKVTITCQASEGISNYLHWYQQKPDQAPKLFIQYASQSISG
VPSRFTGSGSGTDFTFTISSLEVEDAATYYCQQGN
>V56RF-AHZZ01104243.1-igkv |(54085, 54379)|2.87352554026|(0.988,0.935,0.964)|1
RGDIQMTQSPSSLSASVGDRVTITCRASQSFSSLAWYQQKPGKAPKLLIYSASSLQSGVP
SRFSGSKSGTDFTLTISSLQPEDVASYYCQQYYSYP
>V57RF-AHZZ01104243.1-igkv |(69226, 69518)|2.97456408064|(0.996,0.993,0.986)|1
AKCDIQMTQSPSSLSASVGDRVTITCRASQTISSYLAWYQQKPGKVPKLLIYAASSLESG
VPSRFSGSGSGTEFTLTISSLQPEDFATYYCQQHN
>V58RF-AHZZ01104760.1-ighv |(306, 615)|2.57234216659|(0.990,0.788,0.951)|1
VQGEVQLVESGGGLAKPGGSLRLSCAASGFTFSDHYMHWVRQAPGKGLEWISAINSGGGS
TYYAESVKGRFTISRENAKNTLYLQMDSLRAEDTAVYYCAR
>V59RF-AHZZ01104761.1-ighv |(4083, 4398)|2.85972492248|(0.947,0.941,0.975)|1
VKCEAQLMESGGGLVQPGGSLRLSCAASGFTFSDHYMQWVRQAPGKGLEWVGLIRNKADG
ETTDYAASVKGRVTTSRDDSKSITYLQMNNLKTEDTAVYYCAR
>V60RF-AHZZ01104763.1-ighv |(4374, 4683)|2.96208440501|(0.992,0.977,0.994)|1
VQCEVQLVESGGGLAKPGGSLRLSCAASGFTFSDYYMDWVRQAPGKALEWVSGISNTGGS
TWYADSVKGRFTISRENAKNTLYLQMSSLRAEDTAVYYCAR
>V61RF-AHZZ01105091.1-igkv |(457, 757)|2.81631623381|(0.957,0.992,0.890)|1
ARCDIQMNQSPSSLSASVGDTATITCRASQGISNNLAWYQQKPGKAPKLLIYAASSLESG
VPSRFSGSGSGTEFTLTISSLQPEDFAAYYCQQYNSLP
>V62RF-AHZZ01107544.1-trav |(5301, 5591)|2.77953496597|(0.941,0.940,0.904)|1
VNGENVEQHPSTLSVQEGDSSVIKCTYSDSASNYFPWYKQELGKGPQFIIDIRSNEHEKK
DQRITVLLNKTAKHFSLHITETQPGDSAVYFCAAS
>V63RF-AHZZ01107544.1-trav |(27803, 28091)|2.72912931549|(0.892,0.886,0.986)|1
VWSQQKVEQSSGPLSVPEGAIASLNCTYSDSGSQSFFWYRQYSGQSPELLMSTYSSGDKE
DGRFTAQLNRASQYVSLLIRDSQLSDSATYLCAV
>V64RF-AHZZ01107544.1-trav |(34317, 34614)|2.09155965152|(0.938,0.744,0.721)|1
GTRAQSVTQLDSQVSVSEGVPVLLRCNYSSSFSPTLFWYVQYPNQGLQLLLKYISGTTLV
KGINGFEAEFKKSETSFHLTKASAHVSDAAEYFCAVN
>V65RF-AHZZ01107544.1-trav |(53747, 54040)|2.47997474155|(0.934,0.895,0.765)|1
VSRGESVGLHLPTVSVQEGDNSVINCTYSDSASDYFLWYKQESGKGPQSIIDIRSNMAKR
QGQRLTVLLNKTMKHLSLQIAATEPGDSAVYFCAEN
>V66RF-AHZZ01107545.1-trav |(4983, 5284)|2.52348487201|(0.909,0.805,0.861)|1
SGIAQKITQTQPAMFVQEKEAVTLDCTYDTSDQNYGLFWYKQPSSGEMIFLILQMSYDKQ
NATEGHYSLNFQKARKSVNLVISASQVGDSATYFCAMR
>V67RF-AHZZ01107545.1-trav |(23299, 23593)|2.71167100508|(0.929,0.881,0.912)|1
RTRGDSVTQMEGPVTLSERAFLTINCTYTATGYPSLFWYVQYPGEGPQLLLKATKTDEKG
SNKGFEATYRKETTSFHLKKDSVQESDSAVYFCALS
>V68RF-AHZZ01108247.1-ighv |(744, 1053)|2.69801012694|(0.962,0.866,0.915)|1
AHSEVQLVQSGSEVKKPGATVKISCKASGYTFIDYYLHWVRQAPGKGLEWMGGVDPEDGE
ADYAQKFQGRVTITADTSTDTAYMELSSLRSEDTAVYYCAR
>V69RF-AHZZ01109397.1-igkv |(45, 345)|2.9898400105|(0.998,1.000,0.992)|1
ARCDIQMTQSPSSLSASVGDRVTITCRASQGISSYLNWYQQKPGKAPKLLIYDATTLQSG
VPSRFSGSGSGTEFTLTISSLQPEDFAVYYCQQRNSYP
>V70RF-AHZZ01109397.1-igkv |(13746, 14056)|2.15246921968|(0.898,0.988,0.599)|1
ARCDIQMTQSPSSLSASVGDTVTITCRASQGISSYLNWFQQKPGKAPKLLIYDATTLQSG
VPSRFRGSGSRTEFTLTISSLQPEDFAAYYCLQHNSYPPTV
>V71RF-AHZZ01109397.1-igkv |(20176, 20476)|2.89266172079|(0.968,0.980,0.947)|1
ARCDIQMTQSPSSLSASVGDRVTITCQASQGISSWLSWYQQKPGKAPKLLLYKASGLQSG
VPSRFSGSGSGTEFTLTISSLQPEDFATYYCQQFSSAL
>V72RF-AHZZ01109398.1-igkv |(3225, 3525)|2.77535180947|(0.975,0.872,0.970)|1
TTGEIVMTQSPATLSLSPGERATLSCRASQSVSSRLAWYQQKPGQAPRLLIYDASSRATG
IPDRFSGSGSGTEFTLTISSLEPEDVGVYYCQQSYSWP
>V73RF-AHZZ01110760.1-ighv |(1676, 1985)|2.73330465327|(0.890,0.957,0.905)|1
VLSQVQLQESGPGLVKPSETLSLTCAVSGASISSNWWSWIRQAPGKGLEWIGEINGNSGS
TNYNPSLKSRVTISKDASKSQFSLKLSSVTAADTAVYYCAR
>V74RF-AHZZ01111404.1-ighv |(10609, 10903)|2.2671366188|(0.946,0.876,0.692)|1
AQSQVQLVQSGAEVKKPGASVKVSCKASGYTFSTYAISWVRQAPGQGLEWMGGIIPLVGI
TNYAQKFQGRDTSTSTAYMELSSLRSEDTAVYYCAR
>V75RF-AHZZ01111405.1-ighv |(9460, 9769)|2.74480389142|(0.987,0.924,0.888)|1
AHSQVQLVQSGAEVKQPGSSVKVSCKASGYTFTNSAMQWVRQTPGQGLEWIGWIIIGNGN
TNYAQKFQGRVTITRDTSTSTGYMELSSLRSEDTAVYYCAA
>V76RF-AHZZ01113072.1-ighv |(329, 638)|2.11698614258|(0.987,0.955,0.611)|1
VQCEVQLVESGGGLVQPGVSLRLSCAASGFTFSSTRMNWIRQAPGKKLEWVADIKYDGSE
KYYVDSVKGRFTISRDNAKNSLSLQMNSLRAEDTAVYYCVR
>V77RF-AHZZ01117753.1-igkv |(3232, 3532)|2.82541085727|(0.996,1.000,0.881)|1
ARCDIQMTQSPSSLSASVGDRVTITCRASQGISTYLNWYQQKPGKAPKLLIYAASRLESG
VPPRFSGSGSGTEFTLTISSLQPEDFATYYCLQYKSDP
>V78RF-AHZZ01117754.1-igkv |(5922, 6221)|2.84011068476|(0.979,0.942,0.933)|1
TTGEIVMTQSPATLSLSPGERATLSCRASQSVSSYLAWYQQKPGQAPRLLIYGASSRATG
IPDRFSGSGSGTEFTLTISSLEPEDVGVYYCQQYNNWN
>V79RF-AHZZ01117754.1-igkv |(31214, 31502)|2.07376866993|(0.748,0.836,0.602)|1
IVMTQSPATLSLSPGEGATLSCRASQSVGSYLAWYQQKPGQAPKLLIHSAYFRATGIPDR
FSGSGSRTEFTLTISSLEPEDVGVYHCQQYNDLP
>V80RF-AHZZ01123648.1-ighv |(7375, 7669)|2.2671366188|(0.946,0.876,0.692)|1
AQSQVQLVQSGAEVKKPGASVKVSCKASGYTFSTYAISWVRQAPGQGLEWMGGIIPLVGI
TNYAQKFQGRDTSTSTAYMELSSLRSEDTAVYYCAR
>V81RF-AHZZ01124687.1-ighv |(302, 609)|2.7522783301|(0.976,0.962,0.864)|1
AHAQVQLVQSGPEVKQPGASVKVSCKASGYTFTSYGMNWVRQAHGQRLEWMGWINTDSGN
PTYAQGFKERFTFSMDTSISTAYLQISSLKAEDTAVYYCA
>V82RF-AHZZ01129142.1-ighv |(1012, 1321)|2.94232022844|(0.985,0.986,0.972)|1
VLSQVQLQESGPGVVKPSETLSLTCAVSGGSISSYWWGWIRQPPGKGLEWIGYIYGSGSS
TNYNPSLKSRVTISKDTSKNQFSLKLSSVTAADTAVYYCAR
>V83RF-AHZZ01130977.1-trav |(3875, 4175)|2.06596090293|(0.768,0.619,0.764)|1
FSVAQKVTQAQSSVSMPVGKAVTLNCQYETSWWSYYLLWYKQFPGKEMIFLIRQGSSEQN
ARNGRYSVNFQKAASSIALTISALQLEDSATYFCALWE
>V84RF-AHZZ01143621.1-igkv |(14221, 14507)|2.54942772917|(0.866,0.820,0.872)|1
IVMTQSPATLSLSPGERATLSCRASQSVSSRLAWYQQKPGEAPRLLIYDASSRATGIPAR
FSGSGSGTDFTLTISSLEPEDVAVYFCQQESNW
>V85RF-AHZZ01150255.1-ighv |(7064, 7379)|2.83295419885|(0.923,0.986,0.941)|1
VQCEVQLLEYGGGLVQPGRSLRLSCAVSGFTFSDHYMSWVRQAPGKGPEWVGFMRNKANG
GRTEYAASVKGRFTISRDDSKSTASLQMSSLKTEDTAVYYCAT
>V86RF-AHZZ01169213.1-igkv |(5365, 5663)|2.34371267642|(0.862,0.714,0.852)|1
TTGEIVMTQSPATLALSPGERATLSCRASQSVSSYLAWYQQKPGQAPRLLIYGASSRATG
IPDRFSGSGSGTEFTLTISSLEPEDVGVYFCLQSSNW
>V87RF-AHZZ01176978.1-igkv |(12153, 12453)|2.95243912445|(0.992,0.967,0.996)|1
ARCDIQMTQSPSSLSASVGDKVTITCHASQGISSWLSWYQQKPGKAPKLLIYKASSLQSG
VPSRFSGSGSGTDYTLTISSLQPEDFATYYCQQDSSSP
>V88RF-AHZZ01198213.1-trav |(10234, 10524)|2.64072634217|(0.869,0.864,0.917)|1
MSRGEDVEQSLFLSVREGDISVINCTYTDSSSTYLYWYKQEPGAGLQLLTYILSNMDLKR
DQRVTVLLNKKDKHLSLRIADTQTEDSAIYFCAES
>V89RF-AHZZ01198214.1-trav |(2660, 2948)|2.05872811927|(0.861,0.776,0.635)|1
VKSQKIEQNSEALNIQEGKTATLTCNYTNYSPSYLQWYRQDPGRGPVFLLLIRENEKEKW
KERLKVTFDTTLKQSLFHITASQPADSATYLCAL
>V90RF-AHZZ01198214.1-trav |(53657, 53950)|2.52353655292|(0.811,0.842,0.966)|1
GSGKNQVEQSPQSLIILEGKNCTLQCNYTVSPFSNLRWYKQDTGKGPISLTIMTFSENTK
SNGRYTATLDADTKQSSLHITAAQLSDSASYICVVS
>V91RF-AHZZ01198216.1-trav |(1076, 1382)|2.35696850246|(0.919,0.733,0.852)|1
VWSQQKEVEQDPGPFSVPEGATVTFNCTYSNSASQSFFWYRQDSRKEPKLLMSVYSSGNE
DGRFTAQLNRASQYISLLIRDSQLSDSATYLCAVYTQCSP
>V92RF-AHZZ01198216.1-trav |(6535, 6832)|2.3082983539|(0.960,0.767,0.808)|1
GTRAQSVTQLDSQVSVSEGVPVLLRCNYSSSVSPYLFWYVQYPNQGLQLLLKYTSGTTLV
KGINGFEAEFKKSETSFHLTKASAHVSDAAEYFCAVN
>V93RF-AHZZ01035404.1-trdv |(86530, 86836)|1.88854924263|(0.687,0.545,0.900)|-1
RGMLCDKVTQSSLDQMVASGSEVVLLCTYDSTYSDPGLFWYRIRPDYNFQFVFYGDKSRS
HGSYFAKGRFSVKHLLTQKAFHLVISPVSTEDSATYYCAM
>V94RF-AHZZ01040804.1-igkv |(3190, 3490)|2.58567605248|(0.865,0.856,0.865)|-1
TTGQVILTQSPATLSLSPGERATLSCRASQSVSNYLAWYQQKPGQAPRLLIHSASSRATG
IPDRFSGSGSGTEFTLTISSLEPEDVGVYHCYQYYSGY
>V95RF-AHZZ01040804.1-igkv |(12121, 12409)|2.09792520926|(0.666,0.758,0.892)|-1
TILTQSAAFVSATPGDKVTISCKASQDIDDDMNWYQLEPGEAPKLIIKDATTLVSGIPPR
FSGSGYGTDFTLTINNVESEDAAYYFCLQHDNFP
>V96RF-AHZZ01040807.1-igkv |(28694, 28982)|1.7939231153|(0.616,0.559,0.888)|-1
TILTQSPAFVSATPGDKVTISCRAGQDIDDDMNWYQQEPGEAPKLIIKDATTLVSGIPPQ
FSGSGYGIDFTLTINSMKSEDTAYYFCQQRDNTP
>V97RF-AHZZ01040807.1-igkv |(39921, 40221)|2.8282267266|(0.969,0.893,0.991)|-1
AKCDIQMTQSPTFLSASVGDRVTIACRASQSIHKGLAWYQQKPGKAPKLLISYASNLYTG
VPSRFSGSGSGTDFTLTISSLQPEDAATYYCFQYNSYP
>V98RF-AHZZ01040808.1-igkv |(17035, 17353)|2.85203899007|(0.977,0.903,0.995)|-1
ACGDIVMTQSPDSLAVSLGERVTINCKSSQSLLYSSNNKNYLAWYQQKPGQTPKLLISWA
STRESGVPNRFSGSGSGTDFTLTISGLQAEDVAVYYCQQHYSTP
>V99RF-AHZZ01042076.1-igkv |(7808, 8108)|2.65379027094|(0.995,0.982,0.808)|-1
TRCAIQMTQSPSSLSASVGDRVTITCRASQSIGSNLAWYQQKPGKVPKLLIYAASTLQSE
VPSRFSGSGSGTDFTLTISSLQPEDVATYYCQKCDSAP
>V100RF-AHZZ01042077.1-igkv |(2202, 2517)|2.47886409265|(0.983,0.741,0.965)|-1
SSGDIVMTQTPLSLPVTLGEPASISCRSSQSLLSSNEYNYLNWYLQKPGQSPQLLIYYGS
NRASGVPDRFSGSGSGTDFTLKISRVEAEDVGVYYCMQALQTP
>V101RF-AHZZ01042078.1-igkv |(13394, 13694)|2.90781063759|(0.952,0.976,0.987)|-1
ARCDIQMTQSPSSLSASVGDRVTITCRASQNIYSNLAWYQQKPGKAPKPLIYYASSLETG
VPSRFRGSGSGTDYTLTISSLQPEDIATYYCQQYNNSP
>V102RF-AHZZ01042078.1-igkv |(35394, 35709)|2.33938640574|(0.946,0.814,0.767)|-1
SSGDVVMTQSPLTLPVTPGQPASISCRSSQSLVHSDGNTYLSWYQQKPGQPPRLLIYKVS
NRYSGVPDRFSGSGAGTDFTLKISRVEAEDVGVYYCMQGTKVP
>V103RF-AHZZ01042078.1-igkv |(45757, 46072)|2.45530185005|(0.974,0.804,0.848)|-1
SSGDIVMTQTPLSLPVTPGEPASISCRSSQSLLHSDGYTYLDWYLQKPGQSPQLLIYGGS
NRASGVPDRFSGSGSGTDFTLKISKVEAEDVGVYYCMQHRALP
>V104RF-AHZZ01042079.1-igkv |(5782, 6096)|1.59335721837|(0.947,0.756,0.529)|-1
SSGDVVLTQTPLSLPVTPGEPASISCRSSQSLLHSNGNTYLDWYLQKPGQSPRLLIYKVT
NRESGVPDRFSGSGSGTDFTLKISRVEPEDVGVYYCMQGTKAP
>V105RF-AHZZ01042080.1-igkv |(4422, 4722)|2.87206085876|(0.992,0.916,0.987)|-1
ARCDIQLTQSPSSLSASVGDRVTISCRTSQNIYSNLAWYQQKPGKTPKLLIYAASSLQSG
IPSRFSGSGSGTDFTLTISSLQPEDVATYYCQHGYGTP
>V106RF-AHZZ01042080.1-igkv |(19769, 20084)|2.39907627458|(0.965,0.709,0.956)|-1
SSGDIVMTQTPLSLPVTPGEPASISCRSSQSLLHSNGNTYLYWYLQKPGQPPRLLIYRVS
NRFSGVPDRFSGSGSGTDFTLKISRVEAEDVGVYYCMQALQNP
>V107RF-AHZZ01042080.1-igkv |(24756, 25071)|2.40265294143|(0.974,0.780,0.849)|-1
SSGDIVMTQTPLSLPVTPGEPASISCRSSQSLLHSNGNTYLHWYLQKPGQSPKLLIYGGS
NRASGVPDRFSGSGSGTDFTLKISKVEVEDVGVYYCVQAIAFP
>V108RF-AHZZ01042083.1-igkv |(18979, 19279)|2.90125569424|(0.954,0.973,0.978)|-1
ARCDIHMTQSPSSLSASVGDRVTITCRASQGITDDLAWYQQKPGETPKLLIYEASSLQSG
IPSRFSGSGSGTEFTLTISSLQLNDSATYYCQHYYSYP
>V109RF-AHZZ01042083.1-igkv |(31507, 31813)|2.49211167889|(0.959,0.740,0.968)|-1
IMMTQTPLSLPITPGEPASISCRSSQSLLDSDDGYTYLDWYLQKPGQSPQPLIYFVSSWA
SGVPDRFSGSGSGTDFTLKISRVEAEDVGVYYCMQCIEFI
>V110RF-AHZZ01042084.1-igkv |(14291, 14602)|1.52031617586|(0.758,0.520,0.573)|-1
LASISCKSSQSLLGSDDKNIYLDWYLQKPGQSPQLLIYDVSSWASGVPDRFSGSGSGTDF
TLKISLVVAEEVGVYYCMQHTEFPSTVVHPGTESSLLGCPSC
>V111RF-AHZZ01042084.1-igkv |(28167, 28465)|2.89244672519|(0.999,0.943,0.967)|-1
ARCDIQLTQSPSSLSASVGDRVTITCQASQGISNNLAWYQQKPGKVPKLLIYKASTLQSG
VPSRFSGSGSGTDFTLTISSLQPEDFATYYCQYGYGI
>V112RF-AHZZ01042085.1-igkv |(3468, 3783)|2.58537442212|(0.986,0.817,0.912)|-1
TSGDIVMTQTPLSLPVSPGEPASISCRSSQSLLHSDGYTYLDWYLQKPGQSPQLLIYLVS
NRASGVPDRFSGSGSGTDFTLKISRVEAEDVGVYYCEQGTQLP
>V113RF-AHZZ01042085.1-igkv |(40087, 40402)|2.44207592007|(0.942,0.793,0.836)|-1
TSGDIVMTQTPLSLPVSPGEPASISCRSSQSLLHSGGKTYLYWYLQKPGQSPQLLIREVS
NRASGVPDRFSGSGSGTDFTLKISPVEAEDVGVYYCMQGIQLP
>V114RF-AHZZ01042085.1-igkv |(49587, 49887)|2.96969465218|(0.999,0.975,0.998)|-1
ARCDIQMTQSPSSLSASVGDRVTITCRASQGITNDLAWYQQKPGETPKLLIYEASSLQSG
IPSRFSGSGSGTDFTLTISSLQPEDFATYYCQHYYSTP
>V115RF-AHZZ01042091.1-igkv |(7298, 7613)|2.91203470796|(0.995,0.953,0.973)|-1
TSGDIVMTQTPLSLSVTPGEPASISCRSSQSLLHSNGNTYLHWYLQKPGQSPQLLIYLVS
NRASGVPDRFSGSGSGTDFTLKISRVEAEDVGVYYCMQGIQLP
>V116RF-AHZZ01042093.1-igkv |(2142, 2442)|2.37040785626|(0.905,0.688,0.962)|-1
ARCAIQMTQSPSSPSATVGDRVTTTCRVSQSINNNLAWYQQKPGKTPKLLICEASSLQSG
IPSRFSGSGSGTDFTLTISSLQSEDVATYFCQHGYSYP
>V117RF-AHZZ01042093.1-igkv |(34873, 35173)|2.82365734643|(0.976,0.887,0.993)|-1
ARCDIQMTQSPSSLSASVGDRVTITCRASQGINKELDWYQQKPGKAPTLLIYAASSLQTG
VSSRFSGSGSGTDFTLTISSLQPEDVATYYCQQDYTTP
>V118RF-AHZZ01042093.1-igkv |(53999, 54301)|2.65967622459|(0.956,0.813,0.970)|-1
SSGDIVMTQTPLSLPVTPGEPASISCRSSQSLLHSNGYTYLYWYLQKPGQSPQLLMYFAS
YRASGVPDRFSGSGSGTDFTLEISRVEAEDIGVYYCMQG
>V119RF-AHZZ01042093.1-igkv |(71557, 71872)|2.13650363518|(0.971,0.646,0.890)|-1
YSGDIVMTQTPLSLPVIPGEPASISCRSSQSLLDSDGYTCLDWYLQKPGQSPQLLIYEVS
NRASGVPDRFSGSGSVTDFTLKISRVEAEDVGVYYCMQSIEFP
>V120RF-AHZZ01042093.1-igkv |(93881, 94199)|2.05798911965|(0.814,0.725,0.651)|-1
SSGDIVMTQTPLSLLVTPGEPASVSSCRCSQSLPYRGEKTYLYWSLQKPGQSPQLLIYFV
SNRASRVPDRFSGSGSDTDFTLKISWVETEDVGIYYRMENIELP
>V121RF-AHZZ01042093.1-igkv |(102084, 102402)|2.66491526311|(0.979,0.842,0.927)|-1
SSGDIVMTQTPLSLPVTPGEPASISCRSSQSLLDSDDGNTYLDWYLQKPGQSPQLLIYEV
SNRASGVPDRFSGSGSDTDFTLKISRVEAEDVGVYYCMQSTEYP
>V122RF-AHZZ01042093.1-igkv |(120004, 120320)|2.35283678927|(0.905,0.702,0.898)|-1
TSGDILLTQTPLSLPVTPGEPASISCRSSQSLLHSNENTYLHWYLQKPGQSPQLLICEVS
NRASGVPDRFSGSGSDTDFTLKINLVEAEDVGVYYCMQTTQWP
>V123RF-AHZZ01042093.1-igkv |(124902, 125217)|2.61020531367|(0.941,0.808,0.930)|-1
SSGDIVMTQTPLSLPVTLGEPTSISCRSSQSLVYSDGKTYLHWYLQKPGQSPQLLMYLVS
NRASGVPDRFSGSGSGTDFTLKISRVEAEDVGVYYCMQTLRSP
>V124RF-AHZZ01042093.1-igkv |(128335, 128650)|2.37813045479|(0.903,0.726,0.871)|-1
SSGDIVMTQTPLSLPVIPGEPASISCRSSQSLLHSDGYTYLHWYLQKPGQSPQLLIYLGS
NCASVVPDRFSGSGSGTDFTLKISRVEAEDIGIYYRMQNLQIP
>V125RF-AHZZ01042093.1-igkv |(133001, 133301)|2.76923851257|(0.886,0.966,0.971)|-1
ARCDTQMTQSLSSLFASVGDRVTITCRASQGINNELAWYQQKPGKAPTLLLYSGSSLHTG
VPSQFSGSGSGTDFTLTISSLQPEDVATYYCRQDYTTP
>V126RF-AHZZ01042093.1-igkv |(141218, 141533)|2.18646303809|(0.973,0.668,0.886)|-1
SSGDIVMTQTPLSLPVTPGEPSSISCRSSQSLLDSYGYTNLNWYLQKPGQSPQLLIYEVS
NRASGVPDRFSGSGSGTDFTLKISKVEAEDVGVYYCMQTPQTP
>V127RF-AHZZ01042093.1-igkv |(150847, 151147)|2.96849264122|(0.999,0.988,0.983)|-1
ARCDIQMTQSPSSLSASVGDRVTITCQASQGISNNLNWYQQKPGKTPKLLIYAASSLQSG
IPSRFSGSGSGTDFTLTISSLQPEDFATYYCQQRYSAP
>V128RF-AHZZ01042093.1-igkv |(165765, 166067)|2.63957461953|(0.995,0.826,0.939)|-1
TSGDIVMTQTPLSLPVSPGEPASISCRSSQSLLHSNGNTYLHWYLQKPGQSPQLLIYEVS
NWASGVPDRFSGSGSGTDFTLKISRVEAEDVGVYYCEQG
>V129RF-AHZZ01042093.1-igkv |(173599, 173899)|2.91288121229|(0.950,0.992,0.982)|-1
ARCDIQMTQSPSALSASVGDRVTISCRASQNIYSGLAWYQQKPGKAPKLLIYDASGLQSG
IPSQFSGSGSGTDFTLTISSLQPEDSATYYCQHYYDTP
>V130RF-AHZZ01042094.1-igkv |(1120, 1438)|2.28791591287|(0.977,0.655,0.997)|-1
TSGDIVMTQTPLSLPVTPGEPASISCRSSQSLFNSDYANTYLDWYLQKPGQSPQLLIYML
SNRASGVPDRFSGSGSGTDFTLKISRVEAEDVGVYYCMQSIEYP
>V131RF-AHZZ01044061.1-trav |(5500, 5816)|2.37159486924|(0.847,0.731,0.846)|-1
QLVTQPEDQVTVAERNPLTVKCTYSVSGNPYLFWYVQYPNQGLQFLLKYITGDNLVKGSY
GFEAEFNKSQTSFHLKKPSALVSDSALYFCAVRDTLIGAAGGA
>V132RF-AHZZ01044067.1-trav |(5751, 6054)|1.9452273709|(0.836,0.733,0.607)|-1
MCLVLVTTGQNIDQPTEMTAMEGAIVQINCTYQTSGFNGLSWYQQHDGEAPTLLSYNVLD
GLEEKGRFSSFLSNSKRYSYLLLKELQVKDSASYLCAVR
>V133RF-AHZZ01044070.1-trav |(1428, 1737)|2.19082905034|(0.869,0.840,0.654)|-1
TIMYLAIGTAGQSLEQPSEVTAVEGAIVQINCTYQTSRFDGLSWYQQRDGGAPTFLSYNA
LDGLEERGHFSSFLSRSDSYGYLLLQELQMKDSASYFCAVR
>V134RF-AHZZ01067647.1-trbv |(19172, 19469)|2.27618398029|(0.824,0.843,0.685)|-1
PLEAQVTQNPRYLITVTGKKLTVTCSQNMNHDYMSWYRQDPGLGLRQIYYSSNVELVDKG
DIPEGYNVSRKEKRNFPLILESPSPSQTSLYFCASSL
>V135RF-AHZZ01067647.1-trbv |(24494, 24801)|2.66438502922|(0.895,0.867,0.906)|-1
LVDVKVTQSSRYLIKRTGEKVFLECVQDMDHERMFWYRQDPGLGLRLIYFSYDVKVNEKG
DIPEGYSVSREKKERFSLILGSASTNQTSMYLCASSLSTA
>V136RF-AHZZ01067647.1-trbv |(37999, 38302)|2.32777872011|(0.787,0.712,0.907)|-1
SVFSAVVSQKPSRDVCQRGTSVTIQCQVDSQLTMMFWYRQQPGLSMTLIATANQGSEATY
ESGFVIDKFPISRPNLTFSTLTVSNTNPEDSSIYLCSVE
>V137RF-AHZZ01067648.1-trbv |(3732, 4029)|2.55937208453|(0.868,0.939,0.794)|-1
LMEADIYQNPRHRVIGTGKKITLECSQTMGHDKMYWYQQDPGMELHLIHYSYGVNSTERG
DFSSESTVSRIRIEHFPLTLESTSPSHTSQYLCASSE
>V138RF-AHZZ01067649.1-trbv |(1785, 2085)|2.62021049144|(0.887,0.857,0.880)|-1
HAEAGVSQDPRHKITKTGQNVSFKCVPISEHNRLYWYRQTLGQGPEFLTYFQNEAQQDRS
GLFSDRFSAERPEGSISTLMIQHTEQGDSAVYLCASSL
>V139RF-AHZZ01067649.1-trbv |(8252, 8549)|2.08445780107|(0.885,0.580,0.944)|-1
SVAAGVTQSPRHLIKEKRETATLQCYPIPEHDTVYWYQQGPGQGPQFLISFYEKMQRDKG
SIPDRFSAQQFSDYHSEVNMSSLELGDSAVYLCASSL
>V140RF-AHZZ01067649.1-trbv |(16676, 16973)|2.71750416562|(0.923,0.938,0.869)|-1
HMDAGITQSPRHKITETGTPVTLRCHQTENHRYMYWYRQDLGNGLRLIHYSYGVEDTDKV
EISDGYSVSRSKTEDFLLTLESATRSQTSVYFCASSE
>V141RF-AHZZ01067649.1-trbv |(28027, 28318)|2.33209171198|(0.925,0.689,0.918)|-1
AGVTQSPRYKITEKKQPVAFWCNPISGHNTLYWYRQNLGQGPELLIRYENEEAVDDSRFP
KDRFSAERLKGVDSTLKIQPAELGDSAVYLCASSL
>V142RF-AHZZ01067649.1-trbv |(33773, 34073)|2.19284418174|(0.828,0.777,0.681)|-1
HTDAGVIQSPRHEVTEMGKEVTLRCEPISGHSSLFWYRQSMMRGLEFLIYFNNKSPIDDS
GMPKDRFSATMPNASFSTLKIQPSEPRDSAMYFCASSL
>V143RF-AHZZ01067649.1-trbv |(37056, 37356)|2.42314567491|(0.922,0.895,0.737)|-1
HTDAGVIQSPRHEVTEMGKEVTLRCEPISGHTYLFWYRQSMMQGLEFLIYFNDKSPIDDS
GMPKDRFSATMPNASFSTLKIQPSEPRDSAVYFCASSL
>V144RF-AHZZ01067649.1-trbv |(52456, 52756)|2.14719420427|(0.827,0.958,0.606)|-1
LIDAGVTQTPRHKVTEMGQEVTMRCQPILGHNTVFWYRQTVMQGLELLVYLRNKASLDDS
GMPKDRFSAEMPDASLATLKIQPSEPRDSAVYLCASGL
>V145RF-AHZZ01067649.1-trbv |(59413, 59701)|2.64716065559|(0.935,0.888,0.857)|-1
GVTQFPSHRVIEKGQTVTLRCDPISGHDYLYWYRRVMGKEIKFLIYFMRASVQDESGMPN
KRFSAERTGGTYSTLKVQPAELEDSGVYFCASSQ
>V146RF-AHZZ01067649.1-trbv |(64509, 64806)|1.73641231208|(0.874,0.688,0.586)|-1
HGDVMVIQNPRYQVTQLEKPVTLSCSQNLNHKVMYWYQQKPSQAPKLLFHYYDKDFNNEA
DTPDNFQSRRPNTSFCFLDIRSPGLEDAAVYLCASSK
>V147RF-AHZZ01067649.1-trbv |(69483, 69783)|2.43495558209|(0.869,0.820,0.784)|-1
SPGEEVTQTPKHLVKGEGQKAKLYCDPIKGHSYVFWYQQVLRKEFKFLISFQNKNVFDET
GMPKERFSAKCPANSPCSLEIQATKLKDSAVYFCASSQ
>V148RF-AHZZ01067649.1-trbv |(89894, 90191)|2.53316860054|(0.895,0.951,0.765)|-1
TVDGGITQSPKYLFRKEGQNVTLSCEQNLNHDAMYWYRQDPGQGLRLIYYSQIVNDIQNG
DIAEGYSVSRDRKESFPLTVTSAQRNPTAFYLCASSI
>V149RF-AHZZ01067649.1-trbv |(108243, 108543)|2.36730498829|(0.906,0.700,0.918)|-1
SADTKVTQRPRLLVKANEQKAKMDCVPVKGHSYVYWYRKKLDEELKFLVYFQNEEIIQKA
EIINERFSAQCPQNSPCTLEIQSTESGDAALYFCASSK
>V150RF-AHZZ01067649.1-trbv |(117153, 117458)|2.17524260985|(0.871,0.774,0.690)|-1
SFHAEVTQTPGYLVKGKGQKTKIDCTPEKGHTYVYWYQQNQNKEFTFLISFQDEQVLQET
ELHKKRFSSQCPKNLPCSLEIPSSEPGDTALYLCASSQST
>V151RF-AHZZ01067649.1-trbv |(129327, 129625)|2.70978689957|(0.888,0.912,0.915)|-1
SMDADVTQTPRNSIAKTGKRIMLECSQTKGHDQMYWYRQDPGLGLRLIFYSFDVEDINKG
EISDGYSASRQEQAKFSLSLESATPNQTALYFCATSD
>V152RF-AHZZ01067651.1-trbv |(1632, 1932)|2.80193478495|(0.919,0.941,0.947)|-1
HTGAGVSQSPRYKVTKRGQDVALRCDPISGHDYLYWYQQALGQGPELLTYFNYEAQQDKS
GLPNDRFSADRPEGSVSTLKIQRTEQRDSAVYLCASSL
>V153RF-AHZZ01067651.1-trbv |(6692, 6982)|2.36978945213|(0.918,0.813,0.768)|-1
DAGVTQSPTHLIKMRGQQVTLRCSPISGHTSVSWYQQALGQGPQLIFEYDRKEERVRGNF
LDRFSGRQFPNYSSELNVNASEMGDSALYLCASSL
>V154RF-AHZZ01067651.1-trbv |(13303, 13600)|2.76451845765|(0.946,0.911,0.916)|-1
PGNAGVTQTPKFQILKTGQSMTLQCAQDMNHNYMSWYRQDPGVGLRLIHYSVGAGVTDKG
EVSNGYNVSRLNTEDFPLSLESAASSQTSVYFCASSY
>V155RF-AHZZ01067651.1-trbv |(19186, 19486)|2.02921442989|(0.876,0.559,0.943)|-1
HTGAGVSQFPRYRVTKRGQDVTLRCDPISGHEYLSWYQQAPGQGPEFLTYFQNDAQLDKS
GLPSDRFSAARPEGSVSTLKIQRTEQGDSAVYLCASSL
>V156RF-AHZZ01067651.1-trbv |(27974, 28270)|2.35930416584|(0.918,0.726,0.864)|-1
PVEPGVTQSPTHLIKTRGQQVILRCSPISGHSSVYWYQQALGQGPQFIFEYCQKEERGRG
NFPDRFSGRQFPNYSSELNVSALLLGDSALYLCASSL
>V157RF-AHZZ01067651.1-trbv |(47891, 48187)|2.79407773254|(0.972,0.885,0.967)|-1
PVDAGVTQSPTHLIKTRGQQVTLRCSPISGHTSVYWYQQALGQGPQFIFQYYEKEERERG
NFPDRFSGRQFPNYSSELNVSALLLGDSALYLCASSL
>V158RF-AHZZ01067651.1-trbv |(55192, 55483)|2.46999264052|(0.905,0.918,0.745)|-1
NADVTQTPKFRVLKTGQSMIVQCAQDMKHDYMFWYRQDPGMGLRLIYYSVTAGITTKGEV
PNGYNVSRINTEDFLLRLESAALSQTSVYFCASSY
>V159RF-AHZZ01067651.1-trbv |(59487, 59787)|2.79431523225|(0.909,0.931,0.972)|-1
HTGAGVSQSPRYKVIKKGQDVALRCDPISGHAALYWYQQALGQGPEFLTYFNYQAQPDKS
GLPNDRFSAERSEGSVSTLTIQRTEQQDSAVYLCASSL
>V160RF-AHZZ01067651.1-trbv |(68255, 68551)|2.05428596058|(0.904,0.762,0.667)|-1
PVIAGVAQSPTHLIKTRGQQVTLRCSPISGHNTVYWYQQALGQGPQLIFQYYRGEDRGRG
NFPERFSGHQFPNYSSELNVSALLLGDSALYLCASSL
>V161RF-AHZZ01067652.1-trbv |(695, 992)|2.82256213308|(0.981,0.961,0.905)|-1
PVNAGVTQTPKFQVLKTGQSMTLQCAQDMNHDCMYWYRQDPGMGLRLIHYSVGEGSTDKG
EVPDGYNVTRSNTEDFPLRLESAAPSQTSVYFCASSY
>V162RF-AHZZ01067652.1-trbv |(5225, 5525)|2.72636857198|(0.928,0.862,0.957)|-1
HTGAGVSQSPRYKVTKRGQDVALRCDPISGHDYLYWYQQAPGQGPEFLTYFQNDAQRDKS
GLPNDRFSAERTEGSVSTLKIQRTEQADSAVYLCASSL
>V163RF-AHZZ01067652.1-trbv |(13142, 13432)|1.98671580205|(0.866,0.741,0.634)|-1
DAGVTQSPTHLIKTRGQQVTLRCSPISGHTSVSWYQQALGQGLQFILWYDEEEERGRGTF
PHRFSGHQFPNYSSELNVNASEVGDSALYLCASSL
>V164RF-AHZZ01067652.1-trbv |(18426, 18743)|2.32813166981|(0.888,0.863,0.705)|-1
LVNAGVTQTPKFQVLKTGQSMTLQCAQDMSHNWYRQHPGMGLRLIRYSAAADVTDKGEVP
SGYNVSRLNTEDFPLRLESAASSQTSVYFCASSYSPTLQGHLLS
>V165RF-AHZZ01067652.1-trbv |(24517, 24817)|2.74194239438|(0.914,0.935,0.896)|-1
HTGAGVSQSPRYKVTKRGQDVALRCDPISGHVALYWYQQALGQGPEFLTYFQNDAQPDKS
GLPSDRFSAERPEGSVSTLKIQRTQQGDAAVYLCASSL
>V166RF-AHZZ01067652.1-trbv |(35002, 35298)|2.35163129811|(0.948,0.715,0.895)|-1
SVDGGVTQSPRHLIKTTGQQVTLRCSPISGHTSVSWYQQALGQGPQFIFEYYEEKERERG
NFPDRFSGHQFPNYSSELNVNALEAGDSALYLCASSL
>V167RF-AHZZ01067652.1-trbv |(38310, 38607)|2.54380222029|(0.878,0.896,0.797)|-1
LVNAGVTQTPKFQVLKTGQSMTVQCAQDMNYNFMYWYRQDPGVGLRLIHYSGAAGTTDKG
EVPSGYNVSRLNTEIFPLRLESAAPSQTSVYICASSY
>V168RF-AHZZ01067652.1-trbv |(42887, 43187)|2.52706007976|(0.895,0.932,0.768)|-1
HTGARVSQSPRYKVTKRGQDVALRCDPISGHDYLYWYQQALGQGPELLTYFSYEAQQDKS
GLPSDRFSAERPEGSVSTLKIQRTQQWDSAMYLCASSL
>V169RF-AHZZ01067652.1-trbv |(53188, 53484)|1.84909781447|(0.952,0.767,0.618)|-1
SVDAGVTQSPTHLIRKRGQQVTLRCSPISGHNTVSWYQQALGQGPQFIFQYYEKEERGRG
NFPDRFSGHQFPNYSSELNVNASEMGDSALYLCASSL
>V170RF-AHZZ01067653.1-trbv |(5340, 5640)|2.46987090521|(0.928,0.916,0.748)|-1
HTGAGVSQSPSNKVTEKGKDVVLRCDPISGHAVLYWYRQNLGQGLEFLIYFQGKGAVDDS
GLCSDRFSATRPEGSASTLKIQHTEQGDSAMYFCASSL
>V171RF-AHZZ01067653.1-trbv |(10391, 10687)|2.32496076097|(0.909,0.800,0.754)|-1
SVDTGVTQSPTHLIKTRGQQVTLRCSPISGHNTVSWYQQTPGQGPQFIFEYANELRTSEG
NFPHRFSGRQFRDYHSEMNVSALELGDSALYLCASSL
>V172RF-AHZZ01067653.1-trbv |(13070, 13360)|2.47300400703|(0.878,0.758,0.894)|-1
DCGVTQTPKHLITAIGQQVTLRCSPRSGDLSVYWYQQSLGQGLQFLIQYYNGEERAKGNI
LERFSAQQFPDLHSELNLSSLELGDSALYFCASSL
>V173RF-AHZZ01067653.1-trbv |(21072, 21369)|1.86466523901|(0.846,0.502,0.910)|-1
HRDAEITQSPRHKITETGRKVTLTCHQTWNHNNMFWYQQDLGHGLRLIHYSYGVPDTNKG
EVPDGYSVSRSKTEDFPLTLESAASSQTSVYFCASSE
>V174RF-AHZZ01067653.1-trbv |(30668, 30959)|2.24281743193|(0.908,0.810,0.709)|-1
AGVAQSPRYKITEKSQAVAFWCDPISGHATLYWYRQILGQGPELLVRFQNKGVVDDSQLP
KDRFSAERLKGVDSTLRIQPAELGDSAVYLCASSL
>V175RF-AHZZ01067653.1-trbv |(43250, 43547)|2.22791903674|(0.876,0.636,0.936)|-1
HRDAEITQSPRHKVTETGRQVTLTCHQTWNHNNMFWYRQDLGHGLRLIYYSAGASIIDKG
EVPDGYVVSRSKTEDFPLTLESATRSQTSVYFCASSE
>V176RF-AHZZ01067653.1-trbv |(52368, 52659)|2.3640085914|(0.903,0.867,0.722)|-1
AGVAQSPRYKVIEKSQAVTFWCNPVSGHATLYWYRQILGQGPELLVQFRNNDVVDDSQLP
KDRFSAERLKGVNSTLKIQPAELGDSAVYLCASSL
>V177RF-AHZZ01067655.1-trbv |(10936, 11249)|2.50177098894|(0.913,0.878,0.782)|-1
SLDTAVSQTPKYLVTQTGKNESLKCEQNLGHNAMYWYKQDSKKLLKIMFIYNNKEPILNE
TVPNRFSPKSPDKAHLNLHIKSVELGDSAVYFCASSQDTALQ
>V178RF-AHZZ01067655.1-trbv |(14360, 14657)|2.28737187783|(0.793,0.878,0.688)|-1
PMDTGVTQTPRHLVMGMTNKKSLKCEQHLGHNAMYWYKQKAKKPPELMFIYNFKEPAENN
SVPSRFVPECPDSSLFYLHLRALQPEDSALYLCASSQ
>V179RF-AHZZ01067655.1-trbv |(26234, 26531)|2.73850147823|(0.916,0.963,0.875)|-1
LVNAGVTQTPKFQVLKTGQNMTLKCAQDMNHDRMYWYRQDPGMGLRLIHYSAGEGSTEKG
EVSNGYNASRLNKKDFLLRLESAAPSQTSMYFCASSE
>V180RF-AHZZ01067655.1-trbv |(28925, 29222)|2.63215664392|(0.920,0.938,0.817)|-1
PVNAGVTQTPKFQILKTGQNMTLKCAQDMNHNYMYWYRQDPGMGLRLIHYSAGEGSTEKG
EVPDGYNASRLNPQNFLLRLESAAPSQTSMYFCASSE
>V181RF-AHZZ01067655.1-trbv |(32665, 32965)|2.54930576921|(0.928,0.853,0.829)|-1
HTGAGVSQSPRNKVTEEGKDVVLRCDPISGHTALYWYRQSLGKGLEFLIYFQGNDAPDKS
GLPSGRFSAERTEGSVSTLKIQRTEQGDSAVYLCASSL
>V182RF-AHZZ01067656.1-trbv |(7797, 8088)|2.23849891047|(0.875,0.861,0.665)|-1
PEVTQTPSHQVTQMGQEVILRCVPISNHFYFYWYRQILGQKVEFLVSFVNDEISDKSEMF
DDRFSVGRSDGSNFTLKIKSTKLEDSAMYFCASSE
>V183RF-AHZZ01067656.1-trbv |(14292, 14589)|2.5952130114|(0.897,0.863,0.849)|-1
PLDTAVFQTPKYLVTQTGKKESLKCEQNLGHDTMYWYKQDSKKLLKIMFIYSNKEPILNE
TVPNRFSPDSPDKAHLNLHIKSVELGDSAVYFCASSQ
>V184RF-AHZZ01067656.1-trbv |(18626, 18923)|2.45745359449|(0.861,0.807,0.811)|-1
PTDTGVTQTPKHLVMGMTNKKSLKCEQHLGHNAMYWYKQKAKKPPELMFIYNYEKLSINE
SVPSRFSPECSKSSLLYLHLRALQPEDSALYLCASSQ
>V185RF-AHZZ01067656.1-trbv |(37172, 37469)|2.7976448876|(0.924,0.915,0.966)|-1
PANADVTQSPKFQILKTGQSMTLQCAQDMNHNSMYWYRQDPGMGLRLIHYSATKDTTDPG
EVPDGYSVSRLNKKEFLLKLESAAPSQTSVYFCASSE
>V186RF-AHZZ01067657.1-trbv |(2288, 2585)|1.85189319494|(0.888,0.869,0.518)|-1
SLDTAVSQTPKYLVTQTGKNESLKCEQNLGHDTMYWYKQDSKKLLKIMFSYNNKELFINE
TVSNRFSPDSPDKARLILHIKSLELDDSAVYFCASSQ
>V187RF-AHZZ01067659.1-trbv |(1943, 2234)|2.36466425906|(0.895,0.890,0.709)|-1
PEVTQTPSHQVTQMGQEVILRCVPISNHLYFYWYRQILGQKVEFLVSFYNGKISEQSEIF
DDRFSVGRSDGVHFTLKIKSTKLEDSAMYFCASSE
>V188RF-AHZZ01069458.1-ighv |(21609, 21918)|2.81476233922|(0.956,0.960,0.908)|-1
VQCEVQLVESGGGLVQPGASLRLSCEASGFTFGDYAMSWVHQAPGKGLEWVSSISYTGKN
IYYADSVKGRFTISRDNAKNSLSLQMNSLKTEDTAVYYCTR
>V189RF-AHZZ01069458.1-ighv |(26822, 27131)|2.99698000014|(0.998,1.000,0.999)|-1
VQCEVQLVESGGGLVQPGGSLRLSCAASGFTFSSYDMSWVRQAPGKGLEWVSYISNGGGS
TYYADSVKGRFTISRDNSKNTLSLQMNSLRAEDTAVYYCAK
>V190RF-AHZZ01069461.1-ighv |(27499, 27811)|2.88710611876|(0.964,0.982,0.944)|-1
VLSQVQLQESGPGLVKPPETLSLTCAVSGGSISDSYYWSWIRQPPGKGLEWIGYIYGGSG
STSYNPSLKSRVTLSVDTSKNQFSLKLSSVTAADTAVYYCAR
>V191RF-AHZZ01084887.1-ighv |(16319, 16625)|2.76693177722|(0.970,0.981,0.862)|-1
CAEVQLVQSGAEVKRPGESLRISCKTSGYSFTSYWISWVRQMPGKGLEWMGMIDPSDSDT
RYSPSFQGQVTISADKSISTAYLQWSSLKASDTATYYCAR
>V192RF-AHZZ01084890.1-ighv |(9388, 9701)|2.93053571945|(0.996,0.993,0.950)|-1
VQCEVQLVESGGGLVQPGGSLRLSCAASGFTFSNSWMNWVRQAPGKGLEWVARIKSKADG
ETADYAASVKGRFTISRDDSKNTLYLQMNSLKTEDTAVYYCT
>V193RF-AHZZ01084890.1-ighv |(28760, 29069)|2.60032619981|(0.985,0.797,0.954)|-1
VQGEVQLVESGGGLAKPGGSLRLSCAASGFTFSNYWMYWVRQAPGKGLEWVSAINTGGGS
TYYADSVKGRFTISRENAKNTLYLQMNSLRAEDTAVYYCAK
>V194RF-AHZZ01084892.1-ighv |(6822, 7131)|2.64176025407|(0.986,0.985,0.800)|-1
VQCEVKLVESGGGLVQPGGSLRLSCAISGFTFSNYWMFWVRQAPGKGLEWVSSISGSSSS
TYYPDSVKGRFTISRDNAKNTLYLQMNSPRAEDTAVYYCAR
>V195RF-AHZZ01084892.1-ighv |(16134, 16440)|2.64262020597|(0.840,0.931,0.962)|-1
VQCEVQLVAYGGGLQQPGGSLRLSCGFTFSDHYMSWIRQAPGKGPEWVGFMRNKANGGTT
EYATSVKGRFTISRADSKSMASLQMSSLNTEDTAVYYCAR
>V196RF-AHZZ01084892.1-ighv |(32791, 33100)|2.82039966024|(0.992,0.990,0.884)|-1
VQCEVQLVESGGGLVQPGGSLRLSCAASGFTFSDYWMDWVRQAPGKGLEWVSSVSGSSSN
TYYPDSVKGRFTISRENAKNTLYLQMNSLRAEDTAVYYCAR
>V197RF-AHZZ01084893.1-ighv |(12328, 12643)|2.98389600501|(0.996,0.997,0.991)|-1
VQCEVQLVESGGGLVQPGRSLRLSCAASGFTFSNYYMDWVRQAPGKGLEWVGRIRNKANS
YTTEYAASVKGRFTISRDDSKNTLYLQMSSLKTEDTAVYYCAR
>V198RF-AHZZ01084896.1-ighv |(1010, 1319)|2.59198391139|(0.978,0.970,0.784)|-1
VCAEVQLVQSGAEVKRPGESLRISCKTSGYSFTGSWISWVRQMPGKGLEWMGSIYPGDSD
TRYNPSFQGQVTISADKSISTAYLQWSSLKASDTATYYCAK
>V199RF-AHZZ01089503.1-iglv |(33495, 33802)|1.65119348968|(0.552,0.780,0.513)|-1
LTSQAEVIQETSRTTNPGETITLTCGSSAGAVTISSYADWFQQKPNQVPRGLIGDNTYRN
PNVPERFSGSLRAGKAVLTITGAQPEDEAFYYCALWSTDH
>V200RF-AHZZ01089506.1-iglv |(7159, 7466)|2.05332791976|(0.820,0.728,0.649)|-1
SNSQAVVTQEPSMTVFPGGTVTLTCASSTGAVTSGHSPHWFQQKPGQAPRTLIYNTNYKH
SWTPARFSGSLLGGKAALTLSGAQPEDEAEYYCWLYYSGA
>V201RF-AHZZ01089506.1-iglv |(19553, 19862)|2.35474398621|(0.942,0.676,0.994)|-1
SWAQSVLTQPPSASEAPGQRVTISCSGSSSNIGSNYVNWYQQLEGKAPKLLIYNNNQRPS
GVPDRFSGSKSGTSASLTISGLQSEDEADYYCAAWDNSLNG
>V202RF-AHZZ01089506.1-iglv |(32678, 32985)|1.90086265037|(0.840,0.916,0.514)|-1
SNSQAVVTQEPSLTVSPGGTVTLTCGSSAGAVTGSHYPYWFQQKPGQAPRTLIYNTNFKH
SWTPARFSGSLVGGKAALILSGAQPEDEAEYYCSLHYSGA
>V203RF-AHZZ01089506.1-iglv |(37855, 38165)|2.75648244609|(0.973,0.888,0.931)|-1
SLSQPVLTQPASLSASPGASARLTCTLSSGINVGSYRIYWYQQKPGSPPRYLLNYYSDSD
KDQGSGVPSRFSGSKDASANAGLLLISGLQSEDEADYYCAI
>V204RF-AHZZ01089506.1-iglv |(48570, 48877)|2.78145111307|(0.941,0.891,0.961)|-1
SWAQSVLTQPPSVSAAPGQKVTISCSGSSSNIGSKYVSWYQQLPGTAPKLLIYDNNKRPS
GISDRFSGSKSGTSATLAITGLQTGDEADYYCAAWDNSLS
>V205RF-AHZZ01089506.1-iglv |(53590, 53897)|2.87085799131|(0.980,0.959,0.940)|-1
SWAQSVLTQPPSVSGDPGQRVTISCTGSSSNIGGYYVYWYQQLPGTAPKLLIYDNNKRPS
GVSDRFSGSKSGTSASLTITGLQPGDEADYYCGAWDSSLS
>V206RF-AHZZ01089506.1-iglv |(59408, 59715)|2.82273871433|(0.972,0.924,0.940)|-1
SRAQSVLTQPPSVSGAPGQKVTISCTGSSSNIGGYNVYWYQQLPGTAPKLLIYDNNKRPS
GISDRFSGSKSGTSASLAITGLLPEDEADYYCQSYDSSLS
>V207RF-AHZZ01089506.1-iglv |(83472, 83782)|2.54102766369|(0.978,0.901,0.802)|-1
SLSQPVLTQPASLSASPGASASLTCTFSGGINVAGYYIYWYQQKPGSPPRYLLRYKSDSD
KGQGSGVPSRFSGSKDASANTGILRISGLQSEDEADYYCAI
>V208RF-AHZZ01089506.1-iglv |(88028, 88337)|2.74941528247|(0.963,0.876,0.942)|-1
SWAQSVLTQPRSASEAARKSVTISCSGSSSNIGSNSVSWYQQLPGTAPKLLIYYNDQRAS
GVSDRFSGSKSGTSASLAISGLQTEDEADYYCTAWDDSLSG
>V209RF-AHZZ01089507.1-iglv |(5814, 6121)|2.44011399089|(0.864,0.896,0.742)|-1
SNSQAVVTQEPSMTVSPGGTVTLTCASSTGAVTSGNYPNWFQQKPGQAPRTLIYNTNSKY
SWTPARFSGSLAGGKAALTLSGAQPEDEAEYYCLLYYSGA
>V210RF-AHZZ01089507.1-iglv |(10483, 10793)|2.23893785012|(0.974,0.901,0.679)|-1
SLSQPVLTQPASLSASPGASASLTCTFSGGINVAGYYIYWYQQKPGSPPRYLLWYKSDSD
KGQGSGVPSRFSGSKDASANTGILRISRLQSEDEADYYCAI
>V211RF-AHZZ01089507.1-iglv |(15336, 15645)|2.52758655771|(0.910,0.915,0.774)|-1
SWAQSVLTQPPSASGAPGQSVTISCSGSSSNIRGNGVHWYQQLSGTAPKLLIYNNNQRPS
GVPDRFSGSKSGTSASLAITGLRPEDEADYYCEAWDDSLSG
>V212RF-AHZZ01089508.1-iglv |(4484, 4790)|1.81499385967|(0.581,0.852,0.771)|-1
SLSQPVLTQPPSASASLGASVTLTCTLSSGYSNYAVDWHQQRPGKGPQFVMRVGTGGIVG
SKGDGIPDRFSGSGSGLNRYLTIKNTQEEDESDYHCGADH
>V213RF-AHZZ01089508.1-iglv |(11286, 11596)|2.62159539143|(0.964,0.843,0.892)|-1
SLSQPVLTQPTSLSASPGASARLTCTLRSGISVGSYRIFWYQQKPGSPPRYLLWYKSDSD
KHQGSGVPSRFSGSKDASANAGILLISGLQSEDEADYYCTT
>V214RF-AHZZ01089508.1-iglv |(16094, 16403)|2.8515959051|(0.989,0.914,0.972)|-1
SWAQSVLTQPPSASGAPGQRVTISCSGSSSNIGSNNVYWYQQFPGTAPKLLIYYSNQRPS
GVPDRFSGSKSGTSASLAITGLRSEDEADYYCAAWDDSLSS
>V215RF-AHZZ01090491.1-ighv |(1149, 1458)|2.85865734643|(0.999,0.982,0.910)|-1
VQCEVQLVESGGGLVKPGASLRLSCAASGFTFSSYGMHWVRQAPGKGLEWVSSISSDSSY
IYYADSVKGRFTISRDNAKNSLSLQMNSLRAEDTAVYYCAR
>V216RF-AHZZ01090492.1-ighv |(8844, 9153)|2.72931696686|(0.987,0.873,0.932)|-1
AHSQVQLVQSGAEVKKPGSSVKVSCKASGYTFTDYYMHWVRQAPGQGLEWMGEINPKTGG
TNYAQKFQGRVTMTRDTSTSTAYMELSSLRSEDTAVYYCAT
>V217RF-AHZZ01090492.1-ighv |(11745, 12060)|2.59235029122|(0.821,0.953,0.958)|-1
VQCEVQLVESGGGLVQPGGSLRLSCAASGFTFSNHCMSWVRQAPGKGPEWVGLIRNKANG
GRAEYAASVKGRFTISRDDSKSIASLQMNSLKTGDTAVYYCTR
>V218RF-AHZZ01090494.1-ighv |(1969, 2281)|2.91416889635|(0.962,0.975,0.979)|-1
VLSQVKLQESGPGLVKPSETLSLTCTVSSGSISDSYYWSWIRQAPGKGLEWIGRIYSSGS
STNYNPSLKNRVTISTDTSKNQFSLKLSSVTAADTAVYYCAR
>V219RF-AHZZ01090495.1-ighv |(1255, 1564)|2.80133395491|(0.962,0.993,0.878)|-1
AQSQVQLVQSGAEVKKPGASVKLSCKASGFTFISYAISWVRQAPGQGLEWMGEIIPAFGI
ADYAQKFQGRVTITADTSTSTAYMELSSRRSEDTAVYYCAR
>V220RF-AHZZ01093946.1-trav |(12355, 12645)|2.35341387105|(0.756,0.781,0.867)|-1
VSSEDKVMQNPLSLVVHEGDTVTLNCSYEVVNFQSLLWYKQEKKAPTFLFTLTSSGIEKK
SGRLSSILDKKDFFSILNITATQTRDSAVYLCAVE
>V221RF-AHZZ01093949.1-trav |(3892, 4191)|2.37457757436|(0.843,0.795,0.768)|-1
VNGQQIMQIPQYQHVQEGEDFTTYCNSSTTLNNIQWYKQRPGGHPVFLIMLVKSGEVKKQ
KRLTFQFGEAKKNSSLHITATQTTDVGSYFCAGHSAPQ
>V222RF-AHZZ01093949.1-trav |(14852, 15142)|2.22340863347|(0.770,0.668,0.854)|-1
TIIDAKTTQPTSMDCAEGRAANLPCNHSTIGGNEYIHWYRQIHSQGPQYVIHGLKNNETN
AMASLIITEDRKSSTLILPHATLRDTAVYYCIVRV
>V223RF-AHZZ01093949.1-trav |(55719, 56043)|2.14444808102|(0.685,0.770,0.724)|-1
VNSQQKNDDQQVKQNPPSLSVQEGGISILNCDYTNSMFDYFLWYKKYPAEGPTFLISISS
VKDKNEEGRFTVFLNKSAKHLSLHIRASQPGDSAVYLCAARAQCSP
>V224RF-AHZZ01093949.1-trav |(61192, 61479)|2.33902699409|(0.767,0.746,0.867)|-1
VRSQKPVQSPQVVILQEGEDAIINCNSSKALYSVHWYRQKHGEAPVFLMILLKGGEQKSH
DKIVATFNEKKQQSSLYLMASQLSYSRTYFCGAE
>V225RF-AHZZ01093949.1-trav |(89299, 89586)|2.28999468512|(0.736,0.763,0.918)|-1
VSSQELEQSPQSLIVQEGKNLTINCTSSKTLYGLHWYKQKYGEGLIFLIMLQQGGEEKSH
EKITAKLDEKKQQSFLHITASQPSHAGIYLCGGD
>V226RF-AHZZ01093953.1-trav |(7506, 7806)|2.19236420509|(0.776,0.698,0.746)|-1
SSVAQKVTQAQSSVSMPVGKAVTLNCQYETSSWSYDLFWYKQPPSKEMIFLIRQGYSEQN
ARNGRYSVNFQKAASSIALTISALQLEDSATYFCALRE
>V227RF-AHZZ01096568.1-ighv |(3158, 3467)|2.93970402421|(0.984,0.977,0.979)|-1
VLSQVQLQESGPGLVKPSETLSLTCAVSGGSISSSYWNWIRQAPGKGLEWIGRIYSSGSS
TNYNPSLKNRVTISTDTSKNQFSLKLSSVTAADTAVYYCAR
>V228RF-AHZZ01096568.1-ighv |(16270, 16579)|2.87927015267|(0.993,0.919,0.989)|-1
VQGEVQLVESGGGLAKPGGSLRLSCAASGFTFSSYGMSWVRQAPGKGLEWVSAISSGGGS
TYYADSVKGRFTISRDNSKNTLSLQMNSLRAEDTAVYYCAK
>V229RF-AHZZ01096572.1-ighv |(422, 737)|2.812165773|(0.918,0.980,0.930)|-1
VQCEVQLVESGRGLVQPGGSLRLSCAVSGFTFSDHYMSWVRQAPGKGPEWVGFMRNKANG
GRTEYAASVKGRFTISRDDSKSTPSLQMSSLNTEDTAVYYCAR
>V230RF-AHZZ01096574.1-ighv |(7206, 7516)|2.98045211916|(0.996,1.000,0.985)|-1
VQCEVQLVESGGGLAQPGGSLRLSCVASGFTFSDHYMDWVRQAPGKGLEWVSSISTGSGS
TTLYPDSVKGRFTISRDNAKNTVYLQMNSLRAEDTAVYYCA
>V231RF-AHZZ01096575.1-ighv |(832, 1141)|2.82838325905|(0.960,0.989,0.898)|-1
AHSEVQLVQSGAEVRKPGATVKISCKASGYTFTDYYLSWVRQAPGKGLEWMGCVDPEDGE
AIYAQKFQGRVTITADTSTDTAYMELSSLRSEDTAVYYCAR
>V232RF-AHZZ01097564.1-trbv |(19525, 19819)|1.97120152011|(0.754,0.747,0.582)|-1
VRSQTIHQWPATLVQPVGSPLSLECTVEGTSNPNLYWYRQAAGRGLQLLFYSIGVDQISS
EVPQNLSASRPQDRRFILSSKKLLLSDSGFYLCAWS
>V233RF-AHZZ01103093.1-ighv |(4113, 4425)|2.79853093928|(0.919,0.912,0.985)|-1
VLSQVQLQESGPGLLKPSETLSLTCAISGGSISSSYHYWSWIRQAPGKGLEWIGYISYSG
STNYNPSLKSRVTISTDTSKNQFSLKLSSVTAADTAVYYCAR
>V234RF-AHZZ01103093.1-ighv |(19002, 19311)|2.43209810031|(0.971,0.969,0.718)|-1
VLSQVQLQESGPGLVKPSETLSLTCAVSGYSISSGYYWGWIRQPPGKGLEWIGSIYSSGS
NYLNPSLKSRVTLSVDTSKNQFSLKLSSVTAADTAVYYCAR
>V235RF-AHZZ01103094.1-ighv |(666, 977)|2.8984255402|(0.996,0.987,0.932)|-1
VQCEVQLVESGGGVVQPGGSLRLSCAASGFTFDDYAMGWVRQAPGKGLEWVSAISWSGGS
TGYADSVKGRFTISRDNAKNSLYLQMNRLRAEDTALYYCAKD
>V236RF-AHZZ01103096.1-ighv |(14463, 14777)|2.16327971271|(0.961,0.619,0.957)|-1
VLSQVTLKESGPALVKPTQTLTLTCTLSGFSISTSGTGVGWIRQPPGKALEWLASIYWND
SKYYSTSLKSRLTISKDTSKNQVVLTMTSMDPVDTATYYCARV
>V237RF-AHZZ01103097.1-ighv |(667, 978)|2.94921046559|(0.972,0.995,0.985)|-1
VQCDVQLVESGGGLVKPGGSLRLSCVASGFTFSSYEMHWVRQAPGKGLEWVSGISTSGGT
TYYADSVKGRFTISRDNAKNSLFLQMNSLRAEDTAVYYCAKE
>V238RF-AHZZ01103097.1-ighv |(4629, 4936)|2.41970441502|(0.951,0.946,0.718)|-1
VLSQVQLQESGPGVVKPSETLSLTCAVSGYSISSGYYWGWIRQPPGKGLEWIGSIYSSGS
NYLNPSLKSRVTLSVDTSKNQFSLKLSSVTAADTAVYYCA
>V239RF-AHZZ01103258.1-ighv |(1265, 1574)|2.91621046559|(0.985,0.962,0.972)|-1
VLSQVQLQESGPGLVKPSETLSLTCAVSGGSISSNYWNWIRQAPGKGLEWIGSIYSSGSS
TNYNPSLKNRVTISTDTSKNQFSLKLSSVTAADTAVYYCAR
>V240RF-AHZZ01104243.1-igkv |(7682, 7981)|2.79143885587|(0.985,0.870,0.988)|-1
TTGEIVLTQSPATLSLSPGERATLSCRASQSVSSSLAWYQQKSGQAPRLLIYGASSRATG
IPDRFSGSGSGTDFTLTISILEPEDVAVYYCQQYYNWN
>V241RF-AHZZ01105198.1-iglv |(1704, 2007)|2.8479084505|(0.996,0.913,0.969)|-1
SWAQSALTQPRSVSGSPGQSVTISCTGTSSDIGGYNYVSWYQQHPGKAPKLMIYDVSKRP
SGVSDRFSGSKSGNTASLTISGLQAEDEADYYCSSYAGS
>V242RF-AHZZ01105198.1-iglv |(11242, 11543)|2.27009521511|(0.871,0.662,0.901)|-1
TLSVSVSPGQTARITCSGDVLKENYADWYQQKPGQAPVLVIYEDSKRPSGIPERFSGSTS
GDTTTLTISSTLSEDEADYYCFSGNENNPIVTQADGEV
>V243RF-AHZZ01105199.1-iglv |(5057, 5367)|2.8276249066|(0.976,0.896,0.981)|-1
SWAQAALTQPPSVSKSLGQSVTISCTGTSNDIGGYNAVSWYQQHPGTAPRLLIYEVSNRP
SGVSDRFSGSKSGNTASLTISGLQAEDEADYYCGSYRSGST
>V244RF-AHZZ01105199.1-iglv |(17460, 17763)|2.80771781723|(0.987,0.906,0.947)|-1
SAASYELTQPHSVSVSPGQTARITCGGDNIGSKYVQWYQQKPAQAPVLVIYADSERPSGI
PERFSGSKSGNTATLTISGVEAGDEADYYCQVWDSSSDH
>V245RF-AHZZ01105200.1-iglv |(5627, 5930)|1.54067004618|(0.913,0.582,0.647)|-1
SVVSSELTQEPALSVALGHTVRMTCQGDSLKTYYASWYQQKPGQVPVLVIYGNTNRPSGI
PGRFSGSWSGNTGSLTITAAQVEDEADYYCGSWDNSGNH
>V246RF-AHZZ01105200.1-iglv |(22027, 22338)|2.61823142636|(0.992,0.832,0.915)|-1
SAASYELTQPGSVSVSPRQTARITCGGDNIGSKSVHWYQQKPGQAPVLVIYNDSERPSGI
PERFSGSNSGNTATLTISGVEAGDEADYYCQVWDSSSKYATV
>V247RF-AHZZ01105200.1-igkv |(26500, 26797)|2.0136055512|(0.767,0.668,0.661)|-1
SVVSSELTQSCMSVPGTYSQDDCQGDSLKTYYASWYQQKQARSLCWSSMVTTTGPQGSPG
RFSVSWSGNTGSLTITAAQVEDEADYYCNSWDSSGNH
>V248RF-AHZZ01105201.1-iglv |(54273, 54578)|2.93032022844|(0.981,0.982,0.968)|-1
SVASYELTQPPSVSVSPGQTARITCSGDALPKNYAYWYQQKPGQAPVLVIYKDSERPSGI
PERFSSSSSGTTVTLTISGAQAEDEADYYCYSGDGNSLTV
>V249RF-AHZZ01105201.1-iglv |(63444, 63754)|2.96126023048|(0.993,0.989,0.980)|-1
SWAQSALTQPPSVSGSPGQSVTISCTGTSSDVGGYNYVSWYQQHPGTAPKLMIYDVSNRP
SGVSDRFSGSKSGNTASLTISGLQAEDEADYYCCSYTTSST
>V250RF-AHZZ01105201.1-iglv |(75648, 75951)|2.56677613807|(0.966,0.891,0.817)|-1
SAASYELTQPPSVSVSPGQTARITCGGDNIGSEAVHWYQQKPPQAPVLVIYADSERPSGI
PERFSGSNSGNTATLTISGVEAGDEADYYCQVWDISNDH
>V251RF-AHZZ01106331.1-igkv |(10056, 10356)|2.96748011776|(0.994,0.983,0.991)|-1
ARCDIQLTQSPSSLSASVGDRVTITCRASQGISSYLAWYQQKPGKAPKLLIYDASNLQSG
VPSRFSGSGSGTEFTLTISSLQPEDFAVYYCQQRNSYP
>V252RF-AHZZ01106331.1-igkv |(16128, 16428)|2.8590333829|(0.990,0.986,0.909)|-1
AKCDIQMTQSPSSLSASVGDRVTITCRASQGISSYLAWYQQKPGKAPKPLIYYASNLESG
VPSRFSGSGSGTEFTLTISSLQPEDFATYYCQQYNSAP
>V253RF-AHZZ01106331.1-igkv |(33100, 33400)|2.80291286311|(0.982,0.991,0.875)|-1
ARCDIQMTQSPSSLSASAGDRVTITCRASQGISTYLNWYQQKPGKAPTRLIYAASSLQSG
VPSRFSGSGSGTEFTLTISSLQPEDFATYYCLQYNSAP
>V254RF-AHZZ01106331.1-igkv |(43583, 43883)|2.77644925142|(0.952,0.875,0.975)|-1
TTGETVMTQSPATLSLSPGERATLSCRASQSVGSSLAWYQQKPGQAPRLLVYYASSRATG
IPDRFSGSGSGTDFTLTISSLEPEDVGVYYCQKYNDWP
>V255RF-AHZZ01107345.1-trbv |(266, 563)|2.39491440485|(0.857,0.855,0.738)|-1
PIDSGITQTPKHLVIGMTNKKSLKCEQHMGHRAVYWYKQKAKKPPEIMFMYNYETLSINE
SVPSRFSPECSKSSLLHLHLQALQPEDSALYLCASSQ
>V256RF-AHZZ01107346.1-trbv |(98987, 99285)|2.4864242177|(0.931,0.856,0.794)|-1
TQTPSHQVTQMGQEVILRCVPIPNHLNFYWYRQILGQKVEFLVYFYNDNISEKSEIFDDR
FSVERPDGSNFTLKIKSTKLEDSAMYFCASSEATALQ
>V257RF-AHZZ01107346.1-trbv |(105930, 106243)|2.38207019773|(0.896,0.848,0.740)|-1
SLDTAVSQTPKYLVTQTGKKESLKCEQNLGHDAMYWYKQDSKKLLKIMFSYNNKELIINE
TVPNRISPDSPDKAHLNLHIKSVELGDSAVYFCASSQATALQ
>V258RF-AHZZ01107346.1-trbv |(110556, 110852)|1.61575037655|(0.599,0.889,0.474)|-1
PIDSGVTQTPKHLVIGMTNKKSLKCEQHMGHRAVYWYKQKAKKPPEIMFMYNYETLSINE
SVPSRFSPECSKSSLLHLHLQALQPETQPCISAPAAQ
>V259RF-AHZZ01107395.1-igkv |(1617, 1915)|2.73963747374|(0.925,0.892,0.927)|-1
TTGEIVMTQSPATLSLSPGERATLSCRASQSVNSYLAWYQQKPGQAPRLLIYDASSRATG
IPDRFSGSGSGTDFTLTISSLEPEDVAVYFCLQSSNW
>V260RF-AHZZ01107399.1-igkv |(425, 725)|2.95975367204|(0.998,0.977,0.987)|-1
AKCDIQMTQSPPSLSASVGDRVTITCQASQGISNWLAWYQQKPGEAPKLLIYAASTLQSG
VPSRFSGSGSGTEFTLTISSLQPEDFATYYCQQHNSYP
>V261RF-AHZZ01108758.1-ighv |(6447, 6754)|2.91982866804|(0.980,0.963,0.978)|-1
VLSQVQLQESGPGVVKPSETLSLTCAVYGGSVSGSYWSWIRQAPGKGLEWIGEINGNSGS
TSYNPSLKSRVTISTDTSKNQFSLKLSSVTAADTAVYYCA
>V262RF-AHZZ01110488.1-igkv |(1345, 1645)|2.96427613247|(0.988,0.979,0.998)|-1
ARCDIQMTQSPSSLSASVGDKVTITCHASQSISSWLAWYQQKPGKAPKLLIYKASSLQSG
VPSRFSGSGSGTDFTLTISSLQPEDFATYYCQQYDSNH
>V263RF-AHZZ01111138.1-igkv |(1438, 1738)|2.95108424741|(0.994,0.967,0.993)|-1
ARCDIQMTQSPSSLSASVGDKVTITCHASQGISSWLSWYQQKPGKAPKLLIYKASSLQSG
VPSRFSGSGSGTDFTLTISSLQPEDFATYYCQQYSSSP
>V264RF-AHZZ01111138.1-igkv |(3529, 3815)|2.54942772917|(0.866,0.820,0.872)|-1
IVMTQSPATLSLSPGERATLSCRASQSVSSRLAWYQQKPGEAPRLLIYDASSRATGIPAR
FSGSGSGTDFTLTISSLEPEDVAVYFCQQESNW
>V265RF-AHZZ01111138.1-igkv |(14203, 14503)|2.98248011776|(0.997,1.000,0.986)|-1
ARCDIQMTQSPPSLSASVGDRVTITCQASQSISNYLAWYQQKPGKAPKLLIYAASTLQSG
VPSRFSGSGSGTEFTLTISSLQPEDFATYYCQRHNSYP
>V266RF-AHZZ01111367.1-igkv |(1438, 1738)|2.95108424741|(0.994,0.967,0.993)|-1
ARCDIQMTQSPSSLSASVGDKVTITCHASQGISSWLSWYQQKPGKAPKLLIYKASSLQSG
VPSRFSGSGSGTDFTLTISSLQPEDFATYYCQQYSSSP
>V267RF-AHZZ01111367.1-igkv |(3529, 3815)|2.54942772917|(0.866,0.820,0.872)|-1
IVMTQSPATLSLSPGERATLSCRASQSVSSRLAWYQQKPGEAPRLLIYDASSRATGIPAR
FSGSGSGTDFTLTISSLEPEDVAVYFCQQESNW
>V268RF-AHZZ01111367.1-igkv |(14330, 14630)|2.97352104271|(0.997,1.000,0.978)|-1
ARCDIQMTQSPPSLSASVGDRVTITCQASQGISNYLAWYQQKPGKAPKLLIYAASTLQSG
VASRFSGSGSGTEFTLTISSLQPEDFATYYCQQHNSYP
>V269RF-AHZZ01112481.1-ighv |(613, 919)|2.92356084981|(0.979,0.985,0.961)|-1
VLSQVQLQESGPGVVKPSETLSLTCAVSGGSISSSYWSWIRQPPGKGLEWIGYIYGGGST
NYNPSLKSRVTMSADTSKNQLSLKLSSVTAADTAVYYCAR
>V270RF-AHZZ01125719.1-ighv |(24239, 24554)|2.91204205111|(0.987,0.997,0.938)|-1
VQCEVQLVESGGGLVQPGGSLRVSCAASGFTFSNHYMQWVRQAPGKGLEWVGFIRNKANG
GTAEYAASVKGRFTISRDDSKSIASLQMNSLKTEDTAVYYCAR
>V271RF-AHZZ01125719.1-ighv |(41713, 42022)|2.88413808115|(0.940,0.967,0.990)|-1
VQCEVQLAESGGGLVQPGGSLRLSCAASGFTFSSYEMHWVRQAPGKGLESVSVISGDSSY
THYADSVKGRFTISRDNAKNSLSLQMNSLRAEDTAVYYCAR
>V272RF-AHZZ01125719.1-ighv |(47992, 48299)|2.7522783301|(0.976,0.962,0.864)|-1
AHAQVQLVQSGPEVKQPGASVKVSCKASGYTFTSYGMNWVRQAHGQRLEWMGWINTDSGN
PTYAQGFKERFTFSMDTSISTAYLQISSLKAEDTAVYYCA
>V273RF-AHZZ01181503.1-ighv |(302, 609)|2.7522783301|(0.976,0.962,0.864)|-1
AHAQVQLVQSGPEVKQPGASVKVSCKASGYTFTSYGMNWVRQAHGQRLEWMGWINTDSGN
PTYAQGFKERFTFSMDTSISTAYLQISSLKAEDTAVYYCA
>V274RF-AHZZ01185532.1-igkv |(806, 1093)|2.76469891567|(0.970,0.881,0.947)|-1
TVVTQSPATLSLSPGERATISCRTSQSVGSRLAWYQQKPGQAPRLLIYGASNRATGIPDR
FSGSGSGTDFTLTISSLKPEDAAVYYCQQDNDWK
>V275RF-AHZZ01189918.1-igkv |(12178, 12478)|2.98866005261|(1.000,0.991,0.998)|-1
ARCDIQMTQSPSSRSASVGDTVTITCQASQGISDYLAWYQQKPGKAPKLLIYAASNLESG
VPSRFSGSGSGTDFTLTISSLQPEDFATYYCQQYDSDP
>V276RF-AHZZ01189922.1-igkv |(4528, 4816)|2.75843538699|(0.978,0.923,0.896)|-1
IVMTQSPATLSLSLGETATISCRTSQSVGSKLAWYQQKPGQAPRLLIYGASSRATGIPDR
FSGSGSGTDFTLTISSLEPEDFAVYYCQETSNLS
>V277RF-AHZZ01189923.1-igkv |(14019, 14319)|2.82897916207|(0.935,0.914,0.997)|-1
ARCDIQMTLSPSSLSASVGDRVTITCRASQDISSYLNWYQQKPGKAPKLLIYYATSLESG
VPSRFSGSGSGTDFTLTISSLQPEDFATYYCQQFKSYP
>V278RF-AHZZ01198546.1-iglv |(10660, 10958)|2.25923040564|(0.799,0.679,0.846)|-1
LCALPVLTQPPSASASLGASVKLTCTLSSEHSNYFIIWYQQRPGRSPQYIMKVNSDGTHS
KGDGIPDRFLGSSSGADRYLTISNLQSDDEAEYYCGE
>V279RF-AHZZ01198547.1-iglv |(468, 766)|1.69728413206|(0.741,0.572,0.585)|-1
LCALPVLTQPPSASASLGASVKLTCTLSSEHSNYTIEWYQQRPGRSPRYIMKVNSDGTHS
KGDEIPDRFLGSSSGVDRYLTISNLQSDDEAEYYCGE
>V280RF-AHZZ01198550.1-iglv |(4766, 5062)|1.84806737671|(0.902,0.509,0.898)|-1
SVASYELTQPLSVSVALGQMARITCGGNNIGRKNVYWYQQKPVQAPVPVIYEDSKRPSGI
PKRFSGSNSGNTATLTIDGAQAGDEADYYCQVWDSST
>V281RF-AHZZ01198550.1-iglv |(8130, 8433)|2.65341399606|(0.980,0.817,0.959)|-1
SWAQAALTQPHSVSGSPGQSVTISCTGTSSDIGGYDRVSWYQQHPGKAPKLMIYEVSKRP
SGVSDRFSGSKSGNTASLTISGLQAEDEADYYCSSYAGS
>V282RF-AHZZ01198550.1-iglv |(32463, 32773)|2.53723906676|(0.825,0.834,0.902)|-1
SWAQSALIQSPSVSGSLGQSVTISCTGTSSDIGRYNYVSWYRQQPGTTTKLMMYNVNTRP
SGVSDRFSGSKSGNTASLTISGLQAEDEADYYCSSYEASDT
>V283RF-AHZZ01198551.1-iglv |(10418, 10728)|2.93266595283|(0.989,0.967,0.979)|-1
SWAQSAPTQPPSVSGSPGQSVTISCTGTSSDIGYYNAVSWYQQHPGTAPKLMIYRVSNRP
SGVSDRFSGSKSGNTASLTISGLQAEDEADYYCSSYAGSDT
>V284RF-AHZZ01198551.1-iglv |(33935, 34238)|2.64932570901|(0.978,0.865,0.888)|-1
SAASYELTQPPSVSVSPGQMARITCSGDALPEKYADWYQQKPGQSPVLIIYEDSKWPSGI
PERFSGSSSGTVATLTISGAQVEDEADYYCYSTDSSGNH
>V285RF-AHZZ01198553.1-iglv |(13429, 13732)|2.33002431825|(0.958,0.908,0.703)|-1
SVVSSELTQDPAVSVALGQTVRITCQGDSLSSYYASWYQQKPGQAPVLVIYGNNNRPSGI
PERFSVSWSGNTGSLTITGAQVEDEADYYCGSWDSSGNH
>V286RF-AHZZ01198553.1-igkv |(31919, 32229)|2.58848400784|(0.874,0.809,0.939)|-1
SWAQAALTQPPSVSKSLGQSVTISCAGTSSGIASYSDVSWYQQHPGTAPRLLIYSVSNRP
SGVSDRFSGFKSGSTASLTISGLQAEDEAIYYCCSYRSGST
>V287RF-AHZZ01198553.1-iglv |(39757, 40060)|2.66447706835|(0.911,0.841,0.934)|-1
SEASYELIQPPSVSVSPGQTARITCSGDALPDYYAYWYQQKSGQAPMLVIYKDSERPSGI
PERFSGSSSGTTVTLTISGVQAEDEADYYCQSADSSGNH
>V288RF-AHZZ01198553.1-iglv |(56860, 57163)|2.8170138344|(0.960,0.910,0.957)|-1
SATSYELTQPPSVSAASGQTARITCGGDSIGSKNVQWYQQKPAQAPVLVIYADSKRPSGI
PERFSGSNSGNTATLTISGVEAGDEADYYCQVWDSSSKH
>V289RF-AHZZ01198553.1-iglv |(68992, 69302)|2.88230439061|(0.989,0.932,0.975)|-1
SWAQAALTQPPSVSGSPGQSVTISCTGTSSDIGGYNYVSWYQQHPGKAPKLMIYEVSKRP
SGVSDRFSGSKSGNTASLTISGLQAEDEADYYCGSYASSST
>V0RF-ABGA01025787.1-ighv |(2055, 2364)|2.79817372755|(0.972,0.971,0.885)|1
TYSQVQLVQSGHEVKQPGASVKVSCKDSGYSFTTYGMNWVQQAPEQGLEWMGWFNTDTGN
PTYAQGFTGRFVFSMDTSVSTAYLQISSLKAEDTAMYYCAR
>V1RF-ABGA01025787.1-ighv |(23079, 23369)|2.18062307812|(0.698,0.730,0.790)|1
EVKKPGESLRISCKTSGYSFTSYWIHWVRQVPEKELEWIGGIYPGNSDTRYSPSFQGHVT
ISADSSISTTYLQWSSLKASDTAMYYCVRQTIQNL
>V2RF-ABGA01025790.1-ighv |(836, 1151)|2.63991474138|(0.939,0.797,0.993)|1
VQCEVQLVESGGGLVQPGGSLRLSCAASGFTSSDYQMYWVRQASGKGPEWVGYIGSKSNS
YATAYAASVKGRFTISRDDSKNTLYLQMNSLKTEDMAVYYCAR
>V3RF-ABGA01025791.1-ighv |(3901, 4216)|2.99275601537|(0.994,0.999,1.000)|1
VQCEVQLVESGGGLVQPGGSLRLSCAASGFTFSSYWMSWVRQAPGKGLEWVGFIKNKADG
GTTDYAASVKGRFTISRDDSKNTLYLQMNSLKTEDTAIYYCAR
>V4RF-ABGA01025791.1-ighv |(14222, 14536)|2.14600394746|(0.748,0.648,0.974)|1
VLSQVTLKESGPALVKPTQTLTLTCTFSGFSLSTSGIGVGWIRQPLGKAMEWLAHIYWTD
SKYYSSSLKSRLTISKDTSKSQVVLIMTSMDPVDTATYYCARI
>V5RF-ABGA01025797.1-ighv |(8415, 8724)|2.91783228016|(0.962,0.989,0.970)|1
VQCEVQLVESGGGLVQPGGSLRLSCVASGFTFSSYAMRWVHQAPGKGLEWVSAISGSGGS
TWYPDSVKGRFTISRDNAKNTLYLQMNSLRAEDTAVYYCVR
>V6RF-ABGA01025808.1-ighv |(3704, 4019)|2.97580001|(0.992,0.987,0.997)|1
VQCEVQLVESGGGLVQPGGSLRLSCAASGFTFSSSAMHWVRQAPGKGLEWVGRIRSKANS
YATEYAASVKGRFTISRDDSKNTAYLQMNSLKTEDTALYYCTT
>V7RF-ABGA01025808.1-ighv |(11416, 11731)|2.98164005313|(0.998,0.995,0.989)|1
LQCEVQLVESGGGLVQPGGSLRLSCAASGFTFSDHYMDWVRQAPGKGLEWVARIRNKANS
YTTEYAASVKGRFTISRDDSKNTLYLQMSSLKTEDTAVYYCAR
>V8RF-ABGA01025808.1-ighv |(27673, 27982)|2.96800135931|(1.000,0.980,0.990)|1
VQCEVQLVESGGGLVQPGGSLRLSCAASGFTFRDHYMNWVRQAPGKGLEWVSAISGSSSS
TYYADSVKGRFTISRDNAKNTLYLQMNSLRAEDTAVYYCVR
>V9RF-ABGA01025808.1-ighv |(39511, 39826)|2.93390741148|(0.987,0.995,0.956)|1
VQCEVQLVESGGGLVQPGGSLRLSCAASGFTFSNYYMSWVRQAPGKGLEWEGFIKNKTNG
GTTEYAASVKGRFTISRDDSKSITYLQMSSLKTEDTAVYYCTR
>V10RF-ABGA01025808.1-ighv |(52101, 52413)|2.80955536887|(0.973,0.881,0.990)|1
VQCELQLVESRGDLVQPGGSLRLSCAASGFTFSSYGMNWVCQAPGKGLEWVSVISRSSGT
IHYADSMKGRFTISRDNAKNSLYLQMNNSLRAEDTAVYYCVK
>V11RF-ABGA01025808.1-ighv |(56691, 57005)|1.86822803887|(0.941,0.815,0.580)|1
VFSQVTLKESGPALVKPTQTLTLTCTFSGFSLSTSGVGVGWIRQPPGKALEWLASIDWDD
DKYYSPSLKSRLTISKDTSKNQVVITMTNMDPVDTATYYCARI
>V12RF-ABGA01025808.1-ighv |(65728, 66037)|2.71850385308|(0.933,0.963,0.852)|1
VQSQVQLVQSGAEVKKPGSSVKISCKVSEDTFSSYAISWVQQAPGQGLEWMGGIIPVLGT
ADYAQKFQGRVTITADTSTSTAYMELSSLRSEDTAVYYCAT
>V13RF-ABGA01025810.1-ighv |(7175, 7481)|2.97851211712|(0.989,0.990,1.000)|1
VQCEVQLVESGGGLVQPGGSLRLSCAASGFTISSYDMHWVHQAPGKGLEWVSAISTGGGT
YYADSVKGRFTISRDNAKNTLYLQMNNLRAEDTAVYYCAK
>V14RF-ABGA01037228.1-ighv |(1414, 1723)|2.86127460261|(0.997,0.906,0.991)|1
VLSQVQLQESGPGLVKPSETLSLTCAVSGGSISSGYYWGWIRQPPGKGLEWIGSIYYSGS
TYYNPSLKSRVTISVDTSKNQFSLKLSSVTAEDTAVYYCAR
>V15RF-ABGA01044302.1-ighv |(5170, 5476)|2.96598000014|(0.989,0.987,0.990)|1
VLSQVQLQESGPGLVKPSETLSLTCAVSGGSISSYYWSWIQQPPGKGLEWIGYIYSSGST
NYNPSLKSRVTMSVDTSKNQFSLKLSSVTAADTAVYYCAR
>V16RF-ABGA01044302.1-ighv |(9977, 10286)|2.8066448876|(0.955,0.913,0.946)|1
AHSQVQLGQSGPQVKKPESSVKVSCKASGYTFTSSAMQWVRQAPGQGLEWIGWIIVGSGN
TNYAQKFQGRVTITRDTSTSTAYMELSSLRSEDTAVYYCAA
>V17RF-ABGA01044304.1-ighv |(6033, 6342)|2.86617331012|(1.000,0.906,0.995)|1
VLSQVQLQESGPGLVKPSETLSLTCAVSGGSISSGYYWGWIRQPPGKGLEWIGSIYYSGS
TYYNPSLKSRVTISVDTSKNQFSLKLSSVTAADTAVYYCAR
>V18RF-ABGA01044305.1-ighv |(3517, 3823)|2.96050267138|(0.998,0.991,0.974)|1
VLSQVQLQESGPGLVKPSETLSLTCAVSGGSISSYYWGWIRQPPGKGLEWIGYIYSSGST
NYNPSLKSRVTMSVDTSKNQFSLKLSSVTAADTAVYYCVR
>V19RF-ABGA01044306.1-ighv |(1052, 1358)|2.98599600001|(0.995,0.995,0.996)|1
VLSQVQLQESGPGLVKPSETLSLTCAVSGGSISSNYWSWIRQPPGKGLEWIGYIYSSGST
YYNPSLKSRVTMSIDTSKNQFSLKLSSVTAADTAVYYCAR
>V20RF-ABGA01044306.1-ighv |(5855, 6164)|2.38033370599|(0.754,0.919,0.839)|1
AHSQVQLVQSGPEVKKPGSSVKVSFKSSGYTFTSSAMQWVQQAPGQGLEWIGWIIVGNGN
TNYAQKFQGRVTITRDMSTSTAYMELSSLRSEDMAEYYSAA
>V21RF-ABGA01044307.1-ighv |(456, 762)|2.98128017622|(1.000,0.994,0.988)|1
VLSQVQLQESGPGLVKPSETLSLTCAVSGGSISSYYWSWIRQPPGKGLEWIGGIYSSGST
YYNPSLKSRVTISVDTSKNQFSLKLSSVTAADTAVYYCAR
>V22RF-ABGA01044310.1-ighv |(2823, 3129)|2.58847982967|(0.990,0.772,1.000)|1
VQCEVQLVESGGGLVQPGGSLRLSCAASGFTVSSSSMIWVRQAPGKGLEWVSYISSDGSA
YYTDSVKGRFTVSRDNSKNTLYLQMNSLRAEDTAVYYCAK
>V23RF-ABGA01044310.1-ighv |(11412, 11713)|2.01918065361|(0.711,0.742,0.610)|1
LVQPGGSLRLSFAASGFTFSSSWMHWVCQAPEKGLERVANIKCDGSEKYYADSVKGRLTI
SRDNAKNSLYLQMNSLRAEDMAVYYCVRDTVRGGQCEP
>V24RF-ABGA01044310.1-ighv |(19037, 19346)|2.60784243977|(0.970,0.974,0.788)|1
VCAEVQLVQSGAEVKRPGESLRISCKTSGYSFTSNWISWVRQMPGKGLEWMGSIYPGDSD
TRYSPSFQGHVTISADKSISTAYLQWSSLKASDTAMYYCAK
>V25RF-ABGA01044313.1-ighv |(11041, 11356)|2.96100040988|(0.994,0.979,0.989)|1
VQCEVQLVESGGGLVHPGGSLRLSCTASGFTFGDYAMSWVRQAPGKGLEWVGFIRSKAYG
GTTEYAASVKGRFTISRDDSKSIAYLQMNSLKTEDTAVYYCAR
>V26RF-ABGA01044314.1-ighv |(13359, 13668)|2.52435322142|(0.992,0.747,0.999)|1
VQCEVQLVESGGGLVQPGGSLRLSCAASEFTFSSNDMSWVRQAPEKGLEWVSYISNSGRT
TYYADSVKGRFTISRDNAKNSLYLQMNSLRAEDTAVYYCVR
>V27RF-ABGA01044316.1-ighv |(6559, 6865)|2.0516644567|(0.907,0.561,0.994)|1
VQCEDQLVVSAGGLVQPGGSLRPSCAASGFAFSSYVLHWVRRAPGKGLEWVSAIGTGGDT
YYADSVMGRFTISRDNAKKSLYLQMNSLIAEDTAVYYCAR
>V28RF-ABGA01044316.1-ighv |(14128, 14437)|2.50375424817|(0.872,0.799,0.855)|1
AHSQVQLVQSGAEVKRPGASVKVSCKASGYTFTSCYMYWVQQAPGQGLEWMGVINPSDGS
TSYAQKFQGRVTMTRDTSTSTVYMELSSLRSEDTAVYYYAR
>V29RF-ABGA01044319.1-ighv |(4092, 4401)|2.90754055392|(0.945,0.991,0.987)|1
VQCEVQLVESEGGLVQPGGSLRLSCAASGFTFDDYAMHWVRQAPGKGLKWVSGINWNGGS
TYYADSVKGRFTISRDNSKNSLYLQMNSLRAEDTALYYCAK
>V30RF-ABGA01058270.1-ighv |(14488, 14797)|2.71715142407|(0.951,0.966,0.845)|1
VLSQVQLQQWGPGLVKPSETLSLTCAVCGGSISSGYYWSWIRQPPGKGLEWIGYMHHSGS
TYYNPSLKSRVTMSVETSKNQFSLKLSSVTAADTAVYYCAR
>V31RF-ABGA01058270.1-ighv |(28194, 28503)|2.7539654602|(0.968,0.928,0.889)|1
VQCEVQLVESGGGLVQSRGSLRFSCAASGFTFSSCGMNWVRQAPGKGLEWVAIIWYDGSN
KYYADSVKGRFTISRDNSKNMLYLQMNSLRVEDMAVYYCAK
>V32RF-ABGA01058270.1-ighv |(38768, 39077)|2.83515456587|(0.963,0.922,0.957)|1
VLSQVRLQESGPGLVKPSETLSLTCAVSVDSISSGYYWSWIRQPPGKGLEWIGYIHHSGS
TYYNPSLKSRVTMSVDTSKNQFSLKLSSVTAADMAVYYCAT
>V33RF-ABGA01058273.1-ighv |(621, 936)|2.96867205249|(0.987,0.986,0.996)|1
VQCDVQLVESGGGLVQPGGSLRLSCAASGFTFSDYYMSWVHQPPGKGLEWVGLIRNKANG
GTTEYAASVKGRFTISRDDSKSIAYLQMNSLKTEDTAVYYCTR
>V34RF-ABGA01091248.1-trbv |(6357, 6654)|2.23727320632|(0.710,0.932,0.857)|1
HMDAGITQSPRHKITETGTPVTLKCHQTENRRYMYWCRQDLGHGLRLIHYSYGVKDTDKG
EVSDGYSVSRSKTEDFLLTLESATRSQTSVYFCAISE
>V35RF-ABGA01091248.1-trbv |(17274, 17574)|2.32911523626|(0.938,0.708,0.885)|1
LTEAGVAQSPRYKIIEKKQPVAFWCNPISGHNTLYWYRQNLGQGPELLIRYENEEAVDDS
QLPKDRFSAERLKGVDSTLKIQPAELGDSAVYLCASSL
>V36RF-ABGA01091248.1-trbv |(22858, 23158)|1.7037190715|(0.839,0.513,0.738)|1
HTDAGFIQSPRHEVTEMEKEVSLRCKPISGHNSLFWYRQTMMWGLELLIYFNNDTPIDDS
GMPKDQFSATMPNASFSTLKIQPSEPRDSAVYFCASSL
>V37RF-ABGA01091248.1-trbv |(26084, 26375)|1.94163553028|(0.864,0.615,0.741)|1
AGVIQSPQHEVTEMGKEVTLRCKPISGHNSLFWYRQTMMWGLEWLIYFNNKAVIDDSGMP
KDRFSAKMPNESFPTLKIQPSEPRDSAVYFCASSL
>V38RF-ABGA01091248.1-trbv |(29358, 29658)|2.43269226172|(0.942,0.881,0.755)|1
HTDAGVIQSPRHEVTEMGKEVTLRCKPISGHEDLFWYRQTMMQGLELLIYFNNKAVMDDS
GMPKDRFSAKMPNASFSTLKIQPSEPRDSAVYFCASSL
>V39RF-ABGA01091248.1-trbv |(32670, 32961)|2.34033725947|(0.927,0.846,0.733)|1
AGVIQSPRHEVTEMGKEVTLRCKPISGHDYLFWYRQTMMQRLELLIYFNNKAVMDDSGMP
KDRFSAKMPNASFSTLKIQPSEPRDSAVYFCASSL
>V40RF-ABGA01091249.1-trbv |(2283, 2583)|2.21288363947|(0.880,0.947,0.628)|1
LIDAGVTQTPRHKVTEMGQEVTMRCQPILGHNTVFWYRQTMMQGLELLAYFRNQAPLDDS
GMPKDRFSAEMPDATLATLKIQPSEPRDSAVYLCASGL
>V41RF-ABGA01091249.1-trbv |(9220, 9521)|2.44662949093|(0.906,0.905,0.740)|1
AGVTQFPSHSVIEKGQTVTLRCDPISGHDYLYWYRRVMGKEIKFLIYFVRESKQDESSMP
KNRFLAERTGGTYSTLKVQPAELEDSGVYFCASSQVTV
>V42RF-ABGA01091249.1-trbv |(14302, 14599)|2.43540308202|(0.892,0.847,0.766)|1
HGVAMVIQNPRYQVTQFGKPVTLSCSQNLNHNVMYWYQQKSSQAPKLLFHYYDKDFNNEA
DTPDNFQSRRPNTSFCFLDIRSPGLGDAAMYLCATSR
>V43RF-ABGA01091249.1-trbv |(19286, 19586)|2.40419975683|(0.892,0.812,0.777)|1
SPGEEVTQTPKHLVKGEGQEAKLYCAPIKGHSYVFWYQQVLKKEFKFLISFQNENVFDKT
GMPKERFSAKCLPNSPCSLEIQATKLEDSAVYFCASSQ
>V44RF-ABGA01091251.1-trbv |(2217, 2513)|2.10477036267|(0.911,0.770,0.685)|1
LSNAGVTQNPRHLVRRRGQEARLRCSPMKGHSYVYWYRQLPEEGLKFMVYLQKEKIIDES
GMPKERFSAEFPKEGPSILRIQQAVRGDSAAYFCASS
>V45RF-ABGA01091252.1-trbv |(2503, 2800)|2.73999588466|(0.905,0.951,0.893)|1
TVDGGITQSPKYLFRKEGQNVTLSCEQNLNHDAMYWYRQDPGQGLRLIYYSGIVNDFQKG
DIAEGYSVSREKKESFPLTVTSAQKNPTAFYLCASSI
>V46RF-ABGA01091254.1-trbv |(1909, 2215)|1.5922726653|(0.812,0.627,0.539)|1
SGLGAVVSQHPSRVICKSGTSVKIDCRSLDFQATTMFWYRQFPKQSLMLMATSNEGSGVT
YEQGVRKEKFPINHPNLTLSTLTVTSAHPEDSSFYICSAR
>V47RF-ABGA01091256.1-trbv |(1883, 2180)|2.32785503687|(0.904,0.762,0.790)|1
SMDTKVTQRPRLLVKANEQKAKMDCVPIKGHSYVYWYRKKPEEELKFLLYFQNEEIQKAE
IINERFSAQYPKNSSCTLEIQSTETGDMALYFCASSK
>V48RF-ABGA01091257.1-trbv |(2769, 3069)|2.51248400784|(0.892,0.827,0.827)|1
SFHARVTQTPGHLVKGKGQKTKMDCTPEKGHTFVYWYQQNQNKEFMLLISFQNKQVLQET
EMHKKRFSSQCPKNTPCSLATLSSEPGDTALYLCASSQ
>V49RF-ABGA01091257.1-trbv |(13504, 13802)|2.63469983482|(0.888,0.908,0.847)|1
SMDADVTQTPRNRITKTGKRIMLECSQTKGHDGMYWYRQDPGLGLRLIYYSFDVKDINKG
EISDGYSVSRRTQAKFSLSLESATPNQTALYFCATSD
>V50RF-ABGA01091260.1-trbv |(5031, 5328)|2.4723006368|(0.908,0.901,0.754)|1
LMEADIYQTPRHLVIGTGKKITLECSQTMGHDKMYWYQQDPGMELHLIHYSYGVNSTEKG
DLSSESTVSRIRMEHFPLTLESARPSHTSQYLCASSE
>V51RF-ABGA01091263.1-trbv |(8280, 8583)|2.45686734764|(0.863,0.792,0.827)|1
SVFSAVVSQKPSRDICQRGTSLTIQCQVDSQVTMMFWYRQQPGQSLTLIATANQGSEATY
ESGFVIDKFPISRPNLTFSTLTVSNMSPEDSGIYLCSVE
>V52RF-ABGA01099934.1-ighv |(8362, 8671)|2.48363205963|(0.981,0.906,0.775)|1
VLSQVQLQESGPGLVKPSETLSLTCAVSGGSISSGYYWGWIRQPPGKGLEWIGHINYGGS
TSYNPSLKSRVTLSVDTSKNQFSLKLSSVTAADTAVYYCAR
>V53RF-ABGA01099934.1-ighv |(21569, 21878)|2.58843310718|(0.830,0.887,0.909)|1
AHSHVQLVQSGDEVRKPGASVKVSCKASGYTFTNHNMDWVRQAPGQGFEWMGGINTNTGG
TSYAQTFQGRVIMTRDTSTNTAFMELSSLRSEDMTVYYCAR
>V54RF-ABGA01099935.1-ighv |(7135, 7459)|2.23540849124|(0.795,0.859,0.664)|1
AHSQVQLVQSEPEMKQPGASVKFSCKATGYTFTSYVMNWVRQAPGQGLEWVGWINTNTGN
PMYAQGFTGQFVFSMDTSVSTVYLQISSLKAEDMAVYYCLRDTVWK
>V55RF-ABGA01099938.1-ighv |(2861, 3183)|2.58022903169|(0.824,0.880,0.958)|1
VLSQVTLKESGPALVKPTETLTLTCTVSGFSLSNSKMGVSWIRQPPGKALEWLAHIFSND
EKSYSTSLKSRLTISKDTSKSQVVLTMTNMDPVDTATYYCTRRAQ
>V56RF-ABGA01099940.1-ighv |(16077, 16386)|2.90476452501|(0.969,0.993,0.947)|1
AHAEVQLVQSGAEVKKPGASVKFSCKVSGYTFTELSMHWVRQAPGKGLEWMGGFDPDDGE
TIYAQKFQGRVTMTEDTSTDTAYMELSSLRSEDTAMYYCAT
>V57RF-ABGA01099941.1-ighv |(996, 1308)|2.94516889635|(0.981,0.968,0.998)|1
VQCEVQLVESGGGLVQPGGSLRLSCAASGFTFTNYYLHWFRQAPGKGLEWVAYISSGSGG
STNYPDSVKGRFTISRDNAKNTLYLQMNSLRAEDTAVYYCAR
>V58RF-ABGA01099941.1-ighv |(12097, 12412)|2.84061113875|(0.975,0.998,0.895)|1
VQCEVQLVESGGGLVQPGGSLRLSCAASGFTFSNYYMHWVRQAPGKGLEWVGFIRTEAKG
GTTEYAASVKGRFTISRDDSKSIAYLQTNSLKTEDTAVYYCTR
>V59RF-ABGA01099945.1-ighv |(5584, 5899)|2.85878326128|(0.985,0.924,0.966)|1
VQCEVQLVESGGGLVQPGGSLRLSCAASGFTFSNAWLSWVRQAPGKGLEWVGRIKSKADG
GTTDYAAPVKGRFTISRDDSKNTLYLQMNSLKTEDTAVYYCAT
>V60RF-ABGA01099946.1-ighv |(22626, 22932)|2.96494028297|(0.981,0.993,0.992)|1
VQCEVQLVESGGGLVQPGGSLRLSCAASGFTVSSYDMHWVRQAPGKGLEWVSAIDTDGDT
YYADSVKGRFTISRENAKNSLYLQMNSLRAKDTAVYYCAR
>V61RF-ABGA01099946.1-ighv |(36315, 36622)|2.95444887221|(0.994,0.986,0.976)|1
VQCEVQLVESGGGLVQPGRSLRLSCAASGITFSNQYMSWVRQATGKGLEWVSYISGDSSY
TSYADSVKGRFTISRDNAKNSLYLQMNSLRVEDTAVYYCV
>V62RF-ABGA01099947.1-ighv |(19776, 20085)|2.93471942965|(0.983,0.997,0.958)|1
VQCEVQLVESGGGLVQPGGSLRLSCAASGFTFSSYSMSWVRQAPGKGLEWVSAISGSGSS
TYYPDSVKGRFTISRDNAKNTLYLQMNSLRAEDMAVYYCVR
>V63RF-ABGA01099948.1-ighv |(6262, 6577)|2.87509784876|(0.959,0.998,0.928)|1
VQCEVQLVESGGGLVQPGGSLRLSCAASGFTFSNYYMHWVRQAPGKGLEWVGFIASKAYG
GTTEYAASVKGRFTISRDDSKSIVYLQMNSLKTEGTAVYYCTR
>V64RF-ABGA01099955.1-ighv |(3483, 3787)|2.6839323443|(0.885,0.982,0.857)|1
CAEVQLVQSGAEVKRPGESLRISCKGSGYSFTSYWISWVRQMPGKGLELMGIIDPSDSDT
RYSPSFQGHITISADKSISTAYLQWTSLKASDTAMYYCA
>V65RF-ABGA01099956.1-ighv |(15185, 15494)|2.92682484549|(0.994,0.988,0.952)|1
VQCEVQLVESGGGLVQPGGSLRLSCAASGFTFSSYAMYWVRQAPGKGLEWVSAINSGGGS
TYYADSVKGRFTISRENAKNTLYLQMSSLRAEDTAVYYCAK
>V66RF-ABGA01104800.1-ighv |(1132, 1438)|2.91210292772|(0.991,0.986,0.944)|1
VLSQVQLQESGPGLVKPSETLSLTCAVSGGSISGYSWSWIRQPPGKGLEWIGSIHSSGST
YYNPSLKSRVTISADTSKNQFSLKLSSVTAADTAVYYCAR
>V67RF-ABGA01104801.1-ighv |(6863, 7169)|2.68464035149|(0.984,0.994,0.815)|1
VLSQVQLQESGPGLVKPSETLSLTCAVSGGSISSYYWSWIRQPPGKGLEWIGYIHSSGST
NSNPSLKSRVTMSVDTSKNQFSLKLSSVTAADTAVYYCAR
>V68RF-ABGA01129113.1-trbv |(1435, 1735)|2.51355900853|(0.902,0.907,0.771)|1
HTGAGVSQSPRYKVAKRGQDVALRCDSIFGHVTFYWYQQTLGQGPEVLTYFRSDAQRDKS
GLPSGRFSAERPEGSVSTMKIQHTEQGDSAVYLCASSL
>V69RF-ABGA01154382.1-igkv |(15548, 15866)|2.57724907731|(0.973,0.770,0.987)|1
AYGDIVMTQSPDSLAVSLGERITINCKSSQSVLYSSNNKNYLAWYQQKPGQAPKLLIYWA
STRQSGVPDRFSGSGSGTDFTFTISSLQAEDVAVYYCQQSYSAP
>V70RF-ABGA01154383.1-igkv |(2962, 3250)|2.5280762475|(0.855,0.792,0.908)|1
TTLTQSPAFVSATPGDKVTISCKASQDIDDDMNWYQQKPGEAAIFIIQEATTLISGIPPR
FSGSGYGTDFTLTINNIESEDAAYYFCLQHDNFP
>V71RF-ABGA01154588.1-trav |(5719, 6028)|2.23988755184|(0.876,0.911,0.647)|1
TIMYLVIGTAGQSLEQPSEVTAVEGAIVQINCTYQTSGFYGLSWYQQHDGGAPTFLSYST
LDGLEERGHFSSFLSRSDSYGYLLLQELQMKDSASYFCAVR
>V72RF-ABGA01173923.1-trav |(666, 979)|2.21105531838|(0.858,0.884,0.642)|1
TTGQNIDQPTEITAMEGAIVQINCTYQTSGFNGLFWYQQHAREAPTFLSYNVLDGLDEKG
HVSSFLSRSKGYSYLLLKELQMKDSASYLCAVRDTVTMRSLW
>V73RF-ABGA01174988.1-ighv |(27125, 27434)|2.90558443703|(0.985,0.945,0.982)|1
VQCEVQLVESGGGLVQSRGSLRLSCAASGFTFSSCGMNWVRQAPGKGLEWVAVIWYDGSN
KYYADSVKGRFTISRDNSKNMLYLQMNSLRVEDTAVYYCAK
>V74RF-ABGA01174988.1-ighv |(37690, 37999)|2.13265219606|(0.931,0.912,0.617)|1
VLSQVQLQESGPGLVKPSETLSLTCAVSGDSLSSGYYWSWIRQPPGKGLEWIGYIHHSGS
TYYNPSLKSRVTMSVDTPKNQFSLKLSSVTAADTAVYYCER
>V75RF-ABGA01174994.1-ighv |(8215, 8524)|2.60522551866|(0.927,0.964,0.791)|1
AQSQVQLVQSGAEVKKPGASVKVSCKASGYTFTNYYMQWVQQAPGQGLEWMREFNTRNGN
TQYIQEFQGRVTITRDTSTSTAYMELSSLRSEDTAVYYCVR
>V76RF-ABGA01174994.1-ighv |(20953, 21275)|2.12230157498|(0.884,0.589,0.978)|1
VLSQVTLKESGPALVKPTETLMLTCTVSGLSLSTSGMGMSWIRQPPGKALEWPAHIFLND
KNSYSTSLKNRLTISKDTSKSQVVVTMTNMDPVDTATYYCAWRAQ
>V77RF-ABGA01174995.1-ighv |(11362, 11671)|2.50014215838|(0.974,0.791,0.889)|1
AHAKVQLVQSGAEVKKPGASVKVSCKVSGYTLTRLSMHWVRQAPRKGLEWMGGFYPVDGE
TIYAQKFQGRVTMTEDTSTDTAYMEISSLRSEDTAVYYCAT
>V78RF-ABGA01174999.1-ighv |(1443, 1758)|2.9834040992|(0.989,0.999,0.996)|1
VQCEVQLVESGGGLVQPGGSLRLSCAASGFTFSDYYMSWVHQPPGKGLEWVGLIRNKANG
GTTEYAASVKGRFTISRDDSKSIAYLQMNSLKTEDTAVYYCTR
>V79RF-ABGA01174999.1-ighv |(24157, 24466)|2.58270509503|(0.961,0.960,0.782)|1
VQCEVQLVESGGGLVQAGESLRLSCAASGFTFSSYRMNWVRQAPGKGLEWVSYISSDSSY
IYYADSVKVRFTISGDNAKNSMYLQMNNLRAKDTPVYYCVK
>V80RF-ABGA01194059.1-ighv |(3549, 3864)|2.94462999772|(0.967,1.000,0.983)|1
VQCEVQLVESGGGLVQPGGSLRLSCAASGFTFSNHYMQWVRQAPGKGLEWVGLIRNKADG
ETTDYAASVKGRVTISRDDSKSITYLQMSSLKTEDSAVYYCAR
>V81RF-ABGA01194061.1-ighv |(27102, 27416)|1.99075898006|(0.809,0.572,0.811)|1
VFSQVTLKESGPALVKPTQTLTLTCTFSGFSLSTSGMGVGWIHQPPRKALEWLALIYWDD
DKRYSPSLKSRLTISKDTSKNQVVLTMTNMDPVDTATYYCARR
>V82RF-ABGA01194062.1-ighv |(111, 425)|2.07249055573|(0.832,0.612,0.807)|1
VFSQVTLKESGPALVKPTQTLTLTCTFSGFSLSTSGMGVGWIRQPPRKALEWLAVIYWDD
DKRYSPSLKSRLTISKDTSKNQVVLTMTNMDPVDTATYYCARR
>V83RF-ABGA01194064.1-ighv |(10045, 10354)|2.62019108561|(0.946,0.914,0.823)|1
VLSQVQLQESGPGLVKPLETLSLTCAVSGGSISSSNWWSWVRQPPGKGLEWIGEIYQSGS
TNYNPSLKSRVTISVDKSKNQFSLKLSSVTAADTAVYYCAR
>V84RF-ABGA01197604.1-igkv |(7602, 7920)|2.13934862745|(0.973,0.618,0.947)|1
SSGDIVMTQTPLSLPVTPGEPASISCRSSESLLDTDDEYTYLNWYLQKPGQSPQLLIYEV
SSQASGVPDRFSGSGSGTDFTLKISRVEAEDVGVYYCMQALQTP
>V85RF-ABGA01198108.1-igkv |(6191, 6491)|2.86132527582|(0.949,0.931,0.989)|1
ARCDIQMTQSPTSLSASIGDSVTSTCQASQSISNELAWYQQKPGKVPKLLIYRVSSLQMG
IPSRFSGSGSGTDFTLTITSLQPDDVATYYCQQEYSYP
>V86RF-ABGA01224584.1-trbv |(1799, 2096)|2.40614044178|(0.889,0.892,0.726)|1
LVDMKVTQSSRYLVKRMGEKVFLECVQDMDHERMFWYRQDPGLGLRLIYFSYDVKMKEQG
DVPEGYSVSREKKGHFSLILESASTNQTSMYLCASSL
>V87RF-ABGA01239557.1-trav |(769, 1061)|1.55672981978|(0.499,0.709,0.778)|1
TLIDAKTTQPTSMDCTEGRAANLPCNHSTISGNEYVYWFRQIHSQGPQYLIHGLKNSETN
EMASLIITEDRKSSTLILPHATLRDTAVYYCIVRV
>V88RF-ABGA01243343.1-ighv |(9466, 9772)|2.58610019321|(0.891,0.797,0.944)|1
VLSQVQLQQWGAGLVKPSETLSLTCAVYGGSFSDYGWNWIRQPPGKGLEWIGYIVSSGRT
NYNPSLKSRVTMSVDTSKNQFSLKLSSVTAADTAVYYCAR
>V89RF-ABGA01243345.1-ighv |(15320, 15629)|2.98574403277|(0.998,0.998,0.990)|1
VQCEVQLVESGGGLVQPGGSLRLSCAASGFTFSSYGMHWVRQAPGKGLEWVAVIWYDGSN
KYYADSVKGRFTISRDNSKNTLYLQMNSLRVEDTAVYYCAK
>V90RF-ABGA01270863.1-ighv |(174, 468)|2.1789586814|(0.874,0.611,0.978)|1
GGVGGGLVQPGGSLRLSCAASGFTFSNHYMQWVRQAPGKGLEWVGLIRNKADGETTDYAA
SVKGRVTISRDDSKSITYLQMSSLKTEDSAVYYCAR
>V91RF-ABGA01276890.1-trbv |(7515, 7815)|2.41657947461|(0.935,0.911,0.729)|1
LTEAGVAQSPRYKIIEKRQSVAFWCNPISGHATLYWYQQILGQGPKLLIQFQNDGVVDDS
QLPKDRFSAERLKGVDSTLKIQPANLGDSAVYLCASSL
>V92RF-ABGA01280669.1-iglv |(7470, 7780)|2.25255727735|(0.924,0.754,0.772)|1
SLSQPVQTQPSSHSACSGASARLTCTLSSGFSVGDFWISWYQQKPGNPPRYLLYYHSDSD
KGQGSGVPSRFSGSNDASANAGILRISGLQPKDEADYYCGT
>V93RF-ABGA01285645.1-igkv |(2124, 2410)|2.71819778573|(0.937,0.856,0.952)|1
IVMMQSPATLSVSPGERGTISCRASQSVSNYLAWYQQKPGQSPRLLIYRASNRATGIPAR
FSGSGSGTDFTLTISSVELEDFAVYYCQQYNAG
>V94RF-ABGA01285648.1-igkv |(32619, 32919)|2.97528017622|(0.994,0.982,1.000)|1
ARCDIQMTQSPSSVSASVGDRVTITCRASQGISSALAWYQQKPGKPAKLLIYAASSLQSG
VPSRFSGSGSGTDYTLTISSLQPEDFATYYCQQYNSVP
>V95RF-ABGA01285649.1-igkv |(12602, 12902)|2.76311525692|(0.962,0.961,0.872)|1
ARCDIQMTQSPSSLSASVGDRVTITCRASQGISDDLAWHQQKPGKAPKLLIYAASSLQSG
VPSRFSGSESGTEFTLTISSLQPEDFATYYCQQYNSYP
>V96RF-ABGA01285651.1-igkv |(14331, 14619)|2.11502037966|(0.981,0.960,0.606)|1
IVMTQSPATLSLSPGERATISCRASQSVSNYLAWYQQKPGQAPRLLIHSASTRATGIPAR
FSGSGSGTDFTLTISSLEPEDFAVYYCQQGNNLP
>V97RF-ABGA01290070.1-igkv |(266, 566)|2.52139078509|(0.987,0.797,0.901)|1
TTGEVVLTQSPATLSLSPGERATLSCRASQSVSNYLAWYQQKPGQAPRLLIYDASNRATG
IPARFSGSGSGTDFTLTISSLEPEDFAVYYCQQRSNLP
>V98RF-ABGA01290201.1-trgv |(6850, 7160)|2.19848385778|(0.918,0.712,0.789)|1
SQISSNLEGRTKSVTGPTGSSAEITCDLPGASTLYIHWYLYQEGKAPQRLLYYEPYYFRV
VLESGITPGKYDTGSTRSSWNLRLQNLIENDSGVYYCATWD
>V99RF-ABGA01290201.1-trgv |(11173, 11486)|2.51699862631|(0.933,0.806,0.861)|1
SQKSSNLEGRTKSVTRPTGSSAEITCDLPGESTVYIHWYLHQEGKAPQRLLYYDSYNSRV
VLESGISPGKYDTYGSTRKNLRLILRNLIENDSGVYYCAIWD
>V100RF-ABGA01290201.1-trgv |(15529, 15842)|2.53720731855|(0.969,0.877,0.815)|1
SQKSSNLEGGTKSVTRPTRSSAEITCDLTVTNAFYIHWYLHQEGKAPQRLLYYDVSNSRD
VLESGLGPGKYYTHTPRWWSWILILRNLIENDSGVYYCATWY
>V101RF-ABGA01290202.1-trgv |(2218, 2531)|2.62702591492|(0.971,0.877,0.861)|1
SQKSSNLEGGTKSVTRPTRSSAEITCDLTVTNAFYIHWYLHQEGKAPQRLLYYDVSTARD
VLESGLSPGKYYTHTPRRWSWILRLQNLIENDSGVYYCATWD
>V102RF-ABGA01290204.1-trgv |(7449, 7762)|2.18437860177|(0.932,0.703,0.803)|1
SQKSSNLEGRTKSVTRPTGSLAVITCDLPVEDAAYIHWYLHQEGKAPQRLLYYDVSTSKV
VLESGISPGKYQTYASTRRSFRFILENLIEHDSGVYYCATWD
>V103RF-ABGA01297342.1-iglv |(5546, 5856)|2.41872728789|(0.875,0.733,0.889)|1
SLSQPVPTEPSSHSASSGASARLTCTLSSGFSVGDFWISWYQQKPGNPPRYLLYYHSDSD
KGQGSGVPSRFSGSNDASANAGILRISGLQPEDEADYYCGT
>V104RF-ABGA01301078.1-trbv |(8868, 9168)|2.71076093375|(0.940,0.930,0.864)|1
HTGAGVSQSPRYKVTKRGQDVALRCDPISGHDYLYWYQQALGQGPEFLTYFQNDVQLDKS
GMPSDRFSAEGLEGSISTLKIQRTEQGDSAVYLCASSL
>V105RF-ABGA01301081.1-trbv |(710, 1000)|2.10055962926|(0.923,0.764,0.696)|1
ETGVTQSPTYLIKTRGQQVTLRCSPISGHKSVSWYQQALGQGPQFIFQYYREEENGRGNF
PRRFSGHQFLNHSSELNVNALELEDSALYLCASSL
>V106RF-ABGA01301082.1-trbv |(3712, 4002)|2.01610164196|(0.905,0.764,0.651)|1
ETGVTQSPTYLIKTRGQQVTLRCSPISGHKSVSWYQQALGQGPQFIFQYYREEENGRGNF
PHRFSGHQFLNHTSELNVNALELDDSALYLCASSL
>V107RF-ABGA01301083.1-trbv |(1589, 1880)|2.81073453214|(0.966,0.951,0.908)|1
NAGVTQTPKFRILKTGQSMTLQCAQDMNHNYMYWYRRDPGMGLKLIYYLVAAGTTDKGEV
PDGYSVSRSTTEDFPLTLESAAPSQTSVYFCASSY
>V108RF-ABGA01301086.1-trbv |(3670, 3966)|2.73035827888|(0.954,0.869,0.937)|1
PVDAGVTQSPTHLIKTRGQQVTLRCSPISGHKSVSWYQQALGQGPQFIFEYYEKEERGRG
NFPDRFSARQFPNYSSELNVNALLLGDSALYLCASSL
>V109RF-ABGA01301086.1-trbv |(10960, 11257)|2.5209619193|(0.956,0.808,0.870)|1
PMNAGVTQTPKFQVLKTGQSMTLQCAQDMNHDYMSWYRQDPGIGLRLIHYSVAAGITEKG
ETPSGYNVSRSNTEDFPLRLESAAPSQTSVYFCASSY
>V110RF-ABGA01301086.1-trbv |(15590, 15890)|2.52361758657|(0.844,0.858,0.824)|1
HTGAGVSQSPRYKVTKRGQDVALRCDPISGHVSLFWYQQALGQGPELLTYFQNEVQLHKS
GLPSDRFFAERPEGSICTLKIQRTQQEDSAMYLCASSL
>V111RF-ABGA01313761.1-ighv |(1090, 1396)|2.97591252616|(0.999,0.995,0.983)|1
VLSQVQLQESGPGLVKPSETLSLTCAVSGGSISGYYWSWIRQPPGKGLEWIGYIYSSGST
NYNPSLKSRVTVSVDTSKNQFSLKLSSVTAADTAVYYCAR
>V112RF-ABGA01313761.1-ighv |(5857, 6178)|1.54423701555|(0.577,0.509,0.500)|1
KVAFTHSCVLSTGAHSQVQLGQSGPEVKKPGSSVKVSCKASGYTFTSSAMQWVRQSPGEG
LEWIGWIIVGSGNTNYAQKFQGRVTITRDMSTSTAYMELSSLRSE
>V113RF-ABGA01313763.1-ighv |(465, 774)|2.8066448876|(0.955,0.913,0.946)|1
AHSQVQLGQSGPQVKKPESSVKVSCKASGYTFTSSAMQWVRQAPGQGLEWIGWIIVGSGN
TNYAQKFQGRVTITRDTSTSTAYMELSSLRSEDTAVYYCAA
>V114RF-ABGA01313764.1-ighv |(1353, 1662)|2.75234458128|(0.986,0.863,0.964)|1
VLSQVQLQESGPGLVKPSETLSLTCAVSGGSISSSYYWGWIRQPTGKGLEWIGHIYSSGS
TYYNPSLKSRVTISVDTSKNQFSLKLSSVTAEDTAVYYCAR
>V115RF-ABGA01318850.1-igkv |(776, 1076)|2.95164947362|(0.996,0.963,0.997)|1
SRCDIQMTQSPSSVSASVGDRVTITCQASQGVSNALAWYQQKPGKTPKLLIYDATTLQSG
VPSRFSGSGSGTDYTLTISSLQPEDFATYYCQQYNSYP
>V116RF-ABGA01321050.1-trdv |(10390, 10696)|1.94088045338|(0.730,0.662,0.617)|1
RGMLCDKVTQSSPDQTVASGSEVVLLCTYDTVYSNPDLFWYRIRPDYSFQFVFYGDNSGS
QAADFTQGRFSVKHIPTQKAFHLVISPLRTEDSATYYCAF
>V117RF-ABGA01321409.1-igkv |(1894, 2185)|2.96485291224|(0.998,0.970,1.000)|1
DIQMTQSPSSVSASVGDRVTITCRASQSISSWLAWYQQKPGKAPKLLIYKASNLQSGVPS
RFSGSGSGTDFTLTISSLQPEDFATYYCQQYSSTP
>V118RF-ABGA01321410.1-igkv |(12114, 12400)|2.7912557322|(0.992,0.967,0.882)|1
IVMTQSPATLSVSPGERGTISCRASQSVSNYLAWYQQKPGQSPRLLIYRASNRATGIPAR
FSGSGSGTDFTLTISSVEPEDFAVYYCQQYNTG
>V119RF-ABGA01335280.1-iglv |(1203, 1509)|2.66227371523|(0.850,0.927,0.942)|1
DSQTVVTQEPSFSVSPGGTVTLTCGLSSGSVSTSYYPSWYQQTPGQALRMLIYSTNTRTS
GVPDCFSGSILGNKAALTITGAQADDESDYYCVLYMGSGI
>V120RF-ABGA01342015.1-igkv |(1575, 1875)|2.9373410539|(0.999,0.984,0.961)|1
TRCDIQMTQSPSSLSASVGDRVTITCRASQSISNYLAWYQQKPGKVPKLLIYAASTLQSG
VPSRFSGSGSGTDFTLTISSLQPEDVATYYCQKHNSAP
>V121RF-ABGA01356721.1-igkv |(4236, 4536)|2.99180001921|(1.000,0.993,0.999)|1
SRCDIQMTQSPSSLSASVGDRVTITCRASQSISSWLAWYQQKPGKAPKLLIYAASSLQSG
VPSRFSGSGSGTDFTLTISSLQPEDFATYYCQQHNSYP
>V122RF-ABGA01356722.1-igkv |(4085, 4385)|2.48227810233|(0.966,0.729,0.991)|1
SRCDIQMTQPPSSMSAYVGDRVTVNCQASQGISSWLAWYQQKPGKAPKLLIYKASSLQSG
VPSRFSGSGSGTDYTLTISSLRPEDFATYYCQQANGVP
>V123RF-ABGA01356724.1-igkv |(802, 1093)|2.9869000027|(0.998,0.994,0.995)|1
DIQMTQSPSSVSASVGDRVTITCRASQGISNYLNWYQQKPGKAPKLLIYAASSLQSGVPS
RFSGSGSGTDFTLTISSLQPEDFATYYCQHFNSYP
>V124RF-ABGA01356726.1-igkv |(7542, 7842)|2.84316854597|(0.995,0.897,0.989)|1
TTGEIVLTQSPATLSLSPGERATVSCRASQSVSNYLAWYQQKPGQSPRLLIYDASNRATG
IPARFSGSGSGTDFTLTISSLEPEDFAVYYCQQYNNQT
>V125RF-ABGA01356729.1-igkv |(273, 573)|2.95910611876|(1.000,0.980,0.982)|1
ARCDIQMTQSPSSVSASVGDRVTITCRASQGISSYLAWYQQKPGKAPKLLIYAASSLQSG
VPSRFSGSGSGTEFTLTISSLQPEDFATYYCMQHNSYP
>V126RF-ABGA01362157.1-ighv |(1861, 2165)|2.73262047425|(0.885,0.982,0.904)|1
CAEVQLVQSGAEVKRPGESLRISCKGSGYSFTSYWISWVRQMPGKGLELMGMIDPSDSDT
RYSQSFQGHITISADKSISTAYLQWTSLKASDTAMYYCA
>V127RF-ABGA01378070.1-trbv |(11166, 11457)|2.01909139009|(0.690,0.634,0.709)|1
LMEADIYQTPRHRVIRTGKKITLECSQTMGHDKRYWSRSRNGITPHPLFLWVNSTEKGDL
SSESTVSRIRIQHFPLTLESASPSHTSQYLCASSE
>V128RF-ABGA01384193.1-ighv |(10967, 11276)|2.9643601679|(0.991,0.995,0.979)|1
VQCEVQLVESGGGLVQPGGSLRLSCAASGFTFSSYGMNWVRQAPGKGLEWVSYISGDSSY
INYADSVKGRFTISRDNAKNSLYLRMNSLRAEDTAVYYCVK
>V129RF-ABGA01386446.1-trav |(520, 807)|2.81964192834|(0.923,0.961,0.943)|1
VNSQQGEEDPQALSIQEGENATMNCSYKTSINNLQWYRQNSGRGLVHLILIRSNEREKHS
GRLRVTLDTSKKSSSLLITASRAADTASYFCATD
>V130RF-ABGA01386446.1-trav |(6159, 6450)|2.55289032028|(0.817,0.914,0.870)|1
RTNGDPVTQTEGPVTLPERAALTLNCTYQSSYSAFLFWYVQYLNKEPELLLRSSENQETD
SRGFQASHVKSDSSFHLEKPSVQLSDSAVYYCVLR
>V131RF-ABGA01386446.1-trdv |(9538, 9841)|2.13575541656|(0.771,0.754,0.660)|1
SSMAQKVTQAQAAISVVEKEEVTLDCVYETRDATYYLFWYKQPSSGELVFLIRQNSFNEQ
NEVNGRYSWNFQKSTSSFNLTITASQVMDSAVYFCALSE
>V132RF-ABGA01386449.1-trav |(5636, 5936)|1.66265247074|(0.656,0.548,0.549)|1
LSGEDQEKSPEALRLQEGESSSLNCSYTVSGLRGLFWYRQDPGKGPELLFFLYSAGEEKE
KERLKATLTKKESFLHITAPKPEDSATYLCAVQARCSP
>V133RF-ABGA01386453.1-trav |(7857, 8156)|2.05209416124|(0.718,0.614,0.937)|1
VSSKQEVTQIPGALSVPEGENLVLNCSFTDSAIYNLRWFRQDPGKGLTSLLFIQSSQREQ
TSGRLNASLDKSSGRSTLSIAASQPGDSATYLCAVRHS
>V134RF-ABGA01387831.1-trav |(4904, 5207)|2.47735577262|(0.891,0.738,0.953)|1
PGIAQKITQTLPAMFVQEKEAVTLDCTYDTSDQSYGLFWYKQPSSGEMILLIYQGSYDKQ
NATEGRYSLNFQKARKSANLVISASQLGDSAMYFCAMKE
>V135RF-ABGA01387833.1-trav |(6325, 6619)|2.62360011823|(0.851,0.893,0.894)|1
RTHGDSVTQMEGPVTLSEEAFLTINCTYTATGYPSLFWYVQYPGEGLQLLLKATKADDKG
SNKGFEATYHKETTSFHLEKDSVRESDSGVYFCALS
>V136RF-ABGA01387833.1-trav |(37695, 37988)|2.6716747016|(0.870,0.873,0.962)|1
VWCQQKEVEQNPGPLSVPEGAIASLNCTYSNSAFQYFMWYRQYSRKGPELLIYIYSSGNK
QDGRFTAQVDTSGKYMSLFIRDSQPSDSATYLCAMS
>V137RF-ABGA01394059.1-igkv |(7736, 8051)|2.18008892231|(0.977,0.773,0.758)|1
SSGDIVMTQSPLSLPVTPGEPASISCRSSQSLLHSNRYNYLNWYLQKPGQSPQLLIYLGS
NRASRVPDRFSGSGSGTDFTLKISRVEAEDVGVYYCTQTLQTP
>V138RF-ABGA01394062.1-igkv |(9765, 10067)|2.70425564014|(0.977,0.826,0.989)|1
SSAEIVMTQTPLSLSITPGEPASISCRSSQSLLHSDGNTYLHWYLQKPGQPPQLLIYEVS
NRFSGVPDRFSGSGSGTDFTLKISRVEAEDVGVYYCMQD
>V139RF-ABGA01394064.1-igkv |(17826, 18124)|1.8961660368|(0.981,0.509,0.997)|1
SRGEIVLTQSPAFRSETLKEKVTITCRASQSIGSRLHWYQQKPDQSPKLLIKYASQSISG
VPSRFSGSGSGTDFTLTINSLEAEDAATYYCQQGSSL
>V140RF-ABGA01394066.1-igkv |(10063, 10356)|2.57230521572|(0.971,0.831,0.879)|1
TTGEIVLTQSPATLSLSPGERATLSCRASQSVSNYLAWYQQKPGQVPRLLIYRASNRTTG
IPDRFSGSGSGTDFTLTISRLDPEDFAVYYCQQYGS
>V141RF-ABGA01394066.1-igkv |(40656, 40948)|2.18498424581|(0.990,0.621,0.994)|1
SRGDIVMTQSPAFLSVTPVEKVTITCQASEGISNYLNWYQQKPDQAPKLLIKYASQSISG
VPSRFSGSGSGTDFTFTISSLEAEDAATYYCQQGN
>V142RF-ABGA01394068.1-igkv |(3664, 3964)|2.99186400565|(1.000,0.995,0.997)|1
SRCDIQMTQSPSSVSASVGDRVTITCRASQGISNYLAWYQQKPGKAPKLLIYYASSLQSG
VPSRFSGSGSGTDYTLTISSLQPEDFATYYCQQYNSYP
>V143RF-ABGA01394071.1-igkv |(1743, 2043)|2.95791054075|(0.974,0.991,0.996)|1
SRCDIQMTQSPSSLSASVGDRVTITCQASQGISNALAWYQQKPGKTTKLLIYRASSLQSG
VPSSFSGSGSGTDFTLTISSLQPEDFATYYCQQYYSDP
>V144RF-ABGA01394075.1-igkv |(3782, 4082)|2.55380968298|(0.989,0.844,0.863)|1
TTGEIVMTQSPATLSLSPRERATISCRASQSVSSNLAWYQQKPGQAPRLLIYGASNRATG
IPARFSGSGSGTDFTLTISSLEPEDFAVYYCQQYNNWP
>V145RF-ABGA01047585.1-trbv |(3005, 3305)|2.37744063091|(0.821,0.775,0.793)|-1
CFHAKVTQTPGYLVKGKGKKTKMYCTPEKGHTFVCWYQQNQNKEFMFLISFQNEQVLQET
EMHKKRFSSRCPKNPPCSLAILSLEPGDTALYLCASSP
>V146RF-ABGA01052527.1-trbv |(437, 737)|2.32458257875|(0.803,0.724,0.824)|-1
CFHAKVTQTPGYLVKGKGRKTKMYCTPAKGHTFVCWYQQNQNKEFMFLISFQNEQVLQET
EMHKKRFSSQCPKNPPCSLAILSLEPGDTALYLCASSP
>V147RF-ABGA01061552.1-trav |(1941, 2240)|2.05999050292|(0.839,0.761,0.636)|-1
VNGQQVMQIPQCQHVQEGEDFTTYCNSSIALSNIQWYKQRPGGHPVFLIQLVKSGEVKKQ
KRLTFQFGEAKKNSSLHITATQTTDVGTYFCAGHSAPQ
>V148RF-ABGA01061554.1-trav |(7774, 8077)|2.02613143265|(0.724,0.628,0.711)|-1
SSVAQQVTQAQSSVSMPVGKAVTLNCLYETSWWWSYYIFWYKQPPSKEMIFLIRQGSGEQ
NAKNGRYSVTFKEAAKSIALTISALQLEDSAKYFCAVWE
>V149RF-ABGA01061560.1-trav |(5881, 6184)|1.59860862109|(0.728,0.583,0.523)|-1
IQVEQSPPGLILQEGANSTLRCNFSATVNNLQWFHQNPWGQLINLFYIPSGTKQNGRLSA
TTVTTERYSLLYISFSQTTDSGVYFCAVEPQCSPGTCSL
>V150RF-ABGA01083932.1-trav |(371, 664)|2.62748244609|(0.930,0.845,0.888)|-1
VSRGESVRPHLSTLGVQEGDNSVINCAYSDSASDYFIWYKQESGKGPQFIIDIRSNMDKR
QGQRVTVLLNKTVKHLSLQIAATQPGDSAVYFCAEN
>V151RF-ABGA01083934.1-trav |(495, 792)|2.64827515488|(0.959,0.877,0.870)|-1
GTRAQSVTQLDSHVSVSEGALVLLRCNYSSSVSPYLFWYVQYPNQGLQLLLKYTSGTTLV
KGINGFEAEFKKSETSFHLTKPSAHVSDTAQYFCAVS
>V152RF-ABGA01083937.1-trav |(4214, 4504)|2.82183763492|(0.931,0.941,0.952)|-1
VNGENVEQHPSTLSVQEGDSSVIKCTYSDSASNYFPWYKQEVGKGPQFIIDIRSNMGEKK
DQRITVILNKTAKHFSLHITETQPGDSAVYFCAAS
>V153RF-ABGA01083938.1-trav |(4846, 5150)|2.04327677967|(0.873,0.657,0.746)|-1
TARAQSVTQPDIHITVSEGTSLELRCNYSYGATPSLFWYVQFPGQGLQLLLKYFSGETLV
QGIKSFEAEFKRSQSSFNLRKSSVHWSDAAEYFCAAGGA
>V154RF-ABGA01083939.1-trav |(4457, 4751)|2.89539396717|(0.983,0.991,0.932)|-1
GINGDSVVQTEGQVLLSEGDSLIVNCSYETTQYPSLFWYVQYPGEGPQLLLKAMKANDKG
RNKGFEATYRKETTSFHLEKDSVQESDSAVYFCALS
>V155RF-ABGA01083939.1-trav |(18067, 18360)|2.66212655271|(0.856,0.893,0.965)|-1
GSGKNQVEQSPQSLIILEGKNCTLQCNYTVSPFSNLRWYKQDTGRGPVSLTIMTFSENTK
SNGRYTATLDADTKQSSLHITASQLSDSASYICVVS
>V156RF-ABGA01083939.1-trav |(34050, 34338)|2.65887407967|(0.919,0.827,0.950)|-1
VWSQQKEVEQDPGPFNVPEGATVAFNCTYSNSASQSFFWYRQDCRKEPKLLMSVYSSGNE
NGRFTAQLNRASQYISLLIRDSQLSDSATYLCAV
>V157RF-ABGA01083939.1-trav |(39521, 39818)|2.41693970605|(0.910,0.783,0.819)|-1
GTRAQSVTQLDSHVPVSEGTRVLLRCNYSSSYSPSLFWYVQHPNQGLQLLLKYLSGPTLV
KGINGFEAEFKKSETSFHLTKSSAHVSDAAEYFCAMS
>V158RF-ABGA01113129.1-trav |(4972, 5260)|2.62487617092|(0.882,0.832,0.930)|-1
VKSQKIEQNSEALNIQEGKTATLTCNYTNYSPTYLQWYRQDPGRGPVFLLLIRENEKEKR
KERLKVSFDTTLKQSLFHITASQPADSATYFCAL
>V159RF-ABGA01113130.1-trav |(6720, 7010)|2.76714740021|(0.907,0.950,0.918)|-1
MSRGEDVEQTLFLSVQEGDSSVINCTYTDSSSTYLYWYKQEPGAGLQLLTYIFSNMDLKQ
DQRLTVLLNKKDKHLSLRIADTQTGDSAIYFCAEH
>V160RF-ABGA01113133.1-trav |(15271, 15560)|2.50626398197|(0.892,0.764,0.916)|-1
QSVAQPEDEVTVAEGNPLTVKCTYSVSGNPYLFWYIQYPNEGLQFLLKYITGDNLVKGSY
GFEAEFNKSQTSFHLKKPSALVSDSALYFCAVRD
>V161RF-ABGA01132346.1-trgv |(695, 1008)|2.58470018781|(0.961,0.850,0.861)|-1
SQKSSNLEGGTKSVTRPTRSSAEITCDLTVTNALYIHWYLHQEGKAPQRLLYYDVSTARD
VLESGLSPGKYYTHTPRRWSWILRLQNLIENDSGVYYCATWD
>V162RF-ABGA01154384.1-igkv |(10732, 11047)|2.55894751158|(0.884,0.976,0.777)|-1
CNGDIVLTQSPASLAMSPGQRATITCRASESVSVLGMTNLIHWYQQKPGQPPKLLIYRAS
NKDTGVPARFSGSGSGTDFTLTINPVEADDAANYYCMQSKNFP
>V163RF-ABGA01154386.1-igkv |(10957, 11257)|2.63681088489|(0.984,0.967,0.806)|-1
ARCDIQMTQSPSSLSASVGDRVTITCRASQGISSWLAWYQQKPGKAPKPLIYKVSSLESG
IPSRFSGSESGTEFTLTISSLQPEDFATYYCQQYNSVP
>V164RF-ABGA01161530.1-igkv |(226, 526)|2.96461205453|(0.984,0.993,0.988)|-1
IRCDIQMTQSPSSLSASVGDRVTITCRASQGISNYLNWYQQKPGKAPKLLIYRASNLQTG
VPSGFSGSGSGTDFTLTISSLQPEDIATYYCQQYDNLP
>V165RF-ABGA01164369.1-igkv |(1745, 2045)|2.28100642216|(0.922,0.993,0.647)|-1
IRCDIQMTQSPSSLSASVGDRVTITCRASQGISNYLNWYQQKPGKAPKLLIYRASNLQTG
VPPRFSGSRSGTDFTLTISSLQPKDIATYYCQQYDNLP
>V166RF-ABGA01180641.1-igkv |(2646, 2946)|2.89958870068|(0.964,0.956,0.981)|-1
ARCDIQMTQSPSSVSASVGDRVTITCRASQSISSWLAWYQKKPGKAPKLLIYKASSLQSG
VPSRFSGSGSGTEFTLTISSLQPEDFATYYCTQHNSYS
>V167RF-ABGA01180644.1-igkv |(8050, 8350)|2.95695304822|(0.997,0.981,0.981)|-1
ARGDIQMTQSPSSLSASVGDRVTITCRASQSISSYLAWYQQKPGKAPKPLIYAASNLQSG
VPSRFSGSGSGTEFTLTISSLQPEDFATYYCQQYKSDP
>V168RF-ABGA01180644.1-igkv |(24182, 24473)|2.88173242436|(0.960,0.974,0.949)|-1
DIQMTQSPSSVSASVGDRVTISCRASQSISSWLAWYQKKPGKAPKLLIYKASSLQSGVPS
RFSGSGSGTEFTLTISSLQPEDFATYYCTQHNSYP
>V169RF-ABGA01199503.1-igkv |(3988, 4290)|2.53553491703|(0.937,0.829,0.847)|-1
SSGDVVMTQSPLSLPVTLGQPASISCRSSQSLVHSDGNTYLNWFQQRPGQPPRRLIYKVS
NRDSGVPDRFSGSGAGTDFTLKISRVEAEDVGVYYCMQG
>V170RF-ABGA01203420.1-ighv |(3238, 3560)|2.96179201242|(0.988,0.992,0.982)|-1
VQCEVQLVESGGGLVQPGGSLRLSCAASGFTVSSNEMSWIRQAPGKGLEWVSTISRGGST
YYTDSVKGRFTISRDNSKNTLYLQMNSLRVEDTAVYYCARDTVKG
>V171RF-ABGA01203422.1-ighv |(651, 957)|2.20073450253|(0.958,0.995,0.620)|-1
VLSQVQLQESGPGLVKPSETLSLTCAVSGGSISSNYWSWIRQPPGKGLEWIGHIHYGGSN
YLNPSLKSRVTISVDTSKNQFSLKLSSVTAADTAVYYCAR
>V172RF-ABGA01223433.1-trbv |(4452, 4749)|2.70555154488|(0.970,0.899,0.885)|-1
PVNAGVTQTPKFHVLKTGQSMTLQCAQDMNHDYMSWYRQDPGMGLRLIHYSAGAGITDKG
EVPNGYNVSRLNTEDFQLRLESAAPSQTSVYFCASSY
>V173RF-ABGA01225869.1-trbv |(7999, 8296)|2.51607609839|(0.882,0.833,0.824)|-1
PLEAQVTQNPRYLITVTGKKLKVTCSQNMNHEYMSWYRQDPGLGLRQIYYSMNVEVVDKG
DVPEGYNVSRKEKRNFPLILESPSPNQTSLYFCASSL
>V174RF-ABGA01225869.1-trbv |(13353, 13650)|2.32688285033|(0.892,0.829,0.726)|-1
LVDVKVTQSSRYLVKRMGEKVFLECVQDMDHERMFWYRQDPGLGLRLIYFSYDVKMKEQG
DVPEGYSVSREKKGHFSLILESASTNQTSMYLCASSL
>V175RF-ABGA01245923.1-iglv |(7513, 7823)|2.29300259106|(0.868,0.754,0.764)|-1
SLSQPVQTQPSSHSACSGASARLTCTLSSGFSVGDFWISWYQQKPGNPPRYLLYYHSDSD
KGQASGVPSRISGSDDASANAGILHISGLQPEDEADYYCGT
>V176RF-ABGA01252201.1-iglv |(19499, 19791)|1.9041047794|(0.757,0.606,0.663)|-1
CPDSASLSVWISWTVTISCTGTSSDVGSYNVVAWYQQHPGTVLKLMIYRVSYRPSGVPDR
FSGSKSVNMASMTISGLQAEDEADYYCCSYTSSST
>V177RF-ABGA01252206.1-iglv |(13174, 13484)|2.7085913698|(0.904,0.879,0.931)|-1
SWDQSALIQPPSMSGSPGQSVTISCTGTSSDVGGYNYVSWYQQHPGTAPKLMIYAVSNQP
SGVPNRFSGSKSGNTASLTISGLQAEDEADYYCSSYAGSNN
>V178RF-ABGA01252209.1-iglv |(753, 1069)|2.59595373287|(0.899,0.821,0.900)|-1
CVSPFPGSWAQSALIQPPSVSGSPGQSVTISCTGTSSNYVSWYQQHPGKAPKLMIYEVSK
RPSGVPDRFSGSKSGNTASLTISGLQAEDEADYYCSSYASSNN
>V179RF-ABGA01252210.1-iglv |(1732, 2038)|2.56717027154|(0.881,0.836,0.860)|-1
SVASYELTQPLSVSVAPGQTARITCGGNNIGSKAVQWYQQKPGQAPLLVIYSDSNRPSGI
PEQFSGSNLGNTATLTISGAQAGDEADYYCQVRDSSTAHS
>V180RF-ABGA01252215.1-iglv |(9236, 9539)|2.71325628837|(0.927,0.849,0.968)|-1
SEASYELTQPPSVSVSPGQTARITCSGDALPKKYAYWFQQKSGQAPVLVIYKDSKRPSGI
PERFSGSSSGTMATLTISGAQVEDEADYYCYSTDSSGNH
>V181RF-ABGA01252216.1-iglv |(11892, 12202)|2.63821046559|(0.877,0.864,0.900)|-1
SWAQSALTQPRSVSGSPGQSVTISCTGTSSDIGGYNAVSWHQQHPGKAPKLMIYDVSNRP
SGVPNRFSGSKSGNMASLTISGLQAEDEADYYCSSYAGSYT
>V182RF-ABGA01252218.1-iglv |(480, 780)|2.84308808336|(0.971,0.914,0.971)|-1
SVTSYELTQPHSVSVATAQTARITCGGNNIGSKAVHWYQQKPGQAPVLVIYDDSNQPSGI
PERFSGSNSGNTATLTISGAQAGDEADYYCQVWDSSKH
>V183RF-ABGA01252219.1-iglv |(2097, 2400)|2.74978832537|(0.957,0.920,0.894)|-1
SATSYELTQPPSVSVAPRQTARITCGGNNIGSKSVHWYQQKPGQAPVLVIYGDSNRPSGI
SERFSGSNSGNTATLTISRVEAGDEAVYYCQVWDSSSDY
>V184RF-ABGA01252219.1-iglv |(9992, 10295)|2.77912796924|(0.956,0.920,0.915)|-1
SATSYELTQPPSVSVAPRQTARITCGGNNIGSKSVHWYQQKPGQAPVLVIYGDSDRPSGI
SERFSGSNSGNTATLTISRVEAGDEAVYYCQVWDSSSDY
>V185RF-ABGA01252219.1-iglv |(17960, 18263)|2.6542773907|(0.948,0.816,0.958)|-1
SVVSSELTQDPAVSVTLGQTVKITCQGDSLRSYYASWYQQKPGQAPVLVIYGNNNRPSGI
PDRFSGASSGNTASLTITGAQAEDEADYYCNSWDGSGNH
>V186RF-ABGA01252219.1-iglv |(34167, 34477)|2.93706097516|(0.990,0.976,0.973)|-1
SWAQSALTQPPSVSGSPGQSITISCTGTSSDVGGYNYVSWYQQHPGTAPKLMIYDVSKRP
SGVPDRFSGSKSGNTASLTISGLQTEDEADYYCSSYRSGDT
>V187RF-ABGA01252219.1-iglv |(46613, 46923)|2.91816605151|(0.997,0.946,0.986)|-1
SWAQSALTQPASVSGSPGQSITISCTGTSSDVGGYNYVSWYQQHPGKAPKLMIYDVSKRP
SGVPDRFSGSKSGNTASLTISGLQAEDEADYYCSSYRSGST
>V188RF-ABGA01252219.1-iglv |(70767, 71077)|2.81945042313|(0.993,0.938,0.921)|-1
SWAQSALTQPPSVSGSPGQSITISCTGTSSDIGGYNAVSWYQQHPGKAPKLMIYEVSKRP
SGVPDRFSGSKSGNTASLTISGLQAEDEADYYCSSYRSGGT
>V189RF-ABGA01252220.1-iglv |(4657, 4954)|2.38644285263|(0.911,0.754,0.837)|-1
SVDSYELTQPPSVSVSPGQTARITCSGDVLGENYADWYQQKPGQAPVLVIYKDSERPPGI
PERFSGSTSGNTTTLTISSVLTEDKADYYCLSGDEDN
>V190RF-ABGA01252221.1-trav |(31822, 32141)|1.6196691332|(0.520,0.589,0.802)|-1
SVALGQMARITCQGDSIEGSYAHWYQQKPGQAPVLVIYDSSDRPSRIPEQFSGSKSGNTA
TLTITGAQAEDEADYYYQSIDNHATQLTVTQAGGKVRHKPFFCL
>V191RF-ABGA01252221.1-iglv |(70213, 70518)|2.26960626909|(0.945,0.675,0.908)|-1
SEASYELTQPSSVSVSLGQTARITCSGDVLAKKYAQWFQQKPGQAPVLVIYKDSERPSGI
PERFSSSSSGTTVTLTISGAQVEDEADYYCYSGDDNNLTV
>V192RF-ABGA01252221.1-iglv |(89127, 89430)|2.23129594145|(0.974,0.636,0.989)|-1
FEASYELTQPHSVSVSPGQMARITCSGEELPENYAYWYQQKPGQSPVLVIYKDSERPSGI
PERFSGSSSGTTVTLTISGVQAEDEADYYCQSADSSGTY
>V193RF-ABGA01252241.1-iglv |(4150, 4460)|2.46216007741|(0.892,0.763,0.873)|-1
SLSQSMLTQPASLSASPGASASLTCTLRSDINVGTYRIYWYQQKPGSPPRYLLRYKSDSD
KHQGSGVPSRFSGSKDASANAGLLLISGLQSEDEAGYYCMI
>V194RF-ABGA01252241.1-iglv |(8984, 9293)|2.65573742105|(0.944,0.817,0.958)|-1
SWAQSVLTQPPSASGTPGQRVTISCSGSSSNIGSNYVYWYQQFPGMAPKHLIYDNNQQPS
GVPDRFSGSKSGTSASLAISGLRSKDEADYYCAAWDNSLSG
>V195RF-ABGA01252243.1-iglv |(11516, 11822)|2.3731754176|(0.849,0.752,0.814)|-1
SLSQPVLTQSSSASASLGSSVKLTCTLSSGHSSYAIAWHQQQPGKAPRYLMRLEGSGSYN
KGSGIPDRFSGSSSGADRYLTISNLQSEDEADYYCQTWDS
>V196RF-ABGA01252243.1-iglv |(44201, 44510)|2.6405430066|(0.845,0.898,0.962)|-1
SWAQSVLTRPPSVSAAPGQKVTISCSGSSSNIGNYAVSWYQQLPGTAPKLLIYENNKRPS
GISDRFSGSKSGTSATLGITGLQTGDEADYYCSAWDSSLSA
>V197RF-ABGA01252243.1-iglv |(49802, 50111)|2.65070124383|(0.974,0.830,0.933)|-1
SWAQSVLTQPPSASGTPGQRVTISCSGSSSNIGSNYVYWYQQFPGMAPKLLIYDNNQRPS
GVPDRFSGSKSGTSASLAISGLRSEDEADYYCAALDNSLSG
>V198RF-ABGA01252243.1-iglv |(59510, 59817)|1.89525983554|(0.758,0.922,0.520)|-1
SSSQAVVTQEPSLTVSPGGTVTFTCGSSTGAVTSDHYPYWLQQKPGQAPRTLIYDTSKKH
PWTPDWFSGSLLGDKAALTLSGAQPEDEAEYYCLLHYSGA
>V199RF-ABGA01252248.1-iglv |(2689, 2998)|2.46943668383|(0.857,0.763,0.888)|-1
SVVQAGLTQPPSVSKGLRQTATLTCTGNSNNVGNQGAAWLQQHQGHPPKLLSYRNNNRPS
GISERFSASRSGNTASLTITGLQPEDEADYYCSAWDSSLSA
>V200RF-ABGA01252248.1-iglv |(12457, 12769)|2.64627887443|(0.940,0.825,0.933)|-1
SWAEVVFTQPHSVSGSPGQTVTISCTRSSGSIDNRYVYWYQQRPGSAPTTVIYDDNQRPS
GVPDRFSGSIDSSSNSASLTISGLKSEDEADYYCQSANDSHN
>V201RF-ABGA01252248.1-iglv |(17958, 18262)|1.85561957445|(0.896,0.723,0.617)|-1
SWAQSALTQEASVSGTVGQKVTLSCTGNSNNVGSYAVGWYQQISHCAPKTVMLGNSRPSG
IPDRFSGSKSGTTASLTISGLQPEDEANYYCSIWDYSLS
>V202RF-ABGA01252249.1-iglv |(2028, 2335)|2.53695709034|(0.883,0.779,0.924)|-1
SWANFMLTQPHSVSGSVGQKVIISCTRSSGSIGSYYVQWYQQHSGSAPTTVINKDNQRPS
GVPDRFSGSIDSSSNSASLTISGLKTEDEADYYCQSYDSS
>V203RF-ABGA01257764.1-igkv |(287, 587)|2.57994535601|(0.977,0.772,0.986)|-1
ATCDIQMTQSPFSLSASVGDRVTITSRASQGITNELAWYQQKPGKAPKFLIYSASSLQTG
VTSRFSGSGSGTDYTLTISSLQPEDVATYYCQRDYNTP
>V204RF-ABGA01257764.1-igkv |(8367, 8682)|2.32238544524|(0.983,0.810,0.786)|-1
SSGDVVMTQTPLSLPVTPGEPASISCRSSQSLLHSDGNTYLDWYLQKPGQSPQLLIYRVS
NRASGVPDRFSGSGSGTDFTLKISRVEAEDVGVYYCMQATKTP
>V205RF-ABGA01257764.1-igkv |(15129, 15444)|2.15055741524|(0.927,0.607,0.956)|-1
TSGDIAMTQTPLSLPVTPGEPASVSCRSSQSLLHSDGNTYLDWYLQKPGQPPQLLIYMLS
YRASGVSDRFSGSGSGTDFTLKISRVEAEDVGVYYCMQALQAP
>V206RF-ABGA01257772.1-igkv |(3885, 4185)|2.97832013632|(0.987,0.994,0.998)|-1
ARCAIQMTQSPSSLSASVGDRVTITCRASQGISNELSWYQQKPGQAPTLLIYAASSLQSG
VPSRFSGSGSGTDFTLTISSLQPEDVATYYCLQDYTTP
>V207RF-ABGA01257777.1-igkv |(9241, 9556)|2.33704157495|(0.975,0.702,0.927)|-1
SSGDIVMTQTPLSLPVTLGQPASMSCRSSQSLLDSDGYTYLDWYLQKPGQSPQLLIYEVS
NRASGVPDRFSGSGSGTDFTLKISRVEAEDVGVYYCMQALQVP
>V208RF-ABGA01259417.1-trbv |(2271, 2571)|2.70796782636|(0.913,0.974,0.851)|-1
HADTGVSQDPRHKITKRGQNVTFRCDPISEHNRLYWYRQTLGQGPEFLTYFQNEAQQEKS
GLFSDQFSAERPKGSFSTLKIQRTEQGDSAMYLCASSL
>V209RF-ABGA01276916.1-igkv |(1327, 1627)|2.91377652089|(0.993,0.956,0.972)|-1
ARCDIQMTQSPSSVSASVGDRVTITCRASQSISSWLAWYQQKPGKAPKLLIYKASNLQSG
VPSRFSGSGSGTDFTLTISSLQPEDFATYYCIQHSSTP
>V210RF-ABGA01277799.1-trbv |(1145, 1442)|2.35960786889|(0.877,0.699,0.906)|-1
HRDAGITQSPRYKVTETGRQVTLTCHQTWSHSYMFWYRQDLGHGLRLIYYSTATGITDKG
EVPDGYIVSRSKTENFLLTLESATRSQTSVYFCASSE
>V211RF-ABGA01277800.1-trbv |(311, 608)|2.31688981302|(0.870,0.676,0.921)|-1
HRDAGITQSPRHKITETGRQVTLTCHQTWSHSYMFWYRQDLGHGLRLIHYSLGVPDTNKG
EVSDGYTVSRSKTEDFPLTLESAASSQTSVYFCASSE
>V212RF-ABGA01277802.1-trbv |(3406, 3702)|2.12634214063|(0.814,0.691,0.717)|-1
PVQAGVTQSPTHLIKMRGQQVTLRCSPFSGHTSVSWYQQSLGQGPQFIFEYANELRRSKG
NFPDRFSGRQFRDYHSEMNVSALELGDSALYLCASRL
>V213RF-ABGA01277802.1-trbv |(6147, 6443)|2.71962645851|(0.922,0.871,0.938)|-1
PVDSGVTQTPKHLITATGQRVTLRCSPRSGDLSVYWYQQSLDQGLQFLIQYYNGEEREKG
NILERFSAQQFPDLHSELNLSSLELGDSALYFCASSV
>V214RF-ABGA01277803.1-trbv |(1353, 1650)|2.18759378827|(0.832,0.691,0.761)|-1
PVQAGVTQSPTHLIKMRGQQVTLRCSPFSGHTSVSWYQQSLGQGPQFIFEYANELRRSKG
NFPDRFSGRQFRDYHSEMNVSALELGDSALYLCASKV
>V215RF-ABGA01277806.1-trbv |(4577, 4874)|2.1456943343|(0.891,0.684,0.778)|-1
PVIAGITQAPRSQILAAGRSVTLRCTQDMRHNAMYWYRQDLGLGLRLIHYSNTAGTIGKG
EVPDGYSVSRANTDDFPLTLVSAIPSQTSVYFCASSD
>V216RF-ABGA01277808.1-trbv |(1866, 2166)|2.56495295177|(0.915,0.964,0.773)|-1
HTGAGVSQSPSNKVTEKGKDVELRCDPISGHTALYWYRQSLGQGLEFLIYFQGNSAPDES
GLPSDRFYAERSGGSISTLKIQHTQQEDSAMYLCASSL
>V217RF-ABGA01277809.1-trbv |(3151, 3448)|2.54196334765|(0.921,0.942,0.769)|-1
PLDTAVSQTPKYLVTQMGKKESLKCEQNLGHDAMYWYKQDSKKFLKIMFIYNNKEPILNE
TVPNRFSPNSPDKAHLQLHISSLELGDSAVYFCASSQ
>V218RF-ABGA01277809.1-trbv |(14738, 15029)|2.68402955788|(0.966,0.917,0.857)|-1
NAGVTQIPKFRVLKTGQSMTLQCAQDMNHDYMYWYRQDPGMGLRLIHYSAGEGTTTKGEV
PDGYNVSRLKKQNFLLGLESAAPSQTSVYFCASSY
>V219RF-ABGA01277810.1-trbv |(2890, 3197)|2.77725275647|(0.931,0.981,0.884)|-1
PVNAGVTQTPKFQVLKTGQSMILQCAQDMNHDYMYWYRQDPGMGLRLIHYSLDVGTTDKG
EVPDGYNVSRLNIQNFLLRLESAAPSQTSVYFCASSEATV
>V220RF-ABGA01277810.1-trbv |(5526, 5817)|2.67046330217|(0.951,0.931,0.839)|-1
NAGVTQTPKFRVLKTGQSITLQCAQDMNHNSMYWYRQDPGMGLRLIHYSVGAHSTEKGEV
PDGYNVSRLNTQNFLLRLKSAAPSQTSVYFCASSE
>V221RF-ABGA01277811.1-trbv |(730, 1043)|2.15722785475|(0.874,0.832,0.646)|-1
PMETGVTQTPRHLVMGMTNKKSLKCEQDLGHNAMYWYKQSAEKPPELMFVYNLKEPTENN
SVPSRFSPECPNSSHLFLHLHALQPEDSALYLCASSQDTALQ
>V222RF-ABGA01277815.1-trbv |(5061, 5368)|2.69833138847|(0.946,0.864,0.918)|-1
PVNAGVTQTPKFQVLKTGQSMTLQCAQDMNYDNMYWYRQDPGMGLKLIHYSVGEGTTDKG
EVPDGYNVSRLNRQNFLLRLESAAPSQTSVYFCASGYSTA
>V223RF-ABGA01277825.1-trbv |(768, 1064)|2.3394018452|(0.857,0.705,0.866)|-1
PVEAGVTQTPRCLIKTRGRQVTLSCSPISGHRSVSWYQQTPGQGLQFLFEYFSGTQREKG
NFPDRFSGHQFSNSRSEMNVSALELGDSALYLCASSL
>V224RF-ABGA01277826.1-trbv |(1650, 1946)|2.3028436326|(0.856,0.688,0.866)|-1
PVEAGVTQTPRCLIKTRGRQVTLSCSPISGHRSVSWYQQTPGQGPQFLFEYFSGTQREKG
NFPDRFSGHQFSNSRSEMNVSALELGDSALYLCASSL
>V225RF-ABGA01277827.1-trbv |(7144, 7457)|2.35415482322|(0.834,0.906,0.702)|-1
PIDTEVTQTPKHLVMGMTNKKSLKCEQHMGHRTMYWYKQKAKKPPELMFAYSYEKLSINE
SVPSRFSPECPKSSLLNLHLHALQPEDSALYLCASSQDTALQ
>V226RF-ABGA01277830.1-trbv |(3068, 3365)|1.82392069206|(0.591,0.831,0.609)|-1
STDTGITQTPKYLITAMGSKRTLKCEQHLGHDSMYWYTQKAKKSLEFMFYYNYKELIENE
TVPSHFTPECPDSSCLHLHVVALQPENSALYLYTSSQ
>V227RF-ABGA01277830.1-trbv |(4944, 5235)|2.57123009791|(0.898,0.850,0.844)|-1
PEVTQTPSHQVTQMGQEVILQCVPISNHLYFYWYRQILGQKIEFLVYFFNDKISEKSEIF
DDRFSAERPDGSNFTLKIQSTKLEDSAMYFCASSE
>V228RF-ABGA01277830.1-trbv |(8902, 9215)|2.10031904126|(0.665,0.827,0.720)|-1
PMDTRITQTPKHMVTAMGSKRMLKCEQHLGRDSMYWYRQKAKKSLEFMFYHSFKELIENE
TVPNHCTPECPDSSRLYLHVVALQPEIQLCIFCTSSQDTALQ
>V229RF-ABGA01277830.1-trbv |(10763, 11061)|2.32897352832|(0.888,0.745,0.803)|-1
TQTPSHQVTQMGQEVILQCVPIPNHLRFYWYRQILGQKVEFLVSFYSDKISEKSEIFDDR
FSVRRPDGSHFTLKIQSTKLEDSAMYFCASSEGTALQ
>V230RF-ABGA01277831.1-trbv |(7025, 7319)|1.73423524537|(0.693,0.639,0.523)|-1
SMDTGITQTPKYLVTAMGSKRTMKREHLGHDSMYWYRQKAKKSLVFMFYPNCKEFIENKT
VPNHFTPECPDSSRSYLHVVALQQEDSALYLGTSSQ
>V231RF-ABGA01277831.1-trbv |(8933, 9224)|2.21392287504|(0.897,0.857,0.663)|-1
PEVTQTPSHQVTQMGQEVILQCVPISNHLYFYWYRQILGQKVEFLVSFYSDKISEKSEIF
DDRFSVRRPDRSHFTLKIQSTKLEDSAMYFCASSE
>V232RF-ABGA01277831.1-trbv |(20035, 20348)|2.39317808679|(0.843,0.938,0.713)|-1
PIDTGITQTPKHLVMGMANKKSLKCEQHMGHKAMYWYKQKVKKPPELMFVYNYEELSINE
SVPSRFSPECPKSSLLNLHLHALQPEDSALYLCASSQDTALQ
>V233RF-ABGA01277831.1-trbv |(28345, 28641)|2.42285464852|(0.909,0.833,0.774)|-1
TQTPSHQVTQMGQEVVLQCVPIPNHLNFYWYRQILGQKVEFLVYFYNDNISEKSEIFDDR
FSVERPNGSHFTLKIQSTKLEDSAMYFCASSEATALQ
>V234RF-ABGA01315458.1-igkv |(1340, 1640)|2.16047876557|(0.994,0.917,0.650)|-1
TTGEIVMTQSPATLSLSPGERATLSCRASQSVSNYLAWYQQKPGQAPRLLIYGASNRATG
IPARFSGSGSGTDFTLTISSLEPEDFAVYYCQQGNNLP
>V235RF-ABGA01321066.1-trav |(553, 839)|2.12363221539|(0.672,0.773,0.886)|-1
VSAAKNEVEQSPQDLTAQEGELITINCSYSVGTNALHWLQQHPGGGIVSLFMLSSGKKKN
GRLIATINIQEKHSSLHITASQPRDSAIYICAV
>V236RF-ABGA01321067.1-trav |(4468, 4758)|2.10572179556|(0.841,0.798,0.633)|-1
GTSSNSVKQTGQITVSEGASVTMNCTYTSAGYPTLFWYVQYPSKPLQLLQRETMENSKNF
GGRNIKDKNSPIVKYSVQVSDSAVYYCLLGDTVLK
>V237RF-ABGA01321068.1-trav |(6457, 6745)|2.42721611554|(0.821,0.744,0.959)|-1
LSGELKVGQNPLFLSTQEGKNYTIYCNYSTTSDRLYWYRQDPGKSLESLFVLLSNGAVKQ
EGRLMASLDTKARLSTLHITAAVHDLSATYFCAV
>V238RF-ABGA01321070.1-trav |(796, 1096)|2.7190132749|(0.953,0.954,0.852)|-1
FSMAQTVTQSQPEMSVQEAETVTLSCTYDTSESDYYLFWYKQPPSRQMILVIRQEAYKQQ
NATENRFSVNFQKAAKSFSLKISDSQLGDAAMYFCAYR
>V239RF-ABGA01321072.1-trdv |(3234, 3535)|2.12625740098|(0.734,0.766,0.655)|-1
SSMAQTVTQSQPEMSVQEAETVTLSCTYDTSESNYYLFWYKQPPSRQMILVIRQEAYKQQ
NATENRFSVNFQKAVKSFSLKISDSQLGDTAMYFCAFM
>V240RF-ABGA01321081.1-trbv |(2269, 2555)|1.50009507238|(0.590,0.541,0.452)|-1
VSGQQLNQSPQSMSIQEGEDVSMNCTSSSLFNTLLWYKQDPGEGPVLLIALYKAGELTPN
GRLTAQFGITRKDSFLNISASIPSDVGTYFCAG
>V241RF-ABGA01321081.1-trav |(7033, 7323)|2.15998276351|(0.681,0.871,0.848)|-1
VSSEDKVVQSPLSLVVHEGDTVTLSCNYEVANFRSLLWYKQEKKAPTFLFMLTSSGIEKK
SGKLSSILDKKELFSILNITATQTRDSAIYLCAVE
>V242RF-ABGA01321090.1-trav |(1808, 2098)|1.89870125036|(0.611,0.748,0.906)|-1
TIIDAKTTQPTSMDCAEGRAANLPCNHSTISGNEYVYWFRQIHSQGPQYIIHGLKNNETN
EMASLIITEDRKSSTLILPHATLRDTAVYYCIVRV
>V243RF-ABGA01322683.1-igkv |(9303, 9618)|2.30623139144|(0.981,0.684,0.944)|-1
SSGDIVMTQTPLSLPVTLGQPASMSCRSSQSLLDSYGNTYLDWYLQKPGQSPQLLIYEVS
NRASGVPDRFSGSGSGTDFTLKISRVEAEDVGVYYCMQATQTP
>V244RF-ABGA01349559.1-trbv |(456, 747)|2.25219665617|(0.821,0.710,0.777)|-1
LMEADIYQTPRHCVIRTGKKITLECSQTMGHDKMYWSRSRNGITPHPLFLWVNSTEKGDL
SFESTVSRIRIERFPLTLESASPSHTSQYLCASSE
>V245RF-ABGA01354649.1-ighv |(173, 497)|2.23540849124|(0.795,0.859,0.664)|-1
AHSQVQLVQSEPEMKQPGASVKFSCKATGYTFTSYVMNWVRQAPGQGLEWVGWINTNTGN
PMYAQGFTGQFVFSMDTSVSTVYLQISSLKAEDMAVYYCLRDTVWK
>V246RF-ABGA01358461.1-trav |(1239, 1538)|2.15023844071|(0.703,0.707,0.937)|-1
VSSKQEVTQIPGALSVPEGENLVLNCSFTDRAIYNLQWFRQDPGKGLTSLLFIQSSQREQ
TSGRLNASLDKSSGRSTLSIAASQPGDSATYLCAVRHS
>V247RF-ABGA01360476.1-ighv |(4349, 4657)|2.81583447505|(0.952,0.957,0.913)|-1
AHSQVQLVQSGAEVKKPGTSVKISCKASGYTFTSYYMHWVRQAPGQGLEWIGRINPNSGN
TNYAQKFQGRVAMTRDTSISTAYMELRSLRSEDTATYYCGE
>V248RF-ABGA01360478.1-ighv |(1164, 1473)|2.8142673543|(0.917,0.928,0.992)|-1
AHSQVQLVQSGAEVKKPGASVKFSCKASGYTFTDYFMHWMLQAPGQRLEWMGWISAGNGN
TKYSQKFQGRVTITRDTSASTAYMELSSLRSEDTAVYYCVR
>V249RF-ABGA01360480.1-ighv |(4035, 4344)|2.62019108561|(0.946,0.914,0.823)|-1
VLSQVQLQESGPGLVKPLETLSLTCAVSGGSISSSNWWSWVRQPPGKGLEWIGEIYQSGS
TNYNPSLKSRVTISVDKSKNQFSLKLSSVTAADTAVYYCAR
>V0RF-ABDC01047890.1-ighv |(234, 540)|2.66551395414|(0.858,0.896,0.952)|1
VQCNVQLVESGGGLVQPGGSLTLSCAASRFTFSSYAMSWFRQAPGKGMEWVALIRNDGST
YYADAVKSEFTISRDNAKNKLYLQMNSLRAEDTALYYCAR
>V1RF-ABDC01116809.1-trbv |(1516, 1820)|1.95770592112|(0.745,0.932,0.551)|1
PLEAQVTQIPRYLITETGKKVTVTCSQNMNHEYMFWYRQDPGQGLKLVYYSVNVGFVTEG
DVSEGYTASRTERPSFPLNVESARASQTALHLCASSLYS
>V2RF-ABDC01116809.1-trbv |(7343, 7638)|2.35270803341|(0.786,0.789,0.778)|1
LVDAEVTQTPGHLIKRTGEKVLLECSQDMDHERMFWYRQDPGLGLRLIYFSFDVGSEEKG
DVWEAYSASRKQKDRFPLVLESAGTNQTSVYLCASR
>V3RF-ABDC01165520.1-igkv |(7469, 7769)|2.78329117012|(0.907,0.954,0.934)|1
ARCDIQMTQSPSSLAASVGDTVTISCRASQGISSWLSWHQQKPGKPPKTLINKASNLESG
VPSRFSGSGSGTDFTLTIKGLQPEDFATYYCQQYDSSP
>V4RF-ABDC01231268.1-ighv |(5361, 5667)|2.9509635143|(0.969,0.988,0.999)|1
VQCDVQLLESGGGLVQPGGSLRLSCAASGFTFSSYYMHWVRQAPGKGLEWVSTISSGGST
YYADAVKGRFTISRDNGKSSLYLQMNSLKAEDTAVYYCAR
>V5RF-ABDC01231269.1-ighv |(3071, 3380)|2.15619605567|(0.966,0.954,0.619)|1
AHSEVQLVQSGAEVKPPGASVKVSCKASGYTFTSYYMHWVRQAPGQGLEWEGRINPSSGE
TNYAQKFQGRVTMTRDTSTSTAYMELSSLRPEDTAVYYCAR
>V6RF-ABDC01231272.1-ighv |(378, 697)|2.91994052476|(0.980,0.977,0.964)|1
VQCEVQLVESGGGLVQPGGSLRLSCVASGFTLTSYGMNWVRQAPGKGLEWISYIYSSSTS
YADSVKGRFTISTDNGKNSLYLQMNSLRAEDTAMYYCARHTVRG
>V7RF-ABDC01231274.1-ighv |(17, 332)|2.9136312831|(0.988,0.988,0.945)|1
VQCEVQLVESGGGLAQPGGSLRLSCAASGFTFSSYYMYWVRQAPGKGLEWVGFVRNKANG
GTAEYAASVKGRFTISRDDSKSTAYLQMNSLRAEDTALYYCAR
>V8RF-ABDC01231277.1-ighv |(694, 1003)|2.95920030738|(0.992,0.978,0.990)|1
VQCEVQLAESGGGLVQPGGSLRLSCAASGFTFSNYYMYWVRQAPGKGLEWISTISNSGSS
TGYADSVKGRFTTSRDNSKNMLYLQMNSLKAEDTALYYCAR
>V9RF-ABDC01282056.1-ighv |(476, 782)|2.87393377978|(0.974,1.000,0.916)|1
VQCEVQLVESGGGLVQPGGSLKLSCAASGFTFSSYDMHWVRQAPGKGLEWVSVIGIGGST
YYADAMKGRFTISRDNGKNMLYLQMSSVQAEDTAVYYCTR
>V10RF-ABDC01282057.1-ighv |(6536, 6858)|2.97186400565|(0.990,0.995,0.987)|1
VQCEVQLVESGGGLVQPGGSLRLSCAASGFTFSSYWMYWVRQAPGKGLEWVSRINPDGGS
TNYADAVKGRFTISRDNGKNTLYLQMNSLKAEDTAVYYCARDTVT
>V11RF-ABDC01282063.1-ighv |(1659, 1962)|2.5141490894|(0.953,0.756,0.949)|1
VQCEEQLVESGGGLVQPGGSLRLSCAASGFSFDDYVMHWIRQAPGKGLEWISYIYSSSTS
YADSVKGRFTISSDNGKNMLYLQMNSLRAEDTAMYYCAR
>V12RF-ABDC01282065.1-ighv |(718, 1027)|2.81847022872|(0.913,0.997,0.939)|1
VQCEVQLVESGGGLVPPGGSLRLSCAASGFTFSDYWMSWIRQAPGKGLEWVGEINGDGGN
TNYADAMKGRFTISRDNSKNTLYLQMNSLRAKDTAVYYCGR
>V13RF-ABDC01296165.1-iglv |(3112, 3422)|2.27288010117|(0.854,0.822,0.696)|1
SLSQPVVTQPPSLSASPGASARLTCTLSSGFSVGSYAISWHQQKPGSPPRYLLYYHTDSN
KHQGSGVPSRFSGSKDASANAGILHVSGLQPEDEADYYCAV
>V14RF-ABDC01296165.1-iglv |(8050, 8360)|2.75377635195|(0.968,0.903,0.912)|1
SLANFVLTQPSSVSGSPGQKVTISCTRSSGNIGSNYVHWYQQRPGSAPTTVIYRDDKRPS
GVPDRFSGSSDSSSNSASLTISGLQSEDEADYYCQSYDASA
>V15RF-ABDC01296166.1-iglv |(4596, 4906)|2.24102369104|(0.852,0.822,0.681)|1
SLSQPVVTQPPSLSASPGASARLTCTLSSGFSVGSYAISWHQQKPGSPPRYLLYYHTDSD
KHQGSGVPSRFSGSKDASANAGILHVSGLQPEDEADYYCAV
>V16RF-ABDC01296168.1-iglv |(909, 1230)|2.58836972059|(0.897,0.808,0.916)|1
SLSQPVLTQPPSASASPGASAKLTCTLSSGYSNYGIAWHQQHPEKSPRYLMYVYSDGSQS
KGDGIPDRFSGSSSGADRYLTISNVQPEDEADYYCQTWDGGVNHS
>V17RF-ABDC01314385.1-ighv |(9449, 9758)|2.22894064702|(0.930,0.962,0.635)|1
AHSQVQLVQSGAEVRPPGASVKVSCRASGYTFTSYYIEWVKQAPGQGLEWMGGVDPEDGS
TSYAQKFQGRVTMTATTSTNTAFMELSNLRPEDTAVYYCAR
>V18RF-ABDC01314388.1-ighv |(6282, 6597)|2.87845228213|(0.931,0.994,0.978)|1
VQCEVQLVESGGGLVQPGGSLKLSCAASGLTFSDYWMSWIRQAPGKGLEWAGLNRSKAYG
GIAEYAASVKDRFTISRDDSKSTAYLQMNSLKAKDTALYYCVR
>V19RF-ABDC01318810.1-iglv |(8940, 9256)|1.96219858316|(0.756,0.549,0.848)|1
SLSQPVLTQPPSASASPGASAKLTCTLSSGYSNYGIAWLQQQPGKAPRYLMGLSSDGSHS
KGDGIPDRFSGSSSGADRYLTISNVQPEDEADYHCQTGDSSGV
>V20RF-ABDC01318810.1-iglv |(15156, 15463)|2.74432013632|(0.909,0.920,0.916)|1
SWAQSALTQPPSVSGAPGETVTISCSGSSSNIGGYDANWYQQLPGTAPKLLIYGNSNRPS
GVPARFSGSKSGSSASLTIAGLQAEDEGDYYCSSWDSSLS
>V21RF-ABDC01318812.1-iglv |(1658, 1965)|2.38887925697|(0.984,0.763,0.870)|1
SWAQSALTQPPSVSGAPGQSVTISCLGSNSNIGGNYANWYQQLPGTAPKTLIYANSNRPS
GVPARFSGSKSGSSASLTITELQAEDEADYYCSAWDDSLS
>V22RF-ABDC01339850.1-iglv |(5825, 6125)|2.00730875209|(0.640,0.887,0.726)|1
SVASQLTQVPAVSVALGQTASITCQGDGIRSYYANWYQQKPGQAPVLLIYSDNNRPSGIP
ERSSGSNSGNMATLTMNRAQADDEGDYHCQSFDSRGTL
>V23RF-ABDC01342328.1-iglv |(7715, 8025)|1.88536808653|(0.845,0.562,0.773)|1
SLSQPAVTQLPSLSASPGASARLTCTLRSDISVGGKYVYWHQQKPGSPPRYLLYYYSDSN
KHQGSGVPSRFSGSKDTSANAGILHVSGLQPEDEADYYCAM
>V24RF-ABDC01342328.1-iglv |(12642, 12952)|2.72919069344|(0.925,0.918,0.891)|1
SLANFFLTQPSSVSGSPGQKVTISCTRSSGNIGSNYVHWYQQRPGSAPSTVIYEYNKRPS
GVPDRFSGSMDSSSNSASLTISGLQSEDEADYYCQSYDGSY
>V25RF-ABDC01347843.1-iglv |(8431, 8731)|2.45377464153|(0.824,0.777,0.870)|1
SVASQPNQVPAVSVALGQTASITCQGDGLRSYYPGWYQQKPGQAPVLVFYGNNKRPSGIP
ERFSGSKSGNTAMLTISGAQADDEADYYCQTWDSTGTH
>V26RF-ABDC01347844.1-iglv |(5493, 5791)|2.27418623558|(0.928,0.679,0.892)|1
SVASQLTQVPAVSVALGQTARITCQGDSLRSYYANWYQQKPGQAPVLLIYGDNQRPSGIP
ERFSGSKSGNTATLTVSGAQVEDEADYYCGSYAGSGT
>V27RF-ABDC01349227.1-iglv |(6289, 6587)|2.67563765192|(0.903,0.902,0.874)|1
SVASQVTQVPAVSVALGQTARITCQGDSLSSYYPGWYQQKPSQAPVLVVYGNNERPSGIP
ERFSGSKSGNTATLTISGAQVEDEADYYCGSYAGSGT
>V28RF-ABDC01349228.1-iglv |(9399, 9710)|1.83970027386|(0.938,0.513,0.907)|1
AVSPYELTQPPSVSVTPGQTARIPCSGDKLGERYVHWYQQKPGQAPVLVIYGDSNRPSGI
PERFSGSSSGNTAALTISGAQAGDEADYYCQVWDSSSDHLTA
>V29RF-ABDC01349230.1-iglv |(865, 1165)|2.65380255864|(0.899,0.879,0.879)|1
SVASQLTQVPAVSVALGQTASITCQGDGLSSDYANWYQQKPGQAPVLLIYGENQRPSGIP
ERFSSSDSGDTATLTISGAQAGDEADYYCQVWDSENNK
>V30RF-ABDC01351831.1-igkv |(554, 852)|2.43003581605|(0.768,0.908,0.935)|1
TRCDIQVTQSPSSVSASPGDTVTISCRASQDISNRLSWYQQKPGKPPKALIYVASNLHSG
VSSRFSGSGSGTDYSLTIRGLETDDAATYFCRQYKIN
>V31RF-ABDC01351832.1-igkv |(2497, 2812)|2.43260794104|(0.969,0.730,0.941)|1
SSGDVVMTQTPVSLPVTPGEPASISCRSSQSLLHSDGKTYLYWYLQKPGQSPQLLIYLGF
TRASGVPDRFSGSGSGTDFTLKISKVEAEDVGVYYCMQAIQPP
>V32RF-ABDC01351835.1-igkv |(461, 776)|2.32613387471|(0.987,0.676,0.984)|1
SNGEIVMTQTPLSLPVTPGEPASISCRSSQSLLHSDGNTYLHWYLQKPGQSPQLLIYRVS
NRFSGVPDRFSGSGSGTDFTLKISRVEAEDVGVYYCMQGTQTP
>V33RF-ABDC01351837.1-igkv |(5117, 5415)|2.43937199438|(0.770,0.902,0.904)|1
TRCDIQVTQSPSSMSVSPGDTVTISCRASQDISNRLSWYQQKPGKPPKPLIYVASNLHSG
VSSRFSGSGSGTDYSLTIRSLETDDAATYFCRQYKNN
>V34RF-ABDC01351837.1-igkv |(9264, 9579)|2.68572510959|(0.855,0.958,0.949)|1
SSGDVVMTQTPLSLSVTPGESASISCRASQSIQDSDGNTYLNWFLQKPGQPPRRLIHKVS
NRDSGVSDGFSGSGSGTDFTLKISRVEAEDVGVYYCMQASYFP
>V35RF-ABDC01352111.1-iglv |(14382, 14693)|2.31250810775|(0.944,0.706,0.881)|1
SWAQSALTQPPSVSGAPGQSVTISCLGSSSNIGGGYVVHWYQQLPGTAPKLLIYGGSGRP
SGVPARFSGSKSGSSASLTIAGLQAKDEADYYCQSYDSSLDA
>V36RF-ABDC01352115.1-iglv |(760, 1084)|2.57014391427|(0.897,0.802,0.907)|1
SLSQPVLTQPPSASASPGASAKLTCTLSSGHSNYGITWHQQQPGKAPRYLMYVYSDGSQS
KGDGVPDRFSGSSSGADRYLTISNVQPEDEADYYCQTADSSGVNHS
>V37RF-ABDC01359388.1-iglv |(1496, 1806)|2.85822051637|(0.965,0.925,0.975)|1
SLANFVLTQPSSVSGSPGQKVTVSCTRSSGNIGSNYVYWYQQRPGSAPTTVIYRDDQRPS
GVPDRFSGSIDSSSNSASLTISGLQSEDEADYYCQSYDGSA
>V38RF-ABDC01360510.1-igkv |(1890, 2205)|2.30822903169|(0.860,0.804,0.726)|1
SSGDIVMTQTPLSLPVTPGEPASISCRSSQSLLHSNGNTYLQWYLQKPGQSPQPLIYRVS
NRFSGVPDRFSGSGAGTDFTLKISRVEAADVGVYYCMQGIQFP
>V39RF-ABDC01360510.1-igkv |(9535, 9833)|2.2662832157|(0.727,0.896,0.985)|1
IRCDIQMTQSPSSLAASPGETVTISCRASQGINRNLAWYQHKPGNAPKRLIYGASNLQSG
VSSRFSGSGSGTDYSLTIRGLETDDVATYFCHQYNSN
>V40RF-ABDC01360510.1-igkv |(13925, 14240)|2.25797597859|(0.963,0.663,0.937)|1
SRGDIVMTQTPVSLPVTPGEPASISCRSSQSLLHSNGKTYLQWFLQKPGQSPQLLIYLGF
TRASGVPDRFSGSGSGTDFTLKISKVEAEDVGVYYCMQTIQLP
>V41RF-ABDC01360666.1-igkv |(4785, 5100)|2.69285230673|(0.968,0.844,0.943)|1
SSGDIVMTQTPLSLPVTPGESASISCRSSQSLLHSDGKTYLQWFLQKPGQSPQLLIYLGF
TRASGVPDRFSGSGSGTDFTLKISKVEAEDVGVYYCMQTIQFP
>V42RF-ABDC01360670.1-igkv |(1063, 1378)|2.01137315619|(0.842,0.603,0.784)|1
SSGDIVMTQTPLSLPVTPGEPASISCRASESLLDSDGKTYLYWFLQKPGQPPRRLIYQVS
NRDSGVSDRFSGSGSGTDFTLKISRVEAEDVGVYYCAQATKLP
>V43RF-ABDC01363519.1-trav |(2177, 2465)|2.08653920452|(0.726,0.688,0.685)|1
SLSLAKTTQPIAMESYEGQEVNIPCSHTDIATSETIFWYQQFPNQGPRFIIQGYKTNVTN
EVASLFIPADRKSSTLSLSRAALSDSAVYYCILD
>V44RF-ABDC01369756.1-iglv |(799, 1120)|2.00710936045|(0.637,0.819,0.684)|1
ATSQEVVTQETSLLTTPGGTVTLTCGSSTGAVTTSNYASWVQQKSNEVPRGLIGGTSNRY
PGVPARFSGSLLGDKAALTITGAQAEDEAKYYCALWFSNHFHSDR
>V45RF-ABDC01369760.1-iglv |(2306, 2610)|2.15435024577|(0.682,0.799,0.740)|1
TSQEVVTQETSLLTTPGGTVTLTCGSSTGAVTTSNYANWVQQGSNEVPRGLIYGTSNRYP
GVPARFSGSLLGDKAALTITGAQAEDEAEYYCALWFSNH
>V46RF-ABDC01373300.1-ighv |(1180, 1499)|2.92151211712|(0.978,0.977,0.967)|1
VQCEVQLVESGGGLVQPGGSLRLSCVASGFTLTSYGMNWVRQAPGKGLEWISYIYSSSTS
YADSVKGRFTISTDNGKNTLYLQMNSLRAEDTAMYYCARHTVRG
>V47RF-ABDC01373301.1-ighv |(8478, 8785)|2.97985201038|(0.991,0.997,0.992)|1
VQCEVQLVESGGGLVQPGGSLRLSCAASGFTFSSYYMHWVRQAPGKGLEWVSRINPDGGS
TIYADAVKGRFTISRDNSKNSLYLQMNSLKAEDTAVYYCA
>V48RF-ABDC01375549.1-ighv |(174, 483)|2.95964845687|(0.987,1.000,0.974)|1
VQCEVQLVESGGGLVQPGGSLRLSCAASGFTFSSYWMNWVRQAPGKGLEWVADINGDGGS
TNYADAVKGRFTISRDNAKNSLYLQMNSLRAEDTALYYCAT
>V49RF-ABDC01375549.1-ighv |(8525, 8840)|2.85231565319|(0.971,1.000,0.903)|1
VQCEVQLVESGGGLVQPGGSLKLSCVASGFTFSDYYMHWVRQAPGKGLEWVAFIRNKANG
GTAEYAASVKGRFTISRDDSKSTAYLQMNSLRTEDTAVYYCER
>V50RF-ABDC01377237.1-ighv |(8637, 8946)|2.9798400105|(0.996,0.990,0.994)|1
VQCDVQLVESGGGLVQPGGSLRLSCAASGFTFSSYWMYWVRQAPGKGLEWVSAISGNGGS
TYYADAVKGRFTISRDNGKNTLYLQMNSLKAEDTAVYYCAR
>V51RF-ABDC01377653.1-trav |(1660, 1950)|2.58423336032|(0.894,0.864,0.841)|1
MSRGEKLEQSPFLSVQEGDSSVINCTYTETTSTYFYWYKQGPREGLQLIMTIFSYEDKKQ
ERRLSVLLNKMEKHLSLHISDTQPADSAVYFCAVS
>V52RF-ABDC01377655.1-trav |(2230, 2518)|2.2160682612|(0.732,0.740,0.745)|1
VHSQKIEQNPWALSIQEGETAAVTCNYTSYSPAFFQWYRQDPEKGLVFLLLIRENEGEKQ
EGRLKVTFDTKLKQSSFYIADSQPADSAAYLCAA
>V53RF-ABDC01379531.1-trav |(895, 1198)|2.35334389257|(0.908,0.701,0.902)|1
SGMAQKVTQSQPAMWVQEKEAVTLDCTYDTRDSTYYLFWYKQPSSGEMILLIRQDSYNQQ
NATEGRYSLNFQKASKSIKLVISASQVGDSAIYFCALSE
>V54RF-ABDC01379531.1-trav |(6655, 6946)|2.70974188868|(0.880,0.917,0.927)|1
VRSQQKEVDQTPEFLSVSEGAMASLNCTYSNTASRYFFWYRQYSGKGPELLVSIFSTGDK
QEGRFTAQLNKASRYVSLVIRDSQPSDSATYLCAL
>V55RF-ABDC01384522.1-iglv |(5368, 5671)|2.1389894284|(0.932,0.626,0.898)|1
AVSPYELTQPPSVSVTPGQTARIPCSGDKLGEKYVYWYQQKPGQAPVLVIYKDSERPSGI
PERFSGSSSGNTAALTISGAQAGDEADYYCHVWDSSSDH
>V56RF-ABDC01384523.1-iglv |(1675, 1975)|2.64753356618|(0.895,0.879,0.876)|1
SVASQLTQVPAVSVALGQTASITCQGDGLSSDYANWYQQKPGQAPVLLIYGENQRPSGIP
ERFSSSVSGDTATLTISGAQAGDEADYYCQVWDSENNK
>V57RF-ABDC01388284.1-trav |(3312, 3602)|2.47175405241|(0.833,0.762,0.950)|1
VRSQQVVEQTPESLVVSEGTTASLSCTYSDTASQSFLWYRQYSGKGPELLMFIYSTGDKE
EGRFTAQLNKASRNVSLLIRDSQPSDSATYLCAVS
>V58RF-ABDC01388284.1-trav |(7133, 7430)|2.32784172271|(0.870,0.747,0.793)|1
GTWAQRVTQPDGHITVSEGDPLELRCNYSSSVSPYLFWYVQYPNQGLELLLKYTSGNSLV
TGIKSFKAEFNKGETSFHLKKASAHLSDSAQYFCAVS
>V59RF-ABDC01388286.1-trav |(1105, 1402)|2.1407150555|(0.880,0.938,0.602)|1
DTRAQSVTQPDGHVTVFEGDSVELRCNYSYGATPYLFWYVQYPGQGLQLLLQYYSGNTLV
QGIKGFEAEVRKDESSFTLRKPRVHWSDTAEYFCALS
>V60RF-ABDC01391612.1-ighv |(2185, 2509)|2.78120177457|(0.945,0.921,0.920)|1
AHSEVQLVQSGAEVKPPGASVKVSCKASGYTFTSYAMHWVRQAPGQGLEYMGWINTNTGG
TSYAQKFQGRVTMTRDTSTSTAYMELSSLRPEDTAVYYCARDTVLQ
>V61RF-ABDC01393119.1-trav |(29, 326)|2.1407150555|(0.880,0.938,0.602)|1
DTRAQSVTQPDGHVTVFEGDSVELRCNYSYGATPYLFWYVQYPGQGLQLLLQYYSGNTLV
QGIKGFEAEVRKDESSFTLRKPRVHWSDTAEYFCALS
>V62RF-ABDC01394567.1-igkv |(5428, 5726)|2.78595064524|(0.889,0.977,0.992)|1
TRCDIQMTQSPSSVSASPGETVTISCRASQGINNNLVWYQHKPGKPPKSLIYGASNLYPG
VLSRFSGSGSGTDYSLTIRGLETDDAATYYCQQYNSF
>V63RF-ABDC01394567.1-igkv |(9543, 9858)|2.54973520448|(0.931,0.781,0.924)|1
SSGDVVMTQTPLSLPVTPGESVSITCRASQSLQDSDGNTYLNWVLQKPGQPPKRLIYKVS
NGDNGVSDRFSGSGSGTDFTLKISRVEAEDVGVYYCMQASYFP
>V64RF-ABDC01396011.1-igkv |(1607, 1898)|1.87328152557|(0.916,0.522,0.899)|1
CRGEIVLTQSPAFLSGTPGEKATLTCRASQSIGTSLHWYQQKPGQPPKLLVKYASQSVSS
GFSGSGSGTDFTLTISSLKAEDAATYYCQQNNYYP
>V65RF-ABDC01396012.1-igkv |(1397, 1712)|2.22315449|(0.965,0.676,0.889)|1
SSGEIVMTQSPLSLPVTPGEPASISCRSSQSLLHSNGNTYLQWFLQKPGQSPQLLIYLGF
TRASGVPDRFSGSGSGTDFTLKISRVEAEDVGVYYCMQAIQYP
>V66RF-ABDC01398089.1-iglv |(1263, 1573)|2.52930491943|(0.853,0.835,0.843)|1
SLANLVLTQPSSVSGSPGQKVTISCTRSSGDIGGYYVHWHQQRPGSAPTTVIYEDNERPS
GVPDRFSGSIDSSSNSASLTISGLQSEDEADYYCQSYDDSC
>V67RF-ABDC01398089.1-iglv |(8544, 8868)|2.46432630467|(0.879,0.852,0.777)|1
SLSQPVLTQPPSLSASLGASAGLTCTLSSGTVVGGYHISWYQQKPGGPPRYLLRYYSDSD
KHQGSGVPSHFSGSKDASANAGILQVSRLQPEDEADYYCMTYHANS
>V68RF-ABDC01399103.1-trbv |(74, 387)|2.25346041974|(0.785,0.716,0.772)|1
PLDTAVFQTPKYLLTQTGNDVSLKCEQTLGYDTMYWYKQDSTKLLKIMFIYSNKEKILNE
TASNRFSPESPDKAHLNLHINSPEPGDSAVYLCASSYDTALQ
>V69RF-ABDC01399713.1-iglv |(4883, 5179)|2.46269939536|(0.970,0.748,0.930)|1
SWAQSALTQPPSVSGAPGQSVTISCSNIKGSYAHWYQQLPGTAPKLLIYYNSDRASGVPA
RFSGSKSGSSASLTIAGLQAEDEADYYCQSYDSSLDA
>V70RF-ABDC01405194.1-trbv |(1656, 1964)|2.27868460403|(0.828,0.780,0.723)|1
TQTPGHLIRARGQQMTLKCFPVSGHNRVYWYQQTPGQGLQFLIEYYNGEQGQKENISPRF
SGHQFSDYRSELNLSALELGDSALYLCASSFHSPAEPPVVC
>V71RF-ABDC01405197.1-trbv |(141, 429)|2.49962237931|(0.823,0.913,0.798)|1
AMVMQNPRYQVTRVGKTVTLSCSQNMNHDTMYWYQQKLSQAPKLLFYYYDTEFNNETDTS
YNFQPSRPNTSFSSVDIRSPGLGDSAVYLCASSR
>V72RF-ABDC01407894.1-ighv |(4990, 5305)|2.92217179879|(0.989,0.999,0.943)|1
VQCEVQLVESGGGLAQPGGSLRLSCAASGFTFSDYYMSWVRQAPGKGLEWVGFIRNKANG
GTAEYAASVKGRFTISRDDSKSTTYLQMNSLRAEDTALYYCAR
>V73RF-ABDC01410282.1-trav |(2484, 2790)|1.87059966905|(0.601,0.780,0.884)|1
SGMSQQIIQPQLAISKQEGETVELECSYDTSVPYHILYWYKRPPSGEIIYLIHHRIDADT
NATTQGRYSVSFQKATKTIRLIISSSQPEDSATYFCCLRQ
>V74RF-ABDC01417489.1-ighv |(3793, 4108)|2.92960298148|(0.985,0.999,0.951)|1
VQCEVQLVESGGGLAQPGGSLRLSCAASGFTFSDYYMNWVRQAPGKGLEWVGVIRNKANG
GTAEYAASVKGRFTISRDDSKSTAYLQMNSLRAEDTALYYCAR
>V75RF-ABDC01417539.1-iglv |(3342, 3652)|2.74255416232|(0.959,0.941,0.873)|1
SLANIVLTQPSSVSGSPGQKVTLSCTRSSGDIGSSYVSWYQQRPGSAPTTVIYEDNERPS
GVPDRFSGSIDSSSNSASLTISALQSEDEADYYCQSYDDSY
>V76RF-ABDC01418168.1-iglv |(580, 890)|2.18831175165|(0.932,0.748,0.754)|1
SLSQPVVTQPPSLSASPGASARLTCTLRSDISVGGKDMYWYQQKPGSPPRYLLYYYSDSN
KHQGSGVPSRFSGSKDASANAGILHVSGLQPEDEADYYCAV
>V77RF-ABDC01418168.1-iglv |(5505, 5817)|2.67437418995|(0.921,0.901,0.866)|1
SLANLVLTQPSSVSGSPGQKVTISCTRSSGDIGDAYVTWYQQRPGSAPTTVIIGDDQRPS
RVPDRFSGSIDSSSNSASLTISGLQSEDEADYYCQSYGIRNS
>V78RF-ABDC01418168.1-iglv |(8911, 9215)|1.5773310106|(0.749,0.525,0.586)|1
SWAQSGLTQEASVSGSVGHKVTLSCAGNSNNVGSYGVGWYQQVPRGAPKTVMLGTTRPSG
IPDRFSGSRSGNTASLTISGLQPEEEADYYCSTWDRTLS
>V79RF-ABDC01418428.1-trav |(328, 621)|2.62488748934|(0.869,0.848,0.920)|1
VRGGENVGLHPPTLSVQEGDTSVINCSYSDSASSYLLWYKQKLGKSPQSIIDIRSNMGKK
QKGRFTVFLSKTAKHLSLHIAATQPGDSAVYFCAES
>V80RF-ABDC01421861.1-ighv |(7067, 7376)|2.88692102226|(0.938,0.972,0.994)|1
VQCEVQLLESGGGLVQPGGSLRLSCAASGFTFSSYYMSWVRQAPRKGLEWVSYINGDGGY
TNYADAVKGRFTISRDNSKNSLYLQMNNLKAEDTAMYYCAR
>V81RF-ABDC01422153.1-iglv |(2569, 2876)|2.76511408413|(0.910,0.929,0.929)|1
SWAQSALTQPPSASGAPGQSVTISCSGSSSNIGGNYANWYQQLPGTAPKLLIYGNSDRPS
GVPARFSGSKSGSSASLTIAGLQAEDEGDYYCSSWDDSLS
>V82RF-ABDC01423814.1-ighv |(3316, 3625)|2.98496800026|(0.995,0.993,0.997)|1
VQCEVQLVESGGGLVQPGGSLRLSCAASGFTFSSYAMSWVRQAPGKGLEWVSTISNGGGS
TYYTDAVKGRFTISRDNSKNSLYLQMNSLRAEDTALYYCAR
>V83RF-ABDC01429763.1-ighv |(1901, 2192)|1.56287759753|(0.493,0.542,0.712)|1
PPCEWGEGVVASSQMLSLTCAAYTRSVSKYSISWVSLPHGKGLEWIGVIWANGNTNYSPS
IQSRVIISRNTSKNQVFLELRSVIVEDAGTYYCAQ
>V84RF-ABDC01436920.1-trav |(1407, 1731)|2.44727103553|(0.774,0.942,0.894)|1
VSGQNQVEQSPQSLIILEGENGTLQCNHTVSPFNNLRWYKQETGKGPVSLIIMTYSKNKE
SKGRYTATLDANTKQSSLHVTASQLSDSASYICVVSALCFPGTDSQ
>V85RF-ABDC01437312.1-trav |(895, 1195)|2.02878864891|(0.652,0.800,0.661)|1
STVAQKVTQAQPATSMTVGQAVILNCQYETSWPQYYIYWYKQIPSKEMIFLLRQGSTRPS
EKSGRYSLNFEKEDKSINLTISALRLEDSAKYYCALQE
>V86RF-ABDC01440240.1-trav |(775, 1062)|2.09428351076|(0.756,0.612,0.962)|1
GVRGLEVRQSPSVLSVQEGASPTLRCNFSATVTSMQWFLQKSGGSLISLFYMASGTKQNG
RLNSTMNNKELYSTLHITATQLEDSGTYLCAAEE
>V87RF-ABDC01440241.1-trav |(2301, 2594)|2.30676264847|(0.789,0.698,0.903)|1
VRGGENVGLHPPTLSVQEGDTSVINCSYSNSASIYFSWYKKELGKGPQFIIDIRSNRDKK
EEQRFTIFVNKTVKHLSLHIAGTQPGDSAVYFCAES
>V88RF-ABDC01440315.1-trav |(2257, 2544)|1.78260468|(0.676,0.509,0.707)|1
GVRGLDVQQSPSVLSVQEGASPTLRCNFSATVYSMQWFRQNPGGGLINLFFMTSGTKQNG
RLNSTMNSKELYGTLHITATQLEDSGTYLCAVPD
>V89RF-ABDC01440685.1-ighv |(539, 848)|2.15250285872|(0.974,0.964,0.616)|1
AHSEVQLVQSGAQVKPPGASVKVSCKASGYTFTSYYMHWVRQAPGQGLEWVGRINPSSGE
TNYAQKFQGRVTMTRDTSTSTAYMELSSLRPEDTAVYYCAR
>V90RF-ABDC01442374.1-iglv |(1223, 1533)|2.81522818506|(0.945,0.933,0.938)|1
SLTNLVLTQPNSVSGSPGQKVTISCTRSTGSIGGYFVHWYQQRPGSAPTTVIYADDQRPS
GVPDRFSGSIDSSSNSASLTISGLQSEDEADYYCQSYDDSY
>V91RF-ABDC01445022.1-trav |(2658, 2952)|2.89315566288|(0.972,0.978,0.946)|1
SVTQTEGQMLLTERDSLIVNCSYETSQYPSLFWYVQYPGEGPQLLLKAMKANDKGINKGF
EATYNRETTSFHLQKASVHESDSAVYYCALSDTVTG
>V92RF-ABDC01446518.1-igkv |(1290, 1603)|2.46426533589|(0.932,0.858,0.782)|1
SSGDVVMTQTPLSLPVTPGESASISCRASQSLLYSDGNTYLNWFLQKPGQPPKLLIYKIS
NRDSGVSDRFSGSGSGTDFTLKISRVEAEDVGVYYCTQGTKL
>V93RF-ABDC01447974.1-trbv |(971, 1262)|1.85850288774|(0.833,0.732,0.572)|1
AGVTQFPSSEVVEKGQAVTLRCDPISGHEYLFWYRRTVGKEMEFLISFLKDNIQDESGMP
KDRFSAKWTEGTSSTLKIQPAELEDSGVYFCASSL
>V94RF-ABDC01449636.1-iglv |(4939, 5239)|2.65107006276|(0.912,0.874,0.876)|1
SVASQLTQVPAVSVALGQTARITCQGDSLSSYYPNWYQQKPGQAPVLLIYGENQRPSGIP
ERFSSSVSGDTATLTISGAQAGDEADYYCQVWDSENNK
>V95RF-ABDC01454767.1-ighv |(1191, 1500)|2.95964845687|(0.987,1.000,0.974)|1
VQCEVQLVESGGGLVQPGGSLRLSCAASGFTFSSYWMNWVRQAPGKGLEWVADINGDGGS
TNYADAVKGRFTISRDNAKNSLYLQMNSLRAEDTALYYCAT
>V96RF-ABDC01466438.1-iglv |(4568, 4875)|2.76511408413|(0.910,0.929,0.929)|1
SWAQSALTQPPSASGAPGQSVTISCSGSSSNIGGNYANWYQQLPGTAPKLLIYGNSDRPS
GVPARFSGSKSGSSASLTIAGLQAEDEGDYYCSSWDDSLS
>V97RF-ABDC01472745.1-igkv |(710, 1025)|2.00989676739|(0.817,0.671,0.678)|1
SSGDVVMTQTPLSLPVTPGELASISCRASESLLYSDGNTYLNWFVQKPGQPPKRLIYKVS
NRDNGVSDRFSGSGSGTDFTLKISRVEAEDVGVYYCVQGTKLP
>V98RF-ABDC01478578.1-trav |(2035, 2325)|1.73912784855|(0.580,0.659,0.955)|1
VSSQELEQSPRSLIIQEGEDLTINCNSSKTLYGIQWYRQKYGEGGLSFLMLLLKSVEEKS
HEKITARLDEKKQQSSLHITASDPSHSGIYLCGAE
>V99RF-ABDC01480086.1-trav |(1109, 1409)|1.69750784492|(0.707,0.628,0.519)|1
MSGQQVKQIPQFLHIQEGDDFSTYCNSTSTLNGMQWYKQRPGGSPVFLMLLVKGGEVKKE
KRLTAQFGEARKGSSLHITAAQTADVGTYFCAVAQCCP
>V100RF-ABDC01487737.1-trbv |(1203, 1500)|2.07131045334|(0.915,0.857,0.615)|1
SVTAGVTQTPRFQILKTGQNTTLTCTQDTNHEEMYWYRQDPGLGLRLIYYSVGVGITEKG
QVYNGYNVSRSSTETFPLTLESATPSQTSGYFCASSE
>V101RF-ABDC01488042.1-iglv |(970, 1286)|2.30982676049|(0.893,0.666,0.950)|1
SLSQPVLTQPPSASASPGASAKLTCTLSSAHSGYTIAWHQQQPGKAPRYLMRVYSDGSQS
KGDGIPDRFSGSSSGADRYLTISNVQPEDEADYYCQTGDSSGV
>V102RF-ABDC01488632.1-trav |(394, 694)|1.6606515571|(0.754,0.552,0.598)|1
LSGQQVKQIPQFLHIQEGDDFSTYCNSTSTLNGIQWYKQRPGGSPVLLIILVKGGEVKKE
KRLTAQFGETRKGSSLHITAAQTADVGTYFCAVAQCSP
>V103RF-ABDC01490559.1-trbv |(1388, 1679)|2.40698319686|(0.906,0.899,0.725)|1
AGVSQSPRHKVTERGQNVTLSCDPISGHNVLYWYRQTLGQGPQYLVYFQGREATDKSGLR
SERISAERPEGSFSTLKIQLAEQGDSAVYLCASSL
>V104RF-ABDC01491653.1-trav |(356, 647)|2.70974188868|(0.880,0.917,0.927)|1
VRSQQKEVDQTPEFLSVSEGAMASLNCTYSNTASRYFFWYRQYSGKGPELLVSIFSTGDK
QEGRFTAQLNKASRYVSLVIRDSQPSDSATYLCAL
>V105RF-ABDC01492430.1-ighv |(1586, 1908)|1.98015528132|(0.883,0.814,0.591)|1
AHCQVQLVQSGAEVRPPGASVKVSCKASGYTFTSYYMYWMKQAPGQGLEWMRRIDPEDGS
TRYAQKFQGRVTMTATTSTNTAFMELSNLRPEDTAVYYCARHSVT
>V106RF-ABDC01497734.1-trdv |(531, 837)|2.1695657599|(0.746,0.674,0.773)|1
STVAQKVTQVETARSTTVGAVVTLNCQYETSGGAYFFIFWYKQLPSKEMIFLLRQGSDLY
NAKDDQRYSVNFQEEANSIDLTISALRLEDSAKYFCALAE
>V107RF-ABDC01498106.1-iglv |(348, 644)|2.46269939536|(0.970,0.748,0.930)|1
SWAQSALTQPPSVSGAPGQSVTISCSNIKGSYAHWYQQLPGTAPKLLIYYNSDRASGVPA
RFSGSKSGSSASLTIAGLQAEDEADYYCQSYDSSLDA
>V108RF-ABDC01518225.1-ighv |(805, 1115)|1.98086732182|(0.760,0.573,0.780)|1
WRRLSPAWGGSLRLSCAASGFTFSSYGMNWVCQAPGKGLEWVSYIYSSSSIYYADAVKGR
FTISRDNGKNTLYLQMNSLRAEDTAMYYCARDTVRGHHWEP
>V109RF-ABDC01519549.1-trav |(483, 780)|2.12041780209|(0.894,0.906,0.605)|1
DARAQSVTQTDGHVTVFEGDSVELRCNYSYGATPYLFWYVQYPGQGLQLLLQYYSGNTLV
QGIKGFKAEFRKNESSFTLRKPRVHWSDTAEYFCALS
>V110RF-ABDC01522041.1-igkv |(82, 382)|2.78329117012|(0.907,0.954,0.934)|1
ARCDIQMTQSPSSLAASVGDTVTISCRASQGISSWLSWHQQKPGKPPKTLINKASNLESG
VPSRFSGSGSGTDFTLTIKGLQPEDFATYYCQQYDSSP
>V111RF-ABDC01523330.1-igkv |(1251, 1566)|2.23460120657|(0.950,0.649,0.940)|1
SSGEIVMTQSPLSLPVTPGEPASISCRSSQSLLHSNGNTYLYWFLQKPGQSPQPLIYLVS
NRFSGVSDRFSGSGSGTDFTLKISRVEAEDVGVYYCMQDLQTP
>V112RF-ABDC01527872.1-trbv |(327, 624)|2.33918382946|(0.821,0.782,0.758)|1
PLDTAVFQTPKYLLTQTGNNVSLKCGQTLGHDNMYWYKQDATKLLKIMFSYNNQELMVNE
TASNRFSPESPDKAHLNLHINSPEPGDSAVYLCASSD
>V113RF-ABDC01532883.1-trav |(1596, 1893)|1.60475292773|(0.582,0.475,0.593)|1
KTESDRKQVKQSPESLIVHEGSISILKCTYENSAFDYFPWYRQLPGKAPALLIAIRSFDS
EKEDGRFTAFLNKSAKHFSLHITPSQPGDSDAYFCAA
>V114RF-ABDC01533414.1-trav |(231, 518)|2.34415510276|(0.743,0.817,0.902)|1
VNSQQGEENLQALSIQEGENATINCSYTSSINNLQWYRQDAGRGPTLLILIRANKREERH
GRLTATLNPSIKSSSLIITASCAADTATYFCATD
>V115RF-ABDC01533415.1-trav |(1221, 1515)|2.83945058716|(0.932,0.971,0.943)|1
GTDGDSVTQTEGPVTLPEGEALTLNCTYQSNYAAFLFWYVQFQNKEPELLLKSSSETQET
DGRGFQANNNKSDSSFHLKKPSVQLSDSAVYFCAMR
>V116RF-ABDC01542818.1-trav |(328, 615)|2.4438103373|(0.833,0.785,0.835)|1
VSSEDKVVQSPPSMAVHEGDSATLTCNYVVSYFRSLQWYKQEKNAPVFLFTLTSSGIEKK
SGRFSSILDNKELSTLNITATQTGDSAIYFCAVE
>V117RF-ABDC01543158.1-trav |(548, 845)|1.85905969578|(0.775,0.654,0.601)|1
LNGQQVKQIPEFLHIQEGEDFSIYCNSTSTLTTAQWYKQRPGGSPVLLMILVKDGEVKEK
RLTAQFVETRKGSSLHITAAQTADVGTYFCAVAQCSP
>V118RF-ABDC01556235.1-iglv |(1158, 1468)|2.2463102134|(0.850,0.822,0.683)|1
SLSQPVVTQPPSLSASPGASARLTCTLSSGFSVGSYAISWHQQKPGSPPRYLLYYHTDSD
KHQGSGVPSRFSGSKDALANAGILHVSGLQPEDEADYYCAV
>V119RF-ABDC01570800.1-iglv |(151, 463)|2.57527613247|(0.859,0.868,0.849)|1
SLANLVLTQPSSVSGSPGQKVTISCTRSSGDIGDAYVNWYQQRPGSAPTTVIYGDDQRPP
RVPDRFSGSIDSSSNSASLTISGLQSEDEGDYYCQSYGIRNS
>V120RF-ABDC01583217.1-igkv |(589, 904)|2.47198398321|(0.973,0.749,0.937)|1
SSGDIVMTQTPLSLPVTPGEPASISCRSSQSLLHSDGKTYLYWYLQKPGQSPQLLIYLGF
TRASGVPDRFSGSGSGTDFTLKISKVEAEDVGVYYCMQTIQLP
>V121RF-ABDC01598575.1-trbv |(504, 790)|2.2710891153|(0.816,0.691,0.825)|1
AGVTQTPGHLITARGQQVTLKCSPVSGHPSVFWYKQALGEGPQFLIQYYEEKESDKGNFP
ARFSGHQFSDYRSELNLSALELGDSALYLCASS
>V122RF-ABDC01598827.1-trav |(951, 1238)|1.78260468|(0.676,0.509,0.707)|1
GVRGLDVQQSPSVLSVQEGASPTLRCNFSATVYSMQWFRQNPGGGLINLFFMTSGTKQNG
RLNSTMNSKELYGTLHITATQLEDSGTYLCAVPD
>V123RF-ABDC01599688.1-igkv |(938, 1236)|2.54556255928|(0.918,0.980,0.759)|1
IRCDIQMTQSPSSLAASPGETVTISCRASQGISNYLSWYQQKPGKPPKSLIYGASNLHSG
VSSRFSGSGSGTDYSLTIRGLETDDAATYYCQQGHSY
>V124RF-ABDC01610909.1-iglv |(410, 721)|1.84858558956|(0.939,0.513,0.915)|1
AVSPYELTQPPSVSVTPGQTARIPCSGDKLGERYVHWYQQKPGQAPVLVIYGDSNRPSGI
PERFSGSSSGNTAALTISGAQAGDEADYYCQVWDSSSDHLTV
>V125RF-ABDC01281089.1-trbv |(2653, 2950)|2.31620368021|(0.806,0.824,0.718)|-1
PMDTGVTQTPRHLVMGMTDKKSLECGQNLEHNAMYWYKQSAKKALEPLFIFNYKKLYENV
TVPSRFTPEYQDNAHFYLHLDALQPEDSATYLCASSQ
>V126RF-ABDC01281093.1-trbv |(2708, 3003)|1.62478010854|(0.804,0.544,0.629)|-1
TQTPRHLVMGMTDKKSLECEQNLGHNAMYWYKQSAKKAPELMFLCRLQKLTDNLTVPSRF
TPECRDSSHLYLHLDALQPEDSATYLCASSQDTALQ
>V127RF-ABDC01281094.1-trbv |(2622, 2919)|2.41435212578|(0.826,0.793,0.802)|-1
PLDTAVFQTPKYLLTQTGNDVSLKCEQTLGHNSMYWYKQDSTKLLKIMFSYNNQEKILNE
TASNRFSPESPDKAHLNLHINSPEPGDSAVYLCASSD
>V128RF-ABDC01281096.1-trbv |(2097, 2394)|2.32606377279|(0.803,0.878,0.705)|-1
PTDTGVTQTPRHLVMGMTDKKSLKCHQNLGHNAMYWYKLSAKKPPELMFYYYYQALRENM
TVPSRFSPECPDNSHLYLHLDALQPEDSATYLCASSQ
>V129RF-ABDC01281097.1-trbv |(3192, 3492)|2.51585161002|(0.879,0.786,0.885)|-1
HTEPGVIQTPSHQVTKKGQEVILRCDPISGHLYFYWYRQISGQKLEFLVSFYNDNISEKS
ELFTDQFSLKRPKGSYLALKIQSTELEDSAMYFCASSK
>V130RF-ABDC01281097.1-trbv |(8780, 9077)|2.38226825453|(0.803,0.861,0.745)|-1
PLDTAVFQTPKYLLTQMGNNVALKCGQTLGHDYMYWYKQDSTKLLKIMFTYNNQELMLNE
TASNRFSPESPDKAHLNLHINSPEPGDSAVYLCASSD
>V131RF-ABDC01345813.1-ighv |(1734, 2043)|2.80843584382|(0.975,0.949,0.906)|-1
VRCEVQLVESGGGLVQPGGSLRLSCAASGFTFSSYGMHWVRQAPGKGLEWVAVIRYDGSK
QYYADAVKGRFTISRDNSKNMLYLQMNSLKVEDTAMYYCAK
>V132RF-ABDC01345814.1-ighv |(4248, 4551)|2.67799566677|(0.957,0.879,0.886)|-1
VQCDVQLVESGGGLVQPGGSLRLSCAASGFTLSSYGMNWVRQAPGKGLEWVSYIYSSSTY
YADSVKGRFTTSRENSQNMLYLQMNSLRDEDTAMYYCAR
>V133RF-ABDC01345817.1-ighv |(603, 906)|2.79720103418|(0.965,0.971,0.886)|-1
VQCEVQLVQSGGGLVQPGGSLRLSCAASGFTFSSYGMNWVRQAPGKGLEWVSYIYSSSTY
YADSVKGRFTTSRENSQNMLYLQMNSLRDEDTAMYYCAR
>V134RF-ABDC01358932.1-igkv |(615, 919)|2.54275457006|(0.970,0.769,0.954)|-1
SSGDIVMTQTPLSLPVTLGEPASISCRSSQSLLHSDGNSYMCWYLQKPGQSLQPLIYRVS
NRFSGVPDRFSGSGSGTDFTLKISRVEAEDVGVYYCMQD
>V135RF-ABDC01363308.1-ighv |(7252, 7561)|2.14060640202|(0.948,0.964,0.605)|-1
AHSQVQLVQSGAEVRPPGASVKVSCKASGYTFTSYYMHWVKQAPGQGLEWMGRVDPEDGS
TSYAKKFQGRVTMTATTSTNTAFMELSNLRPEDTAVYYCAR
>V136RF-ABDC01368596.1-trbv |(1048, 1348)|2.29722914927|(0.872,0.805,0.723)|-1
HTDAGVIQTPRHEVTEMGQAVTLKCEPISGHDTLLWYKQTLVQGLELLTYFRSQSQIDDA
GMPKGRFSAEMPNASFSTLKIQPTELRDSAVYLCASSS
>V137RF-ABDC01368598.1-trbv |(778, 1085)|1.77720334626|(0.748,0.545,0.664)|-1
AGVTQSPRHKITEKRQSVAFWCDPISGHITLSWYRQTLGKGLEFLIQYQNEAVADDSGLA
KDRFSAERPKGANFTLRIQQAELGDSATYLCASSPATALH
>V138RF-ABDC01368601.1-trbv |(2109, 2406)|2.64407169635|(0.916,0.864,0.880)|-1
SVTAGVTQTPRFQILKTGQNMTLMCTQDTNHDSMYWYRQDPGLGLRLIHYSVAAGTTARG
DIPEGYNVSRSSTETFSLTMESATPSQTSAYFCASSE
>V139RF-ABDC01368602.1-trbv |(3661, 3963)|1.72566771743|(0.797,0.609,0.598)|-1
AGVTQTPGHLIKARGQQVTLKCFPVSGHDQVSWYQQALGQGPQFLIQYYGGQELEKGNFP
ARFSGHQFRDYRSELNLSALELGDSALYLCASSFHSPAE
>V140RF-ABDC01381867.1-igkv |(294, 594)|1.8821539562|(0.644,0.587,0.666)|-1
TTGNTALIQFPEHLTASLGDSVSINCRAGQSISDYLSWYQQKPGQAPKLLIYDADNLYSG
VSSRFTGLQSGTEFILTITNVKADDAATYYCQQDYTVP
>V141RF-ABDC01396906.1-ighv |(901, 1210)|2.9375766041|(0.971,0.981,0.987)|-1
VQCEVQLVESGGGLVQPGGSLRLSCAASGFTFDYYGMNWVRQAPGKGLEWVSYISWNGGS
TYYADAVKGRFTISRDNSKNMLYLQMNSLRAQDTAVYYCAR
>V142RF-ABDC01406436.1-iglv |(5624, 5924)|2.00730875209|(0.640,0.887,0.726)|-1
SVASQLTQVPAVSVALGQTASITCQGDGIRSYYANWYQQKPGQAPVLLIYSDNNRPSGIP
ERSSGSNSGNMATLTMNRAQADDEGDYHCQSFDSRGTL
>V143RF-ABDC01418360.1-iglv |(1917, 2229)|2.36189384605|(0.883,0.766,0.796)|-1
SVAFQLTQVPAVSVALGQTASITCQGEGLSSYYVNWYQQKPGQAPVLIIYTDIFSNSNRP
SGIPERFSSSVSGDTATLTISGAQAQDEADYYCQVWVSENNK
>V144RF-ABDC01419594.1-ighv |(2167, 2489)|2.38278450044|(0.931,0.899,0.720)|-1
AHSQVQLVQSGAEVKPPGASVKVSCKASGYTFTSYYMHWVRQTPGQGLEWMGEINPNSGG
TSYAQKFQGRVTMTRDTSTSTAYMELSSLRPDDTAVYYCARHSAT
>V145RF-ABDC01425625.1-iglv |(109, 419)|2.78145749281|(0.942,0.935,0.909)|-1
SLANFVLTQPSSVSGSPGQKVTISCTRSSGNIGSYYVQWYQQRPGSAPSTVIYKHNKRPS
GVPDRFSGSIDSSSNSASLTISGLQSEDEADYYCQSYDGSY
>V146RF-ABDC01454736.1-trav |(1674, 1968)|2.71355405101|(0.884,0.955,0.895)|-1
RTHGNSVTQTEGQVTLSEKAFLHINCTYTSTGYPSLFWYVQYPGEGPQLLLKAATANDKG
MNKGFEATYKKETTSFHLEKASVHESDSAVYYCAMS
>V147RF-ABDC01455982.1-trbv |(239, 546)|2.6108202031|(0.907,0.907,0.824)|-1
HTDAGITQNPRHKITEIGKQVTLSCHQNDNHFYMYWYRQDLGHGLRLIYYSVDAQSTDKE
EVAEGYKVSRSNKEDFLLFLESATRSQTSVYFCASSEYTA
>V148RF-ABDC01464286.1-ighv |(384, 691)|2.01722301797|(0.938,0.985,0.552)|-1
ALSQVQLVQSGAEMRPPGASVKVSCKASGYTFTSSYMHWVRQAPGQGLEWMGRVDPEDGS
TRYSQKFQGRVTMTATTSTNTAFMELNSLRPEDTAVYYCA
>V149RF-ABDC01465190.1-iglv |(381, 691)|2.85822051637|(0.965,0.925,0.975)|-1
SLANFVLTQPSSVSGSPGQKVTVSCTRSSGNIGSNYVYWYQQRPGSAPTTVIYRDDQRPS
GVPDRFSGSIDSSSNSASLTISGLQSEDEADYYCQSYDGSA
>V150RF-ABDC01471087.1-ighv |(643, 952)|2.94353356618|(0.981,1.000,0.965)|-1
VQCEVQLVESGGGLVQPGGSLRLSCAASGFTFSDYWMNWVRQAPGKGLEWVAHIRYDGSK
QYYADAVKGRFTISRDNSKNSLYLQMNSLRAEDTALYYCAR
>V151RF-ABDC01473375.1-trbv |(1092, 1390)|1.91791728318|(0.835,0.597,0.731)|-1
STDAGVTQTPRNRIANSGQSILLECSQTQDHDRMYWYRRDPGLGLRLIYYSLGVNSTDKG
EVSKGYSVSRKEQAKFSLSLETAFPNQTALYFCASSY
>V152RF-ABDC01473376.1-trbv |(205, 505)|2.45537524763|(0.873,0.860,0.767)|-1
SYDAKVTQTPGHLIKEKGQKASMDCTPQQGHNSLYWYQQSQNKELEFLVYFENKELFDQT
EMHKKRFSSKCPPDSPCRLEILSSEPGDSALYFCASSP
>V153RF-ABDC01491936.1-trbv |(1492, 1778)|1.88402897119|(0.824,0.576,0.734)|-1
AGVTQTPRHLITARGQQVTLKCFPVSGHNQVSWYQQALGQGLQFLIQYFEGEEREKGNFP
ARFSGHQFSDYRSELNLSALELGDSALYLCASS
>V154RF-ABDC01493416.1-ighv |(429, 735)|2.9071530568|(0.948,0.973,0.999)|-1
VQCDVQLLESGGGLVQPGGSLRLSCAASGFTLSSYYMHWVRQAPGKGLEWVSTISSGGST
YYADAVKGRFTISRDNGKSSLYLQMNSLKAEDTAVYYCAR
>V155RF-ABDC01493570.1-iglv |(337, 641)|2.15435024577|(0.682,0.799,0.740)|-1
TSQEVVTQETSLLTTPGGTVTLTCGSSTGAVTTSNYANWVQQGSNEVPRGLIYGTSNRYP
GVPARFSGSLLGDKAALTITGAQAEDEAEYYCALWFSNH
>V156RF-ABDC01504922.1-iglv |(867, 1180)|2.03289725949|(0.808,0.635,0.728)|-1
SLSQPVLTQPPSASASPGASAKLTCTLSSAHGGYGIAWHQQQPGKAPRYLMWLKSDGSHS
KGDGVPDRFSGSSSAADRYLTISNVQPEDEADYYCQTWETGV
>V157RF-ABDC01537099.1-igkv |(1719, 2017)|2.43110464438|(0.768,0.908,0.929)|-1
TRCDIQVTQSPSSVSASPGDTVTISCRASQDISNRLSWYQQKPGKPPKALIYVASNLHSG
VSSRFSGSGSGTDYSLTIRGLETDDAATYFCRQYKNN
>V158RF-ABDC01540867.1-iglv |(1970, 2280)|2.74331605249|(0.957,0.884,0.927)|-1
SLANFVLTQPSSVSGSPGQKVTISCTRSSGNIESSYVHWYQQRPGSAPTTVIYDDNERPS
GVPDRFSGSIDSSSNSASLTISGLQSEDEADYYCQSYDASA
>V159RF-ABDC01560090.1-trbv |(258, 558)|2.7440624075|(0.923,0.963,0.874)|-1
SMDTEVTQSPRYLVKGKEQKTKMDCVPKKGHSYVYWYQKKLEEGLKFLVYLQDEDIIEKE
EIINNRFSAQCPKNSPCILEIQSTESGDSALYFCASSQ
>V160RF-ABDC01562688.1-igkv |(1193, 1508)|2.64148613641|(0.952,0.806,0.966)|-1
SSGDIVMTQTPLSLPVTPGETASISCRASQSIQYSDGNTYLNWFLQKPGQPPKRLIYKVS
NRDSGVSDRFSGSGSGTDFTLTISRVEAEDVGVYYCMQASYYP
>V161RF-ABDC01582683.1-iglv |(809, 1119)|2.44078542064|(0.930,0.941,0.725)|-1
SLSQPVLTQPSSLSASPGASARLTCTLSSGSSVGSYWINWYQQKPGSPPRYLLSYYSDSY
KHQVSGVPSRFSGSKDASANAGILHVSGLQPEDEADYYCAV
>V162RF-ABDC01624510.1-iglv |(99, 409)|2.74331605249|(0.957,0.884,0.927)|-1
SLANFVLTQPSSVSGSPGQKVTISCTRSSGNIESSYVHWYQQRPGSAPTTVIYDDNERPS
GVPDRFSGSIDSSSNSASLTISGLQSEDEADYYCQSYDASA
>V163RF-ABDC01625120.1-trbv |(517, 808)|2.09198638187|(0.722,0.903,0.626)|-1
AGVSQSPRHKVTERGQNVTLSCDPISGHISLYWYRQTPEKGLEFLIYFQREEEGDKSGLR
SDRFSAERPEGSVSTLKIRAAEQGDSTLYLCTSSL
>V164RF-ABDC01653181.1-trbv |(235, 543)|2.27868460403|(0.828,0.780,0.723)|-1
TQTPGHLIRARGQQMTLKCFPVSGHNRVYWYQQTPGQGLQFLIEYYNGEQGQKENISPRF
SGHQFSDYRSELNLSALELGDSALYLCASSFHSPAEPPVVC
>V165RF-ABDC01655862.1-trbv |(462, 762)|2.18977925765|(0.714,0.895,0.704)|-1
HAGAGVSQSPRHKVAEKGQNVTLRCDPISGHDFLYWYRHTLGQGPQFLIYFQDKGVAEQS
KLIGERISAERPEGSFSTLKIRPAEQGDSAVYLCTSSL
>V0RF-JABR01013263.1-trbv |(179, 479)|2.59697240396|(0.911,0.872,0.840)|1
HMGAGVSQSPRYKVTKKGQDVVLSCDPISGHEALYWYQQALGQGPKFLTYFNYEAQPDKS
GLPNDRFSAERPKGSVSTLTIQRTEQRDSAVYLCASSL
>V1RF-JABR01016432.1-igkv |(2840, 3152)|1.67134594047|(0.517,0.603,0.671)|1
VLEAHEALLSPSLSRPRTTMSVSLLLPGSWAQCVLTQPPSVSAAPGQRVTISCSGSSFNF
RRYYVSWYQQLPGAAPKLLIYDVNKRTSGVPERFSGSQSGTS
>V2RF-JABR01016432.1-iglv |(14602, 14908)|1.82833825264|(0.583,0.852,0.687)|1
SLSQPVLTQPPSASASLGASVTLTCTLSSGYSNYAVDWHQQRPGKGPQFVMRVGTGGIVG
SKGDGIPDRFSGSGSGLNRYLTIKNIQEEDESDYHCGADH
>V3RF-JABR01016432.1-iglv |(27490, 27800)|2.56386192625|(0.939,0.892,0.808)|1
SLSQPVLTQPTSLSASPGASARLTCTLSSGINVGSYRIFWYQQKPGSPPRYLLWYKSDSD
KHQGSGVPSRFSGSKDASANAGILRISGLHSEDEADYYCTI
>V4RF-JABR01016432.1-iglv |(31781, 32090)|2.798154612|(0.982,0.883,0.972)|1
SWAQSVLTQPPSASGPPGQSVTISCSGSSSNIGSNYVYWYQQLSGKAPKLLIYDNNKRPS
GVPDRFSGSKSGTSASLAISGLQTEDEADYYCAAWDDSLSG
>V5RF-JABR01020048.1-igkv |(1483, 1801)|2.44479359977|(0.974,0.758,0.903)|1
AYGDIVMTQSPDSLAVSLGERVTINCKSSQSLLYSSNNKNYLAWYQQKPGQAPKLLIYWA
STRESGVPNRFSGSGSGTDFTLTISGLQAEDMAVYYCQQYYSTP
>V6RF-JABR01043229.1-iglv |(142541, 142835)|2.6594498032|(0.850,0.930,0.930)|1
VVTQEPLLSVSSGGTVAITCGLSSGPVSTSNYPSWYQQTPGQAPRTLIYSTNTRPSGVPD
RFSGSILGNKAALTITGAEADDESDYYCVLYMGSGI
>V7RF-JABR01052882.1-trgv |(79087, 79393)|2.03572196662|(0.864,0.731,0.661)|1
RTKSVTRPAGSSAEITCDFSGDSNLYIHWYLHQEGKAPQRLLYYEPYYFKVVLESGISPG
KYDTASTRKSWNLRLQNLIENDSGVYYCATWDRHHDSDLP
>V8RF-JABR01052882.1-trgv |(83822, 84131)|2.26379793802|(0.798,0.752,0.737)|1
RTKSVTRPAGSSAEITCDLPEFSSFYIHWYLHQEGKAPQRLLYCDSSNSRVVLESGISPG
KYDTYVSTRRNLRLRLRNLIENDSGVYYCANWDRHSDSDLL
>V9RF-JABR01052882.1-trgv |(88181, 88494)|2.34274449547|(0.953,0.762,0.826)|1
SQKSSNLEGRTKSVTRPTGSSAEITCDFSGDSNFYIHWYLHQEGKAPQRLLYYDVSNSRD
VLESGLSLGKYYTHTRTRWSWILILRNLIENDSGVYYCATWD
>V10RF-JABR01058206.1-iglv |(329, 636)|1.87864086963|(0.857,0.933,0.504)|1
SNSQAVVTQEPSLTVSPGGTVTLTCGSSTGAVTSGNYPHWFQQKPGQAPKTLIYDTNNKL
SWTPARFSGSLAEGKAALTLSGAQPEDEAEYYCLLYYSDA
>V11RF-JABR01059011.1-ighv |(294, 609)|2.99296000066|(0.997,1.000,0.996)|1
VQCEVQLVESGGGLVQPGGSLRLSCAASGFTFSNYHMSWVRQAPGKGLEWVGFIRNKASG
GTAEYAASVKGRFTISRDDSKSITYLQMNSLKTEDTAVYYCAR
>V12RF-JABR01059011.1-ighv |(15565, 15872)|2.81494466482|(0.923,0.963,0.936)|1
VQCEVQSVESGGGLVQPGGSLRLSCAASGFTFSSYWMSWVRQAPGKGPEWVSDISGSTIY
YADSVKGRFTVSRDDAKNSLSLQMDSLRAEDTAVYYCARE
>V13RF-JABR01059011.1-ighv |(21883, 22172)|1.93622274795|(0.747,0.547,0.969)|1
WGSLRLSCAASGFTFSSYDMHSIRQAPGKGLQWISVISTSGGTIYYADSVKGRFTISRDN
AKNSLYLQMSSLRAEDTAVYYCARDTVRGSQYEQ
>V14RF-JABR01059012.1-ighv |(2630, 2952)|2.43027596747|(0.938,0.864,0.764)|1
VFSQVTLKESGPALVKPTQTLTLTCTFSGFSLSTSGMRVSWIRQPPGKALEWLALIYWDD
DKRYSPSLKSRLTISKDTSKNQVVLTMTNMDPVDTATYYCAQGAQ
>V15RF-JABR01059012.1-ighv |(17062, 17386)|2.73517496839|(0.973,0.933,0.874)|1
AHSQVQLVQSGAEVKQPGASVKVSCKASGYTFTSYAMNWVRQAHGQRLEWIGWINTNTGN
PTYAQGFKERFAFSMDTSISTAYLQISSLKAEDTAVYYCARDTVWK
>V16RF-JABR01062345.1-ighv |(2435, 2744)|2.81378802605|(0.961,0.947,0.915)|1
AQSQEQLVQSGAEVKKPGASVKVSCKASGFTFSSDAISWVRQAPGQGLEWMGRIIPILSR
TNYAQKFQGRVTITADTSTSTAYMELSSLRSEDTAVYYCAR
>V17RF-JABR01066987.1-ighv |(11840, 12146)|2.94880001921|(0.981,0.988,0.980)|1
VQCEVQLTESGGGLVQPDGSLRLSCAASGFTFSSYAMQWVHQAPGKGLEWVSAIGPGGDT
YYADAVKGRFTISRDNTKNSLYLQMNSLRAEDTAVYYCAR
>V18RF-JABR01066987.1-ighv |(19343, 19652)|2.71350783492|(0.947,0.950,0.852)|1
AHSQEQLVQSGAEVKKPGASVKVSCKASGFTFDSSAISWVRQAPGQGLEWMGVIIPVAGI
TNYAQKFQGRVTITADTSTSTAYMELSSLRSEDTAMYYCAA
>V19RF-JABR01070187.1-ighv |(4809, 5118)|1.92354443064|(0.905,0.547,0.876)|1
AHSQVQLVQSGAEVKKPGSSVKVSCKASGYTFTDYYMHWVRQAPGQGLERMGWINTGSGS
TGYAQKFQGRVTMTRDTSTSTAYMELSSLRSEDTAVYYCTT
>V20RF-JABR01070187.1-ighv |(7644, 7959)|2.7071064571|(0.883,0.996,0.878)|1
VQCEVQLVESGGGLVQPGGSLRLSCAASGFTFSDYYMQWVRQAPGKGLQWVGLIRNKANG
GTTDYSVSVKGRCTISRDDSKSITSLQMNSLKTEDTAVYYCAR
>V21RF-JABR01070187.1-ighv |(14433, 14739)|2.89585385296|(0.983,0.990,0.933)|1
VQCEMQLVESGGGLVQPGGSLRLSCAASGFTFSSYDMHWVRQAPGKGLEWVSAISIGGGT
YYPDSVKGRFTISRDNAKNSLYLQMNSLRAEDMAVYYCAR
>V22RF-JABR01071187.1-ighv |(5669, 5983)|2.19868932428|(0.864,0.621,0.961)|1
VLSQVTLKESGPALVKPTQTLTLTCTFSGFSLSTSGMGVGWIRQPPRKALEWLAHIYWDD
DKYYSASLKSRLTISKDTSKNQVVLTMTNMDPVDTATYYCARI
>V23RF-JABR01071886.1-ighv |(1825, 2139)|2.64766361436|(0.877,0.845,0.952)|1
VWSQVTLKESGPALVKPSQTLTLTCTFSGFSISTSGTGVGWIRQPSGKALEWLASIYWND
SKYYSTSLKSRLTISKDTSKNQVVLTMTNMDPVDTATYYCAHI
>V24RF-JABR01074704.1-ighv |(2136, 2448)|2.95579201242|(0.986,0.990,0.980)|1
VLSQVQLQESGPGLVKPSETLSLTCAVSGGSISSYNYWSWIRQPPGKGLEWIGHIYGNSA
STNYNPSLKSRVTISKDTSKNQFSLKLSSVTAADTAVYYCAR
>V25RF-JABR01074958.1-ighv |(126, 441)|2.48094678704|(0.930,0.734,0.964)|1
VQCEVQLVESGGGLVQPGGPLRLSCAASGFTFSDYYMPWVRQAPGKGLEWVGHIKNKANS
YTTEYAASVKGRFTISRDDSKNTLYLQMNSLKTEDTAVYYCAT
>V26RF-JABR01076259.1-igkv |(8845, 9160)|2.78925764374|(0.965,0.880,0.973)|1
SSGDIVMTQTPLSLPITVGETASISCRSSQSLLSSNGYNYLSWYLQKPGQSLQLLIYYGS
NRASGVPDRFSGSGSGTDFTLKISRVEAEDIGVYYCMQTLQTP
>V27RF-JABR01076260.1-igkv |(856, 1158)|2.45773163337|(0.920,0.839,0.790)|1
STGDVVMTQSPLSLPVTPGEPASISCRSSQSLLHSSGNTYLSWFQQKPGQSPRRLIYKVS
NRDSGVPDRFTGSGAGTDFTLKISRVEAEDVGVYYCMEG
>V28RF-JABR01076260.1-igkv |(17028, 17326)|2.58332806739|(0.977,0.769,0.998)|1
SKGEIVLTQSPAFRSVTPKEKVTITCRASQSIGSSLHWYQQKPDQSPKLLIKYASQSISG
VPSRFSGSGSGTDFTLTINSLEAEDAATYYCQQSSSF
>V29RF-JABR01076261.1-igkv |(12136, 12424)|2.1675792879|(0.981,0.646,0.918)|1
IVLTQSPAILSLSPGERATFSCRASQSIGSNLAWYQQKPGQAPRLLIYGASSRATGIPDR
FSGSGSGTEFTLTISSLEPEDFAVYYCQKYSSSP
>V30RF-JABR01076261.1-igkv |(17937, 18237)|2.66353935197|(0.943,0.894,0.862)|1
VRCDIQMTQSPSFLSASVEDTVTITCQVSQSISNDLAWYQQKPGKSPTLLIYDATNLHPG
FPSRFSGSGSGADYSLTISSLELEDFAAYYCQQEYSYP
>V31RF-JABR01076261.1-igkv |(78882, 79179)|2.69724386056|(0.982,0.826,0.982)|1
RCDIQMTQSPSSLSASVGDRVTITCRASQSFSSSLAWYQQKLGKAPKLLIYGASSLQSGI
PSRFSGSKSGTDFTLTISSLQPEDVAAYYCQQYYSYP
>V32RF-JABR01076261.1-igkv |(91397, 91697)|2.46478747843|(0.953,0.738,0.943)|1
ARCDIQMIQSPSSLPASVGDRVTITCRASQGISSYLNWYQQKPGKAPKLLIYYATTLQSG
VPSRFSGSGSGTEFTLTISSLQPEDFAVCYCQQHNSYP
>V33RF-JABR01076261.1-igkv |(111081, 111379)|2.85809464473|(0.991,1.000,0.900)|1
ARCDIQMTQSPSSLSASVGDRVTITCRASQGISSYLNWYQQKPGKAPKLLIYAASSLASG
VPSRFSGSGSGTEFTLTISSLQPEDFAAYYCQQYNSA
>V34RF-JABR01076261.1-igkv |(121606, 121906)|2.21902251519|(0.962,0.681,0.876)|1
TTGEIVMTQSPATLSLSPGERATLSCRASQSAGSNLAWYQQKPRQAPRLLIYGASSRATG
IPARFSGSGSGTDFTLTISSLEPEDVGIYYCQQYNDWP
>V35RF-JABR01076261.1-igkv |(164504, 164804)|2.96195715951|(0.971,0.998,0.999)|1
ARCDIQMSQSPSSLSASVGDRVTITCQASQGISNALAWYQQKPGKAPKLLIYDASSLDSG
VPSRFSGSGSGTEFTLTISSLQPEDFATYYCQQYNSDP
>V36RF-JABR01076263.1-igkv |(15350, 15650)|2.86738189872|(0.986,0.998,0.908)|1
ARCDIQMTQSPSSLSASVGDRVTITCQASQGISSYLSWYQQKPGKAPKLLIYKASSLASG
VPSRFSGSGSGTEFTLTISSLQPEDFAAYYCQQHNSLP
>V37RF-JABR01076263.1-igkv |(29170, 29470)|2.33597683759|(0.953,0.738,0.853)|1
ARCDIQMIQSPSSLPASVGDRVTITCRASQGISSYLNWYQQKPGKAPKLLIYYATTLQSG
VPSRFSGSGSGTEFTLTISSLQPEDFAAYYCLQHNSDP
>V38RF-JABR01076263.1-igkv |(35502, 35802)|2.9546404731|(0.994,0.982,0.980)|1
ARCDIQMTQSPSSLSASVGDRVTITCQASQGISSWLAWYQQKPGKAPKLLIYKASSLQSG
VPSRFSGSGSGTEFTLTISSLQPEDFATYYCQQHNSNP
>V39RF-JABR01076263.1-igkv |(51711, 52011)|2.67475591569|(0.976,0.895,0.872)|1
TTGEIVMTQSPATLSLSPGERATLSCRASQSVSSRLVWYQQKHGQAPTLLIYGASSRATG
IPARFSGSGSGTDFTLTISSLEPEDVGVYYCQQDYSWP
>V40RF-JABR01076263.1-igkv |(105623, 105923)|2.99799200002|(1.000,0.999,0.999)|1
ARCDIQMTQSPSSLSASVGDTVTITCQASQGISSYLAWYQQKPGKAPKLLIYAASTLQSG
VPSRFSGSGSGTDFTLTISSLQPEDFATYYCQQYNSNP
>V41RF-JABR01076263.1-igkv |(125399, 125698)|2.66539010128|(0.901,0.879,0.888)|1
TTGEIVMTQSPATLSLSPGERATLSCRASQSVGSYLAWYQQKPGQAPRLLIYGASSRATG
IPDRFSGSGSGTEFTLTISSLEPEDFAVYFCQHYNNWN
>V42RF-JABR01076264.1-igkv |(9604, 9904)|2.47674996833|(0.982,0.974,0.736)|1
ARCDIQMTQSPSSLSASIGDTVTITCHASQSISSWLAWYQQKPGKAPKLLIYKASSLQSG
VPSRFSGRGSGTDFTLTISSLQPEDFATYYCQKCNSNP
>V43RF-JABR01076265.1-igkv |(8185, 8485)|2.36468769335|(0.999,0.942,0.714)|1
TTGEIVMTQSPATLSLSPGERATLSCRASQSVSSYLAWYQQKPGQAPRLLIYGASSRATG
IPARFSGSGSGTDFTLTISSLEPEDVAVYYCQQGSNLP
>V44RF-JABR01076266.1-igkv |(4594, 4894)|2.99594800078|(0.997,1.000,0.999)|1
ARCDIQMTQSPSSLSASVGDRVTITCQASQGISNYLAWYQQKPGKAPKLLIYKASTLQSG
VPSRFSGSGSGTDFTLTISSLQPEDFATYYCQQGNSYP
>V45RF-JABR01076266.1-igkv |(22548, 22848)|2.96229965252|(0.997,0.997,0.971)|1
ARCDIQMTQSPSSLSASVGDRVTITCQASQGISSYLAWYQQKPGKAPKLLIYDASTLQSG
VPSRFSGSGSGTDFTLTISSLQPEDFAAYYCQQGNSNP
>V46RF-JABR01080842.1-trav |(1737, 2024)|2.23821093267|(0.774,0.742,0.733)|1
LSGEDQVTQSPEALRLREGESSSLNCSYTVSSLRGLLWYRQDPGKGPEFLFILYSAGEEK
EKERLKATLTKKESFLHITGPKPEDSATYLCAVQ
>V47RF-JABR01088351.1-igkv |(10561, 10879)|2.67455812926|(0.987,0.823,0.968)|1
TSGDIVMTQTPLSLPVTPGEPASISCRSSQSLLDSDDGYTYLDWYLQKPGQSPQLLIYEV
SNRASGVSDRFSGSGSGTDFTLKISRVEAEDVGVYYCMQSIEYP
>V48RF-JABR01088351.1-igkv |(62711, 63011)|2.95774839429|(0.978,0.990,0.991)|1
ARCDIQMTQSPSSLSASVGDRVTITCRASQSINKELSWYQQKPGKAPTLLIYAASSLQTG
VSSRFSGSGSGTDFTLTISSLQPEDVATYYCLQDYTTP
>V49RF-JABR01088351.1-igkv |(74390, 74708)|2.19733279507|(0.841,0.633,0.893)|1
SSGEIVMTRTPLSLPITPGEPASISCRSSQSLMDGDDGFTYLYWYLQKPGQSPQLLMHFA
SYRASGVPDRFSGSGSGTDFTLEISKVEAEDIGVYYCMQALELP
>V50RF-JABR01088351.1-igkv |(103867, 104182)|2.40906492836|(0.985,0.707,0.983)|1
SSGDIVMTQTPLSLPVIPGEPASISCRSSQSLLHSNGYTYLDWYLQKPGQSPQLLIYLGS
NRASGVPDRFSGSGSGTDFTLKISRVEAEDVGVYYCMQALEFP
>V51RF-JABR01088351.1-igkv |(113703, 114003)|2.78574112338|(0.989,0.937,0.901)|1
ARCDIQMTQSPSSLSASVGDRVTITCRASQGISNDLAWYQQKLGETPKLLIYDASSLQSG
IPSRFSGSGSGADFTLTISSLQPEDFATYYCQHYYSAP
>V52RF-JABR01088351.1-igkv |(136166, 136466)|2.98085201038|(0.996,0.990,0.995)|1
ARCDIQMTQSPSSLSASVGDRVTISCQASQNIYSNLGWYQQKPGKAPKLLIYAASTLQSG
VPSRFSGSGSGTDFTLTISSLQPEDVATYYCQHGYSTP
>V53RF-JABR01088351.1-igkv |(159354, 159654)|2.97408440501|(0.996,0.981,0.998)|1
ARCDIQMTQSPSSLSASVGDRITITCQASQGISNDLAWYQQKPGESPKLLIYEASSLQSG
IPSRFSGSGSGTDFTLTISSLQPEDFATYYCQHYYSTP
>V54RF-JABR01088351.1-igkv |(170244, 170542)|2.93295210999|(0.994,0.971,0.972)|1
ARCDIQMTQSPSSLSASVGDRVTISCQASESISDYLNWYQQKPGKAPKLLIYAASTLQSV
VPSRFSGSGSGTDFTLTISSLQPEDFATYYCQHGYGT
>V55RF-JABR01089346.1-ighv |(860, 1169)|2.86140802357|(0.973,0.991,0.913)|1
AQSQVQLVQSGAEVKKPGASVKVSCKASGYNFRSYAISWVRQAPGQGLEWMGVIIPIRSR
TSYAQKFQGRVTITADTSTSTAYMELSSLRSEDMAVYYCAR
>V56RF-JABR01090264.1-ighv |(61, 375)|2.351469452|(0.868,0.686,0.945)|1
VWSQVTLKESGPALVKPTQTLTLTCTFSGFSISTSGTGMGWIRQPSGKALEWLASIYWNY
SKYYSTSLKSRLTISKDTSKNQVVLTMTNMDPVDTATYYCAHI
>V57RF-JABR01091180.1-ighv |(15340, 15652)|2.75098949566|(0.977,0.849,0.989)|1
VLSQVQLQESGPAVVKPSETLSLTCAVSGGSISSYYYWSWIRQPPGKGLEWIGYIYGSGG
STYYNPSLKSRVTISTDTSKNQFSLKLSSVTAADTAVYYCAR
>V58RF-JABR01091180.1-ighv |(60296, 60605)|2.92600449196|(0.962,0.988,0.980)|1
VQCEVQLVESGGGLVQPGGSLRLSCAASGFTFSSYWMSWVRQAPEKGLEWVSYINSDGSS
TSYADSMKGRFTISRDNAKNSLYLQMNSLRAEDRAVYYCVR
>V59RF-JABR01091180.1-ighv |(68033, 68348)|2.9368997325|(0.992,0.966,0.982)|1
VQCEVQLVESGGGLVQPGGSLRISCAASGFTFSSSAMHWVRQASGKGLEWVGRIRSKSKN
YATDYAASVKGRFTISRDDSKNTAYLQMNSLKTEDTAVYYCTT
>V60RF-JABR01091180.1-ighv |(78923, 79238)|2.96459608|(0.992,0.991,0.982)|1
VQCEVQLVESGGGLVQPEGSLRLSCAASGFTFSSYYMHWVRQAPGKGLEWVGLIKNKANS
YTTEYAASVKGRFTISRDDSKNTLYLQMSSLKTEDTAVYYCAR
>V61RF-JABR01092448.1-trbv |(783, 1083)|2.30907668961|(0.873,0.805,0.729)|1
HTDAGVIQSPRHEVTEMGKEVTLRCEPISGHSSLFWYRQTMMRGLEFLIYFNNKSPIDDS
GMPKDRFSAKMPDASFSTLRIQPSEPRDSAVYFCASSL
>V62RF-JABR01092448.1-trbv |(15339, 15639)|2.1361639951|(0.831,0.903,0.606)|1
LIDAGVTQTPRHKVTEIGQEVTMRCQPILGHNTVFWYRQTMMQGLELLVYLRNKASLDDS
GMPKDRFSAEMPDASLATLKIQPSEPRDSAVYLCASGL
>V63RF-JABR01092448.1-trbv |(22332, 22623)|1.97625488262|(0.919,0.740,0.665)|1
PGVTQFPSHRVIEKGQTVTLRCDPISGHDYLYWYRRVIGKEIKFLIYFMRASMQDESGMP
KKRFSAERTGGTYSTLKLQPAELEDSGVYFCASSQ
>V64RF-JABR01092448.1-trbv |(27430, 27727)|1.94837430849|(0.866,0.789,0.586)|1
HGDVMVIQNPRYQVTQSGKPVTLSCSQNLNHKVMYWYQQKPSQAPKLLFHYYDKDFNNEA
DTPDNFQSRRPNTSFCFLDIRSPGLEDAAVYLCASSK
>V65RF-JABR01092448.1-trbv |(32724, 33024)|2.41141285881|(0.862,0.810,0.778)|1
SPGEEVTQTPKHLVKGEGQKAKLYCAPITGHSYVFWYQQVLKKEFKFLISFQNEDVVDET
QMPKERFSAKCPRNSPCSLEIQATKLKDSATYFCASSQ
>V66RF-JABR01092448.1-trbv |(36576, 36873)|1.67719460173|(0.545,0.722,0.529)|1
HSEPGVSQTPGHKVTKMGQEVILRCDPSSGHIFVHWYRQNLRQEMKFLISFEYQNNAVDS
GMPKERFTAERTNRTSSTLKIHPAEPKDSAMYLRSSG
>V67RF-JABR01092448.1-trbv |(49780, 50076)|2.248476495|(0.856,0.731,0.759)|1
LSNAGITQNPRHLVRRRGQEARLRCSPMKGHSHVYWYQQLPEEGLKFMVYLQKEKIIDES
GMPKERFSAEFPKEGPSILRIQQAEQEDSAAYFCASS
>V68RF-JABR01092448.1-trbv |(70823, 71123)|2.30207186298|(0.914,0.674,0.920)|1
STDTKVTQRPRLLVKANEQKAKMECVPIKGHSYVYWYRKKLDEELKFLVYFQNEVIIQKA
EIINERFSAQCPQNSSCTLEIQSTESGDAALYFCASSK
>V69RF-JABR01092448.1-trbv |(79737, 80037)|2.54591874586|(0.879,0.829,0.851)|1
SFHAKVTQTPGYLVKGKGQKTKMDCTPEKGHTFVYWYQQNQNKEFTFLISFQSEQVLQET
ELHKKRFSSQCPKNPPCSLEILSSEPGDTALYLCASSQ
>V70RF-JABR01092448.1-trbv |(88946, 89244)|2.71000062456|(0.904,0.936,0.877)|1
SMDADVTQTPRNMIAKTGKRIMLECSQTKGHDQMYWYRQDPGLGLRLIYYSFDVKDINKG
EISDGYSVSRQEQAQFSLSLESATPNQTALYFCATSD
>V71RF-JABR01092448.1-trbv |(97426, 97723)|2.66381023297|(0.885,0.939,0.855)|1
LMEADIYQNPRHRVIGTGKKITLECSQTMGHDKMYWYQQDPGMELHLIHYSYGVNSTERG
DFSSESTVSRIRIEHFPLTLESASPSHTSQYLCASSE
>V72RF-JABR01092448.1-trbv |(131672, 131969)|1.94878409567|(0.738,0.741,0.573)|1
PLEAQVTQNPRHLITVTGKKLTVTCSQNMNHEYMSWYRQDPGLGLRQIYYSINVEVIDKG
DIPEGYNVSRKEKTNFPLILESPSPSQTSLYLCASSL
>V73RF-JABR01092448.1-trbv |(137251, 137558)|2.49977966077|(0.878,0.767,0.906)|1
LVDVKVTQSSRHLIKRMGEKVFLECVQDMDHERMFWYRQDPGLGLQLIYFSYDVKVNEKG
DIPEGYSVSREKKERFSLILGSASTNQTSMYLCASSLSTA
>V74RF-JABR01094257.1-igkv |(894, 1187)|2.63549015591|(0.924,0.880,0.857)|1
LASISCRSSQSLLHSDGKTYLNWYLQKPGQSPQLPIYTVSNQASGVQERFSGSGSGTDFT
LKISRVEAEDVGVYYCMQDTQIPPIVIQPLLEWLSC
>V75RF-JABR01095741.1-trbv |(135018, 135328)|1.85527372361|(0.576,0.686,0.703)|1
SMDTGITQTPKYLVTGMGSKRMMKREHLGHDSLYWLREKAKKSLEFMFYYNCKELIENKT
VPSHFTPECPDSSRLYLHVFALQPEDSALYLCASSQDTALQ
>V76RF-JABR01095741.1-trbv |(145128, 145425)|2.24204392204|(0.874,0.910,0.648)|1
SLDTAVSQTPKYLVTQMGKKESLKCEQNLGHDTMYWYKQDSKKLLQIMFSYNNKELIINE
TVPNRISPDSPDKAHLILHIKSLELGDSAVYFCASSQ
>V77RF-JABR01095741.1-trbv |(149740, 150037)|2.38737632511|(0.871,0.793,0.780)|1
PTDAGVTQTPKHLVMGMTNKKSLKCEQHMGHRAMYWYKQKAKKPPEIMFMYNYEQLSINE
SVPSRFSPECSKSSLLNLHLQALQPEDSALYLCASSQ
>V78RF-JABR01095742.1-trbv |(5779, 6070)|2.67220206414|(0.928,0.906,0.859)|1
PEVTQTPSHRVTQMGQEVILRCVPISNHLYFYWYRQILGQKVEFLVYFYNDEISEKSEIF
DDRFSVGRPDGSNFTLKIKSTKLEDSAMYFCASSE
>V79RF-JABR01095742.1-trbv |(13381, 13693)|2.15354475325|(0.839,0.845,0.630)|1
SLDTAVSQTPKYLVTQMGKKESLKCEQNLGHDAMYWYKQDSKKLLKIMFSYNNKELILNE
TVPNRISPDSPDKAHLILHIKSLELGDSAVYFCASTKAQPCR
>V80RF-JABR01095742.1-trbv |(21882, 22173)|2.04763658929|(0.858,0.784,0.624)|1
PEVTQTPSHQVTRMGQEVILWCVPISNHFYFYWYRQILGQKVEFLVSFVNDNISEKSKIF
DDRFSVERPDGSNFTLKIKSTKLEDSAMYFCASSE
>V81RF-JABR01095742.1-trbv |(32732, 33020)|2.29641530893|(0.809,0.828,0.704)|1
TGVTQTPKHLVMGMTNKKSLKCEQHLRHNAMYWYKQKAKKPPELMFSFNYEKLSLNESVP
SRFSPECSKSSLLYLHVHALQPEDSALYLCASSQ
>V82RF-JABR01189674.1-iglv |(736, 1045)|2.76277652089|(0.904,0.925,0.941)|1
SWAQSVLTQPPSASGAPGQSVTISCSGSSSNIRGNGVHWYQQLSGTAPKILIYNNNQRPS
GVPDRFSGSKSGTSASLAITGLRSEDEADYYCEAWDDSLSA
>V83RF-JABR01196792.1-trbv |(5405, 5708)|2.49995548559|(0.844,0.777,0.919)|1
SVFSALVSQKPSRDVCQRGTSVTIQCQVDSQVTMMFWYRQQPGQSLTLIATANQGSEATY
EGGFVIDKFPISRPNLTFSTLTVSNTSPEDSSIYLCSVE
>V84RF-JABR01004697.1-ighv |(11840, 12149)|2.91786978086|(0.990,0.957,0.976)|-1
VQGEVQLVESGGGLVQPGGSLRLSCAASGFTFGDYAMSWVRQAPGKGLEWVSYISSASST
IYYADSVKGRFTISRDNAKNTLSLQMNNLRAEDTAVYYCAK
>V85RF-JABR01004697.1-ighv |(62563, 62872)|2.05444644659|(0.705,0.723,0.643)|-1
AQSQVQLVQSGAEVRKPGDSVKVSCKASGYTFTNHNVDWVRQAPGQGLVWMGGINTNTGG
TSCAQTFQGRVTMTRDTSTSTAFMELSCLRSEDTAVYYCAR
>V86RF-JABR01004697.1-ighv |(71645, 71954)|2.67084346526|(0.931,0.976,0.820)|-1
AHSQVQLVQSGAEIKQPGASVKVSCKASGYTFTSYYMHWVRQAPGQGLEWIGLISPYNGN
TGYAQNFQGRVTMTTDTSTSTGYMEMSSLRSEDTAVYYCTR
>V87RF-JABR01004698.1-ighv |(7380, 7689)|2.70015457633|(0.882,0.880,0.966)|-1
VQCELQLVESGGDLVQPGGYMRLSCAASGFTFSNYCISWVCQAPEKGLEWVSRINRDGSS
TYYADSMKGQVTISRENAKNTLYLQMNNLRAEDKAVYYCTR
>V88RF-JABR01004698.1-ighv |(16088, 16403)|2.95585291224|(0.995,0.967,0.997)|-1
VQCEVQLVESGGGLVQPGGSLRLSCAASGFTFSSSAMHWVRQASGKGLEWVGRIRSKSNN
YATDYAASVKGRFTISRDDSKNTLYLQMNSLKTEDTAVYYCTT
>V89RF-JABR01011024.1-ighv |(77, 386)|2.94324594723|(0.983,0.963,1.000)|-1
VQCEVQLVESGGGLAKPAGSLRLSCAASGFTFSSYGMHWVRQAPGKGLEWVSYINSGGGS
TRYADSVKGRFTISRDNAKNTLYLQMDSLRAEDTAVYYCAR
>V90RF-JABR01032523.1-igkv |(5692, 6004)|2.40974062285|(0.777,0.807,0.851)|-1
CNGDIVLTQSPASLAVSPGQRATITCRASESVNFFGINLIHWYQQKPGQPPKLLIYQVSN
KDTGVPARFSGIGSGTDFTLTINPVEADDAANYYCLQSKNFP
>V91RF-JABR01035059.1-ighv |(16381, 16696)|2.96731671213|(0.980,0.995,0.994)|-1
VQCEVQLVESGGGLVQPGGSLRLSCAASGFTFSNYWMGWVRQAPGKGLEWVGRIKKTTDG
GTAEYAASVKGRFTISRDDSKNTLYLQMNSLKTEDTAVYYCAR
>V92RF-JABR01035059.1-ighv |(36195, 36504)|2.79507683824|(0.980,0.870,0.993)|-1
VQGEVQLVESGGGLAKPAGSLRLSCAASGFTFSSYWMNWVRQAPGKGLEWVSAINSGGGS
TYYADSVKGRFTISRDNSKNMLYLQMNNLRAEDTAVYYCAR
>V93RF-JABR01035060.1-ighv |(7723, 8038)|2.88815776902|(0.970,0.941,0.981)|-1
VKCEAQLMESGGGLVQPGGSLRLSCAASGFTFSDHYMQWVRQAPGKGLEWVGLIRNKADG
ETTDYAASVKGRVTISRDDSKSITYLQMSSLKTEDTAVYYCAR
>V94RF-JABR01035060.1-ighv |(11223, 11532)|2.88520600457|(0.990,0.925,0.987)|-1
VLSQVQLQESGPGLVKPSETLSLTCAVSGGSLSGYYWGWIRQPPGKGLEWIGYISGSSGS
TNYNPSLKSRVTISTDTSKNQFSLKLSSVTAADTAVYYCAR
>V95RF-JABR01035060.1-ighv |(22673, 22982)|2.75455185437|(0.991,0.850,0.990)|-1
VQGEVQLVESGGGLVQPEGSLRLSCAASGFTFSSYGMSWVRQAPGKGLEWVAVIWYDGSQ
KYYADSVKGRFTISRDNAKNTLYLQMDSLRAEDTAVYYCAK
>V96RF-JABR01035060.1-ighv |(72220, 72544)|2.65322038467|(0.973,0.957,0.817)|-1
CAEVQLVQSGAEVKRPGESLKISCKTSGYSFTSYWISWVRQMPGKGLEWMGMIYPGDSDT
RYSPSFQGQVTISADKSISTTYLQWSSLKASDTATYYCAKDTVRET
>V97RF-JABR01039933.1-trbv |(3008, 3306)|1.71332080522|(0.528,0.658,0.664)|-1
MSAIELVPEHQTVTVSVGNPATLRCSMKGEAISNYYINWYRKTQDNTMTFIYREKGIYGP
GFKDNFQGDIDTEENQAVLKILAPSERDEGSYYCASD
>V98RF-JABR01039935.1-trav |(11370, 11656)|1.68364625803|(0.621,0.493,0.899)|-1
VSAAKNEVEQSPQDLTAQEGEFITINCSYSIGINALHWLQQHPGRGIVSLFMLSSEKKKN
GRLIATINIQERHSSLHITASQPRDSAIYICAV
>V99RF-JABR01039937.1-trav |(16162, 16450)|2.49990510427|(0.805,0.829,0.918)|-1
LSGELKVGQNPLFLSTQEGRNYTVYCNYSTASDRLYWYRQNPGKSLESLFVLLSNGAVKQ
EGRLMASLDTKARLSTLYITAALQDLSATYFCAV
>V100RF-JABR01041956.1-igkv |(1675, 1973)|2.44996334765|(0.789,0.810,0.941)|-1
ILTQSPATLSLSTGEIATLSCRASQSVNRYLAWYQQKPGQAPRLLIYGASSRATGIPDRF
SGSGSGTEFTLTISSLEPEDVGVYHCYQYNSRYPTVI
>V101RF-JABR01049702.1-ighv |(5414, 5728)|2.84170344418|(0.970,0.986,0.904)|-1
VQCEVQLVESGGGLVQPGGSLRLSCAASGFTFSDHYLSWVRQAPGKGLEWVSFMRNNANG
GRTEYAASVKGRCTISRDDSKSITSLQMSSLKTEDTAVYYCAR
>V102RF-JABR01055994.1-ighv |(3382, 3691)|2.85639884577|(0.990,0.995,0.902)|-1
AQSQVQLVQSGAEVKKPGASVKLSCKASGYTFTSYNINWVRQAPGQGLEWMGWINPSSGS
TGYAQNFQGRVTMTRDTSTSTAYMELSSLRSEDTAVYYCAR
>V103RF-JABR01061517.1-igkv |(4119, 4433)|1.7050473846|(0.954,0.676,0.650)|-1
SSGDVVMTQTPLSLPVTPGEPASISCRSSESLLHSNGNTYLHWYLQKPGQSPQLLIYKVT
NRESGVPDRFSGSGSGTDFTLKISRVEPEDVGVYYCMQGTKAP
>V104RF-JABR01061517.1-igkv |(25345, 25645)|2.91921630725|(0.978,0.964,0.978)|-1
ARCDIQMTQSPSSLSASVGDRVTITCRSSQGINNYLSWCQQKPGKAPKPLIYYASSLETG
VPSRFSGSGSGTDFTLTISSLQPEDIATYYCQQYDNLP
>V105RF-JABR01063291.1-ighv |(13950, 14265)|2.7574514862|(0.944,0.987,0.861)|-1
VQCEVQLVESGGGLVQPGGSLRLSCAASGFTFSNHYMHWVHQAPGKGLEWVGFIRNNANG
ATTEYAASVKGRFTISRDDSKSVASLQMNSLKTEDTAVYYCAR
>V106RF-JABR01063291.1-ighv |(28996, 29310)|2.38190776217|(0.807,0.825,0.760)|-1
VLSQVTLKESGPALVKPTQTLTLTCTFSGFSLSTSGMGVGWIRQPPGKALEWLALIYWDD
DKRYSPSLKSRLTISKDTSKNQVVLTMTNMDPVDTATYYCVRR
>V107RF-JABR01064858.1-igkv |(492, 807)|2.54066351878|(0.931,0.797,0.889)|-1
SSGDVVMTQSPLSLPVTPGQPASISCRSSQSLVHSDGNTYLSWFQQKPGQPPRRLIYKVS
NRDSGVPDRFSGSGAGTDFTLKISRVEAEDVGVYYCLQGTYFP
>V108RF-JABR01067077.1-igkv |(7134, 7447)|2.28188689217|(0.921,0.941,0.660)|-1
SSGDVVMTQTPLSLSVTPGEPASISCRSSQSLLHSNGNTYLHWYLQKPGQSPQLLIYKVT
NRESGIPDRFSGSASGTDFTLKINRVEHEDVGVYYCMQSTKF
>V109RF-JABR01068488.1-ighv |(524, 833)|2.82785507227|(0.924,0.966,0.947)|-1
AQSQVQLVQSGAEVKKPGASVKVSCKASGYNFRSSAISWVRQAPGQGLEWMGVIIPILSR
TNYAQKFQGRVTITADTSTSTAYMELSSLRSEDTAVYYCTR
>V110RF-JABR01071814.1-trbv |(24838, 25132)|1.96031156323|(0.785,0.653,0.655)|-1
VRSQTVHQWPATLVQPVGSPLSLECTVEGTSNPNLYWYRQAAGRGLQLLFYSVGVGQISS
EVPQNLSASRPQDRQFILSSKKLLLSDSGFYLCAWS
>V111RF-JABR01071855.1-iglv |(8003, 8306)|2.9588099056|(0.997,0.975,0.989)|-1
SWAQSALTQPPSVSGSPGQSVTISCTGTSSDVGGYNYVSWYQQHPGTAPKLMIYDVSNRP
SGVSDRFSGSKSGNTASLTISGLQAEDEADYYCCSYAGS
>V112RF-JABR01071855.1-iglv |(23097, 23396)|1.58390205583|(0.526,0.753,0.495)|-1
SVISYELTQSPSVSVAPGQMTRITCGESNIGSKSAQWYQQKPGQAPVWVIYGDSRRPSGI
CERFSGSNLENTANLTINRAQAGDEAITVRCGTLVLLI
>V113RF-JABR01071855.1-iglv |(31384, 31694)|2.88909816714|(0.996,0.928,0.984)|-1
SWAQSALTQPRSVSGSPGQSVTISCTGTSNDVGSYNSVSWYQQHPGKAPKLVIYEVSKRP
SGVSDRFSGSKSGNTASLTISGLQAEDEADYYCSSYAGSGT
>V114RF-JABR01071855.1-iglv |(60946, 61249)|2.8344689921|(0.940,0.930,0.968)|-1
SAASYELTQPPSVSVSPGQTARITCSGDTLPDNYAYWFQQKPGQSPVLIIYEDSKRPSGI
PERFSGSSSGTVATLTISGAQVEDEADYYCYSSDSSGNH
>V115RF-JABR01071855.1-iglv |(71726, 72036)|2.81094289672|(0.991,0.889,0.973)|-1
SWAQSALTQPPSVSGSPGQSVTISCTGTSSDIGGYNYVSWYQQHPGTALKLMIYGVSNRP
SGVSDRFSGSKSGNTASLTISGLQAEDEADYYCSSYSSSYY
>V116RF-JABR01071855.1-iglv |(89714, 90006)|2.18697440002|(0.720,0.832,0.688)|-1
CPDSASLSGSSGQLVTISCTGTSSDVGSYNIVSWYQQHPGTGPQLMIYHVSYRPSGVPDR
FSGSKSGNTASMIISGFQVEEEADYYCYSYTSSIT
>V117RF-JABR01071856.1-iglv |(32049, 32337)|2.11662498087|(0.681,0.830,0.691)|-1
SWAQSALTQPRSVSGSPGQSVTISCTGTSSDVGHYNCFLVSSAPRHMIYGVSKWPSGVSD
HFSGSKSGNTVSMTISGLQAEDEADYYCCSYAGS
>V118RF-JABR01071856.1-iglv |(35802, 36107)|2.78144925142|(0.969,0.892,0.946)|-1
SVASYELTQPPSVSVSPGQTAKITCSGDILAKYYAQWYQQKPGQAPVLVIYKDSERPSGI
PERFSGSSSGTTVTLTISRAQAEDEADYYCYSGDDNNLTV
>V119RF-JABR01071856.1-iglv |(45472, 45775)|2.84629443766|(0.993,0.953,0.925)|-1
SWAQSALTQPRSVSGSPGQSVTISCTGTSNDVGSYNSVSWYQQHPGKAPKLVIYEVSKRP
SGVSDRFSGSKSGNTASLTISGLQAEDEADYYCCSYTTS
>V120RF-JABR01071856.1-iglv |(57958, 58263)|2.39780549962|(0.948,0.732,0.898)|-1
FVASYELTQPPSVSVSPRQTARITCGGDNIGSKAVHWYQQKPAQAPVLVIYNDSERPSGI
PERFSGSNSGNTATLTISGVQAGDEADYYCQVWDSSSATV
>V121RF-JABR01071856.1-iglv |(64968, 65271)|2.6325375054|(0.957,0.828,0.918)|-1
SVVSSELTQDPAVSVALGQTVKITCQGDSLSSYYASWYQQKPGQVPVLVIYGNSNRPSGI
PDRFSGSYSGNTASLTITGAQVEDEADYYCGSWDSSGNY
>V122RF-JABR01071856.1-iglv |(85218, 85521)|2.51448543121|(0.983,0.761,0.953)|-1
SAASYELTQPPSESVSPGQTARITCGGDNIGSKAVHWYQQKPAQVPVLVIYSDSNRPSGI
PERFSGSNSGNTATLTISGVEAGDEADYYCQVWDSSSDH
>V123RF-JABR01071856.1-igkv |(89682, 89985)|1.89197681777|(0.751,0.567,0.708)|-1
SVVSSELTQDPALSVALGHTVRITCQGDSLKTYYASWYQQKPGQVPVLVIYGNSNRPSGI
PGRFSSSYSGNTGSLTITAAQVEDEAVYYCHSWDSSGNY
>V124RF-JABR01071856.1-iglv |(104914, 105224)|2.91104630182|(0.989,0.937,0.996)|-1
SWAQSALTQPRSVSGSPGQSVTISCTGTSSDIGGYNLVSWYQQHPGTAPKLVIYDVSKRP
SGVSDRFSGSKSGNTASLTISGLQAEDEADYYCCSYAGSDT
>V125RF-JABR01071856.1-iglv |(114426, 114723)|2.57684466791|(0.865,0.865,0.848)|-1
SVASYELTQPPSVSVSPGQTARITCSGDVLKENYADWYQQKPGQAPVLVIHEDSKRPSGI
PEQFSGSTSGDTNTLTISSSLSEDEADYYCFSGNENN
>V126RF-JABR01071856.1-iglv |(122751, 123054)|2.78452530125|(0.973,0.903,0.934)|-1
SAASYDVTQPQSVSVSPGQTARITCGGDNIGSKAVHWYQQKPAQAPVLVIYDDSERPSGI
PERFSGSNSGNTATLTISGVEAGDEADYYCQVWDSSSDH
>V127RF-JABR01071859.1-iglv |(21796, 22105)|2.76532114428|(0.927,0.888,0.961)|-1
SWAQSVLTQPPSASEAARKSVTISCSGSSSNIGSNRVSWYQQLPGTAPKLLIYNNNQRPS
GVPDRFSGSKSGTSASLAISGLQTEDEADYYCAAWDDSLSS
>V128RF-JABR01071860.1-iglv |(8080, 8387)|2.46645793396|(0.922,0.911,0.748)|-1
SNSQAVVTQEPSLTVSPGGTVTLTCASSTGAVTSGNYPYWFQQKPGQAPTALIYATSSKH
SWTPARFSGSILGGKAALTLSGAQPEDEADYYCSLYYSGA
>V129RF-JABR01071860.1-iglv |(15235, 15523)|2.46494389304|(0.835,0.756,0.951)|-1
SPGASARLTCTLGSGISVGSYSIYWYQQKPGSPPRYLLYYYSDSDKGLGSGVPSRFSGSK
DASANTGILLISGLQSEDEADYYCAVSYSSASHS
>V130RF-JABR01071860.1-iglv |(25888, 26212)|1.5472278236|(0.513,0.662,0.466)|-1
VLEAHEALLSPSLSRPRITMSVSVLLPGSWAQSVLTQPPSVSPDPGQKVTISCSGSSSNI
GRSYVSWYQQLPGIAPKLLIYESNKRPSGISDRFSGSKSGTSASLG
>V131RF-JABR01071860.1-iglv |(31436, 31745)|2.73835457058|(0.975,0.856,0.963)|-1
SWAQSVLTQPPSVSGVPGQKVTISCTGSSSNIGGYYVQWYQQLPGTAPKLLIYQDNKRPS
GVSDRFSGSKSGTSASLAITGLQSEDEADYYCGTWDSSLNG
>V132RF-JABR01071860.1-iglv |(36557, 36866)|2.91721476928|(0.985,0.961,0.974)|-1
SWAQSVLTQPPSVSGAPGQKVTISCTGSSSNIGGYYVSWYQQLPGTAPKLLIYQDNKRPS
GISDRFSGSKSGTSASLAITGLQTEDEADYYCQSYDSSLSG
>V133RF-JABR01071861.1-iglv |(13029, 13339)|2.5039146503|(0.878,0.840,0.810)|-1
SLSQPVLTQPASLSASPGASASLTCTFSGGINVAGYHIHWYQQKPGSPPRYLLWYKSDSD
KHQGSGVPSHFSGSKDASANTGILRISGLQSEDEADYYCAI
>V134RF-JABR01071861.1-iglv |(18449, 18758)|2.79079894835|(0.982,0.890,0.955)|-1
SWAQSVLTQPPSASGIPGQSVTISCSGSSSNIGSNNVYWYQQFPGTAPKLLIYNNNQRPS
GVPDRFSGSKSGTSASLAISGLRSEDEADYYCEAWDDNLSG
>V135RF-JABR01071862.1-iglv |(27039, 27346)|2.28049966864|(0.888,0.926,0.660)|-1
SNSQAVVTQEPSLTVSPGGTVTLTCGSSTGAVTSGNYPYWFQQKPGQAPRALIYNTNSKY
SWTPARFSGSLAEGKAALTLSGAQPEDEAEYYCLLYHSGT
>V136RF-JABR01071862.1-iglv |(60745, 61055)|2.58424956698|(0.964,0.887,0.828)|-1
SLSQPVLTQPASLSASPGASASLTCTFSSGINVAGYTIHWYQQKPGSPPRYLLRYKSDSD
KHQGSGVPSRFSGSKDASANTGILRISGLQSEDEADYYCAI
>V137RF-JABR01071862.1-iglv |(65675, 65984)|2.76277652089|(0.904,0.925,0.941)|-1
SWAQSVLTQPPSASGAPGQSVTISCSGSSSNIRGNGVHWYQQLSGTAPKILIYNNNQRPS
GVPDRFSGSKSGTSASLAITGLRSEDEADYYCEAWDDSLSA
>V138RF-JABR01071862.1-iglv |(83033, 83345)|2.7931824953|(0.985,0.880,0.972)|-1
SWAQSVLTQPPSVSGTPGQRVTISCTGSSSNIGVGYYVSWYQQLPGTAPKLLIYQDNKRP
SGISDRFSGSKSGTSASLAITGLQSEDEADYYCQSYDNSLSG
>V139RF-JABR01071862.1-iglv |(111105, 111415)|2.76647022872|(0.969,0.885,0.943)|-1
SLSQPVLTQPTSLSASPGASARLTCTLSSGINVGSYRIFWYQQKPGSAPRYLLSYYTDSD
KHQGSGVPSRFSGSKDASANAGILLISGLQSEDEADYYCMI
>V140RF-JABR01071862.1-iglv |(116435, 116744)|2.79308850952|(0.950,0.915,0.934)|-1
SWAQSVLTQPRSASGTPGQRVTISCSGSSSNTGSNYVSWYQQLPGTAPKPLIYYDDKQAS
GVSDRFSGSKSGTSASLAISGLQSEDEADYYCATWDNSLSG
>V141RF-JABR01077598.1-iglv |(2147, 2457)|2.16521010796|(0.901,0.675,0.808)|-1
SLSQPVLTQSPSASASLGASVKLTCTLSSGHSSYTIAWHQQQPEKAPRYLMKLNSDGSHS
KGDGIPDRFSGSSSGAERYLTISNLQSEDEADYYCQTWDTG
>V142RF-JABR01077599.1-iglv |(29510, 29828)|2.01228376514|(0.892,0.752,0.651)|-1
SLSQPVLTQPPSLSASLGASARLTCTLSSDISVGGKIVYWYQQKPGSNPRYLLSYYSESS
KHQGSGVPGRFSGSKDASTNLGILHISGLQPEDEADYYCKIWHD
>V143RF-JABR01077601.1-iglv |(19390, 19700)|2.67102832614|(0.914,0.880,0.885)|-1
SWANFMLTQPHSVSGSVGQKVVISCTRSSGSIGSYYVQWYQQRPGSAPTTVIYDDNERPS
GVPDRFSGSIDSSSNSASLTISGLETEDEADYYCQSYDSSS
>V144RF-JABR01077601.1-iglv |(49244, 49551)|2.32226627951|(0.847,0.689,0.888)|-1
PVVQAGLTQPPSVSKGLRQTATLTCTGSSNNVGNQGAAWLQQHQGHPPKLLSYRNNNRPS
GISERFSASRSGNTASLTITGLQPEDEADYYCSAWDSSLS
>V145RF-JABR01077601.1-iglv |(59589, 59901)|2.81950720333|(0.967,0.907,0.960)|-1
SWAEVVFTQPHSVSGSPGQTVTISCTRSSGSIGSYYVQWYQQRPGSAPTTVIYNDNKRPS
GVPDRFSGSIDSSSNSASLTISGLKSEDEADYYCQSAADSYS
>V146RF-JABR01077601.1-iglv |(64069, 64379)|2.41502665519|(0.896,0.783,0.813)|-1
SVSQPVLTQSPSASASLGASVKLTCTLSSGHSSYTIAWHQQQPEKAPRYLMKLNSDGSHS
KGDGIPDRFSGSSSGAERYLTISNLQSEDEADYYCQTWEGG
>V147RF-JABR01077603.1-iglv |(14585, 14894)|2.72427536413|(0.889,0.920,0.924)|-1
VDSETEVTQEPSLSVSPGGTVTLTCGLSSGSVSTSNYPSWYQQTPGQAPRMIIYNTNTRP
SGVPDRFSGSILGNKAALTITGAEADDESDYYCVLYMGSGI
>V148RF-JABR01077916.1-ighv |(11011, 11320)|2.95330075255|(0.986,0.999,0.970)|-1
VQCEVQLVESGGDLVKPGGSLRLSCVASGFTFSSYAMHWVRQAPGKGLEWVSVISTSGGS
TYYADSVKGRFTISRDNAKNSLSLQMNSLRAEDTAVYYCAR
>V149RF-JABR01077916.1-ighv |(16007, 16319)|2.83360436451|(0.951,0.924,0.962)|-1
VLSQVQLQESGPGLVKPLETLSLTCAVSGYSISSGYYWSWIRQPPGKGLEWIGRIYGSSG
STDYNPSLKSRVTISKDTSKNQFSLKLSSVTAEDTAVYYCAR
>V150RF-JABR01077917.1-ighv |(3891, 4200)|2.89267205249|(0.967,0.958,0.968)|-1
VLSQVQLQQWGEGLVKPSETLSLTCAVSGGSISSYWWSWIRQPPGKGLEWIGEINGNSGS
TNYNPSLKSRVTISTDTSKNQFSLKLSSVTAADTAVYYCAR
>V151RF-JABR01077917.1-ighv |(15725, 16034)|2.72211044415|(0.964,0.919,0.877)|-1
VQCEVQLVESGGGLVQPGGFLRLSCAGSGFAFSSYGMDWVRQAPGKGLEWVAVISYDGSQ
KYYADSVKDRFTISRDNSKNMLYLQMNNLRAEDTAVYYCAK
>V152RF-JABR01078980.1-ighv |(7987, 8296)|2.92706338371|(0.989,0.984,0.958)|-1
AQSQEQLVQSGAEVKKPGASVKVSCKASGFTFDSYAISWVRQAPGQGLEWMGWIVPDYDI
TNYAQKFQGRVTITADTSTSTAYMELSSLRSEDTAVYYCAR
>V153RF-JABR01086102.1-ighv |(13684, 13993)|2.79941198255|(0.979,0.940,0.907)|-1
AQSQEQLVQSGAEVKKPGASVKVSCKASGYTFSSYAISWVRQAPGQGLEWMGVINPIVGI
TNYAQKFQGRVTITADTSTSTAYMELSSLRSEDTAVYYCAR
>V154RF-JABR01088213.1-trbv |(2386, 2682)|2.61956595086|(0.897,0.847,0.886)|-1
SVDAGVTQSPTHLIKMRGQQVTLRCSPISGHNSVSWYQQALGQGPQLIVQYYREQENGRG
NFPERFSGHQFPNYSSELNVSALLLVDSALYLCASSL
>V155RF-JABR01088213.1-trbv |(19991, 20282)|2.27646037901|(0.835,0.669,0.888)|-1
AAGVIQAPRHLIKVKRETATLQCYPIPEHDTVYWYQQGPGQGPQFLISFYEKMQRDKGSI
PDRFSAQQFSDYHSELNMRSLELEDSALYLCASSL
>V156RF-JABR01088213.1-trbv |(27616, 27913)|2.53023124233|(0.874,0.909,0.784)|-1
HMDAGITQSPRHKITETGTPVTLRCHQTENHRYMYWYRQDLGYGLRLIHYSYGVEDTDKV
EVSDGYSVSRSKTEDFLLTLESATHSQTSVYLCASSE
>V157RF-JABR01088213.1-trbv |(38991, 39291)|1.71017192219|(0.846,0.522,0.734)|-1
LTEAGVTQSPRYKITEKKQPVAFWCNPISGHNTLCWYRQNLGQGPELLIRYENKEAIDDS
QLPKDRFSAERLKGVDSTLRIQPAELGDSAVYLCASSL
>V158RF-JABR01088213.1-trbv |(44902, 45202)|2.1980889531|(0.813,0.742,0.707)|-1
HTDAGVIQSPRHEVTEMGKEVTLRCEPISGHNSLFWYRQTMMWGLELLIYFNNKAAIDDS
GMPKDRFSAEMPDASLATLKIQPSEPRDSAVYLCASGL
>V159RF-JABR01088214.1-trbv |(3884, 4203)|2.49060780721|(0.824,0.808,0.867)|-1
NAAVTQTPKFQVLKTGQSMTLQCAQDMNHECMSWYRQDPGMGLRLIHYSVAAGVTDKGEV
SNGYNVSRSNTEDFPLSLESAAPSQTSVHFCASSYSQRYKAVSS
>V160RF-JABR01088214.1-trbv |(9866, 10166)|2.77169983482|(0.947,0.906,0.927)|-1
HTCAGVSQSPRYKVTKRGQDVTLRCDPISGHEYLYWYQQVPGQGREFLTYFQNDAQLDKS
GLPSDRFSAERPEGSISILKIQRTEQGDSAVYLCASSL
>V161RF-JABR01088214.1-trbv |(18277, 18573)|2.33998188509|(0.934,0.718,0.873)|-1
PVDTGVTQSPTHLIKTRGQQVILRCSPISGHSSVSWYQQALGQGPQFIFEYYKEEERERG
NFPERFSGRQFPNYSSELNVNTLEMGDSALYLCASSL
>V162RF-JABR01088214.1-trbv |(26048, 26345)|2.34851440812|(0.920,0.961,0.680)|-1
PGNADVTQTPKFQVLKTGQSMTLQCAQDMNHNYMYWYRQDPGMGLRLIHYSVGAGITDKG
DVPNGYNVSRLNTEDFPLRLELAALSQTSVYFCASSD
>V163RF-JABR01088214.1-trbv |(38458, 38754)|2.37669115445|(0.914,0.835,0.752)|-1
SVDAGVTQSPTHLIKTRGEQVTLRCSPISGHSSVSWYQQALGQGPQFIFEYYEKAERGRG
NFPERFSGLQFPNYSSELNVNALLLGDSALYLCASSL
>V164RF-JABR01088214.1-trbv |(45860, 46151)|2.52139358233|(0.958,0.976,0.749)|-1
NAGVTQTPKFQVLKTGQSMTVQCTQDMNHNYMYWYRQDPGMGLRLIYYSVTAGITTKGEV
SNGYNVSRINTEDFLLRLESAAPSQTSVYFCASSY
>V165RF-JABR01088215.1-trbv |(4946, 5242)|2.45739725366|(0.930,0.794,0.838)|-1
PVQAGVTQSPTYLIKRRGQQVTLRCSPISGHTSVSWYQQALGQGPQFIFEYSNELRTSEG
NFPDRFSGRQFRNYHSEMNVSALELGDSALYLCASSF
>V166RF-JABR01088215.1-trbv |(7599, 7895)|2.3550721233|(0.879,0.728,0.841)|-1
SVDSGVTQTPKHLITAIGQQVTLRCSPRSGDLSVYWYQQSLGQGLQFLIQYYNGKERAKG
NILERFSAQQFPDLHSELNLSSLELGDSALYFCASSL
>V167RF-JABR01088215.1-trbv |(24838, 25129)|2.42416792298|(0.913,0.810,0.796)|-1
AGVAQSPRYKITEKSQAVAFWCDPISGHATLYWYRQILGQGPELLVRFQNEDVVDDSQLP
KDRFSAERLKGVNSTLRIQPAELGDSAVYLCASSL
>V168RF-JABR01088215.1-trbv |(38689, 38986)|1.86745556428|(0.881,0.535,0.839)|-1
HRDARITQSPRYKITETGRQVTLTCHQTWSHNNMFWYRQDLGHGLRLIYYSAGAGVTDKG
EVPDGYVVSRSKTEDFPLTVESATRSQTSVYFCASSE
>V169RF-JABR01088215.1-trbv |(46617, 46908)|2.30768624367|(0.900,0.867,0.697)|-1
AGVAQSPRYKVIEKSQAVTFWCNPVSGHATLYWYRQILGQGPELLVQFQNNDVVDDSQLP
KDRFSAERLKGVNSTLKIQPAKLGDSAVYLCASSL
>V170RF-JABR01088215.1-trbv |(53660, 53956)|1.63573922665|(0.593,0.662,0.464)|-1
AGIIQSPKHEVTEMGQAVTLRCEPILGHNLLFWYRQTFVQGLELLSYFWSRFIINDAGMP
MDRFSAERPDGSFSTRKIQPTEQGDSAVCVCASRLAI
>V171RF-JABR01088215.1-trbv |(64243, 64539)|2.84629713907|(0.967,0.980,0.912)|-1
PVNAGVTQTPKFQVLKTGQSMILQCAQDMNHDYMYWYRQDPGMGLRLIHYSVGAGITDKG
EVSNGYSVSRSNTEDFPLRLESAAPSQTSVYFCASSY
>V172RF-JABR01088215.1-trbv |(68443, 68744)|1.91144302148|(0.897,0.751,0.616)|-1
AGVSQSPRYRVTKRRQEVALRCDPISGHEYLYWYQQAPGQGPEFLIYFRNDAQLDKSGLL
SSRFSAERPKGSVSTLKIQHTEQGDAAVYLCASSLATE
>V173RF-JABR01088215.1-trbv |(76395, 76685)|2.00977249698|(0.892,0.855,0.584)|-1
DAGVTQSPTHLIKTRGQQVTLRCSPISGHTNVYWYQQTLDQGLQFILWYDEEEERDRGTF
PHRFLGLQFPNYSSELNVSALLLGDSALYLCASSL
>V174RF-JABR01088215.1-trbv |(87766, 88066)|2.10129401314|(0.923,0.769,0.692)|-1
HTGAGVLQSPRYRVTKRGQDVTLRCDPISGHEYLYWYQQAPGQGPEFLTYFWNDAQQDKS
GLPSGRFSAERPEGSVSTLKIQPTQQGDSAVYLCASSL
>V175RF-JABR01088215.1-trbv |(102278, 102574)|2.09543451998|(0.770,0.899,0.600)|-1
NAGVTQTSKFQVLKTGQNMTVQCAQDMNHNFMYWYRQDPGMGLRLIHYSGAAGTTDKGEV
PNGYNVSRLNTEVFPLRLESAAPSQTSVYICACGYST
>V176RF-JABR01088215.1-trbv |(106861, 107152)|2.69232889642|(0.904,0.866,0.931)|-1
AGVSQSPRYKVSKRGQEVALRCDPISGHAALYWYQQALGQGPELLTYFNYEAQQDKSGLL
SDRFSAERPEGSVSTLTIERTEQGDSAVYLCASSL
>V177RF-JABR01088215.1-trbv |(114804, 115100)|2.20418568229|(0.727,0.821,0.695)|-1
PVDTEVTQSPTHLIKTRGQQVTLRCSPISGHSSVYWHQQTLGQGPQLIFEYDRKEERGRG
NFPDRFSGRQFPNYSSELNVNASEMGDSALYLCASSL
>V178RF-JABR01088216.1-trbv |(3479, 3776)|2.78494983875|(0.950,0.900,0.945)|-1
PANAGVTQSPKFQILKTGQSMTLQCAQDMNHNSMYWYRQDPGMGLRLIHYSVAENTTDTG
EVPDGYSVSRLKKKDFLLRLESAAPSQTSVYFCASSE
>V179RF-JABR01088216.1-trbv |(16727, 17025)|2.28432728568|(0.920,0.785,0.754)|-1
VSQTLKYLVTQTGEKESLKCEQNLGHNAMYWYKQDSKKLLQIMFIYNNQEPILNETVPDR
FSPKSPDKAHLILHIKSVELGDSAVYFCASSQDTALQ
>V180RF-JABR01088216.1-trbv |(20140, 20437)|2.22894666286|(0.812,0.714,0.754)|-1
PMETGVMQTPRHLVMGMTNKKPLKCEQHLGHNAMYWYKQKAKKPLELMFVYNFKERAENN
SVPSRFVPECPDSSHLYLHVRALQPEDSALYFCASSQ
>V181RF-JABR01088216.1-trav |(30363, 30669)|1.74749293361|(0.602,0.524,0.823)|-1
QSMTLQCAQDMNHERMYWYRQDPGMGLRLIHYSVAENTTDKGEVPDGYSVSRLNKKDFLL
RLESAAPSQTSVYFCASSEATVLHGRLLSAHKGRRGSALI
>V182RF-JABR01088216.1-trbv |(32988, 33285)|2.88072634217|(0.981,0.976,0.933)|-1
PVNAGVTQTPKFQILKTGQSMTLQCAQDMNHNYMYWYRQDPGMGLRLIHYSVGKGSTDTG
EVPDGYSVSRSNLQNFMLRLESAAPSQTSVYFCASSE
>V183RF-JABR01088216.1-trbv |(36726, 37026)|1.98937259097|(0.920,0.853,0.589)|-1
HTGAGVSQSPRNKVTEEGKDVVLRCDPISGHTALYWYRQSLGKGLEFLIYFQGKDAPDKS
GLPSGRFSVERPEGSVSTLKIQPTQQGDSAVYLCASSL
>V184RF-JABR01092598.1-ighv |(8862, 9169)|2.69676332173|(0.953,0.894,0.883)|-1
AHSEVQLVQSGAEVRKPGATVKISCKASGYTFTGYYLHWVRQAPGKGLEWMGLVDPEDGE
ANYAQKFQGRVTMTADTSTDTAYMELSSLRSEDTAVYYCA
>V185RF-JABR01098590.1-trav |(5160, 5460)|2.49516077411|(0.921,0.847,0.803)|-1
FSMAQTVTQSQPEMSVQEAETVTLSCTYDTSDSDYYLFWYKQPPSRQMILIIRQEAYKQQ
NATENRFSVNFQKAAKSFSLKISDSQLGDAAGYFCAYR
>V186RF-JABR01098592.1-trdv |(18652, 18953)|2.23452035839|(0.720,0.736,0.815)|-1
SSMAQTVTQSQPEMSVQEAETVTLNCTYDTSESNYYLFWYKQPPSRQMILIIRQEAYKQQ
NAKENRFSVNFQKAAKSFSLKISDSQLGDAAMYFCAFM
>V187RF-JABR01098593.1-trav |(7825, 8114)|1.93156550943|(0.729,0.541,0.873)|-1
VRGDAKTTQPNSMESNEEEPVHLPCNHSTVSGTDYIYWYRQLPSQGPEYVIHGLTTNVNN
RMVSLTIAEDRKSSTLILHHATLRDAAVYYCILR
>V188RF-JABR01098593.1-trav |(12562, 12849)|2.09458273906|(0.685,0.682,0.908)|-1
VSSQELEQSPQSLIIQEGKNLTINCTSSKTLYSLHWYKQKYGEGLIFLMMLQKGGEEKSH
EKITAKLDEKKQQSFLHITASQPSHAGIYLCGGD
>V189RF-JABR01098593.1-trav |(29181, 29471)|2.25875665948|(0.724,0.751,0.884)|-1
VSSEDKVVQNPLSLVVHEGDTVTLNCSYEVINFRSLLWYKQEKKAPTFLFMLTSSGFDKK
KGRLSGILDKKELFSILNITATQTRDSAIYLCAVE
>V190RF-JABR01098595.1-trav |(1678, 1977)|2.19809010525|(0.845,0.795,0.676)|-1
VNGQQIMQIPQYQHVQEGEDFTTYCNSSTTLNNIQWYKQRPGGHPVFLIVLVKSGEVKKQ
KRLTFQFGEAKKNSSLHITATQTTDVGTYFCAGHSAPQ
>V191RF-JABR01098595.1-trav |(12709, 12999)|2.27126976553|(0.802,0.682,0.854)|-1
TIIDAKTTQPTSMDCAEGRGANLPCNHSTISGNEYIYWYRQIHSQGPQYVIHGLKNNETN
AMASLIITEDRKSSTLILPHATLRDTAVYYCIVRV
>V192RF-JABR01098595.1-trav |(53307, 53631)|1.98875878041|(0.671,0.770,0.604)|-1
VNSQQKNDDQQVKQNPPSLSVQEGGISILNCDYTNSMFDYFLWYKKYPAEGPTSLISISS
IKDKKEEGRFTVFLNKSAKHLSLHIGASQPGDSAMYLCAASAQCSP
>V193RF-JABR01098595.1-trav |(58455, 58742)|2.25424652779|(0.774,0.700,0.806)|-1
VRSQKPVQGPQAVILQEGEDAIINCNSSKALYSVHWYRQKHGEVPVFLMILLKGGEQKSH
DKIVATFNEKKHQSSLYLMASQLSYSGTYFCGAE
>V194RF-JABR01098596.1-trav |(10048, 10351)|1.98798816903|(0.695,0.605,0.723)|-1
IQVEQSPPDLILQEGANSTLRCNYSATVSNLQWFHQNPWGQLINLFYIPSGTKQNGRLSA
TTVTSERYSLLHISSSQTTDSGIYFCAVEPQYSPGTCSL
>V195RF-JABR01098596.1-trav |(31035, 31347)|1.94109359364|(0.837,0.614,0.722)|-1
VSGQQKEKSDRQQVKQSPQSLIVQKGEISIINCAYENSAFDYFPWYRQFPGKGPALLIAI
RSAMSEKEEGRFKIFFNKSAKNFSLHIMDSQPGDSATYFCAA
>V196RF-JABR01098596.1-trav |(39751, 40051)|2.06475865579|(0.755,0.633,0.736)|-1
FSVAQKVTQAQSSVSMPVGKAVTLNCQYETSSWSYHIFWYKQLPGKEMIFLIRQGSSEQN
AKNGRYSVNFEKAASSITLTISALQLEDSATYFCALWE
>V197RF-JABR01098597.1-trav |(9844, 10131)|2.06701844054|(0.831,0.656,0.733)|-1
LSGEDQVTQSPEALRLQEGQSSSLNCSYTASNLRGLLWYRQDPGKGPEFLFILYSAGEEK
EKERLKATLTKKESFLHITGPKPEDSATYLCAVQ
>V198RF-JABR01098597.1-trav |(21891, 22182)|2.15219144904|(0.811,0.612,0.947)|-1
VSSKQEVTQIPAALSVPEGDNLVLNCSFTDSAIYNLQWFRQDPGKGLTSLLLIQSSQREQ
TSGRLNASLDKSSRHSTLYITASEPGDSATYLCAV
>V199RF-JABR01098598.1-trav |(19033, 19320)|2.66586203088|(0.909,0.878,0.885)|-1
VNSQQGEEDPQALSIQEGENATMNCSYKTSIDNLQWYRQDSGRSLVRLILIRSNEREKSS
GRLRVTLDTSKKSSSLLITASRAADTASYFCATD
>V200RF-JABR01098598.1-trav |(25184, 25475)|2.54386940851|(0.822,0.960,0.836)|-1
RTNGDSVTQTEGPVTLPERAALTLNCTYQTSYSAFMFWYVQYLNKEPELLLKSSENQETD
SRGFQASHVKSDSSFHLEKLSVQLSDSAVYYCVLR
>V201RF-JABR01098598.1-trav |(28683, 28986)|2.27694670372|(0.833,0.752,0.747)|-1
SSMAQKVTQAQTEISVVEKEDVNLDCVYETRDSTYYLFWYKQPPSGELIFLIRQNSFNEQ
NEINGRYSSNFQKSTSSFNLTITASQVVDSAVYFCALNE
>V202RF-JABR01098599.1-trav |(7776, 8069)|2.75347510987|(0.919,0.898,0.940)|-1
VWSQQKEVEQNPGPLSVPEGATASLNCTYSNSAFQYFMWYKQYSRKGPQLLIYTYSSGDK
EDGRFTAQVDKSSKYISLFIRDSQPSDSATYFCAMS
>V203RF-JABR01098599.1-trav |(19604, 19904)|1.76333345665|(0.874,0.666,0.616)|-1
GTRAQSVTQLDRQVPVFEEAPVLLRCNYSSSSVSVYLFWYVQYPNQGLQLLLKYLSGPTL
VKGINGFEAEFKKSETSFHLRKPSAHISDTAEYFCAVS
>V204RF-JABR01098600.1-trav |(14202, 14490)|2.57218998163|(0.821,0.879,0.962)|-1
VWSQQKVEQNSGSLSVPEGAIASLNCTYSDRGSQSFLWYRQYSGQSPELLISTYSSGDKE
DGRFTAQLNKASQYVSLLIRDSQLSDSATYLCVV
>V205RF-JABR01098600.1-trav |(20988, 21285)|2.181850431|(0.946,0.747,0.762)|-1
GTRAQSVTQLDSQVSVSEGVPVLLRCNYSSSFSPSLFWYVQYPNQGLQLLLKYISGTALV
KGINGFEAEFKKSETTFHLTKASAHVSDAAEYFCAVS
>V206RF-JABR01098600.1-trav |(26541, 26838)|2.39516822136|(0.917,0.851,0.750)|-1
TARAQSVTQPDIHITVSEGASLELRCNYSYGATPSLFWYVQSPGQGLQLLLKYFSGDTLV
QGIKGFEAEFKRSQYSFNLRKPSVHWSDAAEYFCAAG
>V207RF-JABR01098600.1-trav |(40729, 41022)|2.42583565057|(0.927,0.772,0.845)|-1
VSRGESVGLHLPTVSVQEGDNSVINCTYSDSVSDYFLWYKQESGKGPQFIIDIRSNMAKR
QGQRLTVLLNKTVKHLSLQIAATEPGDSAVYFCAEN
>V208RF-JABR01098600.1-trav |(52617, 52918)|2.32849474925|(0.849,0.689,0.897)|-1
SGIAQKITQTQPAMFMQEKEAVTLDCTYDTSDQNYGLFWYKQPSSGEMIFLIHQESYDKQ
NATEGRYSLNFQKARKSINLIISASQVGDSAMYFCAMR
>V209RF-JABR01098600.1-trav |(72785, 73095)|2.46919212748|(0.944,0.800,0.844)|-1
SVTQMQGPVTLSERAFLTINCTYTATGYPSLFWYVQYPGEGPQLLLKAAKDDDKGSNKDF
EATYRKETTSFHLEKDSVQESDSAVYFCALSDTVTGTARGV
>V210RF-JABR01098601.1-trav |(15930, 16220)|2.7628984707|(0.937,0.898,0.934)|-1
VNGENVEQHPSILSVQEGDSSVIKCTYSDSASNYFPWYKQELGKGPQLIIDIRSNVHEKK
DQRITVLLNKTAKHFSLHITETQPGDSAVYFCAAS
>V211RF-JABR01098603.1-trav |(9193, 9499)|2.38524037236|(0.907,0.733,0.866)|-1
VWSQQKEVEQDPGPFSVPEGATVTFNCTYSNSASQSFFWYRQDSRKEPKLLMSVYSSGNE
DGRFTAQLNRASQYISLLIRDSQLSDSATYLCAVRTQCSP
>V212RF-JABR01098603.1-trav |(14624, 14921)|1.71811544147|(0.936,0.613,0.704)|-1
GTRAQSVTQLDSQVSVSEGVPVLLRCNYSSPVSPNLFWYVQYPNQGLQLLLKYTSGTTLV
KGINGFKAEFKKSETSFHLTKASAHVSDAAEYFCAVS
>V213RF-JABR01098604.1-trav |(11404, 11694)|2.68003455457|(0.883,0.864,0.955)|-1
MSRGEDVEQSLFLSVREGDISVINCTYTDSSSTYLYWYKQEPGAGLQLLTYILSNTDLKQ
DQRLTVLLNKKDKHLSLRIADTQTGDSAIYFCAES
>V214RF-JABR01098604.1-trav |(25125, 25413)|2.06956802496|(0.843,0.771,0.635)|-1
VKNQKIEQNSEALNIQEGKTATLTCNYTNYSPSYLQWYRQDPGRGPVFLLLIRENEKEKW
KERLKVTFDTTLKQSLFHITASQPADSATYLCAL
>V215RF-JABR01098604.1-trav |(37115, 37402)|2.52221930123|(0.822,0.833,0.882)|-1
ANGENQVEQSPRFLGPQQGDVAFMSCMYSVSRFNNLQWYRQNTGTGPKHLFSMYSAGYEK
QKGRLNATLLKNGSSLYITAMQPEDSATYFCAVD
>V216RF-JABR01098604.1-trav |(64438, 64732)|2.86574067733|(0.958,0.979,0.933)|-1
EINGDSVVQTEGQVLLSEGDSLIVNCSYESTQYPSLFWYVQYPGEGPQLLLKAMMANDKE
SNKGFEATYHKETTSFHLKKDSVQESDSAVYFCALS
>V217RF-JABR01098604.1-trav |(77658, 77951)|2.40119386655|(0.762,0.832,0.891)|-1
GSGKNQVEQSPQSLIILEGKNCTLQCNYTVSPFNNLRWYKQDTGKGPISLTIMTFSENTK
LNGRYTATLDADTKQSSLHITATQLSDSASYICVVS
>V218RF-JABR01098606.1-trav |(22478, 22773)|2.23459177554|(0.872,0.687,0.816)|-1
DQVTVAEGNPLTVKCTYSVSGNPYLFWYVQYPKQGLQFLLKYITGDNLVKGSYGFEAEFN
KSQTSFHLKKPSALVSDSALYFCAVRDTLIGAAGGA
>V219RF-JABR01098609.1-trav |(14815, 15124)|2.24194142466|(0.855,0.886,0.654)|-1
TIMYLVIGTAGQSLEQPSEVTAVEGAIVQINCSYQTSRFDGLSWYQQHDGGAPTFLSYNA
LDGLEERGHFSSFLSRSDSYGYLLLQELQMKDSASYFCAVR
>V220RF-JABR01098609.1-trav |(38844, 39147)|2.17316198126|(0.742,0.664,0.809)|-1
KCLVLGTTGQNIDQPTEMTAMAGAIVQINCTYQTSGFNGLSWYQQHDGEAPTLLFYNVLD
GLEEKGRFSSFLSNSKGYSYLLLKELQMKDSASYLCAVR
>V221RF-JABR01184607.1-trbv |(64, 364)|2.64255044765|(0.902,0.915,0.841)|-1
HTGAGVSQSPRNKVTEKGKDVALRCDPISGHTVLYWYRQNLGQGLEFLIYFRGTGAVDDS
GLRSDQFSATRPEGSDSTLKIQCTEQRDSAMYFCASSL
>V222RF-JABR01190886.1-ighv |(459, 765)|2.86740093364|(0.961,0.982,0.930)|-1
CAEVQLVQSGAEVKRPGESLKISCKTSGYSFTSYWISWVRQMPGKGLEWMGMIYLGDSDT
RYSPSFQGQVTISADKSISTTYLQWSSLKASDTATYYCAK
>V0RF-CABD02043817.1-igkv |(3028, 3328)|2.96468883957|(0.982,0.984,1.000)|1
ARCDIQMTQSPSSLSASVGDRVTITCQASQGISNNLNWYQQKPEKTPKLLIYAASSLQSG
IPSRFSDSGSGTDYTLTISSLQPEDFATYYCQQSDSTP
>V1RF-CABD02105556.1-trav |(1379, 1688)|2.37825837894|(0.886,0.940,0.697)|1
TIMYLVIGTAGQSLEQPSEVTAVEGATVQINCTYQTSGFYGLSWYQQHDGGAPTFLSYNA
LDGLEETGHFSSFLSRSDSYGYLLLQELQMRDSASYFCAVR
>V2RF-CABD02105568.1-trav |(17605, 17902)|2.31409717281|(0.926,0.664,0.973)|1
GLRAQSVAQPEDQVTVAEGNPLTVKCTYSVSGNPYLFWYVQYPNKGLKFLLKYITGDNLV
KGSYGFEAEFNKSQTSFHLKKPSALVSDSALYFCAVR
>V3RF-CABD02105570.1-trav |(17984, 18274)|2.72593938112|(0.909,0.953,0.876)|1
MSRGEDVEQSLFLSVQEGDSSIIKCTYTDSSSTYLYWYKQEPGAGLQLLMYIFSNMDMKQ
DQRLTVLLNKKDKHLSLRIADTQTGDSAIYFCAES
>V4RF-CABD02105575.1-trav |(937, 1225)|2.05588561295|(0.677,0.698,0.965)|1
VKSQKIEQNSEALNIQEGKTATLTCNYTNYSPAYLQWCRQDPGRGPVFLLLIRENEKEKR
KERLKVTFDTTLKQSLFHITASQPADSATYLCAL
>V5RF-CABD02105579.1-trav |(4709, 5003)|2.88492674205|(0.976,0.991,0.928)|1
GINGDSVVQTEGQVLLSEGDSLIVNCSYETTQYPSLFWYVQYPGEGPQLLLKAMKANDKG
RNKGFEATYHKETTSFHLEKDSVQESDSAVYFCALS
>V6RF-CABD02105581.1-trav |(5845, 6138)|2.43290087818|(0.824,0.745,0.965)|1
GSGKNQVEQSPQSLIILEGKNCTLRCNYTVSPFNNLRWYKQDTGRGPVSLTIMTFSENTK
SNGRYTATLDADTKQSSLHITASQLSDSASYICVVS
>V7RF-CABD02105584.1-trav |(2822, 3110)|2.74223004247|(0.907,0.882,0.973)|1
VWSQRKEVEQDPGPFNVPEGATVAFNCTYSNSASQSFFWYRQDCRKEPKLLMSVYSSGNE
DGRFTAQLNRASQYISLLIRDSQLSDSATYLCAV
>V8RF-CABD02105586.1-trav |(1660, 1957)|2.58933395491|(0.912,0.881,0.828)|1
GTRAQSVTQLDSHVSVSEGTPVLLRCNYSSSYSPSLFWYVQHPNKGLQLLLKYTSRATLV
KGINGFEAEFKKSETSFHLTKPSAHMSDAAEYFCAVS
>V9RF-CABD02105588.1-trav |(5783, 6073)|2.23106033169|(0.958,0.975,0.637)|1
VNGENVEQHPSTLSVQEGDSAVIKCTYSDSASNYFPWYKQELGKGPQLLIDIRSNVGEKK
DQGITVTLNKTAKHFSLHITETQPEDSAVYFCAAS
>V10RF-CABD02105588.1-trav |(25116, 25407)|2.74053496597|(0.928,0.891,0.927)|1
VWSQQKEVEQNSGPLSVPEGAIASLNCTYSDRRSQSFFWYRQYSGKSPELIMSIYSNGDK
EDGRFTAQLNKASQYVSLLIRDSQPSDSATYLCAV
>V11RF-CABD02105589.1-trav |(20536, 20829)|2.61400925646|(0.929,0.837,0.888)|1
VSRGESEGLHLPTLSVQEGDNSIINCAYSNSASDYFIWYKQESGKGPQFIIDIRSNMDKR
QGQRVTVLLNKTVKHLSLQIAATQPGDSAVYFCAEN
>V12RF-CABD02105589.1-trav |(26461, 26764)|2.55131450683|(0.886,0.777,0.952)|1
PGIAQKITQTQPGMFMQEKEAVTLDCTYDTSDQSYGLFWYKQPSSGEMIFLIYQGSYDQQ
NATEGRYSLNFQKARKSANLVISASQLGDSATYFCAMRE
>V13RF-CABD02105590.1-trav |(3574, 3868)|2.81982541375|(0.930,0.929,0.966)|1
RTRGDSVTQMEGPVTLSEEAFLTINCTYTATGYPSLFWYVQYPGEGLQLLLKATKADDKG
SNKGFEATYHKETTSFHLEKDSVQASDSAVYFCALS
>V14RF-CABD02105592.1-trav |(17384, 17677)|2.77796483513|(0.942,0.900,0.943)|1
VWSQQKEVEQDPGPLSVPEGAIASLNCTYSNSAFQYFMWYRQYSRKGPELLMYTYSSGNK
EDGRFTVQVDKSSKYISLFIRDSQPSDSATYLCAMS
>V15RF-CABD02105596.1-trav |(11716, 12003)|2.81964192834|(0.923,0.961,0.943)|1
VNSQQGEEDPQALSIQEGENATMNCSYKTSINNLQWYRQNSGRGLVHLILIRSNEREKHS
GRLRVTLDTSKKSSSLLITASRAADTASYFCATD
>V16RF-CABD02105598.1-trdv |(2122, 2425)|2.18849109485|(0.782,0.718,0.720)|1
SSMAQKVTQTQNEISVVEKEDVTLDCVYETRDTTYYLFWYKQPPSGELVFLVRQNSFDEQ
NEISGRYSWNFQKSTSSFNFTITASQVVDSAVYFCALSE
>V17RF-CABD02105602.1-trav |(5884, 6171)|2.56130846924|(0.923,0.872,0.819)|1
LSGEDQVTQSPEALRLQEGESSSLNCSYTVSGLRGLFWYRQDPGKGPEFLFTLYSAGEEK
EKERLKATLTKKESFLHITAPKPEDSATYLCAVQ
>V18RF-CABD02105602.1-trav |(17805, 18104)|2.38864393773|(0.854,0.713,0.911)|1
VSSKQEVTQIPAALSVPEGENLVLNCSFTDSAIYSLQWFRQDPGKGLTSLLLIQSSQREQ
TSGRLNASLDKSSGHSTLYIAASQPGDSATYLCAVRHS
>V19RF-CABD02105605.1-trav |(10343, 10640)|2.28453988784|(0.833,0.730,0.776)|1
VRGIQVEQSPPDLILQEGANSTLRCNFSDSVNNLQWFHQNPWGQLINLFYIPSGTKQNGR
LSATTVATERYSLLYISSSQTTDSGVYFCAVEPQCSP
>V20RF-CABD02105611.1-trdv |(4032, 4332)|2.36261831412|(0.796,0.726,0.916)|1
SSVAQKVTQAQSSVSTSVRKAVTLNCLYETSQWSYYIFWYKQLPSKEMIFLIRQGSAEQN
AKSGRYSVNFKKAAKSVALTISALQLEDSAKYFCALWE
>V21RF-CABD02105612.1-trav |(1576, 1866)|2.25671156848|(0.893,0.664,0.889)|1
VNSILNVEQSPQSLHVQEGDSTNFTCSFPSSNFYALHWYRWETAKSPEALFVMTLNGDEK
KKGRISATLNTKEGYSYLYIKGSQPEDSATYLCAF
>V22RF-CABD02105614.1-trav |(2102, 2401)|2.11191386391|(0.867,0.848,0.618)|1
VNGQQVMQIPQYQHVQEGEDFTTYCNSSTTLSNIQWYKQRPGGHPVFLIQLVKNGEVKKQ
KRLTFQFGEAKKNSSLHITATQTTDVGTYFCAGHSAPQ
>V23RF-CABD02105615.1-trav |(7807, 8097)|2.59962749853|(0.845,0.865,0.906)|1
TIIDAKTTQPTSMDCAEGRAANLPCNHSTISGNEYVYWYRQIHSQGPQYIIHGLKNNETN
EMASLIITEDRKSSTLILPHATLRDTAVYYCIVRV
>V24RF-CABD02105616.1-trav |(2982, 3279)|1.55934579218|(0.756,0.538,0.569)|1
GTRAQSVTQLDGHITVSEEAPLELKCNYSYSGVPSLFWYVQYSSQSLQLLLKDLTEATQV
KGIKGFEAEFKKSETSFYLRKPSTHVSDAAEYFCAVG
>V25RF-CABD02105616.1-trav |(38647, 38934)|2.21321807762|(0.836,0.659,0.836)|1
VRSQQPVQTPQAMILREGEDAVINCSSSKALYSVHWYRQKHGEAPVFLMILLKGGEQKGH
DKISASFNEKKQQSSLYLMASQLSYSGTYFCGAE
>V26RF-CABD02105619.1-trav |(6063, 6349)|1.97847091725|(0.758,0.553,0.880)|1
IMGDAKTTQPNSMESYEEEPVHLPCNHSTISGTDYIHWYRQLPSQGPEYVIHGLTSNVNR
MASLTIAEDRKSSTLILHRATLRDAAVYYCILR
>V27RF-CABD02105623.1-trav |(10762, 11052)|1.69953801775|(0.555,0.745,0.882)|1
VSSEDKVVQSPLSLVVHEGDTVTLNCSYEVTNFRSLLWNKQEKKAPTFLFMLTSSGIEKK
SGRLSSILDKKELFSILNITATQTRDSAIYLCAVE
>V28RF-CABD02105626.1-trdv |(13262, 13563)|2.25251751797|(0.726,0.744,0.815)|1
SGTAQTVTQSQPEMSVQEAETVTLSCTYDTSESNYYLFWYKQPPSRQMILVIRQEAYKQQ
NATENRFSVNFQKAAKSFSLKISDSQLGDTAMYFCAFM
>V29RF-CABD02105626.1-trav |(22480, 22780)|2.7190132749|(0.953,0.954,0.852)|1
FSMAQTVTQSQPEMSVQEAETVTLSCTYDTSESDYYLFWYKQPPSRQMILVIRQEAYKQQ
NATENRFSVNFQKAAKSFSLKISDSQLGDAAMYFCAYR
>V30RF-CABD02105628.1-trav |(15554, 15842)|2.45324468725|(0.807,0.778,0.936)|1
LSGELKVGQNPLFLSTQEGKNYTIYCNYSTTSDRLYWYKQDPGKSLESLFVLLSNGAVKQ
EGRLMASLDTKARLSSLHITAAVHDLSATYFCAV
>V31RF-CABD02105628.1-trav |(26467, 26757)|1.99602408541|(0.690,0.633,0.686)|1
GTSSNSVKQMGQITVSEGASVTMNGTYTSTGYPTLFWYVQYPSKPLQLLQRETMENSKNF
GGGNIKDKNSPIVKYSVQVSDSAMYYCLLGDTVLK
>V32RF-CABD02105628.1-trav |(32227, 32513)|2.02953117661|(0.690,0.642,0.708)|1
VSAAKNEVEQSPQDLTAQEGEFITINCSYSVGISVLHWLQQYPGGGIVSLFMLSSGKKKH
GRLIATINIQEKHSSLHITASHPRDSAIYICAV
>V33RF-CABD02136297.1-ighv |(2232, 2554)|2.65878602735|(0.928,0.814,0.977)|1
VLSQVTLKESGPVLVKPTEILTLTCTLSGFSLSTSGMGMSWIRQPPGKALEWLAHIFSND
KKSYSTSLKNRLIISKGTSKSQVVLTMTNMDPVDTATYYCAWRAQ
>V34RF-CABD02136313.1-ighv |(4960, 5261)|2.17829693661|(0.700,0.969,0.871)|1
VQCEVQLVESGGGLVQPGGSLRLSCAASGFTFSNIWMSWVRQALGKGLEWVGCIKSKANG
GTTDYTAPVKGRFTISRDDSKNTLYLQMNSLKTEDTAV
>V35RF-CABD02136332.1-ighv |(9347, 9656)|2.947794597|(0.997,0.976,0.978)|1
AHSQVQLVQSGAEVKKPGASVKVSCKASGYTFTSYYMHWVRQAPGQGLEWMGIINPSGGS
TSYAQKFQGRVTMTRDTSTSTVYMELSSLRSEDTAVYYCAR
>V36RF-CABD02136430.1-ighv |(38815, 39121)|2.7940613815|(0.914,0.911,0.995)|1
VQCEVHLVQSGGGLVQPGGSLRLSCAGSGFTFSSHAMHWVRQAPGKGLEWVSAIGTGGGT
YYADSVKGRFTISRDNAKNSLYLQMNSLRAEDMAVYYCAR
>V37RF-CABD02196505.1-igkv |(9143, 9461)|2.37737524168|(0.977,0.691,0.989)|1
AYGDIVMTQSPESLAVSLGERVTINCKSSQSVLYSSNNKNYLAWYQQKPGQAPKLLIYWA
STRQSGVPDRFSGSGSGTDFTLTISSLQAEDVAVYYCQQYYSTP
>V38RF-CABD02196508.1-igkv |(2277, 2565)|2.52410694486|(0.852,0.792,0.906)|1
TTLTQSPAFVSATPGDKVTISCKASQDIDDDMNWYQQKPGEAAIFIIQEATTLVSGIPPR
FSGSGYGTDFTLTINNIESEDAAYYFCLQDDNFP
>V39RF-CABD02196554.1-igkv |(8457, 8757)|2.84518969173|(0.989,0.910,0.972)|1
ARCDIQLTQSPTSLSASVGDRVTITCQASQGISNNLAWYQQKPGKVPKLLIYSASSLQSG
VPSRFSGSGSGTDFTRTISSLQPEDVATYYCQRTYNAP
>V40RF-CABD02196563.1-igkv |(2290, 2590)|2.97120155558|(0.997,0.976,1.000)|1
ARCDIQMTQSPSSLSASVGDRVTITCRASQGISSWLAWYQQKPGKAPKLLIYAASSLESG
VPSRFSGSGSGTDFTLTISSLQPEDFATYYCQQANSFP
>V41RF-CABD02196568.1-igkv |(5046, 5361)|2.40442240178|(0.974,0.825,0.802)|1
SSADIVMTQTPLSLPVTPGQPASISCKSSQSLLHSDGKTYLYWYLQKPGQSPQLLIYEVS
NRASGVPDRFSGSGSGTDFTLKISRVEAEDVRVYYCMQGIQLP
>V42RF-CABD02196577.1-igkv |(8821, 9136)|2.60564190699|(0.964,0.789,0.968)|1
SSGDIVMTQTPLSLPVNPGQLASISCRSSQSLLHSNGYTYLHWYLQKPGKSPQLLIYRVS
SHFSGVPDRFSGSGSGSDFTLKISWVEAEDVGVYYCMQATQFP
>V43RF-CABD02196578.1-igkv |(13447, 13733)|2.64437673892|(0.934,0.867,0.875)|1
FLSVTPGEKVTITCQASEGIGNYLYWYQQKPDQAPKLLIKYASQSISGVPSRFSGSGSGT
DSGSGSGTDFTFAISSLEAEDAATYYCQQGNKH
>V44RF-CABD02196586.1-igkv |(1073, 1373)|2.98020030738|(0.999,0.985,0.997)|1
ARCDIQMTQSPSSVSASVGDRVTITCRASQGISNSLNWYQQKPGKAPRLLIYDASSLESG
VPSRFSGSGSGTDFTLTISSLQPEDFATYYCQQFNSYP
>V45RF-CABD02196587.1-igkv |(1282, 1582)|2.9813881665|(0.999,0.987,0.996)|1
ARCAIQMTQSPSSLSASVGDRVTITCRASQGISSYLAWYQQKPGKAPKLLIYYASSLQSG
VPSRFSGSGSGTDYTLTISSLQPEDFATYYCQQHSSTP
>V46RF-CABD02196588.1-igkv |(1835, 2135)|2.85679932146|(0.999,0.949,0.935)|1
TTGEIVMTQSPATLSVSPGERATLSCRASQSVSSYLAWYQQKPGQAPRLLIYGASNRATG
IPARFSGSGSGTDFTLTISSLEPEDFAVYYCQQYNNWS
>V47RF-CABD02196592.1-igkv |(6343, 6643)|1.7731637775|(0.849,0.615,0.651)|1
VRFDIQMTQSPSFLSASVGDRVSITCRASEGISSDLAWYLQKPGKSPKLFLYDAKDLRPG
VSSRFSGRGSGTDFTLTIISLKPEDFATYYCKQDFSYP
>V48RF-CABD02196595.1-igkv |(5365, 5665)|2.85731605249|(0.995,0.922,0.965)|1
ARCAIRMTQSPSSLSASTGDRVTITCRASQGISSYLAWYQQKPGKAPKLLIYAASTLQSG
VPSRFSGSGSGTEFTLTISCLQSEDFATYYCQQYYSYP
>V49RF-CABD02199693.1-igkv |(2056, 2356)|2.95832013632|(0.985,0.978,0.996)|1
ARCDIQVTQSPSSLSASVGDRVTITCRASQGISNELSWYQQKPGQAPTLLIYAASSLQSG
VPSRFSGSGSGTDFTLTISSLQPEDIATYYCLQDYTTP
>V50RF-CABD02231299.1-iglv |(4157, 4463)|2.7291471352|(0.886,0.959,0.907)|1
DSQTVVTQEPSFSVSPGGTVTLTCGLSSGSVSTSYYPSWYQQTPGQAPRMLIYSTNTRSS
GVPDRFFGSIIGNKAALTITGAQADDESDYYCVLYMGSGI
>V51RF-CABD02231313.1-iglv |(1017, 1323)|2.36843131148|(0.842,0.760,0.800)|1
SLSQPVLTQSSSASASLGSSVKLTCTLSSGHSSYIIAWQQQQPGKAPRYLMRLEGSGSYN
KGNGIPDRFSGSSSGADRYLTISNLQSEDEADYYCQTWDS
>V52RF-CABD02231318.1-iglv |(3555, 3862)|2.78604258827|(0.942,0.901,0.950)|1
SWANFMLTQPHSVSESPGQTVTISCTRSSGSIASNYVQWYQQRPGSAPTTVIYEDNQRPS
GVPDRFSGSIDSSSNSASLTISGLKTEDEADYYCQSYDSS
>V53RF-CABD02231322.1-iglv |(5586, 5875)|2.00052013771|(0.726,0.609,0.719)|1
LTQPPSVSKGLRQTATLTCTGNSNNVGNQGAAWLQQHQGHPPKLLSYRNNNRPSGISERF
SASRSGNTASLTIIGLQPEDEPDYYCSAWDSSLS
>V54RF-CABD02231359.1-iglv |(5556, 5865)|2.83693047006|(0.961,0.960,0.922)|1
SWAQSVLTQPPSVSAAPGQKVTISCSGSSSNIGNNYVSWYQQLPGTAPKILIYDNNKRPS
GISDRFSGSKSGTSATLGITGLQTGDEADYYCGTWDSSLSA
>V55RF-CABD02231360.1-iglv |(15331, 15617)|1.81062729924|(0.627,0.792,0.531)|1
SLSQPVLTQPPSASASLGASVTLTCPLSSGYSNYKVDWYQQRPGKGPRFVMRVGTSGIVG
SKGDGIPDRFSVLGSGLNRYLTIKNIQEEDESD
>V56RF-CABD02231360.1-iglv |(25045, 25355)|2.57161005589|(0.979,0.788,0.945)|1
SLSQPVLTQPTSLSASPGASARLTCTLRSGINLGTYRIYWYQQKPGSPPRYLLNYYSDSD
KHQGSGVPSRFSGSKDASTNAGILVISGLQSEDEADYYCMI
>V57RF-CABD02231362.1-iglv |(1583, 1892)|2.87010611876|(0.945,0.965,0.963)|1
SWAQSVLTQPPSASGTPGQRVTISCSGSSSNIGSNTVNWYQQLPGTAPKLLIYDNNKRPS
GVPDRFSGSKSGTSASLAISGLRSEDEADYYCAAWDDSLNG
>V58RF-CABD02231364.1-iglv |(7497, 7804)|1.89770504852|(0.890,0.933,0.514)|1
SNSQAVVTQEPSLTVSPGGTVTLTCGSSTGAVTSGHYPYWFQQKPGQAPRTLIYDTSNKH
SWTPARFSGSLLGGKAALTLSGAQPEDEAEYYCWLHYSGA
>V59RF-CABD02231364.1-iglv |(18770, 19079)|2.84472989931|(0.951,0.922,0.978)|1
SWAQSVLTQPPSASGTPGQRITISCSGSSSNIGSNTVNWYQQLPGTAPKLLIYDNNKRPS
GVPDRFSGSKSGTSASLAISGLQSEDEADYYCAAWDDSLNG
>V60RF-CABD02231389.1-iglv |(9106, 9409)|1.85539857711|(0.739,0.678,0.566)|1
SWAQSALTQPPFVSRAPGQSVTISCTGTSSDVGDYDHVFWYQKRLSTTSRLLIYNINTRP
SGISDLFSGSKSGNVASLTISGLKSEVEANYHCSLYSSS
>V61RF-CABD02231410.1-iglv |(1308, 1605)|2.93430455465|(0.993,0.966,0.979)|1
SVASYELTQPSSVSVSPGQTARITCSGDVLAKNYAGWYQQKPGQAPVLVIYKDSERPSGI
PERFSGSSSGTTVTLTISGAQVEDEADYYCYSAADNN
>V62RF-CABD02231415.1-iglv |(2745, 3048)|2.64640065147|(0.981,0.805,0.977)|1
SEASYELTQPPSVSVSLGQTARITCSGEELPKKYAYWYQQKPGQSPVLVIYKDSERPSGI
PERFSGSSSGTTVTLTISGVQAEDEADYYCLSADSSDTY
>V63RF-CABD02231416.1-iglv |(6612, 6901)|1.77852844426|(0.824,0.533,0.738)|1
SVSPGQTARITCSGDVLGENYADWYQQKPGQAPELVTYEDSERPPGIPERFSGSTSGNMT
TLTISRVLTEDEADYYCLSRDEDNPTVTQADGEV
>V64RF-CABD02231416.1-iglv |(14948, 15251)|2.25182209144|(0.918,0.886,0.670)|1
SVTSYELTQPPSVSVAPGQAARITCGGNNIGSKSVHWYQQKPGQAPVLVIYYDSDWPSGI
PERFSGSNSGNTATLTISRVEAGDEADCYCQVWDSSSKH
>V65RF-CABD02231416.1-iglv |(22863, 23166)|2.49658751332|(0.961,0.741,0.971)|1
SVVSSELTQDPAVSVALGQTVRITCQGDSLRSYYASWYQQKPGQVPVLIIYGKNNRPSGI
PDRFSGSSSGNTASLTITGAQEEDEADYYCNSWDSSGNH
>V66RF-CABD02231419.1-iglv |(2003, 2306)|2.79506971828|(0.979,0.944,0.901)|1
SWAQSALTQPPSVSGSPGQSVTISCTGTSSDIGGYNRASWYQQHPGKAPKLMIYEVSKRP
SGVSNRFSGSKSGNTASLTISGLQAEDEADYYCSSYTSS
>V67RF-CABD02231421.1-iglv |(1448, 1751)|2.85193423061|(0.986,0.976,0.912)|1
SWAQSALTQPASVSGSPGQSITISCTGTSSDVGGYNYVSWYQQHPGKAPKLMIYYVSNRP
SGVSNRFSGSKSGNTASLTISGLQAEDEADYYCSSYTSS
>V68RF-CABD02231422.1-iglv |(7425, 7728)|2.77638394575|(0.985,0.886,0.949)|1
SATSYELTQPHSVSVATAQTARITCGGNNIGSKAVHWYQQKPGQDPVLVIYSDSNRPSGI
PERFSGSNSGNTATLTISRIEAGDEADYYCQVWDSSSDH
>V69RF-CABD02231427.1-iglv |(14063, 14366)|2.88552036441|(0.994,0.936,0.971)|1
SEASYELTQSPSVSVSPGQTARITCSGDALPKKYAYWYQQKPGQAPVLVIYEDSKQPSGI
PERFSGSSSGTMATLTISGAQVEDEADYYCYSTDSSGNH
>V70RF-CABD02231427.1-iglv |(25067, 25377)|2.60944634762|(0.841,0.913,0.883)|1
SWAQSALIQPPSASGSPGQSVTISCTGTSSDIGGYNYVSWYQRHPGKAPKLMIYEVSNRP
SGVPNRFSGSKSGNTASLTISGLQAEDEADYYCCSYAGSNN
>V71RF-CABD02231431.1-iglv |(3583, 3874)|2.91252788906|(0.990,0.967,0.961)|1
SVASYELTQPPSVSVSPGQTASITCSGDKLGDEYAYWYQQKPGQSPVLVIYQDSKRPSGI
PERFSGSNSGNTATLTISGTQAMDEADYYCQAWDS
>V72RF-CABD02352478.1-trbv |(1118, 1418)|2.3795444754|(0.932,0.913,0.712)|1
LTEPEVTQTPSHQVTQMGQEVILRCVPISNHLYFYWYRQILGQKVEFLVSFYNNKISEKA
EIFDDQFSVERPDGSNFTLKIRSTKLEDSAMYFCASSE
>V73RF-CABD02352480.1-trbv |(136, 449)|2.55557726394|(0.901,0.942,0.778)|1
PIDTEVTQTPKHLVMGMTNKKSLKCEQHMGHRAMYWYKQKAKKPPELMFVYSYEKLSVNE
SVPSRFSPECPNNSLLNLHLHALQPEDSALYLCASSQDTALQ
>V74RF-CABD02352480.1-trbv |(7988, 8284)|2.30161449652|(0.908,0.787,0.754)|1
PVEAGVTQTPRYLIKTRGQQVTLSCSPISGHRSVSWYQQTLGQGLQFLFEYFGETQRNKG
NFPGRFSGRQFSNSRSEMNVSTLELGDSALYLCASSL
>V75RF-CABD02352482.1-trbv |(248, 545)|2.81776208464|(0.908,0.976,0.965)|1
PVNAGVAQTPKFQVLKTGQSMTLQCAQDMNHNSMYWYRQDPGMGLRLIYYSAAEGTTAKG
EVPDGYNVSRLNKREFSLRLESAAPSQTSVYFCASSE
>V76RF-CABD02352488.1-trbv |(3197, 3494)|2.75616889119|(0.966,0.917,0.900)|1
PVNAGVTQTPKFHVLKTGQSMTLLCAQDMNHEYMYWYRQDPGMGLRLIHYSVGEGTTAKG
EVPDGYNVSRLKKQNFLLGLESAAPSQTSVYFCASSY
>V77RF-CABD02352491.1-trbv |(2383, 2680)|2.6397050841|(0.916,0.945,0.819)|1
PLDTAVSQTPKYLVTQMGKKESLKCEQNLGHNAMYWYKQDSKKFLKTMFIYSNKEPILNE
TVPNRFSPDSPDKAHLNLHINSLELGDSAVYFCASSQ
>V78RF-CABD02352492.1-trbv |(775, 1088)|2.48760962185|(0.956,0.896,0.774)|1
PMEMGVTQTPRHLVMGMTNKKSLKCEQHLGHNAMYWYKQSAKKPLELMFVYSLEERVENN
SVPSRFSPECPNSSHLFLHLHALQPEDSALYLCASSQDTALQ
>V79RF-CABD02352493.1-trbv |(4882, 5179)|2.65569097572|(0.884,0.974,0.838)|1
PVDAGVTQTPKFQVLKTGQSMTLQCAQDMNHNYMYWYRQDPGKGLRLIHYSAGEGTTAKG
EVPDGYNVSRLNTQNFLLRLELAARSQTSVYFCATSE
>V80RF-CABD02352494.1-trbv |(447, 747)|2.54436655351|(0.894,0.865,0.814)|1
HTRAGVSQSPSNKVTEKGKDVVFRCDPISGHSVLYWYQQSLGQGLEFLIYFQGNSAPDKS
GLPSDRFSAERTGGSVSTLTIQRTQQEDSAMYLCASSL
>V81RF-CABD02352498.1-trbv |(5308, 5605)|2.14908099187|(0.882,0.702,0.752)|1
PMIAGITQAPTSQILAAGRSMTLRCTQDMRHNAMYWYRQDLGLGLRLIHYSNTAGTTGKG
EVPDGYSVSRANTDDFPLMLASAVPSQTSVYFCASSD
>V82RF-CABD02352499.1-trbv |(1151, 1451)|2.53982533948|(0.960,0.963,0.762)|1
HTGAGVSQTPSNKVTEKGKDVELRCDPISGHTALYWYRQSLGQGPEFLIYFQGTGATDDS
GLPNDRFFAVRPEGSVSTLKIQRTEQGDSAVYLCASSL
>V83RF-CABD02352499.1-trbv |(5984, 6280)|2.20275792443|(0.848,0.721,0.741)|1
PVEAGATQSPTHLLKTRGQQVTLRCSPISGHSSVSWYQKAPGQGPQFIFEYANELRRLEG
NFPNRFSGRQFHDYRSEMNVSALELGDSALYLCARSL
>V84RF-CABD02352499.1-trbv |(8716, 9012)|2.697156596|(0.904,0.871,0.929)|1
PVDSGVTQTPKHLITATGQRVTLRCSPRSGDLSVYWYQQSLDQGLQFLIQYYNGEERAKG
NILERFSAQQFPDSHSELNLSSLELGDSALYLCASSV
>V85RF-CABD02352499.1-trbv |(16726, 17023)|2.00358677339|(0.847,0.548,0.954)|1
HRDAEITQSPRHKITETGRQVTLACYQTWNHNNMFWYRQDLGHGLRLSHYSYGVQDTNKG
EVSDGCSVSRSNTEDFPLTLESAASSQTSVYFCASSE
>V86RF-CABD02352500.1-trbv |(1100, 1391)|1.84629328686|(0.889,0.736,0.598)|1
AEVAQSPRYKITEKSQAVAFWCDPISGHATLYWYWQILGQGPELLVRFQDESVVDDSQLP
KDRFSAERLKGVDSTLKIQLAKLEDSAVYLCASSL
>V87RF-CABD02352501.1-trbv |(6663, 6963)|2.19582629921|(0.754,0.693,0.764)|1
CTDPGIIQSPKHEVTEMGQTVTLRCEPIFGHNLLFWYRETFVQGLELLSYFRSRSIIDNA
GMPTDRFSAERPDGSFSTLKIQPAEQGDSAVYVCASRL
>V88RF-CABD02352501.1-trbv |(16783, 17080)|2.44887343065|(0.965,0.978,0.720)|1
PVNAGVTQTPKFQVLKTGQSMTLQCAQDMNHDYMYWYRQDPGMGLRLIHYSVGAGITDKG
EVPNGYNVSRSNTEDFPLRLQSAAPSQTSVYFCASSY
>V89RF-CABD02352502.1-trbv |(788, 1088)|2.64277338538|(0.956,0.941,0.819)|1
HTGAGVSQSPRYKVAKRGRDVALRCDSISGHVTLYWYRQTLGQGSEVLTYFRSDAQRDKS
GRPSGRFSAERPERSVSTLKIQRTEQGDSAVYLCASSL
>V90RF-CABD02352503.1-trbv |(2597, 2893)|2.4490022856|(0.948,0.810,0.824)|1
SVETGVTQSPTHLIKTRGQQVTLRCSPQSGHNTVSWYQQALGQGPQLIFQYYREEENGRG
NFSPRFSGRQFPNYSSELNVNALELDDSALYLCASSL
>V91RF-CABD02352508.1-trbv |(1078, 1374)|2.66596254683|(0.954,0.833,0.937)|1
PVDAGVTQSPTHLIKTRGQQVTLRCSPQSGHNTVSWYQQALGQGPQFIFEYYEKEERGRG
NFPDRFSARQFPNYSSELNVNALLLGDSALYLCASSL
>V92RF-CABD02352508.1-trbv |(6352, 6643)|2.13540235426|(0.724,0.713,0.701)|1
NAGVTQTPKFHVVKTGQSMTLLCAQDMNHEYMYRYRQDPGKGLRLIYYSVAAALTDKGEV
PNGYNVSRSNTEDFPLKLESAAPSQTSVYFCGSSY
>V93RF-CABD02352509.1-trbv |(2773, 3083)|2.05765010594|(0.824,0.910,0.574)|1
HTGAGVSQAPRFKVTKRGQDVALRCDPISGHVALYWYRQALGQGPEFLTYFNDEAQPDKS
GMPNDRFSAERPEGSISTLTIQRTEQRDSAMYLCASSLARA
>V94RF-CABD02352509.1-trbv |(10643, 10939)|2.81382475433|(0.962,0.930,0.930)|1
LVDAGVTQSPTHLIKTRGQQVTLRCSPKSGHDTVSWYQQALGQGPQFIFQYYEEEERQRG
NFPDRFSGHQFPNYSSELNVNALLLGDSALYLCASSL
>V95RF-CABD02352510.1-trbv |(11938, 12229)|2.47862635215|(0.941,0.825,0.821)|1
NAGVTQTPKFHILKTGQSMTLQCAQDMNHGYMSWYRQDPGMGLRLIYYSAAAGTIDKGEV
PNGYNVSRLNTEDFLLRPVSAAPSQTSVYFCASSY
>V96RF-CABD02352511.1-trbv |(3159, 3459)|2.67873070067|(0.880,0.910,0.893)|1
HTGAGVSQSPRYKVTKRGQDVTLRCDPISSHATLYWYQQALGQGPEFLTYFNYEAQPDKS
GLPNDRFSAERPEGSNSTLTIQRTEQRDSAMYLCASSL
>V97RF-CABD02352511.1-trbv |(16331, 16627)|2.36586381383|(0.938,0.911,0.709)|1
PVDAGVTQSPTHLIKMRGQQVTLRCSPKSGHDTVSWYQQALGQGPQFIFEYYEKEERGRG
NFPDRFSARQFPNYSSELNVNPLLMGDSALYLCASSL
>V98RF-CABD02352511.1-trbv |(25598, 25898)|2.83653571945|(0.932,0.978,0.935)|1
HADTGVSQDPRHKITKRGQNVTFRCDPISEHNQLYWYRQTLGQGPEFLTYFQNEAQLEKS
RLLSDRFSAERPKGSFSTLEIQRTEQGDSAMYLCASSL
>V99RF-CABD02352512.1-trbv |(835, 1135)|2.83653571945|(0.932,0.978,0.935)|1
HADTGVSQDPRHKITKRGQNVTFRCDPISEHNQLYWYRQTLGQGPEFLTYFQNEAQLEKS
RLLSDRFSAERPKGSFSTLEIQRTEQGDSAMYLCASSL
>V100RF-CABD02352512.1-trbv |(7390, 7687)|2.66636983081|(0.934,0.821,0.965)|1
SVAAGVIQSPRHLIKEKRETATLKCYPIPRHDTVYWYQQGPGQDPQFLISFYEKMQSDKG
SIPDRFSAQQFSDYHSELNMSSLELGDSALYFCASSL
>V101RF-CABD02352513.1-trbv |(1353, 1650)|2.80403487493|(0.945,0.960,0.906)|1
HMDAGITQSPRHKVTEIGTPVTLRCHQTENHRYMYWYRQDPGHGLRLIHYSYGVKDTDKG
EVSDGYSVSRSKTEDFLLTLESATSSQTSVYFCAISE
>V102RF-CABD02352514.1-trbv |(8741, 9041)|2.48382797528|(0.938,0.774,0.885)|1
LIEAGVVQSPRYKIIEKKQPVAFWCNPISGHNTLYWYRQNLGQGPELLIRYENEEAVDDS
QLPKDRFSAERLKGVDSTLKIQPAELGDSAVYLCASSL
>V103RF-CABD02352514.1-trbv |(14343, 14643)|2.48239731778|(0.967,0.938,0.751)|1
HTDAGVIQSPRHEVTEMGQEVTLRCKPISGHNSLFWYRQTMMRGLELLIYFNNNVPIDDS
GMPKDRFSAKMPNASFSTLKIQPSEPRDSAVYFCASSL
>V104RF-CABD02352515.1-trbv |(2177, 2477)|2.49572120358|(0.952,0.938,0.753)|1
HTDAGVIQSPRHEVTEMGQEVTLRCKPISGHNSLFWYRQTMMRGLELLIYFNNNVPIDDS
AMPKDRFSAKMPNASFSTLKIQPSEPRDSAVYFCASSL
>V105RF-CABD02352520.1-trbv |(3657, 3957)|2.59254203176|(0.934,0.891,0.823)|1
HIEAGVTQFPSHSVIEKGQTVTLRCDPISGHDNLYWYRRVMGKEIKFLLHFVKESKQDES
GMPNNRFLAERTGGTYSTLKVQPAELEDSGVYFCASSQ
>V106RF-CABD02352520.1-trbv |(8783, 9080)|2.24579437076|(0.879,0.845,0.677)|1
HGDAMVIQNPRYQVTQFGKPVTLSCSQNLNHNIMYWYQQKSSQAPKLLFHYYDKDFNNEA
DTPDNFQSRRPNTSFCFLDISSPGLGDAAMYLCATSR
>V107RF-CABD02352525.1-trbv |(5450, 5746)|2.56816566048|(0.917,0.857,0.835)|1
LSNAGVMQNPRHLVRRRGQEARLRCSPMKGHSHVYWYRQLPEEGLKFMVYLQKENIIDES
GMPKERFSAEFPKEGPSILRIQQAVRGDSAAYFCASS
>V108RF-CABD02352526.1-trbv |(2325, 2622)|2.73929648886|(0.905,0.896,0.945)|1
TVDGGITQSPKYLFRKEGQNVTLNCEQNLNHDAMYWYRQDPGQGLRLIYYSQIVNDFQKG
DIAEGYSVSREKKESFPLTVTSAQKNPTAFYLCASSI
>V109RF-CABD02352526.1-trbv |(10210, 10519)|1.97752834179|(0.819,0.583,0.781)|1
GSGLGAVVSQHPSRVICKSGTSVKIECRCLDFQATTMFWYRQFPKQSLMLMATSNEGSKA
TYEQGVEKDKFLINHPNLTLSTLTVTSAHPEDSSFYICSAR
>V110RF-CABD02352526.1-trbv |(20182, 20482)|2.40538005186|(0.914,0.758,0.845)|1
STDTKVTQRPRLLVKASEQKAKMDCVPIKGHSYVYWYRKKLEEELKFLVYFQNEEIIQKA
EIINERFLAQCSKNSSCTLEIQSTESGDTALYFCASSK
>V111RF-CABD02352526.1-trbv |(29242, 29542)|2.61574282068|(0.909,0.922,0.818)|1
SFHAKVTQTPGHLVKGKGQKTKMDCTPEKGHTFVYWYQQNQNKEFMLLISFQNEQVLQET
EMHKKRFSSQCPSNTPCSLAILSSEPGDTALYLCASSQ
>V112RF-CABD02352529.1-trbv |(2516, 2814)|2.62006085876|(0.908,0.903,0.832)|1
SMDADVTQTPRNRITKTGKRIMLECSQTKGHDRMYWYRQDPGLGLRLIYYSFDVKDINKG
EISDGYSVSRQAQAKFSLSLESATPNQTALYFCATSD
>V113RF-CABD02352529.1-trbv |(16657, 16954)|2.3512900139|(0.898,0.954,0.682)|1
LMEADIYQTPRYLVIGTGKKITLECSQTMGHDKMYWYQQDPGMELHLIHYSYGVNSTEKG
GLSSESTVSRIRTEHFPLTLESARPSHTSQYLCASSE
>V114RF-CABD02352531.1-trbv |(24520, 24817)|2.47997353228|(0.849,0.925,0.760)|1
PLEAQVTQNPRYLITVTGKKLTVTCSQNMNHEYMSWYRQDPGLGLRQIYYSINVEAIDKG
DVPEGYNVSRKEKRNFPLILESPSPNQTSLYFCASSL
>V115RF-CABD02352532.1-trbv |(6479, 6776)|2.66328299872|(0.880,0.872,0.917)|1
LVDVKVTQSSRYLVKRMGEKVFLECVQDMDHENMFWYRQDPGLGLRLIYFSSDVKMKEKG
DIPEGYSVSREKKERFSLILESTSTNQTSMYLCASSL
>V116RF-CABD02377004.1-trbv |(3098, 3398)|2.58196782636|(0.871,0.809,0.932)|1
SMDTKVTQRPRLLVKANEQKAKMDCVPIKRHSYVYWYHKTLEEELKFLIYFQNEEIIQKA
EIINERFSAQCPQNSPCTLEIQSTESGDTARYFCANSK
>V117RF-CABD02377004.1-trbv |(12039, 12339)|2.33450667353|(0.802,0.762,0.779)|1
CFHAKVTQTPGYLVKGKGRKTKMYCTPENGHTFVCWYQQNQNKEFMFLISFQNEQVLQET
EMHKKRFSPQCPKNPPCSLAILSSEPGDTALYLCASSP
>V118RF-CABD02377005.1-trbv |(21584, 21875)|2.44465744694|(0.827,0.812,0.808)|1
LMEAEIYQTPRYHVIGTGKKITLECSQTMGHDKMYWSRSRNGITPHPPFLWVNSTEKGDL
SSESTVSRIRIEHFPLTLESASPSHTSQYLCASSE
>V119RF-CABD02377030.1-trbv |(2304, 2607)|2.43724715516|(0.819,0.794,0.827)|1
SVFSAVISQKPSRDICQRGTSMTIQCQVNSQVTMMFWYCQQPGQSVTLIATANQGSEATY
ESGFVIDKFPISCPNLTFSTLTVSNRSPEDSSIYLCSVE
>V120RF-CABD02105639.1-trdv |(1838, 2144)|2.22631178023|(0.776,0.662,0.934)|-1
RGMLCDKVTQSSPDQTVASGSEVVLLCTYDTVYSNPDLFWYRIRPDYSFQFVFYGDNSGS
QAADFTQGRFSVKHILTQKAFHLVISPVRTEDSATYYCAF
>V121RF-CABD02117385.1-ighv |(3331, 3640)|2.96680866856|(0.994,0.977,0.997)|-1
AHSQVQLVQSGAEVKKPGASVKVSCKASGYTFTGYAMHWVRQAPGQRLEWMGWINTGNGN
TKYSQKFQGRVTITRDTSASTAYMELSSLRSEDTAVYYCAR
>V122RF-CABD02117388.1-ighv |(2426, 2731)|1.90920817076|(0.801,0.568,0.747)|-1
VLSQITLKESGPTLVKPTQTLTLTCTFSGFSLSTSGTSVSWIRQPPGKALEWLAAIYSDD
DKRYSPSLKSRLTITKDTSKNQVVLTMTNMDPVDTATYYC
>V123RF-CABD02117395.1-ighv |(10192, 10503)|2.9283033276|(1.000,0.985,0.953)|-1
VQCEVQLVESGGGLVQPGRSLRLSCVASGFTFDDYAMHWVRQAPGKGLEWVSGISWNSGS
TGYADSVKGRFTISRDNAKNSLYLQMNSLRAEDTALYYCAKD
>V124RF-CABD02117395.1-ighv |(23380, 23689)|2.83140768219|(0.972,0.989,0.895)|-1
VHSQVQLVQSGAEVRKPGSSVKVSCKLSGGTFSSYAISWVRQAPGQGLEWMGGFIPILGT
ANYAQKFQGRVTITADESTSTAYMELSSLRSEDTAVYYCAR
>V125RF-CABD02117398.1-ighv |(503, 809)|2.86217712368|(0.930,0.998,0.955)|-1
VQCEVQLVESEGGLVQPGGSLRLSCAASGFTFSSYNMHWVRQAPGKGLEWVSAIGTGGDT
YYPGSVKGRFTISRENAKNSLYLQMNSLRAEDTAVYYCAR
>V126RF-CABD02117416.1-ighv |(7584, 7893)|2.94334298516|(0.993,1.000,0.956)|-1
VQCEVQLVESGGGLVQPGGSLRLSCAASGFTFSDYYMSWVRQAPGKGLEWVSGINWNGGS
TGYADSVKGRFTISRNNAKNSLYLQMNSLRAEDTALYYCAR
>V127RF-CABD02117419.1-ighv |(907, 1216)|2.99796800026|(0.998,1.000,1.000)|-1
VQCEVQLVESGGGLVKPGGSLRLSCAASGFTFSSYWMSWVRQAPGKGLEWVSVISSSGRT
TYYADSVKGRFTISRDNAKNSLYLQMNSLRAEDTAVYYCAR
>V128RF-CABD02117420.1-ighv |(2703, 3012)|2.98259608|(0.998,0.988,0.997)|-1
VQCDVQLVESGGGLVQPGGSLRLSCAASGFTFSSYGMSWVRQAPGKGLEWVSYISSSSSY
IYYADSVKGRFTISRDNAKNSLYLQMNSLRAEDTAVYYCAR
>V129RF-CABD02117421.1-ighv |(1503, 1818)|2.87184558231|(0.990,0.986,0.917)|-1
AQCEVQLVESGGGLVKPGGSLRLSCAASGFTFSNYYMEWVRQAPGKGLEWVGFIRTKAKG
GTTEYAASVKGRFTISRDDSKSIAYLQMNSLKTEDTAVYYCTR
>V130RF-CABD02117426.1-ighv |(5084, 5393)|1.80408269822|(0.963,0.818,0.568)|-1
AHAEVQLVQSGAEVKKPGASVKVSCKVSGYTLTELSMHWVRQASRKGLEWMGGFDPEDGE
TIYAQKFQGRVTMTEDTSTDTAYMELSSLRPEDMAVYYCAT
>V131RF-CABD02117430.1-ighv |(2094, 2408)|2.66670095336|(0.970,0.821,0.961)|-1
VLSQVTLKESGPVLVKPTETLTLTCTVSGFSLSNARMGVSWIRQPPGKALEWLAHIFSND
EKSYSTSLKSRLTISKDTSKSQVVLTMTNMDPVDTATYYCAWI
>V132RF-CABD02117431.1-ighv |(1312, 1621)|2.86769746084|(0.995,0.985,0.914)|-1
AHSQVQLVQSGSEVKKPGASVKVSCKASGYTFTSYGMNWVRQAPGQGLEWMGWINTYTGN
PTYAQGFTGRFVFSMDTSVSTAYLQISSLKAEDTAMYYCAR
>V133RF-CABD02117438.1-ighv |(419, 731)|2.42402243897|(0.863,0.973,0.717)|-1
VLSQVQLQQWGPGLVKPSETLSLTCAVYGGSISSSDYYWSWIRQPPGKGLEWIGLINYVR
STNYNPSLKSRVTISVDTSKNQFSLKLSSVTAADTAVYYCAR
>V134RF-CABD02117439.1-ighv |(2063, 2375)|2.81018966345|(0.915,0.924,1.000)|-1
VLSQVQLQQWGTGLVKPSETLSLTCAVYGGSISSDGYYWSWIRQPPGKGLEWIGYIYYSG
STYYNPSLKSRVTISVDTSKNQFSLKLSSVTAADTAVYYCAR
>V135RF-CABD02117442.1-ighv |(1416, 1725)|2.89051087214|(0.944,0.960,1.000)|-1
VQCQVQLVESAGGVVQPGRSLTLSCTASGFTFSSYGMHWVRQAPGKGLEWVAVISYDASN
KYYAASVKGRFTISRDNSKNTLYLQMNSLRAEDTAVYYCAK
>V136RF-CABD02117444.1-ighv |(7682, 7991)|2.99496000066|(0.997,0.998,1.000)|-1
VQCQVQLVESGGGVVQPGRSLRLSCTASGFTFSSYGMHWVRQAPGKGLEWVAVISYDASN
KYYADSVKGRFTISRDNSKNTLYLQMNSLRAEDTAVYYCAK
>V137RF-CABD02117445.1-ighv |(8585, 8891)|2.24918960296|(0.897,0.912,0.653)|-1
VLSQVQLQQWGAGVVKPSETLSLTCAVYGGSFSGYYWNWIRQPPGKGLEWIGRISYDGST
NYNPSLKSRVTISVDTSKNQFSLKLSSVTAADTAVYYCAR
>V138RF-CABD02117454.1-ighv |(1407, 1716)|2.63786144672|(0.986,0.979,0.801)|-1
VLSQVQLQESGPGLVKPSETLSLTCVVSGGSISSSNWWSWVRQPPGKGLEWIGEIYHSGS
PNYNPSLKSRVTISVDKSKNQFSLKLSSVTATDTAVYYCAR
>V139RF-CABD02117457.1-ighv |(5100, 5407)|2.88264949271|(0.986,0.991,0.922)|-1
VQCEVQLVESGGGLVQPEGSLKLSCAASGFTFSSYAMDWVRQAPGKGLEWVAHIWNDGSQ
KYYADSVKGRFTISRDNSKSMLYLQMDSLKAEDTAMYYCT
>V140RF-CABD02117463.1-ighv |(7715, 8026)|2.74020583121|(0.988,0.992,0.842)|-1
VQCEVQLVESGGGVVQPGRSLRLSCAASGFTFDDYAMHWVRQAPGKGLEWVSRISWGGGS
TYYADSVKGLFTISRDNSKISLYLQMNSLRAEDTALYYCAKD
>V141RF-CABD02117467.1-ighv |(8162, 8468)|2.80551454521|(0.982,0.878,0.988)|-1
AQCEVQLVESGGGLVQPGGSLRPSCAASGFAFSSYVLHWVRRAPGKGLEWVSAIGTGGDT
YYADSVMGRFTISRDNAKKSLYLQMNSLIAEDMAVYYCAR
>V142RF-CABD02117467.1-ighv |(15696, 16005)|2.947794597|(0.997,0.976,0.978)|-1
AHSQVQLVQSGAEVKKPGASVKVSCKASGYTFTSYYMHWVRQAPGQGLEWMGIINPSGGS
TSYAQKFQGRVTMTRDTSTSTVYMELSSLRSEDTAVYYCAR
>V143RF-CABD02117467.1-ighv |(19808, 20117)|2.91090442409|(0.978,0.963,0.971)|-1
AYSQMQLVQSGAEVKKTGASVKVSCKASGYTFTYRSLHWVRQAPGQALEWMGWITPYNGN
TNYAQKFQDRVTITRDRSMSTAYMELSSLRSEDTAVYYCAR
>V144RF-CABD02117471.1-ighv |(687, 996)|2.90787897521|(0.991,0.982,0.944)|-1
VQCDVQLVQSGGGLVQPGGSLRLSCAASGFTFSSYWMHWVRQAPGKGLEWVANIKKDGSG
KYYVDSVKGRFTISRDNAKNSLYLQMNSLRAEDTAVYYCAR
>V145RF-CABD02117473.1-ighv |(12286, 12601)|2.95802424585|(0.979,0.991,0.989)|-1
VQCEVQLVESGGGLVKPGGSLRLSCTASGFTFGDYTMSWVRQAPGKGLEWVGFIRSKAYG
GTTEYAASVKGRFTISRDDSKSIAYLQMNSLKTEDTAVYYCTT
>V146RF-CABD02117475.1-ighv |(3413, 3725)|1.55812521412|(0.480,0.569,0.578)|-1
SNQNISVFSGVQGEAQLTESGEDLVHLEGPLRLSCAASWFTFSIYEIHWVCQASGKGLEW
VAVIWHGESHQYNADYVRGRLTTSRDNTKYMLYMQMNSLRTQ
>V147RF-CABD02117475.1-ighv |(8201, 8508)|2.73576135814|(0.913,0.966,0.874)|-1
VCAEVQLVQSAAEVKRPGESLRISCKGSGYSFTSYWIGWVRQMPGKGLEWMGIIYPGDSD
TRYSPSFQGQVTISADSSISTAYLQWSSLKASDTAMYYCA
>V148RF-CABD02117477.1-ighv |(2704, 3013)|2.95630128432|(0.991,0.996,0.971)|-1
VQCEVQLVESGGGLVQPGGSLRLSCVASGFTFSSYAMSWVRQAPGKGLEWVSTISSTGGS
TWYPGSVKGRFTISRDNSKNTLYLQMNSLRAEDTAVYYCAK
>V149RF-CABD02117481.1-ighv |(9894, 10203)|1.82746249862|(0.986,0.551,0.872)|-1
ILSQVQLQESGPGLVKPSETLSLTCAVSGDSISSGNWWIWVRQPPGKGLEWIGEINHSGS
TYYNPSLKSRITMSVDTSKNQFSLKLSSVTAADTAVYYCAR
>V150RF-CABD02117482.1-ighv |(11133, 11445)|2.96807224753|(1.000,0.973,0.998)|-1
VLSQVQLQESGPGLVKPSQTLSLTCTVSGGSISSGSYYWSWIRQPPGKGLEWIGYIYYSG
STNYNPSLKSRVTISVDTSKNQFSLKLSSVTAADTAVYYCAR
>V151RF-CABD02117482.1-ighv |(15935, 16229)|2.90156465803|(0.986,0.966,0.955)|-1
QLVQSGPEVKKPGASVKVSCKASGYTFTSSAMQWVRQAPGQGLEWIGWIIVGSGNTNYAQ
KFQGRVTITRDTSTSTAYMELSSLRSEDMAVYYCAA
>V152RF-CABD02117487.1-ighv |(1480, 1789)|2.9919000027|(0.995,0.999,0.998)|-1
VQCEVQLVESGGGLVQPGGSLRLSCAASGFTFSSYHMSWVRQAPGKGLEWVSVIYSDGSS
TYYAASVKGRFTISRDNSKNTLYLQMNSLRAEDTAVYYCAR
>V153RF-CABD02117492.1-ighv |(7493, 7808)|2.89686871865|(0.982,0.986,0.937)|-1
VQCEVQLVESGGGLVQPGGSLRLSCAASGFTFSNYYKSWVCQAPGKGLEWVRFIRNKANG
GTTEYTTSVKGRFTISRDDSKSITYLQMNSLKTEDTAVYYCSR
>V154RF-CABD02117494.1-ighv |(3416, 3731)|2.95061102934|(0.967,0.999,0.991)|-1
VQCEVQLLESGGGLVQPGGSLRLSCAASGFTFSDHYMDWVRQAPGKGLEWVGRIRNKANS
YTTEYAASVKGRFTISRDDSKNSLYLQMNSLKTEDTAVYYCTT
>V155RF-CABD02117499.1-ighv |(3042, 3351)|2.97380255864|(0.979,0.999,0.999)|-1
VQCEVQLLESGGGLVQPGGSLRLSCAASGFTFSSYWMHWVRQAPGKGLEWVSRINSDGSS
TSYADSVKGRFTISRDNAKNTLYLQMNSLRAEDTAVYYCAR
>V156RF-CABD02117506.1-ighv |(3288, 3597)|2.81298174675|(0.979,0.972,0.892)|-1
TYSQVQLVQSGHEVKQPGASVKVSCKASGYSFTSYGMNWVRQAPGQGLEWMGWFNTYTGN
PTYAQGFTGRFVFSMDTSVSTAYLQISSLKAEDTAMYYCAR
>V157RF-CABD02117545.1-ighv |(2488, 2803)|2.72799188621|(0.881,0.919,0.956)|-1
VQCEVQLVESGGGLVQPGGSLRLSCAASGFTFSDHYRSWVRQAQGKGLELVGLIRNKANS
YTTEYAASGKGRFTISRGDSKNTLYLQMSSLKTEDLAVYYCAR
>V158RF-CABD02117766.1-ighv |(420, 729)|2.86636319834|(0.974,0.940,0.958)|-1
AHSQVQLVQSGAEVKKPGASVKVSCKASGYTFTDYYMHWVRQAPGQGLEWMGRINPNSGG
TNYTQKFQGRVTMTRDTSISTAYMELSRLRSEDTATYYCAR
>V159RF-CABD02117767.1-ighv |(2221, 2530)|2.9291290053|(0.967,0.985,0.979)|-1
AHSQVQLVQSGAEVKKPGASVKVSCKASGYTFTGYYMHWVRQAPGQGLEWMGWINPNSGG
TNYAQKFQGRVTMTRDTSISTAYMELSRLRSEDTATYYCTR
>V160RF-CABD02136430.1-ighv |(23813, 24119)|2.7940613815|(0.914,0.911,0.995)|-1
VQCEVHLVQSGGGLVQPGGSLRLSCAGSGFTFSSHAMHWVRQAPGKGLEWVSAIGTGGGT
YYADSVKGRFTISRDNAKNSLYLQMNSLRAEDMAVYYCAR
>V161RF-CABD02136430.1-ighv |(37941, 38248)|2.95778801933|(0.989,0.982,0.987)|-1
AQCEVQLVESGGGLVQPGGSLRLSCAASGFTFSNHYTSWVLQAPGKGLEWVSYISGDSDY
TNYADSVKGRFTISRDNAKNSLYLRMNSLRAEDTAVYYCV
>V162RF-CABD02196508.1-igkv |(4447, 4759)|2.52944230567|(0.851,0.953,0.784)|-1
CNGDIVLTQSPASLAMSPGQRATITCRASECVSFLGINLIHWYQQKPGQPPKLLIYQASN
KDIGVPARFSGSGSGTDFTLTINPVEANNTAKYYCLQSKNFP
>V163RF-CABD02196513.1-igkv |(3814, 4114)|2.94076801985|(0.977,0.980,0.984)|-1
AKCDIQMTQSPSTLSASVGDRVTITCRASQGISKLLAWYQQKPGKAPKLLIYAASSLESG
VPSRFSGSGSGTEFTLTISSLQPDDFATYYCQQHSSTP
>V164RF-CABD02196515.1-igkv |(8253, 8553)|2.72496508784|(0.996,0.832,0.999)|-1
ARCDIRMTQSPSSLSASVGDRVTITCRASQGIRNDLGWYQQKPGKAPKILIYAASSLQSG
VPSRFSGSGSGTDFTLTISSLQPEDFATYYCLQDYNYP
>V165RF-CABD02196517.1-igkv |(684, 984)|2.49816485805|(0.998,0.961,0.755)|-1
TTGEIVMTQSPATLSLSPGERATLSCRASQSVSSYLTWYQQKPGQAPRLLIYGASTRATG
IPARFSGSGSGTDFTLTISSLQPEDFAVYYCQQHSNWP
>V166RF-CABD02196521.1-igkv |(5557, 5857)|2.96860007999|(0.993,0.993,0.983)|-1
ARCDIQMTQSPSSLSASVGDRVTITCRASQGISKWLAWYQQKPGKAPKRLIYAASSLESG
VPSRFSGSGSGTEFTLTISSLQPEDFATYYCLQYNSYP
>V167RF-CABD02196542.1-igkv |(3007, 3305)|2.64044089838|(0.994,0.795,0.998)|-1
SRGEIVLTQSPDFQSVTPKEKVTITCRASQSIGSSLHWYQQKPDQSPKLLIKYASQSISG
VPSRFSGSGSGTDFTLTINSLEAEDAATYYCQQSSSL
>V168RF-CABD02196545.1-igkv |(4900, 5202)|2.40780860699|(0.926,0.764,0.844)|-1
SSGDIVMTQTPLSLPVTNGEPASISCRSSQSLVHSDGNTYLNWIQQRPGQPPRLLIYKVS
NRFSGVPDRFSGSGAGTDFTLKISRVEAEDVAVYYCTQG
>V169RF-CABD02196547.1-igkv |(2239, 2541)|2.85563475291|(0.980,0.924,0.965)|-1
SSGDVVMTQSPLSLPVTLGQPASISCRSSQSLVYSDGNTYLNWFQQKPGQSPRRLIYKVS
NRDSGVPDRFSGSGSGTDFTLEISRVEAEDVGVYYCMQG
>V170RF-CABD02196553.1-igkv |(790, 1090)|2.86026649556|(0.992,0.910,0.985)|-1
ARCDIQLTQSPTSLSASVGDRVTITCQASQGISNNLAWYQQKPGKVPKLLIYSASSLQSG
VPSRFSGSGSGTDFTLTISSLQPEDVATYYCQRTYNAP
>V171RF-CABD02196556.1-igkv |(192, 492)|2.96688223716|(0.997,0.998,0.974)|-1
ARCDIQMTQSPSSLSASVGDRVTITCRASQSVSNYLSWYQQKPGKAPKLLIYAASSLQSG
VPSRFSGSGSGTDFTLTISSLQPEDFATYYCQHGYGTP
>V172RF-CABD02196559.1-igkv |(8610, 8928)|2.49362530671|(0.976,0.784,0.896)|-1
SSGDIVMTQTPLSLPVTPGQPASISCRSSQSLLDSDDGNTYLYWYLQKPGQSPQLLIYEV
SNRASGVPDRFSGSGSGTDFTLKISRVEAEDVGVYYCMQSRELP
>V173RF-CABD02196901.1-igkv |(2814, 3114)|2.95552296609|(1.000,0.963,0.998)|-1
DRCDIQMTQSPSSLSASVGGRVTITCRASQGISNNLNWYQQKPGKTPKLLIYAASSLQSG
IPSRFSDSGSGTDYTLTISSLQPEDFAAYYCQQSDSTP
>V174RF-CABD02196902.1-igkv |(2361, 2661)|2.11731051259|(0.965,0.851,0.661)|-1
AKCAIQMTQSPSSLPASTGDRVTITCQASQGIGSYLNWYQQKPGKSPKLLIYYASYLQSG
IPSRFSGSGSGTDFTLTIDCLQPEDFATYYCEQSYGTP
>V175RF-CABD02320526.1-igkv |(17600, 17903)|2.0008881569|(0.997,0.561,0.977)|-1
TTGEIVLTQSPATLSSSPGERATLSCRASQSVSSSYLAWYQQKPGQAPRLLIYDASSRAT
GIPDRFSGSGSGTDFTLTISRLEPEDFAVYYCQQYSNWP
>V176RF-CABD02337330.1-trgv |(3128, 3432)|1.5884473343|(0.808,0.559,0.600)|-1
HLEQPQISSTKMLSKTARLECVVSGVTISATSVYWYRERPGEVIQFLVSISYDGTVRKES
GIPSGKFEVDRIPETSTSTLTIHNVEKQDIATYYCALWE
>V177RF-CABD02337338.1-trgv |(1057, 1370)|2.80447706835|(0.973,0.950,0.903)|-1
SQKSSNLEGRTKSVTRQTGSSAEITCDLTVTNTFYIHWYLHQEGKAPQRLLYYDVSTARD
VLESGLSSGKYYTHTPRRWSWILRLQNLIENDSGVYYCATWD
>V178RF-CABD02337338.1-trgv |(5430, 5730)|2.10421604559|(0.774,0.643,0.755)|-1
SQKSSNLEGRTKSVTRPPGSSAVITCDLPVENAAYIHWYLHQEGKAPQRLLYYDSYNSRV
VLESGISREKYHAYASTGKSLKFIVENLIEHDSGVYYC
>V179RF-CABD02337341.1-trgv |(2313, 2626)|2.63752579019|(0.961,0.818,0.939)|-1
SQKSSNLEGRTKSVIRQTGSSAEITCDLDGGSTGYIHWYLHQEGKAPQRLQYYDSYNSKV
VLESGVSPGKYYTYTSTRKNLRLILRNLIENDSGVYYCATWD
>V180RF-CABD02352555.1-trbv |(30194, 30488)|2.00605016158|(0.791,0.747,0.605)|-1
VRSQTIHQWPATLVQPVGSPLSLECTVEGTSNPNLYWYRQAAGRGLQLLFYSAGIGQISS
EVPQNLSASRPQDRQFILSSKKLLLSDSGFYLCAWS
>V181RF-CABD02379427.1-igkv |(3027, 3327)|2.99798400013|(1.000,1.000,0.998)|-1
ARCDIQMTQSPSSLSASVGGRVTITCRASQGISNNLNWYQQKPGKTPKLLIYAASSLQSG
IPSRFSDSGSGTDYTLTISSLQPEDFAAYYCQQSDSTP
>V182RF-CABD02379503.1-igkv |(6201, 6501)|2.96063747374|(1.000,0.967,0.998)|-1
ARCDIQMTQSPSSLSASVGGRVTITCRASQDISNNLNWYQQKPGKTPKLLIYAASSLQSG
IPSRFSDSGSGTDYTLTISSLQPEDFAAYYCQQSDSTP
>V0RF-AQIA01007566.1-iglv |(12275, 12573)|1.87905222695|(0.795,0.563,0.731)|1
LCALPVLTQPPSASASLGASVKLTCTLSSEHSNYFIFWYQQRPGRSPRYIMKVNSDGTQS
KGDGIPDRFLGSSSGADRYLTISNLQSDDEAEYYCGE
>V1RF-AQIA01007569.1-iglv |(1992, 2302)|2.45583763492|(0.823,0.833,0.802)|1
SWAQSAPIQSPSVSGSLGQSVTISCTGTSSDIGRYNYVSWYRQQPGTTTKLMMYKVNMRP
SGVSDRFSGSKSGNTASLTISGLQAEDEADYYCSSYEASDT
>V2RF-AQIA01007574.1-iglv |(14067, 14370)|2.83083948459|(0.986,0.911,0.959)|1
SWAQAAPTQPPSVSGSPGQSVTISCTGTSSDIGGYNRVSWYQQHPGKAPKLMIYEVSKRP
SGVSDRFSGSKSGNTASLTISGLQAEDEADYYCSSYAGS
>V3RF-AQIA01007574.1-iglv |(23703, 24024)|1.73664489384|(0.617,0.570,0.568)|1
SVVSSELAQESAVSVALLQMARRITCQGDGIGNYYTNWCQQKPGRALVGVTCGNNCPSGI
PDKFSGSKSEKKAILTITGTQVEDEADYYFLSRQQWYSSHSDITH
>V4RF-AQIA01007574.1-iglv |(37774, 38077)|2.8281344055|(0.940,0.915,0.983)|1
SAASYELTQPPSVSVSPGQTARITCSGDALPKKYAYWFQQKPGQSPVLIIYEDSKRPSGI
PERFSGSSSGTVATLTISGAQVEDEADYYCYSTDSSGNH
>V5RF-AQIA01007574.1-iglv |(45212, 45518)|2.27259652375|(0.849,0.676,0.861)|1
SVASYELTQPLSVSVALGQMARITCGGNNIGRKYVYWYQQKPDQAPVLVIYEDSKRPSGI
PEQFSGSNSGNTATLTIDGAQARDEADYYCQVWDSSTAHS
>V6RF-AQIA01007574.1-iglv |(48578, 48881)|2.80620443258|(0.994,0.928,0.922)|1
SWAQAALTQPPSVSGSPGQSVTISCTGTSSDIGGYNRVSWYQQHPGKAPKLMIYEVSKRP
SGVSDRFSGSKSGNTASLTISGLQAEDEADYYCSSYASS
>V7RF-AQIA01007575.1-iglv |(6771, 7074)|2.91152806591|(0.993,0.957,0.969)|1
SWAQAALTQPPSVSGSPGQSVTISCTGTSSDVGGYNYVSWYQQHPGKAPKLMIYDVSKRP
SGVSDRFSGSKSGNTASLTISGLQAEDEADYYCSSYAGS
>V8RF-AQIA01007575.1-iglv |(13644, 13941)|2.32545146848|(0.893,0.675,0.939)|1
SVASYELTQPPSVSVSPGQTAKITCSGEILAKKYARWFQQKPGQAPVLVIYKDSERPSGI
PERFSGSSSGTTVTLTVSGAQAEDEADYYCYSGDDNS
>V9RF-AQIA01007576.1-iglv |(8743, 9046)|2.799864822|(0.985,0.914,0.932)|1
SAVSYELTQPPSVSVSPGQTARITCGGDNLGSKYVHWYQQKPAQAPVLVIYYDSDRPSGI
PERFSGSKSGNTATLTISGVEAGDEADYYCQVWDSSSDH
>V10RF-AQIA01007576.1-igkv |(13221, 13532)|1.68381313978|(0.759,0.513,0.663)|1
SVVSSELTQEPALSVALGHTVRMTCQGDSLKTYYASWYQQKPGQVPVLVIYGNNYRPSGI
PGRFSVSWSGNTGSLTITAAQVEDEADYYCNSWDSSGTHLTV
>V11RF-AQIA01007576.1-iglv |(19712, 20015)|2.84904856847|(0.991,0.922,0.959)|1
SWAQAALTQPRSVSGSPGQSVTISCTGTSSDIGGYNYVSWYQQHPGTAPKLMIYEVSKRP
SGVSDRFSGSKSGNTASLTISGLQAEDEADYYCCSYAGS
>V12RF-AQIA01007576.1-iglv |(29309, 29606)|2.19263172888|(0.698,0.779,0.754)|1
SVASYELTQPPLVSVSPGQTARITCSGDVLKENYADWYQQKPGQAPVLLIHEDSKRPSGI
PERFSGSTSGHTTTLTISSTLSEDEADYSCFSGNENN
>V13RF-AQIA01007576.1-iglv |(37606, 37909)|2.40848161286|(0.969,0.708,0.970)|1
SAASYDVTQPRSVSVSPGQTARITCGGDNIGSKVVHWYQQKPAQAPVLVIYRDSNRPSGI
PERFSGSNSGNTATLTISGVEAGDEADYYCQVWDSSSDH
>V14RF-AQIA01007576.1-iglv |(45242, 45545)|2.70324853765|(0.945,0.847,0.949)|1
SVVSSELTQDPAVSVALGQTVRITCQGDSLRSYYASWYQQKPGQAPVLVVYGNNNRPSGI
PERFSGSSSGNTASLTITGAQVEDEADYYCDSWDSSGTH
>V15RF-AQIA01007576.1-igkv |(63773, 64083)|2.49863603364|(0.872,0.809,0.838)|1
SWAQAALTQPPSVSKSLGQSVTISCAGTSSGIASYSDVSWYQQHPGTAPRLLIYRVSNRP
SGVSDRFSGFKSGSTASLTISGLQAEDEAIYYCCSYRSGST
>V16RF-AQIA01007576.1-iglv |(72187, 72490)|2.7790705812|(0.962,0.878,0.967)|1
SATSYELTQPPSVSAASGQTARITCGGDNIGSKNVQWYQQKPAQAPVLVIYADSDRPSGI
PERFSGSNSGNTATLTISGVEAGDEADYYCQVWDSSSDH
>V17RF-AQIA01007583.1-iglv |(3311, 3618)|1.67479687751|(0.553,0.716,0.513)|1
LTSQAEVIQETSRTTNPGETITLTCGSSAGAVTTSNYADWFQQKPNQVPRGLIGDNTYRN
PNVPERFSGSLRAGKAVLTITGAQPEDEAFYYCALWSTDH
>V18RF-AQIA01007584.1-iglv |(1279, 1588)|2.83874179091|(0.972,0.936,0.940)|1
SWAQSVLTQPPSASEAARKSVTISCSGSSSNIGSNSVSWYQQLPGTAPKLLIYYNDQRAS
GVSDRFSGSKSGTSASLAISGLQTEDEADYYCAAWDDSLSG
>V19RF-AQIA01007585.1-iglv |(7569, 7879)|2.49563363066|(0.957,0.868,0.798)|1
SLSQPVLTQPASLSASPGASASLTCTFSGGINVAGYHIFWYQQKPGSPPRYLLRYKSDSD
KGQGSGVPSRFSGSKDASANTGILRISGLQSEDEADYYCAI
>V20RF-AQIA01007586.1-iglv |(10044, 10351)|1.89305329814|(0.798,0.863,0.518)|1
SNSQAVVTQEPSLTVSRGGTVTLTCGSSAGAVTGSHYPYWFQQKPGQAPRTLIYNTNFKH
SWTPARFSGSLLGGKAALILSGAQPEDEAEYYCLLHYSGA
>V21RF-AQIA01007586.1-iglv |(17179, 17489)|2.74326541037|(0.955,0.897,0.912)|1
SLSQPVLTQPTSLSASPGASARLSCTLSSGINVGSYSIYWYQQKPGSPPRYLLYYYSDSS
KHQGSGVPSRFSGSKDASANAGLLLISGLQSEDEADYYCAI
>V22RF-AQIA01007586.1-iglv |(27894, 28201)|2.62102134678|(0.900,0.805,0.972)|1
SWAQSVLTQPPSVSAVPGQKVTISCSGSSSNIGRSCVSWYQQVPGTAPKLLIYQDNKRPS
GVSDRFSGSKSGTSASLAITGLQTGDEADYYCSAWDSSLS
>V23RF-AQIA01007586.1-iglv |(32056, 32365)|2.66638325905|(0.906,0.935,0.844)|1
SWAQSVLTQPPSVSGDPGQRVTISCTGSSSNIGGYDVYWYQQLPGTAPKLLIYENNKRPS
GVSDRFSGSKSGTSASLAITGLQSEDEAEYYCETWDNSLNG
>V24RF-AQIA01007586.1-iglv |(37066, 37373)|2.77341837656|(0.978,0.891,0.940)|1
SWAQSVLTQPPSVSGDPGQRVTISCTGSSSNIGGYYVYWYQQFPGTAPKLLIYDNNKRPS
GVSDRFSGSKSGTSASLTITGLQPGDEADYYCGAWDSSLS
>V25RF-AQIA01007586.1-iglv |(42885, 43192)|2.85545134312|(0.978,0.941,0.946)|1
SWAQSVLTQPPSVSGAPGQRVTISCTGSSSNIGGYYVSWYQQLPGTTPKLLIYQDNKRPS
GVSDRFSGSKSGTSASLTITGLQTEDEADYYCLSYDSSLS
>V26RF-AQIA01007587.1-iglv |(5318, 5628)|2.58324013088|(0.965,0.805,0.919)|1
SLSQPVLTQPTSLSASPGASVRLTCTLRSGISVGGYNIHWYQQKPGSPPRYLLYYYSDSN
KGQGSGVPSRFSGSKDASANAGILLISGFQSEDEADYYCTT
>V27RF-AQIA01007587.1-iglv |(10143, 10452)|2.88922051637|(0.982,0.942,0.972)|1
SWAQSVLTQPPSASGAPGQSVTISCSGSSSNIGSNYVNWYQQLSGKAPKLLIYNNNQRPS
GVPDRFSGSKSGTSASLAISGLQSEDEADYYCAAWDSSLSG
>V28RF-AQIA01007588.1-iglv |(1406, 1715)|2.88223918747|(0.990,0.934,0.972)|1
SWAQSVLTQPPSASGAPGQSVTISCSGSSSNIGSNDVYWYQQFPGTAPKLLIYYSNQRPS
GVPDRFSGSKSGTSASLAITGLRSEDEADYYCAAWDDSLSS
>V29RF-AQIA01007588.1-iglv |(10372, 10658)|2.07501562895|(0.827,0.865,0.590)|1
TQEPSLTVSPGGTVTLTCASSTGAVTSGHYPHWFQQKPGQAPKTLIYDTSNKLSWTPARF
SGSLAGGKAALTLSGAQPEDEAEYYCLLYYSGA
>V30RF-AQIA01007588.1-iglv |(19880, 20189)|2.46625134607|(0.901,0.730,0.959)|1
SWAQSVLTQPPSASGAPGQSVTISCSGSSSNIRGNGVHWYQQLSGMAPKLLIYNNNQRPS
GVPDRFSGSKSGTSASLAITGLRSEDEADYYCEAWDNSLSG
>V31RF-AQIA01007588.1-iglv |(28944, 29251)|2.16106576492|(0.844,0.813,0.649)|1
SNSQAVVTQEPSMTVSPGGTVTLTCASSTGAVTSGHSPHWFQQKPGQAPKTLIYNTNYKH
SWTPARFSGSLLGGKAALTLSGAQPEDEAEYYCWLYYSGA
>V32RF-AQIA01007589.1-iglv |(4140, 4447)|2.89938935955|(0.984,0.961,0.959)|1
SWAQSVLTQPPSVSGAPGQRVTISCTGSSSNIGGYYVQWYQQLPGTAPKLLIYENNKRPS
GVSDRFSGSQSGTSASLTITGLQSEDEADYYCQSYDSSLS
>V33RF-AQIA01007589.1-iglv |(20045, 20346)|1.84587036738|(0.591,0.869,0.691)|1
SLSQPVLTQPSSASASLGASVTLTCTLSSGYSNYAVDWHQQRPGKGPQFVMRVGTGGIVG
SKGDGIPDRFSGSGSGLNRYLTIKNIQEEDESDYHCGA
>V34RF-AQIA01007589.1-iglv |(26788, 27098)|2.76062284503|(0.963,0.908,0.912)|1
SLSQPVLTQPTSLSASPGASARLTCTLSSGISVGSYRIFWYQQKPGSPPRYLLNYHTDSD
KHQGSGVPSRFSGSKDASANAGILLISGLQSEDEADYYCMI
>V35RF-AQIA01007590.1-iglv |(12131, 12441)|2.83397825001|(0.950,0.918,0.972)|1
SWAEVVFTQPHSVSGSPGQTVTISCTRSSGSIGSSYVYWYQQRPGSAPTTVIYKDNQRPS
GVPDRFSGSIDSSSNSASLTISGLKSEDEADYYCQSYDSSG
>V36RF-AQIA01007590.1-iglv |(54569, 54888)|2.05932617902|(0.796,0.627,0.752)|1
SPGASASLTCTFSGGTNVGDYTIHWYQQKPGSPPRYLLKYKSDSDKHQGSGVPSRFSGSK
DASVNTGILRISGLQSEDEADYYCAIGRSSASHSDTHRWGSGTK
>V37RF-AQIA01007590.1-iglv |(59340, 59647)|2.12518522193|(0.943,0.696,0.791)|1
SWAQSVLTQPPSVSAAPGQRVTISCSGSSFNFRRYYVSWYQQLPGAAPKLLIYDVSKRPS
GVLDRFSGSQSGTSTTLGITGLQSEDEADYYCSAWDSSLS
>V38RF-AQIA01007599.1-igkv |(24865, 25175)|2.13790738068|(0.724,0.763,0.669)|1
SLSQPVLTQSPSASASLGASVKLTCTLSSGHSSYAIAWHQQQQGKAPRYLMRLNSDGSHS
KGDGIPDRFSGSSSGAERYLTISNLQSEDEADYYCQTWDTG
>V39RF-AQIA01007600.1-iglv |(7012, 7324)|2.78219505434|(0.941,0.880,0.983)|1
SWAEVVFTQPHSVSGSPGQTVTISCTRSSGSIDSKYVQWYQQRPGSAPTTVIYKDNQRPS
GVPDRFSGSIDSSSNSASLAISGLKSEDEADYYCQSADGSYN
>V40RF-AQIA01007601.1-iglv |(95905, 96206)|2.20407701393|(0.818,0.636,0.902)|1
VQAGLTQPPSVSKGLRQTATLTCTGNSNNVGNQGAAWLQQHQGHPPKLLSYRNNNRPSGI
SERFSASRSGNTASLTITGLQPEDEADYYCSAWDSSLS
>V41RF-AQIA01007605.1-iglv |(38320, 38626)|2.79855916475|(0.908,0.967,0.942)|1
DSETVVTQEPSLSVSPGGTVTLTCGLSSGSVSTSNYPSWYQQTPGQAPRTLIYSTNTRPS
GVPDRFSGSILGNKAALTITGAQADDESDYYCTLYMGSGI
>V42RF-AQIA01007915.1-ighv |(45465, 45774)|2.37834337598|(0.925,0.962,0.692)|1
VQCEVQLVEPGGGLVQPGGSMRLSCAASGFTFSSYGMSWVHQTPGKGLEWVSTISGNGVS
TWYPDAVKGQFTISRNNTKNSLYLQMNSLSVEDIAVYYCAK
>V43RF-AQIA01009600.1-iglv |(7837, 8140)|2.92045386218|(0.986,0.965,0.972)|1
SWAQSAPTQPPSVSGSPGQSVTISCTGTSSDVGGYNYVSWYQQHPGKAPKLMIYGVSKRP
SGVSDRFSGSKSGNTASLTISGLQAEDEADYYCCSYTTS
>V44RF-AQIA01009600.1-iglv |(20648, 20951)|2.56068155685|(0.964,0.880,0.822)|1
SAASYDLTQPPSVSVSPGQTARITCGGDNIGSEVVNWYQQKPPQAPVLVIYADSERPSGI
PERFSGSNSGNTATLTISGVEAGDEADYYCQVWDISSDH
>V45RF-AQIA01009600.1-igkv |(28113, 28416)|1.77890086034|(0.769,0.527,0.707)|1
SVVSSGLTQEPALSVALGHTVRMTCQGDSLKTYYASWYQQKPGQVPVLVIYGNNYRPSGI
PGRFSVSWSGNTGSLTITAAQVEDEADYYCNSWDSSGTH
>V46RF-AQIA01009608.1-iglv |(4448, 4751)|2.71174714857|(0.959,0.870,0.920)|1
SWAQSALTQPPSVSKSLGQSVTISCTGTSSDIGGYNGVSWYQQHSGTAPRLLIYEVSKRP
SGVSDRFSGSKSGNTASLTISGLQAEDEADYYCCSYRSG
>V47RF-AQIA01017094.1-igkv |(176237, 176552)|2.66955212988|(0.989,0.941,0.837)|1
SSGDIVMTQTPLSLSVTPGEPASISCRSSQSLLHSNGYTYLHWYLQKPGQSPQLLIYLVS
NRPSGVPDRFSGSGSGTDFTLKISRVEAEDVGVYYCEQTLQTP
>V48RF-AQIA01017096.1-igkv |(35522, 35822)|2.93891739643|(0.970,0.990,0.981)|1
ARCDIQMTQSPSSLSASVGDRVTVTCRASQGINKELSWYQQKPGKAPTLLIYAASSLQTG
VSSRFSGSGSGTDYTLTISSLQPEDVATYYCLQDYNTP
>V49RF-AQIA01017096.1-igkv |(53919, 54221)|2.59252530125|(0.883,0.813,0.922)|1
SSGDIVMTQTPLSLPVTPGEPASISCRSSQSLLHSNGYTYLYWYLQKPGQSPQLLMYFAS
YRASGVPDRFSGSGSGTDFTLEISRVEAEDIGVYNCMQG
>V50RF-AQIA01017097.1-igkv |(8073, 8388)|2.46349127089|(0.980,0.750,0.933)|1
SSGDIVMTQTPLSLPVTPGEPASISCRSSQSLLDSDGYTCLDWYLQKPGQSPQLLIYEVS
NRVSGVPDRFSGSGSGTDFTLKISRVEAEDVGVYYCMQSIEFP
>V51RF-AQIA01017097.1-igkv |(30350, 30668)|1.65018110493|(0.778,0.651,0.519)|1
SSGDIVMTQTPLSLLVTPGEPASVSSCRCSQSLPYRGEKTYLYWYLQKPGQSPQLLIYFV
SNRASRVPDRFRGSGSDTDFTLKISWVETEDVGIYYRMQNIELP
>V52RF-AQIA01017097.1-igkv |(38546, 38864)|2.48687754355|(0.959,0.844,0.815)|1
SSGDIVMTQTPLSLPVTPGEPASISCRSSQSLLDSEDGNTYLDWYLQKPGQSPQPLIYEV
SNRASGVPDRFSGSGSDTDFTLKISRVEAEDVGVYYCMQYTHIP
>V53RF-AQIA01017097.1-igkv |(56327, 56642)|2.1436876399|(0.763,0.627,0.927)|1
TSGDILLTQTPLSLPVTPGEPASISCRSSQSLLHSNGNTYLHCYLQKPGQSPQLLIYEVS
NRASGVPDRFSGSGSDTDFTLKINLVEAEDVGVYSCMQTTQWP
>V54RF-AQIA01017097.1-igkv |(61240, 61555)|2.52635005376|(0.868,0.800,0.877)|1
SSGDIVMTQTPLSLPVTLGEPASISCRSSQSLVYSDGKTYLYWYLQKPGQSPQLLMYLVS
KRASGVPDKFSGSGSGTDFTLKISRVEAEDVGVYYCMQALRSP
>V55RF-AQIA01017097.1-igkv |(64674, 64989)|2.40400748901|(0.914,0.726,0.897)|1
SSGDIVMTQTPLSLPVIPGEPASISCRSSQSLLHSDGYTYLHWYLQKPGQSPQLLIYLGS
NCASGVPDRFSGSGSGTDFTLKISRVEAEDIGIYYRMQNLQIP
>V56RF-AQIA01017097.1-igkv |(69341, 69641)|2.84679662698|(0.913,0.995,0.987)|1
ARCDIQMTQSPSSLSASVGDTVTITCRASQGINNELAWYQQKPGKAPTLLLYSGSSLHTG
VPSQFSGSGSGTDFTLTISSLQPEDVATYYCRQDYNTP
>V57RF-AQIA01017097.1-igkv |(77437, 77752)|2.58650040263|(0.936,0.783,0.959)|1
SSGDIVMTQTPLSLPVTPGEPASISCRSSQSLLDSDGYTHLHWYLQKPGQSPQLLMYLVS
NRASGVPDRFSGSGSGTDFTLKISRVEAEDVGVYYCMQTLQTP
>V58RF-AQIA01017099.1-igkv |(11233, 11548)|2.51253029404|(0.982,0.789,0.904)|1
TSGDIVMTQTPLSLPVTPGEPASISCRSSQSLLHSNGYTYLFWYLQKPGQSPQLLIYLVS
NRASGVPDRFSGSGSGTDFTLKISRVEAEDVGVYYCLQDIQLP
>V59RF-AQIA01017099.1-igkv |(19461, 19761)|2.94672550775|(0.972,0.992,0.985)|1
ARCDIQMTQSPSALSASVGDRVTISCRASQNIYSGLAWYQQKPGKAPKLLIYAASRLQSG
IPSRFSGSGSGTDFTLTISSLQPEDSAAYYCQQVYSNP
>V60RF-AQIA01017100.1-igkv |(7491, 7806)|2.57308042818|(0.980,0.790,0.943)|1
TSGDIVMTQTPLSLPVTPGEPASISCRSSQSLLHSDGYTYLDWYLQKPGQSPQLLIYLGS
KRASGVPDRFSGSGSGTDFTLKISRVEAEDVGVYYCMQGTQLP
>V61RF-AQIA01017105.1-igkv |(1136, 1436)|2.97830822856|(0.998,0.985,0.996)|1
ARCDIQMTQSPSSLSASVGDTVTITCRASQGISNDLAWYQQKPGETPKLLIYEASSLQSG
IPSRFSGSGSGTDFTLTISSLQSEDFATYYCQHYYSTP
>V62RF-AQIA01017109.1-igkv |(27445, 27743)|2.60971916874|(0.997,0.975,0.793)|1
ARCDIQMTQSPSSLSASVGDRVTITCQASQGISNNLAWYQQKPGKVPKLLIYKASTLQSG
VPSRFSGSGSGTDFTLTISSLQPEDFATYYCQHGYGI
>V63RF-AQIA01017115.1-igkv |(12703, 13003)|2.81705802286|(0.993,0.881,0.992)|1
ARCDIQMTQSPSSLSASVGDRVTITCRASENVNNYLHWYQQKPGKAPKLLIYAASTLQSG
VPSRFSGSGSGTDYTLTISSLQSEDVATYYCQHSYGTP
>V64RF-AQIA01017115.1-igkv |(28053, 28368)|2.20926158975|(0.962,0.745,0.788)|1
SSGDIVMTQTPLSLPVTPGEPASISCRSSQSLLHSDGNTYLYWYLQKPGQPPRLLIYRVS
NRFSGVPDRFSGSGSGTDFTLKISRVKAEDVGVYYCMQALQTP
>V65RF-AQIA01017115.1-igkv |(33048, 33363)|2.41839052203|(0.973,0.739,0.916)|1
SSGDIVMTQTPLSLPITPGEPASISCRSSQSLLHSNGNTYFHWYLQKPGQSPQLLIYGGS
NRASGVPDRFSGSGSGTDFTLKISKVEAEDVGVYYCVQAIAFP
>V66RF-AQIA01017115.1-igkv |(51966, 52281)|2.4041429492|(0.967,0.709,0.962)|1
SSGDIVMTQTPLSLPVTPGEPASISCRSSQSLLHSNGNTYLYWYLQKPGQPPRLLIYRVS
NRFSGVPDRFSGSGSGTDFTLKISRVEAEDVGVYYCMQALQTP
>V67RF-AQIA01017115.1-igkv |(73836, 74136)|2.9691523093|(0.996,0.992,0.982)|1
ARCDIQMTQSPSSLSASVGDRVTITCRASQGISNWLAWYQQKPGKAPKLLIYRASNLETG
VPSRFSGSGSGTDFTLTISSLQPEDIATYYCQQHDNSP
>V68RF-AQIA01017115.1-igkv |(81810, 82124)|2.23157051764|(0.968,0.780,0.766)|1
SSGDIVMTQTPLSLPVTPGEPASISCRSSQSLLHSNGNTYLHWYLQKPGQSPRLLIYKVT
NRESGVPDRFSGSGSGTDFTLKISRVEPEDVGVYYCMQSTKDP
>V69RF-AQIA01017139.1-igkv |(30471, 30771)|2.59980001921|(0.864,0.871,0.865)|1
TTGQVILTQSPATLSLSPGERATLSCRASQSVSSYLAWYQQKPGQAPRLLIHSASSRATG
IPDRFSGSGSGTEFTLTISSLEPEDVGVYHCYQYYSGY
>V70RF-AQIA01017139.1-igkv |(39707, 39995)|2.35547550887|(0.747,0.816,0.892)|1
TILTQSAAFVSATPGDKVTISCKASQDIDDDMNWYQQEPGEAPKLIIKDATTLVSGIPPR
FSGSGYGTDFTLTINNVESEDAAYYFCLQHDNFP
>V71RF-AQIA01017140.1-igkv |(859, 1159)|2.85038299634|(0.967,0.937,0.951)|1
AKCDIQMTQSPTFLSASVGDRVTIACRASQSINKGLAWYQQKPGKAPKLLISYASNLYTD
VPSRFSGSGSGTDFTLTISSLQPEDAATYYCFQYNSYP
>V72RF-AQIA01017142.1-igkv |(9949, 10237)|1.7939231153|(0.616,0.559,0.888)|1
TILTQSPAFVSATPGDKVTISCRAGQDIDDDMNWYQQEPGEAPKLIIKDATTLVSGIPPQ
FSGSGYGIDFTLTINSMKSEDTAYYFCQQRDNTP
>V73RF-AQIA01017150.1-igkv |(11178, 11496)|2.67765803168|(0.976,0.843,0.934)|1
ACGDIVMTQSPDSLAVSLGERVTINCKSSQSLLYSSNNKNYLAWYQQKPGQAPKLLIYWA
STRESGVPNRFSGSGSGTDFTLTISGLQAEDVAVYYCQQYYSTP
>V74RF-AQIA01046502.1-trgv |(39505, 39815)|1.85530522101|(0.889,0.664,0.666)|1
SQKSSNLEGKTKSITGPTGSPAEITCDLPGVSTLYIHWYLHQEGKAPQRLLYYEPYYFTV
VLESGISPGKYDTASTRKSWNLRLQNLIENDSGVYYCATWD
>V75RF-AQIA01046502.1-trgv |(44235, 44548)|2.52079054371|(0.923,0.852,0.813)|1
SQKSSNLEGRTKSVTRPTGSSAEITCDLPEVSSFYIHWYLHQEGKAPQRLLYYDSSNSRV
VLESGISPGKYDTYGSTRSNLRLILRNLIENDSGVYYCANWD
>V76RF-AQIA01046502.1-trgv |(48629, 48942)|2.36723203636|(0.915,0.715,0.888)|1
GQKSSNLEGITKSVTRPTGSSAEITCDFSGDSNFYIHWYLHQEGKVPQRLLYYDVSNSRD
VLESGLSPGKYYTHTRTRWSWILILRNLIENDSGVYYCANWD
>V77RF-AQIA01046502.1-trgv |(58146, 58459)|2.30507206634|(0.896,0.765,0.771)|1
SQKSSNLEGRTKSVTRPTGSSAEITCDLPEVSSFYIHWYLHQVGKAPQRLLYYDTSNSRV
VLESGISPGKYDSYGSTRNNLRLRLRNLIENDSGVYYCANWD
>V78RF-AQIA01048525.1-trbv |(36418, 36709)|2.31779518103|(0.833,0.734,0.795)|1
PEVTQTPSHQVTQMGQEVILRCVPIPNHLNFYWYRQILGQKVEFLVIFFDNNISEKSEIF
EDRFSVGRPDGSNFTLKIKSTKLEDSAMYFCASSE
>V79RF-AQIA01048525.1-trbv |(43379, 43676)|2.25041962653|(0.882,0.880,0.663)|1
SLDTAVSQTPKYLVTQTGKNEYLKCEQNLGHDTMYWYKQDSKKLLKIMFSYNNKQLIINE
TVPNRISPDSPDKAHLNLHIKSLELGDSAVYFCASSQ
>V80RF-AQIA01048525.1-trbv |(48020, 48317)|2.70843192639|(0.928,0.956,0.851)|1
PIDSGVTQTPKHLVMGMTNKKSLKCEQHMGHRAVYWYKQKVKKPPEIMFMYNYEKLSINE
SVPSRFSPECSQSSLFYLHLRALQPEDSALYLCASSQ
>V81RF-AQIA01048525.1-trbv |(56253, 56551)|2.49363661795|(0.865,0.901,0.769)|1
TQTPSHQVTQMGQEVILRCVPISNHFYFYWYRQILGQKVEFLVSFYNGKISEQSEIFEDQ
FSVGRSDGVHFTLKIKSTKLEDSAMYFCASSEATALQ
>V82RF-AQIA01048525.1-trbv |(63825, 64138)|2.33643487763|(0.901,0.859,0.714)|1
SLDTAVSQTPKYLVTQTGKEESLKCEQNLGHDTMYWYKQDSKKLLKIMFSYNNKKLFINE
TVSNRFSPDSPDKARLILHIKPLELGDSAVYFCASSQGTALQ
>V83RF-AQIA01048525.1-trbv |(72343, 72634)|2.45047382391|(0.877,0.854,0.768)|1
PEVTQTPSHQVTRMGQEVILRCVPIPNHLYFYWYRQILGQKVEFLVYFYNGEISEKSEIF
EDRFSVGRSDGVHFTLKIKSTKLEDSATYFCASSE
>V84RF-AQIA01048525.1-trbv |(78854, 79151)|2.59394712206|(0.892,0.874,0.840)|1
PLDTAVFQTPKYLVTQMGKKESLKCEQNLGHDTMYWYKQDSKKLLKIMFIYSNKEPILNE
TVPNRFSPESLDKAHLNLHIKSVELGDSAVYFCASSQ
>V85RF-AQIA01048525.1-trbv |(83218, 83515)|2.43260585713|(0.908,0.813,0.796)|1
PTDTGVTQTPKHLVMEMTNKKSLKCEQHMGHNAMYWYKQKAKKPPELMFVYQYEKLSINE
SVPSRFSPECSKSSLLYLHLRALQPEDSALYLCASSQ
>V86RF-AQIA01048525.1-trbv |(94178, 94494)|2.63499766363|(0.933,0.876,0.860)|1
PVEAGVTQTPRSLIKMRGQQATLSCSPISGHRSVYWYQQTPGQGLQFLFEYFSETQRQKG
NFSNRFSGRQFSNSRSEMNVSTLELGDSALYLCASSLAQPYKA
>V87RF-AQIA01048526.1-trbv |(5857, 6154)|2.80375527321|(0.929,0.915,0.966)|1
PANADVTQSPKFQILKTGQSMTLQCAQDMNHNSMYWYRQDPGMGLRLIHYSATEDTTDPG
EVPDGYSVSRLNKKEFLLRLESAALSQTSVYFCASSE
>V88RF-AQIA01048526.1-trbv |(20529, 20842)|2.24143171835|(0.879,0.870,0.663)|1
SLDTAVSQTPKYLVRQTGKNESLKCEQNLGHNAMYWYKQDSKKLLKIMFIYNNKEPILNE
TVPYRFSPKSPDKAHLNLHIKSLELGDSAVYFCASSQDTALQ
>V89RF-AQIA01048526.1-trbv |(23960, 24257)|2.36130267187|(0.830,0.868,0.718)|1
PMETGVTQTPRHLVMGMTNKKSLKCEQHLGHNAMYWYKQKAKKPPELMFIYNFKERAENN
SVPSRFSPECPDSSHLHLHLRALQPEDSALYLCASSQ
>V90RF-AQIA01048526.1-trbv |(35703, 36000)|2.71437468773|(0.912,0.957,0.863)|1
PVNAGVTQTPKFQVLKTGQNMTLKCAQDMNHDRMYWYRQDPGMGLRLIHYSAGEGSTEKG
EVPNGYNASRLNKKDFLLRLESAAPSQTSMYFCASSE
>V91RF-AQIA01048527.1-trbv |(3129, 3429)|2.54930576921|(0.928,0.853,0.829)|1
HTGAGVSQSPRNKVTEEGKDVVLRCDPISGHTALYWYRQSLGKGLEFLIYFQGNDAPDKS
GLPSGRFSAERTEGSVSTLKIQRTEQGDSAVYLCASSL
>V92RF-AQIA01048527.1-trbv |(25700, 26000)|2.50431013128|(0.921,0.924,0.759)|1
HTGAGVSQSPSNKVTEKGKDVELRCDPISGHAVLYWYRQNLGQGLEFLIYFQGTGAVDDS
GLRSDRVSATRPEGSVSTLKIQHTEQGDSAMYFCASSL
>V93RF-AQIA01048528.1-trbv |(4386, 4682)|2.34289490647|(0.905,0.808,0.754)|1
SVDTGVTQSPTHLIKTRGQQVTLRCSPISGHNTVSWYQQAPGQGPQFIFEYANELRTSEG
NFPHRFSGRQFRDYHSEMNVSALELGDSALYLCASSL
>V94RF-AQIA01048528.1-trbv |(7069, 7365)|2.63485507227|(0.903,0.880,0.861)|1
SVDCGVTQTPKHLITAIGQQVTLRCSPRSGDRSVYWYQQSLGQGLQFLIQYYNGEERAKG
NILERFSAQQFADLHSELNLSSLELGDSALYFCASSE
>V95RF-AQIA01048529.1-trbv |(2063, 2360)|1.88858285962|(0.865,0.509,0.928)|1
HRDAEITQSPRHKITETGRKVTLTCHQTWNHNNMFWYRQDLGHGLRLIHYSYGVPDTNKG
EVPDGYSVSRSNKEDFPLTLESAASSQTSVYFCASSE
>V96RF-AQIA01048530.1-trbv |(6133, 6424)|2.44375055694|(0.900,0.944,0.724)|1
AGVAQSPRYKITGKSQTVTFWCDPISGHATLYWYRQILGQGPELLVQFQNKGVVDDSQLP
KDRFSAERLKGVDSTLKIQPAELGDSAVYLCASSL
>V97RF-AQIA01048530.1-trbv |(18692, 18989)|2.26619980172|(0.759,0.699,0.913)|1
HRDAGITQSPRYKVTETGRQVTLTCHQTWSHSYMFWYRQDLGHGLRLIHYSAGAGITDKG
EVPDGYVVSRSKTEDFLLTLESATRSQTSVRFCASSE
>V98RF-AQIA01048530.1-trbv |(27859, 28150)|2.38876226696|(0.907,0.889,0.722)|1
AGVAQSPRYKVIEKSQAVTFWCNPISGHATLYWYRQILGQGPELLVQFRNNDVVDDSQLP
KDRFSAERLKGVNSTLKIQPAELGDSAVYLCASSL
>V99RF-AQIA01048530.1-trbv |(44934, 45231)|2.79164253497|(0.980,0.978,0.876)|1
PVNAGVTQTPKFQVLKTGQSMTLQCAQDMNHDYMYWYRQDPGMGLRLIHYSVGEGSTEKG
EVPDGYNVTRSNTEDFPLRLESAAPSQTSVYFCASSD
>V100RF-AQIA01048530.1-trbv |(49166, 49466)|2.6765028039|(0.909,0.842,0.950)|1
HTGAGVSQSPRYKVTKRGQDVALRCDPISGHDYLYWYQQALGQGPAFLTYFQDDAQRDKS
GLPNDRFSAERTEGSVSTLKIQRTEQGDSAVYLCASSL
>V101RF-AQIA01048530.1-trbv |(57090, 57380)|2.29012457734|(0.918,0.814,0.731)|1
QAGVTQSPTHLIKTRGQQVTLRCSPISGHTNVYWYQQALGQGPQFILWYDEEEERDRGTF
PHRFSGHQFPNYSSELNVNALEVEDSALYLCASSL
>V102RF-AQIA01048530.1-trbv |(68536, 68827)|2.79137530735|(0.938,0.896,0.968)|1
AGVSQSPRYKVTKRGQDVALRCDPISGHVALYWYRRTLGQGPELLTYFQNDAQPDKSGLP
SDRFSAERTEGSVSTLKIQRTEQGDSAVYLCASSL
>V103RF-AQIA01048530.1-trbv |(82295, 82592)|2.68945359449|(0.905,0.955,0.851)|1
LVNVGVTQTPKFQVLKTGQSMTVQCAQDMNHNFMYWYRQDPGMGLRLIHYSGAAGTTDKG
EVPSGYNVSRLNTEDFPLRLESADPSQTSVYICASSY
>V104RF-AQIA01048530.1-trbv |(86912, 87212)|2.72561393505|(0.930,0.879,0.927)|1
HTVARVSQSPRYKVTKRGQDVALRCDPISGHATLYWYQQALGQGPELLTYFSYEAQQDKS
GLPSDRFSAERPEGSVSTLKIQRTQQGDSAVYLCASSL
>V105RF-AQIA01048530.1-trbv |(109105, 109405)|2.71436530313|(0.938,0.901,0.890)|1
HTGAGVSQSPRYKVTERGQDVALRCDPISGHDYLYWYQQALGQGPELLTYFNYKAQPDKS
GLPNDRFSAERPEGSVSTLKIQRTEQRDSAVYLCASSL
>V106RF-AQIA01048530.1-trbv |(114175, 114471)|2.56414349385|(0.931,0.840,0.851)|1
PVDAGVTQSPTHLIKTRGQQVTLRCSPISGHTSVSWYQQALGQGPQLIFEYDRKEERVRG
NFPDRFSGRQFPNYSSELNVNASEMGDSALYLCASSL
>V107RF-AQIA01048530.1-trbv |(120217, 120514)|2.50235688246|(0.848,0.803,0.860)|1
PGNAGVNQTPKFQVLKTGQSMTLQCAQDMNHECMSWYRQDPGMGLRLIHYSVGAGITDKG
EVPNGYNVSRSNTEDFPLRLESAASSQTSVYFCGSSD
>V108RF-AQIA01048531.1-trbv |(13036, 13336)|2.50453953306|(0.947,0.743,0.970)|1
HTGAGVSQFPRYRVTKRGQDVTLRCDPISGHEYLYWYQQAPGQGPEFLTYFQNDAQPDKS
GLPNDRFSAERTEGSVSTLKIQRTEQGDSAVYLCASSL
>V109RF-AQIA01048531.1-trbv |(21500, 21796)|2.3650523838|(0.925,0.776,0.805)|1
PVDTGVTQSPTHLIKTRGQQVTLRCSPISGHSSVSWYQQALGQGPQFIFEYYEKEERERG
NFPGRFSGHQFPNYSSELNVSALLLGDSALYLCASSL
>V110RF-AQIA01048531.1-trbv |(28938, 29231)|1.95120191092|(0.773,0.945,0.540)|1
PGNADVTQTPKFQVLKTGQSMTVQCAQDMNHDCMYWYRQDPGMGLKLIHYSVGAGITDKG
EVPNGYNVSRLNTEDFPLRLESAALSQTSVYSVPAV
>V111RF-AQIA01048532.1-trbv |(3516, 3812)|2.75773258026|(0.968,0.885,0.936)|1
PVDAGVTQSPTHLIKTRGQQVTLRCSPISGHTSVYWYQQALGQGPQFIFQYYEKEERERG
NFPDRFSGHQFPNYSSELNVSALLLGDSALYLCASSL
>V112RF-AQIA01048532.1-trbv |(10804, 11101)|2.64613177862|(0.840,0.957,0.948)|1
PVNAGVTQTPKFQVLKTGQSMIVQCAQDMKHDYMFWYRQDPGMGLRLIYYSVTAGITTKG
EVPNGYNVSRKNTEDFLLRLESADPSQTSVYICASSE
>V113RF-AQIA01048532.1-trbv |(15109, 15409)|2.76768632674|(0.905,0.931,0.939)|1
HTGAGVSQSPRYKVIKKGQDVALRCDPISGHAALYWYQQALGQGPEFLTYFNYKAQPDKS
GLPNDRFSAERPEGSVSTLTIQRTEQQDSAVYLCASSL
>V114RF-AQIA01048532.1-trbv |(34644, 34944)|2.59891847018|(0.882,0.843,0.880)|1
HADAGVSQDPRHKITKTGQNVSFKCVPISEHNRLYWYRQTLGQGPEFLTYFQNEAQQDRS
GLFSDRFSAERPEGSISTLMIQHTEQGDSAVYLCASSL
>V115RF-AQIA01048532.1-trbv |(41461, 41758)|1.90930151744|(0.830,0.517,0.915)|1
SVAAGVIQSPRHLIKEKRETATLQCYPLPEHDTVYWYQQGPGQGPQFLISFYQKMQREKG
SIPDRFSAQQFSDYHSELNMSSLELGDSAVYLCASSL
>V116RF-AQIA01048532.1-trbv |(48704, 49001)|2.78745609036|(0.928,0.938,0.922)|1
HMDAGITQSPRHKITETGTPVTLRCHQTENHRYMYWYRQDLGNGLRLIHYSYGVEDTDKV
EVSDGYSVSRSKTEDFLLTLESAPRSQTSVYFCASSE
>V117RF-AQIA01048532.1-trbv |(59753, 60044)|2.1147172738|(0.929,0.712,0.757)|1
AGVTQSPRYKITEKKQPVAFWCNPISGHNTLYWYRQNLGQGPELLVQYENEEAVDDSQLP
KDRFSAERLKGIDSTLRIQPAELGDSAVYLCASSL
>V118RF-AQIA01048532.1-trbv |(65345, 65645)|2.34378393356|(0.886,0.805,0.750)|1
HTDAGVIQSPRHEVTEMGKEVTLRCEPISGHSSLFWYRQTMMRGLEFLIYFNNKSPIDDS
GMPKDRFSATMPDASFSTLKIQPSEPRDSAVYFCASSL
>V119RF-AQIA01048532.1-trbv |(68613, 68913)|2.36704931476|(0.901,0.841,0.739)|1
HTDAGVIQSPRHEVTEMGKEVTLRCEPISGHTYLFWYRQTMMRGLEFLIYFNNKSPIDDS
GMPKDRFSAKMPDASFSTLKIQPSEPRDSAVYFCASSL
>V120RF-AQIA01048532.1-trbv |(83967, 84267)|2.14719420427|(0.827,0.958,0.606)|1
LIDAGVTQTPRHKVTEMGQEVTMRCQPILGHNTVFWYRQTVMQGLELLVYLRNKASLDDS
GMPKDRFSAEMPDASLATLKIQPSEPRDSAVYLCASGL
>V121RF-AQIA01048532.1-trbv |(91012, 91313)|2.56639687898|(0.905,0.885,0.812)|1
AGVTQFPSHRVIEKGQAVTLRCDPISGHDYLYWYRRVMGKEIKFLIYFLRAYTQDESGMP
NKRFSAERTGGTYSTLKVQPAELEDSGVYFCASSQDTV
>V122RF-AQIA01048533.1-trbv |(4086, 4383)|1.69668082807|(0.874,0.671,0.586)|1
HGDVMVIQNPRYQVTQLEKPVTLSCSQNLNHQVMYWYQQKPSQAPKLLFHYYDKDFNNEA
DTPDNFQSRRPNTSFCFLDIRSPGLEDAAVYLCASSK
>V123RF-AQIA01048535.1-trbv |(1472, 1772)|1.9505091047|(0.753,0.545,0.844)|1
SPGEEVTQTPKHLVKGEGQKAKLYCAPIKGYSYFFWYQWVLKKEFKFLISFQNENVFDET
GMPKERFSAKCPPNSPCSLEIQATKLKDSAAYFCASSQ
>V124RF-AQIA01048536.1-trbv |(12317, 12613)|2.00527027831|(0.827,0.719,0.638)|1
LSNAGITQNPRHLVRRRGQEARLRCSPMKGHSHVYWYRQLPEEGLKFMVYLQKEKIIDES
GMPKEWFSAEFPKEGPSILRIQQAEQEDSAAYFCASS
>V125RF-AQIA01048536.1-trbv |(15427, 15724)|2.73747343601|(0.891,0.928,0.930)|1
TMDGRITQSPKYLFRKEGQNVTLSCEQNLNHDAMYWYRQDPGQGLRLIYYSQIVNDIQKG
DIAEGYSVSRERKESFPLTVTSAQRNPTAFYLCASSI
>V126RF-AQIA01048536.1-trbv |(33459, 33759)|2.27551566861|(0.906,0.730,0.800)|1
STDTKVTQRPRLLVKANKQKAKMDCVPVKGHSYVYWYRKKLDEELKFLVYFQNEEIIQKA
EIINKRFSAQCPQNSSCTLEIQSTESGDAALYFCASSK
>V127RF-AQIA01048536.1-trbv |(42435, 42735)|2.26731263243|(0.873,0.804,0.710)|1
SFHAEVTQTPGYLVKGKGQKTKMDCTPEKGHTYVYWYQQNQNKEFTFLISFQNEQVLQET
ELHKKRFSSQCPKNLPCSLEIPSSEPGDTALYLCASSQ
>V128RF-AQIA01048536.1-trbv |(54577, 54875)|2.68893938112|(0.904,0.937,0.860)|1
SMDADVTQTPRNKIAKTGKRIMLECSQTKGHDQMYWYRQDPGLGLRLIYYSFDVQDINKG
EISNGYSVSRQEQAKFSLSLESATPNQTALYFCATSD
>V129RF-AQIA01048536.1-trbv |(62410, 62707)|2.59926930513|(0.847,0.941,0.846)|1
LTEADIYQNPRHRVIGTGKKITLECSQTVGHDKMYWYQQDPGMELHLIHYSYGVNSTERG
DFSSESTVSRLRIEHFPLTLESASPSHTSQYLCASSE
>V130RF-AQIA01048536.1-trbv |(103279, 103576)|2.0203075041|(0.776,0.925,0.566)|1
PLEAQVTQNPRYLITVTGKKLTVTCSQNMNHEYMSWYRQDPGLGLRQIYYSVNVEMVDKG
DIPEGYNVSRKEKRNFPLILESPSPSQTSLYLCASSL
>V131RF-AQIA01048536.1-trbv |(108616, 108923)|2.64130075255|(0.880,0.867,0.896)|1
LVDVKVTQSSRYLIKRTGEKVFLECVQDMDHERMFWYRQDPGLGLRLIYFSYDVKLNEKG
DIPEGYSVSREKKERFSLILGSASTNQTSMYLCASSLSTA
>V132RF-AQIA01048536.1-trbv |(128401, 128704)|2.53724504898|(0.873,0.781,0.929)|1
SVFSAVVSQKPSRDVCQRGTSVTIQCQVDSQVTMMFWYRQQPGQSMTLIATANQGSEATY
ESGFVIDKFPISRPNLTFSTLTVSNTSPEDSSIYLCSVE
>V133RF-AQIA01058132.1-igkv |(2776, 3091)|2.28778481074|(0.955,0.736,0.831)|1
TSGDIVMTQTPLSLPVTPGEPASISCRSSQSLLHSGGKTYLYWYLQKPGQSPQLLIHEVS
NRASGVPDRFSGSGSGTDFTLKISRVEAEDVGVYYCMQGIQLP
>V134RF-AQIA01058133.1-igkv |(2029, 2329)|2.97830822856|(0.998,0.985,0.996)|1
ARCDIQMTQSPSSLSASVGDTVTITCRASQGISNDLAWYQQKPGETPKLLIYEASSLQSG
IPSRFSGSGSGTDFTLTISSLQSEDFATYYCQHYYSTP
>V135RF-AQIA01064136.1-trav |(11390, 11693)|2.26546650874|(0.816,0.754,0.736)|1
MCLILVTTGQNIDQPTEMTAMEGVIVQINCTYQTSGFNGLSWYQQHDGEAPTLLSYNVLD
GLEEKGRFSSFLSNSKRYSYLLLKELQMKDSASYLCAVR
>V136RF-AQIA01064137.1-trav |(6334, 6650)|2.26828213268|(0.842,0.680,0.846)|1
QLVTQPEDQVTVAEGNPLTVKCTYSVSGNPYLFWYVQCPNQGLQFLLKYITGDNLVKGSY
GFEAEFNKSQTSFHLKKPSALVSDSALYFCAVRDTLIGAAGGA
>V137RF-AQIA01064137.1-trav |(37156, 37446)|2.64168718425|(0.866,0.864,0.926)|1
MSRGEDVEQSLFLSVREGDISVINCTYTDSSSTYLYWYKQEPGAGLQLLTYILSNTDLKQ
DQRLTVLLNKKDKHLSLCIADTQTEDSAIYFCAES
>V138RF-AQIA01064137.1-trav |(47073, 47361)|2.05872811927|(0.861,0.776,0.635)|1
VKSQKIEQNSEALNIQEGKTATLTCNYTNYSPSYLQWYRQDPGRGPVFLLLIRENEKEKW
KERLKVTFDTTLKQSLFHITASQPADSATYLCAL
>V139RF-AQIA01064138.1-trav |(6177, 6471)|2.80483034719|(0.972,0.991,0.878)|1
GINGDSVVQTEGQVLLSEGDSLIVNCSYESTQYPSLFWYVQYPGEGLQLLLKAMKFNDKE
SNKGFEATYRKETTSFHLEKDSVQESDSAVYFCALS
>V140RF-AQIA01064138.1-trav |(19410, 19703)|2.52353655292|(0.811,0.842,0.966)|1
GSGKNQVEQSPQSLIILEGKNCTLQCNYTVSPFSNLRWYKQDTGKGPISLTIMTFSENTK
SNGRYTATLDADTKQSSLHITAAQLSDSASYICVVS
>V141RF-AQIA01064144.1-trav |(2574, 2880)|2.38524037236|(0.907,0.733,0.866)|1
VWSQQKEVEQDPGPFSVPEGATVTFNCTYSNSASQSFFWYRQDSRKEPKLLMSVYSSGNE
DGRFTAQLNRASQYISLLIRDSQLSDSATYLCAVRTQCSP
>V142RF-AQIA01064144.1-trav |(8015, 8312)|2.29388623971|(0.957,0.759,0.808)|1
GTRAQSVTQLDSQVSVSEGVPVLLRCNYSSSFSPYLFWYVQYPNQGLQLLLKYTSGTTLV
KGINGFEAEFKKSETSFHLTKASAHVSDAAEYFCAVN
>V143RF-AQIA01064146.1-trav |(4210, 4500)|2.83384066792|(0.939,0.940,0.956)|1
VNGENVEQHPSTLSVQEGDSSVIKCTYSDSASNYFPWYKQELGKGPQFIIDIRSNAHEKK
NQRITVLLNKTAKHFSLHITETQPGDSAVYFCAAS
>V144RF-AQIA01064146.1-trav |(26731, 27019)|2.75624910116|(0.893,0.920,0.969)|1
VWSQQKVEQNSGPLNVPEGAIASLNCTYSDSGSQSFFWYRQYSGQSPELLMSTYSSGDKE
DGRFTAQLDRASQYVSLLIRDSQLSDSATYLCAV
>V145RF-AQIA01064146.1-trav |(33220, 33517)|2.16440280106|(0.944,0.754,0.746)|1
GTRAQSVTQLDSQVSVSEGVPVLLRCNYSSSFSPNLFWYVQYPNQGLQLLLKYISGTTLV
KGINGFEAEFKKSETSFHLTKASAHVSDAAEYFCAVS
>V146RF-AQIA01064146.1-trav |(38786, 39083)|2.36621557639|(0.914,0.851,0.736)|1
TARAQSVTQPDIHITVSEGASLELRCNYSYGATPSLFWYVQSPGQGLQLLLKYFSGDTVV
QGIKGFEAEFKRSQYSFNLRKPSVHWSDAAEYFCAAG
>V147RF-AQIA01064146.1-trav |(52629, 52922)|2.48924553967|(0.935,0.930,0.751)|1
VSRGESVGLHLPTVTVQEGDNSVINCTYSDSASDYFLWYKQESGKGPQSIMDIRSNMAKR
QGQRLTVLLNKTMKHLSLQIAATEPGDSAVYFCAEN
>V148RF-AQIA01064146.1-trav |(58513, 58814)|2.52309867205|(0.929,0.805,0.865)|1
SGIAQKITQTQPAMFVQEKEAVTLDCTYDTSDQNYGLFWYKQPSSGEMIFLILQMSYDKQ
NATEGRYSLNFQKARKSVNLVISASQVGDSATYFCAMR
>V149RF-AQIA01064146.1-trav |(76833, 77127)|2.67945762027|(0.929,0.881,0.886)|1
RTRGDSVTQMEGPVTLSERAFLTINCTYTATGYPSLFWYVQYPGEGPQLLLKAAKTDEKG
SNKGFEATYRKETTSFHLKKDSVQESDSAVYFCALS
>V150RF-AQIA01064146.1-trav |(101455, 101748)|2.72495715951|(0.910,0.883,0.938)|1
VWSQQKEVEQNPGPLSVPEGATASLNCTYSNSAFQYFMWYRQYSRKGPQLLIYIYSSGNK
EDGRFTAQVDKSSKYISLFIRDSQPSDSATYFCAMS
>V151RF-AQIA01064146.1-trav |(114433, 114733)|1.79779933545|(0.883,0.688,0.616)|1
GTRAQSVTQLDSQVPVFEEAPVLLRCNYSSSSVSVYLFWYVQYPNQGLRLLLKYLSGPTL
VKGINGFEAEFKKSETSFHLRKPSAHISDTAEYFCAVS
>V152RF-AQIA01064148.1-trav |(820, 1135)|1.90352342851|(0.783,0.519,0.948)|1
GTRAQSVTQPEKLLSVFKGAPVELKCYYSYSGSPNLFWYVQYPKQRLQLLLRHISRESIK
GFTADLNKSDTSFHLKKLFAQEEDSATYYCALSGTVAGFARKQ
>V153RF-AQIA01064148.1-trav |(10272, 10559)|2.75225105395|(0.935,0.947,0.882)|1
VNSQQGEEDPQALSIQEGENATMNCSYKTSINNLQWYRQDSGRSLVQLVLIRSNEREKNS
GRLRVTLDTSKKSSSLLITASRAADTASYFCATD
>V154RF-AQIA01064149.1-trav |(7521, 7843)|2.63387824967|(0.845,0.913,0.912)|1
RTNGDSVTQTEGPVTLPERAALTLNCTYQTSYSAFIFWYVQYPNKEPELLLKSSENQETN
SRGFQASHVKSDSSFHLEKPSVQLSDSAVYYCVLRDTVGGTAARA
>V155RF-AQIA01064149.1-trav |(10740, 11043)|2.36652587719|(0.812,0.793,0.770)|1
SSMAQKVTQAQTEISVVEKEDVTLDCVYETRDTTYYLFWYKQPPSGELVFLVRQNSFDEQ
NEINGRYYSNFQKSTSSFNLTITASQVVDSAVYFCALNE
>V156RF-AQIA01064151.1-trav |(18011, 18298)|2.35637660629|(0.909,0.842,0.736)|1
LSGEDQVTQSPEALSLQEGESSSLNCSYTVSGLRGLFWYRQDPGKGPEFLFSLYSAGEEK
EKERLKATLTKKESFLHITGPKPEDSATYLCAVQ
>V157RF-AQIA01064151.1-trav |(28358, 28657)|2.06155350533|(0.797,0.578,0.918)|1
VSSKQEVTQIPAALSVPEGDNLVLNCSFTDSAIYNLQWFRQDPGKGLTSLLLIQSSQREQ
TSGRLNASLDKSSGRSTLYITASQPSDSATYLCAVRHS
>V158RF-AQIA01064156.1-trav |(10499, 10796)|2.03657749259|(0.753,0.586,0.822)|1
VIGIQVEQSPPDLILQEGANSTLRCNYSATANNLQWFHQNPWGQLINLFYIPSGTKQNGR
LSATTVTKERYSFLHISSSQTTDSGIYFCAVESQCSP
>V159RF-AQIA01064156.1-trav |(24961, 25273)|2.06532186356|(0.828,0.609,0.805)|1
VSGQQKEESDRQQVKQSPQSLIVQKGGISIINCAYENSAFDYFPWYRQFPGKGPALLIAI
SSAASEKEEGRFKIFFNKSAKNFSLHIMDSQPGDSATYFCAA
>V160RF-AQIA01064159.1-trav |(7752, 8051)|2.26974362851|(0.845,0.795,0.710)|1
VNGQQIMQIPQYQHVQEGEDFTTYCNSSTTLNNIQWYKQRPGGHPVFLITLVKSGEVKKQ
KRLIFQFGEAKKNSSLHITATQTTDVGTYFCAGHSAPQ
>V161RF-AQIA01064159.1-trav |(18642, 18932)|2.21340423079|(0.788,0.656,0.854)|1
TIIDAKTTQPTSMDCAEGRAANLPCNHSTISGSEYIHWYRQIHSQGPQYVIHGLKNNETN
AMASLIITEDRKSSTLILPHATLRDTAVYYCIVRV
>V162RF-AQIA01064165.1-trav |(2107, 2407)|1.83109071232|(0.753,0.506,0.796)|1
FSVAQKVTQAQSSVSMPVGKAVTLNCQYETSSWSYDLFWYKQLPGKEMIFLIRQGSSEQN
ARNGRYSVNFKKEASSIALTISALQLEDSATYFCALRE
>V163RF-AQIA01064165.1-trav |(18360, 18659)|2.44933647734|(0.856,0.811,0.802)|1
VNGQQIMQIPQYQHVQEGEDFTTYCNSSTTLSNIQWYKQRPGGHPVFLIMLVKSGEVKKQ
KRLTFQSGEAKKNSSLHITATQTTDVGTYFCAGHSAPQ
>V164RF-AQIA01064166.1-trav |(7811, 8116)|1.53374667789|(0.765,0.524,0.580)|1
TIIDAKTTQPTSMDCAEGRAANLPCNHSTISANTISANEYIHWYRQFHSQGPQYVIHGLK
NNETNAMASLIITEDRKSSTLILPHATLRDTAVYYCIVRV
>V165RF-AQIA01064166.1-trav |(47951, 48275)|2.13634502382|(0.694,0.773,0.694)|1
VNSQQKNDDQQVKQKPPSLSVQEGGISILNCDYTNSMFDYFVWYKKYPAEGPTFLISIRS
VKDKNEEGRFTVFLNKSAKHLSLHIGASQPGDSAVYLCAASAQCSP
>V166RF-AQIA01064166.1-trav |(53434, 53721)|2.34353005449|(0.786,0.737,0.843)|1
VRSQQPVQSPQAVILQEGEDAIINCNSSKALYSVLWYRQKHGEAPIFLMILLKGGEQKSH
DKIVATFNEKKQQSSLYLMASQLSYSGTYFCGAE
>V167RF-AQIA01064166.1-trav |(81458, 81745)|2.27474929541|(0.725,0.779,0.909)|1
VTSQELEQSPQSLIVQEGKNLTINCTSSKTLYGLHWYKQKYGEGLIFLMMLQQGGEEKSH
EKITAKLDEKKQQSFLHITASQPSHAGIYLCGGD
>V168RF-AQIA01064166.1-trav |(99136, 99426)|2.16173066704|(0.724,0.664,0.844)|1
VSSEDKVMQNPLSLVVHEGDTVTLNCSYEVVNFRSLLWYKQEKKAPIFLFTLTSSGIEKK
SGRLSSILDKKDLFSILNITATQTRDSAVYLCAVE
>V169RF-AQIA01064166.1-trdv |(135908, 136209)|2.1955186103|(0.700,0.736,0.833)|1
SGMAQTVTQSQQEMSVQEAETVILSCTYDTSESNYYLFWYKQPPSRQMILIIRQEAYKQQ
NATENRFSVNFQKAAKSFSLKISDSQLGDAAMYFCAFM
>V170RF-AQIA01064166.1-trav |(145378, 145702)|2.66384294958|(0.912,0.868,0.893)|1
LSLLFPTESGMAQTVTQSQPEMSVQEAETVTLSCTYDTSDSDYYLFWYKQPPSRQMILII
RQEAYKQQNATENRFSVNFQKATKSFSLKISDSQLGDAAMYFCAYR
>V171RF-AQIA01064166.1-trav |(168980, 169268)|2.49662047425|(0.819,0.800,0.916)|1
LSGELKVGQNPLFLSTQEGKNYTIYCNYSTASDRLYWYRQDPGKSLESLFVLLSNGAVKQ
EGRLMASLDTKARLSSLHITAALQDLSATYFCAV
>V172RF-AQIA01075814.1-ighv |(1456, 1765)|2.97420030738|(0.997,0.995,0.983)|1
VLSQVQLQESGPGLVKPSETLSLTCAVSGGSISGYYWNWIRQPPGKGLEWIGYIGGSSGS
TYYNPSLKSRVTISTDTSKNQFSLKLSSVTAADTAVYYCAR
>V173RF-AQIA01075814.1-ighv |(38413, 38722)|2.71795812243|(0.990,0.873,0.925)|1
AHSQVQLVQSGAEVKKPGSSVKVSCKASGYTFTDYYMHWVRQAPGQGLEWMGEINPKTGG
TNYAQKFQGRVTMTRDTSTSTAYMELSSLRSEDTAVYYCAR
>V174RF-AQIA01075814.1-ighv |(41318, 41631)|2.96694028297|(0.997,0.985,0.986)|1
VQCEVQLVESGGGLVQPGGSLRLSCAASGFTFGDYGMSWVRQAPGKGLEWVGRIRNKANS
YTTEYAASVKGRFTISRDDSKNTLYLQMSSLKTEDTAVYYCT
>V175RF-AQIA01075814.1-ighv |(48089, 48398)|2.9614447479|(0.990,1.000,0.973)|1
VQCEVQLVESGGGLVQPGGSLRLSCAASGFTFSSYDMSWVRQAPGKGLEWVSFISNTGKT
IYYADSVKGRFTISRDNAKNSLSLQMSSLRAEDTAVYYCTR
>V176RF-AQIA01075815.1-ighv |(2731, 3045)|2.26775834258|(0.873,0.647,0.968)|1
VLSQVTLKESGPALVKPTQTLTLTCTFSGFSLSTSGMGVGWIRQPSRKTLEWLAHIYWDD
DKRYSTSLKSRLTISKDTSKNQVVLTMTNMDPVDTATYYCARR
>V177RF-AQIA01075818.1-ighv |(5347, 5656)|2.36450309321|(0.858,0.714,0.873)|1
VLSQVQLQESGPGLVKPSETLPLTCTVSGASISSNYWSWIRQPPGKGLEWIGRIYGSGGS
TDYNPSLKSRVTISIDTSKNQFSLKLSSVTAADTAVYYCAR
>V178RF-AQIA01075820.1-ighv |(24543, 24849)|2.83156595086|(0.927,0.938,0.977)|1
VQCVEQLVESGGGLVQPGASLRLSCAASEFTFSSYDMHWVRQAPGKGLEWVSAISIGGGT
YYPDSVKGRFTISRDNAKNSLYLQMNSLRAEDTAVYYCAR
>V179RF-AQIA01075821.1-ighv |(6780, 7092)|2.37596730814|(0.968,0.963,0.698)|1
VLSQVQLQESGPGLVKPSETLSLTCAVSGGSISSGYYWGWIRQPPGKGLEWIGSIYGSGG
SNYLNPSLKSRVTLSVDTSKNQFSLKLSSVTAADTAVYYCAR
>V180RF-AQIA01075823.1-ighv |(9677, 9986)|2.96189235973|(0.986,0.977,1.000)|1
VQCEVQLVESGGGLAKPGGSLRLSCAASGFSFSDYYMYWVRQAPGKGLEWVSGISYTGGS
TYYADSVKGRFTISRENAKNTLYLQMDSLRAEDTAVYYCAR
>V181RF-AQIA01075825.1-ighv |(15487, 15796)|2.98675601537|(0.992,0.997,0.998)|1
VQCEVQLVESGGGLVQPGGSLRLSCAASGFTFSSYWMYWVRQAPGKGLEWVSRISSDGSS
TSYADSVKGRFTISRENAKNSLYLQMNSLRAEDTAVYYCAK
>V182RF-AQIA01075825.1-ighv |(23332, 23647)|2.93841247584|(0.994,0.967,0.981)|1
VQCEVQLVESGGGLVQPGGSLRLSCAASGFTFSSSAMHWVRQASGKGLEWVGRIRSKSNN
YETGYAASVKGRFTISRDDSKNTAYLQMNSLKTEDTAVYYCTT
>V183RF-AQIA01075826.1-ighv |(7442, 7757)|2.87086319439|(0.951,0.988,0.938)|1
VQCEVQLVESGGGLVQPGGSLRLSCAASGFTFSDYYMSWVRQAPGKGPEWVGFIRNKANG
GTAEYAASVKGRFTISRDDSKSIASLQMNSLKTEDTAVYYCAR
>V184RF-AQIA01075827.1-ighv |(12747, 13054)|2.8847381818|(0.940,0.967,0.991)|1
VQCEVQLAESGGGLVQPGGSLRLSCAASGFTFSSYEMHWVRQAPGKGLESVSVIGGDSSY
THYADSVKGRFTISRDNAKNSLSLQMNSLRAEDTAVYYCA
>V185RF-AQIA01075830.1-ighv |(638, 945)|2.71533096941|(0.937,0.969,0.846)|1
AHSQVQLVQSGAEVKQPGASVKVSCKASGYTFTSYGMNWLRQAPGQRLEWMGGINTNTGN
PTYAQGFKERFTFSMDTSISTAYLQISSLKAEDTAVYYCA
>V186RF-AQIA01075832.1-ighv |(13782, 14094)|2.97571202074|(0.996,0.990,0.990)|1
VLSQVQLQESGPGLVKPSETLSLTCAVSGGSISSGYYWSWIRQPPGKGLEWIGYIYGSSG
STYYNPSLKSRVTISKDTSKNQFSLKLSSVTAADTAVYYCAR
>V187RF-AQIA01075832.1-ighv |(26831, 27140)|2.97360803841|(0.996,0.989,0.989)|1
VQCEVQLVESGGGLAKPGGSLRLSCAASGFTFSSYWMYWVRQAPGKGLEWISAISSGGGS
TYYADSVKGRFTISRDNSKNTLSLQMNSLRAEDTAVYYCAK
>V188RF-AQIA01075832.1-ighv |(39067, 39376)|2.90790924071|(0.952,0.997,0.968)|1
VQCDVQLVESGGGLVKPGGSLRLSCVASGFTFSSYVMHWVRQAPGKGLEWVSVISESGGT
IYYADSVKGRFTISRDNAKNSLFLQMNSLRAEDTAVYYCTR
>V189RF-AQIA01075832.1-ighv |(43031, 43343)|2.79650593115|(0.903,0.937,0.993)|1
VLSQVQLQESGPGLVKPSETLSLTCAVSGYSISSGYYWGWIRQPPGKGLEYIGYISGSSG
STYYNPSLKSRVTISKDTSKNQFSLKLSSVTAADTAVYYCAR
>V190RF-AQIA01075834.1-ighv |(701, 1011)|2.78552013771|(0.983,0.990,0.866)|1
VLSQVQLQESGPGLVKPSETLSLTCAVSGGSISSSNWWSWIRQSPGKGLEWIGGIYGSGG
STEYNPSLKSRVTISIDTSKNQFSLKLSSVTAADTAVYYCA
>V191RF-AQIA01075834.1-ighv |(15808, 16117)|2.95638527945|(0.992,0.994,0.972)|1
VLSQVQLQESGPGLVKPSETLSLTCAVSGGSISGYYWSWIRQSPGKGLEWIGYIYGSGSS
TNYNPSLKSRVTISKDTSKNQFSLKLSSVTAADTAVYYCAR
>V192RF-AQIA01075844.1-ighv |(4662, 4971)|2.94436078502|(0.984,0.995,0.967)|1
VLSQVQLQESGPGLVKPSETLSLTCAVSGGSISSNYWSWIRQPPGKGLEWIGNIDGNTAD
TNYNPSLKSRVTISKDTSKNQFSLKLSSVTAADTAVYYCAR
>V193RF-AQIA01075848.1-ighv |(16337, 16646)|2.47431013128|(0.911,0.749,0.914)|1
AQSQVQLVQSGAEVKKPGASVKLSCKASGYTFTSYYINWVRQAPEQVLDWMGWINPSNGN
TGYAQKFQGRVTMTRDTSTSTAYMELNSLRSEDTAVYYCAR
>V194RF-AQIA01075848.1-ighv |(34897, 35206)|2.62776419089|(0.943,0.988,0.792)|1
AQSQVQLVQSGAEVKKPGASVKVSCKASGFTFGSYAISWVRQAPGQGLEWMGGIIPLVGI
TNYAEKFQGRVTITADTSTSTAYMELSSLRSEDTAVYYCAR
>V195RF-AQIA01075855.1-ighv |(3762, 4071)|2.86265837906|(0.982,0.995,0.908)|1
VLSQVQLQESGPGLVKPSETLSLTCAVSGGSISSNYWSWIRQPPGKGLEWIGYIYGSGSS
TNYNPSLKSRVTLSVDTSKNQLSLKLSSVTAADTAVYYCAR
>V196RF-AQIA01075856.1-ighv |(13880, 14195)|2.88268890225|(0.995,0.915,0.998)|1
VLSQVQLQESGPGLVKPSETLSLTCAVSGGSISGGYYYWSWIRQPPGKGLEWIGNIYGNS
ASTYYNPSLKSRVTISKDTSKNQFSLKLSSVTAADTAVYYCAR
>V197RF-AQIA01075857.1-ighv |(5233, 5548)|2.79323497709|(0.980,0.869,0.993)|1
VLSQVQLQESGPGVVKPSETLSLTCAVSGGSISSGYYYWSWIRQPPGKGLEWIGGIYSNS
ESTNYNPSLKSRVTISKDTSKNQFSLKLSSVTAADTAVYYCAR
>V198RF-AQIA01075859.1-ighv |(15555, 15867)|2.9738720041|(0.994,0.990,0.990)|1
VLSQVQLQESGPGLVKPSETLSLTCAVSGGSISDSYWWSWIRQPPGKGLEWIGYIYGSST
STNYNPSLKSRVTISKDTSKNQFSLKLSSVTAADTAVYYCAR
>V199RF-AQIA01075860.1-ighv |(3491, 3803)|2.96298400013|(0.987,0.989,0.987)|1
VLSQVQLQESGPGLVKPSETLSLTCAVSGGSISSSNWWSWIRQPPGKGLEWIGNIGGSSG
STYYNPSLKSRVTISKDTSKNQFSLKLSSVTAADTAVYYCAR
>V200RF-AQIA01075862.1-ighv |(11827, 12136)|2.96478801933|(0.990,0.983,0.992)|1
VQCEVQLVESGGGLAKPGGSLRLSCAASGFTFSDYYMHWVRQASGKGLEWVSSISNGGGS
TWYADSVKGRFTISRENAKNTLYLQMDGLRAEDTAVYYCAR
>V201RF-AQIA01075862.1-ighv |(19656, 19971)|2.4809497655|(0.786,0.942,0.961)|1
VKCEAQLMETGGGLVQPGGSLRLSCAASGFTFSDHYMQWVRQAPGKGLEWVGLIRNKADG
ETTDYAASVKGRFTISRDDSKSITYLQMNNLKTEDTAVNYCAR
>V202RF-AQIA01075862.1-ighv |(23165, 23477)|2.7759754531|(0.916,0.989,0.894)|1
VLSQVQLQESGPGLVKPSETLSLTCAVSGGSISSSNWWSWIRQPPGKGLEWIGRISGSGG
STSYNPSLKSRVTISKDTSKNQFSLKLSSVTAADTAVYYCAR
>V203RF-AQIA01075862.1-ighv |(31521, 31830)|2.62064443787|(0.986,0.978,0.794)|1
VQCEVQLVESGGGLVQPGGSLRLSCAASGFTFSSYGMHWVCQAPGKGLEWVAVISYDGSQ
KYYADSVKDRFTISRDNSNNMLYLQMNNLKLEDTAVYYCAT
>V204RF-AQIA01075862.1-ighv |(73169, 73478)|2.57585233743|(0.987,0.930,0.801)|1
VQCEVQLVESGGGLVQPGASLRLSCAASGFTFSSTRMNWIRQAPGKRLEWVTDIKYDGSE
KYYVDSVKGRFTISRDNAKNSLYLQMNSLRAEDTAVYYCVR
>V205RF-AQIA01075862.1-ighv |(80457, 80766)|2.55384533896|(0.965,0.967,0.767)|1
VCAEVQLVQSGAEVKRPGESLRISCKTSGYSFTSSWISWVRQMPGKGLEWMGSIYPGDSD
TRYNPSFQGHVTISADKSISTTYLQWSSLKASDTATYYCAK
>V206RF-AQIA01075865.1-ighv |(14324, 14639)|2.97975601537|(0.997,0.992,0.991)|1
VQCEVQLVESGGALAQPGGSLRLSCAASGFTFSDYYMDWVHQAPGKGLEWVGRIRNKANS
YTTEYAASVKGRFTISRDDSKNTLYLQMSSLKTEDTAVYYCAR
>V207RF-AQIA01075867.1-ighv |(12905, 13214)|2.63511517971|(0.981,0.977,0.800)|1
VQCEVQLVESGGGLAKPGGSLRLSCAASGFSFSDYYMYWVRQAPGKGLEWVSSISGSSSS
TYYPDSVKGRFTISRDNAKNTLYLQMNSPRAEDTAVYYCAR
>V208RF-AQIA01075867.1-ighv |(22147, 22453)|2.74408132485|(0.875,0.959,0.986)|1
VQCEVQLVESGGGLVQPGGSLRLSCGFTFSDHYMSWVRQAPGKGPEWVGFMRNKANGGTT
EYATSVKGRFTISRGDSKSIASLQMSSLKTEDTAVYYCAR
>V209RF-AQIA01075868.1-ighv |(2740, 3049)|2.95721230726|(0.991,0.977,0.990)|1
VQCEVKLVESGGGLVQPGGSLRLSCAASGFTFSNYWMFWVRQAPGKGLEWVSSISGSSSS
TYYPDSVKGRFTISRDNAKNTLYLQMNSLRAEDTAVYYCAR
>V210RF-AQIA01075868.1-ighv |(14808, 15114)|2.16123950876|(0.984,0.649,0.911)|1
VQCEVQLVESGGGLVQPGGSLRLSCAASGFTSGNSDLIWIRQAPGKGLEWVSYISSGGSI
YYSDSVKGRFTISRDNAKNTLYLQMSSLRVEDTAVYYCAK
>V211RF-AQIA01075871.1-ighv |(1079, 1388)|2.80574548772|(0.919,0.983,0.920)|1
VQCEVQLVESGGGLVQPGGSLRLSCAASGFTFSNAWMNWVRQAPGKGLVWVARIKSKANG
ETADYAASVKGRFTISRDDSKNTLYLQMNSLKTEDTAVYYC
>V212RF-AQIA01007908.1-igkv |(8863, 9163)|2.9783881665|(0.998,0.995,0.986)|-1
ARCDIQMTQSPSSQSASVGDRVTITCQASQSLSNYLNWYQQKPGKIPKLLIYRASSLQSG
IPSRFSGSGSGTDFTLTISSLQPEDFATYYCQQGYSYP
>V213RF-AQIA01009604.1-iglv |(6357, 6655)|1.87905222695|(0.795,0.563,0.731)|-1
LCALPVLTQPPSASASLGASVKLTCTLSSEHSNYFIFWYQQRPGRSPRYIMKVNSDGTQS
KGDGIPDRFLGSSSGADRYLTISNLQSDDEAEYYCGE
>V214RF-AQIA01017094.1-igkv |(132911, 133229)|2.36993017926|(0.979,0.714,0.931)|-1
STGDIVMTQTPLSLPVTLGEPASISCRSSQSLLDSEDGNTYLDWYLQKPGQSPQLLIYEV
SNRASGVPDRFSGSGSDTDFTLKISRVEAEDVGVYYCMQGIEYP
>V215RF-AQIA01017118.1-igkv |(14570, 14870)|2.96996400065|(0.991,0.988,0.991)|-1
ARCDIQMTQSPSSLSASVGDRVTITCRASQGINNYLSWYQQKPGKAPKPLIYYASSLETG
VPSRFSGSGSGTDYTLTISSLQPEDIATYYCQQYNNSP
>V216RF-AQIA01017118.1-igkv |(20337, 20639)|2.50791275506|(0.919,0.833,0.822)|-1
SSGDVVMTQSPLSLPITPGQPASISCRSSQSLVHSDGKTYLNWLQQKPGQPPRRLIYQVS
NRDSGVPDRFSGSGAGTDFTLKISRVEAEDVGVYYCMQG
>V217RF-AQIA01017118.1-igkv |(36827, 37129)|2.37126212082|(0.951,0.885,0.730)|-1
SSGDVVMTQSPLSLPITPGQPASISCRSSQSLVHSNGNTYLSWYQQKPGQPPRLLIYQVS
NRDSGVPDRFSGSGAGTDFTLKISRVEAEDVGVYYCGQG
>V218RF-AQIA01017118.1-igkv |(47001, 47316)|2.50305623113|(0.966,0.798,0.877)|-1
SGGDIVMTQTPLSLPVTPGEPASISCRSSQSLLHTDGYTYLDWYLQKPGQSPQLLIYGGS
NRASGVPDRFSGSGSGTDFTLKISKVEAEDVGVYYCMQHKALP
>V219RF-AQIA01017118.1-igkv |(71244, 71559)|2.49517625925|(0.985,0.748,0.965)|-1
SSGDIVMTQTPLSLPVTLGEPASISCRSSQSLLSSNGYNYLNWYLQKPGQSPQLLIYYGS
NRASGVPDRFSGSGSGTDFTLKISRVEAEDVGVYYCMQALQTP
>V220RF-AQIA01017118.1-igkv |(79515, 79815)|2.56822603479|(0.957,0.990,0.764)|-1
TRCAIQMTQSPSSLSASVGDTVTITCRASQSIGSNLAWYQQKPGKVPKLLIYAASTLQSE
VPSRFSGSGSGTDFTLTISSLQPEEVATYYCQKCDSAP
>V221RF-AQIA01017118.1-igkv |(115261, 115563)|2.524476495|(0.948,0.823,0.851)|-1
STGDVVMTQSPLSLPVTLGQPASISCRSSQSLLHSNGNTYLSWFQQKPGQSPRRLIYKVS
NRDSGVPDRFSGSGAGTDFTLKISRVEAEDVGVYYCMEG
>V222RF-AQIA01017118.1-igkv |(131697, 131995)|2.71803796974|(0.974,0.829,0.998)|-1
SKGEIVLTQSPAFQSVTLKEKVTITCQASQSIGSSLHWYQQKPDQSPKLLIKYASQSISG
VPSRFSGSGSGTDFTLTINSLEAEDAATYYCQQSSSF
>V223RF-AQIA01017118.1-igkv |(160930, 161230)|2.63499606504|(0.986,0.824,0.935)|-1
TTGQVVLTQSPATLSLSPGERATLSCRASQSVSSSLAWYQQKPGQAPRLLIYGASSRATG
IPDRFSGSGSGTEFTLTISSLEPEDFAVYYCQKYSSSP
>V224RF-AQIA01017118.1-igkv |(166412, 166712)|2.91370803341|(0.973,0.965,0.976)|-1
VRCDIQMTQAPSFLSASVGDRVTITCQASQSISNDLAWYQQKPGKSPTLLIYDATNLHTG
VPSRFSGSGSGADYSLTISSLELEDFAAYYCQQEYSYP
>V225RF-AQIA01017120.1-igkv |(6524, 6816)|2.80824910116|(0.961,0.885,0.988)|-1
SRGDIVMTQSPAFVSVTPGEKVTITCQASEGISNYLHWYQQKPDQAPKLFIQYASQSISG
VPSRFTGSGSGTDFTFTISSLEVEDAATYYCQQGN
>V226RF-AQIA01017120.1-igkv |(22790, 23081)|2.88648631714|(0.974,0.964,0.951)|-1
DIQMTQSPSSLSASVGDTVTITCRASQSFSSSLAWYQQKPGKAPKLLIYSASSLQSGVPS
RFSGSKSGTDFTLTISSLQPEDIASYYCQQYYSYP
>V227RF-AQIA01017120.1-igkv |(38344, 38636)|2.97456408064|(0.996,0.993,0.986)|-1
AKCDIQMTQSPSSLSASVGDRVTITCRASQTISSYLAWYQQKPGKVPKLLIYAASSLESG
VPSRFSGSGSGTEFTLTISSLQPEDFATYYCQQHN
>V228RF-AQIA01017120.1-igkv |(57654, 57954)|2.83117045275|(0.997,1.000,0.884)|-1
ARCDIQMTQSPSSLSASVGDRVTITCRASQGISTYLNWYQQKPGKAPKLLIYAASSLQSG
VPSRFSGSGSGTEFTLTISSLQPEDFATYYCLQYNSKP
>V229RF-AQIA01017120.1-igkv |(72400, 72698)|2.77427075435|(0.996,0.930,0.901)|-1
TTGEIVMTQSPATLSLSPGERATLSCRASQSVSSSLAWYQQKPGQAPRLLIYGASSRATG
IPDRFSGSGSGTEFTLTISSLEPEDFAVYYCQQYSNW
>V230RF-AQIA01017120.1-igkv |(84992, 85292)|2.72744130129|(1.000,1.000,0.833)|-1
ARCDIQMTQSPSSLSASVGDRVTITCRASQGISNYLNWYQQKPGKAPKLLIYAASSLQSG
VPSRFSGSGSGTEFTLTISSLQPEDFATYYCQPFKNYL
>V231RF-AQIA01017122.1-igkv |(11088, 11376)|2.26962300417|(0.736,0.867,0.733)|-1
IVMTQSPATLSLSPGETATLSCRASQSVGSYLAWYQQKPGQAPKLLVHSAYFRATGIPDR
FSGSGSRTEFTLTISSLEPEDVGVYHCQQYNDLL
>V232RF-AQIA01017123.1-igkv |(8475, 8775)|2.9753881665|(0.995,0.983,0.998)|-1
ARCDIQLTQSPSSLSASVGDRVTITCRASQGISSYLAWYQQKPGKAPKLLIYKASTLQSG
VPSRFSGSGSGTDFTLTISSLQPEDFAVYYCQQRNSYP
>V233RF-AQIA01017123.1-igkv |(15101, 15401)|2.97476801985|(0.993,0.986,0.996)|-1
AKCDIQMTQSPSSLSASVGDRVTITCRASQGISSYLAWYQQKPGKAPKPLIYYASNLESG
VPSRFSGSGSGTEFTLTISSLQPEDFATYYCQQYNSDP
>V234RF-AQIA01017123.1-igkv |(32082, 32382)|2.84422081075|(0.998,1.000,0.891)|-1
ARCDIQMTQSPSSLSASVGDRVTITCRASQGISNYLSWYQQKPGKAPKLLIYAASSLQSG
VPSRFSGSGSGTEFTLTISSLQPEDFATYYCLQGYSTP
>V235RF-AQIA01017123.1-igkv |(42629, 42935)|2.82786624165|(0.968,0.917,0.954)|-1
TVMTQSPATLSLSPGERATLSCRASQSVSSSLAWYQQKPGQAPRLLIYYASSRATGIPDR
FSGSGSGTEFTLTISSTLTISSLDPEDVGVYYCQKYNDWP
>V236RF-AQIA01017125.1-igkv |(705, 1005)|2.97721230726|(0.997,0.983,0.998)|-1
ARCDIQLTQSPSSLSASVGDRVTITCRASQGISSYLAWYQQKPGKAPKLLIYAASNLQSG
VPSRFSGSGSGTDFTLTISSLQPEDFAVYYCQQRNSYP
>V237RF-AQIA01017126.1-igkv |(2367, 2667)|2.95609598554|(0.998,1.000,0.963)|-1
ARCDIQMTQSPSSLSASVGDRVTITCRASQGISSYLNWYQQKPGKAPKLLIYYANSLASG
VPSRFSGSGSGTDYTLTISSLQPEDFATYYCQQGNSNP
>V238RF-AQIA01017126.1-igkv |(20855, 21155)|2.8264047108|(0.987,0.954,0.912)|-1
TTGEIVMTQSPATLSLSPGETATISCRTSQSVSSYLAWYQQKPGQAPRLLIYGASSRATG
IPDRFSGSGSGTDFTLTISSLEPEDFAVYYCQETSNLS
>V239RF-AQIA01017128.1-igkv |(28886, 29186)|2.95593200206|(0.987,0.986,0.983)|-1
ARCDIQMTQSPSSLSASVGDTVTITCRASQGISSYLNWFQQKPGKAPKLLIYAASSLESG
VPSRFSGSGSGTEFTLTISSLQPEDFATYYCLQYNSYP
>V240RF-AQIA01017128.1-igkv |(35341, 35641)|2.18157073978|(0.871,0.982,0.612)|-1
ARCDIQMTQSPSSLSASVGDRVTITCQASQGISSWLAWYQQKPGKAPKLLLYKAPGLQSG
VPSMFSGSGSGTEFTLTISSLQPEYFATYYCQQFSSAL
>V241RF-AQIA01017128.1-igkv |(51771, 52071)|2.69046344043|(0.972,0.872,0.904)|-1
TTGEIVMTQSPATLSLSPGERATLSCRASQSVSSRLAWYQQKPGQAPRLLIYGASSRATG
IPDRFSGSGSGTEFTLTISSLEPEDVGVYYCQQDYSWP
>V242RF-AQIA01017128.1-igkv |(94686, 94986)|2.99899600001|(1.000,1.000,0.999)|-1
ARCDIQMTQSPSSLSASVGDRVTITCRASQGISSYLAWYQQKPGKAPKLLIYDASNLQSG
VPSRFSGSGSGTDFTLTISSLQPEDFATYYCQQHNSYP
>V243RF-AQIA01017128.1-igkv |(113498, 113796)|2.72888365928|(0.985,0.930,0.874)|-1
TTGEIVMTQSPATLSLSPGERATLSCRASQSVSSSLAWYQQKPGQAPRLLIYGASSRATG
IPDRFSGSGSGTDFTLTISSLEPEDVAVYYCLQRSNW
>V244RF-AQIA01017130.1-igkv |(1559, 1859)|2.8892535796|(0.981,0.945,0.969)|-1
ARCDIQMTQSPSSLSASVGDKVTITCHASQGISSWLAWYQQKPGKAPKPLIYKASSLQSG
VPSRFSGSGSGTDYTLTISSLQPEDFATYYCQQYDNLP
>V245RF-AQIA01017133.1-igkv |(667, 967)|2.92505544896|(0.988,0.945,1.000)|-1
ARCDIQMTQSPSSLSASVGDKVTITCHASQGISSWLAWYQQKPGKAPKPLIYKASSLQSG
VPSRFSGSGSGTDFTLTISSLQPEDFATYYCQQYSSYP
>V246RF-AQIA01017135.1-igkv |(10903, 11203)|2.95410021834|(0.986,0.974,0.995)|-1
AKCDIQMTQSPSSLSASVGDKVTITCQASQSISSWLAWYQQKPGKAPKPLIYKASSLESG
VPSRFSGSGSGTDFTLTISSLQPEDFATYYCQQHNSYP
>V247RF-AQIA01017135.1-igkv |(26554, 26853)|2.5193523296|(0.957,0.853,0.822)|-1
TTGETVMTQSPATLSLSPGERATLSCRASQSVGSTLAWYQQKPGQAPRLLIYGASSRATG
IPDRFSGSGSGTEFTLTISSLEPEDVGVYYCQQESNWK
>V248RF-AQIA01017139.1-igkv |(38517, 38829)|2.70960420047|(0.885,0.942,0.896)|-1
CNGDIVLTQSPASLAVSPGQRATITCRASESVSFFGINLIHWYQQKPGQPPKLLIYQASN
KDTGVPARFSGSGSGTDFTLTINPVEADDAADYYCLQSKNSP
>V249RF-AQIA01017139.1-igkv |(56358, 56649)|2.5371594037|(0.935,0.823,0.854)|-1
IVLTQSPTSMAVSQGERVTISCTASSSVSTSYLHWYQQKPGFPPRLLVYRTSSLASGVPA
RFSGSGSGTSYTLTISSMEAEDAANYYCQQAHSIP
>V250RF-AQIA01064169.1-trdv |(156383, 156689)|1.91558630256|(0.680,0.564,0.900)|-1
RGMLCDKVTQSSPDQMVASGSEVVLLCTYDSTYSDPGLFWYRIRPDYNFQFVFYGDKSRS
HGSYFAKGRFSVKHLLTQKAFHLVISPVSTEDSATYYCAM
>V251RF-AQIA01066360.1-ighv |(8136, 8449)|2.86173453214|(0.973,0.988,0.915)|-1
VQCEVQLVESGGGLVQPGGSLRLSCAASGFTFSNYYMHWVRQAQGKGLEWVGLIRNKANS
YTTEYAAAVKGRFTISRDDSKNTLYLQMSSLKTEDTALYYCT
>V252RF-AQIA01066360.1-ighv |(18228, 18531)|2.4818744895|(0.987,0.732,0.992)|-1
VQCEVQLAESGGGLVQPGRSLRPSCAASGFTFSSYGMHWVRQAPEEGLEWVSYIGSSTMY
YADSVKGRFTISRDNAKNSLYLQMNSLRAEDTAVYYCVR
>V253RF-AQIA01066360.1-ighv |(33143, 33465)|1.86510643906|(0.923,0.826,0.561)|-1
VFSQVTLKESGPALVKPTQTLTLTCTFSGFSLSTSGMGVGWIRQPPGKALEWLARIDWDD
DKYYSPSLKSRLTISKDTSKNQVVLTMTNMDPVDTATYYCARGAQ
>V254RF-AQIA01066360.1-ighv |(57288, 57597)|2.79021190691|(0.906,0.920,0.999)|-1
VQCEVQLVESGGGLVQPGGSLRLSCTGSGFTFSSYYMYWIRQAPGKGLQWVSAINTGGGS
TWYTDSVKGRFTISKENAKNTLYLQMDSLRAEDTAVYYCAK
>V255RF-AQIA01066362.1-ighv |(1746, 2054)|2.64708291274|(0.934,0.894,0.852)|-1
VQGEVQLVESEGNFVQPGGSLRLSCAASGFTFSSCDLDWIRHAPGKGLEWVSGISIAGST
YYANSVKGRFAISRGNAKNTLYLQMYSLIAEDTAIYYCVSE
>V256RF-AQIA01066362.1-ighv |(12791, 13106)|2.97553206285|(0.993,0.999,0.984)|-1
VQCEVQLVESGGGLVQPGGSLRLSCAASGFTFSNYWMSWVRQAPGKGLEWVGFIKNKADG
GTAAYAESVKGRFTISRDDSKNTLYLQMNSLKTEDTAVYYCTR
>V257RF-AQIA01066366.1-ighv |(294, 607)|2.98879201242|(0.993,0.999,0.997)|-1
VQCEVQLVESGGGLVQPGGSLRLSCAASGFTFSNYWMSWVRQAPGKGLEWVGFIKNKADG
GTADYAASVKGRFTISRDDSKNTLYLQMSSLKTEDTAVYYCT
>V258RF-AQIA01066369.1-ighv |(10385, 10694)|2.72443827172|(0.971,0.978,0.841)|-1
VCAEVQLVQSGAEVKRPGESLKISCKTSGYSFTSYWISWVRQMPGKGLEWMGAIDPSDSD
TRYSPSFQGQVTISADKSISTAYLQWSSLKASDSATYYCAK
>V259RF-AQIA01066369.1-ighv |(30516, 30824)|2.64708291274|(0.934,0.894,0.852)|-1
VQGEVQLVESEGNFVQPGGSLRLSCAASGFTFSSCDLDWIRHAPGKGLEWVSGISIAGST
YYANSVKGRFAISRGNAKNTLYLQMYSLIAEDTAIYYCVSE
>V260RF-AQIA01066378.1-ighv |(784, 1093)|2.8127534398|(0.983,0.883,0.986)|-1
VQGEVQLVESGGGLAKPGGSLRLSCAASGFTFSSYWMHWVRQAPGKGLEWISAINSAGSS
TYYADSVKGRFTISRENAKNTLYLQMDGLRAEDTAVYYCAG
>V261RF-AQIA01066385.1-ighv |(742, 1051)|2.57109155482|(0.949,0.981,0.768)|-1
AHSEVQLVQSGAELKKPGASVKVSCKVSGYTFTELSMHWVRQVPGKGLEWMGGVDPVYGE
IIHAEKFQGRVTMTEDTSTDTAYMELSSLRSEDTAVYYCAR
>V262RF-AQIA01066385.1-ighv |(14117, 14432)|2.96950008499|(0.995,0.990,0.985)|-1
VQCEVQLVESGGGLVQPGGSLRLSCAASGFTFSDYAMDWVRQAPGKGLEWVGFIRSKAYG
GTAEYAASVKGRFTISRDDSKNTAYLQMSSLKTEDTAVYYCTR
>V263RF-AQIA01066387.1-ighv |(6564, 6873)|2.97272803289|(0.993,0.995,0.985)|-1
VQCEVQLVESGGGLVQPGGSLRLSCAASGFTFGDYGMHWVRQAPGKGLEWVSSISNTGKT
IYYADSVKGRFTVSRDNAKNSLSLQMSSLRAEDTAVYYCTR
>V264RF-AQIA01066387.1-ighv |(11668, 11974)|2.98598400013|(0.996,0.996,0.994)|-1
VQCEVQLVESGGGLVQPGGSLRLSCAASGFTFSSYGMSWVRQAPGKGLEWVSAISSGGST
YYADSVKGRFTISRDNSKNTLSLQMNSLRAEDTAVYYCAK
>V265RF-AQIA01066387.1-ighv |(59837, 60146)|2.73396247|(0.943,0.994,0.845)|-1
AHSQVQLVQSGAEIKQPGASVKLSCKASGYTFTSYYMHWVRQAPGQGLEWIGLISPYNGN
KGYAQNFQGRVTITTDTSTSTGYMELSSLRSEDTAVYYCTR
>V266RF-AQIA01066387.1-ighv |(66519, 66828)|2.97988400513|(0.991,0.993,0.996)|-1
VQCEVQLVESGGGLAKPGGSLRLSCAASGFTFSDYYMDWVRQAPGKGLEWVSRISNGGGS
TWYADSVKGRFTISRENAKNTLYLQMNSLRAEDTAVYYCAR
>V267RF-AQIA01066387.1-ighv |(78167, 78474)|2.02665422251|(0.939,0.997,0.553)|-1
VQCEVQLVESGGGLVQPGGSLRLSCAASGFTFSDDYMEWVRQAPGKGLEWVGQINPNGGT
TFLMDSVKGRFTISRDNAKNTLYLQINSLKIEDTAVYYCT
>V268RF-AQIA01066387.1-ighv |(87163, 87466)|2.84535178036|(0.959,0.981,0.915)|-1
VQCEVQLAESGGGLVQPGGSLRLSCAASGFTISSYWMSWVCQAPGKGLEWLSDIYGSTMY
YGDSVKGLFTVSRDNAKNSLYLQMNSLRAEDTAVYYCTR
>V269RF-AQIA01066387.1-ighv |(93938, 94252)|2.62838866514|(0.967,0.794,0.981)|-1
VLSQVTLKESGPALVKPTQTLTLTCTFSGFSLTTSGMGVGWIRQPPGKALEWLASIYWDD
DKYYSTSLKSRLTISKDTSKNQVVLTMTNMDPVDTATYYCARR
>V270RF-AQIA01066387.1-ighv |(108611, 108920)|2.89769465218|(0.975,0.951,0.974)|-1
VLSQLQLQESGPGLVKPSETLSLTCAVSGGSISSNYWSWIRQPPGKGLEWIGRISGSGGS
TDYNPSLKSRVTISTDTSKNQFSLKLSSVTAADTAVYYCAR
>V271RF-AQIA01066395.1-ighv |(6190, 6505)|2.73788121229|(0.941,0.899,0.909)|-1
VQCEVQLVESGGGLVQPGGSLRPSCAASGFTFSSSAMHWVRQASGKGLEWVGRIRSKSNN
YATEYAASVKGRFTISRDDSKNTACLQMSSLKTEDTAVYYCAR
>V272RF-AQIA01066395.1-ighv |(16120, 16435)|2.96021230726|(0.992,0.991,0.978)|-1
VQCEVQLVESGGGLVQPGGSLRLSCAASGFTFSDHYMFWVRQAPGKGLEWVGFIRSKAYG
GTAEYAASVKGRFTISRDDSKSIAYLQMSSLKTEDTAVYYCTR
>V273RF-AQIA01066397.1-ighv |(6540, 6849)|2.76245229851|(0.978,0.958,0.872)|-1
AHSQVQLVQSGPEVKQPGASVKVSCKASGYSFTTYGMNWVRQAPGQGLEWMGWMNTYTGN
PTYAQGFTERFVFSMDTSVSTVYLQISSLKGEDTAVYYCAR
>V274RF-AQIA01066397.1-ighv |(62192, 62507)|2.96719216959|(0.996,0.987,0.985)|-1
VQCEVQLVESGGGLVQPGGSLRLSCAASGFTFSNHYMYWVRQAPGKGLEWVGFIRSKAYG
GTAEYAASVKGRFTISRDDSKNTAYLQMSSLKTEDTAVYYCTR
>V275RF-AQIA01073275.1-ighv |(1217, 1526)|2.81732820827|(0.967,0.944,0.918)|-1
DHSEVQLVQSGAEVKKPGASVKISCKASGYTFTDYYLHWVRQAPGKGLEWMGRVDPEDGE
ADYAQKFQDRVTITADTSTDTAYMELSSLRSEDTAVYYCAT
>V276RF-AQIA01073275.1-ighv |(9357, 9667)|2.97651611711|(0.996,0.996,0.985)|-1
VQCEVQLVESGGGLVQPGGSLRLSCVASGFTFSDHYMDWVRQAPGKGLEWVSSISTGSGS
TTLYPDSVKGRFTISRDNAKNTVYLQMNSLRAEDTAVYYCA
>V277RF-AQIA01075132.1-igkv |(288, 575)|2.77335180947|(0.971,0.868,0.976)|-1
TVMTQSPATLSLSPGERATLSCRASQSVGSNLAWYQQKPGQAPRLLIYDASSRATGIPDR
FSGSGSGTEFTLTISSLEPEDVGVYYCQQYNNWN
>V0RF-ADFV01062069.1-trbv |(7339, 7633)|1.92376534126|(0.711,0.897,0.547)|1
SMDTGITQTPKYLVTAMGSKRMMKCEHLGHDSMYWYRQKAKKSLEFMFYYNCKELIENKT
VPNHFTPECPDSSRLHLHVVTLQQEDSALYLCTSSQ
>V1RF-ADFV01062069.1-trbv |(9538, 9829)|2.47197160312|(0.909,0.836,0.797)|1
PEVTQTPSHQVTQMGQEVILRCVPISNHLYFYWYRQILGQKFEFLVSFYSDKVSDKSEIF
DEQFSVERPDGSNFTLKIRSTKLEDSAMYFCASSE
>V2RF-ADFV01062069.1-trbv |(21787, 22100)|2.37886919643|(0.885,0.923,0.702)|1
PIDTEVTQTPKHLVMGISNKKSLKCEQHMGHRAMYWYKQKAKKPPELMFVYSYEKLSINE
SVPSRFSPECPKSSLLNLHLHALQPEDSALYLCASSQDTALQ
>V3RF-ADFV01062069.1-trbv |(29967, 30258)|2.38087484209|(0.838,0.734,0.852)|1
PEVTQTPSHQVTQMGQEVILQCVPISNHLRFYWYRQILGQKIEFLLYFFDGKISEKSEIV
DDRFSAARPDGSPFTLKIQSTKLEDSATYFCASSE
>V4RF-ADFV01062069.1-trbv |(35848, 36139)|2.39793423061|(0.828,0.754,0.838)|1
PEVTQTPSHQVTQMGQEVILQCVPISNHLHFYWYRQIMGQKIEFLLYFFNGKISEKSEIV
DDRFSAARPDGSPFTLKIQSTKLEDSATYFCASSE
>V5RF-ADFV01062069.1-trbv |(42333, 42630)|2.52836699101|(0.918,0.912,0.776)|1
SLDTAVSQTPKYLVTQMGNDKSLKCEQNLGHDTMYWYKQDSKKFLKIMFSYRNKEPILNE
TVPNRFSPDSPDKAHLNLHIKSLELGDSAVYFCASSQ
>V6RF-ADFV01062069.1-trbv |(46363, 46676)|2.3836466563|(0.897,0.879,0.723)|1
PIDTEVTQTPKHLVMGMTNKKSLECEQHMGHNAMYWYKQKAKKPPELMFVYNYEKLSINE
SVPSRFSPECPKSSLLNLHLHALQPEDSALYLCASSQDTALQ
>V7RF-ADFV01062069.1-trbv |(54249, 54565)|2.7081261813|(0.925,0.854,0.952)|1
PVEAGVTQTPRYLIKTRGQQVTLSCSPISGHQSVFWYQQTPGQGLQFLFEYFSETQREKG
NFPDRFSGRQFSNSRSEMNVSTLELGDSALYLCASSLAQPYKA
>V8RF-ADFV01062069.1-trbv |(61551, 61858)|2.9130882474|(0.981,0.981,0.954)|1
PVNAGVTQTPKFQVLKTGQSMTLQCAQDMNHNSMYWYRQDPGMGLRLIHYSVGEGTTDKG
EVPDGYNVSRLNTQDFSLRLESAAPSQTSVYFCASSEATV
>V9RF-ADFV01062071.1-trbv |(669, 965)|1.65710943165|(0.761,0.512,0.651)|1
AGVSQSLRHKVAKKGKDVALRYDAISGHNALYWYRQSLGQGLEFPVYFQGKDAADKSGLP
RDQFSAERPEGSISTLKIQRTQQGDLAVYLCASSSAT
>V10RF-ADFV01062071.1-trbv |(8280, 8577)|2.90140235426|(0.964,0.987,0.953)|1
PVNAGVTQTPKFQVLKTGQSMTLQCAQDMNHNSMYWYRQDPGMGLRLIHYSAVEGITDKG
EVSDGYNVSRLNKQNLLLRLVSAAPSQTSVYFCASSE
>V11RF-ADFV01062071.1-trbv |(16301, 16614)|2.49148389128|(0.926,0.784,0.871)|1
PLDTAVLQTPKYLVTQTGKKESLKCEQNLGHNAMYWYKQDSKKFLKIMFSYSNKEPILNE
TVPNRFSPESPDKSHLNLHISSLELGDSAVYFCASSQDTALQ
>V12RF-ADFV01062071.1-trbv |(19707, 20020)|2.41642853707|(0.933,0.870,0.752)|1
PMETGVTQTPRHLVMGMTNKKSLKCEQDLGHNAMYWYKQSAEKPLQLMFVYNLKEQIENN
SVPSRFSPECPNSSHLFLHLHALQPEDSVLYLCASSQDTALQ
>V13RF-ADFV01062071.1-trbv |(27836, 28133)|2.84302658657|(0.987,0.981,0.903)|1
PVNAGVTQTPKFQVLKTGQSMTLQCAQDMNHNYMYWYRQDPGMGLRLIHYSTGEGTTDKG
EVSDGYDVSRSNTQNFLLRLESAAPSQTSVYFCASSE
>V14RF-ADFV01062073.1-trbv |(25107, 25398)|1.90347339093|(0.843,0.639,0.678)|1
MAGITQAPRSQILAVGRSMTLRCTQDMRHNAMYWYRQDLGLGLRLMHYSNTVGTTGKGEV
PDGYSVSRANTDDSPLTLASAVPSRTSVYFCASSD
>V15RF-ADFV01062075.1-trbv |(638, 934)|2.31484375033|(0.901,0.683,0.904)|1
PVDSGVTQTPKHLITAIGQRVTLRCSPRSGDLSVYWYQQSLDQGLQFLIQYYNGEERERG
NILERFSAQQFPDLHSELNLSSLELGDSALYFCASSI
>V16RF-ADFV01062075.1-trbv |(8445, 8742)|2.12880729423|(0.893,0.613,0.892)|1
HRDAEITQSPRYKITETGRQVTLKCHQTWNHNNMFWYRQDLGHGLRLIHYSFGVPDTGKG
EVSDGYSVSRSKTEDFPLTLESAASSQTSVYFCASSE
>V17RF-ADFV01062075.1-trbv |(33395, 33695)|2.84491495942|(0.946,0.970,0.932)|1
HTGAGVSQSPRYKVTKKGQDVALRCDPISGHVSLYWYRQTLRQGPEFLTYFNYEAQQDKS
GLLSGRFSAERPEGSVSTLKIQRTEQGDTAVYLCASSL
>V18RF-ADFV01062075.1-trbv |(40699, 40989)|2.70903540658|(0.934,0.876,0.914)|1
ETGVTQSPTHLIKTRGQQVTLRCSPMSGHTSVYWYQQVLGQGLQFLLWYNEEAERERGNF
PRRFSGRQFPNYSSELNVNASLLEDSALYLCASSL
>V19RF-ADFV01062075.1-trbv |(60057, 60353)|2.69866921701|(0.918,0.847,0.961)|1
SVETGVTQSPTHLIKTRGQQVTLRCSPQSGHNTVSWYQQTLGQGPQFIVQYYREEENGRG
NFPPRFSGRQFPDYSSELNVNASLLEDSALYLCASSL
>V20RF-ADFV01062075.1-trbv |(69334, 69634)|2.45093757027|(0.808,0.894,0.781)|1
HADTGVSQDPRHKITKRGRNVTFRCDPISEHNSLYWYQRTLGQGPEFLTDFQNEAQLDKS
GLLSDHFSAERPKGSFSTLKIQRTEQGDSAMYLCASSL
>V21RF-ADFV01062075.1-trbv |(75853, 76150)|2.42119708748|(0.920,0.723,0.922)|1
SVAAGVIQSPRHLVKEKRETATLKCYPIPGHDTVYWYQQGPGQGPQFLISFYEKMQNDKG
SIPDRFSAQQFSDYHSELNMSSLELGDSALYLCASSL
>V22RF-ADFV01062075.1-trbv |(83965, 84262)|2.43428963091|(0.888,0.951,0.719)|1
HMDAGITQSPRHKVTETGTPVTLRCHQTENHCYMYWYRQDLGHGLRLIHYSYGVKDTDKG
EVSDGYSVSRSNTEDFLLTLGSATHSQTSVYFCAISE
>V23RF-ADFV01062075.1-trbv |(95774, 96074)|2.48382797528|(0.938,0.774,0.885)|1
LIEAGVVQSPRYKIIEKKQPVAFWCNPISGHNTLYWYRQNLGQGPELLIRYENEEAVDDS
QLPKDRFSAERLKGVDSTLKIQPAELGDSAVYLCASSL
>V24RF-ADFV01062075.1-trbv |(101368, 101675)|1.82905029447|(0.921,0.884,0.514)|1
AGVIQSPQHEVTEMGQEVTLRCKPISGHNSLFWYRQTMMQGLELLIYFNNNVPIDDSGMP
KDRFSAKMPDVSFSILKIQPSELRDSAVYFCASSLATALQ
>V25RF-ADFV01062076.1-trbv |(7831, 8127)|2.72852338722|(0.971,0.888,0.911)|1
PVDAGVTQSPTHLIKMRGQQVTLRCSPISGHTSVYWYQQALGQGPQFIIQYYEEEERGRG
NFPDRFSARQFPNYSSELNVNALLLGDSALYLCASSL
>V26RF-ADFV01062078.1-trbv |(10230, 10521)|2.60629332199|(0.939,0.875,0.844)|1
AGVTQFPSHRVIEKGQTVTLRCDPIPGHDYLYWYRRVMGKEIKFLICFLKESIQDESGMP
NNRFSAKSTGGTYSTLTVQPAELEDSGVYFCASSQ
>V27RF-ADFV01062079.1-trbv |(3580, 3877)|2.13512602152|(0.872,0.858,0.624)|1
HGDGMVIQNPRYQVTQLGKPVTLSCSQNLNHNVMYWYQQKSSQAPKLLFHYYDKDFNNEA
DTPDNFQSRRPNTSFCFLDIRSPGLGDAAVYLCATSR
>V28RF-ADFV01062079.1-trbv |(8562, 8862)|2.55227037078|(0.860,0.809,0.900)|1
SPGEEVTQTPKHLVKGEGQKAKLYCAPIKGHSYVFWYQQVLKKEFKFLISFQNENIFDET
GMPKERFSAKCLLNSPRSLEIQATKLKDSAVYFCASSQ
>V29RF-ADFV01062081.1-trbv |(16583, 16883)|2.42156410042|(0.921,0.733,0.901)|1
SMDTKVTQRPRLLVKANEQKAKMDCVPIKGHSYVYWYRKKLEEELKFLVYLQNEEIIQKA
EIINERFSAQCPKNSSCTLEIQSTESGDTALYFCASSK
>V30RF-ADFV01062081.1-trbv |(35693, 36012)|2.25582584698|(0.796,0.780,0.710)|1
SVLFPTRSVDADTTQIPRNRIAKTGKTIMLECSQTKGHDRMYWYRQDPGLGLRLIYYSFD
VKDINKGEISDGYRVSRQTQANFSLSLEFATPNQTALYFCATSD
>V31RF-ADFV01062082.1-trbv |(9024, 9321)|2.72464947362|(0.921,0.888,0.920)|1
LMEADIYQTPRYLVIRTGKKITLECSQTMGHDKMYWYQQDPGMELHLIHYSYGVNSTEKG
DLSSESTVSRIRTEHFPLTLESARPSHTSQYLCASSE
>V32RF-ADFV01062084.1-trbv |(20830, 21127)|2.47691495942|(0.830,0.844,0.806)|1
LLEAQVTQNPRYLITVTGKKLTVTCSQNMNHEYMSWYRQDPGLGLRQIYYSINVEAVDKG
DVPEGYNVSRKEKRNFPLILESPSPNQTSLYFCASSL
>V33RF-ADFV01062084.1-trbv |(25535, 25832)|2.63276056724|(0.885,0.829,0.946)|1
LVDVKVTQSSRYLVKRMGEKVFLECVQDMDHERMFWYRQDPGLGLRLIYFSYDVQMKEKG
DIPEGYSVSREKKEHFSLILESASTNQTSMYLCASSL
>V34RF-ADFV01062085.1-trbv |(301, 604)|2.26196006037|(0.822,0.759,0.730)|1
SVFSAVVSQKPSRDICQRGTSLTIQCQVNSQVTMMFWYRQQPGQSLTMIATANQGSEATY
ESGFVIDKFPISCPNLSFSTLTVSNMSPEDSSIYLCSVE
>V35RF-ADFV01106193.1-igkv |(6403, 6701)|2.52578495279|(0.822,0.819,0.981)|1
SRGEIVLTQSPAFLSVTPKEKVTITCRASQSIGSSLHWYQQKPDQSPKLLVKYASQSISG
VPSRFSGSGSGTDFTLTINSLEAEDVATYHCQQSSSL
>V36RF-ADFV01106193.1-igkv |(26068, 26361)|2.78105188446|(0.972,0.869,0.982)|1
TTREIVLTQSPATLSLSPGEKATLSCRASQSVGSNLAWYQQKPGQAPRLLIYGATNRATG
IPDRFSGSGSGTDFTLTISSLEPEDFAVYYCQKYGS
>V37RF-ADFV01106193.1-igkv |(39460, 39760)|2.59654905336|(0.940,0.987,0.778)|1
VRCDIQMTQSPSSLSASVGDRVTITCRASQSISNDLTWYQQKPGKAPTLLIYDATNLHTG
VPSRFSGGGSGADYSLTISSLQLEDFATYYCQQEYSYP
>V38RF-ADFV01106193.1-igkv |(55018, 55315)|1.91670067828|(0.647,0.630,0.641)|1
SRADIVMTQSPAFLSATPGEKVTVTCRASQSTGSSLRWYQQKPDQSPKLLVKYASQSISG
VPSRFSGSGSGTDFALTISSLKLKMLQLITVSRAVST
>V39RF-ADFV01106193.1-igkv |(68380, 68680)|2.9898400105|(0.998,1.000,0.992)|1
SRCDIQMTQSPSSLSASVGDRVTITCRASQGISNYLNWYQQKPGKAPKLLIYDASSLQSG
VPSRFSGSGSGTEFTLTISSLQPEDFAAYYCQQYKSYP
>V40RF-ADFV01106193.1-igkv |(80547, 80847)|2.91512906625|(0.995,0.959,0.969)|1
TTGEIVLTQSPATLSLSTRERATISCTASQSVSSYLAWYQQKPGQAPRLLIYYASSRATG
IPDRFSGSGSGTDFTLTISSLEPEDFAVYYCQQYKSFS
>V41RF-ADFV01106195.1-igkv |(6885, 7185)|2.97853608204|(0.995,0.999,0.985)|1
SRCDIQMTQSPSSLSASVGDRVTITCRASQGISSYLAWYQQKPGKAPELLIYAASTLQSG
VPSRFSGSGSGTEFTLTISSLQPEDFATYYCQQYNSYP
>V42RF-ADFV01106195.1-igkv |(45397, 45697)|2.95663465422|(0.993,0.969,0.997)|1
ARCDIQMTQSPSSLSASVGDRVTITCRASQGISKWLAWYQQKPGKAPKPLIYDASSLQSG
VPSRFSGSGSGTEFTLTISSLQPEDFATYYCQQYNSYP
>V43RF-ADFV01106195.1-igkv |(64645, 64945)|2.95459865717|(0.992,0.968,0.997)|1
ARCDIQMTQSPTSLSASVGDRVTITCRASQGISSWLAWYQQKPGKAPKLLIYKASSLESG
VPSRFSGSGSGTEFTLTISSLQPEDFATYYCQQYNSDP
>V44RF-ADFV01106195.1-igkv |(72488, 72803)|2.09069755945|(0.662,0.759,0.720)|1
CNGDIVLTQSPVSLAVSPGRMATITCRASESVSVLGMTNLIDWCQQKPGQPPKLLIYQAS
NKDTGVPARFSGSGSGTDFTLTINPVEADDAANDYCLQSKNFP
>V45RF-ADFV01126738.1-iglv |(7858, 8168)|2.75222261145|(0.961,0.870,0.954)|1
SLSQSVVTQPASLSASPGASARLTCTLRSGINVGSYRISWYQQKPGSPPQYLLNYYSDSD
KGQGSGVPSRFSGSKDASTNAGISLISGLQSEDEADYYCMI
>V46RF-ADFV01126738.1-iglv |(12674, 12983)|2.88055402908|(0.983,0.954,0.951)|1
SWAQSVLTQPSSVSGTPGQRVTISCSGSSSNIGSNNVYWYQQLPGTAPKLLIYDNNQRPS
GVPDRFSGSKSGTSASLAISGLQTEDEADYYCEAWDDSLSG
>V47RF-ADFV01126740.1-iglv |(9361, 9671)|2.54963349092|(0.940,0.774,0.940)|1
SLSQPVLTQPSSLSASPGASARLTCTFSGGIIVGGYHIFWYQQKPGSPPRYLLRYKSDSD
KHQGSGVPSRFSGSKDASANAGILLISGLQSEDEADYYCMI
>V48RF-ADFV01126741.1-iglv |(7037, 7346)|2.57216692337|(0.875,0.828,0.878)|1
SWAQSALTQPPSVSAAPGQKVTISCSGSRSDIGNYAVSWYQQLPGTAPKLLIYENNKRPS
GISDRFSGSKSGTSASLGVTGLQTGDEANYYCLAWDSSLSA
>V49RF-ADFV01126741.1-iglv |(12573, 12885)|2.55929044542|(0.948,0.770,0.961)|1
SWAQSVLTQPPSVSGSPGQRVTIFCTGSSSNIGEGYYVHWYQQLPGTAPKLLIYENNKRP
SGISDRFSGSKSGTSASLAIAGLQTGDEADYYCQSYDSSLSA
>V50RF-ADFV01126742.1-iglv |(25243, 25552)|2.85623134214|(0.971,0.954,0.937)|1
SWAQSVLTQPPSVSGTPGQRVTISCSGSSSNIGSNNVYWYQQLPGTAPKLLIYYNNQRPS
GVPDRFSGSKSGTLASLAITGLRSEDEADYYCEAWDDSLSG
>V51RF-ADFV01126755.1-iglv |(18501, 18804)|2.49451136239|(0.854,0.760,0.956)|1
SVASYELAQPSSVSVSPGQTARITCSGDVLAKKYAQWFQQKTGQSPVLLIYKDSERPSGI
PERFSGSSSGTTVTLTISGAQAEDEADYYCQSADSSGNH
>V52RF-ADFV01126756.1-iglv |(8462, 8772)|2.89647195752|(0.991,0.949,0.966)|1
SWAQSALTQPRSVSGSPGQSVTISCTGTSSDVGGYNYVSWYQQHPGTAPKLMIYDVSKRP
SGVSDRFSGSKSGNTASLTISGLQAEDEADYYCCSYASDDT
>V53RF-ADFV01126759.1-iglv |(52, 349)|2.51372272136|(0.858,0.817,0.846)|1
SVASYELIQPPSVSVSPGQTARITCSGDVLGENYADWYQQKPGQAPVLVIYKDSERPPGI
PERFSGCTSGNTATLTISRVLTEEEADYYCLSGDEDN
>V54RF-ADFV01126759.1-iglv |(7253, 7556)|2.84650257524|(0.977,0.930,0.951)|1
SATSYELTQPPSVSVAPGQTAKITCGGNNIGSKNVYWYQQKPGQAPVLVIYRDSNRPSGI
PERFSGSNSGNTATLTISAVEAGDEADYYCQVWDSTSDH
>V55RF-ADFV01126759.1-iglv |(16005, 16316)|2.55730254869|(0.984,0.801,0.916)|1
SVTSYELTQPRPVSVAPGQTARITCGGNDIGNKYVYWYQQKPGQAPVLVIYEDSNRPSGI
PERFSGSNSGNTATLTISAVEAGDEADYYCQVWDSSSKHDTV
>V56RF-ADFV01126760.1-iglv |(18689, 18992)|2.86820023281|(0.956,0.929,0.991)|1
SVASYELTQPPSVSVSPGQTAKITCSGDALPKKYAYWYQQKSGQTPVLIIYEDSKRPSGI
PERFSGSSSGTMATLTISGTQVEDEADYYCYSADSSGNH
>V57RF-ADFV01126760.1-iglv |(26179, 26490)|2.21450062476|(0.779,0.661,0.847)|1
SVASYELTQPLSVSVAPGQTARITCGGNNIGSKAVQWHQQKPGQAPVPVIYGNSNRPSGI
PERFSGSNSGNTATLIISGAQAGDEADYYCQVWDSSSKHHTV
>V58RF-ADFV01136575.1-ighv |(24647, 24950)|1.83032218041|(0.599,0.671,0.582)|1
KQWICVALSDQAVSVFAGVQCEVQLVESGGGLVQPGGSLRLSYAASGFTFSSSAMHWVRQ
ASGKGLEWVGYIRSKANSYTTAYAASVQGRFTISRDDSK
>V59RF-ADFV01136793.1-ighv |(1288, 1597)|2.49004470202|(0.861,0.816,0.826)|1
AHSKVQLVQSGTEVKKPGASVKVSCQDSGYTLTDYSKHWVRQTPGKGLQWMGGFDPVDGE
TVNSQKFQRRVTMTEDTSTDTAYMELSSLRSEDTAVYYCAT
>V60RF-ADFV01136793.1-ighv |(10260, 10566)|2.99199600001|(0.997,0.997,0.998)|1
VQCEVQLVESGGGLVQPGGSLRLSCVASGFTFSSYDMSWVRQAPGKGLEWVSYISSGGST
YYPDSVKGRFTISRDNAKNTLYLQMNSLRAEDTAVYYCAK
>V61RF-ADFV01138112.1-igkv |(5360, 5660)|2.9546404731|(0.994,0.982,0.980)|1
ARCDIQMTQSPSSLSASVGDKVTITCRASQGISNDLNWYQQKPGKAPKLLIYYASSLQSG
IPSRFSGSGSGTTYTLTISSLQPEDFATYYCQQGYSTP
>V62RF-ADFV01192032.1-trav |(8211, 8514)|2.16237938597|(0.893,0.884,0.629)|1
MYLVLGTTGQNIDQPTEMTATEGAIVQINCTYQTSGFNGLFWYQQHDGEAPTFLSYNVLD
GLEEKGHFSSFLSRSKGYSYLLLKKLQMKDSASYLCAVR
>V63RF-ADFV01192035.1-trav |(8555, 8856)|2.35214135581|(0.896,0.689,0.929)|1
GLRAQLVAQPEDQVTVAEGNPLTVKCTYSVSGNPYLFWYVQYPNQGLQFLLKYIAGDNLV
KGSYGFEAEFNKSQTSFYLKKPSALVSDSALYFCAVRD
>V64RF-ADFV01192035.1-trav |(53089, 53379)|2.65481331311|(0.883,0.852,0.934)|1
MNRGEDVEQSLFLGVREGDSSVINCTYTDSSSTYLYWYKQEPGAGLQLLTYIFSNMDLKQ
DQRLTVLLNKKDKHLSLRIADTQTGDSAIYFCAES
>V65RF-ADFV01192035.1-trav |(63802, 64090)|2.56078163705|(0.837,0.823,0.965)|1
VKSQKIEQNSEALNIQEGKTATLTCNYTNYSPAYLLWYRQDPGRGPVFLLLIRENEKEKR
KERLKVTFDTTLKQSLFHITASQPADSATYLCAL
>V66RF-ADFV01192035.1-trav |(73447, 73734)|2.53490743252|(0.858,0.791,0.918)|1
ANGEKQVEHSPHFLGSQQGDVASVSCMYSVSRFNNLQWYRQNTGMGPKHLLSMYSAGYEK
QKGRLNATLLKNGSSLYITAVQPEDSATYFCAVD
>V67RF-ADFV01192035.1-trav |(102005, 102299)|2.83328948337|(0.967,0.991,0.897)|1
GINGDSVVQTEGQVLLSEGDSLIVNCSYETTQYPSLFWYVQYPGEGPQLLLKAMKANDKG
RNKGFEATYHKETTSFHLEKDSVQEADSAVYFCALS
>V68RF-ADFV01192037.1-trav |(3179, 3470)|2.38278929256|(0.802,0.733,0.940)|1
GSCKNQVEQSPQSLIILEGKNCTLQCNYTVSPFNNLRWYKQDTGKGPVSLTIMTLSENTK
SNGRYTATLDADTKQSSLHITASQLSDSASYICVV
>V69RF-ADFV01192037.1-trav |(20251, 20539)|2.56662373226|(0.898,0.775,0.977)|1
VWSQRKEVEQDPGPFNVPEGATVAFNCTYSNSVSQSFFWYRQDCRKEPKLLMSVYSSGNE
DGRFTAQLNRASQYIYLLIRDSQLSDSATYLCAV
>V70RF-ADFV01192037.1-trav |(26000, 26297)|2.62687958378|(0.945,0.903,0.834)|1
GTRAQSVTQLDSHVSVSEGTPVLLRCNYSSSYSPSLFWYVQYPNQGLQLLLKYTSGTTLV
KGINGFEAEFKKSETSFHLTKSSAHVSDAAEYFCAVS
>V71RF-ADFV01192037.1-trav |(31699, 31996)|2.22758041091|(0.930,0.741,0.778)|1
TARAQSVTQPDIHITVSEGASLELRCNYSYGATPSLFWYVQSPGRGLQLLLKYFSGDTLV
QGIKGFEAEFQRSQSSFNLRKPSVHWSDAAEYFCAVS
>V72RF-ADFV01192038.1-trav |(2363, 2653)|1.90377307781|(0.894,0.848,0.549)|1
VNGENVEQHPSTLSVQEGESSVIKCTYSDSASNYFPWYKQELGKGPKLIIDIRSNVGEKK
DQRITVTLNKTAKHFSLHITEIQPGDSAVYFCAAS
>V73RF-ADFV01192038.1-trav |(22028, 22319)|2.59766088802|(0.935,0.784,0.971)|1
VWSQQKEVEQNSGPLSDPEGAIASLNCTYSDRSSQSFFWYRQYSGKSPELITSIYSNGDK
EDGRFTAQLNKASQYVSLLIRDSQLSDSATYLCAV
>V74RF-ADFV01192038.1-trav |(28540, 28837)|2.48602293162|(0.936,0.859,0.793)|1
GTRAQSVTQLDSHVSVSEGTLVLLRCNYSSSVSPNLFWYVQYPNQGLQLLLKYISGTTLV
KGINGFEAEFKKSETSFHLTKPSAHVSDAAEYFCAVS
>V75RF-ADFV01192038.1-trav |(50418, 50711)|2.59029036945|(0.947,0.826,0.888)|1
VSRGESVGLHLPTLSVQEGNNSVINCAYSDSASDYFTWYKQESGKGPQFIIDIRSNMDKR
QGQRVTVLLNKTVKHLSLQIAATQPGDSAVYFCAEN
>V76RF-ADFV01192039.1-trav |(5009, 5312)|2.62285150156|(0.909,0.811,0.946)|1
PGIAQKIIQTQPAMFVQEKEAVTLDCTYDTSDQSYGLFWYKQPSSGEMIFLISQASYDKQ
NATEGRYSLNFQKARKSANLVISASQLGDSAKYFCAMRE
>V77RF-ADFV01192039.1-trav |(24309, 24603)|2.76193938112|(0.921,0.888,0.965)|1
RTHGDSVTQMEGPVTLSEEAFLTINCTYTATGYPTLFWYVQYPGEGPQLLLKATRADDKG
SNKGFEATYRKETTSFHLEKDSVQESDSAVYFCALS
>V78RF-ADFV01192039.1-trav |(50026, 50319)|2.58214489407|(0.830,0.873,0.915)|1
VWCQQKEVEQNPGPLSVPEGAIASLNCTYSNSAFQYFMWYRQYSRKGPELLMYTYSSGNK
EDGRFTAQVDKSSKCISLFIRNSQPSDSATYLCAMS
>V79RF-ADFV01192039.1-trav |(63753, 64050)|2.15199584857|(0.958,0.854,0.668)|1
GTRAQSVTQLDSQVPVFEEGPVELRCNYSSSVSVYLFWYVQYPNQGLQLLLKYTSGPTLV
KGINGFEAEFKKSETSFHLRKPSAHISDAAEYFCAVS
>V80RF-ADFV01192039.1-trav |(82783, 83070)|2.64322519241|(0.881,0.848,0.927)|1
VNSQQGEEDPQALTIQEGENATMNCSYKSSTNSLQWYRQESGRGLVHLILIRSNEREKHS
GRLRVTLDTSKKSSSLLITASRAADTASYFCAME
>V81RF-ADFV01192039.1-trav |(88347, 88638)|2.69323355494|(0.891,0.912,0.892)|1
RTNGDSVTQTEGPVTLPEQAALTLNCTYQSSYSTFLFWYVQYLNKAPELLLKSSENQETD
SRGFQASHVKSDSSFHLEKPSVQLSDSAVYYCALR
>V82RF-ADFV01192039.1-trdv |(91529, 91832)|2.04325144747|(0.761,0.711,0.639)|1
SSMTQKVTQAQTEISVVEKEDVTLDCVYESRDTTYYLFWYKQLPSGELVFLIRQNSFNEQ
NEINGRYSWNFQKSTSSFNLTITASQVMDSAVYFCALND
>V83RF-ADFV01192040.1-trav |(2622, 2909)|2.1843667918|(0.812,0.689,0.755)|1
LSGEDQVTQSPEALRLQEGENSSLICSYTVSNLRGLLWYRQDPGKGPEFLFILYSAGEEK
EKERLKATLTKEESFLHITAPKPEDSATYLCAVQ
>V84RF-ADFV01192040.1-trav |(15508, 15807)|2.05794000824|(0.793,0.578,0.903)|1
VSSKQEVTQIPAALSVPEGDNLVLNCSFTDSAIYNLQWFRQDPGKGLTSLLIIQSSQREQ
TSGRLNASLDKSSGRSTLYIAASQPGDSATYLCAVRHS
>V85RF-ADFV01192042.1-trav |(5847, 6144)|1.75936032245|(0.770,0.578,0.627)|1
VRGIQVEQSPPDLILQEGANSTLRCNFSATVNNLQWFHQNPWGQLINLFYIPSGTKQNGR
LSATTVTTERYSLLYISSSQTTDSGVYFCAVEPQCSP
>V86RF-ADFV01192042.1-trav |(20734, 21049)|1.98460466943|(0.757,0.556,0.875)|1
GVSGQQKEKSDQQQVKQSPQSLIVQKGGISIINCAYENSAFDYFPWYRQFSGKGPALLIA
IRSVVNEKEERRFKIFLNKSAKHFSLHIMDSQPGDSATYFCAA
>V87RF-ADFV01192042.1-trav |(28970, 29270)|2.04407371615|(0.704,0.640,0.717)|1
SSVAQEVTQAQSSVSMPVGKAVTLNCLYETSSWSYYIFWYKQLPSKEMILLIRQGSAEQN
AKNGRYSVNFKKAANSIALTISALRLEDSAKYFCALGE
>V88RF-ADFV01192042.1-trav |(37852, 38142)|1.76198418869|(0.853,0.560,0.714)|1
VSSVLNVEQSPQSLHVQEGDSTNFTCSFPSSNFYALHWYKWETAKSPKALFVMNLNGDEK
KKGRINATLNTKEGYSYLYIKGSQPEDSATYLCAF
>V89RF-ADFV01192042.1-trav |(45516, 45815)|2.07354388784|(0.838,0.769,0.636)|1
VNGQQIMQIPQCQHVQEGEDFTTYCNSSTTLSNIQWYKQRPGGHPVFLIQLVKSGEVKKQ
KRLTFQFGEAKKNSSLHITATQTTDVGTYFCAGHSAPQ
>V90RF-ADFV01192042.1-trav |(56528, 56818)|2.54927037078|(0.825,0.865,0.876)|1
TIIDAKTTQPTSMDCAEGRAANLPCNHSTISGNEYVYWYRQIHSQGPQYIIHGLKNNATN
EMASLIITEDRKSSTLILPHATLRDTAVYYCIVRV
>V91RF-ADFV01192042.1-trav |(66292, 66589)|1.81658781728|(0.730,0.546,0.678)|1
GTRAQSVTQLDGHIIVSEEAPLELKCNYSYSGVPSLFWYVQYPSQSLQLLLKDLTEATQV
KGIKGFEAEFKKSETSFYLRKPSAHVSDAAEYFCAAG
>V92RF-ADFV01192042.1-trav |(77809, 78096)|2.15918094881|(0.832,0.841,0.633)|1
VSTQQLEQSPRFLSIQEGENLTVYCNSSTPVFSSLQWYRQDPGEGPVLLVTVVTGGEVKK
LKRLTFQFGDARKDSSLHITAAQPGDTGLYRCAG
>V93RF-ADFV01192042.1-trav |(83063, 83387)|2.32070647145|(0.799,0.698,0.932)|1
VNSQQKNDDQQVKQNLPSLSVQEGRISILNCDYTNSMFDYFLWYKKYPAEGPTFLISIRS
TEDKNEDGRFTVFLNKSAKHLSLHIVASQPGDSAVYLCAASAQCSP
>V94RF-ADFV01192042.1-trav |(88222, 88509)|2.2156897515|(0.811,0.641,0.916)|1
VRSQQPVQSPEAVILREGEDAIINCNSSKVLYSVHWYRQKRGEAPVFLMILLKGGEQKSH
DKISATFNEKKQQSSLYLVASQLSYSGTYFCGAE
>V95RF-ADFV01192042.1-trav |(97069, 97372)|1.9177741749|(0.681,0.559,0.874)|1
SSMSQRVIQSQPAISTQEGETVKLDCSFKTNIVYYILYWYKRPPNEKIIFLIYQQTDADT
NATQGQYSVSFQKATETIQLIISSSQPEDSATYFCCLKE
>V96RF-ADFV01192045.1-trav |(9669, 9956)|1.8265270439|(0.575,0.673,0.801)|1
VGSQELEQSRQSLIVEEGKNLTIKCMSSKTLYGLYWYKQNYGEGLIFLMMLQKGGEEKSH
EKITAKLDEKKQQSSMHITASEPSHAGIYLCGAD
>V97RF-ADFV01192045.1-trav |(29460, 29750)|2.27482538786|(0.766,0.899,0.697)|1
VSSEDKVVQSPLSLVVHEGDTVTLNCSYEVTNFRSLLWYKQEKKAPTFLFMLTSSGIEKK
SGRLSGILDNRELFSILNITATETRDSAIYLCAVE
>V98RF-ADFV01192049.1-trav |(617, 918)|2.45223358214|(0.860,0.874,0.759)|1
SGMAQTVTQSQPEMSVQEAETVTLSCTYDTTESDYYLFWYKLPPSRQMILIIRQEAYKQQ
NATENHFSVNFQKAAKSFSLKISDSQLGDTAMYFCAFM
>V99RF-ADFV01192049.1-trav |(9724, 10024)|2.65379518103|(0.945,0.907,0.846)|1
FSMAQTVTQSQPEMSVQEAETVTLSCTYDTTESDYYLFWYKQPPSRQMILIIRQEAYKQQ
NATENRFSVNFQKAAKSFSLKISDSQLGDTAMYFCAYR
>V100RF-ADFV01192050.1-trav |(14951, 15239)|2.37491687132|(0.781,0.755,0.952)|1
LSGELKVGQNPPFLSTQEGKNYTIYCNYSTISDRLYWYRQDPGKSLESLFVLLSSGAVKQ
EGRLMASLDTKARLSTLHITAAVHDLSATYFCAV
>V101RF-ADFV01192052.1-trav |(11470, 11756)|1.93029184308|(0.621,0.665,0.867)|1
VSDAKNEVEQSPQDLTAQEGEFITINCSYSIGITALQWLQQHQGGGIVSLFMLSSGKKKN
GRLMATINIQEKHSSLHITASQPRDSAIYICAV
>V102RF-ADFV01046571.1-trgv |(4061, 4374)|2.57932803728|(0.923,0.891,0.815)|-1
SQKSSNLEGRTKSVTRPTGSSAEITCDLTVTDTFYIHWYLHQEGKAPQRLLYYDVSDSRD
VLESGLSQVKYYTHTPRRWSWILILRNLIENDSGVYYCASWG
>V103RF-ADFV01046571.1-trgv |(18717, 19017)|1.64901498263|(0.739,0.591,0.544)|-1
SQKSFNLEGRTKSVTGPTGSLAVITCDLPVENAVYIHWYLHQEGKAPRRLLYYVFSTSKV
VLESGISLGKYHTYASTRRSFKFILENLIEHDSGVYYC
>V104RF-ADFV01046573.1-trgv |(27483, 27793)|2.17620512795|(0.939,0.736,0.766)|-1
SQKSSNLEGRTKSVTRPTGSSAEITCDLPGASTLYIHWYLHQEGKAPQRLLYYEPYYFRV
VLESGITPGKYDTASTRSSWNLRLQNLIEKDSGVYYCATWD
>V105RF-ADFV01062096.1-trbv |(8832, 9126)|2.02022545415|(0.766,0.747,0.606)|-1
VRSQTIHQWPATLVQPVGSPLSLECTVEGTSNPNLYWYRQAAGRGLQLLFYSIGVDQISS
EVPQNLSASRPQDRQFILSSKKLLLSDSGFYLCAWS
>V106RF-ADFV01106195.1-igkv |(132520, 132838)|2.41969459323|(0.990,0.707,0.997)|-1
AYGDIVMTQSPDSLAVSLGERVTINCKSSQSVLYSSNNKNYLNWYQQKPGQAPKLLIYWA
STRESGVPDRFSGSGSGTDFTLTISSLQAEDVAVYYCQQSYSTP
>V107RF-ADFV01106214.1-igkv |(93146, 93461)|2.60425075856|(0.971,0.791,0.964)|-1
TSGDIVMTQTPLSLPVTPGEPTSISCRSSQSLLHSDGCTYLAWYLQKPGQSPQLLIYAVS
YRASGVPDRFSGSGSGTDFTLKISRVEAEDVGVYYCMQALQAP
>V108RF-ADFV01106214.1-igkv |(102002, 102302)|2.96804987297|(0.998,0.996,0.976)|-1
ARCDIQMTQSPSSLSASVGDSVTITCRASQGISNWLAWYQQKPGKAPKLLIYKASSLQSG
IPSRFSGSGSGTTYTLTISSLQPEDFATYYCQQSYSTP
>V109RF-ADFV01131933.1-ighv |(14064, 14373)|2.91537797317|(0.990,0.941,0.994)|-1
AHSQVQLVQSGAEVKKPGASVKVSCKASGYTFTSYNMYWVRQAPGQGLEWMGVINPSSGG
TSYAQKFQGRVTMTRDTSISTAYMELSSLRSEDTATYYCAR
>V110RF-ADFV01131938.1-ighv |(1713, 2037)|2.83302424945|(0.953,0.957,0.926)|-1
AHSQVQLVQSGAEVKKPGTSVKVSCKASGYTFTSYAMNWARQAPGQRLEWMGWINTNTGN
PTYAQGFKERFVFSMDTSVSTAYLQISSLKAEDTAVYYCARDTVWK
>V111RF-ADFV01131939.1-ighv |(1427, 1751)|2.83302424945|(0.953,0.957,0.926)|-1
AHSQVQLVQSGAEVKKPGTSVKVSCKASGYTFTSYAMNWARQAPGQRLEWMGWINTNTGN
PTYAQGFKERFVFSMDTSVSTAYLQISSLKAEDTAVYYCARDTVWK
>V112RF-ADFV01131940.1-ighv |(4183, 4492)|2.98360007999|(0.998,0.998,0.988)|-1
VQCDVQLVESGGGLAQPGGSLRLSCAASGFTFSNYYMSWVRQAPGKGLEWVSYISGDSSY
IYYADSVKGRFTISRDNAKNSLYLQMNSLRAEDTAVYYCTR
>V113RF-ADFV01131940.1-ighv |(12421, 12735)|2.70923358214|(0.955,0.854,0.941)|-1
VLSQVTLKESGPTLVKPTQTLTLTCTFSGFSLSTSGVGVGWIRQPPGKALEWLARIDWDD
DKYYSTSLKTRLTISKDTSKNQVVLTMTNMDPVDTATYYCARR
>V114RF-ADFV01131940.1-ighv |(27838, 28144)|2.6034035275|(0.970,0.995,0.778)|-1
VLSQVQLQESGPGLVKPSETLSLTCAVSGGSISGYYWSWIRQPPGKGLEWIGSIDSSGSK
YLNPSLKSRVTMSADTSKNQFSLKLSSVTAADTAVYYCAR
>V115RF-ADFV01131944.1-ighv |(5787, 6101)|2.97291252616|(0.998,0.982,0.994)|-1
VQCAVQLVESGGGLVQPGGSLRLSCAASGFTFSDYYMSWVRQAPGKGLEWVAVIRNKANG
GTTEYAASVKGRFTISRDDSKSIAYLQMNSLKTEDTAVYYCAE
>V116RF-ADFV01131946.1-ighv |(2041, 2350)|2.90834245428|(0.985,0.996,0.937)|-1
AHSEVQLVQSGAEVKKPGATVKISCKVSGYTFTSYYMHWVQQAPGKGLEWMGGVDPEGGE
TIYAEKFQGRVTITADTSTDTAYMELSSLRSEDTAVYYCAR
>V117RF-ADFV01131948.1-ighv |(1585, 1907)|2.64166538267|(0.954,0.831,0.920)|-1
VLSQVTLKESGPALVKPTETLTLTCTVSGFSLSTSGMGMSWIRQPPGKALEWLAHIFSND
QKSYSTSLKSRLTISKDTSKSQVVLAMTNMDPVDTATYYCARRAQ
>V118RF-ADFV01131950.1-ighv |(11086, 11386)|2.99285201038|(1.000,0.994,0.999)|-1
QCEVQLVESGGSLVQPGGSLRLSCAASGFTFSDYYMHWVRQAPGKGLEWVSEITNSSTYY
ADSVKGRFTISRDNAKNTLYLQMNSLRAEDTAVYYCAK
>V119RF-ADFV01131950.1-ighv |(21617, 21923)|2.98361205453|(0.999,0.995,0.990)|-1
VLSQVQLQESGPGLVKPSETLSLTCAVSGGSISGYYWSWIRQPPGKGLEWIGYIYSSGST
NYNPSLKSRVTMSVDTSKNQFSLKLSSVTAEDTAVYYCAR
>V120RF-ADFV01131951.1-ighv |(9601, 9910)|2.99498400013|(0.999,0.997,0.999)|-1
VQCEVQLVESGGGLVQPGGSLRLSCAASGFTFSSYDMNWVRQAPGKGLEWVSYISSGGGT
IYYADSVKGRFTISRDNAKNSLYLQMNSLRAEDTAVYYCAK
>V121RF-ADFV01131951.1-ighv |(17955, 18261)|2.73266921701|(0.958,0.915,0.887)|-1
VLSQVQLQQWSAGPVKPSETLSLTCAVYGGSISGYYWGWIRQPPGKGLEWIGLIDSSGST
NYNPSLRSRVTMSVDTSKNQFSLKLSSVTAADTAVYYCAR
>V122RF-ADFV01131954.1-ighv |(4903, 5218)|2.96526014987|(0.995,0.984,0.987)|-1
VQCEVQLVESGGGLVQPGGSLRLSCAASGFTFSDYAMSWVRQAPGKGLEWVGFIRSKAYG
GTTEYAASVKGRFTISRDDSKSVAYLQMNSLKTEDTAVYYCTR
>V123RF-ADFV01131956.1-ighv |(7476, 7785)|2.98340816598|(0.998,0.986,1.000)|-1
VQCEVQLVESGGGLVQPGASLKLSCAASGFTFSSYGMHWVRQAPGKGLEWVSSISTSSSY
IYYADSVKGRFTISRDNSKNTLYLQMNSLRAEDTAVYYCAR
>V124RF-ADFV01131956.1-ighv |(12171, 12475)|2.38552553033|(0.968,0.987,0.693)|-1
CAEVQLVQSGAEVKRPGESLRISCKGSGYSFTSYWISWVRQMPGKGLEWMGMIYPSDSDT
RYSPSFQGHVTISADKSISTAYLQWSSLKASDTATYYCA
>V125RF-ADFV01131957.1-ighv |(4591, 4897)|2.80936248136|(0.971,0.889,0.976)|-1
VLSQVQLQESGPGLVKLSETLSLTCAVSGGSISGYYWSWIGQPAGKGLEWIGYIHSSGST
NYNPSLKSRVTMSADTSKNQFSLKLSSVTAEDTAVYYCAR
>V126RF-ADFV01131958.1-ighv |(4025, 4334)|2.88493377978|(0.995,0.937,0.969)|-1
AHSQVQLVQSGPEVKKPGASVKVSCKASGYTFTSSAMQWVRQAPGQGLEWMGWIIVGNGN
TNYAQKFQGRVTITRDTSTSTAYMELSSLRSEDTAVYYCAT
>V127RF-ADFV01131959.1-ighv |(269, 578)|2.82214049268|(0.991,0.962,0.903)|-1
AHSEVQLVQSGAEVKKPGATVKISCKASGYTFTSSYMHWVQQAPGKGLEWMGRVDPEDGE
TKYAEKFQGRVTITADTSTDTAYMELSSLRSEDTAVYYCAT
>V128RF-ADFV01131961.1-ighv |(38, 353)|2.96011631225|(0.990,0.995,0.976)|-1
VQCEVQLVESGGGLVQPGGSLRLSCAASGFTFSNYWMHSVRQAPGKGLEWVGRIKNKADG
GTAEYAASVKGRFTISRDDSKNTLYLQMNSLKTEDTAVYYCTR
>V129RF-ADFV01131961.1-ighv |(8796, 9087)|2.07899451941|(0.987,0.581,0.994)|-1
AAVESGGGLVQPGGSLRLSCVASGFTFSNYAMGWVRQAPGKGLEWVSSISGSGSTYYPDS
VKGRFTISRDNAKNTLYLQMNSLRAEDTAVYYCAK
>V130RF-ADFV01131961.1-ighv |(20094, 20382)|1.87168552374|(0.623,0.791,0.574)|-1
VQCEVQLVESGGGLVQPGGSLRLSCAASGFTFSNNYMHWVRQAPGKGLEWVGLIRNKADG
GTTDYAASVKGRFTISRDDSKSIAYLQMNSLKTE
>V131RF-ADFV01131961.1-ighv |(37937, 38246)|2.98145211916|(0.999,0.995,0.988)|-1
VQCEVQLVESGGGLVQPGGSLRLSCAASGFTFSSYGMNWVRQAPGKGLEWVSYISSGGGT
IYYADSVKGRFTISRDNAKNSLYLQMNSLRAEDTAVYYCTR
>V132RF-ADFV01131961.1-ighv |(48794, 49103)|2.82862014931|(0.967,0.995,0.892)|-1
VQSQVQLVQSGAEVKKPGSSVKVSCKASGGTFSSYAISWVRQAPGQGLEWMGVIIPAADL
TNYAQKFQGRLTITADTSTSTAYMELSSLRSEDTAVYYCAR
>V133RF-ADFV01132915.1-iglv |(43582, 43891)|2.18417319231|(0.912,0.631,0.912)|-1
SWANFMLTQPHSVSGSVGQKVVISCARSSGSIGSYYVQWYQQRSGSAPTTVIYKDNQRPT
GAPDRFSGSIDSSSNSASLTISGLETEDEADYYCQSYDSSN
>V134RF-ADFV01132915.1-iglv |(63292, 63599)|1.93091694601|(0.796,0.544,0.817)|-1
SVVQAGLTQAPSVSKGLRQTATLTCTGNSNNVGNEGAAWLQQHQGHPPKLLSYRNNNRPS
GISERFSASRSGNTASLTITGLQPEDEADYYCSAWDSSLR
>V135RF-ADFV01132915.1-iglv |(73010, 73322)|2.12899770786|(0.942,0.823,0.672)|-1
SWAEVVFTQPHSVSGSPGQTVTISCTRSSGSIASRYVHWYQQRPGSAPTTVIYDDVPRPS
GVPDRFSGSIDSSSNSASLTISGLKSEDEADYYCQSADDSYN
>V136RF-ADFV01132915.1-iglv |(82179, 82483)|1.85581768872|(0.801,0.689,0.585)|-1
SWAQSVLTQEASVSGTVGQKVTLSCTGNSNNVGTYTVGWYKQISHGAPKTVMLGNSRPSG
IPDRFSGSKSGTTASLTISGLQPEDEADYYCSTWDYSLN
>V137RF-ADFV01132915.1-iglv |(87286, 87596)|2.50156872257|(0.914,0.784,0.875)|-1
SLSQPVLTQSPSASASPGASVKLTCTLSSGHSSYTIAWHQQQPEKAPRYLMKLSSDGSHS
KGDGIPDRFSGSSSGAERYLTISNLQSEDEADYYCQTWGSG
>V138RF-ADFV01132915.1-iglv |(116005, 116315)|2.56134948626|(0.866,0.892,0.816)|-1
SWAEVVFTQPHSVSGSPGQTVTISCTRSSGSIASNYVHWYQQRPDSAPTTVIYSDDQRPS
GVPDPFSGSIDSSSNSASLTISGLKSEDEADYYCQSYDSSS
>V139RF-ADFV01132918.1-iglv |(45140, 45460)|1.79898378474|(0.807,0.527,0.748)|-1
SPGASARLTCALSSGINVGSYRISWYQQKPGSPPRYLLNYYSDSDKGQGSGVPSRFSGSK
DASTNAGILLISGLQSEDEADYYCMIWHSSASHSDTHRWGTGTKT
>V140RF-ADFV01132918.1-iglv |(49559, 49868)|2.59310449268|(0.828,0.886,0.954)|-1
SWAQSVLTQPPSVSGTPGQRVTISCSGSSSNIGSNNVHWDQQLPGTAPKLLIYYNDQRPS
GVPDRFSGSKSGTSASLAITGLRSEDEADYYCEAWDDSLSG
>V141RF-ADFV01132961.1-igkv |(18470, 18770)|2.91096483513|(0.987,0.945,0.986)|-1
ARCDIQMTQSPSSLSVSVGDRVTITCRASQGISNELAWYQQKPGQAPMLLIYAASSLQTG
VPSRFSGSGSGTDYTLTISSLQPEDVATYYCLQDYTTP
>V142RF-ADFV01132961.1-igkv |(54096, 54396)|2.48807859003|(0.903,0.883,0.771)|-1
ATCDIQMTQSPSSLSASVGDRVTITCRASQGINNELAWYQQKPWKDPKLLIYSASNLLMG
VPSQFSGSGPGTDYTLTISSLQPEDAATYYCQWDYNTP
>V143RF-ADFV01132961.1-igkv |(60834, 61149)|2.0952123367|(0.984,0.700,0.806)|-1
SSGDIVMTQTPLSLPFTPGEAASISCRSSQSLLDSDGYTYLDWYLQKPGQSPQLLIYAVS
NRASGVPDRFSGSGSGTDFTLKISRVEAEDVGVYYCLQALQAP
>V144RF-ADFV01132961.1-igkv |(93218, 93536)|2.70626597494|(0.933,0.846,0.960)|-1
STGDIVMTQTPLFLSITLGEPASISCRSSQSLFYSDDQNIYLDWYLQKPGQSPQLLIYFV
SYRASGVPDRFSGSGSGTDFILKISRLEAEDVGVYYCMQRIEFP
>V145RF-ADFV01132961.1-igkv |(104510, 104810)|2.94655466254|(0.993,0.987,0.969)|-1
ARCDMQMTQSPSSLSASVGDTVTITCRASQSISSYLNWYQQKPGKIPKLLIYAASTLQSG
VPSRFSGSGSGTDFTVTISSVQPEDFATYYCQHGYGTP
>V146RF-ADFV01132961.1-igkv |(136569, 136884)|1.86020686464|(0.939,0.530,0.889)|-1
SSADIVMTQTPLPLPITLGEPASISCKSSQSLLHSNGNTYLYWYLQKPGPSPQLLIYRVS
NRASGVPDRFSGSGSGTDFTLKISRVEAEDVGVYYCMQGIQLP
>V147RF-ADFV01132961.1-igkv |(146778, 147093)|2.91908850952|(0.992,0.957,0.976)|-1
SSGDIVMTQTPLSLSITPGEPASISCRSSQSLRYSDGNTYLYWYLQKPGQSPQLLIYRVS
NRFSGVPDRFSGSGSGTDFTLKISRVEAEDVGVYYCMQDLQAP
>V148RF-ADFV01132961.1-igkv |(157570, 157870)|2.90427538434|(0.951,0.979,0.981)|-1
ARCAIQMTQSPSSLSASVGDRVTITCRTSQGISNWIAWYQQKPGKAPKHLIYGASNLQTG
VPSRFSESGSGTDYTLTVSSLQPEDSTTYYCQQYDIFP
>V149RF-ADFV01132961.1-igkv |(167109, 167423)|2.26420479112|(0.981,0.727,0.850)|-1
SSGDVVMTQTPLSLPVTPGEPASISCRSSQSLLHSNGNTYLHWYLQKPGQSPQLLIYKVS
NRASEIPDRFSGSGSGTDFTLKISRVEAEDVGVYYCMQSTKVS
>V150RF-ADFV01132961.1-igkv |(188116, 188416)|2.90257012931|(0.990,0.994,0.932)|-1
IRCAIQMTQSPSSLSASVGDRVTITCRASQGISNYLNWYQQKPGKAPKLLIYRASSLETG
VPSRFSGSGSGTDFALTISSLQPEDIATYYCLQYDNLP
>V151RF-ADFV01132961.1-igkv |(214992, 215307)|1.90129963757|(0.880,0.613,0.736)|-1
SSGDVVMTQSPLSLPVTPGQPASISCRSSQSLVHSDGKTYLYWFQQRPGQPPRRLIYQVS
NRDSGVPDRFIGSGAGTDFTLKISRVEAEDVGVYYCMQGTQFP
>V152RF-ADFV01132961.1-igkv |(225521, 225836)|2.64494787791|(0.975,0.849,0.903)|-1
SSGDIVMTQTPLSLSITPGEPASISCRSSQSLRHSNGYTYLDWYLQKPGQSPQLLIYLGS
NRASGVPDRFSGSGSGTDFTLKISRVEAEDVGIYYCMQGIQLP
>V153RF-ADFV01132961.1-igkv |(238675, 238990)|2.3185270439|(0.955,0.729,0.857)|-1
SSGNIVLTQSPLSLPVTPGEPASISCRSSQSLLHSNGYNYLYWYLQKPGQSPQLLIYLGS
NRASGVPDRFSGSGSGTDFTLKISRVKAEDVGVYYCMQTLQTP
>V154RF-ADFV01132961.1-igkv |(246969, 247267)|2.79823918747|(0.962,0.944,0.906)|-1
TRCDIQMTQSPSSLSASVGDRVTITCRASQSISKWLAWYQQKPGKVPKLLIYAASTLQSG
VPSRLSGSGSGTDFTLTISSLQPEDVATYYCQKHDSA
>V155RF-ADFV01132961.1-igkv |(265341, 265656)|1.80519938791|(0.917,0.650,0.683)|-1
SSGDIVMTQTPLSLPVTPGQPASISCRSSQSLVHSNGNTYLNWIQQRLGQPPRLLIYKVS
NRASGVPERFSGSGAGTDFTLKISRVEAEDVGVYYCLQGTQFP
>V156RF-ADFV01141314.1-igkv |(3398, 3721)|1.8590988562|(0.925,0.541,0.857)|-1
TSGDIVMTQTPHSLPVTPGEPASISCGSSQSPLHSNGYTYLYWYLQKPGQSPQLLIYAVS
NRASGFPDRFSGSGSGTDFTLKMSRVEAEDVGVYYCMQALQAPPTV
>V157RF-ADFV01143437.1-ighv |(651, 966)|2.92304630182|(0.993,1.000,0.941)|-1
VQCEVQLVESGGSLVQPGGSLRLSCAASGFTFSDYYMHWVRQAPGKGLEWVGRIKNKAGG
GTAEYAASVKGRFTISRDDSKNTLYLQMNSLKTEDTAVYYCTR
>V158RF-ADFV01143437.1-ighv |(3728, 4035)|2.09313317598|(0.880,0.610,0.858)|-1
WGRLIKALGGSLRLSCAASGFTFSSYAMHWVRQAPGKGLEWVSVISTSGGTILYTDSVKG
RFTVSRDNAQNSLYLQMNSLRAEDTAVYYCVKDTVSRSQC
>V159RF-ADFV01192057.1-trdv |(25030, 25336)|1.89175205331|(0.627,0.590,0.824)|-1
RGMLCDKVTQSSPDQTVASGSEVVLLCTYDTVYSNPDLFWFRIRPDYSFQFVFYGDDSRS
QAADFTQGRFSVKHILTQKAFHLVISPVRIEDSATYYCAL
>V0RF-JYKQ01003190.1-trgv |(993, 1290)|1.77544900682|(0.769,0.588,0.623)|1
SQKSSNLEGKTKSITGPTGSPAEITCDLPGVSTLYIHWYLHQEGKAPQRLLYYEPYYFTV
VLESGISPGKYDTASTRKSWNLRLQNLIENDSGIYYC
>V1RF-JYKQ01003191.1-trgv |(1259, 1575)|2.37087453346|(0.904,0.859,0.730)|1
SQKSSNLEGRTKSVTRPTGSSAEITCDLPEVSSFYIHWYLHQEGKAPQRLLYYDSSNSRV
VLESGISSGKYDSYGSTRRRNLRLRLQNLIENDSGVYYCANWD
>V2RF-JYKQ01003191.1-trgv |(5603, 5916)|2.36723203636|(0.915,0.715,0.888)|1
GQKSSNLEGITKSVTRPTGSSAEITCDFSGDSNFYIHWYLHQEGKVPQRLLYYDVSNSRD
VLESGLSPGKYYTHTRTRWSWILILRNLIENDSGVYYCANWD
>V3RF-JYKQ01005758.1-ighv |(2900, 3215)|2.8019608028|(0.950,0.896,0.969)|1
VKCEAQLMESGGGLVQPGGSLRLSCAASGFTFSSYGMSWVHQTPGKGLEWVGLIRNKADG
ETTDYAASVKGRVTISRDDSKSITSLQMNNLKTEDTAVYYCAR
>V4RF-JYKQ01005763.1-ighv |(2160, 2469)|2.56835707582|(0.953,0.910,0.801)|1
VQCEVQLVESGGGLVQPGASLRLCCAASGFTFSSTRMNWIRQSPGKKLEWVADIKYDGSE
KYYVDSVKGRFTISRDNAKNSLYLQMNSLRAEDTAVYYCVR
>V5RF-JYKQ01005763.1-ighv |(9395, 9701)|2.15805457972|(0.941,0.964,0.610)|1
VCAEVQLVQSGEVKRPGESLRISCKTSGYSFTSSWISWVRQMPGKGLEWMGMIYPGDSDT
RYSPSFQGHVTISADKSISTVHLQWSSLKASDTATYYCAK
>V6RF-JYKQ01005769.1-ighv |(5096, 5411)|2.69782915948|(0.858,0.999,0.952)|1
VQCEVQLVESGGGLAQPGGSLRLSCAASGFTFSDHYMDWVRQAPGKGLEWVGRIRNKANG
YTTEYAASVKGRFTISRDDSKNTLYLQMSSMKTEDTAVYHCAR
>V7RF-JYKQ01005770.1-ighv |(7257, 7566)|2.93564868712|(0.987,0.980,0.970)|1
VQCEVQLVESGGGLVQPGRSLRLSCATSGFTFSNYWMFWVRQAPGKGLEWVSSISGSSSS
TYYPDSVKGRFTISRDNAKNMLYLQMNSLRAEDTAVYYCAR
>V8RF-JYKQ01005771.1-ighv |(8999, 9305)|2.28224635327|(0.745,0.729,0.891)|1
VQCEVQLVEYGGGLVQRGGSLRLSCGFTFSVHFMSWVHQAPAKGLEWVGFMRNKANGGTT
EYATSVKGRSTISRADSKSMASLQMSSLNTEDTAVYYCAR
>V9RF-JYKQ01005772.1-ighv |(16443, 16752)|2.73110613833|(0.954,0.997,0.839)|1
VQCEVQLVESGGGLVQPGGSLRLSCAASGFTFSNYWMNWVRQAPGKGLEWVARIKSKADG
ETANYAASVKGRFTISRDDSKNTLYLQMNSLKTEETAVYYC
>V10RF-JYKQ01005772.1-ighv |(36472, 36781)|2.80487328526|(0.984,0.883,0.978)|1
VQGEVQLVESGGGLAKPGGSLRLSCAASGFTFSSYWMHWVRQAPGKGLEWISAINSAGSS
IYYADSVKGRFTISRENAKNTLYLQMNSLRAEDTAVYYCAK
>V11RF-JYKQ01005773.1-ighv |(3691, 4000)|2.11979057903|(0.894,0.889,0.611)|1
VQCEVQLVESGGGSIQPGASLRLCCAAPGFTFSSTRMNWIRQAPGKKLEWVADIKYDGSE
KYYVDSVKGRFTISRDNAKNSLSLQMNSLRAEDTAVYYCVR
>V12RF-JYKQ01005773.1-ighv |(11323, 11632)|2.6468563865|(0.923,0.974,0.810)|1
VCAEVQLVQSGAEVKRPGESLRISCKTSGYSFTSNWISWVRQMPGKGLEWMGMIDPSDSD
TRYSPSFQGQVTISADKSISTTYLQWSSLKASDSATYYCAK
>V13RF-JYKQ01005774.1-ighv |(1632, 1941)|2.6468563865|(0.923,0.974,0.810)|1
VCAEVQLVQSGAEVKRPGESLRISCKTSGYSFTSNWISWVRQMPGKGLEWMGMIDPSDSD
TRYSPSFQGQVTISADKSISTTYLQWSSLKASDSATYYCAK
>V14RF-JYKQ01005774.1-ighv |(20410, 20718)|2.59573596175|(0.948,0.826,0.892)|1
VQGGVQLVESEGNFVQPGGSLRLSCAVSGFTFSSYDLDWIRHAPGKGLEWVSGISIAGST
YYANSVKGRFAISIDNAKNTLYLQMNSLIAEDTAIYYCVSE
>V15RF-JYKQ01005774.1-ighv |(31522, 31837)|2.96180866856|(0.981,0.998,0.984)|1
VQCEVQLVESGGGLVQPGGSLRLSCAASGFTFSNYWMNWVRQAPGKGLEWVGFIKNKADG
GTAAYAESVKGRFTISRDDSKNTLYLQMNSLKTEDTAVYYCTR
>V16RF-JYKQ01005777.1-ighv |(21925, 22238)|2.80923420725|(0.925,0.983,0.915)|1
VQCEVQLVESRGGLVQPGGSLRLSCAASGFTFSDYYMHWVRQAQGKGLEWVGLIRNKANS
YTTEYAAAVKGRFTISRDDSKNTLYLQMSSLKTEDTALYYCT
>V17RF-JYKQ01005777.1-ighv |(31958, 32264)|1.90758957063|(0.798,0.821,0.534)|1
SDQDVSLFAGVQCEVQLVESGGGLVQPGRSLRLSCAASGFTFSSYGMHWVRQAPEKGLEW
VSYIGSSTMYYADSVKGRFTISRDNAKNSLYLQINSLRAE
>V18RF-JYKQ01005777.1-ighv |(46860, 47182)|2.62815412024|(0.894,0.867,0.872)|1
VFSQVTLKESGPALVKPTQTLTLTCTFSGFSLSTSGMRVSWVRQPPGKALEWLARIDWDD
DKYYSTSLKSRLTISKDTSKNQVVLTMTNMDPVDTATYYCARGAH
>V19RF-JYKQ01005784.1-ighv |(1524, 1833)|2.8935312881|(0.983,0.940,0.978)|1
VQCEVQLVESGGGLIQPGGSLRLSCAASGFTFSSYYMYWIRQAPGKGLEWVSAINTGGGS
TWYADSVKGRFTISRENAKNTLYLQMNSLRAEDTAVYYCAK
>V20RF-JYKQ01005787.1-ighv |(1654, 1969)|2.88427267285|(0.939,0.993,0.967)|1
VQCEVQLVESGGGLVQPGGSLRLSCAASGFTFSDHYMDWVRQAPGKGPEWVGFIRNKARG
GTAEYAASVKGRFTISRDDSKNVTYLQMSSLKTEDTAVYYCTT
>V21RF-JYKQ01005787.1-ighv |(14728, 15050)|2.62740285768|(0.936,0.871,0.860)|1
VLSQVTLKESGPALVKPTQTLTLTCTVSGFSLTTSGVGVSWIRQAPGKALEWLAHIYWTD
SKYYSPSLKSRLTISKDTSKNQVVLTITNTDPVDTATYYCARGAQ
>V22RF-JYKQ01005788.1-ighv |(4951, 5260)|2.38577827099|(0.969,0.991,0.692)|1
VLSQVQLQESGPGLVKPSETLSLTCAVSGGSISSYWWGWIRQPPGKGLEWIGIIYGSGGS
NYLNPSLKSRVTLSVDTSKNQFSLKLSSVTAADTAVYYCAR
>V23RF-JYKQ01005789.1-ighv |(14344, 14653)|2.95537212748|(0.987,0.993,0.976)|1
VQCEVQLVESGGGLVQPGGSLRLSCAASGFTFSSYGMHWARQAPGKGLEWVSAINNGGGS
TWYADSVKGRFTISRENAKNTLYLQMNSLRAEDTAVYYCAK
>V24RF-JYKQ01029804.1-trbv |(8296, 8587)|2.23883747799|(0.830,0.729,0.747)|1
PEVTQIPSHQVTQMGQEVILQCVPIPNHLYFYWYRQILGQKVEFLVIFFNNNISEKSEIF
DDRFSVERPDGSNFTLKIKSTKLEDSAMYFCASSE
>V25RF-JYKQ01029805.1-trbv |(2386, 2683)|2.1492376291|(0.874,0.875,0.623)|1
SLDTAVSQTPKYLVTQTGKNEYLKCEQNLGHDTMYWYKQDSKKLLNIMFSYNNKQLIINE
TVPNRISPDSPDKAHLNLHITSLELGDSAVYFCASSQ
>V26RF-JYKQ01029805.1-trbv |(7011, 7327)|2.51287003685|(0.861,0.911,0.778)|1
PIDTGITQTPKHLVMGMTNKKSLKCEQHMGHRAVYWYKQKAKKPPEIMFMYNYETLSINE
SVPSRFSPECSKSSLLYLHLRALQPEDSALYLCASSQDTALQS
>V27RF-JYKQ01029807.1-trbv |(1973, 2271)|2.40908698973|(0.893,0.921,0.716)|1
TQTPSHQVTQMGQEVILRCVPISNHLYFYWYRQILGQKVEFLVSFYNGKISEQSEIFDDR
FSVGRSDGVHFTLKIKSTKLEDSAMYFCASSEATALQ
>V28RF-JYKQ01029807.1-trbv |(9551, 9848)|2.15127356746|(0.905,0.937,0.609)|1
SLDTAVPQTPKYLVTQTGKEESVKCEQNLGHDAMYWYKQDSKKLLKIMFSYNNKQLFINE
TVSNRFSPDSPDKARLILHIKSLELGDSAVYFCASSQ
>V29RF-JYKQ01029807.1-trbv |(18097, 18388)|2.40509456398|(0.892,0.861,0.742)|1
PEVTQTPSHQVTQMGQEVILRCVPISNHFYFYWYRQILGQKVEFLVSFVNDEISDKSEMF
DDRFSVERPDGSNFTLKIKSTKLEDSAMYFCASSE
>V30RF-JYKQ01029807.1-trbv |(28941, 29238)|2.40925263291|(0.913,0.807,0.791)|1
PTDTGVTQTPKHLVMGMTNKKSLKCEQHLGHNAMYWYKQKAKKPPELMFVYQYEKLSINE
SVPSRFSPECSKSSLLYLHLQALQPEDSALYLCASSQ
>V31RF-JYKQ01029807.1-trbv |(39844, 40134)|2.39129044542|(0.892,0.714,0.905)|1
EAGVTQTPRSLIKMRGQQVTLSCSPISGHRSVSWYQQTPGQGLQFLFEYFSETQREKGKF
PSRFSGRQFSNSRSEMNVSTLELEDSALYLCASSL
>V32RF-JYKQ01029809.1-trbv |(772, 1069)|2.75163801389|(0.897,0.907,0.968)|1
PANADVTQSPKFQILKTGQSMTLQCAQDMNHNSMYWYQQDPGMGLRLIHYSATEDTTDPG
EVPDGYSVSRLNKKEFLLKLESAAPSQTSVYFCASSE
>V33RF-JYKQ01029809.1-trbv |(15370, 15683)|2.38233531162|(0.925,0.866,0.737)|1
SLDTAVSQTPKYLVTQTGKNESLKCEQNLGHDTMYWYKQDSKKLLKIMFSYNNKEPILNE
TVPNRFSPKSPDKAHLNLHIKSVELGDSAVYFCASSQDIALQ
>V34RF-JYKQ01029809.1-trbv |(18791, 19088)|2.16668070582|(0.790,0.874,0.629)|1
PMDTGVTQTPRHLVMGMTNKKSLKCEQHLGHNAMYWYKQKARKPPELMFIYNFKEPAENN
SVPSRFVPECPDSSLFYLHLHALQPEDSALYLCASSQ
>V35RF-JYKQ01029809.1-trbv |(33264, 33561)|2.63215664392|(0.920,0.938,0.817)|1
PVNAGVTQTPKFQILKTGQNMTLKCAQDMNHNYMYWYRQDPGMGLRLIHYSAGEGSTEKG
EVPDGYNASRLNPQNFLLRLESAAPSQTSMYFCASSE
>V36RF-JYKQ01029809.1-trbv |(37007, 37307)|2.54930576921|(0.928,0.853,0.829)|1
HTGAGVSQSPRNKVTEEGKDVVLRCDPISGHTALYWYRQSLGKGLEFLIYFQGNDAPDKS
GLPSGRFSAERTEGSVSTLKIQRTEQGDSAVYLCASSL
>V37RF-JYKQ01029811.1-trbv |(568, 868)|2.54814787327|(0.886,0.867,0.816)|1
HTGAGVSQFPSNKVTEKGKDVALRCDPISGHAVLYWYRQNLGQGLEFLIYFQGTGAVDDS
GLRSDRFSATRPEGSVSTLKIRHTEQGDSATYFCASSL
>V38RF-JYKQ01029811.1-trbv |(5612, 5924)|2.26140806582|(0.868,0.746,0.755)|1
PVDTGVTQSPTHLIKTRGQQVTLRCSPISGHTSVSWYQQAPGQGPQFIFEYANELRTSEG
NFPHRFSGRQFRDYHSEMNVSALELGDSALYLCASSLAQPGR
>V39RF-JYKQ01029811.1-trbv |(8288, 8584)|2.43616360322|(0.889,0.728,0.922)|1
SVDSGVTQTPKHLITAIGQQVTLRCSPRSGDLSVYWYQQSLGQGLQFLVQYYNGEEREKG
NILERFSAQQFPDLHSELNLSSLELGDSALYFCASSL
>V40RF-JYKQ01041707.1-ighv |(10254, 10563)|2.83173453214|(0.973,0.958,0.915)|1
AHSQVQLVQSGPEVKQPGASVKVSCKASGYSFTTYGMNWVRQAPGQGLEWMGWMNTYTGN
PTYAQGFTERFVFSMDTSVSTVYLQISSLKAEDTAMYYCAR
>V41RF-JYKQ01041713.1-ighv |(30683, 30998)|2.93303223422|(0.978,0.967,0.989)|1
VQCEVQLVESGGGLVQPGGSLRLSCAASGFTFSSSAMHWVRQASGKGLEWVGYIRSKSNN
YATQYAASVKGRFTISRDDSKNTLYLQMSSLKTEDTAMYYCTT
>V42RF-JYKQ01041713.1-ighv |(41631, 41955)|2.65512545504|(0.844,0.956,0.941)|1
VQCEVQLVESGGGLVQPGESLRLSCAASGFTFSDYYMDWVCQAQGRGWSGLATQTLFLNK
ANSYTTEYAASVKGRFTISRDDSENTLYLQTSSMNTEDTAVYYCAR
>V43RF-JYKQ01041713.1-ighv |(51469, 51784)|2.96856084981|(0.994,1.000,0.976)|1
VQCEVQLVESGGGLVQPGGSLRLSCAASGFTFSDHYMQWVRQAPGKGLEWVGFIRSKAYG
GTAEYAASVKGRFTISRDDSKSIASLQMSSLKTEDTAVYYCAR
>V44RF-JYKQ01041713.1-ighv |(65843, 66152)|2.7532783301|(0.967,0.855,0.981)|1
VQCEVQLVESGGGLVKPGGSLRLSCAASGFTFGDYAMSRVRQAPGKGLEWVSSISNTGKT
IYYADSVKGRFTISRDNAKNSLSLQMSSLRAEDTAVYYCAR
>V45RF-JYKQ01041713.1-ighv |(71051, 71357)|2.99194800078|(0.997,0.995,1.000)|1
VQCEVQLVESGGGLVQPGGSLRLSCAASGFTFSSYGMNWVRQAPGKGLEWVSYISSGGST
YYADSVKGRFTISRDNSKNTLSLQMNSLRAEDTAVYYCAG
>V46RF-JYKQ01041718.1-ighv |(4152, 4461)|2.7802407656|(0.943,0.994,0.873)|1
AHSQVQLVQSGAEIKQPGASVKLSCKASGYTFTSYYMHWVRQAPGQGLEWIGLISPYNGN
KGYAQNFQGRVTITADTSTSTGYMELSSLRSEDTAVYYCTR
>V47RF-JYKQ01041718.1-ighv |(11509, 11818)|2.78841387105|(0.975,0.864,1.000)|1
VQGEVQLVESRGGLAKPGGSLRLSCAASGFTFSGYNMYWVRQASGKGLEWVSGISYTGGS
TWYADSVKGRFTISRENAKNTLYLQMNSLRAEDTAVYYCAR
>V48RF-JYKQ01041718.1-ighv |(23132, 23439)|2.0022680019|(0.853,0.977,0.546)|1
VQCEVQLVESGGGLVQPGGSLRLSGAASAFTFSDDYMEWVRQAPGKGLEWVGQINPNGGT
TFLMDSVKGRFTISRDNAKNTLYLQINSLKIEDTAVYYCT
>V49RF-JYKQ01041718.1-ighv |(32027, 32336)|2.94844327922|(0.998,0.979,0.975)|1
VQCEVQLVESGGGLVKPGASLRLSCAASGFTFGDYTMHWVRQAPGKGLEWVSYISSASSY
IHYADSVKGRFTISRDNAKNSLYLQMNSLKTEDTAVYYCTR
>V50RF-JYKQ01041720.1-ighv |(764, 1078)|2.24047186694|(0.913,0.794,0.723)|1
VLSQVTLKESGPALVKPTQTLTLTCTFSGFSLTTSGMGVGWIRQPPGKALEWLANIYWDD
GKYYSPSLKSRLTISKDTSRKQVVLTMTNMDPVDTATYYCARG
>V51RF-JYKQ01051981.1-igkv |(559, 859)|2.89445386218|(0.968,0.982,0.947)|1
ARCDIQMTQSPSSLSASVGDRVTITCQASQGISSWLAWYQQKPGKAPKLLLYKASGLQSG
VPSRFSGSGSGTEFTLTISSLQPEDFATYYCQQFSSAL
>V52RF-JYKQ01051984.1-igkv |(153, 453)|1.80743356619|(0.959,0.510,0.904)|1
TTGEIVMTQSPATWALSPGERATLSCRASQSVSSRLAWYQQKPGQAPRLLIYGASSRATG
IPDRFSGSGSGTEFTLTISSLEPEDVGVYYCQQDYSWP
>V53RF-JYKQ01051984.1-igkv |(27105, 27405)|2.70617281267|(0.954,0.847,0.950)|1
ARCDIQMNQSPSSLSASVGDTVTITCRANQGISNNLAWYQQKPGKVPQLLIYYASSLASG
IPSRFSGSGSGTEFTLTISSLQPEDFAAYYCLQHNSYP
>V54RF-JYKQ01051985.1-igkv |(4005, 4303)|2.22002065848|(0.891,0.931,0.635)|1
TTVEIVMTQSPATLSLSPGERATLSCRASQSVSSYLSWYQQKPGQAPRILIYGASSRATG
IPDRFSGSGSGTDFTLTISSLEPEDVGVYFCPQSSNW
>V55RF-JYKQ01052451.1-igkv |(138345, 138660)|2.30656032223|(0.848,0.705,0.833)|1
TSGDILLTQTPLSLPVTTGEPASISCRSSQSLLHSNENTYLHWYLQKPGQSPQLLIYEVS
NRASGVPERLSGSGSDTDFTLKINLVEAEDVGVYYCMQTTQWP
>V56RF-JYKQ01052451.1-igkv |(143240, 143558)|2.69234267017|(0.977,0.844,0.944)|1
SSGDIVMTQTPLSLPVTPGEPASISCRSSQSLLDSEDGNTYLDWYLQKPGQSPQLLIYEV
SNRASGVPDRFSGSGSDTDFTLKISRVEAEDVGVYYCMQALQNP
>V57RF-JYKQ01054915.1-trav |(5555, 5858)|2.25157704316|(0.833,0.748,0.736)|1
MCLILVTTGQNIDQPTEMTAMEGAIVQINCTYQTSGFNGLSWYQQHDGEAPTLLSYNVLD
GLEEKGRFSSFLSNSKRYSYLLLKELQMKDSASYLCAVR
>V58RF-JYKQ01054925.1-trav |(5053, 5369)|2.4301370486|(0.892,0.764,0.846)|1
QLVTQPEDQVTVAEGNPLTVKCTYSVSGNPYLFWYVQYPNQGLQFLLKYITGDNLVKGSY
GFEAEFNKSQTSFHLKKPSALVSDSALYFCAVRDTLIGAAGGA
>V59RF-JYKQ01054933.1-trav |(11630, 11920)|2.63663412726|(0.864,0.864,0.922)|1
MSRGEDVEQSLFLSVREGDISVINCTYTDSSSTYLYWYKQEPGAGLQLLIYILSNMDLKR
DQRVTVLLNKKDKHLSLRIADTQTEDSAIYFCAES
>V60RF-JYKQ01054940.1-trav |(18103, 18397)|2.80520848353|(0.973,0.993,0.877)|1
GINGDSVVQTEGQVLLSEGNSLIVNCSYESTQYPSLFWYVQYPGEGPQLLLKAMKDNDKE
SNKGFEATYRKETTSFHLEKDSVQESDSAVYFCALS
>V61RF-JYKQ01054940.1-trav |(31345, 31638)|2.45283312171|(0.787,0.832,0.979)|1
GSGKNQVEQSPQSLIILEGKNCTLQCNYTVSPFNNLRWYKQDTGKGPISLTIMTFSENTK
SNGRYIATLDADTKQSSLHITAAQLSDSASYICVVS
>V62RF-JYKQ01054940.1-trav |(46970, 47276)|2.37385750893|(0.924,0.733,0.866)|1
VWSQQKEVEQDPGPFSVPEGATVTFNCTYSNSASQSFFWYRQDSRKEPKLLMSAYSSGNE
DGRFTAQLNRASQYISLLIRDSQLSDSATYLCAVYTQCSP
>V63RF-JYKQ01054940.1-trav |(52430, 52727)|2.36965541354|(0.956,0.778,0.823)|1
GTRAQSVTQLDSQVSVSEGAPVLLRCNYSSSVPPYLFWYVQYPNQGLQLLLKYTSGTTLV
KGINGFEAEFKKSETSFHLRKASAHVSDAAEYFCAVS
>V64RF-JYKQ01054942.1-trav |(16188, 16478)|2.65819665617|(0.927,0.816,0.971)|1
VNGENVEQHPSILSVQEGDSSVIKCTYSDSASNYFPWYKQELGKEPQFIIDIRSNAHEKK
DQRITVLLNKTAKHFSLHITETQPGDSAVYFCAAS
>V65RF-JYKQ01054942.1-trav |(38704, 38992)|2.75839485041|(0.905,0.898,0.975)|1
VWSQQKVEQNSGPLSVPEGAIASLNCTYSDRGSQSFFWYRQYSGQSPELLMSTYSSGDKE
DGRFTAQLNRASQYVSLLIRDSQPSDSATYLCAV
>V66RF-JYKQ01054942.1-trav |(45190, 45487)|2.14483255905|(0.926,0.680,0.808)|1
GTKAQSVTQLDSQVSVSEGVPVLLRCNYSSSFPPTLFWYVQYPNQGLQLLLKYTSGTTLV
KGINGFEAEFKKSETSFHLTKASAHVSDAAEYFCAVN
>V67RF-JYKQ01054942.1-trav |(50752, 51049)|1.87941311664|(0.912,0.851,0.546)|1
TARAQSVTQPDIHITVSEGASLELRCNYSYGATPSLFWYVQSPGQGLQLLLKYFSGDTLV
QGIKGFEAEFKRSQYSFNLRKHSVHWSDAAEYFCAAG
>V68RF-JYKQ01054942.1-trav |(64627, 64920)|2.39276528132|(0.930,0.895,0.726)|1
VSRGESVGLHLPTVSVQEGDNSVINCTYSDSASDYFLWYKQESGKGPQSIIDIRSNMAKR
QGQRLTVFLNKTMKHLSLQIAATEPGDSAVYFCAEN
>V69RF-JYKQ01054942.1-trav |(70517, 70818)|2.50844607516|(0.936,0.816,0.845)|1
SGIAQKITQTQPAMFVQEKEAVTLDCTYDTSDQSYGLFWYKQPSSGEMIFLILQMSYDKQ
NATEGRYSLNFQKARKSVNLVISASQVGDSAMYFCAMR
>V70RF-JYKQ01054942.1-trav |(88856, 89150)|2.71167100508|(0.929,0.881,0.912)|1
RTRGDSVTQMEGPVTLSERAFLTINCTYTATGYPSLFWYVQYPGEGPQLLLKATKTDEKG
SNKGFEATYRKETTSFHLKKDSVQESDSAVYFCALS
>V71RF-JYKQ01054942.1-trav |(113522, 113815)|2.70725869849|(0.896,0.883,0.935)|1
VWSQQKEVEQNPGPLSVPEGATASLNCTYSNSAFQYFMWYRQYSRKGPQLLIYIYSSGNK
EDGRFTAQVDKSSKYISLFIRDSQPNDSATYFCAMS
>V72RF-JYKQ01054944.1-trav |(3302, 3602)|1.831749853|(0.913,0.728,0.616)|1
GTRAQSVTQLDSQVPVFEEAPVLLRCNYSSSSVSVYLFWYVQYPNQGLQLLLKYLSGPTL
VKGINGFEAEFKKSETSFHLRKPSAHISDTAEYFCAVS
>V73RF-JYKQ01054953.1-trav |(3497, 3784)|2.74722051637|(0.928,0.938,0.888)|1
VNSQQGEEDPQTLSIQEGENATMNCSYKTSINNLQWYRQDSGRSLVQLILIRSNEREKNS
GRLRVTLDTSKKSSSLLITASRAADTASYFCATD
>V74RF-JYKQ01054957.1-trav |(3986, 4308)|2.63387824967|(0.845,0.913,0.912)|1
RTNGDSVTQTEGPVTLPERAALTLNCTYQTSYSAFIFWYVQYPNKEPELLLKSSENQETN
SRGFQASHVKSDSSFHLEKPSVQLSDSAVYYCVLRDTVGGTAARA
>V75RF-JYKQ01054957.1-trav |(7206, 7509)|2.32585950593|(0.817,0.793,0.741)|1
SSMAQKVTQAQTEISVVEKEDVTLDCVYETRDTTYYLFWYKQPPSGELVFLIRQNSFDEQ
NEINGRYYSKFQKSTSSFNLTITASQVVDSAVYFCALNE
>V76RF-JYKQ01054957.1-trav |(42945, 43232)|2.27818803733|(0.866,0.778,0.733)|1
LSGEDQVTQSPEALSLQEGDSSSLNCSYTVSGLRGLLWYRQDPGKGPEFLFILYSAGEEK
EKERLKATLTKKESFLHITGPKPEDSATYLCAVQ
>V77RF-JYKQ01054966.1-trav |(1135, 1423)|2.22270717604|(0.770,0.663,0.896)|1
IQVEQSPPDLILQEGANSTLRCNYSATVSSLQWFHQNPWGQLINLFYITSGTKQNGRLSA
TTVTKERYSLLHISSSQTTDSGIYFCAVEPQCSP
>V78RF-JYKQ01062966.1-iglv |(12021, 12331)|2.77535067488|(0.937,0.903,0.940)|1
SWAEVVFTQPHSVSGSPGQTVTISCTRSSGSIDSSYVYWYQQRPGSAPTTVIYSDDQRPS
GVPDRFSGSIDSSSNSASLTISGLKSEDEADYYCQSYDSSS
>V79RF-JYKQ01067073.1-ighv |(701, 1007)|2.28728678683|(0.725,0.929,0.891)|1
VRCEVQRVESGGGLVQPGGSLRLSCAASGFTISSSWMNWDFQAPGKGLECVSHIISGGST
DYPDSFKGRFTISRDNTKNTLYVQKNSLRAEDMAVYYCAR
>V80RF-JYKQ01067101.1-ighv |(5042, 5351)|2.86107818339|(0.983,0.991,0.909)|1
TQSQVQLVQSGAEVKKPGASVKLSCKASGYTFTSYGINWVRQAPGQGLEWMGWINPSNGN
TGYAQKFQGRVTMTRDTSTSTAYMELNSLRSDDTAVYYCAR
>V81RF-JYKQ01067101.1-ighv |(30146, 30461)|2.79533161952|(0.981,0.872,0.989)|1
VLSQVQLQESGPGVVKPSETLSLTCAVSGASISSGYYYWSWIRQPPGKGLEWIGGIYSNS
GSTNYNPSLKSRVTISKDTSKNQFSLKLSSVTAADTAVYYCAR
>V82RF-JYKQ01079834.1-igkv |(1745, 2043)|2.45307561179|(0.911,0.790,0.833)|1
TTGEIVLTQSPATLALSPGEGATLSCRASQSVSRYSSWYQQKPGQAPRLLIYGASSRATG
IPARFSGSGSGTDFTLTISSLEPEDVAVYFCQQSNNW
>V83RF-JYKQ01086555.1-ighv |(11851, 12160)|2.81862259543|(0.935,0.908,0.991)|1
VQCEVQLVESGGGVVQPGGSLRLLCAASGFTFDDYAMHWVRQAPGKGLEWVSAISWDGDS
TYYADSVKGRFTISRDNAKNSLYLQMNSLRAEDTAVYYCAR
>V84RF-JYKQ01114545.1-iglv |(3565, 3871)|2.71796429359|(0.882,0.959,0.902)|1
DSETVVTQEPSLSVSSGGTVTLTCGLSSGSVSTSNYPSWYQQTPGQAPRTLIYRTNTRPS
GVPDRFSGSILGNKAALTITGAQADDESDYYCMLYMGSGI
>V85RF-JYKQ01131089.1-trbv |(3084, 3375)|2.44181463266|(0.920,0.810,0.808)|1
AGVAQSPRYKITEKSQAVAFWCDPISGHATLYWYRQILGQGPELLVRFQNEDVVDDSQLP
KDRFSAERLKGVDSTLKIQPAELGDSAVYLCASSL
>V86RF-JYKQ01131090.1-trbv |(8544, 8841)|2.20999094911|(0.878,0.629,0.936)|1
HRDAEITQSPRYKVTETGRKVTLTCHQTWNHNNMFWYRQDLGHGLRLIYYSAGASIIDKG
EVPDGYVVSRSKTEDFPLTLESATRSQTSVYFCASSE
>V87RF-JYKQ01131090.1-trbv |(17704, 17995)|2.38574681398|(0.906,0.886,0.722)|1
AGVVQSPRYKVIEKSQAVTFWCNPVSGHATLYWYRQILGQGLELLVQFRNNDVVDDSQLP
KDRFSAERLKGVNSTLKIQPAELGDSAVYLCASSL
>V88RF-JYKQ01131090.1-trbv |(36297, 36594)|2.8245959051|(0.980,0.963,0.905)|1
PVNAGVTQTPKFQILKTGQSMTLQCAQDMNHDCMYWYRQDPGMGLRLIHYSVGEGSTDKG
EVPDGYNVTRSNTEDFPLRLESAAPSQTSVYFCASSY
>V89RF-JYKQ01131090.1-trbv |(40488, 40788)|2.45920365021|(0.903,0.734,0.934)|1
HTGAGVSQSPRYKVTKRGQDVALRCDPISGHDYLYWYQQAPGQGPAFLTYFQNDAQRDKS
GLPNDRFSAEMPEGSVSTLKIQRTEQGDSAVYLCASSL
>V90RF-JYKQ01131090.1-trbv |(48415, 48705)|2.40331274782|(0.920,0.841,0.762)|1
DAGVTQSPTHLIKTRGQQVTLRCSPISGHTSVYWYQQALGQGLQFILWYDEEEQRDRGTF
PHRFSGRQFPNYSSELNVNASEMGDSALYLCASSL
>V91RF-JYKQ01131090.1-trbv |(54020, 54340)|2.33145563255|(0.883,0.862,0.706)|1
NAGVTQTPKFQVLKTGQSMTLQCAQDMSHNSSYWYGQDPGMGLRLIRYSAAAGVTDKGEV
PSGYNVSRLNTEDFRLRLESAAPSQTSVYFCASSYSPTLQGRLLS
>V92RF-JYKQ01131090.1-trbv |(60130, 60430)|2.71034553085|(0.921,0.885,0.910)|1
HTGAGVSQSPRYKVTKRGQDVALRCDPISGHVALYWYRRTLGQGPEFLTYFQNDAQPDKS
GLPSDRFSAERPEGSVSTLKIQRTEQGDAAVYLCASSL
>V93RF-JYKQ01131091.1-trbv |(1114, 1410)|2.35163129811|(0.948,0.715,0.895)|1
SVDGGVTQSPRHLIKTTGQQVTLRCSPISGHTSVSWYQQALGQGPQFIFEYYEEKERERG
NFPDRFSGHQFPNYSSELNVNALEAGDSALYLCASSL
>V94RF-JYKQ01131092.1-trbv |(9, 305)|2.35163129811|(0.948,0.715,0.895)|1
SVDGGVTQSPRHLIKTTGQQVTLRCSPISGHTSVSWYQQALGQGPQFIFEYYEEKERERG
NFPDRFSGHQFPNYSSELNVNALEAGDSALYLCASSL
>V95RF-JYKQ01131092.1-trbv |(3324, 3621)|2.61482253632|(0.889,0.961,0.810)|1
LVNAGVTQTQKFQVLKTGQSMTVQCAQDMNHDCMYWYRQDPGMGLRLIHYSDAAGTTDKR
EVPSGYNVSRLNIEDFPLRLESAAPSQTSVYICASSY
>V96RF-JYKQ01131093.1-trbv |(3504, 3804)|2.28845107148|(0.899,0.930,0.663)|1
HTGARVSQSPRYKVTKRGQDVALRCDPISGHDYLYWYQQVLEQGPELLTYFSYGAQQDKS
GLPGDRFSAERPEGSVSTLQIQHTQQGDSAVYPCASSL
>V97RF-JYKQ01131093.1-trbv |(13830, 14126)|2.00695597826|(0.898,0.772,0.637)|1
SVDAGVTQSPTHLIRKRGQQVTLRCSPISGHNTVSWYKRALGQGPQFIFQYYEKEERERG
NFPGRFSGHQFPNYSSELNVNASEMGDSALYLCASSL
>V98RF-JYKQ01131093.1-trbv |(22892, 23189)|2.76451845765|(0.946,0.911,0.916)|1
PGNAGVTQTPKFQILKTGQSMTLQCAQDMNHNYMSWYRQDPGVGLRLIHYSVGAGVTDKG
EVSNGYNVSRLNTEDFPLSLESAASSQTSVYFCASSY
>V99RF-JYKQ01131094.1-trbv |(5376, 5676)|2.58303477024|(0.945,0.779,0.965)|1
HTGAGVSQFPRYRVTKRGQDVTLRCDPISGHEYLYWYQQAPGQGPELLTYFQNDAQLDKS
GLPSDRFSAERTEGSVSTLKIQRTEQGDSAVYLCASSL
>V100RF-JYKQ01131094.1-trbv |(13819, 14115)|2.48796656701|(0.932,0.770,0.892)|1
PVDTGVTQSPTHLIKTRGQQVILRCSPISGHSSVYWYQQALGQGPQFIFEYYEKEERGRG
NFPDRFSGRQFPNYSSELNVSALLLGDSALYLCASSL
>V101RF-JYKQ01131094.1-trbv |(21287, 21594)|2.5865318494|(0.912,0.835,0.870)|1
PGNADVTQTPKFQVLKTGQSLTLQCAQDMNHNYMYWYRQDPGMGLRLIHYSVGAGITDKG
EVPNGYNVFRLNTEDFPLRLESAALSQTSVYFCASSDTTV
>V102RF-JYKQ01131095.1-trbv |(9158, 9454)|2.55998884907|(0.930,0.797,0.904)|1
PVDTGVTQSPTHLIKMRGQQVTLRCSPISGHSSVSWYQQALGQGPQFIFQYYEKEERGRG
NFPDRFSGRQFPNYSSELNVSALLLGDSALYLCASSL
>V103RF-JYKQ01131096.1-trbv |(2555, 2846)|2.5148750933|(0.919,0.943,0.756)|1
NAGVTQTPKFQVLKTGQSMIVQCAQDMKHDYMFWYRQDPGMGLRLIYYSVTAGITTKGEV
PNGYNVSRINTEDFLLRLESAAPSQTSVYFCASSY
>V104RF-JYKQ01131098.1-trbv |(4345, 4645)|2.69999882769|(0.904,0.856,0.963)|1
HTGAGVSQSPRYKVIKKGQDVALRCDPISGHAGLYWYQQALGQGPEFLTYFNYQAQPDKS
GLPNDRFSAERHEGSVSTLTIQRTEQQDSAVYLCASSL
>V105RF-JYKQ01131101.1-trbv |(106, 402)|2.031110678|(0.901,0.837,0.605)|1
PVDAGVAQSPTHLIKTRGQQVTLRCSPISGHNTVYWYQQALGQGPQLIFQYYRGEDRGRG
NFPDRFSGHQFPNYSSELNVSALLLGDSALYLCASSL
>V106RF-JYKQ01131101.1-trbv |(9053, 9353)|2.64874224752|(0.874,0.897,0.880)|1
HTDARVSQDPRHKITKTGQNVSFKCVPISEHNRLYWYRQTLGQGPEFLTYFQNEAQQDRS
GLFSDRFSAERPEGSISTLMIQHTEQGDSAVYLCASSL
>V107RF-JYKQ01131101.1-trbv |(15539, 15836)|1.89317565055|(0.860,0.513,0.914)|1
SVAAGVTQAPRHLIKEKRETATLQCYPIPEHDTVYWYQQGPGQGPQFLISFYEKMQRDKG
SIPDRFSAQQFSDYHSELNMSSLELGDSAVYLCASSL
>V108RF-JYKQ01131101.1-trbv |(23980, 24277)|2.68231017975|(0.921,0.912,0.863)|1
HMDAGITQSPRHKITETGTPVTLRCHQTENHRYMYWYRQDLGRGLRLIHYSYGVEDTDKV
EVSDGYSVSRSKTEDFLLTLESATRSQTSVYFCASSE
>V109RF-JYKQ01131101.1-trbv |(35038, 35338)|2.00819569348|(0.939,0.614,0.839)|1
LTEAGVTQSPRYKITEKKQPVAFWCNPISGHNTLYWYRQNSGQGPELLVRYENEEAVDDS
QLPKDRFSAERLKGVDSTLRIQPAELGDSAVYLCASSL
>V110RF-JYKQ01131102.1-trbv |(2948, 3248)|2.49240197492|(0.931,0.967,0.738)|1
HTDAGVIQSPRHKVTEMGKEVTLRCEPISGHTYLFWYRQTMMQGLEFLIYFNNKDPTDDS
GMPKDRFSAKMPNASFSTLKIQPSEPRDSAVYFCASSL
>V111RF-JYKQ01131102.1-trbv |(18186, 18486)|2.10675854537|(0.835,0.945,0.589)|1
LIDAGVTQTPRHKVTEMGQEVTMRCQPILGHNTVFWYRQTMMQGLELLVYLRNKASLDDS
GMPKDRFSAEMPNASLATLKIQPSEPRDSAVYLCASGL
>V112RF-JYKQ01131102.1-trbv |(25139, 25449)|2.38317674346|(0.942,0.850,0.755)|1
HTEAGVTQFPSHRVIEKGQTVTLRCDPISGHDYLYWYRRVMGKEIKFLISFMRVSTQDES
GMPNKRFSAERTGGTYSTLKVQPAELEDSGVYFCASSQDTV
>V113RF-JYKQ01131102.1-trbv |(30162, 30459)|1.73641231208|(0.874,0.688,0.586)|1
HGDVMVIQNPRYQVTQLEKPVTLSCSQNLNHKVMYWYQQKPSQAPKLLFHYYDKDFNNEA
DTPDNFQSRRPNTSFCFLDIRSPGLEDAAVYLCASSK
>V114RF-JYKQ01131102.1-trbv |(35121, 35421)|2.4126808932|(0.897,0.820,0.776)|1
SPGEEVTQTPKHLVKGEGQKAKLYCDPIKGHSYVFWYQQVLRKEFKFLISFQNKNVFDET
GMPKERFSAKCHANSPCSLEIQATKLKDSAVYFCASSQ
>V115RF-JYKQ01131103.1-trbv |(16377, 16670)|1.85897623205|(0.765,0.538,0.744)|1
LSNAGITQNPRHLVRRRGQEARLRCSPTKEHSHVYWYRQLPEEGLKFMVYLQKEKIIDES
GMPKEQFSAEFPKEGPSILRIQQAEQEDSAAYFCAS
>V116RF-JYKQ01131104.1-trbv |(2283, 2580)|2.53145834685|(0.890,0.900,0.785)|1
TVDGGITQSPKYVFRKEGQNVTLSCEQNLNHNAMYWYRQDPGQGLRLIYYSQIVNDIQKG
DIAEGYSVSRERKQSFPLTVTSAQRNPTAFYLCASSI
>V117RF-JYKQ01131104.1-trbv |(20313, 20613)|2.3889776113|(0.880,0.716,0.896)|1
STDTKVTQRPRLLVKANGQKAKMDCVPVKGHSYVYWYRKKLDEELKFLVYFQNEEIIQKA
EIINERFSAQCPQNSPCTLEIQSTESGDAALYYCASSK
>V118RF-JYKQ01131105.1-trbv |(770, 1075)|2.45629183767|(0.866,0.816,0.801)|1
SFHAEVTQTPGYLVKGKGQKTKMDCTPEKGHTYVYWYQQNQNKEFTFLISFQDEQVLQET
ELHKKRFSSQCRKNLPCSLEIPSSEPGDTALYLCASSQST
>V119RF-JYKQ01131107.1-trbv |(8150, 8448)|2.69160939495|(0.907,0.937,0.860)|1
SMDADVTQTPRNKIAKTGKRIMLECSQTKGHDQMYWYRQDPGLGLRLIYYSFDVQDINKG
EISDGYSVSRQEQAKFSLSLESATPNQTALYFCATSD
>V120RF-JYKQ01131107.1-trbv |(16640, 16937)|2.24078065022|(0.860,0.939,0.641)|1
LMEADIYQNPRHRVIGTGKKITLECSQTMGHDKMYWYQQDPGMELHLIHYSYGVNSTERG
DYSSKSTVSRLRIEHFPLTLESTSPSHTSQYLCASSE
>V121RF-JYKQ01131110.1-trbv |(21384, 21680)|2.25504358476|(0.842,0.925,0.651)|1
PLEAQVTQNPRYLITVTGKKLTVTCSQNMNHEYMSWYRQDPGLGLRQIYYSSNVELVDKG
DIPEGYNVSRKEKTTFPLILESPSPSQTSLYFCASSY
>V122RF-JYKQ01131110.1-trbv |(26751, 27058)|2.60581084009|(0.855,0.867,0.889)|1
LVDVKVTQSSRYLIKRTGEKVFLECVQDMDHERMFWYRQDPGLGLRLIYFSYDVKLNEKG
DIPEGYSVSREKKERFSLILGSTSTNQTSMYLCASSLSTA
>V123RF-JYKQ01131111.1-trbv |(5907, 6210)|2.52369755945|(0.871,0.774,0.929)|1
SVFSAVISQKPSRDVCQRGTSVTFQCQVDSQVTMMFWYRQRPGQSMTLIATANQGSEATY
ESGFVIDKFPISRPNLTFSTLTVSNTSPEDSSIYLCSVE
>V124RF-JYKQ01135385.1-trav |(1626, 1927)|2.30050995255|(0.876,0.914,0.671)|1
SGMAQTVTQSQPEVSVREAETVTLSCTYDTSESNYYLFWYKQPPSRQMILIIRQEAYKQQ
NATENRFSVNFQKAAKSFSLKISDSQLGDAAMYFCAFM
>V125RF-JYKQ01135388.1-trav |(4501, 4803)|2.75290741148|(0.932,0.924,0.901)|1
SGMAQTVTQSQPEMSVQEAETVTLSCTYDTSESNYYLFWYKQPPSRQMILIIRQEAYKQQ
NATENRFSVNFQKATKSFSLKISDSQLGDAAMYFCAYRS
>V126RF-JYKQ01135389.1-trav |(2804, 3092)|2.49662047425|(0.819,0.800,0.916)|1
LSGELKVGQNPLFLSTQEGKNYTIYCNYSTASDRLYWYRQDPGKSLESLFVLLSNGAVKQ
EGRLMASLDTKARLSSLHITAALQDLSATYFCAV
>V127RF-JYKQ01135389.1-trav |(19852, 20154)|1.65749153963|(0.608,0.474,0.843)|1
VSAAKNEVEQSPQDLTAQEGEFITINCSYSIGINSLHWLQQHPGGGIVSLFMLSSEKKKN
GRLIATINTQERHSSLHIAASQPRDSAIYICAVRHSALQ
>V128RF-JYKQ01187326.1-igkv |(1372, 1659)|2.62250420959|(0.972,0.808,0.947)|1
TVVTQSPATLSVSPGERATISCRTSQSVGSRLAWYQQKPGQAPRLLIYGASNRATGIPDR
FSGSGSGTDFTLTISSLKPEDAAVYYCQQDNDWK
>V129RF-JYKQ01187337.1-igkv |(7825, 8116)|2.68886312132|(0.942,0.823,0.987)|1
IVLTQSPTSMAVSQGERVTISCTASSSVSTSYLHWYQQKPGFPPRLLVYRTSNLASGVPA
RFSGSGSGTSYTLTISSMEAEDAANYYCQQGNSIP
>V130RF-JYKQ01245859.1-ighv |(891, 1200)|2.87905723435|(0.994,0.940,0.961)|1
AHSQVQLVQSGAEVKKPGASVKVSCKASGYTFTDYYMHWVRQAPGQGLEWIGWINPYNGN
TKYAQKFQGRVTMTRDTSTSTAYMELSSLRSEDTAVYYCAR
>V131RF-JYKQ01245874.1-ighv |(7328, 7639)|2.76483813726|(0.966,0.864,0.976)|1
VRCEVQLVESGGGVVQPEGSLRLSCAASGFTFDDYAMHWVRQAPGKGLEWVSGISWNGDS
TYYADSVKGRFTISRDNAKNSLFLQMNRLRAEDTAVYYCAKD
>V132RF-JYKQ01245874.1-ighv |(37996, 38302)|2.96160004313|(0.992,0.986,0.984)|1
VQCEEQLVESGGGLVQPGASLRLSCAASGFTFSSYDMHWVRQAPGKGLEWVSAISIGGGT
YYPDSVKGRFTVSRDNAKNSLYLQMNSLRAEDTAVYYCAR
>V133RF-JYKQ01245876.1-ighv |(15391, 15700)|2.38889265742|(0.931,0.958,0.698)|1
VLSQLQLQESGPGVVKPSETLSLTCAVSGGSISSYWWGWIRQPPGKGLEWIGSIYGSGGS
NYLNPSLKSRVTLSVDTSKNQFSLKLSSVTAADTAVYYCAR
>V134RF-JYKQ01245876.1-ighv |(36255, 36564)|2.9898400105|(0.994,1.000,0.996)|1
VQCEVQLVESGGGLVQPGGSLRLSCAASGFTFSSYWMNWVRQAPGKGLEWVSRINSDGSS
TNYADSVKGRFTISRENAKNSLYLQMNSLRAEDTAVYYCTT
>V135RF-JYKQ01245880.1-ighv |(7638, 7950)|2.97696000066|(0.993,0.994,0.990)|1
VQCEVQLVESGGGLVQPGGSLRLSCVASGFTFSDYYMHWARQAPGKGLEWVSRISSGSGS
STYYPDSVKGRFTISRDNAKNTLYLQMNSLRAEDTAVYYCAR
>V136RF-JYKQ01245881.1-ighv |(6177, 6492)|2.97294239438|(0.979,1.000,0.997)|1
VQCEVQLVESGGGLVQPGGSLRLSCAASGFTFSDHYMDWVRQAPGKGLEWVGFIKNKADG
GTADYAASVKGRFTISRDDSKNTLYLQMNSLKTEDTAVYYCTR
>V137RF-JYKQ01245882.1-ighv |(18027, 18336)|2.66561178077|(0.970,0.931,0.838)|1
AHAQVQLVQSGAEVKQPGASVKVSCKASGYTFTSYGMNWVRQAHGQRLEWMGWINTNTGN
PTYAQGFKERFTFSMDTSISTAYLQISSLKAEDTAVYYCAR
>V138RF-JYKQ01245882.1-ighv |(35101, 35410)|2.66247095284|(0.918,0.910,0.852)|1
AHSEVQLVQSGAEVKKPGATVKISCKASGYTFTDYYLHWVRQAPGKGLEWMGRVDPEDGE
ADYAQKFQDRLTMTADTSTDTAYMELSSLRSEDTAVYYCTR
>V139RF-JYKQ01245886.1-ighv |(241, 551)|2.97245211916|(0.996,0.992,0.985)|1
FQCEVQLVESGGGLVQPGGSLRLSCVASGFTFSDHYMDWVRQAPGKGLEWVSSISTGSGS
TTLYPDSVKGRFTISRDNAKNTVYLQMNSLRAEDTAVYYCA
>V140RF-JYKQ01245888.1-ighv |(1665, 1980)|2.93088400513|(0.976,0.981,0.974)|1
VQCEVQLVESGRGLVQPGGSLRLSCAVSGFTFSDHYVSWVRQAPGKGLEWVGFMRNKANG
GRTEYAASVKGTFTISRDDSKSIASLQMSSLKTEDTAVYYCAR
>V141RF-JYKQ01245888.1-ighv |(18543, 18855)|2.89277285433|(0.983,0.976,0.941)|1
VLSQVQLQESGPGVVKPSETLSLTCAVSGGSISDSYYWSWIRQAPGKGLEWIGGIYGSGS
STNYNPSLKSRVTISKDTSKNQFSLKLSSVTAADTAVYYCAR
>V142RF-JYKQ01245889.1-ighv |(13016, 13325)|2.96780001921|(0.992,0.991,0.985)|1
VQCEVQLVESGGGLAQPGGSLRLSCAASGFTFSSYGMSWVRQAPGKGLEWVSGISNTGGS
IYYADSVKGRFTISRDNSKNTLSLQMNSLRAEDTAVYYCAK
>V143RF-JYKQ01245890.1-ighv |(4928, 5237)|2.89725001439|(0.949,1.000,0.959)|1
VQCDVQLVESGGGLVKPGGSLRLSCVASGFTFSSYAMHWVRQAPGKGLEWVSVISTSGGT
TYYADSVKGRFTISRDNAKNSLFLQMNSLRAEDTAVYYCTR
>V144RF-JYKQ01245900.1-ighv |(4135, 4449)|2.33444321656|(0.960,0.681,0.961)|1
VLSQVTLKESGPALVKPTQTLTLTCTFSGFSISTTGTGVGWIRQPPGKALEWLASIYWND
SKYYSTSLKSRLTISKDTSKNQVVLTMTNMDPVDTATYYCARV
>V145RF-JYKQ01245904.1-ighv |(629, 938)|2.93843897096|(0.992,0.997,0.955)|1
VQCEVQLVESGGGVVQPGGSLRLSCAASGFTFDDYAMGWVRQAPGKGLEWVSAISWDGDS
TGYADSVKGRFTISRDNAKNSLSLQMNSLRAEDTAVYYCAR
>V146RF-JYKQ01005004.1-igkv |(7879, 8179)|2.77762014931|(0.950,0.875,0.978)|-1
TTGETVMTQSPATLSLSPGERATLSCRASQSVGSSLAWYQQKPGQAPRLLVYYASSRATG
IPDRFSGSGSGTDFTLTISSLDPEDVGVYYCQKYNDWP
>V147RF-JYKQ01005007.1-igkv |(665, 964)|2.73708566337|(0.993,0.879,0.931)|-1
TTGEIVMTQSPATLSLSPGERATLSCRASQSVGSYLAWYQQKPGQAPRLLIYGASSRATG
IPDRFSGSGSGTEFTLTISSLEPEDFAVYYCQQYNNWN
>V148RF-JYKQ01005012.1-igkv |(8346, 8639)|2.94555643843|(0.996,1.000,0.956)|-1
ARCDIQMTQSPSSLSASVGDRVTITCRASQGISTYLNWYQQKPGKAPKLLIYAASSLQSG
VPSRFSGSGSGTVFTLTISSLQSEDFATYYCLQYNS
>V149RF-JYKQ01005013.1-igkv |(2914, 3214)|2.97375601537|(0.991,0.986,0.997)|-1
AKCDIQMTQSPSSLSASVGDRVTITCRASQGISSYLAWYQQKPGKAPKPLIYYASNLESG
VPSRFSGSGSGTDFTLTISSLQPEDFATYYCQQYNSAP
>V150RF-JYKQ01005014.1-igkv |(6504, 6804)|2.97282001102|(0.994,0.988,0.991)|-1
ARCDIQMTQSPSSLSASAGDRVTITCRASQGISSYLAWYQQKPGKAPKLLIYDASNLQSG
VPSRFSGSGSGTEFTLTISSLQPEDFAVYYCQQRNSYP
>V151RF-JYKQ01005017.1-igkv |(2324, 2623)|2.14489307027|(0.682,0.822,0.723)|-1
IVLTQSPATLSLSPGETATLSCRASESVGSYLAWYQQKPGQAPKLLVHSAYFRATGIPDR
FSGSGSRTEFTLTISSLEPEDVGVYHCQQYHDWSPTVI
>V152RF-JYKQ01005018.1-igkv |(597, 897)|2.58988714208|(0.993,0.830,0.901)|-1
TTGEIVLTQSPGTLSLSPGERATLSCRASQSVSSSLAWYQQKPGQVPRLLIYGASSRATG
IPDRFSGSGSGTEFTLTISSLEPEDFAVYYCQQYSNWP
>V153RF-JYKQ01005018.1-igkv |(13195, 13495)|2.97870083945|(0.999,1.000,0.981)|-1
ARCDIQMTQSPSSLSASVGDRVTITCRASQGISTYLNWYQQKPGKAPKLLIYAASRLESG
VPSRFSGSGSGTEFTLTISSLQPEDFATYYCQQYNSNP
>V154RF-JYKQ01005019.1-igkv |(2037, 2337)|2.58988714208|(0.993,0.830,0.901)|-1
TTGEIVLTQSPGTLSLSPGERATLSCRASQSVSSSLAWYQQKPGQVPRLLIYGASSRATG
IPDRFSGSGSGTEFTLTISSLEPEDFAVYYCQQYSNWP
>V155RF-JYKQ01005022.1-igkv |(4846, 5146)|2.98178801933|(0.997,0.990,0.995)|-1
ARCDIQMTQSPSSLSASAGDRVTITCRASQGISTYLNWYQQKPGKAPKLLIYAASSLQSG
VPSRFSGSGSGTEFTLTISSLQPEDFATYYCQQYNSYP
>V156RF-JYKQ01005026.1-igkv |(2797, 3089)|2.97456408064|(0.996,0.993,0.986)|-1
AKCDIQMTQSPSSLSASVGDRVTITCRASQTISSYLAWYQQKPGKVPKLLIYAASSLESG
VPSRFSGSGSGTEFTLTISSLQPEDFATYYCQQHN
>V157RF-JYKQ01005027.1-igkv |(25376, 25667)|2.86870752475|(0.975,0.946,0.953)|-1
DIQMTQSPASLSASVGDRVTITCRASQSFSSSLAWYQQKPGKAPKLLIYSASSLQSGVPS
RFSGSKSGTDFTLTISSLQPEDIASYYCQQYYSTP
>V158RF-JYKQ01005032.1-igkv |(9334, 9634)|2.66684418174|(0.986,0.839,0.935)|-1
TTGQVILTQSPATLSLSPGERATLSCRASQSVSSNLAWYQQKPGQAPRLLIYGASSRATG
IPDRFSGSGSGTEFTLTISSLEPEDFAVYYCQKYSSSP
>V159RF-JYKQ01005032.1-igkv |(50469, 50773)|1.93657446177|(0.695,0.613,0.660)|-1
SIGDIELTQTLHSLPVNPGEPASISCQSSQSLLHSDGKTYFYWFLQKPGQHPRHPIYWVS
NWNSGVPDRFSGSGAGTDFTLRISVVEAEDVGVYYYMQV
>V160RF-JYKQ01005033.1-igkv |(2883, 3181)|2.6901013405|(0.964,0.820,0.988)|-1
SKGEIVLTQSPAFRSVTLKEKVTITCQASQSIGSSLHWYQQKPDQSPKLLIKYASQSISG
VPSRFSGSGSGTDFTLTINSLEAEDAATYYCQQSRSF
>V161RF-JYKQ01005040.1-igkv |(7064, 7364)|2.18713258849|(0.989,0.982,0.626)|-1
TRCAIQMTQSPSSLSASVGDRVTITCRASQSIGSNLAWYQQKPGKVPKLLIYAASTLQSE
VPSRFSGSGSGADFTLTISSLQPEDVATYYCQKCDSAP
>V162RF-JYKQ01005045.1-igkv |(2627, 2942)|2.1270732026|(0.941,0.804,0.685)|-1
SSGDIVMTQTPLSLPVTPGEPASISCRSSQSLLHSDGYTYLDWYLQKPGQSPQLLIHGGS
NRASGVPDRFSGSGSGTDFTLKISKVEAEDVGVYYCMQHRALP
>V163RF-JYKQ01005048.1-igkv |(219, 521)|2.50736949761|(0.941,0.868,0.798)|-1
SSGDVVMTQSPLSLPVTPGQPASISCRSSQSLVHSNGNTYLSWLQQKPGQPPRLLIYKVS
NRDSGVPDRFSGSGAGTDFTLKISRVEAEDVGVYYCVQV
>V164RF-JYKQ01015003.1-ighv |(1329, 1641)|2.8890138344|(0.982,0.985,0.932)|-1
VLSQVQLQESGPGLVKPSETLSLTCAVSGGSISGSYGWNWIRQPPGKGLEWIGRIYGSSG
NTYYNPSLKSRVTISRDTSKNQFSLKLSSVAAADTAVYYCAR
>V165RF-JYKQ01015024.1-ighv |(3039, 3348)|2.48815526288|(0.878,0.793,0.849)|-1
AHSQEQLVQSGAEVKKPGASVKVSCKASGYIFTGYIISWLRQAPGQGFEWMGGIHPGYGS
TSYAQKFQGRVTMTGDTSTSTVYMELSSLRSEDTAMYYCAA
>V166RF-JYKQ01015026.1-ighv |(1663, 1972)|2.82019283136|(0.940,0.926,0.956)|-1
AHSEMQLVQSEAEVKKPGASVKVSCKASGYTFTYRYLHWVRQTPGQGLEWMGWITPYNGN
TNYAQKFQGRVTITRDRSMSTAYMELSSLRSEDTAVYYCAR
>V167RF-JYKQ01026643.1-trav |(15229, 15519)|2.21306417842|(0.724,0.703,0.842)|-1
VSSEDKVMQNPLSLVVHEGDTVTLNCSYEVANFRSLLWYKQEKKAPIFLFTLTSSGIEKK
SGRLSSILDKKDLYSILNITATQTRDSAVYLCAVE
>V168RF-JYKQ01026644.1-trav |(630, 917)|2.27474929541|(0.725,0.779,0.909)|-1
VTSQELEQSPQSLIVQEGKNLTINCTSSKTLYGLHWYKQKYGEGLIFLMMLQQGGEEKSH
EKITAKLDEKKQQSFLHITASQPSHAGIYLCGGD
>V169RF-JYKQ01026645.1-trav |(2233, 2520)|2.31370592664|(0.745,0.763,0.909)|-1
VSSQELEQSPQSLIVQEGKNLTINCTSSKTLYGLHWYKQKYGEGLIFLMMLQQGGEEKSH
EKITAKLDEKKQQSFLHITASQPSHAGIYLCGGD
>V170RF-JYKQ01026655.1-trav |(5208, 5498)|2.34144925142|(0.807,0.730,0.830)|-1
TIIDAKTTQPTSMDCAEGRAANLPCNHSTISGSEYVYWYRQIHSQEPQYVIHGLKNNETN
VMASLIITEDRKSSTLILPHATLRDTAVYYCIVRG
>V171RF-JYKQ01026663.1-trav |(902, 1202)|2.35351845765|(0.809,0.774,0.779)|-1
SSVAQKVTQTQSSVSMPVEKAVTLNCQYETSRWSYYLFWYKQPPSKEMIFLIRQGSSEPN
AKSGRYSVNFQKAASSIALTISALQLEDSATYFCALWE
>V172RF-JYKQ01026665.1-trav |(1710, 2010)|2.18976129046|(0.765,0.698,0.746)|-1
SSVAQKVTQAQSSVSMPVGKAVTLNCQYETSWWSYDLFWYKQPPSKEMIFLIRQGYSEQN
ARNGRYSVNFQKAASSIALTISALQLEDSATYFCALRE
>V173RF-JYKQ01026679.1-trav |(1538, 1826)|2.04313857487|(0.760,0.582,0.933)|-1
IQVEQSPPDLILQEGANSTLRCNYSATANNLQWFHQNPWGQLINLFYILSGTKQNGRLSA
TTVTKERYSLLHISSSQTTDSGIYFCAVESQCSP
>V174RF-JYKQ01042840.1-ighv |(1682, 1994)|2.36286941854|(0.911,0.741,0.840)|-1
VLSQLQLQESGPGLVRPSETLSLICTVSGGSISDSYYWNWIRQPPGKGLEWIGNIYGGGG
STNYNPSLKSRVTISKDASKNQFSLKLSSVTAADTAVYYCAR
>V175RF-JYKQ01042857.1-ighv |(1035, 1344)|2.79324867372|(0.969,0.987,0.874)|-1
AQSQVQLVQSGAEVKKPGASVKLSCKASGFTFGSYAISWVRQAPGQGLEWMGEIIPAFGI
ADYAQKFQGRVTITADTSTNTAYMELSSLRSEDTAVYYCAR
>V176RF-JYKQ01042859.1-ighv |(151, 465)|2.29437442212|(0.889,0.815,0.720)|-1
VLSQVTLKESGPALVKPTQTLTLTCTFSGFSISTSGMGVSWIRQPSGKALEWLALIYWND
DKYYSPSLKSRLTISKDTSKNQVVLTMTNMDPVDTATYYCARV
>V177RF-JYKQ01042861.1-ighv |(9368, 9683)|2.96942416586|(0.994,0.994,0.982)|-1
VQCEVQLVESGGGLVQPGGSLRLSCAASGFTFSDYYMYWVRQAPGKGLEWVGFIRSKAYG
GTAEYAASVKGRFTISRDDSKSIASLQMNSLRAEDTAVYYCTR
>V178RF-JYKQ01044654.1-igkv |(1250, 1550)|2.90929455551|(0.986,0.945,0.985)|-1
ARCDIQMTQSPSSLSASVGDKVTITCHASQGISSWLAWYQQKPGKAPKPLIYKASSLQSG
VPSRFSGSGSGTDFTLTISSLQPEDFATYYCQQNSSSP
>V179RF-JYKQ01044659.1-igkv |(1025, 1322)|1.65023352845|(0.819,0.597,0.595)|-1
TTGETVLTQSPATLYLSPGERATLSCRASQSVGSYLAWYQQKPGQAPRLLICGASSRAAG
IPARFSGSGSGTDFTLTISSLEPEDFAVYFCLQRETG
>V180RF-JYKQ01044662.1-igkv |(2570, 2870)|2.96436078502|(0.998,0.981,0.987)|-1
AKCDIQMTQSPPSLSASVGDRVTITCRASQGISNWLAWYQQKPGEAPKLLIYAASTLQSG
VPSRFSGSGSGTEFTLTISSLQPEDFATYYCQQHNSYP
>V181RF-JYKQ01052437.1-igkv |(14196, 14511)|2.3099850381|(0.922,0.697,0.881)|-1
SSGDVVMTQSPLSLPVTPGQPASISCRSSQSLVHSNGNTYLNWFQQKPGQPPRLLIYKVS
NRYSGVPDRFSGSGAGTDFTLKISRVEAEDVGIYYCMQSIHLP
>V182RF-JYKQ01052439.1-igkv |(123, 425)|2.67669264262|(0.944,0.960,0.827)|-1
SSGDVVMTQSPLSLSVTIGQPASISCRSSQSLVHSDGKTYLNWLQQKPGQPPRRLIYQVS
NRDSGVPDRFSGSGAGTDFTLKISRVETEDVGVYYCVQG
>V183RF-JYKQ01052440.1-igkv |(15476, 15787)|1.52031617586|(0.758,0.520,0.573)|-1
LASISCKSSQSLLGSDDKNIYLDWYLQKPGQSPQLLIYDVSSWASGVPDRFSGSGSGTDF
TLKISLVVAEEVGVYYCMQHTEFPSTVVHPGTESSLLGCPSC
>V184RF-JYKQ01052440.1-igkv |(29428, 29728)|2.89712851976|(0.995,0.943,0.972)|-1
ARCDIQLTQSPSSLSASVGDRVTITCQASQGISNNLAWYQQKPGKVPKLLIYAASTLQSG
VPSRFSGSGSGTDFTLTISSLQPEDFATYYCQHGYGTP
>V185RF-JYKQ01052440.1-igkv |(44786, 45101)|2.28842374066|(0.940,0.661,0.956)|-1
SSGDIVMTQTPFSLPVTPGEPASISCRSSQSLLHSDGRTYLYWYLQKPGQPPRLLIYRVS
NRFSGVPDRFSGSGSGTDFTLKISRVEAEDVGVYYCMQALQNP
>V186RF-JYKQ01052440.1-igkv |(49779, 50094)|2.51010685966|(0.939,0.780,0.895)|-1
SSGDIVMTQTPLSLPVTPGEPASISCRSSQSLLHSNGNTYLHWYLQKPGQSPQLLFYGGS
NRASGVPDRFSGSGSGTDFTLKISKVEAEDVGVYYCVQAIAFP
>V187RF-JYKQ01052440.1-igkv |(68584, 68899)|2.4016199592|(0.967,0.702,0.978)|-1
SSGDIVMTQTPLSLPVTAGEPASISCRSSQSLLHSNGNTYLYWYLQKPGQPPWLLIYRVS
NRFSGVPDRFSGSGSGTDFTLKISRVEAEDVGVYYCMQALQTP
>V188RF-JYKQ01052440.1-igkv |(90005, 90305)|2.98028822908|(0.997,1.000,0.984)|-1
ARCDIQMTQSPSSLSASVGDRVTITCRASQGISNYLNWYQQKPGKAPKLLIYRASNLETG
VPSRFSGSGSGTDFTLTISSLQPEDIATYYCQKHDNSP
>V189RF-JYKQ01052440.1-igkv |(99434, 99748)|1.67099130745|(0.960,0.727,0.594)|-1
SSGDVVMTQTPLSLPVTPGEPASISCRSSQSLLHSNGNTYLHWYLQKPGQSPRLLIYKVT
NRESGVPDRFSGSGSGTDFTLKISRVEPEDVGVYYCMQNTKAP
>V190RF-JYKQ01052440.1-igkv |(120035, 120335)|2.95702032645|(0.993,0.979,0.986)|-1
ARCDIQMTQSPSSLSASIGDRVTITCRASQNIYSNLAWYQQKPGKAPKPLIYYASSVETG
VPSRFSGSGSGTDYTLTISSLQPEDVATYYCQQYDNSP
>V191RF-JYKQ01052441.1-igkv |(8581, 8881)|2.98999600001|(0.997,0.997,0.996)|-1
ARCDILMTQSPASLSASVGDRVTITCRASQGISNYLAWYQQKPGETPKLLIYAASSLQSG
IPSRFSGSGSGTDFTLTISSLQPEDFATYYCQHYYSTP
>V192RF-JYKQ01052442.1-igkv |(12441, 12756)|2.35572907255|(0.954,0.736,0.868)|-1
TSGDIVMTQTPLSLPVTPGEPASISCRSSQSLLHSGGKTYLYWYLQKPGQSPQLLIQEVS
NRASGVPDRFSGSGSGTDFTLKISRVEAEDVGVYYCMQGIQLP
>V193RF-JYKQ01052443.1-igkv |(11550, 11850)|2.95354950736|(0.997,0.979,0.980)|-1
ARCDIQMTQSPSSLSASVGDRVTITCQASQSLSNYLNWYQQKPGKIPKLLIYGASSLQSG
IPSRFSGSGSGTDYTLTISSLQPEDFATYYCQQGYSNP
>V194RF-JYKQ01052443.1-igkv |(27506, 27821)|2.44921946831|(0.986,0.728,0.970)|-1
TSGDIVMTQTPLSLPVTLGEPASISCRSSQSLLHSDGYTYLDWYVQKPGQSPQLLIYLVS
NRASGVPDRFSGSGSGTDFTLKISRVEAEDVGVYYCMQGTQLP
>V195RF-JYKQ01052444.1-igkv |(11183, 11498)|2.22732378758|(0.982,0.646,0.964)|-1
YSGDIVMTQTPLSLPVIPGEPASISCRSSQSLLDSDGYTCLDWYLQKPGQSPQLLIYEVS
NRASGVPDRFSGSGSGTDFTLKISRVEAEDVGVYYCMQSIEFP
>V196RF-JYKQ01052444.1-igkv |(23082, 23397)|2.40190221903|(0.901,0.723,0.897)|-1
SSGDIVMTQTPLSLPVIPGEPASISCRSSQSLLRSDGYTYLHWYLQKPGQSPQLLIYLGS
NCASGVPDRFSGSGSGTDFTLKISRVEAEDIGIYYRMQNLQIP
>V197RF-JYKQ01052444.1-igkv |(27757, 28057)|2.83282969051|(0.914,0.976,0.971)|-1
ARCDIQMTQSPSSLSASVGDRVTITCRASQGINKELAWYQQKPGKAPMLLLYSGSSLHTG
VPSQFSGSGSGTDFTLTISSLQPEDVATYYCRQDYTTP
>V198RF-JYKQ01052444.1-igkv |(35903, 36218)|2.62050398514|(0.989,0.812,0.945)|-1
SSGDIVMTQTPLSLPVTPGQPASISCRSSQSLLHSDGYTYLHWYLQKPGQSPRLLIYLVS
NRASGVPDRFSGSGSGTDFTLKISRVETEDVGVYYCMQTLQTP
>V199RF-JYKQ01052444.1-igkv |(45830, 46130)|2.96019965751|(0.998,0.972,0.993)|-1
ARCDIQMTQSPSSLSASVGDRVTITCRASQGIGNYLAWYQQKPGETPKLLIYAASSLQSG
IPSRFSGSGSGTDYTLTISSLQPEDFATYYCQQGYSNP
>V200RF-JYKQ01052444.1-igkv |(60842, 61144)|2.39773083717|(0.988,0.742,0.908)|-1
TNGDIVMTQTPLSLPVTPGEPASISCRSSQSLLHSDGKTYLHWYLQKPGQSPQLLIYLVS
NRASGVPDRFSGSGSGTDFTLKISRVEVEDVGVYYCEQG
>V201RF-JYKQ01052450.1-igkv |(9881, 10181)|2.89578802605|(0.979,0.933,0.993)|-1
ARCDIQMTQSPSSLSASVGDRVTITCRASQSINKELDWYQQKPGKAPTLLIYAASSLQTG
VSSRFSGSGSGTDFTLTISSLQPEDVATYYCQQDYTTP
>V202RF-JYKQ01052451.1-igkv |(138372, 138687)|2.25549109059|(0.989,0.676,0.929)|-1
SRGDIVMTQTPLSLPVTPGEPASISCRSSQSLLHSNGYTYLHWYLQKPGQSPQLLIYLGS
NRASGVPDRFSGSGSGTDFTLKISRVEAEDVGVYYCEQTLQTP
>V203RF-JYKQ01056010.1-ighv |(10615, 10921)|2.95557605748|(0.984,0.993,0.979)|-1
VQCEVQLVESGGGLVQPGGSLRLSCAASGFTFSSYAMQWVHQAPGKGLEWVSAIGPGGDT
YYADAVKGRFTISRDNAKNSLYLQMNSLRAEDTAVYYCAR
>V204RF-JYKQ01056018.1-ighv |(1836, 2148)|2.67451549007|(0.876,0.892,0.913)|-1
VLSQVKLQQWGEGLVKPSETLSLTCAIYGGSISGYYYWSWIRQPPGKGLEWIGNIYGGGG
STNYNPSLKNRVTISKDTSKNQFSLKLSSVTAADTAVYYCAR
>V205RF-JYKQ01062878.1-ighv |(882, 1191)|2.94338299634|(0.998,0.982,0.968)|-1
VQCEVQLVESGGGLVKPGASLRLSCAASGFTFSSYGMHWVRQAPGKGLEWVSYISSDSSY
IYYADSVKGRFTISRDNAKNSLSLQMNSLKTEDTAVYYCAR
>V206RF-JYKQ01062881.1-ighv |(1585, 1894)|2.88810860018|(0.991,0.973,0.937)|-1
AHSQVQLVQSGAEVKKPGSSVKVSCKASGYTFTDYYMQWVRQAPGQGLEWMRWINPYNGN
TKYAQKFQGRVTMTRDTSTSTAYMELSSLRSEDTAVYYCAT
>V207RF-JYKQ01062881.1-ighv |(4488, 4803)|2.77686056337|(0.893,0.984,0.942)|-1
VQCEVQLVESGGGLVQPGGSLRLSCAASGFTFSNHCMSWVRQAPGKGLEWVGFIRNKAKG
GTAEYAASVKGRFTISRDDSKSIAILQMNSLKTEDTAMYYCTR
>V208RF-JYKQ01062939.1-trav |(3077, 3367)|2.15126635491|(0.749,0.652,0.796)|-1
TIIDAKTTQPTSMDCAEGRAANLPCNHSAISANEYIHWYRQIHSQGPQYVIHGLKDNETN
AMASLIITEDRKSSTLILPHATLRDTAVYYCILRV
>V209RF-JYKQ01066660.1-trav |(3004, 3294)|2.22340863347|(0.770,0.668,0.854)|-1
TIIDAKTTQPTSMDCAEGRAANLPCNHSTIGGNEYIHWYRQIHSQGPQYVIHGLKNNETN
AMASLIITEDRKSSTLILPHATLRDTAVYYCIVRV
>V210RF-JYKQ01066663.1-trav |(1183, 1482)|1.98444186018|(0.790,0.549,0.900)|-1
VNGQQIMQIPQYQHVQEGEDFTTHCNFSTTLSNIQWYKQRPGGHPVFLITLVKSREVKKQ
KRLTFKSGEAKKNSSLHITATQTTDVGTYFCAGHSAPQ
>V211RF-JYKQ01066669.1-trav |(750, 1050)|2.18976129046|(0.765,0.698,0.746)|-1
SSVAQKVTQAQSSVSMPVGKAVTLNCQYETSWWSYDLFWYKQPPSKEMIFLIRQGYSEQN
ARNGRYSVNFQKAASSIALTISALQLEDSATYFCALRE
>V212RF-JYKQ01075081.1-igkv |(781, 1078)|2.00262689626|(0.631,0.818,0.707)|-1
TTGETVLMQSPATLSLSPGERATLSCRASQSVSNRLAWYQQKPGQAPRLLIYGASSRATG
IPDRFSGSRSGTEFSLTISSLEPEDFAVYFCLQRVTG
>V213RF-JYKQ01075085.1-igkv |(254, 554)|2.92750885865|(0.968,0.975,0.986)|-1
ARCDIQMSQSPPSLSASVGDRVTITCQACQGISNYLAWYQQKPGKAPKLLIYAASTLQSG
VPSRFSGSGSGTEFTLTISSLQPEDFATYYCQQRNSYP
>V214RF-JYKQ01076935.1-igkv |(39827, 40127)|2.98866005261|(1.000,0.998,0.991)|-1
ARCDIQMTQSPSSLSASVGDTVTITCQASQGISDYLAWYQQKPGKAPKLLIYAASNLESG
VPSRFSGSGSGTEFTLTISSLQPEDFATYYCQQYDSDP
>V215RF-JYKQ01076937.1-igkv |(20686, 20986)|2.90773926526|(0.946,0.978,0.999)|-1
ARCDIQMSQSPSSLSASVGDRVTITCRASQGISNALAWFQQKPGKAPKLLIYAASSLQSG
VPSRFSGSGSGTDYTLTISSLQPEDFATYYCQQGYSTP
>V216RF-JYKQ01076937.1-igkv |(32283, 32583)|2.97442008525|(0.992,1.000,0.983)|-1
ARCDIQMTQSPSSLSASVGDRVTITCRASQGISSYLNWYQQKPGKAPKLLIYYATSLESG
VPSRFSGSGSGTEFILTISSLQPEDFATYYCQQHNSYP
>V217RF-JYKQ01076937.1-igkv |(51727, 52015)|2.62179510628|(0.972,0.842,0.896)|-1
IVMTQSPATLSLSLGETATISCRTSQSVGRKLAWYQQKPGQAPRLLIYGASSRATGIPDR
FSGSGSGTDFTLTISSLEPEDFAVYYCQETSNLS
>V218RF-JYKQ01080923.1-iglv |(25992, 26293)|2.19567801843|(0.814,0.633,0.902)|-1
VQAGLTQPPSVSKGLKQTATLTCTGNSNNVGNQGAAWLQQHQGHPPKLLSYRNNNRPSGI
SERFSASRSGNTASLTITGLQPEDEADYYCSAWDSSLS
>V219RF-JYKQ01080923.1-iglv |(36388, 36700)|2.79921648788|(0.957,0.880,0.990)|-1
SWAEVVFTQPHSVSGSPGQTVTISCTRSSGSIDSKYVQWYQQRPGSAPTTVIYEDNKRPS
GVPDRFSGSIDSSSNSASLTISGLKSEDEADYYCQSADGSYT
>V220RF-JYKQ01080923.1-iglv |(73004, 73324)|2.12109142882|(0.865,0.676,0.758)|-1
SLSQPVLTQSPSASASLGASVKLTCTLSSGHSSYTIAWHQQQQGKAPRYLMWLKSDGSHS
KADGIPDRFSGSSSGADRYLTISNLQSEDEADYYCHTWNTGIHTV
>V221RF-JYKQ01081225.1-igkv |(3273, 3573)|2.9388502378|(0.987,0.990,0.964)|-1
ARCDIQMTQSPSSLSASVGDKVTITCQASQSISSWLTWYQQKPGKAPKLLIYKASTLQSG
VPSRFSGSGSGTEFTLTISSLQPEDFATYYCQQFSSAP
>V222RF-JYKQ01098165.1-iglv |(3777, 4077)|2.34191661741|(0.946,0.832,0.753)|-1
QSVLTQPPSVSGALGQRVTISCSGSGSNIGSNDVYWYQQFPGTAPKLLIYDNNQRPSGVP
DRFSGSKSGTSASLAISGLQPGDEADYYCAAWNDSLSG
>V223RF-JYKQ01098166.1-iglv |(974, 1284)|2.56038548971|(0.951,0.876,0.821)|-1
SLSQPMLTQPASLSASPGASASLTCTFSGGINVAGYYIYWYQQKPGSPPRYLLKYKSDSD
KHQGSGVPSRFSGSKDASANTGILRISGLQSEDEADYYCAI
>V224RF-JYKQ01126536.1-iglv |(5084, 5382)|1.98770698581|(0.789,0.566,0.816)|-1
LCALPVLTQPPSASASLGASVKLTCTLSSEHSNYFIIWYQQRPGRSPRYIMKVNSDGTHS
KGDGIPDRFLGSSSGADRYLTISNLQSDDEAEYYCGE
>V225RF-JYKQ01126539.1-iglv |(7505, 7803)|1.8766398748|(0.785,0.566,0.718)|-1
LCALPVLTQPPSASASLGASVKLTCTLSSEHSNYFIIWYQQRPGRSPRYIMKVNSDGTHS
KGDGIPDRFLGSSSGADRYLTISNLQSDDEAEYYCGE
>V226RF-JYKQ01126545.1-iglv |(13640, 13950)|2.86533586923|(0.991,0.932,0.960)|-1
SWAQAALTQPPSVSGSPGQSVTISCTGTSSDIGGYNYVSWYQQHPGKAPKLMIYDVSKRP
SGVSDRFSGSKSGNTASLTISGLQAEDEADYYCSSYASSST
>V227RF-JYKQ01126545.1-iglv |(37351, 37660)|2.89647496801|(0.981,0.944,0.977)|-1
PAASYELTQPPSVSVSPGQTARITCSGDALPEKYAYWYQQKPGQSPVLIIYEDSKRPSGI
PERFSGSSSGTVATLTISGAQVEDEADYYCYSADSSGNQHS
>V228RF-JYKQ01126545.1-iglv |(44839, 45135)|2.21829982746|(0.887,0.635,0.927)|-1
SVASYELTQPLSVSVALGQMARITCGGNNIGRKYVYWYQQKPDQAPVLVIYEDSKRPSGI
PERFSGSNSGNMATLTIDGAQARDEADYYCQVWDSST
>V229RF-JYKQ01126545.1-iglv |(48188, 48491)|2.65341399606|(0.980,0.817,0.959)|-1
SWAQAALTQPHSVSGSPGQSVTISCTGTSSDIGGYDRVSWYQQHPGKAPKLMIYEVSKRP
SGVSDRFSGSKSGNTASLTISGLQAEDEADYYCSSYAGS
>V230RF-JYKQ01126545.1-iglv |(71572, 71866)|2.61733612255|(0.855,0.873,0.898)|-1
QSALIQSPSVSGSLGQSVTISCTGTSSDIGRYNYVSWYQQQPGTTTKLMMYNVNTRPSGV
SDRFSGSKSGNTASLTISGLQAEDEADYYCSSYEAS
>V231RF-JYKQ01126546.1-iglv |(14999, 15304)|2.63634274059|(0.940,0.822,0.929)|-1
SVASYELTQPPSVSVSPGQTAKITCSGDVLAKYYAHWFQQKPGQAPVLVIYKDSERPSGI
PERFSSSSSGTTVTLTISGAQAEDEADYYCYSGDDNNLTV
>V232RF-JYKQ01126546.1-iglv |(24524, 24827)|2.88884201202|(0.994,0.932,0.979)|-1
SWAQSALTQPPSVSGSPGQSVTISCTGTSSDVGGYSYVSWYQQHPGKAPKLMIYGVSNRP
SGVSDRFSGSKSGNTASLTISGLQAEDEADYYCCSYTTS
>V233RF-JYKQ01126546.1-iglv |(36976, 37279)|2.59605092094|(0.974,0.810,0.924)|-1
SAASYDLTQPPSVSVSPGQTARITCGGDNIESEAVHWYQQKPPQAPVLVIYADSERPSGI
PERFSGSKSGNTATLTISGVEAGDEADYYCQMWDSSSKH
>V234RF-JYKQ01126546.1-iglv |(44080, 44383)|1.82960530016|(0.953,0.728,0.646)|-1
SVVSSELTQESALSVALGQTVRITCQGDSLSSYYASWYQQKPGQVPVLVIYGNTNRPSGI
PGRFSGSWSGNTASLTITGAQVEDEADYYCGSWDNSGNH
>V235RF-JYKQ01126546.1-iglv |(60437, 60740)|2.70439333583|(0.978,0.844,0.954)|-1
SAASYDVTQPRSVSVSPGQTARITCGGDNIGSKYVQWYQQKPAQAPVLVIYDNSDRPSGI
PERFSGSNSGNTATLTISGVEAGDEADYYCQVWDSSSDH
>V236RF-JYKQ01126546.1-igkv |(65229, 65532)|1.9827430783|(0.758,0.613,0.704)|-1
SVVSSELTQEPALSVALGHTVSMTCQGDSLKTYYASWYQQKPGQVPVLVIYGNNYRPSGI
PGRFSVSWSGNTGSLTITAAQVEDEADYYCNSWDSSGNH
>V237RF-JYKQ01126546.1-iglv |(71769, 72072)|2.80322227004|(0.983,0.928,0.920)|-1
SWAQAALTQPPSVSGSPGQSVTISCTGTSNDVGGYNYVSWYQQHPGKALKLMIYEVSKRP
TGVSDRFSGSKSGNTASLTISGLQAEDEADYYCGSYSGS
>V238RF-JYKQ01126546.1-iglv |(81293, 81590)|2.00545358595|(0.738,0.572,0.903)|-1
SVASYELTQPPLVSVSPGQTARISFSGDILKENYADWYQQKPGQAPVLVIYEDSKRPSGI
PERFSGSTSGDTTTLTISSTLSEDEADYSCFSGNENN
>V239RF-JYKQ01126546.1-iglv |(89596, 89899)|2.44195646749|(0.970,0.770,0.881)|-1
SAASYDVTQPRSVSVSPGQTARITCGGDSIGSKVVNWYQQKPAQAPVLVIYADSVRPSGI
PERFSGSNSGNTATLTISGIEAGDEADYYCQVWDSSSDH
>V240RF-JYKQ01126546.1-iglv |(116413, 116723)|2.84846185501|(0.997,0.968,0.914)|-1
SWAQSALTQPPSVSGSPGQSVTISCTGTSSDVGGYNYVSWYQQHPGKAPKLMIYEVSKRP
SGVSDRFSGSKSGNTASLTISGLQAEDEADYYCSSYRSSNT
>V241RF-JYKQ01126579.1-iglv |(22005, 22315)|2.56617219616|(0.954,0.882,0.820)|-1
SLSQPVLTQPASLSASPGASASLTCTFSGGINVAGYYIHWYQQKPGSPPRYLLRYKSDSD
KHQGSGVPSRFSGSKDASANTGILRISGLQSEDEADYYCAI
>V242RF-JYKQ01126579.1-iglv |(26551, 26860)|2.57176053471|(0.919,0.827,0.869)|-1
SWAQSVLTQPRSASEAARKSVTISCSGSSSNIGSNYVSWYQQLPETAPKLLIYYDDLRAS
GVSDRFSGSKSGTSASLAISGLQTEDEADYYCAAWDDSLSG
>V243RF-JYKQ01126579.1-igkv |(50868, 51190)|2.19637110547|(0.867,0.735,0.732)|-1
SLSQSVLTQPPSFSTSGASASLTCTLRSDINVSRYRIYWYQQKPESPPRYLLSYYSDSYK
HQGSGVPSRFSGSKDASVNAGLLLISGLQPEDEADYYCKTGYGNA
>V244RF-JYKQ01126580.1-iglv |(2043, 2350)|2.89267367457|(0.987,0.945,0.969)|-1
SWAQSVLTQPPSVSGDPGQRVTISCTGSSSNIGGYDVYWYQQVPGTAPKLLIYDNNKRPS
GVSDRFSGSKSGTSASLTITGLQTEDEADYYCQSYDSSLS
>V245RF-JYKQ01126580.1-iglv |(7851, 8158)|2.83087356572|(0.918,0.970,0.961)|-1
SWAQSVLTQPPSVSGAPGQKVTISCTGSSSNIGGYNVYWYQLLPGTAPKLLIYDNNKRPS
GISDRFSGSKSGTSASLAITGLQSEDEADYYCQSYDSSLS
>V246RF-JYKQ01126581.1-iglv |(5729, 6039)|2.77368220432|(0.969,0.924,0.905)|-1
SLSQPVLTQPASLSASPGASARLTCTLSSGINVGSYSIYWYQQKPGSPPRYLLYYYSDSD
KHQGSGVPSRFSGSKDASANAGLLLISGLQSEDEADYYCAI
>V247RF-JYKQ01126581.1-iglv |(16324, 16633)|2.56426742506|(0.948,0.767,0.975)|-1
SWAQSVLTQPPSVSAAPGQRVTISCSGSSSNIGRGYVSWYQQLPGTAPKLLIYDNNKRPS
GISDRFSGSKSGNSASLTITGLQTGDEADYYCGAWDSSLSA
>V248RF-JYKQ01126581.1-iglv |(20501, 20808)|2.91756228963|(0.984,0.961,0.975)|-1
SWAQSVLTQPPSVSGAPGQRVTISCTGSSSNIGGYYVQWYQQLPGTAPKLLIYGNNKRPS
GVSDRFSGSQSGTSASLAITGLQSEDEADYYCEAWDNSLS
>V249RF-JYKQ01126585.1-iglv |(7447, 7757)|2.53901845815|(0.965,0.785,0.919)|-1
SLSQPVLTQPASLSASPGASVRLTCTLRSGISVGGYNIHWYQQKPGSPPRYLLYYYSDSN
KGQGSGVPSRFSGSKDASANAGILLISGFQSEDEADYYCTT
>V250RF-JYKQ01126585.1-iglv |(12290, 12599)|2.85550966025|(0.980,0.907,0.990)|-1
SWAQSVLTQPPSASGAPGQRVTISCSGSSSNIGSNYVSWYQQLSGKAPKLLIYKNNQRPS
GVPDRFSGSKSGNSASLAISGLQSEDEADYYCAAWDDSLSG
>V251RF-JYKQ01126586.1-iglv |(1288, 1598)|2.57457391657|(0.953,0.877,0.828)|-1
SLSQPMLTQPASLSASPGASASLTCTFSGGINVAGYYIHWYQQKPGSPPRYLLRYKSDSD
KHQGSGVPSRFSGSKDASANTGILRISGLQSEDEADYYCAI
>V252RF-JYKQ01126586.1-iglv |(6152, 6459)|2.57232981049|(0.817,0.915,0.918)|-1
SWAQSVLTQPPSASGAPGQSVTISCSGSSSNIRGNGVHWYQQLSGTAPKLLIYNNNQRPS
GVPDRFSGSKSGTSASLTITGLRSEDEAHYYCEAWDNSLS
>V253RF-JYKQ01126586.1-iglv |(15224, 15531)|1.84291546959|(0.789,0.728,0.548)|-1
SNSQAVVTQEPSMTVFPGGTVTLTCASSTGAVTSGHSPHWFQQKPGQAPRTLIYNTNYKH
SWTPARFSGSLLGGKAALTLSGAQPEDEAEYYCWLHYSGA
>V254RF-JYKQ01126588.1-iglv |(5339, 5646)|2.36035508527|(0.875,0.945,0.689)|-1
SNSQAVVTQEPSLTVSPGGTVTLTCASSTGAVTSSNYPSWYQQKPGQAPRALIYNTNSKY
SWTPARFSGSLAGGKAALTLSGAQPEDEAEYYCLLYYSSA
>V255RF-JYKQ01126589.1-iglv |(2854, 3164)|2.90136442834|(0.991,0.950,0.969)|-1
SWAQSVLTQPPSVSGAPGQRVTISCTGSSSNIGAGYYVQWYQQLPGTAPKLLIYENNKRP
SGVTDRFSGSKSGTSASLTITGLQSEDEADYYCQSYDSSLS
>V256RF-JYKQ01126589.1-iglv |(17863, 18164)|1.68725236388|(0.552,0.856,0.596)|-1
SLSQPVLTQPPSASASLGASVTLTCTLSSGYSNYAVDWHQQKPGKGPRFVMRVGTGGIVG
SKGDGIPDRFSGSGSGLNRYLTIKNIQEEDESDYHCGV
>V257RF-JYKQ01126589.1-iglv |(33453, 33763)|2.60629056851|(0.968,0.842,0.885)|-1
SLSQPVLTQPTSLSASPGASARLTCTLRSGISVGSYRIYWYQQKPGSPRRYLLNYYSDSD
KHQGSGVPSRFSGSKDASANAGILLISGLQPEDEADYYCMI
>V258RF-JYKQ01126589.1-iglv |(38258, 38567)|2.85416172767|(0.991,0.904,0.989)|-1
SWAQSVLTQPPSASGAPGQRVTISCSGSSSNIGSNYVYWYQQFPGTAPKLLIYYSNQRPS
GVPDRFSGSKSGTSASLAITGLQSEDEADYYCAAWDNSLSG
>V259RF-JYKQ01131116.1-trbv |(35700, 35994)|1.65390318191|(0.784,0.521,0.655)|-1
VRSQTIHQWPATLVQPVGSRLSLECTVEGTSNPNLYWYRQAAGRGLQLLFYSVGVGQISS
EVPQNLSASRPQDRQFILSSKKLLLSDSGFYLCAWS
>V260RF-JYKQ01135395.1-trdv |(125257, 125563)|1.88926073845|(0.658,0.564,0.878)|-1
RGMLCDKVTQSSPDQMVASGSEVVLLCTYDSTYSDPGLFWYRIRPDYNFQFVIYGDESRS
HGAYFAQGRFSVKHLLTQRAFHLVISPVRTEDSATYYCAM
>V261RF-JYKQ01187338.1-igkv |(11159, 11459)|2.33116860054|(0.741,0.871,0.797)|-1
TTGQVILTQSPATLSLSPGERATLSCRASQSVSSYLAWYQQKPGQAPRLLIHSVSSRATG
IPDRFSGSGSGTEFTLTISSLEPEDVGVYHCYQHSSGY
>V262RF-JYKQ01187347.1-igkv |(14093, 14411)|2.73740999771|(0.971,0.843,0.988)|-1
ACGDIVMTQSPDSLAVSLGERVTINCKSSQSLLYSSNNKNYLAWYQQKPGQAPKLLISWA
STRESGVPNRFSGSGSGTDFTLTISGLQAEDVAVYYCQQHYSSP
>V263RF-JYKQ01237599.1-ighv |(479, 788)|2.92772550775|(0.979,0.959,0.992)|-1
VQGEVQLVESGGGLSKPGGSLRLSCAASGFTFSDYNMHWVRQASGKGLEWVSGISNDGGS
TWYADSVKGRFTISRENAKNTLYLQMNSLRAEDTAVYYCAG
>V0RF-AQIB01018214.1-trgv |(163723, 164036)|2.48808706409|(0.920,0.852,0.795)|1
SQKSSNLEGRTKSVTRPTGSSAEITCDLPEVSSFYIHWYLHQEGKAPQRLLYYDTSNSRV
VLESGISSGKYDSYGSTRRNLRLILRNLIENDSGVYYCANWD
>V1RF-AQIB01018215.1-trgv |(1470, 1783)|2.47631281765|(0.915,0.762,0.891)|1
SQKSSNLEGRTKSVTRPTGSSAEITCDFSGDSNFYIHWYLHQEGKAPQRLLYYDVSNSRD
VLESGLSPGKYYTHTRKRWSWILILRNLIENDSGVYYCANWN
>V2RF-AQIB01018217.1-trgv |(6282, 6595)|2.40675752244|(0.900,0.852,0.750)|1
SQKSSNLEGRTKSVTRPTGSSAEITCDLPEVSSFYIHWYLHQEGKAPQRLLYYDSSNSRV
VLESGISSGKYNSYESTRRSLRLRLQNLIENDSGVYYCANWD
>V3RF-AQIB01018219.1-trgv |(13822, 14144)|1.54108797663|(0.771,0.588,0.524)|1
YVYGAGHLEQPQISSTKMLSKTARLECVVSGVTISETSIYWYRERPGEVIQFLVCILYDG
TVRKESSIPSGKFEVDRIPKTSTSTLTIHNVQKQDIATYYCALWE
>V4RF-AQIB01144236.1-igkv |(33225, 33525)|2.96431671213|(0.979,0.994,0.993)|1
ARCDIQMTQSPSSLSASVGDRVTITCRASQGINKELSWYQQKPGKAPTLLIYAASSLQTG
VPSRFSGSGSGTDFTLAISSLQPEDVATYYCLQDYTTP
>V5RF-AQIB01144236.1-igkv |(51256, 51574)|1.85273038489|(0.869,0.527,0.835)|1
SSGDIVMTQTPLFLPVTPGEPASISCRSSQSLMDSDVGFTYLHWYLQIPGQSPQLLMYFT
SYRASGVPDRFSGSGSGTDFTLEISKVEAEDIGVYYCMQGRELP
>V6RF-AQIB01144236.1-igkv |(99005, 99323)|2.65131143798|(0.974,0.842,0.916)|1
SSGDIVMTQTPLSLPVTPGEPASISCRSSQSLLDSDDGNTYLDWYLQKPGQSPQLLIYEV
SNRASGVPDRFSGSGSDTDFTLKISRVEAEDVGVYYCMQTIEYP
>V7RF-AQIB01144237.1-igkv |(7567, 7868)|2.40158400656|(0.906,0.700,0.966)|1
TSGDILLTQTPLSLPVTPGQLASISCRSSQSLLHSNGNTYLHWYLQEPGQSPQLLIYEVS
NRASGVPDRFSGSGSDTDFTLKINLVEAEDVGVYYCMQ
>V8RF-AQIB01144237.1-igkv |(12519, 12834)|2.10493045702|(0.905,0.908,0.601)|1
SSGDIVMTQTPLSLPVTLGEQASISCRSSQSLVYSDGKTYLNWYLQKPGQSPQLLMYLVS
KRASGVPDRFSGRGSGTDFTLKISRVEAEDVGVYYCMQALRSP
>V9RF-AQIB01144237.1-igkv |(16005, 16313)|1.84328551486|(0.712,0.642,0.578)|1
PASISCRSSQSLLHSDGYTYLHWYLQKPGQSPQLLIYLGSNCASGVPDKFSGSGSGTDFT
LKISRIEAEDIGIYYRVQNLQIPSTVLHPQTETSLLGLPSC
>V10RF-AQIB01144237.1-igkv |(20593, 20893)|2.35383049487|(0.948,0.942,0.693)|1
ARCDIQMTQSLSSLSASVGDRVTITCRASQGINNELAWYQQKPGKAPMLLLYSGSSLHTG
VPSRFSGSGSGTDFTLAISSLQPEDVAPYYCLQDYTTP
>V11RF-AQIB01144237.1-igkv |(28737, 29052)|2.16630934736|(0.973,0.633,0.936)|1
SSGDIVMTQTPLSLPVTPGEPASISCRSSQSLLDSYGYTNLNWYLQKPGQSPQLLIYLGS
NRASGVPDRFSGSGSGTDFTLKISGVEAEDVGVYYCMQGIQLP
>V12RF-AQIB01144240.1-igkv |(12918, 13233)|2.70231512004|(0.984,0.850,0.944)|1
TSGDIVMTQTPFSLPVNPGEPASISCRSSQSLSDSDGYTYLYWYLQKPGQSPQLLIYLGS
NRASGVPDRFSGSGSGTDFTLKISRVEAEDVGVYYCMQGIQLP
>V13RF-AQIB01144242.1-igkv |(6923, 7238)|2.31243309631|(0.966,0.723,0.870)|1
SSGDIVMTQTPLSLPVTPGEPASISCRSSQSLLHSDGYTYLYWYVQKPGHSPQLLIYLVS
NRASGVPDRFSGSGSGTDFTLKISRVEAEDVGVYYCLQGIQLP
>V14RF-AQIB01144242.1-igkv |(18230, 18530)|2.89169918413|(0.989,0.929,0.988)|1
ARCDIQMTQSPSSLSASVGDRVTITCQGSQSLSNFLNWYQQKPGKIPKLLIYRASSLQSG
IPSRFSGSGSGTDYTLTISSLQPEDFATYYCQQGYSYP
>V15RF-AQIB01144242.1-igkv |(33676, 33991)|2.58321033797|(0.987,0.783,0.968)|1
TSGDIVMTQTPLSLPVTPGEPASISCRSSQSLLHSNGYTYLDWYVQKPGQSPQLLIYLVS
SRASGVPDRFSGSGSGTDFTLKISRVEAEDVGVYYCMQGTQLP
>V16RF-AQIB01144243.1-igkv |(9275, 9590)|2.27221743383|(0.964,0.663,0.950)|1
TSGDIVMTQIPLSLPVTPGEPASISCRSSQSLLHSGGKTYLYWYLQKPGQSPQLLIYELS
NRASGVPDRFSGSGSGTDFTLKISGVEAEDVGVYYCMQGIQLP
>V17RF-AQIB01144243.1-igkv |(18759, 19059)|2.96608424741|(0.999,0.972,0.998)|1
ARCDIQMTQSPSSLSASVGDRVTITCQASQGITNDLAWYQQKPGETPKLLIYEASSLQSG
IPSRFSGSGSGTDFTLTISSLQPEDFATYYCQHYYSTP
>V18RF-AQIB01144243.1-igkv |(52384, 52684)|2.98374003277|(0.997,0.989,0.998)|1
ARCDIQMTQSPSSLSASVGDRVTISCRASQNIYSNLAWYQQKPGKTPKLLIYAASSLQSG
IPSRFSGSGSGTDFTLTISSLQPEDYATYYCQHHYGTP
>V19RF-AQIB01144244.1-igkv |(12759, 13074)|2.33585759025|(0.962,0.675,0.981)|1
SSGDIVMTQTPLSLPVTPGEPASISCRSSQSLLHSDGRTYLYWYLQKPGQPPRLLIYTVS
NRFSGVPDRFSGSGSGTDFTLKISRVEAEDVGVYYCMQALQNP
>V20RF-AQIB01144247.1-igkv |(9074, 9389)|2.46871897501|(0.964,0.724,0.989)|1
SIGDIVMTQTPLSLPVTPGEPASISCRSSQSLLHSNGNTYLYWYLQKPGQPPQLLIYRVS
NRFSGVPDRFSGSGSGTDFTLKISRVEAEDVGVYYCMQALQTP
>V21RF-AQIB01144251.1-igkv |(6848, 7148)|2.91355466254|(0.982,0.976,0.958)|1
ARCDIQMTQSPSSLSASVGDRVTITCHASQGISNWLAWYQQKPGKAPKLLIYYASNLETG
VPSRFSGSRSGTDFTVTISSLQPEDIATYYCQQYDNFP
>V22RF-AQIB01144257.1-igkv |(11968, 12268)|2.78887311658|(0.951,0.988,0.877)|1
ARCDIQMTQSPSSLSASVGDRVTITCRASQGINNYLSWYQQKPGKAPKPLIYYASSLETG
VPSRFSGSGSGPDYTLTISSLQPEDIATYYCQQYDNFP
>V23RF-AQIB01144258.1-igkv |(1398, 1700)|2.41481647997|(0.887,0.749,0.856)|1
FSADVVMTQSPLSLPVTPGQPASITCRSSQSLLHSNGNTYLNWFLQKPGQPPRRLIYTVS
NRDSGVPDRFSGSGAGTDFTLKISRVEAEDVGVYYCMQV
>V24RF-AQIB01144263.1-igkv |(12287, 12589)|2.28197543523|(0.921,0.677,0.898)|1
SSGDVVMTQSPLSLPVTLGQPVSISCRSSQSLVHSDGKTYLNWLQQKPGQPPRLLIYQVS
NRYSGVPDRFSGSGAGTDFTLKISRVEAEDVGVYYCMQG
>V25RF-AQIB01144263.1-igkv |(20713, 21015)|2.38746241966|(0.912,0.775,0.812)|1
SSGDVVMTQSPLSLPVTPGQPASISCRSSQSLVHSDGKTYLNWFQQKPGQPPRRLIYQVS
SRDSGVPDRFSGSGAGTDFTLKISRVEAEDVGVYYCVQG
>V26RF-AQIB01144263.1-igkv |(50626, 50941)|2.48533040743|(0.993,0.740,0.979)|1
SSGDIVMTQTPLSLPVTLGEPASISCRSSQSLVYSDGKTYLDWYLQKPGQSPQLLIYYGS
NRASGVPDRFSGSGSGTDFTLKISSVEAEDVGVYYCMQAIQTP
>V27RF-AQIB01144263.1-igkv |(59031, 59331)|2.65683118662|(0.985,0.918,0.846)|1
TRCAIQMTQSPSSLSASVGDRVTITCWASQSIGSNLAWYQQKPGKVPKLLIYAASTLQSE
VPSRFSGSGSGTDFTLSISSLQPEDVATYYCQKCDSAH
>V28RF-AQIB01144263.1-igkv |(96224, 96526)|2.45773163337|(0.920,0.839,0.790)|1
STGDVVMTQSPLSLPVTPGEPASISCRSSQSLLHSSGNTYLSWFQQKPGQSPRRLIYKVS
NRDSGVPDRFTGSGAGTDFTLKISRVEAEDVGVYYCMEG
>V29RF-AQIB01144264.1-igkv |(29331, 29633)|2.45773163337|(0.920,0.839,0.790)|1
STGDVVMTQSPLSLPVTPGEPASISCRSSQSLLHSSGNTYLSWFQQKPGQSPRRLIYKVS
NRDSGVPDRFTGSGAGTDFTLKISRVEAEDVGVYYCMEG
>V30RF-AQIB01144264.1-igkv |(45678, 45976)|2.69902544523|(0.972,0.820,0.998)|1
SKGEIVLTQSPAFRSVTLKEKVTITCQASQSIGSSLHWYQQKPDQSPKLLIKYASQSISG
VPSRFSGSGSGTDFTLTINSLEAEDAATYYCQQSSSF
>V31RF-AQIB01144264.1-igkv |(72133, 72421)|2.71035819824|(0.987,0.834,0.979)|1
IVLTQSPATLSLSPGETATLSCRASQSVGSSLAWYQQKPGQVPRLLIYGASSRATGIPDR
FSGSGSGTEFTLTISSLQPEDFAVYYCQKYSSSP
>V32RF-AQIB01144264.1-igkv |(77620, 77920)|2.57117457484|(0.934,0.956,0.777)|1
VRCDIQMTQSPSFLSASVGDRVTITCQASQSISNDLAWYQQKPGKSPTLLICDATNLHTG
VPSWFSGSGSGADYYLTISSLELEDFAAYYCQQEYSYP
>V33RF-AQIB01144264.1-igkv |(103470, 103785)|2.17494826|(0.787,0.675,0.764)|1
SSGDIVMIQTPLSLPVTPGEPASISCRSSQNLLHSDGNTYLHWYLQKPGQSPQLLIYGGS
NRFAGVPDRFSGSGSATDFTMKISRVEAKDVGVYYCMQGIQFP
>V34RF-AQIB01144265.1-igkv |(9151, 9443)|2.8158427581|(0.976,0.885,0.988)|1
SRGDIVMTQSPAFVSVTPGEKVTITCQASEGISNYLHWYQQKPDQAPKLLIQYASQSISG
VPSRFTGSGSGTDFTFTISSLEVEDAATYYCQQGN
>V35RF-AQIB01144265.1-igkv |(25389, 25680)|2.86449304411|(0.963,0.959,0.944)|1
DIQMTQSPSSLSASVGDRVTITCQASQSFSSSLAWYQQKPGKAPKLLIYAASSLQSGVPS
RFSGSKAGTDFTLTISSLQPEDVATYYCQQYYSTP
>V36RF-AQIB01144265.1-igkv |(40570, 40862)|2.95383291276|(0.996,0.993,0.968)|1
AKCDIQMTQSPSSLSASVGDRVTITCRASQTISSYLAWYQQKPGKVPKLLIYAASSLESG
IPSRFSGSGSGTEFTLTISSLQPEDFATYYCQQHN
>V37RF-AQIB01144265.1-igkv |(60992, 61284)|2.92383600705|(0.975,0.979,0.970)|1
ARCDIQMTQSPSSLSASVGDRVTVTCRASQGISNYLSWYQQEPGKAPKLLIYAASSLESG
VPSRFSGSGSGTEFTLTISSLQPEDFATYYCLQHN
>V38RF-AQIB01144265.1-igkv |(75665, 75964)|2.84011068476|(0.979,0.942,0.933)|1
TTGEIVMTQSPATLSLSPGERATLSCRASQSVSSYLAWYQQKPGQAPRLLIYGASSRATG
IPDRFSGSGSGTEFTLTISSLEPEDVGVYYCQQYNNWN
>V39RF-AQIB01144265.1-igkv |(84906, 85206)|2.9388103373|(0.998,1.000,0.950)|1
ARCDIQMTQSPSSLSASVGDRVTITCRASQGISNYLNWYQQKPGKAPKLLIYSASRLQSG
VPSRFSGSGSGTEFTLTISSLQPEDFATYYCEQFKNYL
>V40RF-AQIB01144269.1-igkv |(1727, 2027)|2.64291458457|(0.892,0.919,0.844)|1
STGEIVMTQSPATLSLSPGETTTLSCSASQSVGSYLAWYQQKPGQAPKLLIHSAYFRATG
IPDRFSGSGSRTVFTLTISSLEPEDVGVYYCQQYNDLP
>V41RF-AQIB01144269.1-igkv |(40447, 40747)|2.93289226661|(0.990,0.983,0.963)|1
ARCDIQLTQSPSSLSASVGDRVTITCRASQGISSYLAWYQQKPGKAPKLLIYDASNLQSG
VPSRFSGSGSGTEFTLTISSLQPEDFATYYCQQRNSLP
>V42RF-AQIB01144273.1-igkv |(1759, 2059)|2.98041612211|(0.999,0.988,0.994)|1
ARCDIQMTQSPSSLSVSVGDRVTITCRASQGISNYLSWYQQKPGKAPKLLIYSASSLESG
VPSRFSGSGSGTDYTLTISSLQPEDFAAYYCLQYQSIP
>V43RF-AQIB01144273.1-igkv |(12272, 12572)|2.41386260567|(0.953,0.809,0.810)|1
TTREIVFTQSPATLSLSPGERATLSCRASQSVGSSLAWYQQKSGQAPRLLVYHASSRATG
IPARFSGSGSGTDFTLTISSLEPEDVGVYYCQKYNDWP
>V44RF-AQIB01144273.1-igkv |(55407, 55707)|2.71997388929|(0.964,0.970,0.843)|1
ARCDIQMTQSPSSLSASVGDRVTITCRASQGISNALAWYQQKPGKVPKLLIYAASSLQSG
LPSGFSGSGSGTEFTLTISSLQPEDFATYYCQQGYSTP
>V45RF-AQIB01144273.1-igkv |(67090, 67390)|2.99696400065|(1.000,1.000,0.997)|1
ARCDIQMTQSPSSLSASVGDRVTITCRASQGISNNLAWYQQKPGKAPKLLIYDATTLQSG
VPSRFSGSGSGTEFTLTISSLQPEDFATYYCQQYNSYP
>V46RF-AQIB01144273.1-igkv |(86428, 86728)|2.17781415916|(0.953,0.868,0.666)|1
TTGEIVMTQSPATLSLSPGETATLSCKTSQSVGSKLAWYQQKPGQAPRLLIYGASSRATG
IPARFSGSGSGTDFTLAISSLEPEDVGAYYCQETSSLS
>V47RF-AQIB01144274.1-igkv |(43133, 43433)|2.55302459162|(0.962,0.877,0.820)|1
ARCDIQMTQSPSSLSASVGDTVTITCPASQGISSYLNWYQHKPGKAPKLLIYYATTLQSG
VPSRFSGSGSGTEFTLTISSLQPEDFAAYYCQQYKSLP
>V48RF-AQIB01144274.1-igkv |(49577, 49877)|2.94404987297|(0.990,0.968,0.988)|1
ARCDIQMTQSPSSLSASVGDKVTITCHASQGISSWLAWYQQKPGKAPKLLIYKASSLQSG
VPSRFSGSGSGTDFTLTISSLQPEDFATYYCQQITSAP
>V49RF-AQIB01144274.1-igkv |(65782, 66082)|2.17659742902|(0.951,0.617,0.970)|1
TTGEIVMTQSPATLALSPGERATLSCRTSQSVSSRLAWYQQKPGQAPRLLIYDASSRATG
IPDRFSGSGSGTEFTLTISSLEPEDVGVYYCQQDYSWP
>V50RF-AQIB01144276.1-igkv |(25002, 25302)|2.85888400513|(0.952,0.950,0.957)|1
ARRDIQMSQSPSSLSASVGDRVTITCHASQGISSWLAWYQQKPGKAPKLLIYKASSLQSG
VPSRFSGSGSGTDFTLTISSLQPEDFATYYCLQYDSNP
>V51RF-AQIB01144276.1-igkv |(29444, 29742)|2.2942062739|(0.872,0.661,0.946)|1
TTGEIVMTQSPATLALSPGERATLSCRASQSVSSRLAWYQQKPGQAPRLLIYDASSRATG
IPDRFSGSGSGTDFTLTISSLEPEDVAVYFCQQESNW
>V52RF-AQIB01144276.1-igkv |(40183, 40483)|2.96138667423|(1.000,1.000,0.966)|1
ARCDIQMTQSPSSLSASVGDRVTITCQASQGISNYLAWYQQKPGKAPKLLIYYASTLQSG
VPSRFSGSGSGTEFTLTISSLQPEDFATYYCQQHNSNP
>V53RF-AQIB01144276.1-igkv |(56521, 56821)|2.96461205453|(0.990,0.994,0.981)|1
ARCDIQMTQSPSSLSASVGDRVTITCQASQGISNYLAWYQQKPGKAPKPLIYKASTLESG
VPSRFSGSGSGTEFTLTISSLQPEDFATYYCQQRNSYP
>V54RF-AQIB01144282.1-igkv |(3113, 3400)|2.58396508784|(0.951,0.787,0.948)|1
TVVTQSPATLSLSPGERATVSCRTSQSVSNRLAWYQQKPGQAPRLLIYGASNRATGIPAR
FSGSGSGTDFTLTISSLELEDAAVYYCQQDNDWK
>V55RF-AQIB01144282.1-igkv |(46328, 46640)|2.69156133106|(0.884,0.963,0.870)|1
CNGDIVLTQSPASLAVSPGQKATITCRASESVSLFGINFIHWYQQKPGQPPKLLIYQASN
KDTGVPARFSGSGSGTDFTLTINPVEADDAANYYCLQSKTSP
>V56RF-AQIB01144282.1-igkv |(64268, 64559)|2.73003226731|(0.943,0.846,0.985)|1
IVLTQSPTSMAVSQGERVTISCTASSSISTSYLHWYQQKPGFPPRLLVYTTSSLASGVPA
RFSGSGSGTSYTLTISSMEAEDAANYYCQQGSSIP
>V57RF-AQIB01146109.1-iglv |(4711, 5018)|2.09955471374|(0.807,0.595,0.888)|1
PVVQAGLTQPPSVSKGLRQTATLTCTGNSNNVGNEGAAWLQQHQGHPPKLLSYRNNNRPS
GISERFSASRSGNTASLTITGLQPEDEADYYCSAWDSSLS
>V58RF-AQIB01146109.1-iglv |(79026, 79315)|2.02976651184|(0.883,0.763,0.644)|1
SLSQPVLTQSPSASASLGASVKLTCTLSSGHSSYNIAWHQQQQGKAPRYLMRLNSDGSHS
KGDGIPDRFSGSSSGADRYLTISNLQSEDEADYY
>V59RF-AQIB01146122.1-iglv |(12217, 12527)|2.71894585554|(0.919,0.852,0.981)|1
SWAEVVFTQPHSVSGSPGQTVTISCTRSSGSIDSSFVYWYQQRPGSAPTTVIYNDNRRPS
GVPDRFSGSIDSSSNSASLTISGLKSEDEADYYCQSDDSSG
>V60RF-AQIB01146122.1-iglv |(59374, 59666)|2.12161433807|(0.822,0.599,0.915)|1
SPGASASLTCTFSGGINVGDYTIHWYQQKPGSPPRYLLRYKSDSDKHQGSGVPSRFSGSK
DASANTGILRISGLQSEDEADYYCVIGRSSASHSD
>V61RF-AQIB01146122.1-iglv |(69507, 69814)|2.88221336006|(0.986,0.923,0.989)|1
SWAQSVLTQPPSVSGAPGQRVTISCTGSSSNIGGYNVHWYQQLPGTTPKLLIYGNNQRPS
GVSDRFSGSKSGTSASLTITGLQSEDEADYYCQSYDSSLS
>V62RF-AQIB01146122.1-iglv |(85423, 85729)|1.82833825264|(0.583,0.852,0.687)|1
SLSQPVLTQPPSASASLGASVTLTCTLSSGYSNYAVDWHQQRPGKGPQFVMRVGTGGIVG
SKGDGIPDRFSGSGSGLNRYLTIKNIQEEDESDYHCGADH
>V63RF-AQIB01146122.1-iglv |(92188, 92498)|2.42024233769|(0.952,0.730,0.921)|1
SLSQPVLTQPTSLSASPGASARLTCTLRSGISVGSYRVLWYQQKPGNPPRYLLNYHTDSD
KDQGSGVPSRFSGSKDASANAGILLISGLQSEDEADYYCAI
>V64RF-AQIB01146122.1-iglv |(97013, 97322)|2.90021336006|(0.992,0.929,0.995)|1
CWAQSVLTQPPSASGAPGQSVTISCSGSSSNIGSNSVYWYQQFPGTAPKLLIYYSNQRPS
GVPDRFSGSKSGTSASLTISGLQSEDEADYYCAAWDDSLSG
>V65RF-AQIB01146122.1-iglv |(110604, 110914)|2.55599478981|(0.976,0.901,0.808)|1
SLSQPVLTQPASLSASPGASASLTCTFSGGINVAGYYIYWYQQKPGSPPRYLLRYKSDSE
KHQGSGVPSRFSGSKDASANTGILRISGLQSEDEADYYCAI
>V66RF-AQIB01146122.1-iglv |(120767, 121056)|1.89421985545|(0.807,0.868,0.518)|1
SNSQAVVTQEPSLTVSPGGTVTLTCASSTGAVTSGHYFHWFQQKPGQAARTLIYNTNYKH
SWTPARFSGSLLGGKAALTLSGVQPEDEAEYYCW
>V67RF-AQIB01146122.1-iglv |(126866, 127176)|2.57515853575|(0.962,0.805,0.912)|1
SLSQPVLTQPTSLSASPGASVRLTCTLRSGISVGGYNIHWYQQKPGSPPRYLLYYYSDSN
KGQGSGVPSRFSASKDASANAGILLISGFQSEDEADYYCTT
>V68RF-AQIB01146122.1-iglv |(131665, 131974)|2.8767169434|(0.984,0.929,0.976)|1
SWAQSVLTQPPSASGAPGQSVTISCSGSSSNIGSNYVSWYQQLSGKAPKLLIYKNSQRPS
GVPDRFSGSKSGTSASLTISGLRSEDEADYYCAAWDDSLNG
>V69RF-AQIB01146122.1-iglv |(142908, 143215)|2.16197674961|(0.836,0.859,0.628)|1
SNSQAVVTQEPSLTVSPGGTVTLTCASSTGAVTSGHSPHWCQQKPGQAPRTLIYNTNYKH
SWTPARFSGSLLGGKAALILSGAQPEDEAEYYCWLYYSGA
>V70RF-AQIB01146122.1-iglv |(149998, 150308)|2.70815186287|(0.955,0.882,0.903)|1
SLSQPVLTQPASLSASPGASARLSCTLSSGINVGSYSIYWYQQKPGSPPRYLLYYYSDSS
KGQGSGVPSRFSGSKDASANAGLLLISGLQSEDEADYYCAI
>V71RF-AQIB01146122.1-iglv |(159131, 159440)|2.90392430843|(0.976,0.963,0.966)|1
SWAQSVLTQPPSVSGAPGQRVTISCTGSSSNIGGYYVQWYQQLSGTAPKLLIYGNNQRPS
GVSDRFSGSKSGTSASLTITGLQSEDEADYYCETWDNSLNG
>V72RF-AQIB01146122.1-iglv |(164963, 165270)|2.65393301985|(0.846,0.920,0.962)|1
SWAQSVLTQPPSVSGAPGQRVTISCTGSSSNIGGYDVHWYQQLPGTTPKLLIYDNNKRPS
GVSDRFSGSKSGTSASLTITGLQTEDEADYFCQSYDSSLG
>V73RF-AQIB01146122.1-iglv |(187790, 188100)|2.68976851209|(0.976,0.901,0.875)|1
SLSQPVLTQPASLSASPGASASLTCTFSGGINVAGYYIYWYQQKPGSPPRYLLWYKSDSD
KHQGSGVPSRFSGSKDASANTGILRISGLQSEDEADYYCAI
>V74RF-AQIB01146123.1-iglv |(2181, 2490)|2.61890053876|(0.949,0.845,0.884)|1
SWAQSVLTQPRSASEATRKSITISCSGSSSNIGSNYVSWYQQLPGTAPKLLIYYNDWRAS
GVSDRFSGSKSGTSASLAISGLQTEDEADYYCAAWDDSLSG
>V75RF-AQIB01146133.1-iglv |(15765, 16070)|2.47860786971|(0.947,0.727,0.987)|1
SVASYELTQPPSVSVSPGQTAKITCSGDTLAKIYARWFQQKPGQAPVLVIYKDSERPSGI
PERFSGSSSGTTVTLTISGAQAEDEADYYCYSGDDNNLTV
>V76RF-AQIB01146133.1-iglv |(25439, 25742)|2.84780593785|(0.958,0.974,0.922)|1
SWAQSALTQSPSVSGSPGQSVTISCTGTSSDVGGYNYVSWYQQHPGKAPKLMIYEVSKRP
SGVSDRFSGSKSGNTASLTISGLQAEDEADYYCCSYTTS
>V77RF-AQIB01146133.1-iglv |(37913, 38216)|2.46825053802|(0.963,0.822,0.829)|1
SAASYDLTQPHSVSVSPGQTARITCGGDDIGSEAVHWYQQKPAQAPVLVIYDNSDRPSGI
PERFSGSNSGNTATLTISGVEAGDEADYYCQVWDISSDH
>V78RF-AQIB01146133.1-iglv |(45024, 45327)|2.22089344535|(0.939,0.818,0.710)|1
SVVSSELTQEPALSVALGHTVTMTCQGDSLSSYYASWYQQKPGQVPVLVIYGNTNRPSGI
SGRFSGSWSGNTASLTITGAQVEDEADYYCGSWDNSANH
>V79RF-AQIB01146135.1-iglv |(5642, 5953)|2.04664315798|(0.894,0.601,0.850)|1
SAASYELTQPPSVSVSPGQMARITCRGDSIGSKYVQWFQQKPAQAPVLVIYSDSKRPSGI
PERFSGSNSGNTATLTISGVQAGDEADYYCQVWDSSSKHATV
>V80RF-AQIB01146136.1-iglv |(1665, 1968)|2.87987291563|(0.984,0.929,0.979)|1
SWAQSAPTQPRSVSGSPGQSVTISCTGTSSDIGGYNYVSWYQQHPGTAPKLMIYGVSNRP
SGVSDRFSGSKSGNTASLTISGLQAEDEADYYCCSYTTS
>V81RF-AQIB01146137.1-iglv |(9886, 10183)|2.71563800193|(0.933,0.865,0.936)|1
SVASYELTQPPSVSVSPGQTARITCSGDVLKENYADWYQQKPGQAPVLLIYEDSKRPSGI
PERFSGSTSGDTTTLTISSTLSEDGADYYCFSGDENN
>V82RF-AQIB01146137.1-iglv |(18233, 18536)|2.47147112872|(0.986,0.784,0.889)|1
SAVSYELTQPRSVSVSPGQTARITCGGDSIGSKYVHWYQQKPAQAPVLVIYDNSNRPSGI
PERFSGSNSGNTATLTISGVQAGDEADYYCQVWDSSSKH
>V83RF-AQIB01146137.1-iglv |(25864, 26167)|2.69377120486|(0.943,0.847,0.940)|1
SVVSSELTQDPAVSVALGQTVRITCQGDSLRSSYASWYQQKPGQAPVLVVYGNNNRPSGI
PERFSGSSSGNTASLTITGAQVEDEADYYCNSWDSSGNH
>V84RF-AQIB01146138.1-iglv |(15714, 16017)|2.84245111307|(0.928,0.948,0.978)|1
SWAQAALTQPPSVSKSLGQSVTISCTGTSSDIAAYNDVSWYQQHPGTAPRLLIYSVSNRP
SGVSDCFSGSKSGNTASLTISGLQAEDEADYYCCSYRSG
>V85RF-AQIB01146138.1-iglv |(24129, 24432)|2.47147112872|(0.986,0.784,0.889)|1
SAVSYELTQPRSVSVSPGQTARITCGGDSIGSKYVHWYQQKPAQAPVLVIYDNSNRPSGI
PERFSGSNSGNTATLTISGVQAGDEADYYCQVWDSSSKH
>V86RF-AQIB01146140.1-iglv |(2757, 3067)|2.65425565049|(0.982,0.812,0.970)|1
SWAQAALTQPHSVSGSPGQSVTISCTGTSSDIGGYNRVSWYQQHPGKAPKLMIYEVSNRP
SGVSDRFSGSKSGNTASLTISGLQAEDEADYYCSSYASSSN
>V87RF-AQIB01146140.1-iglv |(26014, 26324)|2.88490330517|(0.993,0.954,0.951)|1
SWAQAALTQPPSVSGSPGQSVTISCTGTSSDVGGYNYVSWYQQHPGKAPKLMIYEVNKRP
SGVSDRFSGSKSGNTASLTISGLQAEDEADYYCSSYAGSNT
>V88RF-AQIB01146141.1-iglv |(2344, 2653)|2.85013070699|(0.943,0.935,0.977)|1
SVASYELTQPPSVSVSPGQTARITCSGDALPDNYAYWFQQKPGQSPVLIIYEDSKRPSGI
PERFSGSSSGTVATLTISGAQVEDEADYYCYSADSSGNQHS
>V89RF-AQIB01146141.1-iglv |(10119, 10425)|1.96548235808|(0.906,0.572,0.857)|1
SVASYELTQPLSVSVALGQMARITCGGNNIGRKNVQWYQQKPDQAPVLVIYQDSKRPSGI
PERFSGSNSGNTATLTIDRAQAGDEADYYCQVWDSSTAHS
>V90RF-AQIB01146141.1-iglv |(13491, 13794)|2.829975705|(0.950,0.924,0.959)|1
SWAQAAPTQSPSVSGSAGQSVTISCTGTSSDIGGYNRVSWYQQHPGKAPKLMIYEVSKRP
SGVSDRFSGSKSGNTASLTISGLQAEDEADYYCSSYAGS
>V91RF-AQIB01146141.1-iglv |(50602, 50912)|2.54417249052|(0.833,0.833,0.892)|1
SWAQSAPIQSPSVSGSLGQSVTISCTGTSSDIGRYNYVSWYRQQPGTTTKLTMYNVNTRP
SGVSDRFSGSKSGNTASLTISGLQAEDEADYYCSSYETSDT
>V92RF-AQIB01146141.1-iglv |(69738, 70036)|1.68520571262|(0.743,0.589,0.564)|1
LCALPVLTQAPSASASLGASVKLTCTLSSEHSNYYIIWYQQRPGKSPRYIMKVNSDGTHS
KGDGIPDRFLGSSSGVDRYLTISNLQSDDEAEYYCGE
>V93RF-AQIB01153480.1-ighv |(7301, 7610)|2.82209801429|(0.970,0.905,0.964)|1
VLSQLQLQESGPGLVKPSETLSLTCAVSGGSISSYWWGWIRQAPGKGLEWIGNIYGSGGS
TEYNPSLKSRVTISKDTSKNQFSLKLSSVTAADTAVYYCAR
>V94RF-AQIB01153481.1-ighv |(29869, 30184)|2.95570083945|(0.992,0.974,0.991)|1
VQCEVQLVESGGGLIQPGGSLRLSCAASGFTFSDYAMSWVRQASGKGLEWVGYIRSKSNN
YATEYAASVKGRFTISRDDSKNTLYLQMSGLKTEDTAVYYCTI
>V95RF-AQIB01153482.1-ighv |(4668, 4983)|2.97528017622|(0.994,1.000,0.982)|1
VQCEVQLVESGGGLVQPGGSLRLSCAASGFTFSDHYMQWVRQAPGKGLEWVGFIRSKAYG
GTAEYAASVKGRFTISRDDSKSITSLQMNSLKTEDTAVYYCTR
>V96RF-AQIB01153482.1-ighv |(18678, 18987)|2.98793200206|(0.997,0.998,0.993)|1
VQCEVQLVESGGGLVQPGGSLKLSCAASGFTFGDYAMSWVRQAPGKGLEWVSSISNTGKT
TYYADSVKGRFTISRDNAKNSLSLQMNSLRAEDTAVYYCAR
>V97RF-AQIB01153482.1-ighv |(23774, 24083)|2.74246982548|(0.997,0.845,0.989)|1
VQGEVQLVESGGGLAKPGGSLRLSCAASGFTFSNYYMHWVRQAPGKGLEWVSSINTGGGS
TYYADSVKGRFTISRDNSKNTLSLQMDSLRAEDTAVYYCAK
>V98RF-AQIB01153484.1-ighv |(24203, 24512)|2.17768883957|(0.733,0.731,0.715)|1
AQSQVQLVQPGAEMRKPGDSVKVSCKASGYTFTNHDVDWVRQAPGQGPEWMGGINTNTGG
TSCAQTFQGRVTMTRDTTTSTAFMELSSLRSEDTAVYYCAR
>V99RF-AQIB01153484.1-ighv |(33458, 33767)|2.73396247|(0.943,0.994,0.845)|1
AHSQVQLVQSGAEIKQPGASVKLSCKASGYTFTSYYMHWVRQAPGQGLEWIGLISPYNGN
KGYAQNFQGRVTITTDTSTSTGYMELSSLRSEDTAVYYCTR
>V100RF-AQIB01153485.1-ighv |(161, 470)|2.7217891711|(0.920,0.849,0.995)|1
VQGEVQLVESGGGLAKPGGSLRLSCAASGFTFSDYHMHWVRQAPGKGLQWVSAINSGGGS
TWYADSVKGRFTISRENAKNTLYLQMDSLRAEDTAVYYCAK
>V101RF-AQIB01153486.1-ighv |(413, 728)|2.92740787807|(0.957,0.985,0.994)|1
VQCEVQLVESGGGLVQPGGSLRLSCAASGFTFSDYAMHWVRQAPGKGPEWVGFIRSKAYG
GTAEYAASVKGRFTISRDDSKNTAYLQMNSLKTEDTAVYYCTI
>V102RF-AQIB01153489.1-ighv |(27642, 27951)|2.63638625129|(0.937,0.924,0.825)|1
AHSEVQLVQSGAEVRKPGASVKVSCKVSGYTLTELSMHWVRQAPGKGLEWMGGVDPVYGE
TIHAEKFQGRVTMTEDTSTDTAYMELSSLRSEDTAVYYCAR
>V103RF-AQIB01153491.1-ighv |(2235, 2549)|2.3447022116|(0.926,0.794,0.777)|1
VLSQVTLKESGPALVKPTQTLTLTCTFSGFSLTTSGMGVGWIRQPPGKALEWLAHIYWDD
DKRYSPSLKSRLTISKDTSKNQVVLTMTNMDPVDTATYYCARR
>V104RF-AQIB01153491.1-ighv |(11513, 11822)|2.64667328813|(0.932,0.979,0.806)|1
VHSQVQLVQSGAEVKKPGASVKLSCKASGFTLGSYAISWVRQAPGQGLEWMGGIIPLVGI
TNYAQKFQGRVTITADTSTTTAYMELSSLRSEDTAVYYCAR
>V105RF-AQIB01153491.1-ighv |(20597, 20906)|2.34791983469|(0.835,0.978,0.692)|1
AHSQVQLVQSGAEVEKPGASVKVSCKATGYTFTNYFMQWVRQAPGQGLEWMGWVYLGNGN
TNYVQKFQGRVTMTRDVSTNTAYMELGSLRSKDMAVYYCAR
>V106RF-AQIB01153492.1-ighv |(6792, 7104)|2.862833323|(0.992,0.994,0.906)|1
VLSQVQLQESGPGLVKPSETLSLTCAVSGGSISSSYWSWIRQSPGKGLEWIGDIYGSSGG
STSYNPSLKSRVTMSVDTSKNQFSLKLSSVTAADTAVYYCAR
>V107RF-AQIB01153498.1-ighv |(778, 1087)|2.808993799|(0.989,0.973,0.888)|1
AHSQVQLVQSGAEVKKPGSSVKVSCKASGYTFTDYYMQWVRQAPGQGLEWMGRINPKTGG
TDYAQKFQGRVTMTRDTSTSTAYMELSSLRSEDTAVYYCAR
>V108RF-AQIB01153501.1-ighv |(4567, 4876)|2.93735831305|(0.998,0.965,0.980)|1
VQCEVQLVESGGGLVQPGASLRLSCAASGFTFGDYAMSWVRQAPGKGLEWVSYISSASST
IYYADSVKGRFTISRDNAKNSLYLQMNSLKTEDTAVYYCTR
>V109RF-AQIB01153501.1-ighv |(18760, 19071)|2.77991671673|(0.915,0.913,0.960)|1
VQCEVQLVESGGGVVQPEGSLRLSCAASRFTFDDYAMSWVRQAPGKGLEWVSVISWTRRS
TYYADSVKGRFTISRDNTKNSLYLQMDRLRAEDTALYYCAKD
>V110RF-AQIB01153501.1-ighv |(33820, 34141)|1.56294548846|(0.542,0.524,0.504)|1
KGAFLHSRDLPTGAHAQVQLVQSGAEVKQPGSSVKVSCKASGYTFTISVMQWVQQAPGQD
LQWIGRIYPYNGNTKYAQNFQGRVTMTTDTSTSTAYMELSSLRSE
>V111RF-AQIB01153504.1-ighv |(6983, 7290)|2.45956774626|(0.780,0.906,0.861)|1
AHSQVQLVLSRAEVEKPGASVKVSCKASGYTFTSYFMQWVGQAPGQGREWMGWVYLGNGN
TNYEQKFQGRVTITRDVSTSTTYMELSTLRSEDMAVYYCA
>V112RF-AQIB01153506.1-ighv |(6406, 6713)|2.45956774626|(0.780,0.906,0.861)|1
AHSQVQLVLSRAEVEKPGASVKVSCKASGYTFTSYFMQWVGQAPGQGREWMGWVYLGNGN
TNYEQKFQGRVTITRDVSTSTTYMELSTLRSEDMAVYYCA
>V113RF-AQIB01153507.1-ighv |(14778, 15088)|2.60753013681|(0.955,0.979,0.785)|1
ALSQVQLQESGPGVVKPSETLSLTCAVSGYSISSGYYWGWIRQPPGKGLEWIGSIYGSGG
SNYLNPSLKSRVTLSVDTSKNQFSLKLSSVTATDTAVYYCA
>V114RF-AQIB01153507.1-ighv |(24714, 25023)|2.99071202074|(0.993,0.999,0.999)|1
VQCEVQLVESGGGLVQPGGSLRLSCAASGFTFSSYWMHWVRQAPGKGLEWVSLINSDGGS
TRYADSVKGRFTISSENAKNSLYLQMNSLRAEDTAVYYCAR
>V115RF-AQIB01153507.1-ighv |(32453, 32768)|2.899828921|(0.991,0.936,0.985)|1
VQCEVQLVQSGGGLVQPGGSLRLSCAASGFTFSEYAMAWVRQASGKGLEWVGRIRSKSNN
YGTAYAASVKGSFTISRDDSKNTLYLQMSSLKTEDTAVYYCTR
>V116RF-AQIB01153507.1-ighv |(42168, 42483)|2.804400783|(0.972,0.999,0.874)|1
VQCEVQLVESGGGLVQPGGSLKLSCAASGFTFSNYYMDWVRQAPGKGLEWVGRIRNKANS
HTTEYAASVKDRFTISRDDSKNTLYLQMSGLKTEDKAVYYCAR
>V117RF-AQIB01153509.1-ighv |(6082, 6394)|2.95223355494|(0.992,0.971,0.991)|1
VQCEVQLVESGAGLVQPGGSLRLSCAASGFTFSDYYMDWVRQAPGKGLEWVSRISSGSGS
STYYPDSVKGRFTISRDNSKNTLYLQMNSLRAEDTAVYYCAR
>V118RF-AQIB01153509.1-ighv |(13578, 13893)|2.78936134483|(0.946,0.883,0.981)|1
VQCEVQLVESGGGLVQPGGSLRLSCAASGFTFSNHYMHWVRQAPGKGQEWVGFIRNKANG
GTAEYAASVKGRFTISRDDSKSITSLQMNSLKTEDTAVYYCTR
>V119RF-AQIB01153509.1-ighv |(29997, 30306)|2.96287652911|(0.995,0.990,0.979)|1
VQCEVQLVESGGGLVQPGGSLRLSCAASGFTFGDYDMSWVRQAPGKGLEWVSFISYTGKT
TYYADSVKGRFTISRDNAKNSLSLQMNSLRAEDTAVYYCTR
>V120RF-AQIB01153509.1-ighv |(39117, 39410)|1.66661655772|(0.562,0.909,0.579)|1
VQCEVQLVESGGGLVQPGGSLRLSCGASGFTFSDHYMDWVRQAPGKGLEWVSSISTGSGS
TTLYPDSVKGRFTISRDNAKNTLYLQMNSLRADVFS
>V121RF-AQIB01153509.1-ighv |(45356, 45665)|2.82140183629|(0.974,0.914,0.950)|1
AHSEVQLVQSGAEVKKPGASVNVSCKASGYTFTDYYLHWVRQAPGKGLEWMGRIDPENGE
SKYAQKFQDRLTMTADTSTDTAYMELSSLRSEDTAVYYCAT
>V122RF-AQIB01153511.1-ighv |(7980, 8295)|2.89444268494|(0.955,0.979,0.963)|1
VQCEVQLVESGRGLVQPGGSLRLSCAVSGFTFSDHYMSWVREAPGKGLEWVGFMRNKANG
GRTEYAASVKGRFTISRDDSKSIASLQMSSLKTEDTAVYYCAR
>V123RF-AQIB01153511.1-ighv |(11094, 11404)|2.96848011776|(0.985,0.996,0.988)|1
VQCEVQLVESGGGLVQPGGSLRLSCVASGFTFSDHYMDWVRQAPGKGLEWVSSISTGSGS
TTLYPDSVKGRFTISRDNAKNTLYLQMNSLRADDTAVYYCA
>V124RF-AQIB01153511.1-ighv |(40798, 41107)|2.97273242436|(0.983,0.997,0.994)|1
VQCEVQLVESGGGLAKPGGSLRLSCAASGFTFSSYGMHWVRQAPGKGLEWISAINSGGSN
TWYTDSVKGRFTISRDNSKNTLSLQMNSLRAEDTAVYYCAK
>V125RF-AQIB01153514.1-ighv |(1201, 1515)|2.22538289322|(0.884,0.771,0.721)|1
VLSQVTLKESGPVLVKPTQTLTLTCTFSGFSLSTSGVGVSWTRQPPGKALEWLALIYWHD
DKNYSPSLKSRLTISKDTSNNQVVLTMTNMDPVDTATYYCARR
>V126RF-AQIB01153517.1-ighv |(601, 913)|2.84463929724|(0.988,0.922,0.956)|1
VLSQVQLQQWGGGLVKPSETLSLTCAVYGGSISGYYYWSWIRQPPGKGLEWIGNIDGNSG
STNYNPSLKSRVTISKDTSKNQFSLKLSSVTAADTAVYYCAR
>V127RF-AQIB01153522.1-ighv |(387, 699)|2.78257483133|(0.910,0.912,0.980)|1
VLSQVQLQESGPGLLKPSETLSLTCAVSGGSISGGYGWGWIRQPPGKGLEWIGSIYTSSG
NTYYNPSLKSRVTISTDTSNNQFSLKLNSVTAADTAVYYCAR
>V128RF-AQIB01153537.1-ighv |(1707, 2018)|2.86567621346|(0.990,0.996,0.907)|1
VQCEVQLVESGGGVVQPGGSLRLSCAASGFTFDDYGMHWVRQAPGKGLEWVSDISWDGDS
TYYADSVKGRFTISRDDAKNSLYLQMDSLRAEDTALYYCAKD
>V129RF-AQIB01153538.1-ighv |(4311, 4620)|2.92965347361|(0.989,0.989,0.956)|1
AQSQVQLVQSGAEVKKPGASVKLSCKASGYTFTSYNINWVRQAPGQVLEWMGWINPSNGN
TGYAQKFQGRVTMTRDTSTSTAYMELSSLISEDTAVYYCAR
>V130RF-AQIB01153538.1-ighv |(21429, 21738)|2.64578641509|(0.938,0.944,0.819)|1
AHSQVQLVQSGVEVKKPGASVKVSCKASGYTFSIYAISWVRQAPGQGLEWMGAIIPLVGI
TNYAQKFQGRVTITADTSTSTAYMELSSLRSEDTAVYYCAR
>V131RF-AQIB01153538.1-ighv |(31031, 31340)|2.4369582217|(0.948,0.795,0.834)|1
AHSQVQLVQSGAEGKKPGSSVKVSCKASGYTFTNSAVQWVRQSPEQGLEWIGVIIIGNDN
TGYAQKFQGRVTITMDVSMSTAYVELSSLRSEDMAVYYCAA
>V132RF-AQIB01153541.1-ighv |(19819, 20128)|2.57015770234|(0.872,0.793,0.961)|1
AHSQEQLVQSGAEVKKPGASVKVSCKASGYIFTGYIISWLRQAPGQGFEWMGGINPSDGS
TSYAQKFQGRVTMTRDTSTSTVYVELSSLRSEDTAVYYCAA
>V133RF-AQIB01153541.1-ighv |(23910, 24219)|2.8318984707|(0.932,0.935,0.971)|1
AHSEMQLVQSEAEVKKPGASVKVSCKVSGYTFTYPYLHWVRQTPGQGLEWMGWITPYNGN
TNYAQKFQDRVTITRDRSMSTAYMELSSLRSEDTAVYYCAR
>V134RF-AQIB01153543.1-ighv |(7057, 7368)|2.90876413585|(0.996,0.987,0.939)|1
VQCEVQLVESGGGVVQPGGSLRLSCAASGFTFDDYAMGWVRQAPGKGLEWVSGISWNSGS
TGYADSVKGRFTISRDNAKNSLYLQMNRLRAEDTALYYCAKD
>V135RF-AQIB01153550.1-ighv |(2975, 3287)|2.7474673557|(0.877,0.952,0.994)|1
VLSQVQLQESGPGLVKPSETLSLTCAVSGYSISSAYDWSWIRQPPGKGLELIGYIYGNSA
STSYNPSLKSRVTISKDTSKNQFSLKLSSVTAADTAVYYCAR
>V136RF-AQIB01153553.1-ighv |(7961, 8270)|2.87213816983|(0.987,0.913,0.994)|1
VQGEVQLVESGGGLAKPGGSLRLSCSASGFTFSDYYMHWVRQASGKGLEWVSRINTGGGS
TWYADSVKGRFTISRENAKNTLYLQMDSLRAEDTAVYYCAR
>V137RF-AQIB01153553.1-ighv |(15671, 15986)|2.80716959072|(0.952,0.941,0.919)|1
VKCEAQLMESGGGLVQPGGSLRLSCAASGFTFSDHYMQWVRQAPGKGLEWVGLIRNKVDG
ETTDYAASVKGRVTISRDESKSITYLQMNNLKTEDTAVYYCAR
>V138RF-AQIB01153553.1-ighv |(22330, 22639)|2.79650304035|(0.995,0.866,1.000)|1
VQGEVQLVESGGGLVQPGGSLRLSCAASGFTFSSYAMHWARQAPGKGLEWVSYISSGGGN
TYYADSVKGRFTISRDNSKNTLSLQMNSLRAEDTAVYYCAR
>V139RF-AQIB01153555.1-ighv |(4669, 4978)|2.58607939203|(0.973,0.967,0.782)|1
VCAEVQLVQSGAEVKRPGESLRISCKTSGYSFTSSWISWVRQMPGKGLEWMGRIYPGDSD
TEYSPSFQGQVTISADKSISTTYLQWSSLKASDTATYYCAK
>V140RF-AQIB01153555.1-ighv |(23903, 24218)|2.89135311852|(0.935,0.995,0.986)|1
VQCEVQLVESGGGLVQPGGSLRLSCAASGFTFSDHYMDWVRQAPGKGLKWVGRIRNKANS
YTTEYAASVKGRFTISRDDSKNTLYLQMSSLKTEDTAVYYCTR
>V141RF-AQIB01153555.1-ighv |(39959, 40271)|2.64877511969|(0.988,0.969,0.811)|1
VQCEVQLVESGGGLVQPEGSLRLSCVASGFTFSNYDMAWVRQAPGKGLEWVSRISSPSGS
STYYPDSVKGRFTISRENAKNTLYLQMNSLRAEDTAVYYCAR
>V142RF-AQIB01153556.1-ighv |(2509, 2815)|2.38206417057|(0.812,0.724,0.940)|1
VQCEVQLVEYGGGLVQPGGSLRHSCGFTFSDHYMSWVHPAPGKGLEWVGFMRNKANGGRT
EYAASVKGRFTISRDDSKSIASLQMSSLNTEDTVLYYCAR
>V143RF-AQIB01153557.1-ighv |(2988, 3297)|2.98783600705|(0.993,0.997,0.998)|1
VQCEVQLVESGGGLVQPGGSLRLSCAASGFTFSDYWMYWVRQAPGKGLEWVSRISGSSSS
TYYPDSVKGRFTISRDNAKNTLYLQMDSLRAEDTAVYYCAR
>V144RF-AQIB01153557.1-ighv |(15135, 15441)|2.86024535942|(0.980,0.917,0.979)|1
VQCEVQLVESGGGLVQPGGTLRLSCAASGFTFGNSDLIWIRQAPGKGLEWVSYISSGGST
YYSDSVKGRFTISRENAKNTLYLQMSSLRVEDTAVYYCVR
>V145RF-AQIB01153558.1-ighv |(4802, 5117)|2.91847399961|(0.997,0.985,0.947)|1
VQCEVQLVESGGGLVQPGGSLRLSCAASGFTFSNSWMSWVRQAPGKGLEWVARIKSKADG
GTAEYAASVKGRFTISRDDSKNTLYLQMNSLKTEDTAVYYCTI
>V146RF-AQIB01153561.1-ighv |(995, 1304)|2.58183589925|(0.948,0.919,0.801)|1
VQCEVQPVESGGGLVQPGGSLRLSCTASGFTFSSTRMNWIRQSPGKRLEWVADIKYDGSE
KYYVDSVKGRFTISRDNAKNSLYLQMNSLRAEDTAVYYCVR
>V147RF-AQIB01153564.1-ighv |(5745, 6054)|2.57444593955|(0.967,0.952,0.783)|1
VSAEVQLVQSGAEVKRPGESLKISCKTSGYSFTSYWISWVRQIPGKGLEWIGTIYPSDSD
TRYSPSFQGQVTISADKSISTAYLQWSSLKASDTATYYCAK
>V148RF-AQIB01153565.1-ighv |(7319, 7625)|2.72071211851|(0.964,0.963,0.847)|1
CAEVQLVQSGAEVKKPGESLKISCKTSGYSFTSYWISWVRQIPGKGLEWIGAIDPSDSDT
RYSPSFQGQVTISADKSISTAYLQWSSLKSSDTATYYCAK
>V149RF-AQIB01153566.1-ighv |(30566, 30881)|2.94473782422|(0.965,0.993,0.993)|1
VQCEVQLVESGGGLVQPGGTLRLSCAASGFTFSNYWMDWVRQAPGKGLEWVGFIKNKADG
GTAEYAASVKGRFTISRDDSKNTLYLQMNSLKTEDTAVYYCTR
>V150RF-AQIB01156901.1-igkv |(3348, 3648)|2.96194800078|(0.989,0.987,0.986)|1
AKCDIQMTQSPSSLSASVGDKVTITCQASQSISSWLAWYQQKPGKAPKLLIYKASSLESG
VPSRFSGSGSGTDFTLTISSLQPEDFATYYCQQHNSAP
>V151RF-AQIB01158310.1-igkv |(1186, 1501)|2.59833492122|(0.975,0.818,0.914)|1
TSGDIVMTQTPLSLPVTPGEPASISCRSSQSLLHSNGYTYLNWYLQKPGQSPLLLIYLVS
NRASGVPDRFSGSGSGTDFTLKISRVEAEDVGVYYCMQDIKLP
>V152RF-AQIB01162308.1-trbv |(21260, 21551)|2.36534518434|(0.850,0.849,0.726)|1
PEVTQTPSHQVTQMGQEVILRCVPIPNHLYFYWYRQILGQKVEFLVIFFDNNISEKSEIF
DDRFSVGRPDGSDFTLKIKSTKLEDSAMYFCASSE
>V153RF-AQIB01162311.1-trbv |(7799, 8097)|2.14319291365|(0.909,0.874,0.631)|1
TQTPSHQVTQMGQEVILRCVPIPNHLNFYWYRQILGQKVEFLVYFYNDKILEKSEIFDDR
FSVERPDGSNFTLKIKSTKLEDSATYFCASSEATALQ
>V154RF-AQIB01162311.1-trbv |(11768, 12065)|2.61352346245|(0.896,0.852,0.875)|1
SLDTAVSQTPKYLVTQMGKKVSLKCEQNLGHDTMYWYKQDSKKLLKIMFSYNNKELTINE
TVSTRFSPESPDKAHLILHIKSLELGDSAVYFCASSQ
>V155RF-AQIB01162312.1-trbv |(4219, 4516)|2.40925263291|(0.913,0.807,0.791)|1
PTDTGVTQTPKHLVMGMTNKKSLKCEQHLGHNAMYWYKQKAKKPPELMFVYQYEKLSINE
SVPSRFSPECSKSSLLYLHLQALQPEDSALYLCASSQ
>V156RF-AQIB01162312.1-trbv |(12163, 12454)|2.36590076188|(0.852,0.795,0.763)|1
PEVTQTPSHQVTQMGQEVILWCVPISNHFYFYWYRQILGQKVEFLVYFYNGEISEKSEIF
DDRFSVGRSDGVHFTLKIKSTKLEDSATYFCASSE
>V157RF-AQIB01162312.1-trbv |(18644, 18941)|2.15257647128|(0.886,0.808,0.663)|1
PLDTAVFQTPKYLVTQMGKKVSLKCEQNLGHDTMYWYKQDSKKLLKIMFIYSNEEPILNE
TVPNRFSPESLGKAHLNLHIKPVELGDSAVYFCASSQ
>V158RF-AQIB01162312.1-trbv |(22989, 23286)|2.43534019656|(0.916,0.807,0.806)|1
PTDTGVTQTPKHLVMGMTNKKSLKCEQHLGHNAMYWYKQKAKKPPELMFVYNYEKLSINE
SVPSRFSPECSKSSLLYLHLRALQPEDSALYLCASSQ
>V159RF-AQIB01162312.1-trbv |(33925, 34221)|2.42261710191|(0.879,0.741,0.876)|1
PVEAGVTQTPRSLIKMRGQQVTLSCSPISGHRSVSWYQQTPGQGLQLLFEYFSETQRQKG
NFPNRFSGRQFSNSHSEMNVSTLELGDSALYLCASSL
>V160RF-AQIB01162312.1-trbv |(41443, 41740)|2.79513070699|(0.942,0.908,0.950)|1
PANADVTQSPKFQILKTGQNMTLKCAQDMNHNSMYWYRQDPGMGLRLIHYSATEDTTDTG
EVPDGYSVSRLNKKEFLLRLESAAPSQTSVYFCASSE
>V161RF-AQIB01162312.1-trbv |(55583, 55896)|2.67052655653|(0.922,0.878,0.884)|1
SLDTAVSQTPKYLVTQTGKNESLKCEQNLGHNAMYWYKQDSKKLLKIMFIYSNKEPVLNE
TVPNRFSPKSPDKAHLNLYITSVELGDSAVYFCASSQDTALQ
>V162RF-AQIB01162312.1-trbv |(59013, 59310)|2.54321239029|(0.833,0.868,0.848)|1
PMETGVTQTPRHLVMGMTNKKSLKCEQHLGHNAMYWYKQKAKKPPELMFIYNFKERAENN
SVPSRFSPECPDSSLLYLHLRALQPEDSALYLCASSQ
>V163RF-AQIB01162312.1-trbv |(70730, 71027)|2.68739593635|(0.866,0.947,0.907)|1
PVNAGVTQTPKFQILKTGQNMTLKCAQDMNHDRMYWYRQDTGMGLRLIHYSVGEGNTEKG
EVPSGYNASRLNKKDFLLRLELAAPSQTSIYFCASSE
>V164RF-AQIB01162312.1-trbv |(74325, 74625)|2.32889804315|(0.873,0.806,0.738)|1
HTDAGVSQSPRNKVTEEGKDVVLRCDPISGHIALYWYRQSLGKGLEFLIFFQGNDAPDKS
GLPSGRFSAERLEGSVSTLKIQRTQQGDSAVYLCASSS
>V165RF-AQIB01162313.1-trbv |(10114, 10411)|2.64013724966|(0.913,0.855,0.888)|1
HTGAGVSQSPSNKVTEKGNVALRCDPISGHAVLYWYRQNLGQGLEFLIYFQGTSAVDDSG
LRSDRFSATRPEGSVSTLKIQRTEQGDSATYFCASSL
>V166RF-AQIB01162313.1-trbv |(15115, 15427)|2.32658028917|(0.856,0.779,0.755)|1
PVDTGVTQSPTHLIKTRGQQVTLRCSPISGHTSVSWYQQAPGQGPQFIFKYANELRTSEG
NFPHRFSGRQFRDYHSEMNVSALELGDSALYLCASSLAQPGR
>V167RF-AQIB01162313.1-trbv |(17798, 18094)|2.37606902922|(0.879,0.728,0.858)|1
SVDSGVTQTPKHLITAIGQQVTLRCSPRSGDLSVYWYQQSLGQGLQFLIQYYNGAERAKG
NILERFSAQQFPDLHSELNLSSLELGDSALYFCASSL
>V168RF-AQIB01162314.1-trbv |(7361, 7658)|1.96283549534|(0.895,0.537,0.940)|1
HRDAEITQSPRHKITETGRQVTLKCHQTWNHNNMFWYRQDLGHGLRLIHYSYGVPDTNKG
EVPDGYSVSRSNEEDFPLTLESAASSQTSVYFCASSE
>V169RF-AQIB01162314.1-trbv |(17013, 17304)|2.34353466876|(0.899,0.839,0.729)|1
AGVAQSPRYKITEKSQAVAFWCDPISGHATLYWYRQILGQGPELLVQFQNDGVVDDSQLP
KDRFSAERLKGVNSTLRIQPAELGDSAMYLCASSL
>V170RF-AQIB01162316.1-trbv |(5792, 6099)|2.16070839816|(0.901,0.624,0.900)|1
HRDAGITQSPRYKVTEIGRQVTLTCHQTWNHSNMFWYRQDLGHGLNLIYYSAGASITDKG
EVPDGYAVSRSKTEDFPLTLESATRSQTSVYFCASSESTV
>V171RF-AQIB01162317.1-trbv |(5967, 6289)|1.71502937184|(0.853,0.676,0.573)|1
GVAQSPRYKVIEKSQAVTFWCNPGHATFTGTGHATLYWYRQILGQGPELLVQFRNNDVVD
DSQLPKDRFSAERLKGVNSTLKIQPAKLGDSAVYLCASSLATAMQ
>V172RF-AQIB01162317.1-trbv |(23070, 23367)|2.80247384997|(0.972,0.961,0.894)|1
PVNAGVTQTPKFQVLKTGQSMTLQCAQDMNHDCMYWYRQDPGMGLRLIHYSFGKGSTDKG
EVPDGYNVTRSSTEDFTLRLESAAPSQTSVYFCASSY
>V173RF-AQIB01162317.1-trbv |(27290, 27591)|2.22736877387|(0.867,0.712,0.774)|1
AGVSQSPRYRVTKRGQDVALRCDPISGHDYLYWYQQAPGQGPAFLTYFQNDAQRDKSGLP
NDRFSAERPEGSLSTLKIQRTQQGDSAVYLCASSLATV
>V174RF-AQIB01162317.1-trbv |(35256, 35552)|2.46987611071|(0.908,0.819,0.811)|1
PVQAGVTQSPTHLIKTRGQQVTLRCSPISGHSSVYWYQQALGQGLQFILSYDEEEERDRG
TFPHRFSGHQFPNYSSELNVNASEVGDSALYLCASSL
>V175RF-AQIB01162317.1-trbv |(46598, 46898)|2.70294958692|(0.931,0.880,0.905)|1
HTGAGVSQSPSYKVTKRGQDVALRCDPISGHVALYWYRRTLGQGPELLTYFQNDAQPDKS
GLPSDRFSAERPEGSVSTLKIQRTQQGDSAVYLCASSL
>V176RF-AQIB01162318.1-trbv |(2955, 3251)|2.7801261813|(0.949,0.976,0.878)|1
NAGVTQTPKFQVLKTGQSMTVQCAQDMNHDYMFWYRQDPGMGLRLIHYSGAAGTTDKGEV
PSGYNVSRLNTEDFPLRLESAAPSQTSVYFCASSYST
>V177RF-AQIB01162318.1-trbv |(7605, 7915)|1.63176356608|(0.843,0.529,0.683)|1
HTGARVSQSPRYKVTKRGQDAALRRDPISGHATLYWYQQALGQGPELLTYFSYEAQQDKS
GLPSDCFSAERPEGSVSTLKIQRTQQGDSAVYLCASSLATA
>V178RF-AQIB01162319.1-trbv |(8580, 8876)|2.11910031781|(0.959,0.821,0.680)|1
PVDAGVTQSPTHLIKMRGQQVTLRCSPISGHNTVSWYQQALGQGPQFIFQYYEKEEREKG
NFPGRFSGHQFPNYSSELNVNASEMGDSALYLCASSL
>V179RF-AQIB01162319.1-trbv |(20234, 20534)|2.07953656183|(0.674,0.867,0.677)|1
HTGAGVSQSPRYKVTKRGQDVALRCDPISGHEALYWYQQAPGQGPELLTYFNYKAQPDKS
GLPNDRFSAERPEGSFSTLTIQRTEQRDSAVYLRASSL
>V180RF-AQIB01162319.1-trbv |(25283, 25579)|2.17126730456|(0.949,0.840,0.680)|1
PVDAGVTQSPTHLIKTRGQQVTLRCSPISGHTSVSWYQQALGQGPQLIFQYYEKEEREKG
NFPGRFSGHQFPNYSSELNVNASEMGDSALYLCASSL
>V181RF-AQIB01162319.1-trbv |(33229, 33529)|2.12496565889|(0.915,0.685,0.783)|1
HTGAGVSQSPRYRVTKRGQEVAFRCDPISGHEYLYWYQQAPGQGPEFLTYFQNDAQLDKS
GLPSGRFSAERPEGSVSTLKIQRTQQGDSAMYLCASSL
>V182RF-AQIB01162319.1-trbv |(42071, 42367)|2.00947550431|(0.865,0.712,0.667)|1
PVEPGVTQSPTHLIKTRGQQVILRCSPISGHSSVSWYQQSLGQGPQFIFEHYEKEERGRG
NFPGRFSGRQFPNYSSELNVSALLLGDSALYLCASSL
>V183RF-AQIB01162319.1-trbv |(49518, 49833)|2.34907945273|(0.844,0.707,0.874)|1
LFLSAGPGNADVTQTPKFQLLKTGQSLTLQCAQDMNYNYMFWYRQDPGVGLRRIHYSVAA
GITDKGEVPNGYNVSRLNREDFPLRLESAALSQTSVYFCASSD
>V184RF-AQIB01162320.1-trbv |(3376, 3672)|2.52515752904|(0.947,0.870,0.807)|1
PVDTGVTQSPTHLIKMRGQQVTLRCSPISGHSSVYWYQQALGQGPQFIFQYYEKEERGRG
NFPDRFSGHQFPNYSSELNVSALLLGDSALYLCASSL
>V185RF-AQIB01162320.1-trbv |(10674, 10965)|2.56724444916|(0.914,0.965,0.774)|1
NAGVTQTPKFQVLKTGQSMIVQCAQNMNHDYMFWYRQDPGMGLRLIYYSVTAGITTKGEV
PNGYNVSRRNTEDFLLRLESAALSQTSVYFCASSY
>V186RF-AQIB01162320.1-trbv |(14920, 15220)|2.74519283136|(0.915,0.931,0.901)|1
HTGAGVSQSPRYKVIKKGQDVALRCDPISGHAALYWYQQALGQGPEFLTYFNYKDQPDKS
GLPNNRFSAERPEGSFSTLTIQRTEQQDSAVYLCASSL
>V187RF-AQIB01162320.1-trbv |(23602, 23892)|2.34762213103|(0.918,0.714,0.876)|1
DAGVTQSPMHLIKTRGQQVTLRCFPISGHNTVSWYQQTLGQGPQLIFQYYREEERGKGNF
PDRFSGRQFPNYSSELNVSALLLGDSALYLCASSL
>V188RF-AQIB01162320.1-trbv |(39063, 39360)|2.06353318354|(0.888,0.580,0.914)|1
SVAAGVTQSPRHLIKEKRETATLQCYPIPEHDTVYWYQQGPGQGPQFLISFYEKMQRDKG
SIPDRFSAQQFSDYHSELNMSSLELGDSAVYLCASSL
>V189RF-AQIB01162320.1-trbv |(46876, 47183)|2.6603881665|(0.884,0.896,0.881)|1
HMDARITQSPRHKITETGTPVTLRCHQTENHRYMYWYRQDLGHGLRLIHYSYGVEDTDKV
EVSDGYSVSRSKTEDFLLTLESATRSQTSVYLCASSEPTV
>V190RF-AQIB01162320.1-trbv |(57860, 58160)|2.16948121251|(0.932,0.671,0.839)|1
LTEAGVTQSPRYKITEKKQPVAFWCNPISGHNTLYWYRQNLGQGPELLVRYENEEAVDDS
QLPKDRFSAERLKGVDSTLRIQPAELGDSAVYLCASSL
>V191RF-AQIB01162320.1-trbv |(63466, 63766)|2.28205623562|(0.906,0.814,0.722)|1
HTDAGVIQSPRHEVTEMGKEVTLRCEPISGHNSLFWYRQTMMRGLEFLIYFNNKSPIDDS
GMPKDRFSAKMPNASFSTLKIQPSEPRDSAVYFCASSL
>V192RF-AQIB01162320.1-trbv |(66748, 67048)|2.40505197352|(0.860,0.815,0.770)|1
HTDAGVIQSPRHEVIEMGKEVTLRCEPISGHTYLFWYRQTMMRGLEFLIYFNNKSPIDDS
GMPKDRFSAEMPEASFSILKIQPSEPRDSAVYFCASSL
>V193RF-AQIB01162320.1-trbv |(82427, 82727)|2.22389477639|(0.864,0.945,0.633)|1
LIDAGVTQTPRHKVTEMGQEVTMRCQPILGHNTIFWYRQTMMRGLEFLIYFNNKSPIDDS
GMPKDRFSAEMPNASLATLKIQPSEPRDSAVYLCASGL
>V194RF-AQIB01162320.1-trbv |(89350, 89651)|2.47572552043|(0.900,0.845,0.790)|1
AGVTQFPSHRVIEKGQAVTLRCEPISGHDYLYWYRRVMGKELKFLIYFLRASMQDEFGMP
NKRFSAERTGGTYSTLKVQPAELEDSGVYFCASSQDTV
>V195RF-AQIB01162320.1-trbv |(94443, 94740)|1.81669595094|(0.853,0.706,0.587)|1
HGDVMVIQNPRYQVTQLGKPVTLSCSQNLNHRVMYWYQQKPSHAPKLLFHYYDKDFNNEA
DTPDNFQSRRPNTSFCFLDISSPGLEDAAVYLCASSK
>V196RF-AQIB01162320.1-trbv |(99411, 99711)|2.42284686856|(0.870,0.806,0.789)|1
SPGEEVTQTPKHLVKGEGQKAKLYCAPITGHSYVFWYQQVLRKEFKFLISFQNKNVFDET
GMPKERFSAKCPPNSPCSLEIQATKLKDSAVYFCASSQ
>V197RF-AQIB01162321.1-trbv |(2362, 2659)|2.66944634762|(0.909,0.951,0.837)|1
TVDGGITQSPKYLFRKEGQNVTLSCEQNLNHDAMYWYRQDPGQGLRLIYYSQTVNDIQKG
DTAEGYSVSRERKQSFPLTVTSAQRNPTAFYLCASSI
>V198RF-AQIB01162321.1-trbv |(20388, 20688)|2.45620152011|(0.911,0.739,0.918)|1
STDTKVTQRPRLLVKANEQKAKMDCVPVKGHSYVYWYRKKLDEELKFLIYFQNEEIIQKA
EIINERFSAQCPQNSPCTLEIQSTESGDAALYFCASSK
>V199RF-AQIB01162321.1-trbv |(29352, 29657)|2.48168786831|(0.878,0.807,0.827)|1
SFHAEVTQTPGYLVKGKGQKTKMDCTPEKGHTFVYWYQQNQNKEFTFLISFQNEQVLQET
ELHKKRFSSQCPKNPPCSLEIPSSEPGDTALYLCASSQST
>V200RF-AQIB01162321.1-trbv |(41537, 41835)|2.61495202911|(0.878,0.911,0.837)|1
SMDADVTQTPRNKIAKTGKRIMLECSQTKSHDRMYWYRQDPGLGLRLIYYSFDVKDINKG
EISDGYNVSRQEQAKFSLSLESATPNQTALYFCATSD
>V201RF-AQIB01162321.1-trbv |(50021, 50318)|2.64081063759|(0.879,0.914,0.855)|1
LMEADIYQNPRHCVIGTGKKITLECSQTMGHDKMYWYQQDPGMELHLIHYSYGVNSTERG
DFSSESTVSRIRIEHFPLTLESASPSHTSQYLCASSE
>V202RF-AQIB01162321.1-trbv |(81250, 81547)|2.53064870298|(0.809,0.925,0.859)|1
PLEAQVTQNPRYLITVTGKKLTVTCSQNMNHEYMSWYRQDPGLGLRQIYYSINVEMVDKG
DIPEGYIVSRKEKRNFLLILESPSPSQTSLYFCASSL
>V203RF-AQIB01162321.1-trbv |(86583, 86890)|2.54195665333|(0.832,0.867,0.849)|1
LVDVKVTQSSRYLIKRTGEKVFLECVQDMDHERMFWYRQDPGLGLRLIYFSYDVKLNEKG
DIPEGYNVSREKKERFSLILGFASTNQTSMYLCASSLSTA
>V204RF-AQIB01162321.1-trbv |(106451, 106754)|2.53724504898|(0.873,0.781,0.929)|1
SVFSAVVSQKPSRDVCQRGTSVTIQCQVDSQVTMMFWYRQQPGQSMTLIATANQGSEATY
ESGFVIDKFPISRPNLTFSTLTVSNTSPEDSSIYLCSVE
>V205RF-AQIB01086294.1-ighv |(20916, 21222)|2.3576795666|(0.746,0.929,0.852)|-1
VRCEVQRVESGGGLVQPGGSLRLSCAASGFTISSSWMNWDFQAPGKGLECVSHISSVGST
DYPDSIKGQFTISRDNTKNTLYVQMNSLRAEDMAVYYCAR
>V206RF-AQIB01128636.1-trav |(12150, 12438)|2.40203069896|(0.801,0.747,0.940)|-1
LSGELKVGQNPLFLSTQEGKNDTIYCNYSTASDRLYWYRQDPGKSLESLFVLLSNGAVKQ
EGRFMASLDTKARLSTLHITAALQDLSATYFCAV
>V207RF-AQIB01128637.1-trav |(19009, 19296)|1.92871034267|(0.656,0.578,0.766)|-1
VSSQELEQSPQSLIVQEGRNLTINCTSSKTLHGLHWYKQKYGEGLIFLMMLQKGGEEKSH
EKITAKLDEKRQQSFLHITACQPSHAGIYLCGGD
>V208RF-AQIB01128637.1-trav |(37303, 37593)|1.91571515868|(0.679,0.568,0.912)|-1
VSSEDKVVQNPLSLVVHDGDTVTLNCSYEVVNFRSLLWYKQEKKAPTFLFMLTSSGIEKK
SGRLSSILDKKELFSILNITATQTRDSAVYLCAVE
>V209RF-AQIB01128637.1-trav |(70372, 70673)|2.23979212684|(0.889,0.857,0.671)|-1
SGMAQTVTQSQPEMSVREAETVTLSCTYDTSESDYYLFWYQQPPSRQMTLIIRQEAYKQQ
NATENRFSVNFQKAAKSFSLKISDSQLGDAAMYFCAFM
>V210RF-AQIB01128637.1-trav |(79553, 79853)|2.36798884907|(0.866,0.840,0.733)|-1
SGMAQTVTQSQPEMSVREAETVTLSCTYDTSESYYYLFWYKQPPSRQMTLIIRQEAYKQQ
NATENRFSVNFQKAAKSFSLKISDSQLGDAARYFCAYR
>V211RF-AQIB01128641.1-trav |(18235, 18532)|1.91415902463|(0.775,0.547,0.780)|-1
VRGIQVEQSPPDLILQEGANSTLRCNFSATVSNLQWFHQNPWGQLINLFYIPSGTKQNGR
LIATTVTKERYSLLHISSSQTTDSGIYFCAVESQCSP
>V212RF-AQIB01128641.1-trav |(32761, 33073)|1.80494022835|(0.830,0.515,0.793)|-1
VSGQQKEKSDRQQVKQSPQSLIVQKGGISIINCAYENSAFDYFPWYRQFPGRGPALLIAI
RSAASEKEEGRFKIFFNKSAKNFSLHIMDSQPGDSATYFCAA
>V213RF-AQIB01128641.1-trav |(41129, 41429)|2.12525792391|(0.770,0.669,0.732)|-1
SSVAQKVTQAQSSVSMTVGKAVTLNCQYETSWWSYYLFWYKQLPSKEMIFLIRQGSSEQN
ARNGRYSVNFEKAASSIALTISALQLEDSATYFCALWE
>V214RF-AQIB01128641.1-trav |(57380, 57679)|2.21294144724|(0.836,0.665,0.823)|-1
VNGQQIMQIPQYQHVQEGEDFTTYCNFSTTLNNIQWYKQRPGGHPVFLMMLVKSGEVKKQ
KRLTFRSGEAKKNSSLHITASQTTDVGSYFCAGHSAPQ
>V215RF-AQIB01128641.1-trav |(68354, 68644)|2.14745382631|(0.773,0.634,0.826)|-1
TIIDAKTTQPTSMDCAEGRAANLPCNHSTISANEYIHWYRQIHSQGPQYVIHGLKNKETN
AMASLIITEDRKSSTLILPHATLRDTAVYYCIVRV
>V216RF-AQIB01128641.1-trav |(105112, 105436)|2.13831815075|(0.696,0.770,0.694)|-1
VNSQQKNDDQQVKQNPPSLSVQEGGISILNCDYTNSMFDYFLWYKKYPAEGPTFLISIRS
VKDKNEEGRFTVFLNKSAKHLSLHIGASQPGDSAVYLCAASAQCSP
>V217RF-AQIB01128642.1-trav |(7440, 7727)|2.35637660629|(0.909,0.842,0.736)|-1
LSGEDQVTQSPEALSLQEGESSSLNCSYTVSGLRGLFWYRQDPGKGPEFLFSLYSAGEEK
EKERLKATLTKKESFLHITGPKPEDSATYLCAVQ
>V218RF-AQIB01128642.1-trav |(19364, 19663)|2.20394713988|(0.789,0.643,0.921)|-1
VSGKQEVTQIPAALSVPEGDNLVLNCSFTDSAIYNLQWFRQDPGKGLTSLLLIQSSQREQ
TSGRLNASLDKSSGRSTLYITASQPTDSATYLCAVRHS
>V219RF-AQIB01128643.1-trav |(8686, 8977)|2.61477635195|(0.841,0.906,0.897)|-1
RTNGDSVTQTEGPVTLPERAALTLNCTYQTSYSAFIFWYVQYPKKEPELLLKSSENQETN
SRGFQASHVKSDSSFHLEKPSVQLSDSAVYYCVLR
>V220RF-AQIB01128643.1-trav |(11902, 12205)|2.36080640148|(0.820,0.801,0.757)|-1
SSMAQKVTQAQTEISVVEKEDVTLDCVYETRETTYYLFWYKQPPSGELVFLIRQNSFNEQ
NEINGRYSSNFQKSTSSFNLTITASQVMDSAVYFCALNE
>V221RF-AQIB01128644.1-trav |(31336, 31645)|1.72962766574|(0.792,0.647,0.562)|-1
TVMCLVLGTTGQNIDQPTEMTAMEGAIVQINCTYQTSGFNGLSWYQQHDGEAPILLSYNV
LDGLEQKDRFSSFLSNSKRYSYLLLKELQMKDSASYLCAVR
>V222RF-AQIB01128644.1-trav |(117046, 117341)|2.29950499542|(0.856,0.784,0.736)|-1
DQVTVAEGNPLTGKCTYSVSGNPYLFWYVQYPNQGLQFLLKYITGDNLVKGNYGFEAEFN
KSQTSFHLKKPSVLVSDSALYFCAVRDTLIGAAGGA
>V223RF-AQIB01128644.1-trav |(158071, 158361)|2.60790488653|(0.849,0.857,0.925)|-1
MSRGDDVEQSLFLSVREGDISVINCTYTDSSSTYLYWYKQEPGAGLQLLIYILSNTDLKQ
DQRLTVLLNKKDKHLSLRIADTQTGDSAIYFCAES
>V224RF-AQIB01128644.1-trav |(168024, 168312)|2.1240027783|(0.815,0.767,0.652)|-1
VKSQKIEQNSETLNIQEGKTATLTCNYTNYSPSYLQWYRQDPGRSPVFLLLIRENEKEKW
KERLKVTFDTTLKKSLFHITASQPADSATYLCAL
>V225RF-AQIB01128644.1-trav |(203408, 203702)|2.80520848353|(0.973,0.993,0.877)|-1
GINGDSVVQTEGQVLLSEGNSLIVNCSYESTQYPSLFWYVQYPGEGPQLLLKAMKDNDKE
SNKGFEATYRKETTSFHLEKDSVQESDSAVYFCALS
>V226RF-AQIB01128644.1-trav |(216592, 216885)|2.37520871374|(0.762,0.804,0.956)|-1
GSGKNQVEQSPQSLIILEGKNCTLQCNYTVSPFSNLRWYKQDTGKGLISLTIMTFSDNTK
SNGRYTATLDADTKQSSLYITAAQLSDSASYICVVS
>V227RF-AQIB01128644.1-trav |(232171, 232464)|2.7229167015|(0.900,0.891,0.938)|-1
VWGQQKEVEQNPGPLSVPEGATASLNCTYSNSAFQYFMWYRQYSRKGPQLLIYIYSSGNK
EDGRFTAQVDKSSKYISLFIRDSQPSDSATYFCAMS
>V228RF-AQIB01128644.1-trav |(237634, 237931)|1.71468961057|(0.926,0.696,0.611)|-1
GTRAQSVTQLDSQVSVSEGVPVLLRCNYSSSFPPNLFWYVQYPNQGLQLLLKYISGTALV
KGINGFKAEFKKSETSFHLTKASAHVSDAAEYFCAVS
>V229RF-AQIB01128644.1-trav |(243150, 243447)|2.39516822136|(0.917,0.851,0.750)|-1
TARAQSVTQPDIHITVSEGASLELRCNYSYGATPSLFWYVQSPGQGLQLLLKYFSGDTLV
QGIKGFEAEFKRSQYSFNLRKPSVHWSDAAEYFCAAG
>V230RF-AQIB01128644.1-trav |(257060, 257353)|2.47997474155|(0.934,0.895,0.765)|-1
VSRGESVGLHLPTVSVQEGDNSVINCTYSDSASDYFLWYKQESGKGPQSIIDIRSNMAKR
QGQRLTVLLNKTMKHLSLQIAATEPGDSAVYFCAEN
>V231RF-AQIB01128644.1-trav |(262905, 263206)|2.55527703663|(0.945,0.816,0.877)|-1
SGIAQKITQTQPAMFVQEKEAVTLDCTYDTSDQSYGLFWYKQPSSGEMIFLIRQESYDKQ
NATEGRYSLNFQKARKSVNLVISASQVEDSAMYFCAMR
>V232RF-AQIB01128644.1-trav |(280831, 281125)|2.67265267434|(0.929,0.881,0.881)|-1
RTRGDSVTQMEGPVTLSERAFLTINCTYTATGYPSLFWYVQYPGEGPQLLLKAVKTDEKG
SNKGFEATYRKETTSFHLKKDSVQESDSAVYFCALS
>V233RF-AQIB01128644.1-trav |(305369, 305662)|2.72495715951|(0.910,0.883,0.938)|-1
VWSQQKEVEQNPGPLSVPEGATASLNCTYSNSAFQYFMWYRQYSRKGPQLLIYIYSSGNK
EDGRFTAQVDKSSKYISLFIRDSQPSDSATYFCAMS
>V234RF-AQIB01128644.1-trav |(318352, 318649)|1.62603371356|(0.898,0.738,0.521)|-1
GTRAQSVTQLDSQVPVFEEAPVLLRCNYSSSVSVYLFWYVQYPNQGLQLLLKYLSGPTLV
KGINGFEAEFKKSETSFHLRKPSARISDTAEYFCAVS
>V235RF-AQIB01128644.1-trav |(330220, 330535)|1.9382431109|(0.777,0.534,0.948)|-1
GTRAQSVTQPEKLLSVFKGAPVELKCYYSYSGSPNLFWYVQYPRQRLQLLLRHISRESIK
GFTADLNKSDTSFHLKKLFAQEEDSATYYCALSGTVAGFARKQ
>V236RF-AQIB01128644.1-trav |(340098, 340385)|2.79360007999|(0.928,0.938,0.928)|-1
VNSQQGEEDPQTLSIQEGENATMNCSYKTSINNLQWYRQDSGRSLVQLTLIRSNERQKNS
GRLRVTLDTSKKSSSLLITASRAADTASYFCATD
>V237RF-AQIB01144282.1-igkv |(6898, 7198)|2.47017112551|(0.961,0.723,0.993)|-1
AKCDIQLTQSPTFLSASVGDRATIACRASQSINKGLAWYQQKPGKVPKLLISYASDLYTG
VPSRFSGSGSGTDFTLTISSLQPEDAATYYCFQYNSYP
>V238RF-AQIB01144282.1-igkv |(55648, 55948)|2.6925299527|(0.890,0.871,0.945)|-1
TTGQVILTQSPATLSLSPGERATLSCRASQSVSSYLAWYQQKPGQAPRLLIYSASSRATG
IPDRFSGSGSGTEFTLTISSLEPEDVGVYHCYQYYSGY
>V239RF-AQIB01144282.1-igkv |(64457, 64745)|2.04327006171|(0.660,0.847,0.667)|-1
TILTQSLAFVSATPGDKVTISCKASQDIDDDMNWYQQEPGEAPKLIIKDATTLVSGIPPR
FSGGRYGVDFTLTINNVESEDAAYYFCQQHDNFP
>V240RF-AQIB01144284.1-igkv |(30267, 30585)|2.5527444405|(0.973,0.758,0.992)|-1
AYGDIVMTQSPDSLAVSLGERVTINCKSSQSLLYSSNNKNYLAWYQQKPGQAPTLLISWA
STRESGVPNRFSGSGSGTDFTLTISGLQAEDVAVYYCQQHYSSP
>V241RF-AQIB01145361.1-ighv |(1895, 2208)|2.77429713907|(0.943,0.888,0.956)|-1
VQCEVQLVESGGGLVQPGRFLRLSCAASGFTFSNCYMHWAHQAQGRGLEWVSLMRKKANS
YATEYAVSVKDRFTISRDDSKNTLYLQMNSLKTEDTAVYYCA
>V242RF-AQIB01145362.1-ighv |(14904, 15217)|2.77429713907|(0.943,0.888,0.956)|-1
VQCEVQLVESGGGLVQPGRFLRLSCAASGFTFSNCYMHWAHQAQGRGLEWVSLMRKKANS
YATEYAVSVKDRFTISRDDSKNTLYLQMNSLKTEDTAVYYCA
>V243RF-AQIB01146043.1-iglv |(9768, 10077)|2.55181517647|(0.825,0.941,0.839)|-1
VDSETVVTQEPSLSVSSGGTVTITCGLSSGSVSTSNYPSWYQQTPGQAPRTLIYSTNTRP
SGVPDGFSGSILGNKAALTIMGAQADDESDYYCTLYMGSGI
>V244RF-AQIB01153518.1-ighv |(54, 366)|2.81874863486|(0.903,0.974,0.995)|-1
VLSQVQLQESGPGLLKPSETLSLTCAVSGGSISDSYRWSWIRQPPGKGLEWIGNIYGNSA
STNYNPSLKSRVTISKDTSKNQFSLKLSSVTAADTAVYYCAR
>V245RF-AQIB01158235.1-ighv |(4748, 5060)|2.97483600705|(0.992,0.987,0.996)|-1
VQCEVQLVESGGGLVQPGGSLRLSCVASGFTFSDHYMHWVRQALGKGLEWVSRISSGSGS
STYYADSVKGRFTISRDNAKNTLYLQMNSLRAEDTAVYYCAR
>V246RF-AQIB01159121.1-igkv |(3373, 3688)|2.38772272753|(0.919,0.797,0.792)|-1
SSGDVVMTQSPLSLPVTPGQPASISCRSSQSLVHSDGNTYLSWFQQKPGQPPRLLIYQVS
NRDSGVPDRFSGSGAGTDFTLKISRVEAEDVGVYYCVQGTKVP
>V0RF-AACZ03015560.1-igkv |(51593, 51911)|2.62345793396|(0.967,0.793,0.978)|1
AYGDIVMTQSPDSLAVSLGGRATINCKSSQSILYSSNNKNYLAWYQQKPGQPPKLLIYWA
STRQSGVPDRFSGSGSGTDFTLTISSLQAEDVAVYYCQQHYSAP
>V1RF-AACZ03015560.1-igkv |(63266, 63554)|2.52410694486|(0.852,0.792,0.906)|1
TTLTQSPAFVSATPGDKVTISCKASQDIDDDMNWYQQKPGEAAIFIIQEATTLVSGIPPR
FSGSGYGTDFTLTINNIESEDAAYYFCLQDDNFP
>V2RF-AACZ03050973.1-trgv |(700, 1013)|2.32976099242|(0.951,0.824,0.757)|1
SQKSSNLEGRMKSVTRPTGSSAEITCDLIVINAVYIHWYLHQEGKSPQRLLYYDVSNSRD
VLESGLSLGKYYTHTPRRWSWILRLQNLIENDSGVYYCATWD
>V3RF-AACZ03050974.1-trgv |(13419, 13732)|1.84446124329|(0.917,0.504,0.918)|1
SQKSSNLEGRMKSVTRPTGSSAVITCDLPVENAGYTHWYLHQEGKAPQRLLYYDSYNSRV
VLESGISQEKYHTYASTGKSLKFILENLIERDSGVYYCATWD
>V4RF-AACZ03053974.1-trbv |(14398, 14698)|2.61441477068|(0.937,0.913,0.820)|1
LTEPEVTQTPSHQVTQMGQEVILRCVPISNHLYFYWYRQILGQKVEFLVSFYNNKISEKS
EIFDDQFSVERPDGSNFTLKIRSTKLEDSAMYFCASSE
>V5RF-AACZ03053974.1-trbv |(26630, 26943)|2.06749952048|(0.851,0.942,0.573)|1
PIDTEVTQTPKHLVMGMTNKKSLKCEQHMGHRAMYWYKQKAKKPPELMFVYSYKKLSINE
SVPSRFSPECPNSSLLNLHLHALQPEDLALYLCASSQDTALQ
>V6RF-AACZ03053974.1-trbv |(34490, 34786)|2.44775110564|(0.924,0.742,0.907)|1
PVEAGVTQTPRYLIKARGQQVTLSCSPISGHRSVSWYQQTPGQGLQFLFEYFSETQRNKG
NFPGRFSGRQFSNSRSEMNVSTLELGDSALYLCASSL
>V7RF-AACZ03053974.1-trbv |(41734, 42031)|2.89824228261|(0.987,0.987,0.935)|1
PVNAGVTQTPKFQVLKTGQSMTLQCAQDMNHNSMYWYRQDPGMGLRLIYYSVGEGTTDKG
EVPDGYNVSRLNKREFSLRLESAAPSQTSVYFCASSE
>V8RF-AACZ03053974.1-trbv |(45589, 45894)|1.86910152183|(0.773,0.573,0.695)|1
HTGPGVSQSLRHKVAKKGKDVALRYDPISGHNALYWYRQSLGQGLEFPIYFQGKDAADKS
GLPRDRFSAERPEASISTLKFQRTQQGDLAVYLCASSSAA
>V9RF-AACZ03053975.1-trbv |(1894, 2207)|2.52770427131|(0.956,0.896,0.792)|1
PMEMGVTQTPRHLVMGMTNKKSLKCEQHLGHNAMYWYKQSAKKPLELMFVYNFKEQTENN
SVPSRFSPECPNSSHLFLHLHALQPEDSALYLCASSQDTALQ
>V10RF-AACZ03053976.1-trbv |(3094, 3391)|2.71595581133|(0.879,0.978,0.899)|1
PVNAGVTQSPKFRVLKTGQSMTLQCAQDMNHNYMYWYQQDPGMGLRLIHYSAGEGTTAKG
EVPDGYNVSRLNTQNFLLRLESAAPSQTSVYFCATSE
>V11RF-AACZ03053977.1-trbv |(2980, 3277)|2.6397050841|(0.916,0.945,0.819)|1
PLDTAVSQTPKYLVTQMGKKESLKCEQNLGHNAMYWYKQDSKKFLKTMFIYSNKEPILNE
TVPNRFSPDSPDKAHLNLHINSLELGDSAVYFCASSQ
>V12RF-AACZ03053977.1-trbv |(6432, 6729)|2.57580362899|(0.961,0.851,0.855)|1
PMEMGVTQTPRHLVMGMTNKKSLKCEQHLGHNAMYWYKQSAKKPLELMFVYSLEERVENN
SVPSRFSPECPNSSHLFLHLHTLQPEDSALYLCASSQ
>V13RF-AACZ03053977.1-trbv |(14911, 15208)|2.63231151929|(0.957,0.869,0.868)|1
PVNAGVTQTPKFRVLKTGQSMSLLCAQDMNHEYMYWYRQDPGMGLRLIHYSVGEGTTAEG
EVPDGYNVSRLKKQNFLLGLESAAPSQTSVYFCASSY
>V14RF-AACZ03053979.1-trbv |(398, 698)|2.78712485441|(0.961,0.964,0.885)|1
HTGAGVSQSPSNKVTEKGKDVELRCDPISGHTALYWYRQSLGQGLEFLIYFQGNSAPDKS
GLPSDRFSAERTGGSVSTLTIQRTQQEDSAVYLCASSL
>V15RF-AACZ03053981.1-trbv |(4476, 4773)|2.45966963849|(0.904,0.756,0.885)|1
PVIAGITQAPTSQILAAGRSMTLRCTQDMRHNAMYWYRQDLGLGLRLIHYSNTAGTTGKG
EVPDGYSVSRANTDDFPLTLASAVPSQTSVYFCASSD
>V16RF-AACZ03053981.1-trbv |(8075, 8375)|2.66629387475|(0.954,0.964,0.819)|1
HTGAGVSQTPSNKVTEKGKDVELRCDPISGHAALYWYRQSLGQGPEFLIYFQGTGAADDS
GLPNDRFFAVRPEGSVSTLKIQRTEQGDSAVYLCASSL
>V17RF-AACZ03053981.1-trbv |(12907, 13203)|2.28508992631|(0.916,0.735,0.805)|1
PVEAGVTQSPTHLIKTRGQQVTLRCSPISGHSSVSWYQQALGQGHQFISRYANELRRSEG
NFPNRFSGRQFHDYCSEMNVSALELGDSALYLCARSL
>V18RF-AACZ03053981.1-trbv |(15649, 15945)|2.68176090883|(0.926,0.836,0.955)|1
PVDSGVTQTPKHLITATGQQVTLRCSPRSGDLSVYWYQQSLDQGLQFLIQYYNGEESAKG
NILERFSAQQFPDLHSELNLSSLELGDSALYFCASSV
>V19RF-AACZ03053981.1-trbv |(23626, 23933)|1.95629873985|(0.875,0.530,0.956)|1
HRDAEITQSPRHKITETGRQVTLACHQTWNHNNMFWYRQDLGHGLRLIHYSYGVQDTNKG
EVSDGYSVSRSNTEDFPLTLESAASSQTSVYFCASSESTV
>V20RF-AACZ03053981.1-trbv |(31375, 31675)|2.60006971828|(0.914,0.879,0.836)|1
LSEAEVAQSPRYKITEKSQAVAFWCDPISGHATLYWYRQILGQGPELLVQFQDESVVDDS
QLPKDRFSAERLKGVDSILKIQPAELGDSAMYLCASSL
>V21RF-AACZ03053981.1-trbv |(48721, 49018)|2.35459317025|(0.906,0.678,0.980)|1
HRDAGITQSPRHKITETGRQVTLMCHQTWSHSYMFWYRQDLGHGLRLIYYSAAADITDKG
EVPDGYVVSRSKTENFPLTLESATRSQTSVYFCASSE
>V22RF-AACZ03053983.1-trbv |(4545, 4845)|2.50821496906|(0.929,0.911,0.768)|1
LTEAGVAQSPRYKIIEKRQSVAFWCNPISGHATLYWYQQILGQGPKLLIQFQNNGVVDDS
QLPKDRFSAERLKGVDSTLKIQPAKLEDSAMYLCASSL
>V23RF-AACZ03053983.1-trbv |(21546, 21843)|2.44991450479|(0.958,0.982,0.718)|1
PVNAGVTQTPKFQVLKTGQSMTLQCAQDMNHKYMYWYRQDPGMGLRLIHYSVGAGITDKG
EVPNGYNVSRSNTEDFPLSLVSAAPSQTSVYFCASSY
>V24RF-AACZ03053983.1-trbv |(25762, 26062)|2.64277338538|(0.956,0.941,0.819)|1
HTGAGVSQSPRYKVAKRGRDVALRCDSISGHVTLYWYRQTLGQGSEVLTYFRSDAQRDKS
GRPSGRFSAERPERSVSTLKIQRTEQGDSAVYLCASSL
>V25RF-AACZ03053983.1-trbv |(33686, 33982)|2.47294280967|(0.970,0.833,0.824)|1
PVDAGVTQSPTHLIKTRGQQVTLRCSPQSGHNTVSWYQQALGQGPQFIFQYYREEENGRG
NFSPRFSGRQFPNYSSELNVNALELDDSALYLCASSL
>V26RF-AACZ03053983.1-trbv |(40132, 40429)|2.61397927633|(0.971,0.892,0.841)|1
PVNAGVTQTPKFRILKIGQSMTLQCAQDMNHNYMYWYRQDPGMGLKLIYYSVGAGITDKG
EVPNGYNVSRSTTEDFPLRLESAAPSLTSVYFCASSY
>V27RF-AACZ03053984.1-trbv |(3770, 4068)|1.65487534933|(0.517,0.735,0.610)|1
HTGAGVSQSPRYEVTQRGQDVAPRCDPISGHVTLYWYRQTLGQGQEFLTSFQDETQQDKS
GLPSDQFSTERSEDLSPPEDPAHRAGRLGCVSLCQKL
>V28RF-AACZ03053984.1-trbv |(12230, 12526)|2.66957158688|(0.941,0.832,0.943)|1
PVDAGVTQSPTHLIKTRGQQVTLRCSPISGHTSVSWYQQALGQGPQFIFQYYEKEERGRG
NFPDRFSACQFPNYSSELNVNALLLGDSALYLCASSL
>V29RF-AACZ03053986.1-trbv |(8, 308)|2.74116605151|(0.904,0.955,0.893)|1
HTGAGVSQSPRYKVTKRGQDVTLRCDPISGHVALYWYRQALGQGPEFLTYFNYEAQPDKS
GLPNDRFSAERPEGSNSTLTIQRTEQRDSAMYLCASSL
>V30RF-AACZ03053986.1-trbv |(7828, 8124)|2.14797418214|(0.933,0.930,0.616)|1
LVDAGVTQSPTHLIKTRGQQVTLRCSPKSGHDTVSWYQQALGQGPQFIFQYYEEEERQRG
NFPDRFSGHQFPNYSSGLNVNALLLGDSALYLCASSL
>V31RF-AACZ03053987.1-trbv |(5059, 5356)|2.40275069359|(0.959,0.810,0.807)|1
PMNAGVTQTPKFHILKTGQSMTLQCAQDMNHGYMSWYRQDPGMGLRLIYYSAAAGTTDKG
EVPNGYNVSRLNTEDFPLRLVSAAPSQTSVYFCASSY
>V32RF-AACZ03053988.1-trbv |(2688, 3003)|2.70481467261|(0.894,0.935,0.883)|1
SISTDHTGAGVSQSPRYKVTKRGQDVTLRCDPISSHATLYWYQQALGQGPEFLTYFNYEA
QPDKSGLPNDRFSAERPEGSNSTQTIQRTEQRDSAMYLCASSL
>V33RF-AACZ03053988.1-trbv |(11127, 11423)|2.61741701327|(0.945,0.808,0.937)|1
PVDAGVTQSPTHLIKTRGQHVTLRCSPISGHTSVSWYQQALGQGPQFIFEYYEKEERGRG
NFPDRFSARQFPNYSSELNVNALLLGDSALYLCASSL
>V34RF-AACZ03053988.1-trbv |(18445, 18742)|2.62866718477|(0.902,0.899,0.842)|1
PVNAVVTQTPKFQVLKTGQSMTLQCAQDMNHDCMSWYRQDPGMGLRRIHYSVAAGITDKG
EVPDGYNVSRSNKEDLPLRLESAAPSQTSVYFCASSY
>V35RF-AACZ03053988.1-trbv |(23071, 23371)|2.72953425318|(0.918,0.882,0.936)|1
HTGAGVSQSPRYKVTKRGQDVALRCDPISGHVSLFWYQQALGQGPEFLTYFRNEAQLDKS
GLPSDRFFAERPEGSVSTLKIQRTQQEDSAVYLCASSL
>V36RF-AACZ03053988.1-trbv |(31286, 31582)|2.43677680958|(0.951,0.758,0.884)|1
PVEAGVTQSPTHLIKTRGQQVTLRCSPISGHTSVYWYQQALGLGLQFLLWYDEGEERNRG
NFPRRFSGRQFPNYSSELNVNALELEDSALYLCASSL
>V37RF-AACZ03053988.1-trbv |(40506, 40806)|2.65356899524|(0.885,0.863,0.910)|1
HADTGVSQDPSHKITKRGQNVTFRCDPISEHNRLYWYRQTLGQCPEFLTYFQNEAQLEKS
RLLSDRFSAERPKGSFSTLEIQHTEQGDSAIYLCASSL
>V38RF-AACZ03053988.1-trbv |(47037, 47334)|2.5798548145|(0.930,0.777,0.968)|1
SVAAGVIQSPRYLIKEKRETATLKCYPIPRHDTVYWYQQGPGQDPQFLISFYEKMQSDKG
SIPDRFSAQQFSDYHSELNMSSLELGDSALYFCASSS
>V39RF-AACZ03053988.1-trbv |(55269, 55566)|2.4965476101|(0.937,0.950,0.746)|1
HMDAGITQSPRHKVTETGTPVTLRCHQTENHRYMYWYRQDPGHGLRLIHYSYDVKDTDKG
EVSDGYSVSRSKTEDFLLTLESTTSSQTSVYFCAISE
>V40RF-AACZ03053989.1-trbv |(6507, 6807)|2.33183375625|(0.926,0.705,0.885)|1
LIEAGVVQSPRYKIIEKKQPVAFWCNPISGHNTLYWYWQNLGQGPELLIRYENEEAVDDS
QLPKDRFSAERLKGVDSTLKIQPAELGDSAVYLCASSL
>V41RF-AACZ03053989.1-trbv |(12103, 12403)|2.46969013592|(0.967,0.928,0.751)|1
HTDAGVIQSPRHEVTEMGQEVTLRCKPISGHNSLFWYRQTMMQGLELLIYFNNNVPIDDS
GMPKDRFSAKMPNASFSTLKIQPSEPRDSAVYFCASSL
>V42RF-AACZ03053991.1-trbv |(6886, 7186)|2.31042550083|(0.896,0.947,0.667)|1
LIDAGVTQTPRHKVTEMGQEVTMRCQPILGHNTVFWYRQTMMQGLELLAYFRNRAPLDDS
GMPKDRFSAEMLDATLATLKIQPSEPRDSAVYFCASGL
>V43RF-AACZ03053991.1-trbv |(13707, 14007)|2.47306471896|(0.928,0.815,0.823)|1
HIEAGVTQFPSHSVIEKGQTVTLRCDPVSGHDNLYWYRRVMGNEIKFLLHFVKESKQDES
GMPNNRFLAERTGGTYSTLKVQPAELEDSGVYFCASSQ
>V44RF-AACZ03053991.1-trbv |(18826, 19123)|2.43413833878|(0.837,0.852,0.766)|1
HGDAKVIQNPRYQVTQFEKPVTLGCSQNLNHNVMYWYQQKSSQAPKLLFHYYDKDFNNEA
DTPDNFQSRRPNTSFCFLDIRSPGLGDAAMYLCATSR
>V45RF-AACZ03053991.1-trbv |(23811, 24111)|2.55115457633|(0.887,0.803,0.889)|1
SPGEEVTQTPKHLVRGEGQKAKLYCAPIKGHSYVFWYQQVLKKEFKFLISFQNENVFDKT
GMPKERFSAKCLSNSPCSLEIQATKLEDSAVYFCASSQ
>V46RF-AACZ03053991.1-trbv |(41750, 42050)|2.210139976|(0.903,0.686,0.820)|1
LSNAGVMQNPRHLVRRRGQEARLRCSPVKGHNHVYWYRQLPEEGLKFMVYLQKENIIDES
GMPKERFSAEFPKEGPSILRIQQAVRGDSAAYFCASSP
>V47RF-AACZ03053991.1-trbv |(44878, 45175)|2.57278802605|(0.850,0.896,0.836)|1
TVDGGITQSPKYLFRKEGQNVTLNCEQNLNHDAMYWYRQDPGQGLRLIYYSQIVNDFQKG
DIAEGYSVSREKKESFPLTVTLAQKNPTAFYLCASSI
>V48RF-AACZ03053991.1-trbv |(52738, 53047)|2.0524124078|(0.829,0.583,0.859)|1
GSGLGAVVSQHPSRVICKSGTSVKIECRCLDFQATTMFWYRQFPKQSLMLMATSNEGSKA
TYEQGVEKDKFLINHASLTLSTLTVTSAHPEDSSFYICSAR
>V49RF-AACZ03053992.1-trbv |(7444, 7744)|2.40972137306|(0.917,0.761,0.845)|1
STDTKVTQRPRLLVKASEQKAKMDCVPIKGHSYVYWYRKKLEEELKFLIYFQNEELIQKA
EIINERFLAQCPKNSSCTLEIQSTESGDTALYFCASSK
>V50RF-AACZ03053992.1-trbv |(16518, 16818)|2.66392981862|(0.907,0.871,0.892)|1
SFHAKVTQTPGHLVKGKGQKTKMDCTPEKGHVFVYWYQQNQNKEFMLLISFQNEQVLQET
EMHKKRFSSQCPKNTPCSLAILSSEPGDTALYLCASSQ
>V51RF-AACZ03053992.1-trbv |(27256, 27554)|2.45547413026|(0.906,0.903,0.745)|1
SMDADVTQTPRNRITKTGKRIMLECSQTKGHDRMYWYRQDPGLGLRLIYYSFDVKDINKG
EISDGYSVSRQAQAKFSLSLESAIPNQTALYFCATSD
>V52RF-AACZ03053992.1-trbv |(41278, 41575)|2.75812824764|(0.913,0.926,0.920)|1
LMEADIYQTPRYLVIGTGKKIALECSQTMGHDKMYWYQQDPGMELHLIHYSYGVNSTEKG
DLSSESTVSRIRTEHFPLTLESARPSHTSQYLCASSE
>V53RF-AACZ03053994.1-trbv |(1395, 1697)|1.79469275029|(0.624,0.897,0.552)|1
LKDAVVTQFPRHRIIGTGKEFILQCSQNMNHVAMYWYRQDPGLGLKLVYYSPGTGSTEKG
DISEGYHVSRNTIASFPLTLKSASTNQTSVYLYASSSSI
>V54RF-AACZ03053994.1-trbv |(21067, 21364)|2.49474512632|(0.868,0.843,0.803)|1
PLEAQVTQNPRYLITVTGKKLTVTCSQNMNHDYMSWYRQDPGLGLRQIYYSVNVEVIDKG
DVPEGYNVSRKEKRNFPLILESPSPNQTSLYFCASSL
>V55RF-AACZ03053994.1-trbv |(26364, 26661)|2.73644677355|(0.920,0.872,0.960)|1
LVDVKVTQSSRYLVKRMGEKVFLECVQDMDHENMFWYRQDPGLGLRLIYFSYDVKMKEKG
DIPEGYSVSREKKERFSLILESASTNQTSMYLCASSL
>V56RF-AACZ03053995.1-trbv |(9498, 9801)|2.29756311536|(0.844,0.681,0.878)|1
SVFSAVISQKPSRDICQRGTSLTIQCQVNSQVTMMFWYRQQPGQSPTLIATANQGSEATY
ETGFVIDKFPISRPNLTFSTLTVSNMSPEDSSIYLCSVE
>V57RF-AACZ03066999.1-trbv |(221141, 221441)|2.39450966025|(0.833,0.760,0.823)|1
SMDTKVTQRPRLLVKANEQKAKTDCVPIKRHSYVYWYHKTLEEELKFLIYFQNEEIIQKA
EIINERFSAQCPQNSPCTLEIQSTESGDTAWYFCANSK
>V58RF-AACZ03066999.1-trbv |(230067, 230367)|2.01262428363|(0.798,0.567,0.851)|1
CFHAKVTQTPGYLVKGKGRKTKMYYTPENRHTFVCWYQQNQNKEFMFLISFQNEQVLQEM
EMHKKRFSSQCPKNPPCSLAILSSEPGDTALYLCATSP
>V59RF-AACZ03067000.1-trbv |(17891, 18182)|2.54787003685|(0.906,0.823,0.856)|1
LMEAEIYQTPRHRVIGTGKKITLECSQTMGHDKMYWSRSRNGITPHPPFLWVNSTEKGDL
SSESTVSRIRIERFPLTLESASPSHTSQYLCASSE
>V60RF-AACZ03067007.1-trbv |(7737, 8040)|2.67629443766|(0.891,0.851,0.959)|1
SVFSAVISQKPSRDICQRGTSMTIQCQVDSQVTMMFWYCQQPGQSMTLIATANQGSEATY
ESRFVIDKFPISRPNLTFSTLTVSNRRPEDSSIYLCSVE
>V61RF-AACZ03070936.1-igkv |(7433, 7733)|3.0|(1.000,1.000,1.000)|1
ARCDIQMTQSPSSLSASVGGRVTITCRASQGISNNLNWYQQKPGKTPKLLIYAASSLQSG
IPSRFSDSGSGTDYTLTISSLQPEDFATYYCQQSDSTP
>V62RF-AACZ03095312.1-trav |(4577, 4874)|1.59893317516|(0.761,0.558,0.569)|1
GTRAQSVTQLDGHITVSEEAPLELKCNYSYSGAPSLFWYVQYSSQSLQLLLKDLTEATQV
KGIKGFEAEFKKSETSFYLRKPSTHVSDAAEYFCAVG
>V63RF-AACZ03095312.1-trav |(40528, 40815)|2.51050019522|(0.864,0.821,0.836)|1
VRSQQPVQSPQAVILREGEDAVINCSSSKALYSVHWYRQKHGEAPVFLMMLLKGGEQKGH
DKISASFNEKKQQSSLYLMASQLSYSGTYFCGAE
>V64RF-AACZ03095312.1-trav |(49328, 49639)|1.70956849523|(0.617,0.555,0.564)|1
LLQVSSGDQSCYFFSSTASSMSQRVIQSQPAISTQEGETVKLDCSYKTNIVCYISYWYKR
SPNGKIIFLIYQQTDAETNMTQSQYSVSFQKATKTIQLIISS
>V65RF-AACZ03095314.1-trav |(457, 747)|2.56691409766|(0.825,0.884,0.887)|1
VSSEDKVVQSPLSLVVHEGDTVTLNCSYEVTNFQSLLWYKQEKKAPTFLFMLTSSGIEKK
SGRLSSILDKKELFSILNITATQTGDSAIYLCAVE
>V66RF-AACZ03095317.1-trav |(27773, 28074)|2.30229051085|(0.938,0.924,0.678)|1
SGMAQTVTQSQPEMSVQEAETVTLSCTYDTSESNYYLFWYKQPPSRQMILVIRQEAYKQQ
NATENRFSVNFQKAAKSFSLKISDSQLGDTAMYFCAFM
>V67RF-AACZ03095317.1-trav |(36941, 37243)|2.78778066996|(0.934,0.938,0.917)|1
FSMAQTVTQTQPEMSVQEAETVTLSCTYDTSESDYYLFWYKQPPSRQMILVIRQEAYKQQ
NATENRFSVNFQKAAKSFSLKISDSQLGDAAMYFCAYRS
>V68RF-AACZ03095319.1-trav |(17030, 17318)|2.51151530904|(0.864,0.770,0.929)|1
LSGELKVEQNPLFLSTQEGKNYTIYCNYSTTSDRLYWYRQDPGKSLESLFVLLSNGAVKQ
EGQLMASLDTKARLSTLHITAAVHDLSATYFCAV
>V69RF-AACZ03095319.1-trav |(27959, 28249)|1.8025695123|(0.797,0.606,0.635)|1
GTSSNSVKQTGQITVSEGASVTMNCTSASTGYPTPFWYVQYPSKPLQLLQRETMENSKNF
GGRNIKDKNSPVVKYSVQVSDSAVYYCLLGDTVLK
>V70RF-AACZ03095319.1-trav |(33732, 34018)|1.91838398437|(0.658,0.584,0.708)|1
VSAARNEVEQSPQDLTAQEGELITINCSYSVGINALHWLQQHPGGGIVSLFMLSSGKKKH
GRLIATINIQEKHSSLHITASHPRDSAIYICAV
>V71RF-AACZ03095321.1-trdv |(20329, 20623)|1.70363853303|(0.698,0.511,0.639)|1
MSAIELVPEHQTVTVSMGVPATLSCSMKGEAIGNYYINWYRKTQGNTMTFIYREKDIYGP
GFKDNFQGDIDIAKNLAVLKILAPSERDEGSYYCAC
>V72RF-AACZ03097606.1-trav |(3590, 3899)|2.44089765487|(0.877,0.911,0.735)|1
TIMYLVIGTAGQSLEQPSEVTAVEGAIVQINCTYQTSGFYGLSWYQQHDGGAPTFLSYNA
LDGLEETGHFSSFLSRSDSYGYLLLQKLQMKDSASYFCAVR
>V73RF-AACZ03097607.1-trav |(6104, 6407)|1.70343990027|(0.886,0.727,0.550)|1
MYLVLGTTGQNTDQPTEMTATEGAIVQINCTYQTSGFNGLFWYQQHAGEAPTFLSYNVLD
GLEEKGRFSLFLSRSKGYSYLLLKELQVKDSASYLCAVR
>V74RF-AACZ03097611.1-trav |(13724, 14040)|2.280092453|(0.918,0.704,0.846)|1
QSVAQPEDQVKVAEGNPLTVKCTYSVSGNPYLFWYVQYPNRGLQFLLKYITGDNLVKGSY
GFEAEFNKSQTSFHLKKPSALVSDSALYFCAVRDTLIGAAGGA
>V75RF-AACZ03097612.1-trav |(9441, 9731)|2.88592000218|(0.960,0.964,0.962)|1
MSRGEDVEQSLFLSVREGDSSVINCTYTDSSSTYLYWYKQEPGAGLQLLTYIFSNMDMKQ
DQRLTVLLNKKDKHLSLRIADTQTGDSAIYFCAES
>V76RF-AACZ03097613.1-trav |(2901, 3189)|2.64942223399|(0.851,0.925,0.908)|1
VKSQKIEQNSEALNIQEGKTATLTCNYTNYSPAYLQWYRQDPGRGPVFLLLIRENEKEKR
KERLKVTFDTTLKQGVFHITASQPADSATYLCAL
>V77RF-AACZ03097613.1-trav |(17275, 17562)|2.68209993149|(0.894,0.874,0.918)|1
ANGENQVEHSPHFLGPQQGDVASMSCTYSVSRFNNLQWYRQNTGMGPKHLLSMYSAGYEK
QKGRLNATLLKNGSSLYITAVQPEDSATYFCAVD
>V78RF-AACZ03097613.1-trav |(45730, 46024)|2.8984031274|(0.957,0.982,0.962)|1
GINGDSVVQTEGQVLLSEGDSLIVNCSYETTQYPSLLWYVQYPGEGPQLLLKAMKANDNG
RNKGFEATYRKETTSFHLEKDSVQESDSAVYFCALS
>V79RF-AACZ03097613.1-trav |(59820, 60113)|2.65074541806|(0.852,0.889,0.965)|1
GSGKNQVEQSPQSLIILEGKNCTLQCNYTVSPFNNLRWYKQDTGRGPVSLTIMTFSENTK
SNGRYTATLDADTKQSSLHITASQLSDSASYICVVS
>V80RF-AACZ03097613.1-trav |(75553, 75841)|2.75344440614|(0.912,0.882,0.983)|1
VWSQRKEVEQDPGPFNVPEGATVAFNCTYSNSASQSFFWYRQDCRKEPKLLMSVYSSGNE
DGRFTAQLNRASQYISLLIRDSKLSDSATYLCAV
>V81RF-AACZ03097613.1-trav |(86767, 87064)|2.44630521572|(0.929,0.789,0.837)|1
TVRAQSVTQPDIHITVSEGASLELRCNYSYGATPSLFWYVQSPGQGLQLLLKYFSGDTLV
QGIKGFEAEFKRSQSSFNLRKPSVHWSDAAEYFCAVG
>V82RF-AACZ03097614.1-trav |(12294, 12584)|2.75496931699|(0.924,0.939,0.896)|1
VNGENVEQHPSTLSVQEGDGAVIKCTYSDSASNYFPWYKQELGKGPQLIIDIHSNMGEKK
DQRIAVTLNKTAKHFSLHITETQPEDSAVYFCAAS
>V83RF-AACZ03097614.1-trav |(31772, 32063)|2.74861758657|(0.915,0.901,0.935)|1
VWSQQKEVEQNSGPLSVPEGAIVSLNCTYSDRRSQSFFWYRQYSGKSPELIMSIYSNGDE
EDGKFTAQLNKASQYVSLLIRDSQPSDSATYLCAV
>V84RF-AACZ03097614.1-trav |(38270, 38567)|2.57928544142|(0.929,0.867,0.834)|1
GTRAQSATQLDSHVSVSEGALVLLRCNYSSSVPPYLFWYVQYPNQGLQLLLKYTTGATLV
KGINGFEAEFKKSETSFHLTKPSAHVNDAAEYFCAVS
>V85RF-AACZ03097617.1-trav |(9971, 10264)|1.95762749264|(0.927,0.910,0.552)|1
VSRGESVGLHLPTLSVQEGDNSIINCAYSNSASDYFIWYKQESGKGPQFIIDIRSNMDKR
QGQRVTVLLNKTVKHLSLQIAATQLGDSAVYFCAEN
>V86RF-AACZ03097618.1-trav |(4827, 5130)|2.84713755993|(0.955,0.934,0.960)|1
PGIAQKITQTQPGMFVQEKEAVTLDCTYDTSDQSYGLFWYKQPSSGEMIFLIYQGSYDQQ
NATEGRYSLNFQKARKSANLVISASQLGDSAMYFCAMKE
>V87RF-AACZ03097618.1-trav |(21644, 21938)|2.83247644675|(0.935,0.929,0.975)|1
RTRGDSVTQMEGPVTLSEEAFLTINCTYTATGYPSLFWYVQYPGEGLQLLLKATKADDKG
SNKGFEATYRKETTSFHLEKDSVQASDSAVYFCALS
>V88RF-AACZ03097619.1-trav |(24003, 24296)|2.78470868378|(0.927,0.900,0.967)|1
VWSQQKEVEQDPGPLSVPEGAIASLNCTYSNSAFQYFMWYRQYSRKGPELLMYTYSSDNK
EDGRFTAQVDKSSKYISLFIRDSQPSDSATYLCAMS
>V89RF-AACZ03097619.1-trav |(37053, 37344)|1.79738642019|(0.926,0.749,0.595)|1
GTRAQSVTQLDSQVFEEAPVELRCNYSSSVSVYLFWYVQYPNQGLQLLLKYLSGSTLVKG
INGFEAEFKKSETSFHLRKPSVHISDAAEYFCAVS
>V90RF-AACZ03097619.1-trav |(56042, 56329)|2.73366902748|(0.908,0.889,0.943)|1
VNSQQGEEDPQALSIQEGENAIMNCSYKTSINNLQWYRQNSGRGLVHLILIRSNEREKHS
GRLRVTLDTSKKSSSLLITASRAADTASYFCATD
>V91RF-AACZ03097619.1-trav |(61564, 61886)|1.93834944572|(0.867,0.916,0.530)|1
RTSGDSVTQTEGPVTLPERAALTLNCTYQSSYSTFLFWYVQYLNKEPELLLKSSENQETD
SRGFQASPIKSDSSVHLEKPAVQLSDSAMYYCALRDRVGGTAARA
>V92RF-AACZ03097619.1-trdv |(66115, 66418)|2.26796052424|(0.761,0.763,0.745)|1
SSMAQKVTQAQTEISVVEKEDVTLDCVYETRDTTYYLFWYKQPPSGELVFLIRRNSFDEQ
NEISGRYSWNFQKSTSSFNFTITASQVVDSAVYFCALSE
>V93RF-AACZ03097619.1-trav |(99749, 100036)|2.41148420163|(0.910,0.872,0.742)|1
LSGEDQVTQSPEALRLQEGESSSLNCSYTVSGLRGLFWYRQDPGKGPEFLFALYSAGEEK
EKERLKATLTKKESFLHITAPKPEDSATYLCAVQ
>V94RF-AACZ03097619.1-trav |(111650, 111949)|2.06053076345|(0.800,0.578,0.903)|1
VSSKQEVTQIPAALSVPEGDNLVLNCSFTDSAIYNLQWFRQDPGKGLTSLLLIQSSQREQ
TSGRLNASLDKSSGRSTLYIAASQPGDSATYLCAVRHS
>V95RF-AACZ03097621.1-trav |(4277, 4574)|1.96186482256|(0.774,0.568,0.776)|1
VRGIQVEQSPPDLILQEGANSTLRCNFSASVNNLQWFHQNPWGQLINLFYIPSGTKQNGR
LSATTVATERYSLLYISSSQTTDSGVYFCAVEPQCSP
>V96RF-AACZ03097622.1-trdv |(8097, 8397)|2.08536559884|(0.781,0.592,0.923)|1
SSVAQKVTQAQSSVSMPVRKAVTLNCLYEASWWSYYIFWYKQLPSKEMVFLIRQGSGEQN
AKSGRYSVNFKKAAKSVALTISALQLEDSAKYFCAFWE
>V97RF-AACZ03097622.1-trav |(17372, 17662)|2.03861026148|(0.899,0.582,0.889)|1
VSSILNVEQSPQSLHVQEGDSTNFTCSFTSSNFYALHWYRWETAKSPEALFVMTLNGDEK
KKGRISATLNTKEGYSYLYIKGSQPEDSATYLCAF
>V98RF-AACZ03097624.1-trav |(2805, 3104)|2.1487892708|(0.879,0.848,0.636)|1
VNGQQVMQIPQYQHVQEGEDFTTYCNSSTTLSNIQWYKQRPGGHPVFLIQLVKSGEVKKQ
KRLTFQFGEAKKNSSLHITATQTTDVGTYFCAGHSAPQ
>V99RF-AACZ03097624.1-trav |(14019, 14309)|2.24994450241|(0.788,0.667,0.906)|1
TIIDAKTTQPTSMDCAEGRAANLPCNHSTISGNEYIHWYRQIHSQGPQYIIHGLKNNETN
EMASLIITEDRKSSTLILPHATLRDTAVYYCIVRV
>V100RF-AACZ03097899.1-ighv |(18928, 19237)|2.81884932287|(0.978,0.978,0.892)|1
TYSQVQLVQSGHEVKQPGASVKVSCKASGYSFTTYGMNWVRQAPGQGLEWMGWFNTYTGN
PTYAQGFTGRFVFSMDTSVSTAYLQISSLKAEDTAMYYCAR
>V101RF-AACZ03097899.1-ighv |(75199, 75508)|2.96812379208|(0.976,0.999,0.997)|1
VQCEVQLLESGGGLVQPGGSLRLSCAASGFTFSSYWMHWVRQAPGKGLEWVSRINSDGSS
TSYADSVKGRFTISRDNAKNTLYLQMNSLRAEDTAVYYCTR
>V102RF-AACZ03097899.1-ighv |(83090, 83405)|2.96878066996|(0.997,0.980,0.993)|1
VQCEVQLVESGGGLVQPGGSLRLSCAASGFTFSGSAMHWVRQASGKGLEWVGRIRSKANS
YATAYAASVKGRFTISRDDSKNTAYLQMNSLKTEDTAVYYCAR
>V103RF-AACZ03097900.1-ighv |(7950, 8265)|2.87608531693|(0.954,0.992,0.937)|1
VQCEVQLLESGGGLVQPGGSLRLSCAASGFTFSDYYMDWVRQAPGKGLEWVGRIRNKANS
YTTEYAASVKGRFTISRDDSKNSLYLQRNSLKTEDTAVYYCTR
>V104RF-AACZ03097900.1-ighv |(23404, 23719)|2.88282633717|(0.948,0.996,0.948)|1
VQCEVQLVESRGGLVQPGGSLRLSCAVSGFTFSDYYMSWVRQAPGKGLEWVGFIRNKANG
GTTEYTTSVKGRFTISRDDSKSITYLQMNSLKTEDTAVYYCSR
>V105RF-AACZ03097900.1-ighv |(27981, 28295)|2.50352753366|(0.978,0.777,0.914)|1
VLSQVTLKESGPALVKPTETLTLTCTFSGFSLSTSGMRVSWIRQPPGKALEWLARIDWDD
DKYYSTSLKTRLTISKDTSKNQVVLTMTNMDPVDTATYYCARI
>V106RF-AACZ03097900.1-ighv |(37008, 37317)|2.82420103418|(0.974,0.980,0.895)|1
VQSQVQLVQSGAEVKKPGSSVKVSCKVSGGTFSSYAISWVRQAPGQGLEWMGVIIPILGT
ANYAQKFQGRVTITADESTSTAYMELSSLRSEDTAVYYCAT
>V107RF-AACZ03097900.1-ighv |(75733, 76039)|2.99698000014|(0.998,0.999,1.000)|1
VQCEVQLVESGGGLVQPGGSLRLSCAASGFTFSSYHMSWVRQAPGKGLEWVSVIYSGGST
YYADSVKGRFTISRDNSKNTLYLQMNSLRAEDTAVYYCAR
>V108RF-AACZ03097900.1-ighv |(92730, 93036)|2.9949000027|(0.996,0.999,1.000)|1
VQCEVQLVESGGGLVQPGGSLRLSCAASGFTFSSYAMHWVRQAPGKGLEWVSLIYSGDST
YYADSVKGRFTISRDNSKNTLYLQMGSLRAEDTAVYYCAR
>V109RF-AACZ03097904.1-ighv |(3428, 3734)|2.86980713845|(0.982,0.912,0.996)|1
VLSQLQLQESGPGLVKPSETLSLTCTVSGGSISSYYWSWIRQPPGKGLEWIGYIYYSGSA
YYNPSLKSRVTISVDTSKNQFSLKLSSVTAADTAVYYCAR
>V110RF-AACZ03097905.1-ighv |(2226, 2538)|2.80383982597|(0.982,0.874,0.994)|1
VLSQLQLQESGPGLVKPSQTLSLTCTVSGGSISSGSYYWSWIRQPAGKGLEWIGNIYYSG
STYYNPSLKSRVTISVDTSKNQFSLKLSSVTAADTAVYYCAR
>V111RF-AACZ03097906.1-ighv |(13610, 13916)|2.9969280013|(0.997,1.000,1.000)|1
VQCEVQLVESGGGLVQPGGSLRLSCAASGFTVSSYHMSWVRQAPGKGLEWVSVIYSGGST
YYADSVKGRFTISRDNSKNTLYLQMNSLRAEDTAVYYCAR
>V112RF-AACZ03097906.1-ighv |(27525, 27832)|2.81900127502|(0.986,0.988,0.885)|1
VCAEVQLVQSGAEVKKPGESLKISCKGSGYSFTSYWIGWVRQMPGKGLEWMGIIYPGDSD
TRYSPSFQGQVTISADKSISTAYLQWSSLKASDTAMYYCA
>V113RF-AACZ03097906.1-ighv |(49257, 49572)|2.90080001|(0.967,0.972,0.962)|1
VQCEVQLVESGGGLVQPGRSLRLSCTASGFTFGDYAMSWIRQAPGKGLEWVGFIRSKAYG
GTTEYAASVKGRFTISRDDSKSIAYLQMNGLKTEDTAVYYCTR
>V114RF-AACZ03097906.1-ighv |(64529, 64835)|2.3106149026|(0.988,0.669,0.988)|1
VQCEDQLVESGGGLVQPGGSLRPSCAASGFAFSSYVLHWVRRAPGKGLEWVSAIGTGGDT
YYADSVMGRFTISRDNAKKSLYLQMNSLIAEDMAVYYCAR
>V115RF-AACZ03097906.1-ighv |(72260, 72569)|2.89085291224|(0.956,0.984,0.954)|1
AHSQVQLVQSGAEVKKPGASVKVSCKASGYTFTSYTISWLRQAPGQGLEWMGVISPSDGS
TSYAQKFQGRVTMTRDTSTSTVYMELSSLRSEDTAVYYCAR
>V116RF-AACZ03097906.1-ighv |(76385, 76694)|2.86237212748|(0.956,0.962,0.945)|1
AYSQMQLVQSGAEVKKPGSSVKVSCKASGYTFTYRYLHWVRQAPGQALEWMGWITPYNGN
TNYAQKFQDRVTITRDRSMSTAYMELRSLRSEDSAVYYCAR
>V117RF-AACZ03097910.1-ighv |(1033, 1344)|2.96460565256|(1.000,0.997,0.971)|1
VQCEVQLVESGGGVVQPGGSLRLSCAASGFTFDDYAMHWVRQAPGKGLEWVSLISWDGGS
TYYADSVKGRFTISRDNSKNSLYLQMNSLRAEDTALYYCAKD
>V118RF-AACZ03097912.1-ighv |(17400, 17707)|2.87753001165|(0.990,0.984,0.922)|1
VQCEVQLVESGGGLVQPESSLKLSCAASGFTFSSYAMNWVRQAPGKGLEWVAHIWNDGSQ
KYYADSVKGRFTISRDNSKSMLYLQMDSLKAEDTAMYYCT
>V119RF-AACZ03097916.1-ighv |(3845, 4154)|2.95148760715|(1.000,0.969,0.987)|1
VLSQVQLQESGPGLVKPSETLSLTCAVSGYSISSGYYWGWIRQPPGKGLEWIGSIYHSGS
TYYNPSLKSRVTISVDTSKNQFSLKLSSVTAADTAVYYCAR
>V120RF-AACZ03097918.1-ighv |(739, 1052)|1.8691933241|(0.813,0.523,0.819)|1
GGVWGRLGTAWGSLRLSCAASGFTVSSNEMSWIRQAPGKGLEWVSSISGGSAYYADSGKG
RFTISRDNSKNTLYLQMNSLRAEDTTVYYCAKDTVRGSHCAP
>V121RF-AACZ03097919.1-ighv |(14915, 15224)|2.62998084339|(0.930,0.823,0.922)|1
VQCEVQLVESGGGLVQPGGSLRLSCAASGFTFSNSDTNWVHQAPGKGLELVSGVSWNGSR
MHYADSVKGRFIISRDNSRNSLYLQTNSLRAEDTAVYYCVR
>V122RF-AACZ03098145.1-ighv |(4162, 4471)|2.91884844335|(0.951,1.000,0.981)|1
VQCQVQLVESGGGVVQPGRSLRLSCAASGFTFSSYGMHWVRQAPGKGLEWVAFISYDGSN
KHYADSVRGRFTISRDNSKNTLYLQMNRLRAEDTAVYYCAR
>V123RF-AACZ03098146.1-ighv |(6178, 6490)|2.78443322932|(0.998,0.865,0.990)|1
VLSQVQLQESGPGLVKPSQTLSLTCAVSGGSITSGYYYWSWIRQPPGKGLEWIGGIYTSG
STYYNPSLKSRVTISVDTSKNQFSLKLSSVTAADTAVYYCAR
>V124RF-AACZ03098148.1-ighv |(5185, 5491)|1.88219681756|(0.860,0.773,0.568)|1
VLSQVQLQQWGAGLVKPSETLSLTCAVYGGSFSDYYWGWVRQPPGKGLEWIGHINYGGST
NYNPSLKSRVTISVDKSKNQFSLKLSSVTAADTAVYYCAR
>V125RF-AACZ03098176.1-ighv |(689, 998)|2.84013563933|(0.983,0.936,0.938)|1
VQCQVRLVESGGGVVQPGRSLRLSCAASGFTFSSYGMHWVRQAPGKGLEWVAFIQYDGSN
KYYADSVKGRFTISKDNSKNTLYLQMNSLRAEDTAVYYCAR
>V126RF-AACZ03102011.1-ighv |(12521, 12836)|2.7095318494|(0.925,0.967,0.848)|1
VQCEVQLVESGGGLVQPGGSLRLSCAASGFTFSDHYMSWVRQAQGKGLELVGLIRNKANS
YTTEYAASVKGRFTISREDLKNTLYLQMSSPKTEDLAVYYCAR
>V127RF-AACZ03102011.1-ighv |(35465, 35774)|2.27488743833|(0.892,0.887,0.672)|1
AQSRVQLVQSGAEVKKPGASVKVSCKASGYTFTSYCMHWVRQAHAQGLEWMGLVCPSDGS
TSHAQKFQGRVTITRDTSMSTAYMELSSLRSEDMAMYYCVR
>V128RF-AACZ03106490.1-ighv |(5495, 5804)|2.86341488175|(0.927,0.976,0.982)|1
VQCEVQLVESGGGLVQPGGSLRLSCAASGFTFSSYWMHWVRQAPGKGLVWVSRINSDGSS
TSYADSLKGQFTISRDNAKNTLYLQMNSLRAEDMAVYYCTR
>V129RF-AACZ03107095.1-ighv |(2793, 3107)|2.73421360501|(0.962,0.862,0.950)|1
VLSQVTLKESGPALVKPTETLTLTCTLSGFSLSTSGMGMSWIRQPPGKALEWLAHIFSND
KKSYSTSLKNRLIISKDTSKSQVVLTMTNMDPVDTATYYCAWR
>V130RF-AACZ03126842.1-igkv |(17937, 18255)|2.22481272656|(0.976,0.651,0.946)|1
SSGDIVMTQTPLSLPVTPGEPASISCRSSESLLDTDDEHTYLNWYLQKPGQSPQLLIYEV
SNRASGVPDRFSGSGSGTDFTLKISRVEAEDVGVYYCMQALQTP
>V131RF-AACZ03126842.1-igkv |(27906, 28206)|2.95279341439|(0.997,1.000,0.961)|1
ARCDIQMTQSPSSLSASVGDRVTITCRASQGISNNLNWYQQKPGKTPKLLIYAASSLQSG
IPFRFSDSGSGTDYTLTISSLQPEDFATYYCQQSDSTP
>V132RF-AACZ03127129.1-iglv |(13910, 14207)|2.70099720894|(0.966,0.829,0.979)|1
SVASYELTQPSSVSVSPGQTARITCSGDVLAKNYARWFQQKPGQAPVLVIYKDSERPSGI
PERFSGSSSGTTVTLTISGAQVEDEADYYCYSAADNN
>V133RF-AACZ03127129.1-iglv |(32581, 32884)|2.93371286789|(0.997,0.955,0.989)|1
SEASYELTQPPSVSVSPGQTARITCSGDALPKQYAYWYQQKPGQAPVLVIYKDSERPSGI
PERFSGSSSGTTVTLTISGVQAEDEADYYCQSADSSGTY
>V134RF-AACZ03127131.1-iglv |(7169, 7472)|2.83026541037|(0.984,0.926,0.941)|1
SVTSYELTQPPSVSVAPGQTARITCGGNNIGSKAVHWYQQKPGQAPVLVIYYDSDRPSGI
PERFSGSNSGNTATLTISRVEAGDEADYYCQVWDSSSKH
>V135RF-AACZ03127131.1-iglv |(15097, 15400)|2.72897270218|(0.955,0.847,0.974)|1
SVVSSELTQDPAVSVALGQTVRITCQGDSLRSYYASWYQQKPGQAPVLVIYGNNNRPSGI
PDRFSGSSSGNTASLTITGAQAEDEADYYCSSLDSSGNH
>V136RF-AACZ03127135.1-iglv |(12358, 12661)|2.78062577958|(0.991,0.869,0.979)|1
SEASYELTQPPSVSVSLGQTARITCSGEALPKKYAYWYQQKPGQAPVLVIYKDSERPSGI
PERFSGSSSGTIVTLTISGVQAEDEADYYCQSADSSGTY
>V137RF-AACZ03127138.1-iglv |(6948, 7251)|2.15806306124|(0.921,0.886,0.635)|1
SATSYELTQPHSVSVATAQTARITCGGNNIGSKAVHWYQQKPGQDPVLVIYSNSNQPSGI
PERFSGSNPGNTATLTISRVEAGDEVDYYCQVWDSSSDH
>V138RF-AACZ03127139.1-iglv |(1837, 2140)|2.47176061164|(0.953,0.893,0.768)|1
SATSYELTQPHSVSVATAQMARITCGGNNIGSKAVHWYQQKPGQDPVLVIYSDSNRPSGI
PERFSGSNSGNTATLTISRVEAGDEVDYYCQVWDSSSDH
>V139RF-AACZ03127139.1-iglv |(22125, 22435)|2.78524548034|(0.991,0.900,0.938)|1
SWAQSALTQPPSVSRSPGQSVTISCTGTSSDVGGYNYVSWYQQHPGKAPKLMIYDVSKRP
SGVPDRFSGSKSGNTASLTISGLQAEDEADYYCCSYAGSYS
>V140RF-AACZ03127139.1-iglv |(41415, 41718)|2.93766265282|(0.987,0.963,0.990)|1
SEASYELTQPPSVSVSPGQTARITCSGDALPKQYAYWYQQKSGQAPVLIIYEDSKRPSGI
PERFSGSSSGTMATLTISGAQVEDEADYYCYSTDSSGNH
>V141RF-AACZ03127139.1-iglv |(48899, 49191)|1.9751066346|(0.624,0.819,0.691)|1
SVASYELTQPLSVSVALGQTARITCGGNNIGSKNVHWYQQKPGQAPVLVIYRDSNRPSGI
PERFSGSNSGNTATLTISRAQAGDEAITVRCGTAA
>V142RF-AACZ03127139.1-iglv |(52418, 52728)|2.63441982668|(0.994,0.956,0.813)|1
SWAQSALTQPPSASGSPGQSVTISCTGTSSDIGGYNYVSWYQQHPGKAPKLMIYEVSKRP
SGVPDRFSGSKSGNTASLTVSRLQAEDEADYYCSSYAGSNN
>V143RF-AACZ03127142.1-iglv |(7297, 7595)|2.30248011776|(0.763,0.766,0.774)|1
LCALPVLTQPPSASASLGASVKLTCTLSSEHSTYTIEWYQQRPGRSPQYIMKVKSDGSHS
KGDGIPDRFMGSSSGADRYLTISNLQSDDEAEYHCGE
>V144RF-AACZ03127143.1-iglv |(3944, 4240)|2.88594139915|(0.989,0.953,0.954)|1
SVASYELTQPPSVSVSPGQTASITCSGDKLGDKYAYWYQQKSGQSPVLVIYQDSKRPSGI
PERFSGSNSGNTATLTISGTQAMDEADYYCQAWDSST
>V145RF-AACZ03151853.1-igkv |(10232, 10550)|2.29421720066|(0.964,0.668,0.958)|1
TSGDIVMTQTPLSLPVTPGEPASISCRSSQSLLDSDDGNTYLDWFLQKPEQSPQLLIYEV
SNWASGVPDRFSGSGSGTDFTLKISRVEAEDVGVYYCMQALQTP
>V146RF-AACZ03151853.1-igkv |(38017, 38335)|1.78604886815|(0.868,0.684,0.604)|1
SSEDIVMTQTPLSLPVTPGEQASISCRSCQSLLDSDDGNTYLDLYLQKPGQSPQLLIYTL
SYRASGVSDRFSGRGSGNDFTLKISRVEAEDVEVYYCMQHIEFP
>V147RF-AACZ03151853.1-igkv |(48491, 48784)|2.99798400013|(1.000,1.000,0.998)|1
ARCDIQMTQSPSSLSASVGDRVTITCRASQSISNYLSWYQQKPGKAPKLLIYDASTLQSG
VPSRFSGSGSGTDFTLTISSLQPEDFATYYCQRGYG
>V148RF-AACZ03151853.1-igkv |(70778, 71078)|2.783310305|(0.996,0.866,0.987)|1
ARCDIQLTQSPSSLSASVGDRVTITCQASQDISNYLNWYQQKPGKVPKLLIYSASNLQSG
VPSRFSGSGSGTDFTLTISSLQPEDVATYYCQRTYNAP
>V149RF-AACZ03151853.1-igkv |(99987, 100287)|2.90171565089|(0.974,0.997,0.938)|1
ARCDIQMTQSPSSLSASVGDRVTITCQASQDISNYLNWYQQKPGKAPKLLIYDASNLETG
VPSRFSGSGSGTDFTFTISSLQPEDIATYYYQQYDNLP
>V150RF-AACZ03151853.1-igkv |(122999, 123314)|2.28136890531|(0.934,0.790,0.756)|1
SSGDVVMTQSPLSLPVTLGQPASISCRSSQSLVYSDGNTYLSWIQQRPGQPPRLLIYKVS
NRDSGVPDRFSGSGAGTDFTLKISRVEAEDVGVYYCVQGIQLP
>V151RF-AACZ03151853.1-igkv |(133574, 133889)|2.87619828468|(0.988,0.956,0.944)|1
SSADIVMTQTPLSLSVTPGQPASISCKSSQSLLHSDGNTYLYWYLQKPGQSPQLLIYRVS
NRASGVPDRFSGSGSGTDFTLKISQVEAEDVGVYYCMQGIQLP
>V152RF-AACZ03151853.1-igkv |(146050, 146365)|2.61017588067|(0.980,0.786,0.984)|1
SSGDIVMTQSPLSLPVTPGEPASISCRSSQSLLHSNRYNYLDWYLQKPGQSPQLLIYLGS
NRASGVPDRFSGSGSGTDFTLKISRVEAEDVGVYYCMQALQTP
>V153RF-AACZ03151853.1-igkv |(154335, 154635)|2.87856133106|(0.999,0.920,0.985)|1
TRCDIQMTQSPSSLSASVGDRVTITCWASQGISNYLAWYQQKPGKVPKLLIYAASTLQSG
VPSRFSGSGSGTDFTLTISSLQPEDVATYYCQKYNSAP
>V154RF-AACZ03151853.1-igkv |(190625, 190927)|2.84321501844|(0.965,0.956,0.928)|1
SSGDIVMTQTPLSSPVTLGQPASISCRSSQSLVHSDGNTYLSWLQQRPGQPPRLLIYKVS
NRFSGVPDRFSGSGAGTDFTLKISRVEAEDVGVYYCTQA
>V155RF-AACZ03151853.1-igkv |(207246, 207544)|2.36614132091|(0.992,0.687,0.998)|1
SRGEIVLTQSPDFQSVPPKEKVTITCRASQSIGSSLHWYQQKPGQSPKLLIKYASQSISG
VPSRFSGSGSGTDFTLTINSLEAEDAATYYCQQSSSL
>V156RF-AACZ03151855.1-igkv |(12698, 12994)|2.91172560727|(0.997,0.935,0.995)|1
TTGEIVLTQSSATLSLSPGERATLSCRASQSVSSSYLAWYQQKPGQAPRLLIYDASSRAT
GIPDRFSGSGSGTDFTLTISRLEPEDFAVYYCQQYGS
>V157RF-AACZ03151855.1-igkv |(28194, 28494)|2.96285201038|(0.990,0.989,0.984)|1
ARCDIQMTQSPSSLSASVGDRVTITCRASQGISNYLAWFQQKPGKAPKRLIYAASSLQSG
VPSRFSGSGSGTEFTLTISSLQPEDFATYYCLQHNSYP
>V158RF-AACZ03151855.1-igkv |(45639, 45939)|2.95386891211|(0.995,0.967,0.995)|1
ARCDIQMTQSPSSLSASVGDRVTITCRASQGISSWLAWYQQKPGKAPKPLIYAASSLQSG
VPSRFSGSGSGTEFTLTISSLQPEDFATYYCQQYNSYP
>V159RF-AACZ03151855.1-igkv |(60285, 60585)|2.33255532699|(0.958,0.966,0.678)|1
TTGEIVLTQSPATLSLSPGERATLSCRASQSVSSYLAWYQQKPGQAPRLLIYGASNRATG
IPARFSGSGSRTDFTLTISSVEPEDFAVYYCQQYNNQP
>V160RF-AACZ03151857.1-igkv |(4301, 4601)|2.90924200392|(0.997,0.932,0.997)|1
ARCAIQLTQSPSSLSASVGDRVTITCRASQGISNRLNWYQQKPGKAPKLLIYDASSLESG
VPSRFSGSGSGTDFTLTISSLQPEDFATYYCQQFNSYP
>V161RF-AACZ03151857.1-igkv |(10072, 10372)|2.87621336006|(0.986,0.983,0.923)|1
ASCDIQMTQSPSSVSASVGDRVTITCQASQGISSWLAWYQQKPGKAPKLLIYAASSLQSG
VPSRFSGNGSGTDFTLTISSLQPEDFATYYCQQANSFP
>V162RF-AACZ03151858.1-igkv |(2327, 2627)|2.85024085663|(0.999,0.928,0.952)|1
[truncated: 91,450 more chars]
