# Supplementary material for: Iterative Variable Gene Discovery from Whole Genome Sequencing with a Bootstrapped Multiresolution Algorithm
Source: Comput Math Methods Med. 2019 Feb 11;2019:3780245. doi: 10.1155/2019/3780245 (PMC6388353; doi:10.1155/2019/3780245)
Supplement: Supplementary Materials — supp_materialsV2.pdf: this is an updated document, which includes new figures requested by the reviewer. sequences_alignments.zip: these are genome sequence files that are relevant for reproducing some of the results. [file 3780245.f1.zip › 3780245.f1/sequences_alignments/bstrp_iteration_0_r.dnd]

(
(
(
(
(
V126RF-AGCE01147923.1-ighv:0.0877537
,
(
V32RF-ABGA01058270.1-ighv:0.0866644
,
(
(
V177RF-AACZ03171037.1-ighv:-0
,
V204RF-AACZ03098100.1-ighv:-0
):0.0678644
,
(
V31RF-AHZZ01091603.1-ighv:0.0552602
,
(
V270RF-AQIA01066387.1-ighv:0.0538125
,
(
V150RF-JABR01077917.1-ighv:0.0580651
,
(
V43RF-AHZZ01098942.1-ighv:0.0706845
,
(
V126RF-AQIB01153517.1-ighv:0.0565634
,
(
V66RF-ABGA01104800.1-ighv:0.0497997
,
(
V192RF-AQIA01075844.1-ighv:0.0449524
,
(
V199RF-AQIA01075860.1-ighv:0.0367491
,
(
V198RF-AQIA01075859.1-ighv:0.0433527
,
(
V149RF-JABR01077916.1-ighv:0.0420007
,
(
V24RF-JABR01074704.1-ighv:0.0370856
,
(
(
V119RF-AACZ03097916.1-ighv:0.0126039
,
(
V14RF-ABGA01037228.1-ighv:0.00498507
,
V17RF-ABGA01044304.1-ighv:0.00498507
):0.00761883
):0.0170991
,
(
(
V44RF-AHZZ01098950.1-ighv:0.0201628
,
V186RF-AQIA01075832.1-ighv:0.0201628
):0
,
V196RF-AQIA01075856.1-ighv:0.0201628
):0.00954021
):0.00738268
):0.00491508
):0.001352
):-0.0066036
):0.00820331
):0.00484727
):0.00676372
):0.0141211
):-0.0126195
):-0.00425261
):0.00144773
):0.0126042
):0.0188001
):0.00108922
):0.0012255
,
(
(
(
V218RF-AHZZ01090494.1-ighv:0.0337132
,
(
V227RF-AHZZ01096568.1-ighv:0.0100403
,
V239RF-AHZZ01103258.1-ighv:0.0100403
):0.0236729
):0.0221908
,
(
(
V82RF-AHZZ01129142.1-ighv:0.0256441
,
(
V191RF-AQIA01075834.1-ighv:0.0203681
,
V141RF-JYKQ01245888.1-ighv:0.0203681
):0.00527596
):0.0178092
,
(
V106RF-AQIB01153492.1-ighv:0.033875
,
(
V269RF-AHZZ01112481.1-ighv:0.0259099
,
V195RF-AQIA01075855.1-ighv:0.0259099
):0.00796517
):0.00957821
):0.0124508
):0.0135753
,
(
V261RF-AHZZ01108758.1-ighv:0.0712823
,
(
(
(
V109RF-AACZ03097904.1-ighv:0.00503527
,
V49RF-AJFE01045051.1-ighv:0.00503527
):0.0302827
,
(
V190RF-AHZZ01069461.1-ighv:0.0374901
,
(
V150RF-CABD02117482.1-ighv:0.033421
,
(
V21RF-ABGA01044307.1-ighv:0.0219107
,
(
V19RF-ABGA01044306.1-ighv:0.0245768
,
(
(
V111RF-ABGA01313761.1-ighv:0.0101422
,
V119RF-ADFV01131950.1-ighv:0.0101422
):0.00780787
,
(
V15RF-ABGA01044302.1-ighv:0.0153224
,
V18RF-ABGA01044305.1-ighv:0.0153224
):0.00262765
):0.00662678
):-0.00266609
):0.0115102
):0.00406917
):-0.0021722
):0.0163158
,
(
V164RF-JYKQ01015003.1-ighv:0.0392678
,
(
V94RF-JABR01035060.1-ighv:0.0203681
,
V172RF-AQIA01075814.1-ighv:0.0203681
):0.0188997
):0.012366
):0.0196486
):-0.00180297
):0.0194998
):0.386681
,
(
V222RF-JABR01190886.1-ighv:0.282142
,
(
(
V56RF-ABGA01099940.1-ighv:0.0829837
,
V116RF-ADFV01131946.1-ighv:0.0829837
):0.103928
,
(
(
V132RF-CABD02117431.1-ighv:0.0203681
,
V176RF-AACZ03171037.1-ighv:0.0203681
):0.164792
,
(
(
V55RF-JABR01089346.1-ighv:0.0648466
,
V152RF-JABR01078980.1-ighv:0.0648466
):0.0541303
,
(
(
V143RF-CABD02117467.1-ighv:0.0256441
,
(
V116RF-AACZ03097906.1-ighv:-0
,
V55RF-AJFE01045051.1-ighv:-0
):0.0256441
):0.0938157
,
(
(
V202RF-AACZ03098097.1-ighv:0.0812286
,
(
(
(
V35RF-CABD02136332.1-ighv:-0
,
V142RF-CABD02117467.1-ighv:-0
):0.0364292
,
(
V115RF-AACZ03097906.1-ighv:-0
,
V54RF-AJFE01045051.1-ighv:-0
):0.0364292
):0.0244147
,
(
(
V158RF-CABD02117766.1-ighv:0.0203681
,
V159RF-CABD02117767.1-ighv:0.0203681
):0.0215742
,
V109RF-ADFV01131933.1-ighv:0.0419423
):0.0189016
):0.0203846
):0.0177366
,
(
(
V151RF-CABD02117482.1-ighv:0.021461
,
V126RF-ADFV01131958.1-ighv:0.021461
):0.0783856
,
(
V61RF-AGCE01147749.1-ighv:0.0937902
,
(
(
(
V172RF-AACZ03171037.1-ighv:-0
,
V126RF-AJFE01045444.1-ighv:-0
):0.0546837
,
(
V80RF-JYKQ01067101.1-ighv:0.0337132
,
(
V102RF-JABR01055994.1-ighv:0.0256441
,
V129RF-AQIB01153538.1-ighv:0.0256441
):0.00806913
):0.0209705
):0.0215138
,
(
V125RF-AGCE01147919.1-ighv:0.0862899
,
(
V76RF-AGCE01148067.1-ighv:0.0651459
,
(
(
V121RF-CABD02117385.1-ighv:0.00498507
,
V205RF-AACZ03098100.1-ighv:0.00498507
):0.0512075
,
(
V130RF-JYKQ01245859.1-ighv:0.0256441
,
V206RF-JYKQ01062881.1-ighv:0.0256441
):0.0305485
):0.00895339
):0.021144
):-0.0100923
):0.0175927
):0.00605638
):-0.000881396
):0.0204946
):-0.000482842
):0.0661829
):0.00175196
):0.0952297
):0.193519
):1.64444
,
(
(
(
V18RF-ABDC01314388.1-ighv:0.134701
,
(
V59RF-AHZZ01104761.1-ighv:0.103999
,
(
(
V49RF-ABDC01375549.1-ighv:0.0465544
,
(
V72RF-ABDC01407894.1-ighv:0.0148668
,
V74RF-ABDC01417489.1-ighv:0.0148668
):0.0316876
):0.0286308
,
(
(
V20RF-JYKQ01005787.1-ighv:0.0752313
,
(
(
V33RF-ABGA01058273.1-ighv:0.00488761
,
V78RF-ABGA01174999.1-ighv:0.00488761
):0.0518851
,
(
(
V113RF-AACZ03097906.1-ighv:-0
,
V52RF-AJFE01045051.1-ighv:-0
):0.0365094
,
(
V145RF-CABD02117473.1-ighv:0.0412396
,
(
V122RF-ADFV01131954.1-ighv:0.027749
,
(
V262RF-AQIA01066385.1-ighv:0.0199615
,
V101RF-AQIB01153486.1-ighv:0.0199615
):0.00778747
):0.0134907
):-0.00473021
):0.0202633
):0.0184586
):-0.00197133
,
(
V122RF-AQIB01153511.1-ighv:0.0752584
,
(
(
V153RF-CABD02117492.1-ighv:0.0303695
,
V104RF-AACZ03097900.1-ighv:0.0303695
):0.0285143
,
(
(
V63RF-ABGA01099948.1-ighv:0.0397518
,
(
V58RF-ABGA01099941.1-ighv:0.027749
,
(
V129RF-CABD02117421.1-ighv:0.0199615
,
V169RF-AACZ03171037.1-ighv:0.0199615
):0.00778747
):0.0120029
):0.00951031
,
(
V9RF-ABGA01025808.1-ighv:0.0487098
,
(
V11RF-JABR01059011.1-ighv:0.0397518
,
(
V270RF-AHZZ01125719.1-ighv:0.035725
,
(
V272RF-AQIA01066395.1-ighv:0.0199615
,
V95RF-AQIB01153482.1-ighv:0.0199615
):0.0157635
):0.00402684
):0.00895794
):0.000552371
):0.00962158
):0.0163747
):-0.00199841
):0.00192522
):0.028814
):0.0307019
):0.00268133
,
(
V80RF-ABDC01421861.1-ighv:0.133709
,
(
(
V132RF-AGCE01148199.1-ighv:0.0527103
,
(
(
V192RF-AHZZ01084890.1-ighv:0.0150156
,
V145RF-AQIB01153558.1-ighv:0.0150156
):0.0309614
,
(
V91RF-JABR01035059.1-ighv:0.0467691
,
(
V3RF-ABGA01025791.1-ighv:0.0393192
,
(
V136RF-JYKQ01245881.1-ighv:0.0297557
,
(
V157RF-ADFV01143437.1-ighv:0.0358505
,
(
(
V257RF-AQIA01066366.1-ighv:0.0175892
,
(
(
V17RF-AHZZ01069449.1-ighv:-0
,
V15RF-JYKQ01005774.1-ighv:-0
):0.00488761
,
V256RF-AQIA01066362.1-ighv:0.00488761
):0.0127016
):0.00506992
,
(
V128RF-ADFV01131961.1-ighv:0.0199615
,
V149RF-AQIB01153566.1-ighv:0.0199615
):0.0026976
):0.0131914
):-0.00609484
):0.00956348
):0.00744987
):-0.000792056
):0.00673329
):0.0318359
,
(
V6RF-ABGA01025808.1-ighv:0.0643376
,
(
V60RF-JABR01091180.1-ighv:0.0429182
,
(
V206RF-AQIA01075865.1-ighv:0.0365737
,
(
V174RF-AQIA01075814.1-ighv:0.0307188
,
(
V140RF-AQIB01153555.1-ighv:0.027749
,
(
V154RF-CABD02117494.1-ighv:0.0148668
,
V103RF-AACZ03097900.1-ighv:0.0148668
):0.0128822
):0.00296981
):0.0058549
):0.00634456
):0.0214194
):0.0202085
):0.0491627
):0.00367358
):0.603536
,
(
(
(
(
V18RF-AHZZ01069451.1-ighv:0.00994053
,
V251RF-AQIA01066360.1-ighv:0.00994053
):0.062133
,
(
V94RF-AQIB01153481.1-ighv:0.0590085
,
(
(
V102RF-AACZ03097899.1-ighv:0.0148668
,
V4RF-AJFE01011110.1-ighv:0.0148668
):0.0269826
,
(
V41RF-JYKQ01041713.1-ighv:0.0290967
,
(
V182RF-AQIA01075825.1-ighv:0.0174141
,
(
V59RF-JABR01091180.1-ighv:0.0148668
,
V88RF-JABR01004698.1-ighv:0.0148668
):0.00254736
):0.0116825
):0.0127528
):0.0171591
):0.013065
):0.0809293
,
(
(
(
V139RF-CABD02117457.1-ighv:0.0101422
,
V118RF-AACZ03097912.1-ighv:0.0101422
):0.100162
,
(
(
V122RF-AACZ03098145.1-ighv:0.0309971
,
V125RF-AACZ03098176.1-ighv:0.0309971
):0.0709385
,
(
V73RF-ABGA01174988.1-ighv:0.121504
,
(
V268RF-AQIA01066387.1-ighv:0.101792
,
(
(
V58RF-JABR01091180.1-ighv:0.0489588
,
(
V134RF-JYKQ01245876.1-ighv:0.0447404
,
(
(
V101RF-AACZ03097899.1-ighv:-0
,
V3RF-AJFE01011110.1-ighv:-0
):0.0364292
,
(
V128RF-AACZ03106490.1-ighv:-0
,
V1RF-AJFE01003265.1-ighv:-0
):0.0364292
):0.00831115
):0.00421837
):0.0394647
,
(
V150RF-ABDC01471087.1-ighv:0.0972238
,
(
(
V49RF-JYKQ01041718.1-ighv:0.0256441
,
V108RF-AQIB01153501.1-ighv:0.0256441
):0.065353
,
(
V173RF-AACZ03171037.1-ighv:0.094068
,
(
V123RF-ADFV01131956.1-ighv:0.0953732
,
(
V61RF-ABGA01099946.1-ighv:0.079862
,
(
(
V161RF-CABD02136430.1-ighv:0.0127323
,
(
V189RF-AACZ03182257.1-ighv:0.00503527
,
V218RF-AACZ03172648.1-ighv:0.00503527
):0.00769702
):0.0851709
,
(
(
V263RF-AQIA01066387.1-ighv:0.0391858
,
(
V175RF-AQIA01075814.1-ighv:0.0309971
,
V119RF-AQIB01153509.1-ighv:0.0309971
):0.00818864
):0.0310372
,
(
(
V188RF-AQIA01075832.1-ighv:0.0151675
,
V143RF-JYKQ01245890.1-ighv:0.0151675
):0.0574364
,
(
(
V128RF-ABGA01384193.1-ighv:0.0419423
,
V131RF-ADFV01131961.1-ighv:0.0419423
):0.00559611
,
V112RF-ADFV01131940.1-ighv:0.0475384
):0.0250654
):-0.00238085
):0.0276802
):-0.0180413
):0.0155112
):-0.00130512
):-0.00307094
):0.00622667
):-0.00880028
):0.0133687
):0.0197113
):-0.0195679
):0.0083688
):0.0295135
,
(
(
V144RF-AQIB01153557.1-ighv:0.118125
,
(
(
V123RF-CABD02117395.1-ighv:0.0334453
,
(
V235RF-AHZZ01103094.1-ighv:0.0150156
,
V134RF-AQIB01153543.1-ighv:0.0150156
):0.0184297
):0.0622469
,
(
(
(
V230RF-AHZZ01096574.1-ighv:0.0100403
,
V139RF-JYKQ01245886.1-ighv:0.0100403
):0.00512712
,
V123RF-AQIB01153511.1-ighv:0.0151675
):0.0642159
,
(
V168RF-AACZ03171037.1-ighv:0.0756169
,
(
V8RF-ABGA01025808.1-ighv:0.0532634
,
(
V5RF-ABGA01025797.1-ighv:0.0419423
,
V62RF-ABGA01099947.1-ighv:0.0419423
):0.0113211
):0.0223535
):0.00376645
):0.0163088
):0.0224332
):-0.00624894
,
(
(
V131RF-AGCE01148188.1-ighv:0.076914
,
(
V263RF-JYKQ01237599.1-ighv:0.0391858
,
(
V28RF-AHZZ01091599.1-ighv:0.0364292
,
V200RF-AQIA01075862.1-ighv:0.0364292
):0.00275654
):0.0377282
):0.0276203
,
(
V9RF-ABDC01282056.1-ighv:0.0892015
,
(
(
V70RF-AGCE01147874.1-ighv:0.0526847
,
(
V17RF-JABR01066987.1-ighv:0.0181662
,
(
V12RF-AHZZ01064615.1-ighv:0.00513877
,
V203RF-JYKQ01056010.1-ighv:0.00513877
):0.0130275
):0.0345184
):0.0164975
,
(
V13RF-ABGA01025810.1-ighv:0.0480462
,
V21RF-JABR01070187.1-ighv:0.0480462
):0.0211359
):0.0200194
):0.0153327
):0.00734226
):0.0279415
):0.0131848
):0.659675
,
(
(
V115RF-AQIB01153507.1-ighv:0.143176
,
(
V7RF-ABDC01231274.1-ighv:0.12944
,
(
(
V8RF-ABDC01231277.1-ighv:0.0885098
,
(
V127RF-AJFE01045447.1-ighv:0.0900163
,
(
V141RF-ABDC01396906.1-ighv:0.0708154
,
(
V145RF-JYKQ01245904.1-ighv:0.0665945
,
(
V126RF-CABD02117416.1-ighv:0.0569083
,
(
V82RF-ABDC01423814.1-ighv:0.0556073
,
(
(
V171RF-AACZ03171037.1-ighv:0.00498507
,
V48RF-AJFE01045048.1-ighv:0.00498507
):0.0419377
,
(
V29RF-ABGA01044319.1-ighv:0.0449927
,
(
V128RF-AQIB01153537.1-ighv:0.0306801
,
V117RF-AACZ03097910.1-ighv:0.0306801
):0.0143126
):0.00193003
):0.00868451
):0.00130105
):0.00968618
):0.00422091
):0.0192009
):-0.00150648
):0.0119322
,
(
(
(
V132RF-JYKQ01245874.1-ighv:0.0567105
,
(
(
V188RF-AACZ03179884.1-ighv:0.00503527
,
V219RF-AACZ03172650.1-ighv:0.00503527
):0.0487797
,
(
V60RF-ABGA01099946.1-ighv:0.0423869
,
V125RF-CABD02117398.1-ighv:0.0423869
):0.011428
):0.00289552
):0.031876
,
(
(
V45RF-AJFE01045037.1-ighv:0.080052
,
(
V72RF-AGCE01147944.1-ighv:0.0763601
,
(
V136RF-AQIB01153553.1-ighv:0.0461394
,
(
V180RF-AQIA01075823.1-ighv:0.0337132
,
(
V60RF-AHZZ01104763.1-ighv:0.0203681
,
V266RF-AQIA01066387.1-ighv:0.0203681
):0.0133451
):0.0124262
):0.0302207
):0.00369184
):0.00379345
,
(
(
V89RF-JABR01011024.1-ighv:0.0475384
,
V75RF-AGCE01148057.1-ighv:0.0475384
):0.04776
,
(
V84RF-JABR01004697.1-ighv:0.0938527
,
(
V134RF-AGCE01148386.1-ighv:0.0735971
,
(
(
V271RF-AHZZ01125719.1-ighv:0.00503527
,
V184RF-AQIA01075827.1-ighv:0.00503527
):0.0635683
,
(
V128RF-AJFE01045453.1-ighv:0.0540284
,
(
(
V215RF-AHZZ01090491.1-ighv:0.0151675
,
V205RF-JYKQ01062878.1-ighv:0.0151675
):0.0199339
,
(
V128RF-CABD02117420.1-ighv:0.0283206
,
(
V170RF-AACZ03171037.1-ighv:0.0151675
,
V47RF-AJFE01045041.1-ighv:0.0151675
):0.0131532
):0.00678074
):0.0189271
):0.0145751
):0.00499359
):0.0202556
):0.00144568
):-0.011453
):0.00474102
):0.0112365
,
(
(
(
(
V48RF-ABDC01375549.1-ighv:-0
,
V95RF-ABDC01454767.1-ighv:-0
):0.0729865
,
(
(
V4RF-ABDC01231268.1-ighv:0.0153224
,
V154RF-ABDC01493416.1-ighv:0.0153224
):0.0357294
,
(
V10RF-ABDC01282057.1-ighv:0.0309971
,
V50RF-ABDC01377237.1-ighv:0.0309971
):0.0200546
):0.0219347
):0.015171
,
(
V124RF-AQIB01153511.1-ighv:0.0769175
,
(
V93RF-JZKE01278267.1-ighv:0.0645666
,
(
(
V65RF-ABGA01099956.1-ighv:0.0309971
,
(
V19RF-JYKQ01005784.1-ighv:0.0230061
,
(
V25RF-AHZZ01069456.1-ighv:0.00498507
,
V23RF-JYKQ01005789.1-ighv:0.00498507
):0.018021
):0.00799106
):0.0251591
,
(
V64RF-AGCE01147864.1-ighv:0.0461394
,
(
(
V155RF-CABD02117499.1-ighv:0.0309971
,
V181RF-AQIA01075825.1-ighv:0.0309971
):0.0054321
,
V114RF-AQIB01153507.1-ighv:0.0364292
):0.00971017
):0.0100168
):0.00841036
):0.0123509
):0.01124
):0.0142293
,
(
(
V6RF-ABDC01231272.1-ighv:0.00484029
,
V46RF-ABDC01373300.1-ighv:0.00484029
):0.115801
,
(
(
V96RF-JZKE01278271.1-ighv:0.0681017
,
(
V144RF-CABD02117471.1-ighv:0.0364292
,
V125RF-AJFE01045439.1-ighv:0.0364292
):0.0316725
):0.0299772
,
(
V110RF-JZKE01278614.1-ighv:0.111272
,
(
(
V89RF-ABGA01243345.1-ighv:0.0364292
,
V136RF-CABD02117444.1-ighv:0.0364292
):0.0553817
,
(
(
V118RF-ADFV01131950.1-ighv:0.0580988
,
(
V276RF-AQIA01073275.1-ighv:0.053406
,
(
(
V135RF-JYKQ01245880.1-ighv:0.0201628
,
V245RF-AQIB01158235.1-ighv:0.0201628
):0.0247257
,
(
V143RF-AQIB01153557.1-ighv:0.0364697
,
(
V209RF-AQIA01075868.1-ighv:0.0203681
,
V7RF-JYKQ01005770.1-ighv:0.0203681
):0.0161016
):0.00841868
):0.00851756
):0.00469285
):0.020157
,
(
V96RF-AQIB01153482.1-ighv:0.080167
,
(
V142RF-JYKQ01245889.1-ighv:0.0663668
,
(
V170RF-ABGA01203420.1-ighv:0.0880767
,
(
V237RF-AHZZ01103097.1-ighv:0.0554596
,
(
(
V60RF-ADFV01136793.1-ighv:0.0313208
,
V120RF-ADFV01131951.1-ighv:0.0313208
):0.0232085
,
(
V148RF-JABR01077916.1-ighv:0.0525519
,
(
V127RF-CABD02117419.1-ighv:0.0486808
,
(
(
V108RF-AACZ03097900.1-ighv:-0
,
V7RF-AJFE01011113.1-ighv:-0
):0.0299681
,
(
V152RF-CABD02117487.1-ighv:0.0127323
,
(
V107RF-AACZ03097900.1-ighv:0.00503527
,
(
V111RF-AACZ03097906.1-ighv:-0
,
V50RF-AJFE01045051.1-ighv:-0
):0.00503527
):0.00769702
):0.0172358
):0.0187128
):0.00387101
):0.00197747
):0.000930246
):0.0326171
):-0.0217099
):0.0138002
):-0.00191121
):0.0135551
):0.0194607
):-0.0131927
):0.022562
):-0.0182541
):-0.0025639
):0.000619061
):0.0289975
):0.0137364
):0.482474
,
(
(
(
(
V101RF-JABR01049702.1-ighv:0.0410805
,
V140RF-JYKQ01245888.1-ighv:0.0410805
):0.04039
,
(
(
V80RF-ABGA01194059.1-ighv:0.0251285
,
V93RF-JABR01035060.1-ighv:0.0251285
):0.0609092
,
(
V25RF-ABGA01044313.1-ighv:0.0528358
,
(
V115RF-ADFV01131944.1-ighv:0.0622133
,
(
V177RF-JYKQ01042861.1-ighv:0.0370542
,
(
V274RF-AQIA01066397.1-ighv:0.0440591
,
(
V183RF-AQIA01075826.1-ighv:0.0303695
,
V43RF-JYKQ01041713.1-ighv:0.0303695
):0.0136896
):-0.00700492
):0.0251592
):-0.00937751
):0.0332019
):-0.00456715
):0.0156035
,
(
V59RF-ABGA01099945.1-ighv:0.0936891
,
(
V175RF-AJFE01119883.1-ighv:0.0465952
,
(
V197RF-AHZZ01084893.1-ighv:0.0251285
,
V7RF-ABGA01025808.1-ighv:0.0251285
):0.0214667
):0.047094
):0.00338487
):0.0635144
,
(
(
V107RF-JZKE01278610.1-ighv:0.067915
,
(
V12RF-JZKE01244709.1-ighv:0.0419423
,
V108RF-JZKE01278611.1-ighv:0.0419423
):0.0259727
):0.0623793
,
(
V135RF-CABD02117442.1-ighv:0.133314
,
(
(
(
V97RF-JZKE01278273.1-ighv:0.0256441
,
V102RF-JZKE01278602.1-ighv:0.0256441
):0.0584369
,
(
V57RF-ABGA01099941.1-ighv:0.0918911
,
(
(
V101RF-JZKE01278602.1-ighv:0.0470928
,
(
V89RF-JZKE01278248.1-ighv:0.0410145
,
(
V87RF-JZKE01255181.1-ighv:0.0337132
,
(
V13RF-JZKE01244710.1-ighv:0.0309971
,
V103RF-JZKE01278605.1-ighv:0.0309971
):0.00271605
):0.00730135
):0.00607828
):0.0198553
,
(
V99RF-JZKE01278277.1-ighv:0.0929364
,
(
V117RF-AQIB01153509.1-ighv:0.0702721
,
(
V88RF-JZKE01255182.1-ighv:0.0664879
,
(
V148RF-CABD02117477.1-ighv:0.0645877
,
(
V46RF-AJFE01045037.1-ighv:0.0591451
,
(
V95RF-JZKE01278271.1-ighv:0.0413522
,
(
V187RF-AQIA01075832.1-ighv:0.0312907
,
(
V45RF-JYKQ01041713.1-ighv:0.0246354
,
(
V228RF-AHZZ01096568.1-ighv:0.0231598
,
(
V189RF-AHZZ01069458.1-ighv:0.0153224
,
V264RF-AQIA01066387.1-ighv:0.0153224
):0.00783738
):0.00147566
):0.00665524
):0.0100615
):0.0177929
):0.00544262
):0.00190017
):0.00378415
):0.0226643
):-0.0259883
):0.024943
):-0.00781018
):0.00699025
,
(
V10RF-JZKE01244686.1-ighv:0.0928444
,
(
V47RF-ABDC01373301.1-ighv:0.071671
,
(
V32RF-JZKE01255160.1-ighv:0.0757195
,
(
V14RF-JZKE01244715.1-ighv:0.0666728
,
(
V98RF-JZKE01278276.1-ighv:0.0510368
,
(
V109RF-JZKE01278611.1-ighv:0.0504544
,
(
V106RF-JZKE01278610.1-ighv:0.0440513
,
(
(
V81RF-JZKE01235368.1-ighv:0.0151675
,
V92RF-JZKE01278255.1-ighv:0.0151675
):0.0304088
,
(
V105RF-JZKE01278609.1-ighv:0.0421084
,
(
V94RF-JZKE01278268.1-ighv:0.0256441
,
V104RF-JZKE01278607.1-ighv:0.0256441
):0.0164644
):0.00346779
):-0.00152497
):0.00640318
):0.000582378
):0.015636
):0.0090467
):-0.00404853
):0.0211734
):-0.00177321
):0.0422432
):-0.00302003
):0.0302941
):0.482474
):0.177201
):-0.0561392
):1.0409
):4.59136
,
(
(
(
(
(
V26RF-JABR01076259.1-igkv:0.0934641
,
(
V47RF-JABR01088351.1-igkv:0.0521098
,
V12RF-AQIB01144240.1-igkv:0.0521098
):0.0413543
):0.219913
,
(
(
(
V160RF-JYKQ01005033.1-igkv:0.00782629
,
(
V222RF-AQIA01017118.1-igkv:0.00519213
,
V30RF-AQIB01144264.1-igkv:0.00519213
):0.00263416
):0.112392
,
(
(
V55RF-AHZZ01104243.1-igkv:-0
,
V225RF-AQIA01017120.1-igkv:-0
):0.00530225
,
V34RF-AQIB01144265.1-igkv:0.00530225
):0.114916
):0.145533
,
(
(
V118RF-AGCE01134619.1-igkv:0.0890605
,
(
V34RF-JZKE01097728.1-igkv:0.0613461
,
(
(
V98RF-AHZZ01040808.1-igkv:0.00974675
,
V262RF-JYKQ01187347.1-igkv:0.00974675
):0.00497413
,
V73RF-AQIA01017150.1-igkv:0.0147209
):0.0466252
):0.0277143
):0.167506
,
(
(
V56RF-AQIB01144282.1-igkv:0.0189205
,
(
V8RF-AHZZ01040804.1-igkv:0.00530225
,
V129RF-JYKQ01187337.1-igkv:0.00530225
):0.0136182
):0.232243
,
(
(
V192RF-AACZ03015561.1-igkv:0.0388607
,
(
V248RF-AQIA01017139.1-igkv:0.0253837
,
V55RF-AQIB01144282.1-igkv:0.0253837
):0.013477
):0.231647
,
(
(
V274RF-AHZZ01185532.1-igkv:0.0883022
,
(
(
V276RF-AHZZ01189922.1-igkv:0.0163229
,
V238RF-AQIA01017126.1-igkv:0.0163229
):0.070877
,
(
V194RF-AACZ03015562.1-igkv:0.0732976
,
(
(
V39RF-JABR01076263.1-igkv:0.0320311
,
(
V72RF-AHZZ01109398.1-igkv:0.0103522
,
V241RF-AQIA01017128.1-igkv:0.0103522
):0.0216789
):0.0667798
,
(
(
V93RF-ABGA01285645.1-igkv:0.0165024
,
V118RF-ABGA01321410.1-igkv:0.0165024
):0.0695233
,
(
V55RF-AGCE01134616.1-igkv:0.077366
,
(
(
V162RF-AACZ03151858.1-igkv:0.0103522
,
V26RF-AJFE01012249.1-igkv:0.0103522
):0.0440237
,
(
V124RF-ABGA01356726.1-igkv:0.0662019
,
(
V240RF-AHZZ01104243.1-igkv:0.0529601
,
(
V46RF-CABD02196588.1-igkv:0.0535838
,
(
V259RF-AHZZ01107395.1-igkv:0.0463837
,
(
V277RF-AQIA01075132.1-igkv:0.0469941
,
(
V243RF-AQIA01017128.1-igkv:0.0296561
,
(
V229RF-AQIA01017120.1-igkv:0.0212536
,
(
(
V78RF-AHZZ01117754.1-igkv:-0
,
V38RF-AQIB01144265.1-igkv:-0
):0.0210502
,
(
V41RF-JABR01076263.1-igkv:0.0103522
,
V147RF-JYKQ01005007.1-igkv:0.0103522
):0.010698
):0.000203455
):0.00840252
):0.0173379
):-0.000610389
):0.00720016
):-0.000623725
):0.0132417
):-0.011826
):0.0229901
):0.00865977
):0.0127851
):-0.0255133
):0.0139023
):0.00110234
):0.00720009
,
(
(
V235RF-AQIA01017123.1-igkv:0.0404544
,
(
V254RF-AHZZ01106331.1-igkv:0.00513877
,
V146RF-JYKQ01005004.1-igkv:0.00513877
):0.0353156
):0.057683
,
(
(
V40RF-ADFV01106193.1-igkv:0.0556357
,
(
V156RF-AACZ03151855.1-igkv:0.0104605
,
V20RF-AJFE01012236.1-igkv:0.0104605
):0.0451752
):0.0235439
,
(
V238RF-AQIB01144282.1-igkv:0.087211
,
(
V36RF-ADFV01106193.1-igkv:0.055031
,
(
V158RF-JYKQ01005032.1-igkv:0.0384483
,
(
V52RF-AHZZ01104241.1-igkv:0.0219317
,
V31RF-AQIB01144264.1-igkv:0.0219317
):0.0165166
):0.0165827
):0.03218
):-0.00803145
):0.0189578
):-0.00263509
):0.175005
):-0.0193444
):0.00540379
):0.00918522
):0.0476253
):0.947923
,
(
(
V53RF-AHZZ01104241.1-igkv:0.138883
,
(
V5RF-JZKE01218258.1-igkv:0.10995
,
(
(
V193RF-JYKQ01052443.1-igkv:0.0781064
,
(
(
(
V39RF-CABD02196554.1-igkv:0.00513877
,
V170RF-CABD02196553.1-igkv:0.00513877
):0.0268712
,
(
V148RF-AACZ03151853.1-igkv:0.015642
,
V13RF-AJFE01012232.1-igkv:0.015642
):0.016368
):0.0513473
,
(
V108RF-ADFV01106214.1-igkv:0.0847539
,
(
V52RF-JABR01088351.1-igkv:0.0722605
,
(
(
V120RF-ABGA01342015.1-igkv:0.015642
,
V153RF-AACZ03151853.1-igkv:0.015642
):0.0545471
,
(
(
V111RF-AHZZ01042084.1-igkv:0.0158068
,
V184RF-JYKQ01052440.1-igkv:0.0158068
):0.0624568
,
(
(
V262RF-AHZZ01110488.1-igkv:0.0292447
,
(
V48RF-AQIB01144274.1-igkv:0.0237342
,
(
V87RF-AHZZ01176978.1-igkv:0.0103522
,
(
V263RF-AHZZ01111138.1-igkv:-0
,
V266RF-AHZZ01111367.1-igkv:-0
):0.0103522
):0.0133821
):0.00551049
):0.0225307
,
(
V71RF-AHZZ01109397.1-igkv:0.0632942
,
(
V150RF-AQIB01156901.1-igkv:0.057039
,
(
(
V275RF-AHZZ01189918.1-igkv:0.0103522
,
V214RF-JYKQ01076935.1-igkv:0.0103522
):0.0402487
,
(
(
V53RF-AQIB01144276.1-igkv:0.0321576
,
(
V44RF-JABR01076266.1-igkv:0.0237342
,
(
V40RF-JABR01076263.1-igkv:0.0210101
,
V45RF-JABR01076266.1-igkv:0.0210101
):0.00272415
):0.00842334
):0.0158295
,
(
V33RF-JABR01076261.1-igkv:0.0533179
,
(
V57RF-AGCE01134616.1-igkv:0.0513896
,
(
V43RF-ADFV01106195.1-igkv:0.0455876
,
(
V36RF-JABR01076263.1-igkv:0.0420334
,
(
(
V265RF-AHZZ01111138.1-igkv:0.015642
,
V268RF-AHZZ01111367.1-igkv:0.015642
):0.0164523
,
(
V38RF-JABR01076263.1-igkv:0.0210101
,
V52RF-AQIB01144276.1-igkv:0.0210101
):0.0110842
):0.00993905
):0.00355424
):0.00580199
):0.00192832
):-0.00533086
):0.00261384
):0.00643812
):0.00625522
):-0.0115189
):0.0264882
):-0.00807448
):0.00207136
):0.0124934
):-0.00139657
):-0.00525084
):0.00993408
,
(
(
V42RF-AQIB01144273.1-igkv:0.0950634
,
(
V63RF-AQIA01017115.1-igkv:0.0896037
,
(
(
V230RF-AQIA01017120.1-igkv:0.0210101
,
V39RF-AQIB01144265.1-igkv:0.0210101
):0.0497625
,
(
V54RF-JABR01088351.1-igkv:0.0769503
,
(
V165RF-AACZ03151979.1-igkv:0.0664965
,
(
(
V171RF-CABD02196556.1-igkv:0.0187181
,
(
V147RF-AACZ03151853.1-igkv:0.010571
,
V12RF-AJFE01012232.1-igkv:0.010571
):0.00814705
):0.046439
,
(
V39RF-ADFV01106193.1-igkv:0.0490141
,
(
(
V77RF-AHZZ01117753.1-igkv:0.0210101
,
V153RF-JYKQ01005018.1-igkv:0.0210101
):0.0182877
,
(
V37RF-AQIB01144265.1-igkv:0.0378333
,
(
V239RF-AQIA01017128.1-igkv:0.0401739
,
(
V234RF-AQIA01017123.1-igkv:0.0384465
,
(
V253RF-AHZZ01106331.1-igkv:0.0225152
,
(
V155RF-JYKQ01005022.1-igkv:0.0185515
,
(
V228RF-AQIA01017120.1-igkv:0.010571
,
V148RF-JYKQ01005012.1-igkv:0.010571
):0.00798045
):0.00396371
):0.0159313
):0.00172741
):-0.00234062
):0.00146449
):0.00971631
):0.016143
):0.00133947
):0.0104538
):-0.00617779
):0.0188311
):0.00545978
):-0.00955366
,
(
(
(
V215RF-AQIA01017118.1-igkv:0.015642
,
V22RF-AQIB01144257.1-igkv:0.015642
):0.0408513
,
(
(
V67RF-AQIA01017115.1-igkv:0.015642
,
V188RF-JYKQ01052440.1-igkv:0.015642
):0.0248562
,
(
V164RF-ABGA01161530.1-igkv:0.0319889
,
V150RF-ADFV01132961.1-igkv:0.0319889
):0.0085093
):0.0159951
):0.0324073
,
(
(
(
V52RF-AGCE01134612.1-igkv:0.0103522
,
V53RF-AGCE01134613.1-igkv:0.0103522
):0.0584097
,
(
V115RF-ABGA01318850.1-igkv:0.0647024
,
(
(
V44RF-CABD02196586.1-igkv:0.0264584
,
(
V160RF-AACZ03151857.1-igkv:-0
,
V25RF-AJFE01012245.1-igkv:-0
):0.0264584
):0.0161165
,
(
V123RF-ABGA01356724.1-igkv:0.0390417
,
(
V142RF-ABGA01394068.1-igkv:0.0264584
,
(
V193RF-AACZ03015562.1-igkv:-0
,
V129RF-AJFE01047586.1-igkv:-0
):0.0264584
):0.0125833
):0.00353321
):0.0221275
):0.0040595
):0.0146136
,
(
(
V35RF-AQIB01144265.1-igkv:0.0344988
,
(
V157RF-JYKQ01005027.1-igkv:0.0189205
,
(
V56RF-AHZZ01104243.1-igkv:0.0161471
,
V226RF-AQIA01017120.1-igkv:0.0161471
):0.00277333
):0.0155783
):0.047081
,
(
(
(
V277RF-AHZZ01189923.1-igkv:0.0319889
,
V216RF-JYKQ01076937.1-igkv:0.0319889
):0.0151355
,
(
V237RF-AQIA01017126.1-igkv:0.0496207
,
(
V45RF-CABD02196587.1-igkv:0.0536346
,
(
V157RF-AACZ03151855.1-igkv:0.039518
,
(
V45RF-AQIB01144273.1-igkv:0.0378364
,
(
V125RF-ABGA01356729.1-igkv:0.0336346
,
(
V242RF-AQIA01017128.1-igkv:0.02684
,
(
V69RF-AHZZ01109397.1-igkv:0.0278667
,
(
V41RF-AQIB01144269.1-igkv:0.0210399
,
(
V150RF-JYKQ01005014.1-igkv:0.0210697
,
(
V232RF-AQIA01017123.1-igkv:0.0129971
,
(
V251RF-AHZZ01106331.1-igkv:0.0103522
,
V236RF-AQIA01017125.1-igkv:0.0103522
):0.0026449
):0.00807268
):-2.98396e-05
):0.0068268
):-0.0010267
):0.00679455
):0.00420183
):0.00168161
):0.0141167
):-0.00401393
):-0.00249629
):0.0107522
,
(
(
V167RF-ABGA01180644.1-igkv:0.0390507
,
(
V149RF-JYKQ01005013.1-igkv:0.00774547
,
(
V252RF-AHZZ01106331.1-igkv:0.00513877
,
V233RF-AQIA01017123.1-igkv:0.00513877
):0.0026067
):0.0313052
):0.00889091
,
(
(
(
(
V57RF-AHZZ01104243.1-igkv:-0
,
V227RF-AQIA01017120.1-igkv:-0
):0
,
V156RF-JYKQ01005026.1-igkv:-0
):0.00530225
,
V36RF-AQIB01144265.1-igkv:0.00530225
):0.0526593
,
(
(
V117RF-ABGA01321409.1-igkv:0.010684
,
V209RF-ABGA01276916.1-igkv:0.010684
):0.0393238
,
(
V41RF-ADFV01106195.1-igkv:0.037647
,
(
V121RF-ABGA01356721.1-igkv:0.0264584
,
V40RF-CABD02196563.1-igkv:0.0264584
):0.0111886
):0.0123608
):0.00795383
):-0.01002
):0.00993505
):0.0237032
):0.00179569
):0.00552507
):-0.00339078
):0.00253075
):0.0219093
):0.0289332
):0.414838
,
(
V62RF-ABDC01394567.1-igkv:0.210466
,
(
(
V224RF-AQIA01017118.1-igkv:0.175459
,
(
(
(
V125RF-AHZZ01042093.1-igkv:0.0264584
,
(
V56RF-AQIA01017097.1-igkv:0.0210101
,
V197RF-JYKQ01052444.1-igkv:0.0210101
):0.00544831
):0.0606341
,
(
(
V164RF-CABD02196515.1-igkv:0.0129971
,
(
V195RF-AACZ03015562.1-igkv:0.00513877
,
V87RF-AJFE01002289.1-igkv:0.00513877
):0.0078583
):0.0534164
,
(
(
V48RF-AQIA01017096.1-igkv:0.0257876
,
(
V4RF-AQIB01144236.1-igkv:0.0196881
,
(
V48RF-JABR01088351.1-igkv:0.0129971
,
(
V117RF-AHZZ01042093.1-igkv:0.00513877
,
V201RF-JYKQ01052450.1-igkv:0.00513877
):0.0078583
):0.00669103
):0.00609951
):0.0248621
,
(
V141RF-ADFV01132961.1-igkv:0.0419457
,
(
(
V197RF-AACZ03015754.1-igkv:0.0103522
,
V9RF-AJFE01011588.1-igkv:0.0103522
):0.0133821
,
(
V206RF-ABGA01257772.1-igkv:0.015642
,
V49RF-CABD02199693.1-igkv:0.015642
):0.00809225
):0.0182115
):0.00870395
):0.0157638
):0.020679
):0.0449489
,
(
V199RF-AACZ03016143.1-igkv:0.129482
,
(
V85RF-ABGA01198108.1-igkv:0.133793
,
(
(
(
V105RF-AHZZ01042080.1-igkv:0.0210101
,
V18RF-AQIB01144243.1-igkv:0.0210101
):0.0370009
,
(
V129RF-AHZZ01042093.1-igkv:0.0433051
,
V59RF-AQIA01017099.1-igkv:0.0433051
):0.0147059
):0.0410593
,
(
V145RF-ADFV01132961.1-igkv:0.101062
,
(
(
V154RF-ADFV01132961.1-igkv:0.0380123
,
V46RF-AGCE01134604.1-igkv:0.0380123
):0.0631888
,
(
(
V143RF-ABGA01394071.1-igkv:0.0699427
,
(
(
V212RF-AQIA01007908.1-igkv:0.0210101
,
V14RF-AQIB01144242.1-igkv:0.0210101
):0.0420911
,
(
V127RF-AHZZ01042093.1-igkv:0.0474547
,
(
(
V211RF-AACZ03151873.1-igkv:0.00513877
,
V230RF-AACZ03183442.1-igkv:0.00513877
):0.0262337
,
(
V212RF-AACZ03151911.1-igkv:0.0248447
,
(
V222RF-AACZ03178854.1-igkv:0.0164931
,
(
V0RF-CABD02043817.1-igkv:0.0173443
,
(
(
V61RF-AACZ03070936.1-igkv:0.00904881
,
(
V182RF-CABD02379503.1-igkv:0.00774547
,
(
V173RF-CABD02196901.1-igkv:0.00513877
,
V181RF-CABD02379427.1-igkv:0.00513877
):0.0026067
):0.00130335
):0.00464105
,
(
V229RF-AACZ03179806.1-igkv:0.00774547
,
(
V131RF-AACZ03126842.1-igkv:0.00513877
,
V223RF-AACZ03179013.1-igkv:0.00513877
):0.0026067
):0.0059444
):0.00365447
):-0.000851179
):0.00835152
):0.00652778
):0.0160822
):0.0156465
):0.00684153
):0.0138974
,
(
V41RF-AGCE01134600.1-igkv:0.0860223
,
(
(
V199RF-JYKQ01052444.1-igkv:0.058184
,
(
V108RF-AHZZ01042083.1-igkv:0.0581879
,
(
V191RF-JYKQ01052441.1-igkv:0.0351525
,
(
V51RF-JABR01088351.1-igkv:0.0327013
,
(
(
V61RF-AQIA01017105.1-igkv:-0
,
V134RF-AQIA01058133.1-igkv:-0
):0.0223922
,
(
V53RF-JABR01088351.1-igkv:0.018326
,
(
V114RF-AHZZ01042085.1-igkv:0.00513877
,
V17RF-AQIB01144243.1-igkv:0.00513877
):0.0131872
):0.00406618
):0.0103091
):0.00245123
):0.0230354
):-3.88175e-06
):0.0116398
,
(
V196RF-AACZ03015564.1-igkv:0.0565394
,
(
V61RF-ADFV01138112.1-igkv:0.0462001
,
(
V215RF-JYKQ01076937.1-igkv:0.0376037
,
V44RF-AQIB01144273.1-igkv:0.0376037
):0.00859634
):0.0103393
):0.0132844
):0.0161984
):-0.00218218
):0.0173609
):-0.000139162
):-0.0019916
):0.0347226
):-0.00431129
):0.0025598
):0.0434174
):-0.0215826
,
(
(
V148RF-ADFV01132961.1-igkv:0.104087
,
(
(
V21RF-AQIB01144251.1-igkv:0.0490951
,
V14RF-AJFE01012232.1-igkv:0.0490951
):0.0227316
,
(
V104RF-JABR01061517.1-igkv:0.0639862
,
(
V101RF-AHZZ01042078.1-igkv:0.0264584
,
V190RF-JYKQ01052440.1-igkv:0.0264584
):0.0375279
):0.00784048
):0.0322599
):0.0270912
,
(
(
V97RF-AHZZ01040807.1-igkv:0.0103522
,
V71RF-AQIA01017140.1-igkv:0.0103522
):0.117438
,
(
(
V42RF-AGCE01134600.1-igkv:0.0997416
,
(
V31RF-JABR01076261.1-igkv:0.101491
,
(
(
V163RF-CABD02196513.1-igkv:0.0319889
,
V190RF-AACZ03015561.1-igkv:0.0319889
):0.056325
,
(
V53RF-JYKQ01051984.1-igkv:0.0926588
,
(
(
V213RF-JYKQ01075085.1-igkv:0.0347963
,
(
V260RF-AHZZ01107399.1-igkv:0.00513877
,
V180RF-JYKQ01044662.1-igkv:0.00513877
):0.0296576
):0.0335297
,
(
(
V48RF-CABD02196595.1-igkv:-0
,
V88RF-AJFE01002352.1-igkv:-0
):0.084943
,
(
V61RF-AHZZ01105091.1-igkv:0.0797319
,
(
(
V166RF-ABGA01180641.1-igkv:0.010684
,
V168RF-ABGA01180644.1-igkv:0.010684
):0.052517
,
(
V161RF-AACZ03151857.1-igkv:0.0563685
,
(
V94RF-ABGA01285648.1-igkv:0.0617261
,
(
V35RF-JABR01076261.1-igkv:0.0559532
,
(
V23RF-AJFE01012238.1-igkv:0.0444292
,
(
V163RF-AACZ03151858.1-igkv:0.0426254
,
(
V95RF-ABGA01285649.1-igkv:0.0334137
,
(
V166RF-CABD02196521.1-igkv:0.0210101
,
(
V42RF-ADFV01106195.1-igkv:0.0103522
,
V158RF-AACZ03151855.1-igkv:0.0103522
):0.0106579
):0.0124036
):0.0092117
):0.00180385
):0.011524
):0.00577284
):-0.0053576
):0.00683252
):0.0165309
):0.00521102
):-0.0166169
):0.0243327
):-0.00434484
):0.0131769
):-0.0017492
):0.0179353
,
(
(
V3RF-ABDC01165520.1-igkv:-0
,
V110RF-ABDC01522041.1-igkv:-0
):0.114085
,
(
V51RF-AGCE01134610.1-igkv:0.0860075
,
(
(
V51RF-JYKQ01051981.1-igkv:0.0319889
,
V221RF-JYKQ01081225.1-igkv:0.0319889
):0.0271334
,
(
V54RF-AGCE01134614.1-igkv:0.0538792
,
(
V50RF-AQIB01144276.1-igkv:0.0544507
,
(
V246RF-AQIA01017135.1-igkv:0.0419457
,
(
V244RF-AQIA01017130.1-igkv:0.0237342
,
(
V245RF-AQIA01017133.1-igkv:0.0103522
,
V178RF-JYKQ01044654.1-igkv:0.0103522
):0.0133821
):0.0182115
):0.012505
):-0.000571456
):0.00524307
):0.0268852
):0.0280772
):0.00359214
):0.0101132
):0.00338773
):0.0226983
):0.0565897
):0.414838
):0.533085
):0.963654
,
(
(
(
(
V144RF-ADFV01132961.1-igkv:0.114523
,
(
V41RF-ABDC01360666.1-igkv:0.0909202
,
(
V39RF-AGCE01134600.1-igkv:0.0814412
,
(
(
V138RF-ABGA01394062.1-igkv:0.0372039
,
V147RF-ADFV01132961.1-igkv:0.0372039
):0.0294282
,
(
V43RF-AGCE01134602.1-igkv:0.0723565
,
(
V56RF-JYKQ01052451.1-igkv:0.0521623
,
(
V47RF-AGCE01134604.1-igkv:0.0522143
,
(
(
V151RF-AACZ03151853.1-igkv:0.00488761
,
V16RF-AJFE01012234.1-igkv:0.00488761
):0.047494
,
(
V115RF-AHZZ01042091.1-igkv:0.0356862
,
V47RF-AQIA01017094.1-igkv:0.0356862
):0.0166954
):-0.000167277
):-5.19864e-05
):0.0201942
):-0.0057244
):0.0148091
):0.00947902
):0.0236027
):0.0297683
,
(
(
V34RF-ABDC01351837.1-igkv:0.0641527
,
V33RF-JZKE01296733.1-igkv:0.0641527
):0.0531302
,
(
(
V169RF-CABD02196547.1-igkv:0.0602823
,
V182RF-JYKQ01052439.1-igkv:0.0602823
):0.0182866
,
(
V154RF-AACZ03151853.1-igkv:-0
,
V18RF-AJFE01012235.1-igkv:-0
):0.0785689
):0.0387139
):0.0270084
):0.379768
,
(
(
V115RF-AGCE01112674.1-iglv:0.112027
,
(
V196RF-ABGA01252243.1-iglv:0.0364292
,
(
V54RF-CABD02231359.1-iglv:-0
,
V112RF-AJFE01020634.1-iglv:-0
):0.0364292
):0.0755982
):0.254179
,
(
V6RF-JABR01043229.1-iglv:0.392447
,
(
(
(
(
V71RF-CABD02231431.1-iglv:0.010684
,
(
V144RF-AACZ03127143.1-iglv:-0
,
V98RF-AJFE01017581.1-iglv:-0
):0.010684
):0.0987112
,
(
V31RF-JZKE01249959.1-iglv:0.0995598
,
(
V112RF-AGCE01112648.1-iglv:0.10141
,
(
(
(
V288RF-AHZZ01198553.1-iglv:0.0154805
,
V16RF-AQIA01007576.1-iglv:0.0154805
):0.0532711
,
(
V233RF-JYKQ01126546.1-iglv:0.0574469
,
(
(
V126RF-JABR01071856.1-iglv:0.0261813
,
V235RF-JYKQ01126546.1-iglv:0.0261813
):0.0167032
,
(
V244RF-AHZZ01105199.1-iglv:0.0316513
,
V9RF-AQIA01007576.1-iglv:0.0316513
):0.0112331
):0.0145624
):0.0113048
):0.0220181
,
(
V182RF-ABGA01252218.1-iglv:0.0739075
,
(
V54RF-ADFV01126759.1-iglv:0.0588294
,
(
V68RF-CABD02231422.1-iglv:0.0581383
,
(
(
V183RF-ABGA01252219.1-iglv:0.00508649
,
V184RF-ABGA01252219.1-iglv:0.00508649
):0.0449654
,
(
V134RF-AACZ03127131.1-iglv:0.0316926
,
(
V91RF-AJFE01010827.1-iglv:0.0207916
,
V94RF-AJFE01010828.1-iglv:0.0207916
):0.010901
):0.0183594
):0.00808636
):0.000691105
):0.0150781
):0.0168622
):0.0106399
):-0.00184981
):0.00983539
):0.0479806
,
(
V81RF-AQIB01146137.1-iglv:0.137185
,
(
(
(
V284RF-AHZZ01198551.1-iglv:0.0345112
,
(
V114RF-JABR01071855.1-iglv:0.0207916
,
V4RF-AQIA01007574.1-iglv:0.0207916
):0.0137195
):0.0176115
,
(
V56RF-ADFV01126760.1-iglv:0.0429056
,
(
(
V180RF-ABGA01252215.1-iglv:0.0207916
,
(
V140RF-AACZ03127139.1-iglv:-0
,
V100RF-AJFE01017584.1-iglv:-0
):0.0207916
):0.00538962
,
V69RF-CABD02231427.1-iglv:0.0261813
):0.0167244
):0.00921706
):0.0505612
,
(
(
V61RF-CABD02231410.1-iglv:0.0104605
,
(
V132RF-AACZ03127129.1-iglv:-0
,
V95RF-AJFE01010829.1-iglv:-0
):0.0104605
):0.0872066
,
(
V287RF-AHZZ01198553.1-iglv:0.0590831
,
(
V62RF-CABD02231415.1-iglv:0.0316926
,
(
V133RF-AACZ03127129.1-iglv:0.0207916
,
V136RF-AACZ03127135.1-iglv:0.0207916
):0.010901
):0.0273905
):0.038584
):0.00501673
):0.0345013
):0.0201907
):0.0735785
,
(
(
(
V94RF-ABDC01449636.1-iglv:0.0237342
,
(
V29RF-ABDC01349230.1-iglv:0.00513877
,
V56RF-ABDC01384523.1-iglv:0.00513877
):0.0185954
):0.0900205
,
(
V27RF-ABDC01349227.1-iglv:0.0677794
,
V27RF-JZKE01249957.1-iglv:0.0677794
):0.0459753
):0.0516197
,
(
V113RF-AGCE01112648.1-iglv:0.104421
,
(
(
V185RF-ABGA01252219.1-iglv:0.0428411
,
V83RF-AQIB01146137.1-iglv:0.0428411
):0.0115369
,
V121RF-JABR01071856.1-iglv:0.054378
):0.0500428
):0.0609537
):0.0655799
):0.161493
):-0.0262407
):0.157853
):1.30289
,
(
(
(
(
V209RF-AACZ03127321.1-iglv:-0
,
V116RF-AJFE01022798.1-iglv:-0
):0.309765
,
(
V73RF-AQIB01146122.1-iglv:0.09008
,
(
(
V19RF-JZKE01249933.1-iglv:0.0203681
,
V85RF-JZKE01238800.1-iglv:0.0203681
):0.055117
,
(
(
V257RF-JYKQ01126589.1-iglv:0.0364495
,
(
V213RF-AHZZ01089508.1-iglv:0.0364697
,
(
V139RF-JABR01071862.1-iglv:0.0203681
,
V34RF-AQIA01007589.1-iglv:0.0203681
):0.0161016
):-2.0247e-05
):0.0269968
,
(
V111RF-AJFE01020632.1-iglv:0.0607092
,
(
V45RF-ADFV01126738.1-iglv:0.054952
,
(
V109RF-AJFE01020631.1-iglv:0.0378278
,
(
(
V21RF-AQIA01007586.1-iglv:0.0100403
,
V70RF-AQIB01146122.1-iglv:0.0100403
):0.0117037
,
(
V203RF-AHZZ01089506.1-iglv:0.0151675
,
V246RF-JYKQ01126581.1-iglv:0.0151675
):0.00657658
):0.0160837
):0.0171243
):0.00575721
):0.00273702
):0.0120388
):0.0145949
):0.219685
):0.148475
,
(
(
(
V119RF-ABGA01335280.1-iglv:0.0369781
,
(
V50RF-CABD02231299.1-iglv:0.0205777
,
(
V210RF-AACZ03127321.1-iglv:-0
,
V117RF-AJFE01022798.1-iglv:-0
):0.0205777
):0.0164004
):0.0208269
,
(
V128RF-AGCE01147939.1-iglv:0.0506876
,
(
V147RF-JABR01077603.1-iglv:0.0313208
,
V41RF-AQIA01007605.1-iglv:0.0313208
):0.0193668
):0.00711736
):0.321193
,
(
(
V90RF-ABDC01442374.1-iglv:0.0805235
,
(
V77RF-ABDC01418168.1-iglv:0.0862831
,
(
(
V24RF-ABDC01342328.1-iglv:0.0309971
,
V145RF-ABDC01425625.1-iglv:0.0309971
):0.0253502
,
(
V75RF-ABDC01417539.1-iglv:0.0583681
,
(
(
(
V158RF-ABDC01540867.1-iglv:-0
,
V162RF-ABDC01624510.1-iglv:-0
):0.0283206
,
(
V83RF-JZKE01238797.1-iglv:0.0203681
,
V84RF-JZKE01238799.1-iglv:0.0203681
):0.0079525
):0.00919853
,
(
V21RF-JZKE01249944.1-iglv:0.0364697
,
(
V14RF-ABDC01296165.1-iglv:0.0256441
,
(
V37RF-ABDC01359388.1-iglv:-0
,
V149RF-ABDC01465190.1-iglv:-0
):0.0256441
):0.0108257
):0.0010494
):0.020849
):-0.00202083
):0.0299358
):-0.00575957
):0.0286994
,
(
(
V200RF-ABGA01252248.1-iglv:0.0457743
,
(
V145RF-JABR01077601.1-iglv:0.041449
,
(
(
(
V34RF-AHZZ01097949.1-iglv:0.00994053
,
V219RF-JYKQ01080923.1-iglv:0.00994053
):0.0102222
,
V39RF-AQIA01007600.1-iglv:0.0201628
):0.0218436
,
(
V59RF-AQIB01146122.1-iglv:0.0296786
,
(
V35RF-AQIA01007590.1-iglv:0.0283987
,
(
V45RF-AHZZ01099970.1-iglv:0.0203681
,
V78RF-JYKQ01062966.1-iglv:0.0203681
):0.00803057
):0.00127995
):0.0123277
):-0.000557426
):0.00432532
):0.0430281
,
(
V143RF-JABR01077601.1-iglv:0.0595365
,
(
(
V187RF-AACZ03176987.1-iglv:0.0153599
,
(
V52RF-CABD02231318.1-iglv:0.0101422
,
V207RF-AACZ03127313.1-iglv:0.0101422
):0.00521776
):0.0105499
,
V115RF-AJFE01022796.1-iglv:0.0259099
):0.0336266
):0.0292659
):0.0204205
):0.269775
):0.0792418
):0.957951
,
(
(
V32RF-AHZZ01097944.1-iglv:-0
,
V84RF-JYKQ01114545.1-iglv:-0
):0.362833
,
(
(
V14RF-AQIA01007576.1-iglv:0.0316513
,
(
V135RF-AACZ03127131.1-iglv:-0
,
V92RF-AJFE01010827.1-iglv:-0
):0.0316513
):0.259423
,
(
(
(
V84RF-AQIB01146138.1-iglv:0.0400225
,
(
V243RF-AHZZ01105199.1-iglv:0.0316513
,
V46RF-AQIA01009608.1-iglv:0.0316513
):0.00837116
):0.0707746
,
(
V230RF-JYKQ01126545.1-iglv:0.102198
,
(
(
V177RF-ABGA01252206.1-iglv:0.0828461
,
(
(
V113RF-JABR01071855.1-iglv:0.0154805
,
V119RF-JABR01071856.1-iglv:0.0154805
):0.0456302
,
(
V93RF-AJFE01010827.1-iglv:0.0736916
,
(
V70RF-CABD02231427.1-iglv:0.0505496
,
(
(
V142RF-AACZ03127139.1-iglv:0.0100403
,
V101RF-AJFE01017584.1-iglv:0.0100403
):0.0487865
,
(
V237RF-JYKQ01126546.1-iglv:0.0667473
,
(
V181RF-ABGA01252216.1-iglv:0.0627611
,
(
(
V76RF-AQIB01146133.1-iglv:0.0181361
,
(
V43RF-AQIA01009600.1-iglv:0.0154805
,
V232RF-JYKQ01126546.1-iglv:0.0154805
):0.00265555
):0.0236739
,
(
V11RF-AQIA01007576.1-iglv:0.0374274
,
(
V66RF-CABD02231419.1-iglv:0.0432459
,
(
V124RF-JABR01071856.1-iglv:0.0465316
,
(
V240RF-JYKQ01126546.1-iglv:0.0338396
,
(
(
V281RF-AHZZ01198550.1-iglv:-0
,
V229RF-JYKQ01126545.1-iglv:-0
):0.0252617
,
(
V241RF-AHZZ01105198.1-iglv:0.031624
,
(
V90RF-AQIB01146141.1-iglv:0.0299741
,
(
V87RF-AQIB01146140.1-iglv:0.0290339
,
(
V86RF-AQIB01146140.1-iglv:0.0255098
,
(
V7RF-AQIA01007575.1-iglv:0.0194734
,
(
V2RF-AQIA01007574.1-iglv:0.0155189
,
(
(
V289RF-AHZZ01198553.1-iglv:0.0100403
,
V226RF-JYKQ01126545.1-iglv:0.0100403
):0.000205752
,
V6RF-AQIA01007574.1-iglv:0.0102461
):0.00527277
):0.00395458
):0.00603641
):0.00352403
):0.000940267
):0.00164981
):-0.00636229
):0.00857798
):0.0126919
):-0.00328571
):-0.00581845
):0.00438261
):0.0209511
):0.00398619
):-0.00792046
):-0.0082773
):0.023142
):-0.0125809
):0.0217354
):-0.0136183
,
(
(
V115RF-JABR01071855.1-iglv:0.0439633
,
(
V283RF-AHZZ01198551.1-iglv:0.0442354
,
(
V80RF-AQIB01146136.1-iglv:0.0373097
,
(
V52RF-ADFV01126756.1-iglv:0.0311821
,
(
(
V139RF-AACZ03127139.1-iglv:0.0100403
,
(
V231RF-AACZ03191230.1-iglv:-0
,
V102RF-AJFE01017586.1-iglv:-0
):0.0100403
):0.015954
,
(
V249RF-AHZZ01105201.1-iglv:0.0102461
,
V111RF-JABR01071855.1-iglv:0.0102461
):0.0157482
):0.00518776
):0.00612764
):0.00692568
):-0.00027211
):0.0143416
,
(
V67RF-CABD02231421.1-iglv:0.037994
,
(
V221RF-AACZ03177116.1-iglv:0.0323952
,
(
V188RF-ABGA01252219.1-iglv:0.0283206
,
(
V186RF-ABGA01252219.1-iglv:0.0203681
,
V187RF-ABGA01252219.1-iglv:0.0203681
):0.0079525
):0.00407457
):0.00559879
):0.020311
):0.0109229
):0.0329706
):0.00859858
):0.0988545
,
(
(
(
V20RF-ABDC01318810.1-iglv:0.0368125
,
(
V81RF-ABDC01422153.1-iglv:-0
,
V96RF-ABDC01466438.1-iglv:-0
):0.0368125
):0.0408832
,
V82RF-JZKE01238797.1-iglv:0.0776957
):0.0684391
,
(
(
V140RF-JABR01071862.1-iglv:0.110566
,
(
(
V127RF-JABR01071859.1-iglv:0.0448447
,
(
(
V208RF-AHZZ01089506.1-iglv:0.0100403
,
V18RF-AQIA01007584.1-iglv:0.0100403
):0.0156037
,
V74RF-AQIB01146123.1-iglv:0.0256441
):0.0192007
):0.0488577
,
(
(
V82RF-JABR01189674.1-iglv:-0
,
V137RF-JABR01071862.1-iglv:-0
):0.0746469
,
(
(
V68RF-AQIB01146122.1-iglv:0.0406258
,
(
V4RF-JABR01016432.1-iglv:0.0337132
,
(
V27RF-AQIA01007587.1-iglv:0.0256441
,
V250RF-JYKQ01126585.1-iglv:0.0256441
):0.00806913
):0.00691263
):0.0236985
,
(
(
(
V194RF-ABGA01252241.1-iglv:0.0203681
,
V197RF-ABGA01252243.1-iglv:0.0203681
):0.0347533
,
(
V134RF-JABR01071861.1-iglv:0.0475597
,
(
V64RF-AQIB01146122.1-iglv:0.0323552
,
(
V258RF-JYKQ01126589.1-iglv:0.0230061
,
(
V214RF-AHZZ01089508.1-iglv:0.0100403
,
V28RF-AQIA01007588.1-iglv:0.0100403
):0.0129657
):0.00934909
):0.0152046
):0.00756163
):0.00265652
,
(
(
V107RF-AJFE01020631.1-iglv:0.0230254
,
(
V184RF-AACZ03176953.1-iglv:0.0256826
,
(
V57RF-CABD02231362.1-iglv:0.0100403
,
V59RF-CABD02231364.1-iglv:0.0100403
):0.0156423
):-0.00265726
):0.02454
,
(
V46RF-ADFV01126738.1-iglv:0.0364697
,
(
V50RF-ADFV01126742.1-iglv:0.0203681
,
V140RF-ADFV01132918.1-iglv:0.0203681
):0.0161016
):0.0110957
):0.0102125
):0.00654644
):0.0103226
):0.0190555
):0.0168639
):0.0204324
,
(
(
V204RF-AHZZ01089506.1-iglv:0.0596283
,
V22RF-AQIA01007586.1-iglv:0.0596283
):0.0522263
,
(
V121RF-AGCE01135277.1-iglv:0.114857
,
(
(
(
V205RF-AHZZ01089506.1-iglv:0.00503527
,
V24RF-AQIA01007586.1-iglv:0.00503527
):0.044667
,
(
V244RF-JYKQ01126580.1-iglv:0.0313208
,
V72RF-AQIB01146122.1-iglv:0.0313208
):0.0183814
):0.0108047
,
(
V23RF-AQIA01007586.1-iglv:0.0572214
,
(
V131RF-JABR01071860.1-iglv:0.0588839
,
(
(
V206RF-AHZZ01089506.1-iglv:0.0205777
,
V245RF-JYKQ01126580.1-iglv:0.0205777
):0.0392705
,
(
(
V25RF-AQIA01007586.1-iglv:0.0313612
,
(
V132RF-JABR01071860.1-iglv:0.0203681
,
V138RF-JABR01071862.1-iglv:0.0203681
):0.0109931
):0.0262175
,
(
V71RF-AQIB01146122.1-iglv:0.0466602
,
(
V61RF-AQIB01146122.1-iglv:0.0439296
,
(
V248RF-JYKQ01126581.1-iglv:0.0424718
,
(
(
V32RF-AQIA01007589.1-iglv:0.0101422
,
V255RF-JYKQ01126589.1-iglv:0.0101422
):0.0143355
,
(
V48RF-AHZZ01099973.1-iglv:0.0151675
,
V105RF-AJFE01020628.1-iglv:0.0151675
):0.00931022
):0.0179942
):0.00145781
):0.00273053
):0.0109185
):0.00226954
):-0.00096425
):-0.00166258
):0.00328563
):0.0543497
):-0.00300211
):0.0191441
):0.0151362
):0.0635168
):0.0814223
):0.0717587
):0.957951
):0.344942
):0.608684
):3.83679
,
(
(
(
(
V179RF-CABD02337341.1-trgv:0.0306801
,
V32RF-AJFE01038665.1-trgv:0.0306801
):0.0378152
,
(
V99RF-ABGA01290201.1-trgv:0.0546341
,
(
V77RF-AQIA01046502.1-trgv:0.0287619
,
(
(
V1RF-AHZZ01030316.1-trgv:0.00493586
,
V75RF-AQIA01046502.1-trgv:0.00493586
):0.0245198
,
(
V2RF-AQIB01018217.1-trgv:0.0228479
,
(
V1RF-JYKQ01003191.1-trgv:0.0150156
,
V0RF-AQIB01018214.1-trgv:0.0150156
):0.00783224
):0.0066078
):-0.000693785
):0.0258722
):0.0138612
):0.0731441
,
(
(
(
V9RF-JABR01052882.1-trgv:0.0201628
,
V1RF-AQIB01018215.1-trgv:0.0201628
):0.0052209
,
(
V76RF-AQIA01046502.1-trgv:-0
,
V2RF-JYKQ01003191.1-trgv:-0
):0.0253837
):0.0573347
,
(
V102RF-ADFV01046571.1-trgv:0.0664258
,
(
(
V2RF-AACZ03050973.1-trgv:0.00994053
,
V33RF-AJFE01038666.1-trgv:0.00994053
):0.046748
,
(
V100RF-ABGA01290201.1-trgv:0.0485931
,
(
(
V101RF-ABGA01290202.1-trgv:0.00493586
,
V161RF-ABGA01132346.1-trgv:0.00493586
):0.0178747
,
(
V177RF-CABD02337338.1-trgv:0.0150156
,
V31RF-AJFE01038664.1-trgv:0.0150156
):0.00779492
):0.0257826
):0.00809541
):0.00973733
):0.0162925
):0.0589209
):5.38044
,
(
(
(
(
(
V45RF-ABGA01091252.1-trbv:0.0131336
,
(
(
V108RF-CABD02352526.1-trbv:-0
,
V137RF-AJFE01070460.1-trbv:-0
):0.00519213
,
V47RF-AACZ03053991.1-trbv:0.00519213
):0.0079415
):0.02347
,
(
(
V148RF-AHZZ01067649.1-trbv:0.0212331
,
V125RF-AQIA01048536.1-trbv:0.0212331
):0.00550829
,
(
V116RF-JYKQ01131104.1-trbv:0.0212331
,
V197RF-AQIB01162321.1-trbv:0.0212331
):0.00550829
):0.00986226
):0.360028
,
(
(
V202RF-AQIB01162321.1-trbv:0.0380344
,
(
V173RF-ABGA01225869.1-trbv:0.0212331
,
(
V54RF-AACZ03053994.1-trbv:0.0212741
,
(
V114RF-CABD02352531.1-trbv:0.0104605
,
V32RF-ADFV01062084.1-trbv:0.0104605
):0.0108137
):-4.09801e-05
):0.0168012
):0.303674
,
(
(
(
V49RF-ABGA01091257.1-trbv:0.01852
,
(
V112RF-CABD02352529.1-trbv:0.00519213
,
(
V51RF-AACZ03053992.1-trbv:-0
,
V130RF-AJFE01070459.1-trbv:-0
):0.00519213
):0.0133278
):0.0170393
,
(
V200RF-AQIB01162321.1-trbv:0.0316883
,
(
V151RF-AHZZ01067649.1-trbv:0.0253644
,
(
V70RF-JABR01092448.1-trbv:0.01852
,
(
V128RF-AQIA01048536.1-trbv:0.00519213
,
V119RF-JYKQ01131107.1-trbv:0.00519213
):0.0133278
):0.00684438
):0.00632395
):0.00387099
):0.302872
,
(
(
(
V80RF-JZKE01196378.1-trbv:0.0912649
,
V114RF-JZKE01294668.1-trbv:0.0912649
):0.0787554
,
(
V147RF-ABDC01455982.1-trbv:0.176291
,
(
(
V9RF-AGCE01061998.1-trbv:0.0868327
,
V11RF-AGCE01062000.1-trbv:0.0868327
):0.0493329
,
(
V19RF-AGCE01062009.1-trbv:0.0938818
,
(
(
V189RF-AQIB01162320.1-trbv:0.0171634
,
(
V156RF-JABR01088213.1-trbv:0.01852
,
(
(
V140RF-AHZZ01067649.1-trbv:0.0104605
,
V116RF-AQIA01048532.1-trbv:0.0104605
):0
,
V108RF-JYKQ01131101.1-trbv:0.0104605
):0.00805952
):-0.00135658
):0.0354519
,
(
V22RF-ADFV01062075.1-trbv:0.035173
,
(
V101RF-CABD02352513.1-trbv:0.0158068
,
V39RF-AACZ03053988.1-trbv:0.0158068
):0.0193662
):0.0174423
):0.0412665
):0.0422838
):0.0401255
):-0.00627089
):0.111246
,
(
(
V15RF-AACZ03053981.1-trbv:-0
,
V172RF-AJFE01070464.1-trbv:-0
):0.228098
,
(
V138RF-ABDC01368601.1-trbv:0.19942
,
(
(
(
V163RF-AQIB01162312.1-trbv:0.0527295
,
(
(
V180RF-AHZZ01067655.1-trbv:-0
,
V35RF-JYKQ01029809.1-trbv:-0
):0.0438246
,
(
V179RF-AHZZ01067655.1-trbv:0.0104605
,
V90RF-AQIA01048526.1-trbv:0.0104605
):0.0333641
):0.00890493
):0.0534795
,
(
(
V178RF-JABR01088216.1-trbv:0.0452436
,
(
V160RF-AQIB01162312.1-trbv:0.0239873
,
(
(
V185RF-AHZZ01067656.1-trbv:0.0104605
,
V32RF-JYKQ01029809.1-trbv:0.0104605
):0.00534636
,
V87RF-AQIA01048526.1-trbv:0.0158068
):0.00818047
):0.0212563
):0.0592195
,
(
(
V218RF-ABGA01277809.1-trbv:0.0359514
,
(
V76RF-CABD02352488.1-trbv:0.0158068
,
(
V13RF-AACZ03053977.1-trbv:-0
,
V171RF-AJFE01070464.1-trbv:-0
):0.0158068
):0.0201446
):0.0340299
,
(
V222RF-ABGA01277815.1-trbv:0.0767205
,
(
(
V79RF-CABD02352493.1-trbv:0.035173
,
(
V10RF-AACZ03053976.1-trbv:0.00519213
,
V173RF-AJFE01070465.1-trbv:0.00519213
):0.0299809
):0.0354063
,
(
V220RF-ABGA01277810.1-trbv:0.0714742
,
(
V10RF-ADFV01062071.1-trbv:0.0685665
,
(
V182RF-JABR01088216.1-trbv:0.0633211
,
(
V219RF-ABGA01277810.1-trbv:0.0537875
,
(
V13RF-ADFV01062071.1-trbv:0.0514095
,
(
V8RF-ADFV01062069.1-trbv:0.0325062
,
(
V75RF-CABD02352482.1-trbv:0.0212331
,
(
V7RF-AACZ03053974.1-trbv:-0
,
V40RF-AJFE01039608.1-trbv:-0
):0.0212331
):0.011273
):0.0189033
):0.00237805
):0.00953361
):0.00524541
):0.00290764
):-0.000894882
):0.00614122
):-0.00673925
):0.0344819
):0.00174591
):0.0291397
,
(
(
(
V107RF-ABGA01301083.1-trbv:0.0477583
,
(
V26RF-AACZ03053983.1-trbv:0.0158068
,
V155RF-AJFE01070463.1-trbv:0.0158068
):0.0319515
):0.0503595
,
(
(
V176RF-AQIB01162318.1-trbv:0.0481725
,
(
V95RF-JYKQ01131092.1-trbv:0.046708
,
(
V167RF-AHZZ01067652.1-trbv:0.0267414
,
V103RF-AQIA01048530.1-trbv:0.0267414
):0.0199666
):0.00146443
):0.0383557
,
(
(
V164RF-JABR01088214.1-trbv:0.0470683
,
(
V185RF-AQIB01162320.1-trbv:0.0316832
,
(
V112RF-AQIA01048532.1-trbv:0.0302752
,
(
V158RF-AHZZ01067651.1-trbv:0.0161471
,
V103RF-JYKQ01131096.1-trbv:0.0161471
):0.014128
):0.00140807
):0.0153851
):0.0419624
,
(
(
V154RF-AHZZ01067651.1-trbv:-0
,
V98RF-JYKQ01131093.1-trbv:-0
):0.0727498
,
(
V95RF-CABD02352510.1-trbv:0.0965147
,
(
V101RF-JYKQ01131094.1-trbv:0.0632065
,
(
V107RF-AQIA01048530.1-trbv:0.0645271
,
(
V109RF-ABGA01301086.1-trbv:0.0556056
,
(
V172RF-ABGA01223433.1-trbv:0.0409068
,
(
V171RF-JABR01088215.1-trbv:0.0323978
,
(
V152RF-AJFE01070463.1-trbv:0.01852
,
(
V88RF-CABD02352501.1-trbv:0.0158068
,
V23RF-AACZ03053983.1-trbv:0.0158068
):0.00271316
):0.0138779
):0.00850894
):0.0146988
):0.00892152
):-0.00132061
):0.0333082
):-0.0237649
):0.0162809
):-0.00250252
):0.0115896
):0.0210671
,
(
V13RF-AGCE01062002.1-trbv:0.108838
,
(
(
V0RF-AGCE01061995.1-trbv:0.0437792
,
V4RF-AGCE01061995.1-trbv:0.0437792
):0.0397758
,
(
(
V34RF-AACZ03053988.1-trbv:-0
,
V164RF-AJFE01070463.1-trbv:-0
):0.0639877
,
(
V172RF-AQIB01162317.1-trbv:0.0309998
,
(
V99RF-AQIA01048530.1-trbv:0.01852
,
(
V161RF-AHZZ01067652.1-trbv:0.00519213
,
V88RF-JYKQ01131090.1-trbv:0.00519213
):0.0133278
):0.0124798
):0.0329879
):0.0195673
):0.0252835
):0.0103464
):0.0161638
):0.0640713
):0.0286776
):0.0531688
):0.0571651
):0.00327694
):0.054923
):1.65046
,
(
(
(
V118RF-CABD02377005.1-trbv:0.0161471
,
(
V59RF-AACZ03067000.1-trbv:-0
,
V84RF-AJFE01104359.1-trbv:-0
):0.0161471
):0.102843
,
(
(
V50RF-ABGA01091260.1-trbv:0.0144702
,
(
V52RF-AACZ03053992.1-trbv:0.00782629
,
(
V31RF-ADFV01062082.1-trbv:0.00519213
,
V131RF-AJFE01070459.1-trbv:0.00519213
):0.00263416
):0.00664393
):0.0323571
,
(
V129RF-AQIA01048536.1-trbv:0.0198766
,
(
V201RF-AQIB01162321.1-trbv:0.00782629
,
(
V137RF-AHZZ01067648.1-trbv:0.00519213
,
V71RF-JABR01092448.1-trbv:0.00519213
):0.00263416
):0.0120503
):0.0269508
):0.0721626
):0.31817
,
(
V0RF-JZKE01005121.1-trbv:0.155637
,
(
(
V73RF-JABR01092448.1-trbv:0.0266254
,
(
V203RF-AQIB01162321.1-trbv:0.0140273
,
(
V122RF-JYKQ01131110.1-trbv:0.00758872
,
(
V135RF-AHZZ01067647.1-trbv:0.00503527
,
V131RF-AQIA01048536.1-trbv:0.00503527
):0.00255345
):0.00643862
):0.0125981
):0.0191945
,
(
V33RF-ADFV01062084.1-trbv:0.0240078
,
(
(
V115RF-CABD02352532.1-trbv:0.0104605
,
V55RF-AACZ03053994.1-trbv:0.0104605
):0
,
V134RF-AJFE01070459.1-trbv:0.0104605
):0.0135473
):0.0218121
):0.109817
):0.281523
):1.65046
):2.30262
,
(
(
(
(
V83RF-JABR01196792.1-trbv:0.0828245
,
(
(
V60RF-AACZ03067007.1-trbv:-0
,
V85RF-AJFE01104369.1-trbv:-0
):0.0414318
,
(
V51RF-ABGA01091263.1-trbv:0.0345112
,
(
(
V132RF-AQIA01048536.1-trbv:-0
,
V204RF-AQIB01162321.1-trbv:-0
):0.0154805
,
V123RF-JYKQ01131111.1-trbv:0.0154805
):0.0190306
):0.00692062
):0.0413927
):0.968987
,
(
(
(
V124RF-JZKE01294690.1-trbv:0.129069
,
(
V154RF-AQIB01162311.1-trbv:0.0774888
,
(
V5RF-ADFV01062069.1-trbv:0.0667222
,
(
(
V177RF-AHZZ01067655.1-trbv:0.0201628
,
V161RF-AQIB01162312.1-trbv:0.0201628
):0.0339321
,
(
V11RF-ADFV01062071.1-trbv:0.0496948
,
(
(
V183RF-AHZZ01067656.1-trbv:0.0158068
,
V84RF-AQIA01048525.1-trbv:0.0158068
):0.0258659
,
(
V1RF-AGCE01061995.1-trbv:0.0380565
,
(
V217RF-ABGA01277809.1-trbv:0.0323337
,
(
(
V77RF-CABD02352491.1-trbv:-0
,
V11RF-AACZ03053977.1-trbv:-0
):0
,
V169RF-AJFE01070464.1-trbv:-0
):0.0323337
):0.00572273
):0.00361627
):0.0080221
):0.00440006
):0.0126273
):0.0107666
):0.0515806
):0.195975
,
(
V125RF-JZKE01294692.1-trbv:0.135167
,
(
(
V162RF-AQIB01162312.1-trbv:0.0632451
,
(
(
V9RF-AACZ03053975.1-trbv:-0
,
V41RF-AJFE01039609.1-trbv:-0
):0.0288587
,
(
V78RF-CABD02352492.1-trbv:0.00519213
,
(
V12RF-AACZ03053977.1-trbv:-0
,
V170RF-AJFE01070464.1-trbv:-0
):0.00519213
):0.0236666
):0.0343864
):0.0420726
,
(
(
V73RF-CABD02352480.1-trbv:0.0104605
,
V38RF-AJFE01039607.1-trbv:0.0104605
):0.0466872
,
(
V85RF-AQIA01048525.1-trbv:0.01852
,
(
V184RF-AHZZ01067656.1-trbv:0.00519213
,
V158RF-AQIB01162312.1-trbv:0.00519213
):0.0133278
):0.0386277
):0.0481701
):0.0298497
):0.189877
):0.345118
,
(
(
(
V18RF-AGCE01062008.1-trbv:0.109485
,
V121RF-JZKE01294669.1-trbv:0.109485
):0.164163
,
(
(
V6RF-AACZ03053974.1-trbv:-0
,
V39RF-AJFE01039607.1-trbv:-0
):0.165929
,
(
V36RF-AACZ03053988.1-trbv:-0
,
V166RF-AJFE01070463.1-trbv:-0
):0.165929
):0.107719
):0.272227
,
(
V107RF-CABD02352525.1-trbv:0.495752
,
(
(
V129RF-ABDC01281097.1-trbv:0.133658
,
(
V4RF-AACZ03053974.1-trbv:0.0103522
,
V37RF-AJFE01039607.1-trbv:0.0103522
):0.123306
):0.288924
,
(
(
V102RF-CABD02352514.1-trbv:-0
,
V23RF-ADFV01062075.1-trbv:-0
):0.294934
,
(
(
V20RF-AGCE01062009.1-trbv:0.0822845
,
(
V110RF-JYKQ01131102.1-trbv:0.0484172
,
(
V38RF-ABGA01091248.1-trbv:0.0419019
,
(
(
V41RF-AACZ03053989.1-trbv:-0
,
V145RF-AJFE01070462.1-trbv:-0
):0.00774547
,
(
V103RF-CABD02352514.1-trbv:0.00513877
,
V104RF-CABD02352515.1-trbv:0.00513877
):0.0026067
):0.0341564
):0.00651528
):0.0338673
):0.196273
,
(
(
(
(
(
V181RF-AHZZ01067655.1-trbv:-0
,
V91RF-AQIA01048527.1-trbv:-0
):0
,
V36RF-JYKQ01029809.1-trbv:-0
):0.078122
,
(
V80RF-CABD02352494.1-trbv:0.0523127
,
(
V216RF-ABGA01277808.1-trbv:0.0376037
,
V14RF-AACZ03053979.1-trbv:0.0376037
):0.0147089
):0.0258093
):0.0314638
,
(
(
V82RF-CABD02352499.1-trbv:0.0129971
,
(
V16RF-AACZ03053981.1-trbv:0.00513877
,
V146RF-AJFE01070463.1-trbv:0.00513877
):0.0078583
):0.0830382
,
(
V221RF-JABR01184607.1-trbv:0.0545469
,
(
V165RF-AQIB01162313.1-trbv:0.0323989
,
(
V37RF-JYKQ01029811.1-trbv:0.0320311
,
(
V170RF-AHZZ01067653.1-trbv:0.0264584
,
V92RF-AQIA01048527.1-trbv:0.0264584
):0.00557268
):0.000367891
):0.0221479
):0.0414884
):0.0135505
):0.0856288
,
(
V138RF-AHZZ01067649.1-trbv:0.180527
,
(
(
(
V110RF-ABGA01301086.1-trbv:0.0404544
,
(
V35RF-AACZ03053988.1-trbv:0.00513877
,
V165RF-AJFE01070463.1-trbv:0.00513877
):0.0353156
):0.0603358
,
(
(
V0RF-JABR01013263.1-trbv:0.0617574
,
(
V186RF-AQIB01162320.1-trbv:0.0265195
,
(
V104RF-JYKQ01131098.1-trbv:0.0129971
,
(
V159RF-AHZZ01067651.1-trbv:0.0103522
,
V113RF-AQIA01048532.1-trbv:0.0103522
):0.0026449
):0.0135225
):0.0352379
):0.00668875
,
(
(
(
V96RF-CABD02352511.1-trbv:0.00513877
,
V162RF-AJFE01070463.1-trbv:0.00513877
):0.0185954
,
(
V29RF-AACZ03053986.1-trbv:0.0103522
,
V159RF-AJFE01070463.1-trbv:0.0103522
):0.0133821
):0.0419302
,
(
(
V152RF-AHZZ01067651.1-trbv:0.0210101
,
V105RF-AQIA01048530.1-trbv:0.0210101
):0.0281761
,
(
V168RF-AHZZ01067652.1-trbv:0.0264584
,
V104RF-AQIA01048530.1-trbv:0.0264584
):0.0227278
):0.0164782
):0.00278177
):0.032344
):0.00860459
,
(
(
V68RF-ABGA01129113.1-trbv:0.0490951
,
(
(
V89RF-CABD02352502.1-trbv:-0
,
V24RF-AACZ03053983.1-trbv:-0
):0
,
V153RF-AJFE01070463.1-trbv:-0
):0.0490951
):0.0543315
,
(
(
V160RF-JABR01088214.1-trbv:0.0594871
,
(
V104RF-ABGA01301078.1-trbv:0.0565407
,
(
(
V108RF-AQIA01048531.1-trbv:0.015642
,
V99RF-JYKQ01131094.1-trbv:0.015642
):0.0306253
,
(
(
V162RF-AHZZ01067652.1-trbv:0.0210101
,
V100RF-AQIA01048530.1-trbv:0.0210101
):0
,
V89RF-JYKQ01131090.1-trbv:0.0210101
):0.0252572
):0.0102734
):0.00294641
):0.0315982
,
(
V17RF-ADFV01062075.1-trbv:0.0732665
,
(
V175RF-AQIB01162317.1-trbv:0.0264995
,
(
V165RF-AHZZ01067652.1-trbv:0.0210101
,
V92RF-JYKQ01131090.1-trbv:0.0210101
):0.00548942
):0.046767
):0.0178188
):0.0123413
):0.00596824
):0.0711321
):0.0146877
):0.0833431
):0.0163759
):0.127648
):0.0731698
):0.050123
):0.124288
):0.381649
):1.22797
,
(
V119RF-CABD02377030.1-trbv:1.16287
,
(
(
V42RF-ABGA01091249.1-trbv:0.0212331
,
V44RF-AACZ03053991.1-trbv:0.0212331
):0.772879
,
(
V80RF-AQIA01048525.1-trbv:0.686326
,
(
(
(
V159RF-ABDC01560090.1-trbv:0.141058
,
(
V116RF-CABD02377004.1-trbv:0.0490951
,
V198RF-AQIB01162321.1-trbv:0.0490951
):0.0919627
):0.202257
,
(
(
V45RF-AACZ03053991.1-trbv:-0
,
V143RF-AJFE01070461.1-trbv:-0
):0.343756
,
(
V152RF-ABDC01473376.1-trbv:0.238443
,
(
(
V118RF-JYKQ01131105.1-trbv:0.0262833
,
(
V69RF-JABR01092448.1-trbv:0.015642
,
V199RF-AQIB01162321.1-trbv:0.015642
):0.0106413
):0.0348143
,
(
V48RF-ABGA01091257.1-trbv:0.0223721
,
(
V111RF-CABD02352526.1-trbv:0.0129971
,
(
V50RF-AACZ03053992.1-trbv:0.00513877
,
V140RF-AJFE01070460.1-trbv:0.00513877
):0.0078583
):0.00937507
):0.0387254
):0.177345
):0.105313
):-0.000441432
):0.218679
,
(
(
(
V100RF-CABD02352512.1-trbv:0.0104605
,
(
V38RF-AACZ03053988.1-trbv:-0
,
V168RF-AJFE01070463.1-trbv:-0
):0.0104605
):0.316798
,
(
(
(
V18RF-AACZ03053981.1-trbv:0.01852
,
(
V213RF-ABGA01277802.1-trbv:0.0158068
,
V84RF-CABD02352499.1-trbv:0.0158068
):0.00271316
):0.021188
,
(
V39RF-JYKQ01029811.1-trbv:0.0242404
,
(
V172RF-AHZZ01067653.1-trbv:0.0161471
,
V94RF-AQIA01048528.1-trbv:0.0161471
):0.0080933
):0.0154676
):0.224817
,
(
V165RF-JABR01088215.1-trbv:0.164334
,
(
V18RF-ADFV01062075.1-trbv:0.10672
,
(
V174RF-AQIB01162317.1-trbv:0.120194
,
(
(
V19RF-ADFV01062075.1-trbv:0.0482418
,
(
V25RF-AACZ03053983.1-trbv:0.01852
,
(
V90RF-CABD02352503.1-trbv:0.00519213
,
V154RF-AJFE01070463.1-trbv:0.00519213
):0.0133278
):0.0297218
):0.0357556
,
(
V154RF-JABR01088213.1-trbv:0.0885223
,
(
(
V94RF-CABD02352509.1-trbv:0.0323337
,
V160RF-AJFE01070463.1-trbv:0.0323337
):0.0407641
,
(
V106RF-AQIA01048530.1-trbv:0.0654046
,
(
(
(
V157RF-AHZZ01067651.1-trbv:0.00519213
,
V111RF-AQIA01048532.1-trbv:0.00519213
):0.0229579
,
(
V100RF-JYKQ01131094.1-trbv:0.0212331
,
(
V102RF-JYKQ01131095.1-trbv:0.0104605
,
V184RF-AQIB01162320.1-trbv:0.0104605
):0.0107727
):0.00691687
):0.0119975
,
(
V25RF-ADFV01062076.1-trbv:0.0361368
,
(
V91RF-CABD02352508.1-trbv:0.0250252
,
(
V28RF-AACZ03053984.1-trbv:0.0138119
,
(
V163RF-AJFE01070463.1-trbv:0.00916288
,
(
V33RF-AACZ03053988.1-trbv:0.00782629
,
(
V108RF-ABGA01301086.1-trbv:0.00519213
,
V157RF-AJFE01070463.1-trbv:0.00519213
):0.00263416
):0.00133659
):0.00464904
):0.0112133
):0.0111116
):0.0040107
):0.0252571
):0.0076932
):0.0154245
):-0.00452492
):0.0361969
):-0.0134744
):0.0576143
):0.100191
):0.0627333
):0.185384
,
(
(
V22RF-AGCE01062009.1-trbv:0.0989994
,
(
V142RF-AJFE01070461.1-trbv:0.0156811
,
(
V105RF-CABD02352520.1-trbv:0.0103522
,
V43RF-AACZ03053991.1-trbv:0.0103522
):0.00532895
):0.0833183
):0.284027
,
(
(
V22RF-AACZ03053983.1-trbv:0.0826496
,
(
V20RF-AACZ03053981.1-trbv:0.00513877
,
V149RF-AJFE01070463.1-trbv:0.00513877
):0.0775109
):0.20194
,
(
V32RF-AACZ03053988.1-trbv:0.171612
,
(
(
V114RF-AQIA01048532.1-trbv:0.0103522
,
V106RF-JYKQ01131101.1-trbv:0.0103522
):0.0935828
,
(
V20RF-ADFV01062075.1-trbv:0.0543479
,
(
V208RF-ABGA01259417.1-trbv:0.0390945
,
(
(
V98RF-CABD02352511.1-trbv:-0
,
V99RF-CABD02352512.1-trbv:-0
):0.0237342
,
(
V37RF-AACZ03053988.1-trbv:0.00513877
,
V167RF-AJFE01070463.1-trbv:0.00513877
):0.0185954
):0.0153603
):0.0152534
):0.049587
):0.0676769
):0.112977
):0.0984367
):0.129616
):0.0493516
):0.124333
):0.107786
):0.368757
):1.22797
):1.76752
,
(
(
V163RF-AQIA01064165.1-trav:0.888085
,
(
(
(
V171RF-JYKQ01026663.1-trav:0.0826496
,
(
V20RF-CABD02105611.1-trdv:0.0376037
,
V96RF-AACZ03097622.1-trdv:0.0376037
):0.0450459
):0.108844
,
(
V106RF-ABDC01497734.1-trdv:0.156068
,
V48RF-JZKE01143874.1-trdv:0.156068
):0.0354262
):0.172821
,
(
(
V52RF-JZKE01143891.1-trav:0.128106
,
(
V96RF-AGCE01026527.1-trdv:0.091367
,
(
V131RF-ABGA01386446.1-trdv:0.0640902
,
(
(
V16RF-CABD02105598.1-trdv:0.0207916
,
(
V92RF-AACZ03097619.1-trdv:-0
,
V77RF-AJFE01069976.1-trdv:-0
):0.0207916
):0.0279421
,
(
V39RF-AHZZ01098200.1-trav:0.0316513
,
(
V155RF-AQIA01064149.1-trav:0.0261813
,
V220RF-AQIB01128643.1-trav:0.0261813
):0.00547009
):0.0170824
):0.0153565
):0.0272767
):0.0367386
):0.173308
,
(
(
(
V210RF-AQIB01128637.1-trav:0.0369554
,
(
(
V185RF-JABR01098590.1-trav:0.0238154
,
(
V4RF-AHZZ01035404.1-trav:0.0154805
,
V125RF-JYKQ01135388.1-trav:0.0154805
):0.0083349
):-0.000109678
,
(
V99RF-ADFV01192049.1-trav:0.018326
,
(
V67RF-AACZ03095317.1-trav:0.00511263
,
(
(
V238RF-ABGA01321070.1-trav:-0
,
V29RF-CABD02105626.1-trav:-0
):0
,
V122RF-AJFE01024276.1-trav:-0
):0.00511263
):0.0132134
):0.00537974
):0.0132496
):0.022922
,
(
V37RF-JZKE01143868.1-trav:0.0626247
,
(
V98RF-ADFV01192049.1-trav:0.0383272
,
(
V169RF-AQIA01064166.1-trdv:0.027841
,
(
V186RF-JABR01098592.1-trdv:0.0292236
,
(
V239RF-ABGA01321072.1-trdv:0.015642
,
V28RF-CABD02105626.1-trdv:0.015642
):0.0135817
):-0.00138263
):0.0104862
):0.0242975
):-0.00274733
):0.180899
,
(
(
(
V231RF-AQIB01128644.1-trav:0.0224328
,
(
V69RF-JYKQ01054942.1-trav:0.0129971
,
(
V66RF-AHZZ01107545.1-trav:0.00513877
,
V148RF-AQIA01064146.1-trav:0.00513877
):0.0078583
):0.00943574
):0.0247196
,
(
V76RF-ADFV01192039.1-trav:0.0386132
,
(
V134RF-ABGA01387831.1-trav:0.0331008
,
(
(
V216RF-AACZ03171512.1-trav:-0
,
V71RF-AJFE01069976.1-trav:-0
):0.0181361
,
(
V12RF-CABD02105589.1-trav:0.0154805
,
V86RF-AACZ03097618.1-trav:0.0154805
):0.00265555
):0.0149648
):0.00551236
):0.00853924
):0.0662944
,
(
V67RF-JZKE01143910.1-trav:0.0558541
,
(
(
V53RF-ABDC01379531.1-trav:0.0428411
,
V55RF-JZKE01143895.1-trav:0.0428411
):0.00572393
,
V59RF-JZKE01143896.1-trav:0.048565
):0.00728906
):0.0575928
):0.127329
):0.0606375
):0.0629015
):0.52377
):2.23031
,
(
(
(
V23RF-CABD02105615.1-trav:0.00530225
,
V90RF-ADFV01192042.1-trav:0.00530225
):1.08596
,
(
(
(
V120RF-CABD02105639.1-trdv:0.0101422
,
(
V201RF-AACZ03095321.1-trdv:-0
,
V29RF-AJFE01024273.1-trdv:-0
):0.0101422
):0.837185
,
(
(
(
V160RF-ABGA01113133.1-trav:0.0334144
,
V63RF-ADFV01192035.1-trav:0.0334144
):0.246893
,
(
(
V99RF-AGCE01026530.1-trav:0.0309572
,
(
(
V81RF-AACZ03097613.1-trav:-0
,
V66RF-AJFE01069975.1-trav:-0
):0.01852
,
(
(
V206RF-JABR01098600.1-trav:-0
,
V229RF-AQIB01128644.1-trav:-0
):0.00519213
,
V146RF-AQIA01064146.1-trav:0.00519213
):0.0133278
):0.0124372
):0.170749
,
(
(
V84RF-AACZ03097614.1-trav:-0
,
V69RF-AJFE01069975.1-trav:-0
):0.0549116
,
(
V63RF-JYKQ01054940.1-trav:0.0622596
,
(
V8RF-CABD02105586.1-trav:0.0468108
,
(
V157RF-ABGA01083939.1-trav:0.045521
,
(
V70RF-ADFV01192037.1-trav:0.0323768
,
(
V151RF-ABGA01083934.1-trav:0.0267414
,
V74RF-ADFV01192038.1-trav:0.0267414
):0.00563541
):0.0131441
):0.00128985
):0.0154488
):-0.00734797
):0.146794
):0.0786014
):0.173075
,
(
(
(
V146RF-ABDC01454736.1-trav:0.0844264
,
(
V62RF-JZKE01143903.1-trav:0.0735224
,
(
(
(
(
V67RF-AHZZ01107545.1-trav:-0
,
V70RF-JYKQ01054942.1-trav:-0
):0.00524662
,
V149RF-AQIA01064146.1-trav:0.00524662
):0
,
V232RF-AQIB01128644.1-trav:0.00524662
):0.0398078
,
(
V77RF-ADFV01192039.1-trav:0.0312722
,
(
V135RF-ABGA01387833.1-trav:0.0242458
,
(
V13RF-CABD02105590.1-trav:0.00524662
,
(
V87RF-AACZ03097618.1-trav:-0
,
V72RF-AJFE01069976.1-trav:-0
):0.00524662
):0.0189992
):0.00702643
):0.0137822
):0.028468
):0.010904
):0.0725824
,
(
V78RF-JZKE01143916.1-trav:0.123035
,
(
(
V139RF-AQIA01064138.1-trav:0.0159752
,
(
V60RF-JYKQ01054940.1-trav:-0
,
V225RF-AQIB01128644.1-trav:-0
):0.0159752
):0.0192406
,
(
V216RF-JABR01098604.1-trav:0.0450979
,
(
(
V67RF-ADFV01192035.1-trav:0.00790882
,
(
V154RF-ABGA01083939.1-trav:0.00524662
,
V5RF-CABD02105579.1-trav:0.00524662
):0.00266221
):0.0122119
,
(
V78RF-AACZ03097613.1-trav:0.00524662
,
V63RF-AJFE01069975.1-trav:0.00524662
):0.0148741
):0.0249772
):-0.00988215
):0.0878192
):0.0339739
):0.181968
,
(
V50RF-JZKE01143890.1-trav:0.223124
,
(
V115RF-ABDC01533415.1-trav:0.117099
,
(
V95RF-AGCE01026527.1-trav:0.0486417
,
(
V81RF-ADFV01192039.1-trav:0.0433543
,
(
V219RF-AQIB01128643.1-trav:0.0330913
,
(
V130RF-ABGA01386446.1-trav:0.0273261
,
V200RF-JABR01098598.1-trav:0.0273261
):0.00576521
):0.010263
):0.00528737
):0.0684577
):0.106024
):0.115853
):0.114405
):0.393945
):0.199809
,
(
(
V147RF-AHZZ01067649.1-trbv:0.0376037
,
V28RF-ADFV01062079.1-trbv:0.0376037
):0.917317
,
(
(
V221RF-AHZZ01093949.1-trav:0.51148
,
V63RF-AACZ03095312.1-trav:0.51148
):0.325314
,
(
V46RF-JZKE01143873.1-trdv:0.772276
,
(
(
V94RF-AGCE01026527.1-trav:0.396685
,
(
V76RF-JZKE01143916.1-trav:0.140592
,
(
V158RF-ABGA01113129.1-trav:0.0247799
,
(
V65RF-ADFV01192035.1-trav:0.0163229
,
(
(
V76RF-AACZ03097613.1-trav:-0
,
V178RF-AACZ03171395.1-trav:-0
):0
,
V60RF-AJFE01069975.1-trav:-0
):0.0163229
):0.00845706
):0.115812
):0.256094
):0.295501
,
(
(
(
V62RF-JYKQ01054940.1-trav:0.00758872
,
(
V91RF-AHZZ01198216.1-trav:0.00503527
,
(
V211RF-JABR01098603.1-trav:-0
,
V141RF-AQIA01064144.1-trav:-0
):0.00503527
):0.00255345
):0.0236957
,
(
V69RF-ADFV01192037.1-trav:0.0177464
,
(
V156RF-ABGA01083939.1-trav:0.0135611
,
(
V7RF-CABD02105584.1-trav:0.00535908
,
(
V80RF-AACZ03097613.1-trav:-0
,
V65RF-AJFE01069975.1-trav:-0
):0.00535908
):0.00820203
):0.0041853
):0.013538
):0.585178
,
(
(
V63RF-JZKE01143910.1-trav:0.110236
,
(
(
V226RF-AQIB01128644.1-trav:0.0270945
,
(
(
(
V90RF-AHZZ01198214.1-trav:-0
,
V140RF-AQIA01064138.1-trav:-0
):0.010571
,
V61RF-JYKQ01054940.1-trav:0.010571
):0.00540413
,
V217RF-JABR01098604.1-trav:0.0159752
):0.0111193
):0.00794594
,
(
V68RF-ADFV01192037.1-trav:0.0210005
,
(
V64RF-AJFE01069975.1-trav:0.00923993
,
(
V6RF-CABD02105581.1-trav:0.00790882
,
(
V155RF-ABGA01083939.1-trav:0.00524662
,
V79RF-AACZ03097613.1-trav:0.00524662
):0.00266221
):0.0013311
):0.0117605
):0.01404
):0.0751958
):0.417215
,
(
(
(
V100RF-ADFV01192050.1-trav:0.0262484
,
(
(
V68RF-AACZ03095319.1-trav:0.00535908
,
V123RF-AJFE01024276.1-trav:0.00535908
):0.0138114
,
(
V237RF-ABGA01321068.1-trav:0.0107994
,
V30RF-CABD02105628.1-trav:0.0107994
):0.00837116
):0.00707786
):0.0172484
,
(
V99RF-JABR01039937.1-trav:0.0319678
,
(
V206RF-AQIB01128636.1-trav:0.0191273
,
(
V5RF-AHZZ01035404.1-trav:0.00535908
,
(
V171RF-AQIA01064166.1-trav:-0
,
V126RF-JYKQ01135389.1-trav:-0
):0.00535908
):0.0137682
):0.0128405
):0.011529
):0.44654
,
(
(
V220RF-AHZZ01093946.1-trav:0.0480479
,
(
(
V65RF-AACZ03095314.1-trav:-0
,
V121RF-AJFE01024276.1-trav:-0
):0.00535908
,
V215RF-AACZ03171149.1-trav:0.00535908
):0.0426889
):0.0781931
,
(
V116RF-ABDC01542818.1-trav:0.0452661
,
V38RF-JZKE01143869.1-trav:0.0452661
):0.080975
):0.363796
):0.0374147
):0.0890104
):0.075724
):0.0800903
):0.0645177
):0.118127
):0.0922148
):0.0441266
):1.41808
,
(
(
(
V53RF-JZKE01143893.1-trav:0.130363
,
(
V80RF-ADFV01192039.1-trav:0.0548376
,
(
(
(
V129RF-ABGA01386446.1-trav:-0
,
V15RF-CABD02105596.1-trav:-0
):0.00535908
,
(
V90RF-AACZ03097619.1-trav:-0
,
V75RF-AJFE01069976.1-trav:-0
):0.00535908
):0.0284662
,
(
V199RF-JABR01098598.1-trav:0.0283851
,
(
V236RF-AQIB01128644.1-trav:0.014942
,
(
V153RF-AQIA01064148.1-trav:0.0135611
,
(
V37RF-AHZZ01098200.1-trav:0.00535908
,
V73RF-JYKQ01054953.1-trav:0.00535908
):0.00820203
):0.00138088
):0.0134431
):0.00544023
):0.0210123
):0.0755249
):0.445346
,
(
V90RF-AJFE01010527.1-trav:0.479051
,
(
(
V18RF-CABD02105602.1-trav:0.0319889
,
V88RF-AGCE01026522.1-trav:0.0319889
):0.434008
,
(
(
(
(
V17RF-CABD02105602.1-trav:-0
,
V78RF-AJFE01069977.1-trav:-0
):0.00535908
,
V93RF-AACZ03097619.1-trav:0.00535908
):0.0109638
,
(
V156RF-AQIA01064151.1-trav:-0
,
V217RF-AQIB01128642.1-trav:-0
):0.0163229
):0.324949
,
(
V215RF-JABR01098604.1-trav:0.046808
,
(
V66RF-ADFV01192035.1-trav:0.0247799
,
(
V77RF-AACZ03097613.1-trav:0.00535908
,
V61RF-AJFE01069975.1-trav:0.00535908
):0.0194208
):0.0220281
):0.294463
):0.124726
):0.0130537
):0.0966578
):0.0264924
,
(
(
(
V57RF-ABDC01388284.1-trav:0.130772
,
(
(
V54RF-ABDC01379531.1-trav:-0
,
V104RF-ABDC01491653.1-trav:-0
):0.0791211
,
(
V56RF-JZKE01143895.1-trav:0.0359514
,
(
V60RF-JZKE01143896.1-trav:0.0161471
,
V61RF-JZKE01143902.1-trav:0.0161471
):0.0198042
):0.0431697
):0.0516505
):0.0670114
,
(
(
V97RF-AGCE01026529.1-trav:0.086339
,
(
V136RF-ABGA01387833.1-trav:0.0519661
,
(
(
V202RF-JABR01098599.1-trav:0.0207753
,
(
V35RF-AHZZ01098200.1-trav:0.0200895
,
(
V227RF-AQIB01128644.1-trav:0.00790882
,
(
(
V150RF-AQIA01064146.1-trav:-0
,
V233RF-AQIB01128644.1-trav:-0
):0.00524662
,
V71RF-JYKQ01054942.1-trav:0.00524662
):0.00266221
):0.0121807
):0.000685729
):0.0271944
,
(
V78RF-ADFV01192039.1-trav:0.0298583
,
(
(
V14RF-CABD02105592.1-trav:0.010571
,
V88RF-AACZ03097619.1-trav:0.010571
):0.00540413
,
V73RF-AJFE01069976.1-trav:0.0159752
):0.0138832
):0.0181113
):0.00399641
):0.0343729
):0.0871419
,
(
V103RF-AGCE01026531.1-trav:0.151901
,
(
(
V73RF-ADFV01192038.1-trav:0.0316832
,
(
V83RF-AACZ03097614.1-trav:0.0134156
,
(
V10RF-CABD02105588.1-trav:0.00530225
,
V68RF-AJFE01069975.1-trav:0.00530225
):0.00811331
):0.0182677
):0.0455301
,
(
V101RF-AGCE01026530.1-trav:0.0615193
,
(
V204RF-JABR01098600.1-trav:0.0378469
,
(
V65RF-JYKQ01054942.1-trav:0.0191273
,
(
V63RF-AHZZ01107544.1-trav:0.0163229
,
V144RF-AQIA01064146.1-trav:0.0163229
):0.00280443
):0.0187196
):0.0236724
):0.015694
):0.0746874
):0.0215803
):0.0243021
):0.302788
,
(
(
(
V51RF-ABDC01377653.1-trav:0.0693477
,
V75RF-JZKE01143916.1-trav:0.0693477
):0.146899
,
(
V105RF-AGCE01026534.1-trav:0.11605
,
(
(
V3RF-CABD02105570.1-trav:0.0323647
,
(
V159RF-ABGA01113130.1-trav:0.025918
,
(
V64RF-ADFV01192035.1-trav:0.0161471
,
(
V75RF-AACZ03097612.1-trav:0.00530225
,
V59RF-AJFE01069975.1-trav:0.00530225
):0.0108449
):0.00977088
):0.0064467
):0.0151021
,
(
(
V88RF-AHZZ01198213.1-trav:0.00530225
,
V59RF-JYKQ01054933.1-trav:0.00530225
):0.0220458
,
(
V223RF-AQIB01128644.1-trav:0.0161889
,
(
V213RF-JABR01098604.1-trav:0.010684
,
V137RF-AQIA01064137.1-trav:0.010684
):0.00550491
):0.0111592
):0.0201187
):0.0685828
):0.100197
):0.0682383
,
(
(
V70RF-JZKE01143915.1-trav:0.151949
,
(
V100RF-AGCE01026530.1-trav:0.101225
,
(
(
V82RF-AACZ03097614.1-trav:0.00530225
,
V67RF-AJFE01069975.1-trav:0.00530225
):0.0413828
,
(
V152RF-ABGA01083937.1-trav:0.0309122
,
(
V210RF-JABR01098601.1-trav:0.0175338
,
(
(
V62RF-AHZZ01107544.1-trav:0.010684
,
V143RF-AQIA01064146.1-trav:0.010684
):0.00546317
,
V64RF-JYKQ01054942.1-trav:0.0161471
):0.00138667
):0.0133783
):0.0157729
):0.0545399
):0.050724
):0.0527692
,
(
V58RF-JZKE01143896.1-trav:0.174633
,
(
V79RF-ABDC01418428.1-trav:0.161234
,
(
(
V207RF-JABR01098600.1-trav:0.0228743
,
(
V147RF-AQIA01064146.1-trav:0.0132731
,
(
(
V65RF-AHZZ01107544.1-trav:-0
,
V230RF-AQIB01128644.1-trav:-0
):0.00524662
,
V68RF-JYKQ01054942.1-trav:0.00524662
):0.00802648
):0.00960124
):0.0388175
,
(
V150RF-ABGA01083932.1-trav:0.034122
,
(
V75RF-ADFV01192038.1-trav:0.0242458
,
(
V11RF-CABD02105589.1-trav:0.00524662
,
V70RF-AJFE01069976.1-trav:0.00524662
):0.0189992
):0.00987621
):0.0275698
):0.0995425
):0.0133989
):0.0300851
):0.0797669
):0.216086
):0.10163
):1.41808
):0.812233
):0.765178
):0.957593
):1.42736
):0.367932
):0.48743
)
;
