# Supplementary material for: Iterative Variable Gene Discovery from Whole Genome Sequencing with a Bootstrapped Multiresolution Algorithm
Source: Comput Math Methods Med. 2019 Feb 11;2019:3780245. doi: 10.1155/2019/3780245 (PMC6388353; doi:10.1155/2019/3780245)
Supplement: Supplementary Materials — supp_materialsV2.pdf: this is an updated document, which includes new figures requested by the reviewer. sequences_alignments.zip: these are genome sequence files that are relevant for reproducing some of the results. [file 3780245.f1.zip › 3780245.f1/sequences_alignments/bstrp_iteration_0_r.fasta]

>V1RF-AHZZ01030316.1-trgv |(43861, 44177)|2.53814258019|(0.925,0.859,0.817)|1
----SQKSSNLEGRTKSVTRPTGSSAEITCDLPEV-----S-SFYIHWYLHQEGKAPQRL
LYYDSSN--SRV-VLESGISPGKYDTYGSTRRRNLRLI------LRNLIENDSGVYYCAN
WD-----
>V4RF-AHZZ01035404.1-trav |(11684, 11986)|2.66253707334|(0.938,0.864,0.891)|1
----SGMAQTVTQSQPEMSVQEAETVTLSCTYDTS-----DSDYYLFWYKQPPSRQMILI
IRQEAYK--QQN--ATENRFSVNFQKA----AKSFSLK------ISDSQLGDAAMYFCAY
RS-----
>V5RF-AHZZ01035404.1-trav |(35215, 35503)|2.45488723927|(0.807,0.781,0.916)|1
----LSGELKVGQNPLFLSTQEGKNYTIYCNYSTA-------SNRLYWYRQDPGKSLESL
FVLLSNG--AV---KQEGRLMASLDTK----ARLSSLH------ITAALQDLSATYFCAV
-------
>V8RF-AHZZ01040804.1-igkv |(44403, 44694)|2.68775934009|(0.941,0.823,0.986)|1
--------IVLTQSPTSMAVSQGERVTISCTASSSVS-----TSYLHWYQQKPGFPPRLL
VY----R--TS---SLASGVPARFSGSGS--GTSYTLT------ISSMEAEDAANYYCQQ
GNSIP--
>V12RF-AHZZ01064615.1-ighv |(3396, 3696)|2.87091054075|(0.945,0.967,0.962)|1
----VQCEVQLVE-SGGGLVQPGGSLRLSCAASGFTF-S---SYAMQWVHQTPGKGLEWV
SAIGP--G-GDT--YYADAVKGRFTISRDNAKNSLYLQ------M--NSLRAEAVYYCAR
-------
>V17RF-AHZZ01069449.1-ighv |(25634, 25949)|2.96180866856|(0.981,0.998,0.984)|1
----VQCEVQLVE-SGGGLVQPGGSLRLSCAASGFTF-S---NYWMNWVRQAPGKGLEWV
GFIKNKADGGTA--AYAESVKGRFTISRDDSKNTLYLQ------MNSLKTEDTAVYYCTR
-------
>V18RF-AHZZ01069451.1-ighv |(7153, 7468)|2.90561393505|(0.990,0.987,0.939)|1
----VQCEVQLVE-SGGGLVQPGRSLRLSCAASGFTF-S---NYYMHWVRQAQGKGLEWV
GLIRNKANSYTT--EYAAAVKGRFTISRDDSKNTLYLQ------MSSLKTEDTAVYYCTT
-------
>V25RF-AHZZ01069456.1-ighv |(9988, 10297)|2.95753206285|(0.987,0.993,0.978)|1
----VQCEVQLVE-SGGGLVQPGGSLRLSCAASGFTF-S---SYGMHWARQAPGKGLEWV
SAINTG--GGST--WYADSVKGRFTISRENAKNTLYLQ------MNSLRAEDTAVYYCAK
-------
>V28RF-AHZZ01091599.1-ighv |(2219, 2528)|2.9489815877|(0.988,0.967,0.996)|1
----VQCEVQLVE-SGGGLSKPGGSLRLSCAASGFTF-S---DYNMDWVRQASGKGLEWV
SSINTG-G-GST--WYADSVKGRFTISRENAKNTLYLQ------MNSLRAEDTAVYYCAR
-------
>V31RF-AHZZ01091603.1-ighv |(4407, 4716)|2.90443530231|(0.954,0.961,0.997)|1
----VLSQVQLQE-SGPGLVKPSETLSLTCAVSGGSI-S---SNYWNWIRQPPGKGLEWI
GRIYGG-S-GST--DYSPSLKSRVTISTDTSKNQLSLK------LSSVTAADTAMYYCAR
-------
>V32RF-AHZZ01097944.1-iglv |(5376, 5682)|2.71796429359|(0.882,0.959,0.902)|1
-----DSETVVTQ-EPSLSVSSGGTVTLTCGLSSG---SVSTSNYPSWYQQTPGQAPRTL
IY----R--TN---TRPSGVPDRFSGSIL--GNKAALT------ITGAQADDESDYYCML
YMGSGI-
>V34RF-AHZZ01097949.1-iglv |(59447, 59759)|2.8042588236|(0.964,0.880,0.991)|1
----SWAEVVFTQ-PHSVSGSPGQTVTISCTRSSG---SID-SKYVQWYQQRPGSAPTTV
IY----E--DN---KRPSGVPDRFSGSIDSSSNSASLT------ISGLNSEDEADYYCQS
ADGSYN-
>V35RF-AHZZ01098200.1-trav |(876, 1169)|2.7261499321|(0.907,0.886,0.939)|1
---VWSQQKEVEQNPGPLSVPEGATASLNCTYSNS-----A-FQNFMWYRQYSRKGPQLL
IYTYSSG--NK----EEGRFTAQVDKS----SKYISLF------IRDSQPSDSATYFCAM
S------
>V37RF-AHZZ01098200.1-trav |(35496, 35783)|2.75704239695|(0.922,0.938,0.900)|1
-----VNSQQGEEDPQTLSIQEGENATMNCSYKT------S-INNLQWYRQDSGRSLVQL
ILICSNE--RE---KNSGRLRVTLDTS----KKSSSLL------ITASRAADTASYFCAT
D------
>V39RF-AHZZ01098200.1-trav |(50539, 50842)|2.41796800026|(0.806,0.808,0.804)|1
----SSMAQKVTQAQTEISVVEKEDVTLDCVYETR-----ENTYYLFWYKQPPSGELVFL
IRRNSFD--EQN--EMNGRYDSNFQKS----TSSFNLT------ITASQVVDSAVYFCAL
NE-----
>V43RF-AHZZ01098942.1-ighv |(3874, 4183)|2.91270067828|(0.979,0.962,0.973)|1
----VLSQVQLQE-SGPGLVKPSETLSLTCAVSGGSF-S---SNYWSWICQPPGKGLEWI
GGIYGS-G-GST--YYNPSLKNRVTISTDTSKNQFSLK------LSSVTAADTAVYYCAR
-------
>V44RF-AHZZ01098950.1-ighv |(183, 495)|2.96838527945|(0.996,0.976,0.998)|1
----VLSQVQLQE-SGPGLVKPSETLSLTCAVSGYSI-S-SG-YYWGWIRQPPGKGLEWI
GYIYGN-S-AST--YYNPSLKSRVTISKDTSKNQFSLK------LSSVTAADTAVYYCAR
-------
>V45RF-AHZZ01099970.1-iglv |(6343, 6653)|2.74896429359|(0.957,0.880,0.937)|1
----SWAEVVFTQ-PHSVSGSPGQTVTISCTRSSG---SID-SKYVQWYQQRPGSAPTTV
IY----N--DD---QRPSGVPDRFSGSIDSSSNSASLT------ISGLKSEDEADYYCQS
ADSSS--
>V48RF-AHZZ01099973.1-iglv |(38400, 38710)|2.8863868029|(0.988,0.947,0.961)|1
----SWAQSVLTQ-PPSVSGAPGQRVTISCTGSSS---NIGAGYYVSWYQQLPGTAPKLL
IY----E--NN---KRPSGVSDRFSGSKS--GTSASLA------ITGLQAEDEADYYCQS
YDSSLS-
>V52RF-AHZZ01104241.1-igkv |(53164, 53464)|2.73157726394|(0.987,0.864,0.946)|1
----TSGEIVLTQSPATLSLSPGERATLSCRASQSV------GSSLAWYQQKPGQAPRLL
IY----G--AS---SRATGIPDRFSGSGS--GTEFTLT------ISSLEPEDFVVYYCQK
YSSSP--
>V53RF-AHZZ01104241.1-igkv |(58624, 58924)|2.90723355494|(0.977,0.956,0.976)|1
----VRCDIQMTQSPSFLSASVGDRVTITCQASQSIS------NDLAWYQQKPGKSPTLL
IY----D--AT---NLHTGVPSRFSGSGS--GADYSLT------ISSLELEDFAAYYCQQ
EYSYP--
>V55RF-AHZZ01104243.1-igkv |(37856, 38148)|2.80824910116|(0.961,0.885,0.988)|1
----SRGDIVMTQSPAFVSVTPGEKVTITCQASEGIS------NYLHWYQQKPDQAPKLF
IQ----Y--AS---QSISGVPSRFTGSGS--GTDFTFT------ISSLEVEDAATYYCQQ
GN-----
>V56RF-AHZZ01104243.1-igkv |(54085, 54379)|2.87352554026|(0.988,0.935,0.964)|1
-----RGDIQMTQSPSSLSASVGDRVTITCRASQSF-------SSLAWYQQKPGKAPKLL
IY----S--AS---SLQSGVPSRFSGSKS--GTDFTLT------ISSLQPEDVASYYCQQ
YYSYP--
>V57RF-AHZZ01104243.1-igkv |(69226, 69518)|2.97456408064|(0.996,0.993,0.986)|1
----AKCDIQMTQSPSSLSASVGDRVTITCRASQTIS------SYLAWYQQKPGKVPKLL
IY----A--AS---SLESGVPSRFSGSGS--GTEFTLT------ISSLQPEDFATYYCQQ
HN-----
>V59RF-AHZZ01104761.1-ighv |(4083, 4398)|2.85972492248|(0.947,0.941,0.975)|1
----VKCEAQLME-SGGGLVQPGGSLRLSCAASGFTF-S---DHYMQWVRQAPGKGLEWV
GLIRNKADGETT--DYAASVKGRVTTSRDDSKSITYLQ------MNNLKTEDTAVYYCAR
-------
>V60RF-AHZZ01104763.1-ighv |(4374, 4683)|2.96208440501|(0.992,0.977,0.994)|1
----VQCEVQLVE-SGGGLAKPGGSLRLSCAASGFTF-S---DYYMDWVRQAPGKALEWV
SGISNT--GGST--WYADSVKGRFTISRENAKNTLYLQ------MSSLRAEDTAVYYCAR
-------
>V61RF-AHZZ01105091.1-igkv |(457, 757)|2.81631623381|(0.957,0.992,0.890)|1
----ARCDIQMNQSPSSLSASVGDTATITCRASQGIS------NNLAWYQQKPGKAPKLL
IY----A--AS---SLESGVPSRFSGSGS--GTEFTLT------ISSLQPEDFAAYYCQQ
YNSLP--
>V62RF-AHZZ01107544.1-trav |(5301, 5591)|2.77953496597|(0.941,0.940,0.904)|1
-----VNGENVEQHPSTLSVQEGDSSVIKCTYSDS-----A-SNYFPWYKQELGKGPQFI
IDIRSNE--HE---KKDQRITVLLNKT----AKHFSLH------ITETQPGDSAVYFCAA
S------
>V63RF-AHZZ01107544.1-trav |(27803, 28091)|2.72912931549|(0.892,0.886,0.986)|1
---VWS-QQKVEQSSGPLSVPEGAIASLNCTYSDS-----G-SQSFFWYRQYSGQSPELL
MSTYSSG--DK----EDGRFTAQLNRA----SQYVSLL------IRDSQLSDSATYLCAV
-------
>V65RF-AHZZ01107544.1-trav |(53747, 54040)|2.47997474155|(0.934,0.895,0.765)|1
----VSRGESVGLHLPTVSVQEGDNSVINCTYSDS-----A-SDYFLWYKQESGKGPQSI
IDIRSNM--AK---RQGQRLTVLLNKT----MKHLSLQ------IAATEPGDSAVYFCAE
N------
>V66RF-AHZZ01107545.1-trav |(4983, 5284)|2.52348487201|(0.909,0.805,0.861)|1
----SGIAQKITQTQPAMFVQEKEAVTLDCTYDTS-----DQNYGLFWYKQPSSGEMIFL
ILQMSYD--KQN--ATEGHYSLNFQKA----RKSVNLV------ISASQVGDSATYFCAM
R------
>V67RF-AHZZ01107545.1-trav |(23299, 23593)|2.71167100508|(0.929,0.881,0.912)|1
----RTRGDSVTQMEGPVTLSERAFLTINCTYTAT-----GY-PSLFWYVQYPGEGPQLL
LKATKT---DEK--GSNKGFEATYRKE----TTSFHLK------KDSVQESDSAVYFCAL
S------
>V69RF-AHZZ01109397.1-igkv |(45, 345)|2.9898400105|(0.998,1.000,0.992)|1
----ARCDIQMTQSPSSLSASVGDRVTITCRASQGIS------SYLNWYQQKPGKAPKLL
IY----D--AT---TLQSGVPSRFSGSGS--GTEFTLT------ISSLQPEDFAVYYCQQ
RNSYP--
>V71RF-AHZZ01109397.1-igkv |(20176, 20476)|2.89266172079|(0.968,0.980,0.947)|1
----ARCDIQMTQSPSSLSASVGDRVTITCQASQGIS------SWLSWYQQKPGKAPKLL
LY----K--AS---GLQSGVPSRFSGSGS--GTEFTLT------ISSLQPEDFATYYCQQ
FSSAL--
>V72RF-AHZZ01109398.1-igkv |(3225, 3525)|2.77535180947|(0.975,0.872,0.970)|1
----TTGEIVMTQSPATLSLSPGERATLSCRASQSVS------SRLAWYQQKPGQAPRLL
IY----D--AS---SRATGIPDRFSGSGS--GTEFTLT------ISSLEPEDVGVYYCQQ
SYSWP--
>V77RF-AHZZ01117753.1-igkv |(3232, 3532)|2.82541085727|(0.996,1.000,0.881)|1
----ARCDIQMTQSPSSLSASVGDRVTITCRASQGIS------TYLNWYQQKPGKAPKLL
IY----A--AS---RLESGVPPRFSGSGS--GTEFTLT------ISSLQPEDFATYYCLQ
YKSDP--
>V78RF-AHZZ01117754.1-igkv |(5922, 6221)|2.84011068476|(0.979,0.942,0.933)|1
----TTGEIVMTQSPATLSLSPGERATLSCRASQSVS------SYLAWYQQKPGQAPRLL
IY----G--AS---SRATGIPDRFSGSGS--GTEFTLT------ISSLEPEDVGVYYCQQ
YNNWN--
>V82RF-AHZZ01129142.1-ighv |(1012, 1321)|2.94232022844|(0.985,0.986,0.972)|1
----VLSQVQLQE-SGPGVVKPSETLSLTCAVSGGSI-S---SYWWGWIRQPPGKGLEWI
GYIYGS--GSST--NYNPSLKSRVTISKDTSKNQFSLK------LSSVTAADTAVYYCAR
-------
>V87RF-AHZZ01176978.1-igkv |(12153, 12453)|2.95243912445|(0.992,0.967,0.996)|1
----ARCDIQMTQSPSSLSASVGDKVTITCHASQGIS------SWLSWYQQKPGKAPKLL
IY----K--AS---SLQSGVPSRFSGSGS--GTDYTLT------ISSLQPEDFATYYCQQ
DSSSP--
>V88RF-AHZZ01198213.1-trav |(10234, 10524)|2.64072634217|(0.869,0.864,0.917)|1
----MSRGEDVEQS-LFLSVREGDISVINCTYTDS-----S-STYLYWYKQEPGAGLQLL
TYILSNM--DL---KRDQRVTVLLNKK----DKHLSLR------IADTQTEDSAIYFCAE
S------
>V90RF-AHZZ01198214.1-trav |(53657, 53950)|2.52353655292|(0.811,0.842,0.966)|1
----GSGKNQVEQSPQSLIILEGKNCTLQCNYTVS-----P-FSNLRWYKQDTGKGPISL
TIMTFSE--NT---KSNGRYTATLDAD----TKQSSLH------ITAAQLSDSASYICVV
S------
>V91RF-AHZZ01198216.1-trav |(1076, 1382)|2.35696850246|(0.919,0.733,0.852)|1
---VWSQQKEVEQDPGPFSVPEGATVTFNCTYSNS-----A-SQSFFWYRQDSRKEPKLL
MSVYSSG--N-----EDGRFTAQLNRA----SQYISLL------IRDSQLSDSATYLCAV
YTQCSP-
>V97RF-AHZZ01040807.1-igkv |(39921, 40221)|2.8282267266|(0.969,0.893,0.991)|-1
----AKCDIQMTQSPTFLSASVGDRVTIACRASQSIH------KGLAWYQQKPGKAPKLL
IS----Y--AS---NLYTGVPSRFSGSGS--GTDFTLT------ISSLQPEDAATYYCFQ
YNSYP--
>V98RF-AHZZ01040808.1-igkv |(17035, 17353)|2.85203899007|(0.977,0.903,0.995)|-1
----ACGDIVMTQSPDSLAVSLGERVTINCKSSQSLLYSSNNKNYLAWYQQKPGQTPKLL
IS----W--AS---TRESGVPNRFSGSGS--GTDFTLT------ISGLQAEDVAVYYCQQ
HYSTP--
>V101RF-AHZZ01042078.1-igkv |(13394, 13694)|2.90781063759|(0.952,0.976,0.987)|-1
----ARCDIQMTQSPSSLSASVGDRVTITCRASQNIY------SNLAWYQQKPGKAPKPL
IY----Y--AS---SLETGVPSRFRGSGS--GTDYTLT------ISSLQPEDIATYYCQQ
YNNSP--
>V105RF-AHZZ01042080.1-igkv |(4422, 4722)|2.87206085876|(0.992,0.916,0.987)|-1
----ARCDIQLTQSPSSLSASVGDRVTISCRTSQNIY------SNLAWYQQKPGKTPKLL
IY----A--AS---SLQSGIPSRFSGSGS--GTDFTLT------ISSLQPEDVATYYCQH
GYGTP--
>V108RF-AHZZ01042083.1-igkv |(18979, 19279)|2.90125569424|(0.954,0.973,0.978)|-1
----ARCDIHMTQSPSSLSASVGDRVTITCRASQGIT------DDLAWYQQKPGETPKLL
IY----E--AS---SLQSGIPSRFSGSGS--GTEFTLT------ISSLQLNDSATYYCQH
YYSYP--
>V111RF-AHZZ01042084.1-igkv |(28167, 28465)|2.89244672519|(0.999,0.943,0.967)|-1
----ARCDIQLTQSPSSLSASVGDRVTITCQASQGIS------NNLAWYQQKPGKVPKLL
IY----K--AS---TLQSGVPSRFSGSGS--GTDFTLT------ISSLQPEDFATYYCQY
GYGI---
>V114RF-AHZZ01042085.1-igkv |(49587, 49887)|2.96969465218|(0.999,0.975,0.998)|-1
----ARCDIQMTQSPSSLSASVGDRVTITCRASQGIT------NDLAWYQQKPGETPKLL
IY----E--AS---SLQSGIPSRFSGSGS--GTDFTLT------ISSLQPEDFATYYCQH
YYSTP--
>V115RF-AHZZ01042091.1-igkv |(7298, 7613)|2.91203470796|(0.995,0.953,0.973)|-1
----TSGDIVMTQTPLSLSVTPGEPASISCRSSQSLLH-SNGNTYLHWYLQKPGQSPQLL
IY----L--VS---NRASGVPDRFSGSGS--GTDFTLK------ISRVEAEDVGVYYCMQ
GIQLP--
>V117RF-AHZZ01042093.1-igkv |(34873, 35173)|2.82365734643|(0.976,0.887,0.993)|-1
----ARCDIQMTQSPSSLSASVGDRVTITCRASQGIN------KELDWYQQKPGKAPTLL
IY----A--AS---SLQTGVSSRFSGSGS--GTDFTLT------ISSLQPEDVATYYCQQ
DYTTP--
>V125RF-AHZZ01042093.1-igkv |(133001, 133301)|2.76923851257|(0.886,0.966,0.971)|-1
----ARCDTQMTQSLSSLFASVGDRVTITCRASQGIN------NELAWYQQKPGKAPTLL
LY----S--GS---SLHTGVPSQFSGSGS--GTDFTLT------ISSLQPEDVATYYCRQ
DYTTP--
>V127RF-AHZZ01042093.1-igkv |(150847, 151147)|2.96849264122|(0.999,0.988,0.983)|-1
----ARCDIQMTQSPSSLSASVGDRVTITCQASQGIS------NNLNWYQQKPGKTPKLL
IY----A--AS---SLQSGIPSRFSGSGS--GTDFTLT------ISSLQPEDFATYYCQQ
RYSAP--
>V129RF-AHZZ01042093.1-igkv |(173599, 173899)|2.91288121229|(0.950,0.992,0.982)|-1
----ARCDIQMTQSPSALSASVGDRVTISCRASQNIY------SGLAWYQQKPGKAPKLL
IY----D--AS---GLQSGIPSQFSGSGS--GTDFTLT------ISSLQPEDSATYYCQH
YYDTP--
>V135RF-AHZZ01067647.1-trbv |(24494, 24801)|2.66438502922|(0.895,0.867,0.906)|-1
-----LVDVKVTQSSRYLIKRTGEKVFLECVQDMD-------HERMFWYRQDPGLGLRLI
YFSYDVK--V----NEKGDIPEGYSVSREK-KERFSLI------LGSASTNQTSMYLCAS
SLSTA--
>V137RF-AHZZ01067648.1-trbv |(3732, 4029)|2.55937208453|(0.868,0.939,0.794)|-1
-----LMEADIYQNPRHRVIGTGKKITLECSQTMG-------HDKMYWYQQDPGMELHLI
HYSYGVN--S----TERGDFSSESTVSRIR-IEHFPLT------LESTSPSHTSQYLCAS
SE-----
>V138RF-AHZZ01067649.1-trbv |(1785, 2085)|2.62021049144|(0.887,0.857,0.880)|-1
-----HAEAGVSQDPRHKITKTGQNVSFKCVPISE-------HNRLYWYRQTLGQGPEFL
TYFQNE---AQQ--DRSGLFSDRFSAERPE-GSISTLM------IQHTEQGDSAVYLCAS
SL-----
>V140RF-AHZZ01067649.1-trbv |(16676, 16973)|2.71750416562|(0.923,0.938,0.869)|-1
-----HMDAGITQSPRHKITETGTPVTLRCHQTEN-------HRYMYWYRQDLGNGLRLI
HYSYGVE--D----TDKVEISDGYSVSRSK-TEDFLLT------LESATRSQTSVYFCAS
SE-----
>V147RF-AHZZ01067649.1-trbv |(69483, 69783)|2.43495558209|(0.869,0.820,0.784)|-1
-----SPGEEVTQTPKHLVKGEGQKAKLYCDPIKG-------HSYVFWYQQVLRKEFKFL
ISFQNKN--VF---DETGMPKERFSAKCPA-NSPCSLE------IQATKLKDSAVYFCAS
SQ-----
>V148RF-AHZZ01067649.1-trbv |(89894, 90191)|2.53316860054|(0.895,0.951,0.765)|-1
-----TVDGGITQSPKYLFRKEGQNVTLSCEQNLN-------HDAMYWYRQDPGQGLRLI
YYSQIVN--D----IQNGDIAEGYSVSRDR-KESFPLT------VTSAQRNPTAFYLCAS
SI-----
>V151RF-AHZZ01067649.1-trbv |(129327, 129625)|2.70978689957|(0.888,0.912,0.915)|-1
-----SMDADVTQTPRNSIAKTGKRIMLECSQTKG-------HDQMYWYRQDPGLGLRLI
FYSFDVE--D----INKGEISDGYSASRQE-QAKFSLS------LESATPNQTALYFCAT
SD-----
>V152RF-AHZZ01067651.1-trbv |(1632, 1932)|2.80193478495|(0.919,0.941,0.947)|-1
-----HTGAGVSQSPRYKVTKRGQDVALRCDPISG-------HDYLYWYQQALGQGPELL
TYFNYE---AQQ--DKSGLPNDRFSADRPE-GSVSTLK------IQRTEQRDSAVYLCAS
SL-----
>V154RF-AHZZ01067651.1-trbv |(13303, 13600)|2.76451845765|(0.946,0.911,0.916)|-1
-----PGNAGVTQTPKFQILKTGQSMTLQCAQDMN-------HNYMSWYRQDPGVGLRLI
HYSVGAG--V----TDKGEVSNGYNVSRLN-TEDFPLS------LESAASSQTSVYFCAS
SY-----
>V157RF-AHZZ01067651.1-trbv |(47891, 48187)|2.79407773254|(0.972,0.885,0.967)|-1
-----PVDAGVTQSPTHLIKTRGQQVTLRCSPISG-------HTSVYWYQQALGQGPQFI
FQYYEKE---ER--ER-GNFPDRFSGRQFP-NYSSELN------VSALLLGDSALYLCAS
SL-----
>V158RF-AHZZ01067651.1-trbv |(55192, 55483)|2.46999264052|(0.905,0.918,0.745)|-1
-------NADVTQTPKFRVLKTGQSMIVQCAQDMK-------HDYMFWYRQDPGMGLRLI
YYSVTAG--I----TTKGEVPNGYNVSRIN-TEDFLLR------LESAALSQTSVYFCAS
SY-----
>V159RF-AHZZ01067651.1-trbv |(59487, 59787)|2.79431523225|(0.909,0.931,0.972)|-1
-----HTGAGVSQSPRYKVIKKGQDVALRCDPISG-------HAALYWYQQALGQGPEFL
TYFNYQ---AQP--DKSGLPNDRFSAERSE-GSVSTLT------IQRTEQQDSAVYLCAS
SL-----
>V161RF-AHZZ01067652.1-trbv |(695, 992)|2.82256213308|(0.981,0.961,0.905)|-1
-----PVNAGVTQTPKFQVLKTGQSMTLQCAQDMN-------HDCMYWYRQDPGMGLRLI
HYSVGEG--S----TDKGEVPDGYNVTRSN-TEDFPLR------LESAAPSQTSVYFCAS
SY-----
>V162RF-AHZZ01067652.1-trbv |(5225, 5525)|2.72636857198|(0.928,0.862,0.957)|-1
-----HTGAGVSQSPRYKVTKRGQDVALRCDPISG-------HDYLYWYQQAPGQGPEFL
TYFQND---AQR--DKSGLPNDRFSAERTE-GSVSTLK------IQRTEQADSAVYLCAS
SL-----
>V165RF-AHZZ01067652.1-trbv |(24517, 24817)|2.74194239438|(0.914,0.935,0.896)|-1
-----HTGAGVSQSPRYKVTKRGQDVALRCDPISG-------HVALYWYQQALGQGPEFL
TYFQND---AQP--DKSGLPSDRFSAERPE-GSVSTLK------IQRTQQGDAAVYLCAS
SL-----
>V167RF-AHZZ01067652.1-trbv |(38310, 38607)|2.54380222029|(0.878,0.896,0.797)|-1
-----LVNAGVTQTPKFQVLKTGQSMTVQCAQDMN-------YNFMYWYRQDPGVGLRLI
HYSGAAG--T----TDKGEVPSGYNVSRLN-TEIFPLR------LESAAPSQTSVYICAS
SY-----
>V168RF-AHZZ01067652.1-trbv |(42887, 43187)|2.52706007976|(0.895,0.932,0.768)|-1
-----HTGARVSQSPRYKVTKRGQDVALRCDPISG-------HDYLYWYQQALGQGPELL
TYFSYE---AQQ--DKSGLPSDRFSAERPE-GSVSTLK------IQRTQQWDSAMYLCAS
SL-----
>V170RF-AHZZ01067653.1-trbv |(5340, 5640)|2.46987090521|(0.928,0.916,0.748)|-1
-----HTGAGVSQSPSNKVTEKGKDVVLRCDPISG-------HAVLYWYRQNLGQGLEFL
IYFQGK---GAV--DDSGLCSDRFSATRPE-GSASTLK------IQHTEQGDSAMYFCAS
SL-----
>V172RF-AHZZ01067653.1-trbv |(13070, 13360)|2.47300400703|(0.878,0.758,0.894)|-1
-------DCGVTQTPKHLITAIGQQVTLRCSPRSG-------DLSVYWYQQSLGQGLQFL
IQYYNGE---ER--AK-GNILERFSAQQFP-DLHSELN------LSSLELGDSALYFCAS
SL-----
>V177RF-AHZZ01067655.1-trbv |(10936, 11249)|2.50177098894|(0.913,0.878,0.782)|-1
-----SLDTAVSQTPKYLVTQTGKNESLKCEQNLG-------HNAMYWYKQDSKKLLKIM
FIYNNK---EPI--LNETV-PNRFSPKSPD-KAHLNLH------IKSVELGDSAVYFCAS
SQDTALQ
>V179RF-AHZZ01067655.1-trbv |(26234, 26531)|2.73850147823|(0.916,0.963,0.875)|-1
-----LVNAGVTQTPKFQVLKTGQNMTLKCAQDMN-------HDRMYWYRQDPGMGLRLI
HYSAGEG--S----TEKGEVSNGYNASRLN-KKDFLLR------LESAAPSQTSMYFCAS
SE-----
>V180RF-AHZZ01067655.1-trbv |(28925, 29222)|2.63215664392|(0.920,0.938,0.817)|-1
-----PVNAGVTQTPKFQILKTGQNMTLKCAQDMN-------HNYMYWYRQDPGMGLRLI
HYSAGEG--S----TEKGEVPDGYNASRLN-PQNFLLR------LESAAPSQTSMYFCAS
SE-----
>V181RF-AHZZ01067655.1-trbv |(32665, 32965)|2.54930576921|(0.928,0.853,0.829)|-1
-----HTGAGVSQSPRNKVTEEGKDVVLRCDPISG-------HTALYWYRQSLGKGLEFL
IYFQGN---DAP--DKSGLPSGRFSAERTE-GSVSTLK------IQRTEQGDSAVYLCAS
SL-----
>V183RF-AHZZ01067656.1-trbv |(14292, 14589)|2.5952130114|(0.897,0.863,0.849)|-1
-----PLDTAVFQTPKYLVTQTGKKESLKCEQNLG-------HDTMYWYKQDSKKLLKIM
FIYSNK---EPI--LNETV-PNRFSPDSPD-KAHLNLH------IKSVELGDSAVYFCAS
SQ-----
>V184RF-AHZZ01067656.1-trbv |(18626, 18923)|2.45745359449|(0.861,0.807,0.811)|-1
-----PTDTGVTQTPKHLVMGMTNKKSLKCEQHLG-------HNAMYWYKQKAKKPPELM
FIYNYE---KLS--INESV-PSRFSPECSK-SSLLYLH------LRALQPEDSALYLCAS
SQ-----
>V185RF-AHZZ01067656.1-trbv |(37172, 37469)|2.7976448876|(0.924,0.915,0.966)|-1
-----PANADVTQSPKFQILKTGQSMTLQCAQDMN-------HNSMYWYRQDPGMGLRLI
HYSATKD--T----TDPGEVPDGYSVSRLN-KKEFLLK------LESAAPSQTSVYFCAS
SE-----
>V189RF-AHZZ01069458.1-ighv |(26822, 27131)|2.99698000014|(0.998,1.000,0.999)|-1
----VQCEVQLVE-SGGGLVQPGGSLRLSCAASGFTF-S---SYDMSWVRQAPGKGLEWV
SYISNG-G-GST--YYADSVKGRFTISRDNSKNTLSLQ------MNSLRAEDTAVYYCAK
-------
>V190RF-AHZZ01069461.1-ighv |(27499, 27811)|2.88710611876|(0.964,0.982,0.944)|-1
----VLSQVQLQE-SGPGLVKPPETLSLTCAVSGGSI-S--DSYYWSWIRQPPGKGLEWI
GYIYGG-S-GST--SYNPSLKSRVTLSVDTSKNQFSLK------LSSVTAADTAVYYCAR
-------
>V192RF-AHZZ01084890.1-ighv |(9388, 9701)|2.93053571945|(0.996,0.993,0.950)|-1
----VQCEVQLVE-SGGGLVQPGGSLRLSCAASGFTF-S---NSWMNWVRQAPGKGLEWV
ARIKSKADGETA--DYAASVKGRFTISRDDSKNTLYLQ------MNSLKTEDTAVYYCT-
-------
>V197RF-AHZZ01084893.1-ighv |(12328, 12643)|2.98389600501|(0.996,0.997,0.991)|-1
----VQCEVQLVE-SGGGLVQPGRSLRLSCAASGFTF-S---NYYMDWVRQAPGKGLEWV
GRIRNKANSYTT--EYAASVKGRFTISRDDSKNTLYLQ------MSSLKTEDTAVYYCAR
-------
>V203RF-AHZZ01089506.1-iglv |(37855, 38165)|2.75648244609|(0.973,0.888,0.931)|-1
----SLSQPVLTQ-PASLSASPGASARLTCTLSSG---INVGSYRIYWYQQKPGSPPRYL
LNYYSDS--DK---DQGSGVPSRFSGSKDASANAGLLL------ISGLQSEDEADYYCAI
-------
>V204RF-AHZZ01089506.1-iglv |(48570, 48877)|2.78145111307|(0.941,0.891,0.961)|-1
----SWAQSVLTQ-PPSVSAAPGQKVTISCSGSSS---NIG-SKYVSWYQQLPGTAPKLL
IY----D--NN---KRPSGISDRFSGSKS--GTSATLA------ITGLQTGDEADYYCAA
WDNSLS-
>V205RF-AHZZ01089506.1-iglv |(53590, 53897)|2.87085799131|(0.980,0.959,0.940)|-1
----SWAQSVLTQ-PPSVSGDPGQRVTISCTGSSS---NIG-GYYVYWYQQLPGTAPKLL
IY----D--NN---KRPSGVSDRFSGSKS--GTSASLT------ITGLQPGDEADYYCGA
WDSSLS-
>V206RF-AHZZ01089506.1-iglv |(59408, 59715)|2.82273871433|(0.972,0.924,0.940)|-1
----SRAQSVLTQ-PPSVSGAPGQKVTISCTGSSS---NIG-GYNVYWYQQLPGTAPKLL
IY----D--NN---KRPSGISDRFSGSKS--GTSASLA------ITGLLPEDEADYYCQS
YDSSLS-
>V208RF-AHZZ01089506.1-iglv |(88028, 88337)|2.74941528247|(0.963,0.876,0.942)|-1
----SWAQSVLTQ-PRSASEAARKSVTISCSGSSS---NIG-SNSVSWYQQLPGTAPKLL
IY----Y--ND---QRASGVSDRFSGSKS--GTSASLA------ISGLQTEDEADYYCTA
WDDSLSG
>V213RF-AHZZ01089508.1-iglv |(11286, 11596)|2.62159539143|(0.964,0.843,0.892)|-1
----SLSQPVLTQ-PTSLSASPGASARLTCTLRSG---ISVGSYRIFWYQQKPGSPPRYL
LWYKSDS--DK---HQGSGVPSRFSGSKDASANAGILL------ISGLQSEDEADYYCTT
-------
>V214RF-AHZZ01089508.1-iglv |(16094, 16403)|2.8515959051|(0.989,0.914,0.972)|-1
----SWAQSVLTQ-PPSASGAPGQRVTISCSGSSS---NIG-SNNVYWYQQFPGTAPKLL
IY----Y--SN---QRPSGVPDRFSGSKS--GTSASLA------ITGLRSEDEADYYCAA
WDDSLSS
>V215RF-AHZZ01090491.1-ighv |(1149, 1458)|2.85865734643|(0.999,0.982,0.910)|-1
----VQCEVQLVE-SGGGLVKPGASLRLSCAASGFTF-S---SYGMHWVRQAPGKGLEWV
SSISSD--SSYI--YYADSVKGRFTISRDNAKNSLSLQ------MNSLRAEDTAVYYCAR
-------
>V218RF-AHZZ01090494.1-ighv |(1969, 2281)|2.91416889635|(0.962,0.975,0.979)|-1
----VLSQVKLQE-SGPGLVKPSETLSLTCTVSSGSI-S--DSYYWSWIRQAPGKGLEWI
GRIYSS--GSST--NYNPSLKNRVTISTDTSKNQFSLK------LSSVTAADTAVYYCAR
-------
>V220RF-AHZZ01093946.1-trav |(12355, 12645)|2.35341387105|(0.756,0.781,0.867)|-1
----VSSEDKVMQNPLSLVVHEGDTVTLNCSYEVV-----N-FQSLLWYKQEK-KAPTFL
FTLTSSG--IE---KKSGRLSSILDKK----DFFSILN------ITATQTRDSAVYLCAV
E------
>V221RF-AHZZ01093949.1-trav |(3892, 4191)|2.37457757436|(0.843,0.795,0.768)|-1
-----VNGQQIMQIPQYQHVQEGEDFTTYCNSSTT-------LNNIQWYKQRPGGHPVFL
IMLVKSG--EV---KKQKRLTFQFGEA----KKNSSLH------ITATQTTDVGSYFCAG
HSAPQ--
>V227RF-AHZZ01096568.1-ighv |(3158, 3467)|2.93970402421|(0.984,0.977,0.979)|-1
----VLSQVQLQE-SGPGLVKPSETLSLTCAVSGGSI-S---SSYWNWIRQAPGKGLEWI
GRIYSS--GSST--NYNPSLKNRVTISTDTSKNQFSLK------LSSVTAADTAVYYCAR
-------
>V228RF-AHZZ01096568.1-ighv |(16270, 16579)|2.87927015267|(0.993,0.919,0.989)|-1
----VQGEVQLVE-SGGGLAKPGGSLRLSCAASGFTF-S---SYGMSWVRQAPGKGLEWV
SAISSG-G-GST--YYADSVKGRFTISRDNSKNTLSLQ------MNSLRAEDTAVYYCAK
-------
>V230RF-AHZZ01096574.1-ighv |(7206, 7516)|2.98045211916|(0.996,1.000,0.985)|-1
----VQCEVQLVE-SGGGLAQPGGSLRLSCVASGFTF-S---DHYMDWVRQAPGKGLEWV
SSISTGSG-STT--LYPDSVKGRFTISRDNAKNTVYLQ------MNSLRAEDTAVYYCA-
-------
>V235RF-AHZZ01103094.1-ighv |(666, 977)|2.8984255402|(0.996,0.987,0.932)|-1
----VQCEVQLVE-SGGGVVQPGGSLRLSCAASGFTF-D---DYAMGWVRQAPGKGLEWV
SAISWSG--GST--GYADSVKGRFTISRDNAKNSLYLQ------MNRLRAEDTALYYCAK
D------
>V237RF-AHZZ01103097.1-ighv |(667, 978)|2.94921046559|(0.972,0.995,0.985)|-1
----VQCDVQLVE-SGGGLVKPGGSLRLSCVASGFTF-S---SYEMHWVRQAPGKGLEWV
SGISTS--GGTT--YYADSVKGRFTISRDNAKNSLFLQ------MNSLRAEDTAVYYCAK
E------
>V239RF-AHZZ01103258.1-ighv |(1265, 1574)|2.91621046559|(0.985,0.962,0.972)|-1
----VLSQVQLQE-SGPGLVKPSETLSLTCAVSGGSI-S---SNYWNWIRQAPGKGLEWI
GSIYSS--GSST--NYNPSLKNRVTISTDTSKNQFSLK------LSSVTAADTAVYYCAR
-------
>V240RF-AHZZ01104243.1-igkv |(7682, 7981)|2.79143885587|(0.985,0.870,0.988)|-1
----TTGEIVLTQSPATLSLSPGERATLSCRASQSVS------SSLAWYQQKSGQAPRLL
IY----G--AS---SRATGIPDRFSGSGS--GTDFTLT------ISILEPEDVAVYYCQQ
YYNWN--
>V241RF-AHZZ01105198.1-iglv |(1704, 2007)|2.8479084505|(0.996,0.913,0.969)|-1
----SWAQSALTQ-PRSVSGSPGQSVTISCTGTSS---DIGGYNYVSWYQQHPGKAPKLM
IY----D--VS---KRPSGVSDRFSGSKS--GNTASLT------ISGLQAEDEADYYCSS
YAGS---
>V243RF-AHZZ01105199.1-iglv |(5057, 5367)|2.8276249066|(0.976,0.896,0.981)|-1
----SWAQAALTQ-PPSVSKSLGQSVTISCTGTSN---DIGGYNAVSWYQQHPGTAPRLL
IY----E--VS---NRPSGVSDRFSGSKS--GNTASLT------ISGLQAEDEADYYCGS
YRSGST-
>V244RF-AHZZ01105199.1-iglv |(17460, 17763)|2.80771781723|(0.987,0.906,0.947)|-1
----SAASYELTQ-PHSVSVSPGQTARITCGG------DNIGSKYVQWYQQKPAQAPVLV
IY----A--DS---ERPSGIPERFSGSKS--GNTATLT------ISGVEAGDEADYYCQV
WDSSSDH
>V249RF-AHZZ01105201.1-iglv |(63444, 63754)|2.96126023048|(0.993,0.989,0.980)|-1
----SWAQSALTQ-PPSVSGSPGQSVTISCTGTSS---DVGGYNYVSWYQQHPGTAPKLM
IY----D--VS---NRPSGVSDRFSGSKS--GNTASLT------ISGLQAEDEADYYCCS
YTTSST-
>V251RF-AHZZ01106331.1-igkv |(10056, 10356)|2.96748011776|(0.994,0.983,0.991)|-1
----ARCDIQLTQSPSSLSASVGDRVTITCRASQGIS------SYLAWYQQKPGKAPKLL
IY----D--AS---NLQSGVPSRFSGSGS--GTEFTLT------ISSLQPEDFAVYYCQQ
RNSYP--
>V252RF-AHZZ01106331.1-igkv |(16128, 16428)|2.8590333829|(0.990,0.986,0.909)|-1
----AKCDIQMTQSPSSLSASVGDRVTITCRASQGIS------SYLAWYQQKPGKAPKPL
IY----Y--AS---NLESGVPSRFSGSGS--GTEFTLT------ISSLQPEDFATYYCQQ
YNSAP--
>V253RF-AHZZ01106331.1-igkv |(33100, 33400)|2.80291286311|(0.982,0.991,0.875)|-1
----ARCDIQMTQSPSSLSASAGDRVTITCRASQGIS------TYLNWYQQKPGKAPTRL
IY----A--AS---SLQSGVPSRFSGSGS--GTEFTLT------ISSLQPEDFATYYCLQ
YNSAP--
>V254RF-AHZZ01106331.1-igkv |(43583, 43883)|2.77644925142|(0.952,0.875,0.975)|-1
----TTGETVMTQSPATLSLSPGERATLSCRASQSV------GSSLAWYQQKPGQAPRLL
VY----Y--AS---SRATGIPDRFSGSGS--GTDFTLT------ISSLEPEDVGVYYCQK
YNDWP--
>V259RF-AHZZ01107395.1-igkv |(1617, 1915)|2.73963747374|(0.925,0.892,0.927)|-1
----TTGEIVMTQSPATLSLSPGERATLSCRASQSVN------SYLAWYQQKPGQAPRLL
IY----D--AS---SRATGIPDRFSGSGS--GTDFTLT------ISSLEPEDVAVYFCLQ
SSNW---
>V260RF-AHZZ01107399.1-igkv |(425, 725)|2.95975367204|(0.998,0.977,0.987)|-1
----AKCDIQMTQSPPSLSASVGDRVTITCQASQGIS------NWLAWYQQKPGEAPKLL
IY----A--AS---TLQSGVPSRFSGSGS--GTEFTLT------ISSLQPEDFATYYCQQ
HNSYP--
>V261RF-AHZZ01108758.1-ighv |(6447, 6754)|2.91982866804|(0.980,0.963,0.978)|-1
----VLSQVQLQE-SGPGVVKPSETLSLTCAVYGGSV-S---GSYWSWIRQAPGKGLEWI
GEINGN-S-GST--SYNPSLKSRVTISTDTSKNQFSLK------LSSVTAADTAVYYCA-
-------
>V262RF-AHZZ01110488.1-igkv |(1345, 1645)|2.96427613247|(0.988,0.979,0.998)|-1
----ARCDIQMTQSPSSLSASVGDKVTITCHASQSIS------SWLAWYQQKPGKAPKLL
IY----K--AS---SLQSGVPSRFSGSGS--GTDFTLT------ISSLQPEDFATYYCQQ
YDSNH--
>V263RF-AHZZ01111138.1-igkv |(1438, 1738)|2.95108424741|(0.994,0.967,0.993)|-1
----ARCDIQMTQSPSSLSASVGDKVTITCHASQGIS------SWLSWYQQKPGKAPKLL
IY----K--AS---SLQSGVPSRFSGSGS--GTDFTLT------ISSLQPEDFATYYCQQ
YSSSP--
>V265RF-AHZZ01111138.1-igkv |(14203, 14503)|2.98248011776|(0.997,1.000,0.986)|-1
----ARCDIQMTQSPPSLSASVGDRVTITCQASQSIS------NYLAWYQQKPGKAPKLL
IY----A--AS---TLQSGVPSRFSGSGS--GTEFTLT------ISSLQPEDFATYYCQR
HNSYP--
>V266RF-AHZZ01111367.1-igkv |(1438, 1738)|2.95108424741|(0.994,0.967,0.993)|-1
----ARCDIQMTQSPSSLSASVGDKVTITCHASQGIS------SWLSWYQQKPGKAPKLL
IY----K--AS---SLQSGVPSRFSGSGS--GTDFTLT------ISSLQPEDFATYYCQQ
YSSSP--
>V268RF-AHZZ01111367.1-igkv |(14330, 14630)|2.97352104271|(0.997,1.000,0.978)|-1
----ARCDIQMTQSPPSLSASVGDRVTITCQASQGIS------NYLAWYQQKPGKAPKLL
IY----A--AS---TLQSGVASRFSGSGS--GTEFTLT------ISSLQPEDFATYYCQQ
HNSYP--
>V269RF-AHZZ01112481.1-ighv |(613, 919)|2.92356084981|(0.979,0.985,0.961)|-1
----VLSQVQLQE-SGPGVVKPSETLSLTCAVSGGSI-S---SSYWSWIRQPPGKGLEWI
GYIYGG-G--ST--NYNPSLKSRVTMSADTSKNQLSLK------LSSVTAADTAVYYCAR
-------
>V270RF-AHZZ01125719.1-ighv |(24239, 24554)|2.91204205111|(0.987,0.997,0.938)|-1
----VQCEVQLVE-SGGGLVQPGGSLRVSCAASGFTF-S---NHYMQWVRQAPGKGLEWV
GFIRNKANGGTA--EYAASVKGRFTISRDDSKSIASLQ------MNSLKTEDTAVYYCAR
-------
>V271RF-AHZZ01125719.1-ighv |(41713, 42022)|2.88413808115|(0.940,0.967,0.990)|-1
----VQCEVQLAE-SGGGLVQPGGSLRLSCAASGFTF-S---SYEMHWVRQAPGKGLESV
SVISGD--SSYT--HYADSVKGRFTISRDNAKNSLSLQ------MNSLRAEDTAVYYCAR
-------
>V274RF-AHZZ01185532.1-igkv |(806, 1093)|2.76469891567|(0.970,0.881,0.947)|-1
--------TVVTQSPATLSLSPGERATISCRTSQSVG------SRLAWYQQKPGQAPRLL
IY----G--AS---NRATGIPDRFSGSGS--GTDFTLT------ISSLKPEDAAVYYCQQ
DNDWK--
>V275RF-AHZZ01189918.1-igkv |(12178, 12478)|2.98866005261|(1.000,0.991,0.998)|-1
----ARCDIQMTQSPSSRSASVGDTVTITCQASQGIS------DYLAWYQQKPGKAPKLL
IY----A--AS---NLESGVPSRFSGSGS--GTDFTLT------ISSLQPEDFATYYCQQ
YDSDP--
>V276RF-AHZZ01189922.1-igkv |(4528, 4816)|2.75843538699|(0.978,0.923,0.896)|-1
--------IVMTQSPATLSLSLGETATISCRTSQSVG------SKLAWYQQKPGQAPRLL
IY----G--AS---SRATGIPDRFSGSGS--GTDFTLT------ISSLEPEDFAVYYCQE
TSNLS--
>V277RF-AHZZ01189923.1-igkv |(14019, 14319)|2.82897916207|(0.935,0.914,0.997)|-1
----ARCDIQMTLSPSSLSASVGDRVTITCRASQDIS------SYLNWYQQKPGKAPKLL
IY----Y--AT---SLESGVPSRFSGSGS--GTDFTLT------ISSLQPEDFATYYCQQ
FKSYP--
>V281RF-AHZZ01198550.1-iglv |(8130, 8433)|2.65341399606|(0.980,0.817,0.959)|-1
----SWAQAALTQ-PHSVSGSPGQSVTISCTGTSS---DIGGYDRVSWYQQHPGKAPKLM
IY----E--VS---KRPSGVSDRFSGSKS--GNTASLT------ISGLQAEDEADYYCSS
YAGS---
>V283RF-AHZZ01198551.1-iglv |(10418, 10728)|2.93266595283|(0.989,0.967,0.979)|-1
----SWAQSAPTQ-PPSVSGSPGQSVTISCTGTSS---DIGYYNAVSWYQQHPGTAPKLM
IY----R--VS---NRPSGVSDRFSGSKS--GNTASLT------ISGLQAEDEADYYCSS
YAGSDT-
>V284RF-AHZZ01198551.1-iglv |(33935, 34238)|2.64932570901|(0.978,0.865,0.888)|-1
----SAASYELTQ-PPSVSVSPGQMARITCSG------DALPEKYADWYQQKPGQSPVLI
IY----E--DS---KWPSGIPERFSGSSS--GTVATLT------ISGAQVEDEADYYCYS
TDSSGNH
>V287RF-AHZZ01198553.1-iglv |(39757, 40060)|2.66447706835|(0.911,0.841,0.934)|-1
----SEASYELIQ-PPSVSVSPGQTARITCSG------DALPDYYAYWYQQKSGQAPMLV
IY----K--DS---ERPSGIPERFSGSSS--GTTVTLT------ISGVQAEDEADYYCQS
ADSSGNH
>V288RF-AHZZ01198553.1-iglv |(56860, 57163)|2.8170138344|(0.960,0.910,0.957)|-1
----SATSYELTQ-PPSVSAASGQTARITCGG------DSIGSKNVQWYQQKPAQAPVLV
IY----A--DS---KRPSGIPERFSGSNS--GNTATLT------ISGVEAGDEADYYCQV
WDSSSKH
>V289RF-AHZZ01198553.1-iglv |(68992, 69302)|2.88230439061|(0.989,0.932,0.975)|-1
----SWAQAALTQ-PPSVSGSPGQSVTISCTGTSS---DIGGYNYVSWYQQHPGKAPKLM
IY----E--VS---KRPSGVSDRFSGSKS--GNTASLT------ISGLQAEDEADYYCGS
YASSST-
>V3RF-ABGA01025791.1-ighv |(3901, 4216)|2.99275601537|(0.994,0.999,1.000)|1
----VQCEVQLVE-SGGGLVQPGGSLRLSCAASGFTF-S---SYWMSWVRQAPGKGLEWV
GFIKNKADGGTT--DYAASVKGRFTISRDDSKNTLYLQ------MNSLKTEDTAIYYCAR
-------
>V5RF-ABGA01025797.1-ighv |(8415, 8724)|2.91783228016|(0.962,0.989,0.970)|1
----VQCEVQLVE-SGGGLVQPGGSLRLSCVASGFTF-S---SYAMRWVHQAPGKGLEWV
SAISG-SG-GST--WYPDSVKGRFTISRDNAKNTLYLQ------MNSLRAEDTAVYYCVR
-------
>V6RF-ABGA01025808.1-ighv |(3704, 4019)|2.97580001|(0.992,0.987,0.997)|1
----VQCEVQLVE-SGGGLVQPGGSLRLSCAASGFTF-S---SSAMHWVRQAPGKGLEWV
GRIRSKANSYAT--EYAASVKGRFTISRDDSKNTAYLQ------MNSLKTEDTALYYCTT
-------
>V7RF-ABGA01025808.1-ighv |(11416, 11731)|2.98164005313|(0.998,0.995,0.989)|1
----LQCEVQLVE-SGGGLVQPGGSLRLSCAASGFTF-S---DHYMDWVRQAPGKGLEWV
ARIRNKANSYTT--EYAASVKGRFTISRDDSKNTLYLQ------MSSLKTEDTAVYYCAR
-------
>V8RF-ABGA01025808.1-ighv |(27673, 27982)|2.96800135931|(1.000,0.980,0.990)|1
----VQCEVQLVE-SGGGLVQPGGSLRLSCAASGFTF-R---DHYMNWVRQAPGKGLEWV
SAISG-SS-SST--YYADSVKGRFTISRDNAKNTLYLQ------MNSLRAEDTAVYYCVR
-------
>V9RF-ABGA01025808.1-ighv |(39511, 39826)|2.93390741148|(0.987,0.995,0.956)|1
----VQCEVQLVE-SGGGLVQPGGSLRLSCAASGFTF-S---NYYMSWVRQAPGKGLEWE
GFIKNKTNGGTT--EYAASVKGRFTISRDDSKSITYLQ------MSSLKTEDTAVYYCTR
-------
>V13RF-ABGA01025810.1-ighv |(7175, 7481)|2.97851211712|(0.989,0.990,1.000)|1
----VQCEVQLVE-SGGGLVQPGGSLRLSCAASGFTI-S---SYDMHWVHQAPGKGLEWV
SAIST--G-GGT--YYADSVKGRFTISRDNAKNTLYLQ------MNNLRAEDTAVYYCAK
-------
>V14RF-ABGA01037228.1-ighv |(1414, 1723)|2.86127460261|(0.997,0.906,0.991)|1
----VLSQVQLQE-SGPGLVKPSETLSLTCAVSGGSI-S-SG-YYWGWIRQPPGKGLEWI
GSIYYS---GST--YYNPSLKSRVTISVDTSKNQFSLK------LSSVTAEDTAVYYCAR
-------
>V15RF-ABGA01044302.1-ighv |(5170, 5476)|2.96598000014|(0.989,0.987,0.990)|1
----VLSQVQLQE-SGPGLVKPSETLSLTCAVSGGSI-S---SYYWSWIQQPPGKGLEWI
GYIYSS---GST--NYNPSLKSRVTMSVDTSKNQFSLK------LSSVTAADTAVYYCAR
-------
>V17RF-ABGA01044304.1-ighv |(6033, 6342)|2.86617331012|(1.000,0.906,0.995)|1
----VLSQVQLQE-SGPGLVKPSETLSLTCAVSGGSI-S-SG-YYWGWIRQPPGKGLEWI
GSIYYS---GST--YYNPSLKSRVTISVDTSKNQFSLK------LSSVTAADTAVYYCAR
-------
>V18RF-ABGA01044305.1-ighv |(3517, 3823)|2.96050267138|(0.998,0.991,0.974)|1
----VLSQVQLQE-SGPGLVKPSETLSLTCAVSGGSI-S---SYYWGWIRQPPGKGLEWI
GYIYSS---GST--NYNPSLKSRVTMSVDTSKNQFSLK------LSSVTAADTAVYYCVR
-------
>V19RF-ABGA01044306.1-ighv |(1052, 1358)|2.98599600001|(0.995,0.995,0.996)|1
----VLSQVQLQE-SGPGLVKPSETLSLTCAVSGGSI-S---SNYWSWIRQPPGKGLEWI
GYIYSS---GST--YYNPSLKSRVTMSIDTSKNQFSLK------LSSVTAADTAVYYCAR
-------
>V21RF-ABGA01044307.1-ighv |(456, 762)|2.98128017622|(1.000,0.994,0.988)|1
----VLSQVQLQE-SGPGLVKPSETLSLTCAVSGGSI-S---SYYWSWIRQPPGKGLEWI
GGIYSS---GST--YYNPSLKSRVTISVDTSKNQFSLK------LSSVTAADTAVYYCAR
-------
>V25RF-ABGA01044313.1-ighv |(11041, 11356)|2.96100040988|(0.994,0.979,0.989)|1
----VQCEVQLVE-SGGGLVHPGGSLRLSCTASGFTF-G---DYAMSWVRQAPGKGLEWV
GFIRSKAYGGTT--EYAASVKGRFTISRDDSKSIAYLQ------MNSLKTEDTAVYYCAR
-------
>V29RF-ABGA01044319.1-ighv |(4092, 4401)|2.90754055392|(0.945,0.991,0.987)|1
----VQCEVQLVE-SEGGLVQPGGSLRLSCAASGFTF-D---DYAMHWVRQAPGKGLKWV
SGINWN--GGST--YYADSVKGRFTISRDNSKNSLYLQ------MNSLRAEDTALYYCAK
-------
>V32RF-ABGA01058270.1-ighv |(38768, 39077)|2.83515456587|(0.963,0.922,0.957)|1
----VLSQVRLQE-SGPGLVKPSETLSLTCAVSVDSI-S-S-GYYWSWIRQPPGKGLEWI
GYIHHS---GST--YYNPSLKSRVTMSVDTSKNQFSLK------LSSVTAADMAVYYCAT
-------
>V33RF-ABGA01058273.1-ighv |(621, 936)|2.96867205249|(0.987,0.986,0.996)|1
----VQCDVQLVE-SGGGLVQPGGSLRLSCAASGFTF-S---DYYMSWVHQPPGKGLEWV
GLIRNKANGGTT--EYAASVKGRFTISRDDSKSIAYLQ------MNSLKTEDTAVYYCTR
-------
>V38RF-ABGA01091248.1-trbv |(29358, 29658)|2.43269226172|(0.942,0.881,0.755)|1
-----HTDAGVIQSPRHEVTEMGKEVTLRCKPISG-------HEDLFWYRQTMMQGLELL
IYFNNK---AVM--DDSGMPKDRFSAKMPN-ASFSTLK------IQPSEPRDSAVYFCAS
SL-----
>V42RF-ABGA01091249.1-trbv |(14302, 14599)|2.43540308202|(0.892,0.847,0.766)|1
-----HGVAMVIQNPRYQVTQFGKPVTLSCSQNLN-------HNVMYWYQQKSSQAPKLL
FHYYDKD---FN--NE-ADTPDNFQSRRPN-TSFCFLD------IRSPGLGDAAMYLCAT
SR-----
>V45RF-ABGA01091252.1-trbv |(2503, 2800)|2.73999588466|(0.905,0.951,0.893)|1
-----TVDGGITQSPKYLFRKEGQNVTLSCEQNLN-------HDAMYWYRQDPGQGLRLI
YYSGIVN--D----FQKGDIAEGYSVSREK-KESFPLT------VTSAQKNPTAFYLCAS
SI-----
>V48RF-ABGA01091257.1-trbv |(2769, 3069)|2.51248400784|(0.892,0.827,0.827)|1
-----SFHARVTQTPGHLVKGKGQKTKMDCTPEKG-------HTFVYWYQQNQNKEFMLL
ISFQNKQ---VL--QETEMHKKRFSSQCPK-NTPCSLA------TLSSEPGDTALYLCAS
SQ-----
>V49RF-ABGA01091257.1-trbv |(13504, 13802)|2.63469983482|(0.888,0.908,0.847)|1
-----SMDADVTQTPRNRITKTGKRIMLECSQTKG-------HDGMYWYRQDPGLGLRLI
YYSFDVK--D----INKGEISDGYSVSRRT-QAKFSLS------LESATPNQTALYFCAT
SD-----
>V50RF-ABGA01091260.1-trbv |(5031, 5328)|2.4723006368|(0.908,0.901,0.754)|1
-----LMEADIYQTPRHLVIGTGKKITLECSQTMG-------HDKMYWYQQDPGMELHLI
HYSYGVN--S----TEKGDLSSESTVSRIR-MEHFPLT------LESARPSHTSQYLCAS
SE-----
>V51RF-ABGA01091263.1-trbv |(8280, 8583)|2.45686734764|(0.863,0.792,0.827)|1
----SVFSAVVSQKPSRDICQRGTSLTIQCQVDSQ-------VTMMFWYRQQPGQSLTLI
ATANQGS--EAT--YESGFVIDKFPISRPN-LTFSTLT------VSNMSPEDSGIYLCSV
E------
>V56RF-ABGA01099940.1-ighv |(16077, 16386)|2.90476452501|(0.969,0.993,0.947)|1
----AHAEVQLVQ-SGAEVKKPGASVKFSCKVSGYTF-T---ELSMHWVRQAPGKGLEWM
GGFDPD-D-GET--IYAQKFQGRVTMTEDTSTDTAYME------LSSLRSEDTAMYYCAT
-------
>V57RF-ABGA01099941.1-ighv |(996, 1308)|2.94516889635|(0.981,0.968,0.998)|1
----VQCEVQLVE-SGGGLVQPGGSLRLSCAASGFTF-T---NYYLHWFRQAPGKGLEWV
AYISSG-SGGST--NYPDSVKGRFTISRDNAKNTLYLQ------MNSLRAEDTAVYYCAR
-------
>V58RF-ABGA01099941.1-ighv |(12097, 12412)|2.84061113875|(0.975,0.998,0.895)|1
----VQCEVQLVE-SGGGLVQPGGSLRLSCAASGFTF-S---NYYMHWVRQAPGKGLEWV
GFIRTEAKGGTT--EYAASVKGRFTISRDDSKSIAYLQ------TNSLKTEDTAVYYCTR
-------
>V59RF-ABGA01099945.1-ighv |(5584, 5899)|2.85878326128|(0.985,0.924,0.966)|1
----VQCEVQLVE-SGGGLVQPGGSLRLSCAASGFTF-S---NAWLSWVRQAPGKGLEWV
GRIKSKADGGTT--DYAAPVKGRFTISRDDSKNTLYLQ------MNSLKTEDTAVYYCAT
-------
>V60RF-ABGA01099946.1-ighv |(22626, 22932)|2.96494028297|(0.981,0.993,0.992)|1
----VQCEVQLVE-SGGGLVQPGGSLRLSCAASGFTV-S---SYDMHWVRQAPGKGLEWV
SAIDTD---GDT--YYADSVKGRFTISRENAKNSLYLQ------MNSLRAKDTAVYYCAR
-------
>V61RF-ABGA01099946.1-ighv |(36315, 36622)|2.95444887221|(0.994,0.986,0.976)|1
----VQCEVQLVE-SGGGLVQPGRSLRLSCAASGITF-S---NQYMSWVRQATGKGLEWV
SYISGD-S-SYT--SYADSVKGRFTISRDNAKNSLYLQ------MNSLRVEDTAVYYCV-
-------
>V62RF-ABGA01099947.1-ighv |(19776, 20085)|2.93471942965|(0.983,0.997,0.958)|1
----VQCEVQLVE-SGGGLVQPGGSLRLSCAASGFTF-S---SYSMSWVRQAPGKGLEWV
SAISG-SG-SST--YYPDSVKGRFTISRDNAKNTLYLQ------MNSLRAEDMAVYYCVR
-------
>V63RF-ABGA01099948.1-ighv |(6262, 6577)|2.87509784876|(0.959,0.998,0.928)|1
----VQCEVQLVE-SGGGLVQPGGSLRLSCAASGFTF-S---NYYMHWVRQAPGKGLEWV
GFIASKAYGGTT--EYAASVKGRFTISRDDSKSIVYLQ------MNSLKTEGTAVYYCTR
-------
>V65RF-ABGA01099956.1-ighv |(15185, 15494)|2.92682484549|(0.994,0.988,0.952)|1
----VQCEVQLVE-SGGGLVQPGGSLRLSCAASGFTF-S---SYAMYWVRQAPGKGLEWV
SAINSG--GGST--YYADSVKGRFTISRENAKNTLYLQ------MSSLRAEDTAVYYCAK
-------
>V66RF-ABGA01104800.1-ighv |(1132, 1438)|2.91210292772|(0.991,0.986,0.944)|1
----VLSQVQLQE-SGPGLVKPSETLSLTCAVSGGSI-S-G--YSWSWIRQPPGKGLEWI
GSIHSS---GST--YYNPSLKSRVTISADTSKNQFSLK------LSSVTAADTAVYYCAR
-------
>V68RF-ABGA01129113.1-trbv |(1435, 1735)|2.51355900853|(0.902,0.907,0.771)|1
-----HTGAGVSQSPRYKVAKRGQDVALRCDSIFG-------HVTFYWYQQTLGQGPEVL
TYFRSD---AQR--DKSGLPSGRFSAERPE-GSVSTMK------IQHTEQGDSAVYLCAS
SL-----
>V73RF-ABGA01174988.1-ighv |(27125, 27434)|2.90558443703|(0.985,0.945,0.982)|1
----VQCEVQLVE-SGGGLVQSRGSLRLSCAASGFTF-S---SCGMNWVRQAPGKGLEWV
AVIWYD-G-SNK--YYADSVKGRFTISRDNSKNMLYLQ------MNSLRVEDTAVYYCAK
-------
>V78RF-ABGA01174999.1-ighv |(1443, 1758)|2.9834040992|(0.989,0.999,0.996)|1
----VQCEVQLVE-SGGGLVQPGGSLRLSCAASGFTF-S---DYYMSWVHQPPGKGLEWV
GLIRNKANGGTT--EYAASVKGRFTISRDDSKSIAYLQ------MNSLKTEDTAVYYCTR
-------
>V80RF-ABGA01194059.1-ighv |(3549, 3864)|2.94462999772|(0.967,1.000,0.983)|1
----VQCEVQLVE-SGGGLVQPGGSLRLSCAASGFTF-S---NHYMQWVRQAPGKGLEWV
GLIRNKADGETT--DYAASVKGRVTISRDDSKSITYLQ------MSSLKTEDSAVYYCAR
-------
>V85RF-ABGA01198108.1-igkv |(6191, 6491)|2.86132527582|(0.949,0.931,0.989)|1
----ARCDIQMTQSPTSLSASIGDSVTSTCQASQSIS------NELAWYQQKPGKVPKLL
IY----R--VS---SLQMGIPSRFSGSGS--GTDFTLT------ITSLQPDDVATYYCQQ
EYSYP--
>V89RF-ABGA01243345.1-ighv |(15320, 15629)|2.98574403277|(0.998,0.998,0.990)|1
----VQCEVQLVE-SGGGLVQPGGSLRLSCAASGFTF-S---SYGMHWVRQAPGKGLEWV
AVIWYD--GSNK--YYADSVKGRFTISRDNSKNTLYLQ------MNSLRVEDTAVYYCAK
-------
>V93RF-ABGA01285645.1-igkv |(2124, 2410)|2.71819778573|(0.937,0.856,0.952)|1
--------IVMMQSPATLSVSPGERGTISCRASQSVS------NYLAWYQQKPGQSPRLL
IY----R--AS---NRATGIPARFSGSGS--GTDFTLT------ISSVELEDFAVYYCQQ
YNAG---
>V94RF-ABGA01285648.1-igkv |(32619, 32919)|2.97528017622|(0.994,0.982,1.000)|1
----ARCDIQMTQSPSSVSASVGDRVTITCRASQGIS------SALAWYQQKPGKPAKLL
IY----A--AS---SLQSGVPSRFSGSGS--GTDYTLT------ISSLQPEDFATYYCQQ
YNSVP--
>V95RF-ABGA01285649.1-igkv |(12602, 12902)|2.76311525692|(0.962,0.961,0.872)|1
----ARCDIQMTQSPSSLSASVGDRVTITCRASQGIS------DDLAWHQQKPGKAPKLL
IY----A--AS---SLQSGVPSRFSGSES--GTEFTLT------ISSLQPEDFATYYCQQ
YNSYP--
>V99RF-ABGA01290201.1-trgv |(11173, 11486)|2.51699862631|(0.933,0.806,0.861)|1
----SQKSSNLEGRTKSVTRPTGSSAEITCDLPGE-----S-TVYIHWYLHQEGKAPQRL
LYYDSYN--SRV-VLESGISPGKYDTYGST-RKNLRLI------LRNLIENDSGVYYCAI
WD-----
>V100RF-ABGA01290201.1-trgv |(15529, 15842)|2.53720731855|(0.969,0.877,0.815)|1
----SQKSSNLEGGTKSVTRPTRSSAEITCDLTVT-----N-AFYIHWYLHQEGKAPQRL
LYYDVSN--SRD-VLESGLGPGKYYTHTPR-WWSWILI------LRNLIENDSGVYYCAT
WY-----
>V101RF-ABGA01290202.1-trgv |(2218, 2531)|2.62702591492|(0.971,0.877,0.861)|1
----SQKSSNLEGGTKSVTRPTRSSAEITCDLTVT-----N-AFYIHWYLHQEGKAPQRL
LYYDVST--ARD-VLESGLSPGKYYTHTPR-RWSWILR------LQNLIENDSGVYYCAT
WD-----
>V104RF-ABGA01301078.1-trbv |(8868, 9168)|2.71076093375|(0.940,0.930,0.864)|1
-----HTGAGVSQSPRYKVTKRGQDVALRCDPISG-------HDYLYWYQQALGQGPEFL
TYFQND---VQL--DKSGMPSDRFSAEGLE-GSISTLK------IQRTEQGDSAVYLCAS
SL-----
>V107RF-ABGA01301083.1-trbv |(1589, 1880)|2.81073453214|(0.966,0.951,0.908)|1
-------NAGVTQTPKFRILKTGQSMTLQCAQDMN-------HNYMYWYRRDPGMGLKLI
YYLVAAG--T----TDKGEVPDGYSVSRST-TEDFPLT------LESAAPSQTSVYFCAS
SY-----
>V108RF-ABGA01301086.1-trbv |(3670, 3966)|2.73035827888|(0.954,0.869,0.937)|1
-----PVDAGVTQSPTHLIKTRGQQVTLRCSPISG-------HKSVSWYQQALGQGPQFI
FEYYEKE---ER--GR-GNFPDRFSARQFP-NYSSELN------VNALLLGDSALYLCAS
SL-----
>V109RF-ABGA01301086.1-trbv |(10960, 11257)|2.5209619193|(0.956,0.808,0.870)|1
-----PMNAGVTQTPKFQVLKTGQSMTLQCAQDMN-------HDYMSWYRQDPGIGLRLI
HYSVAAG--I----TEKGETPSGYNVSRSN-TEDFPLR------LESAAPSQTSVYFCAS
SY-----
>V110RF-ABGA01301086.1-trbv |(15590, 15890)|2.52361758657|(0.844,0.858,0.824)|1
-----HTGAGVSQSPRYKVTKRGQDVALRCDPISG-------HVSLFWYQQALGQGPELL
TYFQNE---VQL--HKSGLPSDRFFAERPE-GSICTLK------IQRTQQEDSAMYLCAS
SL-----
>V111RF-ABGA01313761.1-ighv |(1090, 1396)|2.97591252616|(0.999,0.995,0.983)|1
----VLSQVQLQE-SGPGLVKPSETLSLTCAVSGGSI-S---GYYWSWIRQPPGKGLEWI
GYIYSS---GST--NYNPSLKSRVTVSVDTSKNQFSLK------LSSVTAADTAVYYCAR
-------
>V115RF-ABGA01318850.1-igkv |(776, 1076)|2.95164947362|(0.996,0.963,0.997)|1
----SRCDIQMTQSPSSVSASVGDRVTITCQASQGVS------NALAWYQQKPGKTPKLL
IY----D--AT---TLQSGVPSRFSGSGS--GTDYTLT------ISSLQPEDFATYYCQQ
YNSYP--
>V117RF-ABGA01321409.1-igkv |(1894, 2185)|2.96485291224|(0.998,0.970,1.000)|1
-------DIQMTQSPSSVSASVGDRVTITCRASQSIS------SWLAWYQQKPGKAPKLL
IY----K--AS---NLQSGVPSRFSGSGS--GTDFTLT------ISSLQPEDFATYYCQQ
YSSTP--
>V118RF-ABGA01321410.1-igkv |(12114, 12400)|2.7912557322|(0.992,0.967,0.882)|1
--------IVMTQSPATLSVSPGERGTISCRASQSVS------NYLAWYQQKPGQSPRLL
IY----R--AS---NRATGIPARFSGSGS--GTDFTLT------ISSVEPEDFAVYYCQQ
YNTG---
>V119RF-ABGA01335280.1-iglv |(1203, 1509)|2.66227371523|(0.850,0.927,0.942)|1
-----DSQTVVTQ-EPSFSVSPGGTVTLTCGLSSG---SVSTSYYPSWYQQTPGQALRML
IY----S--TN---TRTSGVPDCFSGSIL--GNKAALT------ITGAQADDESDYYCVL
YMGSGI-
>V120RF-ABGA01342015.1-igkv |(1575, 1875)|2.9373410539|(0.999,0.984,0.961)|1
----TRCDIQMTQSPSSLSASVGDRVTITCRASQSIS------NYLAWYQQKPGKVPKLL
IY----A--AS---TLQSGVPSRFSGSGS--GTDFTLT------ISSLQPEDVATYYCQK
HNSAP--
>V121RF-ABGA01356721.1-igkv |(4236, 4536)|2.99180001921|(1.000,0.993,0.999)|1
----SRCDIQMTQSPSSLSASVGDRVTITCRASQSIS------SWLAWYQQKPGKAPKLL
IY----A--AS---SLQSGVPSRFSGSGS--GTDFTLT------ISSLQPEDFATYYCQQ
HNSYP--
>V123RF-ABGA01356724.1-igkv |(802, 1093)|2.9869000027|(0.998,0.994,0.995)|1
-------DIQMTQSPSSVSASVGDRVTITCRASQGIS------NYLNWYQQKPGKAPKLL
IY----A--AS---SLQSGVPSRFSGSGS--GTDFTLT------ISSLQPEDFATYYCQH
FNSYP--
>V124RF-ABGA01356726.1-igkv |(7542, 7842)|2.84316854597|(0.995,0.897,0.989)|1
----TTGEIVLTQSPATLSLSPGERATVSCRASQSVS------NYLAWYQQKPGQSPRLL
IY----D--AS---NRATGIPARFSGSGS--GTDFTLT------ISSLEPEDFAVYYCQQ
YNNQT--
>V125RF-ABGA01356729.1-igkv |(273, 573)|2.95910611876|(1.000,0.980,0.982)|1
----ARCDIQMTQSPSSVSASVGDRVTITCRASQGIS------SYLAWYQQKPGKAPKLL
IY----A--AS---SLQSGVPSRFSGSGS--GTEFTLT------ISSLQPEDFATYYCMQ
HNSYP--
>V128RF-ABGA01384193.1-ighv |(10967, 11276)|2.9643601679|(0.991,0.995,0.979)|1
----VQCEVQLVE-SGGGLVQPGGSLRLSCAASGFTF-S---SYGMNWVRQAPGKGLEWV
SYISGD-S-SYI--NYADSVKGRFTISRDNAKNSLYLR------MNSLRAEDTAVYYCVK
-------
>V129RF-ABGA01386446.1-trav |(520, 807)|2.81964192834|(0.923,0.961,0.943)|1
-----VNSQQGEEDPQALSIQEGENATMNCSYKT------S-INNLQWYRQNSGRGLVHL
ILIRSNE--RE---KHSGRLRVTLDTS----KKSSSLL------ITASRAADTASYFCAT
D------
>V130RF-ABGA01386446.1-trav |(6159, 6450)|2.55289032028|(0.817,0.914,0.870)|1
----RTNGDPVTQTEGPVTLPERAALTLNCTYQSS-----YS-AFLFWYVQYLNKEPELL
LRSS-E---NQE--TDSRGFQASHVKS----DSSFHLE------KPSVQLSDSAVYYCVL
R------
>V131RF-ABGA01386446.1-trdv |(9538, 9841)|2.13575541656|(0.771,0.754,0.660)|1
----SSMAQKVTQAQAAISVVEKEEVTLDCVYETR-----DATYYLFWYKQPSSGELVFL
IRQNSFN--EQN--EVNGRYSWNFQKS----TSSFNLT------ITASQVMDSAVYFCAL
SE-----
>V134RF-ABGA01387831.1-trav |(4904, 5207)|2.47735577262|(0.891,0.738,0.953)|1
----PGIAQKITQTLPAMFVQEKEAVTLDCTYDTS-----DQSYGLFWYKQPSSGEMILL
IYQGSYD--KQN--ATEGRYSLNFQKA----RKSANLV------ISASQLGDSAMYFCAM
KE-----
>V135RF-ABGA01387833.1-trav |(6325, 6619)|2.62360011823|(0.851,0.893,0.894)|1
----RTHGDSVTQMEGPVTLSEEAFLTINCTYTAT-----GY-PSLFWYVQYPGEGLQLL
LKATKA---DDK--GSNKGFEATYHKE----TTSFHLE------KDSVRESDSGVYFCAL
S------
>V136RF-ABGA01387833.1-trav |(37695, 37988)|2.6716747016|(0.870,0.873,0.962)|1
---VWCQQKEVEQNPGPLSVPEGAIASLNCTYSNS-----A-FQYFMWYRQYSRKGPELL
IYIYSSG--NK----QDGRFTAQVDTS----GKYMSLF------IRDSQPSDSATYLCAM
S------
>V138RF-ABGA01394062.1-igkv |(9765, 10067)|2.70425564014|(0.977,0.826,0.989)|1
----SSAEIVMTQTPLSLSITPGEPASISCRSSQSLLH-SDGNTYLHWYLQKPGQPPQLL
IY----E--VS---NRFSGVPDRFSGSGS--GTDFTLK------ISRVEAEDVGVYYCMQ
D------
>V142RF-ABGA01394068.1-igkv |(3664, 3964)|2.99186400565|(1.000,0.995,0.997)|1
----SRCDIQMTQSPSSVSASVGDRVTITCRASQGIS------NYLAWYQQKPGKAPKLL
IY----Y--AS---SLQSGVPSRFSGSGS--GTDYTLT------ISSLQPEDFATYYCQQ
YNSYP--
>V143RF-ABGA01394071.1-igkv |(1743, 2043)|2.95791054075|(0.974,0.991,0.996)|1
----SRCDIQMTQSPSSLSASVGDRVTITCQASQGIS------NALAWYQQKPGKTTKLL
IY----R--AS---SLQSGVPSSFSGSGS--GTDFTLT------ISSLQPEDFATYYCQQ
YYSDP--
>V150RF-ABGA01083932.1-trav |(371, 664)|2.62748244609|(0.930,0.845,0.888)|-1
----VSRGESVRPHLSTLGVQEGDNSVINCAYSDS-----A-SDYFIWYKQESGKGPQFI
IDIRSNM--DK---RQGQRVTVLLNKT----VKHLSLQ------IAATQPGDSAVYFCAE
N------
>V151RF-ABGA01083934.1-trav |(495, 792)|2.64827515488|(0.959,0.877,0.870)|-1
----GTRAQSVTQLDSHVSVSEGALVLLRCNYSSS-----VS-PYLFWYVQYPNQGLQLL
LKYTSGT--TLV--KGINGFEAEFKKS----ETSFHLT------KPSAHVSDTAQYFCAV
S------
>V152RF-ABGA01083937.1-trav |(4214, 4504)|2.82183763492|(0.931,0.941,0.952)|-1
-----VNGENVEQHPSTLSVQEGDSSVIKCTYSDS-----A-SNYFPWYKQEVGKGPQFI
IDIRSNM--GE---KKDQRITVILNKT----AKHFSLH------ITETQPGDSAVYFCAA
S------
>V154RF-ABGA01083939.1-trav |(4457, 4751)|2.89539396717|(0.983,0.991,0.932)|-1
----GINGDSVVQTEGQVLLSEGDSLIVNCSYETT-----QY-PSLFWYVQYPGEGPQLL
LKAMKA---NDK--GRNKGFEATYRKE----TTSFHLE------KDSVQESDSAVYFCAL
S------
>V155RF-ABGA01083939.1-trav |(18067, 18360)|2.66212655271|(0.856,0.893,0.965)|-1
----GSGKNQVEQSPQSLIILEGKNCTLQCNYTVS-----P-FSNLRWYKQDTGRGPVSL
TIMTFSE--NT---KSNGRYTATLDAD----TKQSSLH------ITASQLSDSASYICVV
S------
>V156RF-ABGA01083939.1-trav |(34050, 34338)|2.65887407967|(0.919,0.827,0.950)|-1
---VWSQQKEVEQDPGPFNVPEGATVAFNCTYSNS-----A-SQSFFWYRQDCRKEPKLL
MSVYSSG--N-----ENGRFTAQLNRA----SQYISLL------IRDSQLSDSATYLCAV
-------
>V157RF-ABGA01083939.1-trav |(39521, 39818)|2.41693970605|(0.910,0.783,0.819)|-1
----GTRAQSVTQLDSHVPVSEGTRVLLRCNYSSS-----YS-PSLFWYVQHPNQGLQLL
LKYLSGP--TLV--KGINGFEAEFKKS----ETSFHLT------KSSAHVSDAAEYFCAM
S------
>V158RF-ABGA01113129.1-trav |(4972, 5260)|2.62487617092|(0.882,0.832,0.930)|-1
-----VKSQKIEQNSEALNIQEGKTATLTCNYTNY-----S-PTYLQWYRQDPGRGPVFL
LLIRENE--KE---KRKERLKVSFDTT----LKQSLFH------ITASQPADSATYFCAL
-------
>V159RF-ABGA01113130.1-trav |(6720, 7010)|2.76714740021|(0.907,0.950,0.918)|-1
----MSRGEDVEQT-LFLSVQEGDSSVINCTYTDS-----S-STYLYWYKQEPGAGLQLL
TYIFSNM--DL---KQDQRLTVLLNKK----DKHLSLR------IADTQTGDSAIYFCAE
H------
>V160RF-ABGA01113133.1-trav |(15271, 15560)|2.50626398197|(0.892,0.764,0.916)|-1
--------QSVAQPEDEVTVAEGNPLTVKCTYSVS-----GN-PYLFWYIQYPNEGLQFL
LKYITGD--NLV--KGSYGFEAEFNKS----QTSFHLK------KPSALVSDSALYFCAV
RD-----
>V161RF-ABGA01132346.1-trgv |(695, 1008)|2.58470018781|(0.961,0.850,0.861)|-1
----SQKSSNLEGGTKSVTRPTRSSAEITCDLTVT-----N-ALYIHWYLHQEGKAPQRL
LYYDVST--ARD-VLESGLSPGKYYTHTPR-RWSWILR------LQNLIENDSGVYYCAT
WD-----
>V164RF-ABGA01161530.1-igkv |(226, 526)|2.96461205453|(0.984,0.993,0.988)|-1
----IRCDIQMTQSPSSLSASVGDRVTITCRASQGIS------NYLNWYQQKPGKAPKLL
IY----R--AS---NLQTGVPSGFSGSGS--GTDFTLT------ISSLQPEDIATYYCQQ
YDNLP--
>V166RF-ABGA01180641.1-igkv |(2646, 2946)|2.89958870068|(0.964,0.956,0.981)|-1
----ARCDIQMTQSPSSVSASVGDRVTITCRASQSIS------SWLAWYQKKPGKAPKLL
IY----K--AS---SLQSGVPSRFSGSGS--GTEFTLT------ISSLQPEDFATYYCTQ
HNSYS--
>V167RF-ABGA01180644.1-igkv |(8050, 8350)|2.95695304822|(0.997,0.981,0.981)|-1
----ARGDIQMTQSPSSLSASVGDRVTITCRASQSIS------SYLAWYQQKPGKAPKPL
IY----A--AS---NLQSGVPSRFSGSGS--GTEFTLT------ISSLQPEDFATYYCQQ
YKSDP--
>V168RF-ABGA01180644.1-igkv |(24182, 24473)|2.88173242436|(0.960,0.974,0.949)|-1
-------DIQMTQSPSSVSASVGDRVTISCRASQSIS------SWLAWYQKKPGKAPKLL
IY----K--AS---SLQSGVPSRFSGSGS--GTEFTLT------ISSLQPEDFATYYCTQ
HNSYP--
>V170RF-ABGA01203420.1-ighv |(3238, 3560)|2.96179201242|(0.988,0.992,0.982)|-1
----VQCEVQLVE-SGGGLVQPGGSLRLSCAASGFTV-S---SNEMSWIRQAPGKGLEWV
STISRG---GST--YYTDSVKGRFTISRDNSKNTLYLQ------MNSLRVEDTAVYYCAR
DTVKG--
>V172RF-ABGA01223433.1-trbv |(4452, 4749)|2.70555154488|(0.970,0.899,0.885)|-1
-----PVNAGVTQTPKFHVLKTGQSMTLQCAQDMN-------HDYMSWYRQDPGMGLRLI
HYSAGAG--I----TDKGEVPNGYNVSRLN-TEDFQLR------LESAAPSQTSVYFCAS
SY-----
>V173RF-ABGA01225869.1-trbv |(7999, 8296)|2.51607609839|(0.882,0.833,0.824)|-1
-----PLEAQVTQNPRYLITVTGKKLKVTCSQNMN-------HEYMSWYRQDPGLGLRQI
YYSMNVE--V----VDKGDVPEGYNVSRKE-KRNFPLI------LESPSPNQTSLYFCAS
SL-----
>V177RF-ABGA01252206.1-iglv |(13174, 13484)|2.7085913698|(0.904,0.879,0.931)|-1
----SWDQSALIQ-PPSMSGSPGQSVTISCTGTSS---DVGGYNYVSWYQQHPGTAPKLM
IY----A--VS---NQPSGVPNRFSGSKS--GNTASLT------ISGLQAEDEADYYCSS
YAGSNN-
>V180RF-ABGA01252215.1-iglv |(9236, 9539)|2.71325628837|(0.927,0.849,0.968)|-1
----SEASYELTQ-PPSVSVSPGQTARITCSG------DALPKKYAYWFQQKSGQAPVLV
IY----K--DS---KRPSGIPERFSGSSS--GTMATLT------ISGAQVEDEADYYCYS
TDSSGNH
>V181RF-ABGA01252216.1-iglv |(11892, 12202)|2.63821046559|(0.877,0.864,0.900)|-1
----SWAQSALTQ-PRSVSGSPGQSVTISCTGTSS---DIGGYNAVSWHQQHPGKAPKLM
IY----D--VS---NRPSGVPNRFSGSKS--GNMASLT------ISGLQAEDEADYYCSS
YAGSYT-
>V182RF-ABGA01252218.1-iglv |(480, 780)|2.84308808336|(0.971,0.914,0.971)|-1
----SVTSYELTQ-PHSVSVATAQTARITCGG------NNIGSKAVHWYQQKPGQAPVLV
IY----D--DS---NQPSGIPERFSGSNS--GNTATLT------ISGAQAGDEADYYCQV
WDSSKH-
>V183RF-ABGA01252219.1-iglv |(2097, 2400)|2.74978832537|(0.957,0.920,0.894)|-1
----SATSYELTQ-PPSVSVAPRQTARITCGG------NNIGSKSVHWYQQKPGQAPVLV
IY----G--DS---NRPSGISERFSGSNS--GNTATLT------ISRVEAGDEAVYYCQV
WDSSSDY
>V184RF-ABGA01252219.1-iglv |(9992, 10295)|2.77912796924|(0.956,0.920,0.915)|-1
----SATSYELTQ-PPSVSVAPRQTARITCGG------NNIGSKSVHWYQQKPGQAPVLV
IY----G--DS---DRPSGISERFSGSNS--GNTATLT------ISRVEAGDEAVYYCQV
WDSSSDY
>V185RF-ABGA01252219.1-iglv |(17960, 18263)|2.6542773907|(0.948,0.816,0.958)|-1
----SVVSSELTQ-DPAVSVTLGQTVKITCQG------DSLRSYYASWYQQKPGQAPVLV
IY----G--NN---NRPSGIPDRFSGASS--GNTASLT------ITGAQAEDEADYYCNS
WDGSGNH
>V186RF-ABGA01252219.1-iglv |(34167, 34477)|2.93706097516|(0.990,0.976,0.973)|-1
----SWAQSALTQ-PPSVSGSPGQSITISCTGTSS---DVGGYNYVSWYQQHPGTAPKLM
IY----D--VS---KRPSGVPDRFSGSKS--GNTASLT------ISGLQTEDEADYYCSS
YRSGDT-
>V187RF-ABGA01252219.1-iglv |(46613, 46923)|2.91816605151|(0.997,0.946,0.986)|-1
----SWAQSALTQ-PASVSGSPGQSITISCTGTSS---DVGGYNYVSWYQQHPGKAPKLM
IY----D--VS---KRPSGVPDRFSGSKS--GNTASLT------ISGLQAEDEADYYCSS
YRSGST-
>V188RF-ABGA01252219.1-iglv |(70767, 71077)|2.81945042313|(0.993,0.938,0.921)|-1
----SWAQSALTQ-PPSVSGSPGQSITISCTGTSS---DIGGYNAVSWYQQHPGKAPKLM
IY----E--VS---KRPSGVPDRFSGSKS--GNTASLT------ISGLQAEDEADYYCSS
YRSGGT-
>V194RF-ABGA01252241.1-iglv |(8984, 9293)|2.65573742105|(0.944,0.817,0.958)|-1
----SWAQSVLTQ-PPSASGTPGQRVTISCSGSSS---NIG-SNYVYWYQQFPGMAPKHL
IY----D--NN---QQPSGVPDRFSGSKS--GTSASLA------ISGLRSKDEADYYCAA
WDNSLSG
>V196RF-ABGA01252243.1-iglv |(44201, 44510)|2.6405430066|(0.845,0.898,0.962)|-1
----SWAQSVLTR-PPSVSAAPGQKVTISCSGSS----SNIGNYAVSWYQQLPGTAPKLL
IY----E--NN---KRPSGISDRFSGSKS--GTSATLG------ITGLQTGDEADYYCSA
WDSSLSA
>V197RF-ABGA01252243.1-iglv |(49802, 50111)|2.65070124383|(0.974,0.830,0.933)|-1
----SWAQSVLTQ-PPSASGTPGQRVTISCSGSSS---NIG-SNYVYWYQQFPGMAPKLL
IY----D--NN---QRPSGVPDRFSGSKS--GTSASLA------ISGLRSEDEADYYCAA
LDNSLSG
>V200RF-ABGA01252248.1-iglv |(12457, 12769)|2.64627887443|(0.940,0.825,0.933)|-1
----SWAEVVFTQ-PHSVSGSPGQTVTISCTRSSG---SID-NRYVYWYQQRPGSAPTTV
IY----D--DN---QRPSGVPDRFSGSIDSSSNSASLT------ISGLKSEDEADYYCQS
ANDSHN-
>V206RF-ABGA01257772.1-igkv |(3885, 4185)|2.97832013632|(0.987,0.994,0.998)|-1
----ARCAIQMTQSPSSLSASVGDRVTITCRASQGIS------NELSWYQQKPGQAPTLL
IY----A--AS---SLQSGVPSRFSGSGS--GTDFTLT------ISSLQPEDVATYYCLQ
DYTTP--
>V208RF-ABGA01259417.1-trbv |(2271, 2571)|2.70796782636|(0.913,0.974,0.851)|-1
-----HADTGVSQDPRHKITKRGQNVTFRCDPISE-------HNRLYWYRQTLGQGPEFL
TYFQNEA---QQ--EKSGLFSDQFSAERPK-GSFSTLK------IQRTEQGDSAMYLCAS
SL-----
>V209RF-ABGA01276916.1-igkv |(1327, 1627)|2.91377652089|(0.993,0.956,0.972)|-1
----ARCDIQMTQSPSSVSASVGDRVTITCRASQSIS------SWLAWYQQKPGKAPKLL
IY----K--AS---NLQSGVPSRFSGSGS--GTDFTLT------ISSLQPEDFATYYCIQ
HSSTP--
>V213RF-ABGA01277802.1-trbv |(6147, 6443)|2.71962645851|(0.922,0.871,0.938)|-1
-----PVDSGVTQTPKHLITATGQRVTLRCSPRSG-------DLSVYWYQQSLDQGLQFL
IQYYNGE---ER--EK-GNILERFSAQQFP-DLHSELN------LSSLELGDSALYFCAS
SV-----
>V216RF-ABGA01277808.1-trbv |(1866, 2166)|2.56495295177|(0.915,0.964,0.773)|-1
-----HTGAGVSQSPSNKVTEKGKDVELRCDPISG-------HTALYWYRQSLGQGLEFL
IYFQGN---SAP--DESGLPSDRFYAERSG-GSISTLK------IQHTQQEDSAMYLCAS
SL-----
>V217RF-ABGA01277809.1-trbv |(3151, 3448)|2.54196334765|(0.921,0.942,0.769)|-1
-----PLDTAVSQTPKYLVTQMGKKESLKCEQNLG-------HDAMYWYKQDSKKFLKIM
FIYNNK---EPI--LNETV-PNRFSPNSPD-KAHLQLH------ISSLELGDSAVYFCAS
SQ-----
>V218RF-ABGA01277809.1-trbv |(14738, 15029)|2.68402955788|(0.966,0.917,0.857)|-1
-------NAGVTQIPKFRVLKTGQSMTLQCAQDMN-------HDYMYWYRQDPGMGLRLI
HYSAGEG--T----TTKGEVPDGYNVSRLK-KQNFLLG------LESAAPSQTSVYFCAS
SY-----
>V219RF-ABGA01277810.1-trbv |(2890, 3197)|2.77725275647|(0.931,0.981,0.884)|-1
-----PVNAGVTQTPKFQVLKTGQSMILQCAQDMN-------HDYMYWYRQDPGMGLRLI
HYSLDVG--T----TDKGEVPDGYNVSRLN-IQNFLLR------LESAAPSQTSVYFCAS
SEATV--
>V220RF-ABGA01277810.1-trbv |(5526, 5817)|2.67046330217|(0.951,0.931,0.839)|-1
-------NAGVTQTPKFRVLKTGQSITLQCAQDMN-------HNSMYWYRQDPGMGLRLI
HYSVGAH--S----TEKGEVPDGYNVSRLN-TQNFLLR------LKSAAPSQTSVYFCAS
SE-----
>V222RF-ABGA01277815.1-trbv |(5061, 5368)|2.69833138847|(0.946,0.864,0.918)|-1
-----PVNAGVTQTPKFQVLKTGQSMTLQCAQDMN-------YDNMYWYRQDPGMGLKLI
HYSVGEG--T----TDKGEVPDGYNVSRLN-RQNFLLR------LESAAPSQTSVYFCAS
GYSTA--
>V237RF-ABGA01321068.1-trav |(6457, 6745)|2.42721611554|(0.821,0.744,0.959)|-1
----LSGELKVGQNPLFLSTQEGKNYTIYCNYSTT-------SDRLYWYRQDPGKSLESL
FVLLSNG--AV---KQEGRLMASLDTK----ARLSTLH------ITAAVHDLSATYFCAV
-------
>V238RF-ABGA01321070.1-trav |(796, 1096)|2.7190132749|(0.953,0.954,0.852)|-1
----FSMAQTVTQSQPEMSVQEAETVTLSCTYDTS-----ESDYYLFWYKQPPSRQMILV
IRQEAYK--QQN--ATENRFSVNFQKA----AKSFSLK------ISDSQLGDAAMYFCAY
R------
>V239RF-ABGA01321072.1-trdv |(3234, 3535)|2.12625740098|(0.734,0.766,0.655)|-1
----SSMAQTVTQSQPEMSVQEAETVTLSCTYDTS-----ESNYYLFWYKQPPSRQMILV
IRQEAYK--QQN--ATENRFSVNFQKA----VKSFSLK------ISDSQLGDTAMYFCAF
M------
>V3RF-ABDC01165520.1-igkv |(7469, 7769)|2.78329117012|(0.907,0.954,0.934)|1
----ARCDIQMTQSPSSLAASVGDTVTISCRASQGIS------SWLSWHQQKPGKPPKTL
IN----K--AS---NLESGVPSRFSGSGS--GTDFTLT------IKGLQPEDFATYYCQQ
YDSSP--
>V4RF-ABDC01231268.1-ighv |(5361, 5667)|2.9509635143|(0.969,0.988,0.999)|1
----VQCDVQLLE-SGGGLVQPGGSLRLSCAASGFTF-S---SYYMHWVRQAPGKGLEWV
STISS---GGST--YYADAVKGRFTISRDNGKSSLYLQ------MNSLKAEDTAVYYCAR
-------
>V6RF-ABDC01231272.1-ighv |(378, 697)|2.91994052476|(0.980,0.977,0.964)|1
----VQCEVQLVE-SGGGLVQPGGSLRLSCVASGFTL-T---SYGMNWVRQAPGKGLEWI
SYIYS----SST--SYADSVKGRFTISTDNGKNSLYLQ------MNSLRAEDTAMYYCAR
HTVRG--
>V7RF-ABDC01231274.1-ighv |(17, 332)|2.9136312831|(0.988,0.988,0.945)|1
----VQCEVQLVE-SGGGLAQPGGSLRLSCAASGFTF-S---SYYMYWVRQAPGKGLEWV
GFVRNKANGGTA--EYAASVKGRFTISRDDSKSTAYLQ------MNSLRAEDTALYYCAR
-------
>V8RF-ABDC01231277.1-ighv |(694, 1003)|2.95920030738|(0.992,0.978,0.990)|1
----VQCEVQLAE-SGGGLVQPGGSLRLSCAASGFTF-S---NYYMYWVRQAPGKGLEWI
STISNS--GSST--GYADSVKGRFTTSRDNSKNMLYLQ------MNSLKAEDTALYYCAR
-------
>V9RF-ABDC01282056.1-ighv |(476, 782)|2.87393377978|(0.974,1.000,0.916)|1
----VQCEVQLVE-SGGGLVQPGGSLKLSCAASGFTF-S---SYDMHWVRQAPGKGLEWV
SVIGI--G-GST--YYADAMKGRFTISRDNGKNMLYLQ------MSSVQAEDTAVYYCTR
-------
>V10RF-ABDC01282057.1-ighv |(6536, 6858)|2.97186400565|(0.990,0.995,0.987)|1
----VQCEVQLVE-SGGGLVQPGGSLRLSCAASGFTF-S---SYWMYWVRQAPGKGLEWV
SRINPD--GGST--NYADAVKGRFTISRDNGKNTLYLQ------MNSLKAEDTAVYYCAR
DTVT---
>V14RF-ABDC01296165.1-iglv |(8050, 8360)|2.75377635195|(0.968,0.903,0.912)|1
----SLANFVLTQ-PSSVSGSPGQKVTISCTRSSG---NIG-SNYVHWYQQRPGSAPTTV
IY----R--DD---KRPSGVPDRFSGSSDSSSNSASLT------ISGLQSEDEADYYCQS
YDASA--
>V18RF-ABDC01314388.1-ighv |(6282, 6597)|2.87845228213|(0.931,0.994,0.978)|1
----VQCEVQLVE-SGGGLVQPGGSLKLSCAASGLTF-S---DYWMSWIRQAPGKGLEWA
GLNRSKAYGGIA--EYAASVKDRFTISRDDSKSTAYLQ------MNSLKAKDTALYYCVR
-------
>V20RF-ABDC01318810.1-iglv |(15156, 15463)|2.74432013632|(0.909,0.920,0.916)|1
----SWAQSALTQ-PPSVSGAPGETVTISCSGSSS---NIG-GYDANWYQQLPGTAPKLL
IY----G--NS---NRPSGVPARFSGSKS--GSSASLT------IAGLQAEDEGDYYCSS
WDSSLS-
>V24RF-ABDC01342328.1-iglv |(12642, 12952)|2.72919069344|(0.925,0.918,0.891)|1
----SLANFFLTQ-PSSVSGSPGQKVTISCTRSSG---NIG-SNYVHWYQQRPGSAPSTV
IY----E--YN---KRPSGVPDRFSGSMDSSSNSASLT------ISGLQSEDEADYYCQS
YDGSY--
>V27RF-ABDC01349227.1-iglv |(6289, 6587)|2.67563765192|(0.903,0.902,0.874)|1
-----SVASQVTQ-VPAVSVALGQTARITCQG------DSLSSYYPGWYQQKPSQAPVLV
VY----G--NN---ERPSGIPERFSGSKS--GNTATLT------ISGAQVEDEADYYCGS
YAGSGT-
>V29RF-ABDC01349230.1-iglv |(865, 1165)|2.65380255864|(0.899,0.879,0.879)|1
-----SVASQLTQ-VPAVSVALGQTASITCQG------DGLSSDYANWYQQKPGQAPVLL
IY----G--EN---QRPSGIPERFSSSDS--GDTATLT------ISGAQAGDEADYYCQV
WDSENNK
>V34RF-ABDC01351837.1-igkv |(9264, 9579)|2.68572510959|(0.855,0.958,0.949)|1
----SSGDVVMTQTPLSLSVTPGESASISCRASQSIQD-SDGNTYLNWFLQKPGQPPRRL
IH----K--VS---NRDSGVSDGFSGSGS--GTDFTLK------ISRVEAEDVGVYYCMQ
ASYFP--
>V37RF-ABDC01359388.1-iglv |(1496, 1806)|2.85822051637|(0.965,0.925,0.975)|1
----SLANFVLTQ-PSSVSGSPGQKVTVSCTRSSG---NIG-SNYVYWYQQRPGSAPTTV
IY----R--DD---QRPSGVPDRFSGSIDSSSNSASLT------ISGLQSEDEADYYCQS
YDGSA--
>V41RF-ABDC01360666.1-igkv |(4785, 5100)|2.69285230673|(0.968,0.844,0.943)|1
----SSGDIVMTQTPLSLPVTPGESASISCRSSQSLLH-SDGKTYLQWFLQKPGQSPQLL
IY----L--GF---TRASGVPDRFSGSGS--GTDFTLK------ISKVEAEDVGVYYCMQ
TIQFP--
>V46RF-ABDC01373300.1-ighv |(1180, 1499)|2.92151211712|(0.978,0.977,0.967)|1
----VQCEVQLVE-SGGGLVQPGGSLRLSCVASGFTL-T---SYGMNWVRQAPGKGLEWI
SYIYS----SST--SYADSVKGRFTISTDNGKNTLYLQ------MNSLRAEDTAMYYCAR
HTVRG--
>V47RF-ABDC01373301.1-ighv |(8478, 8785)|2.97985201038|(0.991,0.997,0.992)|1
----VQCEVQLVE-SGGGLVQPGGSLRLSCAASGFTF-S---SYYMHWVRQAPGKGLEWV
SRINPD-G-GST--IYADAVKGRFTISRDNSKNSLYLQ------MNSLKAEDTAVYYCA-
-------
>V48RF-ABDC01375549.1-ighv |(174, 483)|2.95964845687|(0.987,1.000,0.974)|1
----VQCEVQLVE-SGGGLVQPGGSLRLSCAASGFTF-S---SYWMNWVRQAPGKGLEWV
ADINGD--GGST--NYADAVKGRFTISRDNAKNSLYLQ------MNSLRAEDTALYYCAT
-------
>V49RF-ABDC01375549.1-ighv |(8525, 8840)|2.85231565319|(0.971,1.000,0.903)|1
----VQCEVQLVE-SGGGLVQPGGSLKLSCVASGFTF-S---DYYMHWVRQAPGKGLEWV
AFIRNKANGGTA--EYAASVKGRFTISRDDSKSTAYLQ------MNSLRTEDTAVYYCER
-------
>V50RF-ABDC01377237.1-ighv |(8637, 8946)|2.9798400105|(0.996,0.990,0.994)|1
----VQCDVQLVE-SGGGLVQPGGSLRLSCAASGFTF-S---SYWMYWVRQAPGKGLEWV
SAISGN--GGST--YYADAVKGRFTISRDNGKNTLYLQ------MNSLKAEDTAVYYCAR
-------
>V51RF-ABDC01377653.1-trav |(1660, 1950)|2.58423336032|(0.894,0.864,0.841)|1
----MSRGEKLEQS-PFLSVQEGDSSVINCTYTET-----T-STYFYWYKQGPREGLQLI
MTIFSYE--DK---KQERRLSVLLNKM----EKHLSLH------ISDTQPADSAVYFCAV
S------
>V53RF-ABDC01379531.1-trav |(895, 1198)|2.35334389257|(0.908,0.701,0.902)|1
----SGMAQKVTQSQPAMWVQEKEAVTLDCTYDTR-----DSTYYLFWYKQPSSGEMILL
IRQDSYN--QQN--ATEGRYSLNFQKA----SKSIKLV------ISASQVGDSAIYFCAL
SE-----
>V54RF-ABDC01379531.1-trav |(6655, 6946)|2.70974188868|(0.880,0.917,0.927)|1
---VRSQQKEVDQTPEFLSVSEGAMASLNCTYSNT-----A-SRYFFWYRQYSGKGPELL
VSIFSTG--DK----QEGRFTAQLNKA----SRYVSLV------IRDSQPSDSATYLCAL
-------
>V56RF-ABDC01384523.1-iglv |(1675, 1975)|2.64753356618|(0.895,0.879,0.876)|1
-----SVASQLTQ-VPAVSVALGQTASITCQG------DGLSSDYANWYQQKPGQAPVLL
IY----G--EN---QRPSGIPERFSSSVS--GDTATLT------ISGAQAGDEADYYCQV
WDSENNK
>V57RF-ABDC01388284.1-trav |(3312, 3602)|2.47175405241|(0.833,0.762,0.950)|1
----VRSQQVVEQTPESLVVSEGTTASLSCTYSDT-----A-SQSFLWYRQYSGKGPELL
MFIYSTG--DK----EEGRFTAQLNKA----SRNVSLL------IRDSQPSDSATYLCAV
S------
>V62RF-ABDC01394567.1-igkv |(5428, 5726)|2.78595064524|(0.889,0.977,0.992)|1
----TRCDIQMTQSPSSVSASPGETVTISCRASQGIN------NNLVWYQHKPGKPPKSL
IY----G--AS---NLYPGVLSRFSGSGS--GTDYSLT------IRGLETDDAATYYCQQ
YNSF---
>V72RF-ABDC01407894.1-ighv |(4990, 5305)|2.92217179879|(0.989,0.999,0.943)|1
----VQCEVQLVE-SGGGLAQPGGSLRLSCAASGFTF-S---DYYMSWVRQAPGKGLEWV
GFIRNKANGGTA--EYAASVKGRFTISRDDSKSTTYLQ------MNSLRAEDTALYYCAR
-------
>V74RF-ABDC01417489.1-ighv |(3793, 4108)|2.92960298148|(0.985,0.999,0.951)|1
----VQCEVQLVE-SGGGLAQPGGSLRLSCAASGFTF-S---DYYMNWVRQAPGKGLEWV
GVIRNKANGGTA--EYAASVKGRFTISRDDSKSTAYLQ------MNSLRAEDTALYYCAR
-------
>V75RF-ABDC01417539.1-iglv |(3342, 3652)|2.74255416232|(0.959,0.941,0.873)|1
----SLANIVLTQ-PSSVSGSPGQKVTLSCTRSSG---DIG-SSYVSWYQQRPGSAPTTV
IY----E--DN---ERPSGVPDRFSGSIDSSSNSASLT------ISALQSEDEADYYCQS
YDDSY--
>V77RF-ABDC01418168.1-iglv |(5505, 5817)|2.67437418995|(0.921,0.901,0.866)|1
----SLANLVLTQ-PSSVSGSPGQKVTISCTRSSG---DIG-DAYVTWYQQRPGSAPTTV
II----G--DD---QRPSRVPDRFSGSIDSSSNSASLT------ISGLQSEDEADYYCQS
YGIRNS-
>V79RF-ABDC01418428.1-trav |(328, 621)|2.62488748934|(0.869,0.848,0.920)|1
----VRGGENVGLHPPTLSVQEGDTSVINCSYSDS-----A-SSYLLWYKQKLGKSPQSI
IDIRSNM--GK---KQKGRFTVFLSKT----AKHLSLH------IAATQPGDSAVYFCAE
S------
>V80RF-ABDC01421861.1-ighv |(7067, 7376)|2.88692102226|(0.938,0.972,0.994)|1
----VQCEVQLLE-SGGGLVQPGGSLRLSCAASGFTF-S---SYYMSWVRQAPRKGLEWV
SYING--DGGYT--NYADAVKGRFTISRDNSKNSLYLQ------MNNLKAEDTAMYYCAR
-------
>V81RF-ABDC01422153.1-iglv |(2569, 2876)|2.76511408413|(0.910,0.929,0.929)|1
----SWAQSALTQ-PPSASGAPGQSVTISCSGSSS---NIG-GNYANWYQQLPGTAPKLL
IY----G--NS---DRPSGVPARFSGSKS--GSSASLT------IAGLQAEDEGDYYCSS
WDDSLS-
>V82RF-ABDC01423814.1-ighv |(3316, 3625)|2.98496800026|(0.995,0.993,0.997)|1
----VQCEVQLVE-SGGGLVQPGGSLRLSCAASGFTF-S---SYAMSWVRQAPGKGLEWV
STISNG--GGST--YYTDAVKGRFTISRDNSKNSLYLQ------MNSLRAEDTALYYCAR
-------
>V90RF-ABDC01442374.1-iglv |(1223, 1533)|2.81522818506|(0.945,0.933,0.938)|1
----SLTNLVLTQ-PNSVSGSPGQKVTISCTRSTG---SIG-GYFVHWYQQRPGSAPTTV
IY----A--DD---QRPSGVPDRFSGSIDSSSNSASLT------ISGLQSEDEADYYCQS
YDDSY--
>V94RF-ABDC01449636.1-iglv |(4939, 5239)|2.65107006276|(0.912,0.874,0.876)|1
-----SVASQLTQ-VPAVSVALGQTARITCQG------DSLSSYYPNWYQQKPGQAPVLL
IY----G--EN---QRPSGIPERFSSSVS--GDTATLT------ISGAQAGDEADYYCQV
WDSENNK
>V95RF-ABDC01454767.1-ighv |(1191, 1500)|2.95964845687|(0.987,1.000,0.974)|1
----VQCEVQLVE-SGGGLVQPGGSLRLSCAASGFTF-S---SYWMNWVRQAPGKGLEWV
ADINGD--GGST--NYADAVKGRFTISRDNAKNSLYLQ------MNSLRAEDTALYYCAT
-------
>V96RF-ABDC01466438.1-iglv |(4568, 4875)|2.76511408413|(0.910,0.929,0.929)|1
----SWAQSALTQ-PPSASGAPGQSVTISCSGSSS---NIG-GNYANWYQQLPGTAPKLL
IY----G--NS---DRPSGVPARFSGSKS--GSSASLT------IAGLQAEDEGDYYCSS
WDDSLS-
>V104RF-ABDC01491653.1-trav |(356, 647)|2.70974188868|(0.880,0.917,0.927)|1
---VRSQQKEVDQTPEFLSVSEGAMASLNCTYSNT-----A-SRYFFWYRQYSGKGPELL
VSIFSTG--DK----QEGRFTAQLNKA----SRYVSLV------IRDSQPSDSATYLCAL
-------
>V106RF-ABDC01497734.1-trdv |(531, 837)|2.1695657599|(0.746,0.674,0.773)|1
----STVAQKVTQVETARSTTVGAVVTLNCQYETSG----GAYFFIFWYKQLPSKEMIFL
LRQGSDL--YNA--KDDQRYSVNFQEE----ANSIDLT------ISALRLEDSAKYFCAL
AE-----
>V110RF-ABDC01522041.1-igkv |(82, 382)|2.78329117012|(0.907,0.954,0.934)|1
----ARCDIQMTQSPSSLAASVGDTVTISCRASQGIS------SWLSWHQQKPGKPPKTL
IN----K--AS---NLESGVPSRFSGSGS--GTDFTLT------IKGLQPEDFATYYCQQ
YDSSP--
>V115RF-ABDC01533415.1-trav |(1221, 1515)|2.83945058716|(0.932,0.971,0.943)|1
----GTDGDSVTQTEGPVTLPEGEALTLNCTYQSN-----YA-AFLFWYVQFQNKEPELL
LKSSSE---TQE--TDGRGFQANNNKS----DSSFHLK------KPSVQLSDSAVYFCAM
R------
>V116RF-ABDC01542818.1-trav |(328, 615)|2.4438103373|(0.833,0.785,0.835)|1
----VSSEDKVVQSPPSMAVHEGDSATLTCNYVVS-----Y-FRSLQWYKQEK-NAPVFL
FTLTSSG--IE---KKSGRFSSILDNK-----ELSTLN------ITATQTGDSAIYFCAV
E------
>V129RF-ABDC01281097.1-trbv |(3192, 3492)|2.51585161002|(0.879,0.786,0.885)|-1
-----HTEPGVIQTPSHQVTKKGQEVILRCDPISG-------HLYFYWYRQISGQKLEFL
VSFYND---NIS--EKSELFTDQFSLKRPK-GSYLALK------IQSTELEDSAMYFCAS
SK-----
>V138RF-ABDC01368601.1-trbv |(2109, 2406)|2.64407169635|(0.916,0.864,0.880)|-1
-----SVTAGVTQTPRFQILKTGQNMTLMCTQDTN-------HDSMYWYRQDPGLGLRLI
HYSVAAG--T----TARGDIPEGYNVSRSS-TETFSLT------MESATPSQTSAYFCAS
SE-----
>V141RF-ABDC01396906.1-ighv |(901, 1210)|2.9375766041|(0.971,0.981,0.987)|-1
----VQCEVQLVE-SGGGLVQPGGSLRLSCAASGFTF-D---YYGMNWVRQAPGKGLEWV
SYISWN--GGST--YYADAVKGRFTISRDNSKNMLYLQ------MNSLRAQDTAVYYCAR
-------
>V145RF-ABDC01425625.1-iglv |(109, 419)|2.78145749281|(0.942,0.935,0.909)|-1
----SLANFVLTQ-PSSVSGSPGQKVTISCTRSSG---NIG-SYYVQWYQQRPGSAPSTV
IY----K--HN---KRPSGVPDRFSGSIDSSSNSASLT------ISGLQSEDEADYYCQS
YDGSY--
>V146RF-ABDC01454736.1-trav |(1674, 1968)|2.71355405101|(0.884,0.955,0.895)|-1
----RTHGNSVTQTEGQVTLSEKAFLHINCTYTST-----GY-PSLFWYVQYPGEGPQLL
LKAATA---NDK--GMNKGFEATYKKE----TTSFHLE------KASVHESDSAVYYCAM
S------
>V147RF-ABDC01455982.1-trbv |(239, 546)|2.6108202031|(0.907,0.907,0.824)|-1
-----HTDAGITQNPRHKITEIGKQVTLSCHQNDN-------HFYMYWYRQDLGHGLRLI
YYSVDAQ--S----TDKEEVAEGYKVSRSN-KEDFLLF------LESATRSQTSVYFCAS
SEYTA--
>V149RF-ABDC01465190.1-iglv |(381, 691)|2.85822051637|(0.965,0.925,0.975)|-1
----SLANFVLTQ-PSSVSGSPGQKVTVSCTRSSG---NIG-SNYVYWYQQRPGSAPTTV
IY----R--DD---QRPSGVPDRFSGSIDSSSNSASLT------ISGLQSEDEADYYCQS
YDGSA--
>V150RF-ABDC01471087.1-ighv |(643, 952)|2.94353356618|(0.981,1.000,0.965)|-1
----VQCEVQLVE-SGGGLVQPGGSLRLSCAASGFTF-S---DYWMNWVRQAPGKGLEWV
AHIRYD-G-SKQ--YYADAVKGRFTISRDNSKNSLYLQ------MNSLRAEDTALYYCAR
-------
>V152RF-ABDC01473376.1-trbv |(205, 505)|2.45537524763|(0.873,0.860,0.767)|-1
-----SYDAKVTQTPGHLIKEKGQKASMDCTPQQG-------HNSLYWYQQSQNKELEFL
VYFENKE---LF--DQTEMHKKRFSSKCPP-DSPCRLE------ILSSEPGDSALYFCAS
SP-----
>V154RF-ABDC01493416.1-ighv |(429, 735)|2.9071530568|(0.948,0.973,0.999)|-1
----VQCDVQLLE-SGGGLVQPGGSLRLSCAASGFTL-S---SYYMHWVRQAPGKGLEWV
STISS---GGST--YYADAVKGRFTISRDNGKSSLYLQ------MNSLKAEDTAVYYCAR
-------
>V158RF-ABDC01540867.1-iglv |(1970, 2280)|2.74331605249|(0.957,0.884,0.927)|-1
----SLANFVLTQ-PSSVSGSPGQKVTISCTRSSG---NIE-SSYVHWYQQRPGSAPTTV
IY----D--DN---ERPSGVPDRFSGSIDSSSNSASLT------ISGLQSEDEADYYCQS
YDASA--
>V159RF-ABDC01560090.1-trbv |(258, 558)|2.7440624075|(0.923,0.963,0.874)|-1
-----SMDTEVTQSPRYLVKGKEQKTKMDCVPKKG-------HSYVYWYQKKLEEGLKFL
VYLQDED---II--EKEEIINNRFSAQCPK-NSPCILE------IQSTESGDSALYFCAS
SQ-----
>V162RF-ABDC01624510.1-iglv |(99, 409)|2.74331605249|(0.957,0.884,0.927)|-1
----SLANFVLTQ-PSSVSGSPGQKVTISCTRSSG---NIE-SSYVHWYQQRPGSAPTTV
IY----D--DN---ERPSGVPDRFSGSIDSSSNSASLT------ISGLQSEDEADYYCQS
YDASA--
>V0RF-JABR01013263.1-trbv |(179, 479)|2.59697240396|(0.911,0.872,0.840)|1
-----HMGAGVSQSPRYKVTKKGQDVVLSCDPISG-------HEALYWYQQALGQGPKFL
TYFNYE---AQP--DKSGLPNDRFSAERPK-GSVSTLT------IQRTEQRDSAVYLCAS
SL-----
>V4RF-JABR01016432.1-iglv |(31781, 32090)|2.798154612|(0.982,0.883,0.972)|1
----SWAQSVLTQ-PPSASGPPGQSVTISCSGSSS---NIG-SNYVYWYQQLSGKAPKLL
IY----D--NN---KRPSGVPDRFSGSKS--GTSASLA------ISGLQTEDEADYYCAA
WDDSLSG
>V6RF-JABR01043229.1-iglv |(142541, 142835)|2.6594498032|(0.850,0.930,0.930)|1
---------VVTQ-EPLLSVSSGGTVAITCGLSSG---PVSTSNYPSWYQQTPGQAPRTL
IY----S--TN---TRPSGVPDRFSGSIL--GNKAALT------ITGAEADDESDYYCVL
YMGSGI-
>V9RF-JABR01052882.1-trgv |(88181, 88494)|2.34274449547|(0.953,0.762,0.826)|1
----SQKSSNLEGRTKSVTRPTGSSAEITCDFSGD-----S-NFYIHWYLHQEGKAPQRL
LYYDVSN--SRD-VLESGLSLGKYYTHTRT-RWSWILI------LRNLIENDSGVYYCAT
WD-----
>V11RF-JABR01059011.1-ighv |(294, 609)|2.99296000066|(0.997,1.000,0.996)|1
----VQCEVQLVE-SGGGLVQPGGSLRLSCAASGFTF-S---NYHMSWVRQAPGKGLEWV
GFIRNKASGGTA--EYAASVKGRFTISRDDSKSITYLQ------MNSLKTEDTAVYYCAR
-------
>V17RF-JABR01066987.1-ighv |(11840, 12146)|2.94880001921|(0.981,0.988,0.980)|1
----VQCEVQLTE-SGGGLVQPDGSLRLSCAASGFTF-S---SYAMQWVHQAPGKGLEWV
SAIGP--G-GDT--YYADAVKGRFTISRDNTKNSLYLQ------MNSLRAEDTAVYYCAR
-------
>V21RF-JABR01070187.1-ighv |(14433, 14739)|2.89585385296|(0.983,0.990,0.933)|1
----VQCEMQLVE-SGGGLVQPGGSLRLSCAASGFTF-S---SYDMHWVRQAPGKGLEWV
SAISI--G-GGT--YYPDSVKGRFTISRDNAKNSLYLQ------MNSLRAEDMAVYYCAR
-------
>V24RF-JABR01074704.1-ighv |(2136, 2448)|2.95579201242|(0.986,0.990,0.980)|1
----VLSQVQLQE-SGPGLVKPSETLSLTCAVSGGSI-S-S-YNYWSWIRQPPGKGLEWI
GHIYGN-S-AST--NYNPSLKSRVTISKDTSKNQFSLK------LSSVTAADTAVYYCAR
-------
>V26RF-JABR01076259.1-igkv |(8845, 9160)|2.78925764374|(0.965,0.880,0.973)|1
----SSGDIVMTQTPLSLPITVGETASISCRSSQSLLS-SNGYNYLSWYLQKPGQSLQLL
IY----Y--GS---NRASGVPDRFSGSGS--GTDFTLK------ISRVEAEDIGVYYCMQ
TLQTP--
>V31RF-JABR01076261.1-igkv |(78882, 79179)|2.69724386056|(0.982,0.826,0.982)|1
-----RCDIQMTQSPSSLSASVGDRVTITCRASQSFS------SSLAWYQQKLGKAPKLL
IY----G--AS---SLQSGIPSRFSGSKS--GTDFTLT------ISSLQPEDVAAYYCQQ
YYSYP--
>V33RF-JABR01076261.1-igkv |(111081, 111379)|2.85809464473|(0.991,1.000,0.900)|1
----ARCDIQMTQSPSSLSASVGDRVTITCRASQGIS------SYLNWYQQKPGKAPKLL
IY----A--AS---SLASGVPSRFSGSGS--GTEFTLT------ISSLQPEDFAAYYCQQ
YNSA---
>V35RF-JABR01076261.1-igkv |(164504, 164804)|2.96195715951|(0.971,0.998,0.999)|1
----ARCDIQMSQSPSSLSASVGDRVTITCQASQGIS------NALAWYQQKPGKAPKLL
IY----D--AS---SLDSGVPSRFSGSGS--GTEFTLT------ISSLQPEDFATYYCQQ
YNSDP--
>V36RF-JABR01076263.1-igkv |(15350, 15650)|2.86738189872|(0.986,0.998,0.908)|1
----ARCDIQMTQSPSSLSASVGDRVTITCQASQGIS------SYLSWYQQKPGKAPKLL
IY----K--AS---SLASGVPSRFSGSGS--GTEFTLT------ISSLQPEDFAAYYCQQ
HNSLP--
>V38RF-JABR01076263.1-igkv |(35502, 35802)|2.9546404731|(0.994,0.982,0.980)|1
----ARCDIQMTQSPSSLSASVGDRVTITCQASQGIS------SWLAWYQQKPGKAPKLL
IY----K--AS---SLQSGVPSRFSGSGS--GTEFTLT------ISSLQPEDFATYYCQQ
HNSNP--
>V39RF-JABR01076263.1-igkv |(51711, 52011)|2.67475591569|(0.976,0.895,0.872)|1
----TTGEIVMTQSPATLSLSPGERATLSCRASQSVS------SRLVWYQQKHGQAPTLL
IY----G--AS---SRATGIPARFSGSGS--GTDFTLT------ISSLEPEDVGVYYCQQ
DYSWP--
>V40RF-JABR01076263.1-igkv |(105623, 105923)|2.99799200002|(1.000,0.999,0.999)|1
----ARCDIQMTQSPSSLSASVGDTVTITCQASQGIS------SYLAWYQQKPGKAPKLL
IY----A--AS---TLQSGVPSRFSGSGS--GTDFTLT------ISSLQPEDFATYYCQQ
YNSNP--
>V41RF-JABR01076263.1-igkv |(125399, 125698)|2.66539010128|(0.901,0.879,0.888)|1
----TTGEIVMTQSPATLSLSPGERATLSCRASQSVG------SYLAWYQQKPGQAPRLL
IY----G--AS---SRATGIPDRFSGSGS--GTEFTLT------ISSLEPEDFAVYFCQH
YNNWN--
>V44RF-JABR01076266.1-igkv |(4594, 4894)|2.99594800078|(0.997,1.000,0.999)|1
----ARCDIQMTQSPSSLSASVGDRVTITCQASQGIS------NYLAWYQQKPGKAPKLL
IY----K--AS---TLQSGVPSRFSGSGS--GTDFTLT------ISSLQPEDFATYYCQQ
GNSYP--
>V45RF-JABR01076266.1-igkv |(22548, 22848)|2.96229965252|(0.997,0.997,0.971)|1
----ARCDIQMTQSPSSLSASVGDRVTITCQASQGIS------SYLAWYQQKPGKAPKLL
IY----D--AS---TLQSGVPSRFSGSGS--GTDFTLT------ISSLQPEDFAAYYCQQ
GNSNP--
>V47RF-JABR01088351.1-igkv |(10561, 10879)|2.67455812926|(0.987,0.823,0.968)|1
----TSGDIVMTQTPLSLPVTPGEPASISCRSSQSLLDSDDGYTYLDWYLQKPGQSPQLL
IY----E--VS---NRASGVSDRFSGSGS--GTDFTLK------ISRVEAEDVGVYYCMQ
SIEYP--
>V48RF-JABR01088351.1-igkv |(62711, 63011)|2.95774839429|(0.978,0.990,0.991)|1
----ARCDIQMTQSPSSLSASVGDRVTITCRASQSIN------KELSWYQQKPGKAPTLL
IY----A--AS---SLQTGVSSRFSGSGS--GTDFTLT------ISSLQPEDVATYYCLQ
DYTTP--
>V51RF-JABR01088351.1-igkv |(113703, 114003)|2.78574112338|(0.989,0.937,0.901)|1
----ARCDIQMTQSPSSLSASVGDRVTITCRASQGIS------NDLAWYQQKLGETPKLL
IY----D--AS---SLQSGIPSRFSGSGS--GADFTLT------ISSLQPEDFATYYCQH
YYSAP--
>V52RF-JABR01088351.1-igkv |(136166, 136466)|2.98085201038|(0.996,0.990,0.995)|1
----ARCDIQMTQSPSSLSASVGDRVTISCQASQNIY------SNLGWYQQKPGKAPKLL
IY----A--AS---TLQSGVPSRFSGSGS--GTDFTLT------ISSLQPEDVATYYCQH
GYSTP--
>V53RF-JABR01088351.1-igkv |(159354, 159654)|2.97408440501|(0.996,0.981,0.998)|1
----ARCDIQMTQSPSSLSASVGDRITITCQASQGIS------NDLAWYQQKPGESPKLL
IY----E--AS---SLQSGIPSRFSGSGS--GTDFTLT------ISSLQPEDFATYYCQH
YYSTP--
>V54RF-JABR01088351.1-igkv |(170244, 170542)|2.93295210999|(0.994,0.971,0.972)|1
----ARCDIQMTQSPSSLSASVGDRVTISCQASESIS------DYLNWYQQKPGKAPKLL
IY----A--AS---TLQSVVPSRFSGSGS--GTDFTLT------ISSLQPEDFATYYCQH
GYGT---
>V55RF-JABR01089346.1-ighv |(860, 1169)|2.86140802357|(0.973,0.991,0.913)|1
----AQSQVQLVQ-SGAEVKKPGASVKVSCKASGYNF-R---SYAISWVRQAPGQGLEWM
GVIIPI-R-SRT--SYAQKFQGRVTITADTSTSTAYME------LSSLRSEDMAVYYCAR
-------
>V58RF-JABR01091180.1-ighv |(60296, 60605)|2.92600449196|(0.962,0.988,0.980)|1
----VQCEVQLVE-SGGGLVQPGGSLRLSCAASGFTF-S---SYWMSWVRQAPEKGLEWV
SYINSD-G-SST--SYADSMKGRFTISRDNAKNSLYLQ------MNSLRAEDRAVYYCVR
-------
>V59RF-JABR01091180.1-ighv |(68033, 68348)|2.9368997325|(0.992,0.966,0.982)|1
----VQCEVQLVE-SGGGLVQPGGSLRISCAASGFTF-S---SSAMHWVRQASGKGLEWV
GRIRSKSKNYAT--DYAASVKGRFTISRDDSKNTAYLQ------MNSLKTEDTAVYYCTT
-------
>V60RF-JABR01091180.1-ighv |(78923, 79238)|2.96459608|(0.992,0.991,0.982)|1
----VQCEVQLVE-SGGGLVQPEGSLRLSCAASGFTF-S---SYYMHWVRQAPGKGLEWV
GLIKNKANSYTT--EYAASVKGRFTISRDDSKNTLYLQ------MSSLKTEDTAVYYCAR
-------
>V69RF-JABR01092448.1-trbv |(79737, 80037)|2.54591874586|(0.879,0.829,0.851)|1
-----SFHAKVTQTPGYLVKGKGQKTKMDCTPEKG-------HTFVYWYQQNQNKEFTFL
ISFQSEQ---VL--QETELHKKRFSSQCPK-NPPCSLE------ILSSEPGDTALYLCAS
SQ-----
>V70RF-JABR01092448.1-trbv |(88946, 89244)|2.71000062456|(0.904,0.936,0.877)|1
-----SMDADVTQTPRNMIAKTGKRIMLECSQTKG-------HDQMYWYRQDPGLGLRLI
YYSFDVK--D----INKGEISDGYSVSRQE-QAQFSLS------LESATPNQTALYFCAT
SD-----
>V71RF-JABR01092448.1-trbv |(97426, 97723)|2.66381023297|(0.885,0.939,0.855)|1
-----LMEADIYQNPRHRVIGTGKKITLECSQTMG-------HDKMYWYQQDPGMELHLI
HYSYGVN--S----TERGDFSSESTVSRIR-IEHFPLT------LESASPSHTSQYLCAS
SE-----
>V73RF-JABR01092448.1-trbv |(137251, 137558)|2.49977966077|(0.878,0.767,0.906)|1
-----LVDVKVTQSSRHLIKRMGEKVFLECVQDMD-------HERMFWYRQDPGLGLQLI
YFSYDVK--V----NEKGDIPEGYSVSREK-KERFSLI------LGSASTNQTSMYLCAS
SLSTA--
>V82RF-JABR01189674.1-iglv |(736, 1045)|2.76277652089|(0.904,0.925,0.941)|1
----SWAQSVLTQ-PPSASGAPGQSVTISCSGSSS---NIR-GNGVHWYQQLSGTAPKIL
IY----N--NN---QRPSGVPDRFSGSKS--GTSASLA------ITGLRSEDEADYYCEA
WDDSLSA
>V83RF-JABR01196792.1-trbv |(5405, 5708)|2.49995548559|(0.844,0.777,0.919)|1
----SVFSALVSQKPSRDVCQRGTSVTIQCQVDSQ-------VTMMFWYRQQPGQSLTLI
ATANQGS--EAT--YEGGFVIDKFPISRPN-LTFSTLT------VSNTSPEDSSIYLCSV
E------
>V84RF-JABR01004697.1-ighv |(11840, 12149)|2.91786978086|(0.990,0.957,0.976)|-1
----VQGEVQLVE-SGGGLVQPGGSLRLSCAASGFTF-G---DYAMSWVRQAPGKGLEWV
SYISSA--SSTI--YYADSVKGRFTISRDNAKNTLSLQ------MNNLRAEDTAVYYCAK
-------
>V88RF-JABR01004698.1-ighv |(16088, 16403)|2.95585291224|(0.995,0.967,0.997)|-1
----VQCEVQLVE-SGGGLVQPGGSLRLSCAASGFTF-S---SSAMHWVRQASGKGLEWV
GRIRSKSNNYAT--DYAASVKGRFTISRDDSKNTLYLQ------MNSLKTEDTAVYYCTT
-------
>V89RF-JABR01011024.1-ighv |(77, 386)|2.94324594723|(0.983,0.963,1.000)|-1
----VQCEVQLVE-SGGGLAKPAGSLRLSCAASGFTF-S---SYGMHWVRQAPGKGLEWV
SYINSG--GGST--RYADSVKGRFTISRDNAKNTLYLQ------MDSLRAEDTAVYYCAR
-------
>V91RF-JABR01035059.1-ighv |(16381, 16696)|2.96731671213|(0.980,0.995,0.994)|-1
----VQCEVQLVE-SGGGLVQPGGSLRLSCAASGFTF-S---NYWMGWVRQAPGKGLEWV
GRIKKTTDGGTA--EYAASVKGRFTISRDDSKNTLYLQ------MNSLKTEDTAVYYCAR
-------
>V93RF-JABR01035060.1-ighv |(7723, 8038)|2.88815776902|(0.970,0.941,0.981)|-1
----VKCEAQLME-SGGGLVQPGGSLRLSCAASGFTF-S---DHYMQWVRQAPGKGLEWV
GLIRNKADGETT--DYAASVKGRVTISRDDSKSITYLQ------MSSLKTEDTAVYYCAR
-------
>V94RF-JABR01035060.1-ighv |(11223, 11532)|2.88520600457|(0.990,0.925,0.987)|-1
----VLSQVQLQE-SGPGLVKPSETLSLTCAVSGGSL-S---GYYWGWIRQPPGKGLEWI
GYISGS-S-GST--NYNPSLKSRVTISTDTSKNQFSLK------LSSVTAADTAVYYCAR
-------
>V99RF-JABR01039937.1-trav |(16162, 16450)|2.49990510427|(0.805,0.829,0.918)|-1
----LSGELKVGQNPLFLSTQEGRNYTVYCNYSTA-------SDRLYWYRQNPGKSLESL
FVLLSNG--AV---KQEGRLMASLDTK----ARLSTLY------ITAALQDLSATYFCAV
-------
>V101RF-JABR01049702.1-ighv |(5414, 5728)|2.84170344418|(0.970,0.986,0.904)|-1
----VQCEVQLVE-SGGGLVQPGGSLRLSCAASGFTF-S---DHYLSWVRQAPGKGLEWV
SFMRNNANGGRT--EYAASVKGRCTISRDDSKSITSLQ------MSSLKTEDTAVYYCAR
-------
>V102RF-JABR01055994.1-ighv |(3382, 3691)|2.85639884577|(0.990,0.995,0.902)|-1
----AQSQVQLVQ-SGAEVKKPGASVKLSCKASGYTF-T---SYNINWVRQAPGQGLEWM
GWINPS-S-GST--GYAQNFQGRVTMTRDTSTSTAYME------LSSLRSEDTAVYYCAR
-------
>V104RF-JABR01061517.1-igkv |(25345, 25645)|2.91921630725|(0.978,0.964,0.978)|-1
----ARCDIQMTQSPSSLSASVGDRVTITCRSSQGIN------NYLSWCQQKPGKAPKPL
IY----Y--AS---SLETGVPSRFSGSGS--GTDFTLT------ISSLQPEDIATYYCQQ
YDNLP--
>V111RF-JABR01071855.1-iglv |(8003, 8306)|2.9588099056|(0.997,0.975,0.989)|-1
----SWAQSALTQ-PPSVSGSPGQSVTISCTGTSS---DVGGYNYVSWYQQHPGTAPKLM
IY----D--VS---NRPSGVSDRFSGSKS--GNTASLT------ISGLQAEDEADYYCCS
YAGS---
>V113RF-JABR01071855.1-iglv |(31384, 31694)|2.88909816714|(0.996,0.928,0.984)|-1
----SWAQSALTQ-PRSVSGSPGQSVTISCTGTSN---DVGSYNSVSWYQQHPGKAPKLV
IY----E--VS---KRPSGVSDRFSGSKS--GNTASLT------ISGLQAEDEADYYCSS
YAGSGT-
>V114RF-JABR01071855.1-iglv |(60946, 61249)|2.8344689921|(0.940,0.930,0.968)|-1
----SAASYELTQ-PPSVSVSPGQTARITCSG------DTLPDNYAYWFQQKPGQSPVLI
IY----E--DS---KRPSGIPERFSGSSS--GTVATLT------ISGAQVEDEADYYCYS
SDSSGNH
>V115RF-JABR01071855.1-iglv |(71726, 72036)|2.81094289672|(0.991,0.889,0.973)|-1
----SWAQSALTQ-PPSVSGSPGQSVTISCTGTSS---DIGGYNYVSWYQQHPGTALKLM
IY----G--VS---NRPSGVSDRFSGSKS--GNTASLT------ISGLQAEDEADYYCSS
YSSSYY-
>V119RF-JABR01071856.1-iglv |(45472, 45775)|2.84629443766|(0.993,0.953,0.925)|-1
----SWAQSALTQ-PRSVSGSPGQSVTISCTGTSN---DVGSYNSVSWYQQHPGKAPKLV
IY----E--VS---KRPSGVSDRFSGSKS--GNTASLT------ISGLQAEDEADYYCCS
YTTS---
>V121RF-JABR01071856.1-iglv |(64968, 65271)|2.6325375054|(0.957,0.828,0.918)|-1
----SVVSSELTQ-DPAVSVALGQTVKITCQG------DSLSSYYASWYQQKPGQVPVLV
IY----G--NS---NRPSGIPDRFSGSYS--GNTASLT------ITGAQVEDEADYYCGS
WDSSGNY
>V124RF-JABR01071856.1-iglv |(104914, 105224)|2.91104630182|(0.989,0.937,0.996)|-1
----SWAQSALTQ-PRSVSGSPGQSVTISCTGTSS---DIGGYNLVSWYQQHPGTAPKLV
IY----D--VS---KRPSGVSDRFSGSKS--GNTASLT------ISGLQAEDEADYYCCS
YAGSDT-
>V126RF-JABR01071856.1-iglv |(122751, 123054)|2.78452530125|(0.973,0.903,0.934)|-1
----SAASYDVTQ-PQSVSVSPGQTARITCGG------DNIGSKAVHWYQQKPAQAPVLV
IY----D--DS---ERPSGIPERFSGSNS--GNTATLT------ISGVEAGDEADYYCQV
WDSSSDH
>V127RF-JABR01071859.1-iglv |(21796, 22105)|2.76532114428|(0.927,0.888,0.961)|-1
----SWAQSVLTQ-PPSASEAARKSVTISCSGSSS---NIG-SNRVSWYQQLPGTAPKLL
IY----N--NN---QRPSGVPDRFSGSKS--GTSASLA------ISGLQTEDEADYYCAA
WDDSLSS
>V131RF-JABR01071860.1-iglv |(31436, 31745)|2.73835457058|(0.975,0.856,0.963)|-1
----SWAQSVLTQ-PPSVSGVPGQKVTISCTGSSS---NIG-GYYVQWYQQLPGTAPKLL
IY----Q--DN---KRPSGVSDRFSGSKS--GTSASLA------ITGLQSEDEADYYCGT
WDSSLNG
>V132RF-JABR01071860.1-iglv |(36557, 36866)|2.91721476928|(0.985,0.961,0.974)|-1
----SWAQSVLTQ-PPSVSGAPGQKVTISCTGSSS---NIG-GYYVSWYQQLPGTAPKLL
IY----Q--DN---KRPSGISDRFSGSKS--GTSASLA------ITGLQTEDEADYYCQS
YDSSLSG
>V134RF-JABR01071861.1-iglv |(18449, 18758)|2.79079894835|(0.982,0.890,0.955)|-1
----SWAQSVLTQ-PPSASGIPGQSVTISCSGSSS---NIG-SNNVYWYQQFPGTAPKLL
IY----N--NN---QRPSGVPDRFSGSKS--GTSASLA------ISGLRSEDEADYYCEA
WDDNLSG
>V137RF-JABR01071862.1-iglv |(65675, 65984)|2.76277652089|(0.904,0.925,0.941)|-1
----SWAQSVLTQ-PPSASGAPGQSVTISCSGSSS---NIR-GNGVHWYQQLSGTAPKIL
IY----N--NN---QRPSGVPDRFSGSKS--GTSASLA------ITGLRSEDEADYYCEA
WDDSLSA
>V138RF-JABR01071862.1-iglv |(83033, 83345)|2.7931824953|(0.985,0.880,0.972)|-1
----SWAQSVLTQ-PPSVSGTPGQRVTISCTGSSS---NIGVGYYVSWYQQLPGTAPKLL
IY----Q--DN---KRPSGISDRFSGSKS--GTSASLA------ITGLQSEDEADYYCQS
YDNSLSG
>V139RF-JABR01071862.1-iglv |(111105, 111415)|2.76647022872|(0.969,0.885,0.943)|-1
----SLSQPVLTQ-PTSLSASPGASARLTCTLSSG---INVGSYRIFWYQQKPGSAPRYL
LSYYTDS--DK---HQGSGVPSRFSGSKDASANAGILL------ISGLQSEDEADYYCMI
-------
>V140RF-JABR01071862.1-iglv |(116435, 116744)|2.79308850952|(0.950,0.915,0.934)|-1
----SWAQSVLTQ-PRSASGTPGQRVTISCSGSSS---NTG-SNYVSWYQQLPGTAPKPL
IY----Y--DD---KQASGVSDRFSGSKS--GTSASLA------ISGLQSEDEADYYCAT
WDNSLSG
>V143RF-JABR01077601.1-iglv |(19390, 19700)|2.67102832614|(0.914,0.880,0.885)|-1
----SWANFMLTQ-PHSVSGSVGQKVVISCTRSSG---SIG-SYYVQWYQQRPGSAPTTV
IY----D--DN---ERPSGVPDRFSGSIDSSSNSASLT------ISGLETEDEADYYCQS
YDSSS--
>V145RF-JABR01077601.1-iglv |(59589, 59901)|2.81950720333|(0.967,0.907,0.960)|-1
----SWAEVVFTQ-PHSVSGSPGQTVTISCTRSSG---SIG-SYYVQWYQQRPGSAPTTV
IY----N--DN---KRPSGVPDRFSGSIDSSSNSASLT------ISGLKSEDEADYYCQS
AADSYS-
>V147RF-JABR01077603.1-iglv |(14585, 14894)|2.72427536413|(0.889,0.920,0.924)|-1
----VDSETEVTQ-EPSLSVSPGGTVTLTCGLSSG---SVSTSNYPSWYQQTPGQAPRMI
IY----N--TN---TRPSGVPDRFSGSIL--GNKAALT------ITGAEADDESDYYCVL
YMGSGI-
>V148RF-JABR01077916.1-ighv |(11011, 11320)|2.95330075255|(0.986,0.999,0.970)|-1
----VQCEVQLVE-SGGDLVKPGGSLRLSCVASGFTF-S---SYAMHWVRQAPGKGLEWV
SVISTS--GGST--YYADSVKGRFTISRDNAKNSLSLQ------MNSLRAEDTAVYYCAR
-------
>V149RF-JABR01077916.1-ighv |(16007, 16319)|2.83360436451|(0.951,0.924,0.962)|-1
----VLSQVQLQE-SGPGLVKPLETLSLTCAVSGYSI-S-SG-YYWSWIRQPPGKGLEWI
GRIYGS-S-GST--DYNPSLKSRVTISKDTSKNQFSLK------LSSVTAEDTAVYYCAR
-------
>V150RF-JABR01077917.1-ighv |(3891, 4200)|2.89267205249|(0.967,0.958,0.968)|-1
----VLSQVQLQQ-WGEGLVKPSETLSLTCAVSGGSI-S---SYWWSWIRQPPGKGLEWI
GEINGN-S-GST--NYNPSLKSRVTISTDTSKNQFSLK------LSSVTAADTAVYYCAR
-------
>V152RF-JABR01078980.1-ighv |(7987, 8296)|2.92706338371|(0.989,0.984,0.958)|-1
----AQSQEQLVQ-SGAEVKKPGASVKVSCKASGFTF-D---SYAISWVRQAPGQGLEWM
GWIVPD-Y-DIT--NYAQKFQGRVTITADTSTSTAYME------LSSLRSEDTAVYYCAR
-------
>V154RF-JABR01088213.1-trbv |(2386, 2682)|2.61956595086|(0.897,0.847,0.886)|-1
-----SVDAGVTQSPTHLIKMRGQQVTLRCSPISG-------HNSVSWYQQALGQGPQLI
VQYYREQ---EN--GR-GNFPERFSGHQFP-NYSSELN------VSALLLVDSALYLCAS
SL-----
>V156RF-JABR01088213.1-trbv |(27616, 27913)|2.53023124233|(0.874,0.909,0.784)|-1
-----HMDAGITQSPRHKITETGTPVTLRCHQTEN-------HRYMYWYRQDLGYGLRLI
HYSYGVE--D----TDKVEVSDGYSVSRSK-TEDFLLT------LESATHSQTSVYLCAS
SE-----
>V160RF-JABR01088214.1-trbv |(9866, 10166)|2.77169983482|(0.947,0.906,0.927)|-1
-----HTCAGVSQSPRYKVTKRGQDVTLRCDPISG-------HEYLYWYQQVPGQGREFL
TYFQND---AQL--DKSGLPSDRFSAERPE-GSISILK------IQRTEQGDSAVYLCAS
SL-----
>V164RF-JABR01088214.1-trbv |(45860, 46151)|2.52139358233|(0.958,0.976,0.749)|-1
-------NAGVTQTPKFQVLKTGQSMTVQCTQDMN-------HNYMYWYRQDPGMGLRLI
YYSVTAG--I----TTKGEVSNGYNVSRIN-TEDFLLR------LESAAPSQTSVYFCAS
SY-----
>V165RF-JABR01088215.1-trbv |(4946, 5242)|2.45739725366|(0.930,0.794,0.838)|-1
-----PVQAGVTQSPTYLIKRRGQQVTLRCSPISG-------HTSVSWYQQALGQGPQFI
FEYSNEL---RT--SE-GNFPDRFSGRQFR-NYHSEMN------VSALELGDSALYLCAS
SF-----
>V171RF-JABR01088215.1-trbv |(64243, 64539)|2.84629713907|(0.967,0.980,0.912)|-1
-----PVNAGVTQTPKFQVLKTGQSMILQCAQDMN-------HDYMYWYRQDPGMGLRLI
HYSVGAG--I----TDKGEVSNGYSVSRSN-TEDFPLR------LESAAPSQTSVYFCAS
SY-----
>V178RF-JABR01088216.1-trbv |(3479, 3776)|2.78494983875|(0.950,0.900,0.945)|-1
-----PANAGVTQSPKFQILKTGQSMTLQCAQDMN-------HNSMYWYRQDPGMGLRLI
HYSVAEN--T----TDTGEVPDGYSVSRLK-KKDFLLR------LESAAPSQTSVYFCAS
SE-----
>V182RF-JABR01088216.1-trbv |(32988, 33285)|2.88072634217|(0.981,0.976,0.933)|-1
-----PVNAGVTQTPKFQILKTGQSMTLQCAQDMN-------HNYMYWYRQDPGMGLRLI
HYSVGKG--S----TDTGEVPDGYSVSRSN-LQNFMLR------LESAAPSQTSVYFCAS
SE-----
>V185RF-JABR01098590.1-trav |(5160, 5460)|2.49516077411|(0.921,0.847,0.803)|-1
----FSMAQTVTQSQPEMSVQEAETVTLSCTYDTS-----DSDYYLFWYKQPPSRQMILI
IRQEAYK--QQN--ATENRFSVNFQKA----AKSFSLK------ISDSQLGDAAGYFCAY
R------
>V186RF-JABR01098592.1-trdv |(18652, 18953)|2.23452035839|(0.720,0.736,0.815)|-1
----SSMAQTVTQSQPEMSVQEAETVTLNCTYDTS-----ESNYYLFWYKQPPSRQMILI
IRQEAYK--QQN--AKENRFSVNFQKA----AKSFSLK------ISDSQLGDAAMYFCAF
M------
>V199RF-JABR01098598.1-trav |(19033, 19320)|2.66586203088|(0.909,0.878,0.885)|-1
-----VNSQQGEEDPQALSIQEGENATMNCSYKT------S-IDNLQWYRQDSGRSLVRL
ILIRSNE--RE---KSSGRLRVTLDTS----KKSSSLL------ITASRAADTASYFCAT
D------
>V200RF-JABR01098598.1-trav |(25184, 25475)|2.54386940851|(0.822,0.960,0.836)|-1
----RTNGDSVTQTEGPVTLPERAALTLNCTYQTS-----YS-AFMFWYVQYLNKEPELL
LKSS-E---NQE--TDSRGFQASHVKS----DSSFHLE------KLSVQLSDSAVYYCVL
R------
>V202RF-JABR01098599.1-trav |(7776, 8069)|2.75347510987|(0.919,0.898,0.940)|-1
---VWSQQKEVEQNPGPLSVPEGATASLNCTYSNS-----A-FQYFMWYKQYSRKGPQLL
IYTYSSG--DK----EDGRFTAQVDKS----SKYISLF------IRDSQPSDSATYFCAM
S------
>V204RF-JABR01098600.1-trav |(14202, 14490)|2.57218998163|(0.821,0.879,0.962)|-1
---VWS-QQKVEQNSGSLSVPEGAIASLNCTYSDR-----G-SQSFLWYRQYSGQSPELL
ISTYSSG--DK----EDGRFTAQLNKA----SQYVSLL------IRDSQLSDSATYLCVV
-------
>V206RF-JABR01098600.1-trav |(26541, 26838)|2.39516822136|(0.917,0.851,0.750)|-1
----TARAQSVTQPDIHITVSEGASLELRCNYSYG-----AT-PSLFWYVQSPGQGLQLL
LKYFSGD--TLV--QGIKGFEAEFKRS----QYSFNLR------KPSVHWSDAAEYFCAA
G------
>V207RF-JABR01098600.1-trav |(40729, 41022)|2.42583565057|(0.927,0.772,0.845)|-1
----VSRGESVGLHLPTVSVQEGDNSVINCTYSDS-----V-SDYFLWYKQESGKGPQFI
IDIRSNM--AK---RQGQRLTVLLNKT----VKHLSLQ------IAATEPGDSAVYFCAE
N------
>V210RF-JABR01098601.1-trav |(15930, 16220)|2.7628984707|(0.937,0.898,0.934)|-1
-----VNGENVEQHPSILSVQEGDSSVIKCTYSDS-----A-SNYFPWYKQELGKGPQLI
IDIRSNV--HE---KKDQRITVLLNKT----AKHFSLH------ITETQPGDSAVYFCAA
S------
>V211RF-JABR01098603.1-trav |(9193, 9499)|2.38524037236|(0.907,0.733,0.866)|-1
---VWSQQKEVEQDPGPFSVPEGATVTFNCTYSNS-----A-SQSFFWYRQDSRKEPKLL
MSVYSSG--N-----EDGRFTAQLNRA----SQYISLL------IRDSQLSDSATYLCAV
RTQCSP-
>V213RF-JABR01098604.1-trav |(11404, 11694)|2.68003455457|(0.883,0.864,0.955)|-1
----MSRGEDVEQS-LFLSVREGDISVINCTYTDS-----S-STYLYWYKQEPGAGLQLL
TYILSNT--DL---KQDQRLTVLLNKK----DKHLSLR------IADTQTGDSAIYFCAE
S------
>V215RF-JABR01098604.1-trav |(37115, 37402)|2.52221930123|(0.822,0.833,0.882)|-1
----ANGENQVEQSPRFLGPQQGDVAFMSCMYSVS-----R-FNNLQWYRQNTGTGPKHL
FSMYSAG--YE---KQKGRLNATLLKN------GSSLY------ITAMQPEDSATYFCAV
D------
>V216RF-JABR01098604.1-trav |(64438, 64732)|2.86574067733|(0.958,0.979,0.933)|-1
----EINGDSVVQTEGQVLLSEGDSLIVNCSYEST-----QY-PSLFWYVQYPGEGPQLL
LKAMMA---NDK--ESNKGFEATYHKE----TTSFHLK------KDSVQESDSAVYFCAL
S------
>V217RF-JABR01098604.1-trav |(77658, 77951)|2.40119386655|(0.762,0.832,0.891)|-1
----GSGKNQVEQSPQSLIILEGKNCTLQCNYTVS-----P-FNNLRWYKQDTGKGPISL
TIMTFSE--NT---KLNGRYTATLDAD----TKQSSLH------ITATQLSDSASYICVV
S------
>V221RF-JABR01184607.1-trbv |(64, 364)|2.64255044765|(0.902,0.915,0.841)|-1
-----HTGAGVSQSPRNKVTEKGKDVALRCDPISG-------HTVLYWYRQNLGQGLEFL
IYFRGT---GAV--DDSGLRSDQFSATRPE-GSDSTLK------IQCTEQRDSAMYFCAS
SL-----
>V222RF-JABR01190886.1-ighv |(459, 765)|2.86740093364|(0.961,0.982,0.930)|-1
-----CAEVQLVQ-SGAEVKRPGESLKISCKTSGYSF-T---SYWISWVRQMPGKGLEWM
GMIYLG-D-SDT--RYSPSFQGQVTISADKSISTTYLQ------WSSLKASDTATYYCAK
-------
>V0RF-CABD02043817.1-igkv |(3028, 3328)|2.96468883957|(0.982,0.984,1.000)|1
----ARCDIQMTQSPSSLSASVGDRVTITCQASQGIS------NNLNWYQQKPEKTPKLL
IY----A--AS---SLQSGIPSRFSDSGS--GTDYTLT------ISSLQPEDFATYYCQQ
SDSTP--
>V3RF-CABD02105570.1-trav |(17984, 18274)|2.72593938112|(0.909,0.953,0.876)|1
----MSRGEDVEQS-LFLSVQEGDSSIIKCTYTDS-----S-STYLYWYKQEPGAGLQLL
MYIFSNM--DM---KQDQRLTVLLNKK----DKHLSLR------IADTQTGDSAIYFCAE
S------
>V5RF-CABD02105579.1-trav |(4709, 5003)|2.88492674205|(0.976,0.991,0.928)|1
----GINGDSVVQTEGQVLLSEGDSLIVNCSYETT-----QY-PSLFWYVQYPGEGPQLL
LKAMKA---NDK--GRNKGFEATYHKE----TTSFHLE------KDSVQESDSAVYFCAL
S------
>V6RF-CABD02105581.1-trav |(5845, 6138)|2.43290087818|(0.824,0.745,0.965)|1
----GSGKNQVEQSPQSLIILEGKNCTLRCNYTVS-----P-FNNLRWYKQDTGRGPVSL
TIMTFSE--NT---KSNGRYTATLDAD----TKQSSLH------ITASQLSDSASYICVV
S------
>V7RF-CABD02105584.1-trav |(2822, 3110)|2.74223004247|(0.907,0.882,0.973)|1
---VWSQRKEVEQDPGPFNVPEGATVAFNCTYSNS-----A-SQSFFWYRQDCRKEPKLL
MSVYSSG--N-----EDGRFTAQLNRA----SQYISLL------IRDSQLSDSATYLCAV
-------
>V8RF-CABD02105586.1-trav |(1660, 1957)|2.58933395491|(0.912,0.881,0.828)|1
----GTRAQSVTQLDSHVSVSEGTPVLLRCNYSSS-----YS-PSLFWYVQHPNKGLQLL
LKYTSRA--TLV--KGINGFEAEFKKS----ETSFHLT------KPSAHMSDAAEYFCAV
S------
>V10RF-CABD02105588.1-trav |(25116, 25407)|2.74053496597|(0.928,0.891,0.927)|1
---VWSQQKEVEQNSGPLSVPEGAIASLNCTYSDR-----R-SQSFFWYRQYSGKSPELI
MSIYSNG--DK----EDGRFTAQLNKA----SQYVSLL------IRDSQPSDSATYLCAV
-------
>V11RF-CABD02105589.1-trav |(20536, 20829)|2.61400925646|(0.929,0.837,0.888)|1
----VSRGESEGLHLPTLSVQEGDNSIINCAYSNS-----A-SDYFIWYKQESGKGPQFI
IDIRSNM--DK---RQGQRVTVLLNKT----VKHLSLQ------IAATQPGDSAVYFCAE
N------
>V12RF-CABD02105589.1-trav |(26461, 26764)|2.55131450683|(0.886,0.777,0.952)|1
----PGIAQKITQTQPGMFMQEKEAVTLDCTYDTS-----DQSYGLFWYKQPSSGEMIFL
IYQGSYD--QQN--ATEGRYSLNFQKA----RKSANLV------ISASQLGDSATYFCAM
RE-----
>V13RF-CABD02105590.1-trav |(3574, 3868)|2.81982541375|(0.930,0.929,0.966)|1
----RTRGDSVTQMEGPVTLSEEAFLTINCTYTAT-----GY-PSLFWYVQYPGEGLQLL
LKATKA---DDK--GSNKGFEATYHKE----TTSFHLE------KDSVQASDSAVYFCAL
S------
>V14RF-CABD02105592.1-trav |(17384, 17677)|2.77796483513|(0.942,0.900,0.943)|1
---VWSQQKEVEQDPGPLSVPEGAIASLNCTYSNS-----A-FQYFMWYRQYSRKGPELL
MYTYSSG--NK----EDGRFTVQVDKS----SKYISLF------IRDSQPSDSATYLCAM
S------
>V15RF-CABD02105596.1-trav |(11716, 12003)|2.81964192834|(0.923,0.961,0.943)|1
-----VNSQQGEEDPQALSIQEGENATMNCSYKT------S-INNLQWYRQNSGRGLVHL
ILIRSNE--RE---KHSGRLRVTLDTS----KKSSSLL------ITASRAADTASYFCAT
D------
>V16RF-CABD02105598.1-trdv |(2122, 2425)|2.18849109485|(0.782,0.718,0.720)|1
----SSMAQKVTQTQNEISVVEKEDVTLDCVYETR-----DTTYYLFWYKQPPSGELVFL
VRQNSFD--EQN--EISGRYSWNFQKS----TSSFNFT------ITASQVVDSAVYFCAL
SE-----
>V17RF-CABD02105602.1-trav |(5884, 6171)|2.56130846924|(0.923,0.872,0.819)|1
----LSGEDQVTQSPEALRLQEGESSSLNCSYTVS-----G-LRGLFWYRQDPGKGPEFL
FTLYSAG--EE---KEKERLKATLTKK------ESFLH------ITAPKPEDSATYLCAV
Q------
>V18RF-CABD02105602.1-trav |(17805, 18104)|2.38864393773|(0.854,0.713,0.911)|1
----VSSKQEVTQIPAALSVPEGENLVLNCSFTDS-----A-IYSLQWFRQDPGKGLTSL
LLIQSSQ--RE---QTSGRLNASLDKS----SGHSTLY------IAASQPGDSATYLCAV
RHS----
>V20RF-CABD02105611.1-trdv |(4032, 4332)|2.36261831412|(0.796,0.726,0.916)|1
----SSVAQKVTQAQSSVSTSVRKAVTLNCLYETSQ----WS-YYIFWYKQLPSKEMIFL
IRQGSAE--Q-N--AKSGRYSVNFKKA----AKSVALT------ISALQLEDSAKYFCAL
WE-----
>V23RF-CABD02105615.1-trav |(7807, 8097)|2.59962749853|(0.845,0.865,0.906)|1
-----TIIDAKTTQPTSMDCAEGRAANLPCNHSTI-----SGNEYVYWYRQIHSQGPQYI
IHGLKNN--E-----TNEMASLIITED----RKSSTLI------LPHATLRDTAVYYCIV
RV-----
>V28RF-CABD02105626.1-trdv |(13262, 13563)|2.25251751797|(0.726,0.744,0.815)|1
----SGTAQTVTQSQPEMSVQEAETVTLSCTYDTS-----ESNYYLFWYKQPPSRQMILV
IRQEAYK--QQN--ATENRFSVNFQKA----AKSFSLK------ISDSQLGDTAMYFCAF
M------
>V29RF-CABD02105626.1-trav |(22480, 22780)|2.7190132749|(0.953,0.954,0.852)|1
----FSMAQTVTQSQPEMSVQEAETVTLSCTYDTS-----ESDYYLFWYKQPPSRQMILV
IRQEAYK--QQN--ATENRFSVNFQKA----AKSFSLK------ISDSQLGDAAMYFCAY
R------
>V30RF-CABD02105628.1-trav |(15554, 15842)|2.45324468725|(0.807,0.778,0.936)|1
----LSGELKVGQNPLFLSTQEGKNYTIYCNYSTT-------SDRLYWYKQDPGKSLESL
FVLLSNG--AV---KQEGRLMASLDTK----ARLSSLH------ITAAVHDLSATYFCAV
-------
>V35RF-CABD02136332.1-ighv |(9347, 9656)|2.947794597|(0.997,0.976,0.978)|1
----AHSQVQLVQ-SGAEVKKPGASVKVSCKASGYTF-T---SYYMHWVRQAPGQGLEWM
GIINPS-G-GST--SYAQKFQGRVTMTRDTSTSTVYME------LSSLRSEDTAVYYCAR
-------
>V39RF-CABD02196554.1-igkv |(8457, 8757)|2.84518969173|(0.989,0.910,0.972)|1
----ARCDIQLTQSPTSLSASVGDRVTITCQASQGIS------NNLAWYQQKPGKVPKLL
IY----S--AS---SLQSGVPSRFSGSGS--GTDFTRT------ISSLQPEDVATYYCQR
TYNAP--
>V40RF-CABD02196563.1-igkv |(2290, 2590)|2.97120155558|(0.997,0.976,1.000)|1
----ARCDIQMTQSPSSLSASVGDRVTITCRASQGIS------SWLAWYQQKPGKAPKLL
IY----A--AS---SLESGVPSRFSGSGS--GTDFTLT------ISSLQPEDFATYYCQQ
ANSFP--
>V44RF-CABD02196586.1-igkv |(1073, 1373)|2.98020030738|(0.999,0.985,0.997)|1
----ARCDIQMTQSPSSVSASVGDRVTITCRASQGIS------NSLNWYQQKPGKAPRLL
IY----D--AS---SLESGVPSRFSGSGS--GTDFTLT------ISSLQPEDFATYYCQQ
FNSYP--
>V45RF-CABD02196587.1-igkv |(1282, 1582)|2.9813881665|(0.999,0.987,0.996)|1
----ARCAIQMTQSPSSLSASVGDRVTITCRASQGIS------SYLAWYQQKPGKAPKLL
IY----Y--AS---SLQSGVPSRFSGSGS--GTDYTLT------ISSLQPEDFATYYCQQ
HSSTP--
>V46RF-CABD02196588.1-igkv |(1835, 2135)|2.85679932146|(0.999,0.949,0.935)|1
----TTGEIVMTQSPATLSVSPGERATLSCRASQSVS------SYLAWYQQKPGQAPRLL
IY----G--AS---NRATGIPARFSGSGS--GTDFTLT------ISSLEPEDFAVYYCQQ
YNNWS--
>V48RF-CABD02196595.1-igkv |(5365, 5665)|2.85731605249|(0.995,0.922,0.965)|1
----ARCAIRMTQSPSSLSASTGDRVTITCRASQGIS------SYLAWYQQKPGKAPKLL
IY----A--AS---TLQSGVPSRFSGSGS--GTEFTLT------ISCLQSEDFATYYCQQ
YYSYP--
>V49RF-CABD02199693.1-igkv |(2056, 2356)|2.95832013632|(0.985,0.978,0.996)|1
----ARCDIQVTQSPSSLSASVGDRVTITCRASQGIS------NELSWYQQKPGQAPTLL
IY----A--AS---SLQSGVPSRFSGSGS--GTDFTLT------ISSLQPEDIATYYCLQ
DYTTP--
>V50RF-CABD02231299.1-iglv |(4157, 4463)|2.7291471352|(0.886,0.959,0.907)|1
-----DSQTVVTQ-EPSFSVSPGGTVTLTCGLSSG---SVSTSYYPSWYQQTPGQAPRML
IY----S--TN---TRSSGVPDRFFGSII--GNKAALT------ITGAQADDESDYYCVL
YMGSGI-
>V52RF-CABD02231318.1-iglv |(3555, 3862)|2.78604258827|(0.942,0.901,0.950)|1
----SWANFMLTQ-PHSVSESPGQTVTISCTRSSG---SIA-SNYVQWYQQRPGSAPTTV
IY----E--DN---QRPSGVPDRFSGSIDSSSNSASLT------ISGLKTEDEADYYCQS
YDSS---
>V54RF-CABD02231359.1-iglv |(5556, 5865)|2.83693047006|(0.961,0.960,0.922)|1
----SWAQSVLTQ-PPSVSAAPGQKVTISCSGSS----SNIGNNYVSWYQQLPGTAPKIL
IY----D--NN---KRPSGISDRFSGSKS--GTSATLG------ITGLQTGDEADYYCGT
WDSSLSA
>V57RF-CABD02231362.1-iglv |(1583, 1892)|2.87010611876|(0.945,0.965,0.963)|1
----SWAQSVLTQ-PPSASGTPGQRVTISCSGSSS---NIG-SNTVNWYQQLPGTAPKLL
IY----D--NN---KRPSGVPDRFSGSKS--GTSASLA------ISGLRSEDEADYYCAA
WDDSLNG
>V59RF-CABD02231364.1-iglv |(18770, 19079)|2.84472989931|(0.951,0.922,0.978)|1
----SWAQSVLTQ-PPSASGTPGQRITISCSGSSS---NIG-SNTVNWYQQLPGTAPKLL
IY----D--NN---KRPSGVPDRFSGSKS--GTSASLA------ISGLQSEDEADYYCAA
WDDSLNG
>V61RF-CABD02231410.1-iglv |(1308, 1605)|2.93430455465|(0.993,0.966,0.979)|1
----SVASYELTQ-PSSVSVSPGQTARITCSG------DVLAKNYAGWYQQKPGQAPVLV
IY----K--DS---ERPSGIPERFSGSSS--GTTVTLT------ISGAQVEDEADYYCYS
AADNN--
>V62RF-CABD02231415.1-iglv |(2745, 3048)|2.64640065147|(0.981,0.805,0.977)|1
----SEASYELTQ-PPSVSVSLGQTARITCSG------EELPKKYAYWYQQKPGQSPVLV
IY----K--DS---ERPSGIPERFSGSSS--GTTVTLT------ISGVQAEDEADYYCLS
ADSSDTY
>V66RF-CABD02231419.1-iglv |(2003, 2306)|2.79506971828|(0.979,0.944,0.901)|1
----SWAQSALTQ-PPSVSGSPGQSVTISCTGTSS---DIGGYNRASWYQQHPGKAPKLM
IY----E--VS---KRPSGVSNRFSGSKS--GNTASLT------ISGLQAEDEADYYCSS
YTSS---
>V67RF-CABD02231421.1-iglv |(1448, 1751)|2.85193423061|(0.986,0.976,0.912)|1
----SWAQSALTQ-PASVSGSPGQSITISCTGTSS---DVGGYNYVSWYQQHPGKAPKLM
IY----Y--VS---NRPSGVSNRFSGSKS--GNTASLT------ISGLQAEDEADYYCSS
YTSS---
>V68RF-CABD02231422.1-iglv |(7425, 7728)|2.77638394575|(0.985,0.886,0.949)|1
----SATSYELTQ-PHSVSVATAQTARITCGG------NNIGSKAVHWYQQKPGQDPVLV
IY----S--DS---NRPSGIPERFSGSNS--GNTATLT------ISRIEAGDEADYYCQV
WDSSSDH
>V69RF-CABD02231427.1-iglv |(14063, 14366)|2.88552036441|(0.994,0.936,0.971)|1
----SEASYELTQ-SPSVSVSPGQTARITCSG------DALPKKYAYWYQQKPGQAPVLV
IY----E--DS---KQPSGIPERFSGSSS--GTMATLT------ISGAQVEDEADYYCYS
TDSSGNH
>V70RF-CABD02231427.1-iglv |(25067, 25377)|2.60944634762|(0.841,0.913,0.883)|1
----SWAQSALIQ-PPSASGSPGQSVTISCTGTSS---DIGGYNYVSWYQRHPGKAPKLM
IY----E--VS---NRPSGVPNRFSGSKS--GNTASLT------ISGLQAEDEADYYCCS
YAGSNN-
>V71RF-CABD02231431.1-iglv |(3583, 3874)|2.91252788906|(0.990,0.967,0.961)|1
----SVASYELTQ-PPSVSVSPGQTASITCSG------DKLGDEYAYWYQQKPGQSPVLV
IY----Q--DS---KRPSGIPERFSGSNS--GNTATLT------ISGTQAMDEADYYCQA
WDS----
>V73RF-CABD02352480.1-trbv |(136, 449)|2.55557726394|(0.901,0.942,0.778)|1
-----PIDTEVTQTPKHLVMGMTNKKSLKCEQHMG-------HRAMYWYKQKAKKPPELM
FVYSYE---KLS--VNESV-PSRFSPECPN-NSLLNLH------LHALQPEDSALYLCAS
SQDTALQ
>V75RF-CABD02352482.1-trbv |(248, 545)|2.81776208464|(0.908,0.976,0.965)|1
-----PVNAGVAQTPKFQVLKTGQSMTLQCAQDMN-------HNSMYWYRQDPGMGLRLI
YYSAAEG--T----TAKGEVPDGYNVSRLN-KREFSLR------LESAAPSQTSVYFCAS
SE-----
>V76RF-CABD02352488.1-trbv |(3197, 3494)|2.75616889119|(0.966,0.917,0.900)|1
-----PVNAGVTQTPKFHVLKTGQSMTLLCAQDMN-------HEYMYWYRQDPGMGLRLI
HYSVGEG--T----TAKGEVPDGYNVSRLK-KQNFLLG------LESAAPSQTSVYFCAS
SY-----
>V77RF-CABD02352491.1-trbv |(2383, 2680)|2.6397050841|(0.916,0.945,0.819)|1
-----PLDTAVSQTPKYLVTQMGKKESLKCEQNLG-------HNAMYWYKQDSKKFLKTM
FIYSNK---EPI--LNETV-PNRFSPDSPD-KAHLNLH------INSLELGDSAVYFCAS
SQ-----
>V78RF-CABD02352492.1-trbv |(775, 1088)|2.48760962185|(0.956,0.896,0.774)|1
-----PMEMGVTQTPRHLVMGMTNKKSLKCEQHLG-------HNAMYWYKQSAKKPLELM
FVYSLE---ERV--ENNSV-PSRFSPECPN-SSHLFLH------LHALQPEDSALYLCAS
SQDTALQ
>V79RF-CABD02352493.1-trbv |(4882, 5179)|2.65569097572|(0.884,0.974,0.838)|1
-----PVDAGVTQTPKFQVLKTGQSMTLQCAQDMN-------HNYMYWYRQDPGKGLRLI
HYSAGEG--T----TAKGEVPDGYNVSRLN-TQNFLLR------LELAARSQTSVYFCAT
SE-----
>V80RF-CABD02352494.1-trbv |(447, 747)|2.54436655351|(0.894,0.865,0.814)|1
-----HTRAGVSQSPSNKVTEKGKDVVFRCDPISG-------HSVLYWYQQSLGQGLEFL
IYFQGN---SAP--DKSGLPSDRFSAERTG-GSVSTLT------IQRTQQEDSAMYLCAS
SL-----
>V82RF-CABD02352499.1-trbv |(1151, 1451)|2.53982533948|(0.960,0.963,0.762)|1
-----HTGAGVSQTPSNKVTEKGKDVELRCDPISG-------HTALYWYRQSLGQGPEFL
IYFQGT---GAT--DDSGLPNDRFFAVRPE-GSVSTLK------IQRTEQGDSAVYLCAS
SL-----
>V84RF-CABD02352499.1-trbv |(8716, 9012)|2.697156596|(0.904,0.871,0.929)|1
-----PVDSGVTQTPKHLITATGQRVTLRCSPRSG-------DLSVYWYQQSLDQGLQFL
IQYYNGE---ER--AK-GNILERFSAQQFP-DSHSELN------LSSLELGDSALYLCAS
SV-----
>V88RF-CABD02352501.1-trbv |(16783, 17080)|2.44887343065|(0.965,0.978,0.720)|1
-----PVNAGVTQTPKFQVLKTGQSMTLQCAQDMN-------HDYMYWYRQDPGMGLRLI
HYSVGAG--I----TDKGEVPNGYNVSRSN-TEDFPLR------LQSAAPSQTSVYFCAS
SY-----
>V89RF-CABD02352502.1-trbv |(788, 1088)|2.64277338538|(0.956,0.941,0.819)|1
-----HTGAGVSQSPRYKVAKRGRDVALRCDSISG-------HVTLYWYRQTLGQGSEVL
TYFRSD---AQR--DKSGRPSGRFSAERPE-RSVSTLK------IQRTEQGDSAVYLCAS
SL-----
>V90RF-CABD02352503.1-trbv |(2597, 2893)|2.4490022856|(0.948,0.810,0.824)|1
-----SVETGVTQSPTHLIKTRGQQVTLRCSPQSG-------HNTVSWYQQALGQGPQLI
FQYYREE---EN--GR-GNFSPRFSGRQFP-NYSSELN------VNALELDDSALYLCAS
SL-----
>V91RF-CABD02352508.1-trbv |(1078, 1374)|2.66596254683|(0.954,0.833,0.937)|1
-----PVDAGVTQSPTHLIKTRGQQVTLRCSPQSG-------HNTVSWYQQALGQGPQFI
FEYYEKE---ER--GR-GNFPDRFSARQFP-NYSSELN------VNALLLGDSALYLCAS
SL-----
>V94RF-CABD02352509.1-trbv |(10643, 10939)|2.81382475433|(0.962,0.930,0.930)|1
-----LVDAGVTQSPTHLIKTRGQQVTLRCSPKSG-------HDTVSWYQQALGQGPQFI
FQYYEEE---ER--QR-GNFPDRFSGHQFP-NYSSELN------VNALLLGDSALYLCAS
SL-----
>V95RF-CABD02352510.1-trbv |(11938, 12229)|2.47862635215|(0.941,0.825,0.821)|1
-------NAGVTQTPKFHILKTGQSMTLQCAQDMN-------HGYMSWYRQDPGMGLRLI
YYSAAAG--T----IDKGEVPNGYNVSRLN-TEDFLLR------PVSAAPSQTSVYFCAS
SY-----
>V96RF-CABD02352511.1-trbv |(3159, 3459)|2.67873070067|(0.880,0.910,0.893)|1
-----HTGAGVSQSPRYKVTKRGQDVTLRCDPISS-------HATLYWYQQALGQGPEFL
TYFNYE---AQP--DKSGLPNDRFSAERPE-GSNSTLT------IQRTEQRDSAMYLCAS
SL-----
>V98RF-CABD02352511.1-trbv |(25598, 25898)|2.83653571945|(0.932,0.978,0.935)|1
-----HADTGVSQDPRHKITKRGQNVTFRCDPISE-------HNQLYWYRQTLGQGPEFL
TYFQNEA---QL--EKSRLLSDRFSAERPK-GSFSTLE------IQRTEQGDSAMYLCAS
SL-----
>V99RF-CABD02352512.1-trbv |(835, 1135)|2.83653571945|(0.932,0.978,0.935)|1
-----HADTGVSQDPRHKITKRGQNVTFRCDPISE-------HNQLYWYRQTLGQGPEFL
TYFQNEA---QL--EKSRLLSDRFSAERPK-GSFSTLE------IQRTEQGDSAMYLCAS
SL-----
>V100RF-CABD02352512.1-trbv |(7390, 7687)|2.66636983081|(0.934,0.821,0.965)|1
-----SVAAGVIQSPRHLIKEKRETATLKCYPIPR-------HDTVYWYQQGPGQDPQFL
ISFYEKM---QS--DK-GSIPDRFSAQQFS-DYHSELN------MSSLELGDSALYFCAS
SL-----
>V101RF-CABD02352513.1-trbv |(1353, 1650)|2.80403487493|(0.945,0.960,0.906)|1
-----HMDAGITQSPRHKVTEIGTPVTLRCHQTEN-------HRYMYWYRQDPGHGLRLI
HYSYGVK--D----TDKGEVSDGYSVSRSK-TEDFLLT------LESATSSQTSVYFCAI
SE-----
>V102RF-CABD02352514.1-trbv |(8741, 9041)|2.48382797528|(0.938,0.774,0.885)|1
-----LIEAGVVQSPRYKIIEKKQPVAFWCNPISG-------HNTLYWYRQNLGQGPELL
IRYENE---EAV--DDSQLPKDRFSAERLK-GVDSTLK------IQPAELGDSAVYLCAS
SL-----
>V103RF-CABD02352514.1-trbv |(14343, 14643)|2.48239731778|(0.967,0.938,0.751)|1
-----HTDAGVIQSPRHEVTEMGQEVTLRCKPISG-------HNSLFWYRQTMMRGLELL
IYFNNN---VPI--DDSGMPKDRFSAKMPN-ASFSTLK------IQPSEPRDSAVYFCAS
SL-----
>V104RF-CABD02352515.1-trbv |(2177, 2477)|2.49572120358|(0.952,0.938,0.753)|1
-----HTDAGVIQSPRHEVTEMGQEVTLRCKPISG-------HNSLFWYRQTMMRGLELL
IYFNNN---VPI--DDSAMPKDRFSAKMPN-ASFSTLK------IQPSEPRDSAVYFCAS
SL-----
>V105RF-CABD02352520.1-trbv |(3657, 3957)|2.59254203176|(0.934,0.891,0.823)|1
-----HIEAGVTQFPSHSVIEKGQTVTLRCDPISG-------HDNLYWYRRVMGKEIKFL
LHFVKES---KQ--DESGMPNNRFLAERTG-GTYSTLK------VQPAELEDSGVYFCAS
SQ-----
>V107RF-CABD02352525.1-trbv |(5450, 5746)|2.56816566048|(0.917,0.857,0.835)|1
-----LSNAGVMQNPRHLVRRRGQEARLRCSPMKG-------HSHVYWYRQLPEEGLKFM
VYLQKE---NII--DESGMPKERFSAEFPK-EGPSILR------IQQAVRGDSAAYFCAS
S------
>V108RF-CABD02352526.1-trbv |(2325, 2622)|2.73929648886|(0.905,0.896,0.945)|1
-----TVDGGITQSPKYLFRKEGQNVTLNCEQNLN-------HDAMYWYRQDPGQGLRLI
YYSQIVN--D----FQKGDIAEGYSVSREK-KESFPLT------VTSAQKNPTAFYLCAS
SI-----
>V111RF-CABD02352526.1-trbv |(29242, 29542)|2.61574282068|(0.909,0.922,0.818)|1
-----SFHAKVTQTPGHLVKGKGQKTKMDCTPEKG-------HTFVYWYQQNQNKEFMLL
ISFQNEQ---VL--QETEMHKKRFSSQCPS-NTPCSLA------ILSSEPGDTALYLCAS
SQ-----
>V112RF-CABD02352529.1-trbv |(2516, 2814)|2.62006085876|(0.908,0.903,0.832)|1
-----SMDADVTQTPRNRITKTGKRIMLECSQTKG-------HDRMYWYRQDPGLGLRLI
YYSFDVK--D----INKGEISDGYSVSRQA-QAKFSLS------LESATPNQTALYFCAT
SD-----
>V114RF-CABD02352531.1-trbv |(24520, 24817)|2.47997353228|(0.849,0.925,0.760)|1
-----PLEAQVTQNPRYLITVTGKKLTVTCSQNMN-------HEYMSWYRQDPGLGLRQI
YYSINVE--A----IDKGDVPEGYNVSRKE-KRNFPLI------LESPSPNQTSLYFCAS
SL-----
>V115RF-CABD02352532.1-trbv |(6479, 6776)|2.66328299872|(0.880,0.872,0.917)|1
-----LVDVKVTQSSRYLVKRMGEKVFLECVQDMD-------HENMFWYRQDPGLGLRLI
YFSSDVK--M----KEKGDIPEGYSVSREK-KERFSLI------LESTSTNQTSMYLCAS
SL-----
>V116RF-CABD02377004.1-trbv |(3098, 3398)|2.58196782636|(0.871,0.809,0.932)|1
-----SMDTKVTQRPRLLVKANEQKAKMDCVPIKR-------HSYVYWYHKTLEEELKFL
IYFQNEE---II--QKAEIINERFSAQCPQ-NSPCTLE------IQSTESGDTARYFCAN
SK-----
>V118RF-CABD02377005.1-trbv |(21584, 21875)|2.44465744694|(0.827,0.812,0.808)|1
-----LMEAEIYQTPRYHVIGTGKKITLECSQTMG-------HDKMYWSRSRNGITPHPP
FLW--VN--S----TEKGDLSSESTVSRIR-IEHFPLT------LESASPSHTSQYLCAS
SE-----
>V119RF-CABD02377030.1-trbv |(2304, 2607)|2.43724715516|(0.819,0.794,0.827)|1
----SVFSAVISQKPSRDICQRGTSMTIQCQVNSQ-------VTMMFWYCQQPGQSVTLI
ATANQGS--EAT--YESGFVIDKFPISCPN-LTFSTLT------VSNRSPEDSSIYLCSV
E------
>V120RF-CABD02105639.1-trdv |(1838, 2144)|2.22631178023|(0.776,0.662,0.934)|-1
---RGMLCDKVTQSSPDQTVASGSEVVLLCTYDTV-----YSNPDLFWYRIRPDYSFQFV
FYGDNSG--SQAADFTQGRFSVKHILT----QKAFHLV------ISPVRTEDSATYYCAF
-------
>V121RF-CABD02117385.1-ighv |(3331, 3640)|2.96680866856|(0.994,0.977,0.997)|-1
----AHSQVQLVQ-SGAEVKKPGASVKVSCKASGYTF-T---GYAMHWVRQAPGQRLEWM
GWINTG-N-GNT--KYSQKFQGRVTITRDTSASTAYME------LSSLRSEDTAVYYCAR
-------
>V123RF-CABD02117395.1-ighv |(10192, 10503)|2.9283033276|(1.000,0.985,0.953)|-1
----VQCEVQLVE-SGGGLVQPGRSLRLSCVASGFTF-D---DYAMHWVRQAPGKGLEWV
SGISWNS--GST--GYADSVKGRFTISRDNAKNSLYLQ------MNSLRAEDTALYYCAK
D------
>V125RF-CABD02117398.1-ighv |(503, 809)|2.86217712368|(0.930,0.998,0.955)|-1
----VQCEVQLVE-SEGGLVQPGGSLRLSCAASGFTF-S---SYNMHWVRQAPGKGLEWV
SAIGTG---GDT--YYPGSVKGRFTISRENAKNSLYLQ------MNSLRAEDTAVYYCAR
-------
>V126RF-CABD02117416.1-ighv |(7584, 7893)|2.94334298516|(0.993,1.000,0.956)|-1
----VQCEVQLVE-SGGGLVQPGGSLRLSCAASGFTF-S---DYYMSWVRQAPGKGLEWV
SGINWN--GGST--GYADSVKGRFTISRNNAKNSLYLQ------MNSLRAEDTALYYCAR
-------
>V127RF-CABD02117419.1-ighv |(907, 1216)|2.99796800026|(0.998,1.000,1.000)|-1
----VQCEVQLVE-SGGGLVKPGGSLRLSCAASGFTF-S---SYWMSWVRQAPGKGLEWV
SVISSS--GRTT--YYADSVKGRFTISRDNAKNSLYLQ------MNSLRAEDTAVYYCAR
-------
>V128RF-CABD02117420.1-ighv |(2703, 3012)|2.98259608|(0.998,0.988,0.997)|-1
----VQCDVQLVE-SGGGLVQPGGSLRLSCAASGFTF-S---SYGMSWVRQAPGKGLEWV
SYISSS--SSYI--YYADSVKGRFTISRDNAKNSLYLQ------MNSLRAEDTAVYYCAR
-------
>V129RF-CABD02117421.1-ighv |(1503, 1818)|2.87184558231|(0.990,0.986,0.917)|-1
----AQCEVQLVE-SGGGLVKPGGSLRLSCAASGFTF-S---NYYMEWVRQAPGKGLEWV
GFIRTKAKGGTT--EYAASVKGRFTISRDDSKSIAYLQ------MNSLKTEDTAVYYCTR
-------
>V132RF-CABD02117431.1-ighv |(1312, 1621)|2.86769746084|(0.995,0.985,0.914)|-1
----AHSQVQLVQ-SGSEVKKPGASVKVSCKASGYTF-T---SYGMNWVRQAPGQGLEWM
GWINTY-T-GNP--TYAQGFTGRFVFSMDTSVSTAYLQ------ISSLKAEDTAMYYCAR
-------
>V135RF-CABD02117442.1-ighv |(1416, 1725)|2.89051087214|(0.944,0.960,1.000)|-1
----VQCQVQLVE-SAGGVVQPGRSLTLSCTASGFTF-S---SYGMHWVRQAPGKGLEWV
AVISYD-A-SNK--YYAASVKGRFTISRDNSKNTLYLQ------MNSLRAEDTAVYYCAK
-------
>V136RF-CABD02117444.1-ighv |(7682, 7991)|2.99496000066|(0.997,0.998,1.000)|-1
----VQCQVQLVE-SGGGVVQPGRSLRLSCTASGFTF-S---SYGMHWVRQAPGKGLEWV
AVISYD--ASNK--YYADSVKGRFTISRDNSKNTLYLQ------MNSLRAEDTAVYYCAK
-------
>V139RF-CABD02117457.1-ighv |(5100, 5407)|2.88264949271|(0.986,0.991,0.922)|-1
----VQCEVQLVE-SGGGLVQPEGSLKLSCAASGFTF-S---SYAMDWVRQAPGKGLEWV
AHIWND-G-SQK--YYADSVKGRFTISRDNSKSMLYLQ------MDSLKAEDTAMYYCT-
-------
>V142RF-CABD02117467.1-ighv |(15696, 16005)|2.947794597|(0.997,0.976,0.978)|-1
----AHSQVQLVQ-SGAEVKKPGASVKVSCKASGYTF-T---SYYMHWVRQAPGQGLEWM
GIINPS-G-GST--SYAQKFQGRVTMTRDTSTSTVYME------LSSLRSEDTAVYYCAR
-------
>V143RF-CABD02117467.1-ighv |(19808, 20117)|2.91090442409|(0.978,0.963,0.971)|-1
----AYSQMQLVQ-SGAEVKKTGASVKVSCKASGYTF-T---YRSLHWVRQAPGQALEWM
GWITPY-N-GNT--NYAQKFQDRVTITRDRSMSTAYME------LSSLRSEDTAVYYCAR
-------
>V144RF-CABD02117471.1-ighv |(687, 996)|2.90787897521|(0.991,0.982,0.944)|-1
----VQCDVQLVQ-SGGGLVQPGGSLRLSCAASGFTF-S---SYWMHWVRQAPGKGLEWV
ANIKKD--GSGK--YYVDSVKGRFTISRDNAKNSLYLQ------MNSLRAEDTAVYYCAR
-------
>V145RF-CABD02117473.1-ighv |(12286, 12601)|2.95802424585|(0.979,0.991,0.989)|-1
----VQCEVQLVE-SGGGLVKPGGSLRLSCTASGFTF-G---DYTMSWVRQAPGKGLEWV
GFIRSKAYGGTT--EYAASVKGRFTISRDDSKSIAYLQ------MNSLKTEDTAVYYCTT
-------
>V148RF-CABD02117477.1-ighv |(2704, 3013)|2.95630128432|(0.991,0.996,0.971)|-1
----VQCEVQLVE-SGGGLVQPGGSLRLSCVASGFTF-S---SYAMSWVRQAPGKGLEWV
STISST-G-GST--WYPGSVKGRFTISRDNSKNTLYLQ------MNSLRAEDTAVYYCAK
-------
>V150RF-CABD02117482.1-ighv |(11133, 11445)|2.96807224753|(1.000,0.973,0.998)|-1
----VLSQVQLQE-SGPGLVKPSQTLSLTCTVSGGSI-S-SGSYYWSWIRQPPGKGLEWI
GYIYYS---GST--NYNPSLKSRVTISVDTSKNQFSLK------LSSVTAADTAVYYCAR
-------
>V151RF-CABD02117482.1-ighv |(15935, 16229)|2.90156465803|(0.986,0.966,0.955)|-1
---------QLVQ-SGPEVKKPGASVKVSCKASGYTF-T---SSAMQWVRQAPGQGLEWI
GWIIVG-S-GNT--NYAQKFQGRVTITRDTSTSTAYME------LSSLRSEDMAVYYCAA
-------
>V152RF-CABD02117487.1-ighv |(1480, 1789)|2.9919000027|(0.995,0.999,0.998)|-1
----VQCEVQLVE-SGGGLVQPGGSLRLSCAASGFTF-S---SYHMSWVRQAPGKGLEWV
SVIYSD--GSST--YYAASVKGRFTISRDNSKNTLYLQ------MNSLRAEDTAVYYCAR
-------
>V153RF-CABD02117492.1-ighv |(7493, 7808)|2.89686871865|(0.982,0.986,0.937)|-1
----VQCEVQLVE-SGGGLVQPGGSLRLSCAASGFTF-S---NYYKSWVCQAPGKGLEWV
RFIRNKANGGTT--EYTTSVKGRFTISRDDSKSITYLQ------MNSLKTEDTAVYYCSR
-------
>V154RF-CABD02117494.1-ighv |(3416, 3731)|2.95061102934|(0.967,0.999,0.991)|-1
----VQCEVQLLE-SGGGLVQPGGSLRLSCAASGFTF-S---DHYMDWVRQAPGKGLEWV
GRIRNKANSYTT--EYAASVKGRFTISRDDSKNSLYLQ------MNSLKTEDTAVYYCTT
-------
>V155RF-CABD02117499.1-ighv |(3042, 3351)|2.97380255864|(0.979,0.999,0.999)|-1
----VQCEVQLLE-SGGGLVQPGGSLRLSCAASGFTF-S---SYWMHWVRQAPGKGLEWV
SRINSD--GSST--SYADSVKGRFTISRDNAKNTLYLQ------MNSLRAEDTAVYYCAR
-------
>V158RF-CABD02117766.1-ighv |(420, 729)|2.86636319834|(0.974,0.940,0.958)|-1
----AHSQVQLVQ-SGAEVKKPGASVKVSCKASGYTF-T---DYYMHWVRQAPGQGLEWM
GRINPN-S-GGT--NYTQKFQGRVTMTRDTSISTAYME------LSRLRSEDTATYYCAR
-------
>V159RF-CABD02117767.1-ighv |(2221, 2530)|2.9291290053|(0.967,0.985,0.979)|-1
----AHSQVQLVQ-SGAEVKKPGASVKVSCKASGYTF-T---GYYMHWVRQAPGQGLEWM
GWINPN-S-GGT--NYAQKFQGRVTMTRDTSISTAYME------LSRLRSEDTATYYCTR
-------
>V161RF-CABD02136430.1-ighv |(37941, 38248)|2.95778801933|(0.989,0.982,0.987)|-1
----AQCEVQLVE-SGGGLVQPGGSLRLSCAASGFTF-S---NHYTSWVLQAPGKGLEWV
SYISGD-S-DYT--NYADSVKGRFTISRDNAKNSLYLR------MNSLRAEDTAVYYCV-
-------
>V163RF-CABD02196513.1-igkv |(3814, 4114)|2.94076801985|(0.977,0.980,0.984)|-1
----AKCDIQMTQSPSTLSASVGDRVTITCRASQGIS------KLLAWYQQKPGKAPKLL
IY----A--AS---SLESGVPSRFSGSGS--GTEFTLT------ISSLQPDDFATYYCQQ
HSSTP--
>V164RF-CABD02196515.1-igkv |(8253, 8553)|2.72496508784|(0.996,0.832,0.999)|-1
----ARCDIRMTQSPSSLSASVGDRVTITCRASQGIR------NDLGWYQQKPGKAPKIL
IY----A--AS---SLQSGVPSRFSGSGS--GTDFTLT------ISSLQPEDFATYYCLQ
DYNYP--
>V166RF-CABD02196521.1-igkv |(5557, 5857)|2.96860007999|(0.993,0.993,0.983)|-1
----ARCDIQMTQSPSSLSASVGDRVTITCRASQGIS------KWLAWYQQKPGKAPKRL
IY----A--AS---SLESGVPSRFSGSGS--GTEFTLT------ISSLQPEDFATYYCLQ
YNSYP--
>V169RF-CABD02196547.1-igkv |(2239, 2541)|2.85563475291|(0.980,0.924,0.965)|-1
----SSGDVVMTQSPLSLPVTLGQPASISCRSSQSLVY-SDGNTYLNWFQQKPGQSPRRL
IY----K--VS---NRDSGVPDRFSGSGS--GTDFTLE------ISRVEAEDVGVYYCMQ
G------
>V170RF-CABD02196553.1-igkv |(790, 1090)|2.86026649556|(0.992,0.910,0.985)|-1
----ARCDIQLTQSPTSLSASVGDRVTITCQASQGIS------NNLAWYQQKPGKVPKLL
IY----S--AS---SLQSGVPSRFSGSGS--GTDFTLT------ISSLQPEDVATYYCQR
TYNAP--
>V171RF-CABD02196556.1-igkv |(192, 492)|2.96688223716|(0.997,0.998,0.974)|-1
----ARCDIQMTQSPSSLSASVGDRVTITCRASQSVS------NYLSWYQQKPGKAPKLL
IY----A--AS---SLQSGVPSRFSGSGS--GTDFTLT------ISSLQPEDFATYYCQH
GYGTP--
>V173RF-CABD02196901.1-igkv |(2814, 3114)|2.95552296609|(1.000,0.963,0.998)|-1
----DRCDIQMTQSPSSLSASVGGRVTITCRASQGIS------NNLNWYQQKPGKTPKLL
IY----A--AS---SLQSGIPSRFSDSGS--GTDYTLT------ISSLQPEDFAAYYCQQ
SDSTP--
>V177RF-CABD02337338.1-trgv |(1057, 1370)|2.80447706835|(0.973,0.950,0.903)|-1
----SQKSSNLEGRTKSVTRQTGSSAEITCDLTVT-----N-TFYIHWYLHQEGKAPQRL
LYYDVST--ARD-VLESGLSSGKYYTHTPR-RWSWILR------LQNLIENDSGVYYCAT
WD-----
>V179RF-CABD02337341.1-trgv |(2313, 2626)|2.63752579019|(0.961,0.818,0.939)|-1
----SQKSSNLEGRTKSVIRQTGSSAEITCDLDGG-----S-TGYIHWYLHQEGKAPQRL
QYYDSYN--SKV-VLESGVSPGKYYTYTST-RKNLRLI------LRNLIENDSGVYYCAT
WD-----
>V181RF-CABD02379427.1-igkv |(3027, 3327)|2.99798400013|(1.000,1.000,0.998)|-1
----ARCDIQMTQSPSSLSASVGGRVTITCRASQGIS------NNLNWYQQKPGKTPKLL
IY----A--AS---SLQSGIPSRFSDSGS--GTDYTLT------ISSLQPEDFAAYYCQQ
SDSTP--
>V182RF-CABD02379503.1-igkv |(6201, 6501)|2.96063747374|(1.000,0.967,0.998)|-1
----ARCDIQMTQSPSSLSASVGGRVTITCRASQDIS------NNLNWYQQKPGKTPKLL
IY----A--AS---SLQSGIPSRFSDSGS--GTDYTLT------ISSLQPEDFAAYYCQQ
SDSTP--
>V2RF-AQIA01007574.1-iglv |(14067, 14370)|2.83083948459|(0.986,0.911,0.959)|1
----SWAQAAPTQ-PPSVSGSPGQSVTISCTGTSS---DIGGYNRVSWYQQHPGKAPKLM
IY----E--VS---KRPSGVSDRFSGSKS--GNTASLT------ISGLQAEDEADYYCSS
YAGS---
>V4RF-AQIA01007574.1-iglv |(37774, 38077)|2.8281344055|(0.940,0.915,0.983)|1
----SAASYELTQ-PPSVSVSPGQTARITCSG------DALPKKYAYWFQQKPGQSPVLI
IY----E--DS---KRPSGIPERFSGSSS--GTVATLT------ISGAQVEDEADYYCYS
TDSSGNH
>V6RF-AQIA01007574.1-iglv |(48578, 48881)|2.80620443258|(0.994,0.928,0.922)|1
----SWAQAALTQ-PPSVSGSPGQSVTISCTGTSS---DIGGYNRVSWYQQHPGKAPKLM
IY----E--VS---KRPSGVSDRFSGSKS--GNTASLT------ISGLQAEDEADYYCSS
YASS---
>V7RF-AQIA01007575.1-iglv |(6771, 7074)|2.91152806591|(0.993,0.957,0.969)|1
----SWAQAALTQ-PPSVSGSPGQSVTISCTGTSS---DVGGYNYVSWYQQHPGKAPKLM
IY----D--VS---KRPSGVSDRFSGSKS--GNTASLT------ISGLQAEDEADYYCSS
YAGS---
>V9RF-AQIA01007576.1-iglv |(8743, 9046)|2.799864822|(0.985,0.914,0.932)|1
----SAVSYELTQ-PPSVSVSPGQTARITCGG------DNLGSKYVHWYQQKPAQAPVLV
IY----Y--DS---DRPSGIPERFSGSKS--GNTATLT------ISGVEAGDEADYYCQV
WDSSSDH
>V11RF-AQIA01007576.1-iglv |(19712, 20015)|2.84904856847|(0.991,0.922,0.959)|1
----SWAQAALTQ-PRSVSGSPGQSVTISCTGTSS---DIGGYNYVSWYQQHPGTAPKLM
IY----E--VS---KRPSGVSDRFSGSKS--GNTASLT------ISGLQAEDEADYYCCS
YAGS---
>V14RF-AQIA01007576.1-iglv |(45242, 45545)|2.70324853765|(0.945,0.847,0.949)|1
----SVVSSELTQ-DPAVSVALGQTVRITCQGDSL---R---SYYASWYQQKPGQAPVLV
VY----G--NN---NRPSGIPERFSGSSS--GNTASLT------ITGAQVEDEADYYCDS
WDSSGTH
>V16RF-AQIA01007576.1-iglv |(72187, 72490)|2.7790705812|(0.962,0.878,0.967)|1
----SATSYELTQ-PPSVSAASGQTARITCGG------DNIGSKNVQWYQQKPAQAPVLV
IY----A--DS---DRPSGIPERFSGSNS--GNTATLT------ISGVEAGDEADYYCQV
WDSSSDH
>V18RF-AQIA01007584.1-iglv |(1279, 1588)|2.83874179091|(0.972,0.936,0.940)|1
----SWAQSVLTQ-PPSASEAARKSVTISCSGSSS---NIG-SNSVSWYQQLPGTAPKLL
IY----Y--ND---QRASGVSDRFSGSKS--GTSASLA------ISGLQTEDEADYYCAA
WDDSLSG
>V21RF-AQIA01007586.1-iglv |(17179, 17489)|2.74326541037|(0.955,0.897,0.912)|1
----SLSQPVLTQ-PTSLSASPGASARLSCTLSSG---INVGSYSIYWYQQKPGSPPRYL
LYYYSDS--SK---HQGSGVPSRFSGSKDASANAGLLL------ISGLQSEDEADYYCAI
-------
>V22RF-AQIA01007586.1-iglv |(27894, 28201)|2.62102134678|(0.900,0.805,0.972)|1
----SWAQSVLTQ-PPSVSAVPGQKVTISCSGSSS---NIG-RSCVSWYQQVPGTAPKLL
IY----Q--DN---KRPSGVSDRFSGSKS--GTSASLA------ITGLQTGDEADYYCSA
WDSSLS-
>V23RF-AQIA01007586.1-iglv |(32056, 32365)|2.66638325905|(0.906,0.935,0.844)|1
----SWAQSVLTQ-PPSVSGDPGQRVTISCTGSSS---NIG-GYDVYWYQQLPGTAPKLL
IY----E--NN---KRPSGVSDRFSGSKS--GTSASLA------ITGLQSEDEAEYYCET
WDNSLNG
>V24RF-AQIA01007586.1-iglv |(37066, 37373)|2.77341837656|(0.978,0.891,0.940)|1
----SWAQSVLTQ-PPSVSGDPGQRVTISCTGSSS---NIG-GYYVYWYQQFPGTAPKLL
IY----D--NN---KRPSGVSDRFSGSKS--GTSASLT------ITGLQPGDEADYYCGA
WDSSLS-
>V25RF-AQIA01007586.1-iglv |(42885, 43192)|2.85545134312|(0.978,0.941,0.946)|1
----SWAQSVLTQ-PPSVSGAPGQRVTISCTGSSS---NIG-GYYVSWYQQLPGTTPKLL
IY----Q--DN---KRPSGVSDRFSGSKS--GTSASLT------ITGLQTEDEADYYCLS
YDSSLS-
>V27RF-AQIA01007587.1-iglv |(10143, 10452)|2.88922051637|(0.982,0.942,0.972)|1
----SWAQSVLTQ-PPSASGAPGQSVTISCSGSSS---NIG-SNYVNWYQQLSGKAPKLL
IY----N--NN---QRPSGVPDRFSGSKS--GTSASLA------ISGLQSEDEADYYCAA
WDSSLSG
>V28RF-AQIA01007588.1-iglv |(1406, 1715)|2.88223918747|(0.990,0.934,0.972)|1
----SWAQSVLTQ-PPSASGAPGQSVTISCSGSSS---NIG-SNDVYWYQQFPGTAPKLL
IY----Y--SN---QRPSGVPDRFSGSKS--GTSASLA------ITGLRSEDEADYYCAA
WDDSLSS
>V32RF-AQIA01007589.1-iglv |(4140, 4447)|2.89938935955|(0.984,0.961,0.959)|1
----SWAQSVLTQ-PPSVSGAPGQRVTISCTGSSS---NIG-GYYVQWYQQLPGTAPKLL
IY----E--NN---KRPSGVSDRFSGSQS--GTSASLT------ITGLQSEDEADYYCQS
YDSSLS-
>V34RF-AQIA01007589.1-iglv |(26788, 27098)|2.76062284503|(0.963,0.908,0.912)|1
----SLSQPVLTQ-PTSLSASPGASARLTCTLSSG---ISVGSYRIFWYQQKPGSPPRYL
LNYHTDS--DK---HQGSGVPSRFSGSKDASANAGILL------ISGLQSEDEADYYCMI
-------
>V35RF-AQIA01007590.1-iglv |(12131, 12441)|2.83397825001|(0.950,0.918,0.972)|1
----SWAEVVFTQ-PHSVSGSPGQTVTISCTRSSG---SIG-SSYVYWYQQRPGSAPTTV
IY----K--DN---QRPSGVPDRFSGSIDSSSNSASLT------ISGLKSEDEADYYCQS
YDSSG--
>V39RF-AQIA01007600.1-iglv |(7012, 7324)|2.78219505434|(0.941,0.880,0.983)|1
----SWAEVVFTQ-PHSVSGSPGQTVTISCTRSSG---SID-SKYVQWYQQRPGSAPTTV
IY----K--DN---QRPSGVPDRFSGSIDSSSNSASLA------ISGLKSEDEADYYCQS
ADGSYN-
>V41RF-AQIA01007605.1-iglv |(38320, 38626)|2.79855916475|(0.908,0.967,0.942)|1
-----DSETVVTQ-EPSLSVSPGGTVTLTCGLSSG---SVSTSNYPSWYQQTPGQAPRTL
IY----S--TN---TRPSGVPDRFSGSIL--GNKAALT------ITGAQADDESDYYCTL
YMGSGI-
>V43RF-AQIA01009600.1-iglv |(7837, 8140)|2.92045386218|(0.986,0.965,0.972)|1
----SWAQSAPTQ-PPSVSGSPGQSVTISCTGTSS---DVGGYNYVSWYQQHPGKAPKLM
IY----G--VS---KRPSGVSDRFSGSKS--GNTASLT------ISGLQAEDEADYYCCS
YTTS---
>V46RF-AQIA01009608.1-iglv |(4448, 4751)|2.71174714857|(0.959,0.870,0.920)|1
----SWAQSALTQ-PPSVSKSLGQSVTISCTGTSS---DIGGYNGVSWYQQHSGTAPRLL
IY----E--VS---KRPSGVSDRFSGSKS--GNTASLT------ISGLQAEDEADYYCCS
YRSG---
>V47RF-AQIA01017094.1-igkv |(176237, 176552)|2.66955212988|(0.989,0.941,0.837)|1
----SSGDIVMTQTPLSLSVTPGEPASISCRSSQSLLH-SNGYTYLHWYLQKPGQSPQLL
IY----L--VS---NRPSGVPDRFSGSGS--GTDFTLK------ISRVEAEDVGVYYCEQ
TLQTP--
>V48RF-AQIA01017096.1-igkv |(35522, 35822)|2.93891739643|(0.970,0.990,0.981)|1
----ARCDIQMTQSPSSLSASVGDRVTVTCRASQGIN------KELSWYQQKPGKAPTLL
IY----A--AS---SLQTGVSSRFSGSGS--GTDYTLT------ISSLQPEDVATYYCLQ
DYNTP--
>V56RF-AQIA01017097.1-igkv |(69341, 69641)|2.84679662698|(0.913,0.995,0.987)|1
----ARCDIQMTQSPSSLSASVGDTVTITCRASQGIN------NELAWYQQKPGKAPTLL
LY----S--GS---SLHTGVPSQFSGSGS--GTDFTLT------ISSLQPEDVATYYCRQ
DYNTP--
>V59RF-AQIA01017099.1-igkv |(19461, 19761)|2.94672550775|(0.972,0.992,0.985)|1
----ARCDIQMTQSPSALSASVGDRVTISCRASQNIY------SGLAWYQQKPGKAPKLL
IY----A--AS---RLQSGIPSRFSGSGS--GTDFTLT------ISSLQPEDSAAYYCQQ
VYSNP--
>V61RF-AQIA01017105.1-igkv |(1136, 1436)|2.97830822856|(0.998,0.985,0.996)|1
----ARCDIQMTQSPSSLSASVGDTVTITCRASQGIS------NDLAWYQQKPGETPKLL
IY----E--AS---SLQSGIPSRFSGSGS--GTDFTLT------ISSLQSEDFATYYCQH
YYSTP--
>V63RF-AQIA01017115.1-igkv |(12703, 13003)|2.81705802286|(0.993,0.881,0.992)|1
----ARCDIQMTQSPSSLSASVGDRVTITCRASENVN------NYLHWYQQKPGKAPKLL
IY----A--AS---TLQSGVPSRFSGSGS--GTDYTLT------ISSLQSEDVATYYCQH
SYGTP--
>V67RF-AQIA01017115.1-igkv |(73836, 74136)|2.9691523093|(0.996,0.992,0.982)|1
----ARCDIQMTQSPSSLSASVGDRVTITCRASQGIS------NWLAWYQQKPGKAPKLL
IY----R--AS---NLETGVPSRFSGSGS--GTDFTLT------ISSLQPEDIATYYCQQ
HDNSP--
>V71RF-AQIA01017140.1-igkv |(859, 1159)|2.85038299634|(0.967,0.937,0.951)|1
----AKCDIQMTQSPTFLSASVGDRVTIACRASQSIN------KGLAWYQQKPGKAPKLL
IS----Y--AS---NLYTDVPSRFSGSGS--GTDFTLT------ISSLQPEDAATYYCFQ
YNSYP--
>V73RF-AQIA01017150.1-igkv |(11178, 11496)|2.67765803168|(0.976,0.843,0.934)|1
----ACGDIVMTQSPDSLAVSLGERVTINCKSSQSLLYSSNNKNYLAWYQQKPGQAPKLL
IY----W--AS---TRESGVPNRFSGSGS--GTDFTLT------ISGLQAEDVAVYYCQQ
YYSTP--
>V75RF-AQIA01046502.1-trgv |(44235, 44548)|2.52079054371|(0.923,0.852,0.813)|1
----SQKSSNLEGRTKSVTRPTGSSAEITCDLPEV-----S-SFYIHWYLHQEGKAPQRL
LYYDSSN--SRV-VLESGISPGKYDTYGST-RSNLRLI------LRNLIENDSGVYYCAN
WD-----
>V76RF-AQIA01046502.1-trgv |(48629, 48942)|2.36723203636|(0.915,0.715,0.888)|1
----GQKSSNLEGITKSVTRPTGSSAEITCDFSGD-----S-NFYIHWYLHQEGKVPQRL
LYYDVSN--SRD-VLESGLSPGKYYTHTRT-RWSWILI------LRNLIENDSGVYYCAN
WD-----
>V77RF-AQIA01046502.1-trgv |(58146, 58459)|2.30507206634|(0.896,0.765,0.771)|1
----SQKSSNLEGRTKSVTRPTGSSAEITCDLPEV-----S-SFYIHWYLHQVGKAPQRL
LYYDTSN--SRV-VLESGISPGKYDSYGST-RNNLRLR------LRNLIENDSGVYYCAN
WD-----
>V80RF-AQIA01048525.1-trbv |(48020, 48317)|2.70843192639|(0.928,0.956,0.851)|1
-----PIDSGVTQTPKHLVMGMTNKKSLKCEQHMG-------HRAVYWYKQKVKKPPEIM
FMYNYEK---LS--IN-ESVPSRFSPECSQ-SSLFYLH------LRALQPEDSALYLCAS
SQ-----
>V84RF-AQIA01048525.1-trbv |(78854, 79151)|2.59394712206|(0.892,0.874,0.840)|1
-----PLDTAVFQTPKYLVTQMGKKESLKCEQNLG-------HDTMYWYKQDSKKLLKIM
FIYSNK---EPI--LNETV-PNRFSPESLD-KAHLNLH------IKSVELGDSAVYFCAS
SQ-----
>V85RF-AQIA01048525.1-trbv |(83218, 83515)|2.43260585713|(0.908,0.813,0.796)|1
-----PTDTGVTQTPKHLVMEMTNKKSLKCEQHMG-------HNAMYWYKQKAKKPPELM
FVYQYE---KLS--INESV-PSRFSPECSK-SSLLYLH------LRALQPEDSALYLCAS
SQ-----
>V87RF-AQIA01048526.1-trbv |(5857, 6154)|2.80375527321|(0.929,0.915,0.966)|1
-----PANADVTQSPKFQILKTGQSMTLQCAQDMN-------HNSMYWYRQDPGMGLRLI
HYSATED--T----TDPGEVPDGYSVSRLN-KKEFLLR------LESAALSQTSVYFCAS
SE-----
>V90RF-AQIA01048526.1-trbv |(35703, 36000)|2.71437468773|(0.912,0.957,0.863)|1
-----PVNAGVTQTPKFQVLKTGQNMTLKCAQDMN-------HDRMYWYRQDPGMGLRLI
HYSAGEG--S----TEKGEVPNGYNASRLN-KKDFLLR------LESAAPSQTSMYFCAS
SE-----
>V91RF-AQIA01048527.1-trbv |(3129, 3429)|2.54930576921|(0.928,0.853,0.829)|1
-----HTGAGVSQSPRNKVTEEGKDVVLRCDPISG-------HTALYWYRQSLGKGLEFL
IYFQGN---DAP--DKSGLPSGRFSAERTE-GSVSTLK------IQRTEQGDSAVYLCAS
SL-----
>V92RF-AQIA01048527.1-trbv |(25700, 26000)|2.50431013128|(0.921,0.924,0.759)|1
-----HTGAGVSQSPSNKVTEKGKDVELRCDPISG-------HAVLYWYRQNLGQGLEFL
IYFQGT---GAV--DDSGLRSDRVSATRPE-GSVSTLK------IQHTEQGDSAMYFCAS
SL-----
>V94RF-AQIA01048528.1-trbv |(7069, 7365)|2.63485507227|(0.903,0.880,0.861)|1
-----SVDCGVTQTPKHLITAIGQQVTLRCSPRSG-------DRSVYWYQQSLGQGLQFL
IQYYNGE---ER--AK-GNILERFSAQQFA-DLHSELN------LSSLELGDSALYFCAS
SE-----
>V99RF-AQIA01048530.1-trbv |(44934, 45231)|2.79164253497|(0.980,0.978,0.876)|1
-----PVNAGVTQTPKFQVLKTGQSMTLQCAQDMN-------HDYMYWYRQDPGMGLRLI
HYSVGEG--S----TEKGEVPDGYNVTRSN-TEDFPLR------LESAAPSQTSVYFCAS
SD-----
>V100RF-AQIA01048530.1-trbv |(49166, 49466)|2.6765028039|(0.909,0.842,0.950)|1
-----HTGAGVSQSPRYKVTKRGQDVALRCDPISG-------HDYLYWYQQALGQGPAFL
TYFQDD---AQR--DKSGLPNDRFSAERTE-GSVSTLK------IQRTEQGDSAVYLCAS
SL-----
>V103RF-AQIA01048530.1-trbv |(82295, 82592)|2.68945359449|(0.905,0.955,0.851)|1
-----LVNVGVTQTPKFQVLKTGQSMTVQCAQDMN-------HNFMYWYRQDPGMGLRLI
HYSGAAG--T----TDKGEVPSGYNVSRLN-TEDFPLR------LESADPSQTSVYICAS
SY-----
>V104RF-AQIA01048530.1-trbv |(86912, 87212)|2.72561393505|(0.930,0.879,0.927)|1
-----HTVARVSQSPRYKVTKRGQDVALRCDPISG-------HATLYWYQQALGQGPELL
TYFSYE---AQQ--DKSGLPSDRFSAERPE-GSVSTLK------IQRTQQGDSAVYLCAS
SL-----
>V105RF-AQIA01048530.1-trbv |(109105, 109405)|2.71436530313|(0.938,0.901,0.890)|1
-----HTGAGVSQSPRYKVTERGQDVALRCDPISG-------HDYLYWYQQALGQGPELL
TYFNYK---AQP--DKSGLPNDRFSAERPE-GSVSTLK------IQRTEQRDSAVYLCAS
SL-----
>V106RF-AQIA01048530.1-trbv |(114175, 114471)|2.56414349385|(0.931,0.840,0.851)|1
-----PVDAGVTQSPTHLIKTRGQQVTLRCSPISG-------HTSVSWYQQALGQGPQLI
FEYDRKE---ER--VR-GNFPDRFSGRQFP-NYSSELN------VNASEMGDSALYLCAS
SL-----
>V107RF-AQIA01048530.1-trbv |(120217, 120514)|2.50235688246|(0.848,0.803,0.860)|1
-----PGNAGVNQTPKFQVLKTGQSMTLQCAQDMN-------HECMSWYRQDPGMGLRLI
HYSVGAG--I----TDKGEVPNGYNVSRSN-TEDFPLR------LESAASSQTSVYFCGS
SD-----
>V108RF-AQIA01048531.1-trbv |(13036, 13336)|2.50453953306|(0.947,0.743,0.970)|1
-----HTGAGVSQFPRYRVTKRGQDVTLRCDPISG-------HEYLYWYQQAPGQGPEFL
TYFQND---AQP--DKSGLPNDRFSAERTE-GSVSTLK------IQRTEQGDSAVYLCAS
SL-----
>V111RF-AQIA01048532.1-trbv |(3516, 3812)|2.75773258026|(0.968,0.885,0.936)|1
-----PVDAGVTQSPTHLIKTRGQQVTLRCSPISG-------HTSVYWYQQALGQGPQFI
FQYYEKE---ER--ER-GNFPDRFSGHQFP-NYSSELN------VSALLLGDSALYLCAS
SL-----
>V112RF-AQIA01048532.1-trbv |(10804, 11101)|2.64613177862|(0.840,0.957,0.948)|1
-----PVNAGVTQTPKFQVLKTGQSMIVQCAQDMK-------HDYMFWYRQDPGMGLRLI
YYSVTAG--I----TTKGEVPNGYNVSRKN-TEDFLLR------LESADPSQTSVYICAS
SE-----
>V113RF-AQIA01048532.1-trbv |(15109, 15409)|2.76768632674|(0.905,0.931,0.939)|1
-----HTGAGVSQSPRYKVIKKGQDVALRCDPISG-------HAALYWYQQALGQGPEFL
TYFNYK---AQP--DKSGLPNDRFSAERPE-GSVSTLT------IQRTEQQDSAVYLCAS
SL-----
>V114RF-AQIA01048532.1-trbv |(34644, 34944)|2.59891847018|(0.882,0.843,0.880)|1
-----HADAGVSQDPRHKITKTGQNVSFKCVPISE-------HNRLYWYRQTLGQGPEFL
TYFQNEA---QQ--DRSGLFSDRFSAERPE-GSISTLM------IQHTEQGDSAVYLCAS
SL-----
>V116RF-AQIA01048532.1-trbv |(48704, 49001)|2.78745609036|(0.928,0.938,0.922)|1
-----HMDAGITQSPRHKITETGTPVTLRCHQTEN-------HRYMYWYRQDLGNGLRLI
HYSYGVE--D----TDKVEVSDGYSVSRSK-TEDFLLT------LESAPRSQTSVYFCAS
SE-----
>V125RF-AQIA01048536.1-trbv |(15427, 15724)|2.73747343601|(0.891,0.928,0.930)|1
-----TMDGRITQSPKYLFRKEGQNVTLSCEQNLN-------HDAMYWYRQDPGQGLRLI
YYSQIVN--D----IQKGDIAEGYSVSRER-KESFPLT------VTSAQRNPTAFYLCAS
SI-----
>V128RF-AQIA01048536.1-trbv |(54577, 54875)|2.68893938112|(0.904,0.937,0.860)|1
-----SMDADVTQTPRNKIAKTGKRIMLECSQTKG-------HDQMYWYRQDPGLGLRLI
YYSFDVQ--D----INKGEISNGYSVSRQE-QAKFSLS------LESATPNQTALYFCAT
SD-----
>V129RF-AQIA01048536.1-trbv |(62410, 62707)|2.59926930513|(0.847,0.941,0.846)|1
-----LTEADIYQNPRHRVIGTGKKITLECSQTVG-------HDKMYWYQQDPGMELHLI
HYSYGVN--S----TERGDFSSESTVSRLR-IEHFPLT------LESASPSHTSQYLCAS
SE-----
>V131RF-AQIA01048536.1-trbv |(108616, 108923)|2.64130075255|(0.880,0.867,0.896)|1
-----LVDVKVTQSSRYLIKRTGEKVFLECVQDMD-------HERMFWYRQDPGLGLRLI
YFSYDVK--L----NEKGDIPEGYSVSREK-KERFSLI------LGSASTNQTSMYLCAS
SLSTA--
>V132RF-AQIA01048536.1-trbv |(128401, 128704)|2.53724504898|(0.873,0.781,0.929)|1
----SVFSAVVSQKPSRDVCQRGTSVTIQCQVDSQ-------VTMMFWYRQQPGQSMTLI
ATANQGS--EAT--YESGFVIDKFPISRPN-LTFSTLT------VSNTSPEDSSIYLCSV
E------
>V134RF-AQIA01058133.1-igkv |(2029, 2329)|2.97830822856|(0.998,0.985,0.996)|1
----ARCDIQMTQSPSSLSASVGDTVTITCRASQGIS------NDLAWYQQKPGETPKLL
IY----E--AS---SLQSGIPSRFSGSGS--GTDFTLT------ISSLQSEDFATYYCQH
YYSTP--
>V137RF-AQIA01064137.1-trav |(37156, 37446)|2.64168718425|(0.866,0.864,0.926)|1
----MSRGEDVEQS-LFLSVREGDISVINCTYTDS-----S-STYLYWYKQEPGAGLQLL
TYILSNT--DL---KQDQRLTVLLNKK----DKHLSLC------IADTQTEDSAIYFCAE
S------
>V139RF-AQIA01064138.1-trav |(6177, 6471)|2.80483034719|(0.972,0.991,0.878)|1
----GINGDSVVQTEGQVLLSEGDSLIVNCSYEST-----QY-PSLFWYVQYPGEGLQLL
LKAMKF---NDK--ESNKGFEATYRKE----TTSFHLE------KDSVQESDSAVYFCAL
S------
>V140RF-AQIA01064138.1-trav |(19410, 19703)|2.52353655292|(0.811,0.842,0.966)|1
----GSGKNQVEQSPQSLIILEGKNCTLQCNYTVS-----P-FSNLRWYKQDTGKGPISL
TIMTFSE--NT---KSNGRYTATLDAD----TKQSSLH------ITAAQLSDSASYICVV
S------
>V141RF-AQIA01064144.1-trav |(2574, 2880)|2.38524037236|(0.907,0.733,0.866)|1
---VWSQQKEVEQDPGPFSVPEGATVTFNCTYSNS-----A-SQSFFWYRQDSRKEPKLL
MSVYSSG--N-----EDGRFTAQLNRA----SQYISLL------IRDSQLSDSATYLCAV
RTQCSP-
>V143RF-AQIA01064146.1-trav |(4210, 4500)|2.83384066792|(0.939,0.940,0.956)|1
-----VNGENVEQHPSTLSVQEGDSSVIKCTYSDS-----A-SNYFPWYKQELGKGPQFI
IDIRSNA--HE---KKNQRITVLLNKT----AKHFSLH------ITETQPGDSAVYFCAA
S------
>V144RF-AQIA01064146.1-trav |(26731, 27019)|2.75624910116|(0.893,0.920,0.969)|1
---VWS-QQKVEQNSGPLNVPEGAIASLNCTYSDS-----G-SQSFFWYRQYSGQSPELL
MSTYSSG--DK----EDGRFTAQLDRA----SQYVSLL------IRDSQLSDSATYLCAV
-------
>V146RF-AQIA01064146.1-trav |(38786, 39083)|2.36621557639|(0.914,0.851,0.736)|1
----TARAQSVTQPDIHITVSEGASLELRCNYSYG-----AT-PSLFWYVQSPGQGLQLL
LKYFSGD--TVV--QGIKGFEAEFKRS----QYSFNLR------KPSVHWSDAAEYFCAA
G------
>V147RF-AQIA01064146.1-trav |(52629, 52922)|2.48924553967|(0.935,0.930,0.751)|1
----VSRGESVGLHLPTVTVQEGDNSVINCTYSDS-----A-SDYFLWYKQESGKGPQSI
MDIRSNM--AK---RQGQRLTVLLNKT----MKHLSLQ------IAATEPGDSAVYFCAE
N------
>V148RF-AQIA01064146.1-trav |(58513, 58814)|2.52309867205|(0.929,0.805,0.865)|1
----SGIAQKITQTQPAMFVQEKEAVTLDCTYDTS-----DQNYGLFWYKQPSSGEMIFL
ILQMSYD--KQN--ATEGRYSLNFQKA----RKSVNLV------ISASQVGDSATYFCAM
R------
>V149RF-AQIA01064146.1-trav |(76833, 77127)|2.67945762027|(0.929,0.881,0.886)|1
----RTRGDSVTQMEGPVTLSERAFLTINCTYTAT-----GY-PSLFWYVQYPGEGPQLL
LKAAKT---DEK--GSNKGFEATYRKE----TTSFHLK------KDSVQESDSAVYFCAL
S------
>V150RF-AQIA01064146.1-trav |(101455, 101748)|2.72495715951|(0.910,0.883,0.938)|1
---VWSQQKEVEQNPGPLSVPEGATASLNCTYSNS-----A-FQYFMWYRQYSRKGPQLL
IYIYSSG--NK----EDGRFTAQVDKS----SKYISLF------IRDSQPSDSATYFCAM
S------
>V153RF-AQIA01064148.1-trav |(10272, 10559)|2.75225105395|(0.935,0.947,0.882)|1
-----VNSQQGEEDPQALSIQEGENATMNCSYKT------S-INNLQWYRQDSGRSLVQL
VLIRSNE--RE---KNSGRLRVTLDTS----KKSSSLL------ITASRAADTASYFCAT
D------
>V155RF-AQIA01064149.1-trav |(10740, 11043)|2.36652587719|(0.812,0.793,0.770)|1
----SSMAQKVTQAQTEISVVEKEDVTLDCVYETR-----DTTYYLFWYKQPPSGELVFL
VRQNSFD--EQN--EINGRYYSNFQKS----TSSFNLT------ITASQVVDSAVYFCAL
NE-----
>V156RF-AQIA01064151.1-trav |(18011, 18298)|2.35637660629|(0.909,0.842,0.736)|1
----LSGEDQVTQSPEALSLQEGESSSLNCSYTVS-----G-LRGLFWYRQDPGKGPEFL
FSLYSAG--EE---KEKERLKATLTKK------ESFLH------ITGPKPEDSATYLCAV
Q------
>V163RF-AQIA01064165.1-trav |(18360, 18659)|2.44933647734|(0.856,0.811,0.802)|1
-----VNGQQIMQIPQYQHVQEGEDFTTYCNSSTTL-------SNIQWYKQRPGGHPVFL
IMLVKSG--E-V--KKQKRLTFQSGEA----KKNSSLH------ITATQTTDVGTYFCAG
HSAPQ--
>V169RF-AQIA01064166.1-trdv |(135908, 136209)|2.1955186103|(0.700,0.736,0.833)|1
----SGMAQTVTQSQQEMSVQEAETVILSCTYDTS-----ESNYYLFWYKQPPSRQMILI
IRQEAYK--QQN--ATENRFSVNFQKA----AKSFSLK------ISDSQLGDAAMYFCAF
M------
>V171RF-AQIA01064166.1-trav |(168980, 169268)|2.49662047425|(0.819,0.800,0.916)|1
----LSGELKVGQNPLFLSTQEGKNYTIYCNYSTA-------SDRLYWYRQDPGKSLESL
FVLLSNG--AV---KQEGRLMASLDTK----ARLSSLH------ITAALQDLSATYFCAV
-------
>V172RF-AQIA01075814.1-ighv |(1456, 1765)|2.97420030738|(0.997,0.995,0.983)|1
----VLSQVQLQE-SGPGLVKPSETLSLTCAVSGGSI-S---GYYWNWIRQPPGKGLEWI
GYIGGS-S-GST--YYNPSLKSRVTISTDTSKNQFSLK------LSSVTAADTAVYYCAR
-------
>V174RF-AQIA01075814.1-ighv |(41318, 41631)|2.96694028297|(0.997,0.985,0.986)|1
----VQCEVQLVE-SGGGLVQPGGSLRLSCAASGFTF-G---DYGMSWVRQAPGKGLEWV
GRIRNKANSYTT--EYAASVKGRFTISRDDSKNTLYLQ------MSSLKTEDTAVYYCT-
-------
>V175RF-AQIA01075814.1-ighv |(48089, 48398)|2.9614447479|(0.990,1.000,0.973)|1
----VQCEVQLVE-SGGGLVQPGGSLRLSCAASGFTF-S---SYDMSWVRQAPGKGLEWV
SFISNT-G-KTI--YYADSVKGRFTISRDNAKNSLSLQ------MSSLRAEDTAVYYCTR
-------
>V180RF-AQIA01075823.1-ighv |(9677, 9986)|2.96189235973|(0.986,0.977,1.000)|1
----VQCEVQLVE-SGGGLAKPGGSLRLSCAASGFSF-S---DYYMYWVRQAPGKGLEWV
SGISYT--GGST--YYADSVKGRFTISRENAKNTLYLQ------MDSLRAEDTAVYYCAR
-------
>V181RF-AQIA01075825.1-ighv |(15487, 15796)|2.98675601537|(0.992,0.997,0.998)|1
----VQCEVQLVE-SGGGLVQPGGSLRLSCAASGFTF-S---SYWMYWVRQAPGKGLEWV
SRISSD--GSST--SYADSVKGRFTISRENAKNSLYLQ------MNSLRAEDTAVYYCAK
-------
>V182RF-AQIA01075825.1-ighv |(23332, 23647)|2.93841247584|(0.994,0.967,0.981)|1
----VQCEVQLVE-SGGGLVQPGGSLRLSCAASGFTF-S---SSAMHWVRQASGKGLEWV
GRIRSKSNNYET--GYAASVKGRFTISRDDSKNTAYLQ------MNSLKTEDTAVYYCTT
-------
>V183RF-AQIA01075826.1-ighv |(7442, 7757)|2.87086319439|(0.951,0.988,0.938)|1
----VQCEVQLVE-SGGGLVQPGGSLRLSCAASGFTF-S---DYYMSWVRQAPGKGPEWV
GFIRNKANGGTA--EYAASVKGRFTISRDDSKSIASLQ------MNSLKTEDTAVYYCAR
-------
>V184RF-AQIA01075827.1-ighv |(12747, 13054)|2.8847381818|(0.940,0.967,0.991)|1
----VQCEVQLAE-SGGGLVQPGGSLRLSCAASGFTF-S---SYEMHWVRQAPGKGLESV
SVIGGD--SSYT--HYADSVKGRFTISRDNAKNSLSLQ------MNSLRAEDTAVYYCA-
-------
>V186RF-AQIA01075832.1-ighv |(13782, 14094)|2.97571202074|(0.996,0.990,0.990)|1
----VLSQVQLQE-SGPGLVKPSETLSLTCAVSGGSI-S-SG-YYWSWIRQPPGKGLEWI
GYIYGS-S-GST--YYNPSLKSRVTISKDTSKNQFSLK------LSSVTAADTAVYYCAR
-------
>V187RF-AQIA01075832.1-ighv |(26831, 27140)|2.97360803841|(0.996,0.989,0.989)|1
----VQCEVQLVE-SGGGLAKPGGSLRLSCAASGFTF-S---SYWMYWVRQAPGKGLEWI
SAISSG-G-GST--YYADSVKGRFTISRDNSKNTLSLQ------MNSLRAEDTAVYYCAK
-------
>V188RF-AQIA01075832.1-ighv |(39067, 39376)|2.90790924071|(0.952,0.997,0.968)|1
----VQCDVQLVE-SGGGLVKPGGSLRLSCVASGFTF-S---SYVMHWVRQAPGKGLEWV
SVISES-G-GTI--YYADSVKGRFTISRDNAKNSLFLQ------MNSLRAEDTAVYYCTR
-------
>V191RF-AQIA01075834.1-ighv |(15808, 16117)|2.95638527945|(0.992,0.994,0.972)|1
----VLSQVQLQE-SGPGLVKPSETLSLTCAVSGGSI-S---GYYWSWIRQSPGKGLEWI
GYIYGS--GSST--NYNPSLKSRVTISKDTSKNQFSLK------LSSVTAADTAVYYCAR
-------
>V192RF-AQIA01075844.1-ighv |(4662, 4971)|2.94436078502|(0.984,0.995,0.967)|1
----VLSQVQLQE-SGPGLVKPSETLSLTCAVSGGSI-S-S--NYWSWIRQPPGKGLEWI
GNIDGN-T-ADT--NYNPSLKSRVTISKDTSKNQFSLK------LSSVTAADTAVYYCAR
-------
>V195RF-AQIA01075855.1-ighv |(3762, 4071)|2.86265837906|(0.982,0.995,0.908)|1
----VLSQVQLQE-SGPGLVKPSETLSLTCAVSGGSI-S---SNYWSWIRQPPGKGLEWI
GYIYGS-G-SST--NYNPSLKSRVTLSVDTSKNQLSLK------LSSVTAADTAVYYCAR
-------
>V196RF-AQIA01075856.1-ighv |(13880, 14195)|2.88268890225|(0.995,0.915,0.998)|1
----VLSQVQLQE-SGPGLVKPSETLSLTCAVSGGSI-S-GGYYYWSWIRQPPGKGLEWI
GNIYGN-S-AST--YYNPSLKSRVTISKDTSKNQFSLK------LSSVTAADTAVYYCAR
-------
>V198RF-AQIA01075859.1-ighv |(15555, 15867)|2.9738720041|(0.994,0.990,0.990)|1
----VLSQVQLQE-SGPGLVKPSETLSLTCAVSGGSI-S-DS-YWWSWIRQPPGKGLEWI
GYIYGS-S-TST--NYNPSLKSRVTISKDTSKNQFSLK------LSSVTAADTAVYYCAR
-------
>V199RF-AQIA01075860.1-ighv |(3491, 3803)|2.96298400013|(0.987,0.989,0.987)|1
----VLSQVQLQE-SGPGLVKPSETLSLTCAVSGGSI-S-SS-NWWSWIRQPPGKGLEWI
GNIGGS-S-GST--YYNPSLKSRVTISKDTSKNQFSLK------LSSVTAADTAVYYCAR
-------
>V200RF-AQIA01075862.1-ighv |(11827, 12136)|2.96478801933|(0.990,0.983,0.992)|1
----VQCEVQLVE-SGGGLAKPGGSLRLSCAASGFTF-S---DYYMHWVRQASGKGLEWV
SSISNG-G-GST--WYADSVKGRFTISRENAKNTLYLQ------MDGLRAEDTAVYYCAR
-------
>V206RF-AQIA01075865.1-ighv |(14324, 14639)|2.97975601537|(0.997,0.992,0.991)|1
----VQCEVQLVE-SGGALAQPGGSLRLSCAASGFTF-S---DYYMDWVHQAPGKGLEWV
GRIRNKANSYTT--EYAASVKGRFTISRDDSKNTLYLQ------MSSLKTEDTAVYYCAR
-------
>V209RF-AQIA01075868.1-ighv |(2740, 3049)|2.95721230726|(0.991,0.977,0.990)|1
----VQCEVKLVE-SGGGLVQPGGSLRLSCAASGFTF-S---NYWMFWVRQAPGKGLEWV
SSISGS--SSST--YYPDSVKGRFTISRDNAKNTLYLQ------MNSLRAEDTAVYYCAR
-------
>V212RF-AQIA01007908.1-igkv |(8863, 9163)|2.9783881665|(0.998,0.995,0.986)|-1
----ARCDIQMTQSPSSQSASVGDRVTITCQASQSLS------NYLNWYQQKPGKIPKLL
IY----R--AS---SLQSGIPSRFSGSGS--GTDFTLT------ISSLQPEDFATYYCQQ
GYSYP--
>V215RF-AQIA01017118.1-igkv |(14570, 14870)|2.96996400065|(0.991,0.988,0.991)|-1
----ARCDIQMTQSPSSLSASVGDRVTITCRASQGIN------NYLSWYQQKPGKAPKPL
IY----Y--AS---SLETGVPSRFSGSGS--GTDYTLT------ISSLQPEDIATYYCQQ
YNNSP--
>V222RF-AQIA01017118.1-igkv |(131697, 131995)|2.71803796974|(0.974,0.829,0.998)|-1
----SKGEIVLTQSPAFQSVTLKEKVTITCQASQSIG------SSLHWYQQKPDQSPKLL
IK----Y--AS---QSISGVPSRFSGSGS--GTDFTLT------INSLEAEDAATYYCQQ
SSSF---
>V224RF-AQIA01017118.1-igkv |(166412, 166712)|2.91370803341|(0.973,0.965,0.976)|-1
----VRCDIQMTQAPSFLSASVGDRVTITCQASQSIS------NDLAWYQQKPGKSPTLL
IY----D--AT---NLHTGVPSRFSGSGS--GADYSLT------ISSLELEDFAAYYCQQ
EYSYP--
>V225RF-AQIA01017120.1-igkv |(6524, 6816)|2.80824910116|(0.961,0.885,0.988)|-1
----SRGDIVMTQSPAFVSVTPGEKVTITCQASEGIS------NYLHWYQQKPDQAPKLF
IQ----Y--AS---QSISGVPSRFTGSGS--GTDFTFT------ISSLEVEDAATYYCQQ
GN-----
>V226RF-AQIA01017120.1-igkv |(22790, 23081)|2.88648631714|(0.974,0.964,0.951)|-1
-------DIQMTQSPSSLSASVGDTVTITCRASQSFS------SSLAWYQQKPGKAPKLL
IY----S--AS---SLQSGVPSRFSGSKS--GTDFTLT------ISSLQPEDIASYYCQQ
YYSYP--
>V227RF-AQIA01017120.1-igkv |(38344, 38636)|2.97456408064|(0.996,0.993,0.986)|-1
----AKCDIQMTQSPSSLSASVGDRVTITCRASQTIS------SYLAWYQQKPGKVPKLL
IY----A--AS---SLESGVPSRFSGSGS--GTEFTLT------ISSLQPEDFATYYCQQ
HN-----
>V228RF-AQIA01017120.1-igkv |(57654, 57954)|2.83117045275|(0.997,1.000,0.884)|-1
----ARCDIQMTQSPSSLSASVGDRVTITCRASQGIS------TYLNWYQQKPGKAPKLL
IY----A--AS---SLQSGVPSRFSGSGS--GTEFTLT------ISSLQPEDFATYYCLQ
YNSKP--
>V229RF-AQIA01017120.1-igkv |(72400, 72698)|2.77427075435|(0.996,0.930,0.901)|-1
----TTGEIVMTQSPATLSLSPGERATLSCRASQSVS------SSLAWYQQKPGQAPRLL
IY----G--AS---SRATGIPDRFSGSGS--GTEFTLT------ISSLEPEDFAVYYCQQ
YSNW---
>V230RF-AQIA01017120.1-igkv |(84992, 85292)|2.72744130129|(1.000,1.000,0.833)|-1
----ARCDIQMTQSPSSLSASVGDRVTITCRASQGIS------NYLNWYQQKPGKAPKLL
IY----A--AS---SLQSGVPSRFSGSGS--GTEFTLT------ISSLQPEDFATYYCQP
FKNYL--
>V232RF-AQIA01017123.1-igkv |(8475, 8775)|2.9753881665|(0.995,0.983,0.998)|-1
----ARCDIQLTQSPSSLSASVGDRVTITCRASQGIS------SYLAWYQQKPGKAPKLL
IY----K--AS---TLQSGVPSRFSGSGS--GTDFTLT------ISSLQPEDFAVYYCQQ
RNSYP--
>V233RF-AQIA01017123.1-igkv |(15101, 15401)|2.97476801985|(0.993,0.986,0.996)|-1
----AKCDIQMTQSPSSLSASVGDRVTITCRASQGIS------SYLAWYQQKPGKAPKPL
IY----Y--AS---NLESGVPSRFSGSGS--GTEFTLT------ISSLQPEDFATYYCQQ
YNSDP--
>V234RF-AQIA01017123.1-igkv |(32082, 32382)|2.84422081075|(0.998,1.000,0.891)|-1
----ARCDIQMTQSPSSLSASVGDRVTITCRASQGIS------NYLSWYQQKPGKAPKLL
IY----A--AS---SLQSGVPSRFSGSGS--GTEFTLT------ISSLQPEDFATYYCLQ
GYSTP--
>V235RF-AQIA01017123.1-igkv |(42629, 42935)|2.82786624165|(0.968,0.917,0.954)|-1
--------TVMTQSPATLSLSPGERATLSCRASQSV------SSSLAWYQQKPGQAPRLL
IY----Y--AS---SRATGIPDRFSGSGS--GTEFTLTISSTLTISSLDPEDVGVYYCQK
YNDWP--
>V236RF-AQIA01017125.1-igkv |(705, 1005)|2.97721230726|(0.997,0.983,0.998)|-1
----ARCDIQLTQSPSSLSASVGDRVTITCRASQGIS------SYLAWYQQKPGKAPKLL
IY----A--AS---NLQSGVPSRFSGSGS--GTDFTLT------ISSLQPEDFAVYYCQQ
RNSYP--
>V237RF-AQIA01017126.1-igkv |(2367, 2667)|2.95609598554|(0.998,1.000,0.963)|-1
----ARCDIQMTQSPSSLSASVGDRVTITCRASQGIS------SYLNWYQQKPGKAPKLL
IY----Y--AN---SLASGVPSRFSGSGS--GTDYTLT------ISSLQPEDFATYYCQQ
GNSNP--
>V238RF-AQIA01017126.1-igkv |(20855, 21155)|2.8264047108|(0.987,0.954,0.912)|-1
----TTGEIVMTQSPATLSLSPGETATISCRTSQSVS------SYLAWYQQKPGQAPRLL
IY----G--AS---SRATGIPDRFSGSGS--GTDFTLT------ISSLEPEDFAVYYCQE
TSNLS--
>V239RF-AQIA01017128.1-igkv |(28886, 29186)|2.95593200206|(0.987,0.986,0.983)|-1
----ARCDIQMTQSPSSLSASVGDTVTITCRASQGIS------SYLNWFQQKPGKAPKLL
IY----A--AS---SLESGVPSRFSGSGS--GTEFTLT------ISSLQPEDFATYYCLQ
YNSYP--
>V241RF-AQIA01017128.1-igkv |(51771, 52071)|2.69046344043|(0.972,0.872,0.904)|-1
----TTGEIVMTQSPATLSLSPGERATLSCRASQSVS------SRLAWYQQKPGQAPRLL
IY----G--AS---SRATGIPDRFSGSGS--GTEFTLT------ISSLEPEDVGVYYCQQ
DYSWP--
>V242RF-AQIA01017128.1-igkv |(94686, 94986)|2.99899600001|(1.000,1.000,0.999)|-1
----ARCDIQMTQSPSSLSASVGDRVTITCRASQGIS------SYLAWYQQKPGKAPKLL
IY----D--AS---NLQSGVPSRFSGSGS--GTDFTLT------ISSLQPEDFATYYCQQ
HNSYP--
>V243RF-AQIA01017128.1-igkv |(113498, 113796)|2.72888365928|(0.985,0.930,0.874)|-1
----TTGEIVMTQSPATLSLSPGERATLSCRASQSVS------SSLAWYQQKPGQAPRLL
IY----G--AS---SRATGIPDRFSGSGS--GTDFTLT------ISSLEPEDVAVYYCLQ
RSNW---
>V244RF-AQIA01017130.1-igkv |(1559, 1859)|2.8892535796|(0.981,0.945,0.969)|-1
----ARCDIQMTQSPSSLSASVGDKVTITCHASQGIS------SWLAWYQQKPGKAPKPL
IY----K--AS---SLQSGVPSRFSGSGS--GTDYTLT------ISSLQPEDFATYYCQQ
YDNLP--
>V245RF-AQIA01017133.1-igkv |(667, 967)|2.92505544896|(0.988,0.945,1.000)|-1
----ARCDIQMTQSPSSLSASVGDKVTITCHASQGIS------SWLAWYQQKPGKAPKPL
IY----K--AS---SLQSGVPSRFSGSGS--GTDFTLT------ISSLQPEDFATYYCQQ
YSSYP--
>V246RF-AQIA01017135.1-igkv |(10903, 11203)|2.95410021834|(0.986,0.974,0.995)|-1
----AKCDIQMTQSPSSLSASVGDKVTITCQASQSIS------SWLAWYQQKPGKAPKPL
IY----K--AS---SLESGVPSRFSGSGS--GTDFTLT------ISSLQPEDFATYYCQQ
HNSYP--
>V248RF-AQIA01017139.1-igkv |(38517, 38829)|2.70960420047|(0.885,0.942,0.896)|-1
----CNGDIVLTQSPASLAVSPGQRATITCRASESVSF--FGINLIHWYQQKPGQPPKLL
IY----Q--AS---NKDTGVPARFSGSGS--GTDFTLT------INPVEADDAADYYCLQ
SKNSP--
>V251RF-AQIA01066360.1-ighv |(8136, 8449)|2.86173453214|(0.973,0.988,0.915)|-1
----VQCEVQLVE-SGGGLVQPGGSLRLSCAASGFTF-S---NYYMHWVRQAQGKGLEWV
GLIRNKANSYTT--EYAAAVKGRFTISRDDSKNTLYLQ------MSSLKTEDTALYYCT-
-------
>V256RF-AQIA01066362.1-ighv |(12791, 13106)|2.97553206285|(0.993,0.999,0.984)|-1
----VQCEVQLVE-SGGGLVQPGGSLRLSCAASGFTF-S---NYWMSWVRQAPGKGLEWV
GFIKNKADGGTA--AYAESVKGRFTISRDDSKNTLYLQ------MNSLKTEDTAVYYCTR
-------
>V257RF-AQIA01066366.1-ighv |(294, 607)|2.98879201242|(0.993,0.999,0.997)|-1
----VQCEVQLVE-SGGGLVQPGGSLRLSCAASGFTF-S---NYWMSWVRQAPGKGLEWV
GFIKNKADGGTA--DYAASVKGRFTISRDDSKNTLYLQ------MSSLKTEDTAVYYCT-
-------
>V262RF-AQIA01066385.1-ighv |(14117, 14432)|2.96950008499|(0.995,0.990,0.985)|-1
----VQCEVQLVE-SGGGLVQPGGSLRLSCAASGFTF-S---DYAMDWVRQAPGKGLEWV
GFIRSKAYGGTA--EYAASVKGRFTISRDDSKNTAYLQ------MSSLKTEDTAVYYCTR
-------
>V263RF-AQIA01066387.1-ighv |(6564, 6873)|2.97272803289|(0.993,0.995,0.985)|-1
----VQCEVQLVE-SGGGLVQPGGSLRLSCAASGFTF-G---DYGMHWVRQAPGKGLEWV
SSISNT-G-KTI--YYADSVKGRFTVSRDNAKNSLSLQ------MSSLRAEDTAVYYCTR
-------
>V264RF-AQIA01066387.1-ighv |(11668, 11974)|2.98598400013|(0.996,0.996,0.994)|-1
----VQCEVQLVE-SGGGLVQPGGSLRLSCAASGFTF-S---SYGMSWVRQAPGKGLEWV
SAISSG---GST--YYADSVKGRFTISRDNSKNTLSLQ------MNSLRAEDTAVYYCAK
-------
>V266RF-AQIA01066387.1-ighv |(66519, 66828)|2.97988400513|(0.991,0.993,0.996)|-1
----VQCEVQLVE-SGGGLAKPGGSLRLSCAASGFTF-S---DYYMDWVRQAPGKGLEWV
SRISNG--GGST--WYADSVKGRFTISRENAKNTLYLQ------MNSLRAEDTAVYYCAR
-------
>V268RF-AQIA01066387.1-ighv |(87163, 87466)|2.84535178036|(0.959,0.981,0.915)|-1
----VQCEVQLAE-SGGGLVQPGGSLRLSCAASGFTI-S---SYWMSWVCQAPGKGLEWL
SDIYG----STM--YYGDSVKGLFTVSRDNAKNSLYLQ------MNSLRAEDTAVYYCTR
-------
>V270RF-AQIA01066387.1-ighv |(108611, 108920)|2.89769465218|(0.975,0.951,0.974)|-1
----VLSQLQLQE-SGPGLVKPSETLSLTCAVSGGSI-S---SNYWSWIRQPPGKGLEWI
GRISGS-G-GST--DYNPSLKSRVTISTDTSKNQFSLK------LSSVTAADTAVYYCAR
-------
>V272RF-AQIA01066395.1-ighv |(16120, 16435)|2.96021230726|(0.992,0.991,0.978)|-1
----VQCEVQLVE-SGGGLVQPGGSLRLSCAASGFTF-S---DHYMFWVRQAPGKGLEWV
GFIRSKAYGGTA--EYAASVKGRFTISRDDSKSIAYLQ------MSSLKTEDTAVYYCTR
-------
>V274RF-AQIA01066397.1-ighv |(62192, 62507)|2.96719216959|(0.996,0.987,0.985)|-1
----VQCEVQLVE-SGGGLVQPGGSLRLSCAASGFTF-S---NHYMYWVRQAPGKGLEWV
GFIRSKAYGGTA--EYAASVKGRFTISRDDSKNTAYLQ------MSSLKTEDTAVYYCTR
-------
>V276RF-AQIA01073275.1-ighv |(9357, 9667)|2.97651611711|(0.996,0.996,0.985)|-1
----VQCEVQLVE-SGGGLVQPGGSLRLSCVASGFTF-S---DHYMDWVRQAPGKGLEWV
SSISTG-SGSTT--LYPDSVKGRFTISRDNAKNTVYLQ------MNSLRAEDTAVYYCA-
-------
>V277RF-AQIA01075132.1-igkv |(288, 575)|2.77335180947|(0.971,0.868,0.976)|-1
--------TVMTQSPATLSLSPGERATLSCRASQSVG------SNLAWYQQKPGQAPRLL
IY----D--AS---SRATGIPDRFSGSGS--GTEFTLT------ISSLEPEDVGVYYCQQ
YNNWN--
>V5RF-ADFV01062069.1-trbv |(42333, 42630)|2.52836699101|(0.918,0.912,0.776)|1
-----SLDTAVSQTPKYLVTQMGNDKSLKCEQNLG-------HDTMYWYKQDSKKFLKIM
FSYRNK---EPI--LNETV-PNRFSPDSPD-KAHLNLH------IKSLELGDSAVYFCAS
SQ-----
>V8RF-ADFV01062069.1-trbv |(61551, 61858)|2.9130882474|(0.981,0.981,0.954)|1
-----PVNAGVTQTPKFQVLKTGQSMTLQCAQDMN-------HNSMYWYRQDPGMGLRLI
HYSVGEG--T----TDKGEVPDGYNVSRLN-TQDFSLR------LESAAPSQTSVYFCAS
SEATV--
>V10RF-ADFV01062071.1-trbv |(8280, 8577)|2.90140235426|(0.964,0.987,0.953)|1
-----PVNAGVTQTPKFQVLKTGQSMTLQCAQDMN-------HNSMYWYRQDPGMGLRLI
HYSAVEG--I----TDKGEVSDGYNVSRLN-KQNLLLR------LVSAAPSQTSVYFCAS
SE-----
>V11RF-ADFV01062071.1-trbv |(16301, 16614)|2.49148389128|(0.926,0.784,0.871)|1
-----PLDTAVLQTPKYLVTQTGKKESLKCEQNLG-------HNAMYWYKQDSKKFLKIM
FSYSNK---EPI--LNETV-PNRFSPESPD-KSHLNLH------ISSLELGDSAVYFCAS
SQDTALQ
>V13RF-ADFV01062071.1-trbv |(27836, 28133)|2.84302658657|(0.987,0.981,0.903)|1
-----PVNAGVTQTPKFQVLKTGQSMTLQCAQDMN-------HNYMYWYRQDPGMGLRLI
HYSTGEG--T----TDKGEVSDGYDVSRSN-TQNFLLR------LESAAPSQTSVYFCAS
SE-----
>V17RF-ADFV01062075.1-trbv |(33395, 33695)|2.84491495942|(0.946,0.970,0.932)|1
-----HTGAGVSQSPRYKVTKKGQDVALRCDPISG-------HVSLYWYRQTLRQGPEFL
TYFNYE---AQQ--DKSGLLSGRFSAERPE-GSVSTLK------IQRTEQGDTAVYLCAS
SL-----
>V18RF-ADFV01062075.1-trbv |(40699, 40989)|2.70903540658|(0.934,0.876,0.914)|1
-------ETGVTQSPTHLIKTRGQQVTLRCSPMSG-------HTSVYWYQQVLGQGLQFL
LWYNEEA---ER--ER-GNFPRRFSGRQFP-NYSSELN------VNASLLEDSALYLCAS
SL-----
>V19RF-ADFV01062075.1-trbv |(60057, 60353)|2.69866921701|(0.918,0.847,0.961)|1
-----SVETGVTQSPTHLIKTRGQQVTLRCSPQSG-------HNTVSWYQQTLGQGPQFI
VQYYREE---EN--GR-GNFPPRFSGRQFP-DYSSELN------VNASLLEDSALYLCAS
SL-----
>V20RF-ADFV01062075.1-trbv |(69334, 69634)|2.45093757027|(0.808,0.894,0.781)|1
-----HADTGVSQDPRHKITKRGRNVTFRCDPISE-------HNSLYWYQRTLGQGPEFL
TDFQNEA---QL--DKSGLLSDHFSAERPK-GSFSTLK------IQRTEQGDSAMYLCAS
SL-----
>V22RF-ADFV01062075.1-trbv |(83965, 84262)|2.43428963091|(0.888,0.951,0.719)|1
-----HMDAGITQSPRHKVTETGTPVTLRCHQTEN-------HCYMYWYRQDLGHGLRLI
HYSYGVK--D----TDKGEVSDGYSVSRSN-TEDFLLT------LGSATHSQTSVYFCAI
SE-----
>V23RF-ADFV01062075.1-trbv |(95774, 96074)|2.48382797528|(0.938,0.774,0.885)|1
-----LIEAGVVQSPRYKIIEKKQPVAFWCNPISG-------HNTLYWYRQNLGQGPELL
IRYENE---EAV--DDSQLPKDRFSAERLK-GVDSTLK------IQPAELGDSAVYLCAS
SL-----
>V25RF-ADFV01062076.1-trbv |(7831, 8127)|2.72852338722|(0.971,0.888,0.911)|1
-----PVDAGVTQSPTHLIKMRGQQVTLRCSPISG-------HTSVYWYQQALGQGPQFI
IQYYEEE---ER--GR-GNFPDRFSARQFP-NYSSELN------VNALLLGDSALYLCAS
SL-----
>V28RF-ADFV01062079.1-trbv |(8562, 8862)|2.55227037078|(0.860,0.809,0.900)|1
-----SPGEEVTQTPKHLVKGEGQKAKLYCAPIKG-------HSYVFWYQQVLKKEFKFL
ISFQNEN--IF---DETGMPKERFSAKCLL-NSPRSLE------IQATKLKDSAVYFCAS
SQ-----
>V31RF-ADFV01062082.1-trbv |(9024, 9321)|2.72464947362|(0.921,0.888,0.920)|1
-----LMEADIYQTPRYLVIRTGKKITLECSQTMG-------HDKMYWYQQDPGMELHLI
HYSYGVN--S----TEKGDLSSESTVSRIR-TEHFPLT------LESARPSHTSQYLCAS
SE-----
>V32RF-ADFV01062084.1-trbv |(20830, 21127)|2.47691495942|(0.830,0.844,0.806)|1
-----LLEAQVTQNPRYLITVTGKKLTVTCSQNMN-------HEYMSWYRQDPGLGLRQI
YYSINVE--A----VDKGDVPEGYNVSRKE-KRNFPLI------LESPSPNQTSLYFCAS
SL-----
>V33RF-ADFV01062084.1-trbv |(25535, 25832)|2.63276056724|(0.885,0.829,0.946)|1
-----LVDVKVTQSSRYLVKRMGEKVFLECVQDMD-------HERMFWYRQDPGLGLRLI
YFSYDVQ--M----KEKGDIPEGYSVSREK-KEHFSLI------LESASTNQTSMYLCAS
SL-----
>V36RF-ADFV01106193.1-igkv |(26068, 26361)|2.78105188446|(0.972,0.869,0.982)|1
----TTREIVLTQSPATLSLSPGEKATLSCRASQSV------GSNLAWYQQKPGQAPRLL
IY----G--AT---NRATGIPDRFSGSGS--GTDFTLT------ISSLEPEDFAVYYCQK
YGS----
>V39RF-ADFV01106193.1-igkv |(68380, 68680)|2.9898400105|(0.998,1.000,0.992)|1
----SRCDIQMTQSPSSLSASVGDRVTITCRASQGIS------NYLNWYQQKPGKAPKLL
IY----D--AS---SLQSGVPSRFSGSGS--GTEFTLT------ISSLQPEDFAAYYCQQ
YKSYP--
>V40RF-ADFV01106193.1-igkv |(80547, 80847)|2.91512906625|(0.995,0.959,0.969)|1
----TTGEIVLTQSPATLSLSTRERATISCTASQSV------SSYLAWYQQKPGQAPRLL
IY----Y--AS---SRATGIPDRFSGSGS--GTDFTLT------ISSLEPEDFAVYYCQQ
YKSFS--
>V41RF-ADFV01106195.1-igkv |(6885, 7185)|2.97853608204|(0.995,0.999,0.985)|1
----SRCDIQMTQSPSSLSASVGDRVTITCRASQGIS------SYLAWYQQKPGKAPELL
IY----A--AS---TLQSGVPSRFSGSGS--GTEFTLT------ISSLQPEDFATYYCQQ
YNSYP--
>V42RF-ADFV01106195.1-igkv |(45397, 45697)|2.95663465422|(0.993,0.969,0.997)|1
----ARCDIQMTQSPSSLSASVGDRVTITCRASQGIS------KWLAWYQQKPGKAPKPL
IY----D--AS---SLQSGVPSRFSGSGS--GTEFTLT------ISSLQPEDFATYYCQQ
YNSYP--
>V43RF-ADFV01106195.1-igkv |(64645, 64945)|2.95459865717|(0.992,0.968,0.997)|1
----ARCDIQMTQSPTSLSASVGDRVTITCRASQGIS------SWLAWYQQKPGKAPKLL
IY----K--AS---SLESGVPSRFSGSGS--GTEFTLT------ISSLQPEDFATYYCQQ
YNSDP--
>V45RF-ADFV01126738.1-iglv |(7858, 8168)|2.75222261145|(0.961,0.870,0.954)|1
----SLSQSVVTQ-PASLSASPGASARLTCTLRSG---INVGSYRISWYQQKPGSPPQYL
LNYYSDS--DK---GQGSGVPSRFSGSKDASTNAGISL------ISGLQSEDEADYYCMI
-------
>V46RF-ADFV01126738.1-iglv |(12674, 12983)|2.88055402908|(0.983,0.954,0.951)|1
----SWAQSVLTQ-PSSVSGTPGQRVTISCSGSSS---NIG-SNNVYWYQQLPGTAPKLL
IY----D--NN---QRPSGVPDRFSGSKS--GTSASLA------ISGLQTEDEADYYCEA
WDDSLSG
>V50RF-ADFV01126742.1-iglv |(25243, 25552)|2.85623134214|(0.971,0.954,0.937)|1
----SWAQSVLTQ-PPSVSGTPGQRVTISCSGSSS---NIG-SNNVYWYQQLPGTAPKLL
IY----Y--NN---QRPSGVPDRFSGSKS--GTLASLA------ITGLRSEDEADYYCEA
WDDSLSG
>V52RF-ADFV01126756.1-iglv |(8462, 8772)|2.89647195752|(0.991,0.949,0.966)|1
----SWAQSALTQ-PRSVSGSPGQSVTISCTGTSS---DVGGYNYVSWYQQHPGTAPKLM
IY----D--VS---KRPSGVSDRFSGSKS--GNTASLT------ISGLQAEDEADYYCCS
YASDDT-
>V54RF-ADFV01126759.1-iglv |(7253, 7556)|2.84650257524|(0.977,0.930,0.951)|1
----SATSYELTQ-PPSVSVAPGQTAKITCGG------NNIGSKNVYWYQQKPGQAPVLV
IY----R--DS---NRPSGIPERFSGSNS--GNTATLT------ISAVEAGDEADYYCQV
WDSTSDH
>V56RF-ADFV01126760.1-iglv |(18689, 18992)|2.86820023281|(0.956,0.929,0.991)|1
----SVASYELTQ-PPSVSVSPGQTAKITCSG------DALPKKYAYWYQQKSGQTPVLI
IY----E--DS---KRPSGIPERFSGSSS--GTMATLT------ISGTQVEDEADYYCYS
ADSSGNH
>V60RF-ADFV01136793.1-ighv |(10260, 10566)|2.99199600001|(0.997,0.997,0.998)|1
----VQCEVQLVE-SGGGLVQPGGSLRLSCVASGFTF-S---SYDMSWVRQAPGKGLEWV
SYISSG---GST--YYPDSVKGRFTISRDNAKNTLYLQ------MNSLRAEDTAVYYCAK
-------
>V61RF-ADFV01138112.1-igkv |(5360, 5660)|2.9546404731|(0.994,0.982,0.980)|1
----ARCDIQMTQSPSSLSASVGDKVTITCRASQGIS------NDLNWYQQKPGKAPKLL
IY----Y--AS---SLQSGIPSRFSGSGS--GTTYTLT------ISSLQPEDFATYYCQQ
GYSTP--
>V63RF-ADFV01192035.1-trav |(8555, 8856)|2.35214135581|(0.896,0.689,0.929)|1
----GLRAQLVAQPEDQVTVAEGNPLTVKCTYSVS-----GN-PYLFWYVQYPNQGLQFL
LKYIAGD--NLV--KGSYGFEAEFNKS----QTSFYLK------KPSALVSDSALYFCAV
RD-----
>V64RF-ADFV01192035.1-trav |(53089, 53379)|2.65481331311|(0.883,0.852,0.934)|1
----MNRGEDVEQS-LFLGVREGDSSVINCTYTDS-----S-STYLYWYKQEPGAGLQLL
TYIFSNM--DL---KQDQRLTVLLNKK----DKHLSLR------IADTQTGDSAIYFCAE
S------
>V65RF-ADFV01192035.1-trav |(63802, 64090)|2.56078163705|(0.837,0.823,0.965)|1
-----VKSQKIEQNSEALNIQEGKTATLTCNYTNY-----S-PAYLLWYRQDPGRGPVFL
LLIRENE--KE---KRKERLKVTFDTT----LKQSLFH------ITASQPADSATYLCAL
-------
>V66RF-ADFV01192035.1-trav |(73447, 73734)|2.53490743252|(0.858,0.791,0.918)|1
----ANGEKQVEHSPHFLGSQQGDVASVSCMYSVS-----R-FNNLQWYRQNTGMGPKHL
LSMYSAG--YE---KQKGRLNATLLKN------GSSLY------ITAVQPEDSATYFCAV
D------
>V67RF-ADFV01192035.1-trav |(102005, 102299)|2.83328948337|(0.967,0.991,0.897)|1
----GINGDSVVQTEGQVLLSEGDSLIVNCSYETT-----QY-PSLFWYVQYPGEGPQLL
LKAMKA---NDK--GRNKGFEATYHKE----TTSFHLE------KDSVQEADSAVYFCAL
S------
>V68RF-ADFV01192037.1-trav |(3179, 3470)|2.38278929256|(0.802,0.733,0.940)|1
----GSCKNQVEQSPQSLIILEGKNCTLQCNYTVS-----P-FNNLRWYKQDTGKGPVSL
TIMTLSE--NT---KSNGRYTATLDAD----TKQSSLH------ITASQLSDSASYICVV
-------
>V69RF-ADFV01192037.1-trav |(20251, 20539)|2.56662373226|(0.898,0.775,0.977)|1
---VWSQRKEVEQDPGPFNVPEGATVAFNCTYSNS-----V-SQSFFWYRQDCRKEPKLL
MSVYSSG--N-----EDGRFTAQLNRA----SQYIYLL------IRDSQLSDSATYLCAV
-------
>V70RF-ADFV01192037.1-trav |(26000, 26297)|2.62687958378|(0.945,0.903,0.834)|1
----GTRAQSVTQLDSHVSVSEGTPVLLRCNYSSS-----YS-PSLFWYVQYPNQGLQLL
LKYTSGT--TLV--KGINGFEAEFKKS----ETSFHLT------KSSAHVSDAAEYFCAV
S------
>V73RF-ADFV01192038.1-trav |(22028, 22319)|2.59766088802|(0.935,0.784,0.971)|1
---VWSQQKEVEQNSGPLSDPEGAIASLNCTYSDR-----S-SQSFFWYRQYSGKSPELI
TSIYSNG--DK----EDGRFTAQLNKA----SQYVSLL------IRDSQLSDSATYLCAV
-------
>V74RF-ADFV01192038.1-trav |(28540, 28837)|2.48602293162|(0.936,0.859,0.793)|1
----GTRAQSVTQLDSHVSVSEGTLVLLRCNYSSS-----VS-PNLFWYVQYPNQGLQLL
LKYISGT--TLV--KGINGFEAEFKKS----ETSFHLT------KPSAHVSDAAEYFCAV
S------
>V75RF-ADFV01192038.1-trav |(50418, 50711)|2.59029036945|(0.947,0.826,0.888)|1
----VSRGESVGLHLPTLSVQEGNNSVINCAYSDS-----A-SDYFTWYKQESGKGPQFI
IDIRSNM--DK---RQGQRVTVLLNKT----VKHLSLQ------IAATQPGDSAVYFCAE
N------
>V76RF-ADFV01192039.1-trav |(5009, 5312)|2.62285150156|(0.909,0.811,0.946)|1
----PGIAQKIIQTQPAMFVQEKEAVTLDCTYDTS-----DQSYGLFWYKQPSSGEMIFL
ISQASYD--KQN--ATEGRYSLNFQKA----RKSANLV------ISASQLGDSAKYFCAM
RE-----
>V77RF-ADFV01192039.1-trav |(24309, 24603)|2.76193938112|(0.921,0.888,0.965)|1
----RTHGDSVTQMEGPVTLSEEAFLTINCTYTAT-----GY-PTLFWYVQYPGEGPQLL
LKATRA---DDK--GSNKGFEATYRKE----TTSFHLE------KDSVQESDSAVYFCAL
S------
>V78RF-ADFV01192039.1-trav |(50026, 50319)|2.58214489407|(0.830,0.873,0.915)|1
---VWCQQKEVEQNPGPLSVPEGAIASLNCTYSNS-----A-FQYFMWYRQYSRKGPELL
MYTYSSG--NK----EDGRFTAQVDKS----SKCISLF------IRNSQPSDSATYLCAM
S------
>V80RF-ADFV01192039.1-trav |(82783, 83070)|2.64322519241|(0.881,0.848,0.927)|1
-----VNSQQGEEDPQALTIQEGENATMNCSYKS------S-TNSLQWYRQESGRGLVHL
ILIRSNE--RE---KHSGRLRVTLDTS----KKSSSLL------ITASRAADTASYFCAM
E------
>V81RF-ADFV01192039.1-trav |(88347, 88638)|2.69323355494|(0.891,0.912,0.892)|1
----RTNGDSVTQTEGPVTLPEQAALTLNCTYQSS-----YS-TFLFWYVQYLNKAPELL
LKSS-E---NQE--TDSRGFQASHVKS----DSSFHLE------KPSVQLSDSAVYYCAL
R------
>V90RF-ADFV01192042.1-trav |(56528, 56818)|2.54927037078|(0.825,0.865,0.876)|1
-----TIIDAKTTQPTSMDCAEGRAANLPCNHSTI-----SGNEYVYWYRQIHSQGPQYI
IHGLKNN--A-----TNEMASLIITED----RKSSTLI------LPHATLRDTAVYYCIV
RV-----
>V98RF-ADFV01192049.1-trav |(617, 918)|2.45223358214|(0.860,0.874,0.759)|1
----SGMAQTVTQSQPEMSVQEAETVTLSCTYDTT-----ESDYYLFWYKLPPSRQMILI
IRQEAYK--QQN--ATENHFSVNFQKA----AKSFSLK------ISDSQLGDTAMYFCAF
M------
>V99RF-ADFV01192049.1-trav |(9724, 10024)|2.65379518103|(0.945,0.907,0.846)|1
----FSMAQTVTQSQPEMSVQEAETVTLSCTYDTT-----ESDYYLFWYKQPPSRQMILI
IRQEAYK--QQN--ATENRFSVNFQKA----AKSFSLK------ISDSQLGDTAMYFCAY
R------
>V100RF-ADFV01192050.1-trav |(14951, 15239)|2.37491687132|(0.781,0.755,0.952)|1
----LSGELKVGQNPPFLSTQEGKNYTIYCNYSTI-------SDRLYWYRQDPGKSLESL
FVLLSSG--AV---KQEGRLMASLDTK----ARLSTLH------ITAAVHDLSATYFCAV
-------
>V102RF-ADFV01046571.1-trgv |(4061, 4374)|2.57932803728|(0.923,0.891,0.815)|-1
----SQKSSNLEGRTKSVTRPTGSSAEITCDLTVT-----D-TFYIHWYLHQEGKAPQRL
LYYDVSD--SRD-VLESGLSQVKYYTHTPR-RWSWILI------LRNLIENDSGVYYCAS
WG-----
>V108RF-ADFV01106214.1-igkv |(102002, 102302)|2.96804987297|(0.998,0.996,0.976)|-1
----ARCDIQMTQSPSSLSASVGDSVTITCRASQGIS------NWLAWYQQKPGKAPKLL
IY----K--AS---SLQSGIPSRFSGSGS--GTTYTLT------ISSLQPEDFATYYCQQ
SYSTP--
>V109RF-ADFV01131933.1-ighv |(14064, 14373)|2.91537797317|(0.990,0.941,0.994)|-1
----AHSQVQLVQ-SGAEVKKPGASVKVSCKASGYTF-T---SYNMYWVRQAPGQGLEWM
GVINPS-S-GGT--SYAQKFQGRVTMTRDTSISTAYME------LSSLRSEDTATYYCAR
-------
>V112RF-ADFV01131940.1-ighv |(4183, 4492)|2.98360007999|(0.998,0.998,0.988)|-1
----VQCDVQLVE-SGGGLAQPGGSLRLSCAASGFTF-S---NYYMSWVRQAPGKGLEWV
SYISGD-S-SYI--YYADSVKGRFTISRDNAKNSLYLQ------MNSLRAEDTAVYYCTR
-------
>V115RF-ADFV01131944.1-ighv |(5787, 6101)|2.97291252616|(0.998,0.982,0.994)|-1
----VQCAVQLVE-SGGGLVQPGGSLRLSCAASGFTF-S---DYYMSWVRQAPGKGLEWV
AVIRNKANGGTT--EYAASVKGRFTISRDDSKSIAYLQ------MNSLKTEDTAVYYCAE
-------
>V116RF-ADFV01131946.1-ighv |(2041, 2350)|2.90834245428|(0.985,0.996,0.937)|-1
----AHSEVQLVQ-SGAEVKKPGATVKISCKVSGYTF-T---SYYMHWVQQAPGKGLEWM
GGVDPE-G-GET--IYAEKFQGRVTITADTSTDTAYME------LSSLRSEDTAVYYCAR
-------
>V118RF-ADFV01131950.1-ighv |(11086, 11386)|2.99285201038|(1.000,0.994,0.999)|-1
-----QCEVQLVE-SGGSLVQPGGSLRLSCAASGFTF-S---DYYMHWVRQAPGKGLEWV
SEITN----SST--YYADSVKGRFTISRDNAKNTLYLQ------MNSLRAEDTAVYYCAK
-------
>V119RF-ADFV01131950.1-ighv |(21617, 21923)|2.98361205453|(0.999,0.995,0.990)|-1
----VLSQVQLQE-SGPGLVKPSETLSLTCAVSGGSI-S---GYYWSWIRQPPGKGLEWI
GYIYSS---GST--NYNPSLKSRVTMSVDTSKNQFSLK------LSSVTAEDTAVYYCAR
-------
>V120RF-ADFV01131951.1-ighv |(9601, 9910)|2.99498400013|(0.999,0.997,0.999)|-1
----VQCEVQLVE-SGGGLVQPGGSLRLSCAASGFTF-S---SYDMNWVRQAPGKGLEWV
SYISSG--GGTI--YYADSVKGRFTISRDNAKNSLYLQ------MNSLRAEDTAVYYCAK
-------
>V122RF-ADFV01131954.1-ighv |(4903, 5218)|2.96526014987|(0.995,0.984,0.987)|-1
----VQCEVQLVE-SGGGLVQPGGSLRLSCAASGFTF-S---DYAMSWVRQAPGKGLEWV
GFIRSKAYGGTT--EYAASVKGRFTISRDDSKSVAYLQ------MNSLKTEDTAVYYCTR
-------
>V123RF-ADFV01131956.1-ighv |(7476, 7785)|2.98340816598|(0.998,0.986,1.000)|-1
----VQCEVQLVE-SGGGLVQPGASLKLSCAASGFTF-S---SYGMHWVRQAPGKGLEWV
SSISTS-S-SYI--YYADSVKGRFTISRDNSKNTLYLQ------MNSLRAEDTAVYYCAR
-------
>V126RF-ADFV01131958.1-ighv |(4025, 4334)|2.88493377978|(0.995,0.937,0.969)|-1
----AHSQVQLVQ-SGPEVKKPGASVKVSCKASGYTF-T---SSAMQWVRQAPGQGLEWM
GWIIVG-N-GNT--NYAQKFQGRVTITRDTSTSTAYME------LSSLRSEDTAVYYCAT
-------
>V128RF-ADFV01131961.1-ighv |(38, 353)|2.96011631225|(0.990,0.995,0.976)|-1
----VQCEVQLVE-SGGGLVQPGGSLRLSCAASGFTF-S---NYWMHSVRQAPGKGLEWV
GRIKNKADGGTA--EYAASVKGRFTISRDDSKNTLYLQ------MNSLKTEDTAVYYCTR
-------
>V131RF-ADFV01131961.1-ighv |(37937, 38246)|2.98145211916|(0.999,0.995,0.988)|-1
----VQCEVQLVE-SGGGLVQPGGSLRLSCAASGFTF-S---SYGMNWVRQAPGKGLEWV
SYISSG-G-GTI--YYADSVKGRFTISRDNAKNSLYLQ------MNSLRAEDTAVYYCTR
-------
>V140RF-ADFV01132918.1-iglv |(49559, 49868)|2.59310449268|(0.828,0.886,0.954)|-1
----SWAQSVLTQ-PPSVSGTPGQRVTISCSGSSS---NIG-SNNVHWDQQLPGTAPKLL
IY----Y--ND---QRPSGVPDRFSGSKS--GTSASLA------ITGLRSEDEADYYCEA
WDDSLSG
>V141RF-ADFV01132961.1-igkv |(18470, 18770)|2.91096483513|(0.987,0.945,0.986)|-1
----ARCDIQMTQSPSSLSVSVGDRVTITCRASQGIS------NELAWYQQKPGQAPMLL
IY----A--AS---SLQTGVPSRFSGSGS--GTDYTLT------ISSLQPEDVATYYCLQ
DYTTP--
>V144RF-ADFV01132961.1-igkv |(93218, 93536)|2.70626597494|(0.933,0.846,0.960)|-1
----STGDIVMTQTPLFLSITLGEPASISCRSSQSLFYSDDQNIYLDWYLQKPGQSPQLL
IY----F--VS---YRASGVPDRFSGSGS--GTDFILK------ISRLEAEDVGVYYCMQ
RIEFP--
>V145RF-ADFV01132961.1-igkv |(104510, 104810)|2.94655466254|(0.993,0.987,0.969)|-1
----ARCDMQMTQSPSSLSASVGDTVTITCRASQSIS------SYLNWYQQKPGKIPKLL
IY----A--AS---TLQSGVPSRFSGSGS--GTDFTVT------ISSVQPEDFATYYCQH
GYGTP--
>V147RF-ADFV01132961.1-igkv |(146778, 147093)|2.91908850952|(0.992,0.957,0.976)|-1
----SSGDIVMTQTPLSLSITPGEPASISCRSSQSLRY-SDGNTYLYWYLQKPGQSPQLL
IY----R--VS---NRFSGVPDRFSGSGS--GTDFTLK------ISRVEAEDVGVYYCMQ
DLQAP--
>V148RF-ADFV01132961.1-igkv |(157570, 157870)|2.90427538434|(0.951,0.979,0.981)|-1
----ARCAIQMTQSPSSLSASVGDRVTITCRTSQGIS------NWIAWYQQKPGKAPKHL
IY----G--AS---NLQTGVPSRFSESGS--GTDYTLT------VSSLQPEDSTTYYCQQ
YDIFP--
>V150RF-ADFV01132961.1-igkv |(188116, 188416)|2.90257012931|(0.990,0.994,0.932)|-1
----IRCAIQMTQSPSSLSASVGDRVTITCRASQGIS------NYLNWYQQKPGKAPKLL
IY----R--AS---SLETGVPSRFSGSGS--GTDFALT------ISSLQPEDIATYYCLQ
YDNLP--
>V154RF-ADFV01132961.1-igkv |(246969, 247267)|2.79823918747|(0.962,0.944,0.906)|-1
----TRCDIQMTQSPSSLSASVGDRVTITCRASQSIS------KWLAWYQQKPGKVPKLL
IY----A--AS---TLQSGVPSRLSGSGS--GTDFTLT------ISSLQPEDVATYYCQK
HDSA---
>V157RF-ADFV01143437.1-ighv |(651, 966)|2.92304630182|(0.993,1.000,0.941)|-1
----VQCEVQLVE-SGGSLVQPGGSLRLSCAASGFTF-S---DYYMHWVRQAPGKGLEWV
GRIKNKAGGGTA--EYAASVKGRFTISRDDSKNTLYLQ------MNSLKTEDTAVYYCTR
-------
>V1RF-JYKQ01003191.1-trgv |(1259, 1575)|2.37087453346|(0.904,0.859,0.730)|1
----SQKSSNLEGRTKSVTRPTGSSAEITCDLPEV-----S-SFYIHWYLHQEGKAPQRL
LYYDSSN--SRV-VLESGISSGKYDSYGSTRRRNLRLR------LQNLIENDSGVYYCAN
WD-----
>V2RF-JYKQ01003191.1-trgv |(5603, 5916)|2.36723203636|(0.915,0.715,0.888)|1
----GQKSSNLEGITKSVTRPTGSSAEITCDFSGD-----S-NFYIHWYLHQEGKVPQRL
LYYDVSN--SRD-VLESGLSPGKYYTHTRT-RWSWILI------LRNLIENDSGVYYCAN
WD-----
>V7RF-JYKQ01005770.1-ighv |(7257, 7566)|2.93564868712|(0.987,0.980,0.970)|1
----VQCEVQLVE-SGGGLVQPGRSLRLSCATSGFTF-S---NYWMFWVRQAPGKGLEWV
SSISGS--SSST--YYPDSVKGRFTISRDNAKNMLYLQ------MNSLRAEDTAVYYCAR
-------
>V15RF-JYKQ01005774.1-ighv |(31522, 31837)|2.96180866856|(0.981,0.998,0.984)|1
----VQCEVQLVE-SGGGLVQPGGSLRLSCAASGFTF-S---NYWMNWVRQAPGKGLEWV
GFIKNKADGGTA--AYAESVKGRFTISRDDSKNTLYLQ------MNSLKTEDTAVYYCTR
-------
>V19RF-JYKQ01005784.1-ighv |(1524, 1833)|2.8935312881|(0.983,0.940,0.978)|1
----VQCEVQLVE-SGGGLIQPGGSLRLSCAASGFTF-S---SYYMYWIRQAPGKGLEWV
SAINTG--GGST--WYADSVKGRFTISRENAKNTLYLQ------MNSLRAEDTAVYYCAK
-------
>V20RF-JYKQ01005787.1-ighv |(1654, 1969)|2.88427267285|(0.939,0.993,0.967)|1
----VQCEVQLVE-SGGGLVQPGGSLRLSCAASGFTF-S---DHYMDWVRQAPGKGPEWV
GFIRNKARGGTA--EYAASVKGRFTISRDDSKNVTYLQ------MSSLKTEDTAVYYCTT
-------
>V23RF-JYKQ01005789.1-ighv |(14344, 14653)|2.95537212748|(0.987,0.993,0.976)|1
----VQCEVQLVE-SGGGLVQPGGSLRLSCAASGFTF-S---SYGMHWARQAPGKGLEWV
SAINNG--GGST--WYADSVKGRFTISRENAKNTLYLQ------MNSLRAEDTAVYYCAK
-------
>V32RF-JYKQ01029809.1-trbv |(772, 1069)|2.75163801389|(0.897,0.907,0.968)|1
-----PANADVTQSPKFQILKTGQSMTLQCAQDMN-------HNSMYWYQQDPGMGLRLI
HYSATED--T----TDPGEVPDGYSVSRLN-KKEFLLK------LESAAPSQTSVYFCAS
SE-----
>V35RF-JYKQ01029809.1-trbv |(33264, 33561)|2.63215664392|(0.920,0.938,0.817)|1
-----PVNAGVTQTPKFQILKTGQNMTLKCAQDMN-------HNYMYWYRQDPGMGLRLI
HYSAGEG--S----TEKGEVPDGYNASRLN-PQNFLLR------LESAAPSQTSMYFCAS
SE-----
>V36RF-JYKQ01029809.1-trbv |(37007, 37307)|2.54930576921|(0.928,0.853,0.829)|1
-----HTGAGVSQSPRNKVTEEGKDVVLRCDPISG-------HTALYWYRQSLGKGLEFL
IYFQGN---DAP--DKSGLPSGRFSAERTE-GSVSTLK------IQRTEQGDSAVYLCAS
SL-----
>V37RF-JYKQ01029811.1-trbv |(568, 868)|2.54814787327|(0.886,0.867,0.816)|1
-----HTGAGVSQFPSNKVTEKGKDVALRCDPISG-------HAVLYWYRQNLGQGLEFL
IYFQGT---GAV--DDSGLRSDRFSATRPE-GSVSTLK------IRHTEQGDSATYFCAS
SL-----
>V39RF-JYKQ01029811.1-trbv |(8288, 8584)|2.43616360322|(0.889,0.728,0.922)|1
-----SVDSGVTQTPKHLITAIGQQVTLRCSPRSG-------DLSVYWYQQSLGQGLQFL
VQYYNGE---ER--EK-GNILERFSAQQFP-DLHSELN------LSSLELGDSALYFCAS
SL-----
>V41RF-JYKQ01041713.1-ighv |(30683, 30998)|2.93303223422|(0.978,0.967,0.989)|1
----VQCEVQLVE-SGGGLVQPGGSLRLSCAASGFTF-S---SSAMHWVRQASGKGLEWV
GYIRSKSNNYAT--QYAASVKGRFTISRDDSKNTLYLQ------MSSLKTEDTAMYYCTT
-------
>V43RF-JYKQ01041713.1-ighv |(51469, 51784)|2.96856084981|(0.994,1.000,0.976)|1
----VQCEVQLVE-SGGGLVQPGGSLRLSCAASGFTF-S---DHYMQWVRQAPGKGLEWV
GFIRSKAYGGTA--EYAASVKGRFTISRDDSKSIASLQ------MSSLKTEDTAVYYCAR
-------
>V45RF-JYKQ01041713.1-ighv |(71051, 71357)|2.99194800078|(0.997,0.995,1.000)|1
----VQCEVQLVE-SGGGLVQPGGSLRLSCAASGFTF-S---SYGMNWVRQAPGKGLEWV
SYISSG---GST--YYADSVKGRFTISRDNSKNTLSLQ------MNSLRAEDTAVYYCAG
-------
>V49RF-JYKQ01041718.1-ighv |(32027, 32336)|2.94844327922|(0.998,0.979,0.975)|1
----VQCEVQLVE-SGGGLVKPGASLRLSCAASGFTF-G---DYTMHWVRQAPGKGLEWV
SYISSA-S-SYI--HYADSVKGRFTISRDNAKNSLYLQ------MNSLKTEDTAVYYCTR
-------
>V51RF-JYKQ01051981.1-igkv |(559, 859)|2.89445386218|(0.968,0.982,0.947)|1
----ARCDIQMTQSPSSLSASVGDRVTITCQASQGIS------SWLAWYQQKPGKAPKLL
LY----K--AS---GLQSGVPSRFSGSGS--GTEFTLT------ISSLQPEDFATYYCQQ
FSSAL--
>V53RF-JYKQ01051984.1-igkv |(27105, 27405)|2.70617281267|(0.954,0.847,0.950)|1
----ARCDIQMNQSPSSLSASVGDTVTITCRANQGIS------NNLAWYQQKPGKVPQLL
IY----Y--AS---SLASGIPSRFSGSGS--GTEFTLT------ISSLQPEDFAAYYCLQ
HNSYP--
>V56RF-JYKQ01052451.1-igkv |(143240, 143558)|2.69234267017|(0.977,0.844,0.944)|1
----SSGDIVMTQTPLSLPVTPGEPASISCRSSQSLLDSEDGNTYLDWYLQKPGQSPQLL
IY----E--VS---NRASGVPDRFSGSGS--DTDFTLK------ISRVEAEDVGVYYCMQ
ALQNP--
>V59RF-JYKQ01054933.1-trav |(11630, 11920)|2.63663412726|(0.864,0.864,0.922)|1
----MSRGEDVEQS-LFLSVREGDISVINCTYTDS-----S-STYLYWYKQEPGAGLQLL
IYILSNM--DL---KRDQRVTVLLNKK----DKHLSLR------IADTQTEDSAIYFCAE
S------
>V60RF-JYKQ01054940.1-trav |(18103, 18397)|2.80520848353|(0.973,0.993,0.877)|1
----GINGDSVVQTEGQVLLSEGNSLIVNCSYEST-----QY-PSLFWYVQYPGEGPQLL
LKAMKD---NDK--ESNKGFEATYRKE----TTSFHLE------KDSVQESDSAVYFCAL
S------
>V61RF-JYKQ01054940.1-trav |(31345, 31638)|2.45283312171|(0.787,0.832,0.979)|1
----GSGKNQVEQSPQSLIILEGKNCTLQCNYTVS-----P-FNNLRWYKQDTGKGPISL
TIMTFSE--NT---KSNGRYIATLDAD----TKQSSLH------ITAAQLSDSASYICVV
S------
>V62RF-JYKQ01054940.1-trav |(46970, 47276)|2.37385750893|(0.924,0.733,0.866)|1
---VWSQQKEVEQDPGPFSVPEGATVTFNCTYSNS-----A-SQSFFWYRQDSRKEPKLL
MSAYSSG--N-----EDGRFTAQLNRA----SQYISLL------IRDSQLSDSATYLCAV
YTQCSP-
>V63RF-JYKQ01054940.1-trav |(52430, 52727)|2.36965541354|(0.956,0.778,0.823)|1
----GTRAQSVTQLDSQVSVSEGAPVLLRCNYSSS-----VP-PYLFWYVQYPNQGLQLL
LKYTSGT--TLV--KGINGFEAEFKKS----ETSFHLR------KASAHVSDAAEYFCAV
S------
>V64RF-JYKQ01054942.1-trav |(16188, 16478)|2.65819665617|(0.927,0.816,0.971)|1
-----VNGENVEQHPSILSVQEGDSSVIKCTYSDS-----A-SNYFPWYKQELGKEPQFI
IDIRSNA--HE---KKDQRITVLLNKT----AKHFSLH------ITETQPGDSAVYFCAA
S------
>V65RF-JYKQ01054942.1-trav |(38704, 38992)|2.75839485041|(0.905,0.898,0.975)|1
---VWS-QQKVEQNSGPLSVPEGAIASLNCTYSDR-----G-SQSFFWYRQYSGQSPELL
MSTYSSG--DK----EDGRFTAQLNRA----SQYVSLL------IRDSQPSDSATYLCAV
-------
>V68RF-JYKQ01054942.1-trav |(64627, 64920)|2.39276528132|(0.930,0.895,0.726)|1
----VSRGESVGLHLPTVSVQEGDNSVINCTYSDS-----A-SDYFLWYKQESGKGPQSI
IDIRSNM--AK---RQGQRLTVFLNKT----MKHLSLQ------IAATEPGDSAVYFCAE
N------
>V69RF-JYKQ01054942.1-trav |(70517, 70818)|2.50844607516|(0.936,0.816,0.845)|1
----SGIAQKITQTQPAMFVQEKEAVTLDCTYDTS-----DQSYGLFWYKQPSSGEMIFL
ILQMSYD--KQN--ATEGRYSLNFQKA----RKSVNLV------ISASQVGDSAMYFCAM
R------
>V70RF-JYKQ01054942.1-trav |(88856, 89150)|2.71167100508|(0.929,0.881,0.912)|1
----RTRGDSVTQMEGPVTLSERAFLTINCTYTAT-----GY-PSLFWYVQYPGEGPQLL
LKATKT---DEK--GSNKGFEATYRKE----TTSFHLK------KDSVQESDSAVYFCAL
S------
>V71RF-JYKQ01054942.1-trav |(113522, 113815)|2.70725869849|(0.896,0.883,0.935)|1
---VWSQQKEVEQNPGPLSVPEGATASLNCTYSNS-----A-FQYFMWYRQYSRKGPQLL
IYIYSSG--NK----EDGRFTAQVDKS----SKYISLF------IRDSQPNDSATYFCAM
S------
>V73RF-JYKQ01054953.1-trav |(3497, 3784)|2.74722051637|(0.928,0.938,0.888)|1
-----VNSQQGEEDPQTLSIQEGENATMNCSYKT------S-INNLQWYRQDSGRSLVQL
ILIRSNE--RE---KNSGRLRVTLDTS----KKSSSLL------ITASRAADTASYFCAT
D------
>V78RF-JYKQ01062966.1-iglv |(12021, 12331)|2.77535067488|(0.937,0.903,0.940)|1
----SWAEVVFTQ-PHSVSGSPGQTVTISCTRSSG---SID-SSYVYWYQQRPGSAPTTV
IY----S--DD---QRPSGVPDRFSGSIDSSSNSASLT------ISGLKSEDEADYYCQS
YDSSS--
>V80RF-JYKQ01067101.1-ighv |(5042, 5351)|2.86107818339|(0.983,0.991,0.909)|1
----TQSQVQLVQ-SGAEVKKPGASVKLSCKASGYTF-T---SYGINWVRQAPGQGLEWM
GWINPS-N-GNT--GYAQKFQGRVTMTRDTSTSTAYME------LNSLRSDDTAVYYCAR
-------
>V84RF-JYKQ01114545.1-iglv |(3565, 3871)|2.71796429359|(0.882,0.959,0.902)|1
-----DSETVVTQ-EPSLSVSSGGTVTLTCGLSSG---SVSTSNYPSWYQQTPGQAPRTL
IY----R--TN---TRPSGVPDRFSGSIL--GNKAALT------ITGAQADDESDYYCML
YMGSGI-
>V88RF-JYKQ01131090.1-trbv |(36297, 36594)|2.8245959051|(0.980,0.963,0.905)|1
-----PVNAGVTQTPKFQILKTGQSMTLQCAQDMN-------HDCMYWYRQDPGMGLRLI
HYSVGEG--S----TDKGEVPDGYNVTRSN-TEDFPLR------LESAAPSQTSVYFCAS
SY-----
>V89RF-JYKQ01131090.1-trbv |(40488, 40788)|2.45920365021|(0.903,0.734,0.934)|1
-----HTGAGVSQSPRYKVTKRGQDVALRCDPISG-------HDYLYWYQQAPGQGPAFL
TYFQND---AQR--DKSGLPNDRFSAEMPE-GSVSTLK------IQRTEQGDSAVYLCAS
SL-----
>V92RF-JYKQ01131090.1-trbv |(60130, 60430)|2.71034553085|(0.921,0.885,0.910)|1
-----HTGAGVSQSPRYKVTKRGQDVALRCDPISG-------HVALYWYRRTLGQGPEFL
TYFQND---AQP--DKSGLPSDRFSAERPE-GSVSTLK------IQRTEQGDAAVYLCAS
SL-----
>V95RF-JYKQ01131092.1-trbv |(3324, 3621)|2.61482253632|(0.889,0.961,0.810)|1
-----LVNAGVTQTQKFQVLKTGQSMTVQCAQDMN-------HDCMYWYRQDPGMGLRLI
HYSDAAG--T----TDKREVPSGYNVSRLN-IEDFPLR------LESAAPSQTSVYICAS
SY-----
>V98RF-JYKQ01131093.1-trbv |(22892, 23189)|2.76451845765|(0.946,0.911,0.916)|1
-----PGNAGVTQTPKFQILKTGQSMTLQCAQDMN-------HNYMSWYRQDPGVGLRLI
HYSVGAG--V----TDKGEVSNGYNVSRLN-TEDFPLS------LESAASSQTSVYFCAS
SY-----
>V99RF-JYKQ01131094.1-trbv |(5376, 5676)|2.58303477024|(0.945,0.779,0.965)|1
-----HTGAGVSQFPRYRVTKRGQDVTLRCDPISG-------HEYLYWYQQAPGQGPELL
TYFQND---AQL--DKSGLPSDRFSAERTE-GSVSTLK------IQRTEQGDSAVYLCAS
SL-----
>V100RF-JYKQ01131094.1-trbv |(13819, 14115)|2.48796656701|(0.932,0.770,0.892)|1
-----PVDTGVTQSPTHLIKTRGQQVILRCSPISG-------HSSVYWYQQALGQGPQFI
FEYYEKE---ER--GR-GNFPDRFSGRQFP-NYSSELN------VSALLLGDSALYLCAS
SL-----
>V101RF-JYKQ01131094.1-trbv |(21287, 21594)|2.5865318494|(0.912,0.835,0.870)|1
-----PGNADVTQTPKFQVLKTGQSLTLQCAQDMN-------HNYMYWYRQDPGMGLRLI
HYSVGAG--I----TDKGEVPNGYNVFRLN-TEDFPLR------LESAALSQTSVYFCAS
SDTTV--
>V102RF-JYKQ01131095.1-trbv |(9158, 9454)|2.55998884907|(0.930,0.797,0.904)|1
-----PVDTGVTQSPTHLIKMRGQQVTLRCSPISG-------HSSVSWYQQALGQGPQFI
FQYYEKE---ER--GR-GNFPDRFSGRQFP-NYSSELN------VSALLLGDSALYLCAS
SL-----
>V103RF-JYKQ01131096.1-trbv |(2555, 2846)|2.5148750933|(0.919,0.943,0.756)|1
-------NAGVTQTPKFQVLKTGQSMIVQCAQDMK-------HDYMFWYRQDPGMGLRLI
YYSVTAG--I----TTKGEVPNGYNVSRIN-TEDFLLR------LESAAPSQTSVYFCAS
SY-----
>V104RF-JYKQ01131098.1-trbv |(4345, 4645)|2.69999882769|(0.904,0.856,0.963)|1
-----HTGAGVSQSPRYKVIKKGQDVALRCDPISG-------HAGLYWYQQALGQGPEFL
TYFNYQ---AQP--DKSGLPNDRFSAERHE-GSVSTLT------IQRTEQQDSAVYLCAS
SL-----
>V106RF-JYKQ01131101.1-trbv |(9053, 9353)|2.64874224752|(0.874,0.897,0.880)|1
-----HTDARVSQDPRHKITKTGQNVSFKCVPISE-------HNRLYWYRQTLGQGPEFL
TYFQNEA---QQ--DRSGLFSDRFSAERPE-GSISTLM------IQHTEQGDSAVYLCAS
SL-----
>V108RF-JYKQ01131101.1-trbv |(23980, 24277)|2.68231017975|(0.921,0.912,0.863)|1
-----HMDAGITQSPRHKITETGTPVTLRCHQTEN-------HRYMYWYRQDLGRGLRLI
HYSYGVE--D----TDKVEVSDGYSVSRSK-TEDFLLT------LESATRSQTSVYFCAS
SE-----
>V110RF-JYKQ01131102.1-trbv |(2948, 3248)|2.49240197492|(0.931,0.967,0.738)|1
-----HTDAGVIQSPRHKVTEMGKEVTLRCEPISG-------HTYLFWYRQTMMQGLEFL
IYFNNK---DPT--DDSGMPKDRFSAKMPN-ASFSTLK------IQPSEPRDSAVYFCAS
SL-----
>V116RF-JYKQ01131104.1-trbv |(2283, 2580)|2.53145834685|(0.890,0.900,0.785)|1
-----TVDGGITQSPKYVFRKEGQNVTLSCEQNLN-------HNAMYWYRQDPGQGLRLI
YYSQIVN--D----IQKGDIAEGYSVSRER-KQSFPLT------VTSAQRNPTAFYLCAS
SI-----
>V118RF-JYKQ01131105.1-trbv |(770, 1075)|2.45629183767|(0.866,0.816,0.801)|1
-----SFHAEVTQTPGYLVKGKGQKTKMDCTPEKG-------HTYVYWYQQNQNKEFTFL
ISFQDEQ---VL--QETELHKKRFSSQCRK-NLPCSLE------IPSSEPGDTALYLCAS
SQST---
>V119RF-JYKQ01131107.1-trbv |(8150, 8448)|2.69160939495|(0.907,0.937,0.860)|1
-----SMDADVTQTPRNKIAKTGKRIMLECSQTKG-------HDQMYWYRQDPGLGLRLI
YYSFDVQ--D----INKGEISDGYSVSRQE-QAKFSLS------LESATPNQTALYFCAT
SD-----
>V122RF-JYKQ01131110.1-trbv |(26751, 27058)|2.60581084009|(0.855,0.867,0.889)|1
-----LVDVKVTQSSRYLIKRTGEKVFLECVQDMD-------HERMFWYRQDPGLGLRLI
YFSYDVK--L----NEKGDIPEGYSVSREK-KERFSLI------LGSTSTNQTSMYLCAS
SLSTA--
>V123RF-JYKQ01131111.1-trbv |(5907, 6210)|2.52369755945|(0.871,0.774,0.929)|1
----SVFSAVISQKPSRDVCQRGTSVTFQCQVDSQ-------VTMMFWYRQRPGQSMTLI
ATANQGS--EAT--YESGFVIDKFPISRPN-LTFSTLT------VSNTSPEDSSIYLCSV
E------
>V125RF-JYKQ01135388.1-trav |(4501, 4803)|2.75290741148|(0.932,0.924,0.901)|1
----SGMAQTVTQSQPEMSVQEAETVTLSCTYDTS-----ESNYYLFWYKQPPSRQMILI
IRQEAYK--QQN--ATENRFSVNFQKA----TKSFSLK------ISDSQLGDAAMYFCAY
RS-----
>V126RF-JYKQ01135389.1-trav |(2804, 3092)|2.49662047425|(0.819,0.800,0.916)|1
----LSGELKVGQNPLFLSTQEGKNYTIYCNYSTA-------SDRLYWYRQDPGKSLESL
FVLLSNG--AV---KQEGRLMASLDTK----ARLSSLH------ITAALQDLSATYFCAV
-------
>V129RF-JYKQ01187337.1-igkv |(7825, 8116)|2.68886312132|(0.942,0.823,0.987)|1
--------IVLTQSPTSMAVSQGERVTISCTASSSVS-----TSYLHWYQQKPGFPPRLL
VY----R--TS---NLASGVPARFSGSGS--GTSYTLT------ISSMEAEDAANYYCQQ
GNSIP--
>V130RF-JYKQ01245859.1-ighv |(891, 1200)|2.87905723435|(0.994,0.940,0.961)|1
----AHSQVQLVQ-SGAEVKKPGASVKVSCKASGYTF-T---DYYMHWVRQAPGQGLEWI
GWINPY-N-GNT--KYAQKFQGRVTMTRDTSTSTAYME------LSSLRSEDTAVYYCAR
-------
>V132RF-JYKQ01245874.1-ighv |(37996, 38302)|2.96160004313|(0.992,0.986,0.984)|1
----VQCEEQLVE-SGGGLVQPGASLRLSCAASGFTF-S---SYDMHWVRQAPGKGLEWV
SAISIG---GGT--YYPDSVKGRFTVSRDNAKNSLYLQ------MNSLRAEDTAVYYCAR
-------
>V134RF-JYKQ01245876.1-ighv |(36255, 36564)|2.9898400105|(0.994,1.000,0.996)|1
----VQCEVQLVE-SGGGLVQPGGSLRLSCAASGFTF-S---SYWMNWVRQAPGKGLEWV
SRINSD-G-SST--NYADSVKGRFTISRENAKNSLYLQ------MNSLRAEDTAVYYCTT
-------
>V135RF-JYKQ01245880.1-ighv |(7638, 7950)|2.97696000066|(0.993,0.994,0.990)|1
----VQCEVQLVE-SGGGLVQPGGSLRLSCVASGFTF-S---DYYMHWARQAPGKGLEWV
SRISSG-SGSST--YYPDSVKGRFTISRDNAKNTLYLQ------MNSLRAEDTAVYYCAR
-------
>V136RF-JYKQ01245881.1-ighv |(6177, 6492)|2.97294239438|(0.979,1.000,0.997)|1
----VQCEVQLVE-SGGGLVQPGGSLRLSCAASGFTF-S---DHYMDWVRQAPGKGLEWV
GFIKNKADGGTA--DYAASVKGRFTISRDDSKNTLYLQ------MNSLKTEDTAVYYCTR
-------
>V139RF-JYKQ01245886.1-ighv |(241, 551)|2.97245211916|(0.996,0.992,0.985)|1
----FQCEVQLVE-SGGGLVQPGGSLRLSCVASGFTF-S---DHYMDWVRQAPGKGLEWV
SSISTGSG-STT--LYPDSVKGRFTISRDNAKNTVYLQ------MNSLRAEDTAVYYCA-
-------
>V140RF-JYKQ01245888.1-ighv |(1665, 1980)|2.93088400513|(0.976,0.981,0.974)|1
----VQCEVQLVE-SGRGLVQPGGSLRLSCAVSGFTF-S---DHYVSWVRQAPGKGLEWV
GFMRNKANGGRT--EYAASVKGTFTISRDDSKSIASLQ------MSSLKTEDTAVYYCAR
-------
>V141RF-JYKQ01245888.1-ighv |(18543, 18855)|2.89277285433|(0.983,0.976,0.941)|1
----VLSQVQLQE-SGPGVVKPSETLSLTCAVSGGSI-S--DSYYWSWIRQAPGKGLEWI
GGIYGS--GSST--NYNPSLKSRVTISKDTSKNQFSLK------LSSVTAADTAVYYCAR
-------
>V142RF-JYKQ01245889.1-ighv |(13016, 13325)|2.96780001921|(0.992,0.991,0.985)|1
----VQCEVQLVE-SGGGLAQPGGSLRLSCAASGFTF-S---SYGMSWVRQAPGKGLEWV
SGISNT--GGSI--YYADSVKGRFTISRDNSKNTLSLQ------MNSLRAEDTAVYYCAK
-------
>V143RF-JYKQ01245890.1-ighv |(4928, 5237)|2.89725001439|(0.949,1.000,0.959)|1
----VQCDVQLVE-SGGGLVKPGGSLRLSCVASGFTF-S---SYAMHWVRQAPGKGLEWV
SVISTS-G-GTT--YYADSVKGRFTISRDNAKNSLFLQ------MNSLRAEDTAVYYCTR
-------
>V145RF-JYKQ01245904.1-ighv |(629, 938)|2.93843897096|(0.992,0.997,0.955)|1
----VQCEVQLVE-SGGGVVQPGGSLRLSCAASGFTF-D---DYAMGWVRQAPGKGLEWV
SAISWD--GDST--GYADSVKGRFTISRDNAKNSLSLQ------MNSLRAEDTAVYYCAR
-------
>V146RF-JYKQ01005004.1-igkv |(7879, 8179)|2.77762014931|(0.950,0.875,0.978)|-1
----TTGETVMTQSPATLSLSPGERATLSCRASQSV------GSSLAWYQQKPGQAPRLL
VY----Y--AS---SRATGIPDRFSGSGS--GTDFTLT------ISSLDPEDVGVYYCQK
YNDWP--
>V147RF-JYKQ01005007.1-igkv |(665, 964)|2.73708566337|(0.993,0.879,0.931)|-1
----TTGEIVMTQSPATLSLSPGERATLSCRASQSVG------SYLAWYQQKPGQAPRLL
IY----G--AS---SRATGIPDRFSGSGS--GTEFTLT------ISSLEPEDFAVYYCQQ
YNNWN--
>V148RF-JYKQ01005012.1-igkv |(8346, 8639)|2.94555643843|(0.996,1.000,0.956)|-1
----ARCDIQMTQSPSSLSASVGDRVTITCRASQGIS------TYLNWYQQKPGKAPKLL
IY----A--AS---SLQSGVPSRFSGSGS--GTVFTLT------ISSLQSEDFATYYCLQ
YNS----
>V149RF-JYKQ01005013.1-igkv |(2914, 3214)|2.97375601537|(0.991,0.986,0.997)|-1
----AKCDIQMTQSPSSLSASVGDRVTITCRASQGIS------SYLAWYQQKPGKAPKPL
IY----Y--AS---NLESGVPSRFSGSGS--GTDFTLT------ISSLQPEDFATYYCQQ
YNSAP--
>V150RF-JYKQ01005014.1-igkv |(6504, 6804)|2.97282001102|(0.994,0.988,0.991)|-1
----ARCDIQMTQSPSSLSASAGDRVTITCRASQGIS------SYLAWYQQKPGKAPKLL
IY----D--AS---NLQSGVPSRFSGSGS--GTEFTLT------ISSLQPEDFAVYYCQQ
RNSYP--
>V153RF-JYKQ01005018.1-igkv |(13195, 13495)|2.97870083945|(0.999,1.000,0.981)|-1
----ARCDIQMTQSPSSLSASVGDRVTITCRASQGIS------TYLNWYQQKPGKAPKLL
IY----A--AS---RLESGVPSRFSGSGS--GTEFTLT------ISSLQPEDFATYYCQQ
YNSNP--
>V155RF-JYKQ01005022.1-igkv |(4846, 5146)|2.98178801933|(0.997,0.990,0.995)|-1
----ARCDIQMTQSPSSLSASAGDRVTITCRASQGIS------TYLNWYQQKPGKAPKLL
IY----A--AS---SLQSGVPSRFSGSGS--GTEFTLT------ISSLQPEDFATYYCQQ
YNSYP--
>V156RF-JYKQ01005026.1-igkv |(2797, 3089)|2.97456408064|(0.996,0.993,0.986)|-1
----AKCDIQMTQSPSSLSASVGDRVTITCRASQTIS------SYLAWYQQKPGKVPKLL
IY----A--AS---SLESGVPSRFSGSGS--GTEFTLT------ISSLQPEDFATYYCQQ
HN-----
>V157RF-JYKQ01005027.1-igkv |(25376, 25667)|2.86870752475|(0.975,0.946,0.953)|-1
-------DIQMTQSPASLSASVGDRVTITCRASQSFS------SSLAWYQQKPGKAPKLL
IY----S--AS---SLQSGVPSRFSGSKS--GTDFTLT------ISSLQPEDIASYYCQQ
YYSTP--
>V158RF-JYKQ01005032.1-igkv |(9334, 9634)|2.66684418174|(0.986,0.839,0.935)|-1
----TTGQVILTQSPATLSLSPGERATLSCRASQSV------SSNLAWYQQKPGQAPRLL
IY----G--AS---SRATGIPDRFSGSGS--GTEFTLT------ISSLEPEDFAVYYCQK
YSSSP--
>V160RF-JYKQ01005033.1-igkv |(2883, 3181)|2.6901013405|(0.964,0.820,0.988)|-1
----SKGEIVLTQSPAFRSVTLKEKVTITCQASQSIG------SSLHWYQQKPDQSPKLL
IK----Y--AS---QSISGVPSRFSGSGS--GTDFTLT------INSLEAEDAATYYCQQ
SRSF---
>V164RF-JYKQ01015003.1-ighv |(1329, 1641)|2.8890138344|(0.982,0.985,0.932)|-1
----VLSQVQLQE-SGPGLVKPSETLSLTCAVSGGSI-S--GSYGWNWIRQPPGKGLEWI
GRIYGS-S-GNT--YYNPSLKSRVTISRDTSKNQFSLK------LSSVAAADTAVYYCAR
-------
>V171RF-JYKQ01026663.1-trav |(902, 1202)|2.35351845765|(0.809,0.774,0.779)|-1
----SSVAQKVTQTQSSVSMPVEKAVTLNCQYETSR----WS-YYLFWYKQPPSKEMIFL
IRQGSSE--P-N--AKSGRYSVNFQKA----ASSIALT------ISALQLEDSATYFCAL
WE-----
>V177RF-JYKQ01042861.1-ighv |(9368, 9683)|2.96942416586|(0.994,0.994,0.982)|-1
----VQCEVQLVE-SGGGLVQPGGSLRLSCAASGFTF-S---DYYMYWVRQAPGKGLEWV
GFIRSKAYGGTA--EYAASVKGRFTISRDDSKSIASLQ------MNSLRAEDTAVYYCTR
-------
>V178RF-JYKQ01044654.1-igkv |(1250, 1550)|2.90929455551|(0.986,0.945,0.985)|-1
----ARCDIQMTQSPSSLSASVGDKVTITCHASQGIS------SWLAWYQQKPGKAPKPL
IY----K--AS---SLQSGVPSRFSGSGS--GTDFTLT------ISSLQPEDFATYYCQQ
NSSSP--
>V180RF-JYKQ01044662.1-igkv |(2570, 2870)|2.96436078502|(0.998,0.981,0.987)|-1
----AKCDIQMTQSPPSLSASVGDRVTITCRASQGIS------NWLAWYQQKPGEAPKLL
IY----A--AS---TLQSGVPSRFSGSGS--GTEFTLT------ISSLQPEDFATYYCQQ
HNSYP--
>V182RF-JYKQ01052439.1-igkv |(123, 425)|2.67669264262|(0.944,0.960,0.827)|-1
----SSGDVVMTQSPLSLSVTIGQPASISCRSSQSLVH-SDGKTYLNWLQQKPGQPPRRL
IY----Q--VS---NRDSGVPDRFSGSGA--GTDFTLK------ISRVETEDVGVYYCVQ
G------
>V184RF-JYKQ01052440.1-igkv |(29428, 29728)|2.89712851976|(0.995,0.943,0.972)|-1
----ARCDIQLTQSPSSLSASVGDRVTITCQASQGIS------NNLAWYQQKPGKVPKLL
IY----A--AS---TLQSGVPSRFSGSGS--GTDFTLT------ISSLQPEDFATYYCQH
GYGTP--
>V188RF-JYKQ01052440.1-igkv |(90005, 90305)|2.98028822908|(0.997,1.000,0.984)|-1
----ARCDIQMTQSPSSLSASVGDRVTITCRASQGIS------NYLNWYQQKPGKAPKLL
IY----R--AS---NLETGVPSRFSGSGS--GTDFTLT------ISSLQPEDIATYYCQK
HDNSP--
>V190RF-JYKQ01052440.1-igkv |(120035, 120335)|2.95702032645|(0.993,0.979,0.986)|-1
----ARCDIQMTQSPSSLSASIGDRVTITCRASQNIY------SNLAWYQQKPGKAPKPL
IY----Y--AS---SVETGVPSRFSGSGS--GTDYTLT------ISSLQPEDVATYYCQQ
YDNSP--
>V191RF-JYKQ01052441.1-igkv |(8581, 8881)|2.98999600001|(0.997,0.997,0.996)|-1
----ARCDILMTQSPASLSASVGDRVTITCRASQGIS------NYLAWYQQKPGETPKLL
IY----A--AS---SLQSGIPSRFSGSGS--GTDFTLT------ISSLQPEDFATYYCQH
YYSTP--
>V193RF-JYKQ01052443.1-igkv |(11550, 11850)|2.95354950736|(0.997,0.979,0.980)|-1
----ARCDIQMTQSPSSLSASVGDRVTITCQASQSLS------NYLNWYQQKPGKIPKLL
IY----G--AS---SLQSGIPSRFSGSGS--GTDYTLT------ISSLQPEDFATYYCQQ
GYSNP--
>V197RF-JYKQ01052444.1-igkv |(27757, 28057)|2.83282969051|(0.914,0.976,0.971)|-1
----ARCDIQMTQSPSSLSASVGDRVTITCRASQGIN------KELAWYQQKPGKAPMLL
LY----S--GS---SLHTGVPSQFSGSGS--GTDFTLT------ISSLQPEDVATYYCRQ
DYTTP--
>V199RF-JYKQ01052444.1-igkv |(45830, 46130)|2.96019965751|(0.998,0.972,0.993)|-1
----ARCDIQMTQSPSSLSASVGDRVTITCRASQGIG------NYLAWYQQKPGETPKLL
IY----A--AS---SLQSGIPSRFSGSGS--GTDYTLT------ISSLQPEDFATYYCQQ
GYSNP--
>V201RF-JYKQ01052450.1-igkv |(9881, 10181)|2.89578802605|(0.979,0.933,0.993)|-1
----ARCDIQMTQSPSSLSASVGDRVTITCRASQSIN------KELDWYQQKPGKAPTLL
IY----A--AS---SLQTGVSSRFSGSGS--GTDFTLT------ISSLQPEDVATYYCQQ
DYTTP--
>V203RF-JYKQ01056010.1-ighv |(10615, 10921)|2.95557605748|(0.984,0.993,0.979)|-1
----VQCEVQLVE-SGGGLVQPGGSLRLSCAASGFTF-S---SYAMQWVHQAPGKGLEWV
SAIGP--G-GDT--YYADAVKGRFTISRDNAKNSLYLQ------MNSLRAEDTAVYYCAR
-------
>V205RF-JYKQ01062878.1-ighv |(882, 1191)|2.94338299634|(0.998,0.982,0.968)|-1
----VQCEVQLVE-SGGGLVKPGASLRLSCAASGFTF-S---SYGMHWVRQAPGKGLEWV
SYISSD--SSYI--YYADSVKGRFTISRDNAKNSLSLQ------MNSLKTEDTAVYYCAR
-------
>V206RF-JYKQ01062881.1-ighv |(1585, 1894)|2.88810860018|(0.991,0.973,0.937)|-1
----AHSQVQLVQ-SGAEVKKPGSSVKVSCKASGYTF-T---DYYMQWVRQAPGQGLEWM
RWINPY-N-GNT--KYAQKFQGRVTMTRDTSTSTAYME------LSSLRSEDTAVYYCAT
-------
>V213RF-JYKQ01075085.1-igkv |(254, 554)|2.92750885865|(0.968,0.975,0.986)|-1
----ARCDIQMSQSPPSLSASVGDRVTITCQACQGIS------NYLAWYQQKPGKAPKLL
IY----A--AS---TLQSGVPSRFSGSGS--GTEFTLT------ISSLQPEDFATYYCQQ
RNSYP--
>V214RF-JYKQ01076935.1-igkv |(39827, 40127)|2.98866005261|(1.000,0.998,0.991)|-1
----ARCDIQMTQSPSSLSASVGDTVTITCQASQGIS------DYLAWYQQKPGKAPKLL
IY----A--AS---NLESGVPSRFSGSGS--GTEFTLT------ISSLQPEDFATYYCQQ
YDSDP--
>V215RF-JYKQ01076937.1-igkv |(20686, 20986)|2.90773926526|(0.946,0.978,0.999)|-1
----ARCDIQMSQSPSSLSASVGDRVTITCRASQGIS------NALAWFQQKPGKAPKLL
IY----A--AS---SLQSGVPSRFSGSGS--GTDYTLT------ISSLQPEDFATYYCQQ
GYSTP--
>V216RF-JYKQ01076937.1-igkv |(32283, 32583)|2.97442008525|(0.992,1.000,0.983)|-1
----ARCDIQMTQSPSSLSASVGDRVTITCRASQGIS------SYLNWYQQKPGKAPKLL
IY----Y--AT---SLESGVPSRFSGSGS--GTEFILT------ISSLQPEDFATYYCQQ
HNSYP--
>V219RF-JYKQ01080923.1-iglv |(36388, 36700)|2.79921648788|(0.957,0.880,0.990)|-1
----SWAEVVFTQ-PHSVSGSPGQTVTISCTRSSG---SID-SKYVQWYQQRPGSAPTTV
IY----E--DN---KRPSGVPDRFSGSIDSSSNSASLT------ISGLKSEDEADYYCQS
ADGSYT-
>V221RF-JYKQ01081225.1-igkv |(3273, 3573)|2.9388502378|(0.987,0.990,0.964)|-1
----ARCDIQMTQSPSSLSASVGDKVTITCQASQSIS------SWLTWYQQKPGKAPKLL
IY----K--AS---TLQSGVPSRFSGSGS--GTEFTLT------ISSLQPEDFATYYCQQ
FSSAP--
>V226RF-JYKQ01126545.1-iglv |(13640, 13950)|2.86533586923|(0.991,0.932,0.960)|-1
----SWAQAALTQ-PPSVSGSPGQSVTISCTGTSS---DIGGYNYVSWYQQHPGKAPKLM
IY----D--VS---KRPSGVSDRFSGSKS--GNTASLT------ISGLQAEDEADYYCSS
YASSST-
>V229RF-JYKQ01126545.1-iglv |(48188, 48491)|2.65341399606|(0.980,0.817,0.959)|-1
----SWAQAALTQ-PHSVSGSPGQSVTISCTGTSS---DIGGYDRVSWYQQHPGKAPKLM
IY----E--VS---KRPSGVSDRFSGSKS--GNTASLT------ISGLQAEDEADYYCSS
YAGS---
>V230RF-JYKQ01126545.1-iglv |(71572, 71866)|2.61733612255|(0.855,0.873,0.898)|-1
-------QSALIQ-SPSVSGSLGQSVTISCTGTSS---DIGRYNYVSWYQQQPGTTTKLM
MY----N--VN---TRPSGVSDRFSGSKS--GNTASLT------ISGLQAEDEADYYCSS
YEAS---
>V232RF-JYKQ01126546.1-iglv |(24524, 24827)|2.88884201202|(0.994,0.932,0.979)|-1
----SWAQSALTQ-PPSVSGSPGQSVTISCTGTSS---DVGGYSYVSWYQQHPGKAPKLM
IY----G--VS---NRPSGVSDRFSGSKS--GNTASLT------ISGLQAEDEADYYCCS
YTTS---
>V233RF-JYKQ01126546.1-iglv |(36976, 37279)|2.59605092094|(0.974,0.810,0.924)|-1
----SAASYDLTQ-PPSVSVSPGQTARITCGG------DNIESEAVHWYQQKPPQAPVLV
IY----A--DS---ERPSGIPERFSGSKS--GNTATLT------ISGVEAGDEADYYCQM
WDSSSKH
>V235RF-JYKQ01126546.1-iglv |(60437, 60740)|2.70439333583|(0.978,0.844,0.954)|-1
----SAASYDVTQ-PRSVSVSPGQTARITCGG------DNIGSKYVQWYQQKPAQAPVLV
IY----D--NS---DRPSGIPERFSGSNS--GNTATLT------ISGVEAGDEADYYCQV
WDSSSDH
>V237RF-JYKQ01126546.1-iglv |(71769, 72072)|2.80322227004|(0.983,0.928,0.920)|-1
----SWAQAALTQ-PPSVSGSPGQSVTISCTGTSN---DVGGYNYVSWYQQHPGKALKLM
IY----E--VS---KRPTGVSDRFSGSKS--GNTASLT------ISGLQAEDEADYYCGS
YSGS---
>V240RF-JYKQ01126546.1-iglv |(116413, 116723)|2.84846185501|(0.997,0.968,0.914)|-1
----SWAQSALTQ-PPSVSGSPGQSVTISCTGTSS---DVGGYNYVSWYQQHPGKAPKLM
IY----E--VS---KRPSGVSDRFSGSKS--GNTASLT------ISGLQAEDEADYYCSS
YRSSNT-
>V244RF-JYKQ01126580.1-iglv |(2043, 2350)|2.89267367457|(0.987,0.945,0.969)|-1
----SWAQSVLTQ-PPSVSGDPGQRVTISCTGSSS---NIG-GYDVYWYQQVPGTAPKLL
IY----D--NN---KRPSGVSDRFSGSKS--GTSASLT------ITGLQTEDEADYYCQS
YDSSLS-
>V245RF-JYKQ01126580.1-iglv |(7851, 8158)|2.83087356572|(0.918,0.970,0.961)|-1
----SWAQSVLTQ-PPSVSGAPGQKVTISCTGSSS---NIG-GYNVYWYQLLPGTAPKLL
IY----D--NN---KRPSGISDRFSGSKS--GTSASLA------ITGLQSEDEADYYCQS
YDSSLS-
>V246RF-JYKQ01126581.1-iglv |(5729, 6039)|2.77368220432|(0.969,0.924,0.905)|-1
----SLSQPVLTQ-PASLSASPGASARLTCTLSSG---INVGSYSIYWYQQKPGSPPRYL
LYYYSDS--DK---HQGSGVPSRFSGSKDASANAGLLL------ISGLQSEDEADYYCAI
-------
>V248RF-JYKQ01126581.1-iglv |(20501, 20808)|2.91756228963|(0.984,0.961,0.975)|-1
----SWAQSVLTQ-PPSVSGAPGQRVTISCTGSSS---NIG-GYYVQWYQQLPGTAPKLL
IY----G--NN---KRPSGVSDRFSGSQS--GTSASLA------ITGLQSEDEADYYCEA
WDNSLS-
>V250RF-JYKQ01126585.1-iglv |(12290, 12599)|2.85550966025|(0.980,0.907,0.990)|-1
----SWAQSVLTQ-PPSASGAPGQRVTISCSGSSS---NIG-SNYVSWYQQLSGKAPKLL
IY----K--NN---QRPSGVPDRFSGSKS--GNSASLA------ISGLQSEDEADYYCAA
WDDSLSG
>V255RF-JYKQ01126589.1-iglv |(2854, 3164)|2.90136442834|(0.991,0.950,0.969)|-1
----SWAQSVLTQ-PPSVSGAPGQRVTISCTGSSS---NIGAGYYVQWYQQLPGTAPKLL
IY----E--NN---KRPSGVTDRFSGSKS--GTSASLT------ITGLQSEDEADYYCQS
YDSSLS-
>V257RF-JYKQ01126589.1-iglv |(33453, 33763)|2.60629056851|(0.968,0.842,0.885)|-1
----SLSQPVLTQ-PTSLSASPGASARLTCTLRSG---ISVGSYRIYWYQQKPGSPRRYL
LNYYSDS--DK---HQGSGVPSRFSGSKDASANAGILL------ISGLQPEDEADYYCMI
-------
>V258RF-JYKQ01126589.1-iglv |(38258, 38567)|2.85416172767|(0.991,0.904,0.989)|-1
----SWAQSVLTQ-PPSASGAPGQRVTISCSGSSS---NIG-SNYVYWYQQFPGTAPKLL
IY----Y--SN---QRPSGVPDRFSGSKS--GTSASLA------ITGLQSEDEADYYCAA
WDNSLSG
>V262RF-JYKQ01187347.1-igkv |(14093, 14411)|2.73740999771|(0.971,0.843,0.988)|-1
----ACGDIVMTQSPDSLAVSLGERVTINCKSSQSLLYSSNNKNYLAWYQQKPGQAPKLL
IS----W--AS---TRESGVPNRFSGSGS--GTDFTLT------ISGLQAEDVAVYYCQQ
HYSSP--
>V263RF-JYKQ01237599.1-ighv |(479, 788)|2.92772550775|(0.979,0.959,0.992)|-1
----VQGEVQLVE-SGGGLSKPGGSLRLSCAASGFTF-S---DYNMHWVRQASGKGLEWV
SGISND-G-GST--WYADSVKGRFTISRENAKNTLYLQ------MNSLRAEDTAVYYCAG
-------
>V0RF-AQIB01018214.1-trgv |(163723, 164036)|2.48808706409|(0.920,0.852,0.795)|1
----SQKSSNLEGRTKSVTRPTGSSAEITCDLPEV-----S-SFYIHWYLHQEGKAPQRL
LYYDTSN--SRV-VLESGISSGKYDSYGST-RRNLRLI------LRNLIENDSGVYYCAN
WD-----
>V1RF-AQIB01018215.1-trgv |(1470, 1783)|2.47631281765|(0.915,0.762,0.891)|1
----SQKSSNLEGRTKSVTRPTGSSAEITCDFSGD-----S-NFYIHWYLHQEGKAPQRL
LYYDVSN--SRD-VLESGLSPGKYYTHTRK-RWSWILI------LRNLIENDSGVYYCAN
WN-----
>V2RF-AQIB01018217.1-trgv |(6282, 6595)|2.40675752244|(0.900,0.852,0.750)|1
----SQKSSNLEGRTKSVTRPTGSSAEITCDLPEV-----S-SFYIHWYLHQEGKAPQRL
LYYDSSN--SRV-VLESGISSGKYNSYEST-RRSLRLR------LQNLIENDSGVYYCAN
WD-----
>V4RF-AQIB01144236.1-igkv |(33225, 33525)|2.96431671213|(0.979,0.994,0.993)|1
----ARCDIQMTQSPSSLSASVGDRVTITCRASQGIN------KELSWYQQKPGKAPTLL
IY----A--AS---SLQTGVPSRFSGSGS--GTDFTLA------ISSLQPEDVATYYCLQ
DYTTP--
>V12RF-AQIB01144240.1-igkv |(12918, 13233)|2.70231512004|(0.984,0.850,0.944)|1
----TSGDIVMTQTPFSLPVNPGEPASISCRSSQSLSD-SDGYTYLYWYLQKPGQSPQLL
IY----L--GS---NRASGVPDRFSGSGS--GTDFTLK------ISRVEAEDVGVYYCMQ
GIQLP--
>V14RF-AQIB01144242.1-igkv |(18230, 18530)|2.89169918413|(0.989,0.929,0.988)|1
----ARCDIQMTQSPSSLSASVGDRVTITCQGSQSLS------NFLNWYQQKPGKIPKLL
IY----R--AS---SLQSGIPSRFSGSGS--GTDYTLT------ISSLQPEDFATYYCQQ
GYSYP--
>V17RF-AQIB01144243.1-igkv |(18759, 19059)|2.96608424741|(0.999,0.972,0.998)|1
----ARCDIQMTQSPSSLSASVGDRVTITCQASQGIT------NDLAWYQQKPGETPKLL
IY----E--AS---SLQSGIPSRFSGSGS--GTDFTLT------ISSLQPEDFATYYCQH
YYSTP--
>V18RF-AQIB01144243.1-igkv |(52384, 52684)|2.98374003277|(0.997,0.989,0.998)|1
----ARCDIQMTQSPSSLSASVGDRVTISCRASQNIY------SNLAWYQQKPGKTPKLL
IY----A--AS---SLQSGIPSRFSGSGS--GTDFTLT------ISSLQPEDYATYYCQH
HYGTP--
>V21RF-AQIB01144251.1-igkv |(6848, 7148)|2.91355466254|(0.982,0.976,0.958)|1
----ARCDIQMTQSPSSLSASVGDRVTITCHASQGIS------NWLAWYQQKPGKAPKLL
IY----Y--AS---NLETGVPSRFSGSRS--GTDFTVT------ISSLQPEDIATYYCQQ
YDNFP--
>V22RF-AQIB01144257.1-igkv |(11968, 12268)|2.78887311658|(0.951,0.988,0.877)|1
----ARCDIQMTQSPSSLSASVGDRVTITCRASQGIN------NYLSWYQQKPGKAPKPL
IY----Y--AS---SLETGVPSRFSGSGS--GPDYTLT------ISSLQPEDIATYYCQQ
YDNFP--
>V30RF-AQIB01144264.1-igkv |(45678, 45976)|2.69902544523|(0.972,0.820,0.998)|1
----SKGEIVLTQSPAFRSVTLKEKVTITCQASQSIG------SSLHWYQQKPDQSPKLL
IK----Y--AS---QSISGVPSRFSGSGS--GTDFTLT------INSLEAEDAATYYCQQ
SSSF---
>V31RF-AQIB01144264.1-igkv |(72133, 72421)|2.71035819824|(0.987,0.834,0.979)|1
--------IVLTQSPATLSLSPGETATLSCRASQSV------GSSLAWYQQKPGQVPRLL
IY----G--AS---SRATGIPDRFSGSGS--GTEFTLT------ISSLQPEDFAVYYCQK
YSSSP--
>V34RF-AQIB01144265.1-igkv |(9151, 9443)|2.8158427581|(0.976,0.885,0.988)|1
----SRGDIVMTQSPAFVSVTPGEKVTITCQASEGIS------NYLHWYQQKPDQAPKLL
IQ----Y--AS---QSISGVPSRFTGSGS--GTDFTFT------ISSLEVEDAATYYCQQ
GN-----
>V35RF-AQIB01144265.1-igkv |(25389, 25680)|2.86449304411|(0.963,0.959,0.944)|1
-------DIQMTQSPSSLSASVGDRVTITCQASQSFS------SSLAWYQQKPGKAPKLL
IY----A--AS---SLQSGVPSRFSGSKA--GTDFTLT------ISSLQPEDVATYYCQQ
YYSTP--
>V36RF-AQIB01144265.1-igkv |(40570, 40862)|2.95383291276|(0.996,0.993,0.968)|1
----AKCDIQMTQSPSSLSASVGDRVTITCRASQTIS------SYLAWYQQKPGKVPKLL
IY----A--AS---SLESGIPSRFSGSGS--GTEFTLT------ISSLQPEDFATYYCQQ
HN-----
>V37RF-AQIB01144265.1-igkv |(60992, 61284)|2.92383600705|(0.975,0.979,0.970)|1
----ARCDIQMTQSPSSLSASVGDRVTVTCRASQGIS------NYLSWYQQEPGKAPKLL
IY----A--AS---SLESGVPSRFSGSGS--GTEFTLT------ISSLQPEDFATYYCLQ
HN-----
>V38RF-AQIB01144265.1-igkv |(75665, 75964)|2.84011068476|(0.979,0.942,0.933)|1
----TTGEIVMTQSPATLSLSPGERATLSCRASQSVS------SYLAWYQQKPGQAPRLL
IY----G--AS---SRATGIPDRFSGSGS--GTEFTLT------ISSLEPEDVGVYYCQQ
YNNWN--
>V39RF-AQIB01144265.1-igkv |(84906, 85206)|2.9388103373|(0.998,1.000,0.950)|1
----ARCDIQMTQSPSSLSASVGDRVTITCRASQGIS------NYLNWYQQKPGKAPKLL
IY----S--AS---RLQSGVPSRFSGSGS--GTEFTLT------ISSLQPEDFATYYCEQ
FKNYL--
>V41RF-AQIB01144269.1-igkv |(40447, 40747)|2.93289226661|(0.990,0.983,0.963)|1
----ARCDIQLTQSPSSLSASVGDRVTITCRASQGIS------SYLAWYQQKPGKAPKLL
IY----D--AS---NLQSGVPSRFSGSGS--GTEFTLT------ISSLQPEDFATYYCQQ
RNSLP--
>V42RF-AQIB01144273.1-igkv |(1759, 2059)|2.98041612211|(0.999,0.988,0.994)|1
----ARCDIQMTQSPSSLSVSVGDRVTITCRASQGIS------NYLSWYQQKPGKAPKLL
IY----S--AS---SLESGVPSRFSGSGS--GTDYTLT------ISSLQPEDFAAYYCLQ
YQSIP--
>V44RF-AQIB01144273.1-igkv |(55407, 55707)|2.71997388929|(0.964,0.970,0.843)|1
----ARCDIQMTQSPSSLSASVGDRVTITCRASQGIS------NALAWYQQKPGKVPKLL
IY----A--AS---SLQSGLPSGFSGSGS--GTEFTLT------ISSLQPEDFATYYCQQ
GYSTP--
>V45RF-AQIB01144273.1-igkv |(67090, 67390)|2.99696400065|(1.000,1.000,0.997)|1
----ARCDIQMTQSPSSLSASVGDRVTITCRASQGIS------NNLAWYQQKPGKAPKLL
IY----D--AT---TLQSGVPSRFSGSGS--GTEFTLT------ISSLQPEDFATYYCQQ
YNSYP--
>V48RF-AQIB01144274.1-igkv |(49577, 49877)|2.94404987297|(0.990,0.968,0.988)|1
----ARCDIQMTQSPSSLSASVGDKVTITCHASQGIS------SWLAWYQQKPGKAPKLL
IY----K--AS---SLQSGVPSRFSGSGS--GTDFTLT------ISSLQPEDFATYYCQQ
ITSAP--
>V50RF-AQIB01144276.1-igkv |(25002, 25302)|2.85888400513|(0.952,0.950,0.957)|1
----ARRDIQMSQSPSSLSASVGDRVTITCHASQGIS------SWLAWYQQKPGKAPKLL
IY----K--AS---SLQSGVPSRFSGSGS--GTDFTLT------ISSLQPEDFATYYCLQ
YDSNP--
>V52RF-AQIB01144276.1-igkv |(40183, 40483)|2.96138667423|(1.000,1.000,0.966)|1
----ARCDIQMTQSPSSLSASVGDRVTITCQASQGIS------NYLAWYQQKPGKAPKLL
IY----Y--AS---TLQSGVPSRFSGSGS--GTEFTLT------ISSLQPEDFATYYCQQ
HNSNP--
>V53RF-AQIB01144276.1-igkv |(56521, 56821)|2.96461205453|(0.990,0.994,0.981)|1
----ARCDIQMTQSPSSLSASVGDRVTITCQASQGIS------NYLAWYQQKPGKAPKPL
IY----K--AS---TLESGVPSRFSGSGS--GTEFTLT------ISSLQPEDFATYYCQQ
RNSYP--
>V55RF-AQIB01144282.1-igkv |(46328, 46640)|2.69156133106|(0.884,0.963,0.870)|1
----CNGDIVLTQSPASLAVSPGQKATITCRASESVSL--FGINFIHWYQQKPGQPPKLL
IY----Q--AS---NKDTGVPARFSGSGS--GTDFTLT------INPVEADDAANYYCLQ
SKTSP--
>V56RF-AQIB01144282.1-igkv |(64268, 64559)|2.73003226731|(0.943,0.846,0.985)|1
--------IVLTQSPTSMAVSQGERVTISCTASSSIS-----TSYLHWYQQKPGFPPRLL
VY----T--TS---SLASGVPARFSGSGS--GTSYTLT------ISSMEAEDAANYYCQQ
GSSIP--
>V59RF-AQIB01146122.1-iglv |(12217, 12527)|2.71894585554|(0.919,0.852,0.981)|1
----SWAEVVFTQ-PHSVSGSPGQTVTISCTRSSG---SID-SSFVYWYQQRPGSAPTTV
IY----N--DN---RRPSGVPDRFSGSIDSSSNSASLT------ISGLKSEDEADYYCQS
DDSSG--
>V61RF-AQIB01146122.1-iglv |(69507, 69814)|2.88221336006|(0.986,0.923,0.989)|1
----SWAQSVLTQ-PPSVSGAPGQRVTISCTGSSS---NIG-GYNVHWYQQLPGTTPKLL
IY----G--NN---QRPSGVSDRFSGSKS--GTSASLT------ITGLQSEDEADYYCQS
YDSSLS-
>V64RF-AQIB01146122.1-iglv |(97013, 97322)|2.90021336006|(0.992,0.929,0.995)|1
----CWAQSVLTQ-PPSASGAPGQSVTISCSGSSS---NIG-SNSVYWYQQFPGTAPKLL
IY----Y--SN---QRPSGVPDRFSGSKS--GTSASLT------ISGLQSEDEADYYCAA
WDDSLSG
>V68RF-AQIB01146122.1-iglv |(131665, 131974)|2.8767169434|(0.984,0.929,0.976)|1
----SWAQSVLTQ-PPSASGAPGQSVTISCSGSSS---NIG-SNYVSWYQQLSGKAPKLL
IY----K--NS---QRPSGVPDRFSGSKS--GTSASLT------ISGLRSEDEADYYCAA
WDDSLNG
>V70RF-AQIB01146122.1-iglv |(149998, 150308)|2.70815186287|(0.955,0.882,0.903)|1
----SLSQPVLTQ-PASLSASPGASARLSCTLSSG---INVGSYSIYWYQQKPGSPPRYL
LYYYSDS--SK---GQGSGVPSRFSGSKDASANAGLLL------ISGLQSEDEADYYCAI
-------
>V71RF-AQIB01146122.1-iglv |(159131, 159440)|2.90392430843|(0.976,0.963,0.966)|1
----SWAQSVLTQ-PPSVSGAPGQRVTISCTGSSS---NIG-GYYVQWYQQLSGTAPKLL
IY----G--NN---QRPSGVSDRFSGSKS--GTSASLT------ITGLQSEDEADYYCET
WDNSLNG
>V72RF-AQIB01146122.1-iglv |(164963, 165270)|2.65393301985|(0.846,0.920,0.962)|1
----SWAQSVLTQ-PPSVSGAPGQRVTISCTGSSS---NIG-GYDVHWYQQLPGTTPKLL
IY----D--NN---KRPSGVSDRFSGSKS--GTSASLT------ITGLQTEDEADYFCQS
YDSSLG-
>V73RF-AQIB01146122.1-iglv |(187790, 188100)|2.68976851209|(0.976,0.901,0.875)|1
----SLSQPVLTQ-PASLSASPGASASLTCTFSGG---INVAGYYIYWYQQKPGSPPRYL
LWYKSDS--DK---HQGSGVPSRFSGSKDASANTGILR------ISGLQSEDEADYYCAI
-------
>V74RF-AQIB01146123.1-iglv |(2181, 2490)|2.61890053876|(0.949,0.845,0.884)|1
----SWAQSVLTQ-PRSASEATRKSITISCSGSSS---NIG-SNYVSWYQQLPGTAPKLL
IY----Y--ND---WRASGVSDRFSGSKS--GTSASLA------ISGLQTEDEADYYCAA
WDDSLSG
>V76RF-AQIB01146133.1-iglv |(25439, 25742)|2.84780593785|(0.958,0.974,0.922)|1
----SWAQSALTQ-SPSVSGSPGQSVTISCTGTSS---DVGGYNYVSWYQQHPGKAPKLM
IY----E--VS---KRPSGVSDRFSGSKS--GNTASLT------ISGLQAEDEADYYCCS
YTTS---
>V80RF-AQIB01146136.1-iglv |(1665, 1968)|2.87987291563|(0.984,0.929,0.979)|1
----SWAQSAPTQ-PRSVSGSPGQSVTISCTGTSS---DIGGYNYVSWYQQHPGTAPKLM
IY----G--VS---NRPSGVSDRFSGSKS--GNTASLT------ISGLQAEDEADYYCCS
YTTS---
>V81RF-AQIB01146137.1-iglv |(9886, 10183)|2.71563800193|(0.933,0.865,0.936)|1
----SVASYELTQ-PPSVSVSPGQTARITCSG------DVLKENYADWYQQKPGQAPVLL
IY----E--DS---KRPSGIPERFSGSTS--GDTTTLT------ISSTLSEDGADYYCFS
GDENN--
>V83RF-AQIB01146137.1-iglv |(25864, 26167)|2.69377120486|(0.943,0.847,0.940)|1
----SVVSSELTQ-DPAVSVALGQTVRITCQG------DSLRSSYASWYQQKPGQAPVLV
VY----G--NN---NRPSGIPERFSGSSS--GNTASLT------ITGAQVEDEADYYCNS
WDSSGNH
>V84RF-AQIB01146138.1-iglv |(15714, 16017)|2.84245111307|(0.928,0.948,0.978)|1
----SWAQAALTQ-PPSVSKSLGQSVTISCTGTSS---DIAAYNDVSWYQQHPGTAPRLL
IY----S--VS---NRPSGVSDCFSGSKS--GNTASLT------ISGLQAEDEADYYCCS
YRSG---
>V86RF-AQIB01146140.1-iglv |(2757, 3067)|2.65425565049|(0.982,0.812,0.970)|1
----SWAQAALTQ-PHSVSGSPGQSVTISCTGTSS---DIGGYNRVSWYQQHPGKAPKLM
IY----E--VS---NRPSGVSDRFSGSKS--GNTASLT------ISGLQAEDEADYYCSS
YASSSN-
>V87RF-AQIB01146140.1-iglv |(26014, 26324)|2.88490330517|(0.993,0.954,0.951)|1
----SWAQAALTQ-PPSVSGSPGQSVTISCTGTSS---DVGGYNYVSWYQQHPGKAPKLM
IY----E--VN---KRPSGVSDRFSGSKS--GNTASLT------ISGLQAEDEADYYCSS
YAGSNT-
>V90RF-AQIB01146141.1-iglv |(13491, 13794)|2.829975705|(0.950,0.924,0.959)|1
----SWAQAAPTQ-SPSVSGSAGQSVTISCTGTSS---DIGGYNRVSWYQQHPGKAPKLM
IY----E--VS---KRPSGVSDRFSGSKS--GNTASLT------ISGLQAEDEADYYCSS
YAGS---
>V94RF-AQIB01153481.1-ighv |(29869, 30184)|2.95570083945|(0.992,0.974,0.991)|1
----VQCEVQLVE-SGGGLIQPGGSLRLSCAASGFTF-S---DYAMSWVRQASGKGLEWV
GYIRSKSNNYAT--EYAASVKGRFTISRDDSKNTLYLQ------MSGLKTEDTAVYYCTI
-------
>V95RF-AQIB01153482.1-ighv |(4668, 4983)|2.97528017622|(0.994,1.000,0.982)|1
----VQCEVQLVE-SGGGLVQPGGSLRLSCAASGFTF-S---DHYMQWVRQAPGKGLEWV
GFIRSKAYGGTA--EYAASVKGRFTISRDDSKSITSLQ------MNSLKTEDTAVYYCTR
-------
>V96RF-AQIB01153482.1-ighv |(18678, 18987)|2.98793200206|(0.997,0.998,0.993)|1
----VQCEVQLVE-SGGGLVQPGGSLKLSCAASGFTF-G---DYAMSWVRQAPGKGLEWV
SSISNT--GKTT--YYADSVKGRFTISRDNAKNSLSLQ------MNSLRAEDTAVYYCAR
-------
>V101RF-AQIB01153486.1-ighv |(413, 728)|2.92740787807|(0.957,0.985,0.994)|1
----VQCEVQLVE-SGGGLVQPGGSLRLSCAASGFTF-S---DYAMHWVRQAPGKGPEWV
GFIRSKAYGGTA--EYAASVKGRFTISRDDSKNTAYLQ------MNSLKTEDTAVYYCTI
-------
>V106RF-AQIB01153492.1-ighv |(6792, 7104)|2.862833323|(0.992,0.994,0.906)|1
----VLSQVQLQE-SGPGLVKPSETLSLTCAVSGGSI-S---SSYWSWIRQSPGKGLEWI
GDIYGS-SGGST--SYNPSLKSRVTMSVDTSKNQFSLK------LSSVTAADTAVYYCAR
-------
>V108RF-AQIB01153501.1-ighv |(4567, 4876)|2.93735831305|(0.998,0.965,0.980)|1
----VQCEVQLVE-SGGGLVQPGASLRLSCAASGFTF-G---DYAMSWVRQAPGKGLEWV
SYISSA-S-STI--YYADSVKGRFTISRDNAKNSLYLQ------MNSLKTEDTAVYYCTR
-------
>V114RF-AQIB01153507.1-ighv |(24714, 25023)|2.99071202074|(0.993,0.999,0.999)|1
----VQCEVQLVE-SGGGLVQPGGSLRLSCAASGFTF-S---SYWMHWVRQAPGKGLEWV
SLINSD--GGST--RYADSVKGRFTISSENAKNSLYLQ------MNSLRAEDTAVYYCAR
-------
>V115RF-AQIB01153507.1-ighv |(32453, 32768)|2.899828921|(0.991,0.936,0.985)|1
----VQCEVQLVQ-SGGGLVQPGGSLRLSCAASGFTF-S---EYAMAWVRQASGKGLEWV
GRIRSKSNNYGT--AYAASVKGSFTISRDDSKNTLYLQ------MSSLKTEDTAVYYCTR
-------
>V117RF-AQIB01153509.1-ighv |(6082, 6394)|2.95223355494|(0.992,0.971,0.991)|1
----VQCEVQLVE-SGAGLVQPGGSLRLSCAASGFTF-S---DYYMDWVRQAPGKGLEWV
SRISSG-SGSST--YYPDSVKGRFTISRDNSKNTLYLQ------MNSLRAEDTAVYYCAR
-------
>V119RF-AQIB01153509.1-ighv |(29997, 30306)|2.96287652911|(0.995,0.990,0.979)|1
----VQCEVQLVE-SGGGLVQPGGSLRLSCAASGFTF-G---DYDMSWVRQAPGKGLEWV
SFISYT-G-KTT--YYADSVKGRFTISRDNAKNSLSLQ------MNSLRAEDTAVYYCTR
-------
>V122RF-AQIB01153511.1-ighv |(7980, 8295)|2.89444268494|(0.955,0.979,0.963)|1
----VQCEVQLVE-SGRGLVQPGGSLRLSCAVSGFTF-S---DHYMSWVREAPGKGLEWV
GFMRNKANGGRT--EYAASVKGRFTISRDDSKSIASLQ------MSSLKTEDTAVYYCAR
-------
>V123RF-AQIB01153511.1-ighv |(11094, 11404)|2.96848011776|(0.985,0.996,0.988)|1
----VQCEVQLVE-SGGGLVQPGGSLRLSCVASGFTF-S---DHYMDWVRQAPGKGLEWV
SSISTGSG-STT--LYPDSVKGRFTISRDNAKNTLYLQ------MNSLRADDTAVYYCA-
-------
>V124RF-AQIB01153511.1-ighv |(40798, 41107)|2.97273242436|(0.983,0.997,0.994)|1
----VQCEVQLVE-SGGGLAKPGGSLRLSCAASGFTF-S---SYGMHWVRQAPGKGLEWI
SAINSG--GSNT--WYTDSVKGRFTISRDNSKNTLSLQ------MNSLRAEDTAVYYCAK
-------
>V126RF-AQIB01153517.1-ighv |(601, 913)|2.84463929724|(0.988,0.922,0.956)|1
----VLSQVQLQQ-WGGGLVKPSETLSLTCAVYGGSI-S--GYYYWSWIRQPPGKGLEWI
GNIDGN-S-GST--NYNPSLKSRVTISKDTSKNQFSLK------LSSVTAADTAVYYCAR
-------
>V128RF-AQIB01153537.1-ighv |(1707, 2018)|2.86567621346|(0.990,0.996,0.907)|1
----VQCEVQLVE-SGGGVVQPGGSLRLSCAASGFTF-D---DYGMHWVRQAPGKGLEWV
SDISWD--GDST--YYADSVKGRFTISRDDAKNSLYLQ------MDSLRAEDTALYYCAK
D------
>V129RF-AQIB01153538.1-ighv |(4311, 4620)|2.92965347361|(0.989,0.989,0.956)|1
----AQSQVQLVQ-SGAEVKKPGASVKLSCKASGYTF-T---SYNINWVRQAPGQVLEWM
GWINPS-N-GNT--GYAQKFQGRVTMTRDTSTSTAYME------LSSLISEDTAVYYCAR
-------
>V134RF-AQIB01153543.1-ighv |(7057, 7368)|2.90876413585|(0.996,0.987,0.939)|1
----VQCEVQLVE-SGGGVVQPGGSLRLSCAASGFTF-D---DYAMGWVRQAPGKGLEWV
SGISWNS--GST--GYADSVKGRFTISRDNAKNSLYLQ------MNRLRAEDTALYYCAK
D------
>V136RF-AQIB01153553.1-ighv |(7961, 8270)|2.87213816983|(0.987,0.913,0.994)|1
----VQGEVQLVE-SGGGLAKPGGSLRLSCSASGFTF-S---DYYMHWVRQASGKGLEWV
SRINTG--GGST--WYADSVKGRFTISRENAKNTLYLQ------MDSLRAEDTAVYYCAR
-------
>V140RF-AQIB01153555.1-ighv |(23903, 24218)|2.89135311852|(0.935,0.995,0.986)|1
----VQCEVQLVE-SGGGLVQPGGSLRLSCAASGFTF-S---DHYMDWVRQAPGKGLKWV
GRIRNKANSYTT--EYAASVKGRFTISRDDSKNTLYLQ------MSSLKTEDTAVYYCTR
-------
>V143RF-AQIB01153557.1-ighv |(2988, 3297)|2.98783600705|(0.993,0.997,0.998)|1
----VQCEVQLVE-SGGGLVQPGGSLRLSCAASGFTF-S---DYWMYWVRQAPGKGLEWV
SRISGS--SSST--YYPDSVKGRFTISRDNAKNTLYLQ------MDSLRAEDTAVYYCAR
-------
>V144RF-AQIB01153557.1-ighv |(15135, 15441)|2.86024535942|(0.980,0.917,0.979)|1
----VQCEVQLVE-SGGGLVQPGGTLRLSCAASGFTF-G---NSDLIWIRQAPGKGLEWV
SYISS--G-GST--YYSDSVKGRFTISRENAKNTLYLQ------MSSLRVEDTAVYYCVR
-------
>V145RF-AQIB01153558.1-ighv |(4802, 5117)|2.91847399961|(0.997,0.985,0.947)|1
----VQCEVQLVE-SGGGLVQPGGSLRLSCAASGFTF-S---NSWMSWVRQAPGKGLEWV
ARIKSKADGGTA--EYAASVKGRFTISRDDSKNTLYLQ------MNSLKTEDTAVYYCTI
-------
>V149RF-AQIB01153566.1-ighv |(30566, 30881)|2.94473782422|(0.965,0.993,0.993)|1
----VQCEVQLVE-SGGGLVQPGGTLRLSCAASGFTF-S---NYWMDWVRQAPGKGLEWV
GFIKNKADGGTA--EYAASVKGRFTISRDDSKNTLYLQ------MNSLKTEDTAVYYCTR
-------
>V150RF-AQIB01156901.1-igkv |(3348, 3648)|2.96194800078|(0.989,0.987,0.986)|1
----AKCDIQMTQSPSSLSASVGDKVTITCQASQSIS------SWLAWYQQKPGKAPKLL
IY----K--AS---SLESGVPSRFSGSGS--GTDFTLT------ISSLQPEDFATYYCQQ
HNSAP--
>V154RF-AQIB01162311.1-trbv |(11768, 12065)|2.61352346245|(0.896,0.852,0.875)|1
-----SLDTAVSQTPKYLVTQMGKKVSLKCEQNLG-------HDTMYWYKQDSKKLLKIM
FSYNNK---ELT--INETV-STRFSPESPD-KAHLILH------IKSLELGDSAVYFCAS
SQ-----
>V158RF-AQIB01162312.1-trbv |(22989, 23286)|2.43534019656|(0.916,0.807,0.806)|1
-----PTDTGVTQTPKHLVMGMTNKKSLKCEQHLG-------HNAMYWYKQKAKKPPELM
FVYNYE---KLS--INESV-PSRFSPECSK-SSLLYLH------LRALQPEDSALYLCAS
SQ-----
>V160RF-AQIB01162312.1-trbv |(41443, 41740)|2.79513070699|(0.942,0.908,0.950)|1
-----PANADVTQSPKFQILKTGQNMTLKCAQDMN-------HNSMYWYRQDPGMGLRLI
HYSATED--T----TDTGEVPDGYSVSRLN-KKEFLLR------LESAAPSQTSVYFCAS
SE-----
>V161RF-AQIB01162312.1-trbv |(55583, 55896)|2.67052655653|(0.922,0.878,0.884)|1
-----SLDTAVSQTPKYLVTQTGKNESLKCEQNLG-------HNAMYWYKQDSKKLLKIM
FIYSNK---EPV--LNETV-PNRFSPKSPD-KAHLNLY------ITSVELGDSAVYFCAS
SQDTALQ
>V162RF-AQIB01162312.1-trbv |(59013, 59310)|2.54321239029|(0.833,0.868,0.848)|1
-----PMETGVTQTPRHLVMGMTNKKSLKCEQHLG-------HNAMYWYKQKAKKPPELM
FIYNFK---ERA--ENNSV-PSRFSPECPD-SSLLYLH------LRALQPEDSALYLCAS
SQ-----
>V163RF-AQIB01162312.1-trbv |(70730, 71027)|2.68739593635|(0.866,0.947,0.907)|1
-----PVNAGVTQTPKFQILKTGQNMTLKCAQDMN-------HDRMYWYRQDTGMGLRLI
HYSVGEG--N----TEKGEVPSGYNASRLN-KKDFLLR------LELAAPSQTSIYFCAS
SE-----
>V165RF-AQIB01162313.1-trbv |(10114, 10411)|2.64013724966|(0.913,0.855,0.888)|1
-----HTGAGVSQSPSNKVTEKG-NVALRCDPISG-------HAVLYWYRQNLGQGLEFL
IYFQGT---SAV--DDSGLRSDRFSATRPE-GSVSTLK------IQRTEQGDSATYFCAS
SL-----
>V172RF-AQIB01162317.1-trbv |(23070, 23367)|2.80247384997|(0.972,0.961,0.894)|1
-----PVNAGVTQTPKFQVLKTGQSMTLQCAQDMN-------HDCMYWYRQDPGMGLRLI
HYSFGKG--S----TDKGEVPDGYNVTRSS-TEDFTLR------LESAAPSQTSVYFCAS
SY-----
>V174RF-AQIB01162317.1-trbv |(35256, 35552)|2.46987611071|(0.908,0.819,0.811)|1
-----PVQAGVTQSPTHLIKTRGQQVTLRCSPISG-------HSSVYWYQQALGQGLQFI
LSYDEEE---ER--DR-GTFPHRFSGHQFP-NYSSELN------VNASEVGDSALYLCAS
SL-----
>V175RF-AQIB01162317.1-trbv |(46598, 46898)|2.70294958692|(0.931,0.880,0.905)|1
-----HTGAGVSQSPSYKVTKRGQDVALRCDPISG-------HVALYWYRRTLGQGPELL
TYFQND---AQP--DKSGLPSDRFSAERPE-GSVSTLK------IQRTQQGDSAVYLCAS
SL-----
>V176RF-AQIB01162318.1-trbv |(2955, 3251)|2.7801261813|(0.949,0.976,0.878)|1
-------NAGVTQTPKFQVLKTGQSMTVQCAQDMN-------HDYMFWYRQDPGMGLRLI
HYSGAAG--T----TDKGEVPSGYNVSRLN-TEDFPLR------LESAAPSQTSVYFCAS
SYST---
>V184RF-AQIB01162320.1-trbv |(3376, 3672)|2.52515752904|(0.947,0.870,0.807)|1
-----PVDTGVTQSPTHLIKMRGQQVTLRCSPISG-------HSSVYWYQQALGQGPQFI
FQYYEKE---ER--GR-GNFPDRFSGHQFP-NYSSELN------VSALLLGDSALYLCAS
SL-----
>V185RF-AQIB01162320.1-trbv |(10674, 10965)|2.56724444916|(0.914,0.965,0.774)|1
-------NAGVTQTPKFQVLKTGQSMIVQCAQNMN-------HDYMFWYRQDPGMGLRLI
YYSVTAG--I----TTKGEVPNGYNVSRRN-TEDFLLR------LESAALSQTSVYFCAS
SY-----
>V186RF-AQIB01162320.1-trbv |(14920, 15220)|2.74519283136|(0.915,0.931,0.901)|1
-----HTGAGVSQSPRYKVIKKGQDVALRCDPISG-------HAALYWYQQALGQGPEFL
TYFNYK---DQP--DKSGLPNNRFSAERPE-GSFSTLT------IQRTEQQDSAVYLCAS
SL-----
>V189RF-AQIB01162320.1-trbv |(46876, 47183)|2.6603881665|(0.884,0.896,0.881)|1
-----HMDARITQSPRHKITETGTPVTLRCHQTEN-------HRYMYWYRQDLGHGLRLI
HYSYGVE--D----TDKVEVSDGYSVSRSK-TEDFLLT------LESATRSQTSVYLCAS
SEPTV--
>V197RF-AQIB01162321.1-trbv |(2362, 2659)|2.66944634762|(0.909,0.951,0.837)|1
-----TVDGGITQSPKYLFRKEGQNVTLSCEQNLN-------HDAMYWYRQDPGQGLRLI
YYSQTVN--D----IQKGDTAEGYSVSRER-KQSFPLT------VTSAQRNPTAFYLCAS
SI-----
>V198RF-AQIB01162321.1-trbv |(20388, 20688)|2.45620152011|(0.911,0.739,0.918)|1
-----STDTKVTQRPRLLVKANEQKAKMDCVPVKG-------HSYVYWYRKKLDEELKFL
IYFQNEE---II--QKAEIINERFSAQCPQ-NSPCTLE------IQSTESGDAALYFCAS
SK-----
>V199RF-AQIB01162321.1-trbv |(29352, 29657)|2.48168786831|(0.878,0.807,0.827)|1
-----SFHAEVTQTPGYLVKGKGQKTKMDCTPEKG-------HTFVYWYQQNQNKEFTFL
ISFQNEQ---VL--QETELHKKRFSSQCPK-NPPCSLE------IPSSEPGDTALYLCAS
SQST---
>V200RF-AQIB01162321.1-trbv |(41537, 41835)|2.61495202911|(0.878,0.911,0.837)|1
-----SMDADVTQTPRNKIAKTGKRIMLECSQTKS-------HDRMYWYRQDPGLGLRLI
YYSFDVK--D----INKGEISDGYNVSRQE-QAKFSLS------LESATPNQTALYFCAT
SD-----
>V201RF-AQIB01162321.1-trbv |(50021, 50318)|2.64081063759|(0.879,0.914,0.855)|1
-----LMEADIYQNPRHCVIGTGKKITLECSQTMG-------HDKMYWYQQDPGMELHLI
HYSYGVN--S----TERGDFSSESTVSRIR-IEHFPLT------LESASPSHTSQYLCAS
SE-----
>V202RF-AQIB01162321.1-trbv |(81250, 81547)|2.53064870298|(0.809,0.925,0.859)|1
-----PLEAQVTQNPRYLITVTGKKLTVTCSQNMN-------HEYMSWYRQDPGLGLRQI
YYSINVE--M----VDKGDIPEGYIVSRKE-KRNFLLI------LESPSPSQTSLYFCAS
SL-----
>V203RF-AQIB01162321.1-trbv |(86583, 86890)|2.54195665333|(0.832,0.867,0.849)|1
-----LVDVKVTQSSRYLIKRTGEKVFLECVQDMD-------HERMFWYRQDPGLGLRLI
YFSYDVK--L----NEKGDIPEGYNVSREK-KERFSLI------LGFASTNQTSMYLCAS
SLSTA--
>V204RF-AQIB01162321.1-trbv |(106451, 106754)|2.53724504898|(0.873,0.781,0.929)|1
----SVFSAVVSQKPSRDVCQRGTSVTIQCQVDSQ-------VTMMFWYRQQPGQSMTLI
ATANQGS--EAT--YESGFVIDKFPISRPN-LTFSTLT------VSNTSPEDSSIYLCSV
E------
>V206RF-AQIB01128636.1-trav |(12150, 12438)|2.40203069896|(0.801,0.747,0.940)|-1
----LSGELKVGQNPLFLSTQEGKNDTIYCNYSTA-------SDRLYWYRQDPGKSLESL
FVLLSNG--AV---KQEGRFMASLDTK----ARLSTLH------ITAALQDLSATYFCAV
-------
>V210RF-AQIB01128637.1-trav |(79553, 79853)|2.36798884907|(0.866,0.840,0.733)|-1
----SGMAQTVTQSQPEMSVREAETVTLSCTYDTS-----ESYYYLFWYKQPPSRQMTLI
IRQEAYK--QQN--ATENRFSVNFQKA----AKSFSLK------ISDSQLGDAARYFCAY
R------
>V217RF-AQIB01128642.1-trav |(7440, 7727)|2.35637660629|(0.909,0.842,0.736)|-1
----LSGEDQVTQSPEALSLQEGESSSLNCSYTVS-----G-LRGLFWYRQDPGKGPEFL
FSLYSAG--EE---KEKERLKATLTKK------ESFLH------ITGPKPEDSATYLCAV
Q------
>V219RF-AQIB01128643.1-trav |(8686, 8977)|2.61477635195|(0.841,0.906,0.897)|-1
----RTNGDSVTQTEGPVTLPERAALTLNCTYQTS-----YS-AFIFWYVQYPKKEPELL
LKSS-E---NQE--TNSRGFQASHVKS----DSSFHLE------KPSVQLSDSAVYYCVL
R------
>V220RF-AQIB01128643.1-trav |(11902, 12205)|2.36080640148|(0.820,0.801,0.757)|-1
----SSMAQKVTQAQTEISVVEKEDVTLDCVYETR-----ETTYYLFWYKQPPSGELVFL
IRQNSFN--EQN--EINGRYSSNFQKS----TSSFNLT------ITASQVMDSAVYFCAL
NE-----
>V223RF-AQIB01128644.1-trav |(158071, 158361)|2.60790488653|(0.849,0.857,0.925)|-1
----MSRGDDVEQS-LFLSVREGDISVINCTYTDS-----S-STYLYWYKQEPGAGLQLL
IYILSNT--DL---KQDQRLTVLLNKK----DKHLSLR------IADTQTGDSAIYFCAE
S------
>V225RF-AQIB01128644.1-trav |(203408, 203702)|2.80520848353|(0.973,0.993,0.877)|-1
----GINGDSVVQTEGQVLLSEGNSLIVNCSYEST-----QY-PSLFWYVQYPGEGPQLL
LKAMKD---NDK--ESNKGFEATYRKE----TTSFHLE------KDSVQESDSAVYFCAL
S------
>V226RF-AQIB01128644.1-trav |(216592, 216885)|2.37520871374|(0.762,0.804,0.956)|-1
----GSGKNQVEQSPQSLIILEGKNCTLQCNYTVS-----P-FSNLRWYKQDTGKGLISL
TIMTFSD--NT---KSNGRYTATLDAD----TKQSSLY------ITAAQLSDSASYICVV
S------
>V227RF-AQIB01128644.1-trav |(232171, 232464)|2.7229167015|(0.900,0.891,0.938)|-1
---VWGQQKEVEQNPGPLSVPEGATASLNCTYSNS-----A-FQYFMWYRQYSRKGPQLL
IYIYSSG--NK----EDGRFTAQVDKS----SKYISLF------IRDSQPSDSATYFCAM
S------
>V229RF-AQIB01128644.1-trav |(243150, 243447)|2.39516822136|(0.917,0.851,0.750)|-1
----TARAQSVTQPDIHITVSEGASLELRCNYSYG-----AT-PSLFWYVQSPGQGLQLL
LKYFSGD--TLV--QGIKGFEAEFKRS----QYSFNLR------KPSVHWSDAAEYFCAA
G------
>V230RF-AQIB01128644.1-trav |(257060, 257353)|2.47997474155|(0.934,0.895,0.765)|-1
----VSRGESVGLHLPTVSVQEGDNSVINCTYSDS-----A-SDYFLWYKQESGKGPQSI
IDIRSNM--AK---RQGQRLTVLLNKT----MKHLSLQ------IAATEPGDSAVYFCAE
N------
>V231RF-AQIB01128644.1-trav |(262905, 263206)|2.55527703663|(0.945,0.816,0.877)|-1
----SGIAQKITQTQPAMFVQEKEAVTLDCTYDTS-----DQSYGLFWYKQPSSGEMIFL
IRQESYD--KQN--ATEGRYSLNFQKA----RKSVNLV------ISASQVEDSAMYFCAM
R------
>V232RF-AQIB01128644.1-trav |(280831, 281125)|2.67265267434|(0.929,0.881,0.881)|-1
----RTRGDSVTQMEGPVTLSERAFLTINCTYTAT-----GY-PSLFWYVQYPGEGPQLL
LKAVKT---DEK--GSNKGFEATYRKE----TTSFHLK------KDSVQESDSAVYFCAL
S------
>V233RF-AQIB01128644.1-trav |(305369, 305662)|2.72495715951|(0.910,0.883,0.938)|-1
---VWSQQKEVEQNPGPLSVPEGATASLNCTYSNS-----A-FQYFMWYRQYSRKGPQLL
IYIYSSG--NK----EDGRFTAQVDKS----SKYISLF------IRDSQPSDSATYFCAM
S------
>V236RF-AQIB01128644.1-trav |(340098, 340385)|2.79360007999|(0.928,0.938,0.928)|-1
-----VNSQQGEEDPQTLSIQEGENATMNCSYKT------S-INNLQWYRQDSGRSLVQL
TLIRSNE--RQ---KNSGRLRVTLDTS----KKSSSLL------ITASRAADTASYFCAT
D------
>V238RF-AQIB01144282.1-igkv |(55648, 55948)|2.6925299527|(0.890,0.871,0.945)|-1
----TTGQVILTQSPATLSLSPGERATLSCRASQSV------SSYLAWYQQKPGQAPRLL
IY----S--AS---SRATGIPDRFSGSGS--GTEFTLT------ISSLEPEDVGVYHCYQ
YYSGY--
>V245RF-AQIB01158235.1-ighv |(4748, 5060)|2.97483600705|(0.992,0.987,0.996)|-1
----VQCEVQLVE-SGGGLVQPGGSLRLSCVASGFTF-S---DHYMHWVRQALGKGLEWV
SRISSG-SGSST--YYADSVKGRFTISRDNAKNTLYLQ------MNSLRAEDTAVYYCAR
-------
>V2RF-AACZ03050973.1-trgv |(700, 1013)|2.32976099242|(0.951,0.824,0.757)|1
----SQKSSNLEGRMKSVTRPTGSSAEITCDLIVI-----N-AVYIHWYLHQEGKSPQRL
LYYDVSN--SRD-VLESGLSLGKYYTHTPR-RWSWILR------LQNLIENDSGVYYCAT
WD-----
>V4RF-AACZ03053974.1-trbv |(14398, 14698)|2.61441477068|(0.937,0.913,0.820)|1
-----LTEPEVTQTPSHQVTQMGQEVILRCVPISN-------HLYFYWYRQILGQKVEFL
VSFYNN---KIS--EKSEIFDDQFSVERPD-GSNFTLK------IRSTKLEDSAMYFCAS
SE-----
>V6RF-AACZ03053974.1-trbv |(34490, 34786)|2.44775110564|(0.924,0.742,0.907)|1
-----PVEAGVTQTPRYLIKARGQQVTLSCSPISG-------HRSVSWYQQTPGQGLQFL
FEYFSE---TQR--NKGNF-PGRFSGRQFS-NSRSEMN------VSTLELGDSALYLCAS
SL-----
>V7RF-AACZ03053974.1-trbv |(41734, 42031)|2.89824228261|(0.987,0.987,0.935)|1
-----PVNAGVTQTPKFQVLKTGQSMTLQCAQDMN-------HNSMYWYRQDPGMGLRLI
YYSVGEG--T----TDKGEVPDGYNVSRLN-KREFSLR------LESAAPSQTSVYFCAS
SE-----
>V9RF-AACZ03053975.1-trbv |(1894, 2207)|2.52770427131|(0.956,0.896,0.792)|1
-----PMEMGVTQTPRHLVMGMTNKKSLKCEQHLG-------HNAMYWYKQSAKKPLELM
FVYNFK---EQT--ENNSV-PSRFSPECPN-SSHLFLH------LHALQPEDSALYLCAS
SQDTALQ
>V10RF-AACZ03053976.1-trbv |(3094, 3391)|2.71595581133|(0.879,0.978,0.899)|1
-----PVNAGVTQSPKFRVLKTGQSMTLQCAQDMN-------HNYMYWYQQDPGMGLRLI
HYSAGEG--T----TAKGEVPDGYNVSRLN-TQNFLLR------LESAAPSQTSVYFCAT
SE-----
>V11RF-AACZ03053977.1-trbv |(2980, 3277)|2.6397050841|(0.916,0.945,0.819)|1
-----PLDTAVSQTPKYLVTQMGKKESLKCEQNLG-------HNAMYWYKQDSKKFLKTM
FIYSNK---EPI--LNETV-PNRFSPDSPD-KAHLNLH------INSLELGDSAVYFCAS
SQ-----
>V12RF-AACZ03053977.1-trbv |(6432, 6729)|2.57580362899|(0.961,0.851,0.855)|1
-----PMEMGVTQTPRHLVMGMTNKKSLKCEQHLG-------HNAMYWYKQSAKKPLELM
FVYSLE---ERV--ENNSV-PSRFSPECPN-SSHLFLH------LHTLQPEDSALYLCAS
SQ-----
>V13RF-AACZ03053977.1-trbv |(14911, 15208)|2.63231151929|(0.957,0.869,0.868)|1
-----PVNAGVTQTPKFRVLKTGQSMSLLCAQDMN-------HEYMYWYRQDPGMGLRLI
HYSVGEG--T----TAEGEVPDGYNVSRLK-KQNFLLG------LESAAPSQTSVYFCAS
SY-----
>V14RF-AACZ03053979.1-trbv |(398, 698)|2.78712485441|(0.961,0.964,0.885)|1
-----HTGAGVSQSPSNKVTEKGKDVELRCDPISG-------HTALYWYRQSLGQGLEFL
IYFQGN---SAP--DKSGLPSDRFSAERTG-GSVSTLT------IQRTQQEDSAVYLCAS
SL-----
>V15RF-AACZ03053981.1-trbv |(4476, 4773)|2.45966963849|(0.904,0.756,0.885)|1
-----PVIAGITQAPTSQILAAGRSMTLRCTQDMR-------HNAMYWYRQDLGLGLRLI
HYSNTAG--T----TGKGEVPDGYSVSRAN-TDDFPLT------LASAVPSQTSVYFCAS
SD-----
>V16RF-AACZ03053981.1-trbv |(8075, 8375)|2.66629387475|(0.954,0.964,0.819)|1
-----HTGAGVSQTPSNKVTEKGKDVELRCDPISG-------HAALYWYRQSLGQGPEFL
IYFQGT---GAA--DDSGLPNDRFFAVRPE-GSVSTLK------IQRTEQGDSAVYLCAS
SL-----
>V18RF-AACZ03053981.1-trbv |(15649, 15945)|2.68176090883|(0.926,0.836,0.955)|1
-----PVDSGVTQTPKHLITATGQQVTLRCSPRSG-------DLSVYWYQQSLDQGLQFL
IQYYNGE---ES--AK-GNILERFSAQQFP-DLHSELN------LSSLELGDSALYFCAS
SV-----
>V20RF-AACZ03053981.1-trbv |(31375, 31675)|2.60006971828|(0.914,0.879,0.836)|1
-----LSEAEVAQSPRYKITEKSQAVAFWCDPISG-------HATLYWYRQILGQGPELL
VQFQDES---VV--DDSQLPKDRFSAERLK-GVDSILK------IQPAELGDSAMYLCAS
SL-----
>V22RF-AACZ03053983.1-trbv |(4545, 4845)|2.50821496906|(0.929,0.911,0.768)|1
-----LTEAGVAQSPRYKIIEKRQSVAFWCNPISG-------HATLYWYQQILGQGPKLL
IQFQNNG---VV--DDSQLPKDRFSAERLK-GVDSTLK------IQPAKLEDSAMYLCAS
SL-----
>V23RF-AACZ03053983.1-trbv |(21546, 21843)|2.44991450479|(0.958,0.982,0.718)|1
-----PVNAGVTQTPKFQVLKTGQSMTLQCAQDMN-------HKYMYWYRQDPGMGLRLI
HYSVGAG--I----TDKGEVPNGYNVSRSN-TEDFPLS------LVSAAPSQTSVYFCAS
SY-----
>V24RF-AACZ03053983.1-trbv |(25762, 26062)|2.64277338538|(0.956,0.941,0.819)|1
-----HTGAGVSQSPRYKVAKRGRDVALRCDSISG-------HVTLYWYRQTLGQGSEVL
TYFRSD---AQR--DKSGRPSGRFSAERPE-RSVSTLK------IQRTEQGDSAVYLCAS
SL-----
>V25RF-AACZ03053983.1-trbv |(33686, 33982)|2.47294280967|(0.970,0.833,0.824)|1
-----PVDAGVTQSPTHLIKTRGQQVTLRCSPQSG-------HNTVSWYQQALGQGPQFI
FQYYREE---EN--GR-GNFSPRFSGRQFP-NYSSELN------VNALELDDSALYLCAS
SL-----
>V26RF-AACZ03053983.1-trbv |(40132, 40429)|2.61397927633|(0.971,0.892,0.841)|1
-----PVNAGVTQTPKFRILKIGQSMTLQCAQDMN-------HNYMYWYRQDPGMGLKLI
YYSVGAG--I----TDKGEVPNGYNVSRST-TEDFPLR------LESAAPSLTSVYFCAS
SY-----
>V28RF-AACZ03053984.1-trbv |(12230, 12526)|2.66957158688|(0.941,0.832,0.943)|1
-----PVDAGVTQSPTHLIKTRGQQVTLRCSPISG-------HTSVSWYQQALGQGPQFI
FQYYEKE---ER--GR-GNFPDRFSACQFP-NYSSELN------VNALLLGDSALYLCAS
SL-----
>V29RF-AACZ03053986.1-trbv |(8, 308)|2.74116605151|(0.904,0.955,0.893)|1
-----HTGAGVSQSPRYKVTKRGQDVTLRCDPISG-------HVALYWYRQALGQGPEFL
TYFNYE---AQP--DKSGLPNDRFSAERPE-GSNSTLT------IQRTEQRDSAMYLCAS
SL-----
>V32RF-AACZ03053988.1-trbv |(2688, 3003)|2.70481467261|(0.894,0.935,0.883)|1
SISTDHTGAGVSQSPRYKVTKRGQDVTLRCDPISS-------HATLYWYQQALGQGPEFL
TYFNYEA---QP--DKSGLPNDRFSAERPE-GSNSTQT------IQRTEQRDSAMYLCAS
SL-----
>V33RF-AACZ03053988.1-trbv |(11127, 11423)|2.61741701327|(0.945,0.808,0.937)|1
-----PVDAGVTQSPTHLIKTRGQHVTLRCSPISG-------HTSVSWYQQALGQGPQFI
FEYYEKE---ER--GR-GNFPDRFSARQFP-NYSSELN------VNALLLGDSALYLCAS
SL-----
>V34RF-AACZ03053988.1-trbv |(18445, 18742)|2.62866718477|(0.902,0.899,0.842)|1
-----PVNAVVTQTPKFQVLKTGQSMTLQCAQDMN-------HDCMSWYRQDPGMGLRRI
HYSVAAG--I----TDKGEVPDGYNVSRSN-KEDLPLR------LESAAPSQTSVYFCAS
SY-----
>V35RF-AACZ03053988.1-trbv |(23071, 23371)|2.72953425318|(0.918,0.882,0.936)|1
-----HTGAGVSQSPRYKVTKRGQDVALRCDPISG-------HVSLFWYQQALGQGPEFL
TYFRNE---AQL--DKSGLPSDRFFAERPE-GSVSTLK------IQRTQQEDSAVYLCAS
SL-----
>V36RF-AACZ03053988.1-trbv |(31286, 31582)|2.43677680958|(0.951,0.758,0.884)|1
-----PVEAGVTQSPTHLIKTRGQQVTLRCSPISG-------HTSVYWYQQALGLGLQFL
LWYDEG---EER--NRGNF-PRRFSGRQFP-NYSSELN------VNALELEDSALYLCAS
SL-----
>V37RF-AACZ03053988.1-trbv |(40506, 40806)|2.65356899524|(0.885,0.863,0.910)|1
-----HADTGVSQDPSHKITKRGQNVTFRCDPISE-------HNRLYWYRQTLGQCPEFL
TYFQNEA---QL--EKSRLLSDRFSAERPK-GSFSTLE------IQHTEQGDSAIYLCAS
SL-----
>V38RF-AACZ03053988.1-trbv |(47037, 47334)|2.5798548145|(0.930,0.777,0.968)|1
-----SVAAGVIQSPRYLIKEKRETATLKCYPIPR-------HDTVYWYQQGPGQDPQFL
ISFYEKM---QS--DK-GSIPDRFSAQQFS-DYHSELN------MSSLELGDSALYFCAS
SS-----
>V39RF-AACZ03053988.1-trbv |(55269, 55566)|2.4965476101|(0.937,0.950,0.746)|1
-----HMDAGITQSPRHKVTETGTPVTLRCHQTEN-------HRYMYWYRQDPGHGLRLI
HYSYDVK--D----TDKGEVSDGYSVSRSK-TEDFLLT------LESTTSSQTSVYFCAI
SE-----
>V41RF-AACZ03053989.1-trbv |(12103, 12403)|2.46969013592|(0.967,0.928,0.751)|1
-----HTDAGVIQSPRHEVTEMGQEVTLRCKPISG-------HNSLFWYRQTMMQGLELL
IYFNNN---VPI--DDSGMPKDRFSAKMPN-ASFSTLK------IQPSEPRDSAVYFCAS
SL-----
>V43RF-AACZ03053991.1-trbv |(13707, 14007)|2.47306471896|(0.928,0.815,0.823)|1
-----HIEAGVTQFPSHSVIEKGQTVTLRCDPVSG-------HDNLYWYRRVMGNEIKFL
LHFVKES---KQ--DESGMPNNRFLAERTG-GTYSTLK------VQPAELEDSGVYFCAS
SQ-----
>V44RF-AACZ03053991.1-trbv |(18826, 19123)|2.43413833878|(0.837,0.852,0.766)|1
-----HGDAKVIQNPRYQVTQFEKPVTLGCSQNLN-------HNVMYWYQQKSSQAPKLL
FHYYDKD---FN--NE-ADTPDNFQSRRPN-TSFCFLD------IRSPGLGDAAMYLCAT
SR-----
>V45RF-AACZ03053991.1-trbv |(23811, 24111)|2.55115457633|(0.887,0.803,0.889)|1
-----SPGEEVTQTPKHLVRGEGQKAKLYCAPIKG-------HSYVFWYQQVLKKEFKFL
ISFQNEN---VF--DKTGMPKERFSAKCLS-NSPCSLE------IQATKLEDSAVYFCAS
SQ-----
>V47RF-AACZ03053991.1-trbv |(44878, 45175)|2.57278802605|(0.850,0.896,0.836)|1
-----TVDGGITQSPKYLFRKEGQNVTLNCEQNLN-------HDAMYWYRQDPGQGLRLI
YYSQIVN--D----FQKGDIAEGYSVSREK-KESFPLT------VTLAQKNPTAFYLCAS
SI-----
>V50RF-AACZ03053992.1-trbv |(16518, 16818)|2.66392981862|(0.907,0.871,0.892)|1
-----SFHAKVTQTPGHLVKGKGQKTKMDCTPEKG-------HVFVYWYQQNQNKEFMLL
ISFQNEQ---VL--QETEMHKKRFSSQCPK-NTPCSLA------ILSSEPGDTALYLCAS
SQ-----
>V51RF-AACZ03053992.1-trbv |(27256, 27554)|2.45547413026|(0.906,0.903,0.745)|1
-----SMDADVTQTPRNRITKTGKRIMLECSQTKG-------HDRMYWYRQDPGLGLRLI
YYSFDVK--D----INKGEISDGYSVSRQA-QAKFSLS------LESAIPNQTALYFCAT
SD-----
>V52RF-AACZ03053992.1-trbv |(41278, 41575)|2.75812824764|(0.913,0.926,0.920)|1
-----LMEADIYQTPRYLVIGTGKKIALECSQTMG-------HDKMYWYQQDPGMELHLI
HYSYGVN--S----TEKGDLSSESTVSRIR-TEHFPLT------LESARPSHTSQYLCAS
SE-----
>V54RF-AACZ03053994.1-trbv |(21067, 21364)|2.49474512632|(0.868,0.843,0.803)|1
-----PLEAQVTQNPRYLITVTGKKLTVTCSQNMN-------HDYMSWYRQDPGLGLRQI
YYSVNVE--V----IDKGDVPEGYNVSRKE-KRNFPLI------LESPSPNQTSLYFCAS
SL-----
>V55RF-AACZ03053994.1-trbv |(26364, 26661)|2.73644677355|(0.920,0.872,0.960)|1
-----LVDVKVTQSSRYLVKRMGEKVFLECVQDMD-------HENMFWYRQDPGLGLRLI
YFSYDVK--M----KEKGDIPEGYSVSREK-KERFSLI------LESASTNQTSMYLCAS
SL-----
>V59RF-AACZ03067000.1-trbv |(17891, 18182)|2.54787003685|(0.906,0.823,0.856)|1
-----LMEAEIYQTPRHRVIGTGKKITLECSQTMG-------HDKMYWSRSRNGITPHPP
FLW--VN--S----TEKGDLSSESTVSRIR-IERFPLT------LESASPSHTSQYLCAS
SE-----
>V60RF-AACZ03067007.1-trbv |(7737, 8040)|2.67629443766|(0.891,0.851,0.959)|1
----SVFSAVISQKPSRDICQRGTSMTIQCQVDSQ-------VTMMFWYCQQPGQSMTLI
ATANQGS--EAT--YESRFVIDKFPISRPN-LTFSTLT------VSNRRPEDSSIYLCSV
E------
>V61RF-AACZ03070936.1-igkv |(7433, 7733)|3.0|(1.000,1.000,1.000)|1
----ARCDIQMTQSPSSLSASVGGRVTITCRASQGIS------NNLNWYQQKPGKTPKLL
IY----A--AS---SLQSGIPSRFSDSGS--GTDYTLT------ISSLQPEDFATYYCQQ
SDSTP--
>V63RF-AACZ03095312.1-trav |(40528, 40815)|2.51050019522|(0.864,0.821,0.836)|1
-----VRSQQPVQSPQAVILREGEDAVINCSSSKA-------LYSVHWYRQKHGEAPVFL
MMLLKGG--EQ---KGHDKISASFNEK----KQQSSLY------LMASQLSYSGTYFCGA
E------
>V65RF-AACZ03095314.1-trav |(457, 747)|2.56691409766|(0.825,0.884,0.887)|1
----VSSEDKVVQSPLSLVVHEGDTVTLNCSYEVT-----N-FQSLLWYKQEK-KAPTFL
FMLTSSG--IE---KKSGRLSSILDKK----ELFSILN------ITATQTGDSAIYLCAV
E------
>V67RF-AACZ03095317.1-trav |(36941, 37243)|2.78778066996|(0.934,0.938,0.917)|1
----FSMAQTVTQTQPEMSVQEAETVTLSCTYDTS-----ESDYYLFWYKQPPSRQMILV
IRQEAYK--QQN--ATENRFSVNFQKA----AKSFSLK------ISDSQLGDAAMYFCAY
RS-----
>V68RF-AACZ03095319.1-trav |(17030, 17318)|2.51151530904|(0.864,0.770,0.929)|1
----LSGELKVEQNPLFLSTQEGKNYTIYCNYSTT-------SDRLYWYRQDPGKSLESL
FVLLSNG--AV---KQEGQLMASLDTK----ARLSTLH------ITAAVHDLSATYFCAV
-------
>V75RF-AACZ03097612.1-trav |(9441, 9731)|2.88592000218|(0.960,0.964,0.962)|1
----MSRGEDVEQS-LFLSVREGDSSVINCTYTDS-----S-STYLYWYKQEPGAGLQLL
TYIFSNM--DM---KQDQRLTVLLNKK----DKHLSLR------IADTQTGDSAIYFCAE
S------
>V76RF-AACZ03097613.1-trav |(2901, 3189)|2.64942223399|(0.851,0.925,0.908)|1
-----VKSQKIEQNSEALNIQEGKTATLTCNYTNY-----S-PAYLQWYRQDPGRGPVFL
LLIRENE--KE---KRKERLKVTFDTT----LKQGVFH------ITASQPADSATYLCAL
-------
>V77RF-AACZ03097613.1-trav |(17275, 17562)|2.68209993149|(0.894,0.874,0.918)|1
----ANGENQVEHSPHFLGPQQGDVASMSCTYSVS-----R-FNNLQWYRQNTGMGPKHL
LSMYSAG--YE---KQKGRLNATLLKN------GSSLY------ITAVQPEDSATYFCAV
D------
>V78RF-AACZ03097613.1-trav |(45730, 46024)|2.8984031274|(0.957,0.982,0.962)|1
----GINGDSVVQTEGQVLLSEGDSLIVNCSYETT-----QY-PSLLWYVQYPGEGPQLL
LKAMKA---NDN--GRNKGFEATYRKE----TTSFHLE------KDSVQESDSAVYFCAL
S------
>V79RF-AACZ03097613.1-trav |(59820, 60113)|2.65074541806|(0.852,0.889,0.965)|1
----GSGKNQVEQSPQSLIILEGKNCTLQCNYTVS-----P-FNNLRWYKQDTGRGPVSL
TIMTFSE--NT---KSNGRYTATLDAD----TKQSSLH------ITASQLSDSASYICVV
S------
>V80RF-AACZ03097613.1-trav |(75553, 75841)|2.75344440614|(0.912,0.882,0.983)|1
---VWSQRKEVEQDPGPFNVPEGATVAFNCTYSNS-----A-SQSFFWYRQDCRKEPKLL
MSVYSSG--N-----EDGRFTAQLNRA----SQYISLL------IRDSKLSDSATYLCAV
-------
>V81RF-AACZ03097613.1-trav |(86767, 87064)|2.44630521572|(0.929,0.789,0.837)|1
----TVRAQSVTQPDIHITVSEGASLELRCNYSYG-----AT-PSLFWYVQSPGQGLQLL
LKYFSGD--TLV--QGIKGFEAEFKRS----QSSFNLR------KPSVHWSDAAEYFCAV
G------
>V82RF-AACZ03097614.1-trav |(12294, 12584)|2.75496931699|(0.924,0.939,0.896)|1
-----VNGENVEQHPSTLSVQEGDGAVIKCTYSDS-----A-SNYFPWYKQELGKGPQLI
IDIHSNM--GE---KKDQRIAVTLNKT----AKHFSLH------ITETQPEDSAVYFCAA
S------
>V83RF-AACZ03097614.1-trav |(31772, 32063)|2.74861758657|(0.915,0.901,0.935)|1
---VWSQQKEVEQNSGPLSVPEGAIVSLNCTYSDR-----R-SQSFFWYRQYSGKSPELI
MSIYSNG--DE----EDGKFTAQLNKA----SQYVSLL------IRDSQPSDSATYLCAV
-------
>V84RF-AACZ03097614.1-trav |(38270, 38567)|2.57928544142|(0.929,0.867,0.834)|1
----GTRAQSATQLDSHVSVSEGALVLLRCNYSSS-----VP-PYLFWYVQYPNQGLQLL
LKYTTGA--TLV--KGINGFEAEFKKS----ETSFHLT------KPSAHVNDAAEYFCAV
S------
>V86RF-AACZ03097618.1-trav |(4827, 5130)|2.84713755993|(0.955,0.934,0.960)|1
----PGIAQKITQTQPGMFVQEKEAVTLDCTYDTS-----DQSYGLFWYKQPSSGEMIFL
IYQGSYD--QQN--ATEGRYSLNFQKA----RKSANLV------ISASQLGDSAMYFCAM
KE-----
>V87RF-AACZ03097618.1-trav |(21644, 21938)|2.83247644675|(0.935,0.929,0.975)|1
----RTRGDSVTQMEGPVTLSEEAFLTINCTYTAT-----GY-PSLFWYVQYPGEGLQLL
LKATKA---DDK--GSNKGFEATYRKE----TTSFHLE------KDSVQASDSAVYFCAL
S------
>V88RF-AACZ03097619.1-trav |(24003, 24296)|2.78470868378|(0.927,0.900,0.967)|1
---VWSQQKEVEQDPGPLSVPEGAIASLNCTYSNS-----A-FQYFMWYRQYSRKGPELL
MYTYSSD--NK----EDGRFTAQVDKS----SKYISLF------IRDSQPSDSATYLCAM
S------
>V90RF-AACZ03097619.1-trav |(56042, 56329)|2.73366902748|(0.908,0.889,0.943)|1
-----VNSQQGEEDPQALSIQEGENAIMNCSYKT------S-INNLQWYRQNSGRGLVHL
ILIRSNE--RE---KHSGRLRVTLDTS----KKSSSLL------ITASRAADTASYFCAT
D------
>V92RF-AACZ03097619.1-trdv |(66115, 66418)|2.26796052424|(0.761,0.763,0.745)|1
----SSMAQKVTQAQTEISVVEKEDVTLDCVYETR-----DTTYYLFWYKQPPSGELVFL
IRRNSFD--EQN--EISGRYSWNFQKS----TSSFNFT------ITASQVVDSAVYFCAL
SE-----
>V93RF-AACZ03097619.1-trav |(99749, 100036)|2.41148420163|(0.910,0.872,0.742)|1
----LSGEDQVTQSPEALRLQEGESSSLNCSYTVS-----G-LRGLFWYRQDPGKGPEFL
FALYSAG--EE---KEKERLKATLTKK------ESFLH------ITAPKPEDSATYLCAV
Q------
>V96RF-AACZ03097622.1-trdv |(8097, 8397)|2.08536559884|(0.781,0.592,0.923)|1
----SSVAQKVTQAQSSVSMPVRKAVTLNCLYEASW----WS-YYIFWYKQLPSKEMVFL
IRQGSGE--Q-N--AKSGRYSVNFKKA----AKSVALT------ISALQLEDSAKYFCAF
WE-----
>V101RF-AACZ03097899.1-ighv |(75199, 75508)|2.96812379208|(0.976,0.999,0.997)|1
----VQCEVQLLE-SGGGLVQPGGSLRLSCAASGFTF-S---SYWMHWVRQAPGKGLEWV
SRINSD-G-SST--SYADSVKGRFTISRDNAKNTLYLQ------MNSLRAEDTAVYYCTR
-------
>V102RF-AACZ03097899.1-ighv |(83090, 83405)|2.96878066996|(0.997,0.980,0.993)|1
----VQCEVQLVE-SGGGLVQPGGSLRLSCAASGFTF-S---GSAMHWVRQASGKGLEWV
GRIRSKANSYAT--AYAASVKGRFTISRDDSKNTAYLQ------MNSLKTEDTAVYYCAR
-------
>V103RF-AACZ03097900.1-ighv |(7950, 8265)|2.87608531693|(0.954,0.992,0.937)|1
----VQCEVQLLE-SGGGLVQPGGSLRLSCAASGFTF-S---DYYMDWVRQAPGKGLEWV
GRIRNKANSYTT--EYAASVKGRFTISRDDSKNSLYLQ------RNSLKTEDTAVYYCTR
-------
>V104RF-AACZ03097900.1-ighv |(23404, 23719)|2.88282633717|(0.948,0.996,0.948)|1
----VQCEVQLVE-SRGGLVQPGGSLRLSCAVSGFTF-S---DYYMSWVRQAPGKGLEWV
GFIRNKANGGTT--EYTTSVKGRFTISRDDSKSITYLQ------MNSLKTEDTAVYYCSR
-------
>V107RF-AACZ03097900.1-ighv |(75733, 76039)|2.99698000014|(0.998,0.999,1.000)|1
----VQCEVQLVE-SGGGLVQPGGSLRLSCAASGFTF-S---SYHMSWVRQAPGKGLEWV
SVIYSG--G-ST--YYADSVKGRFTISRDNSKNTLYLQ------MNSLRAEDTAVYYCAR
-------
>V108RF-AACZ03097900.1-ighv |(92730, 93036)|2.9949000027|(0.996,0.999,1.000)|1
----VQCEVQLVE-SGGGLVQPGGSLRLSCAASGFTF-S---SYAMHWVRQAPGKGLEWV
SLIYSG---DST--YYADSVKGRFTISRDNSKNTLYLQ------MGSLRAEDTAVYYCAR
-------
>V109RF-AACZ03097904.1-ighv |(3428, 3734)|2.86980713845|(0.982,0.912,0.996)|1
----VLSQLQLQE-SGPGLVKPSETLSLTCTVSGGSI-S---SYYWSWIRQPPGKGLEWI
GYIYYS---GSA--YYNPSLKSRVTISVDTSKNQFSLK------LSSVTAADTAVYYCAR
-------
>V111RF-AACZ03097906.1-ighv |(13610, 13916)|2.9969280013|(0.997,1.000,1.000)|1
----VQCEVQLVE-SGGGLVQPGGSLRLSCAASGFTV-S---SYHMSWVRQAPGKGLEWV
SVIYSG--G-ST--YYADSVKGRFTISRDNSKNTLYLQ------MNSLRAEDTAVYYCAR
-------
>V113RF-AACZ03097906.1-ighv |(49257, 49572)|2.90080001|(0.967,0.972,0.962)|1
----VQCEVQLVE-SGGGLVQPGRSLRLSCTASGFTF-G---DYAMSWIRQAPGKGLEWV
GFIRSKAYGGTT--EYAASVKGRFTISRDDSKSIAYLQ------MNGLKTEDTAVYYCTR
-------
>V115RF-AACZ03097906.1-ighv |(72260, 72569)|2.89085291224|(0.956,0.984,0.954)|1
----AHSQVQLVQ-SGAEVKKPGASVKVSCKASGYTF-T---SYTISWLRQAPGQGLEWM
GVISPS-D-GST--SYAQKFQGRVTMTRDTSTSTVYME------LSSLRSEDTAVYYCAR
-------
>V116RF-AACZ03097906.1-ighv |(76385, 76694)|2.86237212748|(0.956,0.962,0.945)|1
----AYSQMQLVQ-SGAEVKKPGSSVKVSCKASGYTF-T---YRYLHWVRQAPGQALEWM
GWITPY-N-GNT--NYAQKFQDRVTITRDRSMSTAYME------LRSLRSEDSAVYYCAR
-------
>V117RF-AACZ03097910.1-ighv |(1033, 1344)|2.96460565256|(1.000,0.997,0.971)|1
----VQCEVQLVE-SGGGVVQPGGSLRLSCAASGFTF-D---DYAMHWVRQAPGKGLEWV
SLISWD--GGST--YYADSVKGRFTISRDNSKNSLYLQ------MNSLRAEDTALYYCAK
D------
>V118RF-AACZ03097912.1-ighv |(17400, 17707)|2.87753001165|(0.990,0.984,0.922)|1
----VQCEVQLVE-SGGGLVQPESSLKLSCAASGFTF-S---SYAMNWVRQAPGKGLEWV
AHIWND-G-SQK--YYADSVKGRFTISRDNSKSMLYLQ------MDSLKAEDTAMYYCT-
-------
>V119RF-AACZ03097916.1-ighv |(3845, 4154)|2.95148760715|(1.000,0.969,0.987)|1
----VLSQVQLQE-SGPGLVKPSETLSLTCAVSGYSI-S-SG-YYWGWIRQPPGKGLEWI
GSIYHS---GST--YYNPSLKSRVTISVDTSKNQFSLK------LSSVTAADTAVYYCAR
-------
>V122RF-AACZ03098145.1-ighv |(4162, 4471)|2.91884844335|(0.951,1.000,0.981)|1
----VQCQVQLVE-SGGGVVQPGRSLRLSCAASGFTF-S---SYGMHWVRQAPGKGLEWV
AFISYD-G-SNK--HYADSVRGRFTISRDNSKNTLYLQ------MNRLRAEDTAVYYCAR
-------
>V125RF-AACZ03098176.1-ighv |(689, 998)|2.84013563933|(0.983,0.936,0.938)|1
----VQCQVRLVE-SGGGVVQPGRSLRLSCAASGFTF-S---SYGMHWVRQAPGKGLEWV
AFIQYD-G-SNK--YYADSVKGRFTISKDNSKNTLYLQ------MNSLRAEDTAVYYCAR
-------
>V128RF-AACZ03106490.1-ighv |(5495, 5804)|2.86341488175|(0.927,0.976,0.982)|1
----VQCEVQLVE-SGGGLVQPGGSLRLSCAASGFTF-S---SYWMHWVRQAPGKGLVWV
SRINSD-G-SST--SYADSLKGQFTISRDNAKNTLYLQ------MNSLRAEDMAVYYCTR
-------
>V131RF-AACZ03126842.1-igkv |(27906, 28206)|2.95279341439|(0.997,1.000,0.961)|1
----ARCDIQMTQSPSSLSASVGDRVTITCRASQGIS------NNLNWYQQKPGKTPKLL
IY----A--AS---SLQSGIPFRFSDSGS--GTDYTLT------ISSLQPEDFATYYCQQ
SDSTP--
>V132RF-AACZ03127129.1-iglv |(13910, 14207)|2.70099720894|(0.966,0.829,0.979)|1
----SVASYELTQ-PSSVSVSPGQTARITCSG------DVLAKNYARWFQQKPGQAPVLV
IY----K--DS---ERPSGIPERFSGSSS--GTTVTLT------ISGAQVEDEADYYCYS
AADNN--
>V133RF-AACZ03127129.1-iglv |(32581, 32884)|2.93371286789|(0.997,0.955,0.989)|1
----SEASYELTQ-PPSVSVSPGQTARITCSG------DALPKQYAYWYQQKPGQAPVLV
IY----K--DS---ERPSGIPERFSGSSS--GTTVTLT------ISGVQAEDEADYYCQS
ADSSGTY
>V134RF-AACZ03127131.1-iglv |(7169, 7472)|2.83026541037|(0.984,0.926,0.941)|1
----SVTSYELTQ-PPSVSVAPGQTARITCGG------NNIGSKAVHWYQQKPGQAPVLV
IY----Y--DS---DRPSGIPERFSGSNS--GNTATLT------ISRVEAGDEADYYCQV
WDSSSKH
>V135RF-AACZ03127131.1-iglv |(15097, 15400)|2.72897270218|(0.955,0.847,0.974)|1
----SVVSSELTQ-DPAVSVALGQTVRITCQGDSL---R---SYYASWYQQKPGQAPVLV
IY----G--NN---NRPSGIPDRFSGSSS--GNTASLT------ITGAQAEDEADYYCSS
LDSSGNH
>V136RF-AACZ03127135.1-iglv |(12358, 12661)|2.78062577958|(0.991,0.869,0.979)|1
----SEASYELTQ-PPSVSVSLGQTARITCSG------EALPKKYAYWYQQKPGQAPVLV
IY----K--DS---ERPSGIPERFSGSSS--GTIVTLT------ISGVQAEDEADYYCQS
ADSSGTY
>V139RF-AACZ03127139.1-iglv |(22125, 22435)|2.78524548034|(0.991,0.900,0.938)|1
----SWAQSALTQ-PPSVSRSPGQSVTISCTGTSS---DVGGYNYVSWYQQHPGKAPKLM
IY----D--VS---KRPSGVPDRFSGSKS--GNTASLT------ISGLQAEDEADYYCCS
YAGSYS-
>V140RF-AACZ03127139.1-iglv |(41415, 41718)|2.93766265282|(0.987,0.963,0.990)|1
----SEASYELTQ-PPSVSVSPGQTARITCSG------DALPKQYAYWYQQKSGQAPVLI
IY----E--DS---KRPSGIPERFSGSSS--GTMATLT------ISGAQVEDEADYYCYS
TDSSGNH
>V142RF-AACZ03127139.1-iglv |(52418, 52728)|2.63441982668|(0.994,0.956,0.813)|1
----SWAQSALTQ-PPSASGSPGQSVTISCTGTSS---DIGGYNYVSWYQQHPGKAPKLM
IY----E--VS---KRPSGVPDRFSGSKS--GNTASLT------VSRLQAEDEADYYCSS
YAGSNN-
>V144RF-AACZ03127143.1-iglv |(3944, 4240)|2.88594139915|(0.989,0.953,0.954)|1
----SVASYELTQ-PPSVSVSPGQTASITCSG------DKLGDKYAYWYQQKSGQSPVLV
IY----Q--DS---KRPSGIPERFSGSNS--GNTATLT------ISGTQAMDEADYYCQA
WDSST--
>V147RF-AACZ03151853.1-igkv |(48491, 48784)|2.99798400013|(1.000,1.000,0.998)|1
----ARCDIQMTQSPSSLSASVGDRVTITCRASQSIS------NYLSWYQQKPGKAPKLL
IY----D--AS---TLQSGVPSRFSGSGS--GTDFTLT------ISSLQPEDFATYYCQR
GYG----
>V148RF-AACZ03151853.1-igkv |(70778, 71078)|2.783310305|(0.996,0.866,0.987)|1
----ARCDIQLTQSPSSLSASVGDRVTITCQASQDIS------NYLNWYQQKPGKVPKLL
IY----S--AS---NLQSGVPSRFSGSGS--GTDFTLT------ISSLQPEDVATYYCQR
TYNAP--
>V151RF-AACZ03151853.1-igkv |(133574, 133889)|2.87619828468|(0.988,0.956,0.944)|1
----SSADIVMTQTPLSLSVTPGQPASISCKSSQSLLH-SDGNTYLYWYLQKPGQSPQLL
IY----R--VS---NRASGVPDRFSGSGS--GTDFTLK------ISQVEAEDVGVYYCMQ
GIQLP--
>V153RF-AACZ03151853.1-igkv |(154335, 154635)|2.87856133106|(0.999,0.920,0.985)|1
----TRCDIQMTQSPSSLSASVGDRVTITCWASQGIS------NYLAWYQQKPGKVPKLL
IY----A--AS---TLQSGVPSRFSGSGS--GTDFTLT------ISSLQPEDVATYYCQK
YNSAP--
>V154RF-AACZ03151853.1-igkv |(190625, 190927)|2.84321501844|(0.965,0.956,0.928)|1
----SSGDIVMTQTPLSSPVTLGQPASISCRSSQSLVH-SDGNTYLSWLQQRPGQPPRLL
IY----K--VS---NRFSGVPDRFSGSGA--GTDFTLK------ISRVEAEDVGVYYCTQ
A------
>V156RF-AACZ03151855.1-igkv |(12698, 12994)|2.91172560727|(0.997,0.935,0.995)|1
----TTGEIVLTQSSATLSLSPGERATLSCRASQSVS-----SSYLAWYQQKPGQAPRLL
IY----D--AS---SRATGIPDRFSGSGS--GTDFTLT------ISRLEPEDFAVYYCQQ
YGS----
>V157RF-AACZ03151855.1-igkv |(28194, 28494)|2.96285201038|(0.990,0.989,0.984)|1
----ARCDIQMTQSPSSLSASVGDRVTITCRASQGIS------NYLAWFQQKPGKAPKRL
IY----A--AS---SLQSGVPSRFSGSGS--GTEFTLT------ISSLQPEDFATYYCLQ
HNSYP--
>V158RF-AACZ03151855.1-igkv |(45639, 45939)|2.95386891211|(0.995,0.967,0.995)|1
----ARCDIQMTQSPSSLSASVGDRVTITCRASQGIS------SWLAWYQQKPGKAPKPL
IY----A--AS---SLQSGVPSRFSGSGS--GTEFTLT------ISSLQPEDFATYYCQQ
YNSYP--
>V160RF-AACZ03151857.1-igkv |(4301, 4601)|2.90924200392|(0.997,0.932,0.997)|1
----ARCAIQLTQSPSSLSASVGDRVTITCRASQGIS------NRLNWYQQKPGKAPKLL
IY----D--AS---SLESGVPSRFSGSGS--GTDFTLT------ISSLQPEDFATYYCQQ
FNSYP--
>V161RF-AACZ03151857.1-igkv |(10072, 10372)|2.87621336006|(0.986,0.983,0.923)|1
----ASCDIQMTQSPSSVSASVGDRVTITCQASQGIS------SWLAWYQQKPGKAPKLL
IY----A--AS---SLQSGVPSRFSGNGS--GTDFTLT------ISSLQPEDFATYYCQQ
ANSFP--
>V162RF-AACZ03151858.1-igkv |(2327, 2627)|2.85024085663|(0.999,0.928,0.952)|1
----TTGEIVLTQSPATLSLSPGEKATLSCRASQSVS------SYLAWYQQKPGQAPRLL
IY----D--AS---NRATGISARFSGSGS--GTDFTLT------ISSLEPEDFAVYYCQQ
RSNWH--
>V163RF-AACZ03151858.1-igkv |(39404, 39704)|2.94751245716|(0.998,0.966,0.988)|1
----ARCAIQMTQSPSSLSASVGDRVTITCRASQGIS------SYLAWYQQKPAKAPKLL
IY----Y--AS---SLQSGVPSRFSGSGS--GTEFTLT------ISSLQPEDFATYYCQQ
LNSYP--
>V165RF-AACZ03151979.1-igkv |(10219, 10519)|2.96577645736|(0.981,0.996,0.990)|1
----AKCDIQMTQSPSTLSASVGDRVTITCRASQGIS------SYLNWYQQKPGKAPKLL
IY----A--AS---TLESGVPSRFSGSGS--GTEFTLT------ISSLQPDDFATYYCQQ
YSSTP--
>V168RF-AACZ03171037.1-ighv |(52793, 53102)|2.97598000014|(0.993,0.992,0.991)|1
----VQCEVQLVE-SGGGLVKPGGSLRLSCAASGFTF-S---SYAMHWVRQAPEKGLEWV
STISG-SG-GST--WYPDSVKGRFTISRDNSKNTLYLQ------MNSLRAEDTAVYYCAR
-------
>V169RF-AACZ03171037.1-ighv |(63661, 63976)|2.88646301927|(0.994,0.999,0.917)|1
----VQCEVQLVE-SGGGLVKPGGSLRLSCAASGFTF-S---SYSMNWVRQAPGKGLEWV
GFIRTKAKGGTT--EYAASVKGRFTISRDDSKSIAYLQ------MNSLKTEDTAVYYCTR
-------
>V170RF-AACZ03171037.1-ighv |(86377, 86686)|2.99494800078|(1.000,0.998,0.997)|1
----VQCEVQLVE-SGGGLVQPGGSLRLSCAASGFTF-S---SYGMHWVRQAPGKGLEWV
SYISYD--SSYI--YYADSVKGRFTISRDNAKNSLYLQ------MNSLRAEDTAVYYCAT
-------
>V171RF-AACZ03171037.1-ighv |(116832, 117141)|2.91750594477|(0.991,0.997,0.940)|1
----VQCEVQLVE-SGGGLVQPGGSLRLSCAASGFTF-D---DYGMSWVRQAPGKGLEWV
SLISWD--GGST--YYADSVKGRFTISRDNSKNSLYLQ------MSSLRAEDTALYYCAR
-------
>V172RF-AACZ03171037.1-ighv |(129850, 130159)|2.94619314055|(0.997,0.984,0.969)|1
----AHSQVQLVQ-SGAEVKKPGASVKVSCKASGYTF-T---SYDINWVRQATGQGLEWM
GWMNPN-S-GNT--GYAQKFQGRVTMTRDTSISTAYME------LSSLRSEDTAVYYCAR
-------
>V173RF-AACZ03171037.1-ighv |(150598, 150907)|2.92594130442|(0.959,0.988,0.985)|1
----VQCEVQLVE-SGGGLVQPGGSLTLSCAASGFTF-S---SYWMSWVRQAPGKGPEWV
ANIKKD-G-SEK--YYADSVKGRFTISRDNAKNSLYLQ------MNSLRAEDTAVYYCTR
-------
>V176RF-AACZ03171037.1-ighv |(187799, 188108)|2.90309801429|(0.997,0.991,0.932)|1
----AHSQVQLVQ-SGSEVKKPGASVKVSCKASGYTF-T---SYAMNWVRQAPGQGLEWM
GWINTN-T-GNP--TYAQGFTGRFVFSLDTSVSTAYLQ------ISSLKAEDTAVYYCAR
-------
>V177RF-AACZ03171037.1-ighv |(200692, 201001)|2.88094828116|(0.986,0.994,0.919)|1
----VLSQVQLQE-SGPGLVKPSETLSLTCAVSGGSI-S-S-SNWWSWVRQPPGKGLEWI
GEIYHS---GSP--NYNPSLKSRVTISVDKSKNQFSLK------LSSVTAADTAVYYCAR
-------
>V178RF-AACZ03171395.1-trav |(594, 882)|2.64942223399|(0.851,0.925,0.908)|1
-----VKSQKIEQNSEALNIQEGKTATLTCNYTNY-----S-PAYLQWYRQDPGRGPVFL
LLIRENE--KE---KRKERLKVTFDTT----LKQGVFH------ITASQPADSATYLCAL
-------
>V184RF-AACZ03176953.1-iglv |(46517, 46826)|2.88447964651|(0.949,0.965,0.974)|1
----SWAQSVLTQ-PPSASGTPGQRVTISCSGSSS---NIG-SNTVNWYQQLPGTAPKLL
IY----S--NN---QRPSGVSDRFSGSKS--GTSASLA------ISGLRSEDEADYYCAA
WDDSLSG
>V187RF-AACZ03176987.1-iglv |(5895, 6205)|2.85001795733|(0.951,0.917,0.994)|1
----SWANFMLTQ-PHSVSESPGQTVTISCTRSSG---SIA-SDYVQWYQQRPGSAPTTV
IY----E--DN---RRPSGVPDRFSGSIGSSSNSASLT------ISGLKSEDEADYYCQS
YDSSS--
>V188RF-AACZ03179884.1-ighv |(12665, 12971)|2.96950885865|(0.982,1.000,0.989)|1
----VQCEVQLVQ-SGGGLVQPGGSLRLSCAGSGFTF-S---SYAMHWVRQAPGKGLEWV
SAIGTG---GGT--YYADSVKGRFTISRDNAKNSLYLQ------RNSLRAEDMAVYYCAR
-------
>V189RF-AACZ03182257.1-ighv |(5938, 6245)|2.95942016586|(0.983,0.982,0.995)|1
----AQCEVQLVE-SGGGLVQPGGSLRLSCAASGFTF-S---NHYTSWVLQAPGKGLEWV
SYISGD-R-GYT--NYADSVKGRFTISRDNAKNSLYLQ------MNSLRAEDTAVYYCV-
-------
>V190RF-AACZ03015561.1-igkv |(2130, 2430)|2.78755009053|(0.968,0.989,0.870)|-1
----AKCDIQMTQSPSTLSASVGDRVTITCRASQGIS------SWLAWYQQKPGKAPKLL
IY----K--AS---SLESGVPSRFSSSGS--GTEFTLT------ISSLQPDDFATYYCQQ
YSSYP--
>V192RF-AACZ03015561.1-igkv |(34244, 34556)|2.78571506744|(0.905,0.977,0.926)|-1
----CNGDIVLTQSPASLAVSPGQRATITCRASESVSF--LGINLIHWYQQKPGQPPKLL
IY----Q--AS---NKDTGVPARFSGSGS--GTDFTLT------INLVEANDTANYYCLQ
SKNFP--
>V193RF-AACZ03015562.1-igkv |(7056, 7356)|2.99699200002|(0.999,1.000,0.998)|-1
----TRCDIQMTQSPSSLSASVGDRVTITCRASQGIS------NYLAWYQQKPGKAPKLL
IY----Y--AS---RLESGVPSRFSGSGS--GTDYTLT------ISSLQPEDFATYYCQQ
YNSNP--
>V194RF-AACZ03015562.1-igkv |(21131, 21434)|2.86488398473|(0.997,0.967,0.925)|-1
----TIGEIVMTQSPATLSLSPGERATLSCRASQSVS-----SSYLSWYQQKPGQAPRLL
IY----G--AS---TRATGIPARFSGSGS--GTDFTLT------ISSLQPEDFAVYYCQQ
DYKLP--
>V195RF-AACZ03015562.1-igkv |(33603, 33903)|2.91369092072|(1.000,0.934,0.997)|-1
----ARCDIQMTQSPSSLSASVGDRVTITCRASQGIR------NDLGWYQQKPGKAPKLL
IY----A--AS---SLQSGVPSRFSGSGS--GTDFTLT------ISSLQPEDFATYYCLQ
DYNYS--
>V196RF-AACZ03015564.1-igkv |(7726, 8026)|2.99392000218|(1.000,0.996,0.998)|-1
----TRCDIQMTQSPSSLSASVGDRVTITCRASQSIS------NSLAWYQQKPGKAPKLL
IY----A--AS---RLESGVPSRFSGSGS--GTDYTLT------ISSLQPEDFATYYCQQ
YYSTP--
>V197RF-AACZ03015754.1-igkv |(14686, 14986)|2.96696034001|(0.982,0.990,0.996)|-1
----ARCDIQVTQSPSSLSASVGDRVTITCRTSQGIS------NGLSWYQQKPGQAPTLL
IY----A--AS---SLQSGIPSRFSGSGS--GTDFTLT------ISSLQPEDVATYYCLQ
DYTTP--
>V199RF-AACZ03016143.1-igkv |(754, 1054)|2.68286640677|(0.951,0.832,0.955)|-1
----ARCAIQMTQPPSSLFASVGDSVTITCRASQSV--------TNHWYQQKPGKAPKLL
IY----R--VS---SLQMGVPSRFSGSGS--GTDFTLT------ISSLQPDDVATYYCQQ
EYTVGVT
>V201RF-AACZ03095321.1-trdv |(4778, 5084)|2.12567362895|(0.773,0.615,0.948)|-1
---RGMLCDKVTQSSPDQTVASGSEVVLLCTYDAV-----YSNPDLFWYRIRPDYSFQFV
FYGDNSR--SQAADFTQGRFSVKHILT----QKAFHLV------ISPVRTEDSATYYCAF
-------
>V202RF-AACZ03098097.1-ighv |(6348, 6654)|2.85001715843|(0.969,0.986,0.910)|-1
-----HSQVQLVQ-SGAEVKKLGASVKVSCKASGYTF-T---DYFIHWVQQAPGQGLEWM
GWINPN-S-GGT--NYAQKFQSRVTMTRNTSISTAYME------LSRLRSDDTAVYYCAR
-------
>V204RF-AACZ03098100.1-ighv |(12261, 12570)|2.88094828116|(0.986,0.994,0.919)|-1
----VLSQVQLQE-SGPGLVKPSETLSLTCAVSGGSI-S-S-SNWWSWVRQPPGKGLEWI
GEIYHS---GSP--NYNPSLKSRVTISVDKSKNQFSLK------LSSVTAADTAVYYCAR
-------
>V205RF-AACZ03098100.1-ighv |(19369, 19678)|2.95585291224|(0.995,0.967,0.997)|-1
----AHSQVQLVQ-SGAEVKKPGASVKVSCKASGYTF-T---SYAMHWVRQAPGQRLEWM
GWINTG-N-GNT--KYSQKFQGRVTITRDTSASTAYME------LSSLRSEDTAVYYCAR
-------
>V207RF-AACZ03127313.1-iglv |(14865, 15172)|2.76881350303|(0.934,0.892,0.951)|-1
----SWANFMLTQ-PHSVSESPGQTVTISCTRSSG---SIA-SDYVQWYQQRPGSAPTTV
IY----E--DN---RRPSGVPDRFSGSIDSSSNSASLT------ISGLKTEDEADYYCQS
YDSS---
>V209RF-AACZ03127321.1-iglv |(54420, 54720)|2.59817583335|(0.907,0.852,0.860)|-1
----SLSQLVLTQ-SPSASASLGASVKLTCTLSSG---H--SSYAIAWHQQQPEKGPRYL
MKLNSDG--SH---SKGDGIPDRFSGSSSG--AERYLT------ISSLQSEDEADYYCQT
W------
>V210RF-AACZ03127321.1-iglv |(122715, 123024)|2.65541477313|(0.891,0.950,0.839)|-1
----VDSQTVVTQ-EPPFSVSPGGTVTLTCGLSSG---SVSTSYYPSWYQQTPGQAPRTL
IY----S--TN---TRSSGVPGRFFGSII--GNKAALT------ITGAQADDESDYYCLL
YMGSGI-
>V211RF-AACZ03151873.1-igkv |(7769, 8069)|2.90177334931|(0.979,0.960,0.965)|-1
----ARCDIQMTQSPSSLSASVGDRVTITCRASQGIN------NNLNWYQQKPGKTPKLL
IY----A--AS---SLQSGIPSRFCDSGS--GTDYTLT------ISSLQPEDFATYYCQQ
SDGTP--
>V212RF-AACZ03151911.1-igkv |(7475, 7775)|2.8744775125|(0.989,0.989,0.917)|-1
----ARCDIQMTQSTSSLSASVGDRVTITCRASQGIS------NNLNWYQQKPGKTPKLL
IY----A--AS---SLQSGILSRFSDSGS--GTDYTLT------ISSLQPEDFAAYYCQQ
SDSTP--
>V215RF-AACZ03171149.1-trav |(1638, 1925)|2.54592685516|(0.811,0.884,0.912)|-1
----VSSEDKVVQSPLSLVVHEGDTVTLNCSYEVT-----N-FQSLLWYKQEK-KAPTFL
FMLTSSG--IE---KKSGRLSSILDKK----ELF-SIL------NTATQTGDSAIYLCAV
E------
>V216RF-AACZ03171512.1-trav |(590, 893)|2.74536703348|(0.951,0.874,0.944)|-1
----PGIAQKITQTQPGMFVQEKEAVTLDCTYDTS-----DPSYGLFWYKQPSSGEMIFL
IYQGSYD--QQN--ATEGRYSLNFQKA----RKSANLV------ISASQLGDSAMYFCAV
RE-----
>V218RF-AACZ03172648.1-ighv |(10152, 10459)|2.97140816598|(0.994,0.982,0.996)|-1
----AQCEVQLVE-SGGGLVQPGGSLRLSCAASGFTF-S---NHYTSWVLQAPGKGLEWV
SYISGD-S-GYT--NYADSVKGRFTISRDNAKNSLYLQ------MNSLRAEDTAVYYCV-
-------
>V219RF-AACZ03172650.1-ighv |(24637, 24943)|2.98670803341|(0.992,1.000,0.995)|-1
----VQCEVQLVQ-SGGGLVQPGGSLRLSCAGSGFTF-S---SYAMHWVRQAPGKGLEWV
SAIGTG---GGT--YYADSVKGRFTISRDNAKNSLYLQ------MNSLRAEDMAVYYCAR
-------
>V221RF-AACZ03177116.1-iglv |(1182, 1492)|2.94912281803|(0.996,0.972,0.984)|-1
----SWAQSALTQ-PASVSGSPGQSITISCTGTSS---DVGGYNAVSWYQQHPGKAPKLM
IY----D--VN---KRPSGVSNRFSGSKS--GNTASLT------ISGLQAEDEADYYCSS
YRSGGT-
>V222RF-AACZ03178854.1-igkv |(8334, 8634)|2.94329855551|(0.997,0.956,0.997)|-1
----ARCDIQMTQSPSSLSASVGDRVTITCWASQGIS------NNLNWYQQKPGKTPKLL
IY----A--AS---SLQSGIPSRFSDSGS--GTDYTLT------ISSLQPEDFATYYCQQ
SDSTS--
>V223RF-AACZ03179013.1-igkv |(41180, 41480)|3.0|(1.000,1.000,1.000)|-1
----ARCDIQMTQSPSSLSASVGDRVTITCRASQGIS------NNLNWYQQKPGKTPKLL
IY----A--AS---SLQSGIPSRFSDSGS--GTDYTLT------ISSLQPEDFATYYCQQ
SDSTP--
>V229RF-AACZ03179806.1-igkv |(3188, 3488)|2.95150296661|(0.997,0.960,1.000)|-1
----ARCDIQMTQSPSSLSASVGDRVTITCRASQGII------NNLNWYQQKPGKTPKLL
IY----A--AS---SLQSGIPSRFSDSGS--GTDYTLT------ISSLQPEDFATYYCQQ
SDSTP--
>V230RF-AACZ03183442.1-igkv |(591, 891)|2.9141802388|(0.978,0.972,0.965)|-1
----ARCDIQMTQSPSSMSASVGDRVTITCRASQGIN------NNLNWYQQKPGKTPKLL
IY----A--AS---SLQSGIPSRFCDSGS--GTDYTLT------ISSLQPEDFATYYCQQ
SDGTP--
>V231RF-AACZ03191230.1-iglv |(228, 538)|2.90790891268|(0.993,0.989,0.938)|-1
----SWAQSALTQ-PPSVSGSPGQSVTISCTGTSS---DVGGYNYVSWYQQHPGTAPKLM
IY----D--VS---KRPSGVPDRFSGSKS--GNTASLT------ISGLQAEDEADYYCCS
YAGSYS-
>V0RF-AGCE01061995.1-trbv |(4895, 5202)|2.68972913391|(0.944,0.960,0.834)|1
-----PVTAGVTQTPKFQVLKSGQSMTLQCAQDMN-------HDGMYWYRQDPGMGLRLI
HYSVGEG--T----TAKGEVPDGYNVSRSN-TKDFPLR------LEAAAPSHTSVYFCAS
SDSTV--
>V1RF-AGCE01061995.1-trbv |(16809, 17122)|2.67944252646|(0.914,0.928,0.853)|1
-----PLDSAVSQTPKYLVTQMGKKESLKCEQNLG-------HDTMYWYKQDSKKLLKIM
FIYNNK---EPI--LNETV-PNRFSPESPD-KAHLNLH------IESLELGDSAVYFCAS
SQDTALQ
>V4RF-AGCE01061995.1-trbv |(36451, 36748)|2.54258078925|(0.924,0.956,0.764)|1
-----PVNAGVTQTPKFQVLKTGQSITLQCAQDMN-------HDRMYWYRQDPGMGLRLI
HYSVGEG--T----TAKGEVPDGYKVSRSN-TKDFPLR------LEAAVPSQTSMYFCAS
SD-----
>V9RF-AGCE01061998.1-trbv |(1696, 1993)|2.51337713709|(0.934,0.769,0.915)|1
-----HGDAEITQSPRHKGTETGRQVTLKCHQTWN-------HNYMYWYRQDLGHGLRLI
HYSYGVQ--D----INKGEVSDGYVASRSN-LEDFPLT------LESALSSQTSVYFCAS
SD-----
>V11RF-AGCE01062000.1-trbv |(15550, 15847)|2.51025169473|(0.924,0.779,0.892)|1
-----HGDAEITQSPRHKVTKTRRQVTLKCHQTWN-------HNYMYWYRQDLGHGLRLI
HYSVAAD--N----TEKGEVSHGYVVSRSN-TEDFPLT------LESATHSQTSVYFCAS
SD-----
>V13RF-AGCE01062002.1-trbv |(427, 734)|2.56952354781|(0.874,0.919,0.804)|1
-----PVNAGVTQTPKFQVLKKGQSMTLQCAQDVN-------YDCMYWYRQDPGMGLRLI
YYSVDEG--I----TDKGEVHHGYNVSRSN-REDFPLR------LEAAALFQTSVYFCAI
SASTV--
>V18RF-AGCE01062008.1-trbv |(6797, 7094)|2.46284861804|(0.835,0.760,0.916)|1
-----SVAAGVIQYPRHLIKEKRKTAILKCYPIPG-------HDTVYWYQQGPGQGLQFL
ISYYEK---TQR--DKGSI-PDRFTAQQFS-DYHSELN------MSSLELGDSALYLCAS
SL-----
>V19RF-AGCE01062009.1-trbv |(1447, 1744)|2.67873523732|(0.926,0.924,0.851)|1
-----HMDGRITQSPRHKVTETGTPVALRCHQTEN-------HRYMYWYRQDLGHGLRLI
YYSYGVK--D----ISKGEVPDGYNVSRSN-TEDFPLT------LESTTGSQTSVYFCAS
SD-----
>V20RF-AGCE01062009.1-trbv |(16503, 16803)|2.63986278323|(0.957,0.890,0.853)|1
-----HTDAGVIQSPQHKMTEMGQEVTLRCEPISG-------HTQLFWYRQTVMRGLELL
TYFNNE---NLI--DDSGMPKDRFSAQMPN-ASFSTLK------IQPSEPGDSAVYFCAS
SL-----
>V22RF-AGCE01062009.1-trbv |(38765, 39065)|2.53651204366|(0.884,0.902,0.788)|1
-----HTAAGVTQFPSHRVIEKGQAVTLRCDPISG-------HEYLYWYRRVMGKEIKFL
IYFLRDS---KQ--DESGMPNHRFSAERTG-GTNSTLK------VQSAELEDSGIYFCAS
SL-----
>V39RF-AGCE01134600.1-igkv |(15938, 16236)|2.75171268352|(0.959,0.870,0.954)|1
-------DIVMTQTPLSLSVTPGKPASIVCRSSQSLFDSEDGNTYLNWYLQKPGQSPQLL
IY----D--AS---THASGVPDRFSGSGS--GTDFTLK------ISRVEAEDVGVYYCMQ
A------
>V41RF-AGCE01134600.1-igkv |(34924, 35224)|2.90042849428|(0.954,0.986,0.965)|1
----TRCDIQMTQSPSSLSASVGDKVTITCQASQGIN------SWLAWYQQKPGKAPRLL
IY----A--AS---SLQTGIPSRFSGSGS--GTHYTLT------ISSLQPDDFATYYCQQ
TYSTP--
>V42RF-AGCE01134600.1-igkv |(45692, 45992)|2.91242849428|(0.958,0.969,0.990)|1
----ARCDIQMTQSPTFLSASVGDRVTITCQASQSIG------SALAWYQQKPGKATRLL
IY----A--AS---SLQSGVPSRFSGSGS--GTDFTLT------ISSLQPDDFATYYCQQ
YSSFP--
>V43RF-AGCE01134602.1-igkv |(4964, 5279)|2.80008082054|(0.963,0.921,0.928)|1
----SSGDIVMTQTPLSLSVTPGEPASISCRSSQSLLH-SNGNTYLHWFLQKPGQSPQRL
IY----R--VS---NLASGIPDRFSGSGS--GTDFTLK------ISRVEAEDIGVYYCVQ
SIQTP--
>V46RF-AGCE01134604.1-igkv |(11428, 11728)|2.81870293477|(0.995,0.978,0.890)|1
----TRCDTQMTQSPSSLSASVGDRVTITCRASQSIS------NWLAWYQQKPGQVPKLL
IY----K--AS---TLQSGVPSRFSGSGS--GTDFTLT------ISSLQPEDVATYYCQK
CNSAP--
>V47RF-AGCE01134604.1-igkv |(23700, 24015)|2.7353003786|(0.988,0.882,0.925)|1
----SSGDIVMTQTPLSLPVTPGEPASISCRSSQSLLH-SNGNTYLSWYLQKPGQSPQLL
IY----K--VS---NRASGVPDRFSGSGS--GTDFTLK------ISRVEAEDVGVYYCMQ
DTKTP--
>V51RF-AGCE01134610.1-igkv |(3122, 3422)|2.95674002125|(0.982,0.989,0.986)|1
----TRCDIQMTQSPSSLSASVGDKVTITCQASQGIS------NNLAWYQQKTGKAPRLL
IN----E--AS---SLESGVPSRFSGSGS--GTDFTLT------ISSLQPEDSATYYCQQ
HNSYP--
>V52RF-AGCE01134612.1-igkv |(802, 1102)|2.98012824764|(0.987,1.000,0.994)|1
----ARCDIQMTQSPSSLSASVGDKVTITCQASQGIN------NYLAWYQQKPGKAPRLL
IY----Y--AS---SLDSGVPSRFSGSGS--GADYTLT------ISSLQPEDFATYYCQQ
YNSYP--
>V53RF-AGCE01134613.1-igkv |(4841, 5141)|2.98561205453|(0.991,1.000,0.995)|1
----ARCDIQMTQSPSSLSASVGDKVTITCQASQGIN------NYLAWYQQKPGKAPRLL
IY----Y--AS---SLQSGVPSRFSGSGS--GADYTLT------ISSLQPEDFATYYCQQ
YSSYP--
>V54RF-AGCE01134614.1-igkv |(11222, 11522)|2.92018588966|(0.976,0.950,0.999)|1
----ARCDIQMTQSPSSLSASVGDKVTITCQASQGIS------KWLAWHQQKPGKAPKLL
IY----E--AS---KLQSGVPSRFSGSGS--GTDFTLT------ISSLQPEDFATYYCQQ
YNSNP--
>V55RF-AGCE01134616.1-igkv |(2365, 2665)|2.71736097151|(0.986,0.930,0.868)|1
----STGQIVMTQSPATLSLSPKETATLSCRASQSVS------SYLAWYQQKPGQAPRLL
IY----G--AS---TRATGIPDRFSGSGS--GTEFTLT------ISSLEPEDFAVYYCQQ
YNNRP--
>V57RF-AGCE01134616.1-igkv |(27065, 27365)|2.96898000014|(0.990,0.991,0.988)|1
----ARCDIQMTQSPSSLSASVGDTVTITCQASQGIS------KWLAWYQQKPGKAPKLL
IY----D--AS---KLQSGVPSRFSGSGS--GTDFTLT------ISSLQPEDFATYYCQQ
HNSNP--
>V61RF-AGCE01147749.1-ighv |(15994, 16303)|2.87532662409|(0.989,0.974,0.928)|1
----VHSQVQLVQ-SGAEVKKPGASMKVSCKASGYTF-T---DYYMNWVRQAPGKGLEWM
GDIDPE-N-GET--SYAQKFQGRVTMTADTSTSTAYME------LRSLRSEDTAVYYCAR
-------
>V64RF-AGCE01147864.1-ighv |(20911, 21220)|2.98594028297|(0.988,1.000,0.999)|1
----VQCEVQLVE-SGGGLVQPGGSLRLSCAASGFTF-S---SYWMSWVRQAPGKGLEWV
SAINTD--GSST--YYADAVKGRFTISRDNAKNSLYLQ------MNSLRAADTAVYYCAR
-------
>V70RF-AGCE01147874.1-ighv |(2400, 2706)|2.91996000066|(0.974,0.971,0.975)|1
----VQCEVQLVE-SGGGLAKPGGSLRLSCAASGFTF-S---SYAMSWVRQAPGKALEWV
SAIGT--G-GST--YYADAVKGRFTISRDNAKNSLFLQ------MNSLRAEDTAVYYCAR
-------
>V72RF-AGCE01147944.1-ighv |(862, 1171)|2.96323565456|(0.996,0.970,1.000)|1
----VQCEVQLVE-SGGGLAKPGGSLRLSCAASGFTF-S---SYYMDWVRQAPGKALEWV
SAISTD--GSGT--SYADSVKGRFTISRDNAKNSLYLQ------MSSLRAEDTAVYYCAT
-------
>V75RF-AGCE01148057.1-ighv |(4263, 4572)|2.91496196|(0.986,0.942,0.995)|1
----VQCEVQLVE-SGGGLAKPGGSLRLSCAASGFVF-S---SYHMHWVRQAPGKGLEWV
SFISSD--GGST--YYADSVKGRFTISRDNAKNSLYLQ------MSSLRAEDTAVYYCAR
-------
>V76RF-AGCE01148067.1-ighv |(2196, 2505)|2.91572588623|(0.995,0.986,0.945)|1
----VQSQVQLVQ-SGAEVKKPGASVKVSCKASGYTF-T---SYYMNWVRQAPGQGLEWM
GWINPY-N-GNT--GYAQKFQGRVTMTVDKSTSTAYME------LSSLRSEDTAVYYCAK
-------
>V88RF-AGCE01026522.1-trav |(15303, 15602)|2.42403157652|(0.821,0.742,0.957)|-1
----VSSKQEVTQIPAALSVPEGESLVFNCSFTDS-----A-IYYLQWFRQDPGKGLTSL
LLIQSSQ--RE---QTSGRLNASLDKS----SRYSTLH------IAASQPGDSATYLCAV
RHS----
>V94RF-AGCE01026527.1-trav |(1820, 2116)|2.47164005313|(0.822,0.831,0.819)|-1
-----VNSQQGEEEPQTLSIQEGENAIINCSYKTS-------ITSLQWYRQDSNRGLTQL
ILIRSNE--RE---KHSGRLRFMLDTS----MKSSSLF------IAAAQAADTAAYFCAT
EAQC---
>V95RF-AGCE01026527.1-trav |(7054, 7345)|2.56249299031|(0.891,0.940,0.785)|-1
----RTYGDSVTQTEGPVTLPEGAALTLNCTYQSS-----YS-VFLFWYVQYLDKEPQLL
LKSS-E---NQE--TDSRGFQASHVKS----DSSFRLE------KPSVQLSDSAVYYCAL
R------
>V96RF-AGCE01026527.1-trdv |(10273, 10576)|2.37347314171|(0.765,0.781,0.919)|-1
----SSMAQKVTQAQTEISVVEKEDVTLDCVYETS-----DTTYYLYWYKQPSAREMIFL
IRQNSFN--EQN--EISGRYSGNFQKS----TSSFSLT------IAASQVIDSAVYFCAL
SE-----
>V97RF-AGCE01026529.1-trav |(3178, 3469)|2.54580705574|(0.869,0.783,0.947)|-1
---VWSQQKEVEQNPGSLSVPEGAIASLSCTYSNR-----A-FQYFMWYRQYSRKGPELL
TFIYSSD--KK----EDGRFTAQLNKS----SQYISLF------IRDSQPSDSATYLCAM
-------
>V99RF-AGCE01026530.1-trav |(8602, 8899)|2.40270771053|(0.943,0.890,0.737)|-1
----DARAQSVTQPDIHITVSEGASLELRCNYSYG-----AT-PYLFWYVQSPGQGLQLL
LRYFSGD--TLV--QGIKGFEAEFKRS----QSSFNLR------KPSVHWSDAAEYFCAV
S------
>V100RF-AGCE01026530.1-trav |(21106, 21396)|2.35328680544|(0.749,0.802,0.892)|-1
-----VNGENVEQHPSTLSVQVGDSSVINCTYSDS-----A-SNYFPWYKQELGKGPRLI
IDIRSNV--DK---RKDGRMTVLLNKA----AKHFSLH------ITDTQPGDSALYFCAA
G------
>V101RF-AGCE01026530.1-trav |(40762, 41065)|2.54720023281|(0.831,0.858,0.866)|-1
---VWS-QQKVEQNSGPLNVPEGVIASLNCTYSDR-----G-SQSFYWYRQYPGKSPELL
MSVYSSG--N-----EDGRFTAQLNRA----SQYVSLL------IRDSQLSDSATYLCAV
STRCSP-
>V103RF-AGCE01026531.1-trav |(478, 766)|2.61137926632|(0.941,0.789,0.974)|-1
---VWSQQKEVEQDPGPFNVPEGTTVAFNCTYSNS-----A-SQYFFWYRQDPRKGPKLL
MSVYSSG--N-----EDGRFTAQLNRA----SQYVSLL------IRDSQLSDSATYLCAV
-------
>V105RF-AGCE01026534.1-trav |(23755, 24045)|2.81732993528|(0.920,0.944,0.963)|-1
----MSSGEDVEQS-RFLSVQEGDSVVMNCTYTDS-----S-SSYLYWYKQEPGASLQLL
AYILSNT--DM---KQDQRLTVQLDKK----NKHLSLH------VAEAQTGDSAIYFCAE
S------
>V112RF-AGCE01112648.1-iglv |(492, 795)|2.80079308684|(0.950,0.932,0.923)|-1
----FVTSYELTQ-PHSVSVAPGQTARITCGG------NNIGGKYTYWYQQKSGQSPVLV
IY----R--DN---NRPSGIPERFSGSNS--GNTATLT------ISGVQAGDEADYYCQV
WDSSSNH
>V113RF-AGCE01112648.1-iglv |(8719, 9022)|2.74261048703|(0.922,0.880,0.951)|-1
----SVVSSAMTQ-EPAVSVALGQTARITCQG------GGIGTYSANWYQQKPGQAPVLV
IY----D--NN---NRPSGIPDRFSGSSS--GNTASLT------ITGAQVEDEADYYCGS
WDSSGTH
>V115RF-AGCE01112674.1-iglv |(4938, 5247)|2.62604567776|(0.954,0.823,0.920)|-1
----SWAQSVLTQ-PPSASGAPGQRVTISCSGSS----SNIGNNYANWYQQLPGKAPKLL
IY----G--NS---NRPSGSPDRFSGSKS--DTSATLA------ITGLQSADEADYYCET
WDSSLNA
>V118RF-AGCE01134619.1-igkv |(32675, 32987)|2.77068548976|(0.909,0.905,0.973)|-1
----TYGDIVMTQSPGSLAVSLGERVTINCKSSQSLLS--SSKNYLAWHQQKPGQAPKQI
IV----W--AS---TRVSGVPDRYSGSGS--GTDFTLT------ISSLQAEDVAVYYCQQ
FYSAP--
>V121RF-AGCE01135277.1-iglv |(31, 340)|2.80007575588|(0.915,0.947,0.946)|-1
----CWAQSVLTQ-PPSVSGNPGQRVTISCSGSSS---NIG-SSYVNWYQQLPGTAPKLL
IY----D--SN---QRPSGVSDQFSGSTS--GNSASLT------ITGLQSADEADYYCQS
YDSNLKA
>V125RF-AGCE01147919.1-ighv |(4216, 4525)|2.96449912241|(0.997,0.998,0.972)|-1
----AHSQVQLVQ-SGAEVKKPGASVKISCKASGYTF-T---SYSMHWVQQAPGQGLEWI
GYINTN-T-GGT--NYAQKFQGRVTMTRDTSTSTAYME------LSSLKSEDTAVYYCAR
-------
>V126RF-AGCE01147923.1-ighv |(7327, 7634)|2.91415712206|(0.969,0.959,0.988)|-1
----VLSQVQLQE-SGPGLVKPSDTLSLTCAVSGYSI-S-S-GYWWSWIRQPPGKALEWI
GSIYYS---GSA--YYNPSLKSRVTISTDMSKNQFSLR------MSSVTAADTAVYYCA-
-------
>V128RF-AGCE01147939.1-iglv |(7498, 7807)|2.6132359971|(0.865,0.951,0.831)|-1
----VDSETVVTQ-EPSYLVSPGGTVTLTCGLSSG---SVSTSHYPSWYQQTPGQAPQML
IY----S--TN---TRPSGVPDRFSGSIL--GNKAALT------IKGAQADDETDYYCML
YMGSGI-
>V131RF-AGCE01148188.1-ighv |(110, 419)|2.90024777128|(0.982,0.936,0.991)|-1
----VQCEVQLVE-SGGGLAKPGGSLRLSCAASGFTF-S---DYWMGWVRQAPWKGLEWV
GEINHN-G-GST--YYADSVKGRFTISRDNAKNSLYLQ------MNSLRAEDTAVYYCAR
-------
>V132RF-AGCE01148199.1-ighv |(2012, 2325)|2.84436776139|(0.969,0.972,0.915)|-1
----VQCEVQLVE-SGGGLAQPGGSLRLSCAASGFTF-S---NYWMNWVCQAPGKGLEWV
GRIKSKADGGTA--EYTASVKGRFTISRDDSKNMLYLQ------MRSLKTEDTAVYYCA-
-------
>V134RF-AGCE01148386.1-ighv |(210, 517)|2.95275601537|(0.988,0.983,0.982)|-1
----VQCEVQLVE-SGGGLVKPGGSLRLSCAASGFTL-S---EYGMHWVRQAPGKGLEWV
SFISYN--GGYI--HYADSVKGRFTISRDNAKNSLYLQ------MSSLRAEDTAVYYCA-
-------
>V0RF-JZKE01005121.1-trbv |(3942, 4254)|2.50124044791|(0.799,0.861,0.887)|1
-----LVETKVTQTPRHLVKRTGEKVLLKCSQDMD-------HERMFWYRQDPGLGLRLI
YFSYDVD--N----DEKGDVSEGYSASRKK-KEYFPLV------LESASTNQTSVYLCAS
RYPQRCT
>V5RF-JZKE01218258.1-igkv |(171021, 171321)|2.96086491212|(0.997,0.998,0.969)|1
----ARCDIQMTQSPSSLAASLGDTVTITCQASQGIS------NYLSWYQQKPGQSPKIL
IY----G--AS---NLETGVPSRFSGSGS--GTDFTLT------ISSLQPEDFATYYCLQ
SYNYP--
>V10RF-JZKE01244686.1-ighv |(3631, 3937)|2.93749304411|(0.972,0.976,0.991)|1
----VQCEVQLVE-SGGGLVQPGGSLTLSCVASGFTF-S---SYAMCWVRQAPGKGLEWV
SAIGSG---GGT--YYADAVKGQFTISRDNSKNTLSLQ------MKSLQAEDTAMYYCAR
-------
>V12RF-JZKE01244709.1-ighv |(12, 321)|2.88469237975|(0.970,1.000,0.926)|1
----VQCEVQLVE-SGGGLVQPGGSLRLSCAVSGFTV-S---NYYMSWVRQAPGKGLEWV
SYIYSD-D-GDT--NYADAVKGRFTTSTDNGKNMLYLQ------MNSLRTEDTAVYYCAR
-------
>V13RF-JZKE01244710.1-ighv |(1079, 1388)|2.97174002125|(0.987,0.991,0.994)|1
----AQCEVQLVE-SGGGLVQPGGSLTLSCAASGFTF-S---DYYMSWVRQAPGKGLEWV
SRISNT-G-GST--WYADAVKGRFTISRDNSKNTLSLQ------MNSLRAEDTAVYYCAR
-------
>V14RF-JZKE01244715.1-ighv |(308, 614)|2.95096052424|(0.978,0.980,0.994)|1
----VRCEVQLVE-SGGGLVQPGGSLTLSCAASGFTF-S---SYAMHWVRQAPGKGLEWV
SRINSG---GST--SYADAVKGRFTISRDNSKNMLSLQ------MNSLRSEDTAVYYCTR
-------
>V19RF-JZKE01249933.1-iglv |(3726, 4036)|2.59621809645|(0.937,0.909,0.813)|1
----SLSQPVLTQ-PPSLSASPGASARLTCTLSSG---FSVGSYAIYWYQQKPGSPPRYL
LSYYSDS--DK---HQGSGVPRRFSGSKDASANVGILH------ISGLQPEDEADYYCMV
-------
>V21RF-JZKE01249944.1-iglv |(1831, 2141)|2.82976093375|(0.973,0.897,0.983)|1
----SLANVVLTQ-PSSVSGSPGQKVTISCTRSSG---NIG-DNYVHWYQQRPGSAPTTV
IY----A--DD---KRPSGVPDRFSGSIDSSSNSASLT------ISGLQSEDEADYYCQS
YGSSA--
>V27RF-JZKE01249957.1-iglv |(3969, 4267)|2.689742295|(0.952,0.868,0.906)|1
-----SVASQLTQ-VPAVSVALGQTARITCQG------DSLSSYYPNWYQQKPGQAPVLV
IY----G--NS---NRPSGIPERFSSSDS--GTTATLT------ISGAQAGDEADYYCGS
YAGSDT-
>V31RF-JZKE01249959.1-iglv |(447, 745)|2.74312851976|(0.909,0.886,0.961)|1
----SVASYELTQ-PPSVSVSPGQTARITCGG------NNIGNKYAYWHQQKAGQAPVLI
IY----S--DS---NRPSGIPERFSGSNS--GNTATLT------ISGTQAGDEADYYCQV
WDGSN--
>V32RF-JZKE01255160.1-ighv |(7108, 7423)|2.94291054075|(0.969,0.991,0.986)|1
----VQCEVQLVE-SGGGLVQPGGSLTLSCAASGFSF-S---NYWMHWVRQAPGKGLEWV
SSIGND---GST--SYADAVKGRFTISRDNDKNTLSLR------MNSLRAEDTAVYYCAR
ETV----
>V33RF-JZKE01296733.1-igkv |(5866, 6179)|2.83580866856|(0.939,0.942,0.956)|1
----SSGDIVMTQTPLSLSVTPGESASISCTASQSILH-TDGNTYLNWLLQKPGQPPKRL
IY----K--IS---NRDSGVSDRFSGSGS--GTDFTLE------ISRVEAEDVGVYYCMQ
ASYY---
>V34RF-JZKE01097728.1-igkv |(2698, 3010)|2.77714391427|(0.966,0.871,0.976)|-1
----ACGDIVMTQSLRSLAVSPGERVTIDCKSSQSLLS--NNKNYLAWHQQKPGQAPKLL
IY----W--AS---TRASGVPDRFSGSGS--GTDFTLT------ISSVQAEDVAVYYCQQ
YHSTP--
>V37RF-JZKE01143868.1-trav |(15192, 15493)|2.46276103186|(0.873,0.791,0.832)|-1
----SSVAQTVTQSQPEMSVQEAGTVTLDCTYATS-----DSNYYLFWYKQPPSRQMILI
IRQEAYK--QQN--ATENRFSVNFQKA----AKSFSLE------ISDSQLEDAAMYFCAF
M------
>V38RF-JZKE01143869.1-trav |(6274, 6564)|2.56124935941|(0.838,0.901,0.838)|-1
----VSSEDKVIQSPSSLAVHEGDSATLTCNYEVS-----Y-FQSLQWYKQEK-NAPTFL
FTLTSSG--IE---KKSGRLSSILDNK----ELLSTLN------ITATQTRDSAIYFCAV
E------
>V46RF-JZKE01143873.1-trdv |(6157, 6456)|2.12544361764|(0.671,0.736,0.793)|-1
----STVAQKVTQYQATTSMTEGQAVTLNCQYETS-----STTYFICWYKQLPSKEMIFL
LRQGSTS--QN---AKDGRYSVNFRKE----AKSINLT------ISALRLEDSAKYFCAL
WD-----
>V48RF-JZKE01143874.1-trdv |(2471, 2770)|2.1006756763|(0.673,0.696,0.773)|-1
----STVAQKVTQAQTATTRTVGQAVTLNCQYEASW----SS-YYIYWYKQLPSNEMIFL
LRQYSGD--Q-N--AKNGRYSINFQKE----AKSIDLT------ISALRLEDSAKYFCAL
WD-----
>V50RF-JZKE01143890.1-trav |(1103, 1400)|2.76624535942|(0.906,0.969,0.907)|-1
----RSNGDSVTQTEGTVTLPEGAPVILNCTYETT-----YSVSYLFWYVQYLNQSPQLL
LKSSTE---NQR--GENRGFQANLVKS----DKSFHLE------KSSLRMSDSAVYYCAL
S------
>V52RF-JZKE01143891.1-trav |(8677, 8980)|2.53426503785|(0.817,0.838,0.937)|-1
----PSMAQKVTQAQPEISVVEKESVTLDCVYETR-----DPTYYLFWYKQPPSGEMIFL
IRQDSFN--EKN--ETKDRYFLNLQKS----TSSISLT------ITASQLMDSAVYFCAL
RE-----
>V53RF-JZKE01143893.1-trav |(6613, 6900)|2.54791460897|(0.828,0.836,0.912)|-1
-----VNSQQGEENPQALSIQEGENATINCSYKS------S-ISNLQWYRQDSGRGLTLL
ILIRANK--RE---EHHGRLTVTLNTS----IKSSSLI------ITASCAADSATYFCAT
D------
>V55RF-JZKE01143895.1-trav |(15624, 15933)|2.70879033782|(0.921,0.873,0.924)|-1
----AGIAQKVTQSQPAMSVQEKEAVTLDCTYDTSTS---VTSYTLFWYKQPSSGEMILL
IRQDSYN--QQN--ATEGRYSLNFQKA----SKSIKLV------ISASQVGDSAIYFCAL
SE-----
>V56RF-JZKE01143895.1-trav |(22481, 22772)|2.77683704999|(0.898,0.945,0.956)|-1
---VRSQQKEVEQTPESLSVSEGATASLNCTYSNT-----A-SQYFTWYRQYSGKGPELL
VSIYSNG--DK----EEERFTVHLNMA----SRYVSLL------IRDSQPSDSATYLCAV
-------
>V58RF-JZKE01143896.1-trav |(1244, 1537)|2.48837072237|(0.831,0.778,0.926)|-1
----VRGGENMGLHPPNLSVQEGDTSVINCTYSNS-----N-SDYFCWYKQEPGKGPQFI
MDIRSNK--DK---KQEGRFTILLNKM----AKHLSLH------IAGTQAGDSAAYLCAE
S------
>V59RF-JZKE01143896.1-trav |(8327, 8630)|2.59351899712|(0.911,0.820,0.896)|-1
----SGIAQKVTQVQPAMLVQEKEAVTLDCTYDTS-----DSRYTLFWYKQPSSGEMLLL
IRQDSYN--QQN--ATEGRYSLNFQKA----NKSIKLV------ISASQVGDSAIYFCAL
ME-----
>V60RF-JZKE01143896.1-trav |(15626, 15938)|2.59373359048|(0.884,0.961,0.800)|-1
---VRSQQKEVEQTPESLSVSEGATASLNCTYSNT-----A-SQYFAWYRQYSGKGPELP
VSIYSTG--DK---EEEGRFTVQLNKG----SRYVSLL------IRDSQPSDSATYLCAV
STQCSP-
>V61RF-JZKE01143902.1-trav |(453, 744)|2.79486400565|(0.931,0.936,0.928)|-1
---VRSQQKEVEQTPESLSVSEGATASLNCTYSNT-----A-SQYFAWYRQYSGKGPELL
VFIYSTG--DK----EEGRFTVQLNKA----SRYVSLL------IRDSQPSDSATYLCAV
-------
>V62RF-JZKE01143903.1-trav |(641, 935)|2.74655350692|(0.902,0.966,0.895)|-1
----RTHGDSVTQMEGQVTLSEEAFLTINCTYTAT-----GY-PALFWYVQYPGEGPQLL
LKATKA---NDK--GINKGFEATYKRE----TTSFHLE------KASVHESDSAVYYCAL
S------
>V63RF-JZKE01143910.1-trav |(6899, 7192)|2.34506530284|(0.817,0.700,0.941)|-1
----VSGKNQVEQGPQSLIIPEGENCTLQCNYTVS-----P-FNNLRWYKQETGRGPVSL
IIMNYSK--SK---ESNGRYTATLDAS----AKQSSLH------ITASQLSDSASYICVA
S------
>V67RF-JZKE01143910.1-trav |(57835, 58138)|2.59820963282|(0.932,0.790,0.956)|-1
----AGVAQKVTQSQPAMLVQEKEAVTLDCTYDTS-----DSSYGLFWYKQPSSGEMLLL
IRQDSYN--QQN--ATEGRYSLNFQKA----RKSIHLV------ISALQLGDSAIYFCAL
SE-----
>V70RF-JZKE01143915.1-trav |(12659, 12952)|2.68322232427|(0.866,0.925,0.916)|-1
----VSRGENVEQRPSTLHVQEGDTSVINCTYSDS-----A-SSYFPWYKQELGKGPQLF
IDIRSNL--DK---KQDQRITLLLNRM----TKHLSLH------IAATQPGDSAVYFCVA
S------
>V75RF-JZKE01143916.1-trav |(38882, 39172)|2.75782735083|(0.933,0.908,0.920)|-1
----ISRGEKVEQS-PFLSVQEGDSSVINCTYTES-----T-STYFYWYKQGPGEGPQLL
MTILSSM--DK---KQEQRLSVLLNKR----EKHLSLH------ISDTQPGDSAVYFCAV
S------
>V76RF-JZKE01143916.1-trav |(40477, 40765)|2.39168370422|(0.798,0.763,0.844)|-1
-----VNSQKIEQNPRALNIHEGETAAVTCNYTSY-----S-PAFLQWYRQDPERGLVFL
LLIRENE--GE---KQEGRLKVTFDTT----HKQSSFY------ITDSQPADSATYLCAA
-------
>V78RF-JZKE01143916.1-trav |(59581, 59872)|2.81661721661|(0.936,0.968,0.918)|-1
-----SHGDSVTQTDGQMLLTEGDSLIVNCSYETR-----QY-PALFWYVQYPGEGLQLL
LKAAKA---NDK--GINKGFEATYNRE----TTSFHLE------KASVHVSDSAVYYCAL
S------
>V80RF-JZKE01196378.1-trbv |(847, 1154)|2.44440906282|(0.877,0.752,0.876)|-1
-----HTDAGITQNPRFRVTETGKQVTLRCHQTDK-------YDYMYWYRQDLGRGLRLI
HYSYGVQ--R----TDKGEFSEGYNVSRSD-MEDFPLT------LESATPSQTSVYFCAI
SDSTA--
>V81RF-JZKE01235368.1-ighv |(1130, 1439)|2.96964084149|(0.995,0.977,0.999)|-1
----VQCQVQLVE-SGGGLVQPGGSLTLSCAASGFTF-S---SYWMYWVRQAPGKGLEWV
SSINYG-G-GST--YYADGVKGRFTISRDNSKNTLSLQ------MNSLRAEDTAVYYCAK
-------
>V82RF-JZKE01238797.1-iglv |(185, 497)|2.87167775008|(0.986,0.968,0.931)|-1
----SWAQSALTQ-PPSVSGAPGQTVTISCTGSSS---NIGGGYYASWYQQLPGSAPKLL
IY----Y--DS---DRPSGIPARFSGSKS--GSSASLT------ITGLQAEDEADYYCAA
WDTSLSG
>V83RF-JZKE01238797.1-iglv |(4422, 4732)|2.78636530313|(0.962,0.914,0.925)|-1
----SLANFVLTQ-PSSVSGSPGQKVTISCTRSSG---NIG-DNYVSWYQQRPGSAPTTV
IY----D--DN---QRPSGVPDRFSGSIDSSSNSASLT------ISGLQSEDEADYYCQS
YDSSA--
>V84RF-JZKE01238799.1-iglv |(2255, 2565)|2.79477190296|(0.962,0.906,0.941)|-1
----SLANFVLTQ-PSSVSGSPGQKVTISCTRSSG---NIG-SYYVHWYQQRPGSAPTTV
IY----N--DN---QRPSGVPDRFSGSIDSSSNSASLT------ISGLQSEDEADYYCQS
YDSSA--
>V85RF-JZKE01238800.1-iglv |(606, 916)|2.68511157583|(0.943,0.909,0.863)|-1
----SLSQPVLTQ-PPSLSASPGASARLTCTLSSG---FSVGSYAIYWYQQKPGSPPRYL
LSYYSDS--SK---HQGSGVPSRFSGSKDASANAGILH------ISGLQPEDEADYYCMA
-------
>V87RF-JZKE01255181.1-ighv |(445, 754)|2.97864005313|(0.989,0.992,0.998)|-1
----VQCEVQLVE-SGGGLVQPGGSLTLSCAASGFTF-S---DYYMHWVRQAPGKGLEWV
SYISSS-G-GST--YYADAVKGRFTISRDNSKNTLSLQ------MNSLRAEDTAVYYCVR
-------
>V88RF-JZKE01255182.1-ighv |(1026, 1335)|2.95937212748|(0.981,0.987,0.992)|-1
----VQCEVQLVE-SGGGLVQPGGSLTFSCAASGFTF-S---SYNMHWVRQAPGKGLEWV
SYISNT-G-GST--YYAEAVKGRFTISRDNSKNTLSLQ------MNSLRAEDTAVYYCAG
-------
>V89RF-JZKE01278248.1-ighv |(4833, 5139)|2.93783253448|(0.987,0.971,0.981)|-1
----VQCEVQLVE-SGGGLIQPGGSLTLSCAASGFTI-S---SYYMDWVRQASGKGLEWV
SAISS--G-GST--YYADAVKGRFTISRDNSKNTLSLQ------MNSLRAEDTAVYYCAR
-------
>V92RF-JZKE01278255.1-ighv |(2535, 2844)|2.96888400513|(0.992,0.987,0.990)|-1
----VQCEVQLVE-SGGGLVQPGGSLTLSCAASGFTF-S---SYWMYWVRQAPGKGLEWV
SSINSG-G-GST--YYADAVKGRFTISRDNSKNTLSLQ------MNSLRAEDTAVYYCAK
-------
>V93RF-JZKE01278267.1-ighv |(5092, 5401)|2.98068003481|(0.995,0.987,0.999)|-1
----VQCEVQLVE-SGGGLVQPGGSLRLSCAASGFTF-S---SYGMNWARQAPGKGLEWV
STINYD--GSST--SYADAVKGRFTISRDNSKNTIYLQ------MNSLRAEDTAVYYCAK
-------
>V94RF-JZKE01278268.1-ighv |(3308, 3617)|2.97432022844|(0.987,0.988,1.000)|-1
----VQCEVQLVE-SGGGLVQPGGSLTLSCVASGFTF-S---SYYMHWVRQAPGKGLEWV
SYINTA-G-GST--SYADAVKGRFTISRDNSKNTLSLQ------MNSLRAEDTAVYYCAR
-------
>V95RF-JZKE01278271.1-ighv |(48, 354)|2.97041612211|(0.985,0.990,0.996)|-1
----VQCEVQLVE-SGGGLAQPGGSLTLSCAASGFTF-S---NYGMHWVRQAPGKGLEWV
SAISSG---GST--YYADAVKGRFTISRDNSKNTLSLQ------MNSLRTEDTAVYYCAK
-------
>V96RF-JZKE01278271.1-ighv |(7402, 7711)|2.96006440553|(0.991,0.994,0.976)|-1
----VQCEVQLVE-SGGGLVQPGGSLTLSCAASGFTF-S---SYDMSWVRQAPGKGLEWV
AVIWAD--GSKQ--YYADSVKGRFTISRDNGKNMLYLQ------MNSLRAEDTAMYYCAS
-------
>V97RF-JZKE01278273.1-ighv |(24, 333)|2.85086319439|(0.969,0.932,0.956)|-1
----VQCEVQLVE-SGGGLVQPGGSLTLSCAASGFTF-S---SYVMYWFRQAPGKGLEWV
SRISSS-G-GST--SYADALKGRFTISRDNSKNTLSLQ------MNSLRAEDTAVYYCAK
-------
>V98RF-JZKE01278276.1-ighv |(456, 765)|2.9551802388|(0.983,0.996,0.977)|-1
----VQCEVQLVE-SGGGLVQPGGSLKLSCAASGFTF-S---SYGMNWVRQAPGKGLEWI
SHINYD-A-GST--YYADAVKGRFTISRDNSKNTLSLQ------MNSLKAEDTAVYYCAK
-------
>V99RF-JZKE01278277.1-ighv |(1432, 1741)|2.92174224752|(0.969,0.963,0.992)|-1
----VQCEVQLVE-SGGGLVQPGGSLTLSCAVSGFTV-S---SYGMNWVRQAPGKGLEWV
SYIYSD-G-GST--NYADAVKGRFTTSTDKSKNTLSLQ------MNSLRAEDTAVYYCAR
-------
>V101RF-JZKE01278602.1-ighv |(13, 322)|2.92975704508|(0.962,0.994,0.979)|-1
----VQCEVQLVE-SGGGLVQPGGSLTLSCAASGFTF-S---SYWMSWVRQAPGKGLEWV
STISHT-G-GST--YYADALKGRFTISRDNSKNTLSLQ------MNSLRTEDTAVYYCAR
-------
>V102RF-JZKE01278602.1-ighv |(4600, 4909)|2.8464900387|(0.961,0.939,0.949)|-1
----VQCEVQLVE-SGGGLVQPGGSLRLSCVASGFTF-S---SYVMYWFRQSPGKGLEWV
SRISSS-G-GST--SYADALKGRITISRDNSKNTLSLQ------MNSLRAEDTAVYYCAI
-------
>V103RF-JZKE01278605.1-ighv |(401, 710)|2.96560004313|(0.988,0.996,0.982)|-1
----VQCEVQLVE-SGGGLVQPGGSLTLSCAASGFTF-S---DYYMSWVRQAPGKGLEWV
SRISSD-G-TST--YYADAVKGRFTISRDNSKNTLSLQ------MNSLQAEDTAVYYCAR
-------
>V104RF-JZKE01278607.1-ighv |(3705, 4014)|2.97840068997|(0.984,0.996,1.000)|-1
----VQCEVQLVE-SGGGLVQPGGSLTLSCAASGFSF-S---SYWMHWVRQAPGKGLEWV
SYINSA-G-GST--YYADAVKGRFTISRDNSKNTLSLQ------MNSLRAEDTAVYYCAR
-------
>V105RF-JZKE01278609.1-ighv |(657, 966)|2.96379905705|(0.976,0.991,1.000)|-1
----VQCEVQLVE-SGGGLIQPGGSLTLSCAASGFSF-S---SYRMNWVRQAPGKGLEWI
SYISSG-G-GST--YYADAVKGRFTISRDNSKNTLSLQ------MNSLRAEDTAVYYCAR
-------
>V106RF-JZKE01278610.1-ighv |(3774, 4083)|2.9590935653|(0.978,0.984,0.999)|-1
----VQCEVQLVE-SGGGLVQPGGSLTLSCAASGFSF-S---SYDMSWVRQAPGKGLEWV
SYINYG-G-GST--SYADAVKGRFTISRDNSKNTLSLQ------MNSLRADDTAVYYCAS
-------
>V107RF-JZKE01278610.1-ighv |(12525, 12834)|2.85396931699|(0.967,0.952,0.939)|-1
----VHCEVQLVE-SGGGLVQPGGSLTLSCAASGFTV-S---SYCMSWVRQAPGKGLEWV
SYIYSD-G-GSR--NYADAVKGRFTTSTDNGKNTLYLQ------MNSLRAEDTALYYCAR
-------
>V108RF-JZKE01278611.1-ighv |(583, 892)|2.87975831648|(0.988,1.000,0.914)|-1
----VQCEVQLVE-SGGGLVQPGGSLRLSCVASGFTF-S---DYYMSWVRQAPGKGLEWV
LYIYSD-D-GDT--SYADAVKGRFTISTDNGKNMLYLQ------MNSLRAEDTAVYYCAR
-------
>V109RF-JZKE01278611.1-ighv |(6883, 7192)|2.9796404731|(0.985,0.997,0.999)|-1
----VQCEVQLVE-SGGGLVQPGGSLKLSCAASGFTF-S---SYGMNWVRQTPGKGLEWI
SYINSA-G-GST--SYADAVKGRFTISRDNSKNTLSLQ------MNSLRAEDTAVYYCAR
-------
>V110RF-JZKE01278614.1-ighv |(2171, 2477)|2.96310040488|(0.983,0.983,0.998)|-1
----VQCEVQLVE-SGGGLVQPGGSLTLSCAVSGFTV-S---SYDMSWIRQASGKGLEWV
SYISYG---GST--YYADAVKGRFTISRDNGKNTLSLQ------MNSLRTEDTAVYYCAR
-------
>V114RF-JZKE01294668.1-trbv |(161, 463)|2.68456732599|(0.939,0.863,0.909)|-1
-----HTDAGITQNPRFRVTETGKQVTLRCHQTDK-------HDYMYWYRQDLGHGLRLI
HYSIGAG--N----TEKGQFSDGYSVSRSN-EQNFSLT------LESATPSQTSVYFCAS
SDST---
>V121RF-JZKE01294669.1-trbv |(21670, 21960)|2.5109270082|(0.813,0.827,0.905)|-1
-------DAGVIQSPRHLIKGKQETTILKCYPLSG-------HDTVYWYQQAPGQGLQFL
ISYYEK---MQR--EKGNI-PQRFSGQQFA-DYHSELN------LSSLEPGDSALYLCAS
SL-----
>V124RF-JZKE01294690.1-trbv |(9942, 10239)|2.45794120885|(0.806,0.886,0.792)|-1
-----PLDTAVFQTPKYLVSQMGNNVSLKCKQTLG-------HNTMYWYKQDSEKLLKIM
FAYNNK---ELI--LNETV-SNRFSPASPD-KAHLNLH------IESPEPDDSAVYLCAS
SY-----
>V125RF-JZKE01294692.1-trbv |(174, 471)|2.56405369514|(0.861,0.915,0.810)|-1
-----PVDTGITQTPRHLVMGMTDKKSLKCEQNLG-------HDAMYWYKQSAKKPPELM
FYYNYQ---ELR--ENLTV-SSRFSPECPD-SSHLYLH------LDALQPDDSAMYLCAS
SQ-----
>V1RF-AJFE01003265.1-ighv |(14098, 14407)|2.86341488175|(0.927,0.976,0.982)|1
----VQCEVQLVE-SGGGLVQPGGSLRLSCAASGFTF-S---SYWMHWVRQAPGKGLVWV
SRINSD-G-SST--SYADSLKGQFTISRDNAKNTLYLQ------MNSLRAEDMAVYYCTR
-------
>V3RF-AJFE01011110.1-ighv |(45852, 46161)|2.96812379208|(0.976,0.999,0.997)|1
----VQCEVQLLE-SGGGLVQPGGSLRLSCAASGFTF-S---SYWMHWVRQAPGKGLEWV
SRINSD-G-SST--SYADSVKGRFTISRDNAKNTLYLQ------MNSLRAEDTAVYYCTR
-------
>V4RF-AJFE01011110.1-ighv |(53572, 53887)|2.94677334931|(0.994,0.980,0.975)|1
----VQCEVQLVE-SGGGLVQPGGSLRLSCAASGFTF-S---GSAMHWVRQASGKGLEWV
GRIRSKANSYAT--AYAASVKGRFTISRDDSKNKAYLQ------MNSLKTEDTAVYYCTT
-------
>V7RF-AJFE01011113.1-ighv |(30008, 30314)|2.9949000027|(0.996,0.999,1.000)|1
----VQCEVQLVE-SGGGLVQPGGSLRLSCAASGFTF-S---SYAMHWVRQAPGKGLEWV
SLIYSG---DST--YYADSVKGRFTISRDNSKNTLYLQ------MGSLRAEDTAVYYCAR
-------
>V9RF-AJFE01011588.1-igkv |(6066, 6365)|2.96500040988|(0.982,0.997,0.987)|1
----ARCDIQVTQSPSSLSASVGDRVTITCRASQGIS------NGLSWYQQKPGQAPTLL
IY----A--AS---SLQSGIPSRFSGSGS--GTDFTLT------ISSLQPEDVATYYCLQ
DYTTH--
>V12RF-AJFE01012232.1-igkv |(11186, 11479)|2.97352104271|(0.997,1.000,0.978)|1
----ARCDIQMTQSPSSLSASVGDRVTITCRASQSIS------NYLSWYQQKPGKAPKLL
IY----Y--AS---TLQSGVPSRFSGSGS--GTDFTLT------ISSLQPEDFATYYCQH
GYG----
>V13RF-AJFE01012232.1-igkv |(33464, 33764)|2.88142728968|(0.996,0.921,0.987)|1
----ARCDIQLTQSPSSLSASVGDRVTITCRASQGIS------SYLNWYQQKPGKVPKLL
IY----S--AS---NLQSGVPSRFSGSGS--GTDFTLT------ISSLQPEDVATYYCQR
TYNAP--
>V14RF-AJFE01012232.1-igkv |(62717, 63017)|2.96469865217|(0.997,0.973,0.997)|1
----ARCDIRMTQSPSSLSASVGDRVTITCQASQDIS------NYLNWYQQKPGKAPKLL
IY----D--AS---NLETGVPSRFSGSGS--GTDFTFT------ISSLQPEDIATYYCQQ
YDNLP--
>V16RF-AJFE01012234.1-igkv |(16459, 16774)|2.79035004269|(0.991,0.956,0.889)|1
----SSADIVMTQTPLSLSVTPGQPASISCKSSQSLLH-SDGNTYLYWYLQKPGQSPQLL
IY----R--VS---NRASGVPDRFSGSGS--GTDFTLK------ISRVEAEDVGVYYCMQ
GIQLP--
>V18RF-AJFE01012235.1-igkv |(6765, 7067)|2.84321501844|(0.965,0.956,0.928)|1
----SSGDIVMTQTPLSSPVTLGQPASISCRSSQSLVH-SDGNTYLSWLQQRPGQPPRLL
IY----K--VS---NRFSGVPDRFSGSGA--GTDFTLK------ISRVEAEDVGVYYCTQ
A------
>V20RF-AJFE01012236.1-igkv |(7268, 7564)|2.78180366329|(0.950,0.873,0.988)|1
----TTGEIVLMQSSATLSLSPGERATLSCRASQSVS-----SSYLAWYQQKPGQAPRLL
IY----D--AS---TRATGIPDRFSGSGS--GTDFTLT------ISRLEPEDFAVYYCQQ
YGS----
>V23RF-AJFE01012238.1-igkv |(29982, 30282)|2.92954165691|(0.989,0.960,0.984)|1
----ARCDIQMTQSPSSLSASVGDRVTITCRASQGIS------NYLAWFQQKPGKVPKRL
IY----A--AS---SLQSGVPSRFSGSGS--GTEFTLT------ISSLQPEDFATYYCLQ
HNSYP--
>V25RF-AJFE01012245.1-igkv |(2610, 2910)|2.90924200392|(0.997,0.932,0.997)|1
----ARCAIQLTQSPSSLSASVGDRVTITCRASQGIS------NRLNWYQQKPGKAPKLL
IY----D--AS---SLESGVPSRFSGSGS--GTDFTLT------ISSLQPEDFATYYCQQ
FNSYP--
>V26RF-AJFE01012249.1-igkv |(2485, 2785)|2.82366539908|(0.996,0.914,0.949)|1
----TTREIVLTQSPATLSLSPGEKATLSCRASQSVS------SYLAWYQQKPGQAPRLL
IY----D--AS---NRATGIPARFSGSGS--GTDFTLT------ISSLEPEDFAVYYCQQ
RSNWH--
>V29RF-AJFE01024273.1-trdv |(100475, 100781)|2.12567362895|(0.773,0.615,0.948)|1
---RGMLCDKVTQSSPDQTVASGSEVVLLCTYDAV-----YSNPDLFWYRIRPDYSFQFV
FYGDNSR--SQAADFTQGRFSVKHILT----QKAFHLV------ISPVRTEDSATYYCAF
-------
>V31RF-AJFE01038664.1-trgv |(28742, 29055)|2.60216826992|(0.971,0.863,0.861)|1
----SQKSSNLEGRTKSVTRETRSSAEITCDLTVT-----N-TFYIHWYLHQEGKAPQRL
LYYDVST--ARD-VLESGLSPGKYYTHTPR-RWSWILR------LQNLIENDSGVYYCAT
WD-----
>V32RF-AJFE01038665.1-trgv |(1085, 1398)|2.63232881093|(0.969,0.835,0.911)|1
----SQKSSNLEGRTKSVIRQTGSSAEITCDLDGG-----S-TGYIHWYLHQEGKAPQRL
LYYDSYT--SRV-VLESGISPGKYDTYGST-RKNLRLI------LRNLIENDSGVYYCAT
WD-----
>V33RF-AJFE01038666.1-trgv |(1901, 2214)|2.58063860595|(0.962,0.853,0.856)|1
----SQKSSNLEGRMKSVTRPTGSSAEITCDLTVI-----N-AVYIHWYLHQEGKSPQRL
LYYDVSN--SRD-VLESGLSPGKYYTHTPR-RWSWILR------LQNLIENDSGVYYCAT
WD-----
>V37RF-AJFE01039607.1-trbv |(117721, 118021)|2.53558910331|(0.917,0.913,0.779)|1
-----LTEPEVTQTPSHQVTQMGQEVILRCVPISN-------HLYFYWYRQILGQKVEFL
VSFYNN---EIS--EKSEIFDDQFSVERPD-GSNFTLK------IWSTKLEDSAMYFCAS
SE-----
>V38RF-AJFE01039607.1-trbv |(129949, 130246)|2.66439703336|(0.916,0.942,0.835)|1
-----PIDTEVTQTPKHLVMGMTNKKSLKCEQHMG-------HRAMYWYKQKAKKPPELM
FVYSYE---KLS--INESV-PSRFSPECPN-SSLLNLH------LHALQPEDSALYLCAS
SQ-----
>V39RF-AJFE01039607.1-trbv |(137829, 138125)|2.44775110564|(0.924,0.742,0.907)|1
-----PVEAGVTQTPRYLIKARGQQVTLSCSPISG-------HRSVSWYQQTPGQGLQFL
FEYFSE---TQR--NKGNF-PGRFSGRQFS-NSRSEMN------VSTLELGDSALYLCAS
SL-----
>V40RF-AJFE01039608.1-trbv |(1218, 1515)|2.89824228261|(0.987,0.987,0.935)|1
-----PVNAGVTQTPKFQVLKTGQSMTLQCAQDMN-------HNSMYWYRQDPGMGLRLI
YYSVGEG--T----TDKGEVPDGYNVSRLN-KREFSLR------LESAAPSQTSVYFCAS
SE-----
>V41RF-AJFE01039609.1-trbv |(5245, 5558)|2.52770427131|(0.956,0.896,0.792)|1
-----PMEMGVTQTPRHLVMGMTNKKSLKCEQHLG-------HNAMYWYKQSAKKPLELM
FVYNFK---EQT--ENNSV-PSRFSPECPN-SSHLFLH------LHALQPEDSALYLCAS
SQDTALQ
>V45RF-AJFE01045037.1-ighv |(12790, 13099)|2.93258443703|(0.994,0.954,0.991)|1
----VQCEVQLVE-SGGGLVKPGGSLRLSCAASGFTF-S---NYYMHWVRQAPEKGLEWV
STISGS--GGST--WYPDSVKGRFTISRDNSKNTLYLQ------MNSLRAEDTAVYYCAR
-------
>V46RF-AJFE01045037.1-ighv |(23646, 23958)|2.98980401921|(0.999,0.999,0.992)|1
----VQCEVQLVE-SGGGLVKPGGSLRLSCAASGFTF-S---SYSMNWVRQAPGKGLEWV
AYISSP-SGSST--YYADSVKGRFTISRDNSKNTLYLQ------MNSLRAEDTAVYYCAR
-------
>V47RF-AJFE01045041.1-ighv |(1266, 1575)|2.9939280013|(1.000,0.997,0.997)|1
----VQCEVQLVE-SGGALVKPGGSLRLSCAASGFTF-S---SYGMHWVRQAPGKGLEWV
SYISYD--SSYI--YYADSVKGRFTISRDNAKNSLYLQ------MNSLRAEDTAVYYCAR
-------
>V48RF-AJFE01045048.1-ighv |(1386, 1695)|2.94401938908|(0.991,0.997,0.960)|1
----VQCEVQLVE-SGGGLVQPGGSLRLSCAASGFTF-D---DYGMSWVRQAPGKGLEWV
SLISWD--GGST--YYADSVKGRFTISRDNSKNSLYLQ------MNSLRAEDTALYYCAR
-------
>V49RF-AJFE01045051.1-ighv |(2850, 3156)|2.85953001165|(0.980,0.912,0.986)|1
----VLSQLQLQE-SGPGLVKPSETLSLTCTVSGGSI-S---SYYWSWIRQPPGKGLEWI
GNIYYS---GSA--YYNPSLKSRVTISVDTSKNQFSLK------LSSVTAADTAVYYCAR
-------
>V50RF-AJFE01045051.1-ighv |(17267, 17573)|2.9969280013|(0.997,1.000,1.000)|1
----VQCEVQLVE-SGGGLVQPGGSLRLSCAASGFTV-S---SYHMSWVRQAPGKGLEWV
SVIYSG--G-ST--YYADSVKGRFTISRDNSKNTLYLQ------MNSLRAEDTAVYYCAR
-------
>V52RF-AJFE01045051.1-ighv |(52919, 53234)|2.90080001|(0.967,0.972,0.962)|1
----VQCEVQLVE-SGGGLVQPGRSLRLSCTASGFTF-G---DYAMSWIRQAPGKGLEWV
GFIRSKAYGGTT--EYAASVKGRFTISRDDSKSIAYLQ------MNGLKTEDTAVYYCTR
-------
>V54RF-AJFE01045051.1-ighv |(75870, 76179)|2.89085291224|(0.956,0.984,0.954)|1
----AHSQVQLVQ-SGAEVKKPGASVKVSCKASGYTF-T---SYTISWLRQAPGQGLEWM
GVISPS-D-GST--SYAQKFQGRVTMTRDTSTSTVYME------LSSLRSEDTAVYYCAR
-------
>V55RF-AJFE01045051.1-ighv |(79995, 80304)|2.86237212748|(0.956,0.962,0.945)|1
----AYSQMQLVQ-SGAEVKKPGSSVKVSCKASGYTF-T---YRYLHWVRQAPGQALEWM
GWITPY-N-GNT--NYAQKFQDRVTITRDRSMSTAYME------LRSLRSEDSAVYYCAR
-------
>V59RF-AJFE01069975.1-trav |(15309, 15599)|2.85774467291|(0.957,0.940,0.962)|1
----MTRGEDVEQS-LFLSVREGDSSVINCTYTDS-----S-STYLYWYKQEPGAGLQLL
TYIFSNM--DM---KQDQRLTVLLNKK----DKHLSLR------IADTQTGDSAIYFCAE
S------
>V60RF-AJFE01069975.1-trav |(34873, 35161)|2.64942223399|(0.851,0.925,0.908)|1
-----VKSQKIEQNSEALNIQEGKTATLTCNYTNY-----S-PAYLQWYRQDPGRGPVFL
LLIRENE--KE---KRKERLKVTFDTT----LKQGVFH------ITASQPADSATYLCAL
-------
>V61RF-AJFE01069975.1-trav |(49199, 49486)|2.64569465218|(0.875,0.874,0.899)|1
----ANGENQVEHSPHFLGPQQGDVASMSCTYSVS-----R-FNNLQWYRQNTGMGPKHL
LSMYSAG--YE---KQKGRLNAILLKN------GSSLY------ITAVQPEDSATYFCAV
D------
>V63RF-AJFE01069975.1-trav |(77622, 77916)|2.86723761813|(0.938,0.975,0.962)|1
----GINGDSVVQTEGQVLLSEGDSLIVNCSYETT-----QY-PSLLWYVLYPGEGPQLL
LKAMKA---NDN--GRNKGFEATYRKE----TTSFHLE------KDSVQESDSAVYFCAL
S------
>V64RF-AJFE01069975.1-trav |(91696, 91989)|2.60401848808|(0.832,0.889,0.951)|1
----GSGKNQVEQSPQSLIILEGKNCTLQCNYTVS-----P-FNNLRWYKQDTGRGPVSL
TIMTFSE--NT---KSNGRYTATLDAD----TKKSSLH------ITASQLSDSASYICVV
S------
>V65RF-AJFE01069975.1-trav |(107426, 107714)|2.75344440614|(0.912,0.882,0.983)|1
---VWSQRKEVEQDPGPFNVPEGATVAFNCTYSNS-----A-SQSFFWYRQDCRKEPKLL
MSVYSSG--N-----EDGRFTAQLNRA----SQYISLL------IRDSKLSDSATYLCAV
-------
>V66RF-AJFE01069975.1-trav |(118638, 118935)|2.44630521572|(0.929,0.789,0.837)|1
----TVRAQSVTQPDIHITVSEGASLELRCNYSYG-----AT-PSLFWYVQSPGQGLQLL
LKYFSGD--TLV--QGIKGFEAEFKRS----QSSFNLR------KPSVHWSDAAEYFCAV
G------
>V67RF-AJFE01069975.1-trav |(134910, 135200)|2.78258870068|(0.931,0.939,0.914)|1
-----VNGENVEQHPSTLSVQEGDGAVIKCTYSDS-----A-SNYFPWYKQELGKGPQLI
IDIRSNM--GE---KKDQRIAVTLNKT----AKHFSLH------ITETQPEDSAVYFCAA
S------
>V68RF-AJFE01069975.1-trav |(154372, 154663)|2.75305475292|(0.924,0.891,0.944)|1
---VWSQQKEVEQNSGPLSVPEGAIASLNCTYSDR-----R-SQSFFWYRQYSGKSPELI
MSIYSNG--DE----EDGRFTAQLNKA----SQYVSLL------IRDSQPSDSATYLCAV
-------
>V69RF-AJFE01069975.1-trav |(160863, 161160)|2.57928544142|(0.929,0.867,0.834)|1
----GTRAQSATQLDSHVSVSEGALVLLRCNYSSS-----VP-PYLFWYVQYPNQGLQLL
LKYTTGA--TLV--KGINGFEAEFKKS----ETSFHLT------KPSAHVNDAAEYFCAV
S------
>V70RF-AJFE01069976.1-trav |(18238, 18531)|2.72364875484|(0.940,0.910,0.888)|1
----VSRGESVGLHLPTLSVQEGDNSIINCAYSNS-----A-SDYFIWYKQESGKGPQFI
IDIRSNM--DK---RQGQRVTVLLNKT----VKHLSLQ------IAATQPGDSAVYFCAE
N------
>V71RF-AJFE01069976.1-trav |(24122, 24425)|2.74536703348|(0.951,0.874,0.944)|1
----PGIAQKITQTQPGMFVQEKEAVTLDCTYDTS-----DPSYGLFWYKQPSSGEMIFL
IYQGSYD--QQN--ATEGRYSLNFQKA----RKSANLV------ISASQLGDSAMYFCAV
RE-----
>V72RF-AJFE01069976.1-trav |(40935, 41229)|2.83247644675|(0.935,0.929,0.975)|1
----RTRGDSVTQMEGPVTLSEEAFLTINCTYTAT-----GY-PSLFWYVQYPGEGLQLL
LKATKA---DDK--GSNKGFEATYRKE----TTSFHLE------KDSVQASDSAVYFCAL
S------
>V73RF-AJFE01069976.1-trav |(65330, 65623)|2.78332889642|(0.927,0.900,0.965)|1
---VWSQQKEVEQDPGPLSVPEGAIASLNCTYSNS-----A-FQYFMWYRQYSRKGPELL
MYTYSSG--NK----EDGRFIAQVDTS----SKYISLF------IRDSQPSDSATYLCAM
S------
>V75RF-AJFE01069976.1-trav |(97788, 98075)|2.73366902748|(0.908,0.889,0.943)|1
-----VNSQQGEEDPQALSIQEGENAIMNCSYKT------S-INNLQWYRQNSGRGLVHL
ILIRSNE--RE---KHSGRLRVTLDTS----KKSSSLL------ITASRAADTASYFCAT
D------
>V77RF-AJFE01069976.1-trdv |(107857, 108160)|2.26796052424|(0.761,0.763,0.745)|1
----SSMAQKVTQAQTEISVVEKEDVTLDCVYETR-----DTTYYLFWYKQPPSGELVFL
IRRNSFD--EQN--EISGRYSWNFQKS----TSSFNFT------ITASQVVDSAVYFCAL
SE-----
>V78RF-AJFE01069977.1-trav |(1078, 1365)|2.56130846924|(0.923,0.872,0.819)|1
----LSGEDQVTQSPEALRLQEGESSSLNCSYTVS-----G-LRGLFWYRQDPGKGPEFL
FTLYSAG--EE---KEKERLKATLTKK------ESFLH------ITAPKPEDSATYLCAV
Q------
>V84RF-AJFE01104359.1-trbv |(36551, 36842)|2.54787003685|(0.906,0.823,0.856)|1
-----LMEAEIYQTPRHRVIGTGKKITLECSQTMG-------HDKMYWSRSRNGITPHPP
FLW--VN--S----TEKGDLSSESTVSRIR-IERFPLT------LESASPSHTSQYLCAS
SE-----
>V85RF-AJFE01104369.1-trbv |(8636, 8939)|2.67629443766|(0.891,0.851,0.959)|1
----SVFSAVISQKPSRDICQRGTSMTIQCQVDSQ-------VTMMFWYCQQPGQSMTLI
ATANQGS--EAT--YESRFVIDKFPISRPN-LTFSTLT------VSNRRPEDSSIYLCSV
E------
>V87RF-AJFE01002289.1-igkv |(593, 893)|2.91572292008|(1.000,0.934,0.999)|-1
----ARCDIQMTQSPSSLSASVGDRVTITCRASQGIR------NDLGWYQQKPGKAPKLL
IY----A--AS---SLQSGVPSRFSGSGS--GTDFTLT------ISSLQPEDFATYYCLQ
DYNYP--
>V88RF-AJFE01002352.1-igkv |(655, 955)|2.85731605249|(0.995,0.922,0.965)|-1
----ARCAIRMTQSPSSLSASTGDRVTITCRASQGIS------SYLAWYQQKPGKAPKLL
IY----A--AS---TLQSGVPSRFSGSGS--GTEFTLT------ISCLQSEDFATYYCQQ
YYSYP--
>V90RF-AJFE01010527.1-trav |(11555, 11845)|2.38742140285|(0.889,0.749,0.836)|-1
----VSSILNVEQSPQSLHVQEGDSTNFTCSFPSS-----N-FYALHWYRWETAKSPEAL
FVMTLNG--DE---KKTGRISATLNTK----EGYSYLY------IKGSQPEDSATYLCAF
-------
>V91RF-AJFE01010827.1-iglv |(3125, 3428)|2.72435543386|(0.975,0.954,0.854)|-1
----SVTSYVLTQ-PPSVSVAPEQTARITCGG------NNIGSKSVHWYQQKPGQAPVLV
IY----D--DS---DRPSGIPERFSGSKS--GNTATLT------ISRVEAGDEADYYCQV
WDSSSKH
>V92RF-AJFE01010827.1-iglv |(11046, 11349)|2.72897270218|(0.955,0.847,0.974)|-1
----SVVSSELTQ-DPAVSVALGQTVRITCQGDSL---R---SYYASWYQQKPGQAPVLV
IY----G--NN---NRPSGIPDRFSGSSS--GNTASLT------ITGAQAEDEADYYCSS
LDSSGNH
>V93RF-AJFE01010827.1-iglv |(27044, 27354)|2.73341849523|(0.893,0.909,0.942)|-1
----SWAQSALTQ-PPSVSGSPGQSVTISCTGTSS---DVGSYNRVSWDQQPPGKAPKLM
IY----E--VS---KRPSGVPDRFSGSKS--GNTASLT------ISGLQAEDEADYYCSS
YTSSST-
>V94RF-AJFE01010828.1-iglv |(147, 450)|2.80666090365|(0.972,0.968,0.892)|-1
----SVTSYVLTQ-PPSVSVAPGQTARITCGG------NNIGSKSVHWYQQKPGQAPVLV
VY----D--DS---DQPSGIPERFSGSKS--GNTATLT------ISRVEAGDEADYYCQV
WDSSSDH
>V95RF-AJFE01010829.1-iglv |(16809, 17106)|2.70099720894|(0.966,0.829,0.979)|-1
----SVASYELTQ-PSSVSVSPGQTARITCSG------DVLAKNYARWFQQKPGQAPVLV
IY----K--DS---ERPSGIPERFSGSSS--GTTVTLT------ISGAQVEDEADYYCYS
AADNN--
>V98RF-AJFE01017581.1-iglv |(4261, 4557)|2.88594139915|(0.989,0.953,0.954)|-1
----SVASYELTQ-PPSVSVSPGQTASITCSG------DKLGDKYAYWYQQKSGQSPVLV
IY----Q--DS---KRPSGIPERFSGSNS--GNTATLT------ISGTQAMDEADYYCQA
WDSST--
>V100RF-AJFE01017584.1-iglv |(3557, 3860)|2.93766265282|(0.987,0.963,0.990)|-1
----SEASYELTQ-PPSVSVSPGQTARITCSG------DALPKQYAYWYQQKSGQAPVLI
IY----E--DS---KRPSGIPERFSGSSS--GTMATLT------ISGAQVEDEADYYCYS
TDSSGNH
>V101RF-AJFE01017584.1-iglv |(14566, 14876)|2.70256086362|(0.994,0.882,0.906)|-1
----SWAQSALTQ-PPSASRSPGQSVTISCTGTSS---DIGGYNYVSWYQQHPGKAPKLM
IY----E--VS---KRPSGVPDRFSGSKS--GNTASLT------VSGLQAEDEADYYCSS
YAGSNN-
>V102RF-AJFE01017586.1-iglv |(12261, 12571)|2.90790891268|(0.993,0.989,0.938)|-1
----SWAQSALTQ-PPSVSGSPGQSVTISCTGTSS---DVGGYNYVSWYQQHPGTAPKLM
IY----D--VS---KRPSGVPDRFSGSKS--GNTASLT------ISGLQAEDEADYYCCS
YAGSYS-
>V105RF-AJFE01020628.1-iglv |(6538, 6850)|2.9109858358|(0.989,0.939,0.993)|-1
----SWAQSVLTQ-PPSVSGAPGQRVTISCTGSSS---NIGAGYDVHWYQQLPGTAPKLL
IY----E--NN---KRPSGVPDRFSGSKS--GTSASLA------ITGLQAEDEADYYCQS
YDSSLSG
>V107RF-AJFE01020631.1-iglv |(2749, 3058)|2.82620529852|(0.947,0.927,0.954)|-1
----SWAQSVLTQ-PPSVSGTPGQRVTISCSGSSS---NIG-SNTVNWYQQLPGTAPKLL
IY----S--NN---QRPSGVPDRFSGSKS--GTSASLA------VSGLRSEDEADYYCAA
WDDSLNG
>V109RF-AJFE01020631.1-iglv |(24444, 24762)|2.64379419964|(0.955,0.820,0.940)|-1
----SLSQPVLTQ-PTSLSASPGASARLTCTLRSG---INVGSYYISWYQQKPGSPPRYL
LNYYSDS--DK---GQGSGVPSRFSGSKDASTNAGLLL------ISGLQSEDEADYYCAI
WYS----
>V111RF-AJFE01020632.1-iglv |(18572, 18882)|2.79235249855|(0.965,0.896,0.951)|-1
----SLSQSVVTQ-PASLSASPGASASLTCTLRSG---INVGTYRISWYQQKPGSPPRYL
LRYKSDS--DK---QQGSGVPSRFSGSKDASANAGILV------ISGLQSEDEADYYCMI
-------
>V112RF-AJFE01020634.1-iglv |(1918, 2227)|2.83693047006|(0.961,0.960,0.922)|-1
----SWAQSVLTQ-PPSVSAAPGQKVTISCSGSS----SNIGNNYVSWYQQLPGTAPKIL
IY----D--NN---KRPSGISDRFSGSKS--GTSATLG------ITGLQTGDEADYYCGT
WDSSLSA
>V115RF-AJFE01022796.1-iglv |(57629, 57936)|2.68096447501|(0.915,0.849,0.936)|-1
----SWANFMLTQ-PHSVSESLGQTVTISCPRSSG---SIA-SNYVQWYQQRPGSAPTTV
IY----E--DN---RRPSGVPDRFSGSIDRSSNSASLT------ISGLKSEDEADYYCQS
YDSS---
>V116RF-AJFE01022798.1-iglv |(2606, 2906)|2.59817583335|(0.907,0.852,0.860)|-1
----SLSQLVLTQ-SPSASASLGASVKLTCTLSSG---H--SSYAIAWHQQQPEKGPRYL
MKLNSDG--SH---SKGDGIPDRFSGSSSG--AERYLT------ISSLQSEDEADYYCQT
W------
>V117RF-AJFE01022798.1-iglv |(70777, 71086)|2.65541477313|(0.891,0.950,0.839)|-1
----VDSQTVVTQ-EPPFSVSPGGTVTLTCGLSSG---SVSTSYYPSWYQQTPGQAPRTL
IY----S--TN---TRSSGVPGRFFGSII--GNKAALT------ITGAQADDESDYYCLL
YMGSGI-
>V121RF-AJFE01024276.1-trav |(19317, 19607)|2.56691409766|(0.825,0.884,0.887)|-1
----VSSEDKVVQSPLSLVVHEGDTVTLNCSYEVT-----N-FQSLLWYKQEK-KAPTFL
FMLTSSG--IE---KKSGRLSSILDKK----ELFSILN------ITATQTGDSAIYLCAV
E------
>V122RF-AJFE01024276.1-trav |(73725, 74027)|2.81735067488|(0.951,0.954,0.917)|-1
----FSMAQTVTQSQPEMSVQEAETVTLSCTYDTS-----ESDYYLFWYKQPPSRQMILV
IRQEAYK--QQN--ATENRFSVNFQKA----AKSFSLK------ISDSQLGDAAMYFCAY
RS-----
>V123RF-AJFE01024276.1-trav |(95666, 95954)|2.53333938477|(0.864,0.783,0.929)|-1
----LSGELKVEQSPLFLSTQEGKNYTIYCNYSTT-------SDRLYWYRQDPGKSLESL
FVLLSNG--AV---KQEGQLMASLDTK----ARLSTLH------ITAAVHDLSATYFCAV
-------
>V125RF-AJFE01045439.1-ighv |(4672, 4981)|2.98666002957|(1.000,0.994,0.993)|-1
----VQCEVQLVE-SGGGLVQPGGSLTLSCAASGFTF-S---SYWMSWVRQAPGKGLEWV
ANIKKD--GSEK--YYADSVKGRFTISRDNAKNSLYLQ------MNSLRAEDTAVYYCAT
-------
>V126RF-AJFE01045444.1-ighv |(1979, 2288)|2.94619314055|(0.997,0.984,0.969)|-1
----AHSQVQLVQ-SGAEVKKPGASVKVSCKASGYTF-T---SYDINWVRQATGQGLEWM
GWMNPN-S-GNT--GYAQKFQGRVTMTRDTSISTAYME------LSSLRSEDTAVYYCAR
-------
>V127RF-AJFE01045447.1-ighv |(71, 380)|2.97832022844|(0.997,0.998,0.984)|-1
----VQCEVQLVE-SGGGVVQPGRSLRLSCAASGFTF-S---NYAMHWVRQAPGKGLEWV
SVISSS--GSYI--YYADSVKGRFTISRDNAKNSLYLQ------MNSLRAEDTALYYCAK
-------
>V128RF-AJFE01045453.1-ighv |(639, 948)|2.98993600205|(0.998,0.998,0.994)|-1
----VQCQVQLVE-SGGGLVKPGGSLRLSCAASGFTF-S---NHYMSWIRQAPGKGLEWV
SYISYD--SSYI--NYADSVKGRFTISRDNAKNSLYLQ------MNSLRAEDTAVYYCAR
-------
>V129RF-AJFE01047586.1-igkv |(1119, 1419)|2.99699200002|(0.999,1.000,0.998)|-1
----TRCDIQMTQSPSSLSASVGDRVTITCRASQGIS------NYLAWYQQKPGKAPKLL
IY----Y--AS---RLESGVPSRFSGSGS--GTDYTLT------ISSLQPEDFATYYCQQ
YNSNP--
>V130RF-AJFE01070459.1-trbv |(7045, 7343)|2.45547413026|(0.906,0.903,0.745)|-1
-----SMDADVTQTPRNRITKTGKRIMLECSQTKG-------HDRMYWYRQDPGLGLRLI
YYSFDVK--D----INKGEISDGYSVSRQA-QAKFSLS------LESAIPNQTALYFCAT
SD-----
>V131RF-AJFE01070459.1-trbv |(21089, 21386)|2.79434247428|(0.924,0.954,0.920)|-1
-----LMEADIYQTPRYLVIGTGKKITLECSQTMG-------HDKMYWYQQDPGMELHLI
HYSYGVN--S----TEKGDLSSESTVSRIR-TEHFPLT------LESARPSHTSQYLCAS
SE-----
>V134RF-AJFE01070459.1-trbv |(70897, 71194)|2.72381236782|(0.910,0.872,0.956)|-1
-----LVDVKVTQSSRYLVKRMGEKVFLECVQDMD-------HENMFWYRQDPGLGLRLI
YFSSDVK--M----KEKGDIPEGYSVSREK-KERFSLI------LESASTNQTSMYLCAS
SI-----
>V137RF-AJFE01070460.1-trbv |(18108, 18405)|2.73929648886|(0.905,0.896,0.945)|-1
-----TVDGGITQSPKYLFRKEGQNVTLNCEQNLN-------HDAMYWYRQDPGQGLRLI
YYSQIVN--D----FQKGDIAEGYSVSREK-KESFPLT------VTSAQKNPTAFYLCAS
SI-----
>V140RF-AJFE01070460.1-trbv |(44986, 45286)|2.60769148566|(0.900,0.871,0.850)|-1
-----SFHAKVTQTPGHLVKGKGQKTKMDCTPEKG-------HVFVYWYQQNQNKEFMLL
ISFQNEQ---VL--QETEMHKTRFSSQCPK-NTPCSLA------ILSSEPGDTALYLCAS
SQ-----
>V142RF-AJFE01070461.1-trbv |(19125, 19425)|2.47913995346|(0.926,0.902,0.759)|-1
-----HKEAGVTQFPSHSVIEKGQTVTLRCDPISG-------HDNLYWYRRVMGKEIKFL
LHFVRES---KQ--DESGMPNNRFLAERTG-GTYSTLK------VQPAELEDSGVYFCAS
SQ-----
>V143RF-AJFE01070461.1-trbv |(29248, 29548)|2.55115457633|(0.887,0.803,0.889)|-1
-----SPGEEVTQTPKHLVRGEGQKAKLYCAPIKG-------HSYVFWYQQVLKKEFKFL
ISFQNEN---VF--DKTGMPKERFSAKCLS-NSPCSLE------IQATKLEDSAVYFCAS
SQ-----
>V145RF-AJFE01070462.1-trbv |(17609, 17909)|2.46969013592|(0.967,0.928,0.751)|-1
-----HTDAGVIQSPRHEVTEMGQEVTLRCKPISG-------HNSLFWYRQTMMQGLELL
IYFNNN---VPI--DDSGMPKDRFSAKMPN-ASFSTLK------IQPSEPRDSAVYFCAS
SL-----
>V146RF-AJFE01070463.1-trbv |(1165, 1465)|2.5965755174|(0.956,0.964,0.786)|-1
-----HTGAGVSQTPSNKVTEKGKDVELRCDPISG-------HAALYWYRQSLGQGPEFL
IYFRGT---GAA--DDSGLPNDRFFAVRPE-GSVSTLK------IQRTEQGDSAVYLCAS
SL-----
>V149RF-AJFE01070463.1-trbv |(24431, 24731)|2.67550618885|(0.925,0.879,0.886)|-1
-----LSEAEVAQSPRYKITEKSQAVAFWCDPISG-------HATLYWYRQILGQGPELL
VQFQDES---VV--DDSQLPKDRFSAERLK-GVDSTLK------IQPAELGDSAMYLCAS
SL-----
>V152RF-AJFE01070463.1-trbv |(67763, 68060)|2.52552247435|(0.954,0.983,0.748)|-1
-----PVNGGVTQTPKFQVLKTGQSMTLQCAQDMN-------HDYMYWYRQDPGMGLRLI
HYSAGAG--I----TDKGEVPNGYNVSRSN-TEDFPLS------LVSAAPSQTSVYFCAS
SY-----
>V153RF-AJFE01070463.1-trbv |(71976, 72276)|2.64277338538|(0.956,0.941,0.819)|-1
-----HTGAGVSQSPRYKVAKRGRDVALRCDSISG-------HVTLYWYRQTLGQGSEVL
TYFRSD---AQR--DKSGRPSGRFSAERPE-RSVSTLK------IQRTEQGDSAVYLCAS
SL-----
>V154RF-AJFE01070463.1-trbv |(79903, 80199)|2.49485471498|(0.962,0.840,0.824)|-1
-----SVETGVTQSPTHLIKTRGQQVTLRCSPQSG-------HNTVSWYQQALGQGPQFI
FQYYREE---EN--GR-GNFSPRFSGRQFP-NYSSELN------VNALELDDSALYLCAS
SL-----
>V155RF-AJFE01070463.1-trbv |(86352, 86648)|2.79296892399|(0.986,0.921,0.920)|-1
-------NAGVTQTPKFRILKIGQSMTLQCAQDMN-------HNYMYWYRQDPGMGLKLI
YYSVGAG--I----TDKGEVPNGYNVSRST-TEDFPLR------LESAAPSQTSVYFCAS
SYST---
>V157RF-AJFE01070463.1-trbv |(99363, 99659)|2.67498084339|(0.945,0.838,0.937)|-1
-----PVDAGVTQSPTHLIKTRGQHVTLRCSPISG-------HKSVSWYQQALGQGPQFI
FEYYEKE---ER--GR-GNFPDRFSARQFP-NYSSELN------VNALLLGDSALYLCAS
SL-----
>V159RF-AJFE01070463.1-trbv |(108994, 109294)|2.69044133148|(0.862,0.958,0.920)|-1
-----HTGAGVSQSPRYKVTKRGQDVTLRCDPISG-------HVALYWYQQALGQGPEFL
TYFNYE---AQP--DKSGLPNDRFSAERPE-GSNSTLT------IQRTEQRDSAMYLCAS
NL-----
>V160RF-AJFE01070463.1-trbv |(116814, 117110)|2.73066650111|(0.931,0.900,0.906)|-1
-----SVDAGVTQSPIHLIKTRGQQVTLRCSPQSG-------HDTVSWYQQVLGQGPQCI
FEYYEEE---ER--QR-GNFPDRFSGHQFP-NYSSELN------VNALLLGDSALYLCAS
SL-----
>V162RF-AJFE01070463.1-trbv |(128406, 128706)|2.68000804662|(0.879,0.910,0.896)|-1
-----HTGAGVSQSPRYKVTKRGQDVTLRCDPISS-------HATLYWYQQALGQGPEFL
TYFNYE---AQP--DKSGLPNDRFSAERPE-GSISTLT------IQRTEQRDSAMYLCAS
SL-----
>V163RF-AJFE01070463.1-trbv |(136837, 137133)|2.64841055459|(0.955,0.808,0.969)|-1
-----PVDAGVTQSPTHLIKTRGQHVTLRCSPISG-------HTSVSWYQQALGQGPQFI
FQYYEKE---ER--GR-GNFPDRFSARQFP-NYSSELN------VNALLLGDSALYLCAS
SL-----
>V164RF-AJFE01070463.1-trbv |(144146, 144443)|2.62866718477|(0.902,0.899,0.842)|-1
-----PVNAVVTQTPKFQVLKTGQSMTLQCAQDMN-------HDCMSWYRQDPGMGLRRI
HYSVAAG--I----TDKGEVPDGYNVSRSN-KEDLPLR------LESAAPSQTSVYFCAS
SY-----
>V165RF-AJFE01070463.1-trbv |(148806, 149106)|2.74494239438|(0.915,0.897,0.936)|-1
-----HTGAGVSQSPKYKVTKRGQDVALRCDPISG-------HVSLFWYQQALGQGPEFL
TYFRNE---AQL--DKSGLPSDRFFAERPE-GSVSTLK------IQRTQQEDSAVYLCAS
SL-----
>V166RF-AJFE01070463.1-trbv |(157011, 157307)|2.43677680958|(0.951,0.758,0.884)|-1
-----PVEAGVTQSPTHLIKTRGQQVTLRCSPISG-------HTSVYWYQQALGLGLQFL
LWYDEG---EER--NRGNF-PRRFSGRQFP-NYSSELN------VNALELEDSALYLCAS
SL-----
>V167RF-AJFE01070463.1-trbv |(166234, 166534)|2.73246377415|(0.889,0.950,0.910)|-1
-----HADTGVSQDPSHKITKRGQNVTFRCDPISE-------HNRLYWYRQTLGQGPEFL
TYFQNEA---QL--EKSRLLSDRFSAERPK-GSFSTLE------IQHTEQGDSAIYLCAS
SL-----
>V168RF-AJFE01070463.1-trbv |(172755, 173052)|2.5798548145|(0.930,0.777,0.968)|-1
-----SVAAGVIQSPRYLIKEKRETATLKCYPIPR-------HDTVYWYQQGPGQDPQFL
ISFYEKM---QS--DK-GSIPDRFSAQQFS-DYHSELN------MSSLELGDSALYFCAS
SS-----
>V169RF-AJFE01070464.1-trbv |(8813, 9110)|2.6397050841|(0.916,0.945,0.819)|-1
-----PLDTAVSQTPKYLVTQMGKKESLKCEQNLG-------HNAMYWYKQDSKKFLKTM
FIYSNK---EPI--LNETV-PNRFSPDSPD-KAHLNLH------INSLELGDSAVYFCAS
SQ-----
>V170RF-AJFE01070464.1-trbv |(12266, 12563)|2.57580362899|(0.961,0.851,0.855)|-1
-----PMEMGVTQTPRHLVMGMTNKKSLKCEQHLG-------HNAMYWYKQSAKKPLELM
FVYSLE---ERV--ENNSV-PSRFSPECPN-SSHLFLH------LHTLQPEDSALYLCAS
SQ-----
>V171RF-AJFE01070464.1-trbv |(20566, 20863)|2.63231151929|(0.957,0.869,0.868)|-1
-----PVNAGVTQTPKFRVLKTGQSMSLLCAQDMN-------HEYMYWYRQDPGMGLRLI
HYSVGEG--T----TAEGEVPDGYNVSRLK-KQNFLLG------LESAAPSQTSVYFCAS
SY-----
>V172RF-AJFE01070464.1-trbv |(52077, 52374)|2.45966963849|(0.904,0.756,0.885)|-1
-----PVIAGITQAPTSQILAAGRSMTLRCTQDMR-------HNAMYWYRQDLGLGLRLI
HYSNTAG--T----TGKGEVPDGYSVSRAN-TDDFPLT------LASAVPSQTSVYFCAS
SD-----
>V173RF-AJFE01070465.1-trbv |(4903, 5200)|2.76505829312|(0.911,0.969,0.899)|-1
-----PVNAGVTQSPKFRVLKTGQSMTLQCAQDMN-------HNYMYWYRQDPGMGLRLI
HYSAGEG--T----TAKGEVPDGYNVSRLN-TQNFLLR------LESAAPSQTSVYFCAT
SE-----
>V175RF-AJFE01119883.1-ighv |(31777, 32092)|2.85420080976|(0.952,0.967,0.937)|-1
----VQCEVQLVE-SGGGLVQPGGSLRLSCAASGFTF-S---DHYMSWVRQAQGKGLELV
RLIRNKANSYTT--EYAASVKGRFTISREDSKNTLYLQ------MSSLKTEDLAVYYCAR
-------
