# Supplementary material for: Iterative Variable Gene Discovery from Whole Genome Sequencing with a Bootstrapped Multiresolution Algorithm
Source: Comput Math Methods Med. 2019 Feb 11;2019:3780245. doi: 10.1155/2019/3780245 (PMC6388353; doi:10.1155/2019/3780245)
Supplement: Supplementary Materials — supp_materialsV2.pdf: this is an updated document, which includes new figures requested by the reviewer. sequences_alignments.zip: these are genome sequence files that are relevant for reproducing some of the results. [file 3780245.f1.zip › 3780245.f1/sequences_alignments/bstrp_iteration_0_r.nwk]

(((V148RF-CABD02117477.1-ighv:0.04235,((V5RF-ABGA01025797.1-ighv:0.03362,V62RF-ABGA01099947.1-ighv:0.04427)0.907:0.03349,(V168RF-AACZ03171037.1-ighv:0.00055,V45RF-AJFE01045037.1-ighv:0.02553)0.919:0.03491)0.739:0.01095)0.892:0.03071,(V82RF-ABDC01423814.1-ighv:0.04553,(V170RF-ABGA01203420.1-ighv:0.02551,V144RF-AQIB01153557.1-ighv:0.16244)0.908:0.04081)0.652:0.00212)0.787:0.01839,((V189RF-AHZZ01069458.1-ighv:0.01133,(V45RF-JYKQ01041713.1-ighv:0.02337,(V264RF-AQIA01066387.1-ighv:0.00054,(((V10RF-JZKE01244686.1-ighv:0.11277,((((V105RF-JZKE01278609.1-ighv:0.04711,(V106RF-JZKE01278610.1-ighv:0.05499,V110RF-JZKE01278614.1-ighv:0.07614)0.699:0.03261)0.314:0.01545,((V81RF-JZKE01235368.1-ighv:0.03482,V92RF-JZKE01278255.1-ighv:0.00055)0.953:0.03606,((V104RF-JZKE01278607.1-ighv:0.00053,V32RF-JZKE01255160.1-ighv:0.09745)0.074:0.01207,(((V14RF-JZKE01244715.1-ighv:0.06277,(V97RF-JZKE01278273.1-ighv:0.00054,V102RF-JZKE01278602.1-ighv:0.05608)0.970:0.07289)0.784:0.02204,V109RF-JZKE01278611.1-ighv:0.05498)0.661:0.00397,V94RF-JZKE01278268.1-ighv:0.03037)0.766:0.01419)0.324:0.01101)0.788:0.02080)0.427:0.00054,(V87RF-JZKE01255181.1-ighv:0.02577,((V101RF-JZKE01278602.1-ighv:0.05708,(V13RF-JZKE01244710.1-ighv:0.02372,V103RF-JZKE01278605.1-ighv:0.04636)0.747:0.01589)0.810:0.02090,V88RF-JZKE01255182.1-ighv:0.04737)0.748:0.01869)0.730:0.01075)0.759:0.01138,V89RF-JZKE01278248.1-ighv:0.04721)0.762:0.00903)0.746:0.01595,V95RF-JZKE01278271.1-ighv:0.03511)0.797:0.03486,(V142RF-JYKQ01245889.1-ighv:0.04809,(V228RF-AHZZ01096568.1-ighv:0.01128,(V124RF-AQIB01153511.1-ighv:0.06929,V187RF-AQIA01075832.1-ighv:0.01450)0.841:0.02173)0.771:0.01113)0.864:0.01090)0.999:0.00055)0.795:0.01120)0.769:0.01077)0.765:0.01111,V60RF-ADFV01136793.1-ighv:0.03475)0.830:0.02213,((V46RF-AJFE01045037.1-ighv:0.06602,((V108RF-AACZ03097900.1-ighv:0.0,V7RF-AJFE01011113.1-ighv:0.0):0.04530,(V152RF-CABD02117487.1-ighv:0.02292,(V107RF-AACZ03097900.1-ighv:0.00055,(V111RF-AACZ03097906.1-ighv:0.0,V50RF-AJFE01045051.1-ighv:0.0):0.01159)0.000:0.00054)0.780:0.01764)0.833:0.02240)0.729:0.01275,(((V127RF-CABD02117419.1-ighv:0.03776,(V148RF-JABR01077916.1-ighv:0.03336,(V237RF-AHZZ01103097.1-ighv:0.03747,(V188RF-AQIA01075832.1-ighv:0.03415,V143RF-JYKQ01245890.1-ighv:0.00053)0.767:0.01105)0.788:0.01721)0.851:0.02983)0.896:0.03465,((V120RF-ADFV01131951.1-ighv:0.02083,V131RF-ADFV01131961.1-ighv:0.01740)0.789:0.02078,(((V49RF-JYKQ01041718.1-ighv:0.05670,V108RF-AQIB01153501.1-ighv:0.00054)0.920:0.05025,(V84RF-JABR01004697.1-ighv:0.05677,(V96RF-AQIB01153482.1-ighv:0.02546,(V119RF-AQIB01153509.1-ighv:0.01513,(V175RF-AQIA01075814.1-ighv:0.02250,V263RF-AQIA01066387.1-ighv:0.04717)0.432:0.01848)0.420:0.02991)0.914:0.05074)0.743:0.01204)0.919:0.04291,((V123RF-ADFV01131956.1-ighv:0.06679,((((V215RF-AHZZ01090491.1-ighv:0.01120,V205RF-JYKQ01062878.1-ighv:0.02242)0.866:0.02259,(V271RF-AHZZ01125719.1-ighv:0.00055,V184RF-AQIA01075827.1-ighv:0.01113)0.992:0.08380)0.769:0.01134,((V170RF-AACZ03171037.1-ighv:0.01148,(V134RF-AGCE01148386.1-ighv:0.09891,V47RF-AJFE01045041.1-ighv:0.01155)0.759:0.01137)0.891:0.01139,(V128RF-ABGA01384193.1-ighv:0.02959,(V112RF-ADFV01131940.1-ighv:0.04210,(V128RF-AJFE01045453.1-ighv:0.05507,(V61RF-ABGA01099946.1-ighv:0.06703,(V161RF-CABD02136430.1-ighv:0.02189,(V189RF-AACZ03182257.1-ighv:0.01121,V218RF-AACZ03172648.1-ighv:0.00053)0.922:0.00054)0.949:0.04474)0.757:0.01275)0.748:0.01291)0.721:0.03300)0.887:0.03860)0.259:0.00055)0.815:0.01105,V128RF-CABD02117420.1-ighv:0.02293)0.762:0.00055)0.841:0.02454,V127RF-AJFE01045447.1-ighv:0.06928)0.771:0.01736)0.781:0.02410)0.330:0.01179)0.773:0.01447,(((V65RF-ABGA01099956.1-ighv:0.02404,(V19RF-JYKQ01005784.1-ighv:0.04155,(V25RF-AHZZ01069456.1-ighv:0.00053,V23RF-JYKQ01005789.1-ighv:0.01163)0.826:0.02596)0.459:0.02077)0.913:0.05119,(((V125RF-CABD02117398.1-ighv:0.07239,(V21RF-JABR01070187.1-ighv:0.01988,V132RF-JYKQ01245874.1-ighv:0.03451)0.756:0.01542)0.775:0.01156,(V13RF-ABGA01025810.1-ighv:0.05198,V60RF-ABGA01099946.1-ighv:0.06783)0.749:0.01041)0.777:0.01176,(V188RF-AACZ03179884.1-ighv:0.01173,V219RF-AACZ03172650.1-ighv:0.00055)0.957:0.04776)0.773:0.01677)0.667:0.01834,((((V72RF-AGCE01147944.1-ighv:0.10369,V75RF-AGCE01148057.1-ighv:0.02745)0.811:0.02737,V89RF-JABR01011024.1-ighv:0.07453)0.747:0.02769,(((V6RF-ABDC01231272.1-ighv:0.01031,V46RF-ABDC01373300.1-ighv:0.00054)0.983:0.11172,((V12RF-JZKE01244709.1-ighv:0.03841,V108RF-JZKE01278611.1-ighv:0.05523)0.215:0.03897,(V99RF-JZKE01278277.1-ighv:0.06874,V107RF-JZKE01278610.1-ighv:0.04141)0.837:0.04169)0.437:0.01900)0.858:0.03966,(V80RF-ABDC01421861.1-ighv:0.09323,(V8RF-ABDC01231277.1-ighv:0.14907,(((V149RF-JABR01077916.1-ighv:0.03019,((V164RF-JYKQ01015003.1-ighv:0.07060,((V44RF-AHZZ01098950.1-ighv:0.02189,V196RF-AQIA01075856.1-ighv:0.02689)0.868:0.02656,V186RF-AQIA01075832.1-ighv:0.00055)0.793:0.00055)0.802:0.01046,((((V82RF-AHZZ01129142.1-ighv:0.02288,V198RF-AQIA01075859.1-ighv:0.01790)0.801:0.01723,(V191RF-AQIA01075834.1-ighv:0.01750,((V218RF-AHZZ01090494.1-ighv:0.03213,(V227RF-AHZZ01096568.1-ighv:0.00054,V239RF-AHZZ01103258.1-ighv:0.02077)0.874:0.02101)0.927:0.03850,V141RF-JYKQ01245888.1-ighv:0.01842)0.834:0.02337)0.742:0.01010)0.782:0.01983,((V150RF-JABR01077917.1-ighv:0.04288,V126RF-AQIB01153517.1-ighv:0.03669)0.869:0.02897,(V261RF-AHZZ01108758.1-ighv:0.10421,(V199RF-AQIA01075860.1-ighv:0.05088,(V24RF-JABR01074704.1-ighv:0.02541,V192RF-AQIA01075844.1-ighv:0.02792)0.764:0.01452)0.778:0.00055)0.818:0.01229)0.894:0.03262)0.415:0.00054,(((V190RF-AHZZ01069461.1-ighv:0.04213,V106RF-AQIB01153492.1-ighv:0.03339)0.755:0.01242,((((V15RF-ABGA01044302.1-ighv:0.01095,V18RF-ABGA01044305.1-ighv:0.02251)0.087:0.00053,(V111RF-ABGA01313761.1-ighv:0.01124,V119RF-ADFV01131950.1-ighv:0.01117)0.799:0.01109)0.107:0.00053,(V19RF-ABGA01044306.1-ighv:0.02232,(((V150RF-CABD02117482.1-ighv:0.02182,(V109RF-AACZ03097904.1-ighv:0.00053,V49RF-AJFE01045051.1-ighv:0.01135)0.910:0.02297)0.754:0.01096,(((V17RF-ABGA01044304.1-ighv:0.00055,V14RF-ABGA01037228.1-ighv:0.01130)0.280:0.00054,(V119RF-AACZ03097916.1-ighv:0.01087,V126RF-AGCE01147923.1-ighv:0.10882)0.734:0.01188)0.879:0.02287,V32RF-ABGA01058270.1-ighv:0.09543)0.736:0.00888)0.771:0.01093,(V21RF-ABGA01044307.1-ighv:0.00595,V66RF-ABGA01104800.1-ighv:0.05021)0.785:0.01178)0.784:0.01073)0.791:0.01073)0.833:0.01069,((V269RF-AHZZ01112481.1-ighv:0.04509,V195RF-AQIA01075855.1-ighv:0.01519)0.813:0.02440,(V177RF-AACZ03171037.1-ighv:0.0,V204RF-AACZ03098100.1-ighv:0.0):0.08162)0.698:0.01453)0.026:0.00054)0.917:0.02061,((V94RF-JABR01035060.1-ighv:0.02207,V172RF-AQIA01075814.1-ighv:0.02862)0.860:0.02756,(V31RF-AHZZ01091603.1-ighv:0.05687,(V43RF-AHZZ01098942.1-ighv:0.05833,V270RF-AQIA01066387.1-ighv:0.02319)0.731:0.01016)0.911:0.03281)1.000:0.00053)0.850:0.01008)0.095:0.00054)0.876:0.02374)1.000:0.39436,((V222RF-JABR01190886.1-ighv:0.39619,((V132RF-CABD02117431.1-ighv:0.04380,V176RF-AACZ03171037.1-ighv:0.00053)0.988:0.12757,(((V55RF-JABR01089346.1-ighv:0.10111,V152RF-JABR01078980.1-ighv:0.07263)0.942:0.08712,(((V61RF-AGCE01147749.1-ighv:0.07438,(V56RF-ABGA01099940.1-ighv:0.13049,V116RF-ADFV01131946.1-ighv:0.07169)0.936:0.06773)0.956:0.07519,((V76RF-AGCE01148067.1-ighv:0.07508,(V143RF-CABD02117467.1-ighv:0.02207,(V116RF-AACZ03097906.1-ighv:0.0,V55RF-AJFE01045051.1-ighv:0.0):0.03265)0.998:0.12925)0.673:0.00371,(V130RF-JYKQ01245859.1-ighv:0.01093,V206RF-JYKQ01062881.1-ighv:0.04426)0.884:0.02177)0.130:0.01073)0.999:0.00055,(((V172RF-AACZ03171037.1-ighv:0.0,V126RF-AJFE01045444.1-ighv:0.0):0.04453,(V102RF-JABR01055994.1-ighv:0.02489,(V80RF-JYKQ01067101.1-ighv:0.04358,V129RF-AQIB01153538.1-ighv:0.02145)0.618:0.00590)0.892:0.03508)0.921:0.04369,(V125RF-AGCE01147919.1-ighv:0.08849,((V109RF-ADFV01131933.1-ighv:0.04559,((V35RF-CABD02136332.1-ighv:0.0,V142RF-CABD02117467.1-ighv:0.0):0.01152,(V115RF-AACZ03097906.1-ighv:0.0,V54RF-AJFE01045051.1-ighv:0.0):0.07259)0.888:0.03192)0.441:0.03273,(V202RF-AACZ03098097.1-ighv:0.07779,(V158RF-CABD02117766.1-ighv:0.02179,V159RF-CABD02117767.1-ighv:0.02169)0.759:0.01070)0.916:0.03346)0.666:0.00055)0.829:0.01463)0.485:0.00616)0.862:0.02209)0.734:0.01068,((V121RF-CABD02117385.1-ighv:0.01055,V205RF-AACZ03098100.1-ighv:0.00055)0.958:0.04372,(V151RF-CABD02117482.1-ighv:0.04437,V126RF-ADFV01131958.1-ighv:0.00053)0.983:0.06715)0.732:0.00986)0.946:0.08935)0.412:0.11388)0.816:0.17223,((((V9RF-JABR01052882.1-trgv:0.01045,((V76RF-AQIA01046502.1-trgv:0.0,V2RF-JYKQ01003191.1-trgv:0.0):0.03057,V1RF-AQIB01018215.1-trgv:0.01990)0.763:0.00954)0.742:0.02887,(V102RF-ADFV01046571.1-trgv:0.06666,(V100RF-ABGA01290201.1-trgv:0.04776,((V2RF-AACZ03050973.1-trgv:0.01984,V33RF-AJFE01038666.1-trgv:0.00054)0.969:0.04625,((V101RF-ABGA01290202.1-trgv:0.00054,V161RF-ABGA01132346.1-trgv:0.01014)0.776:0.01046,(V31RF-AJFE01038664.1-trgv:0.00054,V177RF-CABD02337338.1-trgv:0.03003)0.117:0.02012)0.858:0.02595)0.720:0.02079)0.728:0.01228)0.935:0.06171)0.817:0.09010,((V75RF-AQIA01046502.1-trgv:0.00970,(V1RF-AHZZ01030316.1-trgv:0.00054,(V0RF-AQIB01018214.1-trgv:0.00055,(V77RF-AQIA01046502.1-trgv:0.03015,(V1RF-JYKQ01003191.1-trgv:0.00055,V2RF-AQIB01018217.1-trgv:0.02933)0.873:0.01927)0.285:0.00987)0.828:0.02893)0.879:0.00054)0.888:0.03719,(V99RF-ABGA01290201.1-trgv:0.01106,(V179RF-CABD02337341.1-trgv:0.05295,V32RF-AJFE01038665.1-trgv:0.00918)0.962:0.05466)0.830:0.03406)0.746:0.06056)0.999:1.67783,(((((V55RF-AQIB01144282.1-igkv:0.02412,(V248RF-AQIA01017139.1-igkv:0.00985,V192RF-AACZ03015561.1-igkv:0.05120)0.766:0.01672)0.999:0.26465,((((V93RF-ABGA01285645.1-igkv:0.03513,V118RF-ABGA01321410.1-igkv:0.00053)0.732:0.01997,(((V162RF-AACZ03151858.1-igkv:0.01079,V26RF-AJFE01012249.1-igkv:0.01081)0.936:0.05655,((V194RF-AACZ03015562.1-igkv:0.10586,(((V276RF-AHZZ01189922.1-igkv:0.03694,V238RF-AQIA01017126.1-igkv:0.00054)0.977:0.08098,(V40RF-ADFV01106193.1-igkv:0.07763,(V156RF-AACZ03151855.1-igkv:0.00054,V20RF-AJFE01012236.1-igkv:0.02276)0.911:0.03889)0.515:0.03582)0.941:0.00055,((((V78RF-AHZZ01117754.1-igkv:0.0,V38RF-AQIB01144265.1-igkv:0.0):0.02198,(V41RF-JABR01076263.1-igkv:0.02222,V147RF-JYKQ01005007.1-igkv:0.00055)0.839:0.01105)0.000:0.00053,(V240RF-AHZZ01104243.1-igkv:0.06686,V229RF-AQIA01017120.1-igkv:0.00053)0.796:0.02174)0.776:0.00951,(((((V72RF-AHZZ01109398.1-igkv:0.01742,(V39RF-JABR01076263.1-igkv:0.05770,V241RF-AQIA01017128.1-igkv:0.00055)0.651:0.00629)0.839:0.02298,V238RF-AQIB01144282.1-igkv:0.11036)0.851:0.02168,((V274RF-AHZZ01185532.1-igkv:0.15477,V277RF-AQIA01075132.1-igkv:0.01507)0.299:0.01872,(V235RF-AQIA01017123.1-igkv:0.00055,(V254RF-AHZZ01106331.1-igkv:0.01108,V146RF-JYKQ01005004.1-igkv:0.00055)0.855:0.03329)0.961:0.05363)0.861:0.03075)0.758:0.01174,(V243RF-AQIA01017128.1-igkv:0.01784,V259RF-AHZZ01107395.1-igkv:0.04179)0.931:0.04501)0.773:0.01110,((V158RF-JYKQ01005032.1-igkv:0.03301,(V36RF-ADFV01106193.1-igkv:0.07287,(V52RF-AHZZ01104241.1-igkv:0.01699,V31RF-AQIB01144264.1-igkv:0.03478)0.759:0.01453)0.759:0.01114)0.972:0.06922,V55RF-AGCE01134616.1-igkv:0.06870)0.815:0.00055)0.776:0.01038)0.802:0.01276)0.670:0.01980)0.665:0.00216,V46RF-CABD02196588.1-igkv:0.01107)0.751:0.01299)0.271:0.04656,V124RF-ABGA01356726.1-igkv:0.02513)0.903:0.08381)0.985:0.15004,(((V47RF-AGCE01134604.1-igkv:0.04718,((((V39RF-AGCE01134600.1-igkv:0.08028,V144RF-ADFV01132961.1-igkv:0.17758)0.110:0.01308,(V47RF-JABR01088351.1-igkv:0.05713,V56RF-JYKQ01052451.1-igkv:0.03446)0.761:0.01569)0.868:0.03424,((V34RF-ABDC01351837.1-igkv:0.06713,V33RF-JZKE01296733.1-igkv:0.05515)0.931:0.05526,((V154RF-AACZ03151853.1-igkv:0.0,V18RF-AJFE01012235.1-igkv:0.0):0.08465,(V169RF-CABD02196547.1-igkv:0.04847,V182RF-JYKQ01052439.1-igkv:0.07508)0.380:0.03311)0.903:0.05549)0.955:0.07324)0.869:0.03333,(V138RF-ABGA01394062.1-igkv:0.04518,V147RF-ADFV01132961.1-igkv:0.04755)0.869:0.03016)0.121:0.01166)0.768:0.01250,(V43RF-AGCE01134602.1-igkv:0.06185,(((V26RF-JABR01076259.1-igkv:0.11288,(V41RF-ABDC01360666.1-igkv:0.08799,V12RF-AQIB01144240.1-igkv:0.08812)0.747:0.01661)0.868:0.02199,V47RF-AQIA01017094.1-igkv:0.02992)0.867:0.03027,(V115RF-AHZZ01042091.1-igkv:0.01995,(V151RF-AACZ03151853.1-igkv:0.00989,V16RF-AJFE01012234.1-igkv:0.00055)0.968:0.05094)0.508:0.02036)0.539:0.00054)1.000:0.00054)1.000:0.21858,(V34RF-JZKE01097728.1-igkv:0.03530,(V118RF-AGCE01134619.1-igkv:0.12998,(V73RF-AQIA01017150.1-igkv:0.00055,(V98RF-AHZZ01040808.1-igkv:0.00980,V262RF-JYKQ01187347.1-igkv:0.00951)0.922:0.01982)0.925:0.05210)0.414:0.03336)0.976:0.15529)0.907:0.07102)0.761:0.02838,((V62RF-ABDC01394567.1-igkv:0.24972,(((V53RF-AHZZ01104241.1-igkv:0.00055,V224RF-AQIA01017118.1-igkv:0.01070)0.998:0.18030,((V115RF-ABGA01318850.1-igkv:0.08235,V45RF-AQIB01144273.1-igkv:0.01015)0.892:0.02168,((V35RF-JABR01076261.1-igkv:0.05773,V51RF-AGCE01134610.1-igkv:0.09085)0.787:0.01777,((((V164RF-CABD02196515.1-igkv:0.02233,(V195RF-AACZ03015562.1-igkv:0.01105,V87RF-AJFE01002289.1-igkv:0.00055)0.000:0.00054)0.882:0.04306,((V85RF-ABGA01198108.1-igkv:0.08521,V199RF-AACZ03016143.1-igkv:0.13381)0.966:0.09019,((V141RF-ADFV01132961.1-igkv:0.03835,(V206RF-ABGA01257772.1-igkv:0.01063,((V197RF-AACZ03015754.1-igkv:0.01089,V9RF-AJFE01011588.1-igkv:0.01091)0.872:0.02208,V49RF-CABD02199693.1-igkv:0.01044)0.784:0.01072)0.785:0.01507)0.286:0.01096,((V4RF-AQIB01144236.1-igkv:0.01069,(V48RF-AQIA01017096.1-igkv:0.03201,(V48RF-JABR01088351.1-igkv:0.01046,(V117RF-AHZZ01042093.1-igkv:0.00053,V201RF-JYKQ01052450.1-igkv:0.01051)0.783:0.02174)0.548:0.00053)0.822:0.01065)0.796:0.01692,(V197RF-JYKQ01052444.1-igkv:0.02130,(V56RF-AQIA01017097.1-igkv:0.02175,V125RF-AHZZ01042093.1-igkv:0.03247)0.899:0.00054)0.979:0.07125)0.702:0.01277)0.870:0.04480)0.381:0.02933)0.707:0.02791,((((V111RF-AHZZ01042084.1-igkv:0.03437,V184RF-JYKQ01052440.1-igkv:0.00054)0.944:0.03715,((((V145RF-ADFV01132961.1-igkv:0.07162,(V63RF-AQIA01017115.1-igkv:0.09132,V54RF-JABR01088351.1-igkv:0.04621)0.752:0.01079)0.758:0.01033,(V147RF-AACZ03151853.1-igkv:0.02280,V12RF-AJFE01012232.1-igkv:0.01123)0.792:0.00213)0.000:0.00054,V171RF-CABD02196556.1-igkv:0.02176)0.899:0.02869,((V105RF-AHZZ01042080.1-igkv:0.02187,((V129RF-AHZZ01042093.1-igkv:0.04099,V59RF-AQIA01017099.1-igkv:0.06467)0.956:0.07127,V18RF-AQIB01144243.1-igkv:0.00054)0.368:0.02185)0.839:0.03236,V52RF-JABR01088351.1-igkv:0.03375)0.960:0.05605)0.000:0.00118)0.903:0.04394,(V196RF-AACZ03015564.1-igkv:0.04009,(V35RF-AQIB01144265.1-igkv:0.02166,(V31RF-JABR01076261.1-igkv:0.04094,(V56RF-AHZZ01104243.1-igkv:0.00054,(V157RF-JYKQ01005027.1-igkv:0.02187,V226RF-AQIA01017120.1-igkv:0.01078)0.784:0.01054)0.871:0.02062)0.809:0.02507)0.952:0.04464)0.744:0.01717)0.675:0.00642,(((((((((V61RF-ADFV01138112.1-igkv:0.03787,(V41RF-AGCE01134600.1-igkv:0.10464,V108RF-ADFV01106214.1-igkv:0.02294)0.777:0.01766)0.844:0.02689,(V215RF-JYKQ01076937.1-igkv:0.03429,(V234RF-AQIA01017123.1-igkv:0.02321,V44RF-AQIB01144273.1-igkv:0.04530)0.420:0.02172)0.733:0.01065)0.768:0.01314,V199RF-JYKQ01052444.1-igkv:0.03169)0.256:0.01130,(V193RF-JYKQ01052443.1-igkv:0.00053,(V212RF-AQIA01007908.1-igkv:0.02172,V14RF-AQIB01144242.1-igkv:0.02145)0.911:0.02218)0.983:0.06575)0.847:0.02202,((V0RF-CABD02043817.1-igkv:0.02033,V222RF-AACZ03178854.1-igkv:0.02029)0.196:0.00054,((V212RF-AACZ03151911.1-igkv:0.03075,(V61RF-AACZ03070936.1-igkv:0.00054,(V182RF-CABD02379503.1-igkv:0.01020,(V173RF-CABD02196901.1-igkv:0.01021,V181RF-CABD02379427.1-igkv:0.00055)0.000:0.00055)0.843:0.01019)0.436:0.01018)0.227:0.00055,((V131RF-AACZ03126842.1-igkv:0.01016,(V229RF-AACZ03179806.1-igkv:0.01031,(V211RF-AACZ03151873.1-igkv:0.00055,V230RF-AACZ03183442.1-igkv:0.01032)0.933:0.03091)0.937:0.00054)0.900:0.00055,V223RF-AACZ03179013.1-igkv:0.00055)0.000:0.00055)0.433:0.00054)0.903:0.02368)0.780:0.01362,V127RF-AHZZ01042093.1-igkv:0.02874)0.836:0.02087,(V191RF-JYKQ01052441.1-igkv:0.03307,(((V61RF-AQIA01017105.1-igkv:0.0,V134RF-AQIA01058133.1-igkv:0.0):0.02160,((V114RF-AHZZ01042085.1-igkv:0.00055,(V53RF-JABR01088351.1-igkv:0.03200,V17RF-AQIB01144243.1-igkv:0.00055)0.818:0.01067)0.000:0.00055,V108RF-AHZZ01042083.1-igkv:0.08105)0.838:0.01068)0.893:0.00055,V51RF-JABR01088351.1-igkv:0.04382)0.850:0.01798)0.870:0.02532)0.758:0.01013,V143RF-ABGA01394071.1-igkv:0.08824)0.757:0.01045,((V153RF-AACZ03151853.1-igkv:0.01088,(V120RF-ABGA01342015.1-igkv:0.00054,(V46RF-AGCE01134604.1-igkv:0.04514,V154RF-ADFV01132961.1-igkv:0.03311)0.767:0.01055)0.888:0.02129)0.914:0.04444,((V39RF-CABD02196554.1-igkv:0.01019,V170RF-CABD02196553.1-igkv:0.00055)0.754:0.01769,(V148RF-AACZ03151853.1-igkv:0.01186,V13RF-AJFE01012232.1-igkv:0.01989)0.399:0.02794)0.919:0.06338)0.907:0.04811)0.993:0.00055)0.785:0.01084)0.780:0.01095,((((V45RF-CABD02196587.1-igkv:0.02858,V163RF-AACZ03151858.1-igkv:0.04384)0.415:0.02839,((V52RF-AGCE01134612.1-igkv:0.01131,V53RF-AGCE01134613.1-igkv:0.01070)0.988:0.05568,(V142RF-ABGA01394068.1-igkv:0.01899,(V193RF-AACZ03015562.1-igkv:0.0,V129RF-AJFE01047586.1-igkv:0.0):0.04399)0.634:0.00368)1.000:0.00054)0.882:0.01074,(((V21RF-AQIB01144251.1-igkv:0.03378,((((V14RF-AJFE01012232.1-igkv:0.06012,(V164RF-ABGA01161530.1-igkv:0.02163,V150RF-ADFV01132961.1-igkv:0.04439)0.764:0.01126)0.883:0.02189,V188RF-JYKQ01052440.1-igkv:0.01063)0.555:0.02269,V67RF-AQIA01017115.1-igkv:0.00055)0.892:0.03080,V148RF-ADFV01132961.1-igkv:0.14859)0.665:0.00382)0.755:0.01464,(((V215RF-AQIA01017118.1-igkv:0.00054,(V101RF-AHZZ01042078.1-igkv:0.01072,V190RF-JYKQ01052440.1-igkv:0.04228)0.977:0.05527)0.892:0.02182,V22RF-AQIB01144257.1-igkv:0.01108)0.763:0.01084,V104RF-JABR01061517.1-igkv:0.03344)0.911:0.04209)0.552:0.02738,((V3RF-ABDC01165520.1-igkv:0.0,V110RF-ABDC01522041.1-igkv:0.0):0.15236,V5RF-JZKE01218258.1-igkv:0.10328)0.775:0.05632)0.749:0.05370)0.761:0.01138,((((((((((V42RF-ADFV01106195.1-igkv:0.02314,(V167RF-ABGA01180644.1-igkv:0.03289,(V233RF-AQIA01017123.1-igkv:0.00054,(V252RF-AHZZ01106331.1-igkv:0.00055,V149RF-JYKQ01005013.1-igkv:0.01076)0.924:0.01100)0.915:0.03403)0.916:0.03356)0.000:0.00054,V158RF-AACZ03151855.1-igkv:0.00055)0.856:0.01085,((V125RF-ABGA01356729.1-igkv:0.03269,((V121RF-ABGA01356721.1-igkv:0.02138,(V166RF-ABGA01180641.1-igkv:0.01063,V168RF-ABGA01180644.1-igkv:0.01095)0.977:0.04501)0.479:0.00054,((V57RF-AHZZ01104243.1-igkv:0.0,V227RF-AQIA01017120.1-igkv:0.0,V156RF-JYKQ01005026.1-igkv:0.0):0.00055,V36RF-AQIB01144265.1-igkv:0.01129)0.990:0.05793)0.385:0.01071)0.991:0.00054,(((((V246RF-AQIA01017135.1-igkv:0.01909,V150RF-AQIB01156901.1-igkv:0.00494)0.946:0.05298,((((V48RF-AQIB01144274.1-igkv:0.02143,(V221RF-JYKQ01081225.1-igkv:0.03120,(V71RF-AHZZ01109397.1-igkv:0.01081,V51RF-JYKQ01051981.1-igkv:0.00055)0.939:0.04475)0.860:0.02870)0.826:0.01729,((V178RF-JYKQ01044654.1-igkv:0.01067,(V244RF-AQIA01017130.1-igkv:0.04615,V245RF-AQIA01017133.1-igkv:0.00053)0.913:0.01044)0.805:0.01073,(V87RF-AHZZ01176978.1-igkv:0.02134,(V263RF-AHZZ01111138.1-igkv:0.0,V266RF-AHZZ01111367.1-igkv:0.0):0.00055)0.863:0.01064)0.871:0.00054)0.714:0.01384,(V117RF-ABGA01321409.1-igkv:0.00055,V209RF-ABGA01276916.1-igkv:0.02211)0.977:0.05446)0.821:0.01810,(V50RF-AQIB01144276.1-igkv:0.03371,V262RF-AHZZ01110488.1-igkv:0.03244)0.644:0.00420)0.905:0.02864)0.871:0.00054,((V52RF-AQIB01144276.1-igkv:0.03302,(V45RF-JABR01076266.1-igkv:0.01839,(V44RF-JABR01076266.1-igkv:0.00055,V53RF-AQIB01144276.1-igkv:0.04371)0.852:0.02710)0.434:0.01102)0.553:0.00054,((V54RF-AGCE01134614.1-igkv:0.04286,V57RF-AGCE01134616.1-igkv:0.00054)0.808:0.03922,(V40RF-JABR01076263.1-igkv:0.00054,(V275RF-AHZZ01189918.1-igkv:0.01120,V214RF-JYKQ01076935.1-igkv:0.01051)0.990:0.05592)0.793:0.01993)0.208:0.01461)0.807:0.02745)0.824:0.01052,V38RF-JABR01076263.1-igkv:0.00055)0.772:0.01190,V43RF-ADFV01106195.1-igkv:0.04240)0.261:0.02198)0.837:0.01067)0.000:0.00054,((V40RF-CABD02196563.1-igkv:0.01077,V161RF-AACZ03151857.1-igkv:0.04388)0.754:0.01152,(V94RF-ABGA01285648.1-igkv:0.05100,V42RF-AGCE01134600.1-igkv:0.10039)0.786:0.01786)0.881:0.02142)0.423:0.00054,(V190RF-AACZ03015561.1-igkv:0.02247,(V163RF-CABD02196513.1-igkv:0.03306,V165RF-AACZ03151979.1-igkv:0.03169)0.757:0.01483)0.960:0.05534)0.774:0.01098,((V48RF-CABD02196595.1-igkv:0.0,V88RF-AJFE01002352.1-igkv:0.0):0.06871,V41RF-ADFV01106195.1-igkv:0.02241)0.758:0.00987)0.300:0.01077,(V213RF-JYKQ01075085.1-igkv:0.03260,(V268RF-AHZZ01111367.1-igkv:0.01073,((V260RF-AHZZ01107399.1-igkv:0.00055,V180RF-JYKQ01044662.1-igkv:0.01085)0.959:0.03272,V265RF-AHZZ01111138.1-igkv:0.02162)0.000:0.00055)0.765:0.00054)0.956:0.04346)0.864:0.00054,((((V33RF-JABR01076261.1-igkv:0.00054,V36RF-JABR01076263.1-igkv:0.05649)0.703:0.03349,((V216RF-JYKQ01076937.1-igkv:0.01156,(V277RF-AHZZ01189923.1-igkv:0.04579,V237RF-AQIA01017126.1-igkv:0.05745)0.751:0.00996)0.894:0.03237,(V242RF-AQIA01017128.1-igkv:0.01032,((V150RF-JYKQ01005014.1-igkv:0.01070,((V232RF-AQIA01017123.1-igkv:0.02219,V236RF-AQIA01017125.1-igkv:0.00054)0.923:0.02213,(V251RF-AHZZ01106331.1-igkv:0.00055,V41RF-AQIB01144269.1-igkv:0.02228)0.000:0.00055)0.868:0.01074)0.873:0.00055,V69RF-AHZZ01109397.1-igkv:0.03444)0.450:0.02231)0.881:0.03158)0.765:0.01701)1.000:0.00056,(((V239RF-AQIA01017128.1-igkv:0.02864,(V37RF-AQIB01144265.1-igkv:0.03294,(V166RF-CABD02196521.1-igkv:0.02815,(V157RF-AACZ03151855.1-igkv:0.00055,V23RF-AJFE01012238.1-igkv:0.01070)0.869:0.02679)0.482:0.02028)0.815:0.02328)0.803:0.01724,(V148RF-JYKQ01005012.1-igkv:0.02248,(V228RF-AQIA01017120.1-igkv:0.00054,V253RF-AHZZ01106331.1-igkv:0.04372)0.750:0.00062)0.985:0.01082)0.394:0.01075,(V155RF-JYKQ01005022.1-igkv:0.01066,(V77RF-AHZZ01117753.1-igkv:0.04373,V153RF-JYKQ01005018.1-igkv:0.00054)0.948:0.03273)0.660:0.00054)0.879:0.01001)0.919:0.01023,(V39RF-ADFV01106193.1-igkv:0.04469,((V123RF-ABGA01356724.1-igkv:0.01286,(V44RF-CABD02196586.1-igkv:0.01513,(V160RF-AACZ03151857.1-igkv:0.0,V25RF-AJFE01012245.1-igkv:0.0):0.04064)0.748:0.03241)0.830:0.01977,(V230RF-AQIA01017120.1-igkv:0.01096,V39RF-AQIB01144265.1-igkv:0.03254)0.918:0.03288)0.220:0.01050)0.480:0.00054)0.874:0.01130)0.645:0.00055,V95RF-ABGA01285649.1-igkv:0.04468)1.000:0.00053,(V42RF-AQIB01144273.1-igkv:0.09205,(V61RF-AHZZ01105091.1-igkv:0.02185,V53RF-JYKQ01051984.1-igkv:0.09067)0.844:0.03445)0.341:0.02207)0.435:0.01049)0.773:0.01079)0.787:0.01106)0.658:0.00053)0.599:0.04402)0.326:0.02935,(V97RF-AHZZ01040807.1-igkv:0.00868,V71RF-AQIA01017140.1-igkv:0.01355)0.968:0.12073)0.854:0.05483)0.954:0.14242,((V222RF-AQIA01017118.1-igkv:0.00054,(V160RF-JYKQ01005033.1-igkv:0.01051,V30RF-AQIB01144264.1-igkv:0.00054)0.928:0.01000)0.993:0.15547,((V55RF-AHZZ01104243.1-igkv:0.0,V225RF-AQIA01017120.1-igkv:0.0):0.01139,V34RF-AQIB01144265.1-igkv:0.00055)0.951:0.08402)0.968:0.13141)0.879:0.09748)0.483:0.03605)0.477:0.06104,(V129RF-JYKQ01187337.1-igkv:0.00055,(V8RF-AHZZ01040804.1-igkv:0.00055,V56RF-AQIB01144282.1-igkv:0.03368)0.837:0.01062)0.978:0.17545)0.958:0.24742,(((((V113RF-AGCE01112648.1-iglv:0.11285,(V121RF-JABR01071856.1-iglv:0.05585,((V14RF-AQIA01007576.1-iglv:0.03242,V83RF-AQIB01146137.1-iglv:0.01012)0.876:0.01995,((V135RF-AACZ03127131.1-iglv:0.0,V92RF-AJFE01010827.1-iglv:0.0):0.03218,V185RF-ABGA01252219.1-iglv:0.04130)0.754:0.00915)0.772:0.01886)0.823:0.02916)0.832:0.04745,((V94RF-ABDC01449636.1-iglv:0.00055,(V29RF-ABDC01349230.1-iglv:0.01008,V56RF-ABDC01384523.1-iglv:0.00055)0.905:0.04087)0.966:0.12356,(V27RF-ABDC01349227.1-iglv:0.09187,V27RF-JZKE01249957.1-iglv:0.04929)0.009:0.04891)0.899:0.09291)0.929:0.10935,(((V71RF-CABD02231431.1-iglv:0.01085,(V144RF-AACZ03127143.1-iglv:0.0,V98RF-AJFE01017581.1-iglv:0.0):0.01186)0.920:0.07745,(V31RF-JZKE01249959.1-iglv:0.06649,(V112RF-AGCE01112648.1-iglv:0.07196,(V54RF-ADFV01126759.1-iglv:0.03300,(((V288RF-AHZZ01198553.1-iglv:0.03107,V16RF-AQIA01007576.1-iglv:0.00054)0.914:0.03205,(V9RF-AQIA01007576.1-iglv:0.03101,(V244RF-AHZZ01105199.1-iglv:0.02025,(V233RF-JYKQ01126546.1-iglv:0.06506,(V126RF-JABR01071856.1-iglv:0.01099,V235RF-JYKQ01126546.1-iglv:0.04008)0.850:0.04175)0.473:0.01147)0.753:0.01269)0.901:0.03856)0.907:0.03652,((V183RF-ABGA01252219.1-iglv:0.00055,V184RF-ABGA01252219.1-iglv:0.00961)0.987:0.05274,((V182RF-ABGA01252218.1-iglv:0.08248,V68RF-CABD02231422.1-iglv:0.02133)0.873:0.04074,(V134RF-AACZ03127131.1-iglv:0.01736,(V91RF-AJFE01010827.1-iglv:0.01164,V94RF-AJFE01010828.1-iglv:0.02879)0.751:0.02847)0.816:0.03379)0.592:0.00053)0.870:0.02379)0.805:0.01792)0.921:0.04969)0.892:0.04578)0.915:0.06607)0.788:0.04614,(((((V284RF-AHZZ01198551.1-iglv:0.04183,(V114RF-JABR01071855.1-iglv:0.04181,V4RF-AQIA01007574.1-iglv:0.00054)0.760:0.00997)0.888:0.02930,(V69RF-CABD02231427.1-iglv:0.02795,(V180RF-ABGA01252215.1-iglv:0.02815,(V140RF-AACZ03127139.1-iglv:0.0,V100RF-AJFE01017584.1-iglv:0.0):0.01206)0.411:0.01009)0.671:0.00509)0.517:0.02405,V56RF-ADFV01126760.1-iglv:0.03769)0.832:0.03363,(V81RF-AQIB01146137.1-iglv:0.17980,(V61RF-CABD02231410.1-iglv:0.00054,(V132RF-AACZ03127129.1-iglv:0.0,V95RF-AJFE01010829.1-iglv:0.0):0.02019)0.873:0.05931)0.912:0.07984)0.693:0.02367,(V287RF-AHZZ01198553.1-iglv:0.05489,(V133RF-AACZ03127129.1-iglv:0.00902,(V62RF-CABD02231415.1-iglv:0.04135,V136RF-AACZ03127135.1-iglv:0.01008)0.883:0.02152)0.845:0.02078)0.860:0.03732)0.933:0.07355)0.886:0.07835)0.994:0.22763,(((V82RF-JZKE01238797.1-iglv:0.09111,(V20RF-ABDC01318810.1-iglv:0.02533,(V81RF-ABDC01422153.1-iglv:0.0,V96RF-ABDC01466438.1-iglv:0.0):0.05038)0.893:0.04470)0.945:0.07481,((V121RF-AGCE01135277.1-iglv:0.14050,((V140RF-JABR01071862.1-iglv:0.11391,(((V57RF-CABD02231362.1-iglv:0.00055,(V184RF-AACZ03176953.1-iglv:0.01942,V107RF-AJFE01020631.1-iglv:0.01942)0.875:0.02014)0.781:0.00985,V59RF-CABD02231364.1-iglv:0.00972)0.869:0.02226,(((V64RF-AQIB01146122.1-iglv:0.03889,((V214RF-AHZZ01089508.1-iglv:0.00055,V28RF-AQIA01007588.1-iglv:0.01990)0.874:0.03117,V258RF-JYKQ01126589.1-iglv:0.01014)0.766:0.01337)0.768:0.03128,((V127RF-JABR01071859.1-iglv:0.01335,(V18RF-AQIA01007584.1-iglv:0.00055,(V208RF-AHZZ01089506.1-iglv:0.00953,V74RF-AQIB01146123.1-iglv:0.04099)0.760:0.00965)0.951:0.04717)0.981:0.07313,((V27RF-AQIA01007587.1-iglv:0.01565,(V250RF-JYKQ01126585.1-iglv:0.02029,V68RF-AQIB01146122.1-iglv:0.04028)0.790:0.01525)0.755:0.00939,V4RF-JABR01016432.1-iglv:0.03926)0.661:0.02037)0.647:0.00907)0.534:0.01855,((V194RF-ABGA01252241.1-iglv:0.03046,V197RF-ABGA01252243.1-iglv:0.01015)0.924:0.03219,((V46RF-ADFV01126738.1-iglv:0.03236,(V50RF-ADFV01126742.1-iglv:0.01018,V140RF-ADFV01132918.1-iglv:0.03011)0.888:0.02038)0.738:0.01021,((V82RF-JABR01189674.1-iglv:0.0,V137RF-JABR01071862.1-iglv:0.0):0.09476,V134RF-JABR01071861.1-iglv:0.02938)0.766:0.01738)0.870:0.02165)0.761:0.01040)0.860:0.02180)0.780:0.01588)0.916:0.04053,((V204RF-AHZZ01089506.1-iglv:0.02027,(V196RF-ABGA01252243.1-iglv:0.04718,(V115RF-AGCE01112674.1-iglv:0.18573,(V54RF-CABD02231359.1-iglv:0.0,V112RF-AJFE01020634.1-iglv:0.0):0.01582)0.159:0.01251)0.965:0.06822)0.783:0.02146,V22RF-AQIA01007586.1-iglv:0.08937)0.942:0.05615)0.892:0.03647)0.315:0.02506,(((V131RF-JABR01071860.1-iglv:0.06657,(V248RF-JYKQ01126581.1-iglv:0.03461,V71RF-AQIB01146122.1-iglv:0.02914)0.093:0.02359)0.804:0.02631,((V32RF-AQIA01007589.1-iglv:0.01001,V255RF-JYKQ01126589.1-iglv:0.00982)0.337:0.00054,(V48RF-AHZZ01099973.1-iglv:0.00488,(V25RF-AQIA01007586.1-iglv:0.03103,(V132RF-JABR01071860.1-iglv:0.01063,V138RF-JABR01071862.1-iglv:0.03357)0.567:0.01217)0.550:0.03243)0.878:0.02641)0.552:0.01228)0.795:0.01611,((V205RF-AHZZ01089506.1-iglv:0.00055,V24RF-AQIA01007586.1-iglv:0.01071)0.974:0.04396,((((V61RF-AQIB01146122.1-iglv:0.03105,V72RF-AQIB01146122.1-iglv:0.03168)0.761:0.01411,(V105RF-AJFE01020628.1-iglv:0.03416,(V206RF-AHZZ01089506.1-iglv:0.03061,V245RF-JYKQ01126580.1-iglv:0.01013)0.903:0.03704)0.203:0.01021)0.779:0.01673,V244RF-JYKQ01126580.1-iglv:0.02076)0.744:0.01046,V23RF-AQIA01007586.1-iglv:0.07337)0.762:0.01044)0.843:0.01972)0.746:0.01616)0.730:0.05018)0.936:0.07191,(((V115RF-JABR01071855.1-iglv:0.04877,((V46RF-AQIA01009608.1-iglv:0.02860,(V243RF-AHZZ01105199.1-iglv:0.02659,V84RF-AQIB01146138.1-iglv:0.05434)0.764:0.01186)0.994:0.09219,(((((V241RF-AHZZ01105198.1-iglv:0.00054,(V11RF-AQIA01007576.1-iglv:0.02106,(V124RF-JABR01071856.1-iglv:0.02123,V52RF-ADFV01126756.1-iglv:0.03130)0.855:0.00054)0.927:0.02793)0.751:0.00055,V181RF-ABGA01252216.1-iglv:0.07452)0.668:0.00948,(V113RF-JABR01071855.1-iglv:0.00055,V119RF-JABR01071856.1-iglv:0.03124)0.975:0.06256)0.767:0.01182,(((((V240RF-JYKQ01126546.1-iglv:0.00918,(V187RF-ABGA01252219.1-iglv:0.01074,(V186RF-ABGA01252219.1-iglv:0.03134,(V188RF-ABGA01252219.1-iglv:0.01922,V221RF-AACZ03177116.1-iglv:0.04210)0.856:0.02205)0.000:0.00053)0.949:0.04056)0.883:0.01046,((V67RF-CABD02231421.1-iglv:0.05415,(V66RF-CABD02231419.1-iglv:0.03017,V93RF-AJFE01010827.1-iglv:0.03951)0.349:0.00996)0.511:0.00053,(V76RF-AQIB01146133.1-iglv:0.01052,(V249RF-AHZZ01105201.1-iglv:0.01396,(V232RF-JYKQ01126546.1-iglv:0.01066,(V43RF-AQIA01009600.1-iglv:0.01055,V80RF-AQIB01146136.1-iglv:0.03216)0.781:0.01077)0.774:0.00979)0.791:0.01649)0.882:0.01978)0.947:0.00055)0.270:0.02886,(V289RF-AHZZ01198553.1-iglv:0.00974,(V226RF-JYKQ01126545.1-iglv:0.00970,(V6RF-AQIA01007574.1-iglv:0.00053,(((V281RF-AHZZ01198550.1-iglv:0.0,V229RF-JYKQ01126545.1-iglv:0.0):0.02046,V86RF-AQIB01146140.1-iglv:0.01286)0.446:0.01300,(V2RF-AQIA01007574.1-iglv:0.00055,V90RF-AQIB01146141.1-iglv:0.02058)0.908:0.02049)0.800:0.00055)0.884:0.01329)0.000:0.00055)0.993:0.00054)0.439:0.01978,((V237RF-JYKQ01126546.1-iglv:0.05349,V7RF-AQIA01007575.1-iglv:0.01037)0.315:0.00054,V87RF-AQIB01146140.1-iglv:0.01002)0.771:0.00993)0.782:0.01016,((V139RF-AACZ03127139.1-iglv:0.01028,(V111RF-JABR01071855.1-iglv:0.02140,(V231RF-AACZ03191230.1-iglv:0.0,V102RF-AJFE01017586.1-iglv:0.0):0.00054)0.766:0.01028)0.955:0.04835,((V142RF-AACZ03127139.1-iglv:0.00977,V101RF-AJFE01017584.1-iglv:0.00977)0.742:0.01000,(V70RF-CABD02231427.1-iglv:0.01988,V177RF-ABGA01252206.1-iglv:0.06141)0.908:0.02981)0.794:0.01684)0.793:0.01619)0.843:0.00054)0.881:0.02163,V283RF-AHZZ01198551.1-iglv:0.05617)0.638:0.01743)0.167:0.00055)0.783:0.02399,V230RF-JYKQ01126545.1-iglv:0.13031)0.990:0.15650,((((V83RF-JZKE01238797.1-iglv:0.01006,(V21RF-JZKE01249944.1-iglv:0.01908,V77RF-ABDC01418168.1-iglv:0.11793)0.828:0.03609)0.781:0.01000,((V158RF-ABDC01540867.1-iglv:0.0,V162RF-ABDC01624510.1-iglv:0.0):0.03103,(V14RF-ABDC01296165.1-iglv:0.02069,(V37RF-ABDC01359388.1-iglv:0.0,V149RF-ABDC01465190.1-iglv:0.0):0.03016)0.882:0.02244)0.748:0.00905)1.000:0.00054,(((V24RF-ABDC01342328.1-iglv:0.04158,V145RF-ABDC01425625.1-iglv:0.02115)0.932:0.04128,(V90RF-ABDC01442374.1-iglv:0.09422,V75RF-ABDC01417539.1-iglv:0.07424)0.643:0.00769)0.866:0.02666,V84RF-JZKE01238799.1-iglv:0.00722)0.856:0.01238)0.751:0.03303,(((V78RF-JYKQ01062966.1-iglv:0.01925,(V59RF-AQIB01146122.1-iglv:0.03036,V35RF-AQIA01007590.1-iglv:0.02011)0.761:0.00994)0.791:0.01601,(((V200RF-ABGA01252248.1-iglv:0.05626,V145RF-JABR01077601.1-iglv:0.05079)0.204:0.01117,(V39RF-AQIA01007600.1-iglv:0.01350,(V34RF-AHZZ01097949.1-iglv:0.00957,V219RF-JYKQ01080923.1-iglv:0.00971)0.834:0.01789)0.771:0.01447)0.791:0.01713,V45RF-AHZZ01099970.1-iglv:0.00937)0.789:0.01816)0.961:0.05984,(V143RF-JABR01077601.1-iglv:0.06204,(V52RF-CABD02231318.1-iglv:0.00054,(V115RF-AJFE01022796.1-iglv:0.04027,(V187RF-AACZ03176987.1-iglv:0.01923,V207RF-AACZ03127313.1-iglv:0.00055)0.052:0.00948)0.776:0.00967)0.886:0.02909)0.751:0.02041)0.871:0.03999)0.999:0.18906)0.760:0.02179)0.911:0.10734)0.776:0.06573,(((V119RF-ABGA01335280.1-iglv:0.02851,(V50RF-CABD02231299.1-iglv:0.00054,(V210RF-AACZ03127321.1-iglv:0.0,V117RF-AJFE01022798.1-iglv:0.0):0.04087)0.882:0.02399)0.694:0.00833,(V128RF-AGCE01147939.1-iglv:0.06829,((V41RF-AQIA01007605.1-iglv:0.00995,((V32RF-AHZZ01097944.1-iglv:0.0,V84RF-JYKQ01114545.1-iglv:0.0):0.01979,V6RF-JABR01043229.1-iglv:0.05452)0.768:0.01009)0.771:0.01019,V147RF-JABR01077603.1-iglv:0.04092)0.744:0.01311)0.656:0.02086)1.000:0.49694,((V209RF-AACZ03127321.1-iglv:0.0,V116RF-AJFE01022798.1-iglv:0.0):0.44180,((V19RF-JZKE01249933.1-iglv:0.02169,(((V257RF-JYKQ01126589.1-iglv:0.02137,(V213RF-AHZZ01089508.1-iglv:0.04857,(V34RF-AQIA01007589.1-iglv:0.00968,V139RF-JABR01071862.1-iglv:0.03222)0.804:0.02155)0.755:0.01052)0.521:0.00392,(V109RF-AJFE01020631.1-iglv:0.03468,(V45RF-ADFV01126738.1-iglv:0.02266,V111RF-AJFE01020632.1-iglv:0.07851)0.759:0.03031)0.757:0.03723)0.384:0.01509,((((V21RF-AQIA01007586.1-iglv:0.01024,V70RF-AQIB01146122.1-iglv:0.01056)0.892:0.02095,V246RF-JYKQ01126581.1-iglv:0.00055)0.939:0.00054,V73RF-AQIB01146122.1-iglv:0.13021)0.418:0.02106,V203RF-AHZZ01089506.1-iglv:0.01072)0.893:0.03405)0.983:0.08044)0.794:0.02072,V85RF-JZKE01238800.1-iglv:0.00054)0.963:0.23635)0.952:0.27005)0.869:0.08424)0.878:0.13609)0.937:0.26036,(((((V57RF-ABDC01388284.1-trav:0.12545,((((V73RF-ADFV01192038.1-trav:0.04046,(V10RF-CABD02105588.1-trav:0.00054,(V83RF-AACZ03097614.1-trav:0.02197,V68RF-AJFE01069975.1-trav:0.00055)0.917:0.01099)0.679:0.00596)0.817:0.02655,(V65RF-JYKQ01054942.1-trav:0.00055,(V204RF-JABR01098600.1-trav:0.05767,(V101RF-AGCE01026530.1-trav:0.07680,(V63RF-AHZZ01107544.1-trav:0.01139,V144RF-AQIA01064146.1-trav:0.02260)0.435:0.01136)0.185:0.00054)0.741:0.01062)0.974:0.06347)0.953:0.06512,((V103RF-AGCE01026531.1-trav:0.02754,((V156RF-ABGA01083939.1-trav:0.01111,((V80RF-AACZ03097613.1-trav:0.0,V65RF-AJFE01069975.1-trav:0.0):0.01123,(V69RF-ADFV01192037.1-trav:0.02272,V7RF-CABD02105584.1-trav:0.00055)0.000:0.00055)0.801:0.01124)0.763:0.01189,((V211RF-JABR01098603.1-trav:0.0,V141RF-AQIA01064144.1-trav:0.0):0.00055,(V91RF-AHZZ01198216.1-trav:0.00055,V62RF-JYKQ01054940.1-trav:0.00977)0.911:0.00949)0.846:0.02043)0.438:0.02998)1.000:0.13970,(V97RF-AGCE01026529.1-trav:0.07734,((V78RF-ADFV01192039.1-trav:0.03384,(V14RF-CABD02105592.1-trav:0.01111,(V73RF-AJFE01069976.1-trav:0.02243,V88RF-AACZ03097619.1-trav:0.01115)0.000:0.00053)0.790:0.01108)0.756:0.01126,(V136RF-ABGA01387833.1-trav:0.05759,((V227RF-AQIB01128644.1-trav:0.01118,((V150RF-AQIA01064146.1-trav:0.0,V233RF-AQIB01128644.1-trav:0.0):0.00055,V71RF-JYKQ01054942.1-trav:0.01108)0.000:0.00055)0.000:0.00053,(V35RF-AHZZ01098200.1-trav:0.02223,V202RF-JABR01098599.1-trav:0.02231)0.791:0.01118)0.903:0.03396)0.768:0.01083)0.929:0.03930)0.977:0.08498)0.703:0.02238)0.979:0.10208,((V54RF-ABDC01379531.1-trav:0.0,V104RF-ABDC01491653.1-trav:0.0):0.09523,(V56RF-JZKE01143895.1-trav:0.05756,(V60RF-JZKE01143896.1-trav:0.01980,V61RF-JZKE01143902.1-trav:0.01131)0.694:0.00054)0.890:0.02073)0.758:0.01228)0.830:0.03901)0.992:0.40141,(((V5RF-AHZZ01035404.1-trav:0.00055,((V206RF-AQIB01128636.1-trav:0.02324,((V100RF-ADFV01192050.1-trav:0.03539,(((V68RF-AACZ03095319.1-trav:0.00055,V123RF-AJFE01024276.1-trav:0.01149)0.930:0.02326,V30RF-CABD02105628.1-trav:0.02315)0.000:0.00054,V237RF-ABGA01321068.1-trav:0.00053)0.812:0.00055)0.968:0.03521,V99RF-JABR01039937.1-trav:0.04661)0.000:0.00054)0.894:0.01151,(V171RF-AQIA01064166.1-trav:0.0,V126RF-JYKQ01135389.1-trav:0.0):0.00054)0.831:0.01122)1.000:0.56507,(((V215RF-JABR01098604.1-trav:0.01945,(V66RF-ADFV01192035.1-trav:0.03336,(V77RF-AACZ03097613.1-trav:0.00055,V61RF-AJFE01069975.1-trav:0.01098)0.737:0.01087)0.834:0.04891)1.000:0.46573,(V90RF-AJFE01010527.1-trav:0.53511,((V220RF-AHZZ01093946.1-trav:0.06727,((V65RF-AACZ03095314.1-trav:0.0,V121RF-AJFE01024276.1-trav:0.0):0.00054,V215RF-AACZ03171149.1-trav:0.04393)0.401:0.01935)0.916:0.08748,(V116RF-ABDC01542818.1-trav:0.08652,V38RF-JZKE01143869.1-trav:0.01198)0.868:0.07532)0.995:0.41008)0.573:0.09692)0.514:0.05096,((V156RF-AQIA01064151.1-trav:0.0,V217RF-AQIB01128642.1-trav:0.0):0.02086,((V17RF-CABD02105602.1-trav:0.0,V78RF-AJFE01069977.1-trav:0.0):0.00054,V93RF-AACZ03097619.1-trav:0.01173)0.757:0.01476)0.997:0.36548)0.796:0.07699)0.815:0.08323,((((V63RF-AACZ03095312.1-trav:0.64014,(V221RF-AHZZ01093949.1-trav:0.00930,V163RF-AQIA01064165.1-trav:0.02067)0.996:0.52888)0.960:0.35006,(V76RF-JZKE01143916.1-trav:0.13623,(V158RF-ABGA01113129.1-trav:0.03297,(V65RF-ADFV01192035.1-trav:0.01118,(V76RF-AACZ03097613.1-trav:0.0,V178RF-AACZ03171395.1-trav:0.0,V60RF-AJFE01069975.1-trav:0.0):0.02211)0.087:0.00054)0.935:0.12945)0.993:0.24607)0.664:0.03530,(V53RF-JZKE01143893.1-trav:0.10425,(V94RF-AGCE01026527.1-trav:0.16196,((V199RF-JABR01098598.1-trav:0.02998,(V153RF-AQIA01064148.1-trav:0.00981,(V236RF-AQIB01128644.1-trav:0.01971,(V37RF-AHZZ01098200.1-trav:0.00995,V73RF-JYKQ01054953.1-trav:0.00055)0.000:0.00054)0.828:0.00982)0.865:0.00055)0.885:0.02062,(((V129RF-ABGA01386446.1-trav:0.0,V15RF-CABD02105596.1-trav:0.0):0.00053,(V90RF-AACZ03097619.1-trav:0.0,V75RF-AJFE01069976.1-trav:0.0):0.00997)0.786:0.00824,V80RF-ADFV01192039.1-trav:0.07253)0.758:0.01127)0.786:0.02935)0.783:0.06622)0.993:0.19810)0.931:0.18668,((V18RF-CABD02105602.1-trav:0.02851,V88RF-AGCE01026522.1-trav:0.03209)0.999:0.47753,(V63RF-JZKE01143910.1-trav:0.05559,(((V155RF-ABGA01083939.1-trav:0.01009,V64RF-AJFE01069975.1-trav:0.01011)0.000:0.00055,(V79RF-AACZ03097613.1-trav:0.00055,V6RF-CABD02105581.1-trav:0.01008)0.000:0.00055)0.369:0.00055,((V217RF-JABR01098604.1-trav:0.01868,(((V90RF-AHZZ01198214.1-trav:0.0,V140RF-AQIA01064138.1-trav:0.0):0.00055,V226RF-AQIB01128644.1-trav:0.03071)0.815:0.01011,V61RF-JYKQ01054940.1-trav:0.01012)0.711:0.00481)0.782:0.01716,V68RF-ADFV01192037.1-trav:0.02090)0.805:0.01002)0.945:0.11181)0.997:0.41444)0.191:0.06441)0.867:0.13533)0.909:0.18311)0.238:0.08069,(((V70RF-JZKE01143915.1-trav:0.12736,(V100RF-AGCE01026530.1-trav:0.12678,((V62RF-AHZZ01107544.1-trav:0.01052,((V210RF-JABR01098601.1-trav:0.02135,V64RF-JYKQ01054942.1-trav:0.01074)0.776:0.01073,V143RF-AQIA01064146.1-trav:0.01067)0.995:0.00054)0.860:0.01930,(V152RF-ABGA01083937.1-trav:0.01222,(V82RF-AACZ03097614.1-trav:0.01072,V67RF-AJFE01069975.1-trav:0.00055)0.980:0.06555)0.422:0.01777)0.859:0.03068)0.958:0.08087)0.847:0.05128,(((V207RF-JABR01098600.1-trav:0.01041,(V147RF-AQIA01064146.1-trav:0.02111,(V68RF-JYKQ01054942.1-trav:0.01044,(V65RF-AHZZ01107544.1-trav:0.0,V230RF-AQIB01128644.1-trav:0.0):0.00055)0.000:0.00055)0.899:0.02167)0.912:0.03720,(V75RF-ADFV01192038.1-trav:0.02119,(V150RF-ABGA01083932.1-trav:0.04239,(V11RF-CABD02105589.1-trav:0.01042,V70RF-AJFE01069976.1-trav:0.00055)0.904:0.02097)0.823:0.00054)0.843:0.02902)0.985:0.11125,(V79RF-ABDC01418428.1-trav:0.12500,V58RF-JZKE01143896.1-trav:0.17446)0.919:0.04964)0.876:0.04250)0.893:0.10579,((V51RF-ABDC01377653.1-trav:0.12421,V75RF-JZKE01143916.1-trav:0.02317)0.699:0.09751,(V105RF-AGCE01026534.1-trav:0.17532,(V3RF-CABD02105570.1-trav:0.02143,((V75RF-AACZ03097612.1-trav:0.00054,(((V213RF-JABR01098604.1-trav:0.00054,V223RF-AQIB01128644.1-trav:0.02189)0.744:0.00054,(V137RF-AQIA01064137.1-trav:0.01103,(V88RF-AHZZ01198213.1-trav:0.00055,V59RF-JYKQ01054933.1-trav:0.01076)0.933:0.03306)0.444:0.01094)0.891:0.03375,(V64RF-ADFV01192035.1-trav:0.02174,V159RF-ABGA01113130.1-trav:0.03319)0.000:0.00055)0.861:0.01071)0.000:0.00055,V59RF-AJFE01069975.1-trav:0.01072)0.876:0.02144)0.763:0.01411)0.977:0.14067)0.838:0.13417)0.987:0.25875)0.968:0.31125,((V23RF-CABD02105615.1-trav:0.00054,V90RF-ADFV01192042.1-trav:0.01019)1.000:1.66334,((((V160RF-ABGA01113133.1-trav:0.03836,V63RF-ADFV01192035.1-trav:0.03287)0.972:0.20698,((V99RF-AGCE01026530.1-trav:0.00318,((V81RF-AACZ03097613.1-trav:0.0,V66RF-AJFE01069975.1-trav:0.0):0.01085,((V206RF-JABR01098600.1-trav:0.0,V229RF-AQIB01128644.1-trav:0.0):0.00055,V146RF-AQIA01064146.1-trav:0.01099)0.905:0.02228)0.887:0.04343)0.999:0.28251,(V63RF-JYKQ01054940.1-trav:0.01706,((V84RF-AACZ03097614.1-trav:0.0,V69RF-AJFE01069975.1-trav:0.0):0.04664,(V151RF-ABGA01083934.1-trav:0.02170,(V74RF-ADFV01192038.1-trav:0.01394,(V8RF-CABD02105586.1-trav:0.05512,(V157RF-ABGA01083939.1-trav:0.06998,V70RF-ADFV01192037.1-trav:0.00054)0.225:0.01068)0.848:0.03051)0.872:0.02082)0.729:0.00948)0.786:0.02921)0.848:0.09756)0.965:0.17372)0.856:0.16267,(((V146RF-ABDC01454736.1-trav:0.08125,((V77RF-ADFV01192039.1-trav:0.02275,(((V67RF-AHZZ01107545.1-trav:0.0,V70RF-JYKQ01054942.1-trav:0.0):0.00055,(V149RF-AQIA01064146.1-trav:0.00468,V232RF-AQIB01128644.1-trav:0.00921)0.907:0.00904)0.989:0.05995,(V135RF-ABGA01387833.1-trav:0.02332,(V13RF-CABD02105590.1-trav:0.00055,(V87RF-AACZ03097618.1-trav:0.0,V72RF-AJFE01069976.1-trav:0.0):0.01114)0.324:0.02296)0.734:0.02300)0.410:0.00055)0.991:0.08833,V62RF-JZKE01143903.1-trav:0.02023)0.811:0.03195)0.856:0.06229,(V78RF-JZKE01143916.1-trav:0.11292,(((V216RF-JABR01098604.1-trav:0.04411,(V139RF-AQIA01064138.1-trav:0.02221,(V60RF-JYKQ01054940.1-trav:0.0,V225RF-AQIB01128644.1-trav:0.0):0.02182)0.826:0.00053)0.800:0.03354,(V154RF-ABGA01083939.1-trav:0.00055,(V78RF-AACZ03097613.1-trav:0.00055,V63RF-AJFE01069975.1-trav:0.01087)0.921:0.02210)0.000:0.00054)0.859:0.01062,(V5RF-CABD02105579.1-trav:0.00055,V67RF-ADFV01192035.1-trav:0.01101)1.000:0.00055)0.974:0.11866)0.902:0.09038)0.968:0.25665,(V50RF-JZKE01143890.1-trav:0.14963,(V95RF-AGCE01026527.1-trav:0.04685,(V115RF-ABDC01533415.1-trav:0.18737,(V81RF-ADFV01192039.1-trav:0.03186,(V130RF-ABGA01386446.1-trav:0.02268,(V219RF-AQIB01128643.1-trav:0.04411,V200RF-JABR01098598.1-trav:0.01673)0.796:0.01861)0.762:0.01512)0.785:0.01064)0.690:0.01077)0.966:0.20099)0.948:0.20602)0.933:0.29257)0.995:0.71399,((V120RF-CABD02105639.1-trdv:0.00054,(V201RF-AACZ03095321.1-trdv:0.0,V29RF-AJFE01024273.1-trdv:0.0):0.02152)1.000:1.22391,((V37RF-JZKE01143868.1-trav:0.06816,(((V98RF-ADFV01192049.1-trav:0.04014,(V239RF-ABGA01321072.1-trdv:0.01979,V28RF-CABD02105626.1-trdv:0.00996)0.762:0.00977)0.768:0.00996,(V169RF-AQIA01064166.1-trdv:0.01982,(V125RF-JYKQ01135388.1-trav:0.00968,((V4RF-AHZZ01035404.1-trav:0.00931,(V185RF-JABR01098590.1-trav:0.01989,(V99RF-ADFV01192049.1-trav:0.02005,(V67RF-AACZ03095317.1-trav:0.00970,((V238RF-ABGA01321070.1-trav:0.0,V29RF-CABD02105626.1-trav:0.0):0.00055,V122RF-AJFE01024276.1-trav:0.00055)0.000:0.00055)0.830:0.00974)0.891:0.00053)0.862:0.01980)0.844:0.00994,V210RF-AQIB01128637.1-trav:0.04106)0.997:0.00053)0.910:0.02074)0.000:0.00054)0.914:0.02046,V186RF-JABR01098592.1-trdv:0.00998)0.582:0.00279)0.968:0.18032,((((V48RF-JZKE01143874.1-trdv:0.10507,(V46RF-JZKE01143873.1-trdv:0.12391,V106RF-ABDC01497734.1-trdv:0.31859)0.522:0.00060)0.999:0.17559,(V20RF-CABD02105611.1-trdv:0.03800,V96RF-AACZ03097622.1-trdv:0.03810)0.871:0.03861)0.885:0.05906,V171RF-JYKQ01026663.1-trav:0.03644)1.000:0.32313,((V53RF-ABDC01379531.1-trav:0.01372,((V59RF-JZKE01143896.1-trav:0.04687,(V67RF-JZKE01143910.1-trav:0.05595,(V231RF-AQIB01128644.1-trav:0.01112,((V76RF-ADFV01192039.1-trav:0.03208,(V134RF-ABGA01387831.1-trav:0.03101,(V86RF-AACZ03097618.1-trav:0.01006,(V12RF-CABD02105589.1-trav:0.02083,(V216RF-AACZ03171512.1-trav:0.0,V71RF-AJFE01069976.1-trav:0.0):0.02120)1.000:0.00053)0.620:0.02075)0.735:0.01203)0.957:0.04891,(V69RF-JYKQ01054942.1-trav:0.00055,(V66RF-AHZZ01107545.1-trav:0.01015,V148RF-AQIA01064146.1-trav:0.00055)0.935:0.02049)0.916:0.02111)0.992:0.00054)1.000:0.13926)0.419:0.02659)0.759:0.01492,V55RF-JZKE01143895.1-trav:0.03018)0.903:0.03648)0.906:0.07709,(V52RF-JZKE01143891.1-trav:0.08647,(V131RF-ABGA01386446.1-trdv:0.05853,((V220RF-AQIB01128643.1-trav:0.00054,(V155RF-AQIA01064149.1-trav:0.02780,V39RF-AHZZ01098200.1-trav:0.03909)0.724:0.02246)0.575:0.02879,(V96RF-AGCE01026527.1-trdv:0.10839,(V16RF-CABD02105598.1-trdv:0.02976,(V92RF-AACZ03097619.1-trdv:0.0,V77RF-AJFE01069976.1-trdv:0.0):0.00995)0.860:0.02488)0.798:0.01611)0.953:0.00058)0.979:0.11146)0.993:0.18435)0.712:0.06306)0.804:0.05369)0.877:0.24804)0.190:0.16856)0.082:0.06362)0.606:0.07462)0.954:0.33549,((((V132RF-AQIA01048536.1-trbv:0.0,V204RF-AQIB01162321.1-trbv:0.0):0.00053,(((V119RF-CABD02377030.1-trbv:0.03019,(V60RF-AACZ03067007.1-trbv:0.0,V85RF-AJFE01104369.1-trbv:0.0):0.02005)0.885:0.03479,V51RF-ABGA01091263.1-trbv:0.03293)0.208:0.02305,V123RF-JYKQ01131111.1-trbv:0.02991)0.391:0.00055)0.754:0.02435,V83RF-JABR01196792.1-trbv:0.00473)1.000:1.41481,((((V39RF-JYKQ01029811.1-trbv:0.01257,((V18RF-AACZ03053981.1-trbv:0.01103,(V213RF-ABGA01277802.1-trbv:0.01083,V84RF-CABD02352499.1-trbv:0.02218)0.733:0.01095)0.967:0.04493,(V172RF-AHZZ01067653.1-trbv:0.00055,V94RF-AQIA01048528.1-trbv:0.03426)0.781:0.01116)0.734:0.00931)0.993:0.21250,((V121RF-JZKE01294669.1-trbv:0.13529,(V18RF-AGCE01062008.1-trbv:0.04761,(V100RF-CABD02352512.1-trbv:0.00055,(V38RF-AACZ03053988.1-trbv:0.0,V168RF-AJFE01070463.1-trbv:0.0):0.02177)0.984:0.09979)0.360:0.06548)0.981:0.21896,((V6RF-AACZ03053974.1-trbv:0.0,V39RF-AJFE01039607.1-trbv:0.0):0.18725,(V165RF-JABR01088215.1-trbv:0.13921,((((V25RF-ADFV01062076.1-trbv:0.04453,((V91RF-CABD02352508.1-trbv:0.03339,(V108RF-ABGA01301086.1-trbv:0.00055,V157RF-AJFE01070463.1-trbv:0.01086)0.888:0.00054)0.922:0.02176,((V163RF-AJFE01070463.1-trbv:0.00054,V33RF-AACZ03053988.1-trbv:0.01088)0.850:0.01083,V28RF-AACZ03053984.1-trbv:0.01084)0.000:0.00055)0.955:0.00057)0.220:0.01102,((V157RF-AHZZ01067651.1-trbv:0.00055,V111RF-AQIA01048532.1-trbv:0.01091)0.763:0.01117,(V100RF-JYKQ01131094.1-trbv:0.02235,(V102RF-JYKQ01131095.1-trbv:0.01102,V184RF-AQIB01162320.1-trbv:0.01108)0.765:0.01119)0.887:0.02238)0.875:0.02252)0.711:0.00852,((V94RF-CABD02352509.1-trbv:0.01326,V160RF-AJFE01070463.1-trbv:0.05308)0.849:0.03900,(V154RF-JABR01088213.1-trbv:0.08490,(V19RF-ADFV01062075.1-trbv:0.04908,(V25RF-AACZ03053983.1-trbv:0.03192,(V90RF-CABD02352503.1-trbv:0.01059,V154RF-AJFE01070463.1-trbv:0.00054)0.971:0.00055)0.336:0.02812)0.763:0.05962)0.300:0.04073)0.852:0.03936)0.844:0.02772,(((V18RF-ADFV01062075.1-trbv:0.07584,(V36RF-AACZ03053988.1-trbv:0.0,V166RF-AJFE01070463.1-trbv:0.0):0.07361)0.893:0.05177,V174RF-AQIB01162317.1-trbv:0.06584)0.947:0.07387,V106RF-AQIA01048530.1-trbv:0.05902)0.836:0.02556)0.914:0.08983)0.609:0.09210)0.923:0.14638)0.772:0.03416)0.980:0.32708,((V107RF-CABD02352525.1-trbv:0.39850,((V147RF-AHZZ01067649.1-trbv:0.03976,(V28RF-ADFV01062079.1-trbv:0.02331,(V45RF-AACZ03053991.1-trbv:0.0,V143RF-AJFE01070461.1-trbv:0.0):0.04989)0.686:0.01805)1.000:0.26677,((V152RF-ABDC01473376.1-trbv:0.27599,(((V50RF-AACZ03053992.1-trbv:0.00055,V140RF-AJFE01070460.1-trbv:0.01034)0.913:0.01042,(V111RF-CABD02352526.1-trbv:0.01039,V48RF-ABGA01091257.1-trbv:0.03135)0.000:0.00053)0.869:0.03271,(V69RF-JABR01092448.1-trbv:0.01025,(V118RF-JYKQ01131105.1-trbv:0.03982,V199RF-AQIB01162321.1-trbv:0.00054)0.902:0.02113)0.889:0.03369)0.967:0.14357)0.973:0.19196,(V159RF-ABDC01560090.1-trbv:0.12594,(V116RF-CABD02377004.1-trbv:0.05631,V198RF-AQIB01162321.1-trbv:0.04396)0.953:0.10292)0.976:0.17404)0.733:0.08715)0.944:0.19465)0.939:0.17000,(((V20RF-AGCE01062009.1-trbv:0.10243,(V110RF-JYKQ01131102.1-trbv:0.01035,(V38RF-ABGA01091248.1-trbv:0.04208,((V41RF-AACZ03053989.1-trbv:0.0,V145RF-AJFE01070462.1-trbv:0.0):0.00054,(V103RF-CABD02352514.1-trbv:0.00055,V104RF-CABD02352515.1-trbv:0.01055)0.905:0.01054)0.822:0.04463)0.844:0.07014)0.558:0.06035)0.986:0.18307,(((V20RF-AACZ03053981.1-trbv:0.01049,V149RF-AJFE01070463.1-trbv:0.00055)0.897:0.05605,(V22RF-AACZ03053983.1-trbv:0.07539,(V102RF-CABD02352514.1-trbv:0.0,V23RF-ADFV01062075.1-trbv:0.0):0.13368)0.710:0.03457)0.999:0.29182,(((V82RF-CABD02352499.1-trbv:0.00055,(V16RF-AACZ03053981.1-trbv:0.00054,V146RF-AJFE01070463.1-trbv:0.01153)0.891:0.02276)0.943:0.05052,(((V181RF-AHZZ01067655.1-trbv:0.0,V91RF-AQIA01048527.1-trbv:0.0,V36RF-JYKQ01029809.1-trbv:0.0):0.06866,(V216RF-ABGA01277808.1-trbv:0.06750,(V80RF-CABD02352494.1-trbv:0.07985,V14RF-AACZ03053979.1-trbv:0.00055)0.098:0.01151)0.921:0.04052)0.916:0.05524,(V92RF-AQIA01048527.1-trbv:0.01137,((V165RF-AQIB01162313.1-trbv:0.03425,V37RF-JYKQ01029811.1-trbv:0.02291)0.777:0.01136,(V170RF-AHZZ01067653.1-trbv:0.04450,V221RF-JABR01184607.1-trbv:0.08575)0.668:0.00173)0.748:0.01113)0.993:0.10633)0.446:0.01298)0.968:0.11170,(((V106RF-JYKQ01131101.1-trbv:0.02075,(V138RF-AHZZ01067649.1-trbv:0.01065,V114RF-AQIA01048532.1-trbv:0.00055)0.665:0.00054)0.966:0.07670,(V208RF-ABGA01259417.1-trbv:0.01077,(((V98RF-CABD02352511.1-trbv:0.0,V99RF-CABD02352512.1-trbv:0.0):0.00977,(V37RF-AACZ03053988.1-trbv:0.01049,V167RF-AJFE01070463.1-trbv:0.00055)0.945:0.03271)0.884:0.02260,V20RF-ADFV01062075.1-trbv:0.07747)0.859:0.02163)0.931:0.05851)0.987:0.14449,(((((((((V162RF-AJFE01070463.1-trbv:0.01106,(V96RF-CABD02352511.1-trbv:0.00055,V32RF-AACZ03053988.1-trbv:0.01087)0.000:0.00054)0.492:0.02257,(V29RF-AACZ03053986.1-trbv:0.01125,V159RF-AJFE01070463.1-trbv:0.01110)0.750:0.01070)0.924:0.03621,(((V113RF-AQIA01048532.1-trbv:0.00055,V186RF-AQIB01162320.1-trbv:0.03462)0.649:0.00438,(V159RF-AHZZ01067651.1-trbv:0.00055,V104RF-JYKQ01131098.1-trbv:0.02266)0.849:0.01883)0.911:0.03461,V0RF-JABR01013263.1-trbv:0.06918)0.764:0.01071)0.953:0.04780,V105RF-AQIA01048530.1-trbv:0.02304)0.767:0.01136,V152RF-AHZZ01067651.1-trbv:0.01128)0.875:0.02754,(V168RF-AHZZ01067652.1-trbv:0.02273,V104RF-AQIA01048530.1-trbv:0.03661)0.880:0.03077)0.901:0.03631,(V104RF-ABGA01301078.1-trbv:0.05882,((V89RF-JYKQ01131090.1-trbv:0.01941,(V100RF-AQIA01048530.1-trbv:0.03086,V162RF-AHZZ01067652.1-trbv:0.01469)0.154:0.01136)0.860:0.02639,((V108RF-AQIA01048531.1-trbv:0.02287,V99RF-JYKQ01131094.1-trbv:0.01143)0.910:0.03552,V160RF-JABR01088214.1-trbv:0.05863)0.841:0.02283)0.747:0.01205)0.779:0.01930)0.529:0.02332,((V165RF-AHZZ01067652.1-trbv:0.00055,(V92RF-JYKQ01131090.1-trbv:0.01111,V175RF-AQIB01162317.1-trbv:0.03397)0.926:0.03413)0.918:0.04238,(V110RF-ABGA01301086.1-trbv:0.07008,(V35RF-AACZ03053988.1-trbv:0.00055,V165RF-AJFE01070463.1-trbv:0.01105)0.724:0.01018)0.946:0.04539)0.752:0.01320)0.884:0.02410,(V17RF-ADFV01062075.1-trbv:0.07033,(V68RF-ABGA01129113.1-trbv:0.05823,(V89RF-CABD02352502.1-trbv:0.0,V24RF-AACZ03053983.1-trbv:0.0,V153RF-AJFE01070463.1-trbv:0.0):0.04658)0.981:0.09086)0.756:0.01465)0.691:0.01302)0.902:0.08774)0.928:0.11328)0.913:0.12579)0.497:0.04290,((V22RF-AGCE01062009.1-trbv:0.04752,(V142RF-AJFE01070461.1-trbv:0.00053,(V105RF-CABD02352520.1-trbv:0.00055,V43RF-AACZ03053991.1-trbv:0.02061)0.836:0.02056)0.975:0.14378)0.998:0.33317,(V129RF-ABDC01281097.1-trbv:0.08717,(V4RF-AACZ03053974.1-trbv:0.00055,V37RF-AJFE01039607.1-trbv:0.02102)0.987:0.20399)1.000:0.33311)0.821:0.07538)0.909:0.11689)0.932:0.16836)0.954:0.23773,(((V125RF-AQIA01048536.1-trbv:0.00054,((V116RF-JYKQ01131104.1-trbv:0.02086,V197RF-AQIB01162321.1-trbv:0.02128)0.770:0.01046,(V148RF-AHZZ01067649.1-trbv:0.02092,(V45RF-ABGA01091252.1-trbv:0.01112,((V108RF-CABD02352526.1-trbv:0.0,V137RF-AJFE01070460.1-trbv:0.0):0.00055,V47RF-AACZ03053991.1-trbv:0.01058)0.800:0.01050)0.944:0.03202)0.000:0.00053)0.910:0.02091)0.990:0.42569,((((V114RF-CABD02352531.1-trbv:0.00964,((V173RF-ABGA01225869.1-trbv:0.02251,V54RF-AACZ03053994.1-trbv:0.03128)0.428:0.00054,V202RF-AQIB01162321.1-trbv:0.05572)0.771:0.01065)0.731:0.01150,V32RF-ADFV01062084.1-trbv:0.00055)0.998:0.31367,(V0RF-JZKE01005121.1-trbv:0.21137,(((V73RF-JABR01092448.1-trbv:0.02018,(V135RF-AHZZ01067647.1-trbv:0.00053,(V203RF-AQIB01162321.1-trbv:0.02044,(V122RF-JYKQ01131110.1-trbv:0.01016,V131RF-AQIA01048536.1-trbv:0.00055)0.000:0.00055)0.836:0.01016)0.763:0.01021)0.955:0.04480,(V55RF-AACZ03053994.1-trbv:0.00055,(V115RF-CABD02352532.1-trbv:0.01063,V134RF-AJFE01070459.1-trbv:0.01049)0.770:0.01082)0.771:0.01184)0.860:0.02152,V33RF-ADFV01062084.1-trbv:0.00053)0.949:0.12951)0.986:0.20074)0.751:0.04128,(((V49RF-ABGA01091257.1-trbv:0.03381,(V112RF-CABD02352529.1-trbv:0.00055,(V51RF-AACZ03053992.1-trbv:0.0,V130RF-AJFE01070459.1-trbv:0.0):0.01093)0.999:0.00055)0.438:0.00159,(V200RF-AQIB01162321.1-trbv:0.02220,(V70RF-JABR01092448.1-trbv:0.02187,(V151RF-AHZZ01067649.1-trbv:0.04329,(V128RF-AQIA01048536.1-trbv:0.01055,V119RF-JYKQ01131107.1-trbv:0.00055)1.000:0.00054)0.748:0.01036)0.765:0.01076)0.801:0.03169)0.992:0.31339,((V31RF-ADFV01062082.1-trbv:0.00055,((V50RF-ABGA01091260.1-trbv:0.00055,((V201RF-AQIB01162321.1-trbv:0.01072,(V71RF-JABR01092448.1-trbv:0.00055,(V137RF-AHZZ01067648.1-trbv:0.01067,V129RF-AQIA01048536.1-trbv:0.03266)0.000:0.00055)0.000:0.00054)0.875:0.03188,(V118RF-CABD02377005.1-trbv:0.02244,(V59RF-AACZ03067000.1-trbv:0.0,V84RF-AJFE01104359.1-trbv:0.0):0.01102)1.000:0.18561)0.904:0.03328)0.899:0.02161,(V52RF-AACZ03053992.1-trbv:0.01085,V131RF-AJFE01070459.1-trbv:0.00055)0.000:0.00054)0.835:0.01080)1.000:0.37079,(((V80RF-JZKE01196378.1-trbv:0.08309,V114RF-JZKE01294668.1-trbv:0.11405)0.856:0.03646,(V147RF-ABDC01455982.1-trbv:0.24689,((V9RF-AGCE01061998.1-trbv:0.08504,V11RF-AGCE01062000.1-trbv:0.11292)0.965:0.07940,(V19RF-AGCE01062009.1-trbv:0.11564,(((V156RF-JABR01088213.1-trbv:0.02229,V189RF-AQIB01162320.1-trbv:0.01154)0.558:0.01140,(V108RF-JYKQ01131101.1-trbv:0.01095,(V140RF-AHZZ01067649.1-trbv:0.01096,V116RF-AQIA01048532.1-trbv:0.01116)0.884:0.01088)0.992:0.00054)0.916:0.04939,(V22RF-ADFV01062075.1-trbv:0.03725,(V101RF-CABD02352513.1-trbv:0.01123,V39RF-AACZ03053988.1-trbv:0.02248)0.800:0.02310)0.407:0.01385)0.849:0.03678)0.886:0.06937)0.752:0.02677)0.314:0.03529)0.950:0.12148,(((V13RF-AGCE01062002.1-trbv:0.16754,(((V26RF-AACZ03053983.1-trbv:0.01137,V155RF-AJFE01070463.1-trbv:0.00055)0.753:0.01057,V107RF-ABGA01301083.1-trbv:0.08588)0.987:0.06590,((V171RF-JABR01088215.1-trbv:0.03452,((V23RF-AACZ03053983.1-trbv:0.01196,V152RF-AJFE01070463.1-trbv:0.02299)0.911:0.02322,V88RF-CABD02352501.1-trbv:0.01111)1.000:0.00054)0.958:0.00054,((V109RF-ABGA01301086.1-trbv:0.05721,(V34RF-AACZ03053988.1-trbv:0.0,V164RF-AJFE01070463.1-trbv:0.0):0.07061)0.734:0.01096,(((V164RF-JABR01088214.1-trbv:0.04559,((V158RF-AHZZ01067651.1-trbv:0.02351,V185RF-AQIB01162320.1-trbv:0.03497)0.203:0.01157,(V112RF-AQIA01048532.1-trbv:0.04735,V103RF-JYKQ01131096.1-trbv:0.00055)0.912:0.00055)0.824:0.02331)0.966:0.05940,(V176RF-AQIB01162318.1-trbv:0.00055,(V95RF-JYKQ01131092.1-trbv:0.06103,(V167RF-AHZZ01067652.1-trbv:0.03773,V103RF-AQIA01048530.1-trbv:0.02348)0.755:0.01431)0.881:0.03706)0.930:0.04330)0.912:0.03103,((V95RF-CABD02352510.1-trbv:0.11024,V172RF-ABGA01223433.1-trbv:0.00053)0.932:0.03422,((V154RF-AHZZ01067651.1-trbv:0.0,V98RF-JYKQ01131093.1-trbv:0.0):0.05996,(V107RF-AQIA01048530.1-trbv:0.05979,V101RF-JYKQ01131094.1-trbv:0.06345)0.763:0.01179)0.884:0.03187)0.710:0.00054)0.279:0.01037)0.776:0.01062)0.000:0.00055)0.263:0.01996)0.486:0.02362,(((V182RF-JABR01088216.1-trbv:0.08117,(((((V180RF-AHZZ01067655.1-trbv:0.0,V35RF-JYKQ01029809.1-trbv:0.0):0.00873,(V163RF-AQIB01162312.1-trbv:0.07597,(V179RF-AHZZ01067655.1-trbv:0.02227,V90RF-AQIA01048526.1-trbv:0.00055)0.688:0.00504)0.953:0.07004)0.975:0.08351,(V79RF-CABD02352493.1-trbv:0.04612,(V10RF-AACZ03053976.1-trbv:0.01120,V173RF-AJFE01070465.1-trbv:0.00055)0.885:0.02255)0.836:0.02185)0.742:0.01468,((((V10RF-ADFV01062071.1-trbv:0.06537,(V178RF-JABR01088216.1-trbv:0.01511,(V160RF-AQIB01162312.1-trbv:0.02111,(V87RF-AQIA01048526.1-trbv:0.01053,(V185RF-AHZZ01067656.1-trbv:0.01057,V32RF-JYKQ01029809.1-trbv:0.01056)0.809:0.01048)0.783:0.01074)0.896:0.05003)0.990:0.09474)0.414:0.01909,(V8RF-ADFV01062069.1-trbv:0.00055,(V75RF-CABD02352482.1-trbv:0.04438,(V7RF-AACZ03053974.1-trbv:0.0,V40RF-AJFE01039608.1-trbv:0.0):0.00054)0.960:0.04415)0.569:0.02166)0.858:0.00054,V220RF-ABGA01277810.1-trbv:0.08295)0.818:0.01124,((V222RF-ABGA01277815.1-trbv:0.06582,(V218RF-ABGA01277809.1-trbv:0.03336,(V76RF-CABD02352488.1-trbv:0.01146,(V13RF-AACZ03053977.1-trbv:0.0,V171RF-AJFE01070464.1-trbv:0.0):0.02356)0.857:0.02743)0.951:0.05153)0.835:0.02612,V219RF-ABGA01277810.1-trbv:0.05811)0.693:0.01058)0.000:0.00054)0.831:0.01162,V13RF-ADFV01062071.1-trbv:0.03385)0.000:0.00053)0.979:0.05884,(V0RF-AGCE01061995.1-trbv:0.04083,V4RF-AGCE01061995.1-trbv:0.05272)0.943:0.04215)0.798:0.00054,((V88RF-JYKQ01131090.1-trbv:0.01150,(V172RF-AQIB01162317.1-trbv:0.04862,V161RF-AHZZ01067652.1-trbv:0.00055)0.000:0.00054)0.877:0.02401,V99RF-AQIA01048530.1-trbv:0.01121)0.888:0.02306)0.748:0.00054)0.886:0.06751,(V138RF-ABDC01368601.1-trbv:0.22648,(V15RF-AACZ03053981.1-trbv:0.0,V172RF-AJFE01070464.1-trbv:0.0):0.29456)0.429:0.03794)0.979:0.18721)0.924:0.15906)0.330:0.08218)0.677:0.11020)0.865:0.12130)0.997:0.40709,((V42RF-ABGA01091249.1-trbv:0.02443,V44RF-AACZ03053991.1-trbv:0.02004)0.999:0.65146,(((V124RF-JZKE01294690.1-trbv:0.13949,(V125RF-JZKE01294692.1-trbv:0.10744,(((V73RF-CABD02352480.1-trbv:0.01953,V38RF-AJFE01039607.1-trbv:0.00055)0.920:0.04563,(V80RF-AQIA01048525.1-trbv:0.12177,(V85RF-AQIA01048525.1-trbv:0.02234,(V184RF-AHZZ01067656.1-trbv:0.01082,V158RF-AQIB01162312.1-trbv:0.00055)0.766:0.01084)0.788:0.01543)0.421:0.02550)0.916:0.07878,(V162RF-AQIB01162312.1-trbv:0.03504,((V9RF-AACZ03053975.1-trbv:0.0,V41RF-AJFE01039609.1-trbv:0.0):0.01138,(V78RF-CABD02352492.1-trbv:0.00055,(V12RF-AACZ03053977.1-trbv:0.0,V170RF-AJFE01070464.1-trbv:0.0):0.01077)0.923:0.03856)0.922:0.06135)0.299:0.05669)0.824:0.08410)1.000:0.39383)0.708:0.05291,(V5RF-ADFV01062069.1-trbv:0.07775,(((V183RF-AHZZ01067656.1-trbv:0.02145,V84RF-AQIA01048525.1-trbv:0.01123)0.626:0.02166,(V177RF-AHZZ01067655.1-trbv:0.00054,V161RF-AQIB01162312.1-trbv:0.03820)0.981:0.05882)0.421:0.00999,(V1RF-AGCE01061995.1-trbv:0.01903,((V11RF-ADFV01062071.1-trbv:0.04142,(V77RF-CABD02352491.1-trbv:0.0,V11RF-AACZ03053977.1-trbv:0.0,V169RF-AJFE01070464.1-trbv:0.0):0.03256)0.826:0.01841,V217RF-ABGA01277809.1-trbv:0.02254)0.920:0.03015)0.609:0.00053)0.776:0.01459)0.430:0.02400)0.000:0.02905,V154RF-AQIB01162311.1-trbv:0.03207)0.998:0.61100)0.738:0.09852)0.691:0.15624)0.000:0.05768)0.867:0.34262)0.912:0.27739)0.645:0.10532)0.990:0.90489)0.244:0.10418)0.925:0.16053,((V3RF-ABGA01025791.1-ighv:0.01200,((((V17RF-AHZZ01069449.1-ighv:0.0,V15RF-JYKQ01005774.1-ighv:0.0):0.01056,V256RF-AQIA01066362.1-ighv:0.00054)0.875:0.02141,(((V91RF-JABR01035059.1-ighv:0.04606,(V132RF-AGCE01148199.1-ighv:0.06848,(V59RF-ABGA01099945.1-ighv:0.05968,(V192RF-AHZZ01084890.1-ighv:0.03168,V145RF-AQIB01153558.1-ighv:0.00053)0.795:0.02886)0.741:0.01542)0.203:0.01196)0.741:0.01209,(V128RF-ADFV01131961.1-ighv:0.01071,V157RF-ADFV01143437.1-ighv:0.04366)0.786:0.01081)0.801:0.01333,(V136RF-JYKQ01245881.1-ighv:0.04136,V149RF-AQIB01153566.1-ighv:0.01282)0.331:0.01096)0.864:0.00055)0.759:0.00742,V257RF-AQIA01066366.1-ighv:0.01162)0.895:0.03213)0.454:0.01197,((((((V101RF-JABR01049702.1-ighv:0.05239,(V140RF-JYKQ01245888.1-ighv:0.02083,V122RF-AQIB01153511.1-ighv:0.01026)0.859:0.02072)0.940:0.04140,(V270RF-AHZZ01125719.1-ighv:0.04157,V183RF-AQIA01075826.1-ighv:0.01150)0.181:0.01019)0.767:0.01147,(((V11RF-JABR01059011.1-ighv:0.03133,(V80RF-ABGA01194059.1-ighv:0.01007,(V59RF-AHZZ01104761.1-ighv:0.03144,V93RF-JABR01035060.1-ighv:0.00055)0.921:0.04263)0.997:0.08857)0.504:0.00054,(V9RF-ABGA01025808.1-ighv:0.05311,(V153RF-CABD02117492.1-ighv:0.03142,V104RF-AACZ03097900.1-ighv:0.03110)0.919:0.03089)0.746:0.00053)0.805:0.02071,(((V122RF-ADFV01131954.1-ighv:0.01036,((V113RF-AACZ03097906.1-ighv:0.0,V52RF-AJFE01045051.1-ighv:0.0):0.03189,(V25RF-ABGA01044313.1-ighv:0.02113,V145RF-CABD02117473.1-ighv:0.03260)0.847:0.00054)0.898:0.02132)0.789:0.01122,(((((V20RF-JYKQ01005787.1-ighv:0.06845,(V262RF-AQIA01066385.1-ighv:0.00054,V101RF-AQIB01153486.1-ighv:0.04447)0.317:0.02256)0.732:0.01112,V274RF-AQIA01066397.1-ighv:0.01099)0.879:0.02245,V272RF-AQIA01066395.1-ighv:0.01028)0.777:0.01298,(V177RF-JYKQ01042861.1-ighv:0.03262,(V43RF-JYKQ01041713.1-ighv:0.02116,V95RF-AQIB01153482.1-ighv:0.01056)0.770:0.01236)0.365:0.01097)0.861:0.02741,(V63RF-ABGA01099948.1-ighv:0.03349,(V58RF-ABGA01099941.1-ighv:0.02163,(V169RF-AACZ03171037.1-ighv:0.02742,V129RF-CABD02117421.1-ighv:0.02113)0.774:0.01668)0.861:0.02279)0.766:0.01551)0.752:0.00913)0.880:0.02142,(V33RF-ABGA01058273.1-ighv:0.01041,V78RF-ABGA01174999.1-ighv:0.00054)0.940:0.03163)0.787:0.01038)0.237:0.00055)0.000:0.00053,V115RF-ADFV01131944.1-ighv:0.04332)0.784:0.01044,(V49RF-ABDC01375549.1-ighv:0.05623,(V18RF-ABDC01314388.1-ighv:0.15996,(V72RF-ABDC01407894.1-ighv:0.01064,(V7RF-ABDC01231274.1-ighv:0.03247,V74RF-ABDC01417489.1-ighv:0.02074)0.890:0.00054)0.775:0.01226)0.656:0.02125)0.842:0.01987)0.889:0.02165,((((V115RF-AQIB01153507.1-ighv:0.06133,(V94RF-AQIB01153481.1-ighv:0.03717,((V88RF-JABR01004698.1-ighv:0.00055,(V59RF-JABR01091180.1-ighv:0.01991,((V6RF-ABGA01025808.1-ighv:0.02406,(V102RF-AACZ03097899.1-ighv:0.02050,V4RF-AJFE01011110.1-ighv:0.01008)0.863:0.01945)0.899:0.02692,V182RF-AQIA01075825.1-ighv:0.01981)0.771:0.00054)0.787:0.00980)0.849:0.01998,V41RF-JYKQ01041713.1-ighv:0.02725)0.811:0.03956)0.723:0.01025)0.966:0.06010,V174RF-AQIA01075814.1-ighv:0.01515)0.859:0.02076,(V197RF-AHZZ01084893.1-ighv:0.02072,((V7RF-ABGA01025808.1-ighv:0.02074,((V154RF-CABD02117494.1-ighv:0.01043,V103RF-AACZ03097900.1-ighv:0.02071)0.933:0.03115,V140RF-AQIB01153555.1-ighv:0.01033)0.769:0.01030)0.768:0.01030,V206RF-AQIA01075865.1-ighv:0.03112)0.000:0.00054)0.794:0.01048)0.855:0.01039,(V175RF-AJFE01119883.1-ighv:0.06292,(V60RF-JABR01091180.1-ighv:0.02975,(V18RF-AHZZ01069451.1-ighv:0.01267,V251RF-AQIA01066360.1-ighv:0.01036)0.925:0.04588)0.347:0.01770)0.685:0.00055)0.962:0.04335)0.901:0.04144)0.964:0.09242)0.792:0.02295)0.000:0.00055)0.787:0.03747)0.904:0.05416)0.000:0.00055,((((V93RF-JZKE01278267.1-ighv:0.05939,V98RF-JZKE01278276.1-ighv:0.05661)0.846:0.03746,(V141RF-ABDC01396906.1-ighv:0.04913,((V171RF-AACZ03171037.1-ighv:0.01172,V48RF-AJFE01045048.1-ighv:0.00055)0.694:0.00593,((V117RF-AACZ03097910.1-ighv:0.00054,V128RF-AQIB01153537.1-ighv:0.07309)0.361:0.01131,(V29RF-ABGA01044319.1-ighv:0.03523,(V123RF-CABD02117395.1-ighv:0.02187,(V145RF-JYKQ01245904.1-ighv:0.07205,(V235RF-AHZZ01103094.1-ighv:0.03401,V134RF-AQIB01153543.1-ighv:0.00055)0.331:0.01096)0.872:0.02237)0.858:0.02256)0.876:0.02261)0.874:0.03141)0.943:0.05334)0.847:0.03331)0.885:0.04672,(((V10RF-ABDC01282057.1-ighv:0.02878,V47RF-ABDC01373301.1-ighv:0.03436)0.895:0.03170,(V9RF-ABDC01282056.1-ighv:0.14928,(V50RF-ABDC01377237.1-ighv:0.04299,(V4RF-ABDC01231268.1-ighv:0.00055,V154RF-ABDC01493416.1-ighv:0.01163)0.941:0.04967)0.817:0.02713)0.510:0.00055)0.888:0.02365,(V64RF-AGCE01147864.1-ighv:0.02473,(V70RF-AGCE01147874.1-ighv:0.04888,(V12RF-AHZZ01064615.1-ighv:0.09068,(V203RF-JYKQ01056010.1-ighv:0.00055,V17RF-JABR01066987.1-ighv:0.03541)0.835:0.00054)0.951:0.04896)0.765:0.02570)0.812:0.02142)0.778:0.01206)0.752:0.01114,(((((V131RF-AGCE01148188.1-ighv:0.06892,((V60RF-AHZZ01104763.1-ighv:0.02368,(V266RF-AQIA01066387.1-ighv:0.00055,((V136RF-AQIB01153553.1-ighv:0.05375,V200RF-AQIA01075862.1-ighv:0.01765)0.161:0.01417,(V28RF-AHZZ01091599.1-ighv:0.03395,V263RF-JYKQ01237599.1-ighv:0.04829)0.527:0.02718)0.542:0.02613)0.513:0.02387)0.755:0.02404,V180RF-AQIA01075823.1-ighv:0.04256)0.901:0.05479)0.846:0.03231,V126RF-CABD02117416.1-ighv:0.05761)0.877:0.04444,((((V117RF-AQIB01153509.1-ighv:0.03365,V57RF-ABGA01099941.1-ighv:0.09300)0.150:0.00054,(V135RF-JYKQ01245880.1-ighv:0.01097,((V276RF-AQIA01073275.1-ighv:0.00054,(V123RF-AQIB01153511.1-ighv:0.02149,(V230RF-AHZZ01096574.1-ighv:0.01067,V139RF-JYKQ01245886.1-ighv:0.01075)0.000:0.00054)0.189:0.01067)0.992:0.06766,V245RF-AQIB01158235.1-ighv:0.02222)0.751:0.01012)0.781:0.01041)0.836:0.00054,(V143RF-AQIB01153557.1-ighv:0.01239,(V209RF-AQIA01075868.1-ighv:0.01146,V7RF-JYKQ01005770.1-ighv:0.03462)0.924:0.03436)0.963:0.05938)0.645:0.01342,(V118RF-ADFV01131950.1-ighv:0.06045,V8RF-ABGA01025808.1-ighv:0.06544)0.616:0.00164)0.857:0.03969)0.857:0.02646,(((V181RF-AQIA01075825.1-ighv:0.03241,((V48RF-ABDC01375549.1-ighv:0.0,V95RF-ABDC01454767.1-ighv:0.0):0.08538,V134RF-JYKQ01245876.1-ighv:0.01052)0.941:0.03306)0.703:0.00156,V114RF-AQIB01153507.1-ighv:0.04654)0.752:0.01117,(V155RF-CABD02117499.1-ighv:0.00054,((V101RF-AACZ03097899.1-ighv:0.0,V3RF-AJFE01011110.1-ighv:0.0):0.00055,(V128RF-AACZ03106490.1-ighv:0.0,V1RF-AJFE01003265.1-ighv:0.0):0.05618)0.299:0.01101)0.876:0.02192)0.779:0.01117)0.778:0.01077,(V58RF-JABR01091180.1-ighv:0.06210,(V268RF-AQIA01066387.1-ighv:0.17282,((V144RF-CABD02117471.1-ighv:0.05470,(V173RF-AACZ03171037.1-ighv:0.02232,V125RF-AJFE01045439.1-ighv:0.01124)0.771:0.02000)0.697:0.01338,(V150RF-ABDC01471087.1-ighv:0.04484,((V96RF-JZKE01278271.1-ighv:0.08698,((((V135RF-CABD02117442.1-ighv:0.04207,V136RF-CABD02117444.1-ighv:0.00055)0.758:0.01648,(V122RF-AACZ03098145.1-ighv:0.03435,V125RF-AACZ03098176.1-ighv:0.03528)0.871:0.02323)0.964:0.06839,V89RF-ABGA01243345.1-ighv:0.00055)0.780:0.02288,V73RF-ABGA01174988.1-ighv:0.03556)0.898:0.04356)0.549:0.01554,(V139RF-CABD02117457.1-ighv:0.01026,V118RF-AACZ03097912.1-ighv:0.01190)0.995:0.10935)0.889:0.04696)0.923:0.07097)0.881:0.05212)0.542:0.01102)0.464:0.00778)0.757:0.01092)0.807:0.00978)0.913:0.03130)0.000:0.00053)0.908:0.03025)0.794:0.00054);
