# Supplementary material for: Iterative Variable Gene Discovery from Whole Genome Sequencing with a Bootstrapped Multiresolution Algorithm
Source: Comput Math Methods Med. 2019 Feb 11;2019:3780245. doi: 10.1155/2019/3780245 (PMC6388353; doi:10.1155/2019/3780245)
Supplement: Supplementary Materials — supp_materialsV2.pdf: this is an updated document, which includes new figures requested by the reviewer. sequences_alignments.zip: these are genome sequence files that are relevant for reproducing some of the results. [file 3780245.f1.zip › 3780245.f1/sequences_alignments/bstrp_iteration_1.fasta]

>V0RF-AQIA01007569.1-iglv |(1992, 2302)|2.23956706436|(0.907,0.915,0.650)|1
SWAQSAPIQSPSVSGSLGQSVTISCTGTSSDIGRYNYVSWYRQQPGTTTKLMMYKVNMRP
SGVSDRFSGSKSGNTASLTISGLQAEDEADYYCSSYEASDT
>V1RF-AQIA01007574.1-iglv |(14067, 14370)|2.99798400013|(1.000,0.998,1.000)|1
SWAQAAPTQPPSVSGSPGQSVTISCTGTSSDIGGYNRVSWYQQHPGKAPKLMIYEVSKRP
SGVSDRFSGSKSGNTASLTISGLQAEDEADYYCSSYAGS
>V2RF-AQIA01007574.1-iglv |(37774, 38077)|2.98896000066|(0.997,0.994,0.998)|1
SAASYELTQPPSVSVSPGQTARITCSGDALPKKYAYWFQQKPGQSPVLIIYEDSKRPSGI
PERFSGSSSGTVATLTISGAQVEDEADYYCYSTDSSGNH
>V3RF-AQIA01007574.1-iglv |(45212, 45518)|2.21255915213|(0.857,0.637,0.903)|1
SVASYELTQPLSVSVALGQMARITCGGNNIGRKYVYWYQQKPDQAPVLVIYEDSKRPSGI
PEQFSGSNSGNTATLTIDGAQARDEADYYCQVWDSSTAHS
>V4RF-AQIA01007574.1-iglv |(48578, 48881)|2.98851611711|(1.000,1.000,0.989)|1
SWAQAALTQPPSVSGSPGQSVTISCTGTSSDIGGYNRVSWYQQHPGKAPKLMIYEVSKRP
SGVSDRFSGSKSGNTASLTISGLQAEDEADYYCSSYASS
>V5RF-AQIA01007575.1-iglv |(6771, 7074)|2.99899600001|(1.000,1.000,0.999)|1
SWAQAALTQPPSVSGSPGQSVTISCTGTSSDVGGYNYVSWYQQHPGKAPKLMIYDVSKRP
SGVSDRFSGSKSGNTASLTISGLQAEDEADYYCSSYAGS
>V6RF-AQIA01007575.1-iglv |(13644, 13941)|2.43174717894|(0.912,0.713,0.964)|1
SVASYELTQPPSVSVSPGQTAKITCSGEILAKKYARWFQQKPGQAPVLVIYKDSERPSGI
PERFSGSSSGTTVTLTVSGAQAEDEADYYCYSGDDNS
>V7RF-AQIA01007576.1-iglv |(8743, 9046)|2.98332422844|(0.999,0.986,0.999)|1
SAVSYELTQPPSVSVSPGQTARITCGGDNLGSKYVHWYQQKPAQAPVLVIYYDSDRPSGI
PERFSGSKSGNTATLTISGVEAGDEADYYCQVWDSSSDH
>V8RF-AQIA01007576.1-iglv |(19712, 20015)|3.0|(1.000,1.000,1.000)|1
SWAQAALTQPRSVSGSPGQSVTISCTGTSSDIGGYNYVSWYQQHPGTAPKLMIYEVSKRP
SGVSDRFSGSKSGNTASLTISGLQAEDEADYYCCSYAGS
>V9RF-AQIA01007576.1-iglv |(29309, 29606)|2.09563771127|(0.667,0.707,0.768)|1
SVASYELTQPPLVSVSPGQTARITCSGDVLKENYADWYQQKPGQAPVLLIHEDSKRPSGI
PERFSGSTSGHTTTLTISSTLSEDEADYSCFSGNENN
>V10RF-AQIA01007576.1-iglv |(37606, 37909)|2.5774905018|(0.993,0.768,1.000)|1
SAASYDVTQPRSVSVSPGQTARITCGGDNIGSKVVHWYQQKPAQAPVLVIYRDSNRPSGI
PERFSGSNSGNTATLTISGVEAGDEADYYCQVWDSSSDH
>V11RF-AQIA01007576.1-iglv |(45242, 45545)|2.98799200002|(0.996,0.995,0.997)|1
SVVSSELTQDPAVSVALGQTVRITCQGDSLRSYYASWYQQKPGQAPVLVVYGNNNRPSGI
PERFSGSSSGNTASLTITGAQVEDEADYYCDSWDSSGTH
>V12RF-AQIA01007576.1-igkv |(63773, 64083)|2.29811246694|(0.859,0.707,0.825)|1
SWAQAALTQPPSVSKSLGQSVTISCAGTSSGIASYSDVSWYQQHPGTAPRLLIYRVSNRP
SGVSDRFSGFKSGSTASLTISGLQAEDEAIYYCCSYRSGST
>V13RF-AQIA01007576.1-iglv |(72187, 72490)|2.97757605748|(0.994,0.985,0.999)|1
SATSYELTQPPSVSAASGQTARITCGGDNIGSKNVQWYQQKPAQAPVLVIYADSDRPSGI
PERFSGSNSGNTATLTISGVEAGDEADYYCQVWDSSSDH
>V14RF-AQIA01007584.1-iglv |(1279, 1588)|2.99092000218|(0.999,0.995,0.997)|1
SWAQSVLTQPPSASEAARKSVTISCSGSSSNIGSNSVSWYQQLPGTAPKLLIYYNDQRAS
GVSDRFSGSKSGTSASLAISGLQTEDEADYYCAAWDDSLSG
>V15RF-AQIA01007585.1-iglv |(7569, 7879)|2.30409798332|(0.968,0.877,0.716)|1
SLSQPVLTQPASLSASPGASASLTCTFSGGINVAGYHIFWYQQKPGSPPRYLLRYKSDSD
KGQGSGVPSRFSGSKDASANTGILRISGLQSEDEADYYCAI
>V16RF-AQIA01007586.1-iglv |(17179, 17489)|2.94940068997|(0.993,0.981,0.977)|1
SLSQPVLTQPTSLSASPGASARLSCTLSSGINVGSYSIYWYQQKPGSPPRYLLYYYSDSS
KHQGSGVPSRFSGSKDASANAGLLLISGLQSEDEADYYCAI
>V17RF-AQIA01007586.1-iglv |(27894, 28201)|2.93892188321|(0.975,0.969,0.997)|1
SWAQSVLTQPPSVSAVPGQKVTISCSGSSSNIGRSCVSWYQQVPGTAPKLLIYQDNKRPS
GVSDRFSGSKSGTSASLAITGLQTGDEADYYCSAWDSSLS
>V18RF-AQIA01007586.1-iglv |(32056, 32365)|2.88531575157|(0.952,0.998,0.944)|1
SWAQSVLTQPPSVSGDPGQRVTISCTGSSSNIGGYDVYWYQQLPGTAPKLLIYENNKRPS
GVSDRFSGSKSGTSASLAITGLQSEDEAEYYCETWDNSLNG
>V19RF-AQIA01007586.1-iglv |(37066, 37373)|2.98226023048|(1.000,0.987,0.996)|1
SWAQSVLTQPPSVSGDPGQRVTISCTGSSSNIGGYYVYWYQQFPGTAPKLLIYDNNKRPS
GVSDRFSGSKSGTSASLTITGLQPGDEADYYCGAWDSSLS
>V20RF-AQIA01007586.1-iglv |(42885, 43192)|2.97394052476|(0.998,0.995,0.982)|1
SWAQSVLTQPPSVSGAPGQRVTISCTGSSSNIGGYYVSWYQQLPGTTPKLLIYQDNKRPS
GVSDRFSGSKSGTSASLTITGLQTEDEADYYCLSYDSSLS
>V21RF-AQIA01007587.1-iglv |(5318, 5628)|2.73559500557|(0.979,0.848,0.975)|1
SLSQPVLTQPTSLSASPGASVRLTCTLRSGISVGGYNIHWYQQKPGSPPRYLLYYYSDSN
KGQGSGVPSRFSGSKDASANAGILLISGFQSEDEADYYCTT
>V22RF-AQIA01007587.1-iglv |(10143, 10452)|2.99596000066|(1.000,0.997,0.999)|1
SWAQSVLTQPPSASGAPGQSVTISCSGSSSNIGSNYVNWYQQLSGKAPKLLIYNNNQRPS
GVPDRFSGSKSGTSASLAISGLQSEDEADYYCAAWDSSLSG
>V23RF-AQIA01007588.1-iglv |(1406, 1715)|2.99493200206|(1.000,0.996,0.999)|1
SWAQSVLTQPPSASGAPGQSVTISCSGSSSNIGSNDVYWYQQFPGTAPKLLIYYSNQRPS
GVPDRFSGSKSGTSASLAITGLRSEDEADYYCAAWDDSLSS
>V24RF-AQIA01007588.1-iglv |(19880, 20189)|2.5024904774|(0.980,0.736,1.000)|1
SWAQSVLTQPPSASGAPGQSVTISCSGSSSNIRGNGVHWYQQLSGMAPKLLIYNNNQRPS
GVPDRFSGSKSGTSASLAITGLRSEDEADYYCEAWDNSLSG
>V25RF-AQIA01007589.1-iglv |(4140, 4447)|2.99186400565|(1.000,0.997,0.995)|1
SWAQSVLTQPPSVSGAPGQRVTISCTGSSSNIGGYYVQWYQQLPGTAPKLLIYENNKRPS
GVSDRFSGSQSGTSASLTITGLQSEDEADYYCQSYDSSLS
>V26RF-AQIA01007589.1-iglv |(26788, 27098)|2.92757765396|(0.988,0.959,0.984)|1
SLSQPVLTQPTSLSASPGASARLTCTLSSGISVGSYRIFWYQQKPGSPPRYLLNYHTDSD
KHQGSGVPSRFSGSKDASANAGILLISGLQSEDEADYYCMI
>V27RF-AQIA01007590.1-iglv |(12131, 12441)|2.97330128432|(1.000,0.980,0.995)|1
SWAEVVFTQPHSVSGSPGQTVTISCTRSSGSIGSSYVYWYQQRPGSAPTTVIYKDNQRPS
GVPDRFSGSIDSSSNSASLTISGLKSEDEADYYCQSYDSSG
>V28RF-AQIA01007590.1-iglv |(59340, 59647)|2.03412237283|(0.958,0.633,0.841)|1
SWAQSVLTQPPSVSAAPGQRVTISCSGSSFNFRRYYVSWYQQLPGAAPKLLIYDVSKRPS
GVLDRFSGSQSGTSTTLGITGLQSEDEADYYCSAWDSSLS
>V29RF-AQIA01007599.1-igkv |(24865, 25175)|1.91241313954|(0.651,0.689,0.592)|1
SLSQPVLTQSPSASASLGASVKLTCTLSSGHSSYAIAWHQQQQGKAPRYLMRLNSDGSHS
KGDGIPDRFSGSSSGAERYLTISNLQSEDEADYYCQTWDTG
>V30RF-AQIA01007600.1-iglv |(7012, 7324)|2.97330342777|(0.978,1.000,0.999)|1
SWAEVVFTQPHSVSGSPGQTVTISCTRSSGSIDSKYVQWYQQRPGSAPTTVIYKDNQRPS
GVPDRFSGSIDSSSNSASLAISGLKSEDEADYYCQSADGSYN
>V31RF-AQIA01007605.1-iglv |(38320, 38626)|2.98976801985|(1.000,0.997,0.993)|1
DSETVVTQEPSLSVSPGGTVTLTCGLSSGSVSTSNYPSWYQQTPGQAPRTLIYSTNTRPS
GVPDRFSGSILGNKAALTITGAQADDESDYYCTLYMGSGI
>V32RF-AQIA01007915.1-ighv |(45465, 45774)|2.13464024996|(0.945,0.986,0.596)|1
VQCEVQLVEPGGGLVQPGGSMRLSCAASGFTFSSYGMSWVHQTPGKGLEWVSTISGNGVS
TWYPDAVKGQFTISRNNTKNSLYLQMNSLSVEDIAVYYCAK
>V33RF-AQIA01009600.1-iglv |(7837, 8140)|2.99696400065|(1.000,1.000,0.997)|1
SWAQSAPTQPPSVSGSPGQSVTISCTGTSSDVGGYNYVSWYQQHPGKAPKLMIYGVSKRP
SGVSDRFSGSKSGNTASLTISGLQAEDEADYYCCSYTTS
>V34RF-AQIA01009600.1-iglv |(20648, 20951)|2.78949664257|(0.985,0.977,0.875)|1
SAASYDLTQPPSVSVSPGQTARITCGGDNIGSEVVNWYQQKPPQAPVLVIYADSERPSGI
PERFSGSNSGNTATLTISGVEAGDEADYYCQVWDISSDH
>V35RF-AQIA01009608.1-iglv |(4448, 4751)|2.89190776217|(0.989,0.942,0.971)|1
SWAQSALTQPPSVSKSLGQSVTISCTGTSSDIGGYNGVSWYQQHSGTAPRLLIYEVSKRP
SGVSDRFSGSKSGNTASLTISGLQAEDEADYYCCSYRSG
>V36RF-AQIA01017094.1-igkv |(176237, 176552)|2.91377692984|(0.996,0.989,0.941)|1
SSGDIVMTQTPLSLSVTPGEPASISCRSSQSLLHSNGYTYLHWYLQKPGQSPQLLIYLVS
NRPSGVPDRFSGSGSGTDFTLKISRVEAEDVGVYYCEQTLQTP
>V37RF-AQIA01017096.1-igkv |(35522, 35822)|2.99294800078|(0.998,1.000,0.995)|1
ARCDIQMTQSPSSLSASVGDRVTVTCRASQGINKELSWYQQKPGKAPTLLIYAASSLQTG
VSSRFSGSGSGTDYTLTISSLQPEDVATYYCLQDYNTP
>V38RF-AQIA01017096.1-igkv |(53919, 54234)|2.62064403777|(0.878,0.870,0.873)|1
SSGDIVMTQTPLSLPVTPGEPASISCRSSQSLLHSNGYTYLYWYLQKPGQSPQLLMYFAS
YRASGVPDRFSGSGSGTDFTLEISRVEAEDIGVYNCMQGTQLP
>V39RF-AQIA01017097.1-igkv |(8073, 8388)|2.66799361059|(0.987,0.832,0.947)|1
SSGDIVMTQTPLSLPVTPGEPASISCRSSQSLLDSDGYTCLDWYLQKPGQSPQLLIYEVS
NRVSGVPDRFSGSGSGTDFTLKISRVEAEDVGVYYCMQSIEFP
>V40RF-AQIA01017097.1-igkv |(38546, 38864)|2.60435708003|(0.982,0.956,0.797)|1
SSGDIVMTQTPLSLPVTPGEPASISCRSSQSLLDSEDGNTYLDWYLQKPGQSPQPLIYEV
SNRASGVPDRFSGSGSDTDFTLKISRVEAEDVGVYYCMQYTHIP
>V41RF-AQIA01017097.1-igkv |(56327, 56642)|1.89929430417|(0.708,0.548,0.951)|1
TSGDILLTQTPLSLPVTPGEPASISCRSSQSLLHSNGNTYLHCYLQKPGQSPQLLIYEVS
NRASGVPDRFSGSGSDTDFTLKINLVEAEDVGVYSCMQTTQWP
>V42RF-AQIA01017097.1-igkv |(61240, 61555)|2.5999130834|(0.902,0.813,0.917)|1
SSGDIVMTQTPLSLPVTLGEPASISCRSSQSLVYSDGKTYLYWYLQKPGQSPQLLMYLVS
KRASGVPDKFSGSGSGTDFTLKISRVEAEDVGVYYCMQALRSP
>V43RF-AQIA01017097.1-igkv |(64674, 64989)|2.48355162165|(0.922,0.772,0.882)|1
SSGDIVMTQTPLSLPVIPGEPASISCRSSQSLLHSDGYTYLHWYLQKPGQSPQLLIYLGS
NCASGVPDRFSGSGSGTDFTLKISRVEAEDIGIYYRMQNLQIP
>V44RF-AQIA01017097.1-igkv |(69341, 69641)|2.99298400013|(0.997,0.997,0.999)|1
ARCDIQMTQSPSSLSASVGDTVTITCRASQGINNELAWYQQKPGKAPTLLLYSGSSLHTG
VPSQFSGSGSGTDFTLTISSLQPEDVATYYCRQDYNTP
>V45RF-AQIA01017097.1-igkv |(77437, 77752)|2.68757278986|(0.958,0.822,0.981)|1
SSGDIVMTQTPLSLPVTPGEPASISCRSSQSLLDSDGYTHLHWYLQKPGQSPQLLMYLVS
NRASGVPDRFSGSGSGTDFTLKISRVEAEDVGVYYCMQTLQTP
>V46RF-AQIA01017099.1-igkv |(11233, 11548)|2.56516500837|(0.995,0.836,0.881)|1
TSGDIVMTQTPLSLPVTPGEPASISCRSSQSLLHSNGYTYLFWYLQKPGQSPQLLIYLVS
NRASGVPDRFSGSGSGTDFTLKISRVEAEDVGVYYCLQDIQLP
>V47RF-AQIA01017099.1-igkv |(19461, 19761)|2.99899600001|(1.000,1.000,0.999)|1
ARCDIQMTQSPSALSASVGDRVTISCRASQNIYSGLAWYQQKPGKAPKLLIYAASRLQSG
IPSRFSGSGSGTDFTLTISSLQPEDSAAYYCQQVYSNP
>V48RF-AQIA01017100.1-igkv |(7491, 7806)|2.77658470524|(0.995,0.881,0.957)|1
TSGDIVMTQTPLSLPVTPGEPASISCRSSQSLLHSDGYTYLDWYLQKPGQSPQLLIYLGS
KRASGVPDRFSGSGSGTDFTLKISRVEAEDVGVYYCMQGTQLP
>V49RF-AQIA01017105.1-igkv |(1136, 1436)|2.99696400065|(1.000,0.997,1.000)|1
ARCDIQMTQSPSSLSASVGDTVTITCRASQGISNDLAWYQQKPGETPKLLIYEASSLQSG
IPSRFSGSGSGTDFTLTISSLQSEDFATYYCQHYYSTP
>V50RF-AQIA01017109.1-igkv |(27445, 27743)|2.71861721881|(1.000,1.000,0.829)|1
ARCDIQMTQSPSSLSASVGDRVTITCQASQGISNNLAWYQQKPGKVPKLLIYKASTLQSG
VPSRFSGSGSGTDFTLTISSLQPEDFATYYCQHGYGI
>V51RF-AQIA01017115.1-igkv |(12703, 13003)|2.93437797317|(0.999,0.950,0.995)|1
ARCDIQMTQSPSSLSASVGDRVTITCRASENVNNYLHWYQQKPGKAPKLLIYAASTLQSG
VPSRFSGSGSGTDYTLTISSLQSEDVATYYCQHSYGTP
>V52RF-AQIA01017115.1-igkv |(28053, 28368)|2.23481256828|(0.975,0.741,0.814)|1
SSGDIVMTQTPLSLPVTPGEPASISCRSSQSLLHSDGNTYLYWYLQKPGQPPRLLIYRVS
NRFSGVPDRFSGSGSGTDFTLKISRVKAEDVGVYYCMQALQTP
>V53RF-AQIA01017115.1-igkv |(33048, 33363)|2.64513874128|(0.968,0.822,0.940)|1
SSGDIVMTQTPLSLPITPGEPASISCRSSQSLLHSNGNTYFHWYLQKPGQSPQLLIYGGS
NRASGVPDRFSGSGSGTDFTLKISKVEAEDVGVYYCVQAIAFP
>V54RF-AQIA01017115.1-igkv |(51966, 52281)|2.32477673095|(0.981,0.681,0.966)|1
SSGDIVMTQTPLSLPVTPGEPASISCRSSQSLLHSNGNTYLYWYLQKPGQPPRLLIYRVS
NRFSGVPDRFSGSGSGTDFTLKISRVEAEDVGVYYCMQALQTP
>V55RF-AQIA01017115.1-igkv |(73836, 74136)|3.0|(1.000,1.000,1.000)|1
ARCDIQMTQSPSSLSASVGDRVTITCRASQGISNWLAWYQQKPGKAPKLLIYRASNLETG
VPSRFSGSGSGTDFTLTISSLQPEDIATYYCQQHDNSP
>V56RF-AQIA01017115.1-igkv |(81810, 82124)|2.3035660349|(0.977,0.820,0.765)|1
SSGDIVMTQTPLSLPVTPGEPASISCRSSQSLLHSNGNTYLHWYLQKPGQSPRLLIYKVT
NRESGVPDRFSGSGSGTDFTLKISRVEPEDVGVYYCMQSTKDP
>V57RF-AQIA01017139.1-igkv |(30471, 30771)|2.82142557224|(0.917,0.983,0.941)|1
TTGQVILTQSPATLSLSPGERATLSCRASQSVSSYLAWYQQKPGQAPRLLIHSASSRATG
IPDRFSGSGSGTEFTLTISSLEPEDVGVYHCYQYYSGY
>V58RF-AQIA01017139.1-igkv |(39707, 39995)|2.21939310056|(0.700,0.793,0.872)|1
TILTQSAAFVSATPGDKVTISCKASQDIDDDMNWYQQEPGEAPKLIIKDATTLVSGIPPR
FSGSGYGTDFTLTINNVESEDAAYYFCLQHDNFP
>V59RF-AQIA01017140.1-igkv |(859, 1159)|2.97897252412|(0.999,0.998,0.983)|1
AKCDIQMTQSPTFLSASVGDRVTIACRASQSINKGLAWYQQKPGKAPKLLISYASNLYTD
VPSRFSGSGSGTDFTLTISSLQPEDAATYYCFQYNSYP
>V60RF-AQIA01017142.1-igkv |(9949, 10237)|1.76475458883|(0.610,0.532,0.845)|1
TILTQSPAFVSATPGDKVTISCRAGQDIDDDMNWYQQEPGEAPKLIIKDATTLVSGIPPQ
FSGSGYGIDFTLTINSMKSEDTAYYFCQQRDNTP
>V61RF-AQIA01017150.1-igkv |(11178, 11496)|2.95954053568|(0.996,0.982,0.983)|1
ACGDIVMTQSPDSLAVSLGERVTINCKSSQSLLYSSNNKNYLAWYQQKPGQAPKLLIYWA
STRESGVPNRFSGSGSGTDFTLTISGLQAEDVAVYYCQQYYSTP
>V62RF-AQIA01046502.1-trgv |(39505, 39815)|1.58219502482|(0.888,0.583,0.640)|1
SQKSSNLEGKTKSITGPTGSPAEITCDLPGVSTLYIHWYLHQEGKAPQRLLYYEPYYFTV
VLESGISPGKYDTASTRKSWNLRLQNLIENDSGVYYCATWD
>V63RF-AQIA01046502.1-trgv |(44235, 44548)|2.98851611711|(1.000,1.000,0.989)|1
SQKSSNLEGRTKSVTRPTGSSAEITCDLPEVSSFYIHWYLHQEGKAPQRLLYYDSSNSRV
VLESGISPGKYDTYGSTRSNLRLILRNLIENDSGVYYCANWD
>V64RF-AQIA01046502.1-trgv |(48629, 48942)|2.94542595418|(0.999,0.971,0.980)|1
GQKSSNLEGITKSVTRPTGSSAEITCDFSGDSNFYIHWYLHQEGKVPQRLLYYDVSNSRD
VLESGLSPGKYYTHTRTRWSWILILRNLIENDSGVYYCANWD
>V65RF-AQIA01046502.1-trgv |(58146, 58459)|2.86468262014|(0.989,0.951,0.940)|1
SQKSSNLEGRTKSVTRPTGSSAEITCDLPEVSSFYIHWYLHQVGKAPQRLLYYDTSNSRV
VLESGISPGKYDSYGSTRNNLRLRLRNLIENDSGVYYCANWD
>V66RF-AQIA01048525.1-trbv |(36409, 36725)|2.32879894835|(0.828,0.736,0.801)|1
HTEPEVTQTPSHQVTQMGQEVILRCVPIPNHLNFYWYRQILGQKVEFLVIFFDNNISEKS
EIFEDRFSVGRPDGSNFTLKIKSTKLEDSAMYFCASSEATALQ
>V67RF-AQIA01048525.1-trbv |(43379, 43676)|2.25248899132|(0.950,0.973,0.644)|1
SLDTAVSQTPKYLVTQTGKNEYLKCEQNLGHDTMYWYKQDSKKLLKIMFSYNNKQLIINE
TVPNRISPDSPDKAHLNLHIKSLELGDSAVYFCASSQ
>V68RF-AQIA01048525.1-trbv |(48020, 48317)|2.93564403777|(0.983,0.975,0.978)|1
PIDSGVTQTPKHLVMGMTNKKSLKCEQHMGHRAVYWYKQKVKKPPEIMFMYNYEKLSINE
SVPSRFSPECSQSSLFYLHLRALQPEDSALYLCASSQ
>V69RF-AQIA01048525.1-trbv |(56253, 56551)|2.37503341045|(0.854,0.884,0.715)|1
TQTPSHQVTQMGQEVILRCVPISNHFYFYWYRQILGQKVEFLVSFYNGKISEQSEIFEDQ
FSVGRSDGVHFTLKIKSTKLEDSAMYFCASSEATALQ
>V70RF-AQIA01048525.1-trbv |(63840, 64138)|2.35222170617|(0.973,0.939,0.701)|1
VSQTPKYLVTQTGKEESLKCEQNLGHDTMYWYKQDSKKLLKIMFSYNNKKLFINETVSNR
FSPDSPDKARLILHIKPLELGDSAVYFCASSQGTALQ
>V71RF-AQIA01048525.1-trbv |(72334, 72634)|2.31301419969|(0.877,0.782,0.751)|1
HTEPEVTQTPSHQVTRMGQEVILRCVPIPNHLYFYWYRQILGQKVEFLVYFYNGEISEKS
EIFEDRFSVGRSDGVHFTLKIKSTKLEDSATYFCASSE
>V72RF-AQIA01048525.1-trbv |(78854, 79151)|2.96584034555|(0.997,0.986,0.984)|1
PLDTAVFQTPKYLVTQMGKKESLKCEQNLGHDTMYWYKQDSKKLLKIMFIYSNKEPILNE
TVPNRFSPESLDKAHLNLHIKSVELGDSAVYFCASSQ
>V73RF-AQIA01048525.1-trbv |(83218, 83515)|2.88022600405|(0.988,0.923,0.986)|1
PTDTGVTQTPKHLVMEMTNKKSLKCEQHMGHNAMYWYKQKAKKPPELMFVYQYEKLSINE
SVPSRFSPECSKSSLLYLHLRALQPEDSALYLCASSQ
>V74RF-AQIA01048525.1-trbv |(94178, 94494)|2.62242686576|(0.931,0.920,0.820)|1
PVEAGVTQTPRSLIKMRGQQATLSCSPISGHRSVYWYQQTPGQGLQFLFEYFSETQRQKG
NFSNRFSGRQFSNSRSEMNVSTLELGDSALYLCASSLAQPYKA
>V75RF-AQIA01048526.1-trbv |(5857, 6154)|2.99298400013|(0.997,0.999,0.997)|1
PANADVTQSPKFQILKTGQSMTLQCAQDMNHNSMYWYRQDPGMGLRLIHYSATEDTTDPG
EVPDGYSVSRLNKKEFLLRLESAALSQTSVYFCASSE
>V76RF-AQIA01048526.1-trbv |(20529, 20842)|2.60220802314|(0.908,0.948,0.799)|1
SLDTAVSQTPKYLVRQTGKNESLKCEQNLGHNAMYWYKQDSKKLLKIMFIYNNKEPILNE
TVPYRFSPKSPDKAHLNLHIKSLELGDSAVYFCASSQDTALQ
>V77RF-AQIA01048526.1-trbv |(23960, 24257)|2.62929316693|(0.941,0.965,0.801)|1
PMETGVTQTPRHLVMGMTNKKSLKCEQHLGHNAMYWYKQKAKKPPELMFIYNFKERAENN
SVPSRFSPECPDSSHLHLHLRALQPEDSALYLCASSQ
>V78RF-AQIA01048526.1-trbv |(35703, 36000)|2.98021230726|(0.998,0.999,0.984)|1
PVNAGVTQTPKFQVLKTGQNMTLKCAQDMNHDRMYWYRQDPGMGLRLIHYSAGEGSTEKG
EVPNGYNASRLNKKDFLLRLESAAPSQTSMYFCASSE
>V79RF-AQIA01048527.1-trbv |(3129, 3429)|2.98696000066|(0.995,0.994,0.998)|1
HTGAGVSQSPRNKVTEEGKDVVLRCDPISGHTALYWYRQSLGKGLEFLIYFQGNDAPDKS
GLPSGRFSAERTEGSVSTLKIQRTEQGDSAVYLCASSL
>V80RF-AQIA01048527.1-trbv |(25700, 26000)|2.92504466822|(0.992,0.985,0.954)|1
HTGAGVSQSPSNKVTEKGKDVELRCDPISGHAVLYWYRQNLGQGLEFLIYFQGTGAVDDS
GLRSDRVSATRPEGSVSTLKIQHTEQGDSAMYFCASSL
>V81RF-AQIA01048528.1-trbv |(4386, 4698)|2.48669981972|(0.876,0.839,0.800)|1
SVDTGVTQSPTHLIKTRGQQVTLRCSPISGHNTVSWYQQAPGQGPQFIFEYANELRTSEG
NFPHRFSGRQFRDYHSEMNVSALELGDSALYLCASSLAQPGR
>V82RF-AQIA01048528.1-trbv |(7069, 7365)|2.92257375156|(0.991,0.973,0.963)|1
SVDCGVTQTPKHLITAIGQQVTLRCSPRSGDRSVYWYQQSLGQGLQFLIQYYNGEERAKG
NILERFSAQQFADLHSELNLSSLELGDSALYFCASSE
>V83RF-AQIA01048530.1-trbv |(6133, 6424)|2.37577473|(0.920,0.947,0.695)|1
AGVAQSPRYKITGKSQTVTFWCDPISGHATLYWYRQILGQGPELLVQFQNKGVVDDSQLP
KDRFSAERLKGVDSTLKIQPAELGDSAVYLCASSL
>V84RF-AQIA01048530.1-trbv |(18692, 18989)|2.09299708361|(0.749,0.617,0.966)|1
HRDAGITQSPRYKVTETGRQVTLTCHQTWSHSYMFWYRQDLGHGLRLIHYSAGAGITDKG
EVPDGYVVSRSKTEDFLLTLESATRSQTSVRFCASSE
>V85RF-AQIA01048530.1-trbv |(27859, 28150)|2.40655330091|(0.923,0.918,0.719)|1
AGVAQSPRYKVIEKSQAVTFWCNPISGHATLYWYRQILGQGPELLVQFRNNDVVDDSQLP
KDRFSAERLKGVNSTLKIQPAELGDSAVYLCASSL
>V86RF-AQIA01048530.1-trbv |(44934, 45231)|2.98759608|(0.999,1.000,0.989)|1
PVNAGVTQTPKFQVLKTGQSMTLQCAQDMNHDYMYWYRQDPGMGLRLIHYSVGEGSTEKG
EVPDGYNVTRSNTEDFPLRLESAAPSQTSVYFCASSD
>V87RF-AQIA01048530.1-trbv |(49166, 49466)|2.93493271661|(0.996,0.951,0.996)|1
HTGAGVSQSPRYKVTKRGQDVALRCDPISGHDYLYWYQQALGQGPAFLTYFQDDAQRDKS
GLPNDRFSAERTEGSVSTLKIQRTEQGDSAVYLCASSL
>V88RF-AQIA01048530.1-trbv |(57090, 57380)|2.36865647942|(0.946,0.897,0.720)|1
QAGVTQSPTHLIKTRGQQVTLRCSPISGHTNVYWYQQALGQGPQFILWYDEEEERDRGTF
PHRFSGHQFPNYSSELNVNALEVEDSALYLCASSL
>V89RF-AQIA01048530.1-trbv |(68536, 68827)|2.97100040988|(0.994,0.979,0.999)|1
AGVSQSPRYKVTKRGQDVALRCDPISGHVALYWYRRTLGQGPELLTYFQNDAQPDKSGLP
SDRFSAERTEGSVSTLKIQRTEQGDSAVYLCASSL
>V90RF-AQIA01048530.1-trbv |(82295, 82592)|2.96953608204|(0.988,0.998,0.984)|1
LVNVGVTQTPKFQVLKTGQSMTVQCAQDMNHNFMYWYRQDPGMGLRLIHYSGAAGTTDKG
EVPSGYNVSRLNTEDFPLRLESADPSQTSVYICASSY
>V91RF-AQIA01048530.1-trbv |(86912, 87212)|2.95610798542|(0.999,0.964,0.998)|1
HTVARVSQSPRYKVTKRGQDVALRCDPISGHATLYWYQQALGQGPELLTYFSYEAQQDKS
GLPSDRFSAERPEGSVSTLKIQRTQQGDSAVYLCASSL
>V92RF-AQIA01048530.1-trbv |(109105, 109405)|2.96758870068|(0.998,0.990,0.981)|1
HTGAGVSQSPRYKVTERGQDVALRCDPISGHDYLYWYQQALGQGPELLTYFNYKAQPDKS
GLPNDRFSAERPEGSVSTLKIQRTEQRDSAVYLCASSL
>V93RF-AQIA01048530.1-trbv |(114175, 114471)|2.92769465218|(0.985,0.984,0.961)|1
PVDAGVTQSPTHLIKTRGQQVTLRCSPISGHTSVSWYQQALGQGPQLIFEYDRKEERVRG
NFPDRFSGRQFPNYSSELNVNASEMGDSALYLCASSL
>V94RF-AQIA01048530.1-trbv |(120217, 120514)|2.85823455755|(0.940,0.944,0.981)|1
PGNAGVNQTPKFQVLKTGQSMTLQCAQDMNHECMSWYRQDPGMGLRLIHYSVGAGITDKG
EVPNGYNVSRSNTEDFPLRLESAASSQTSVYFCGSSD
>V95RF-AQIA01048531.1-trbv |(13036, 13336)|2.94660443651|(0.997,0.957,0.999)|1
HTGAGVSQFPRYRVTKRGQDVTLRCDPISGHEYLYWYQQAPGQGPEFLTYFQNDAQPDKS
GLPNDRFSAERTEGSVSTLKIQRTEQGDSAVYLCASSL
>V96RF-AQIA01048531.1-trbv |(21500, 21796)|2.54693833901|(0.989,0.918,0.797)|1
PVDTGVTQSPTHLIKTRGQQVTLRCSPISGHSSVSWYQQALGQGPQFIFEYYEKEERERG
NFPGRFSGHQFPNYSSELNVSALLLGDSALYLCASSL
>V97RF-AQIA01048532.1-trbv |(3516, 3812)|2.99389600501|(1.000,0.999,0.995)|1
PVDAGVTQSPTHLIKTRGQQVTLRCSPISGHTSVYWYQQALGQGPQFIFQYYEKEERERG
NFPDRFSGHQFPNYSSELNVSALLLGDSALYLCASSL
>V98RF-AQIA01048532.1-trbv |(10804, 11101)|2.93794543819|(0.960,0.997,0.990)|1
PVNAGVTQTPKFQVLKTGQSMIVQCAQDMKHDYMFWYRQDPGMGLRLIYYSVTAGITTKG
EVPNGYNVSRKNTEDFLLRLESADPSQTSVYICASSE
>V99RF-AQIA01048532.1-trbv |(15109, 15409)|2.9899000027|(0.997,1.000,0.993)|1
HTGAGVSQSPRYKVIKKGQDVALRCDPISGHAALYWYQQALGQGPEFLTYFNYKAQPDKS
GLPNDRFSAERPEGSVSTLTIQRTEQQDSAVYLCASSL
>V100RF-AQIA01048532.1-trbv |(34644, 34944)|2.96802032645|(0.992,0.978,0.999)|1
HADAGVSQDPRHKITKTGQNVSFKCVPISEHNRLYWYRQTLGQGPEFLTYFQNEAQQDRS
GLFSDRFSAERPEGSISTLMIQHTEQGDSAVYLCASSL
>V101RF-AQIA01048532.1-trbv |(48704, 49001)|2.9939280013|(0.996,0.999,0.999)|1
HMDAGITQSPRHKITETGTPVTLRCHQTENHRYMYWYRQDLGNGLRLIHYSYGVEDTDKV
EVSDGYSVSRSKTEDFLLTLESAPRSQTSVYFCASSE
>V102RF-AQIA01048532.1-trbv |(59756, 60044)|2.1216485693|(0.938,0.704,0.776)|1
GVTQSPRYKITEKKQPVAFWCNPISGHNTLYWYRQNLGQGPELLVQYENEEAVDDSQLPK
DRFSAERLKGIDSTLRIQPAELGDSAVYLCASSL
>V103RF-AQIA01048532.1-trbv |(65345, 65645)|2.33970592664|(0.875,0.711,0.857)|1
HTDAGVIQSPRHEVTEMGKEVTLRCEPISGHSSLFWYRQTMMRGLEFLIYFNNKSPIDDS
GMPKDRFSATMPDASFSTLKIQPSEPRDSAVYFCASSL
>V104RF-AQIA01048532.1-trbv |(68613, 68913)|2.54065124219|(0.881,0.806,0.876)|1
HTDAGVIQSPRHEVTEMGKEVTLRCEPISGHTYLFWYRQTMMRGLEFLIYFNNKSPIDDS
GMPKDRFSAKMPDASFSTLKIQPSEPRDSAVYFCASSL
>V105RF-AQIA01048532.1-trbv |(83967, 84267)|2.16872981523|(0.780,0.951,0.632)|1
LIDAGVTQTPRHKVTEMGQEVTMRCQPILGHNTVFWYRQTVMQGLELLVYLRNKASLDDS
GMPKDRFSAEMPDASLATLKIQPSEPRDSAVYLCASGL
>V106RF-AQIA01048532.1-trbv |(91012, 91313)|2.49028373805|(0.933,0.910,0.761)|1
AGVTQFPSHRVIEKGQAVTLRCDPISGHDYLYWYRRVMGKEIKFLIYFLRAYTQDESGMP
NKRFSAERTGGTYSTLKVQPAELEDSGVYFCASSQDTV
>V107RF-AQIA01048533.1-trbv |(4086, 4383)|1.66077289828|(0.875,0.600,0.642)|1
HGDVMVIQNPRYQVTQLEKPVTLSCSQNLNHQVMYWYQQKPSQAPKLLFHYYDKDFNNEA
DTPDNFQSRRPNTSFCFLDIRSPGLEDAAVYLCASSK
>V108RF-AQIA01048536.1-trbv |(12317, 12613)|1.95231564266|(0.823,0.838,0.550)|1
LSNAGITQNPRHLVRRRGQEARLRCSPMKGHSHVYWYRQLPEEGLKFMVYLQKEKIIDES
GMPKEWFSAEFPKEGPSILRIQQAEQEDSAAYFCASS
>V109RF-AQIA01048536.1-trbv |(15427, 15724)|2.97685201038|(0.994,0.988,0.995)|1
TMDGRITQSPKYLFRKEGQNVTLSCEQNLNHDAMYWYRQDPGQGLRLIYYSQIVNDIQKG
DIAEGYSVSRERKESFPLTVTSAQRNPTAFYLCASSI
>V110RF-AQIA01048536.1-trbv |(33459, 33759)|2.30782383554|(0.935,0.836,0.730)|1
STDTKVTQRPRLLVKANKQKAKMDCVPVKGHSYVYWYRKKLDEELKFLVYFQNEEIIQKA
EIINKRFSAQCPQNSSCTLEIQSTESGDAALYFCASSK
>V111RF-AQIA01048536.1-trbv |(42435, 42735)|2.36508619003|(0.973,0.943,0.704)|1
SFHAEVTQTPGYLVKGKGQKTKMDCTPEKGHTYVYWYQQNQNKEFTFLISFQNEQVLQET
ELHKKRFSSQCPKNLPCSLEIPSSEPGDTALYLCASSQ
>V112RF-AQIA01048536.1-trbv |(54577, 54875)|2.93242949373|(0.988,0.998,0.952)|1
SMDADVTQTPRNKIAKTGKRIMLECSQTKGHDQMYWYRQDPGLGLRLIYYSFDVQDINKG
EISNGYSVSRQEQAKFSLSLESATPNQTALYFCATSD
>V113RF-AQIA01048536.1-trbv |(62410, 62707)|2.91082941374|(0.984,0.984,0.948)|1
LTEADIYQNPRHRVIGTGKKITLECSQTVGHDKMYWYQQDPGMELHLIHYSYGVNSTERG
DFSSESTVSRLRIEHFPLTLESASPSHTSQYLCASSE
>V114RF-AQIA01048536.1-trbv |(103279, 103576)|2.16948353029|(0.904,1.000,0.604)|1
PLEAQVTQNPRYLITVTGKKLTVTCSQNMNHEYMSWYRQDPGLGLRQIYYSVNVEMVDKG
DIPEGYNVSRKEKRNFPLILESPSPSQTSLYLCASSL
>V115RF-AQIA01048536.1-trbv |(108616, 108923)|2.98074003277|(0.996,0.997,0.988)|1
LVDVKVTQSSRYLIKRTGEKVFLECVQDMDHERMFWYRQDPGLGLRLIYFSYDVKLNEKG
DIPEGYSVSREKKERFSLILGSASTNQTSMYLCASSLSTA
>V116RF-AQIA01048536.1-trbv |(128401, 128704)|2.98232022844|(0.999,0.986,0.998)|1
SVFSAVVSQKPSRDVCQRGTSVTIQCQVDSQVTMMFWYRQQPGQSMTLIATANQGSEATY
ESGFVIDKFPISRPNLTFSTLTVSNTSPEDSSIYLCSVE
>V117RF-AQIA01058132.1-igkv |(2776, 3091)|2.43897071081|(0.964,0.762,0.887)|1
TSGDIVMTQTPLSLPVTPGEPASISCRSSQSLLHSGGKTYLYWYLQKPGQSPQLLIHEVS
NRASGVPDRFSGSGSGTDFTLKISRVEAEDVGVYYCMQGIQLP
>V118RF-AQIA01058133.1-igkv |(2029, 2329)|2.99696400065|(1.000,0.997,1.000)|1
ARCDIQMTQSPSSLSASVGDTVTITCRASQGISNDLAWYQQKPGETPKLLIYEASSLQSG
IPSRFSGSGSGTDFTLTISSLQSEDFATYYCQHYYSTP
>V119RF-AQIA01064136.1-trav |(11390, 11693)|2.12838361498|(0.760,0.702,0.696)|1
MCLILVTTGQNIDQPTEMTAMEGVIVQINCTYQTSGFNGLSWYQQHDGEAPTLLSYNVLD
GLEEKGRFSSFLSNSKRYSYLLLKELQMKDSASYLCAVR
>V120RF-AQIA01064137.1-trav |(6322, 6619)|2.39247058088|(0.911,0.693,0.981)|1
GLRAQLVTQPEDQVTVAEGNPLTVKCTYSVSGNPYLFWYVQCPNQGLQFLLKYITGDNLV
KGSYGFEAEFNKSQTSFHLKKPSALVSDSALYFCAVR
>V121RF-AQIA01064137.1-trav |(37156, 37446)|2.98171202074|(0.994,1.000,0.988)|1
MSRGEDVEQSLFLSVREGDISVINCTYTDSSSTYLYWYKQEPGAGLQLLTYILSNTDLKQ
DQRLTVLLNKKDKHLSLCIADTQTEDSAIYFCAES
>V122RF-AQIA01064137.1-trav |(47073, 47361)|2.00071848184|(0.963,0.885,0.595)|1
VKSQKIEQNSEALNIQEGKTATLTCNYTNYSPSYLQWYRQDPGRGPVFLLLIRENEKEKW
KERLKVTFDTTLKQSLFHITASQPADSATYLCAL
>V123RF-AQIA01064138.1-trav |(6177, 6471)|2.97409640489|(0.997,0.996,0.982)|1
GINGDSVVQTEGQVLLSEGDSLIVNCSYESTQYPSLFWYVQYPGEGLQLLLKAMKFNDKE
SNKGFEATYRKETTSFHLEKDSVQESDSAVYFCALS
>V124RF-AQIA01064138.1-trav |(19410, 19703)|2.99799600001|(0.999,0.999,1.000)|1
GSGKNQVEQSPQSLIILEGKNCTLQCNYTVSPFSNLRWYKQDTGKGPISLTIMTFSENTK
SNGRYTATLDADTKQSSLHITAAQLSDSASYICVVS
>V125RF-AQIA01064144.1-trav |(2574, 2880)|2.98061205453|(0.998,0.994,0.989)|1
VWSQQKEVEQDPGPFSVPEGATVTFNCTYSNSASQSFFWYRQDSRKEPKLLMSVYSSGNE
DGRFTAQLNRASQYISLLIRDSQLSDSATYLCAVRTQCSP
>V126RF-AQIA01064144.1-trav |(8015, 8312)|2.71827160044|(0.991,0.847,0.963)|1
GTRAQSVTQLDSQVSVSEGVPVLLRCNYSSSFSPYLFWYVQYPNQGLQLLLKYTSGTTLV
KGINGFEAEFKKSETSFHLTKASAHVSDAAEYFCAVN
>V127RF-AQIA01064146.1-trav |(4210, 4500)|2.98578801933|(0.997,0.999,0.990)|1
VNGENVEQHPSTLSVQEGDSSVIKCTYSDSASNYFPWYKQELGKGPQFIIDIRSNAHEKK
NQRITVLLNKTAKHFSLHITETQPGDSAVYFCAAS
>V128RF-AQIA01064146.1-trav |(26731, 27019)|2.98270803341|(0.998,0.990,0.995)|1
VWSQQKVEQNSGPLNVPEGAIASLNCTYSDSGSQSFFWYRQYSGQSPELLMSTYSSGDKE
DGRFTAQLDRASQYVSLLIRDSQLSDSATYLCAV
>V129RF-AQIA01064146.1-trav |(33220, 33517)|2.52997620956|(0.990,0.835,0.861)|1
GTRAQSVTQLDSQVSVSEGVPVLLRCNYSSSFSPNLFWYVQYPNQGLQLLLKYISGTTLV
KGINGFEAEFKKSETSFHLTKASAHVSDAAEYFCAVS
>V130RF-AQIA01064146.1-trav |(38786, 39083)|2.93996483513|(0.996,0.997,0.954)|1
TARAQSVTQPDIHITVSEGASLELRCNYSYGATPSLFWYVQSPGQGLQLLLKYFSGDTVV
QGIKGFEAEFKRSQYSFNLRKPSVHWSDAAEYFCAAG
>V131RF-AQIA01064146.1-trav |(52629, 52922)|2.91423800393|(0.999,0.998,0.934)|1
VSRGESVGLHLPTVTVQEGDNSVINCTYSDSASDYFLWYKQESGKGPQSIMDIRSNMAKR
QGQRLTVLLNKTMKHLSLQIAATEPGDSAVYFCAEN
>V132RF-AQIA01064146.1-trav |(58513, 58814)|2.94950546622|(1.000,0.991,0.964)|1
SGIAQKITQTQPAMFVQEKEAVTLDCTYDTSDQNYGLFWYKQPSSGEMIFLILQMSYDKQ
NATEGRYSLNFQKARKSVNLVISASQVGDSATYFCAMR
>V133RF-AQIA01064146.1-trav |(76833, 77127)|2.98742416586|(1.000,1.000,0.988)|1
RTRGDSVTQMEGPVTLSERAFLTINCTYTATGYPSLFWYVQYPGEGPQLLLKAAKTDEKG
SNKGFEATYRKETTSFHLKKDSVQESDSAVYFCALS
>V134RF-AQIA01064146.1-trav |(101455, 101748)|3.0|(1.000,1.000,1.000)|1
VWSQQKEVEQNPGPLSVPEGATASLNCTYSNSAFQYFMWYRQYSRKGPQLLIYIYSSGNK
EDGRFTAQVDKSSKYISLFIRDSQPSDSATYFCAMS
>V135RF-AQIA01064146.1-trav |(114433, 114733)|1.70345580523|(0.906,0.769,0.531)|1
GTRAQSVTQLDSQVPVFEEAPVLLRCNYSSSSVSVYLFWYVQYPNQGLRLLLKYLSGPTL
VKGINGFEAEFKKSETSFHLRKPSAHISDTAEYFCAVS
>V136RF-AQIA01064148.1-trav |(10272, 10559)|2.99596000066|(1.000,0.999,0.997)|1
VNSQQGEEDPQALSIQEGENATMNCSYKTSINNLQWYRQDSGRSLVQLVLIRSNEREKNS
GRLRVTLDTSKKSSSLLITASRAADTASYFCATD
>V137RF-AQIA01064149.1-trav |(7521, 7812)|2.95226014987|(0.978,0.989,0.986)|1
RTNGDSVTQTEGPVTLPERAALTLNCTYQTSYSAFIFWYVQYPNKEPELLLKSSENQETN
SRGFQASHVKSDSSFHLEKPSVQLSDSAVYYCVLR
>V138RF-AQIA01064149.1-trav |(10740, 11043)|2.91184034555|(0.979,0.968,0.966)|1
SSMAQKVTQAQTEISVVEKEDVTLDCVYETRDTTYYLFWYKQPPSGELVFLVRQNSFDEQ
NEINGRYYSNFQKSTSSFNLTITASQVVDSAVYFCALNE
>V139RF-AQIA01064151.1-trav |(18011, 18298)|2.94701938908|(0.996,0.990,0.965)|1
LSGEDQVTQSPEALSLQEGESSSLNCSYTVSGLRGLFWYRQDPGKGPEFLFSLYSAGEEK
EKERLKATLTKKESFLHITGPKPEDSATYLCAVQ
>V140RF-AQIA01064151.1-trav |(28358, 28657)|2.20614491302|(0.851,0.625,0.970)|1
VSSKQEVTQIPAALSVPEGDNLVLNCSFTDSAIYNLQWFRQDPGKGLTSLLLIQSSQREQ
TSGRLNASLDKSSGRSTLYITASQPSDSATYLCAVRHS
>V141RF-AQIA01064156.1-trav |(10499, 10811)|1.67215213667|(0.716,0.512,0.628)|1
VIGIQVEQSPPDLILQEGANSTLRCNYSATANNLQWFHQNPWGQLINLFYIPSGTKQNGR
LSATTVTKERYSFLHISSSQTTDSGIYFCAVESQCSPGTCSL
>V142RF-AQIA01064156.1-trav |(24958, 25273)|1.83843309631|(0.808,0.565,0.712)|1
GVSGQQKEESDRQQVKQSPQSLIVQKGGISIINCAYENSAFDYFPWYRQFPGKGPALLIA
ISSAASEKEEGRFKIFFNKSAKNFSLHIMDSQPGDSATYFCAA
>V143RF-AQIA01064159.1-trav |(7752, 8051)|2.49517198256|(0.953,0.972,0.739)|1
VNGQQIMQIPQYQHVQEGEDFTTYCNSSTTLNNIQWYKQRPGGHPVFLITLVKSGEVKKQ
KRLIFQFGEAKKNSSLHITATQTTDVGTYFCAGHSAPQ
>V144RF-AQIA01064159.1-trav |(18642, 18932)|2.11987336757|(0.905,0.612,0.894)|1
TIIDAKTTQPTSMDCAEGRAANLPCNHSTISGSEYIHWYRQIHSQGPQYVIHGLKNNETN
AMASLIITEDRKSSTLILPHATLRDTAVYYCIVRV
>V145RF-AQIA01064165.1-trav |(18360, 18659)|2.85167212368|(0.974,0.959,0.928)|1
VNGQQIMQIPQYQHVQEGEDFTTYCNSSTTLSNIQWYKQRPGGHPVFLIMLVKSGEVKKQ
KRLTFQSGEAKKNSSLHITATQTTDVGTYFCAGHSAPQ
>V146RF-AQIA01064166.1-trav |(47951, 48275)|2.01789335223|(0.667,0.861,0.634)|1
VNSQQKNDDQQVKQKPPSLSVQEGGISILNCDYTNSMFDYFVWYKKYPAEGPTFLISIRS
VKDKNEEGRFTVFLNKSAKHLSLHIGASQPGDSAVYLCAASAQCSP
>V147RF-AQIA01064166.1-trav |(53434, 53721)|2.26580958526|(0.785,0.712,0.790)|1
VRSQQPVQSPQAVILQEGEDAIINCNSSKALYSVLWYRQKHGEAPIFLMILLKGGEQKSH
DKIVATFNEKKQQSSLYLMASQLSYSGTYFCGAE
>V148RF-AQIA01064166.1-trav |(81458, 81745)|2.02771199451|(0.645,0.771,0.896)|1
VTSQELEQSPQSLIVQEGKNLTINCTSSKTLYGLHWYKQKYGEGLIFLMMLQQGGEEKSH
EKITAKLDEKKQQSFLHITASQPSHAGIYLCGGD
>V149RF-AQIA01064166.1-trav |(99136, 99426)|2.4357332133|(0.878,0.731,0.915)|1
VSSEDKVMQNPLSLVVHEGDTVTLNCSYEVVNFRSLLWYKQEKKAPIFLFTLTSSGIEKK
SGRLSSILDKKDLFSILNITATQTRDSAVYLCAVE
>V150RF-AQIA01064166.1-trdv |(135908, 136209)|2.85823455755|(0.970,0.966,0.929)|1
SGMAQTVTQSQQEMSVQEAETVILSCTYDTSESNYYLFWYKQPPSRQMILIIRQEAYKQQ
NATENRFSVNFQKAAKSFSLKISDSQLGDAAMYFCAFM
>V151RF-AQIA01064166.1-trav |(145402, 145702)|2.9659815877|(0.999,0.978,0.991)|1
SGMAQTVTQSQPEMSVQEAETVTLSCTYDTSDSDYYLFWYKQPPSRQMILIIRQEAYKQQ
NATENRFSVNFQKATKSFSLKISDSQLGDAAMYFCAYR
>V152RF-AQIA01064166.1-trav |(168980, 169268)|2.99496000066|(0.999,1.000,0.996)|1
LSGELKVGQNPLFLSTQEGKNYTIYCNYSTASDRLYWYRQDPGKSLESLFVLLSNGAVKQ
EGRLMASLDTKARLSSLHITAALQDLSATYFCAV
>V153RF-AQIA01064167.1-trav |(16150, 16452)|1.58264358342|(0.602,0.452,0.879)|1
VSAAKNEVEQSPQDLTAQEGEFITINCSYSIGINSLHWLQQHPGGGIVSLFMLSSEKKKN
GRLIATINIQERHSSLHITASQPRDSAIYICAVRHSALQ
>V154RF-AQIA01075814.1-ighv |(1456, 1765)|2.99698000014|(1.000,0.999,0.998)|1
VLSQVQLQESGPGLVKPSETLSLTCAVSGGSISGYYWNWIRQPPGKGLEWIGYIGGSSGS
TYYNPSLKSRVTISTDTSKNQFSLKLSSVTAADTAVYYCAR
>V155RF-AQIA01075814.1-ighv |(38413, 38722)|2.73923939998|(0.994,0.946,0.869)|1
AHSQVQLVQSGAEVKKPGSSVKVSCKASGYTFTDYYMHWVRQAPGQGLEWMGEINPKTGG
TNYAQKFQGRVTMTRDTSTSTAYMELSSLRSEDTAVYYCAR
>V156RF-AQIA01075814.1-ighv |(41318, 41631)|2.99593600205|(1.000,0.996,1.000)|1
VQCEVQLVESGGGLVQPGGSLRLSCAASGFTFGDYGMSWVRQAPGKGLEWVGRIRNKANS
YTTEYAASVKGRFTISRDDSKNTLYLQMSSLKTEDTAVYYCT
>V157RF-AQIA01075814.1-ighv |(48089, 48398)|2.99899600001|(1.000,1.000,0.999)|1
VQCEVQLVESGGGLVQPGGSLRLSCAASGFTFSSYDMSWVRQAPGKGLEWVSFISNTGKT
IYYADSVKGRFTISRDNAKNSLSLQMSSLRAEDTAVYYCTR
>V158RF-AQIA01075818.1-ighv |(5347, 5656)|2.30989020836|(0.872,0.685,0.884)|1
VLSQVQLQESGPGLVKPSETLPLTCTVSGASISSNYWSWIRQPPGKGLEWIGRIYGSGGS
TDYNPSLKSRVTISIDTSKNQFSLKLSSVTAADTAVYYCAR
>V159RF-AQIA01075820.1-ighv |(24543, 24849)|2.90586276126|(0.972,0.949,0.988)|1
VQCVEQLVESGGGLVQPGASLRLSCAASEFTFSSYDMHWVRQAPGKGLEWVSAISIGGGT
YYPDSVKGRFTISRDNAKNSLYLQMNSLRAEDTAVYYCAR
>V160RF-AQIA01075821.1-ighv |(6780, 7092)|2.27368629676|(0.987,0.991,0.654)|1
VLSQVQLQESGPGLVKPSETLSLTCAVSGGSISSGYYWGWIRQPPGKGLEWIGSIYGSGG
SNYLNPSLKSRVTLSVDTSKNQFSLKLSSVTAADTAVYYCAR
>V161RF-AQIA01075823.1-ighv |(9677, 9986)|2.99396800026|(0.998,0.996,1.000)|1
VQCEVQLVESGGGLAKPGGSLRLSCAASGFSFSDYYMYWVRQAPGKGLEWVSGISYTGGS
TYYADSVKGRFTISRENAKNTLYLQMDSLRAEDTAVYYCAR
>V162RF-AQIA01075825.1-ighv |(15487, 15796)|3.0|(1.000,1.000,1.000)|1
VQCEVQLVESGGGLVQPGGSLRLSCAASGFTFSSYWMYWVRQAPGKGLEWVSRISSDGSS
TSYADSVKGRFTISRENAKNSLYLQMNSLRAEDTAVYYCAK
>V163RF-AQIA01075825.1-ighv |(23332, 23647)|2.99798400013|(1.000,1.000,0.998)|1
VQCEVQLVESGGGLVQPGGSLRLSCAASGFTFSSSAMHWVRQASGKGLEWVGRIRSKSNN
YETGYAASVKGRFTISRDDSKNTAYLQMNSLKTEDTAVYYCTT
>V164RF-AQIA01075826.1-ighv |(7442, 7757)|2.99598000014|(0.999,0.997,1.000)|1
VQCEVQLVESGGGLVQPGGSLRLSCAASGFTFSDYYMSWVRQAPGKGPEWVGFIRNKANG
GTAEYAASVKGRFTISRDDSKSIASLQMNSLKTEDTAVYYCAR
>V165RF-AQIA01075827.1-ighv |(12747, 13054)|2.98357605748|(0.990,0.995,0.999)|1
VQCEVQLAESGGGLVQPGGSLRLSCAASGFTFSSYEMHWVRQAPGKGLESVSVIGGDSSY
THYADSVKGRFTISRDNAKNSLSLQMNSLRAEDTAVYYCA
>V166RF-AQIA01075830.1-ighv |(638, 945)|2.64553416492|(0.934,0.976,0.806)|1
AHSQVQLVQSGAEVKQPGASVKVSCKASGYTFTSYGMNWLRQAPGQRLEWMGGINTNTGN
PTYAQGFKERFTFSMDTSISTAYLQISSLKAEDTAVYYCA
>V167RF-AQIA01075832.1-ighv |(13782, 14094)|3.0|(1.000,1.000,1.000)|1
VLSQVQLQESGPGLVKPSETLSLTCAVSGGSISSGYYWSWIRQPPGKGLEWIGYIYGSSG
STYYNPSLKSRVTISKDTSKNQFSLKLSSVTAADTAVYYCAR
>V168RF-AQIA01075832.1-ighv |(26831, 27140)|3.0|(1.000,1.000,1.000)|1
VQCEVQLVESGGGLAKPGGSLRLSCAASGFTFSSYWMYWVRQAPGKGLEWISAISSGGGS
TYYADSVKGRFTISRDNSKNTLSLQMNSLRAEDTAVYYCAK
>V169RF-AQIA01075832.1-ighv |(39067, 39376)|2.99599200002|(0.998,0.999,0.999)|1
VQCDVQLVESGGGLVKPGGSLRLSCVASGFTFSSYVMHWVRQAPGKGLEWVSVISESGGT
IYYADSVKGRFTISRDNAKNSLFLQMNSLRAEDTAVYYCTR
>V170RF-AQIA01075832.1-ighv |(43031, 43343)|2.76428824207|(0.885,0.946,0.997)|1
VLSQVQLQESGPGLVKPSETLSLTCAVSGYSISSGYYWGWIRQPPGKGLEYIGYISGSSG
STYYNPSLKSRVTISKDTSKNQFSLKLSSVTAADTAVYYCAR
>V171RF-AQIA01075834.1-ighv |(701, 1011)|2.81781062361|(0.996,0.998,0.878)|1
VLSQVQLQESGPGLVKPSETLSLTCAVSGGSISSSNWWSWIRQSPGKGLEWIGGIYGSGG
STEYNPSLKSRVTISIDTSKNQFSLKLSSVTAADTAVYYCA
>V172RF-AQIA01075834.1-ighv |(15808, 16117)|3.0|(1.000,1.000,1.000)|1
VLSQVQLQESGPGLVKPSETLSLTCAVSGGSISGYYWSWIRQSPGKGLEWIGYIYGSGSS
TNYNPSLKSRVTISKDTSKNQFSLKLSSVTAADTAVYYCAR
>V173RF-AQIA01075844.1-ighv |(4662, 4971)|2.98450011724|(0.998,1.000,0.987)|1
VLSQVQLQESGPGLVKPSETLSLTCAVSGGSISSNYWSWIRQPPGKGLEWIGNIDGNTAD
TNYNPSLKSRVTISKDTSKNQFSLKLSSVTAADTAVYYCAR
>V174RF-AQIA01075848.1-ighv |(16337, 16646)|2.36525136622|(0.893,0.685,0.969)|1
AQSQVQLVQSGAEVKKPGASVKLSCKASGYTFTSYYINWVRQAPEQVLDWMGWINPSNGN
TGYAQKFQGRVTMTRDTSTSTAYMELNSLRSEDTAVYYCAR
>V175RF-AQIA01075848.1-ighv |(34897, 35206)|2.34873512519|(0.941,0.984,0.676)|1
AQSQVQLVQSGAEVKKPGASVKVSCKASGFTFGSYAISWVRQAPGQGLEWMGGIIPLVGI
TNYAEKFQGRVTITADTSTSTAYMELSSLRSEDTAVYYCAR
>V176RF-AQIA01075855.1-ighv |(3762, 4071)|2.96392188321|(0.994,1.000,0.972)|1
VLSQVQLQESGPGLVKPSETLSLTCAVSGGSISSNYWSWIRQPPGKGLEWIGYIYGSGSS
TNYNPSLKSRVTLSVDTSKNQLSLKLSSVTAADTAVYYCAR
>V177RF-AQIA01075856.1-ighv |(13880, 14195)|2.95809598554|(1.000,0.965,0.998)|1
VLSQVQLQESGPGLVKPSETLSLTCAVSGGSISGGYYYWSWIRQPPGKGLEWIGNIYGNS
ASTYYNPSLKSRVTISKDTSKNQFSLKLSSVTAADTAVYYCAR
>V178RF-AQIA01075857.1-ighv |(5233, 5548)|2.82161612351|(0.999,0.882,0.994)|1
VLSQVQLQESGPGVVKPSETLSLTCAVSGGSISSGYYYWSWIRQPPGKGLEWIGGIYSNS
ESTNYNPSLKSRVTISKDTSKNQFSLKLSSVTAADTAVYYCAR
>V179RF-AQIA01075859.1-ighv |(15555, 15867)|3.0|(1.000,1.000,1.000)|1
VLSQVQLQESGPGLVKPSETLSLTCAVSGGSISDSYWWSWIRQPPGKGLEWIGYIYGSST
STNYNPSLKSRVTISKDTSKNQFSLKLSSVTAADTAVYYCAR
>V180RF-AQIA01075860.1-ighv |(3491, 3803)|2.99799200002|(1.000,0.999,0.999)|1
VLSQVQLQESGPGLVKPSETLSLTCAVSGGSISSSNWWSWIRQPPGKGLEWIGNIGGSSG
STYYNPSLKSRVTISKDTSKNQFSLKLSSVTAADTAVYYCAR
>V181RF-AQIA01075862.1-ighv |(11827, 12136)|2.99899600001|(1.000,0.999,1.000)|1
VQCEVQLVESGGGLAKPGGSLRLSCAASGFTFSDYYMHWVRQASGKGLEWVSSISNGGGS
TWYADSVKGRFTISRENAKNTLYLQMDGLRAEDTAVYYCAR
>V182RF-AQIA01075862.1-ighv |(19656, 19971)|2.44692199709|(0.779,0.949,0.987)|1
VKCEAQLMETGGGLVQPGGSLRLSCAASGFTFSDHYMQWVRQAPGKGLEWVGLIRNKADG
ETTDYAASVKGRFTISRDDSKSITYLQMNNLKTEDTAVNYCAR
>V183RF-AQIA01075862.1-ighv |(23165, 23477)|2.85860549808|(0.935,0.999,0.941)|1
VLSQVQLQESGPGLVKPSETLSLTCAVSGGSISSSNWWSWIRQPPGKGLEWIGRISGSGG
STSYNPSLKSRVTISKDTSKNQFSLKLSSVTAADTAVYYCAR
>V184RF-AQIA01075862.1-ighv |(31521, 31830)|2.49307020361|(0.997,0.996,0.737)|1
VQCEVQLVESGGGLVQPGGSLRLSCAASGFTFSSYGMHWVCQAPGKGLEWVAVISYDGSQ
KYYADSVKDRFTISRDNSNNMLYLQMNNLKLEDTAVYYCAT
>V185RF-AQIA01075862.1-ighv |(73169, 73478)|2.61960174929|(0.996,0.929,0.824)|1
VQCEVQLVESGGGLVQPGASLRLSCAASGFTFSSTRMNWIRQAPGKRLEWVTDIKYDGSE
KYYVDSVKGRFTISRDNAKNSLYLQMNSLRAEDTAVYYCVR
>V186RF-AQIA01075862.1-ighv |(80457, 80766)|2.32042035884|(0.977,0.969,0.677)|1
VCAEVQLVQSGAEVKRPGESLRISCKTSGYSFTSSWISWVRQMPGKGLEWMGSIYPGDSD
TRYNPSFQGHVTISADKSISTTYLQWSSLKASDTATYYCAK
>V187RF-AQIA01075865.1-ighv |(14324, 14639)|3.0|(1.000,1.000,1.000)|1
VQCEVQLVESGGALAQPGGSLRLSCAASGFTFSDYYMDWVHQAPGKGLEWVGRIRNKANS
YTTEYAASVKGRFTISRDDSKNTLYLQMSSLKTEDTAVYYCAR
>V188RF-AQIA01075867.1-ighv |(12905, 13214)|2.20927656145|(0.989,0.996,0.629)|1
VQCEVQLVESGGGLAKPGGSLRLSCAASGFSFSDYYMYWVRQAPGKGLEWVSSISGSSSS
TYYPDSVKGRFTISRDNAKNTLYLQMNSPRAEDTAVYYCAR
>V189RF-AQIA01075867.1-ighv |(22147, 22453)|2.85568718425|(0.936,0.938,0.996)|1
VQCEVQLVESGGGLVQPGGSLRLSCGFTFSDHYMSWVRQAPGKGPEWVGFMRNKANGGTT
EYATSVKGRFTISRGDSKSIASLQMSSLKTEDTAVYYCAR
>V190RF-AQIA01075868.1-ighv |(2740, 3049)|2.99396800026|(0.998,0.996,1.000)|1
VQCEVKLVESGGGLVQPGGSLRLSCAASGFTFSNYWMFWVRQAPGKGLEWVSSISGSSSS
TYYPDSVKGRFTISRDNAKNTLYLQMNSLRAEDTAVYYCAR
>V191RF-AQIA01075868.1-ighv |(14808, 15114)|2.38479537635|(0.995,0.720,0.942)|1
VQCEVQLVESGGGLVQPGGSLRLSCAASGFTSGNSDLIWIRQAPGKGLEWVSYISSGGSI
YYSDSVKGRFTISRDNAKNTLYLQMSSLRVEDTAVYYCAK
>V192RF-AQIA01075871.1-ighv |(1079, 1388)|2.91370752475|(0.956,0.978,0.985)|1
VQCEVQLVESGGGLVQPGGSLRLSCAASGFTFSNAWMNWVRQAPGKGLVWVARIKSKANG
ETADYAASVKGRFTISRDDSKNTLYLQMNSLKTEDTAVYYC
>V193RF-AQIA01007908.1-igkv |(8863, 9163)|2.99593600205|(1.000,1.000,0.996)|-1
ARCDIQMTQSPSSQSASVGDRVTITCQASQSLSNYLNWYQQKPGKIPKLLIYRASSLQSG
IPSRFSGSGSGTDFTLTISSLQPEDFATYYCQQGYSYP
>V194RF-AQIA01017094.1-igkv |(128027, 128344)|1.86140854429|(0.874,0.514,0.878)|-1
TSGAIPLTQTPLSLPVTPGEPASISCRSSQSLLHSNGNTYLHWYLQKPGQSPQLLIYEVS
NRASGVPERFSGSGSDTDFTLKINLVEAEDVGVYYCMQTTQCPP
>V195RF-AQIA01017094.1-igkv |(132911, 133229)|2.46953900268|(0.990,0.759,0.928)|-1
STGDIVMTQTPLSLPVTLGEPASISCRSSQSLLDSEDGNTYLDWYLQKPGQSPQLLIYEV
SNRASGVPDRFSGSGSDTDFTLKISRVEAEDVGVYYCMQGIEYP
>V196RF-AQIA01017118.1-igkv |(14570, 14870)|3.0|(1.000,1.000,1.000)|-1
ARCDIQMTQSPSSLSASVGDRVTITCRASQGINNYLSWYQQKPGKAPKPLIYYASSLETG
VPSRFSGSGSGTDYTLTISSLQPEDIATYYCQQYNNSP
>V197RF-AQIA01017118.1-igkv |(20337, 20639)|2.75990155173|(0.954,0.909,0.912)|-1
SSGDVVMTQSPLSLPITPGQPASISCRSSQSLVHSDGKTYLNWLQQKPGQPPRRLIYQVS
NRDSGVPDRFSGSGAGTDFTLKISRVEAEDVGVYYCMQG
>V198RF-AQIA01017118.1-igkv |(36827, 37129)|2.53887155123|(0.957,0.924,0.780)|-1
SSGDVVMTQSPLSLPITPGQPASISCRSSQSLVHSNGNTYLSWYQQKPGQPPRLLIYQVS
NRDSGVPDRFSGSGAGTDFTLKISRVEAEDVGVYYCGQG
>V199RF-AQIA01017118.1-igkv |(47001, 47316)|2.68555669193|(0.966,0.870,0.902)|-1
SGGDIVMTQTPLSLPVTPGEPASISCRSSQSLLHTDGYTYLDWYLQKPGQSPQLLIYGGS
NRASGVPDRFSGSGSGTDFTLKISKVEAEDVGVYYCMQHKALP
>V200RF-AQIA01017118.1-igkv |(71244, 71559)|2.54247290845|(0.995,0.760,0.986)|-1
SSGDIVMTQTPLSLPVTLGEPASISCRSSQSLLSSNGYNYLNWYLQKPGQSPQLLIYYGS
NRASGVPDRFSGSGSGTDFTLKISRVEAEDVGVYYCMQALQTP
>V201RF-AQIA01017118.1-igkv |(79515, 79815)|2.60545693591|(0.983,0.995,0.780)|-1
TRCAIQMTQSPSSLSASVGDTVTITCRASQSIGSNLAWYQQKPGKVPKLLIYAASTLQSE
VPSRFSGSGSGTDFTLTISSLQPEEVATYYCQKCDSAP
>V202RF-AQIA01017118.1-igkv |(115261, 115563)|2.51268301452|(0.948,0.829,0.838)|-1
STGDVVMTQSPLSLPVTLGQPASISCRSSQSLLHSNGNTYLSWFQQKPGQSPRRLIYKVS
NRDSGVPDRFSGSGAGTDFTLKISRVEAEDVGVYYCMEG
>V203RF-AQIA01017118.1-igkv |(131697, 131995)|2.84985426687|(0.999,0.894,1.000)|-1
SKGEIVLTQSPAFQSVTLKEKVTITCQASQSIGSSLHWYQQKPDQSPKLLIKYASQSISG
VPSRFSGSGSGTDFTLTINSLEAEDAATYYCQQSSSF
>V204RF-AQIA01017118.1-igkv |(160930, 161230)|2.91395691076|(0.993,0.938,0.995)|-1
TTGQVVLTQSPATLSLSPGERATLSCRASQSVSSSLAWYQQKPGQAPRLLIYGASSRATG
IPDRFSGSGSGTEFTLTISSLEPEDFAVYYCQKYSSSP
>V205RF-AQIA01017118.1-igkv |(166412, 166712)|2.9859000027|(0.995,0.999,0.992)|-1
VRCDIQMTQAPSFLSASVGDRVTITCQASQSISNDLAWYQQKPGKSPTLLIYDATNLHTG
VPSRFSGSGSGADYSLTISSLELEDFAAYYCQQEYSYP
>V206RF-AQIA01017120.1-igkv |(6524, 6816)|2.88136248136|(0.995,0.913,1.000)|-1
SRGDIVMTQSPAFVSVTPGEKVTITCQASEGISNYLHWYQQKPDQAPKLFIQYASQSISG
VPSRFTGSGSGTDFTFTISSLEVEDAATYYCQQGN
>V207RF-AQIA01017120.1-igkv |(22790, 23081)|2.98688400513|(0.998,0.996,0.993)|-1
DIQMTQSPSSLSASVGDTVTITCRASQSFSSSLAWYQQKPGKAPKLLIYSASSLQSGVPS
RFSGSKSGTDFTLTISSLQPEDIASYYCQQYYSYP
>V208RF-AQIA01017120.1-igkv |(38344, 38636)|3.0|(1.000,1.000,1.000)|-1
AKCDIQMTQSPSSLSASVGDRVTITCRASQTISSYLAWYQQKPGKVPKLLIYAASSLESG
VPSRFSGSGSGTEFTLTISSLQPEDFATYYCQQHN
>V209RF-AQIA01017120.1-igkv |(57654, 57954)|2.96516337871|(1.000,1.000,0.969)|-1
ARCDIQMTQSPSSLSASVGDRVTITCRASQGISTYLNWYQQKPGKAPKLLIYAASSLQSG
VPSRFSGSGSGTEFTLTISSLQPEDFATYYCLQYNSKP
>V210RF-AQIA01017120.1-igkv |(72400, 72698)|2.99083600705|(1.000,0.995,0.996)|-1
TTGEIVMTQSPATLSLSPGERATLSCRASQSVSSSLAWYQQKPGQAPRLLIYGASSRATG
IPDRFSGSGSGTEFTLTISSLEPEDFAVYYCQQYSNW
>V211RF-AQIA01017120.1-igkv |(84992, 85292)|2.96563765192|(0.999,1.000,0.970)|-1
ARCDIQMTQSPSSLSASVGDRVTITCRASQGISNYLNWYQQKPGKAPKLLIYAASSLQSG
VPSRFSGSGSGTEFTLTISSLQPEDFATYYCQPFKNYL
>V212RF-AQIA01017122.1-igkv |(11076, 11376)|2.14320742631|(0.686,0.942,0.782)|-1
TAGEIVMTQSPATLSLSPGETATLSCRASQSVGSYLAWYQQKPGQAPKLLVHSAYFRATG
IPDRFSGSGSRTEFTLTISSLEPEDVGVYHCQQYNDLL
>V213RF-AQIA01017123.1-igkv |(8475, 8775)|3.0|(1.000,1.000,1.000)|-1
ARCDIQLTQSPSSLSASVGDRVTITCRASQGISSYLAWYQQKPGKAPKLLIYKASTLQSG
VPSRFSGSGSGTDFTLTISSLQPEDFAVYYCQQRNSYP
>V214RF-AQIA01017123.1-igkv |(15101, 15401)|2.99899600001|(1.000,0.999,1.000)|-1
AKCDIQMTQSPSSLSASVGDRVTITCRASQGISSYLAWYQQKPGKAPKPLIYYASNLESG
VPSRFSGSGSGTEFTLTISSLQPEDFATYYCQQYNSDP
>V215RF-AQIA01017123.1-igkv |(32082, 32382)|2.95624064902|(1.000,1.000,0.962)|-1
ARCDIQMTQSPSSLSASVGDRVTITCRASQGISNYLSWYQQKPGKAPKLLIYAASSLQSG
VPSRFSGSGSGTEFTLTISSLQPEDFATYYCLQGYSTP
>V216RF-AQIA01017123.1-igkv |(42629, 42935)|2.97834411275|(0.999,0.991,0.989)|-1
TVMTQSPATLSLSPGERATLSCRASQSVSSSLAWYQQKPGQAPRLLIYYASSRATGIPDR
FSGSGSGTEFTLTISSTLTISSLDPEDVGVYYCQKYNDWP
>V217RF-AQIA01017125.1-igkv |(705, 1005)|3.0|(1.000,1.000,1.000)|-1
ARCDIQLTQSPSSLSASVGDRVTITCRASQGISSYLAWYQQKPGKAPKLLIYAASNLQSG
VPSRFSGSGSGTDFTLTISSLQPEDFAVYYCQQRNSYP
>V218RF-AQIA01017126.1-igkv |(2367, 2667)|2.99496000066|(0.999,1.000,0.996)|-1
ARCDIQMTQSPSSLSASVGDRVTITCRASQGISSYLNWYQQKPGKAPKLLIYYANSLASG
VPSRFSGSGSGTDYTLTISSLQPEDFATYYCQQGNSNP
>V219RF-AQIA01017126.1-igkv |(20855, 21155)|2.98394800078|(0.995,0.992,0.997)|-1
TTGEIVMTQSPATLSLSPGETATISCRTSQSVSSYLAWYQQKPGQAPRLLIYGASSRATG
IPDRFSGSGSGTDFTLTISSLEPEDFAVYYCQETSNLS
>V220RF-AQIA01017128.1-igkv |(28886, 29186)|2.98885201038|(0.998,0.992,0.999)|-1
ARCDIQMTQSPSSLSASVGDTVTITCRASQGISSYLNWFQQKPGKAPKLLIYAASSLESG
VPSRFSGSGSGTEFTLTISSLQPEDFATYYCLQYNSYP
>V221RF-AQIA01017128.1-igkv |(35341, 35641)|2.43333984209|(0.920,1.000,0.706)|-1
ARCDIQMTQSPSSLSASVGDRVTITCQASQGISSWLAWYQQKPGKAPKLLLYKAPGLQSG
VPSMFSGSGSGTEFTLTISSLQPEYFATYYCQQFSSAL
>V222RF-AQIA01017128.1-igkv |(51771, 52071)|2.98064403777|(0.998,0.990,0.993)|-1
TTGEIVMTQSPATLSLSPGERATLSCRASQSVSSRLAWYQQKPGQAPRLLIYGASSRATG
IPDRFSGSGSGTEFTLTISSLEPEDVGVYYCQQDYSWP
>V223RF-AQIA01017128.1-igkv |(94686, 94986)|3.0|(1.000,1.000,1.000)|-1
ARCDIQMTQSPSSLSASVGDRVTITCRASQGISSYLAWYQQKPGKAPKLLIYDASNLQSG
VPSRFSGSGSGTDFTLTISSLQPEDFATYYCQQHNSYP
>V224RF-AQIA01017128.1-igkv |(113498, 113796)|2.92982233718|(0.996,0.995,0.948)|-1
TTGEIVMTQSPATLSLSPGERATLSCRASQSVSSSLAWYQQKPGQAPRLLIYGASSRATG
IPDRFSGSGSGTDFTLTISSLEPEDVAVYYCLQRSNW
>V225RF-AQIA01017130.1-igkv |(1559, 1859)|2.99280401921|(1.000,1.000,0.993)|-1
ARCDIQMTQSPSSLSASVGDKVTITCHASQGISSWLAWYQQKPGKAPKPLIYKASSLQSG
VPSRFSGSGSGTDYTLTISSLQPEDFATYYCQQYDNLP
>V226RF-AQIA01017133.1-igkv |(667, 967)|3.0|(1.000,1.000,1.000)|-1
ARCDIQMTQSPSSLSASVGDKVTITCHASQGISSWLAWYQQKPGKAPKPLIYKASSLQSG
VPSRFSGSGSGTDFTLTISSLQPEDFATYYCQQYSSYP
>V227RF-AQIA01017135.1-igkv |(10903, 11203)|3.0|(1.000,1.000,1.000)|-1
AKCDIQMTQSPSSLSASVGDKVTITCQASQSISSWLAWYQQKPGKAPKPLIYKASSLESG
VPSRFSGSGSGTDFTLTISSLQPEDFATYYCQQHNSYP
>V228RF-AQIA01017135.1-igkv |(26554, 26853)|2.9022366056|(0.984,0.952,0.971)|-1
TTGETVMTQSPATLSLSPGERATLSCRASQSVGSTLAWYQQKPGQAPRLLIYGASSRATG
IPDRFSGSGSGTEFTLTISSLEPEDVGVYYCQQESNWK
>V229RF-AQIA01017139.1-igkv |(38517, 38829)|2.94253608204|(0.979,0.989,0.975)|-1
CNGDIVLTQSPASLAVSPGQRATITCRASESVSFFGINLIHWYQQKPGQPPKLLIYQASN
KDTGVPARFSGSGSGTDFTLTINPVEADDAADYYCLQSKNSP
>V230RF-AQIA01017139.1-igkv |(56358, 56649)|2.59746889698|(0.982,0.979,0.783)|-1
IVLTQSPTSMAVSQGERVTISCTASSSVSTSYLHWYQQKPGFPPRLLVYRTSSLASGVPA
RFSGSGSGTSYTLTISSMEAEDAANYYCQQAHSIP
>V231RF-AQIA01064169.1-trdv |(156383, 156689)|2.06360534983|(0.719,0.670,0.688)|-1
RGMLCDKVTQSSPDQMVASGSEVVLLCTYDSTYSDPGLFWYRIRPDYNFQFVFYGDKSRS
HGSYFAKGRFSVKHLLTQKAFHLVISPVSTEDSATYYCAM
>V232RF-AQIA01066360.1-ighv |(8136, 8449)|2.95291847018|(1.000,0.998,0.961)|-1
VQCEVQLVESGGGLVQPGGSLRLSCAASGFTFSNYYMHWVRQAQGKGLEWVGLIRNKANS
YTTEYAAAVKGRFTISRDDSKNTLYLQMSSLKTEDTALYYCT
>V233RF-AQIA01066360.1-ighv |(18228, 18531)|2.19850170622|(0.986,0.625,0.994)|-1
VQCEVQLAESGGGLVQPGRSLRPSCAASGFTFSSYGMHWVRQAPEEGLEWVSYIGSSTMY
YADSVKGRFTISRDNAKNSLYLQMNSLRAEDTAVYYCVR
>V234RF-AQIA01066360.1-ighv |(57288, 57597)|2.84292729297|(0.939,0.924,0.992)|-1
VQCEVQLVESGGGLVQPGGSLRLSCTGSGFTFSSYYMYWIRQAPGKGLQWVSAINTGGGS
TWYTDSVKGRFTISKENAKNTLYLQMDSLRAEDTAVYYCAK
>V235RF-AQIA01066362.1-ighv |(1746, 2054)|2.55361849465|(0.950,0.869,0.823)|-1
VQGEVQLVESEGNFVQPGGSLRLSCAASGFTFSSCDLDWIRHAPGKGLEWVSGISIAGST
YYANSVKGRFAISRGNAKNTLYLQMYSLIAEDTAIYYCVSE
>V236RF-AQIA01066362.1-ighv |(12791, 13106)|3.0|(1.000,1.000,1.000)|-1
VQCEVQLVESGGGLVQPGGSLRLSCAASGFTFSNYWMSWVRQAPGKGLEWVGFIKNKADG
GTAAYAESVKGRFTISRDDSKNTLYLQMNSLKTEDTAVYYCTR
>V237RF-AQIA01066366.1-ighv |(294, 607)|2.99798400013|(1.000,1.000,0.998)|-1
VQCEVQLVESGGGLVQPGGSLRLSCAASGFTFSNYWMSWVRQAPGKGLEWVGFIKNKADG
GTADYAASVKGRFTISRDDSKNTLYLQMSSLKTEDTAVYYCT
>V238RF-AQIA01066369.1-ighv |(10385, 10694)|2.59002101344|(0.975,0.986,0.776)|-1
VCAEVQLVQSGAEVKRPGESLKISCKTSGYSFTSYWISWVRQMPGKGLEWMGAIDPSDSD
TRYSPSFQGQVTISADKSISTAYLQWSSLKASDSATYYCAK
>V239RF-AQIA01066369.1-ighv |(30516, 30824)|2.55361849465|(0.950,0.869,0.823)|-1
VQGEVQLVESEGNFVQPGGSLRLSCAASGFTFSSCDLDWIRHAPGKGLEWVSGISIAGST
YYANSVKGRFAISRGNAKNTLYLQMYSLIAEDTAIYYCVSE
>V240RF-AQIA01066378.1-ighv |(784, 1093)|2.72124386056|(0.990,0.834,0.990)|-1
VQGEVQLVESGGGLAKPGGSLRLSCAASGFTFSSYWMHWVRQAPGKGLEWISAINSAGSS
TYYADSVKGRFTISRENAKNTLYLQMDGLRAEDTAVYYCAG
>V241RF-AQIA01066385.1-ighv |(742, 1051)|2.54961786933|(0.943,0.952,0.769)|-1
AHSEVQLVQSGAELKKPGASVKVSCKVSGYTFTELSMHWVRQVPGKGLEWMGGVDPVYGE
IIHAEKFQGRVTMTEDTSTDTAYMELSSLRSEDTAVYYCAR
>V242RF-AQIA01066385.1-ighv |(14117, 14432)|3.0|(1.000,1.000,1.000)|-1
VQCEVQLVESGGGLVQPGGSLRLSCAASGFTFSDYAMDWVRQAPGKGLEWVGFIRSKAYG
GTAEYAASVKGRFTISRDDSKNTAYLQMSSLKTEDTAVYYCTR
>V243RF-AQIA01066387.1-ighv |(6564, 6873)|2.99596000066|(1.000,0.999,0.997)|-1
VQCEVQLVESGGGLVQPGGSLRLSCAASGFTFGDYGMHWVRQAPGKGLEWVSSISNTGKT
IYYADSVKGRFTVSRDNAKNSLSLQMSSLRAEDTAVYYCTR
>V244RF-AQIA01066387.1-ighv |(11668, 11974)|3.0|(1.000,1.000,1.000)|-1
VQCEVQLVESGGGLVQPGGSLRLSCAASGFTFSSYGMSWVRQAPGKGLEWVSAISSGGST
YYADSVKGRFTISRDNSKNTLSLQMNSLRAEDTAVYYCAK
>V245RF-AQIA01066387.1-ighv |(59837, 60146)|2.73855123877|(0.935,0.983,0.855)|-1
AHSQVQLVQSGAEIKQPGASVKLSCKASGYTFTSYYMHWVRQAPGQGLEWIGLISPYNGN
KGYAQNFQGRVTITTDTSTSTGYMELSSLRSEDTAVYYCTR
>V246RF-AQIA01066387.1-ighv |(66519, 66828)|2.99899600001|(1.000,1.000,0.999)|-1
VQCEVQLVESGGGLAKPGGSLRLSCAASGFTFSDYYMDWVRQAPGKGLEWVSRISNGGGS
TWYADSVKGRFTISRENAKNTLYLQMNSLRAEDTAVYYCAR
>V247RF-AQIA01066387.1-ighv |(87163, 87466)|2.95304987297|(0.993,0.991,0.971)|-1
VQCEVQLAESGGGLVQPGGSLRLSCAASGFTISSYWMSWVCQAPGKGLEWLSDIYGSTMY
YGDSVKGLFTVSRDNAKNSLYLQMNSLRAEDTAVYYCTR
>V248RF-AQIA01066387.1-ighv |(93938, 94252)|2.39634203397|(0.962,0.711,0.947)|-1
VLSQVTLKESGPALVKPTQTLTLTCTFSGFSLTTSGMGVGWIRQPPGKALEWLASIYWDD
DKYYSTSLKSRLTISKDTSKNQVVLTMTNMDPVDTATYYCARR
>V249RF-AQIA01066387.1-ighv |(108611, 108920)|2.98150011724|(0.997,0.986,0.999)|-1
VLSQLQLQESGPGLVKPSETLSLTCAVSGGSISSNYWSWIRQPPGKGLEWIGRISGSGGS
TDYNPSLKSRVTISTDTSKNQFSLKLSSVTAADTAVYYCAR
>V250RF-AQIA01066395.1-ighv |(6190, 6505)|2.76236992409|(0.963,0.899,0.923)|-1
VQCEVQLVESGGGLVQPGGSLRPSCAASGFTFSSSAMHWVRQASGKGLEWVGRIRSKSNN
YATEYAASVKGRFTISRDDSKNTACLQMSSLKTEDTAVYYCAR
>V251RF-AQIA01066395.1-ighv |(16120, 16435)|2.99396400065|(0.999,0.996,0.999)|-1
VQCEVQLVESGGGLVQPGGSLRLSCAASGFTFSDHYMFWVRQAPGKGLEWVGFIRSKAYG
GTAEYAASVKGRFTISRDDSKSIAYLQMSSLKTEDTAVYYCTR
>V252RF-AQIA01066397.1-ighv |(6540, 6849)|2.71110054947|(0.974,0.922,0.869)|-1
AHSQVQLVQSGPEVKQPGASVKVSCKASGYSFTTYGMNWVRQAPGQGLEWMGWMNTYTGN
PTYAQGFTERFVFSMDTSVSTVYLQISSLKGEDTAVYYCAR
>V253RF-AQIA01066397.1-ighv |(62192, 62507)|2.99798400013|(1.000,0.998,1.000)|-1
VQCEVQLVESGGGLVQPGGSLRLSCAASGFTFSNHYMYWVRQAPGKGLEWVGFIRSKAYG
GTAEYAASVKGRFTISRDDSKNTAYLQMSSLKTEDTAVYYCTR
>V254RF-AQIA01073275.1-ighv |(1217, 1526)|2.8379146159|(0.990,0.959,0.915)|-1
DHSEVQLVQSGAEVKKPGASVKISCKASGYTFTDYYLHWVRQAPGKGLEWMGRVDPEDGE
ADYAQKFQDRVTITADTSTDTAYMELSSLRSEDTAVYYCAT
>V255RF-AQIA01073275.1-ighv |(9357, 9667)|2.99280401921|(1.000,1.000,0.993)|-1
VQCEVQLVESGGGLVQPGGSLRLSCVASGFTFSDHYMDWVRQAPGKGLEWVSSISTGSGS
TTLYPDSVKGRFTISRDNAKNTVYLQMNSLRAEDTAVYYCA
>V256RF-AQIA01075132.1-igkv |(288, 575)|2.98021230726|(0.998,0.984,0.999)|-1
TVMTQSPATLSLSPGERATLSCRASQSVGSNLAWYQQKPGQAPRLLIYDASSRATGIPDR
FSGSGSGTEFTLTISSLEPEDVGVYYCQQYNNWN
>V0RF-ABDC01047890.1-ighv |(234, 540)|2.72163012727|(0.892,0.893,0.950)|1
VQCNVQLVESGGGLVQPGGSLTLSCAASRFTFSSYAMSWFRQAPGKGMEWVALIRNDGST
YYADAVKSEFTISRDNAKNKLYLQMNSLRAEDTALYYCAR
>V1RF-ABDC01116809.1-trbv |(1528, 1849)|1.88638310392|(0.732,0.874,0.521)|1
QVTQIPRYLITETGKKVTVTCSQNMNHEYMFWYRQDPGQGLKLVYYSVNVGFVTEGDVSE
GYTASRTERPSFPLNVESARASQTALHLCASSLYSLHSAAQPAAF
>V2RF-ABDC01116809.1-trbv |(7343, 7638)|2.37633352287|(0.825,0.819,0.753)|1
LVDAEVTQTPGHLIKRTGEKVLLECSQDMDHERMFWYRQDPGLGLRLIYFSFDVGSEEKG
DVWEAYSASRKQKDRFPLVLESAGTNQTSVYLCASR
>V3RF-ABDC01165520.1-igkv |(7469, 7769)|2.98482001102|(0.992,0.998,0.995)|1
ARCDIQMTQSPSSLAASVGDTVTISCRASQGISSWLSWHQQKPGKPPKTLINKASNLESG
VPSRFSGSGSGTDFTLTIKGLQPEDFATYYCQQYDSSP
>V4RF-ABDC01231268.1-ighv |(5361, 5667)|2.99393200206|(0.999,0.995,1.000)|1
VQCDVQLLESGGGLVQPGGSLRLSCAASGFTFSSYYMHWVRQAPGKGLEWVSTISSGGST
YYADAVKGRFTISRDNGKSSLYLQMNSLKAEDTAVYYCAR
>V5RF-ABDC01231269.1-ighv |(3071, 3380)|1.96238333733|(0.974,0.975,0.541)|1
AHSEVQLVQSGAEVKPPGASVKVSCKASGYTFTSYYMHWVRQAPGQGLEWEGRINPSSGE
TNYAQKFQGRVTMTRDTSTSTAYMELSSLRPEDTAVYYCAR
>V6RF-ABDC01231272.1-ighv |(378, 697)|2.97478801933|(0.990,0.997,0.988)|1
VQCEVQLVESGGGLVQPGGSLRLSCVASGFTLTSYGMNWVRQAPGKGLEWISYIYSSSTS
YADSVKGRFTISTDNGKNSLYLQMNSLRAEDTAMYYCARHTVRG
>V7RF-ABDC01231274.1-ighv |(17, 332)|2.99289600501|(0.999,1.000,0.994)|1
VQCEVQLVESGGGLAQPGGSLRLSCAASGFTFSSYYMYWVRQAPGKGLEWVGFVRNKANG
GTAEYAASVKGRFTISRDDSKSTAYLQMNSLRAEDTALYYCAR
>V8RF-ABDC01231277.1-ighv |(694, 1003)|2.99599600001|(0.999,0.998,0.999)|1
VQCEVQLAESGGGLVQPGGSLRLSCAASGFTFSNYYMYWVRQAPGKGLEWISTISNSGSS
TGYADSVKGRFTTSRDNSKNMLYLQMNSLKAEDTALYYCAR
>V9RF-ABDC01282056.1-ighv |(476, 782)|2.98432022844|(0.999,1.000,0.986)|1
VQCEVQLVESGGGLVQPGGSLKLSCAASGFTFSSYDMHWVRQAPGKGLEWVSVIGIGGST
YYADAMKGRFTISRDNGKNMLYLQMSSVQAEDTAVYYCTR
>V10RF-ABDC01282057.1-ighv |(6536, 6858)|2.98758408012|(1.000,0.998,0.990)|1
VQCEVQLVESGGGLVQPGGSLRLSCAASGFTFSSYWMYWVRQAPGKGLEWVSRINPDGGS
TNYADAVKGRFTISRDNGKNTLYLQMNSLKAEDTAVYYCARDTVT
>V11RF-ABDC01282063.1-ighv |(1659, 1962)|2.5077415433|(0.947,0.743,0.974)|1
VQCEEQLVESGGGLVQPGGSLRLSCAASGFSFDDYVMHWIRQAPGKGLEWISYIYSSSTS
YADSVKGRFTISSDNGKNMLYLQMNSLRAEDTAMYYCAR
>V12RF-ABDC01282065.1-ighv |(718, 1027)|2.89718600389|(0.950,0.999,0.958)|1
VQCEVQLVESGGGLVPPGGSLRLSCAASGFTFSDYWMSWIRQAPGKGLEWVGEINGDGGN
TNYADAMKGRFTISRDNSKNTLYLQMNSLRAKDTAVYYCGR
>V13RF-ABDC01296165.1-iglv |(3112, 3422)|2.25309345638|(0.810,0.781,0.707)|1
SLSQPVVTQPPSLSASPGASARLTCTLSSGFSVGSYAISWHQQKPGSPPRYLLYYHTDSN
KHQGSGVPSRFSGSKDASANAGILHVSGLQPEDEADYYCAV
>V14RF-ABDC01296165.1-iglv |(8050, 8360)|2.99194800078|(0.999,0.997,0.996)|1
SLANFVLTQPSSVSGSPGQKVTISCTRSSGNIGSNYVHWYQQRPGSAPTTVIYRDDKRPS
GVPDRFSGSSDSSSNSASLTISGLQSEDEADYYCQSYDASA
>V15RF-ABDC01296166.1-iglv |(4596, 4906)|2.29628256162|(0.816,0.781,0.732)|1
SLSQPVVTQPPSLSASPGASARLTCTLSSGFSVGSYAISWHQQKPGSPPRYLLYYHTDSD
KHQGSGVPSRFSGSKDASANAGILHVSGLQPEDEADYYCAV
>V16RF-ABDC01296168.1-igkv |(909, 1222)|2.07685382009|(0.690,0.642,0.810)|1
SLSQPVLTQPPSASASPGASAKLTCTLSSGYSNYGIAWHQQHPEKSPRYLMYVYSDGSQS
KGDGIPDRFSGSSSGADRYLTISNVQPEDEADYYCQTWDGGV
>V17RF-ABDC01314388.1-ighv |(6282, 6597)|2.94289528658|(0.964,1.000,0.986)|1
VQCEVQLVESGGGLVQPGGSLKLSCAASGLTFSDYWMSWIRQAPGKGLEWAGLNRSKAYG
GIAEYAASVKDRFTISRDDSKSTAYLQMNSLKAKDTALYYCVR
>V18RF-ABDC01318810.1-iglv |(15156, 15463)|2.95130128432|(0.976,0.996,0.981)|1
SWAQSALTQPPSVSGAPGETVTISCSGSSSNIGGYDANWYQQLPGTAPKLLIYGNSNRPS
GVPARFSGSKSGSSASLTIAGLQAEDEGDYYCSSWDSSLS
>V19RF-ABDC01318812.1-iglv |(1658, 1965)|2.14641674493|(0.991,0.710,0.823)|1
SWAQSALTQPPSVSGAPGQSVTISCLGSNSNIGGNYANWYQQLPGTAPKTLIYANSNRPS
GVPARFSGSKSGSSASLTITELQAEDEADYYCSAWDDSLS
>V20RF-ABDC01339850.1-iglv |(5825, 6125)|1.95484340319|(0.643,0.949,0.681)|1
SVASQLTQVPAVSVALGQTASITCQGDGIRSYYANWYQQKPGQAPVLLIYSDNNRPSGIP
ERSSGSNSGNMATLTMNRAQADDEGDYHCQSFDSRGTL
>V21RF-ABDC01342328.1-iglv |(12642, 12952)|2.89516605151|(0.982,0.993,0.931)|1
SLANFFLTQPSSVSGSPGQKVTISCTRSSGNIGSNYVHWYQQRPGSAPSTVIYEYNKRPS
GVPDRFSGSMDSSSNSASLTISGLQSEDEADYYCQSYDGSY
>V22RF-ABDC01347843.1-iglv |(8431, 8731)|2.55214477431|(0.854,0.825,0.879)|1
SVASQPNQVPAVSVALGQTASITCQGDGLRSYYPGWYQQKPGQAPVLVFYGNNKRPSGIP
ERFSGSKSGNTAMLTISGAQADDEADYYCQTWDSTGTH
>V23RF-ABDC01347844.1-iglv |(5493, 5791)|2.29906943977|(0.923,0.656,0.982)|1
SVASQLTQVPAVSVALGQTARITCQGDSLRSYYANWYQQKPGQAPVLLIYGDNQRPSGIP
ERFSGSKSGNTATLTVSGAQVEDEADYYCGSYAGSGT
>V24RF-ABDC01349227.1-iglv |(6289, 6580)|2.86117027154|(0.979,0.958,0.934)|1
SVASQVTQVPAVSVALGQTARITCQGDSLSSYYPGWYQQKPSQAPVLVVYGNNERPSGIP
ERFSGSKSGNTATLTISGAQVEDEADYYCGSYAGS
>V25RF-ABDC01349230.1-iglv |(865, 1165)|2.97476801985|(0.995,0.988,0.992)|1
SVASQLTQVPAVSVALGQTASITCQGDGLSSDYANWYQQKPGQAPVLLIYGENQRPSGIP
ERFSSSDSGDTATLTISGAQAGDEADYYCQVWDSENNK
>V26RF-ABDC01351831.1-igkv |(554, 852)|2.51587811308|(0.796,0.952,0.926)|1
TRCDIQVTQSPSSVSASPGDTVTISCRASQDISNRLSWYQQKPGKPPKALIYVASNLHSG
VSSRFSGSGSGTDYSLTIRGLETDDAATYFCRQYKIN
>V27RF-ABDC01351832.1-igkv |(2497, 2812)|2.43369987461|(0.983,0.727,0.957)|1
SSGDVVMTQTPVSLPVTPGEPASISCRSSQSLLHSDGKTYLYWYLQKPGQSPQLLIYLGF
TRASGVPDRFSGSGSGTDFTLKISKVEAEDVGVYYCMQAIQPP
>V28RF-ABDC01351835.1-igkv |(461, 776)|2.49644579259|(0.991,0.737,0.996)|1
SNGEIVMTQTPLSLPVTPGEPASISCRSSQSLLHSDGNTYLHWYLQKPGQSPQLLIYRVS
NRFSGVPDRFSGSGSGTDFTLKISRVEAEDVGVYYCMQGTQTP
>V29RF-ABDC01351837.1-igkv |(5117, 5415)|2.51537253402|(0.797,0.925,0.893)|1
TRCDIQVTQSPSSMSVSPGDTVTISCRASQDISNRLSWYQQKPGKPPKPLIYVASNLHSG
VSSRFSGSGSGTDYSLTIRSLETDDAATYFCRQYKNN
>V30RF-ABDC01351837.1-igkv |(9264, 9579)|2.90428330382|(0.951,0.980,0.980)|1
SSGDVVMTQTPLSLSVTPGESASISCRASQSIQDSDGNTYLNWFLQKPGQPPRRLIHKVS
NRDSGVSDGFSGSGSGTDFTLKISRVEAEDVGVYYCMQASYFP
>V31RF-ABDC01352111.1-iglv |(14382, 14693)|1.93720514109|(0.973,0.568,0.899)|1
SWAQSALTQPPSVSGAPGQSVTISCLGSSSNIGGGYVVHWYQQLPGTAPKLLIYGGSGRP
SGVPARFSGSKSGSSASLTIAGLQAKDEADYYCQSYDSSLDA
>V32RF-ABDC01352115.1-iglv |(760, 1076)|2.10116953307|(0.907,0.599,0.911)|1
SLSQPVLTQPPSASASPGASAKLTCTLSSGHSNYGITWHQQQPGKAPRYLMYVYSDGSQS
KGDGVPDRFSGSSSGADRYLTISNVQPEDEADYYCQTADSSGV
>V33RF-ABDC01359388.1-iglv |(1496, 1806)|2.98097252412|(0.999,0.983,1.000)|1
SLANFVLTQPSSVSGSPGQKVTVSCTRSSGNIGSNYVYWYQQRPGSAPTTVIYRDDQRPS
GVPDRFSGSIDSSSNSASLTISGLQSEDEADYYCQSYDGSA
>V34RF-ABDC01360510.1-igkv |(1890, 2205)|2.4143020186|(0.870,0.855,0.748)|1
SSGDIVMTQTPLSLPVTPGEPASISCRSSQSLLHSNGNTYLQWYLQKPGQSPQPLIYRVS
NRFSGVPDRFSGSGAGTDFTLKISRVEAADVGVYYCMQGIQFP
>V35RF-ABDC01360510.1-igkv |(9535, 9833)|2.23067499519|(0.720,0.921,0.987)|1
IRCDIQMTQSPSSLAASPGETVTISCRASQGINRNLAWYQHKPGNAPKRLIYGASNLQSG
VSSRFSGSGSGTDYSLTIRGLETDDVATYFCHQYNSN
>V36RF-ABDC01360510.1-igkv |(13925, 14240)|2.38277227985|(0.978,0.705,0.959)|1
SRGDIVMTQTPVSLPVTPGEPASISCRSSQSLLHSNGKTYLQWFLQKPGQSPQLLIYLGF
TRASGVPDRFSGSGSGTDFTLKISKVEAEDVGVYYCMQTIQLP
>V37RF-ABDC01360666.1-igkv |(4785, 5100)|2.92858870068|(0.985,0.968,0.977)|1
SSGDIVMTQTPLSLPVTPGESASISCRSSQSLLHSDGKTYLQWFLQKPGQSPQLLIYLGF
TRASGVPDRFSGSGSGTDFTLKISKVEAEDVGVYYCMQTIQFP
>V38RF-ABDC01360670.1-igkv |(1063, 1378)|2.03529411839|(0.867,0.608,0.809)|1
SSGDIVMTQTPLSLPVTPGEPASISCRASESLLDSDGKTYLYWFLQKPGQPPRRLIYQVS
NRDSGVSDRFSGSGSGTDFTLKISRVEAEDVGVYYCAQATKLP
>V39RF-ABDC01363519.1-trav |(2177, 2465)|1.83353001165|(0.642,0.636,0.574)|1
SLSLAKTTQPIAMESYEGQEVNIPCSHTDIATSETIFWYQQFPNQGPRFIIQGYKTNVTN
EVASLFIPADRKSSTLSLSRAALSDSAVYYCILD
>V40RF-ABDC01369760.1-iglv |(2306, 2610)|1.59097630692|(0.553,0.596,0.474)|1
TSQEVVTQETSLLTTPGGTVTLTCGSSTGAVTTSNYANWVQQGSNEVPRGLIYGTSNRYP
GVPARFSGSLLGDKAALTITGAQAEDEAEYYCALWFSNH
>V41RF-ABDC01373300.1-ighv |(1180, 1499)|2.97376801985|(0.990,0.997,0.987)|1
VQCEVQLVESGGGLVQPGGSLRLSCVASGFTLTSYGMNWVRQAPGKGLEWISYIYSSSTS
YADSVKGRFTISTDNGKNTLYLQMNSLRAEDTAMYYCARHTVRG
>V42RF-ABDC01373301.1-ighv |(8478, 8785)|2.99280401921|(1.000,1.000,0.993)|1
VQCEVQLVESGGGLVQPGGSLRLSCAASGFTFSSYYMHWVRQAPGKGLEWVSRINPDGGS
TIYADAVKGRFTISRDNSKNSLYLQMNSLKAEDTAVYYCA
>V43RF-ABDC01375549.1-ighv |(174, 483)|2.99899200002|(0.999,1.000,1.000)|1
VQCEVQLVESGGGLVQPGGSLRLSCAASGFTFSSYWMNWVRQAPGKGLEWVADINGDGGS
TNYADAVKGRFTISRDNAKNSLYLQMNSLRAEDTALYYCAT
>V44RF-ABDC01375549.1-ighv |(8525, 8840)|2.97950008499|(0.995,1.000,0.985)|1
VQCEVQLVESGGGLVQPGGSLKLSCVASGFTFSDYYMHWVRQAPGKGLEWVAFIRNKANG
GTAEYAASVKGRFTISRDDSKSTAYLQMNSLRTEDTAVYYCER
>V45RF-ABDC01377237.1-ighv |(8637, 8946)|2.99596000066|(1.000,0.997,0.999)|1
VQCDVQLVESGGGLVQPGGSLRLSCAASGFTFSSYWMYWVRQAPGKGLEWVSAISGNGGS
TYYADAVKGRFTISRDNGKNTLYLQMNSLKAEDTAVYYCAR
>V46RF-ABDC01377653.1-trav |(1660, 1950)|2.89429565252|(0.974,0.975,0.948)|1
MSRGEKLEQSPFLSVQEGDSSVINCTYTETTSTYFYWYKQGPREGLQLIMTIFSYEDKKQ
ERRLSVLLNKMEKHLSLHISDTQPADSAVYFCAVS
>V47RF-ABDC01377655.1-trav |(2230, 2518)|2.4182470184|(0.771,0.831,0.866)|1
VHSQKIEQNPWALSIQEGETAAVTCNYTSYSPAFFQWYRQDPEKGLVFLLLIRENEGEKQ
EGRLKVTFDTKLKQSSFYIADSQPADSAAYLCAA
>V48RF-ABDC01377657.1-trav |(531, 828)|1.81594686745|(0.740,0.691,0.541)|1
DAGAQSVTQPDGHVTVSEEHSLELRCNYSYGGAFYLFWYVQYPGHGLQLLLRYFSGDTLV
KGIKGFEAELRKNESSFTLRKPRVHWSDTAEYFCALS
>V49RF-ABDC01379531.1-trav |(895, 1198)|2.86994173299|(0.990,0.912,0.992)|1
SGMAQKVTQSQPAMWVQEKEAVTLDCTYDTRDSTYYLFWYKQPSSGEMILLIRQDSYNQQ
NATEGRYSLNFQKASKSIKLVISASQVGDSAIYFCALSE
>V50RF-ABDC01379531.1-trav |(6655, 6946)|2.9758720041|(0.992,0.996,0.988)|1
VRSQQKEVDQTPEFLSVSEGAMASLNCTYSNTASRYFFWYRQYSGKGPELLVSIFSTGDK
QEGRFTAQLNKASRYVSLVIRDSQPSDSATYLCAL
>V51RF-ABDC01384522.1-iglv |(5368, 5671)|2.01434846419|(0.937,0.563,0.943)|1
AVSPYELTQPPSVSVTPGQTARIPCSGDKLGEKYVYWYQQKPGQAPVLVIYKDSERPSGI
PERFSGSSSGNTAALTISGAQAGDEADYYCHVWDSSSDH
>V52RF-ABDC01384523.1-iglv |(1675, 1975)|2.97880001921|(0.995,0.988,0.996)|1
SVASQLTQVPAVSVALGQTASITCQGDGLSSDYANWYQQKPGQAPVLLIYGENQRPSGIP
ERFSSSVSGDTATLTISGAQAGDEADYYCQVWDSENNK
>V53RF-ABDC01388284.1-trav |(3312, 3602)|2.85573926526|(0.964,0.911,0.996)|1
VRSQQVVEQTPESLVVSEGTTASLSCTYSDTASQSFLWYRQYSGKGPELLMFIYSTGDKE
EGRFTAQLNKASRNVSLLIRDSQPSDSATYLCAVS
>V54RF-ABDC01388284.1-trav |(7133, 7430)|2.49466672475|(0.896,0.814,0.829)|1
GTWAQRVTQPDGHITVSEGDPLELRCNYSSSVSPYLFWYVQYPNQGLELLLKYTSGNSLV
TGIKSFKAEFNKGETSFHLKKASAHLSDSAQYFCAVS
>V55RF-ABDC01388286.1-trav |(1105, 1402)|2.09998162667|(0.886,0.926,0.590)|1
DTRAQSVTQPDGHVTVFEGDSVELRCNYSYGATPYLFWYVQYPGQGLQLLLQYYSGNTLV
QGIKGFEAEVRKDESSFTLRKPRVHWSDTAEYFCALS
>V56RF-ABDC01391612.1-ighv |(2185, 2509)|2.74982119202|(0.917,0.934,0.901)|1
AHSEVQLVQSGAEVKPPGASVKVSCKASGYTFTSYAMHWVRQAPGQGLEYMGWINTNTGG
TSYAQKFQGRVTMTRDTSTSTAYMELSSLRPEDTAVYYCARDTVLQ
>V57RF-ABDC01393119.1-trav |(29, 326)|2.09998162667|(0.886,0.926,0.590)|1
DTRAQSVTQPDGHVTVFEGDSVELRCNYSYGATPYLFWYVQYPGQGLQLLLQYYSGNTLV
QGIKGFEAEVRKDESSFTLRKPRVHWSDTAEYFCALS
>V58RF-ABDC01394567.1-igkv |(5428, 5726)|2.92149471963|(0.957,0.984,0.987)|1
TRCDIQMTQSPSSVSASPGETVTISCRASQGINNNLVWYQHKPGKPPKSLIYGASNLYPG
VLSRFSGSGSGTDYSLTIRGLETDDAATYYCQQYNSF
>V59RF-ABDC01394567.1-igkv |(9543, 9858)|2.58113028259|(0.945,0.792,0.934)|1
SSGDVVMTQTPLSLPVTPGESVSITCRASQSLQDSDGNTYLNWVLQKPGQPPKRLIYKVS
NGDNGVSDRFSGSGSGTDFTLKISRVEAEDVGVYYCMQASYFP
>V60RF-ABDC01396012.1-igkv |(1397, 1712)|2.43446559719|(0.977,0.750,0.911)|1
SSGEIVMTQSPLSLPVTPGEPASISCRSSQSLLHSNGNTYLQWFLQKPGQSPQLLIYLGF
TRASGVPDRFSGSGSGTDFTLKISRVEAEDVGVYYCMQAIQYP
>V61RF-ABDC01398089.1-iglv |(1263, 1573)|2.53134397116|(0.936,0.836,0.837)|1
SLANLVLTQPSSVSGSPGQKVTISCTRSSGDIGGYYVHWHQQRPGSAPTTVIYEDNERPS
GVPDRFSGSIDSSSNSASLTISGLQSEDEADYYCQSYDDSC
>V62RF-ABDC01398089.1-iglv |(8544, 8868)|2.40725275647|(0.841,0.794,0.791)|1
SLSQPVLTQPPSLSASLGASAGLTCTLSSGTVVGGYHISWYQQKPGGPPRYLLRYYSDSD
KHQGSGVPSHFSGSKDASANAGILQVSRLQPEDEADYYCMTYHANS
>V63RF-ABDC01399103.1-trbv |(74, 387)|2.21876025407|(0.845,0.659,0.844)|1
PLDTAVFQTPKYLLTQTGNDVSLKCEQTLGYDTMYWYKQDSTKLLKIMFIYSNKEKILNE
TASNRFSPESPDKAHLNLHINSPEPGDSAVYLCASSYDTALQ
>V64RF-ABDC01399713.1-iglv |(4883, 5179)|2.13565801293|(0.983,0.645,0.901)|1
SWAQSALTQPPSVSGAPGQSVTISCSNIKGSYAHWYQQLPGTAPKLLIYYNSDRASGVPA
RFSGSKSGSSASLTIAGLQAEDEADYYCQSYDSSLDA
>V65RF-ABDC01405194.1-trbv |(1647, 1933)|2.28759483777|(0.915,0.807,0.734)|1
AGVTQTPGHLIRARGQQMTLKCFPVSGHNRVYWYQQTPGQGLQFLIEYYNGEQGQKENIS
PRFSGHQFSDYRSELNLSALELGDSALYLCASS
>V66RF-ABDC01405197.1-trbv |(132, 429)|2.45722223146|(0.792,0.951,0.812)|1
HVGAMVMQNPRYQVTRVGKTVTLSCSQNMNHDTMYWYQQKLSQAPKLLFYYYDTEFNNET
DTSYNFQPSRPNTSFSSVDIRSPGLGDSAVYLCASSR
>V67RF-ABDC01407894.1-ighv |(4990, 5305)|2.99393200206|(0.999,1.000,0.995)|1
VQCEVQLVESGGGLAQPGGSLRLSCAASGFTFSDYYMSWVRQAPGKGLEWVGFIRNKANG
GTAEYAASVKGRFTISRDDSKSTTYLQMNSLRAEDTALYYCAR
>V68RF-ABDC01410282.1-trav |(2484, 2790)|1.60649604922|(0.546,0.800,0.925)|1
SGMSQQIIQPQLAISKQEGETVELECSYDTSVPYHILYWYKRPPSGEIIYLIHHRIDADT
NATTQGRYSVSFQKATKTIRLIISSSQPEDSATYFCCLRQ
>V69RF-ABDC01417489.1-ighv |(3793, 4108)|2.99899600001|(1.000,1.000,0.999)|1
VQCEVQLVESGGGLAQPGGSLRLSCAASGFTFSDYYMNWVRQAPGKGLEWVGVIRNKANG
GTAEYAASVKGRFTISRDDSKSTAYLQMNSLRAEDTALYYCAR
>V70RF-ABDC01417539.1-iglv |(3342, 3652)|2.95004798746|(0.998,0.994,0.963)|1
SLANIVLTQPSSVSGSPGQKVTLSCTRSSGDIGSSYVSWYQQRPGSAPTTVIYEDNERPS
GVPDRFSGSIDSSSNSASLTISALQSEDEADYYCQSYDDSY
>V71RF-ABDC01418168.1-iglv |(580, 890)|1.98563331767|(0.932,0.658,0.763)|1
SLSQPVVTQPPSLSASPGASARLTCTLRSDISVGGKDMYWYQQKPGSPPRYLLYYYSDSN
KHQGSGVPSRFSGSKDASANAGILHVSGLQPEDEADYYCAV
>V72RF-ABDC01418168.1-iglv |(5505, 5817)|2.89868542411|(0.982,0.976,0.946)|1
SLANLVLTQPSSVSGSPGQKVTISCTRSSGDIGDAYVTWYQQRPGSAPTTVIIGDDQRPS
RVPDRFSGSIDSSSNSASLTISGLQSEDEADYYCQSYGIRNS
>V73RF-ABDC01418428.1-trav |(328, 621)|2.91992564019|(0.953,0.987,0.990)|1
VRGGENVGLHPPTLSVQEGDTSVINCSYSDSASSYLLWYKQKLGKSPQSIIDIRSNMGKK
QKGRFTVFLSKTAKHLSLHIAATQPGDSAVYFCAES
>V74RF-ABDC01421861.1-ighv |(7067, 7376)|2.96496052424|(0.984,0.982,1.000)|1
VQCEVQLLESGGGLVQPGGSLRLSCAASGFTFSSYYMSWVRQAPRKGLEWVSYINGDGGY
TNYADAVKGRFTISRDNSKNSLYLQMNNLKAEDTAMYYCAR
>V75RF-ABDC01422153.1-iglv |(2569, 2876)|2.97578801933|(0.989,0.991,0.996)|1
SWAQSALTQPPSASGAPGQSVTISCSGSSSNIGGNYANWYQQLPGTAPKLLIYGNSDRPS
GVPARFSGSKSGSSASLTIAGLQAEDEGDYYCSSWDDSLS
>V76RF-ABDC01423814.1-ighv |(3316, 3625)|3.0|(1.000,1.000,1.000)|1
VQCEVQLVESGGGLVQPGGSLRLSCAASGFTFSSYAMSWVRQAPGKGLEWVSTISNGGGS
TYYTDAVKGRFTISRDNSKNSLYLQMNSLRAEDTALYYCAR
>V77RF-ABDC01436920.1-trav |(1407, 1731)|2.47624294032|(0.784,0.882,0.903)|1
VSGQNQVEQSPQSLIILEGENGTLQCNHTVSPFNNLRWYKQETGKGPVSLIIMTYSKNKE
SKGRYTATLDANTKQSSLHVTASQLSDSASYICVVSALCFPGTDSQ
>V78RF-ABDC01437312.1-trav |(895, 1195)|2.13601926864|(0.676,0.826,0.733)|1
STVAQKVTQAQPATSMTVGQAVILNCQYETSWPQYYIYWYKQIPSKEMIFLLRQGSTRPS
EKSGRYSLNFEKEDKSINLTISALRLEDSAKYYCALQE
>V79RF-ABDC01440240.1-trav |(775, 1062)|1.92810778779|(0.720,0.555,0.956)|1
GVRGLEVRQSPSVLSVQEGASPTLRCNFSATVTSMQWFLQKSGGSLISLFYMASGTKQNG
RLNSTMNNKELYSTLHITATQLEDSGTYLCAAEE
>V80RF-ABDC01440241.1-trav |(2301, 2594)|2.49289344747|(0.867,0.752,0.958)|1
VRGGENVGLHPPTLSVQEGDTSVINCSYSNSASIYFSWYKKELGKGPQFIIDIRSNRDKK
EEQRFTIFVNKTVKHLSLHIAGTQPGDSAVYFCAES
>V81RF-ABDC01440315.1-trav |(2257, 2544)|1.68905616193|(0.628,0.484,0.661)|1
GVRGLDVQQSPSVLSVQEGASPTLRCNFSATVYSMQWFRQNPGGGLINLFFMTSGTKQNG
RLNSTMNSKELYGTLHITATQLEDSGTYLCAVPD
>V82RF-ABDC01440685.1-ighv |(539, 848)|1.87348200044|(0.982,0.992,0.502)|1
AHSEVQLVQSGAQVKPPGASVKVSCKASGYTFTSYYMHWVRQAPGQGLEWVGRINPSSGE
TNYAQKFQGRVTMTRDTSTSTAYMELSSLRPEDTAVYYCAR
>V83RF-ABDC01442374.1-iglv |(1223, 1533)|2.97609640489|(0.997,0.982,0.998)|1
SLTNLVLTQPNSVSGSPGQKVTISCTRSTGSIGGYFVHWYQQRPGSAPTTVIYADDQRPS
GVPDRFSGSIDSSSNSASLTISGLQSEDEADYYCQSYDDSY
>V84RF-ABDC01445022.1-trav |(2658, 2952)|2.94372055687|(0.979,0.995,0.971)|1
SVTQTEGQMLLTERDSLIVNCSYETSQYPSLFWYVQYPGEGPQLLLKAMKANDKGINKGF
EATYNRETTSFHLQKASVHESDSAVYYCALSDTVTG
>V85RF-ABDC01446518.1-igkv |(1290, 1603)|2.54961587451|(0.972,0.882,0.818)|1
SSGDVVMTQTPLSLPVTPGESASISCRASQSLLYSDGNTYLNWFLQKPGQPPKLLIYKIS
NRDSGVSDRFSGSGSGTDFTLKISRVEAEDVGVYYCTQGTKL
>V86RF-ABDC01449636.1-iglv |(4939, 5239)|2.97940816598|(0.998,0.986,0.996)|1
SVASQLTQVPAVSVALGQTARITCQGDSLSSYYPNWYQQKPGQAPVLLIYGENQRPSGIP
ERFSSSVSGDTATLTISGAQAGDEADYYCQVWDSENNK
>V87RF-ABDC01454767.1-ighv |(1191, 1500)|2.99899200002|(0.999,1.000,1.000)|1
VQCEVQLVESGGGLVQPGGSLRLSCAASGFTFSSYWMNWVRQAPGKGLEWVADINGDGGS
TNYADAVKGRFTISRDNAKNSLYLQMNSLRAEDTALYYCAT
>V88RF-ABDC01466438.1-iglv |(4568, 4875)|2.97578801933|(0.989,0.991,0.996)|1
SWAQSALTQPPSASGAPGQSVTISCSGSSSNIGGNYANWYQQLPGTAPKLLIYGNSDRPS
GVPARFSGSKSGSSASLTIAGLQAEDEGDYYCSSWDDSLS
>V89RF-ABDC01472745.1-igkv |(710, 1025)|2.00121444272|(0.845,0.655,0.708)|1
SSGDVVMTQTPLSLPVTPGELASISCRASESLLYSDGNTYLNWFVQKPGQPPKRLIYKVS
NRDNGVSDRFSGSGSGTDFTLKISRVEAEDVGVYYCVQGTKLP
>V90RF-ABDC01487737.1-trbv |(1203, 1500)|1.94829097886|(0.927,0.862,0.572)|1
SVTAGVTQTPRFQILKTGQNTTLTCTQDTNHEEMYWYRQDPGLGLRLIYYSVGVGITEKG
QVYNGYNVSRSSTETFPLTLESATPSQTSGYFCASSE
>V91RF-ABDC01488042.1-igkv |(970, 1286)|2.14487879182|(0.705,0.685,0.777)|1
SLSQPVLTQPPSASASPGASAKLTCTLSSAHSGYTIAWHQQQPGKAPRYLMRVYSDGSQS
KGDGIPDRFSGSSSGADRYLTISNVQPEDEADYYCQTGDSSGV
>V92RF-ABDC01490559.1-trbv |(1388, 1679)|2.66537212748|(0.883,0.894,0.889)|1
AGVSQSPRHKVTERGQNVTLSCDPISGHNVLYWYRQTLGQGPQYLVYFQGREATDKSGLR
SERISAERPEGSFSTLKIQLAEQGDSAVYLCASSL
>V93RF-ABDC01491653.1-trav |(356, 647)|2.9758720041|(0.992,0.996,0.988)|1
VRSQQKEVDQTPEFLSVSEGAMASLNCTYSNTASRYFFWYRQYSGKGPELLVSIFSTGDK
QEGRFTAQLNKASRYVSLVIRDSQPSDSATYLCAL
>V94RF-ABDC01492430.1-ighv |(1622, 1908)|1.75834753287|(0.663,0.538,0.624)|1
EVRPPGASVKVSCKASGYTFTSYYMYWMKQAPGQGLEWMRRIDPEDGSTRYAQKFQGRVT
MTATTSTNTAFMELSNLRPEDTAVYYCARHSVT
>V95RF-ABDC01497734.1-trdv |(531, 837)|2.75263136878|(0.928,0.952,0.883)|1
STVAQKVTQVETARSTTVGAVVTLNCQYETSGGAYFFIFWYKQLPSKEMIFLLRQGSDLY
NAKDDQRYSVNFQEEANSIDLTISALRLEDSAKYFCALAE
>V96RF-ABDC01498106.1-iglv |(348, 644)|2.13565801293|(0.983,0.645,0.901)|1
SWAQSALTQPPSVSGAPGQSVTISCSNIKGSYAHWYQQLPGTAPKLLIYYNSDRASGVPA
RFSGSKSGSSASLTIAGLQAEDEADYYCQSYDSSLDA
>V97RF-ABDC01519549.1-trav |(483, 780)|1.96679962568|(0.901,0.858,0.570)|1
DARAQSVTQTDGHVTVFEGDSVELRCNYSYGATPYLFWYVQYPGQGLQLLLQYYSGNTLV
QGIKGFKAEFRKNESSFTLRKPRVHWSDTAEYFCALS
>V98RF-ABDC01522041.1-igkv |(82, 382)|2.98482001102|(0.992,0.998,0.995)|1
ARCDIQMTQSPSSLAASVGDTVTISCRASQGISSWLSWHQQKPGKPPKTLINKASNLESG
VPSRFSGSGSGTDFTLTIKGLQPEDFATYYCQQYDSSP
>V99RF-ABDC01523330.1-igkv |(1251, 1566)|2.34943771408|(0.967,0.693,0.950)|1
SSGEIVMTQSPLSLPVTPGEPASISCRSSQSLLHSNGNTYLYWFLQKPGQSPQPLIYLVS
NRFSGVSDRFSGSGSGTDFTLKISRVEAEDVGVYYCMQDLQTP
>V100RF-ABDC01526110.1-trav |(609, 906)|1.81594686745|(0.740,0.691,0.541)|1
DAGAQSVTQPDGHVTVSEEHSLELRCNYSYGGAFYLFWYVQYPGHGLQLLLRYFSGDTLV
KGIKGFEAELRKNESSFTLRKPRVHWSDTAEYFCALS
>V101RF-ABDC01527872.1-trbv |(327, 624)|2.56117027154|(0.865,0.886,0.820)|1
PLDTAVFQTPKYLLTQTGNNVSLKCGQTLGHDNMYWYKQDATKLLKIMFSYNNQELMVNE
TASNRFSPESPDKAHLNLHINSPEPGDSAVYLCASSD
>V102RF-ABDC01533414.1-trav |(231, 518)|2.56001491226|(0.818,0.880,0.912)|1
VNSQQGEENLQALSIQEGENATINCSYTSSINNLQWYRQDAGRGPTLLILIRANKREERH
GRLTATLNPSIKSSSLIITASCAADTATYFCATD
>V103RF-ABDC01533415.1-trav |(1221, 1515)|2.95496034001|(0.978,0.992,0.986)|1
GTDGDSVTQTEGPVTLPEGEALTLNCTYQSNYAAFLFWYVQFQNKEPELLLKSSSETQET
DGRGFQANNNKSDSSFHLKKPSVQLSDSAVYFCAMR
>V104RF-ABDC01542818.1-trav |(328, 615)|2.87823134214|(0.967,0.933,0.984)|1
VSSEDKVVQSPPSMAVHEGDSATLTCNYVVSYFRSLQWYKQEKNAPVFLFTLTSSGIEKK
SGRFSSILDNKELSTLNITATQTGDSAIYFCAVE
>V105RF-ABDC01543158.1-trav |(548, 845)|1.90805469513|(0.748,0.660,0.607)|1
LNGQQVKQIPEFLHIQEGEDFSIYCNSTSTLTTAQWYKQRPGGSPVLLMILVKDGEVKEK
RLTAQFVETRKGSSLHITAAQTADVGTYFCAVAQCSP
>V106RF-ABDC01556235.1-iglv |(1158, 1468)|2.15022891511|(0.806,0.781,0.654)|1
SLSQPVVTQPPSLSASPGASARLTCTLSSGFSVGSYAISWHQQKPGSPPRYLLYYHTDSD
KHQGSGVPSRFSGSKDALANAGILHVSGLQPEDEADYYCAV
>V107RF-ABDC01570800.1-iglv |(151, 463)|2.72445607664|(0.935,0.953,0.860)|1
SLANLVLTQPSSVSGSPGQKVTISCTRSSGDIGDAYVNWYQQRPGSAPTTVIYGDDQRPP
RVPDRFSGSIDSSSNSASLTISGLQSEDEGDYYCQSYGIRNS
>V108RF-ABDC01583217.1-igkv |(589, 904)|2.5925304632|(0.993,0.793,0.959)|1
SSGDIVMTQTPLSLPVTPGEPASISCRSSQSLLHSDGKTYLYWYLQKPGQSPQLLIYLGF
TRASGVPDRFSGSGSGTDFTLKISKVEAEDVGVYYCMQTIQLP
>V109RF-ABDC01598575.1-trbv |(504, 790)|2.24518555618|(0.769,0.677,0.884)|1
AGVTQTPGHLITARGQQVTLKCSPVSGHPSVFWYKQALGEGPQFLIQYYEEKESDKGNFP
ARFSGHQFSDYRSELNLSALELGDSALYLCASS
>V110RF-ABDC01598827.1-trav |(951, 1238)|1.68905616193|(0.628,0.484,0.661)|1
GVRGLDVQQSPSVLSVQEGASPTLRCNFSATVYSMQWFRQNPGGGLINLFFMTSGTKQNG
RLNSTMNSKELYGTLHITATQLEDSGTYLCAVPD
>V111RF-ABDC01599688.1-igkv |(938, 1236)|2.46192287504|(0.953,0.993,0.719)|1
IRCDIQMTQSPSSLAASPGETVTISCRASQGISNYLSWYQQKPGKPPKSLIYGASNLHSG
VSSRFSGSGSGTDYSLTIRGLETDDAATYYCQQGHSY
>V112RF-ABDC01281089.1-trbv |(2653, 2950)|2.46805121372|(0.837,0.857,0.786)|-1
PMDTGVTQTPRHLVMGMTDKKSLECGQNLEHNAMYWYKQSAKKALEPLFIFNYKKLYENV
TVPSRFTPEYQDNAHFYLHLDALQPEDSATYLCASSQ
>V113RF-ABDC01281093.1-trbv |(2708, 3003)|1.95960046125|(0.843,0.628,0.718)|-1
TQTPRHLVMGMTDKKSLECEQNLGHNAMYWYKQSAKKAPELMFLCRLQKLTDNLTVPSRF
TPECRDSSHLYLHLDALQPEDSATYLCASSQDTALQ
>V114RF-ABDC01281094.1-trbv |(2622, 2919)|2.59350948397|(0.879,0.846,0.873)|-1
PLDTAVFQTPKYLLTQTGNDVSLKCEQTLGHNSMYWYKQDSTKLLKIMFSYNNQEKILNE
TASNRFSPESPDKAHLNLHINSPEPGDSAVYLCASSD
>V115RF-ABDC01281096.1-trbv |(2097, 2394)|2.57540636824|(0.868,0.928,0.808)|-1
PTDTGVTQTPRHLVMGMTDKKSLKCHQNLGHNAMYWYKLSAKKPPELMFYYYYQALRENM
TVPSRFSPECPDNSHLYLHLDALQPEDSATYLCASSQ
>V116RF-ABDC01281097.1-trbv |(3192, 3492)|2.79204630182|(0.954,0.902,0.947)|-1
HTEPGVIQTPSHQVTKKGQEVILRCDPISGHLYFYWYRQISGQKLEFLVSFYNDNISEKS
ELFTDQFSLKRPKGSYLALKIQSTELEDSAMYFCASSK
>V117RF-ABDC01281097.1-trbv |(8780, 9077)|2.55468111685|(0.855,0.905,0.812)|-1
PLDTAVFQTPKYLLTQMGNNVALKCGQTLGHDYMYWYKQDSTKLLKIMFTYNNQELMLNE
TASNRFSPESPDKAHLNLHINSPEPGDSAVYLCASSD
>V118RF-ABDC01345813.1-ighv |(1734, 2043)|2.91077738452|(0.994,0.977,0.949)|-1
VRCEVQLVESGGGLVQPGGSLRLSCAASGFTFSSYGMHWVRQAPGKGLEWVAVIRYDGSK
QYYADAVKGRFTISRDNSKNMLYLQMNSLKVEDTAMYYCAK
>V119RF-ABDC01345814.1-ighv |(4248, 4551)|2.72102699409|(0.961,0.861,0.940)|-1
VQCDVQLVESGGGLVQPGGSLRLSCAASGFTLSSYGMNWVRQAPGKGLEWVSYIYSSSTY
YADSVKGRFTTSRENSQNMLYLQMNSLRDEDTAMYYCAR
>V120RF-ABDC01345817.1-ighv |(603, 906)|2.88506016446|(0.965,0.984,0.940)|-1
VQCEVQLVQSGGGLVQPGGSLRLSCAASGFTFSSYGMNWVRQAPGKGLEWVSYIYSSSTY
YADSVKGRFTTSRENSQNMLYLQMNSLRDEDTAMYYCAR
>V121RF-ABDC01358932.1-igkv |(615, 919)|2.67279166555|(0.979,0.827,0.957)|-1
SSGDIVMTQTPLSLPVTLGEPASISCRSSQSLLHSDGNSYMCWYLQKPGQSLQPLIYRVS
NRFSGVPDRFSGSGSGTDFTLKISRVEAEDVGVYYCMQD
>V122RF-ABDC01363308.1-ighv |(7252, 7561)|1.89986037263|(0.972,0.985,0.513)|-1
AHSQVQLVQSGAEVRPPGASVKVSCKASGYTFTSYYMHWVKQAPGQGLEWMGRVDPEDGS
TSYAKKFQGRVTMTATTSTNTAFMELSNLRPEDTAVYYCAR
>V123RF-ABDC01368596.1-trbv |(1048, 1348)|2.16007918266|(0.823,0.818,0.642)|-1
HTDAGVIQTPRHEVTEMGQAVTLKCEPISGHDTLLWYKQTLVQGLELLTYFRSQSQIDDA
GMPKGRFSAEMPNASFSTLKIQPTELRDSAVYLCASSS
>V124RF-ABDC01368601.1-trbv |(2109, 2406)|2.89100384073|(0.989,0.935,0.979)|-1
SVTAGVTQTPRFQILKTGQNMTLMCTQDTNHDSMYWYRQDPGLGLRLIHYSVAAGTTARG
DIPEGYNVSRSSTETFSLTMESATPSQTSAYFCASSE
>V125RF-ABDC01368602.1-trbv |(3661, 3963)|1.66231950817|(0.779,0.589,0.578)|-1
AGVTQTPGHLIKARGQQVTLKCFPVSGHDQVSWYQQALGQGPQFLIQYYGGQELEKGNFP
ARFSGHQFRDYRSELNLSALELGDSALYLCASSFHSPAE
>V126RF-ABDC01381867.1-igkv |(294, 582)|1.86992258934|(0.611,0.641,0.622)|-1
TTGNTALIQFPEHLTASLGDSVSINCRAGQSISDYLSWYQQKPGQAPKLLIYDADNLYSG
VSSRFTGLQSGTEFILTITNVKADDAATYYCQQD
>V127RF-ABDC01396906.1-ighv |(901, 1210)|2.99196000066|(0.998,0.995,0.999)|-1
VQCEVQLVESGGGLVQPGGSLRLSCAASGFTFDYYGMNWVRQAPGKGLEWVSYISWNGGS
TYYADAVKGRFTISRDNSKNMLYLQMNSLRAQDTAVYYCAR
>V128RF-ABDC01406436.1-iglv |(5624, 5924)|1.95484340319|(0.643,0.949,0.681)|-1
SVASQLTQVPAVSVALGQTASITCQGDGIRSYYANWYQQKPGQAPVLLIYSDNNRPSGIP
ERSSGSNSGNMATLTMNRAQADDEGDYHCQSFDSRGTL
>V129RF-ABDC01418360.1-iglv |(1917, 2229)|2.61174074182|(0.943,0.866,0.856)|-1
SVAFQLTQVPAVSVALGQTASITCQGEGLSSYYVNWYQQKPGQAPVLIIYTDIFSNSNRP
SGIPERFSSSVSGDTATLTISGAQAQDEADYYCQVWVSENNK
>V130RF-ABDC01419594.1-ighv |(2167, 2474)|2.02249532864|(0.972,0.970,0.565)|-1
AHSQVQLVQSGAEVKPPGASVKVSCKASGYTFTSYYMHWVRQTPGQGLEWMGEINPNSGG
TSYAQKFQGRVTMTRDTSTSTAYMELSSLRPDDTAVYYCA
>V131RF-ABDC01425625.1-iglv |(109, 419)|2.90203393391|(0.998,0.997,0.927)|-1
SLANFVLTQPSSVSGSPGQKVTISCTRSSGNIGSYYVQWYQQRPGSAPSTVIYKHNKRPS
GVPDRFSGSIDSSSNSASLTISGLQSEDEADYYCQSYDGSY
>V132RF-ABDC01454736.1-trav |(1674, 1968)|2.93761652199|(0.971,0.986,0.982)|-1
RTHGNSVTQTEGQVTLSEKAFLHINCTYTSTGYPSLFWYVQYPGEGPQLLLKAATANDKG
MNKGFEATYKKETTSFHLEKASVHESDSAVYYCAMS
>V133RF-ABDC01455982.1-trbv |(239, 546)|2.82423415562|(0.975,0.970,0.901)|-1
HTDAGITQNPRHKITEIGKQVTLSCHQNDNHFYMYWYRQDLGHGLRLIYYSVDAQSTDKE
EVAEGYKVSRSNKEDFLLFLESATRSQTSVYFCASSEYTA
>V134RF-ABDC01465190.1-iglv |(381, 691)|2.98097252412|(0.999,0.983,1.000)|-1
SLANFVLTQPSSVSGSPGQKVTVSCTRSSGNIGSNYVYWYQQRPGSAPTTVIYRDDQRPS
GVPDRFSGSIDSSSNSASLTISGLQSEDEADYYCQSYDGSA
>V135RF-ABDC01471087.1-ighv |(643, 952)|2.99799600001|(0.999,1.000,0.999)|-1
VQCEVQLVESGGGLVQPGGSLRLSCAASGFTFSDYWMNWVRQAPGKGLEWVAHIRYDGSK
QYYADAVKGRFTISRDNSKNSLYLQMNSLRAEDTALYYCAR
>V136RF-ABDC01473376.1-trbv |(205, 505)|2.80807249552|(0.962,0.957,0.903)|-1
SYDAKVTQTPGHLIKEKGQKASMDCTPQQGHNSLYWYQQSQNKELEFLVYFENKELFDQT
EMHKKRFSSKCPPDSPCRLEILSSEPGDSALYFCASSP
>V137RF-ABDC01491936.1-trbv |(1492, 1778)|1.88421495484|(0.831,0.547,0.789)|-1
AGVTQTPRHLITARGQQVTLKCFPVSGHNQVSWYQQALGQGLQFLIQYFEGEEREKGNFP
ARFSGHQFSDYRSELNLSALELGDSALYLCASS
>V138RF-ABDC01493416.1-ighv |(429, 735)|2.98374403277|(0.992,0.992,1.000)|-1
VQCDVQLLESGGGLVQPGGSLRLSCAASGFTLSSYYMHWVRQAPGKGLEWVSTISSGGST
YYADAVKGRFTISRDNGKSSLYLQMNSLKAEDTAVYYCAR
>V139RF-ABDC01493570.1-iglv |(337, 641)|1.59097630692|(0.553,0.596,0.474)|-1
TSQEVVTQETSLLTTPGGTVTLTCGSSTGAVTTSNYANWVQQGSNEVPRGLIYGTSNRYP
GVPARFSGSLLGDKAALTITGAQAEDEAEYYCALWFSNH
>V140RF-ABDC01537099.1-igkv |(1719, 2017)|2.51536173948|(0.796,0.952,0.917)|-1
TRCDIQVTQSPSSVSASPGDTVTISCRASQDISNRLSWYQQKPGKPPKALIYVASNLHSG
VSSRFSGSGSGTDYSLTIRGLETDDAATYFCRQYKNN
>V141RF-ABDC01540867.1-iglv |(1970, 2280)|2.99078801933|(1.000,0.993,0.998)|-1
SLANFVLTQPSSVSGSPGQKVTISCTRSSGNIESSYVHWYQQRPGSAPTTVIYDDNERPS
GVPDRFSGSIDSSSNSASLTISGLQSEDEADYYCQSYDASA
>V142RF-ABDC01560090.1-trbv |(258, 558)|2.90081576962|(0.963,0.989,0.952)|-1
SMDTEVTQSPRYLVKGKEQKTKMDCVPKKGHSYVYWYQKKLEEGLKFLVYLQDEDIIEKE
EIINNRFSAQCPKNSPCILEIQSTESGDSALYFCASSQ
>V143RF-ABDC01562688.1-igkv |(1193, 1508)|2.79836337428|(0.988,0.884,0.970)|-1
SSGDIVMTQTPLSLPVTPGETASISCRASQSIQYSDGNTYLNWFLQKPGQPPKRLIYKVS
NRDSGVSDRFSGSGSGTDFTLTISRVEAEDVGVYYCMQASYYP
>V144RF-ABDC01582683.1-iglv |(809, 1119)|2.24027920137|(0.943,0.933,0.652)|-1
SLSQPVLTQPSSLSASPGASARLTCTLSSGSSVGSYWINWYQQKPGSPPRYLLSYYSDSY
KHQVSGVPSRFSGSKDASANAGILHVSGLQPEDEADYYCAV
>V145RF-ABDC01624510.1-iglv |(99, 409)|2.99078801933|(1.000,0.993,0.998)|-1
SLANFVLTQPSSVSGSPGQKVTISCTRSSGNIESSYVHWYQQRPGSAPTTVIYDDNERPS
GVPDRFSGSIDSSSNSASLTISGLQSEDEADYYCQSYDASA
>V146RF-ABDC01625120.1-trbv |(508, 808)|2.08857256118|(0.678,0.871,0.678)|-1
HAGAGVSQSPRHKVTERGQNVTLSCDPISGHISLYWYRQTPEKGLEFLIYFQREEEGDKS
GLRSDRFSAERPEGSVSTLKIRAAEQGDSTLYLCTSSL
>V147RF-ABDC01653181.1-trbv |(226, 512)|2.28759483777|(0.915,0.807,0.734)|-1
AGVTQTPGHLIRARGQQMTLKCFPVSGHNRVYWYQQTPGQGLQFLIEYYNGEQGQKENIS
PRFSGHQFSDYRSELNLSALELGDSALYLCASS
>V148RF-ABDC01655862.1-trbv |(462, 762)|2.04379334446|(0.669,0.973,0.722)|-1
HAGAGVSQSPRHKVAEKGQNVTLRCDPISGHDFLYWYRHTLGQGPQFLIYFQDKGVAEQS
KLIGERISAERPEGSFSTLKIRPAEQGDSAVYLCTSSL
>V0RF-ADFV01062069.1-trbv |(9529, 9829)|2.40846471118|(0.931,0.819,0.787)|1
LTEPEVTQTPSHQVTQMGQEVILRCVPISNHLYFYWYRQILGQKFEFLVSFYSDKVSDKS
EIFDEQFSVERPDGSNFTLKIRSTKLEDSAMYFCASSE
>V1RF-ADFV01062069.1-trbv |(21787, 22100)|2.67006417842|(0.955,0.934,0.837)|1
PIDTEVTQTPKHLVMGISNKKSLKCEQHMGHRAMYWYKQKAKKPPELMFVYSYEKLSINE
SVPSRFSPECPKSSLLNLHLHALQPEDSALYLCASSQDTALQ
>V2RF-ADFV01062069.1-trbv |(29958, 30258)|2.35190581072|(0.851,0.707,0.876)|1
HTEPEVTQTPSHQVTQMGQEVILQCVPISNHLRFYWYRQILGQKIEFLLYFFDGKISEKS
EIVDDRFSAARPDGSPFTLKIQSTKLEDSATYFCASSE
>V3RF-ADFV01062069.1-trbv |(35848, 36139)|2.36699405899|(0.852,0.743,0.822)|1
PEVTQTPSHQVTQMGQEVILQCVPISNHLHFYWYRQIMGQKIEFLLYFFNGKISEKSEIV
DDRFSAARPDGSPFTLKIQSTKLEDSATYFCASSE
>V4RF-ADFV01062069.1-trbv |(42333, 42630)|2.95429565252|(0.994,0.995,0.968)|1
SLDTAVSQTPKYLVTQMGNDKSLKCEQNLGHDTMYWYKQDSKKFLKIMFSYRNKEPILNE
TVPNRFSPDSPDKAHLNLHIKSLELGDSAVYFCASSQ
>V5RF-ADFV01062069.1-trbv |(46363, 46676)|2.70051545832|(0.964,0.917,0.866)|1
PIDTEVTQTPKHLVMGMTNKKSLECEQHMGHNAMYWYKQKAKKPPELMFVYNYEKLSINE
SVPSRFSPECPKSSLLNLHLHALQPEDSALYLCASSQDTALQ
>V6RF-ADFV01062069.1-trbv |(54249, 54545)|2.84486656283|(0.964,0.904,0.995)|1
PVEAGVTQTPRYLIKTRGQQVTLSCSPISGHQSVFWYQQTPGQGLQFLFEYFSETQREKG
NFPDRFSGRQFSNSRSEMNVSTLELGDSALYLCASSL
>V7RF-ADFV01062069.1-trbv |(61551, 61848)|2.99696400065|(1.000,1.000,0.997)|1
PVNAGVTQTPKFQVLKTGQSMTLQCAQDMNHNSMYWYRQDPGMGLRLIHYSVGEGTTDKG
EVPDGYNVSRLNTQDFSLRLESAAPSQTSVYFCASSE
>V8RF-ADFV01062071.1-trbv |(8280, 8577)|2.99296000066|(0.997,1.000,0.996)|1
PVNAGVTQTPKFQVLKTGQSMTLQCAQDMNHNSMYWYRQDPGMGLRLIHYSAVEGITDKG
EVSDGYNVSRLNKQNLLLRLVSAAPSQTSVYFCASSE
>V9RF-ADFV01062071.1-trbv |(16301, 16614)|2.91517747845|(0.994,0.954,0.975)|1
PLDTAVLQTPKYLVTQTGKKESLKCEQNLGHNAMYWYKQDSKKFLKIMFSYSNKEPILNE
TVPNRFSPESPDKSHLNLHISSLELGDSAVYFCASSQDTALQ
>V10RF-ADFV01062071.1-trbv |(19707, 20020)|2.53175195002|(0.967,0.923,0.780)|1
PMETGVTQTPRHLVMGMTNKKSLKCEQDLGHNAMYWYKQSAEKPLQLMFVYNLKEQIENN
SVPSRFSPECPNSSHLFLHLHALQPEDSVLYLCASSQDTALQ
>V11RF-ADFV01062071.1-trbv |(27836, 28133)|2.98097252412|(0.999,1.000,0.983)|1
PVNAGVTQTPKFQVLKTGQSMTLQCAQDMNHNYMYWYRQDPGMGLRLIHYSTGEGTTDKG
EVSDGYDVSRSNTQNFLLRLESAAPSQTSVYFCASSE
>V12RF-ADFV01062073.1-trbv |(25101, 25398)|2.09301903415|(0.877,0.695,0.729)|1
PVMAGITQAPRSQILAVGRSMTLRCTQDMRHNAMYWYRQDLGLGLRLMHYSNTVGTTGKG
EVPDGYSVSRANTDDSPLTLASAVPSRTSVYFCASSD
>V13RF-ADFV01062075.1-trbv |(638, 934)|2.55204250109|(0.978,0.781,0.942)|1
PVDSGVTQTPKHLITAIGQRVTLRCSPRSGDLSVYWYQQSLDQGLQFLIQYYNGEERERG
NILERFSAQQFPDLHSELNLSSLELGDSALYFCASSI
>V14RF-ADFV01062075.1-trbv |(8445, 8742)|2.15156504383|(0.909,0.607,0.947)|1
HRDAEITQSPRYKITETGRQVTLKCHQTWNHNNMFWYRQDLGHGLRLIHYSFGVPDTGKG
EVSDGYSVSRSKTEDFPLTLESAASSQTSVYFCASSE
>V15RF-ADFV01062075.1-trbv |(33395, 33695)|2.98392000218|(0.994,0.998,0.992)|1
HTGAGVSQSPRYKVTKKGQDVALRCDPISGHVSLYWYRQTLRQGPEFLTYFNYEAQQDKS
GLLSGRFSAERPEGSVSTLKIQRTEQGDTAVYLCASSL
>V16RF-ADFV01062075.1-trbv |(40699, 40989)|2.92434411275|(0.981,0.973,0.971)|1
ETGVTQSPTHLIKTRGQQVTLRCSPMSGHTSVYWYQQVLGQGLQFLLWYNEEAERERGNF
PRRFSGRQFPNYSSELNVNASLLEDSALYLCASSL
>V17RF-ADFV01062075.1-trbv |(60057, 60353)|2.94684466791|(0.977,0.977,0.994)|1
SVETGVTQSPTHLIKTRGQQVTLRCSPQSGHNTVSWYQQTLGQGPQFIVQYYREEENGRG
NFPPRFSGRQFPDYSSELNVNASLLEDSALYLCASSL
>V18RF-ADFV01062075.1-trbv |(69334, 69634)|2.83047955885|(0.921,0.986,0.942)|1
HADTGVSQDPRHKITKRGRNVTFRCDPISEHNSLYWYQRTLGQGPEFLTDFQNEAQLDKS
GLLSDHFSAERPKGSFSTLKIQRTEQGDSAMYLCASSL
>V19RF-ADFV01062075.1-trbv |(75853, 76150)|2.479773716|(0.953,0.755,0.921)|1
SVAAGVIQSPRHLVKEKRETATLKCYPIPGHDTVYWYQQGPGQGPQFLISFYEKMQNDKG
SIPDRFSAQQFSDYHSELNMSSLELGDSALYLCASSL
>V20RF-ADFV01062075.1-trbv |(83965, 84262)|2.85307913138|(0.981,0.992,0.904)|1
HMDAGITQSPRHKVTETGTPVTLRCHQTENHCYMYWYRQDLGHGLRLIHYSYGVKDTDKG
EVSDGYSVSRSNTEDFLLTLGSATHSQTSVYFCAISE
>V21RF-ADFV01062075.1-trbv |(95774, 96074)|2.92152044138|(0.991,0.951,0.986)|1
LIEAGVVQSPRYKIIEKKQPVAFWCNPISGHNTLYWYRQNLGQGPELLIRYENEEAVDDS
QLPKDRFSAERLKGVDSTLKIQPAELGDSAVYLCASSL
>V22RF-ADFV01062076.1-trbv |(7831, 8127)|2.97776801985|(0.996,0.993,0.989)|1
PVDAGVTQSPTHLIKMRGQQVTLRCSPISGHTSVYWYQQALGQGPQFIIQYYEEEERGRG
NFPDRFSARQFPNYSSELNVNALLLGDSALYLCASSL
>V23RF-ADFV01062078.1-trbv |(10230, 10521)|2.59074740995|(0.958,0.938,0.796)|1
AGVTQFPSHRVIEKGQTVTLRCDPIPGHDYLYWYRRVMGKEIKFLICFLKESIQDESGMP
NNRFSAKSTGGTYSTLTVQPAELEDSGVYFCASSQ
>V24RF-ADFV01062079.1-trbv |(3580, 3877)|2.42206981644|(0.921,0.890,0.739)|1
HGDGMVIQNPRYQVTQLGKPVTLSCSQNLNHNVMYWYQQKSSQAPKLLFHYYDKDFNNEA
DTPDNFQSRRPNTSFCFLDIRSPGLGDAAVYLCATSR
>V25RF-ADFV01062079.1-trbv |(8562, 8862)|2.91698400013|(0.973,0.973,0.971)|1
SPGEEVTQTPKHLVKGEGQKAKLYCAPIKGHSYVFWYQQVLKKEFKFLISFQNENIFDET
GMPKERFSAKCLLNSPRSLEIQATKLKDSAVYFCASSQ
>V26RF-ADFV01062081.1-trbv |(16583, 16883)|2.52408184842|(0.946,0.785,0.900)|1
SMDTKVTQRPRLLVKANEQKAKMDCVPIKGHSYVYWYRKKLEEELKFLVYLQNEEIIQKA
EIINERFSAQCPKNSSCTLEIQSTESGDTALYFCASSK
>V27RF-ADFV01062081.1-trbv |(35693, 36012)|2.15602050054|(0.839,0.690,0.746)|1
SVLFPTRSVDADTTQIPRNRIAKTGKTIMLECSQTKGHDRMYWYRQDPGLGLRLIYYSFD
VKDINKGEISDGYRVSRQTQANFSLSLEFATPNQTALYFCATSD
>V28RF-ADFV01062082.1-trbv |(9024, 9321)|2.96208424741|(0.997,0.970,0.998)|1
LMEADIYQTPRYLVIRTGKKITLECSQTMGHDKMYWYQQDPGMELHLIHYSYGVNSTEKG
DLSSESTVSRIRTEHFPLTLESARPSHTSQYLCASSE
>V29RF-ADFV01062084.1-trbv |(20830, 21127)|2.92905475292|(0.996,0.963,0.976)|1
LLEAQVTQNPRYLITVTGKKLTVTCSQNMNHEYMSWYRQDPGLGLRQIYYSINVEAVDKG
DVPEGYNVSRKEKRNFPLILESPSPNQTSLYFCASSL
>V30RF-ADFV01062084.1-trbv |(25535, 25832)|2.93760565256|(0.989,0.960,0.992)|1
LVDVKVTQSSRYLVKRMGEKVFLECVQDMDHERMFWYRQDPGLGLRLIYFSYDVQMKEKG
DIPEGYSVSREKKEHFSLILESASTNQTSMYLCASSL
>V31RF-ADFV01062085.1-trbv |(301, 604)|2.36786449316|(0.854,0.875,0.715)|1
SVFSAVVSQKPSRDICQRGTSLTIQCQVNSQVTMMFWYRQQPGQSLTMIATANQGSEATY
ESGFVIDKFPISCPNLSFSTLTVSNMSPEDSSIYLCSVE
>V32RF-ADFV01106193.1-igkv |(6403, 6701)|2.53944357922|(0.815,0.851,0.968)|1
SRGEIVLTQSPAFLSVTPKEKVTITCRASQSIGSSLHWYQQKPDQSPKLLVKYASQSISG
VPSRFSGSGSGTDFTLTINSLEAEDVATYHCQQSSSL
>V33RF-ADFV01106193.1-igkv |(26068, 26361)|2.97330822856|(0.995,0.982,0.997)|1
TTREIVLTQSPATLSLSPGEKATLSCRASQSVGSNLAWYQQKPGQAPRLLIYGATNRATG
IPDRFSGSGSGTDFTLTISSLEPEDFAVYYCQKYGS
>V34RF-ADFV01106193.1-igkv |(39460, 39760)|2.4140315052|(0.955,0.998,0.699)|1
VRCDIQMTQSPSSLSASVGDRVTITCRASQSISNDLTWYQQKPGKAPTLLIYDATNLHTG
VPSRFSGGGSGADYSLTISSLQLEDFATYYCQQEYSYP
>V35RF-ADFV01106193.1-igkv |(55018, 55315)|1.85454462943|(0.628,0.573,0.674)|1
SRADIVMTQSPAFLSATPGEKVTVTCRASQSTGSSLRWYQQKPDQSPKLLVKYASQSISG
VPSRFSGSGSGTDFALTISSLKLKMLQLITVSRAVST
>V36RF-ADFV01106193.1-igkv |(68380, 68680)|2.99899600001|(1.000,1.000,0.999)|1
SRCDIQMTQSPSSLSASVGDRVTITCRASQGISNYLNWYQQKPGKAPKLLIYDASSLQSG
VPSRFSGSGSGTEFTLTISSLQPEDFAAYYCQQYKSYP
>V37RF-ADFV01106193.1-igkv |(80547, 80847)|2.97932022844|(0.998,0.985,0.997)|1
TTGEIVLTQSPATLSLSTRERATISCTASQSVSSYLAWYQQKPGQAPRLLIYYASSRATG
IPDRFSGSGSGTDFTLTISSLEPEDFAVYYCQQYKSFS
>V38RF-ADFV01106195.1-igkv |(6885, 7185)|3.0|(1.000,1.000,1.000)|1
SRCDIQMTQSPSSLSASVGDRVTITCRASQGISSYLAWYQQKPGKAPELLIYAASTLQSG
VPSRFSGSGSGTEFTLTISSLQPEDFATYYCQQYNSYP
>V39RF-ADFV01106195.1-igkv |(45397, 45697)|2.99899600001|(1.000,0.999,1.000)|1
ARCDIQMTQSPSSLSASVGDRVTITCRASQGISKWLAWYQQKPGKAPKPLIYDASSLQSG
VPSRFSGSGSGTEFTLTISSLQPEDFATYYCQQYNSYP
>V40RF-ADFV01106195.1-igkv |(64645, 64945)|3.0|(1.000,1.000,1.000)|1
ARCDIQMTQSPTSLSASVGDRVTITCRASQGISSWLAWYQQKPGKAPKLLIYKASSLESG
VPSRFSGSGSGTEFTLTISSLQPEDFATYYCQQYNSDP
>V41RF-ADFV01106195.1-igkv |(72488, 72803)|2.1199496885|(0.679,0.756,0.713)|1
CNGDIVLTQSPVSLAVSPGRMATITCRASESVSVLGMTNLIDWCQQKPGQPPKLLIYQAS
NKDTGVPARFSGSGSGTDFTLTINPVEADDAANDYCLQSKNFP
>V42RF-ADFV01126738.1-iglv |(7858, 8168)|2.92860443651|(0.991,0.951,0.993)|1
SLSQSVVTQPASLSASPGASARLTCTLRSGINVGSYRISWYQQKPGSPPQYLLNYYSDSD
KGQGSGVPSRFSGSKDASTNAGISLISGLQSEDEADYYCMI
>V43RF-ADFV01126738.1-iglv |(12674, 12983)|2.98980401921|(0.999,0.999,0.992)|1
SWAQSVLTQPSSVSGTPGQRVTISCSGSSSNIGSNNVYWYQQLPGTAPKLLIYDNNQRPS
GVPDRFSGSKSGTSASLAISGLQTEDEADYYCEAWDDSLSG
>V44RF-ADFV01126740.1-iglv |(9361, 9671)|2.19401615618|(0.967,0.623,0.982)|1
SLSQPVLTQPSSLSASPGASARLTCTFSGGIIVGGYHIFWYQQKPGSPPRYLLRYKSDSD
KHQGSGVPSRFSGSKDASANAGILLISGLQSEDEADYYCMI
>V45RF-ADFV01126741.1-iglv |(7037, 7346)|2.61927617662|(0.871,0.855,0.897)|1
SWAQSALTQPPSVSAAPGQKVTISCSGSRSDIGNYAVSWYQQLPGTAPKLLIYENNKRPS
GISDRFSGSKSGTSASLGVTGLQTGDEANYYCLAWDSSLSA
>V46RF-ADFV01126741.1-iglv |(12573, 12885)|2.58999051746|(0.984,0.776,0.989)|1
SWAQSVLTQPPSVSGSPGQRVTIFCTGSSSNIGEGYYVHWYQQLPGTAPKLLIYENNKRP
SGISDRFSGSKSGTSASLAIAGLQTGDEADYYCQSYDSSLSA
>V47RF-ADFV01126742.1-iglv |(25243, 25552)|2.97684066792|(0.998,0.999,0.981)|1
SWAQSVLTQPPSVSGTPGQRVTISCSGSSSNIGSNNVYWYQQLPGTAPKLLIYYNNQRPS
GVPDRFSGSKSGTLASLAITGLRSEDEADYYCEAWDDSLSG
>V48RF-ADFV01126755.1-iglv |(18501, 18804)|2.61554918532|(0.887,0.806,0.990)|1
SVASYELAQPSSVSVSPGQTARITCSGDVLAKKYAQWFQQKTGQSPVLLIYKDSERPSGI
PERFSGSSSGTTVTLTISGAQAEDEADYYCQSADSSGNH
>V49RF-ADFV01126756.1-iglv |(8462, 8772)|2.98892000218|(0.997,0.993,0.999)|1
SWAQSALTQPRSVSGSPGQSVTISCTGTSSDVGGYNYVSWYQQHPGTAPKLMIYDVSKRP
SGVSDRFSGSKSGNTASLTISGLQAEDEADYYCCSYASDDT
>V50RF-ADFV01126759.1-iglv |(52, 349)|2.63744151315|(0.863,0.860,0.935)|1
SVASYELIQPPSVSVSPGQTARITCSGDVLGENYADWYQQKPGQAPVLVIYKDSERPPGI
PERFSGCTSGNTATLTISRVLTEEEADYYCLSGDEDN
>V51RF-ADFV01126759.1-iglv |(7253, 7556)|2.98020030738|(0.999,0.985,0.997)|1
SATSYELTQPPSVSVAPGQTAKITCGGNNIGSKNVYWYQQKPGQAPVLVIYRDSNRPSGI
PERFSGSNSGNTATLTISAVEAGDEADYYCQVWDSTSDH
>V52RF-ADFV01126759.1-iglv |(16005, 16316)|2.71659500557|(0.970,0.839,0.974)|1
SVTSYELTQPRPVSVAPGQTARITCGGNDIGNKYVYWYQQKPGQAPVLVIYEDSNRPSGI
PERFSGSNSGNTATLTISAVEAGDEADYYCQVWDSSSKHDTV
>V53RF-ADFV01126760.1-iglv |(18689, 18992)|2.98172803289|(0.992,0.990,1.000)|1
SVASYELTQPPSVSVSPGQTAKITCSGDALPKKYAYWYQQKSGQTPVLIIYEDSKRPSGI
PERFSGSSSGTMATLTISGTQVEDEADYYCYSADSSGNH
>V54RF-ADFV01126760.1-iglv |(26179, 26490)|2.23381599972|(0.758,0.680,0.863)|1
SVASYELTQPLSVSVAPGQTARITCGGNNIGSKAVQWHQQKPGQAPVPVIYGNSNRPSGI
PERFSGSNSGNTATLIISGAQAGDEADYYCQVWDSSSKHHTV
>V55RF-ADFV01136575.1-ighv |(24647, 24950)|1.79467133129|(0.564,0.652,0.623)|1
KQWICVALSDQAVSVFAGVQCEVQLVESGGGLVQPGGSLRLSYAASGFTFSSSAMHWVRQ
ASGKGLEWVGYIRSKANSYTTAYAASVQGRFTISRDDSK
>V56RF-ADFV01136793.1-ighv |(1288, 1597)|2.32688030088|(0.807,0.798,0.740)|1
AHSKVQLVQSGTEVKKPGASVKVSCQDSGYTLTDYSKHWVRQTPGKGLQWMGGFDPVDGE
TVNSQKFQRRVTMTEDTSTDTAYMELSSLRSEDTAVYYCAT
>V57RF-ADFV01136793.1-ighv |(10260, 10566)|3.0|(1.000,1.000,1.000)|1
VQCEVQLVESGGGLVQPGGSLRLSCVASGFTFSSYDMSWVRQAPGKGLEWVSYISSGGST
YYPDSVKGRFTISRDNAKNTLYLQMNSLRAEDTAVYYCAK
>V58RF-ADFV01138112.1-igkv |(5360, 5660)|2.99798400013|(1.000,0.998,1.000)|1
ARCDIQMTQSPSSLSASVGDKVTITCRASQGISNDLNWYQQKPGKAPKLLIYYASSLQSG
IPSRFSGSGSGTTYTLTISSLQPEDFATYYCQQGYSTP
>V59RF-ADFV01192035.1-trav |(8555, 8856)|2.79105656836|(0.973,0.875,0.981)|1
GLRAQLVAQPEDQVTVAEGNPLTVKCTYSVSGNPYLFWYVQYPNQGLQFLLKYIAGDNLV
KGSYGFEAEFNKSQTSFYLKKPSALVSDSALYFCAVRD
>V60RF-ADFV01192035.1-trav |(53089, 53379)|2.9641161971|(0.988,0.978,0.999)|1
MNRGEDVEQSLFLGVREGDSSVINCTYTDSSSTYLYWYKQEPGAGLQLLTYIFSNMDLKQ
DQRLTVLLNKKDKHLSLRIADTQTGDSAIYFCAES
>V61RF-ADFV01192035.1-trav |(63802, 64090)|2.94342463332|(0.981,0.968,0.996)|1
VKSQKIEQNSEALNIQEGKTATLTCNYTNYSPAYLLWYRQDPGRGPVFLLLIRENEKEKR
KERLKVTFDTTLKQSLFHITASQPADSATYLCAL
>V62RF-ADFV01192035.1-trav |(73447, 73734)|2.90389594724|(0.982,0.936,0.995)|1
ANGEKQVEHSPHFLGSQQGDVASVSCMYSVSRFNNLQWYRQNTGMGPKHLLSMYSAGYEK
QKGRLNATLLKNGSSLYITAVQPEDSATYFCAVD
>V63RF-ADFV01192035.1-trav |(102005, 102299)|2.97195641525|(0.994,1.000,0.979)|1
GINGDSVVQTEGQVLLSEGDSLIVNCSYETTQYPSLFWYVQYPGEGPQLLLKAMKANDKG
RNKGFEATYHKETTSFHLEKDSVQEADSAVYFCALS
>V64RF-ADFV01192037.1-trav |(3179, 3470)|2.88580286128|(0.976,0.928,0.992)|1
GSCKNQVEQSPQSLIILEGKNCTLQCNYTVSPFNNLRWYKQDTGKGPVSLTIMTLSENTK
SNGRYTATLDADTKQSSLHITASQLSDSASYICVV
>V65RF-ADFV01192037.1-trav |(20251, 20539)|2.95672492248|(0.994,0.966,1.000)|1
VWSQRKEVEQDPGPFNVPEGATVAFNCTYSNSVSQSFFWYRQDCRKEPKLLMSVYSSGNE
DGRFTAQLNRASQYIYLLIRDSQLSDSATYLCAV
>V66RF-ADFV01192037.1-trav |(26000, 26297)|2.98061205453|(0.998,0.994,0.989)|1
GTRAQSVTQLDSHVSVSEGTPVLLRCNYSSSYSPSLFWYVQYPNQGLQLLLKYTSGTTLV
KGINGFEAEFKKSETSFHLTKSSAHVSDAAEYFCAVS
>V67RF-ADFV01192037.1-trav |(31699, 31996)|2.61020997727|(0.983,0.835,0.902)|1
TARAQSVTQPDIHITVSEGASLELRCNYSYGATPSLFWYVQSPGRGLQLLLKYFSGDTLV
QGIKGFEAEFQRSQSSFNLRKPSVHWSDAAEYFCAVS
>V68RF-ADFV01192038.1-trav |(2363, 2653)|2.02954461718|(0.940,0.893,0.591)|1
VNGENVEQHPSTLSVQEGESSVIKCTYSDSASNYFPWYKQELGKGPKLIIDIRSNVGEKK
DQRITVTLNKTAKHFSLHITEIQPGDSAVYFCAAS
>V69RF-ADFV01192038.1-trav |(22028, 22319)|2.94428190752|(0.999,0.955,0.998)|1
VWSQQKEVEQNSGPLSDPEGAIASLNCTYSDRSSQSFFWYRQYSGKSPELITSIYSNGDK
EDGRFTAQLNKASQYVSLLIRDSQLSDSATYLCAV
>V70RF-ADFV01192038.1-trav |(28540, 28837)|2.94271942965|(0.995,0.970,0.981)|1
GTRAQSVTQLDSHVSVSEGTLVLLRCNYSSSVSPNLFWYVQYPNQGLQLLLKYISGTTLV
KGINGFEAEFKKSETSFHLTKPSAHVSDAAEYFCAVS
>V71RF-ADFV01192038.1-trav |(50418, 50711)|2.95626365316|(0.994,0.968,0.997)|1
VSRGESVGLHLPTLSVQEGNNSVINCAYSDSASDYFTWYKQESGKGPQFIIDIRSNMDKR
QGQRVTVLLNKTVKHLSLQIAATQPGDSAVYFCAEN
>V72RF-ADFV01192039.1-trav |(5009, 5312)|2.96353206285|(0.989,0.980,0.995)|1
PGIAQKIIQTQPAMFVQEKEAVTLDCTYDTSDQSYGLFWYKQPSSGEMIFLISQASYDKQ
NATEGRYSLNFQKARKSANLVISASQLGDSAKYFCAMRE
>V73RF-ADFV01192039.1-trav |(24309, 24603)|2.97950008499|(0.995,0.985,1.000)|1
RTHGDSVTQMEGPVTLSEEAFLTINCTYTATGYPTLFWYVQYPGEGPQLLLKATRADDKG
SNKGFEATYRKETTSFHLEKDSVQESDSAVYFCALS
>V74RF-ADFV01192039.1-trav |(50026, 50319)|2.92460484445|(0.971,0.989,0.966)|1
VWCQQKEVEQNPGPLSVPEGAIASLNCTYSNSAFQYFMWYRQYSRKGPELLMYTYSSGNK
EDGRFTAQVDKSSKCISLFIRNSQPSDSATYLCAMS
>V75RF-ADFV01192039.1-trav |(63753, 64050)|1.97431599324|(0.978,0.874,0.600)|1
GTRAQSVTQLDSQVPVFEEGPVELRCNYSSSVSVYLFWYVQYPNQGLQLLLKYTSGPTLV
KGINGFEAEFKKSETSFHLRKPSAHISDAAEYFCAVS
>V76RF-ADFV01192039.1-trav |(82783, 83070)|2.89863412726|(0.990,0.932,0.990)|1
VNSQQGEEDPQALTIQEGENATMNCSYKSSTNSLQWYRQESGRGLVHLILIRSNEREKHS
GRLRVTLDTSKKSSSLLITASRAADTASYFCAME
>V77RF-ADFV01192039.1-trav |(88347, 88638)|2.96653206285|(0.994,0.985,0.988)|1
RTNGDSVTQTEGPVTLPEQAALTLNCTYQSSYSTFLFWYVQYLNKAPELLLKSSENQETD
SRGFQASHVKSDSSFHLEKPSVQLSDSAVYYCALR
>V78RF-ADFV01192039.1-trdv |(91529, 91832)|2.55416846199|(0.957,0.855,0.838)|1
SSMTQKVTQAQTEISVVEKEDVTLDCVYESRDTTYYLFWYKQLPSGELVFLIRQNSFNEQ
NEINGRYSWNFQKSTSSFNLTITASQVMDSAVYFCALND
>V79RF-ADFV01192040.1-trav |(2622, 2909)|2.30148172597|(0.854,0.670,0.923)|1
LSGEDQVTQSPEALRLQEGENSSLICSYTVSNLRGLLWYRQDPGKGPEFLFILYSAGEEK
EKERLKATLTKEESFLHITAPKPEDSATYLCAVQ
>V80RF-ADFV01192040.1-trav |(15508, 15807)|2.21049414487|(0.861,0.625,0.974)|1
VSSKQEVTQIPAALSVPEGDNLVLNCSFTDSAIYNLQWFRQDPGKGLTSLLIIQSSQREQ
TSGRLNASLDKSSGRSTLYIAASQPGDSATYLCAVRHS
>V81RF-ADFV01192042.1-trav |(5847, 6159)|1.61605767094|(0.735,0.532,0.586)|1
VRGIQVEQSPPDLILQEGANSTLRCNFSATVNNLQWFHQNPWGQLINLFYIPSGTKQNGR
LSATTVTTERYSLLYISSSQTTDSGVYFCAVEPQCSPGTFSL
>V82RF-ADFV01192042.1-trav |(20734, 21049)|1.82976403458|(0.756,0.503,0.807)|1
GVSGQQKEKSDQQQVKQSPQSLIVQKGGISIINCAYENSAFDYFPWYRQFSGKGPALLIA
IRSVVNEKEERRFKIFLNKSAKHFSLHIMDSQPGDSATYFCAA
>V83RF-ADFV01192042.1-trav |(28970, 29270)|2.0771285189|(0.682,0.655,0.851)|1
SSVAQEVTQAQSSVSMPVGKAVTLNCLYETSSWSYYIFWYKQLPSKEMILLIRQGSAEQN
AKNGRYSVNFKKAANSIALTISALRLEDSAKYFCALGE
>V84RF-ADFV01192042.1-trav |(37852, 38142)|1.59236694133|(0.915,0.509,0.752)|1
VSSVLNVEQSPQSLHVQEGDSTNFTCSFPSSNFYALHWYKWETAKSPKALFVMNLNGDEK
KKGRINATLNTKEGYSYLYIKGSQPEDSATYLCAF
>V85RF-ADFV01192042.1-trav |(45516, 45815)|2.03720603646|(0.915,0.830,0.618)|1
VNGQQIMQIPQCQHVQEGEDFTTYCNSSTTLSNIQWYKQRPGGHPVFLIQLVKSGEVKKQ
KRLTFQFGEAKKNSSLHITATQTTDVGTYFCAGHSAPQ
>V86RF-ADFV01192042.1-trav |(56528, 56818)|2.89432022844|(0.969,0.970,0.956)|1
TIIDAKTTQPTSMDCAEGRAANLPCNHSTISGNEYVYWYRQIHSQGPQYIIHGLKNNATN
EMASLIITEDRKSSTLILPHATLRDTAVYYCIVRV
>V87RF-ADFV01192042.1-trav |(77809, 78096)|2.02679751442|(0.728,0.812,0.589)|1
VSTQQLEQSPRFLSIQEGENLTVYCNSSTPVFSSLQWYRQDPGEGPVLLVTVVTGGEVKK
LKRLTFQFGDARKDSSLHITAAQPGDTGLYRCAG
>V88RF-ADFV01192042.1-trav |(83063, 83387)|2.42759500557|(0.789,0.785,0.920)|1
VNSQQKNDDQQVKQNLPSLSVQEGRISILNCDYTNSMFDYFLWYKKYPAEGPTFLISIRS
TEDKNEDGRFTVFLNKSAKHLSLHIVASQPGDSAVYLCAASAQCSP
>V89RF-ADFV01192042.1-trav |(88222, 88509)|2.27292184561|(0.837,0.664,0.901)|1
VRSQQPVQSPEAVILREGEDAIINCNSSKVLYSVHWYRQKRGEAPVFLMILLKGGEQKSH
DKISATFNEKKQQSSLYLVASQLSYSGTYFCGAE
>V90RF-ADFV01192042.1-trbv |(97069, 97372)|1.7115132406|(0.535,0.701,0.753)|1
SSMSQRVIQSQPAISTQEGETVKLDCSFKTNIVYYILYWYKRPPNEKIIFLIYQQTDADT
NATQGQYSVSFQKATETIQLIISSSQPEDSATYFCCLKE
>V91RF-ADFV01192045.1-trav |(29460, 29750)|2.68118382946|(0.893,0.956,0.854)|1
VSSEDKVVQSPLSLVVHEGDTVTLNCSYEVTNFRSLLWYKQEKKAPTFLFMLTSSGIEKK
SGRLSGILDNRELFSILNITATETRDSAIYLCAVE
>V92RF-ADFV01192049.1-trav |(617, 918)|2.55445744717|(0.968,0.949,0.776)|1
SGMAQTVTQSQPEMSVQEAETVTLSCTYDTTESDYYLFWYKLPPSRQMILIIRQEAYKQQ
NATENHFSVNFQKAAKSFSLKISDSQLGDTAMYFCAFM
>V93RF-ADFV01192049.1-trav |(9724, 10024)|2.95870048487|(0.995,0.980,0.985)|1
FSMAQTVTQSQPEMSVQEAETVTLSCTYDTTESDYYLFWYKQPPSRQMILIIRQEAYKQQ
NATENRFSVNFQKAAKSFSLKISDSQLGDTAMYFCAYR
>V94RF-ADFV01192050.1-trav |(14951, 15239)|2.92225114014|(0.980,0.950,0.997)|1
LSGELKVGQNPPFLSTQEGKNYTIYCNYSTISDRLYWYRQDPGKSLESLFVLLSSGAVKQ
EGRLMASLDTKARLSTLHITAAVHDLSATYFCAV
>V95RF-ADFV01192052.1-trav |(11470, 11756)|1.77357312909|(0.577,0.591,0.826)|1
VSDAKNEVEQSPQDLTAQEGEFITINCSYSIGITALQWLQQHQGGGIVSLFMLSSGKKKN
GRLMATINIQEKHSSLHITASQPRDSAIYICAV
>V96RF-ADFV01046571.1-trgv |(4061, 4374)|2.94042463332|(0.980,0.995,0.967)|-1
SQKSSNLEGRTKSVTRPTGSSAEITCDLTVTDTFYIHWYLHQEGKAPQRLLYYDVSDSRD
VLESGLSQVKYYTHTPRRWSWILILRNLIENDSGVYYCASWG
>V97RF-ADFV01046571.1-trgv |(18717, 19030)|1.55447487745|(0.849,0.638,0.543)|-1
SQKSFNLEGRTKSVTGPTGSLAVITCDLPVENAVYIHWYLHQEGKAPRRLLYYVFSTSKV
VLESGISLGKYHTYASTRRSFKFILENLIEHDSGVYYCATWD
>V98RF-ADFV01046573.1-trgv |(27483, 27793)|2.33725511493|(0.914,0.841,0.730)|-1
SQKSSNLEGRTKSVTRPTGSSAEITCDLPGASTLYIHWYLHQEGKAPQRLLYYEPYYFRV
VLESGITPGKYDTASTRSSWNLRLQNLIEKDSGVYYCATWD
>V99RF-ADFV01062096.1-trbv |(8832, 9126)|1.82449604771|(0.758,0.734,0.527)|-1
VRSQTIHQWPATLVQPVGSPLSLECTVEGTSNPNLYWYRQAAGRGLQLLFYSIGVDQISS
EVPQNLSASRPQDRQFILSSKKLLLSDSGFYLCAWS
>V100RF-ADFV01106195.1-igkv |(132520, 132838)|2.5222376291|(0.999,0.748,0.998)|-1
AYGDIVMTQSPDSLAVSLGERVTINCKSSQSVLYSSNNKNYLNWYQQKPGQAPKLLIYWA
STRESGVPDRFSGSGSGTDFTLTISSLQAEDVAVYYCQQSYSTP
>V101RF-ADFV01106214.1-igkv |(93146, 93461)|2.69845883339|(0.975,0.822,0.992)|-1
TSGDIVMTQTPLSLPVTPGEPTSISCRSSQSLLHSDGCTYLAWYLQKPGQSPQLLIYAVS
YRASGVPDRFSGSGSGTDFTLKISRVEAEDVGVYYCMQALQAP
>V102RF-ADFV01106214.1-igkv |(102002, 102302)|2.99899600001|(1.000,1.000,0.999)|-1
ARCDIQMTQSPSSLSASVGDSVTITCRASQGISNWLAWYQQKPGKAPKLLIYKASSLQSG
IPSRFSGSGSGTTYTLTISSLQPEDFATYYCQQSYSTP
>V103RF-ADFV01131933.1-ighv |(14064, 14373)|2.96830128432|(0.995,0.975,1.000)|-1
AHSQVQLVQSGAEVKKPGASVKVSCKASGYTFTSYNMYWVRQAPGQGLEWMGVINPSSGG
TSYAQKFQGRVTMTRDTSISTAYMELSSLRSEDTATYYCAR
>V104RF-ADFV01131938.1-ighv |(1713, 2022)|2.81919856051|(0.954,0.959,0.913)|-1
AHSQVQLVQSGAEVKKPGTSVKVSCKASGYTFTSYAMNWARQAPGQRLEWMGWINTNTGN
PTYAQGFKERFVFSMDTSVSTAYLQISSLKAEDTAVYYCAR
>V105RF-ADFV01131939.1-ighv |(1427, 1736)|2.81919856051|(0.954,0.959,0.913)|-1
AHSQVQLVQSGAEVKKPGTSVKVSCKASGYTFTSYAMNWARQAPGQRLEWMGWINTNTGN
PTYAQGFKERFVFSMDTSVSTAYLQISSLKAEDTAVYYCAR
>V106RF-ADFV01131940.1-ighv |(4183, 4492)|3.0|(1.000,1.000,1.000)|-1
VQCDVQLVESGGGLAQPGGSLRLSCAASGFTFSNYYMSWVRQAPGKGLEWVSYISGDSSY
IYYADSVKGRFTISRDNAKNSLYLQMNSLRAEDTAVYYCTR
>V107RF-ADFV01131940.1-ighv |(12421, 12735)|2.60586429694|(0.967,0.811,0.927)|-1
VLSQVTLKESGPTLVKPTQTLTLTCTFSGFSLSTSGVGVGWIRQPPGKALEWLARIDWDD
DKYYSTSLKTRLTISKDTSKNQVVLTMTNMDPVDTATYYCARR
>V108RF-ADFV01131940.1-ighv |(27838, 28144)|2.6281253139|(0.994,1.000,0.789)|-1
VLSQVQLQESGPGLVKPSETLSLTCAVSGGSISGYYWSWIRQPPGKGLEWIGSIDSSGSK
YLNPSLKSRVTMSADTSKNQFSLKLSSVTAADTAVYYCAR
>V109RF-ADFV01131944.1-ighv |(5787, 6101)|2.99698000014|(1.000,0.999,0.998)|-1
VQCAVQLVESGGGLVQPGGSLRLSCAASGFTFSDYYMSWVRQAPGKGLEWVAVIRNKANG
GTTEYAASVKGRFTISRDDSKSIAYLQMNSLKTEDTAVYYCAE
>V110RF-ADFV01131946.1-ighv |(2041, 2350)|2.95966884009|(0.992,0.995,0.974)|-1
AHSEVQLVQSGAEVKKPGATVKISCKVSGYTFTSYYMHWVQQAPGKGLEWMGGVDPEGGE
TIYAEKFQGRVTITADTSTDTAYMELSSLRSEDTAVYYCAR
>V111RF-ADFV01131948.1-ighv |(1585, 1907)|2.51496471237|(0.920,0.763,0.926)|-1
VLSQVTLKESGPALVKPTETLTLTCTVSGFSLSTSGMGMSWIRQPPGKALEWLAHIFSND
QKSYSTSLKSRLTISKDTSKSQVVLAMTNMDPVDTATYYCARRAQ
>V112RF-ADFV01131950.1-ighv |(11086, 11386)|3.0|(1.000,1.000,1.000)|-1
QCEVQLVESGGSLVQPGGSLRLSCAASGFTFSDYYMHWVRQAPGKGLEWVSEITNSSTYY
ADSVKGRFTISRDNAKNTLYLQMNSLRAEDTAVYYCAK
>V113RF-ADFV01131950.1-ighv |(21617, 21923)|2.99496000066|(0.997,1.000,0.998)|-1
VLSQVQLQESGPGLVKPSETLSLTCAVSGGSISGYYWSWIRQPPGKGLEWIGYIYSSGST
NYNPSLKSRVTMSVDTSKNQFSLKLSSVTAEDTAVYYCAR
>V114RF-ADFV01131951.1-ighv |(9601, 9910)|2.99899600001|(1.000,0.999,1.000)|-1
VQCEVQLVESGGGLVQPGGSLRLSCAASGFTFSSYDMNWVRQAPGKGLEWVSYISSGGGT
IYYADSVKGRFTISRDNAKNSLYLQMNSLRAEDTAVYYCAK
>V115RF-ADFV01131951.1-ighv |(17955, 18261)|2.6984110343|(0.966,0.883,0.896)|-1
VLSQVQLQQWSAGPVKPSETLSLTCAVYGGSISGYYWGWIRQPPGKGLEWIGLIDSSGST
NYNPSLRSRVTMSVDTSKNQFSLKLSSVTAADTAVYYCAR
>V116RF-ADFV01131954.1-ighv |(4903, 5218)|2.99899600001|(1.000,1.000,0.999)|-1
VQCEVQLVESGGGLVQPGGSLRLSCAASGFTFSDYAMSWVRQAPGKGLEWVGFIRSKAYG
GTTEYAASVKGRFTISRDDSKSVAYLQMNSLKTEDTAVYYCTR
>V117RF-ADFV01131956.1-ighv |(7476, 7785)|3.0|(1.000,1.000,1.000)|-1
VQCEVQLVESGGGLVQPGASLKLSCAASGFTFSSYGMHWVRQAPGKGLEWVSSISTSSSY
IYYADSVKGRFTISRDNSKNTLYLQMNSLRAEDTAVYYCAR
>V118RF-ADFV01131956.1-ighv |(12171, 12495)|2.05923421359|(0.967,0.939,0.590)|-1
CAEVQLVQSGAEVKRPGESLRISCKGSGYSFTSYWISWVRQMPGKGLEWMGMIYPSDSDT
RYSPSFQGHVTISADKSISTAYLQWSSLKASDTATYYCARHTVRET
>V119RF-ADFV01131957.1-ighv |(4591, 4897)|2.74788727276|(0.964,0.853,0.980)|-1
VLSQVQLQESGPGLVKLSETLSLTCAVSGGSISGYYWSWIGQPAGKGLEWIGYIHSSGST
NYNPSLKSRVTMSADTSKNQFSLKLSSVTAEDTAVYYCAR
>V120RF-ADFV01131958.1-ighv |(4025, 4334)|2.97953608204|(0.998,0.988,0.994)|-1
AHSQVQLVQSGPEVKKPGASVKVSCKASGYTFTSSAMQWVRQAPGQGLEWMGWIIVGNGN
TNYAQKFQGRVTITRDTSTSTAYMELSSLRSEDTAVYYCAT
>V121RF-ADFV01131959.1-ighv |(269, 578)|2.84227949387|(0.997,0.958,0.918)|-1
AHSEVQLVQSGAEVKKPGATVKISCKASGYTFTSSYMHWVQQAPGKGLEWMGRVDPEDGE
TKYAEKFQGRVTITADTSTDTAYMELSSLRSEDTAVYYCAT
>V122RF-ADFV01131961.1-ighv |(38, 353)|3.0|(1.000,1.000,1.000)|-1
VQCEVQLVESGGGLVQPGGSLRLSCAASGFTFSNYWMHSVRQAPGKGLEWVGRIKNKADG
GTAEYAASVKGRFTISRDDSKNTLYLQMNSLKTEDTAVYYCTR
>V123RF-ADFV01131961.1-ighv |(8796, 9087)|1.95996543864|(0.985,0.537,0.990)|-1
AAVESGGGLVQPGGSLRLSCVASGFTFSNYAMGWVRQAPGKGLEWVSSISGSGSTYYPDS
VKGRFTISRDNAKNTLYLQMNSLRAEDTAVYYCAK
>V124RF-ADFV01131961.1-ighv |(20094, 20382)|1.8989313537|(0.647,0.760,0.567)|-1
VQCEVQLVESGGGLVQPGGSLRLSCAASGFTFSNNYMHWVRQAPGKGLEWVGLIRNKADG
GTTDYAASVKGRFTISRDDSKSIAYLQMNSLKTE
>V125RF-ADFV01131961.1-ighv |(37937, 38246)|3.0|(1.000,1.000,1.000)|-1
VQCEVQLVESGGGLVQPGGSLRLSCAASGFTFSSYGMNWVRQAPGKGLEWVSYISSGGGT
IYYADSVKGRFTISRDNAKNSLYLQMNSLRAEDTAVYYCTR
>V126RF-ADFV01131961.1-ighv |(48794, 49103)|2.66603996315|(0.970,1.000,0.804)|-1
VQSQVQLVQSGAEVKKPGSSVKVSCKASGGTFSSYAISWVRQAPGQGLEWMGVIIPAADL
TNYAQKFQGRLTITADTSTSTAYMELSSLRSEDTAVYYCAR
>V127RF-ADFV01132915.1-iglv |(43582, 43891)|2.17374498998|(0.957,0.615,0.977)|-1
SWANFMLTQPHSVSGSVGQKVVISCARSSGSIGSYYVQWYQQRSGSAPTTVIYKDNQRPT
GAPDRFSGSIDSSSNSASLTISGLETEDEADYYCQSYDSSN
>V128RF-ADFV01132915.1-iglv |(73010, 73322)|2.09974451167|(0.981,0.839,0.673)|-1
SWAEVVFTQPHSVSGSPGQTVTISCTRSSGSIASRYVHWYQQRPGSAPTTVIYDDVPRPS
GVPDRFSGSIDSSSNSASLTISGLKSEDEADYYCQSADDSYN
>V129RF-ADFV01132915.1-igkv |(87286, 87596)|1.91340778985|(0.671,0.754,0.562)|-1
SLSQPVLTQSPSASASPGASVKLTCTLSSGHSSYTIAWHQQQPEKAPRYLMKLSSDGSHS
KGDGIPDRFSGSSSGAERYLTISNLQSEDEADYYCQTWGSG
>V130RF-ADFV01132915.1-iglv |(116005, 116315)|2.63619761373|(0.939,0.938,0.817)|-1
SWAEVVFTQPHSVSGSPGQTVTISCTRSSGSIASNYVHWYQQRPDSAPTTVIYSDDQRPS
GVPDPFSGSIDSSSNSASLTISGLKSEDEADYYCQSYDSSS
>V131RF-ADFV01132918.1-iglv |(49559, 49868)|2.89892102226|(0.942,0.976,0.998)|-1
SWAQSVLTQPPSVSGTPGQRVTISCSGSSSNIGSNNVHWDQQLPGTAPKLLIYYNDQRPS
GVPDRFSGSKSGTSASLAITGLRSEDEADYYCEAWDDSLSG
>V132RF-ADFV01132961.1-igkv |(18470, 18770)|2.97568883957|(0.999,0.981,0.997)|-1
ARCDIQMTQSPSSLSVSVGDRVTITCRASQGISNELAWYQQKPGQAPMLLIYAASSLQTG
VPSRFSGSGSGTDYTLTISSLQPEDVATYYCLQDYTTP
>V133RF-ADFV01132961.1-igkv |(54096, 54396)|2.51445585936|(0.909,0.914,0.768)|-1
ATCDIQMTQSPSSLSASVGDRVTITCRASQGINNELAWYQQKPWKDPKLLIYSASNLLMG
VPSQFSGSGPGTDYTLTISSLQPEDAATYYCQWDYNTP
>V134RF-ADFV01132961.1-igkv |(60846, 61149)|2.27701582537|(0.981,0.732,0.850)|-1
IVMTQTPLSLPFTPGEAASISCRSSQSLLDSDGYTYLDWYLQKPGQSPQLLIYAVSNRAS
GVPDRFSGSGSGTDFTLKISRVEAEDVGVYYCLQALQAP
>V135RF-ADFV01132961.1-igkv |(93218, 93536)|2.89034245428|(0.979,0.931,0.990)|-1
STGDIVMTQTPLFLSITLGEPASISCRSSQSLFYSDDQNIYLDWYLQKPGQSPQLLIYFV
SYRASGVPDRFSGSGSGTDFILKISRLEAEDVGVYYCMQRIEFP
>V136RF-ADFV01132961.1-igkv |(104510, 104810)|2.98880001921|(0.999,0.998,0.992)|-1
ARCDMQMTQSPSSLSASVGDTVTITCRASQSISSYLNWYQQKPGKIPKLLIYAASTLQSG
VPSRFSGSGSGTDFTVTISSVQPEDFATYYCQHGYGTP
>V137RF-ADFV01132961.1-igkv |(146778, 147093)|2.98575601537|(0.999,0.993,0.994)|-1
SSGDIVMTQTPLSLSITPGEPASISCRSSQSLRYSDGNTYLYWYLQKPGQSPQLLIYRVS
NRFSGVPDRFSGSGSGTDFTLKISRVEAEDVGVYYCMQDLQAP
>V138RF-ADFV01132961.1-igkv |(157570, 157870)|2.9599362071|(0.973,0.994,0.997)|-1
ARCAIQMTQSPSSLSASVGDRVTITCRTSQGISNWIAWYQQKPGKAPKHLIYGASNLQTG
VPSRFSESGSGTDYTLTVSSLQPEDSTTYYCQQYDIFP
>V139RF-ADFV01132961.1-igkv |(167109, 167423)|2.38449583025|(0.984,0.756,0.877)|-1
SSGDVVMTQTPLSLPVTPGEPASISCRSSQSLLHSNGNTYLHWYLQKPGQSPQLLIYKVS
NRASEIPDRFSGSGSGTDFTLKISRVEAEDVGVYYCMQSTKVS
>V140RF-ADFV01132961.1-igkv |(188116, 188416)|2.97087023728|(0.998,1.000,0.975)|-1
IRCAIQMTQSPSSLSASVGDRVTITCRASQGISNYLNWYQQKPGKAPKLLIYRASSLETG
VPSRFSGSGSGTDFALTISSLQPEDIATYYCLQYDNLP
>V141RF-ADFV01132961.1-igkv |(214992, 215307)|2.20095712233|(0.893,0.703,0.785)|-1
SSGDVVMTQSPLSLPVTPGQPASISCRSSQSLVHSDGKTYLYWFQQRPGQPPRRLIYQVS
NRDSGVPDRFIGSGAGTDFTLKISRVEAEDVGVYYCMQGTQFP
>V142RF-ADFV01132961.1-igkv |(225521, 225836)|2.73606956251|(0.975,0.892,0.912)|-1
SSGDIVMTQTPLSLSITPGEPASISCRSSQSLRHSNGYTYLDWYLQKPGQSPQLLIYLGS
NRASGVPDRFSGSGSGTDFTLKISRVEAEDVGIYYCMQGIQLP
>V143RF-ADFV01132961.1-igkv |(238675, 238990)|2.52334557759|(0.959,0.785,0.905)|-1
SSGNIVLTQSPLSLPVTPGEPASISCRSSQSLLHSNGYNYLYWYLQKPGQSPQLLIYLGS
NRASGVPDRFSGSGSGTDFTLKISRVKAEDVGVYYCMQTLQTP
>V144RF-ADFV01132961.1-igkv |(246969, 247267)|2.95897652411|(0.992,0.992,0.976)|-1
TRCDIQMTQSPSSLSASVGDRVTITCRASQSISKWLAWYQQKPGKVPKLLIYAASTLQSG
VPSRLSGSGSGTDFTLTISSLQPEDVATYYCQKHDSA
>V145RF-ADFV01132961.1-igkv |(265341, 265656)|1.812195603|(0.934,0.621,0.732)|-1
SSGDIVMTQTPLSLPVTPGQPASISCRSSQSLVHSNGNTYLNWIQQRLGQPPRLLIYKVS
NRASGVPERFSGSGAGTDFTLKISRVEAEDVGVYYCLQGTQFP
>V146RF-ADFV01143437.1-ighv |(651, 966)|2.99799600001|(0.999,1.000,0.999)|-1
VQCEVQLVESGGSLVQPGGSLRLSCAASGFTFSDYYMHWVRQAPGKGLEWVGRIKNKAGG
GTAEYAASVKGRFTISRDDSKNTLYLQMNSLKTEDTAVYYCTR
>V147RF-ADFV01143437.1-ighv |(3728, 4035)|1.81968026027|(0.873,0.509,0.851)|-1
WGRLIKALGGSLRLSCAASGFTFSSYAMHWVRQAPGKGLEWVSVISTSGGTILYTDSVKG
RFTVSRDNAQNSLYLQMNSLRAEDTAVYYCVKDTVSRSQC
>V148RF-ADFV01192057.1-trdv |(25030, 25336)|2.45590837717|(0.809,0.841,0.810)|-1
RGMLCDKVTQSSPDQTVASGSEVVLLCTYDTVYSNPDLFWFRIRPDYSFQFVFYGDDSRS
QAADFTQGRFSVKHILTQKAFHLVISPVRIEDSATYYCAL
>V0RF-AJFE01000016.1-trdv |(1583, 1883)|2.10119110876|(0.879,0.678,0.754)|1
SSVAQKVTQAQSSVSMPVRKAVTLNCLHEASWWSYYIFWYKQLPSKEMIFLIRQGSDELN
AKSGRYSVNFKKAAKSVTLTISALQLEDSAKYFCALWE
>V1RF-AJFE01003265.1-ighv |(14098, 14407)|2.98894800078|(0.996,0.994,0.999)|1
VQCEVQLVESGGGLVQPGGSLRLSCAASGFTFSSYWMHWVRQAPGKGLVWVSRINSDGSS
TSYADSLKGQFTISRDNAKNTLYLQMNSLRAEDMAVYYCTR
>V2RF-AJFE01011107.1-ighv |(15076, 15385)|2.68278594627|(0.974,0.963,0.828)|1
TYSQVQLVQSGHEVKQPGASVKVSCKASGYSFTTYGMNWVRQAPGQGLEWMGWFNTYTGN
PTYAQGFTGRFVFSMDTSVGTAYLQISSLKAEDTAMYYCAR
>V3RF-AJFE01011110.1-ighv |(45852, 46161)|3.0|(1.000,1.000,1.000)|1
VQCEVQLLESGGGLVQPGGSLRLSCAASGFTFSSYWMHWVRQAPGKGLEWVSRINSDGSS
TSYADSVKGRFTISRDNAKNTLYLQMNSLRAEDTAVYYCTR
>V4RF-AJFE01011110.1-ighv |(53572, 53887)|2.99899600001|(1.000,1.000,0.999)|1
VQCEVQLVESGGGLVQPGGSLRLSCAASGFTFSGSAMHWVRQASGKGLEWVGRIRSKANS
YATAYAASVKGRFTISRDDSKNKAYLQMNSLKTEDTAVYYCTT
>V5RF-AJFE01011111.1-ighv |(20882, 21191)|2.7029151854|(0.979,0.981,0.829)|1
VQSQVQLVQSGAEVKKPGSSVKVSCKVSGGTFSSYAISWVRQAPGQGLEWMGVIIPILGT
ANYAQKFQGRVTITADESTSTAYMELSSLRSEDTAVYYCAT
>V6RF-AJFE01011113.1-ighv |(30008, 30314)|3.0|(1.000,1.000,1.000)|1
VQCEVQLVESGGGLVQPGGSLRLSCAASGFTFSSYAMHWVRQAPGKGLEWVSLIYSGDST
YYADSVKGRFTISRDNSKNTLYLQMGSLRAEDTAVYYCAR
>V7RF-AJFE01011588.1-igkv |(6066, 6365)|2.99496000066|(0.999,1.000,0.996)|1
ARCDIQVTQSPSSLSASVGDRVTITCRASQGISNGLSWYQQKPGQAPTLLIYAASSLQSG
IPSRFSGSGSGTDFTLTISSLQPEDVATYYCLQDYTTH
>V8RF-AJFE01011664.1-trav |(6239, 6548)|1.86671541733|(0.883,0.912,0.507)|1
TIMYLVIGTAGQSLEQPSEVTAVEGAIVQINCTYQTSGFYGLSWYQQHDGGAPTFLSYNA
LDGLEETGRFSSFLSRSDSYGYLLLQDLQMKDSASYFCAVR
>V9RF-AJFE01012232.1-igkv |(670, 988)|2.70831013128|(0.989,0.827,0.992)|1
SSGDIVMTQAPLSLPITPGEPASISCRSSQSLLDSDDGNTYLDWYLQKPGQSPQLLIYTL
SYRASGVPDRFSGSGSGTDFTLKISRVEAEDVGVYYCMQHIEFP
>V10RF-AJFE01012232.1-igkv |(11186, 11479)|2.99696400065|(1.000,1.000,0.997)|1
ARCDIQMTQSPSSLSASVGDRVTITCRASQSISNYLSWYQQKPGKAPKLLIYYASTLQSG
VPSRFSGSGSGTDFTLTISSLQPEDFATYYCQHGYG
>V11RF-AJFE01012232.1-igkv |(33464, 33764)|2.99174403277|(1.000,0.992,1.000)|1
ARCDIQLTQSPSSLSASVGDRVTITCRASQGISSYLNWYQQKPGKVPKLLIYSASNLQSG
VPSRFSGSGSGTDFTLTISSLQPEDVATYYCQRTYNAP
>V12RF-AJFE01012232.1-igkv |(62717, 63017)|2.99385601037|(1.000,0.994,1.000)|1
ARCDIRMTQSPSSLSASVGDRVTITCQASQDISNYLNWYQQKPGKAPKLLIYDASNLETG
VPSRFSGSGSGTDFTFTISSLQPEDIATYYCQQYDNLP
>V13RF-AJFE01012234.1-igkv |(5885, 6200)|2.52611886864|(0.948,0.871,0.807)|1
SSGDVVMTQSPRSLPVTLGQPASISCRSSQSLVYSDGNTYLSWIQQRPGQPPRLLIYKVS
NRDSGVPDRFSGSGAGTDFTLKISRVEAEDVGVYYCVQGIQLP
>V14RF-AJFE01012234.1-igkv |(16459, 16774)|2.94790741148|(0.997,0.989,0.966)|1
SSADIVMTQTPLSLSVTPGQPASISCKSSQSLLHSDGNTYLYWYLQKPGQSPQLLIYRVS
NRASGVPDRFSGSGSGTDFTLKISRVEAEDVGVYYCMQGIQLP
>V15RF-AJFE01012234.1-igkv |(28936, 29251)|2.71240530194|(0.994,0.827,0.997)|1
SSGDIVMTQSPLSLPVTPGEPASISCRSSQSLLHSNRYNYLDWYLQKPGQSPQLLIYLGS
NRASGVPDRFSGSGSGTDFTLKISRVEAEDVGVYYCMQALQTP
>V16RF-AJFE01012235.1-igkv |(6765, 7067)|2.982900005|(0.996,0.996,0.991)|1
SSGDIVMTQTPLSSPVTLGQPASISCRSSQSLVHSDGNTYLSWLQQRPGQPPRLLIYKVS
NRFSGVPDRFSGSGAGTDFTLKISRVEAEDVGVYYCTQA
>V17RF-AJFE01012235.1-igkv |(23412, 23710)|2.39834519042|(0.996,0.700,0.998)|1
SRGEIVLTQSPDFQSVPPKEKVTITCRASQSIGSSLHWYQQKPGQSPKLLIKYASQSISG
VPSRFSGSGSGTDFTLTINSLEAEDAATYYCQQSSSL
>V18RF-AJFE01012236.1-igkv |(7268, 7564)|2.94937470465|(0.989,0.965,0.998)|1
TTGEIVLMQSSATLSLSPGERATLSCRASQSVSSSYLAWYQQKPGQAPRLLIYDASTRAT
GIPDRFSGSGSGTDFTLTISRLEPEDFAVYYCQQYGS
>V19RF-AJFE01012238.1-igkv |(1220, 1535)|2.54673192497|(0.971,0.769,0.958)|1
SSGDIVMTQNPPSLPVNPGEPASISCRSSQSLLHSNGYTYLHWYLQKPGQSPQLLIYRVS
NRFSGIPDRFSGSGSGSDFTLKISWVEAEDVGVYYCMQATQFP
>V20RF-AJFE01012238.1-igkv |(18126, 18418)|2.39669442025|(0.895,0.712,0.917)|1
SRGDVVMTQSPAFLSVTPGEKVTITCQASEGIGNYLYWYQQKPDQAPKLLIKYASQSISG
VPSRFSGSGSGTDFTFTISSLEAEDAATYYRQQGN
>V21RF-AJFE01012238.1-igkv |(29982, 30282)|2.98880001921|(0.999,0.992,0.998)|1
ARCDIQMTQSPSSLSASVGDRVTITCRASQGISNYLAWFQQKPGKVPKRLIYAASSLQSG
VPSRFSGSGSGTEFTLTISSLQPEDFATYYCLQHNSYP
>V22RF-AJFE01012238.1-igkv |(62062, 62362)|2.52774717894|(0.944,0.996,0.745)|1
TTGEIVLTQSPATLSLSPGERATLSCRASQSVSSYLAWYQQKPGQAPRLLIYGASNRATG
IPARFSGSGSRTDFTLTISSVEPEDFAVYYCQQYNNQP
>V23RF-AJFE01012245.1-igkv |(2610, 2910)|2.99280401921|(1.000,0.993,1.000)|1
ARCAIQLTQSPSSLSASVGDRVTITCRASQGISNRLNWYQQKPGKAPKLLIYDASSLESG
VPSRFSGSGSGTDFTLTISSLQPEDFATYYCQQFNSYP
>V24RF-AJFE01012249.1-igkv |(2485, 2785)|2.98341612211|(1.000,0.989,0.995)|1
TTREIVLTQSPATLSLSPGEKATLSCRASQSVSSYLAWYQQKPGQAPRLLIYDASNRATG
IPARFSGSGSGTDFTLTISSLEPEDFAVYYCQQRSNWH
>V25RF-AJFE01016082.1-igkv |(1156, 1468)|2.42974239338|(0.829,0.997,0.741)|1
CNGDIVLTQSPASLAVSPGQRATITCRASESVSFLGINLIHWYQQKPGQPPKLLIYQASN
KDTGVPAGFSSSGSGTDFTLTINPVEANDTANYYCLQSKNFP
>V26RF-AJFE01024273.1-trdv |(100475, 100781)|2.92402032645|(0.982,0.968,0.975)|1
RGMLCDKVTQSSPDQTVASGSEVVLLCTYDAVYSNPDLFWYRIRPDYSFQFVFYGDNSRS
QAADFTQGRFSVKHILTQKAFHLVISPVRTEDSATYYCAF
>V27RF-AJFE01038664.1-trgv |(28742, 29055)|2.85973801777|(0.997,0.940,0.946)|1
SQKSSNLEGRTKSVTRETRSSAEITCDLTVTNTFYIHWYLHQEGKAPQRLLYYDVSTARD
VLESGLSPGKYYTHTPRRWSWILRLQNLIENDSGVYYCATWD
>V28RF-AJFE01038665.1-trgv |(1085, 1398)|2.95870048487|(0.995,0.980,0.985)|1
SQKSSNLEGRTKSVIRQTGSSAEITCDLDGGSTGYIHWYLHQEGKAPQRLLYYDSYTSRV
VLESGISPGKYDTYGSTRKNLRLILRNLIENDSGVYYCATWD
>V29RF-AJFE01038666.1-trgv |(1901, 2214)|2.92690924071|(0.999,0.983,0.954)|1
SQKSSNLEGRMKSVTRPTGSSAEITCDLTVINAVYIHWYLHQEGKSPQRLLYYDVSNSRD
VLESGLSPGKYYTHTPRRWSWILRLQNLIENDSGVYYCATWD
>V30RF-AJFE01038666.1-trav |(16565, 16874)|1.69580713845|(0.544,0.614,0.558)|1
RMKSVTRPTGSSAVITCDLPVENAGYTHWYLHQEGKAPQRLLYYDSYNSRVVLESGISQE
KYHTYASTGKSLKFILENLIERDSGVYYCATWDRHSDSDLC
>V31RF-AJFE01038666.1-trgv |(31023, 31327)|1.63526746138|(0.745,0.592,0.541)|1
HLEQPQISSTKTLSKTARLECVVSGVTISATSVYWYRERPGEVIQFLVSISYDGTVRKES
SIPSGKFEVDRIPETSTSTLTIHNVEKQDIATYYCALWE
>V32RF-AJFE01039607.1-trbv |(115731, 116041)|1.80464253497|(0.651,0.649,0.547)|1
SMDTGITQTPKYLVTAMGSKRTMKREHLRHDSMYWYRQKAKKSLEFMFYYNCKEFIENKT
VPNHFTPECPDSSRLYLHVVALQQEDSAVYLCTSSQDTALQ
>V33RF-AJFE01039607.1-trbv |(117721, 118021)|2.82020368021|(0.974,0.992,0.886)|1
LTEPEVTQTPSHQVTQMGQEVILRCVPISNHLYFYWYRQILGQKVEFLVSFYNNEISEKS
EIFDDQFSVERPDGSNFTLKIWSTKLEDSAMYFCASSE
>V34RF-AJFE01039607.1-trbv |(129949, 130246)|2.94591237717|(0.994,0.994,0.962)|1
PIDTEVTQTPKHLVMGMTNKKSLKCEQHMGHRAMYWYKQKAKKPPELMFVYSYEKLSINE
SVPSRFSPECPNSSLLNLHLHALQPEDSALYLCASSQ
>V35RF-AJFE01039607.1-trbv |(137829, 138125)|2.92993047006|(0.992,0.953,0.991)|1
PVEAGVTQTPRYLIKARGQQVTLSCSPISGHRSVSWYQQTPGQGLQFLFEYFSETQRNKG
NFPGRFSGRQFSNSRSEMNVSTLELGDSALYLCASSL
>V36RF-AJFE01039608.1-trbv |(1218, 1515)|2.99593600205|(1.000,1.000,0.996)|1
PVNAGVTQTPKFQVLKTGQSMTLQCAQDMNHNSMYWYRQDPGMGLRLIYYSVGEGTTDKG
EVPDGYNVSRLNKREFSLRLESAAPSQTSVYFCASSE
>V37RF-AJFE01039609.1-trbv |(5245, 5558)|2.88794173299|(0.996,0.998,0.918)|1
PMEMGVTQTPRHLVMGMTNKKSLKCEQHLGHNAMYWYKQSAKKPLELMFVYNFKEQTENN
SVPSRFSPECPNSSHLFLHLHALQPEDSALYLCASSQDTALQ
>V38RF-AJFE01045032.1-ighv |(257, 569)|2.49771258092|(0.997,0.966,0.752)|1
VLSQVQLQQWGPGLVKPSETLSLTCAVYGGSISSSGYYWSWIRQPPGKGLEWIGEINHSG
STNYNPSLKSRVTISVDTSKNQFSLKLSSVTAADTAVYYCAR
>V39RF-AJFE01045035.1-ighv |(280, 602)|2.21738298974|(0.766,0.663,0.916)|1
VLSQVTLKESGPVLVKPTETLTLTCTISGFSLSNAGMGVSWIRQPPGKALEWLAHIFWND
EKSYSTSLKSRLTISKDTSKSQVVLTMTNMDPVDTATYYCTRRAQ
>V40RF-AJFE01045037.1-ighv |(4711, 5020)|2.82685164207|(0.970,0.895,0.985)|1
THAQVQLVQSGAEVKKPGATVKISCKASGYTLTELSMHWVRQAPGKGLEWMGGFDPEDGE
TIYAQKFQGRVTMTEDTSTDTAYMELSSLRSEDTAVYYCAT
>V41RF-AJFE01045037.1-ighv |(12790, 13099)|2.99085601037|(0.999,0.993,0.999)|1
VQCEVQLVESGGGLVKPGGSLRLSCAASGFTFSNYYMHWVRQAPEKGLEWVSTISGSGGS
TWYPDSVKGRFTISRDNSKNTLYLQMNSLRAEDTAVYYCAR
>V42RF-AJFE01045037.1-ighv |(23646, 23958)|2.98867205249|(0.999,1.000,0.990)|1
VQCEVQLVESGGGLVKPGGSLRLSCAASGFTFSSYSMNWVRQAPGKGLEWVAYISSPSGS
STYYADSVKGRFTISRDNSKNTLYLQMNSLRAEDTAVYYCAR
>V43RF-AJFE01045041.1-ighv |(1266, 1575)|2.99799600001|(0.999,1.000,0.999)|1
VQCEVQLVESGGALVKPGGSLRLSCAASGFTFSSYGMHWVRQAPGKGLEWVSYISYDSSY
IYYADSVKGRFTISRDNAKNSLYLQMNSLRAEDTAVYYCAR
>V44RF-AJFE01045048.1-ighv |(1386, 1695)|2.99593600205|(1.000,1.000,0.996)|1
VQCEVQLVESGGGLVQPGGSLRLSCAASGFTFDDYGMSWVRQAPGKGLEWVSLISWDGGS
TYYADSVKGRFTISRDNSKNSLYLQMNSLRAEDTALYYCAR
>V45RF-AJFE01045051.1-ighv |(2850, 3156)|2.98470402421|(0.999,0.992,0.994)|1
VLSQLQLQESGPGLVKPSETLSLTCTVSGGSISSYYWSWIRQPPGKGLEWIGNIYYSGSA
YYNPSLKSRVTISVDTSKNQFSLKLSSVTAADTAVYYCAR
>V46RF-AJFE01045051.1-ighv |(17267, 17573)|3.0|(1.000,1.000,1.000)|1
VQCEVQLVESGGGLVQPGGSLRLSCAASGFTVSSYHMSWVRQAPGKGLEWVSVIYSGGST
YYADSVKGRFTISRDNSKNTLYLQMNSLRAEDTAVYYCAR
>V47RF-AJFE01045051.1-ighv |(31190, 31497)|2.67264509707|(0.992,0.988,0.813)|1
VCAEVQLVQSGAEVKKPGESLKISCKGSGYSFTSYWIGWVRQMPGKGLEWMGIIYPGDSD
TRYSPSFQGQVTISADKSISTAYLQWSSLKASDTAMYYCA
>V48RF-AJFE01045051.1-ighv |(52919, 53234)|2.99594800078|(0.997,0.999,1.000)|1
VQCEVQLVESGGGLVQPGRSLRLSCTASGFTFGDYAMSWIRQAPGKGLEWVGFIRSKAYG
GTTEYAASVKGRFTISRDDSKSIAYLQMNGLKTEDTAVYYCTR
>V49RF-AJFE01045051.1-ighv |(68146, 68452)|2.06899806685|(0.986,0.576,0.997)|1
VQCEDQLVESGGGLVQPGGSLRPSCAASGFAFSSYVLHWVRRAPGKGLEWVSAIGTGGDT
YYADSVMGRFTISRDNAKKSLYLQMNSLIAEDMAVYYCAR
>V50RF-AJFE01045051.1-ighv |(75870, 76179)|2.9774040992|(0.987,0.997,0.994)|1
AHSQVQLVQSGAEVKKPGASVKVSCKASGYTFTSYTISWLRQAPGQGLEWMGVISPSDGS
TSYAQKFQGRVTMTRDTSTSTVYMELSSLRSEDTAVYYCAR
>V51RF-AJFE01045051.1-ighv |(79995, 80304)|2.98896000066|(0.997,0.998,0.994)|1
AYSQMQLVQSGAEVKKPGSSVKVSCKASGYTFTYRYLHWVRQAPGQALEWMGWITPYNGN
TNYAQKFQDRVTITRDRSMSTAYMELRSLRSEDSAVYYCAR
>V52RF-AJFE01045053.1-ighv |(1090, 1399)|2.68288365583|(0.913,0.848,0.942)|1
VQCEVQLVESGGGLVQPGGSLRLSCAASGFTFSNSDTNWVHQAPGKGLELVSGVSWNGSR
MHYADSVKGRFIISRDNSRNSLYLQTNSLRAEDTAVYYCVR
>V53RF-AJFE01069972.1-trav |(2006, 2315)|1.50158022027|(0.910,0.535,0.679)|1
TVMYLVLGTTGQNTDQPTEMTATEGAIVQINCTYQTSGFNGLFWYQQHAGEAPTFLSYNV
LDGLEEKGRFSLFLSRSKGYSYLLLKELQMKDSASYLCAVR
>V54RF-AJFE01069974.1-trav |(29012, 29309)|2.38910456739|(0.988,0.701,0.981)|1
GLRAQSVAQPEDQVKVAEGNPLTVKCTYSVSGNPYLFWYVQYPNRGLQFLLKYITGDNLV
KGSYGFEAEFNKSQTSFHLKKPSALVSDSALYFCAVR
>V55RF-AJFE01069975.1-trav |(15309, 15599)|2.99498000014|(0.998,0.997,1.000)|1
MTRGEDVEQSLFLSVREGDSSVINCTYTDSSSTYLYWYKQEPGAGLQLLTYIFSNMDMKQ
DQRLTVLLNKKDKHLSLRIADTQTGDSAIYFCAES
>V56RF-AJFE01069975.1-trav |(34873, 35161)|2.98793200206|(0.995,0.999,0.994)|1
VKSQKIEQNSEALNIQEGKTATLTCNYTNYSPAYLQWYRQDPGRGPVFLLLIRENEKEKR
KERLKVTFDTTLKQGVFHITASQPADSATYLCAL
>V57RF-AJFE01069975.1-trav |(49199, 49486)|2.95767605248|(0.983,0.983,0.992)|1
ANGENQVEHSPHFLGPQQGDVASMSCTYSVSRFNNLQWYRQNTGMGPKHLLSMYSAGYEK
QKGRLNAILLKNGSSLYITAVQPEDSATYFCAVD
>V58RF-AJFE01069975.1-trav |(63490, 63787)|2.11606375186|(0.892,0.838,0.633)|1
DARAQSVSQHNHHVILSEAASLELGCNYSYGGTVNLFWYVQYPGQHLQLLLKYFSGDPLV
KGIKGFEAEFIKSKFSFNLRKPSVQWSDTAEYFCAVN
>V59RF-AJFE01069975.1-trav |(77622, 77916)|2.98657605748|(0.991,0.996,1.000)|1
GINGDSVVQTEGQVLLSEGDSLIVNCSYETTQYPSLLWYVLYPGEGPQLLLKAMKANDNG
RNKGFEATYRKETTSFHLEKDSVQESDSAVYFCALS
>V60RF-AJFE01069975.1-trav |(91696, 91989)|2.98960803841|(0.992,0.999,0.999)|1
GSGKNQVEQSPQSLIILEGKNCTLQCNYTVSPFNNLRWYKQDTGRGPVSLTIMTFSENTK
SNGRYTATLDADTKKSSLHITASQLSDSASYICVVS
>V61RF-AJFE01069975.1-trav |(107426, 107714)|2.99593600205|(1.000,0.996,1.000)|1
VWSQRKEVEQDPGPFNVPEGATVAFNCTYSNSASQSFFWYRQDCRKEPKLLMSVYSSGNE
DGRFTAQLNRASQYISLLIRDSKLSDSATYLCAV
>V62RF-AJFE01069975.1-trav |(118638, 118935)|2.95328751647|(1.000,0.980,0.977)|1
TVRAQSVTQPDIHITVSEGASLELRCNYSYGATPSLFWYVQSPGQGLQLLLKYFSGDTLV
QGIKGFEAEFKRSQSSFNLRKPSVHWSDAAEYFCAVG
>V63RF-AJFE01069975.1-trav |(134910, 135200)|2.97780401921|(0.995,0.995,0.988)|1
VNGENVEQHPSTLSVQEGDGAVIKCTYSDSASNYFPWYKQELGKGPQLIIDIRSNMGEKK
DQRIAVTLNKTAKHFSLHITETQPEDSAVYFCAAS
>V64RF-AJFE01069975.1-trav |(154372, 154663)|2.99089600501|(0.999,0.998,0.994)|1
VWSQQKEVEQNSGPLSVPEGAIASLNCTYSDRRSQSFFWYRQYSGKSPELIMSIYSNGDE
EDGRFTAQLNKASQYVSLLIRDSQPSDSATYLCAV
>V65RF-AJFE01069975.1-trav |(160863, 161160)|2.96496800026|(0.987,0.989,0.989)|1
GTRAQSATQLDSHVSVSEGALVLLRCNYSSSVPPYLFWYVQYPNQGLQLLLKYTTGATLV
KGINGFEAEFKKSETSFHLTKPSAHVNDAAEYFCAVS
>V66RF-AJFE01069976.1-trav |(18238, 18531)|2.98899600001|(0.996,0.996,0.997)|1
VSRGESVGLHLPTLSVQEGDNSIINCAYSNSASDYFIWYKQESGKGPQFIIDIRSNMDKR
QGQRVTVLLNKTVKHLSLQIAATQPGDSAVYFCAEN
>V67RF-AJFE01069976.1-trav |(24122, 24425)|2.99289600501|(0.999,0.994,1.000)|1
PGIAQKITQTQPGMFVQEKEAVTLDCTYDTSDPSYGLFWYKQPSSGEMIFLIYQGSYDQQ
NATEGRYSLNFQKARKSANLVISASQLGDSAMYFCAVRE
>V68RF-AJFE01069976.1-trav |(40935, 41229)|3.0|(1.000,1.000,1.000)|1
RTRGDSVTQMEGPVTLSEEAFLTINCTYTATGYPSLFWYVQYPGEGLQLLLKATKADDKG
SNKGFEATYRKETTSFHLEKDSVQASDSAVYFCALS
>V69RF-AJFE01069976.1-trav |(65330, 65623)|2.98996000066|(0.996,0.999,0.995)|1
VWSQQKEVEQDPGPLSVPEGAIASLNCTYSNSAFQYFMWYRQYSRKGPELLMYTYSSGNK
EDGRFIAQVDTSSKYISLFIRDSQPSDSATYLCAMS
>V70RF-AJFE01069976.1-trav |(78780, 79071)|1.68070258178|(0.951,0.711,0.605)|1
GTRAQSVTQLDSQVFEEAPVELRCNYSSSVSVYLFWYVQYPNQGLQLLLKYLSGSTLVKG
INGFEAEFKKSETSFHLRKPSVHISDAAEYFCAVS
>V71RF-AJFE01069976.1-trav |(97788, 98075)|2.99385601037|(1.000,0.994,1.000)|1
VNSQQGEEDPQALSIQEGENAIMNCSYKTSINNLQWYRQNSGRGLVHLILIRSNEREKHS
GRLRVTLDTSKKSSSLLITASRAADTASYFCATD
>V72RF-AJFE01069976.1-trdv |(107857, 108160)|2.97580001921|(0.990,0.997,0.989)|1
SSMAQKVTQAQTEISVVEKEDVTLDCVYETRDTTYYLFWYKQPPSGELVFLIRRNSFDEQ
NEISGRYSWNFQKSTSSFNFTITASQVVDSAVYFCALSE
>V73RF-AJFE01069977.1-trav |(1078, 1365)|2.98696000066|(0.997,0.996,0.994)|1
LSGEDQVTQSPEALRLQEGESSSLNCSYTVSGLRGLFWYRQDPGKGPEFLFTLYSAGEEK
EKERLKATLTKKESFLHITAPKPEDSATYLCAVQ
>V74RF-AJFE01069977.1-trav |(12990, 13289)|2.35277255282|(0.884,0.680,0.974)|1
VSSKQEVTQIPAALSVPEGDNLVLNCSFTDSAIYSLQWFRQDPGKGLTSLLLIQSSQREQ
TSGRLNASLDKSSGRSTLYIAASQPGDSATYLCAVRHS
>V75RF-AJFE01069977.1-trav |(31158, 31455)|1.87545879833|(0.744,0.551,0.721)|1
VRGIQVEQSPPDLILQEGANSTLRCNFSASVNNLQWFHQNPWGQLINLFYIPSGTKQNGR
LSATTVATERYSLLYISSSQTTDSGVYFCAVEPQCSP
>V76RF-AJFE01069977.1-trdv |(56532, 56832)|2.10119110876|(0.879,0.678,0.754)|1
SSVAQKVTQAQSSVSMPVRKAVTLNCLHEASWWSYYIFWYKQLPSKEMIFLIRQGSDELN
AKSGRYSVNFKKAAKSVTLTISALQLEDSAKYFCALWE
>V77RF-AJFE01070458.1-trbv |(41725, 42019)|1.99958972011|(0.794,0.644,0.690)|1
VRSQTIHQWPATLVQPVGSPLSLECTVEGTSNPNLYWYRQAAGRGLQVLFYSVGIGQISS
EVPQNLSASRPQDRQFILSSKKLLLSDSGFYLCAWS
>V78RF-AJFE01104359.1-trbv |(3464, 3764)|2.3366534182|(0.887,0.765,0.784)|1
SMDTKVTQRPRLLVKANEQKAKTDCVPIKRHSYVYWYHKTLEEELKFLIYFQNEEIIQKA
EIINERFSAQCPQNSPCTLEIQSTESGDTAWYFCANSK
>V79RF-AJFE01104359.1-trbv |(12388, 12688)|1.9057717737|(0.852,0.532,0.858)|1
CFHAKVTQTPGYLVKGKGRKTKMYYTPENGHTFVCWYQQNQNKEFMFLISFQNEQVLQEM
EMHKKRFSSQCPKNPPCSLAILSSEPGDTALYLCATSP
>V80RF-AJFE01104359.1-trbv |(36551, 36842)|2.95080401921|(0.986,0.979,0.986)|1
LMEAEIYQTPRHRVIGTGKKITLECSQTMGHDKMYWSRSRNGITPHPPFLWVNSTEKGDL
SSESTVSRIRIERFPLTLESASPSHTSQYLCASSE
>V81RF-AJFE01104369.1-trbv |(8636, 8939)|2.97559608|(0.995,0.985,0.996)|1
SVFSAVISQKPSRDICQRGTSMTIQCQVDSQVTMMFWYCQQPGQSMTLIATANQGSEATY
ESRFVIDKFPISRPNLTFSTLTVSNRRPEDSSIYLCSVE
>V82RF-AJFE01000028.1-igkv |(103568, 103886)|2.31819966391|(0.993,0.672,0.991)|-1
SSGDIVMTQTPLSLPVTPGEPASISCRSSESLLDTDDEYTYLNWYLQKPGQSPQLLIYEV
SNRASGVPDRFSGSGSGTDFTLKISRVEAEDVGVYYCMQALQTP
>V83RF-AJFE01002289.1-igkv |(593, 893)|2.99067605248|(1.000,0.991,1.000)|-1
ARCDIQMTQSPSSLSASVGDRVTITCRASQGIRNDLGWYQQKPGKAPKLLIYAASSLQSG
VPSRFSGSGSGTDFTLTISSLQPEDFATYYCLQDYNYP
>V84RF-AJFE01002352.1-igkv |(655, 955)|2.97795641525|(1.000,0.994,0.985)|-1
ARCAIRMTQSPSSLSASTGDRVTITCRASQGISSYLAWYQQKPGKAPKLLIYAASTLQSG
VPSRFSGSGSGTEFTLTISCLQSEDFATYYCQQYYSYP
>V85RF-AJFE01003455.1-igkv |(8866, 9184)|2.69205850707|(0.990,0.831,0.969)|-1
TSGDIVMTQTPLSLPVTPGEPASISCRSSQSLLDSDDGNAYLDWYLQKPGQSPQLLIYEV
SNWASGVPDRFSGSGSGTDFTLKISRVEAEDVGVYYCMQALQTP
>V86RF-AJFE01010527.1-trdv |(4455, 4755)|2.10119110876|(0.879,0.678,0.754)|-1
SSVAQKVTQAQSSVSMPVRKAVTLNCLHEASWWSYYIFWYKQLPSKEMIFLIRQGSDELN
AKSGRYSVNFKKAAKSVTLTISALQLEDSAKYFCALWE
>V87RF-AJFE01010527.1-trav |(11555, 11845)|2.79985773786|(0.969,0.891,0.964)|-1
VSSILNVEQSPQSLHVQEGDSTNFTCSFPSSNFYALHWYRWETAKSPEALFVMTLNGDEK
KTGRISATLNTKEGYSYLYIKGSQPEDSATYLCAF
>V88RF-AJFE01010827.1-iglv |(3125, 3428)|2.91472560727|(0.998,0.996,0.936)|-1
SVTSYVLTQPPSVSVAPEQTARITCGGNNIGSKSVHWYQQKPGQAPVLVIYDDSDRPSGI
PERFSGSKSGNTATLTISRVEAGDEADYYCQVWDSSSKH
>V89RF-AJFE01010827.1-iglv |(11046, 11349)|2.99288400513|(1.000,0.995,0.998)|-1
SVVSSELTQDPAVSVALGQTVRITCQGDSLRSYYASWYQQKPGQAPVLVIYGNNNRPSGI
PDRFSGSSSGNTASLTITGAQAEDEADYYCSSLDSSGNH
>V90RF-AJFE01010827.1-iglv |(27044, 27354)|2.92374403277|(0.972,0.972,0.980)|-1
SWAQSALTQPPSVSGSPGQSVTISCTGTSSDVGSYNRVSWDQQPPGKAPKLMIYEVSKRP
SGVPDRFSGSKSGNTASLTISGLQAEDEADYYCSSYTSSST
>V91RF-AJFE01010828.1-iglv |(147, 450)|2.98120030738|(0.998,1.000,0.984)|-1
SVTSYVLTQPPSVSVAPGQTARITCGGNNIGSKSVHWYQQKPGQAPVLVVYDDSDQPSGI
PERFSGSKSGNTATLTISRVEAGDEADYYCQVWDSSSDH
>V92RF-AJFE01010829.1-iglv |(16809, 17106)|2.95737067436|(0.998,0.964,1.000)|-1
SVASYELTQPSSVSVSPGQTARITCSGDVLAKNYARWFQQKPGQAPVLVIYKDSERPSGI
PERFSGSSSGTTVTLTISGAQVEDEADYYCYSAADNN
>V93RF-AJFE01010829.1-iglv |(39526, 39836)|2.25515039631|(0.831,0.998,0.652)|-1
SWAQSALTQPPSVSGSPGQSVTISCTGTSTDIGSYNTVSWYQQHPGKAPKLMIYDVRWRP
SGVPDRFSGSKSGNTASLTISGLQAEDEADYSCCSYAGSST
>V94RF-AJFE01010857.1-ighv |(227, 534)|2.72352527565|(0.958,0.982,0.840)|-1
AHSQVQLVQSGAEVKKPGASVKISCKASGYTFTSYGISWVRQAPGQGLEWMGWIDAYYGN
TNYAEKLQGRVTMTTDTSRRTAYMELRRLRSDHTAVYYCA
>V95RF-AJFE01017581.1-iglv |(4261, 4557)|2.9929000027|(1.000,0.996,0.997)|-1
SVASYELTQPPSVSVSPGQTASITCSGDKLGDKYAYWYQQKSGQSPVLVIYQDSKRPSGI
PERFSGSNSGNTATLTISGTQAMDEADYYCQAWDSST
>V96RF-AJFE01017582.1-iglv |(28022, 28320)|1.86450364788|(0.707,0.575,0.659)|-1
LCALPVLTQPPSASASLGASVKLTCTLSSEHSTYTIEWYQQRPGRSPQYIMEVKSDGSHS
KGDGIPDRFMGSSSGADRYLTISNLQSDDEAEYHCGE
>V97RF-AJFE01017584.1-iglv |(3557, 3860)|2.99696400065|(1.000,0.997,1.000)|-1
SEASYELTQPPSVSVSPGQTARITCSGDALPKQYAYWYQQKSGQAPVLIIYEDSKRPSGI
PERFSGSSSGTMATLTISGAQVEDEADYYCYSTDSSGNH
>V98RF-AJFE01017584.1-iglv |(14566, 14876)|2.87120584607|(0.999,0.953,0.941)|-1
SWAQSALTQPPSASRSPGQSVTISCTGTSSDIGGYNYVSWYQQHPGKAPKLMIYEVSKRP
SGVPDRFSGSKSGNTASLTVSGLQAEDEADYYCSSYAGSNN
>V99RF-AJFE01017586.1-iglv |(12261, 12571)|2.95417917488|(0.991,1.000,0.966)|-1
SWAQSALTQPPSVSGSPGQSVTISCTGTSSDVGGYNYVSWYQQHPGTAPKLMIYDVSKRP
SGVPDRFSGSKSGNTASLTISGLQAEDEADYYCCSYAGSYS
>V100RF-AJFE01017587.1-iglv |(6592, 6895)|1.88368625663|(0.962,0.508,0.976)|-1
SATSYELTQPHSVSVATAQTARITCRGNNIGSKAVHWYQQKPGQDPVLVIYSDSNRPSGI
PERFSGSNSGNTATLTISRVEAGDEADYYCQVWDSSSDH
>V101RF-AJFE01020628.1-igkv |(921, 1245)|1.51963425252|(0.485,0.485,0.615)|-1
VQEAHEALLSPSLSRPRITVSVSLPLPGSWAQSVLTQPPSVSAAPGQKVTISCSGSSSDI
GNYAVSWYQQLPGTAPKLLIYENNKRPSGISDRFSGSKSGTSATLG
>V102RF-AJFE01020628.1-iglv |(6538, 6850)|2.98874002125|(1.000,0.993,0.996)|-1
SWAQSVLTQPPSVSGAPGQRVTISCTGSSSNIGAGYDVHWYQQLPGTAPKLLIYENNKRP
SGVPDRFSGSKSGTSASLAITGLQAEDEADYYCQSYDSSLSG
>V103RF-AJFE01020628.1-iglv |(24239, 24549)|2.35133198403|(0.828,0.697,0.965)|-1
SLSQPVLTQPPSFSASPGESARLTCTLPSDINVGSYNIYWYQQKPGSPPRYLLYYYSDSD
KGQGSGVPSRFSGSKDASANTGILVISGLQSEDAADYYCMI
>V104RF-AJFE01020631.1-iglv |(2749, 3058)|2.98994800078|(0.995,0.997,0.998)|-1
SWAQSVLTQPPSVSGTPGQRVTISCSGSSSNIGSNTVNWYQQLPGTAPKLLIYSNNQRPS
GVPDRFSGSKSGTSASLAVSGLRSEDEADYYCAAWDDSLNG
>V105RF-AJFE01020631.1-iglv |(24444, 24762)|2.85880720422|(0.997,0.901,0.997)|-1
SLSQPVLTQPTSLSASPGASARLTCTLRSGINVGSYYISWYQQKPGSPPRYLLNYYSDSD
KGQGSGVPSRFSGSKDASTNAGLLLISGLQSEDEADYYCAIWYS
>V106RF-AJFE01020632.1-iglv |(18572, 18882)|2.91180503062|(0.993,0.964,0.962)|-1
SLSQSVVTQPASLSASPGASASLTCTLRSGINVGTYRISWYQQKPGSPPRYLLRYKSDSD
KQQGSGVPSRFSGSKDASANAGILVISGLQSEDEADYYCMI
>V107RF-AJFE01020634.1-iglv |(1918, 2227)|2.99392000218|(1.000,0.998,0.996)|-1
SWAQSVLTQPPSVSAAPGQKVTISCSGSSSNIGNNYVSWYQQLPGTAPKILIYDNNKRPS
GISDRFSGSKSGTSATLGITGLQTGDEADYYCGTWDSSLSA
>V108RF-AJFE01022795.1-iglv |(18504, 18811)|1.9928205106|(0.632,0.716,0.683)|-1
SVVQAGLTQPPSVSKGLRQTATLTCTGNSNNVGNQGAAWLQQHQGHPPKLLSYRNNNRPS
GISERFSASRSGNTASLTITGLQPEDEAEYYCSAWDSSLS
>V109RF-AJFE01022796.1-igkv |(38920, 39226)|1.94734364002|(0.670,0.590,0.893)|-1
SLSQPVLTQSSSASASLGSSVKLTCTLSSGHSSYIIAWHQQQPGKAPRYLMKLEGSGSYN
KGSGVPDRFSGSSSGADRYLTISNLQSEDEADYYCETWDS
>V110RF-AJFE01022796.1-iglv |(57629, 57936)|2.90957299062|(0.989,0.934,0.999)|-1
SWANFMLTQPHSVSESLGQTVTISCPRSSGSIASNYVQWYQQRPGSAPTTVIYEDNRRPS
GVPDRFSGSIDRSSNSASLTISGLKSEDEADYYCQSYDSS
>V111RF-AJFE01022798.1-iglv |(2606, 2906)|2.91739010128|(0.985,0.963,0.972)|-1
SLSQLVLTQSPSASASLGASVKLTCTLSSGHSSYAIAWHQQQPEKGPRYLMKLNSDGSHS
KGDGIPDRFSGSSSGAERYLTISSLQSEDEADYYCQTW
>V112RF-AJFE01022798.1-iglv |(70777, 71086)|2.95194425777|(0.996,0.990,0.969)|-1
VDSQTVVTQEPPFSVSPGGTVTLTCGLSSGSVSTSYYPSWYQQTPGQAPRTLIYSTNTRS
SGVPGRFFGSIIGNKAALTITGAQADDESDYYCLLYMGSGI
>V113RF-AJFE01024275.1-trav |(5751, 6041)|1.8092145083|(0.740,0.514,0.740)|-1
GTSSNSVKQTGQITVSEGASVTMNCTSASTGYPTPFWYVQYPSKPLQLLQRETMENSKNF
GGGNIKDKNSPVVKYSVQVSDSAVYYCLLGDTVLK
>V114RF-AJFE01024275.1-trav |(11529, 11815)|1.86857181503|(0.628,0.584,0.672)|-1
VSAARNEVEQSPQDLTAQEGELITINCSYSVGINALHWLQQHPGGGIVSLFMLSSGKKKH
GRLIATINIQEKHSSLHITASHPRDSAIYICAV
>V115RF-AJFE01024276.1-trav |(19317, 19607)|2.9889000027|(0.994,0.997,0.998)|-1
VSSEDKVVQSPLSLVVHEGDTVTLNCSYEVTNFQSLLWYKQEKKAPTFLFMLTSSGIEKK
SGRLSSILDKKELFSILNITATQTGDSAIYLCAVE
>V116RF-AJFE01024276.1-trav |(73725, 74027)|2.99899200002|(0.999,1.000,1.000)|-1
FSMAQTVTQSQPEMSVQEAETVTLSCTYDTSESDYYLFWYKQPPSRQMILVIRQEAYKQQ
NATENRFSVNFQKAAKSFSLKISDSQLGDAAMYFCAYRS
>V117RF-AJFE01024276.1-trav |(95666, 95954)|2.97440816598|(0.995,0.983,0.997)|-1
LSGELKVEQSPLFLSTQEGKNYTIYCNYSTTSDRLYWYRQDPGKSLESLFVLLSNGAVKQ
EGQLMASLDTKARLSTLHITAAVHDLSATYFCAV
>V118RF-AJFE01045431.1-ighv |(1008, 1322)|1.90674558861|(0.919,0.811,0.584)|-1
VLSQVTLKESGPTLVKPTQTLTLTCTFSGFSLSTSGVGVGWIRQPPGKALEWLALIYSDN
DKRYSPSLKSRLTITKDTSKNQVVLTMTNMDPVDTATYYCAHR
>V119RF-AJFE01045439.1-ighv |(4672, 4981)|2.99899600001|(1.000,1.000,0.999)|-1
VQCEVQLVESGGGLVQPGGSLTLSCAASGFTFSSYWMSWVRQAPGKGLEWVANIKKDGSE
KYYADSVKGRFTISRDNAKNSLYLQMNSLRAEDTAVYYCAT
>V120RF-AJFE01045444.1-ighv |(1979, 2288)|2.99698000014|(1.000,0.999,0.998)|-1
AHSQVQLVQSGAEVKKPGASVKVSCKASGYTFTSYDINWVRQATGQGLEWMGWMNPNSGN
TGYAQKFQGRVTMTRDTSISTAYMELSSLRSEDTAVYYCAR
>V121RF-AJFE01045447.1-ighv |(71, 380)|2.99698000014|(0.998,1.000,0.999)|-1
VQCEVQLVESGGGVVQPGRSLRLSCAASGFTFSNYAMHWVRQAPGKGLEWVSVISSSGSY
IYYADSVKGRFTISRDNAKNSLYLQMNSLRAEDTALYYCAK
>V122RF-AJFE01045453.1-ighv |(639, 948)|2.99698000014|(1.000,0.999,0.998)|-1
VQCQVQLVESGGGLVKPGGSLRLSCAASGFTFSNHYMSWIRQAPGKGLEWVSYISYDSSY
INYADSVKGRFTISRDNAKNSLYLQMNSLRAEDTAVYYCAR
>V123RF-AJFE01047586.1-igkv |(1119, 1419)|3.0|(1.000,1.000,1.000)|-1
TRCDIQMTQSPSSLSASVGDRVTITCRASQGISNYLAWYQQKPGKAPKLLIYYASRLESG
VPSRFSGSGSGTDYTLTISSLQPEDFATYYCQQYNSNP
>V124RF-AJFE01070459.1-trbv |(7045, 7343)|2.36367232608|(0.989,0.988,0.689)|-1
SMDADVTQTPRNRITKTGKRIMLECSQTKGHDRMYWYRQDPGLGLRLIYYSFDVKDINKG
EISDGYSVSRQAQAKFSLSLESAIPNQTALYFCATSD
>V125RF-AJFE01070459.1-trbv |(21089, 21386)|2.99596800026|(1.000,0.998,0.998)|-1
LMEADIYQTPRYLVIGTGKKITLECSQTMGHDKMYWYQQDPGMELHLIHYSYGVNSTEKG
DLSSESTVSRIRTEHFPLTLESARPSHTSQYLCASSE
>V126RF-AJFE01070459.1-trbv |(65610, 65907)|2.26559437678|(0.919,0.670,0.898)|-1
PLEAQVTQNPRYLITVTGKKLTVTCFQNMNHEYMSWYRQDPGLGLRQIYYSINVEAIEKG
DVPEGYNVSRKEKRNFPLILESPSPNQTSLYFCASSL
>V127RF-AJFE01070459.1-trbv |(70897, 71194)|2.98393200206|(0.993,0.994,0.997)|-1
LVDVKVTQSSRYLVKRMGEKVFLECVQDMDHENMFWYRQDPGLGLRLIYFSSDVKMKEKG
DIPEGYSVSREKKERFSLILESASTNQTSMYLCASSI
>V128RF-AJFE01070459.1-trbv |(89682, 89985)|2.61297741374|(0.975,0.813,0.932)|-1
SVFSAVISQKPSRDICQRGTSLTIQCQVDSQVTMMFWYRQQPGQSPTLIATANQGSEATY
ETGFVIDKFPISRPNLTFSTLTVSNMSPEDSSIYLCSVE
>V129RF-AJFE01070460.1-trbv |(14989, 15285)|2.19214700479|(0.943,0.634,0.933)|-1
LSNAGVMQNPRHLVRRRGQEARLRCSPVKGHNHVYWYRQLPEEGLKFMVYLQKENIIDES
GMPKERFSAEFPKEGPSILRIQQAVRGDSAAYFCASS
>V130RF-AJFE01070460.1-trbv |(18108, 18405)|2.99699200002|(0.999,0.998,1.000)|-1
TVDGGITQSPKYLFRKEGQNVTLNCEQNLNHDAMYWYRQDPGQGLRLIYYSQIVNDFQKG
DIAEGYSVSREKKESFPLTVTSAQKNPTAFYLCASSI
>V131RF-AJFE01070460.1-trbv |(35929, 36229)|2.31798638187|(0.918,0.737,0.822)|-1
STDTKVTQRPRLLVKASEQKAKMDCVPIKGHSYVYWYRKKLEEELEFLVYFQNEELIQKA
EIINERFLAQCPKNSSCTLEIQSTESGDTALYFCASSK
>V132RF-AJFE01070460.1-trbv |(44986, 45286)|2.95150267138|(0.995,0.988,0.971)|-1
SFHAKVTQTPGHLVKGKGQKTKMDCTPEKGHVFVYWYQQNQNKEFMLLISFQNEQVLQET
EMHKTRFSSQCPKNTPCSLAILSSEPGDTALYLCASSQ
>V133RF-AJFE01070461.1-trbv |(12301, 12601)|2.2646924282|(0.866,0.955,0.648)|-1
LIDAGVTQTPRHKVTEMGQEVTMRCQPILGHNTVFWYRQTMMQGLELLAYFRNRAPLDDS
GMPKDRFSAEMLDATLATLKIQPSEPRDSAVYFCASGL
>V134RF-AJFE01070461.1-trbv |(19125, 19425)|2.85659938477|(0.997,0.968,0.919)|-1
HKEAGVTQFPSHSVIEKGQTVTLRCDPISGHDNLYWYRRVMGKEIKFLLHFVRESKQDES
GMPNNRFLAERTGGTYSTLKVQPAELEDSGVYFCASSQ
>V135RF-AJFE01070461.1-trbv |(29248, 29548)|2.95094800078|(0.982,0.985,0.984)|-1
SPGEEVTQTPKHLVRGEGQKAKLYCAPIKGHSYVFWYQQVLKKEFKFLISFQNENVFDKT
GMPKERFSAKCLSNSPCSLEIQATKLEDSAVYFCASSQ
>V136RF-AJFE01070462.1-trbv |(12014, 12314)|2.49135422101|(0.964,0.734,0.986)|-1
LIEAGVVQSPRYKIIEKKQPVAFWCNPISGHNTLYWYWQNLGQGPELLIRYENEEAVDDS
QLPKDRFSAERLKGVDSTLKIQPAELGDSAVYLCASSL
>V137RF-AJFE01070462.1-trbv |(17609, 17909)|2.98783600705|(0.999,0.994,0.995)|-1
HTDAGVIQSPRHEVTEMGQEVTLRCKPISGHNSLFWYRQTMMQGLELLIYFNNNVPIDDS
GMPKDRFSAKMPNASFSTLKIQPSEPRDSAVYFCASSL
>V138RF-AJFE01070463.1-trbv |(1165, 1465)|2.95052296609|(0.997,0.999,0.960)|-1
HTGAGVSQTPSNKVTEKGKDVELRCDPISGHAALYWYRQSLGQGPEFLIYFRGTGAADDS
GLPNDRFFAVRPEGSVSTLKIQRTEQGDSAVYLCASSL
>V139RF-AJFE01070463.1-trbv |(5986, 6282)|2.18711792098|(0.896,0.650,0.861)|-1
PVEAGVTQSLTHLIKTRGQQVTLRCSPISGHSSVSWYQQALGQGHQFISEYANELRRSEG
NFPNRFSGRQFHDYCSEMNVSALELGDSALYLCARSL
>V140RF-AJFE01070463.1-trbv |(16689, 16977)|1.98400129991|(0.890,0.536,0.997)|-1
AEITQSPRHKITETGRQVTLVCHQTWNHNNMFWYRQDLGHGLRLIHYSYGVQDTNKGEVS
DGYSVSRSNTEDFPLTLESAASSQTSVYFCASSE
>V141RF-AJFE01070463.1-trbv |(24431, 24731)|2.94104239695|(0.994,0.978,0.972)|-1
LSEAEVAQSPRYKITEKSQAVAFWCDPISGHATLYWYRQILGQGPELLVQFQDESVVDDS
QLPKDRFSAERLKGVDSTLKIQPAELGDSAMYLCASSL
>V142RF-AJFE01070463.1-trbv |(41824, 42121)|1.91105942791|(0.936,0.510,0.995)|-1
HRDAGITQSPRHKITETGRQVTLMCHQTWSHSYMFWYRQDLGHGLRLIYYSAAADITDKG
EVPDGYVVSRSKTENFPLTLESATRSQTSVYFCASSE
>V143RF-AJFE01070463.1-trbv |(57682, 57982)|2.21767958581|(0.733,0.704,0.804)|-1
CTDAGIIQSPKHEVTEMGQTVTLRCEPIFGHNLLFWYRDTFVQGLELLSYFRSRSIIDNA
GMPTDRFSAERPDGSFSTLKIQPAEQGDSAVYVCASRL
>V144RF-AJFE01070463.1-trbv |(67763, 68060)|2.92776289014|(0.996,1.000,0.943)|-1
PVNGGVTQTPKFQVLKTGQSMTLQCAQDMNHDYMYWYRQDPGMGLRLIHYSAGAGITDKG
EVPNGYNVSRSNTEDFPLSLVSAAPSQTSVYFCASSY
>V145RF-AJFE01070463.1-trbv |(71976, 72276)|2.9898400105|(0.998,1.000,0.992)|-1
HTGAGVSQSPRYKVAKRGRDVALRCDSISGHVTLYWYRQTLGQGSEVLTYFRSDAQRDKS
GRPSGRFSAERPERSVSTLKIQRTEQGDSAVYLCASSL
>V146RF-AJFE01070463.1-trbv |(79903, 80199)|2.96791360742|(1.000,0.979,0.991)|-1
SVETGVTQSPTHLIKTRGQQVTLRCSPQSGHNTVSWYQQALGQGPQFIFQYYREEENGRG
NFSPRFSGRQFPNYSSELNVNALELDDSALYLCASSL
>V147RF-AJFE01070463.1-trbv |(86352, 86648)|2.99389600501|(1.000,0.999,0.995)|-1
NAGVTQTPKFRILKIGQSMTLQCAQDMNHNYMYWYRQDPGMGLKLIYYSVGAGITDKGEV
PNGYNVSRSTTEDFPLRLESAAPSQTSVYFCASSYST
>V148RF-AJFE01070463.1-trbv |(99363, 99659)|2.97580866856|(0.997,0.980,1.000)|-1
PVDAGVTQSPTHLIKTRGQHVTLRCSPISGHKSVSWYQQALGQGPQFIFEYYEKEERGRG
NFPDRFSARQFPNYSSELNVNALLLGDSALYLCASSL
>V149RF-AJFE01070463.1-trbv |(104634, 104931)|2.14144644659|(0.734,0.672,0.752)|-1
PMNAGVTQTPKFHVLKTGQSMTLLCAQDMNHEYMYRYRQDPGKGLRLIYYSVAAALTDKG
EVPNGYNVSRSNTEDFLLKLESAAPSQTSVYFCASSY
>V150RF-AJFE01070463.1-trbv |(108994, 109294)|2.96904239695|(0.978,1.000,0.994)|-1
HTGAGVSQSPRYKVTKRGQDVTLRCDPISGHVALYWYQQALGQGPEFLTYFNYEAQPDKS
GLPNDRFSAERPEGSNSTLTIQRTEQRDSAMYLCASNL
>V151RF-AJFE01070463.1-trbv |(116814, 117110)|2.94594028297|(0.990,0.979,0.978)|-1
SVDAGVTQSPIHLIKTRGQQVTLRCSPQSGHDTVSWYQQVLGQGPQCIFEYYEEEERQRG
NFPDRFSGHQFPNYSSELNVNALLLGDSALYLCASSL
>V152RF-AJFE01070463.1-trbv |(124111, 124405)|2.34400899601|(0.966,0.839,0.759)|-1
PVNAGVTQTPKFRILKTGQSMTLQCARDMNHGYMSWYRQDPGMGLRLIYYSAAAGTTDKE
VPNGYNVSRLNTEDFPLRLVSAAPSQTSVYFCASSY
>V153RF-AJFE01070463.1-trbv |(128406, 128706)|2.97530822856|(0.997,0.995,0.984)|-1
HTGAGVSQSPRYKVTKRGQDVTLRCDPISSHATLYWYQQALGQGPEFLTYFNYEAQPDKS
GLPNDRFSAERPEGSISTLTIQRTEQRDSAMYLCASSL
>V154RF-AJFE01070463.1-trbv |(136837, 137133)|2.98972803289|(1.000,0.992,0.998)|-1
PVDAGVTQSPTHLIKTRGQHVTLRCSPISGHTSVSWYQQALGQGPQFIFQYYEKEERGRG
NFPDRFSARQFPNYSSELNVNALLLGDSALYLCASSL
>V155RF-AJFE01070463.1-trbv |(144146, 144443)|2.97588400513|(0.993,0.995,0.988)|-1
PVNAVVTQTPKFQVLKTGQSMTLQCAQDMNHDCMSWYRQDPGMGLRRIHYSVAAGITDKG
EVPDGYNVSRSNKEDLPLRLESAAPSQTSVYFCASSY
>V156RF-AJFE01070463.1-trbv |(148806, 149106)|2.9688400105|(0.991,0.993,0.985)|-1
HTGAGVSQSPKYKVTKRGQDVALRCDPISGHVSLFWYQQALGQGPEFLTYFRNEAQLDKS
GLPSDRFFAERPEGSVSTLKIQRTQQEDSAVYLCASSL
>V157RF-AJFE01070463.1-trbv |(157011, 157307)|2.93443897096|(0.994,0.957,0.989)|-1
PVEAGVTQSPTHLIKTRGQQVTLRCSPISGHTSVYWYQQALGLGLQFLLWYDEGEERNRG
NFPRRFSGRQFPNYSSELNVNALELEDSALYLCASSL
>V158RF-AJFE01070463.1-trbv |(166234, 166534)|2.97983600705|(0.993,0.989,0.998)|-1
HADTGVSQDPSHKITKRGQNVTFRCDPISEHNRLYWYRQTLGQGPEFLTYFQNEAQLEKS
RLLSDRFSAERPKGSFSTLEIQHTEQGDSAIYLCASSL
>V159RF-AJFE01070463.1-trbv |(172755, 173052)|2.94724064902|(0.997,0.959,0.997)|-1
SVAAGVIQSPRYLIKEKRETATLKCYPIPRHDTVYWYQQGPGQDPQFLISFYEKMQSDKG
SIPDRFSAQQFSDYHSELNMSSLELGDSALYFCASSS
>V160RF-AJFE01070464.1-trbv |(8813, 9110)|2.99193200206|(0.999,0.998,0.995)|-1
PLDTAVSQTPKYLVTQMGKKESLKCEQNLGHNAMYWYKQDSKKFLKTMFIYSNKEPILNE
TVPNRFSPDSPDKAHLNLHINSLELGDSAVYFCASSQ
>V161RF-AJFE01070464.1-trbv |(12266, 12563)|2.96765257659|(0.998,0.982,0.989)|-1
PMEMGVTQTPRHLVMGMTNKKSLKCEQHLGHNAMYWYKQSAKKPLELMFVYSLEERVENN
SVPSRFSPECPNSSHLFLHLHTLQPEDSALYLCASSQ
>V162RF-AJFE01070464.1-trbv |(20566, 20863)|2.97853206285|(0.998,0.992,0.989)|-1
PVNAGVTQTPKFRVLKTGQSMSLLCAQDMNHEYMYWYRQDPGMGLRLIHYSVGEGTTAEG
EVPDGYNVSRLKKQNFLLGLESAAPSQTSVYFCASSY
>V163RF-AJFE01070464.1-trbv |(52077, 52374)|2.9503601679|(0.989,0.977,0.985)|-1
PVIAGITQAPTSQILAAGRSMTLRCTQDMRHNAMYWYRQDLGLGLRLIHYSNTAGTTGKG
EVPDGYSVSRANTDDFPLTLASAVPSQTSVYFCASSD
>V164RF-AJFE01070465.1-trbv |(4903, 5200)|2.989900005|(0.995,1.000,0.995)|-1
PVNAGVTQSPKFRVLKTGQSMTLQCAQDMNHNYMYWYRQDPGMGLRLIHYSAGEGTTAKG
EVPDGYNVSRLNTQNFLLRLESAAPSQTSVYFCATSE
>V165RF-AJFE01119867.1-ighv |(1662, 1971)|2.50089284593|(0.868,0.904,0.771)|-1
AQSRVQLAQSGAEVKKPGASVKVSCKASGYTFTSYRMHWVCQAHAQGLEWMGLVCPSDGS
TSHAQKFQGRVTITRDTSMSTAYMELSSLRSEDTAMYYCVR
>V166RF-AJFE01119883.1-ighv |(31777, 32092)|2.95064403777|(0.988,0.983,0.980)|-1
VQCEVQLVESGGGLVQPGGSLRLSCAASGFTFSDHYMSWVRQAQGKGLELVRLIRNKANS
YTTEYAASVKGRFTISREDSKNTLYLQMSSLKTEDLAVYYCAR
>V0RF-ABGA01025787.1-ighv |(2055, 2364)|2.85301923951|(0.964,0.953,0.939)|1
TYSQVQLVQSGHEVKQPGASVKVSCKDSGYSFTTYGMNWVQQAPEQGLEWMGWFNTDTGN
PTYAQGFTGRFVFSMDTSVSTAYLQISSLKAEDTAMYYCAR
>V1RF-ABGA01025787.1-ighv |(23079, 23369)|1.87381815799|(0.622,0.580,0.708)|1
EVKKPGESLRISCKTSGYSFTSYWIHWVRQVPEKELEWIGGIYPGNSDTRYSPSFQGHVT
ISADSSISTTYLQWSSLKASDTAMYYCVRQTIQNL
>V2RF-ABGA01025790.1-ighv |(836, 1151)|2.63334828908|(0.965,0.791,0.995)|1
VQCEVQLVESGGGLVQPGGSLRLSCAASGFTSSDYQMYWVRQASGKGPEWVGYIGSKSNS
YATAYAASVKGRFTISRDDSKNTLYLQMNSLKTEDMAVYYCAR
>V3RF-ABGA01025791.1-ighv |(3901, 4216)|2.99899200002|(0.999,1.000,1.000)|1
VQCEVQLVESGGGLVQPGGSLRLSCAASGFTFSSYWMSWVRQAPGKGLEWVGFIKNKADG
GTTDYAASVKGRFTISRDDSKNTLYLQMNSLKTEDTAIYYCAR
>V4RF-ABGA01025791.1-ighv |(14222, 14536)|1.83462778915|(0.721,0.510,0.937)|1
VLSQVTLKESGPALVKPTQTLTLTCTFSGFSLSTSGIGVGWIRQPLGKAMEWLAHIYWTD
SKYYSSSLKSRLTISKDTSKSQVVLIMTSMDPVDTATYYCARI
>V5RF-ABGA01025797.1-ighv |(8415, 8724)|2.99599200002|(0.998,0.999,0.999)|1
VQCEVQLVESGGGLVQPGGSLRLSCVASGFTFSSYAMRWVHQAPGKGLEWVSAISGSGGS
TWYPDSVKGRFTISRDNAKNTLYLQMNSLRAEDTAVYYCVR
>V6RF-ABGA01025808.1-ighv |(3704, 4019)|2.99899200002|(0.999,1.000,1.000)|1
VQCEVQLVESGGGLVQPGGSLRLSCAASGFTFSSSAMHWVRQAPGKGLEWVGRIRSKANS
YATEYAASVKGRFTISRDDSKNTAYLQMNSLKTEDTALYYCTT
>V7RF-ABGA01025808.1-ighv |(11416, 11731)|3.0|(1.000,1.000,1.000)|1
LQCEVQLVESGGGLVQPGGSLRLSCAASGFTFSDHYMDWVRQAPGKGLEWVARIRNKANS
YTTEYAASVKGRFTISRDDSKNTLYLQMSSLKTEDTAVYYCAR
>V8RF-ABGA01025808.1-ighv |(27673, 27982)|2.99389600501|(1.000,0.995,0.999)|1
VQCEVQLVESGGGLVQPGGSLRLSCAASGFTFRDHYMNWVRQAPGKGLEWVSAISGSSSS
TYYADSVKGRFTISRDNAKNTLYLQMNSLRAEDTAVYYCVR
>V9RF-ABGA01025808.1-ighv |(39511, 39826)|2.98578801933|(0.997,0.999,0.990)|1
VQCEVQLVESGGGLVQPGGSLRLSCAASGFTFSNYYMSWVRQAPGKGLEWEGFIKNKTNG
GTTEYAASVKGRFTISRDDSKSITYLQMSSLKTEDTAVYYCTR
>V10RF-ABGA01025808.1-ighv |(52101, 52413)|2.8969022717|(0.988,0.927,0.997)|1
VQCELQLVESRGDLVQPGGSLRLSCAASGFTFSSYGMNWVCQAPGKGLEWVSVISRSSGT
IHYADSMKGRFTISRDNAKNSLYLQMNNSLRAEDTAVYYCVK
>V11RF-ABGA01025808.1-ighv |(65728, 66037)|2.58517153448|(0.940,0.965,0.780)|1
VQSQVQLVQSGAEVKKPGSSVKISCKVSEDTFSSYAISWVQQAPGQGLEWMGGIIPVLGT
ADYAQKFQGRVTITADTSTSTAYMELSSLRSEDTAVYYCAT
>V12RF-ABGA01025810.1-ighv |(7175, 7481)|2.99393200206|(0.999,0.995,1.000)|1
VQCEVQLVESGGGLVQPGGSLRLSCAASGFTISSYDMHWVHQAPGKGLEWVSAISTGGGT
YYADSVKGRFTISRDNAKNTLYLQMNNLRAEDTAVYYCAK
>V13RF-ABGA01037228.1-ighv |(1414, 1723)|2.96987023728|(0.999,0.976,0.997)|1
VLSQVQLQESGPGLVKPSETLSLTCAVSGGSISSGYYWGWIRQPPGKGLEWIGSIYYSGS
TYYNPSLKSRVTISVDTSKNQFSLKLSSVTAEDTAVYYCAR
>V14RF-ABGA01044302.1-ighv |(5170, 5476)|2.9889000027|(0.996,0.993,1.000)|1
VLSQVQLQESGPGLVKPSETLSLTCAVSGGSISSYYWSWIQQPPGKGLEWIGYIYSSGST
NYNPSLKSRVTMSVDTSKNQFSLKLSSVTAADTAVYYCAR
>V15RF-ABGA01044302.1-ighv |(9977, 10286)|2.79261652199|(0.940,0.929,0.925)|1
AHSQVQLGQSGPQVKKPESSVKVSCKASGYTFTSSAMQWVRQAPGQGLEWIGWIIVGSGN
TNYAQKFQGRVTITRDTSTSTAYMELSSLRSEDTAVYYCAA
>V16RF-ABGA01044304.1-ighv |(6033, 6342)|2.97369865217|(1.000,0.976,1.000)|1
VLSQVQLQESGPGLVKPSETLSLTCAVSGGSISSGYYWGWIRQPPGKGLEWIGSIYYSGS
TYYNPSLKSRVTISVDTSKNQFSLKLSSVTAADTAVYYCAR
>V17RF-ABGA01044305.1-ighv |(3517, 3823)|2.98532022844|(1.000,0.999,0.987)|1
VLSQVQLQESGPGLVKPSETLSLTCAVSGGSISSYYWGWIRQPPGKGLEWIGYIYSSGST
NYNPSLKSRVTMSVDTSKNQFSLKLSSVTAADTAVYYCVR
>V18RF-ABGA01044306.1-ighv |(1052, 1358)|3.0|(1.000,1.000,1.000)|1
VLSQVQLQESGPGLVKPSETLSLTCAVSGGSISSNYWSWIRQPPGKGLEWIGYIYSSGST
YYNPSLKSRVTMSIDTSKNQFSLKLSSVTAADTAVYYCAR
>V19RF-ABGA01044306.1-ighv |(5855, 6164)|2.32603268334|(0.733,0.895,0.869)|1
AHSQVQLVQSGPEVKKPGSSVKVSFKSSGYTFTSSAMQWVQQAPGQGLEWIGWIIVGNGN
TNYAQKFQGRVTITRDMSTSTAYMELSSLRSEDMAEYYSAA
>V20RF-ABGA01044307.1-ighv |(456, 762)|2.99385601037|(1.000,1.000,0.994)|1
VLSQVQLQESGPGLVKPSETLSLTCAVSGGSISSYYWSWIRQPPGKGLEWIGGIYSSGST
YYNPSLKSRVTISVDTSKNQFSLKLSSVTAADTAVYYCAR
>V21RF-ABGA01044310.1-ighv |(2823, 3129)|2.6723660475|(0.995,0.808,1.000)|1
VQCEVQLVESGGGLVQPGGSLRLSCAASGFTVSSSSMIWVRQAPGKGLEWVSYISSDGSA
YYTDSVKGRFTVSRDNSKNTLYLQMNSLRAEDTAVYYCAK
>V22RF-ABGA01044310.1-ighv |(11412, 11713)|1.68073095175|(0.650,0.567,0.539)|1
LVQPGGSLRLSFAASGFTFSSSWMHWVCQAPEKGLERVANIKCDGSEKYYADSVKGRLTI
SRDNAKNSLYLQMNSLRAEDMAVYYCVRDTVRGGQCEP
>V23RF-ABGA01044310.1-ighv |(19040, 19346)|2.35855115581|(0.978,0.968,0.692)|1
CAEVQLVQSGAEVKRPGESLRISCKTSGYSFTSNWISWVRQMPGKGLEWMGSIYPGDSDT
RYSPSFQGHVTISADKSISTAYLQWSSLKASDTAMYYCAK
>V24RF-ABGA01044313.1-ighv |(11041, 11356)|2.99798400013|(1.000,0.998,1.000)|1
VQCEVQLVESGGGLVHPGGSLRLSCTASGFTFGDYAMSWVRQAPGKGLEWVGFIRSKAYG
GTTEYAASVKGRFTISRDDSKSIAYLQMNSLKTEDTAVYYCAR
>V25RF-ABGA01044314.1-ighv |(13359, 13668)|2.57543051536|(0.992,0.767,1.000)|1
VQCEVQLVESGGGLVQPGGSLRLSCAASEFTFSSNDMSWVRQAPEKGLEWVSYISNSGRT
TYYADSVKGRFTISRDNAKNSLYLQMNSLRAEDTAVYYCVR
>V26RF-ABGA01044316.1-ighv |(14128, 14437)|2.54369575519|(0.848,0.806,0.914)|1
AHSQVQLVQSGAEVKRPGASVKVSCKASGYTFTSCYMYWVQQAPGQGLEWMGVINPSDGS
TSYAQKFQGRVTMTRDTSTSTVYMELSSLRSEDTAVYYYAR
>V27RF-ABGA01044319.1-ighv |(4092, 4401)|2.97922818506|(0.987,0.994,0.999)|1
VQCEVQLVESEGGLVQPGGSLRLSCAASGFTFDDYAMHWVRQAPGKGLKWVSGINWNGGS
TYYADSVKGRFTISRDNSKNSLYLQMNSLRAEDTALYYCAK
>V28RF-ABGA01058270.1-ighv |(14488, 14797)|2.79843921322|(0.957,0.977,0.886)|1
VLSQVQLQQWGPGLVKPSETLSLTCAVCGGSISSGYYWSWIRQPPGKGLEWIGYMHHSGS
TYYNPSLKSRVTMSVETSKNQFSLKLSSVTAADTAVYYCAR
>V29RF-ABGA01058270.1-ighv |(28194, 28503)|2.84806698619|(0.983,0.945,0.935)|1
VQCEVQLVESGGGLVQSRGSLRFSCAASGFTFSSCGMNWVRQAPGKGLEWVAIIWYDGSN
KYYADSVKGRFTISRDNSKNMLYLQMNSLRVEDMAVYYCAK
>V30RF-ABGA01058270.1-ighv |(38768, 39077)|2.91196034001|(0.969,0.961,0.983)|1
VLSQVRLQESGPGLVKPSETLSLTCAVSVDSISSGYYWSWIRQPPGKGLEWIGYIHHSGS
TYYNPSLKSRVTMSVDTSKNQFSLKLSSVTAADMAVYYCAT
>V31RF-ABGA01058273.1-ighv |(621, 936)|2.99496000066|(0.997,0.998,1.000)|1
VQCDVQLVESGGGLVQPGGSLRLSCAASGFTFSDYYMSWVHQPPGKGLEWVGLIRNKANG
GTTEYAASVKGRFTISRDDSKSIAYLQMNSLKTEDTAVYYCTR
>V32RF-ABGA01091248.1-trbv |(6357, 6654)|2.30549820899|(0.735,0.937,0.943)|1
HMDAGITQSPRHKITETGTPVTLKCHQTENRRYMYWCRQDLGHGLRLIHYSYGVKDTDKG
EVSDGYSVSRSKTEDFLLTLESATRSQTSVYFCAISE
>V33RF-ABGA01091248.1-trbv |(17283, 17574)|2.23139120876|(0.978,0.696,0.873)|1
AGVAQSPRYKIIEKKQPVAFWCNPISGHNTLYWYRQNLGQGPELLIRYENEEAVDDSQLP
KDRFSAERLKGVDSTLKIQPAELGDSAVYLCASSL
>V34RF-ABGA01091248.1-trbv |(29358, 29658)|2.80357170556|(0.974,0.953,0.900)|1
HTDAGVIQSPRHEVTEMGKEVTLRCKPISGHEDLFWYRQTMMQGLELLIYFNNKAVMDDS
GMPKDRFSAKMPNASFSTLKIQPSEPRDSAVYFCASSL
>V35RF-ABGA01091248.1-trbv |(32670, 32961)|2.40487771223|(0.961,0.785,0.836)|1
AGVIQSPRHEVTEMGKEVTLRCKPISGHDYLFWYRQTMMQRLELLIYFNNKAVMDDSGMP
KDRFSAKMPNASFSTLKIQPSEPRDSAVYFCASSL
>V36RF-ABGA01091249.1-trbv |(2283, 2583)|2.01834874273|(0.858,0.955,0.553)|1
LIDAGVTQTPRHKVTEMGQEVTMRCQPILGHNTVFWYRQTMMQGLELLAYFRNQAPLDDS
GMPKDRFSAEMPDATLATLKIQPSEPRDSAVYLCASGL
>V37RF-ABGA01091249.1-trbv |(9220, 9511)|2.39162399177|(0.961,0.964,0.702)|1
AGVTQFPSHSVIEKGQTVTLRCDPISGHDYLYWYRRVMGKEIKFLIYFVRESKQDESSMP
KNRFLAERTGGTYSTLKVQPAELEDSGVYFCASSQ
>V38RF-ABGA01091249.1-trbv |(14302, 14599)|2.86462728311|(0.972,0.929,0.971)|1
HGVAMVIQNPRYQVTQFGKPVTLSCSQNLNHNVMYWYQQKSSQAPKLLFHYYDKDFNNEA
DTPDNFQSRRPNTSFCFLDIRSPGLGDAAMYLCATSR
>V39RF-ABGA01091249.1-trbv |(19286, 19586)|2.60720737804|(0.969,0.932,0.809)|1
SPGEEVTQTPKHLVKGEGQEAKLYCAPIKGHSYVFWYQQVLKKEFKFLISFQNENVFDKT
GMPKERFSAKCLPNSPCSLEIQATKLEDSAVYFCASSQ
>V40RF-ABGA01091251.1-trbv |(2217, 2513)|2.23250809649|(0.927,0.835,0.696)|1
LSNAGVTQNPRHLVRRRGQEARLRCSPMKGHSYVYWYRQLPEEGLKFMVYLQKEKIIDES
GMPKERFSAEFPKEGPSILRIQQAVRGDSAAYFCASS
>V41RF-ABGA01091252.1-trbv |(2503, 2800)|2.9586404731|(0.986,1.000,0.974)|1
TVDGGITQSPKYLFRKEGQNVTLSCEQNLNHDAMYWYRQDPGQGLRLIYYSGIVNDFQKG
DIAEGYSVSREKKESFPLTVTSAQKNPTAFYLCASSI
>V42RF-ABGA01091256.1-trbv |(1883, 2180)|2.06862701033|(0.910,0.765,0.674)|1
SMDTKVTQRPRLLVKANEQKAKMDCVPIKGHSYVYWYRKKPEEELKFLLYFQNEEIQKAE
IINERFSAQYPKNSSCTLEIQSTETGDMALYFCASSK
>V43RF-ABGA01091257.1-trbv |(2769, 3069)|2.8678610854|(0.986,0.948,0.946)|1
SFHARVTQTPGHLVKGKGQKTKMDCTPEKGHTFVYWYQQNQNKEFMLLISFQNKQVLQET
EMHKKRFSSQCPKNTPCSLATLSSEPGDTALYLCASSQ
>V44RF-ABGA01091257.1-trbv |(13504, 13802)|2.88339035839|(0.986,0.980,0.930)|1
SMDADVTQTPRNRITKTGKRIMLECSQTKGHDGMYWYRQDPGLGLRLIYYSFDVKDINKG
EISDGYSVSRRTQAKFSLSLESATPNQTALYFCATSD
>V45RF-ABGA01091260.1-trbv |(5031, 5328)|2.88061441971|(0.998,0.980,0.925)|1
LMEADIYQTPRHLVIGTGKKITLECSQTMGHDKMYWYQQDPGMELHLIHYSYGVNSTEKG
DLSSESTVSRIRMEHFPLTLESARPSHTSQYLCASSE
>V46RF-ABGA01091263.1-trbv |(8280, 8583)|2.82878196667|(0.976,0.968,0.905)|1
SVFSAVVSQKPSRDICQRGTSLTIQCQVDSQVTMMFWYRQQPGQSLTLIATANQGSEATY
ESGFVIDKFPISRPNLTFSTLTVSNMSPEDSGIYLCSVE
>V47RF-ABGA01099934.1-ighv |(8362, 8671)|2.56357271975|(0.999,0.976,0.774)|1
VLSQVQLQESGPGLVKPSETLSLTCAVSGGSISSGYYWGWIRQPPGKGLEWIGHINYGGS
TSYNPSLKSRVTLSVDTSKNQFSLKLSSVTAADTAVYYCAR
>V48RF-ABGA01099934.1-ighv |(21569, 21878)|2.64072866395|(0.850,0.893,0.931)|1
AHSHVQLVQSGDEVRKPGASVKVSCKASGYTFTNHNMDWVRQAPGQGFEWMGGINTNTGG
TSYAQTFQGRVIMTRDTSTNTAFMELSSLRSEDMTVYYCAR
>V49RF-ABGA01099935.1-ighv |(7135, 7459)|2.06341074439|(0.779,0.797,0.604)|1
AHSQVQLVQSEPEMKQPGASVKFSCKATGYTFTSYVMNWVRQAPGQGLEWVGWINTNTGN
PMYAQGFTGQFVFSMDTSVSTVYLQISSLKAEDMAVYYCLRDTVWK
>V50RF-ABGA01099938.1-ighv |(2861, 3183)|2.36708698973|(0.761,0.789,0.938)|1
VLSQVTLKESGPALVKPTETLTLTCTVSGFSLSNSKMGVSWIRQPPGKALEWLAHIFSND
EKSYSTSLKSRLTISKDTSKSQVVLTMTNMDPVDTATYYCTRRAQ
>V51RF-ABGA01099940.1-ighv |(16077, 16386)|2.95669465218|(0.994,0.995,0.970)|1
AHAEVQLVQSGAEVKKPGASVKFSCKVSGYTFTELSMHWVRQAPGKGLEWMGGFDPDDGE
TIYAQKFQGRVTMTEDTSTDTAYMELSSLRSEDTAMYYCAT
>V52RF-ABGA01099941.1-ighv |(996, 1308)|2.99180001921|(1.000,0.993,0.999)|1
VQCEVQLVESGGGLVQPGGSLRLSCAASGFTFTNYYLHWFRQAPGKGLEWVAYISSGSGG
STNYPDSVKGRFTISRDNAKNTLYLQMNSLRAEDTAVYYCAR
>V53RF-ABGA01099941.1-ighv |(12097, 12412)|2.97554104219|(0.998,1.000,0.979)|1
VQCEVQLVESGGGLVQPGGSLRLSCAASGFTFSNYYMHWVRQAPGKGLEWVGFIRTEAKG
GTTEYAASVKGRFTISRDDSKSIAYLQTNSLKTEDTAVYYCTR
>V54RF-ABGA01099945.1-ighv |(5584, 5899)|2.95451241325|(0.999,0.987,0.972)|1
VQCEVQLVESGGGLVQPGGSLRLSCAASGFTFSNAWLSWVRQAPGKGLEWVGRIKSKADG
GTTDYAAPVKGRFTISRDDSKNTLYLQMNSLKTEDTAVYYCAT
>V55RF-ABGA01099946.1-ighv |(22626, 22932)|2.99796800026|(0.998,1.000,1.000)|1
VQCEVQLVESGGGLVQPGGSLRLSCAASGFTVSSYDMHWVRQAPGKGLEWVSAIDTDGDT
YYADSVKGRFTISRENAKNSLYLQMNSLRAKDTAVYYCAR
>V56RF-ABGA01099946.1-ighv |(36315, 36622)|2.99085601037|(0.999,0.999,0.993)|1
VQCEVQLVESGGGLVQPGRSLRLSCAASGITFSNQYMSWVRQATGKGLEWVSYISGDSSY
TSYADSVKGRFTISRDNAKNSLYLQMNSLRVEDTAVYYCV
>V57RF-ABGA01099947.1-ighv |(19776, 20085)|2.99594800078|(0.997,1.000,0.999)|1
VQCEVQLVESGGGLVQPGGSLRLSCAASGFTFSSYSMSWVRQAPGKGLEWVSAISGSGSS
TYYPDSVKGRFTISRDNAKNTLYLQMNSLRAEDMAVYYCVR
>V58RF-ABGA01099948.1-ighv |(6262, 6577)|2.96123309455|(0.991,1.000,0.972)|1
VQCEVQLVESGGGLVQPGGSLRLSCAASGFTFSNYYMHWVRQAPGKGLEWVGFIASKAYG
GTTEYAASVKGRFTISRDDSKSIVYLQMNSLKTEGTAVYYCTR
>V59RF-ABGA01099955.1-ighv |(3480, 3787)|2.58809995676|(0.872,0.984,0.801)|1
VCAEVQLVQSGAEVKRPGESLRISCKGSGYSFTSYWISWVRQMPGKGLELMGIIDPSDSD
TRYSPSFQGHITISADKSISTAYLQWTSLKASDTAMYYCA
>V60RF-ABGA01099956.1-ighv |(15185, 15494)|2.99899600001|(1.000,1.000,0.999)|1
VQCEVQLVESGGGLVQPGGSLRLSCAASGFTFSSYAMYWVRQAPGKGLEWVSAINSGGGS
TYYADSVKGRFTISRENAKNTLYLQMSSLRAEDTAVYYCAK
>V61RF-ABGA01104800.1-ighv |(1132, 1438)|2.96265347361|(1.000,1.000,0.967)|1
VLSQVQLQESGPGLVKPSETLSLTCAVSGGSISGYSWSWIRQPPGKGLEWIGSIHSSGST
YYNPSLKSRVTISADTSKNQFSLKLSSVTAADTAVYYCAR
>V62RF-ABGA01104801.1-ighv |(6863, 7169)|2.77652694322|(0.995,1.000,0.856)|1
VLSQVQLQESGPGLVKPSETLSLTCAVSGGSISSYYWSWIRQPPGKGLEWIGYIHSSGST
NSNPSLKSRVTMSVDTSKNQFSLKLSSVTAADTAVYYCAR
>V63RF-ABGA01129113.1-trbv |(1435, 1735)|2.90155347861|(0.978,0.983,0.945)|1
HTGAGVSQSPRYKVAKRGQDVALRCDSIFGHVTFYWYQQTLGQGPEVLTYFRSDAQRDKS
GLPSGRFSAERPEGSVSTMKIQHTEQGDSAVYLCASSL
>V64RF-ABGA01154382.1-igkv |(15548, 15866)|2.62460524455|(0.979,0.787,0.997)|1
AYGDIVMTQSPDSLAVSLGERITINCKSSQSVLYSSNNKNYLAWYQQKPGQAPKLLIYWA
STRQSGVPDRFSGSGSGTDFTFTISSLQAEDVAVYYCQQSYSAP
>V65RF-ABGA01154383.1-igkv |(2962, 3250)|2.40847870324|(0.841,0.736,0.881)|1
TTLTQSPAFVSATPGDKVTISCKASQDIDDDMNWYQQKPGEAAIFIIQEATTLISGIPPR
FSGSGYGTDFTLTINNIESEDAAYYFCLQHDNFP
>V66RF-ABGA01154588.1-trav |(5719, 6028)|1.99774570566|(0.859,0.912,0.552)|1
TIMYLVIGTAGQSLEQPSEVTAVEGAIVQINCTYQTSGFYGLSWYQQHDGGAPTFLSYST
LDGLEERGHFSSFLSRSDSYGYLLLQELQMKDSASYFCAVR
>V67RF-ABGA01173923.1-trav |(675, 979)|1.98512844993|(0.840,0.831,0.569)|1
QNIDQPTEITAMEGAIVQINCTYQTSGFNGLFWYQQHAREAPTFLSYNVLDGLDEKGHVS
SFLSRSKGYSYLLLKELQMKDSASYLCAVRDTVTMRSLW
>V68RF-ABGA01174988.1-ighv |(27125, 27434)|2.97982866804|(1.000,0.983,0.998)|1
VQCEVQLVESGGGLVQSRGSLRLSCAASGFTFSSCGMNWVRQAPGKGLEWVAVIWYDGSN
KYYADSVKGRFTISRDNSKNMLYLQMNSLRVEDTAVYYCAK
>V69RF-ABGA01174994.1-ighv |(8215, 8524)|2.61840899476|(0.945,0.977,0.791)|1
AQSQVQLVQSGAEVKKPGASVKVSCKASGYTFTNYYMQWVQQAPGQGLEWMREFNTRNGN
TQYIQEFQGRVTITRDTSTSTAYMELSSLRSEDTAVYYCVR
>V70RF-ABGA01174995.1-ighv |(11362, 11671)|2.29449268741|(0.957,0.754,0.814)|1
AHAKVQLVQSGAEVKKPGASVKVSCKVSGYTLTRLSMHWVRQAPRKGLEWMGGFYPVDGE
TIYAQKFQGRVTMTEDTSTDTAYMEISSLRSEDTAVYYCAT
>V71RF-ABGA01174999.1-ighv |(1443, 1758)|2.99899200002|(0.999,1.000,1.000)|1
VQCEVQLVESGGGLVQPGGSLRLSCAASGFTFSDYYMSWVHQPPGKGLEWVGLIRNKANG
GTTEYAASVKGRFTISRDDSKSIAYLQMNSLKTEDTAVYYCTR
>V72RF-ABGA01174999.1-ighv |(24157, 24466)|2.66558535767|(0.949,0.981,0.812)|1
VQCEVQLVESGGGLVQAGESLRLSCAASGFTFSSYRMNWVRQAPGKGLEWVSYISSDSSY
IYYADSVKVRFTISGDNAKNSMYLQMNNLRAKDTPVYYCVK
>V73RF-ABGA01194059.1-ighv |(3549, 3864)|2.98920015998|(0.990,1.000,1.000)|1
VQCEVQLVESGGGLVQPGGSLRLSCAASGFTFSNHYMQWVRQAPGKGLEWVGLIRNKADG
ETTDYAASVKGRVTISRDDSKSITYLQMSSLKTEDSAVYYCAR
>V74RF-ABGA01194064.1-ighv |(10045, 10354)|2.65473742105|(0.953,0.939,0.826)|1
VLSQVQLQESGPGLVKPLETLSLTCAVSGGSISSSNWWSWVRQPPGKGLEWIGEIYQSGS
TNYNPSLKSRVTISVDKSKNQFSLKLSSVTAADTAVYYCAR
>V75RF-ABGA01197604.1-igkv |(7602, 7920)|2.31717966443|(0.993,0.672,0.990)|1
SSGDIVMTQTPLSLPVTPGEPASISCRSSESLLDTDDEYTYLNWYLQKPGQSPQLLIYEV
SSQASGVPDRFSGSGSGTDFTLKISRVEAEDVGVYYCMQALQTP
>V76RF-ABGA01198108.1-igkv |(6191, 6491)|2.97076801985|(0.989,0.986,0.996)|1
ARCDIQMTQSPTSLSASIGDSVTSTCQASQSISNELAWYQQKPGKVPKLLIYRVSSLQMG
IPSRFSGSGSGTDFTLTITSLQPDDVATYYCQQEYSYP
>V77RF-ABGA01224584.1-trbv |(1799, 2096)|2.38025641666|(0.971,0.964,0.700)|1
LVDMKVTQSSRYLVKRMGEKVFLECVQDMDHERMFWYRQDPGLGLRLIYFSYDVKMKEQG
DVPEGYSVSREKKGHFSLILESASTNQTSMYLCASSL
>V78RF-ABGA01239557.1-trav |(769, 1061)|1.63526670814|(0.523,0.632,0.814)|1
TLIDAKTTQPTSMDCTEGRAANLPCNHSTISGNEYVYWFRQIHSQGPQYLIHGLKNSETN
EMASLIITEDRKSSTLILPHATLRDTAVYYCIVRV
>V79RF-ABGA01243343.1-ighv |(9466, 9772)|2.52323241028|(0.872,0.765,0.965)|1
VLSQVQLQQWGAGLVKPSETLSLTCAVYGGSFSDYGWNWIRQPPGKGLEWIGYIVSSGRT
NYNPSLKSRVTMSVDTSKNQFSLKLSSVTAADTAVYYCAR
>V80RF-ABGA01243345.1-ighv |(15320, 15629)|2.99067605248|(1.000,1.000,0.991)|1
VQCEVQLVESGGGLVQPGGSLRLSCAASGFTFSSYGMHWVRQAPGKGLEWVAVIWYDGSN
KYYADSVKGRFTISRDNSKNTLYLQMNSLRVEDTAVYYCAK
>V81RF-ABGA01270863.1-ighv |(174, 468)|1.98892928121|(0.887,0.538,0.996)|1
GGVGGGLVQPGGSLRLSCAASGFTFSNHYMQWVRQAPGKGLEWVGLIRNKADGETTDYAA
SVKGRVTISRDDSKSITYLQMSSLKTEDSAVYYCAR
>V82RF-ABGA01276890.1-trbv |(7515, 7815)|2.51821938167|(0.948,0.949,0.757)|1
LTEAGVAQSPRYKIIEKRQSVAFWCNPISGHATLYWYQQILGQGPKLLIQFQNDGVVDDS
QLPKDRFSAERLKGVDSTLKIQPANLGDSAVYLCASSL
>V83RF-ABGA01280669.1-iglv |(7470, 7780)|1.80345433857|(0.927,0.623,0.720)|1
SLSQPVQTQPSSHSACSGASARLTCTLSSGFSVGDFWISWYQQKPGNPPRYLLYYHSDSD
KGQGSGVPSRFSGSNDASANAGILRISGLQPKDEADYYCGT
>V84RF-ABGA01285645.1-igkv |(2124, 2410)|2.80792327612|(0.979,0.889,0.972)|1
IVMMQSPATLSVSPGERGTISCRASQSVSNYLAWYQQKPGQSPRLLIYRASNRATGIPAR
FSGSGSGTDFTLTISSVELEDFAVYYCQQYNAG
>V85RF-ABGA01285648.1-igkv |(32619, 32919)|2.99593600205|(1.000,0.996,1.000)|1
ARCDIQMTQSPSSVSASVGDRVTITCRASQGISSALAWYQQKPGKPAKLLIYAASSLQSG
VPSRFSGSGSGTDYTLTISSLQPEDFATYYCQQYNSVP
>V86RF-ABGA01285649.1-igkv |(12602, 12902)|2.95604987297|(0.994,0.992,0.972)|1
ARCDIQMTQSPSSLSASVGDRVTITCRASQGISDDLAWHQQKPGKAPKLLIYAASSLQSG
VPSRFSGSESGTEFTLTISSLQPEDFATYYCQQYNSYP
>V87RF-ABGA01285651.1-igkv |(14331, 14619)|2.55069686097|(0.993,0.998,0.758)|1
IVMTQSPATLSLSPGERATISCRASQSVSNYLAWYQQKPGQAPRLLIHSASTRATGIPAR
FSGSGSGTDFTLTISSLEPEDFAVYYCQQGNNLP
>V88RF-ABGA01290070.1-igkv |(266, 566)|2.79645433043|(0.983,0.894,0.954)|1
TTGEVVLTQSPATLSLSPGERATLSCRASQSVSNYLAWYQQKPGQAPRLLIYDASNRATG
IPARFSGSGSGTDFTLTISSLEPEDFAVYYCQQRSNLP
>V89RF-ABGA01290201.1-trgv |(6850, 7160)|2.11456550943|(0.886,0.698,0.742)|1
SQISSNLEGRTKSVTGPTGSSAEITCDLPGASTLYIHWYLYQEGKAPQRLLYYEPYYFRV
VLESGITPGKYDTGSTRSSWNLRLQNLIENDSGVYYCATWD
>V90RF-ABGA01290201.1-trgv |(11173, 11486)|2.92116605151|(0.998,0.947,0.987)|1
SQKSSNLEGRTKSVTRPTGSSAEITCDLPGESTVYIHWYLHQEGKAPQRLLYYDSYNSRV
VLESGISPGKYDTYGSTRKNLRLILRNLIENDSGVYYCAIWD
>V91RF-ABGA01290201.1-trgv |(15529, 15842)|2.86284532288|(0.993,0.992,0.907)|1
SQKSSNLEGGTKSVTRPTRSSAEITCDLTVTNAFYIHWYLHQEGKAPQRLLYYDVSNSRD
VLESGLGPGKYYTHTPRWWSWILILRNLIENDSGVYYCATWY
>V92RF-ABGA01290202.1-trgv |(2218, 2531)|2.9256309073|(0.999,0.992,0.946)|1
SQKSSNLEGGTKSVTRPTRSSAEITCDLTVTNAFYIHWYLHQEGKAPQRLLYYDVSTARD
VLESGLSPGKYYTHTPRRWSWILRLQNLIENDSGVYYCATWD
>V93RF-ABGA01290204.1-trgv |(2691, 2990)|1.66971745417|(0.688,0.613,0.510)|1
SQKSSNLQGRRKSVTRPTGSSAIITCDLTVINTFYIHWYLHQAGKAPQRLLYYDPYYSRD
VLESRISPGKYFTYASMRRSWKLILQNLIENDSGSITV
>V94RF-ABGA01290204.1-trgv |(7449, 7762)|2.45169890216|(0.924,0.775,0.856)|1
SQKSSNLEGRTKSVTRPTGSLAVITCDLPVEDAAYIHWYLHQEGKAPQRLLYYDVSTSKV
VLESGISPGKYQTYASTRRSFRFILENLIEHDSGVYYCATWD
>V95RF-ABGA01297342.1-iglv |(5546, 5856)|2.15801621926|(0.880,0.615,0.912)|1
SLSQPVPTEPSSHSASSGASARLTCTLSSGFSVGDFWISWYQQKPGNPPRYLLYYHSDSD
KGQGSGVPSRFSGSNDASANAGILRISGLQPEDEADYYCGT
>V96RF-ABGA01301078.1-trbv |(8868, 9168)|2.91663412726|(0.996,0.996,0.938)|1
HTGAGVSQSPRYKVTKRGQDVALRCDPISGHDYLYWYQQALGQGPEFLTYFQNDVQLDKS
GMPSDRFSAEGLEGSISTLKIQRTEQGDSAVYLCASSL
>V97RF-ABGA01301081.1-trbv |(704, 1000)|2.06146884169|(0.965,0.871,0.627)|1
SVETGVTQSPTYLIKTRGQQVTLRCSPISGHKSVSWYQQALGQGPQFIFQYYREEENGRG
NFPRRFSGHQFLNHSSELNVNALELEDSALYLCASSL
>V98RF-ABGA01301082.1-trbv |(3712, 4002)|2.02964027238|(0.932,0.799,0.646)|1
ETGVTQSPTYLIKTRGQQVTLRCSPISGHKSVSWYQQALGQGPQFIFQYYREEENGRGNF
PHRFSGHQFLNHTSELNVNALELDDSALYLCASSL
>V99RF-ABGA01301083.1-trbv |(1589, 1880)|2.97350008499|(0.993,0.998,0.983)|1
NAGVTQTPKFRILKTGQSMTLQCAQDMNHNYMYWYRRDPGMGLKLIYYLVAAGTTDKGEV
PDGYSVSRSTTEDFPLTLESAAPSQTSVYFCASSY
>V100RF-ABGA01301086.1-trbv |(3670, 3966)|2.97606587284|(1.000,0.978,1.000)|1
PVDAGVTQSPTHLIKTRGQQVTLRCSPISGHKSVSWYQQALGQGPQFIFEYYEKEERGRG
NFPDRFSARQFPNYSSELNVNALLLGDSALYLCASSL
>V101RF-ABGA01301086.1-trbv |(10960, 11257)|2.90483774723|(0.995,0.953,0.967)|1
PMNAGVTQTPKFQVLKTGQSMTLQCAQDMNHDYMSWYRQDPGIGLRLIHYSVAAGITEKG
ETPSGYNVSRSNTEDFPLRLESAAPSQTSVYFCASSY
>V102RF-ABGA01301086.1-trbv |(15590, 15890)|2.87604157414|(0.964,0.971,0.943)|1
HTGAGVSQSPRYKVTKRGQDVALRCDPISGHVSLFWYQQALGQGPELLTYFQNEVQLHKS
GLPSDRFFAERPEGSICTLKIQRTQQEDSAMYLCASSL
>V103RF-ABGA01313761.1-ighv |(1090, 1396)|2.994900005|(1.000,1.000,0.995)|1
VLSQVQLQESGPGLVKPSETLSLTCAVSGGSISGYYWSWIRQPPGKGLEWIGYIYSSGST
NYNPSLKSRVTVSVDTSKNQFSLKLSSVTAADTAVYYCAR
>V104RF-ABGA01313761.1-ighv |(5857, 6178)|1.5541161971|(0.518,0.508,0.529)|1
KVAFTHSCVLSTGAHSQVQLGQSGPEVKKPGSSVKVSCKASGYTFTSSAMQWVRQSPGEG
LEWIGWIIVGSGNTNYAQKFQGRVTITRDMSTSTAYMELSSLRSE
>V105RF-ABGA01313763.1-ighv |(465, 774)|2.79261652199|(0.940,0.929,0.925)|1
AHSQVQLGQSGPQVKKPESSVKVSCKASGYTFTSSAMQWVRQAPGQGLEWIGWIIVGSGN
TNYAQKFQGRVTITRDTSTSTAYMELSSLRSEDTAVYYCAA
>V106RF-ABGA01313764.1-ighv |(1353, 1662)|2.72222701821|(0.982,0.843,0.972)|1
VLSQVQLQESGPGLVKPSETLSLTCAVSGGSISSSYYWGWIRQPTGKGLEWIGHIYSSGS
TYYNPSLKSRVTISVDTSKNQFSLKLSSVTAEDTAVYYCAR
>V107RF-ABGA01318850.1-igkv |(776, 1076)|2.99174403277|(1.000,0.992,1.000)|1
SRCDIQMTQSPSSVSASVGDRVTITCQASQGVSNALAWYQQKPGKTPKLLIYDATTLQSG
VPSRFSGSGSGTDYTLTISSLQPEDFATYYCQQYNSYP
>V108RF-ABGA01321050.1-trdv |(10390, 10696)|1.96310269727|(0.892,0.971,0.531)|1
RGMLCDKVTQSSPDQTVASGSEVVLLCTYDTVYSNPDLFWYRIRPDYSFQFVFYGDNSGS
QAADFTQGRFSVKHIPTQKAFHLVISPLRTEDSATYYCAF
>V109RF-ABGA01321409.1-igkv |(1894, 2185)|2.99696400065|(1.000,0.997,1.000)|1
DIQMTQSPSSVSASVGDRVTITCRASQSISSWLAWYQQKPGKAPKLLIYKASNLQSGVPS
RFSGSGSGTDFTLTISSLQPEDFATYYCQQYSSTP
>V110RF-ABGA01321410.1-igkv |(12114, 12400)|2.9226309073|(0.998,0.991,0.945)|1
IVMTQSPATLSVSPGERGTISCRASQSVSNYLAWYQQKPGQSPRLLIYRASNRATGIPAR
FSGSGSGTDFTLTISSVEPEDFAVYYCQQYNTG
>V111RF-ABGA01335280.1-iglv |(1203, 1509)|2.91754805197|(0.973,0.965,0.980)|1
DSQTVVTQEPSFSVSPGGTVTLTCGLSSGSVSTSYYPSWYQQTPGQALRMLIYSTNTRTS
GVPDCFSGSILGNKAALTITGAQADDESDYYCVLYMGSGI
>V112RF-ABGA01342015.1-igkv |(1575, 1875)|2.99280401921|(1.000,1.000,0.993)|1
TRCDIQMTQSPSSLSASVGDRVTITCRASQSISNYLAWYQQKPGKVPKLLIYAASTLQSG
VPSRFSGSGSGTDFTLTISSLQPEDVATYYCQKHNSAP
>V113RF-ABGA01356721.1-igkv |(4236, 4536)|3.0|(1.000,1.000,1.000)|1
SRCDIQMTQSPSSLSASVGDRVTITCRASQSISSWLAWYQQKPGKAPKLLIYAASSLQSG
VPSRFSGSGSGTDFTLTISSLQPEDFATYYCQQHNSYP
>V114RF-ABGA01356722.1-igkv |(4085, 4385)|2.47683530568|(0.973,0.731,0.982)|1
SRCDIQMTQPPSSMSAYVGDRVTVNCQASQGISSWLAWYQQKPGKAPKLLIYKASSLQSG
VPSRFSGSGSGTDYTLTISSLRPEDFATYYCQQANGVP
>V115RF-ABGA01356724.1-igkv |(802, 1093)|2.99598000014|(0.999,0.997,1.000)|1
DIQMTQSPSSVSASVGDRVTITCRASQGISNYLNWYQQKPGKAPKLLIYAASSLQSGVPS
RFSGSGSGTDFTLTISSLQPEDFATYYCQHFNSYP
>V116RF-ABGA01356726.1-igkv |(7542, 7842)|2.97106187285|(0.998,0.976,0.999)|1
TTGEIVLTQSPATLSLSPGERATVSCRASQSVSNYLAWYQQKPGQSPRLLIYDASNRATG
IPARFSGSGSGTDFTLTISSLEPEDFAVYYCQQYNNQT
>V117RF-ABGA01356729.1-igkv |(273, 573)|2.99698000014|(1.000,0.999,0.998)|1
ARCDIQMTQSPSSVSASVGDRVTITCRASQGISSYLAWYQQKPGKAPKLLIYAASSLQSG
VPSRFSGSGSGTEFTLTISSLQPEDFATYYCMQHNSYP
>V118RF-ABGA01362157.1-ighv |(1861, 2165)|2.68860229963|(0.873,0.978,0.881)|1
CAEVQLVQSGAEVKRPGESLRISCKGSGYSFTSYWISWVRQMPGKGLELMGMIDPSDSDT
RYSQSFQGHITISADKSISTAYLQWTSLKASDTAMYYCA
>V119RF-ABGA01378070.1-trbv |(11166, 11457)|2.01143916866|(0.724,0.602,0.745)|1
LMEADIYQTPRHRVIRTGKKITLECSQTMGHDKRYWSRSRNGITPHPLFLWVNSTEKGDL
SSESTVSRIRIQHFPLTLESASPSHTSQYLCASSE
>V120RF-ABGA01384193.1-ighv |(10967, 11276)|2.99598000014|(0.999,1.000,0.997)|1
VQCEVQLVESGGGLVQPGGSLRLSCAASGFTFSSYGMNWVRQAPGKGLEWVSYISGDSSY
INYADSVKGRFTISRDNAKNSLYLRMNSLRAEDTAVYYCVK
>V121RF-ABGA01386446.1-trav |(520, 807)|2.99899600001|(1.000,0.999,1.000)|1
VNSQQGEEDPQALSIQEGENATMNCSYKTSINNLQWYRQNSGRGLVHLILIRSNEREKHS
GRLRVTLDTSKKSSSLLITASRAADTASYFCATD
>V122RF-ABGA01386446.1-trav |(6159, 6450)|2.92288400513|(0.972,0.977,0.974)|1
RTNGDPVTQTEGPVTLPERAALTLNCTYQSSYSAFLFWYVQYLNKEPELLLRSSENQETD
SRGFQASHVKSDSSFHLEKPSVQLSDSAVYYCVLR
>V123RF-ABGA01386446.1-trdv |(9538, 9841)|2.88850238965|(0.979,0.988,0.931)|1
SSMAQKVTQAQAAISVVEKEEVTLDCVYETRDATYYLFWYKQPSSGELVFLIRQNSFNEQ
NEVNGRYSWNFQKSTSSFNLTITASQVMDSAVYFCALSE
>V124RF-ABGA01386449.1-trav |(5636, 5936)|1.71555694155|(0.733,0.592,0.569)|1
LSGEDQEKSPEALRLQEGESSSLNCSYTVSGLRGLFWYRQDPGKGPELLFFLYSAGEEKE
KERLKATLTKKESFLHITAPKPEDSATYLCAVQARCSP
>V125RF-ABGA01386453.1-trav |(7857, 8156)|2.07415085841|(0.753,0.605,0.966)|1
VSSKQEVTQIPGALSVPEGENLVLNCSFTDSAIYNLRWFRQDPGKGLTSLLFIQSSQREQ
TSGRLNASLDKSSGRSTLSIAASQPGDSATYLCAVRHS
>V126RF-ABGA01387831.1-trav |(4904, 5207)|2.91423069306|(0.979,0.943,0.999)|1
PGIAQKITQTLPAMFVQEKEAVTLDCTYDTSDQSYGLFWYKQPSSGEMILLIYQGSYDKQ
NATEGRYSLNFQKARKSANLVISASQLGDSAMYFCAMKE
>V127RF-ABGA01387833.1-trav |(6325, 6619)|2.92456585077|(0.956,0.989,0.988)|1
RTHGDSVTQMEGPVTLSEEAFLTINCTYTATGYPSLFWYVQYPGEGLQLLLKATKADDKG
SNKGFEATYHKETTSFHLEKDSVRESDSGVYFCALS
>V128RF-ABGA01387833.1-trav |(37695, 37988)|2.97296800026|(0.991,0.989,0.993)|1
VWCQQKEVEQNPGPLSVPEGAIASLNCTYSNSAFQYFMWYRQYSRKGPELLIYIYSSGNK
QDGRFTAQVDTSGKYMSLFIRDSQPSDSATYLCAMS
>V129RF-ABGA01394059.1-igkv |(7736, 8051)|2.39444870344|(0.985,0.814,0.815)|1
SSGDIVMTQSPLSLPVTPGEPASISCRSSQSLLHSNRYNYLNWYLQKPGQSPQLLIYLGS
NRASRVPDRFSGSGSGTDFTLKISRVEAEDVGVYYCTQTLQTP
>V130RF-ABGA01394062.1-igkv |(9765, 10067)|2.89484208391|(0.989,0.924,0.999)|1
SSAEIVMTQTPLSLSITPGEPASISCRSSQSLLHSDGNTYLHWYLQKPGQPPQLLIYEVS
NRFSGVPDRFSGSGSGTDFTLKISRVEAEDVGVYYCMQD
>V131RF-ABGA01394064.1-igkv |(17826, 18124)|1.93489514771|(0.986,0.525,0.997)|1
SRGEIVLTQSPAFRSETLKEKVTITCRASQSIGSRLHWYQQKPDQSPKLLIKYASQSISG
VPSRFSGSGSGTDFTLTINSLEAEDAATYYCQQGSSL
>V132RF-ABGA01394066.1-igkv |(10063, 10363)|2.7755646145|(0.980,0.904,0.926)|1
TTGEIVLTQSPATLSLSPGERATLSCRASQSVSNYLAWYQQKPGQVPRLLIYRASNRTTG
IPDRFSGSGSGTDFTLTISRLDPEDFAVYYCQQYGSSP
>V133RF-ABGA01394066.1-igkv |(40656, 40948)|2.16164145853|(0.991,0.613,0.993)|1
SRGDIVMTQSPAFLSVTPVEKVTITCQASEGISNYLNWYQQKPDQAPKLLIKYASQSISG
VPSRFSGSGSGTDFTFTISSLEAEDAATYYCQQGN
>V134RF-ABGA01394068.1-igkv |(3664, 3964)|3.0|(1.000,1.000,1.000)|1
SRCDIQMTQSPSSVSASVGDRVTITCRASQGISNYLAWYQQKPGKAPKLLIYYASSLQSG
VPSRFSGSGSGTDYTLTISSLQPEDFATYYCQQYNSYP
>V135RF-ABGA01394071.1-igkv |(1743, 2043)|2.99480001|(0.995,1.000,1.000)|1
SRCDIQMTQSPSSLSASVGDRVTITCQASQGISNALAWYQQKPGKTTKLLIYRASSLQSG
VPSSFSGSGSGTDFTLTISSLQPEDFATYYCQQYYSDP
>V136RF-ABGA01394075.1-igkv |(3782, 4082)|2.87989058342|(0.995,0.944,0.957)|1
TTGEIVMTQSPATLSLSPRERATISCRASQSVSSNLAWYQQKPGQAPRLLIYGASNRATG
IPARFSGSGSGTDFTLTISSLEPEDFAVYYCQQYNNWP
>V137RF-ABGA01047585.1-trbv |(3005, 3305)|2.3110318509|(0.821,0.740,0.782)|-1
CFHAKVTQTPGYLVKGKGKKTKMYCTPEKGHTFVCWYQQNQNKEFMFLISFQNEQVLQET
EMHKKRFSSRCPKNPPCSLAILSLEPGDTALYLCASSP
>V138RF-ABGA01052527.1-trbv |(437, 737)|2.1997520069|(0.828,0.644,0.858)|-1
CFHAKVTQTPGYLVKGKGRKTKMYCTPAKGHTFVCWYQQNQNKEFMFLISFQNEQVLQET
EMHKKRFSSQCPKNPPCSLAILSLEPGDTALYLCASSP
>V139RF-ABGA01061552.1-trav |(1941, 2240)|1.98450700028|(0.905,0.792,0.618)|-1
VNGQQVMQIPQCQHVQEGEDFTTYCNSSIALSNIQWYKQRPGGHPVFLIQLVKSGEVKKQ
KRLTFQFGEAKKNSSLHITATQTTDVGTYFCAGHSAPQ
>V140RF-ABGA01061554.1-trdv |(7774, 8077)|2.14616931427|(0.860,0.614,0.891)|-1
SSVAQQVTQAQSSVSMPVGKAVTLNCLYETSWWWSYYIFWYKQPPSKEMIFLIRQGSGEQ
NAKNGRYSVTFKEAAKSIALTISALQLEDSAKYFCAVWE
>V141RF-ABGA01083932.1-trav |(371, 664)|2.92428751647|(0.977,0.954,0.997)|-1
VSRGESVRPHLSTLGVQEGDNSVINCAYSDSASDYFIWYKQESGKGPQFIIDIRSNMDKR
QGQRVTVLLNKTVKHLSLQIAATQPGDSAVYFCAEN
>V142RF-ABGA01083934.1-trav |(495, 792)|2.94263026991|(0.992,0.984,0.969)|-1
GTRAQSVTQLDSHVSVSEGALVLLRCNYSSSVSPYLFWYVQYPNQGLQLLLKYTSGTTLV
KGINGFEAEFKKSETSFHLTKPSAHVSDTAQYFCAVS
>V143RF-ABGA01083937.1-trav |(4214, 4504)|2.97988400513|(0.991,0.993,0.996)|-1
VNGENVEQHPSTLSVQEGDSSVIKCTYSDSASNYFPWYKQEVGKGPQFIIDIRSNMGEKK
DQRITVILNKTAKHFSLHITETQPGDSAVYFCAAS
>V144RF-ABGA01083938.1-trav |(4846, 5150)|2.11080862632|(0.908,0.659,0.805)|-1
TARAQSVTQPDIHITVSEGTSLELRCNYSYGATPSLFWYVQFPGQGLQLLLKYFSGETLV
QGIKSFEAEFKRSQSSFNLRKSSVHWSDAAEYFCAAGGA
>V145RF-ABGA01083939.1-trav |(4457, 4751)|2.99696400065|(1.000,1.000,0.997)|-1
GINGDSVVQTEGQVLLSEGDSLIVNCSYETTQYPSLFWYVQYPGEGPQLLLKAMKANDKG
RNKGFEATYRKETTSFHLEKDSVQESDSAVYFCALS
>V146RF-ABGA01083939.1-trav |(18067, 18360)|2.99696400065|(1.000,0.997,1.000)|-1
GSGKNQVEQSPQSLIILEGKNCTLQCNYTVSPFSNLRWYKQDTGRGPVSLTIMTFSENTK
SNGRYTATLDADTKQSSLHITASQLSDSASYICVVS
>V147RF-ABGA01083939.1-trav |(34050, 34338)|2.9690773318|(1.000,0.980,0.991)|-1
VWSQQKEVEQDPGPFNVPEGATVAFNCTYSNSASQSFFWYRQDCRKEPKLLMSVYSSGNE
NGRFTAQLNRASQYISLLIRDSQLSDSATYLCAV
>V148RF-ABGA01083939.1-trav |(39521, 39818)|2.84875676613|(0.968,0.930,0.957)|-1
GTRAQSVTQLDSHVPVSEGTRVLLRCNYSSSYSPSLFWYVQHPNQGLQLLLKYLSGPTLV
KGINGFEAEFKKSETSFHLTKSSAHVSDAAEYFCAMS
>V149RF-ABGA01113129.1-trav |(4972, 5260)|2.91558488932|(0.973,0.950,0.997)|-1
VKSQKIEQNSEALNIQEGKTATLTCNYTNYSPTYLQWYRQDPGRGPVFLLLIRENEKEKR
KERLKVSFDTTLKQSLFHITASQPADSATYFCAL
>V150RF-ABGA01113130.1-trav |(6720, 7010)|2.97766002957|(0.997,0.990,0.991)|-1
MSRGEDVEQTLFLSVQEGDSSVINCTYTDSSSTYLYWYKQEPGAGLQLLTYIFSNMDLKQ
DQRLTVLLNKKDKHLSLRIADTQTGDSAIYFCAEH
>V151RF-ABGA01113133.1-trav |(15271, 15560)|2.86225977111|(0.978,0.924,0.972)|-1
QSVAQPEDEVTVAEGNPLTVKCTYSVSGNPYLFWYIQYPNEGLQFLLKYITGDNLVKGSY
GFEAEFNKSQTSFHLKKPSALVSDSALYFCAVRD
>V152RF-ABGA01132346.1-trgv |(695, 1008)|2.89729158631|(0.997,0.968,0.946)|-1
SQKSSNLEGGTKSVTRPTRSSAEITCDLTVTNALYIHWYLHQEGKAPQRLLYYDVSTARD
VLESGLSPGKYYTHTPRRWSWILRLQNLIENDSGVYYCATWD
>V153RF-ABGA01154384.1-igkv |(10732, 11047)|2.53796627794|(0.949,0.971,0.757)|-1
CNGDIVLTQSPASLAMSPGQRATITCRASESVSVLGMTNLIHWYQQKPGQPPKLLIYRAS
NKDTGVPARFSGSGSGTDFTLTINPVEADDAANYYCMQSKNFP
>V154RF-ABGA01154386.1-igkv |(10957, 11257)|2.76737097099|(0.991,0.999,0.852)|-1
ARCDIQMTQSPSSLSASVGDRVTITCRASQGISSWLAWYQQKPGKAPKPLIYKVSSLESG
IPSRFSGSESGTEFTLTISSLQPEDFATYYCQQYNSVP
>V155RF-ABGA01161530.1-igkv |(226, 526)|2.99396400065|(0.997,1.000,0.997)|-1
IRCDIQMTQSPSSLSASVGDRVTITCRASQGISNYLNWYQQKPGKAPKLLIYRASNLQTG
VPSGFSGSGSGTDFTLTISSLQPEDIATYYCQQYDNLP
>V156RF-ABGA01164369.1-igkv |(1745, 2045)|2.04694692057|(0.940,1.000,0.560)|-1
IRCDIQMTQSPSSLSASVGDRVTITCRASQGISNYLNWYQQKPGKAPKLLIYRASNLQTG
VPPRFSGSRSGTDFTLTISSLQPKDIATYYCQQYDNLP
>V157RF-ABGA01180641.1-igkv |(2646, 2946)|2.98686400565|(0.993,0.998,0.996)|-1
ARCDIQMTQSPSSVSASVGDRVTITCRASQSISSWLAWYQKKPGKAPKLLIYKASSLQSG
VPSRFSGSGSGTEFTLTISSLQPEDFATYYCTQHNSYS
>V158RF-ABGA01180644.1-igkv |(8050, 8350)|2.99798400013|(1.000,0.998,1.000)|-1
ARGDIQMTQSPSSLSASVGDRVTITCRASQSISSYLAWYQQKPGKAPKPLIYAASNLQSG
VPSRFSGSGSGTEFTLTISSLQPEDFATYYCQQYKSDP
>V159RF-ABGA01180644.1-igkv |(24182, 24473)|2.9808400105|(0.991,0.997,0.993)|-1
DIQMTQSPSSVSASVGDRVTISCRASQSISSWLAWYQKKPGKAPKLLIYKASSLQSGVPS
RFSGSGSGTEFTLTISSLQPEDFATYYCTQHNSYP
>V160RF-ABGA01199503.1-igkv |(3988, 4290)|2.63731562408|(0.965,0.855,0.888)|-1
SSGDVVMTQSPLSLPVTLGQPASISCRSSQSLVHSDGNTYLNWFQQRPGQPPRRLIYKVS
NRDSGVPDRFSGSGAGTDFTLKISRVEAEDVGVYYCMQG
>V161RF-ABGA01203420.1-ighv |(3238, 3560)|2.97795641525|(1.000,0.994,0.985)|-1
VQCEVQLVESGGGLVQPGGSLRLSCAASGFTVSSNEMSWIRQAPGKGLEWVSTISRGGST
YYTDSVKGRFTISRDNSKNTLYLQMNSLRVEDTAVYYCARDTVKG
>V162RF-ABGA01203422.1-ighv |(651, 957)|2.00159660338|(0.983,1.000,0.549)|-1
VLSQVQLQESGPGLVKPSETLSLTCAVSGGSISSNYWSWIRQPPGKGLEWIGHIHYGGSN
YLNPSLKSRVTISVDTSKNQFSLKLSSVTAADTAVYYCAR
>V163RF-ABGA01223433.1-trbv |(4452, 4749)|2.97597252412|(0.998,0.982,0.997)|-1
PVNAGVTQTPKFHVLKTGQSMTLQCAQDMNHDYMSWYRQDPGMGLRLIHYSAGAGITDKG
EVPNGYNVSRLNTEDFQLRLESAAPSQTSVYFCASSY
>V164RF-ABGA01225869.1-trbv |(7999, 8296)|2.87951574615|(0.995,0.941,0.960)|-1
PLEAQVTQNPRYLITVTGKKLKVTCSQNMNHEYMSWYRQDPGLGLRQIYYSMNVEVVDKG
DVPEGYNVSRKEKRNFPLILESPSPNQTSLYFCASSL
>V165RF-ABGA01225869.1-trbv |(13353, 13650)|2.37735577028|(0.969,0.960,0.700)|-1
LVDVKVTQSSRYLVKRMGEKVFLECVQDMDHERMFWYRQDPGLGLRLIYFSYDVKMKEQG
DVPEGYSVSREKKGHFSLILESASTNQTSMYLCASSL
>V166RF-ABGA01245923.1-iglv |(7513, 7823)|2.00280210931|(0.850,0.623,0.753)|-1
SLSQPVQTQPSSHSACSGASARLTCTLSSGFSVGDFWISWYQQKPGNPPRYLLYYHSDSD
KGQASGVPSRISGSDDASANAGILHISGLQPEDEADYYCGT
>V167RF-ABGA01252206.1-iglv |(13174, 13484)|2.89329307797|(0.979,0.951,0.967)|-1
SWDQSALIQPPSMSGSPGQSVTISCTGTSSDVGGYNYVSWYQQHPGTAPKLMIYAVSNQP
SGVPNRFSGSKSGNTASLTISGLQAEDEADYYCSSYAGSNN
>V168RF-ABGA01252209.1-iglv |(753, 1069)|2.69643484282|(0.937,0.849,0.941)|-1
CVSPFPGSWAQSALIQPPSVSGSPGQSVTISCTGTSSNYVSWYQQHPGKAPKLMIYEVSK
RPSGVPDRFSGSKSGNTASLTISGLQAEDEADYYCSSYASSNN
>V169RF-ABGA01252210.1-iglv |(1732, 2038)|2.66016068927|(0.927,0.866,0.888)|-1
SVASYELTQPLSVSVAPGQTARITCGGNNIGSKAVQWYQQKPGQAPLLVIYSDSNRPSGI
PEQFSGSNLGNTATLTISGAQAGDEADYYCQVRDSSTAHS
>V170RF-ABGA01252215.1-iglv |(9236, 9539)|2.92525869849|(0.986,0.947,0.999)|-1
SEASYELTQPPSVSVSPGQTARITCSGDALPKKYAYWFQQKSGQAPVLVIYKDSKRPSGI
PERFSGSSSGTMATLTISGAQVEDEADYYCYSTDSSGNH
>V171RF-ABGA01252216.1-iglv |(11892, 12202)|2.75676332173|(0.973,0.914,0.903)|-1
SWAQSALTQPRSVSGSPGQSVTISCTGTSSDIGGYNAVSWHQQHPGKAPKLMIYDVSNRP
SGVPNRFSGSKSGNMASLTISGLQAEDEADYYCSSYAGSYT
>V172RF-ABGA01252218.1-iglv |(480, 780)|2.96178066996|(0.992,0.975,0.996)|-1
SVTSYELTQPHSVSVATAQTARITCGGNNIGSKAVHWYQQKPGQAPVLVIYDDSNQPSGI
PERFSGSNSGNTATLTISGAQAGDEADYYCQVWDSSKH
>V173RF-ABGA01252219.1-iglv |(2097, 2400)|2.95656408064|(0.990,0.987,0.980)|-1
SATSYELTQPPSVSVAPRQTARITCGGNNIGSKSVHWYQQKPGQAPVLVIYGDSNRPSGI
SERFSGSNSGNTATLTISRVEAGDEAVYYCQVWDSSSDY
>V174RF-ABGA01252219.1-iglv |(9992, 10295)|2.96989600501|(0.992,0.987,0.991)|-1
SATSYELTQPPSVSVAPRQTARITCGGNNIGSKSVHWYQQKPGQAPVLVIYGDSDRPSGI
SERFSGSNSGNTATLTISRVEAGDEAVYYCQVWDSSSDY
>V175RF-ABGA01252219.1-iglv |(17960, 18263)|2.87184532288|(0.996,0.910,0.995)|-1
SVVSSELTQDPAVSVTLGQTVKITCQGDSLRSYYASWYQQKPGQAPVLVIYGNNNRPSGI
PDRFSGASSGNTASLTITGAQAEDEADYYCNSWDGSGNH
>V176RF-ABGA01252219.1-iglv |(34167, 34477)|2.98356408064|(0.997,1.000,0.987)|-1
SWAQSALTQPPSVSGSPGQSITISCTGTSSDVGGYNYVSWYQQHPGTAPKLMIYDVSKRP
SGVPDRFSGSKSGNTASLTISGLQTEDEADYYCSSYRSGDT
>V177RF-ABGA01252219.1-iglv |(46613, 46923)|2.98998400013|(0.996,0.998,0.996)|-1
SWAQSALTQPASVSGSPGQSITISCTGTSSDVGGYNYVSWYQQHPGKAPKLMIYDVSKRP
SGVPDRFSGSKSGNTASLTISGLQAEDEADYYCSSYRSGST
>V178RF-ABGA01252219.1-iglv |(70767, 71077)|2.95111198542|(0.997,0.997,0.962)|-1
SWAQSALTQPPSVSGSPGQSITISCTGTSSDIGGYNAVSWYQQHPGKAPKLMIYEVSKRP
SGVPDRFSGSKSGNTASLTISGLQAEDEADYYCSSYRSGGT
>V179RF-ABGA01252220.1-iglv |(4657, 4954)|2.59756386684|(0.958,0.809,0.921)|-1
SVDSYELTQPPSVSVSPGQTARITCSGDVLGENYADWYQQKPGQAPVLVIYKDSERPPGI
PERFSGSTSGNTTTLTISSVLTEDKADYYCLSGDEDN
>V180RF-ABGA01252221.1-iglv |(70213, 70518)|2.32745643092|(0.959,0.682,0.951)|-1
SEASYELTQPSSVSVSLGQTARITCSGDVLAKKYAQWFQQKPGQAPVLVIYKDSERPSGI
PERFSSSSSGTTVTLTISGAQVEDEADYYCYSGDDNNLTV
>V181RF-ABGA01252221.1-iglv |(89127, 89430)|2.15480449483|(0.991,0.608,1.000)|-1
FEASYELTQPHSVSVSPGQMARITCSGEELPENYAYWYQQKPGQSPVLVIYKDSERPSGI
PERFSGSSSGTTVTLTISGVQAEDEADYYCQSADSSGTY
>V182RF-ABGA01252241.1-iglv |(4150, 4460)|2.36320763327|(0.838,0.700,0.937)|-1
SLSQSMLTQPASLSASPGASASLTCTLRSDINVGTYRIYWYQQKPGSPPRYLLRYKSDSD
KHQGSGVPSRFSGSKDASANAGLLLISGLQSEDEAGYYCMI
>V183RF-ABGA01252241.1-iglv |(8984, 9293)|2.93258443703|(0.992,0.952,0.995)|-1
SWAQSVLTQPPSASGTPGQRVTISCSGSSSNIGSNYVYWYQQFPGMAPKHLIYDNNQQPS
GVPDRFSGSKSGTSASLAISGLRSKDEADYYCAAWDNSLSG
>V184RF-ABGA01252243.1-igkv |(11516, 11822)|1.98506954877|(0.670,0.614,0.891)|-1
SLSQPVLTQSSSASASLGSSVKLTCTLSSGHSSYAIAWHQQQPGKAPRYLMRLEGSGSYN
KGSGIPDRFSGSSSGADRYLTISNLQSEDEADYYCQTWDS
>V185RF-ABGA01252243.1-iglv |(44201, 44510)|2.9188502378|(0.965,0.968,0.988)|-1
SWAQSVLTRPPSVSAAPGQKVTISCSGSSSNIGNYAVSWYQQLPGTAPKLLIYENNKRPS
GISDRFSGSKSGTSATLGITGLQTGDEADYYCSAWDSSLSA
>V186RF-ABGA01252243.1-iglv |(49802, 50111)|2.96016627772|(1.000,0.978,0.985)|-1
SWAQSVLTQPPSASGTPGQRVTISCSGSSSNIGSNYVYWYQQFPGMAPKLLIYDNNQRPS
GVPDRFSGSKSGTSASLAISGLRSEDEADYYCAALDNSLSG
>V187RF-ABGA01252248.1-iglv |(2689, 2998)|2.3333157328|(0.796,0.716,0.866)|-1
SVVQAGLTQPPSVSKGLRQTATLTCTGNSNNVGNQGAAWLQQHQGHPPKLLSYRNNNRPS
GISERFSASRSGNTASLTITGLQPEDEADYYCSAWDSSLSA
>V188RF-ABGA01252248.1-iglv |(12457, 12769)|2.92103383388|(0.993,0.943,0.995)|-1
SWAEVVFTQPHSVSGSPGQTVTISCTRSSGSIDNRYVYWYQQRPGSAPTTVIYDDNQRPS
GVPDRFSGSIDSSSNSASLTISGLKSEDEADYYCQSANDSHN
>V189RF-ABGA01252248.1-iglv |(17958, 18262)|1.50505303395|(0.874,0.642,0.541)|-1
SWAQSALTQEASVSGTVGQKVTLSCTGNSNNVGSYAVGWYQQISHCAPKTVMLGNSRPSG
IPDRFSGSKSGTTASLTISGLQPEDEANYYCSIWDYSLS
>V190RF-ABGA01252249.1-iglv |(2028, 2335)|2.58123177182|(0.957,0.773,0.980)|-1
SWANFMLTQPHSVSGSVGQKVIISCTRSSGSIGSYYVQWYQQHSGSAPTTVINKDNQRPS
GVPDRFSGSIDSSSNSASLTISGLKTEDEADYYCQSYDSS
>V191RF-ABGA01257764.1-igkv |(287, 587)|2.70213635854|(0.995,0.822,0.998)|-1
ATCDIQMTQSPFSLSASVGDRVTITSRASQGITNELAWYQQKPGKAPKFLIYSASSLQTG
VTSRFSGSGSGTDYTLTISSLQPEDVATYYCQRDYNTP
>V192RF-ABGA01257764.1-igkv |(8367, 8682)|2.59489081028|(0.992,0.870,0.859)|-1
SSGDVVMTQTPLSLPVTPGEPASISCRSSQSLLHSDGNTYLDWYLQKPGQSPQLLIYRVS
NRASGVPDRFSGSGSGTDFTLKISRVEAEDVGVYYCMQATKTP
>V193RF-ABGA01257764.1-igkv |(15129, 15444)|2.10229414489|(0.950,0.593,0.959)|-1
TSGDIAMTQTPLSLPVTPGEPASVSCRSSQSLLHSDGNTYLDWYLQKPGQPPQLLIYMLS
YRASGVSDRFSGSGSGTDFTLKISRVEAEDVGVYYCMQALQAP
>V194RF-ABGA01257772.1-igkv |(3885, 4185)|2.99899600001|(1.000,0.999,1.000)|-1
ARCAIQMTQSPSSLSASVGDRVTITCRASQGISNELSWYQQKPGQAPTLLIYAASSLQSG
VPSRFSGSGSGTDFTLTISSLQPEDVATYYCLQDYTTP
>V195RF-ABGA01257777.1-igkv |(9241, 9556)|2.32650217163|(0.981,0.678,0.975)|-1
SSGDIVMTQTPLSLPVTLGQPASMSCRSSQSLLDSDGYTYLDWYLQKPGQSPQLLIYEVS
NRASGVPDRFSGSGSGTDFTLKISRVEAEDVGVYYCMQALQVP
>V196RF-ABGA01259417.1-trbv |(2271, 2571)|2.94777334931|(0.985,0.999,0.966)|-1
HADTGVSQDPRHKITKRGQNVTFRCDPISEHNRLYWYRQTLGQGPEFLTYFQNEAQQEKS
GLFSDQFSAERPKGSFSTLKIQRTEQGDSAMYLCASSL
>V197RF-ABGA01276916.1-igkv |(1327, 1627)|2.99798400013|(1.000,0.998,1.000)|-1
ARCDIQMTQSPSSVSASVGDRVTITCRASQSISSWLAWYQQKPGKAPKLLIYKASNLQSG
VPSRFSGSGSGTDFTLTISSLQPEDFATYYCIQHSSTP
>V198RF-ABGA01277799.1-trbv |(1145, 1452)|2.17430322692|(0.909,0.630,0.903)|-1
HRDAGITQSPRYKVTETGRQVTLTCHQTWSHSYMFWYRQDLGHGLRLIYYSTATGITDKG
EVPDGYIVSRSKTENFLLTLESATRSQTSVYFCASSESTV
>V199RF-ABGA01277800.1-trbv |(311, 608)|2.00494810894|(0.886,0.546,0.973)|-1
HRDAGITQSPRHKITETGRQVTLTCHQTWSHSYMFWYRQDLGHGLRLIHYSLGVPDTNKG
EVSDGYTVSRSKTEDFPLTLESAASSQTSVYFCASSE
>V200RF-ABGA01277802.1-trbv |(3406, 3702)|2.31762348485|(0.836,0.729,0.802)|-1
PVQAGVTQSPTHLIKMRGQQVTLRCSPFSGHTSVSWYQQSLGQGPQFIFEYANELRRSKG
NFPDRFSGRQFRDYHSEMNVSALELGDSALYLCASRL
>V201RF-ABGA01277802.1-trbv |(6147, 6443)|2.9858720041|(0.998,0.994,0.994)|-1
PVDSGVTQTPKHLITATGQRVTLRCSPRSGDLSVYWYQQSLDQGLQFLIQYYNGEEREKG
NILERFSAQQFPDLHSELNLSSLELGDSALYFCASSV
>V202RF-ABGA01277803.1-trbv |(1353, 1650)|2.29473261757|(0.863,0.729,0.792)|-1
PVQAGVTQSPTHLIKMRGQQVTLRCSPFSGHTSVSWYQQSLGQGPQFIFEYANELRRSKG
NFPDRFSGRQFRDYHSEMNVSALELGDSALYLCASKV
>V203RF-ABGA01277806.1-trbv |(4577, 4874)|2.38912355582|(0.949,0.795,0.810)|-1
PVIAGITQAPRSQILAAGRSVTLRCTQDMRHNAMYWYRQDLGLGLRLIHYSNTAGTIGKG
EVPDGYSVSRANTDDFPLTLVSAIPSQTSVYFCASSD
>V204RF-ABGA01277808.1-trbv |(1866, 2166)|2.89851087214|(0.984,1.000,0.928)|-1
HTGAGVSQSPSNKVTEKGKDVELRCDPISGHTALYWYRQSLGQGLEFLIYFQGNSAPDES
GLPSDRFYAERSGGSISTLKIQHTQQEDSAMYLCASSL
>V205RF-ABGA01277809.1-trbv |(3151, 3448)|2.8477004391|(0.998,0.980,0.905)|-1
PLDTAVSQTPKYLVTQMGKKESLKCEQNLGHDAMYWYKQDSKKFLKIMFIYNNKEPILNE
TVPNRFSPNSPDKAHLQLHISSLELGDSAVYFCASSQ
>V206RF-ABGA01277809.1-trbv |(14738, 15029)|2.97097652411|(0.996,0.996,0.980)|-1
NAGVTQIPKFRVLKTGQSMTLQCAQDMNHDYMYWYRQDPGMGLRLIHYSAGEGTTTKGEV
PDGYNVSRLKKQNFLLGLESAAPSQTSVYFCASSY
>V207RF-ABGA01277810.1-trbv |(2890, 3187)|2.96160565256|(0.997,1.000,0.968)|-1
PVNAGVTQTPKFQVLKTGQSMILQCAQDMNHDYMYWYRQDPGMGLRLIHYSLDVGTTDKG
EVPDGYNVSRLNIQNFLLRLESAAPSQTSVYFCASSE
>V208RF-ABGA01277810.1-trbv |(5526, 5817)|2.90565800141|(0.998,0.996,0.930)|-1
NAGVTQTPKFRVLKTGQSITLQCAQDMNHNSMYWYRQDPGMGLRLIHYSVGAHSTEKGEV
PDGYNVSRLNTQNFLLRLKSAAPSQTSVYFCASSE
>V209RF-ABGA01277811.1-trbv |(730, 1043)|2.42940693133|(0.913,0.882,0.745)|-1
PMETGVTQTPRHLVMGMTNKKSLKCEQDLGHNAMYWYKQSAEKPPELMFVYNLKEPTENN
SVPSRFSPECPNSSHLFLHLHALQPEDSALYLCASSQDTALQ
>V210RF-ABGA01277815.1-trbv |(5061, 5368)|2.98294800078|(0.996,0.994,0.993)|-1
PVNAGVTQTPKFQVLKTGQSMTLQCAQDMNYDNMYWYRQDPGMGLKLIHYSVGEGTTDKG
EVPDGYNVSRLNRQNFLLRLESAAPSQTSVYFCASGYSTA
>V211RF-ABGA01277825.1-trbv |(768, 1064)|2.30094274154|(0.869,0.679,0.889)|-1
PVEAGVTQTPRCLIKTRGRQVTLSCSPISGHRSVSWYQQTPGQGLQFLFEYFSGTQREKG
NFPDRFSGHQFSNSRSEMNVSALELGDSALYLCASSL
>V212RF-ABGA01277826.1-trbv |(1650, 1966)|2.12467314717|(0.861,0.634,0.822)|-1
PVEAGVTQTPRCLIKTRGRQVTLSCSPISGHRSVSWYQQTPGQGPQFLFEYFSGTQREKG
NFPDRFSGHQFSNSRSEMNVSALELGDSALYLCASSLAQPYKA
>V213RF-ABGA01277827.1-trbv |(7144, 7457)|2.67696800013|(0.932,0.944,0.837)|-1
PIDTEVTQTPKHLVMGMTNKKSLKCEQHMGHRTMYWYKQKAKKPPELMFAYSYEKLSINE
SVPSRFSPECPKSSLLNLHLHALQPEDSALYLCASSQDTALQ
>V214RF-ABGA01277830.1-trbv |(3068, 3365)|1.55257284538|(0.506,0.807,0.552)|-1
STDTGITQTPKYLITAMGSKRTLKCEQHLGHDSMYWYTQKAKKSLEFMFYYNYKELIENE
TVPSHFTPECPDSSCLHLHVVALQPENSALYLYTSSQ
>V215RF-ABGA01277830.1-trbv |(4944, 5235)|2.66021407904|(0.900,0.879,0.884)|-1
PEVTQTPSHQVTQMGQEVILQCVPISNHLYFYWYRQILGQKIEFLVYFFNDKISEKSEIF
DDRFSAERPDGSNFTLKIQSTKLEDSAMYFCASSE
>V216RF-ABGA01277830.1-trbv |(8902, 9215)|1.83856010163|(0.577,0.798,0.726)|-1
PMDTRITQTPKHMVTAMGSKRMLKCEQHLGRDSMYWYRQKAKKSLEFMFYHSFKELIENE
TVPNHCTPECPDSSRLYLHVVALQPEIQLCIFCTSSQDTALQ
>V217RF-ABGA01277830.1-trbv |(10763, 11061)|2.33506945443|(0.894,0.729,0.831)|-1
TQTPSHQVTQMGQEVILQCVPIPNHLRFYWYRQILGQKVEFLVSFYSDKISEKSEIFDDR
FSVRRPDGSHFTLKIQSTKLEDSAMYFCASSEGTALQ
>V218RF-ABGA01277831.1-trbv |(8933, 9224)|1.97101238532|(0.921,0.856,0.581)|-1
PEVTQTPSHQVTQMGQEVILQCVPISNHLYFYWYRQILGQKVEFLVSFYSDKISEKSEIF
DDRFSVRRPDRSHFTLKIQSTKLEDSAMYFCASSE
>V219RF-ABGA01277831.1-trbv |(20035, 20348)|2.71465670404|(0.896,0.966,0.874)|-1
PIDTGITQTPKHLVMGMANKKSLKCEQHMGHKAMYWYKQKVKKPPELMFVYNYEELSINE
SVPSRFSPECPKSSLLNLHLHALQPEDSALYLCASSQDTALQ
>V220RF-ABGA01277831.1-trbv |(28336, 28627)|2.39840527849|(0.941,0.759,0.853)|-1
PEVTQTPSHQVTQMGQEVVLQCVPIPNHLNFYWYRQILGQKVEFLVYFYNDNISEKSEIF
DDRFSVERPNGSHFTLKIQSTKLEDSAMYFCASSE
>V221RF-ABGA01315458.1-igkv |(1340, 1640)|2.72897466861|(0.992,0.974,0.846)|-1
TTGEIVMTQSPATLSLSPGERATLSCRASQSVSNYLAWYQQKPGQAPRLLIYGASNRATG
IPARFSGSGSGTDFTLTISSLEPEDFAVYYCQQGNNLP
>V222RF-ABGA01321066.1-trav |(553, 839)|1.89056631845|(0.605,0.687,0.870)|-1
VSAAKNEVEQSPQDLTAQEGELITINCSYSVGTNALHWLQQHPGGGIVSLFMLSSGKKKN
GRLIATINIQEKHSSLHITASQPRDSAIYICAV
>V223RF-ABGA01321067.1-trav |(4468, 4758)|2.14278475449|(0.795,0.804,0.638)|-1
GTSSNSVKQTGQITVSEGASVTMNCTYTSAGYPTLFWYVQYPSKPLQLLQRETMENSKNF
GGRNIKDKNSPIVKYSVQVSDSAVYYCLLGDTVLK
>V224RF-ABGA01321068.1-trav |(6457, 6745)|2.97955704207|(1.000,0.981,1.000)|-1
LSGELKVGQNPLFLSTQEGKNYTIYCNYSTTSDRLYWYRQDPGKSLESLFVLLSNGAVKQ
EGRLMASLDTKARLSTLHITAAVHDLSATYFCAV
>V225RF-ABGA01321070.1-trav |(796, 1096)|2.99496000066|(0.999,1.000,0.996)|-1
FSMAQTVTQSQPEMSVQEAETVTLSCTYDTSESDYYLFWYKQPPSRQMILVIRQEAYKQQ
NATENRFSVNFQKAAKSFSLKISDSQLGDAAMYFCAYR
>V226RF-ABGA01321072.1-trdv |(3234, 3535)|2.67763550384|(0.988,0.981,0.818)|-1
SSMAQTVTQSQPEMSVQEAETVTLSCTYDTSESNYYLFWYKQPPSRQMILVIRQEAYKQQ
NATENRFSVNFQKAVKSFSLKISDSQLGDTAMYFCAFM
>V227RF-ABGA01321081.1-trav |(7033, 7323)|2.47593149429|(0.783,0.890,0.917)|-1
VSSEDKVVQSPLSLVVHEGDTVTLSCNYEVANFRSLLWYKQEKKAPTFLFMLTSSGIEKK
SGKLSSILDKKELFSILNITATQTRDSAIYLCAVE
>V228RF-ABGA01321082.1-trav |(2113, 2402)|1.87135060713|(0.717,0.524,0.918)|-1
ITGDAKTTQPNSMESNEEQPVHLPCNHSTISGTDYIHWYRQLPSQGPEYVIHGLTSNVNN
RMASLTIAEDRKSSTLILHRATLRDAAVYYCILR
>V229RF-ABGA01321090.1-trav |(1808, 2098)|2.20053152657|(0.719,0.738,0.974)|-1
TIIDAKTTQPTSMDCAEGRAANLPCNHSTISGNEYVYWFRQIHSQGPQYIIHGLKNNETN
EMASLIITEDRKSSTLILPHATLRDTAVYYCIVRV
>V230RF-ABGA01322683.1-igkv |(9303, 9618)|2.20574848941|(0.984,0.630,0.986)|-1
SSGDIVMTQTPLSLPVTLGQPASMSCRSSQSLLDSYGNTYLDWYLQKPGQSPQLLIYEVS
NRASGVPDRFSGSGSGTDFTLKISRVEAEDVGVYYCMQATQTP
>V231RF-ABGA01349559.1-trbv |(456, 747)|2.17114856922|(0.890,0.650,0.845)|-1
LMEADIYQTPRHCVIRTGKKITLECSQTMGHDKMYWSRSRNGITPHPLFLWVNSTEKGDL
SFESTVSRIRIERFPLTLESASPSHTSQYLCASSE
>V232RF-ABGA01354649.1-ighv |(173, 497)|2.06341074439|(0.779,0.797,0.604)|-1
AHSQVQLVQSEPEMKQPGASVKFSCKATGYTFTSYVMNWVRQAPGQGLEWVGWINTNTGN
PMYAQGFTGQFVFSMDTSVSTVYLQISSLKAEDMAVYYCLRDTVWK
>V233RF-ABGA01358461.1-trav |(1239, 1538)|2.2699030396|(0.756,0.716,0.966)|-1
VSSKQEVTQIPGALSVPEGENLVLNCSFTDRAIYNLQWFRQDPGKGLTSLLFIQSSQREQ
TSGRLNASLDKSSGRSTLSIAASQPGDSATYLCAVRHS
>V234RF-ABGA01360476.1-ighv |(4349, 4657)|2.82739727933|(0.950,0.949,0.930)|-1
AHSQVQLVQSGAEVKKPGTSVKISCKASGYTFTSYYMHWVRQAPGQGLEWIGRINPNSGN
TNYAQKFQGRVAMTRDTSISTAYMELRSLRSEDTATYYCGE
>V235RF-ABGA01360478.1-ighv |(1164, 1473)|2.77643192639|(0.918,0.890,0.995)|-1
AHSQVQLVQSGAEVKKPGASVKFSCKASGYTFTDYFMHWMLQAPGQRLEWMGWISAGNGN
TKYSQKFQGRVTITRDTSASTAYMELSSLRSEDTAVYYCVR
>V236RF-ABGA01360480.1-ighv |(4035, 4344)|2.65473742105|(0.953,0.939,0.826)|-1
VLSQVQLQESGPGLVKPLETLSLTCAVSGGSISSSNWWSWVRQPPGKGLEWIGEIYQSGS
TNYNPSLKSRVTISVDKSKNQFSLKLSSVTAADTAVYYCAR
>V0RF-AHZZ01030316.1-trgv |(38846, 39156)|1.50118372605|(0.856,0.583,0.581)|1
SQKSSNLEGKTKSITGPTGSPAEITCDLPGVSTLYIHWYLHQEGKAPQRLLYYEPYYFTV
VLESGISPGKYDTASTRKSWNLRLQNLIENDSGIYYCATWD
>V1RF-AHZZ01030316.1-trgv |(43861, 44177)|2.96466265282|(0.998,0.974,0.995)|1
SQKSSNLEGRTKSVTRPTGSSAEITCDLPEVSSFYIHWYLHQEGKAPQRLLYYDSSNSRV
VLESGISPGKYDTYGSTRRRNLRLILRNLIENDSGVYYCANWD
>V2RF-AHZZ01035404.1-trdv |(2190, 2491)|2.48654908529|(0.945,0.752,0.929)|1
SGMAQTVTQSQPEMSVREAETMTLSCTYDTSESNYYLFWYKQPPSRQMILIIRQEAYKQQ
NATENRFSVNFQKAAKSFSLKISDSQLGDAAMYFCAFM
>V3RF-AHZZ01035404.1-trav |(11684, 11986)|2.97323355494|(0.999,0.978,0.998)|1
SGMAQTVTQSQPEMSVQEAETVTLSCTYDTSDSDYYLFWYKQPPSRQMILIIRQEAYKQQ
NATENRFSVNFQKAAKSFSLKISDSQLGDAAMYFCAYRS
>V4RF-AHZZ01035404.1-trav |(35215, 35503)|2.96653206285|(0.990,0.981,0.996)|1
LSGELKVGQNPLFLSTQEGKNYTIYCNYSTASNRLYWYRQDPGKSLESLFVLLSNGAVKQ
EGRLMASLDTKARLSSLHITAALQDLSATYFCAV
>V5RF-AHZZ01035404.1-trav |(46165, 46455)|1.91643436857|(0.701,0.784,0.548)|1
ETGSNSVKQTGQITILEGASVTMNCTYTSVGYPTLFWYVQYPNKPLQLLQRQTMENSKNF
GVGNIKDKNSHIVKYSVQVSDSAVYCCLLRDTVLK
>V6RF-AHZZ01035404.1-trav |(52269, 52555)|1.54818111683|(0.576,0.461,0.892)|1
VSAAKNEVEQSPQDLTAQEGEFITINCSYSIGINSLHWLQQHPGGGIVSLFMLSSEKKKN
GRLIATINIQERHSSLHIAASQPRDSAIYICAV
>V7RF-AHZZ01040804.1-igkv |(26742, 27054)|2.42670142588|(0.971,0.991,0.708)|1
CNGDIVLTQSPASLAVSPGQRATITCRASESVSLLGINFIHWYQQKPGQPPKLLIYQASN
KDTGVPARFSGSGSGTDFTLTINPVEADDAANYYCLQSKDLP
>V8RF-AHZZ01040804.1-igkv |(44403, 44694)|2.97182866804|(0.996,0.979,0.998)|1
IVLTQSPTSMAVSQGERVTISCTASSSVSTSYLHWYQQKPGFPPRLLVYRTSSLASGVPA
RFSGSGSGTSYTLTISSMEAEDAANYYCQQGNSIP
>V9RF-AHZZ01042100.1-igkv |(22346, 22662)|2.37693918806|(0.944,0.688,0.981)|1
TSGDILLTQTPLSLPVTPAEPASISCRSSQSLLHSNGNTYLHWYLQKPGQSPQLLIYEVS
NRASGVPERFSGSGSGTDFTLKISLVEAEDVGVYYCMQTTQWP
>V10RF-AHZZ01042101.1-igkv |(1294, 1609)|2.59798046744|(0.944,0.820,0.901)|1
SSGDIVMTQTPLSLPVTLGEPTSISCRSSQSLVYSDGKTYLHWYLQKPGQSLQLLMYLVS
KRASGVPDRFSGSGSGTDFTLKISRVEAEDVGVYYCMQTLRSP
>V11RF-AHZZ01042101.1-igkv |(23302, 23620)|2.17773381177|(0.979,0.642,0.931)|1
SSGDIVMTQTPLFLPVTLGEPASISCRSSQSLLDSEDGNTYLDWYLQKPGQSPQLLIYEV
SNRASGVPDRFSGSGSDTDFTLKISRVEAEDVGVYYCMQALEFP
>V12RF-AHZZ01064615.1-ighv |(3396, 3696)|2.968900005|(0.988,0.993,0.988)|1
VQCEVQLVESGGGLVQPGGSLRLSCAASGFTFSSYAMQWVHQTPGKGLEWVSAIGPGGDT
YYADAVKGRFTISRDNAKNSLYLQMNSLRAEAVYYCAR
>V13RF-AHZZ01064617.1-ighv |(710, 1019)|2.58138776142|(0.830,0.864,0.994)|1
AHSQEQLVQSGAEVKKPGASVKVSCKASEYTFTSYVISWLRQAPGQGFEWMGGINPSDGS
TSYAQKFQDRVTITADMSTSTVYMELSSLRSEDTAVYYCAR
>V14RF-AHZZ01064625.1-ighv |(10295, 10604)|2.77830555626|(0.969,0.869,0.980)|1
VLSQVQLQESGPAVVKPSQTLSLTCAVSGGSISSGYDWSWIRQSPGKALEWIGYISYSGS
TNYNPSLKSRVTISRDTSKNQFSLKLSSVTAADTAVYYCAR
>V15RF-AHZZ01064628.1-ighv |(242, 554)|2.71606369872|(0.942,0.835,0.995)|1
VLSQVKLQQWGEGLVKLSETLSLTCAVYGGSISGYYYWSWIRQAPGKGLEWIGSIYSSGS
STYYNPSLKSRVTISTDTSKNQFSLKLSSVTAADSAVYYCAR
>V16RF-AHZZ01064636.1-ighv |(1268, 1580)|2.63202419712|(0.852,0.906,0.892)|1
VLSQVKLQQWGEGLVKPSETLSLTCAVYGGSISGYYYWSWIRQPPGKGLEWIGNIDGNSA
STNYNPSLKNRVTISKDTSKNQFSLKLSSVTAADSAVYYCAR
>V17RF-AHZZ01069449.1-ighv |(25634, 25949)|2.99899200002|(0.999,1.000,1.000)|1
VQCEVQLVESGGGLVQPGGSLRLSCAASGFTFSNYWMNWVRQAPGKGLEWVGFIKNKADG
GTAAYAESVKGRFTISRDDSKNTLYLQMNSLKTEDTAVYYCTR
>V18RF-AHZZ01069451.1-ighv |(7153, 7468)|2.98664403777|(1.000,0.995,0.992)|1
VQCEVQLVESGGGLVQPGRSLRLSCAASGFTFSNYYMHWVRQAQGKGLEWVGLIRNKANS
YTTEYAAAVKGRFTISRDDSKNTLYLQMSSLKTEDTAVYYCTT
>V19RF-AHZZ01069453.1-ighv |(22421, 22735)|2.46503550199|(0.958,0.747,0.927)|1
VFSQVTLKESGPALVKPTQTLTLTCTFSGFSLSTSGMRVSWIRQPPGKALEWLARIDWDD
DKYYSTSLKSRLTISKDTSKNQVVLTMTNMDPVDTATYYCARR
>V20RF-AHZZ01069455.1-ighv |(6977, 7286)|2.87533612255|(0.953,0.935,0.996)|1
VQCEVQLVESGGGLVQPGGSLRLSCAASGFTFSSYYMYWIRQAPGKGLQWVSAINTGGGS
TWYTDSVKGRFTISRENAKNTLYLQMNSLRAEDTAVYYCAK
>V21RF-AHZZ01069455.1-ighv |(20090, 20405)|2.39609616857|(0.969,0.695,0.994)|1
VQCEMQLVESGGGLAQPGGSLRLSCAASGFTFSDHYMHWVRQAPGKGPEWVGFIRNKAKG
GTAEYAASVKGRFTISRDDSKNVTYLQMNSLKTEDTAVYYCAR
>V22RF-AHZZ01069455.1-ighv |(33477, 33791)|2.34064129733|(0.971,0.758,0.842)|1
VLSQVTLKESGPALVKPTQTLTLTCTFSGFSLSTSGMCVSWIRQPPGKALEWLARIDWDN
DKYYSTSLKSRLTISKDTSKNQVVLTMTNMDPVDTATYYCARV
>V23RF-AHZZ01069455.1-ighv |(52071, 52380)|2.11704321502|(0.985,0.999,0.593)|1
VLSQVQLQESGPGLVKPSETLSLTCAVSGGSISSYWWGWIRQPPGKGLEWIGHIYGSSGS
NYLNPSLKSRVTISIDTSKNQLSLKLSSVTAADTAVYYCAR
>V24RF-AHZZ01069456.1-ighv |(9988, 10297)|2.99899600001|(1.000,1.000,0.999)|1
VQCEVQLVESGGGLVQPGGSLRLSCAASGFTFSSYGMHWARQAPGKGLEWVSAINTGGGS
TWYADSVKGRFTISRENAKNTLYLQMNSLRAEDTAVYYCAK
>V25RF-AHZZ01091598.1-ighv |(21923, 22232)|2.68829815127|(0.929,0.926,0.855)|1
AHAQVQLVQSGAQIKQPGASVKLSCKASGYTFTSYYMHWVRQAPGQGLEWIGLISPYNGN
KGYAQNFQGRVTITTDTSTSTGYMELSSLRSEDTAVYYCTR
>V26RF-AHZZ01091599.1-ighv |(2219, 2528)|2.99067605248|(1.000,0.991,1.000)|1
VQCEVQLVESGGGLSKPGGSLRLSCAASGFTFSDYNMDWVRQASGKGLEWVSSINTGGGS
TWYADSVKGRFTISRENAKNTLYLQMNSLRAEDTAVYYCAR
>V27RF-AHZZ01091599.1-ighv |(13841, 14150)|2.74779878432|(0.943,1.000,0.851)|1
VQCEVQLVESGGGLVQPGGSLRLSCAASGFTFSDNYMEWVRQAPGKGLQWVGQINPNGGT
TFLMDSVKGRFTISRDNAKNTLYLQTSSLNTEDTAVYYCTR
>V28RF-AHZZ01091600.1-ighv |(4723, 5037)|1.79489412938|(0.922,0.711,0.624)|1
VLSQVTLKESGPALVKPTQTLTLTCTFSGFSLTTSGMGVGWIRQPPGKALEWLAHIYWDD
DKRYSPSLKSRLTISKDTSKNQVVLTMTNMDPVDTATYYCARR
>V29RF-AHZZ01091603.1-ighv |(4407, 4716)|2.96664005313|(0.991,0.982,0.994)|1
VLSQVQLQESGPGLVKPSETLSLTCAVSGGSISSNYWNWIRQPPGKGLEWIGRIYGGSGS
TDYSPSLKSRVTISTDTSKNQLSLKLSSVTAADTAMYYCAR
>V30RF-AHZZ01097944.1-iglv |(5376, 5682)|2.97741612211|(0.998,0.987,0.993)|1
DSETVVTQEPSLSVSSGGTVTLTCGLSSGSVSTSNYPSWYQQTPGQAPRTLIYRTNTRPS
GVPDRFSGSILGNKAALTITGAQADDESDYYCMLYMGSGI
>V31RF-AHZZ01097949.1-iglv |(59447, 59759)|2.99899600001|(1.000,1.000,0.999)|1
SWAEVVFTQPHSVSGSPGQTVTISCTRSSGSIDSKYVQWYQQRPGSAPTTVIYEDNKRPS
GVPDRFSGSIDSSSNSASLTISGLNSEDEADYYCQSADGSYN
>V32RF-AHZZ01098200.1-trav |(876, 1169)|2.98993600205|(0.998,0.994,0.998)|1
VWSQQKEVEQNPGPLSVPEGATASLNCTYSNSAFQNFMWYRQYSRKGPQLLIYTYSSGNK
EEGRFTAQVDKSSKYISLFIRDSQPSDSATYFCAMS
>V33RF-AHZZ01098200.1-trav |(13982, 14270)|1.8905685503|(0.730,0.528,0.806)|1
PVFEEAPVLLRCNYSSSSVSVYLFWYVQYPNQGLQLLLKYLSGPTLVKGINGFEAEFKKS
ETSFHLRKPSTHISDTAEYFCAVSDTVLETAEEL
>V34RF-AHZZ01098200.1-trav |(35496, 35783)|2.9771523093|(0.996,1.000,0.982)|1
VNSQQGEEDPQTLSIQEGENATMNCSYKTSINNLQWYRQDSGRSLVQLILICSNEREKNS
GRLRVTLDTSKKSSSLLITASRAADTASYFCATD
>V35RF-AHZZ01098200.1-trav |(47312, 47603)|2.80204466822|(0.921,0.928,0.959)|1
RTNGDLVTQTEGPVTLPERAALTLNCTYQTSYSAFIFWYVQYPNKEPELLLKSSENQETN
SRGFQASHDKSDSSFHLEKPSVQLSDSAVYYCVLR
>V36RF-AHZZ01098200.1-trav |(50539, 50842)|2.92360004313|(0.970,0.978,0.976)|1
SSMAQKVTQAQTEISVVEKEDVTLDCVYETRENTYYLFWYKQPPSGELVFLIRRNSFDEQ
NEMNGRYDSNFQKSTSSFNLTITASQVVDSAVYFCALNE
>V37RF-AHZZ01098200.1-trav |(85982, 86269)|2.83564593441|(0.966,0.915,0.965)|1
LSGEDQVMQSPEALSLQEGESSSLNCSYTVSGLRGLFWYRQDPGKGPEFLFSLYSAGEEK
EKERLKATLTKKESFLHITGPKPEDSATYLCAVQ
>V38RF-AHZZ01098206.1-trav |(7994, 8291)|1.90950492092|(0.709,0.540,0.885)|1
VRGIQVEQSPPDLILQEGANSTLRCNFSATVNNLQWFHQNPWGQLINLFYIASGTKQNGR
LSATTVTTERYSLLHISSSQTTDSGIYFCAVKSQCSP
>V39RF-AHZZ01098942.1-ighv |(3874, 4183)|2.96860007999|(0.993,0.983,0.993)|1
VLSQVQLQESGPGLVKPSETLSLTCAVSGGSFSSNYWSWICQPPGKGLEWIGGIYGSGGS
TYYNPSLKNRVTISTDTSKNQFSLKLSSVTAADTAVYYCAR
>V40RF-AHZZ01098950.1-ighv |(183, 495)|2.99385601037|(1.000,0.994,1.000)|1
VLSQVQLQESGPGLVKPSETLSLTCAVSGYSISSGYYWGWIRQPPGKGLEWIGYIYGNSA
STYYNPSLKSRVTISKDTSKNQFSLKLSSVTAADTAVYYCAR
>V41RF-AHZZ01099970.1-iglv |(6343, 6653)|2.99899600001|(1.000,1.000,0.999)|1
SWAEVVFTQPHSVSGSPGQTVTISCTRSSGSIDSKYVQWYQQRPGSAPTTVIYNDDQRPS
GVPDRFSGSIDSSSNSASLTISGLKSEDEADYYCQSADSSS
>V42RF-AHZZ01099973.1-iglv |(28301, 28608)|1.59620201562|(0.808,0.505,0.667)|1
SASLTCTFSGGINVGDYTIHWYQQKPGSPPRYLLKYKSDSDKHQGSGVPSRFSGSKDASA
NTGILRISGLQSEDEADYYCAIGRSSGPHSDTHRWGSGTK
>V43RF-AHZZ01099973.1-iglv |(33051, 33358)|1.95985811044|(0.974,0.924,0.563)|1
SWAQSVLTQPPSVSAAPGQRVTISCSGSSSNIGRYYVSWYQQLPGAAPKLLIYDVNKRPS
GVPDRFSGSQSGTSTTLGITGLRPEDEADYYCLAWDNSLS
>V44RF-AHZZ01099973.1-iglv |(38400, 38710)|2.98771202074|(1.000,0.994,0.994)|1
SWAQSVLTQPPSVSGAPGQRVTISCTGSSSNIGAGYYVSWYQQLPGTAPKLLIYENNKRP
SGVSDRFSGSKSGTSASLAITGLQAEDEADYYCQSYDSSLS
>V45RF-AHZZ01100290.1-ighv |(204, 517)|2.77808270069|(0.979,0.875,0.967)|1
VQCEVQLVESGGGLVQPGRFLRLSCAASGFTFSNYYMHWAHQAQGRGLEWVSLMRKKANS
YTTEYAVSVKDRFTISRDDSKNTLYLQMNSLKTEDTAVYYCA
>V46RF-AHZZ01104241.1-igkv |(8110, 8412)|2.33602295702|(0.933,0.873,0.716)|1
STGDVVMTQSPLSLPVTPGEPASISCRSSQSLLHSSGNTYLSWFQQKPGQSARRLIYKVS
NRDSGVPDRFTGSGAGTDFTLKISRVEAEDVGVYYCMEG
>V47RF-AHZZ01104241.1-igkv |(24888, 25186)|2.76439853397|(0.991,0.851,0.998)|1
SKGEIVLTQSPAFRSVTLKEKVTITCQASQSIGSSLHWYQQKPDRSPKLLIKYASQSISG
VPSRFSGSGSGTDFTLTINSLEAEDAATYYCQQSSSL
>V48RF-AHZZ01104241.1-igkv |(53164, 53464)|2.96843912445|(1.000,0.975,0.996)|1
TSGEIVLTQSPATLSLSPGERATLSCRASQSVGSSLAWYQQKPGQAPRLLIYGASSRATG
IPDRFSGSGSGTEFTLTISSLEPEDFVVYYCQKYSSSP
>V49RF-AHZZ01104241.1-igkv |(58624, 58924)|2.9878720041|(0.996,1.000,0.992)|1
VRCDIQMTQSPSFLSASVGDRVTITCQASQSISNDLAWYQQKPGKSPTLLIYDATNLHTG
VPSRFSGSGSGADYSLTISSLELEDFAAYYCQQEYSYP
>V50RF-AHZZ01104243.1-igkv |(11240, 11555)|1.54579143152|(0.492,0.519,0.552)|1
SIGDIELTQTLHSLPVNPGEPASISCQSSQSLLHSDGKTYFYWFLRKPGQHPRLPIYWVS
NWNTGAPDRFSGSGAGTDFTLKISVVEAEDVGVYYYTQVTHWP
>V51RF-AHZZ01104243.1-igkv |(37856, 38148)|2.88136248136|(0.995,0.913,1.000)|1
SRGDIVMTQSPAFVSVTPGEKVTITCQASEGISNYLHWYQQKPDQAPKLFIQYASQSISG
VPSRFTGSGSGTDFTFTISSLEVEDAATYYCQQGN
>V52RF-AHZZ01104243.1-igkv |(54085, 54379)|2.9803601679|(0.999,0.987,0.995)|1
RGDIQMTQSPSSLSASVGDRVTITCRASQSFSSLAWYQQKPGKAPKLLIYSASSLQSGVP
SRFSGSKSGTDFTLTISSLQPEDVASYYCQQYYSYP
>V53RF-AHZZ01104243.1-igkv |(69226, 69518)|3.0|(1.000,1.000,1.000)|1
AKCDIQMTQSPSSLSASVGDRVTITCRASQTISSYLAWYQQKPGKVPKLLIYAASSLESG
VPSRFSGSGSGTEFTLTISSLQPEDFATYYCQQHN
>V54RF-AHZZ01104760.1-ighv |(306, 615)|2.51798920308|(0.993,0.749,0.988)|1
VQGEVQLVESGGGLAKPGGSLRLSCAASGFTFSDHYMHWVRQAPGKGLEWISAINSGGGS
TYYAESVKGRFTISRENAKNTLYLQMDSLRAEDTAVYYCAR
>V55RF-AHZZ01104761.1-ighv |(4083, 4398)|2.95754805197|(0.981,0.988,0.989)|1
VKCEAQLMESGGGLVQPGGSLRLSCAASGFTFSDHYMQWVRQAPGKGLEWVGLIRNKADG
ETTDYAASVKGRVTTSRDDSKSITYLQMNNLKTEDTAVYYCAR
>V56RF-AHZZ01104763.1-ighv |(4374, 4683)|2.99593600205|(1.000,0.996,1.000)|1
VQCEVQLVESGGGLAKPGGSLRLSCAASGFTFSDYYMDWVRQAPGKALEWVSGISNTGGS
TWYADSVKGRFTISRENAKNTLYLQMSSLRAEDTAVYYCAR
>V57RF-AHZZ01105091.1-igkv |(457, 757)|2.98159608|(0.997,0.998,0.987)|1
ARCDIQMNQSPSSLSASVGDTATITCRASQGISNNLAWYQQKPGKAPKLLIYAASSLESG
VPSRFSGSGSGTEFTLTISSLQPEDFAAYYCQQYNSLP
>V58RF-AHZZ01107544.1-trav |(5301, 5591)|2.98780001921|(0.998,0.999,0.991)|1
VNGENVEQHPSTLSVQEGDSSVIKCTYSDSASNYFPWYKQELGKGPQFIIDIRSNEHEKK
DQRITVLLNKTAKHFSLHITETQPGDSAVYFCAAS
>V59RF-AHZZ01107544.1-trav |(27803, 28091)|2.97560803841|(0.992,0.985,0.999)|1
VWSQQKVEQSSGPLSVPEGAIASLNCTYSDSGSQSFFWYRQYSGQSPELLMSTYSSGDKE
DGRFTAQLNRASQYVSLLIRDSQLSDSATYLCAV
>V60RF-AHZZ01107544.1-trav |(34317, 34614)|2.41236522491|(0.983,0.825,0.811)|1
GTRAQSVTQLDSQVSVSEGVPVLLRCNYSSSFSPTLFWYVQYPNQGLQLLLKYISGTTLV
KGINGFEAEFKKSETSFHLTKASAHVSDAAEYFCAVN
>V61RF-AHZZ01107544.1-trav |(53747, 54040)|2.99393200206|(0.999,1.000,0.995)|1
VSRGESVGLHLPTVSVQEGDNSVINCTYSDSASDYFLWYKQESGKGPQSIIDIRSNMAKR
QGQRLTVLLNKTMKHLSLQIAATEPGDSAVYFCAEN
>V62RF-AHZZ01107545.1-trav |(4983, 5284)|2.94957605748|(0.982,0.991,0.977)|1
SGIAQKITQTQPAMFVQEKEAVTLDCTYDTSDQNYGLFWYKQPSSGEMIFLILQMSYDKQ
NATEGHYSLNFQKARKSVNLVISASQVGDSATYFCAMR
>V63RF-AHZZ01107545.1-trav |(23299, 23593)|2.99593600205|(1.000,1.000,0.996)|1
RTRGDSVTQMEGPVTLSERAFLTINCTYTATGYPSLFWYVQYPGEGPQLLLKATKTDEKG
SNKGFEATYRKETTSFHLKKDSVQESDSAVYFCALS
>V64RF-AHZZ01108247.1-ighv |(744, 1053)|2.76090142457|(0.980,0.880,0.945)|1
AHSEVQLVQSGSEVKKPGATVKISCKASGYTFIDYYLHWVRQAPGKGLEWMGGVDPEDGE
ADYAQKFQGRVTITADTSTDTAYMELSSLRSEDTAVYYCAR
>V65RF-AHZZ01109397.1-igkv |(45, 345)|3.0|(1.000,1.000,1.000)|1
ARCDIQMTQSPSSLSASVGDRVTITCRASQGISSYLNWYQQKPGKAPKLLIYDATTLQSG
VPSRFSGSGSGTEFTLTISSLQPEDFAVYYCQQRNSYP
>V66RF-AHZZ01109397.1-igkv |(20176, 20476)|2.99699200002|(0.999,1.000,0.998)|1
ARCDIQMTQSPSSLSASVGDRVTITCQASQGISSWLSWYQQKPGKAPKLLLYKASGLQSG
VPSRFSGSGSGTEFTLTISSLQPEDFATYYCQQFSSAL
>V67RF-AHZZ01109398.1-igkv |(3225, 3525)|2.98867205249|(0.999,0.990,1.000)|1
TTGEIVMTQSPATLSLSPGERATLSCRASQSVSSRLAWYQQKPGQAPRLLIYDASSRATG
IPDRFSGSGSGTEFTLTISSLEPEDVGVYYCQQSYSWP
>V68RF-AHZZ01110760.1-ighv |(1676, 1985)|2.69620584607|(0.910,0.956,0.852)|1
VLSQVQLQESGPGLVKPSETLSLTCAVSGASISSNWWSWIRQAPGKGLEWIGEINGNSGS
TNYNPSLKSRVTISKDASKSQFSLKLSSVTAADTAVYYCAR
>V69RF-AHZZ01111404.1-ighv |(10609, 10903)|1.82253687179|(0.942,0.891,0.516)|1
AQSQVQLVQSGAEVKKPGASVKVSCKASGYTFSTYAISWVRQAPGQGLEWMGGIIPLVGI
TNYAQKFQGRDTSTSTAYMELSSLRSEDTAVYYCAR
>V70RF-AHZZ01111405.1-ighv |(9460, 9769)|2.74035271978|(0.986,0.937,0.875)|1
AHSQVQLVQSGAEVKQPGSSVKVSCKASGYTFTNSAMQWVRQTPGQGLEWIGWIIIGNGN
TNYAQKFQGRVTITRDTSTSTGYMELSSLRSEDTAVYYCAA
>V71RF-AHZZ01113072.1-ighv |(329, 638)|2.26975691616|(0.998,0.946,0.676)|1
VQCEVQLVESGGGLVQPGVSLRLSCAASGFTFSSTRMNWIRQAPGKKLEWVADIKYDGSE
KYYVDSVKGRFTISRDNAKNSLSLQMNSLRAEDTAVYYCVR
>V72RF-AHZZ01117753.1-igkv |(3232, 3532)|2.98008440501|(0.998,1.000,0.983)|1
ARCDIQMTQSPSSLSASVGDRVTITCRASQGISTYLNWYQQKPGKAPKLLIYAASRLESG
VPPRFSGSGSGTEFTLTISSLQPEDFATYYCLQYKSDP
>V73RF-AHZZ01117754.1-igkv |(5922, 6221)|2.99899600001|(1.000,1.000,0.999)|1
TTGEIVMTQSPATLSLSPGERATLSCRASQSVSSYLAWYQQKPGQAPRLLIYGASSRATG
IPDRFSGSGSGTEFTLTISSLEPEDVGVYYCQQYNNWN
>V74RF-AHZZ01117754.1-igkv |(31202, 31502)|2.20813681562|(0.717,0.824,0.712)|1
TTGEIVMTQSPATLSLSPGEGATLSCRASQSVGSYLAWYQQKPGQAPKLLIHSAYFRATG
IPDRFSGSGSRTEFTLTISSLEPEDVGVYHCQQYNDLP
>V75RF-AHZZ01123648.1-ighv |(7375, 7669)|1.82253687179|(0.942,0.891,0.516)|1
AQSQVQLVQSGAEVKKPGASVKVSCKASGYTFSTYAISWVRQAPGQGLEWMGGIIPLVGI
TNYAQKFQGRDTSTSTAYMELSSLRSEDTAVYYCAR
>V76RF-AHZZ01124687.1-ighv |(302, 609)|2.54876656494|(0.975,0.966,0.767)|1
AHAQVQLVQSGPEVKQPGASVKVSCKASGYTFTSYGMNWVRQAHGQRLEWMGWINTDSGN
PTYAQGFKERFTFSMDTSISTAYLQISSLKAEDTAVYYCA
>V77RF-AHZZ01129142.1-ighv |(1012, 1321)|2.99799600001|(0.999,0.999,1.000)|1
VLSQVQLQESGPGVVKPSETLSLTCAVSGGSISSYWWGWIRQPPGKGLEWIGYIYGSGSS
TNYNPSLKSRVTISKDTSKNQFSLKLSSVTAADTAVYYCAR
>V78RF-AHZZ01130977.1-trav |(3875, 4175)|2.1314081881|(0.829,0.651,0.780)|1
FSVAQKVTQAQSSVSMPVGKAVTLNCQYETSWWSYYLLWYKQFPGKEMIFLIRQGSSEQN
ARNGRYSVNFQKAASSIALTISALQLEDSATYFCALWE
>V79RF-AHZZ01143621.1-igkv |(14221, 14507)|2.72005121372|(0.887,0.907,0.938)|1
IVMTQSPATLSLSPGERATLSCRASQSVSSRLAWYQQKPGEAPRLLIYDASSRATGIPAR
FSGSGSGTDFTLTISSLEPEDVAVYFCQQESNW
>V80RF-AHZZ01150255.1-ighv |(7064, 7379)|2.92298089753|(0.956,0.991,0.984)|1
VQCEVQLLEYGGGLVQPGRSLRLSCAVSGFTFSDHYMSWVRQAPGKGPEWVGFMRNKANG
GRTEYAASVKGRFTISRDDSKSTASLQMSSLKTEDTAVYYCAT
>V81RF-AHZZ01169213.1-igkv |(5365, 5663)|2.3912188184|(0.935,0.712,0.925)|1
TTGEIVMTQSPATLALSPGERATLSCRASQSVSSYLAWYQQKPGQAPRLLIYGASSRATG
IPDRFSGSGSGTEFTLTISSLEPEDVGVYFCLQSSNW
>V82RF-AHZZ01176978.1-igkv |(12153, 12453)|3.0|(1.000,1.000,1.000)|1
ARCDIQMTQSPSSLSASVGDKVTITCHASQGISSWLSWYQQKPGKAPKLLIYKASSLQSG
VPSRFSGSGSGTDYTLTISSLQPEDFATYYCQQDSSSP
>V83RF-AHZZ01198213.1-trav |(10234, 10524)|2.9793601679|(0.996,1.000,0.984)|1
MSRGEDVEQSLFLSVREGDISVINCTYTDSSSTYLYWYKQEPGAGLQLLTYILSNMDLKR
DQRVTVLLNKKDKHLSLRIADTQTEDSAIYFCAES
>V84RF-AHZZ01198214.1-trav |(2660, 2948)|2.00071848184|(0.963,0.885,0.595)|1
VKSQKIEQNSEALNIQEGKTATLTCNYTNYSPSYLQWYRQDPGRGPVFLLLIRENEKEKW
KERLKVTFDTTLKQSLFHITASQPADSATYLCAL
>V85RF-AHZZ01198214.1-trav |(53657, 53950)|2.99799600001|(0.999,0.999,1.000)|1
GSGKNQVEQSPQSLIILEGKNCTLQCNYTVSPFSNLRWYKQDTGKGPISLTIMTFSENTK
SNGRYTATLDADTKQSSLHITAAQLSDSASYICVVS
>V86RF-AHZZ01198216.1-trav |(1076, 1382)|2.98128017622|(1.000,0.994,0.988)|1
VWSQQKEVEQDPGPFSVPEGATVTFNCTYSNSASQSFFWYRQDSRKEPKLLMSVYSSGNE
DGRFTAQLNRASQYISLLIRDSQLSDSATYLCAVYTQCSP
>V87RF-AHZZ01198216.1-trav |(6535, 6832)|2.72737229451|(0.995,0.852,0.963)|1
GTRAQSVTQLDSQVSVSEGVPVLLRCNYSSSVSPYLFWYVQYPNQGLQLLLKYTSGTTLV
KGINGFEAEFKKSETSFHLTKASAHVSDAAEYFCAVN
>V88RF-AHZZ01035404.1-trdv |(86530, 86836)|1.84690834242|(0.715,0.550,0.688)|-1
RGMLCDKVTQSSLDQMVASGSEVVLLCTYDSTYSDPGLFWYRIRPDYNFQFVFYGDKSRS
HGSYFAKGRFSVKHLLTQKAFHLVISPVSTEDSATYYCAM
>V89RF-AHZZ01040804.1-igkv |(3190, 3490)|2.81183400054|(0.915,0.971,0.941)|-1
TTGQVILTQSPATLSLSPGERATLSCRASQSVSNYLAWYQQKPGQAPRLLIHSASSRATG
IPDRFSGSGSGTEFTLTISSLEPEDVGVYHCYQYYSGY
>V90RF-AHZZ01040804.1-igkv |(12121, 12409)|1.97774514901|(0.629,0.719,0.872)|-1
TILTQSAAFVSATPGDKVTISCKASQDIDDDMNWYQLEPGEAPKLIIKDATTLVSGIPPR
FSGSGYGTDFTLTINNVESEDAAYYFCLQHDNFP
>V91RF-AHZZ01040807.1-igkv |(28694, 28982)|1.76475458883|(0.610,0.532,0.845)|-1
TILTQSPAFVSATPGDKVTISCRAGQDIDDDMNWYQQEPGEAPKLIIKDATTLVSGIPPQ
FSGSGYGIDFTLTINSMKSEDTAYYFCQQRDNTP
>V92RF-AHZZ01040807.1-igkv |(39921, 40221)|2.97049912241|(0.999,0.974,1.000)|-1
AKCDIQMTQSPTFLSASVGDRVTIACRASQSIHKGLAWYQQKPGKAPKLLISYASNLYTG
VPSRFSGSGSGTDFTLTISSLQPEDAATYYCFQYNSYP
>V93RF-AHZZ01040808.1-igkv |(17035, 17353)|2.96940127932|(0.997,0.977,0.997)|-1
ACGDIVMTQSPDSLAVSLGERVTINCKSSQSLLYSSNNKNYLAWYQQKPGQTPKLLISWA
STRESGVPNRFSGSGSGTDFTLTISGLQAEDVAVYYCQQHYSTP
>V94RF-AHZZ01042076.1-igkv |(7808, 8108)|2.68424553967|(1.000,0.995,0.816)|-1
TRCAIQMTQSPSSLSASVGDRVTITCRASQSIGSNLAWYQQKPGKVPKLLIYAASTLQSE
VPSRFSGSGSGTDFTLTISSLQPEDVATYYCQKCDSAP
>V95RF-AHZZ01042077.1-igkv |(2202, 2517)|2.52601987182|(0.993,0.753,0.986)|-1
SSGDIVMTQTPLSLPVTLGEPASISCRSSQSLLSSNEYNYLNWYLQKPGQSPQLLIYYGS
NRASGVPDRFSGSGSGTDFTLKISRVEAEDVGVYYCMQALQTP
>V96RF-AHZZ01042078.1-igkv |(13394, 13694)|2.97340170998|(0.980,0.997,0.999)|-1
ARCDIQMTQSPSSLSASVGDRVTITCRASQNIYSNLAWYQQKPGKAPKPLIYYASSLETG
VPSRFRGSGSGTDYTLTISSLQPEDIATYYCQQYNNSP
>V97RF-AHZZ01042078.1-igkv |(35394, 35709)|2.49777751068|(0.963,0.853,0.814)|-1
SSGDVVMTQSPLTLPVTPGQPASISCRSSQSLVHSDGNTYLSWYQQKPGQPPRLLIYKVS
NRYSGVPDRFSGSGAGTDFTLKISRVEAEDVGVYYCMQGTKVP
>V98RF-AHZZ01042078.1-igkv |(45757, 46072)|2.63824521573|(0.978,0.887,0.860)|-1
SSGDIVMTQTPLSLPVTPGEPASISCRSSQSLLHSDGYTYLDWYLQKPGQSPQLLIYGGS
NRASGVPDRFSGSGSGTDFTLKISKVEAEDVGVYYCMQHRALP
>V99RF-AHZZ01042079.1-igkv |(5782, 6096)|1.81358508722|(0.953,0.781,0.594)|-1
SSGDVVLTQTPLSLPVTPGEPASISCRSSQSLLHSNGNTYLDWYLQKPGQSPRLLIYKVT
NRESGVPDRFSGSGSGTDFTLKISRVEPEDVGVYYCMQGTKAP
>V100RF-AHZZ01042080.1-igkv |(4422, 4722)|2.97323355494|(0.999,0.978,0.998)|-1
ARCDIQLTQSPSSLSASVGDRVTISCRTSQNIYSNLAWYQQKPGKTPKLLIYAASSLQSG
IPSRFSGSGSGTDFTLTISSLQPEDVATYYCQHGYGTP
>V101RF-AHZZ01042080.1-igkv |(19769, 20084)|2.317913881|(0.981,0.681,0.960)|-1
SSGDIVMTQTPLSLPVTPGEPASISCRSSQSLLHSNGNTYLYWYLQKPGQPPRLLIYRVS
NRFSGVPDRFSGSGSGTDFTLKISRVEAEDVGVYYCMQALQNP
>V102RF-AHZZ01042080.1-igkv |(24756, 25071)|2.59928508695|(0.968,0.820,0.909)|-1
SSGDIVMTQTPLSLPVTPGEPASISCRSSQSLLHSNGNTYLHWYLQKPGQSPKLLIYGGS
NRASGVPDRFSGSGSGTDFTLKISKVEVEDVGVYYCVQAIAFP
>V103RF-AHZZ01042083.1-igkv |(18979, 19279)|2.97345609036|(0.986,0.992,0.996)|-1
ARCDIHMTQSPSSLSASVGDRVTITCRASQGITDDLAWYQQKPGETPKLLIYEASSLQSG
IPSRFSGSGSGTEFTLTISSLQLNDSATYYCQHYYSYP
>V104RF-AHZZ01042083.1-igkv |(31507, 31813)|2.63414044178|(0.965,0.802,0.968)|-1
IMMTQTPLSLPITPGEPASISCRSSQSLLDSDDGYTYLDWYLQKPGQSPQPLIYFVSSWA
SGVPDRFSGSGSGTDFTLKISRVEAEDVGVYYCMQCIEFI
>V105RF-AHZZ01042084.1-igkv |(28167, 28465)|2.97287023728|(1.000,0.998,0.977)|-1
ARCDIQLTQSPSSLSASVGDRVTITCQASQGISNNLAWYQQKPGKVPKLLIYKASTLQSG
VPSRFSGSGSGTDFTLTISSLQPEDFATYYCQYGYGI
>V106RF-AHZZ01042085.1-igkv |(3468, 3783)|2.76939388998|(0.998,0.884,0.948)|-1
TSGDIVMTQTPLSLPVSPGEPASISCRSSQSLLHSDGYTYLDWYLQKPGQSPQLLIYLVS
NRASGVPDRFSGSGSGTDFTLKISRVEAEDVGVYYCEQGTQLP
>V107RF-AHZZ01042085.1-igkv |(40087, 40402)|2.520464082|(0.952,0.827,0.846)|-1
TSGDIVMTQTPLSLPVSPGEPASISCRSSQSLLHSGGKTYLYWYLQKPGQSPQLLIREVS
NRASGVPDRFSGSGSGTDFTLKISPVEAEDVGVYYCMQGIQLP
>V108RF-AHZZ01042085.1-igkv |(49587, 49887)|2.99899600001|(1.000,0.999,1.000)|-1
ARCDIQMTQSPSSLSASVGDRVTITCRASQGITNDLAWYQQKPGETPKLLIYEASSLQSG
IPSRFSGSGSGTDFTLTISSLQPEDFATYYCQHYYSTP
>V109RF-AHZZ01042091.1-igkv |(7298, 7613)|2.98672803289|(0.999,0.991,0.997)|-1
TSGDIVMTQTPLSLSVTPGEPASISCRSSQSLLHSNGNTYLHWYLQKPGQSPQLLIYLVS
NRASGVPDRFSGSGSGTDFTLKISRVEAEDVGVYYCMQGIQLP
>V110RF-AHZZ01042093.1-igkv |(2142, 2442)|2.20784652089|(0.901,0.628,0.944)|-1
ARCAIQMTQSPSSPSATVGDRVTTTCRVSQSINNNLAWYQQKPGKTPKLLICEASSLQSG
IPSRFSGSGSGTDFTLTISSLQSEDVATYFCQHGYSYP
>V111RF-AHZZ01042093.1-igkv |(34873, 35173)|2.97723755493|(1.000,0.979,1.000)|-1
ARCDIQMTQSPSSLSASVGDRVTITCRASQGINKELDWYQQKPGKAPTLLIYAASSLQTG
VSSRFSGSGSGTDFTLTISSLQPEDVATYYCQQDYTTP
>V112RF-AHZZ01042093.1-igkv |(53999, 54314)|2.70238439732|(0.959,0.870,0.913)|-1
SSGDIVMTQTPLSLPVTPGEPASISCRSSQSLLHSNGYTYLYWYLQKPGQSPQLLMYFAS
YRASGVPDRFSGSGSGTDFTLEISRVEAEDIGVYYCMQGTQLP
>V113RF-AHZZ01042093.1-igkv |(71557, 71872)|2.35431455471|(0.975,0.726,0.897)|-1
YSGDIVMTQTPLSLPVIPGEPASISCRSSQSLLDSDGYTCLDWYLQKPGQSPQLLIYEVS
NRASGVPDRFSGSGSVTDFTLKISRVEAEDVGVYYCMQSIEFP
>V114RF-AHZZ01042093.1-igkv |(93881, 94199)|1.91965340591|(0.783,0.777,0.552)|-1
SSGDIVMTQTPLSLLVTPGEPASVSSCRCSQSLPYRGEKTYLYWSLQKPGQSPQLLIYFV
SNRASRVPDRFSGSGSDTDFTLKISWVETEDVGIYYRMENIELP
>V115RF-AHZZ01042093.1-igkv |(102084, 102402)|2.7839563944|(0.994,0.911,0.925)|-1
SSGDIVMTQTPLSLPVTPGEPASISCRSSQSLLDSDDGNTYLDWYLQKPGQSPQLLIYEV
SNRASGVPDRFSGSGSDTDFTLKISRVEAEDVGVYYCMQSTEYP
>V116RF-AHZZ01042093.1-igkv |(120004, 120320)|2.42319526977|(0.882,0.728,0.906)|-1
TSGDILLTQTPLSLPVTPGEPASISCRSSQSLLHSNENTYLHWYLQKPGQSPQLLICEVS
NRASGVPDRFSGSGSDTDFTLKINLVEAEDVGVYYCMQTTQWP
>V117RF-AHZZ01042093.1-igkv |(124902, 125217)|2.66157731572|(0.952,0.820,0.957)|-1
SSGDIVMTQTPLSLPVTLGEPTSISCRSSQSLVYSDGKTYLHWYLQKPGQSPQLLMYLVS
NRASGVPDRFSGSGSGTDFTLKISRVEAEDVGVYYCMQTLRSP
>V118RF-AHZZ01042093.1-igkv |(128335, 128650)|2.46445252208|(0.916,0.772,0.866)|-1
SSGDIVMTQTPLSLPVIPGEPASISCRSSQSLLHSDGYTYLHWYLQKPGQSPQLLIYLGS
NCASVVPDRFSGSGSGTDFTLKISRVEAEDIGIYYRMQNLQIP
>V119RF-AHZZ01042093.1-igkv |(133001, 133301)|2.96807231762|(0.983,0.989,0.997)|-1
ARCDTQMTQSLSSLFASVGDRVTITCRASQGINNELAWYQQKPGKAPTLLLYSGSSLHTG
VPSQFSGSGSGTDFTLTISSLQPEDVATYYCRQDYTTP
>V120RF-AHZZ01042093.1-igkv |(141218, 141533)|2.38459743421|(0.987,0.725,0.927)|-1
SSGDIVMTQTPLSLPVTPGEPSSISCRSSQSLLDSYGYTNLNWYLQKPGQSPQLLIYEVS
NRASGVPDRFSGSGSGTDFTLKISKVEAEDVGVYYCMQTPQTP
>V121RF-AHZZ01042093.1-igkv |(150847, 151147)|3.0|(1.000,1.000,1.000)|-1
ARCDIQMTQSPSSLSASVGDRVTITCQASQGISNNLNWYQQKPGKTPKLLIYAASSLQSG
IPSRFSGSGSGTDFTLTISSLQPEDFATYYCQQRYSAP
>V122RF-AHZZ01042093.1-igkv |(165765, 166067)|2.6767946121|(0.998,0.840,0.945)|-1
TSGDIVMTQTPLSLPVSPGEPASISCRSSQSLLHSNGNTYLHWYLQKPGQSPQLLIYEVS
NWASGVPDRFSGSGSGTDFTLKISRVEAEDVGVYYCEQG
>V123RF-AHZZ01042093.1-igkv |(173599, 173899)|2.98974003277|(0.999,1.000,0.991)|-1
ARCDIQMTQSPSALSASVGDRVTISCRASQNIYSGLAWYQQKPGKAPKLLIYDASGLQSG
IPSQFSGSGSGTDFTLTISSLQPEDSATYYCQHYYDTP
>V124RF-AHZZ01042094.1-igkv |(1120, 1438)|2.50917763114|(0.993,0.742,0.997)|-1
TSGDIVMTQTPLSLPVTPGEPASISCRSSQSLFNSDYANTYLDWYLQKPGQSPQLLIYML
SNRASGVPDRFSGSGSGTDFTLKISRVEAEDVGVYYCMQSIEYP
>V125RF-AHZZ01044061.1-trav |(5500, 5816)|2.53480640148|(0.878,0.815,0.859)|-1
QLVTQPEDQVTVAERNPLTVKCTYSVSGNPYLFWYVQYPNQGLQFLLKYITGDNLVKGSY
GFEAEFNKSQTSFHLKKPSALVSDSALYFCAVRDTLIGAAGGA
>V126RF-AHZZ01044067.1-trav |(5751, 6054)|1.92210820186|(0.777,0.685,0.605)|-1
MCLVLVTTGQNIDQPTEMTAMEGAIVQINCTYQTSGFNGLSWYQQHDGEAPTLLSYNVLD
GLEEKGRFSSFLSNSKRYSYLLLKELQVKDSASYLCAVR
>V127RF-AHZZ01044070.1-trav |(1428, 1737)|1.87374465268|(0.870,0.764,0.576)|-1
TIMYLAIGTAGQSLEQPSEVTAVEGAIVQINCTYQTSRFDGLSWYQQRDGGAPTFLSYNA
LDGLEERGHFSSFLSRSDSYGYLLLQELQMKDSASYFCAVR
>V128RF-AHZZ01067647.1-trbv |(19172, 19469)|2.47423874129|(0.968,0.964,0.736)|-1
PLEAQVTQNPRYLITVTGKKLTVTCSQNMNHDYMSWYRQDPGLGLRQIYYSSNVELVDKG
DIPEGYNVSRKEKRNFPLILESPSPSQTSLYFCASSL
>V129RF-AHZZ01067647.1-trbv |(24494, 24801)|2.98796400065|(0.997,0.997,0.994)|-1
LVDVKVTQSSRYLIKRTGEKVFLECVQDMDHERMFWYRQDPGLGLRLIYFSYDVKVNEKG
DIPEGYSVSREKKERFSLILGSASTNQTSMYLCASSLSTA
>V130RF-AHZZ01067647.1-trbv |(37999, 38302)|2.43273683895|(0.868,0.724,0.942)|-1
SVFSAVVSQKPSRDVCQRGTSVTIQCQVDSQLTMMFWYRQQPGLSMTLIATANQGSEATY
ESGFVIDKFPISRPNLTFSTLTVSNTNPEDSSIYLCSVE
>V131RF-AHZZ01067648.1-trbv |(3732, 4029)|2.92530342777|(0.976,0.998,0.955)|-1
LMEADIYQNPRHRVIGTGKKITLECSQTMGHDKMYWYQQDPGMELHLIHYSYGVNSTERG
DFSSESTVSRIRIEHFPLTLESTSPSHTSQYLCASSE
>V132RF-AHZZ01067649.1-trbv |(1785, 2085)|2.94821476928|(0.988,0.964,0.999)|-1
HAEAGVSQDPRHKITKTGQNVSFKCVPISEHNRLYWYRQTLGQGPEFLTYFQNEAQQDRS
GLFSDRFSAERPEGSISTLMIQHTEQGDSAVYLCASSL
>V133RF-AHZZ01067649.1-trbv |(16676, 16973)|2.98351211712|(0.998,0.999,0.987)|-1
HMDAGITQSPRHKITETGTPVTLRCHQTENHRYMYWYRQDLGNGLRLIHYSYGVEDTDKV
EISDGYSVSRSKTEDFLLTLESATRSQTSVYFCASSE
>V134RF-AHZZ01067649.1-trbv |(28030, 28318)|2.15587883353|(0.935,0.631,0.903)|-1
GVTQSPRYKITEKKQPVAFWCNPISGHNTLYWYRQNLGQGPELLIRYENEEAVDDSRFPK
DRFSAERLKGVDSTLKIQPAELGDSAVYLCASSL
>V135RF-AHZZ01067649.1-trbv |(33773, 34073)|2.20027316057|(0.797,0.680,0.778)|-1
HTDAGVIQSPRHEVTEMGKEVTLRCEPISGHSSLFWYRQSMMRGLEFLIYFNNKSPIDDS
GMPKDRFSATMPNASFSTLKIQPSEPRDSAMYFCASSL
>V136RF-AHZZ01067649.1-trbv |(37056, 37356)|2.59803493348|(0.942,0.887,0.830)|-1
HTDAGVIQSPRHEVTEMGKEVTLRCEPISGHTYLFWYRQSMMQGLEFLIYFNDKSPIDDS
GMPKDRFSATMPNASFSTLKIQPSEPRDSAVYFCASSL
>V137RF-AHZZ01067649.1-trbv |(52456, 52756)|2.16872981523|(0.780,0.951,0.632)|-1
LIDAGVTQTPRHKVTEMGQEVTMRCQPILGHNTVFWYRQTVMQGLELLVYLRNKASLDDS
GMPKDRFSAEMPDASLATLKIQPSEPRDSAVYLCASGL
>V138RF-AHZZ01067649.1-trbv |(59401, 59701)|2.62643293044|(0.955,0.968,0.798)|-1
HTEAGVTQFPSHRVIEKGQTVTLRCDPISGHDYLYWYRRVMGKEIKFLIYFMRASVQDES
GMPNKRFSAERTGGTYSTLKVQPAELEDSGVYFCASSQ
>V139RF-AHZZ01067649.1-trbv |(64509, 64806)|1.7353086748|(0.874,0.628,0.642)|-1
HGDVMVIQNPRYQVTQLEKPVTLSCSQNLNHKVMYWYQQKPSQAPKLLFHYYDKDFNNEA
DTPDNFQSRRPNTSFCFLDIRSPGLEDAAVYLCASSK
>V140RF-AHZZ01067649.1-trbv |(69483, 69783)|2.78776175207|(0.961,0.968,0.883)|-1
SPGEEVTQTPKHLVKGEGQKAKLYCDPIKGHSYVFWYQQVLRKEFKFLISFQNKNVFDET
GMPKERFSAKCPANSPCSLEIQATKLKDSAVYFCASSQ
>V141RF-AHZZ01067649.1-trbv |(89894, 90191)|2.89468723924|(0.996,1.000,0.921)|-1
TVDGGITQSPKYLFRKEGQNVTLSCEQNLNHDAMYWYRQDPGQGLRLIYYSQIVNDIQNG
DIAEGYSVSRDRKESFPLTVTSAQRNPTAFYLCASSI
>V142RF-AHZZ01067649.1-trbv |(108243, 108543)|2.5871407019|(0.957,0.781,0.966)|-1
SADTKVTQRPRLLVKANEQKAKMDCVPVKGHSYVYWYRKKLDEELKFLVYFQNEEIIQKA
EIINERFSAQCPQNSPCTLEIQSTESGDAALYFCASSK
>V143RF-AHZZ01067649.1-trbv |(117153, 117458)|2.31065810337|(0.961,0.902,0.700)|-1
SFHAEVTQTPGYLVKGKGQKTKIDCTPEKGHTYVYWYQQNQNKEFTFLISFQDEQVLQET
ELHKKRFSSQCPKNLPCSLEIPSSEPGDTALYLCASSQST
>V144RF-AHZZ01067649.1-trbv |(129327, 129625)|2.93248011776|(0.973,0.976,0.984)|-1
SMDADVTQTPRNSIAKTGKRIMLECSQTKGHDQMYWYRQDPGLGLRLIFYSFDVEDINKG
EISDGYSASRQEQAKFSLSLESATPNQTALYFCATSD
>V145RF-AHZZ01067651.1-trbv |(1632, 1932)|2.99498000014|(0.998,0.997,1.000)|-1
HTGAGVSQSPRYKVTKRGQDVALRCDPISGHDYLYWYQQALGQGPELLTYFNYEAQQDKS
GLPNDRFSADRPEGSVSTLKIQRTEQRDSAVYLCASSL
>V146RF-AHZZ01067651.1-trbv |(6692, 6982)|2.61461841225|(0.979,0.930,0.816)|-1
DAGVTQSPTHLIKMRGQQVTLRCSPISGHTSVSWYQQALGQGPQLIFEYDRKEERVRGNF
LDRFSGRQFPNYSSELNVNASEMGDSALYLCASSL
>V147RF-AHZZ01067651.1-trbv |(13303, 13600)|2.97974002125|(0.997,0.990,0.993)|-1
PGNAGVTQTPKFQILKTGQSMTLQCAQDMNHNYMSWYRQDPGVGLRLIHYSVGAGVTDKG
EVSNGYNVSRLNTEDFPLSLESAASSQTSVYFCASSY
>V148RF-AHZZ01067651.1-trbv |(19186, 19486)|2.190492477|(0.902,0.613,0.990)|-1
HTGAGVSQFPRYRVTKRGQDVTLRCDPISGHEYLSWYQQAPGQGPEFLTYFQNDAQLDKS
GLPSDRFSAARPEGSVSTLKIQRTEQGDSAVYLCASSL
>V149RF-AHZZ01067651.1-trbv |(27974, 28285)|2.39757158798|(0.833,0.767,0.816)|-1
PVEPGVTQSPTHLIKTRGQQVILRCSPISGHSSVYWYQQALGQGPQFIFEYCQKEERGRG
NFPDRFSGRQFPNYSSELNVSALLLGDSALYLCASSLAQPAE
>V150RF-AHZZ01067651.1-trbv |(47891, 48187)|2.99596000066|(1.000,0.999,0.997)|-1
PVDAGVTQSPTHLIKTRGQQVTLRCSPISGHTSVYWYQQALGQGPQFIFQYYEKEERERG
NFPDRFSGRQFPNYSSELNVSALLLGDSALYLCASSL
>V151RF-AHZZ01067651.1-trbv |(55192, 55483)|2.9252426846|(0.990,0.984,0.956)|-1
NADVTQTPKFRVLKTGQSMIVQCAQDMKHDYMFWYRQDPGMGLRLIYYSVTAGITTKGEV
PNGYNVSRINTEDFLLRLESAALSQTSVYFCASSY
>V152RF-AHZZ01067651.1-trbv |(59487, 59787)|2.9958720041|(0.996,1.000,1.000)|-1
HTGAGVSQSPRYKVIKKGQDVALRCDPISGHAALYWYQQALGQGPEFLTYFNYQAQPDKS
GLPNDRFSAERSEGSVSTLTIQRTEQQDSAVYLCASSL
>V153RF-AHZZ01067651.1-trbv |(68255, 68551)|2.12584889419|(0.929,0.876,0.631)|-1
PVIAGVAQSPTHLIKTRGQQVTLRCSPISGHNTVYWYQQALGQGPQLIFQYYRGEDRGRG
NFPERFSGHQFPNYSSELNVSALLLGDSALYLCASSL
>V154RF-AHZZ01067652.1-trbv |(695, 992)|3.0|(1.000,1.000,1.000)|-1
PVNAGVTQTPKFQVLKTGQSMTLQCAQDMNHDCMYWYRQDPGMGLRLIHYSVGEGSTDKG
EVPDGYNVTRSNTEDFPLRLESAAPSQTSVYFCASSY
>V155RF-AHZZ01067652.1-trbv |(5225, 5525)|2.98328822908|(1.000,0.987,0.997)|-1
HTGAGVSQSPRYKVTKRGQDVALRCDPISGHDYLYWYQQAPGQGPEFLTYFQNDAQRDKS
GLPNDRFSAERTEGSVSTLKIQRTEQADSAVYLCASSL
>V156RF-AHZZ01067652.1-trbv |(13142, 13432)|2.121850294|(0.918,0.834,0.649)|-1
DAGVTQSPTHLIKTRGQQVTLRCSPISGHTSVSWYQQALGQGLQFILWYDEEEERGRGTF
PHRFSGHQFPNYSSELNVNASEVGDSALYLCASSL
>V157RF-AHZZ01067652.1-trbv |(18432, 18743)|2.44222772437|(0.898,0.942,0.724)|-1
NAGVTQTPKFQVLKTGQSMTLQCAQDMSHNWYRQHPGMGLRLIRYSAAADVTDKGEVPSG
YNVSRLNTEDFPLRLESAASSQTSVYFCASSYSPTLQGHLLS
>V158RF-AHZZ01067652.1-trbv |(24517, 24817)|2.98274003277|(0.992,1.000,0.991)|-1
HTGAGVSQSPRYKVTKRGQDVALRCDPISGHVALYWYQQALGQGPEFLTYFQNDAQPDKS
GLPSDRFSAERPEGSVSTLKIQRTQQGDAAVYLCASSL
>V159RF-AHZZ01067652.1-trbv |(35002, 35298)|2.53926726102|(0.971,0.790,0.914)|-1
SVDGGVTQSPRHLIKTTGQQVTLRCSPISGHTSVSWYQQALGQGPQFIFEYYEEKERERG
NFPDRFSGHQFPNYSSELNVNALEAGDSALYLCASSL
>V160RF-AHZZ01067652.1-trbv |(38310, 38607)|2.92130107483|(0.978,0.986,0.959)|-1
LVNAGVTQTPKFQVLKTGQSMTVQCAQDMNYNFMYWYRQDPGVGLRLIHYSGAAGTTDKG
EVPSGYNVSRLNTEIFPLRLESAAPSQTSVYICASSY
>V161RF-AHZZ01067652.1-trbv |(42887, 43187)|2.87695851388|(0.978,0.990,0.922)|-1
HTGARVSQSPRYKVTKRGQDVALRCDPISGHDYLYWYQQALGQGPELLTYFSYEAQQDKS
GLPSDRFSAERPEGSVSTLKIQRTQQWDSAMYLCASSL
>V162RF-AHZZ01067652.1-trbv |(53188, 53484)|1.95680283531|(0.986,0.823,0.636)|-1
SVDAGVTQSPTHLIRKRGQQVTLRCSPISGHNTVSWYQQALGQGPQFIFQYYEKEERGRG
NFPDRFSGHQFPNYSSELNVNASEMGDSALYLCASSL
>V163RF-AHZZ01067653.1-trbv |(5340, 5640)|2.93613070699|(0.989,0.997,0.955)|-1
HTGAGVSQSPSNKVTEKGKDVVLRCDPISGHAVLYWYRQNLGQGLEFLIYFQGKGAVDDS
GLCSDRFSATRPEGSASTLKIQHTEQGDSAMYFCASSL
>V164RF-AHZZ01067653.1-trbv |(10391, 10703)|2.474765937|(0.877,0.830,0.800)|-1
SVDTGVTQSPTHLIKTRGQQVTLRCSPISGHNTVSWYQQTPGQGPQFIFEYANELRTSEG
NFPHRFSGRQFRDYHSEMNVSALELGDSALYLCASSLAQPGR
>V165RF-AHZZ01067653.1-trbv |(13070, 13360)|2.90114737884|(0.978,0.947,0.980)|-1
DCGVTQTPKHLITAIGQQVTLRCSPRSGDLSVYWYQQSLGQGLQFLIQYYNGEERAKGNI
LERFSAQQFPDLHSELNLSSLELGDSALYFCASSL
>V166RF-AHZZ01067653.1-trbv |(30668, 30959)|2.19721318732|(0.929,0.818,0.695)|-1
AGVAQSPRYKITEKSQAVAFWCDPISGHATLYWYRQILGQGPELLVRFQNKGVVDDSQLP
KDRFSAERLKGVDSTLRIQPAELGDSAVYLCASSL
>V167RF-AHZZ01067653.1-trbv |(43250, 43547)|2.11424155363|(0.909,0.587,0.975)|-1
HRDAEITQSPRHKVTETGRQVTLTCHQTWNHNNMFWYRQDLGHGLRLIYYSAGASIIDKG
EVPDGYVVSRSKTEDFPLTLESATRSQTSVYFCASSE
>V168RF-AHZZ01067653.1-trbv |(52371, 52659)|2.4348941301|(0.907,0.916,0.730)|-1
GVAQSPRYKVIEKSQAVTFWCNPVSGHATLYWYRQILGQGPELLVQFRNNDVVDDSQLPK
DRFSAERLKGVNSTLKIQPAELGDSAVYLCASSL
>V169RF-AHZZ01067655.1-trbv |(10936, 11249)|2.90763393453|(0.989,0.991,0.938)|-1
SLDTAVSQTPKYLVTQTGKNESLKCEQNLGHNAMYWYKQDSKKLLKIMFIYNNKEPILNE
TVPNRFSPKSPDKAHLNLHIKSVELGDSAVYFCASSQDTALQ
>V170RF-AHZZ01067655.1-trbv |(14360, 14657)|2.35909771637|(0.852,0.961,0.691)|-1
PMDTGVTQTPRHLVMGMTNKKSLKCEQHLGHNAMYWYKQKAKKPPELMFIYNFKEPAENN
SVPSRFVPECPDSSLFYLHLRALQPEDSALYLCASSQ
>V171RF-AHZZ01067655.1-trbv |(26234, 26531)|2.97909640489|(0.998,0.999,0.983)|-1
LVNAGVTQTPKFQVLKTGQNMTLKCAQDMNHDRMYWYRQDPGMGLRLIHYSAGEGSTEKG
EVSNGYNASRLNKKDFLLRLESAAPSQTSMYFCASSE
>V172RF-AHZZ01067655.1-trbv |(28925, 29222)|2.97567605248|(0.995,0.995,0.986)|-1
PVNAGVTQTPKFQILKTGQNMTLKCAQDMNHNYMYWYRQDPGMGLRLIHYSAGEGSTEKG
EVPDGYNASRLNPQNFLLRLESAAPSQTSMYFCASSE
>V173RF-AHZZ01067655.1-trbv |(32665, 32965)|2.98696000066|(0.995,0.994,0.998)|-1
HTGAGVSQSPRNKVTEEGKDVVLRCDPISGHTALYWYRQSLGKGLEFLIYFQGNDAPDKS
GLPSGRFSAERTEGSVSTLKIQRTEQGDSAVYLCASSL
>V174RF-AHZZ01067656.1-trbv |(7797, 8088)|1.94483036212|(0.891,0.913,0.537)|-1
PEVTQTPSHQVTQMGQEVILRCVPISNHFYFYWYRQILGQKVEFLVSFVNDEISDKSEMF
DDRFSVGRSDGSNFTLKIKSTKLEDSAMYFCASSE
>V175RF-AHZZ01067656.1-trbv |(14292, 14589)|2.9660682612|(0.996,0.988,0.983)|-1
PLDTAVFQTPKYLVTQTGKKESLKCEQNLGHDTMYWYKQDSKKLLKIMFIYSNKEPILNE
TVPNRFSPDSPDKAHLNLHIKSVELGDSAVYFCASSQ
>V176RF-AHZZ01067656.1-trbv |(18626, 18923)|2.93548007169|(0.978,0.971,0.987)|-1
PTDTGVTQTPKHLVMGMTNKKSLKCEQHLGHNAMYWYKQKAKKPPELMFIYNYEKLSINE
SVPSRFSPECSKSSLLYLHLRALQPEDSALYLCASSQ
>V177RF-AHZZ01067656.1-trbv |(37172, 37469)|2.99599600001|(0.999,0.999,0.998)|-1
PANADVTQSPKFQILKTGQSMTLQCAQDMNHNSMYWYRQDPGMGLRLIHYSATKDTTDPG
EVPDGYSVSRLNKKEFLLKLESAAPSQTSVYFCASSE
>V178RF-AHZZ01067659.1-trbv |(1943, 2234)|2.16952935914|(0.945,0.931,0.627)|-1
PEVTQTPSHQVTQMGQEVILRCVPISNHLYFYWYRQILGQKVEFLVSFYNGKISEQSEIF
DDRFSVGRSDGVHFTLKIKSTKLEDSAMYFCASSE
>V179RF-AHZZ01069458.1-ighv |(21609, 21918)|2.93050296661|(0.990,0.993,0.953)|-1
VQCEVQLVESGGGLVQPGASLRLSCEASGFTFGDYAMSWVHQAPGKGLEWVSSISYTGKN
IYYADSVKGRFTISRDNAKNSLSLQMNSLKTEDTAVYYCTR
>V180RF-AHZZ01069458.1-ighv |(26822, 27131)|3.0|(1.000,1.000,1.000)|-1
VQCEVQLVESGGGLVQPGGSLRLSCAASGFTFSSYDMSWVRQAPGKGLEWVSYISNGGGS
TYYADSVKGRFTISRDNSKNTLSLQMNSLRAEDTAVYYCAK
>V181RF-AHZZ01069461.1-ighv |(27499, 27811)|2.98489600501|(0.993,0.998,0.994)|-1
VLSQVQLQESGPGLVKPPETLSLTCAVSGGSISDSYYWSWIRQPPGKGLEWIGYIYGGSG
STSYNPSLKSRVTLSVDTSKNQFSLKLSSVTAADTAVYYCAR
>V182RF-AHZZ01084887.1-ighv |(16319, 16625)|2.55897426403|(0.978,0.982,0.765)|-1
CAEVQLVQSGAEVKRPGESLRISCKTSGYSFTSYWISWVRQMPGKGLEWMGMIDPSDSDT
RYSPSFQGQVTISADKSISTAYLQWSSLKASDTATYYCAR
>V183RF-AHZZ01084890.1-ighv |(9388, 9701)|2.98551611711|(0.999,0.999,0.988)|-1
VQCEVQLVESGGGLVQPGGSLRLSCAASGFTFSNSWMNWVRQAPGKGLEWVARIKSKADG
ETADYAASVKGRFTISRDDSKNTLYLQMNSLKTEDTAVYYCT
>V184RF-AHZZ01084890.1-ighv |(28760, 29069)|2.44477529487|(0.999,0.719,0.996)|-1
VQGEVQLVESGGGLAKPGGSLRLSCAASGFTFSNYWMYWVRQAPGKGLEWVSAINTGGGS
TYYADSVKGRFTISRENAKNTLYLQMNSLRAEDTAVYYCAK
>V185RF-AHZZ01084892.1-ighv |(6822, 7131)|2.19829750086|(0.985,0.982,0.629)|-1
VQCEVKLVESGGGLVQPGGSLRLSCAISGFTFSNYWMFWVRQAPGKGLEWVSSISGSSSS
TYYPDSVKGRFTISRDNAKNTLYLQMNSPRAEDTAVYYCAR
>V186RF-AHZZ01084892.1-ighv |(16134, 16440)|2.75936418164|(0.890,0.922,0.993)|-1
VQCEVQLVAYGGGLQQPGGSLRLSCGFTFSDHYMSWIRQAPGKGPEWVGFMRNKANGGTT
EYATSVKGRFTISRADSKSMASLQMSSLNTEDTAVYYCAR
>V187RF-AHZZ01084892.1-ighv |(32791, 33100)|2.95838667423|(0.999,0.999,0.965)|-1
VQCEVQLVESGGGLVQPGGSLRLSCAASGFTFSDYWMDWVRQAPGKGLEWVSSVSGSSSN
TYYPDSVKGRFTISRENAKNTLYLQMNSLRAEDTAVYYCAR
>V188RF-AHZZ01084893.1-ighv |(12328, 12643)|3.0|(1.000,1.000,1.000)|-1
VQCEVQLVESGGGLVQPGRSLRLSCAASGFTFSNYYMDWVRQAPGKGLEWVGRIRNKANS
YTTEYAASVKGRFTISRDDSKNTLYLQMSSLKTEDTAVYYCAR
>V189RF-AHZZ01084896.1-ighv |(1010, 1319)|2.44161652935|(0.981,0.967,0.725)|-1
VCAEVQLVQSGAEVKRPGESLRISCKTSGYSFTGSWISWVRQMPGKGLEWMGSIYPGDSD
TRYNPSFQGQVTISADKSISTAYLQWSSLKASDTATYYCAK
>V190RF-AHZZ01089506.1-iglv |(19553, 19862)|2.2264188737|(0.975,0.631,1.000)|-1
SWAQSVLTQPPSASEAPGQRVTISCSGSSSNIGSNYVNWYQQLEGKAPKLLIYNNNQRPS
GVPDRFSGSKSGTSASLTISGLQSEDEADYYCAAWDNSLNG
>V191RF-AHZZ01089506.1-iglv |(37855, 38165)|2.9649882524|(1.000,0.973,0.995)|-1
SLSQPVLTQPASLSASPGASARLTCTLSSGINVGSYRIYWYQQKPGSPPRYLLNYYSDSD
KDQGSGVPSRFSGSKDASANAGLLLISGLQSEDEADYYCAI
>V192RF-AHZZ01089506.1-iglv |(48570, 48877)|2.94726365316|(0.991,0.965,0.994)|-1
SWAQSVLTQPPSVSAAPGQKVTISCSGSSSNIGSKYVSWYQQLPGTAPKLLIYDNNKRPS
GISDRFSGSKSGTSATLAITGLQTGDEADYYCAAWDNSLS
>V193RF-AHZZ01089506.1-iglv |(53590, 53897)|2.99493200206|(1.000,0.999,0.996)|-1
SWAQSVLTQPPSVSGDPGQRVTISCTGSSSNIGGYYVYWYQQLPGTAPKLLIYDNNKRPS
GVSDRFSGSKSGTSASLTITGLQPGDEADYYCGAWDSSLS
>V194RF-AHZZ01089506.1-iglv |(59408, 59715)|2.9663881665|(0.992,0.995,0.980)|-1
SRAQSVLTQPPSVSGAPGQKVTISCTGSSSNIGGYNVYWYQQLPGTAPKLLIYDNNKRPS
GISDRFSGSKSGTSASLAITGLLPEDEADYYCQSYDSSLS
>V195RF-AHZZ01089506.1-iglv |(83472, 83782)|2.40384652089|(0.995,0.952,0.722)|-1
SLSQPVLTQPASLSASPGASASLTCTFSGGINVAGYYIYWYQQKPGSPPRYLLRYKSDSD
KGQGSGVPSRFSGSKDASANTGILRISGLQSEDEADYYCAI
>V196RF-AHZZ01089506.1-iglv |(88028, 88337)|2.97864403777|(0.994,0.986,0.999)|-1
SWAQSVLTQPRSASEAARKSVTISCSGSSSNIGSNSVSWYQQLPGTAPKLLIYYNDQRAS
GVSDRFSGSKSGTSASLAISGLQTEDEADYYCTAWDDSLSG
>V197RF-AHZZ01089507.1-iglv |(5814, 6121)|1.97675110564|(0.767,0.750,0.585)|-1
SNSQAVVTQEPSMTVSPGGTVTLTCASSTGAVTSGNYPNWFQQKPGQAPRTLIYNTNSKY
SWTPARFSGSLAGGKAALTLSGAQPEDEAEYYCLLYYSGA
>V198RF-AHZZ01089507.1-iglv |(10483, 10793)|2.15953046957|(0.984,0.952,0.627)|-1
SLSQPVLTQPASLSASPGASASLTCTFSGGINVAGYYIYWYQQKPGSPPRYLLWYKSDSD
KGQGSGVPSRFSGSKDASANTGILRISRLQSEDEADYYCAI
>V199RF-AHZZ01089507.1-iglv |(15336, 15645)|2.56401842507|(0.993,0.969,0.776)|-1
SWAQSVLTQPPSASGAPGQSVTISCSGSSSNIRGNGVHWYQQLSGTAPKLLIYNNNQRPS
GVPDRFSGSKSGTSASLAITGLRPEDEADYYCEAWDDSLSG
>V200RF-AHZZ01089508.1-iglv |(11286, 11596)|2.7371420013|(0.991,0.862,0.954)|-1
SLSQPVLTQPTSLSASPGASARLTCTLRSGISVGSYRIFWYQQKPGSPPRYLLWYKSDSD
KHQGSGVPSRFSGSKDASANAGILLISGLQSEDEADYYCTT
>V201RF-AHZZ01089508.1-iglv |(16094, 16403)|2.98859608|(1.000,0.990,0.999)|-1
SWAQSVLTQPPSASGAPGQRVTISCSGSSSNIGSNNVYWYQQFPGTAPKLLIYYSNQRPS
GVPDRFSGSKSGTSASLAITGLRSEDEADYYCAAWDDSLSS
>V202RF-AHZZ01090491.1-ighv |(1149, 1458)|2.96764165191|(1.000,1.000,0.971)|-1
VQCEVQLVESGGGLVKPGASLRLSCAASGFTFSSYGMHWVRQAPGKGLEWVSSISSDSSY
IYYADSVKGRFTISRDNAKNSLSLQMNSLRAEDTAVYYCAR
>V203RF-AHZZ01090492.1-ighv |(8844, 9153)|2.74694421609|(0.994,0.946,0.873)|-1
AHSQVQLVQSGAEVKKPGSSVKVSCKASGYTFTDYYMHWVRQAPGQGLEWMGEINPKTGG
TNYAQKFQGRVTMTRDTSTSTAYMELSSLRSEDTAVYYCAT
>V204RF-AHZZ01090492.1-ighv |(11745, 12060)|2.8122896514|(0.902,0.963,0.999)|-1
VQCEVQLVESGGGLVQPGGSLRLSCAASGFTFSNHCMSWVRQAPGKGPEWVGLIRNKANG
GRAEYAASVKGRFTISRDDSKSIASLQMNSLKTGDTAVYYCTR
>V205RF-AHZZ01090494.1-ighv |(1969, 2281)|2.97151611711|(0.987,0.987,0.998)|-1
VLSQVKLQESGPGLVKPSETLSLTCTVSSGSISDSYYWSWIRQAPGKGLEWIGRIYSSGS
STNYNPSLKNRVTISTDTSKNQFSLKLSSVTAADTAVYYCAR
>V206RF-AHZZ01090495.1-ighv |(1255, 1564)|2.72658828795|(0.959,0.993,0.837)|-1
AQSQVQLVQSGAEVKKPGASVKLSCKASGFTFISYAISWVRQAPGQGLEWMGEIIPAFGI
ADYAQKFQGRVTITADTSTSTAYMELSSRRSEDTAVYYCAR
>V207RF-AHZZ01093946.1-trav |(12355, 12645)|2.89173090506|(0.963,0.946,0.986)|-1
VSSEDKVMQNPLSLVVHEGDTVTLNCSYEVVNFQSLLWYKQEKKAPTFLFTLTSSGIEKK
SGRLSSILDKKDFFSILNITATQTRDSAVYLCAVE
>V208RF-AHZZ01093949.1-trav |(3892, 4191)|2.8006249066|(0.967,0.972,0.887)|-1
VNGQQIMQIPQYQHVQEGEDFTTYCNSSTTLNNIQWYKQRPGGHPVFLIMLVKSGEVKKQ
KRLTFQFGEAKKNSSLHITATQTTDVGSYFCAGHSAPQ
>V209RF-AHZZ01093949.1-trav |(14852, 15142)|2.0941933241|(0.888,0.598,0.894)|-1
TIIDAKTTQPTSMDCAEGRAANLPCNHSTIGGNEYIHWYRQIHSQGPQYVIHGLKNNETN
AMASLIITEDRKSSTLILPHATLRDTAVYYCIVRV
>V210RF-AHZZ01093949.1-trav |(55719, 56043)|2.1811501107|(0.686,0.858,0.796)|-1
VNSQQKNDDQQVKQNPPSLSVQEGGISILNCDYTNSMFDYFLWYKKYPAEGPTFLISISS
VKDKNEEGRFTVFLNKSAKHLSLHIRASQPGDSAVYLCAARAQCSP
>V211RF-AHZZ01093949.1-trav |(61192, 61479)|2.32500283664|(0.792,0.732,0.818)|-1
VRSQKPVQSPQVVILQEGEDAIINCNSSKALYSVHWYRQKHGEAPVFLMILLKGGEQKSH
DKIVATFNEKKQQSSLYLMASQLSYSRTYFCGAE
>V212RF-AHZZ01093949.1-trav |(89299, 89586)|2.06910373423|(0.659,0.758,0.904)|-1
VSSQELEQSPQSLIVQEGKNLTINCTSSKTLYGLHWYKQKYGEGLIFLIMLQQGGEEKSH
EKITAKLDEKKQQSFLHITASQPSHAGIYLCGGD
>V213RF-AHZZ01093953.1-trav |(7506, 7806)|2.49465963668|(0.877,0.811,0.832)|-1
SSVAQKVTQAQSSVSMPVGKAVTLNCQYETSSWSYDLFWYKQPPSKEMIFLIRQGYSEQN
ARNGRYSVNFQKAASSIALTISALQLEDSATYFCALRE
>V214RF-AHZZ01096568.1-ighv |(3158, 3467)|2.99596800026|(1.000,0.998,0.998)|-1
VLSQVQLQESGPGLVKPSETLSLTCAVSGGSISSSYWNWIRQAPGKGLEWIGRIYSSGSS
TNYNPSLKNRVTISTDTSKNQFSLKLSSVTAADTAVYYCAR
>V215RF-AHZZ01096568.1-ighv |(16270, 16579)|2.9725031224|(1.000,0.975,1.000)|-1
VQGEVQLVESGGGLAKPGGSLRLSCAASGFTFSSYGMSWVRQAPGKGLEWVSAISSGGGS
TYYADSVKGRFTISRDNSKNTLSLQMNSLRAEDTAVYYCAK
>V216RF-AHZZ01096572.1-ighv |(422, 737)|2.93374839429|(0.970,0.983,0.982)|-1
VQCEVQLVESGRGLVQPGGSLRLSCAVSGFTFSDHYMSWVRQAPGKGPEWVGFMRNKANG
GRTEYAASVKGRFTISRDDSKSTPSLQMSSLNTEDTAVYYCAR
>V217RF-AHZZ01096574.1-ighv |(7206, 7516)|2.99280401921|(1.000,1.000,0.993)|-1
VQCEVQLVESGGGLAQPGGSLRLSCVASGFTFSDHYMDWVRQAPGKGLEWVSSISTGSGS
TTLYPDSVKGRFTISRDNAKNTVYLQMNSLRAEDTAVYYCA
>V218RF-AHZZ01096575.1-ighv |(832, 1141)|2.85902635786|(0.968,0.984,0.918)|-1
AHSEVQLVQSGAEVRKPGATVKISCKASGYTFTDYYLSWVRQAPGKGLEWMGCVDPEDGE
AIYAQKFQGRVTITADTSTDTAYMELSSLRSEDTAVYYCAR
>V219RF-AHZZ01097564.1-trbv |(19525, 19819)|1.80505741288|(0.724,0.734,0.512)|-1
VRSQTIHQWPATLVQPVGSPLSLECTVEGTSNPNLYWYRQAAGRGLQLLFYSIGVDQISS
EVPQNLSASRPQDRRFILSSKKLLLSDSGFYLCAWS
>V220RF-AHZZ01103093.1-ighv |(4113, 4425)|2.77321519324|(0.933,0.878,0.985)|-1
VLSQVQLQESGPGLLKPSETLSLTCAISGGSISSSYHYWSWIRQAPGKGLEWIGYISYSG
STNYNPSLKSRVTISTDTSKNQFSLKLSSVTAADTAVYYCAR
>V221RF-AHZZ01103093.1-ighv |(19002, 19311)|2.34190281769|(0.987,0.989,0.680)|-1
VLSQVQLQESGPGLVKPSETLSLTCAVSGYSISSGYYWGWIRQPPGKGLEWIGSIYSSGS
NYLNPSLKSRVTLSVDTSKNQFSLKLSSVTAADTAVYYCAR
>V222RF-AHZZ01103094.1-ighv |(666, 977)|2.97488623715|(1.000,1.000,0.977)|-1
VQCEVQLVESGGGVVQPGGSLRLSCAASGFTFDDYAMGWVRQAPGKGLEWVSAISWSGGS
TGYADSVKGRFTISRDNAKNSLYLQMNRLRAEDTALYYCAKD
>V223RF-AHZZ01103097.1-ighv |(667, 978)|2.99193600205|(0.996,1.000,0.996)|-1
VQCDVQLVESGGGLVKPGGSLRLSCVASGFTFSSYEMHWVRQAPGKGLEWVSGISTSGGT
TYYADSVKGRFTISRDNAKNSLFLQMNSLRAEDTAVYYCAKE
>V224RF-AHZZ01103097.1-ighv |(4629, 4936)|2.28827744436|(0.983,0.940,0.680)|-1
VLSQVQLQESGPGVVKPSETLSLTCAVSGYSISSGYYWGWIRQPPGKGLEWIGSIYSSGS
NYLNPSLKSRVTLSVDTSKNQFSLKLSSVTAADTAVYYCA
>V225RF-AHZZ01103258.1-ighv |(1265, 1574)|2.9726404731|(1.000,0.986,0.988)|-1
VLSQVQLQESGPGLVKPSETLSLTCAVSGGSISSNYWNWIRQAPGKGLEWIGSIYSSGSS
TNYNPSLKNRVTISTDTSKNQFSLKLSSVTAADTAVYYCAR
>V226RF-AHZZ01104243.1-igkv |(7682, 7981)|2.95819965751|(0.994,0.968,0.999)|-1
TTGEIVLTQSPATLSLSPGERATLSCRASQSVSSSLAWYQQKSGQAPRLLIYGASSRATG
IPDRFSGSGSGTDFTLTISILEPEDVAVYYCQQYYNWN
>V227RF-AHZZ01105198.1-iglv |(1704, 2007)|2.99596000066|(1.000,0.997,0.999)|-1
SWAQSALTQPRSVSGSPGQSVTISCTGTSSDIGGYNYVSWYQQHPGKAPKLMIYDVSKRP
SGVSDRFSGSKSGNTASLTISGLQAEDEADYYCSSYAGS
>V228RF-AHZZ01105198.1-iglv |(11233, 11520)|2.1864140977|(0.882,0.826,0.664)|-1
DTATLSVSVSPGQTARITCSGDVLKENYADWYQQKPGQAPVLVIYEDSKRPSGIPERFSG
STSGDTTTLTISSTLSEDEADYYCFSGNENNPIV
>V229RF-AHZZ01105199.1-iglv |(5057, 5367)|2.96269465218|(0.996,0.972,0.997)|-1
SWAQAALTQPPSVSKSLGQSVTISCTGTSNDIGGYNAVSWYQQHPGTAPRLLIYEVSNRP
SGVSDRFSGSKSGNTASLTISGLQAEDEADYYCGSYRSGST
>V230RF-AHZZ01105199.1-iglv |(17460, 17763)|2.98548011776|(1.000,0.989,0.997)|-1
SAASYELTQPHSVSVSPGQTARITCGGDNIGSKYVQWYQQKPAQAPVLVIYADSERPSGI
PERFSGSKSGNTATLTISGVEAGDEADYYCQVWDSSSDH
>V231RF-AHZZ01105200.1-iglv |(22027, 22330)|2.78877966077|(0.993,0.882,0.965)|-1
SAASYELTQPGSVSVSPRQTARITCGGDNIGSKSVHWYQQKPGQAPVLVIYNDSERPSGI
PERFSGSNSGNTATLTISGVEAGDEADYYCQVWDSSSKY
>V232RF-AHZZ01105200.1-igkv |(26500, 26797)|2.03796295887|(0.762,0.682,0.660)|-1
SVVSSELTQSCMSVPGTYSQDDCQGDSLKTYYASWYQQKQARSLCWSSMVTTTGPQGSPG
RFSVSWSGNTGSLTITAAQVEDEADYYCNSWDSSGNH
>V233RF-AHZZ01105201.1-iglv |(54273, 54578)|2.96380001|(0.988,0.993,0.983)|-1
SVASYELTQPPSVSVSPGQTARITCSGDALPKNYAYWYQQKPGQAPVLVIYKDSERPSGI
PERFSSSSSGTTVTLTISGAQAEDEADYYCYSGDGNSLTV
>V234RF-AHZZ01105201.1-iglv |(63444, 63754)|2.9969280013|(0.997,1.000,1.000)|-1
SWAQSALTQPPSVSGSPGQSVTISCTGTSSDVGGYNYVSWYQQHPGTAPKLMIYDVSNRP
SGVSDRFSGSKSGNTASLTISGLQAEDEADYYCCSYTTSST
>V235RF-AHZZ01105201.1-iglv |(75648, 75951)|2.75184346526|(0.988,0.943,0.877)|-1
SAASYELTQPPSVSVSPGQTARITCGGDNIGSEAVHWYQQKPPQAPVLVIYADSERPSGI
PERFSGSNSGNTATLTISGVEAGDEADYYCQVWDISNDH
>V236RF-AHZZ01106331.1-igkv |(10056, 10356)|3.0|(1.000,1.000,1.000)|-1
ARCDIQLTQSPSSLSASVGDRVTITCRASQGISSYLAWYQQKPGKAPKLLIYDASNLQSG
VPSRFSGSGSGTEFTLTISSLQPEDFAVYYCQQRNSYP
>V237RF-AHZZ01106331.1-igkv |(16128, 16428)|2.99899600001|(1.000,0.999,1.000)|-1
AKCDIQMTQSPSSLSASVGDRVTITCRASQGISSYLAWYQQKPGKAPKPLIYYASNLESG
VPSRFSGSGSGTEFTLTISSLQPEDFATYYCQQYNSAP
>V238RF-AHZZ01106331.1-igkv |(33100, 33400)|2.96164165191|(0.998,0.998,0.969)|-1
ARCDIQMTQSPSSLSASAGDRVTITCRASQGISTYLNWYQQKPGKAPTRLIYAASSLQSG
VPSRFSGSGSGTEFTLTISSLQPEDFATYYCLQYNSAP
>V239RF-AHZZ01106331.1-igkv |(43583, 43883)|2.98267205249|(0.997,0.988,0.998)|-1
TTGETVMTQSPATLSLSPGERATLSCRASQSVGSSLAWYQQKPGQAPRLLVYYASSRATG
IPDRFSGSGSGTDFTLTISSLEPEDVGVYYCQKYNDWP
>V240RF-AHZZ01107345.1-trbv |(266, 563)|2.6294945556|(0.891,0.834,0.921)|-1
PIDSGITQTPKHLVIGMTNKKSLKCEQHMGHRAVYWYKQKAKKPPEIMFMYNYETLSINE
SVPSRFSPECSKSSLLHLHLQALQPEDSALYLCASSQ
>V241RF-AHZZ01107346.1-trbv |(98987, 99285)|2.52645445561|(0.944,0.861,0.814)|-1
TQTPSHQVTQMGQEVILRCVPIPNHLNFYWYRQILGQKVEFLVYFYNDNISEKSEIFDDR
FSVERPDGSNFTLKIKSTKLEDSAMYFCASSEATALQ
>V242RF-AHZZ01107346.1-trbv |(105930, 106227)|2.3810469634|(0.960,0.953,0.702)|-1
SLDTAVSQTPKYLVTQTGKKESLKCEQNLGHDAMYWYKQDSKKLLKIMFSYNNKELIINE
TVPNRISPDSPDKAHLNLHIKSVELGDSAVYFCASSQ
>V243RF-AHZZ01107346.1-trbv |(110556, 110852)|1.57270301453|(0.537,0.903,0.548)|-1
PIDSGVTQTPKHLVIGMTNKKSLKCEQHMGHRAVYWYKQKAKKPPEIMFMYNYETLSINE
SVPSRFSPECSKSSLLHLHLQALQPETQPCISAPAAQ
>V244RF-AHZZ01107395.1-igkv |(1617, 1915)|2.9055734465|(0.985,0.949,0.977)|-1
TTGEIVMTQSPATLSLSPGERATLSCRASQSVNSYLAWYQQKPGQAPRLLIYDASSRATG
IPDRFSGSGSGTDFTLTISSLEPEDVAVYFCLQSSNW
>V245RF-AHZZ01107399.1-igkv |(425, 725)|2.994900005|(1.000,0.995,1.000)|-1
AKCDIQMTQSPPSLSASVGDRVTITCQASQGISNWLAWYQQKPGEAPKLLIYAASTLQSG
VPSRFSGSGSGTEFTLTISSLQPEDFATYYCQQHNSYP
>V246RF-AHZZ01108758.1-ighv |(6447, 6754)|2.98782001102|(0.999,0.993,0.996)|-1
VLSQVQLQESGPGVVKPSETLSLTCAVYGGSVSGSYWSWIRQAPGKGLEWIGEINGNSGS
TSYNPSLKSRVTISTDTSKNQFSLKLSSVTAADTAVYYCA
>V247RF-AHZZ01110488.1-igkv |(1345, 1645)|3.0|(1.000,1.000,1.000)|-1
ARCDIQMTQSPSSLSASVGDKVTITCHASQSISSWLAWYQQKPGKAPKLLIYKASSLQSG
VPSRFSGSGSGTDFTLTISSLQPEDFATYYCQQYDSNH
>V248RF-AHZZ01111138.1-igkv |(1438, 1738)|3.0|(1.000,1.000,1.000)|-1
ARCDIQMTQSPSSLSASVGDKVTITCHASQGISSWLSWYQQKPGKAPKLLIYKASSLQSG
VPSRFSGSGSGTDFTLTISSLQPEDFATYYCQQYSSSP
>V249RF-AHZZ01111138.1-igkv |(3529, 3815)|2.72005121372|(0.887,0.907,0.938)|-1
IVMTQSPATLSLSPGERATLSCRASQSVSSRLAWYQQKPGEAPRLLIYDASSRATGIPAR
FSGSGSGTDFTLTISSLEPEDVAVYFCQQESNW
>V250RF-AHZZ01111138.1-igkv |(14203, 14503)|2.99696400065|(1.000,1.000,0.997)|-1
ARCDIQMTQSPPSLSASVGDRVTITCQASQSISNYLAWYQQKPGKAPKLLIYAASTLQSG
VPSRFSGSGSGTEFTLTISSLQPEDFATYYCQRHNSYP
>V251RF-AHZZ01111367.1-igkv |(1438, 1738)|3.0|(1.000,1.000,1.000)|-1
ARCDIQMTQSPSSLSASVGDKVTITCHASQGISSWLSWYQQKPGKAPKLLIYKASSLQSG
VPSRFSGSGSGTDFTLTISSLQPEDFATYYCQQYSSSP
>V252RF-AHZZ01111367.1-igkv |(3529, 3815)|2.72005121372|(0.887,0.907,0.938)|-1
IVMTQSPATLSLSPGERATLSCRASQSVSSRLAWYQQKPGEAPRLLIYDASSRATGIPAR
FSGSGSGTDFTLTISSLEPEDVAVYFCQQESNW
>V253RF-AHZZ01111367.1-igkv |(14330, 14630)|2.99385601037|(1.000,1.000,0.994)|-1
ARCDIQMTQSPPSLSASVGDRVTITCQASQGISNYLAWYQQKPGKAPKLLIYAASTLQSG
VASRFSGSGSGTEFTLTISSLQPEDFATYYCQQHNSYP
>V254RF-AHZZ01112481.1-ighv |(613, 919)|2.98896800026|(0.995,0.997,0.997)|-1
VLSQVQLQESGPGVVKPSETLSLTCAVSGGSISSSYWSWIRQPPGKGLEWIGYIYGGGST
NYNPSLKSRVTMSADTSKNQLSLKLSSVTAADTAVYYCAR
>V255RF-AHZZ01125719.1-ighv |(24239, 24554)|2.99899200002|(0.999,1.000,1.000)|-1
VQCEVQLVESGGGLVQPGGSLRVSCAASGFTFSNHYMQWVRQAPGKGLEWVGFIRNKANG
GTAEYAASVKGRFTISRDDSKSIASLQMNSLKTEDTAVYYCAR
>V256RF-AHZZ01125719.1-ighv |(41713, 42022)|2.98561205453|(0.991,0.995,1.000)|-1
VQCEVQLAESGGGLVQPGGSLRLSCAASGFTFSSYEMHWVRQAPGKGLESVSVISGDSSY
THYADSVKGRFTISRDNAKNSLSLQMNSLRAEDTAVYYCAR
>V257RF-AHZZ01125719.1-ighv |(47992, 48299)|2.54876656494|(0.975,0.966,0.767)|-1
AHAQVQLVQSGPEVKQPGASVKVSCKASGYTFTSYGMNWVRQAHGQRLEWMGWINTDSGN
PTYAQGFKERFTFSMDTSISTAYLQISSLKAEDTAVYYCA
>V258RF-AHZZ01181503.1-ighv |(302, 609)|2.54876656494|(0.975,0.966,0.767)|-1
AHAQVQLVQSGPEVKQPGASVKVSCKASGYTFTSYGMNWVRQAHGQRLEWMGWINTDSGN
PTYAQGFKERFTFSMDTSISTAYLQISSLKAEDTAVYYCA
>V259RF-AHZZ01185532.1-igkv |(806, 1093)|2.9540773318|(0.995,0.986,0.975)|-1
TVVTQSPATLSLSPGERATISCRTSQSVGSRLAWYQQKPGQAPRLLIYGASNRATGIPDR
FSGSGSGTDFTLTISSLKPEDAAVYYCQQDNDWK
>V260RF-AHZZ01189918.1-igkv |(12178, 12478)|3.0|(1.000,1.000,1.000)|-1
ARCDIQMTQSPSSRSASVGDTVTITCQASQGISDYLAWYQQKPGKAPKLLIYAASNLESG
VPSRFSGSGSGTDFTLTISSLQPEDFATYYCQQYDSDP
>V261RF-AHZZ01189922.1-igkv |(4528, 4816)|2.97767205249|(0.996,0.987,0.995)|-1
IVMTQSPATLSLSLGETATISCRTSQSVGSKLAWYQQKPGQAPRLLIYGASSRATGIPDR
FSGSGSGTDFTLTISSLEPEDFAVYYCQETSNLS
>V262RF-AHZZ01189923.1-igkv |(14019, 14319)|2.93295832138|(0.979,0.959,0.998)|-1
ARCDIQMTLSPSSLSASVGDRVTITCRASQDISSYLNWYQQKPGKAPKLLIYYATSLESG
VPSRFSGSGSGTDFTLTISSLQPEDFATYYCQQFKSYP
>V263RF-AHZZ01198550.1-iglv |(4766, 5062)|1.85489173687|(0.873,0.507,0.891)|-1
SVASYELTQPLSVSVALGQMARITCGGNNIGRKNVYWYQQKPVQAPVPVIYEDSKRPSGI
PKRFSGSNSGNTATLTIDGAQAGDEADYYCQVWDSST
>V264RF-AHZZ01198550.1-iglv |(8130, 8433)|2.99385601037|(1.000,0.994,1.000)|-1
SWAQAALTQPHSVSGSPGQSVTISCTGTSSDIGGYDRVSWYQQHPGKAPKLMIYEVSKRP
SGVSDRFSGSKSGNTASLTISGLQAEDEADYYCSSYAGS
>V265RF-AHZZ01198550.1-iglv |(32463, 32773)|2.781828921|(0.915,0.909,0.970)|-1
SWAQSALIQSPSVSGSLGQSVTISCTGTSSDIGRYNYVSWYRQQPGTTTKLMMYNVNTRP
SGVSDRFSGSKSGNTASLTISGLQAEDEADYYCSSYEASDT
>V266RF-AHZZ01198551.1-iglv |(10418, 10728)|2.99298400013|(0.997,0.999,0.997)|-1
SWAQSAPTQPPSVSGSPGQSVTISCTGTSSDIGYYNAVSWYQQHPGTAPKLMIYRVSNRP
SGVSDRFSGSKSGNTASLTISGLQAEDEADYYCSSYAGSDT
>V267RF-AHZZ01198551.1-iglv |(33935, 34238)|2.89403878347|(0.995,0.940,0.973)|-1
SAASYELTQPPSVSVSPGQMARITCSGDALPEKYADWYQQKPGQSPVLIIYEDSKWPSGI
PERFSGSSSGTVATLTISGAQVEDEADYYCYSTDSSGNH
>V268RF-AHZZ01198553.1-iglv |(13429, 13732)|2.38288918767|(0.996,0.947,0.717)|-1
SVVSSELTQDPAVSVALGQTVRITCQGDSLSSYYASWYQQKPGQAPVLVIYGNNNRPSGI
PERFSVSWSGNTGSLTITGAQVEDEADYYCGSWDSSGNH
>V269RF-AHZZ01198553.1-igkv |(31919, 32229)|2.39041110811|(0.862,0.707,0.933)|-1
SWAQAALTQPPSVSKSLGQSVTISCAGTSSGIASYSDVSWYQQHPGTAPRLLIYSVSNRP
SGVSDRFSGFKSGSTASLTISGLQAEDEAIYYCCSYRSGST
>V270RF-AHZZ01198553.1-iglv |(39757, 40060)|2.93470048487|(0.977,0.967,0.992)|-1
SEASYELIQPPSVSVSPGQTARITCSGDALPDYYAYWYQQKSGQAPMLVIYKDSERPSGI
PERFSGSSSGTTVTLTISGVQAEDEADYYCQSADSSGNH
>V271RF-AHZZ01198553.1-iglv |(56860, 57163)|2.97775601537|(0.993,0.987,0.998)|-1
SATSYELTQPPSVSAASGQTARITCGGDSIGSKNVQWYQQKPAQAPVLVIYADSKRPSGI
PERFSGSNSGNTATLTISGVEAGDEADYYCQVWDSSSKH
>V272RF-AHZZ01198553.1-iglv |(68992, 69302)|2.99099200002|(0.997,0.998,0.996)|-1
SWAQAALTQPPSVSGSPGQSVTISCTGTSSDIGGYNYVSWYQQHPGKAPKLMIYEVSKRP
SGVSDRFSGSKSGNTASLTISGLQAEDEADYYCGSYASSST
>V0RF-JABR01013263.1-trbv |(179, 479)|2.87479932468|(0.986,0.967,0.934)|1
HMGAGVSQSPRYKVTKKGQDVVLSCDPISGHEALYWYQQALGQGPKFLTYFNYEAQPDKS
GLPNDRFSAERPKGSVSTLTIQRTEQRDSAVYLCASSL
>V1RF-JABR01016432.1-igkv |(2852, 3152)|1.70911219657|(0.535,0.736,0.609)|1
HEALLSPSLSRPRTTMSVSLLLPGSWAQCVLTQPPSVSAAPGQRVTISCSGSSFNFRRYY
VSWYQQLPGAAPKLLIYDVNKRTSGVPERFSGSQSGTS
>V2RF-JABR01016432.1-iglv |(27490, 27800)|2.58993781686|(0.959,0.960,0.785)|1
SLSQPVLTQPTSLSASPGASARLTCTLSSGINVGSYRIFWYQQKPGSPPRYLLWYKSDSD
KHQGSGVPSRFSGSKDASANAGILRISGLHSEDEADYYCTI
>V3RF-JABR01016432.1-iglv |(31781, 32090)|2.98097252412|(0.999,0.983,1.000)|1
SWAQSVLTQPPSASGPPGQSVTISCSGSSSNIGSNYVYWYQQLSGKAPKLLIYDNNKRPS
GVPDRFSGSKSGTSASLAISGLQTEDEADYYCAAWDDSLSG
>V4RF-JABR01020048.1-igkv |(1483, 1801)|2.56341217321|(0.995,0.794,0.937)|1
AYGDIVMTQSPDSLAVSLGERVTINCKSSQSLLYSSNNKNYLAWYQQKPGQAPKLLIYWA
STRESGVPNRFSGSGSGTDFTLTISGLQAEDMAVYYCQQYYSTP
>V5RF-JABR01043229.1-iglv |(142541, 142835)|2.90728822908|(0.964,0.967,0.977)|1
VVTQEPLLSVSSGGTVAITCGLSSGPVSTSNYPSWYQQTPGQAPRTLIYSTNTRPSGVPD
RFSGSILGNKAALTITGAEADDESDYYCVLYMGSGI
>V6RF-JABR01052882.1-trgv |(79087, 79393)|2.25700145155|(0.873,0.726,0.777)|1
RTKSVTRPAGSSAEITCDFSGDSNLYIHWYLHQEGKAPQRLLYYEPYYFKVVLESGISPG
KYDTASTRKSWNLRLQNLIENDSGVYYCATWDRHHDSDLP
>V7RF-JABR01052882.1-trgv |(83822, 84131)|2.45337966076|(0.868,0.760,0.871)|1
RTKSVTRPAGSSAEITCDLPEFSSFYIHWYLHQEGKAPQRLLYCDSSNSRVVLESGISPG
KYDTYVSTRRNLRLRLRNLIENDSGVYYCANWDRHSDSDLL
>V8RF-JABR01052882.1-trgv |(88181, 88494)|2.93294695549|(0.999,0.991,0.952)|1
SQKSSNLEGRTKSVTRPTGSSAEITCDFSGDSNFYIHWYLHQEGKAPQRLLYYDVSNSRD
VLESGLSLGKYYTHTRTRWSWILILRNLIENDSGVYYCATWD
>V9RF-JABR01059011.1-ighv |(294, 609)|3.0|(1.000,1.000,1.000)|1
VQCEVQLVESGGGLVQPGGSLRLSCAASGFTFSNYHMSWVRQAPGKGLEWVGFIRNKASG
GTAEYAASVKGRFTISRDDSKSITYLQMNSLKTEDTAVYYCAR
>V10RF-JABR01059011.1-ighv |(15565, 15872)|2.91002032645|(0.968,0.961,0.982)|1
VQCEVQSVESGGGLVQPGGSLRLSCAASGFTFSSYWMSWVRQAPGKGPEWVSDISGSTIY
YADSVKGRFTVSRDDAKNSLSLQMDSLRAEDTAVYYCARE
>V11RF-JABR01059012.1-ighv |(2630, 2952)|1.80036896818|(0.923,0.682,0.654)|1
VFSQVTLKESGPALVKPTQTLTLTCTFSGFSLSTSGMRVSWIRQPPGKALEWLALIYWDD
DKRYSPSLKSRLTISKDTSKNQVVLTMTNMDPVDTATYYCAQGAQ
>V12RF-JABR01059012.1-ighv |(17062, 17371)|2.5473184453|(0.975,0.920,0.791)|1
AHSQVQLVQSGAEVKQPGASVKVSCKASGYTFTSYAMNWVRQAHGQRLEWIGWINTNTGN
PTYAQGFKERFAFSMDTSISTAYLQISSLKAEDTAVYYCAR
>V13RF-JABR01062345.1-ighv |(2435, 2744)|2.72686251227|(0.969,0.919,0.880)|1
AQSQEQLVQSGAEVKKPGASVKVSCKASGFTFSSDAISWVRQAPGQGLEWMGRIIPILSR
TNYAQKFQGRVTITADTSTSTAYMELSSLRSEDTAVYYCAR
>V14RF-JABR01066987.1-ighv |(11840, 12146)|2.994900005|(1.000,1.000,0.995)|1
VQCEVQLTESGGGLVQPDGSLRLSCAASGFTFSSYAMQWVHQAPGKGLEWVSAIGPGGDT
YYADAVKGRFTISRDNTKNSLYLQMNSLRAEDTAVYYCAR
>V15RF-JABR01066987.1-ighv |(19343, 19652)|2.65572662848|(0.941,0.946,0.823)|1
AHSQEQLVQSGAEVKKPGASVKVSCKASGFTFDSSAISWVRQAPGQGLEWMGVIIPVAGI
TNYAQKFQGRVTITADTSTSTAYMELSSLRSEDTAMYYCAA
>V16RF-JABR01070187.1-ighv |(4809, 5118)|2.04495562101|(0.881,0.565,0.944)|1
AHSQVQLVQSGAEVKKPGSSVKVSCKASGYTFTDYYMHWVRQAPGQGLERMGWINTGSGS
TGYAQKFQGRVTMTRDTSTSTAYMELSSLRSEDTAVYYCTT
>V17RF-JABR01070187.1-ighv |(7644, 7959)|2.82828447594|(0.941,1.000,0.906)|1
VQCEVQLVESGGGLVQPGGSLRLSCAASGFTFSDYYMQWVRQAPGKGLQWVGLIRNKANG
GTTDYSVSVKGRCTISRDDSKSITSLQMNSLKTEDTAVYYCAR
>V18RF-JABR01070187.1-ighv |(14433, 14739)|2.95885291224|(0.996,0.998,0.968)|1
VQCEMQLVESGGGLVQPGGSLRLSCAASGFTFSSYDMHWVRQAPGKGLEWVSAISIGGGT
YYPDSVKGRFTISRDNAKNSLYLQMNSLRAEDMAVYYCAR
>V19RF-JABR01071886.1-ighv |(1825, 2139)|2.37903801326|(0.844,0.714,0.898)|1
VWSQVTLKESGPALVKPSQTLTLTCTFSGFSISTSGTGVGWIRQPSGKALEWLASIYWND
SKYYSTSLKSRLTISKDTSKNQVVLTMTNMDPVDTATYYCAHI
>V20RF-JABR01074704.1-ighv |(2136, 2448)|2.99385601037|(1.000,1.000,0.994)|1
VLSQVQLQESGPGLVKPSETLSLTCAVSGGSISSYNYWSWIRQPPGKGLEWIGHIYGNSA
STNYNPSLKSRVTISKDTSKNQFSLKLSSVTAADTAVYYCAR
>V21RF-JABR01074958.1-ighv |(126, 441)|2.44862680928|(0.947,0.716,0.983)|1
VQCEVQLVESGGGLVQPGGPLRLSCAASGFTFSDYYMPWVRQAPGKGLEWVGHIKNKANS
YTTEYAASVKGRFTISRDDSKNTLYLQMNSLKTEDTAVYYCAT
>V22RF-JABR01076259.1-igkv |(8845, 9160)|2.93013070699|(0.987,0.953,0.995)|1
SSGDIVMTQTPLSLPITVGETASISCRSSQSLLSSNGYNYLSWYLQKPGQSLQLLIYYGS
NRASGVPDRFSGSGSGTDFTLKISRVEAEDIGVYYCMQTLQTP
>V23RF-JABR01076260.1-igkv |(856, 1158)|2.47228119253|(0.932,0.873,0.775)|1
STGDVVMTQSPLSLPVTPGEPASISCRSSQSLLHSSGNTYLSWFQQKPGQSPRRLIYKVS
NRDSGVPDRFTGSGAGTDFTLKISRVEAEDVGVYYCMEG
>V24RF-JABR01076260.1-igkv |(17028, 17326)|2.72824613563|(0.995,0.833,1.000)|1
SKGEIVLTQSPAFRSVTPKEKVTITCRASQSIGSSLHWYQQKPDQSPKLLIKYASQSISG
VPSRFSGSGSGTDFTLTINSLEAEDAATYYCQQSSSF
>V25RF-JABR01076261.1-igkv |(12136, 12424)|2.23033769446|(0.988,0.639,0.989)|1
IVLTQSPAILSLSPGERATFSCRASQSIGSNLAWYQQKPGQAPRLLIYGASSRATGIPDR
FSGSGSGTEFTLTISSLEPEDFAVYYCQKYSSSP
>V26RF-JABR01076261.1-igkv |(17937, 18237)|2.51761581813|(0.964,0.896,0.790)|1
VRCDIQMTQSPSFLSASVEDTVTITCQVSQSISNDLAWYQQKPGKSPTLLIYDATNLHPG
FPSRFSGSGSGADYSLTISSLELEDFAAYYCQQEYSYP
>V27RF-JABR01076261.1-igkv |(78882, 79179)|2.93443797113|(0.998,0.949,0.997)|1
RCDIQMTQSPSSLSASVGDRVTITCRASQSFSSSLAWYQQKLGKAPKLLIYGASSLQSGI
PSRFSGSKSGTDFTLTISSLQPEDVAAYYCQQYYSYP
>V28RF-JABR01076261.1-igkv |(91397, 91697)|2.60225330366|(0.988,0.783,0.986)|1
ARCDIQMIQSPSSLPASVGDRVTITCRASQGISSYLNWYQQKPGKAPKLLIYYATTLQSG
VPSRFSGSGSGTEFTLTISSLQPEDFAVCYCQQHNSYP
>V29RF-JABR01076261.1-igkv |(111081, 111379)|2.98974003277|(0.999,1.000,0.991)|1
ARCDIQMTQSPSSLSASVGDRVTITCRASQGISSYLNWYQQKPGKAPKLLIYAASSLASG
VPSRFSGSGSGTEFTLTISSLQPEDFAAYYCQQYNSA
>V30RF-JABR01076261.1-igkv |(121606, 121906)|2.39977989457|(0.973,0.708,0.964)|1
TTGEIVMTQSPATLSLSPGERATLSCRASQSAGSNLAWYQQKPRQAPRLLIYGASSRATG
IPARFSGSGSGTDFTLTISSLEPEDVGIYYCQQYNDWP
>V31RF-JABR01076261.1-igkv |(164504, 164804)|2.9958720041|(0.996,1.000,1.000)|1
ARCDIQMSQSPSSLSASVGDRVTITCQASQGISNALAWYQQKPGKAPKLLIYDASSLDSG
VPSRFSGSGSGTEFTLTISSLQPEDFATYYCQQYNSDP
>V32RF-JABR01076263.1-igkv |(15350, 15650)|2.98742416586|(1.000,1.000,0.988)|1
ARCDIQMTQSPSSLSASVGDRVTITCQASQGISSYLSWYQQKPGKAPKLLIYKASSLASG
VPSRFSGSGSGTEFTLTISSLQPEDFAAYYCQQHNSLP
>V33RF-JABR01076263.1-igkv |(29170, 29470)|2.38903463476|(0.985,0.783,0.846)|1
ARCDIQMIQSPSSLPASVGDRVTITCRASQGISSYLNWYQQKPGKAPKLLIYYATTLQSG
VPSRFSGSGSGTEFTLTISSLQPEDFAAYYCLQHNSDP
>V34RF-JABR01076263.1-igkv |(35502, 35802)|2.99899600001|(1.000,1.000,0.999)|1
ARCDIQMTQSPSSLSASVGDRVTITCQASQGISSWLAWYQQKPGKAPKLLIYKASSLQSG
VPSRFSGSGSGTEFTLTISSLQPEDFATYYCQQHNSNP
>V35RF-JABR01076263.1-igkv |(51711, 52011)|2.92674172101|(0.998,0.971,0.965)|1
TTGEIVMTQSPATLSLSPGERATLSCRASQSVSSRLVWYQQKHGQAPTLLIYGASSRATG
IPARFSGSGSGTDFTLTISSLEPEDVGVYYCQQDYSWP
>V36RF-JABR01076263.1-igkv |(105623, 105923)|3.0|(1.000,1.000,1.000)|1
ARCDIQMTQSPSSLSASVGDTVTITCQASQGISSYLAWYQQKPGKAPKLLIYAASTLQSG
VPSRFSGSGSGTDFTLTISSLQPEDFATYYCQQYNSNP
>V37RF-JABR01076263.1-igkv |(125399, 125698)|2.95174839429|(0.976,0.989,0.988)|1
TTGEIVMTQSPATLSLSPGERATLSCRASQSVGSYLAWYQQKPGQAPRLLIYGASSRATG
IPDRFSGSGSGTEFTLTISSLEPEDFAVYFCQHYNNWN
>V38RF-JABR01076264.1-igkv |(9604, 9904)|2.60286812329|(0.992,0.993,0.781)|1
ARCDIQMTQSPSSLSASIGDTVTITCHASQSISSWLAWYQQKPGKAPKLLIYKASSLQSG
VPSRFSGRGSGTDFTLTISSLQPEDFATYYCQKCNSNP
>V39RF-JABR01076265.1-igkv |(8185, 8485)|2.80454932993|(0.998,1.000,0.870)|1
TTGEIVMTQSPATLSLSPGERATLSCRASQSVSSYLAWYQQKPGQAPRLLIYGASSRATG
IPARFSGSGSGTDFTLTISSLEPEDVAVYYCQQGSNLP
>V40RF-JABR01076266.1-igkv |(4594, 4894)|3.0|(1.000,1.000,1.000)|1
ARCDIQMTQSPSSLSASVGDRVTITCQASQGISNYLAWYQQKPGKAPKLLIYKASTLQSG
VPSRFSGSGSGTDFTLTISSLQPEDFATYYCQQGNSYP
>V41RF-JABR01076266.1-igkv |(22548, 22848)|2.99798400013|(1.000,1.000,0.998)|1
ARCDIQMTQSPSSLSASVGDRVTITCQASQGISSYLAWYQQKPGKAPKLLIYDASTLQSG
VPSRFSGSGSGTDFTLTISSLQPEDFAAYYCQQGNSNP
>V42RF-JABR01080842.1-trav |(1737, 2024)|2.3915649849|(0.885,0.726,0.877)|1
LSGEDQVTQSPEALRLREGESSSLNCSYTVSSLRGLLWYRQDPGKGPEFLFILYSAGEEK
EKERLKATLTKKESFLHITGPKPEDSATYLCAVQ
>V43RF-JABR01088351.1-igkv |(10561, 10879)|2.92644883371|(0.997,0.952,0.986)|1
TSGDIVMTQTPLSLPVTPGEPASISCRSSQSLLDSDDGYTYLDWYLQKPGQSPQLLIYEV
SNRASGVSDRFSGSGSGTDFTLKISRVEAEDVGVYYCMQSIEYP
>V44RF-JABR01088351.1-igkv |(62711, 63011)|2.99799600001|(0.999,1.000,0.999)|1
ARCDIQMTQSPSSLSASVGDRVTITCRASQSINKELSWYQQKPGKAPTLLIYAASSLQTG
VSSRFSGSGSGTDFTLTISSLQPEDVATYYCLQDYTTP
>V45RF-JABR01088351.1-igkv |(74390, 74708)|2.3552539273|(0.864,0.698,0.904)|1
SSGEIVMTRTPLSLPITPGEPASISCRSSQSLMDGDDGFTYLYWYLQKPGQSPQLLMHFA
SYRASGVPDRFSGSGSGTDFTLEISKVEAEDIGVYYCMQALELP
>V46RF-JABR01088351.1-igkv |(103867, 104182)|2.4778902501|(0.993,0.731,0.994)|1
SSGDIVMTQTPLSLPVIPGEPASISCRSSQSLLHSNGYTYLDWYLQKPGQSPQLLIYLGS
NRASGVPDRFSGSGSGTDFTLKISRVEAEDVGVYYCMQALEFP
>V47RF-JABR01088351.1-igkv |(113703, 114003)|2.94725569424|(0.998,0.974,0.979)|1
ARCDIQMTQSPSSLSASVGDRVTITCRASQGISNDLAWYQQKLGETPKLLIYDASSLQSG
IPSRFSGSGSGADFTLTISSLQPEDFATYYCQHYYSAP
>V48RF-JABR01088351.1-igkv |(136166, 136466)|2.997|(0.999,0.999,0.999)|1
ARCDIQMTQSPSSLSASVGDRVTISCQASQNIYSNLGWYQQKPGKAPKLLIYAASTLQSG
VPSRFSGSGSGTDFTLTISSLQPEDVATYYCQHGYSTP
>V49RF-JABR01088351.1-igkv |(159354, 159654)|3.0|(1.000,1.000,1.000)|1
ARCDIQMTQSPSSLSASVGDRITITCQASQGISNDLAWYQQKPGESPKLLIYEASSLQSG
IPSRFSGSGSGTDFTLTISSLQPEDFATYYCQHYYSTP
>V50RF-JABR01088351.1-igkv |(170244, 170542)|2.98237212748|(1.000,0.989,0.994)|1
ARCDIQMTQSPSSLSASVGDRVTISCQASESISDYLNWYQQKPGKAPKLLIYAASTLQSV
VPSRFSGSGSGTDFTLTISSLQPEDFATYYCQHGYGT
>V51RF-JABR01089346.1-ighv |(860, 1169)|2.93990483717|(0.995,0.999,0.953)|1
AQSQVQLVQSGAEVKKPGASVKVSCKASGYNFRSYAISWVRQAPGQGLEWMGVIIPIRSR
TSYAQKFQGRVTITADTSTSTAYMELSSLRSEDMAVYYCAR
>V52RF-JABR01090264.1-ighv |(61, 375)|2.13850004009|(0.842,0.607,0.902)|1
VWSQVTLKESGPALVKPTQTLTLTCTFSGFSISTSGTGMGWIRQPSGKALEWLASIYWNY
SKYYSTSLKSRLTISKDTSKNQVVLTMTNMDPVDTATYYCAHI
>V53RF-JABR01091180.1-ighv |(15340, 15652)|2.682688475|(0.986,0.813,0.997)|1
VLSQVQLQESGPAVVKPSETLSLTCAVSGGSISSYYYWSWIRQPPGKGLEWIGYIYGSGG
STYYNPSLKSRVTISTDTSKNQFSLKLSSVTAADTAVYYCAR
>V54RF-JABR01091180.1-ighv |(60296, 60605)|2.98196800026|(0.994,0.996,0.992)|1
VQCEVQLVESGGGLVQPGGSLRLSCAASGFTFSSYWMSWVRQAPEKGLEWVSYINSDGSS
TSYADSMKGRFTISRDNAKNSLYLQMNSLRAEDRAVYYCVR
>V55RF-JABR01091180.1-ighv |(68033, 68348)|2.99074003277|(1.000,0.992,0.999)|1
VQCEVQLVESGGGLVQPGGSLRISCAASGFTFSSSAMHWVRQASGKGLEWVGRIRSKSKN
YATDYAASVKGRFTISRDDSKNTAYLQMNSLKTEDTAVYYCTT
>V56RF-JABR01091180.1-ighv |(78923, 79238)|2.98553608204|(1.000,0.996,0.990)|1
VQCEVQLVESGGGLVQPEGSLRLSCAASGFTFSSYYMHWVRQAPGKGLEWVGLIKNKANS
YTTEYAASVKGRFTISRDDSKNTLYLQMSSLKTEDTAVYYCAR
>V57RF-JABR01092448.1-trbv |(783, 1083)|2.33720910688|(0.868,0.711,0.853)|1
HTDAGVIQSPRHEVTEMGKEVTLRCEPISGHSSLFWYRQTMMRGLEFLIYFNNKSPIDDS
GMPKDRFSAKMPDASFSTLRIQPSEPRDSAVYFCASSL
>V58RF-JABR01092448.1-trbv |(15339, 15639)|2.17742702232|(0.786,0.905,0.632)|1
LIDAGVTQTPRHKVTEIGQEVTMRCQPILGHNTVFWYRQTMMQGLELLVYLRNKASLDDS
GMPKDRFSAEMPDASLATLKIQPSEPRDSAVYLCASGL
>V59RF-JABR01092448.1-trbv |(22332, 22623)|1.73869171992|(0.939,0.762,0.572)|1
PGVTQFPSHRVIEKGQTVTLRCDPISGHDYLYWYRRVIGKEIKFLIYFMRASMQDESGMP
KKRFSAERTGGTYSTLKLQPAELEDSGVYFCASSQ
>V60RF-JABR01092448.1-trbv |(27430, 27727)|2.02466708114|(0.887,0.766,0.642)|1
HGDVMVIQNPRYQVTQSGKPVTLSCSQNLNHKVMYWYQQKPSQAPKLLFHYYDKDFNNEA
DTPDNFQSRRPNTSFCFLDIRSPGLEDAAVYLCASSK
>V61RF-JABR01092448.1-trbv |(32724, 33024)|2.48916983416|(0.904,0.909,0.758)|1
SPGEEVTQTPKHLVKGEGQKAKLYCAPITGHSYVFWYQQVLKKEFKFLISFQNEDVVDET
QMPKERFSAKCPRNSPCSLEIQATKLKDSATYFCASSQ
>V62RF-JABR01092448.1-trbv |(49780, 50073)|2.34400196921|(0.860,0.797,0.750)|1
LSNAGITQNPRHLVRRRGQEARLRCSPMKGHSHVYWYQQLPEEGLKFMVYLQKEKIIDES
GMPKERFSAEFPKEGPSILRIQQAEQEDSAAYFCAS
>V63RF-JABR01092448.1-trbv |(70823, 71123)|2.3240998421|(0.945,0.680,0.944)|1
STDTKVTQRPRLLVKANEQKAKMECVPIKGHSYVYWYRKKLDEELKFLVYFQNEVIIQKA
EIINERFSAQCPQNSSCTLEIQSTESGDAALYFCASSK
>V64RF-JABR01092448.1-trbv |(79737, 80037)|2.91597825001|(0.992,0.970,0.960)|1
SFHAKVTQTPGYLVKGKGQKTKMDCTPEKGHTFVYWYQQNQNKEFTFLISFQSEQVLQET
ELHKKRFSSQCPKNPPCSLEILSSEPGDTALYLCASSQ
>V65RF-JABR01092448.1-trbv |(88946, 89244)|2.89772588623|(0.989,0.980,0.939)|1
SMDADVTQTPRNMIAKTGKRIMLECSQTKGHDQMYWYRQDPGLGLRLIYYSFDVKDINKG
EISDGYSVSRQEQAQFSLSLESATPNQTALYFCATSD
>V66RF-JABR01092448.1-trbv |(97426, 97723)|2.98993600205|(0.998,0.998,0.994)|1
LMEADIYQNPRHRVIGTGKKITLECSQTMGHDKMYWYQQDPGMELHLIHYSYGVNSTERG
DFSSESTVSRIRIEHFPLTLESASPSHTSQYLCASSE
>V67RF-JABR01092448.1-trbv |(131672, 131979)|2.14673712663|(0.846,0.891,0.613)|1
PLEAQVTQNPRHLITVTGKKLTVTCSQNMNHEYMSWYRQDPGLGLRQIYYSINVEVIDKG
DIPEGYNVSRKEKTNFPLILESPSPSQTSLYLCASSLSTV
>V68RF-JABR01092448.1-trbv |(137251, 137558)|2.85636962134|(0.988,0.903,0.994)|1
LVDVKVTQSSRHLIKRMGEKVFLECVQDMDHERMFWYRQDPGLGLQLIYFSYDVKVNEKG
DIPEGYSVSREKKERFSLILGSASTNQTSMYLCASSLSTA
>V69RF-JABR01094257.1-igkv |(894, 1187)|2.55041233715|(0.922,0.836,0.845)|1
LASISCRSSQSLLHSDGKTYLNWYLQKPGQSPQLPIYTVSNQASGVQERFSGSGSGTDFT
LKISRVEAEDVGVYYCMQDTQIPPIVIQPLLEWLSC
>V70RF-JABR01095741.1-trbv |(135018, 135328)|1.65802551041|(0.532,0.656,0.832)|1
SMDTGITQTPKYLVTGMGSKRMMKREHLGHDSLYWLREKAKKSLEFMFYYNCKELIENKT
VPSHFTPECPDSSRLYLHVFALQPEDSALYLCASSQDTALQ
>V71RF-JABR01095741.1-trbv |(145128, 145425)|2.17405488146|(0.948,0.994,0.609)|1
SLDTAVSQTPKYLVTQMGKKESLKCEQNLGHDTMYWYKQDSKKLLQIMFSYNNKELIINE
TVPNRISPDSPDKAHLILHIKSLELGDSAVYFCASSQ
>V72RF-JABR01095741.1-trbv |(149740, 150037)|2.6950318509|(0.949,0.868,0.910)|1
PTDAGVTQTPKHLVMGMTNKKSLKCEQHMGHRAMYWYKQKAKKPPEIMFMYNYEQLSINE
SVPSRFSPECSKSSLLNLHLQALQPEDSALYLCASSQ
>V73RF-JABR01095742.1-trbv |(5770, 6070)|2.75575248181|(0.954,0.929,0.891)|1
HTEPEVTQTPSHRVTQMGQEVILRCVPISNHLYFYWYRQILGQKVEFLVYFYNDEISEKS
EIFDDRFSVGRPDGSNFTLKIKSTKLEDSAMYFCASSE
>V74RF-JABR01095742.1-trbv |(13381, 13677)|2.0880828539|(0.885,0.971,0.577)|1
SLDTAVSQTPKYLVTQMGKKESLKCEQNLGHDAMYWYKQDSKKLLKIMFSYNNKELILNE
TVPNRISPDSPDKAHLILHIKSLELGDSAVYFCASTK
>V75RF-JABR01095742.1-trbv |(32732, 33020)|2.57762585507|(0.907,0.876,0.825)|1
TGVTQTPKHLVMGMTNKKSLKCEQHLRHNAMYWYKQKAKKPPELMFSFNYEKLSLNESVP
SRFSPECSKSSLLYLHVHALQPEDSALYLCASSQ
>V76RF-JABR01189674.1-iglv |(736, 1045)|2.99089600501|(0.995,0.996,1.000)|1
SWAQSVLTQPPSASGAPGQSVTISCSGSSSNIRGNGVHWYQQLSGTAPKILIYNNNQRPS
GVPDRFSGSKSGTSASLAITGLRSEDEADYYCEAWDDSLSA
>V77RF-JABR01196792.1-trbv |(5405, 5708)|2.92774002125|(0.977,0.970,0.981)|1
SVFSALVSQKPSRDVCQRGTSVTIQCQVDSQVTMMFWYRQQPGQSLTLIATANQGSEATY
EGGFVIDKFPISRPNLTFSTLTVSNTSPEDSSIYLCSVE
>V78RF-JABR01004697.1-ighv |(11840, 12149)|2.99067605248|(1.000,0.991,1.000)|-1
VQGEVQLVESGGGLVQPGGSLRLSCAASGFTFGDYAMSWVRQAPGKGLEWVSYISSASST
IYYADSVKGRFTISRDNAKNTLSLQMNNLRAEDTAVYYCAK
>V79RF-JABR01004697.1-ighv |(62563, 62872)|2.10911224469|(0.678,0.726,0.722)|-1
AQSQVQLVQSGAEVRKPGDSVKVSCKASGYTFTNHNVDWVRQAPGQGLVWMGGINTNTGG
TSCAQTFQGRVTMTRDTSTSTAFMELSCLRSEDTAVYYCAR
>V80RF-JABR01004697.1-ighv |(71645, 71954)|2.70791495703|(0.937,0.966,0.843)|-1
AHSQVQLVQSGAEIKQPGASVKVSCKASGYTFTSYYMHWVRQAPGQGLEWIGLISPYNGN
TGYAQNFQGRVTMTTDTSTSTGYMEMSSLRSEDTAVYYCTR
>V81RF-JABR01004698.1-ighv |(7380, 7689)|2.7635657599|(0.914,0.887,0.986)|-1
VQCELQLVESGGDLVQPGGYMRLSCAASGFTFSNYCISWVCQAPEKGLEWVSRINRDGSS
TYYADSMKGQVTISRENAKNTLYLQMNNLRAEDKAVYYCTR
>V82RF-JABR01004698.1-ighv |(16088, 16403)|3.0|(1.000,1.000,1.000)|-1
VQCEVQLVESGGGLVQPGGSLRLSCAASGFTFSSSAMHWVRQASGKGLEWVGRIRSKSNN
YATDYAASVKGRFTISRDDSKNTLYLQMNSLKTEDTAVYYCTT
>V83RF-JABR01011024.1-ighv |(77, 386)|2.97019216959|(0.991,0.980,1.000)|-1
VQCEVQLVESGGGLAKPAGSLRLSCAASGFTFSSYGMHWVRQAPGKGLEWVSYINSGGGS
TRYADSVKGRFTISRDNAKNTLYLQMDSLRAEDTAVYYCAR
>V84RF-JABR01032523.1-igkv |(5692, 6004)|2.38465230841|(0.828,0.759,0.817)|-1
CNGDIVLTQSPASLAVSPGQRATITCRASESVNFFGINLIHWYQQKPGQPPKLLIYQVSN
KDTGVPARFSGIGSGTDFTLTINPVEADDAANYYCLQSKNFP
>V85RF-JABR01035059.1-ighv |(16381, 16696)|2.99696400065|(1.000,1.000,0.997)|-1
VQCEVQLVESGGGLVQPGGSLRLSCAASGFTFSNYWMGWVRQAPGKGLEWVGRIKKTTDG
GTAEYAASVKGRFTISRDDSKNTLYLQMNSLKTEDTAVYYCAR
>V86RF-JABR01035059.1-ighv |(36195, 36504)|2.82869332738|(0.987,0.886,0.996)|-1
VQGEVQLVESGGGLAKPAGSLRLSCAASGFTFSSYWMNWVRQAPGKGLEWVSAINSGGGS
TYYADSVKGRFTISRDNSKNMLYLQMNNLRAEDTAVYYCAR
>V87RF-JABR01035060.1-ighv |(7723, 8038)|2.98171202074|(0.994,0.988,1.000)|-1
VKCEAQLMESGGGLVQPGGSLRLSCAASGFTFSDHYMQWVRQAPGKGLEWVGLIRNKADG
ETTDYAASVKGRVTISRDDSKSITYLQMSSLKTEDTAVYYCAR
>V88RF-JABR01035060.1-ighv |(11223, 11532)|2.9700882474|(1.000,0.973,1.000)|-1
VLSQVQLQESGPGLVKPSETLSLTCAVSGGSLSGYYWGWIRQPPGKGLEWIGYISGSSGS
TNYNPSLKSRVTISTDTSKNQFSLKLSSVTAADTAVYYCAR
>V89RF-JABR01035060.1-ighv |(22673, 22982)|2.72941013462|(0.998,0.837,0.993)|-1
VQGEVQLVESGGGLVQPEGSLRLSCAASGFTFSSYGMSWVRQAPGKGLEWVAVIWYDGSQ
KYYADSVKGRFTISRDNAKNTLYLQMDSLRAEDTAVYYCAK
>V90RF-JABR01035060.1-ighv |(72220, 72526)|2.42987132234|(0.982,0.989,0.712)|-1
CAEVQLVQSGAEVKRPGESLKISCKTSGYSFTSYWISWVRQMPGKGLEWMGMIYPGDSDT
RYSPSFQGQVTISADKSISTTYLQWSSLKASDTATYYCAK
>V91RF-JABR01039933.1-trbv |(3008, 3306)|1.63059865717|(0.538,0.533,0.562)|-1
MSAIELVPEHQTVTVSVGNPATLRCSMKGEAISNYYINWYRKTQDNTMTFIYREKGIYGP
GFKDNFQGDIDTEENQAVLKILAPSERDEGSYYCASD
>V92RF-JABR01039935.1-trav |(11370, 11672)|1.50901564364|(0.579,0.434,0.879)|-1
VSAAKNEVEQSPQDLTAQEGEFITINCSYSIGINALHWLQQHPGRGIVSLFMLSSEKKKN
GRLIATINIQERHSSLHITASQPRDSAIYICAVRHSALQ
>V93RF-JABR01039937.1-trav |(16162, 16450)|2.94170803341|(0.979,0.987,0.976)|-1
LSGELKVGQNPLFLSTQEGRNYTVYCNYSTASDRLYWYRQNPGKSLESLFVLLSNGAVKQ
EGRLMASLDTKARLSTLYITAALQDLSATYFCAV
>V94RF-JABR01041956.1-igkv |(1660, 1960)|2.689738994|(0.869,0.905,0.942)|-1
TAGQVILTQSPATLSLSTGEIATLSCRASQSVNRYLAWYQQKPGQAPRLLIYGASSRATG
IPDRFSGSGSGTEFTLTISSLEPEDVGVYHCYQYNSRY
>V95RF-JABR01049702.1-ighv |(5414, 5728)|2.96820155558|(0.996,0.999,0.975)|-1
VQCEVQLVESGGGLVQPGGSLRLSCAASGFTFSDHYLSWVRQAPGKGLEWVSFMRNNANG
GRTEYAASVKGRCTISRDDSKSITSLQMSSLKTEDTAVYYCAR
>V96RF-JABR01055994.1-ighv |(3382, 3691)|2.96317355698|(0.994,0.998,0.973)|-1
AQSQVQLVQSGAEVKKPGASVKLSCKASGYTFTSYNINWVRQAPGQGLEWMGWINPSSGS
TGYAQNFQGRVTMTRDTSTSTAYMELSSLRSEDTAVYYCAR
>V97RF-JABR01061517.1-igkv |(4119, 4433)|1.92613777118|(0.960,0.688,0.728)|-1
SSGDVVMTQTPLSLPVTPGEPASISCRSSESLLHSNGNTYLHWYLQKPGQSPQLLIYKVT
NRESGVPDRFSGSGSGTDFTLKISRVEPEDVGVYYCMQGTKAP
>V98RF-JABR01061517.1-igkv |(25345, 25645)|2.98192000218|(0.992,0.994,0.996)|-1
ARCDIQMTQSPSSLSASVGDRVTITCRSSQGINNYLSWCQQKPGKAPKPLIYYASSLETG
VPSRFSGSGSGTDFTLTISSLQPEDIATYYCQQYDNLP
>V99RF-JABR01063291.1-ighv |(13950, 14265)|2.85687924749|(0.962,0.998,0.912)|-1
VQCEVQLVESGGGLVQPGGSLRLSCAASGFTFSNHYMHWVHQAPGKGLEWVGFIRNNANG
ATTEYAASVKGRFTISRDDSKSVASLQMNSLKTEDTAVYYCAR
>V100RF-JABR01063291.1-ighv |(28996, 29310)|1.95197067706|(0.788,0.735,0.588)|-1
VLSQVTLKESGPALVKPTQTLTLTCTFSGFSLSTSGMGVGWIRQPPGKALEWLALIYWDD
DKRYSPSLKSRLTISKDTSKNQVVLTMTNMDPVDTATYYCVRR
>V101RF-JABR01064858.1-igkv |(492, 807)|2.67527016925|(0.962,0.834,0.944)|-1
SSGDVVMTQSPLSLPVTPGQPASISCRSSQSLVHSDGNTYLSWFQQKPGQPPRRLIYKVS
NRDSGVPDRFSGSGAGTDFTLKISRVEAEDVGVYYCLQGTYFP
>V102RF-JABR01067077.1-igkv |(7134, 7447)|2.33710936362|(0.920,0.971,0.673)|-1
SSGDVVMTQTPLSLSVTPGEPASISCRSSQSLLHSNGNTYLHWYLQKPGQSPQLLIYKVT
NRESGIPDRFSGSASGTDFTLKINRVEHEDVGVYYCMQSTKF
>V103RF-JABR01068488.1-ighv |(524, 833)|2.79258842965|(0.940,0.949,0.908)|-1
AQSQVQLVQSGAEVKKPGASVKVSCKASGYNFRSSAISWVRQAPGQGLEWMGVIIPILSR
TNYAQKFQGRVTITADTSTSTAYMELSSLRSEDTAVYYCTR
>V104RF-JABR01071855.1-iglv |(8003, 8306)|2.99696400065|(1.000,1.000,0.997)|-1
SWAQSALTQPPSVSGSPGQSVTISCTGTSSDVGGYNYVSWYQQHPGTAPKLMIYDVSNRP
SGVSDRFSGSKSGNTASLTISGLQAEDEADYYCCSYAGS
>V105RF-JABR01071855.1-iglv |(31384, 31694)|2.98028822908|(0.997,0.984,1.000)|-1
SWAQSALTQPRSVSGSPGQSVTISCTGTSNDVGSYNSVSWYQQHPGKAPKLVIYEVSKRP
SGVSDRFSGSKSGNTASLTISGLQAEDEADYYCSSYAGSGT
>V106RF-JABR01071855.1-iglv |(60946, 61249)|2.96581638724|(0.997,0.983,0.987)|-1
SAASYELTQPPSVSVSPGQTARITCSGDTLPDNYAYWFQQKPGQSPVLIIYEDSKRPSGI
PERFSGSSSGTVATLTISGAQVEDEADYYCYSSDSSGNH
>V107RF-JABR01071855.1-iglv |(71726, 72036)|2.94355571893|(1.000,0.954,0.998)|-1
SWAQSALTQPPSVSGSPGQSVTISCTGTSSDIGGYNYVSWYQQHPGTALKLMIYGVSNRP
SGVSDRFSGSKSGNTASLTISGLQAEDEADYYCSSYSSSYY
>V108RF-JABR01071855.1-iglv |(89714, 90006)|1.94889730286|(0.747,0.837,0.546)|-1
CPDSASLSGSSGQLVTISCTGTSSDVGSYNIVSWYQQHPGTGPQLMIYHVSYRPSGVPDR
FSGSKSGNTASMIISGFQVEEEADYYCYSYTSSIT
>V109RF-JABR01071856.1-iglv |(32028, 32337)|2.03956487745|(0.699,0.686,0.661)|-1
CFSLFPGSWAQSALTQPRSVSGSPGQSVTISCTGTSSDVGHYNCFLVSSAPRHMIYGVSK
WPSGVSDHFSGSKSGNTVSMTISGLQAEDEADYYCCSYAGS
>V110RF-JABR01071856.1-iglv |(35802, 36107)|2.9230935653|(0.984,0.963,0.978)|-1
SVASYELTQPPSVSVSPGQTAKITCSGDILAKYYAQWYQQKPGQAPVLVIYKDSERPSGI
PERFSGSSSGTTVTLTISRAQAEDEADYYCYSGDDNNLTV
>V111RF-JABR01071856.1-iglv |(45472, 45775)|2.99280401921|(1.000,1.000,0.993)|-1
SWAQSALTQPRSVSGSPGQSVTISCTGTSNDVGSYNSVSWYQQHPGKAPKLVIYEVSKRP
SGVSDRFSGSKSGNTASLTISGLQAEDEADYYCCSYTTS
>V112RF-JABR01071856.1-iglv |(57958, 58263)|2.4539048149|(0.956,0.723,0.971)|-1
FVASYELTQPPSVSVSPRQTARITCGGDNIGSKAVHWYQQKPAQAPVLVIYNDSERPSGI
PERFSGSNSGNTATLTISGVQAGDEADYYCQVWDSSSATV
>V113RF-JABR01071856.1-iglv |(64968, 65271)|2.87060823243|(0.997,0.924,0.973)|-1
SVVSSELTQDPAVSVALGQTVKITCQGDSLSSYYASWYQQKPGQVPVLVIYGNSNRPSGI
PDRFSGSYSGNTASLTITGAQVEDEADYYCGSWDSSGNY
>V114RF-JABR01071856.1-iglv |(85218, 85521)|2.76415824799|(0.997,0.850,1.000)|-1
SAASYELTQPPSESVSPGQTARITCGGDNIGSKAVHWYQQKPAQVPVLVIYSDSNRPSGI
PERFSGSNSGNTATLTISGVEAGDEADYYCQVWDSSSDH
>V115RF-JABR01071856.1-iglv |(104914, 105224)|2.9763601679|(0.995,0.983,0.999)|-1
SWAQSALTQPRSVSGSPGQSVTISCTGTSSDIGGYNLVSWYQQHPGTAPKLVIYDVSKRP
SGVSDRFSGSKSGNTASLTISGLQAEDEADYYCCSYAGSDT
>V116RF-JABR01071856.1-iglv |(114426, 114723)|2.75073242179|(0.919,0.959,0.884)|-1
SVASYELTQPPSVSVSPGQTARITCSGDVLKENYADWYQQKPGQAPVLVIHEDSKRPSGI
PEQFSGSTSGDTNTLTISSSLSEDEADYYCFSGNENN
>V117RF-JABR01071856.1-iglv |(122751, 123054)|2.98674003277|(0.998,0.990,0.999)|-1
SAASYDVTQPQSVSVSPGQTARITCGGDNIGSKAVHWYQQKPAQAPVLVIYDDSERPSGI
PERFSGSNSGNTATLTISGVEAGDEADYYCQVWDSSSDH
>V118RF-JABR01071859.1-iglv |(21796, 22105)|2.98079201242|(0.993,0.989,0.999)|-1
SWAQSVLTQPPSASEAARKSVTISCSGSSSNIGSNRVSWYQQLPGTAPKLLIYNNNQRPS
GVPDRFSGSKSGTSASLAISGLQTEDEADYYCAAWDDSLSS
>V119RF-JABR01071860.1-iglv |(8080, 8387)|1.87706600195|(0.854,0.792,0.552)|-1
SNSQAVVTQEPSLTVSPGGTVTLTCASSTGAVTSGNYPYWFQQKPGQAPTALIYATSSKH
SWTPARFSGSILGGKAALTLSGAQPEDEADYYCSLYYSGA
>V120RF-JABR01071860.1-iglv |(15235, 15523)|2.08436398037|(0.864,0.577,0.961)|-1
SPGASARLTCTLGSGISVGSYSIYWYQQKPGSPPRYLLYYYSDSDKGLGSGVPSRFSGSK
DASANTGILLISGLQSEDEADYYCAVSYSSASHS
>V121RF-JABR01071860.1-iglv |(31436, 31745)|2.95506581776|(1.000,0.971,0.988)|-1
SWAQSVLTQPPSVSGVPGQKVTISCTGSSSNIGGYYVQWYQQLPGTAPKLLIYQDNKRPS
GVSDRFSGSKSGTSASLAITGLQSEDEADYYCGTWDSSLNG
>V122RF-JABR01071860.1-iglv |(36557, 36866)|2.99798400013|(1.000,0.998,1.000)|-1
SWAQSVLTQPPSVSGAPGQKVTISCTGSSSNIGGYYVSWYQQLPGTAPKLLIYQDNKRPS
GISDRFSGSKSGTSASLAITGLQTEDEADYYCQSYDSSLSG
>V123RF-JABR01071861.1-iglv |(13029, 13339)|2.52633352287|(0.875,0.869,0.803)|-1
SLSQPVLTQPASLSASPGASASLTCTFSGGINVAGYHIHWYQQKPGSPPRYLLWYKSDSD
KHQGSGVPSHFSGSKDASANTGILRISGLQSEDEADYYCAI
>V124RF-JABR01071861.1-iglv |(18449, 18758)|2.98367205249|(0.998,0.989,0.997)|-1
SWAQSVLTQPPSASGIPGQSVTISCSGSSSNIGSNNVYWYQQFPGTAPKLLIYNNNQRPS
GVPDRFSGSKSGTSASLAISGLRSEDEADYYCEAWDDNLSG
>V125RF-JABR01071862.1-iglv |(27039, 27346)|1.85974576427|(0.792,0.831,0.512)|-1
SNSQAVVTQEPSLTVSPGGTVTLTCGSSTGAVTSGNYPYWFQQKPGQAPRALIYNTNSKY
SWTPARFSGSLAEGKAALTLSGAQPEDEAEYYCLLYHSGT
>V126RF-JABR01071862.1-iglv |(60745, 61055)|2.5208145651|(0.978,0.913,0.785)|-1
SLSQPVLTQPASLSASPGASASLTCTFSSGINVAGYTIHWYQQKPGSPPRYLLRYKSDSD
KHQGSGVPSRFSGSKDASANTGILRISGLQSEDEADYYCAI
>V127RF-JABR01071862.1-iglv |(65675, 65984)|2.99089600501|(0.995,0.996,1.000)|-1
SWAQSVLTQPPSASGAPGQSVTISCSGSSSNIRGNGVHWYQQLSGTAPKILIYNNNQRPS
GVPDRFSGSKSGTSASLAITGLRSEDEADYYCEAWDDSLSA
>V128RF-JABR01071862.1-iglv |(83033, 83345)|2.97306587284|(0.999,0.977,0.999)|-1
SWAQSVLTQPPSVSGTPGQRVTISCTGSSSNIGVGYYVSWYQQLPGTAPKLLIYQDNKRP
SGISDRFSGSKSGTSASLAITGLQSEDEADYYCQSYDNSLSG
>V129RF-JABR01071862.1-iglv |(111105, 111415)|2.94938667423|(0.996,0.962,0.996)|-1
SLSQPVLTQPTSLSASPGASARLTCTLSSGINVGSYRIFWYQQKPGSAPRYLLSYYTDSD
KHQGSGVPSRFSGSKDASANAGILLISGLQSEDEADYYCMI
>V130RF-JABR01071862.1-iglv |(116435, 116744)|2.92138299634|(0.980,0.950,0.996)|-1
SWAQSVLTQPRSASGTPGQRVTISCSGSSSNTGSNYVSWYQQLPGTAPKPLIYYDDKQAS
GVSDRFSGSKSGTSASLAISGLQSEDEADYYCATWDNSLSG
>V131RF-JABR01077598.1-igkv |(2147, 2457)|1.89698631538|(0.656,0.648,0.604)|-1
SLSQPVLTQSPSASASLGASVKLTCTLSSGHSSYTIAWHQQQPEKAPRYLMKLNSDGSHS
KGDGIPDRFSGSSSGAERYLTISNLQSEDEADYYCQTWDTG
>V132RF-JABR01077601.1-iglv |(19390, 19700)|2.95136527997|(0.992,0.972,0.989)|-1
SWANFMLTQPHSVSGSVGQKVVISCTRSSGSIGSYYVQWYQQRPGSAPTTVIYDDNERPS
GVPDRFSGSIDSSSNSASLTISGLETEDEADYYCQSYDSSS
>V133RF-JABR01077601.1-iglv |(49250, 49551)|1.89828013934|(0.752,0.525,0.942)|-1
VQAGLTQPPSVSKGLRQTATLTCTGSSNNVGNQGAAWLQQHQGHPPKLLSYRNNNRPSGI
SERFSASRSGNTASLTITGLQPEDEADYYCSAWDSSLS
>V134RF-JABR01077601.1-iglv |(59589, 59901)|2.99798400013|(1.000,0.998,1.000)|-1
SWAEVVFTQPHSVSGSPGQTVTISCTRSSGSIGSYYVQWYQQRPGSAPTTVIYNDNKRPS
GVPDRFSGSIDSSSNSASLTISGLKSEDEADYYCQSAADSYS
>V135RF-JABR01077603.1-iglv |(14585, 14894)|2.96887652911|(0.997,0.981,0.992)|-1
VDSETEVTQEPSLSVSPGGTVTLTCGLSSGSVSTSNYPSWYQQTPGQAPRMIIYNTNTRP
SGVPDRFSGSILGNKAALTITGAEADDESDYYCVLYMGSGI
>V136RF-JABR01077916.1-ighv |(11011, 11320)|2.99498000014|(0.998,1.000,0.997)|-1
VQCEVQLVESGGDLVKPGGSLRLSCVASGFTFSSYAMHWVRQAPGKGLEWVSVISTSGGS
TYYADSVKGRFTISRDNAKNSLSLQMNSLRAEDTAVYYCAR
>V137RF-JABR01077916.1-ighv |(16007, 16319)|2.9460773318|(0.979,0.970,0.999)|-1
VLSQVQLQESGPGLVKPLETLSLTCAVSGYSISSGYYWSWIRQPPGKGLEWIGRIYGSSG
STDYNPSLKSRVTISKDTSKNQFSLKLSSVTAEDTAVYYCAR
>V138RF-JABR01077917.1-ighv |(3891, 4200)|2.96480001921|(0.991,0.984,0.990)|-1
VLSQVQLQQWGEGLVKPSETLSLTCAVSGGSISSYWWSWIRQPPGKGLEWIGEINGNSGS
TNYNPSLKSRVTISTDTSKNQFSLKLSSVTAADTAVYYCAR
>V139RF-JABR01077917.1-ighv |(15725, 16034)|2.83446662233|(0.983,0.964,0.910)|-1
VQCEVQLVESGGGLVQPGGFLRLSCAGSGFAFSSYGMDWVRQAPGKGLEWVAVISYDGSQ
KYYADSVKDRFTISRDNSKNMLYLQMNNLRAEDTAVYYCAK
>V140RF-JABR01078980.1-ighv |(7987, 8296)|2.97268883957|(0.998,0.996,0.980)|-1
AQSQEQLVQSGAEVKKPGASVKVSCKASGFTFDSYAISWVRQAPGQGLEWMGWIVPDYDI
TNYAQKFQGRVTITADTSTSTAYMELSSLRSEDTAVYYCAR
>V141RF-JABR01086102.1-ighv |(13684, 13993)|2.78640143598|(0.988,0.957,0.886)|-1
AQSQEQLVQSGAEVKKPGASVKVSCKASGYTFSSYAISWVRQAPGQGLEWMGVINPIVGI
TNYAQKFQGRVTITADTSTSTAYMELSSLRSEDTAVYYCAR
>V142RF-JABR01088213.1-trbv |(2386, 2682)|2.89786276126|(0.980,0.957,0.964)|-1
SVDAGVTQSPTHLIKMRGQQVTLRCSPISGHNSVSWYQQALGQGPQLIVQYYREQENGRG
NFPERFSGHQFPNYSSELNVSALLLVDSALYLCASSL
>V143RF-JABR01088213.1-trbv |(19985, 20282)|1.9873059304|(0.905,0.562,0.896)|-1
SVAAGVIQAPRHLIKVKRETATLQCYPIPEHDTVYWYQQGPGQGPQFLISFYEKMQRDKG
SIPDRFSAQQFSDYHSELNMRSLELEDSALYLCASSL
>V144RF-JABR01088213.1-trbv |(27616, 27913)|2.92642949373|(0.986,0.996,0.950)|-1
HMDAGITQSPRHKITETGTPVTLRCHQTENHRYMYWYRQDLGYGLRLIHYSYGVEDTDKV
EVSDGYSVSRSKTEDFLLTLESATHSQTSVYLCASSE
>V145RF-JABR01088213.1-trbv |(44902, 45202)|1.97055016753|(0.739,0.586,0.735)|-1
HTDAGVIQSPRHEVTEMGKEVTLRCEPISGHNSLFWYRQTMMWGLELLIYFNNKAAIDDS
GMPKDRFSAEMPDASLATLKIQPSEPRDSAVYLCASGL
>V146RF-JABR01088214.1-trbv |(3884, 4203)|2.6181499321|(0.857,0.889,0.878)|-1
NAAVTQTPKFQVLKTGQSMTLQCAQDMNHECMSWYRQDPGMGLRLIHYSVAAGVTDKGEV
SNGYNVSRSNTEDFPLSLESAAPSQTSVHFCASSYSQRYKAVSS
>V147RF-JABR01088214.1-trbv |(9866, 10166)|2.96759608|(0.993,0.983,0.992)|-1
HTCAGVSQSPRYKVTKRGQDVTLRCDPISGHEYLYWYQQVPGQGREFLTYFQNDAQLDKS
GLPSDRFSAERPEGSISILKIQRTEQGDSAVYLCASSL
>V148RF-JABR01088214.1-trbv |(18277, 18589)|2.4112521245|(0.920,0.742,0.876)|-1
PVDTGVTQSPTHLIKTRGQQVILRCSPISGHSSVSWYQQALGQGPQFIFEYYKEEERERG
NFPERFSGRQFPNYSSELNVNTLEMGDSALYLCASSLAQPSR
>V149RF-JABR01088214.1-trbv |(26048, 26345)|2.39347284483|(0.974,1.000,0.693)|-1
PGNADVTQTPKFQVLKTGQSMTLQCAQDMNHNYMYWYRQDPGMGLRLIHYSVGAGITDKG
DVPNGYNVSRLNTEDFPLRLELAALSQTSVYFCASSD
>V150RF-JABR01088214.1-trbv |(38458, 38754)|2.4481909444|(0.963,0.928,0.741)|-1
SVDAGVTQSPTHLIKTRGEQVTLRCSPISGHSSVSWYQQALGQGPQFIFEYYEKAERGRG
NFPERFSGLQFPNYSSELNVNALLLGDSALYLCASSL
>V151RF-JABR01088214.1-trbv |(45860, 46151)|2.92322221922|(1.000,0.999,0.939)|-1
NAGVTQTPKFQVLKTGQSMTVQCTQDMNHNYMYWYRQDPGMGLRLIYYSVTAGITTKGEV
SNGYNVSRINTEDFLLRLESAAPSQTSVYFCASSY
>V152RF-JABR01088215.1-trbv |(4946, 5242)|2.88750687711|(0.979,0.964,0.949)|-1
PVQAGVTQSPTYLIKRRGQQVTLRCSPISGHTSVSWYQQALGQGPQFIFEYSNELRTSEG
NFPDRFSGRQFRNYHSEMNVSALELGDSALYLCASSF
>V153RF-JABR01088215.1-trbv |(7599, 7895)|2.70946366626|(0.982,0.946,0.852)|-1
SVDSGVTQTPKHLITAIGQQVTLRCSPRSGDLSVYWYQQSLGQGLQFLIQYYNGKERAKG
NILERFSAQQFPDLHSELNLSSLELGDSALYFCASSL
>V154RF-JABR01088215.1-trbv |(24838, 25129)|2.54318976542|(0.919,0.818,0.860)|-1
AGVAQSPRYKITEKSQAVAFWCDPISGHATLYWYRQILGQGPELLVRFQNEDVVDDSQLP
KDRFSAERLKGVNSTLRIQPAELGDSAVYLCASSL
>V155RF-JABR01088215.1-trbv |(38689, 38986)|1.98160761818|(0.908,0.550,0.926)|-1
HRDARITQSPRYKITETGRQVTLTCHQTWSHNNMFWYRQDLGHGLRLIYYSAGAGVTDKG
EVPDGYVVSRSKTEDFPLTVESATRSQTSVYFCASSE
>V156RF-JABR01088215.1-trbv |(46608, 46908)|2.21156834439|(0.906,0.817,0.690)|-1
LREAGVAQSPRYKVIEKSQAVTFWCNPVSGHATLYWYRQILGQGPELLVQFQNNDVVDDS
QLPKDRFSAERLKGVNSTLKIQPAKLGDSAVYLCASSL
>V157RF-JABR01088215.1-trbv |(64243, 64539)|2.99088400513|(0.998,1.000,0.993)|-1
PVNAGVTQTPKFQVLKTGQSMILQCAQDMNHDYMYWYRQDPGMGLRLIHYSVGAGITDKG
EVSNGYSVSRSNTEDFPLRLESAAPSQTSVYFCASSY
>V158RF-JABR01088215.1-trbv |(68443, 68744)|1.95372843388|(0.916,0.746,0.649)|-1
AGVSQSPRYRVTKRRQEVALRCDPISGHEYLYWYQQAPGQGPEFLIYFRNDAQLDKSGLL
SSRFSAERPKGSVSTLKIQHTEQGDAAVYLCASSLATE
>V159RF-JABR01088215.1-trbv |(76395, 76685)|1.93484702607|(0.904,0.897,0.542)|-1
DAGVTQSPTHLIKTRGQQVTLRCSPISGHTNVYWYQQTLDQGLQFILWYDEEEERDRGTF
PHRFLGLQFPNYSSELNVSALLLGDSALYLCASSL
>V160RF-JABR01088215.1-trbv |(87775, 88076)|2.48474725092|(0.904,0.877,0.773)|-1
AGVLQSPRYRVTKRGQDVTLRCDPISGHEYLYWYQQAPGQGPEFLTYFWNDAQQDKSGLP
SGRFSAERPEGSVSTLKIQPTQQGDSAVYLCASSLATE
>V161RF-JABR01088215.1-trbv |(102278, 102574)|2.17959178456|(0.891,0.982,0.610)|-1
NAGVTQTSKFQVLKTGQNMTVQCAQDMNHNFMYWYRQDPGMGLRLIHYSGAAGTTDKGEV
PNGYNVSRLNTEVFPLRLESAAPSQTSVYICACGYST
>V162RF-JABR01088215.1-trbv |(106852, 107152)|2.84723918747|(0.941,0.923,0.997)|-1
HTGAGVSQSPRYKVSKRGQEVALRCDPISGHAALYWYQQALGQGPELLTYFNYEAQQDKS
GLLSDRFSAERPEGSVSTLTIERTEQGDSAVYLCASSL
>V163RF-JABR01088215.1-trbv |(114804, 115100)|2.13667331072|(0.691,0.823,0.690)|-1
PVDTEVTQSPTHLIKTRGQQVTLRCSPISGHSSVYWHQQTLGQGPQLIFEYDRKEERGRG
NFPDRFSGRQFPNYSSELNVNASEMGDSALYLCASSL
>V164RF-JABR01088216.1-trbv |(3479, 3776)|2.9636404731|(0.997,0.985,0.983)|-1
PANAGVTQSPKFQILKTGQSMTLQCAQDMNHNSMYWYRQDPGMGLRLIHYSVAENTTDTG
EVPDGYSVSRLKKKDFLLRLESAAPSQTSVYFCASSE
>V165RF-JABR01088216.1-trbv |(16712, 17025)|2.47338610073|(0.967,0.801,0.857)|-1
PLDTAVSQTLKYLVTQTGEKESLKCEQNLGHNAMYWYKQDSKKLLQIMFIYNNQEPILNE
TVPDRFSPKSPDKAHLILHIKSVELGDSAVYFCASSQDTALQ
>V166RF-JABR01088216.1-trbv |(20140, 20437)|2.11898343334|(0.834,0.644,0.785)|-1
PMETGVMQTPRHLVMGMTNKKPLKCEQHLGHNAMYWYKQKAKKPLELMFVYNFKERAENN
SVPSRFVPECPDSSHLYLHVRALQPEDSALYFCASSQ
>V167RF-JABR01088216.1-trav |(30363, 30669)|1.69940405446|(0.607,0.502,0.861)|-1
QSMTLQCAQDMNHERMYWYRQDPGMGLRLIHYSVAENTTDKGEVPDGYSVSRLNKKDFLL
RLESAAPSQTSVYFCASSEATVLHGRLLSAHKGRRGSALI
>V168RF-JABR01088216.1-trbv |(32988, 33285)|2.99396800026|(0.998,1.000,0.996)|-1
PVNAGVTQTPKFQILKTGQSMTLQCAQDMNHNYMYWYRQDPGMGLRLIHYSVGKGSTDTG
EVPDGYSVSRSNLQNFMLRLESAAPSQTSVYFCASSE
>V169RF-JABR01088216.1-trbv |(36726, 37026)|2.14331459781|(0.974,0.994,0.602)|-1
HTGAGVSQSPRNKVTEEGKDVVLRCDPISGHTALYWYRQSLGKGLEFLIYFQGKDAPDKS
GLPSGRFSVERPEGSVSTLKIQPTQQGDSAVYLCASSL
>V170RF-JABR01092598.1-ighv |(8862, 9169)|2.70213887277|(0.965,0.867,0.917)|-1
AHSEVQLVQSGAEVRKPGATVKISCKASGYTFTGYYLHWVRQAPGKGLEWMGLVDPEDGE
ANYAQKFQGRVTMTADTSTDTAYMELSSLRSEDTAVYYCA
>V171RF-JABR01098590.1-trav |(5160, 5460)|2.93418588966|(0.996,0.973,0.970)|-1
FSMAQTVTQSQPEMSVQEAETVTLSCTYDTSDSDYYLFWYKQPPSRQMILIIRQEAYKQQ
NATENRFSVNFQKAAKSFSLKISDSQLGDAAGYFCAYR
>V172RF-JABR01098592.1-trdv |(18652, 18953)|2.76834005623|(0.978,0.977,0.864)|-1
SSMAQTVTQSQPEMSVQEAETVTLNCTYDTSESNYYLFWYKQPPSRQMILIIRQEAYKQQ
NAKENRFSVNFQKAAKSFSLKISDSQLGDAAMYFCAFM
>V173RF-JABR01098593.1-trav |(12562, 12849)|2.03397239012|(0.652,0.696,0.877)|-1
VSSQELEQSPQSLIIQEGKNLTINCTSSKTLYSLHWYKQKYGEGLIFLMMLQKGGEEKSH
EKITAKLDEKKQQSFLHITASQPSHAGIYLCGGD
>V174RF-JABR01098593.1-trav |(29181, 29471)|2.56924817672|(0.853,0.818,0.922)|-1
VSSEDKVVQNPLSLVVHEGDTVTLNCSYEVINFRSLLWYKQEKKAPTFLFMLTSSGFDKK
KGRLSGILDKKELFSILNITATQTRDSAIYLCAVE
>V175RF-JABR01098595.1-trav |(1678, 1977)|2.34959704534|(0.961,0.972,0.683)|-1
VNGQQIMQIPQYQHVQEGEDFTTYCNSSTTLNNIQWYKQRPGGHPVFLIVLVKSGEVKKQ
KRLTFQFGEAKKNSSLHITATQTTDVGTYFCAGHSAPQ
>V176RF-JABR01098595.1-trav |(12709, 12999)|2.2682260856|(0.929,0.676,0.894)|-1
TIIDAKTTQPTSMDCAEGRGANLPCNHSTISGNEYIYWYRQIHSQGPQYVIHGLKNNETN
AMASLIITEDRKSSTLILPHATLRDTAVYYCIVRV
>V177RF-JABR01098595.1-trav |(53343, 53631)|1.71255178969|(0.592,0.512,0.645)|-1
KQNPPSLSVQEGGISILNCDYTNSMFDYFLWYKKYPAEGPTSLISISSIKDKKEEGRFTV
FLNKSAKHLSLHIGASQPGDSAMYLCAASAQCSP
>V178RF-JABR01098595.1-trav |(58455, 58742)|2.15683813726|(0.770,0.668,0.760)|-1
VRSQKPVQGPQAVILQEGEDAIINCNSSKALYSVHWYRQKHGEVPVFLMILLKGGEQKSH
DKIVATFNEKKHQSSLYLMASQLSYSGTYFCGAE
>V179RF-JABR01098596.1-trav |(10048, 10351)|1.77432407454|(0.669,0.510,0.694)|-1
IQVEQSPPDLILQEGANSTLRCNYSATVSNLQWFHQNPWGQLINLFYIPSGTKQNGRLSA
TTVTSERYSLLHISSSQTTDSGIYFCAVEPQYSPGTCSL
>V180RF-JABR01098596.1-trav |(31032, 31347)|1.62969299118|(0.812,0.612,0.567)|-1
GVSGQQKEKSDRQQVKQSPQSLIVQKGEISIINCAYENSAFDYFPWYRQFPGKGPALLIA
IRSAMSEKEEGRFKIFFNKSAKNFSLHIMDSQPGDSATYFCAA
>V181RF-JABR01098596.1-trav |(39751, 40051)|1.95173132602|(0.810,0.575,0.771)|-1
FSVAQKVTQAQSSVSMPVGKAVTLNCQYETSSWSYHIFWYKQLPGKEMIFLIRQGSSEQN
AKNGRYSVNFEKAASSITLTISALQLEDSATYFCALWE
>V182RF-JABR01098597.1-trav |(9844, 10131)|2.3287931996|(0.909,0.703,0.877)|-1
LSGEDQVTQSPEALRLQEGQSSSLNCSYTASNLRGLLWYRQDPGKGPEFLFILYSAGEEK
EKERLKATLTKKESFLHITGPKPEDSATYLCAVQ
>V183RF-JABR01098597.1-trav |(21891, 22182)|2.29937800526|(0.894,0.656,0.984)|-1
VSSKQEVTQIPAALSVPEGDNLVLNCSFTDSAIYNLQWFRQDPGKGLTSLLLIQSSQREQ
TSGRLNASLDKSSRHSTLYITASEPGDSATYLCAV
>V184RF-JABR01098598.1-trav |(19033, 19320)|2.97170402421|(0.990,0.985,0.997)|-1
VNSQQGEEDPQALSIQEGENATMNCSYKTSIDNLQWYRQDSGRSLVRLILIRSNEREKSS
GRLRVTLDTSKKSSSLLITASRAADTASYFCATD
>V185RF-JABR01098598.1-trav |(25184, 25475)|2.9410935653|(0.986,0.992,0.965)|-1
RTNGDSVTQTEGPVTLPERAALTLNCTYQTSYSAFMFWYVQYLNKEPELLLKSSENQETD
SRGFQASHVKSDSSFHLEKLSVQLSDSAVYYCVLR
>V186RF-JABR01098598.1-trav |(28683, 28986)|2.77047195752|(0.949,0.907,0.924)|-1
SSMAQKVTQAQTEISVVEKEDVNLDCVYETRDSTYYLFWYKQPPSGELIFLIRQNSFNEQ
NEINGRYSSNFQKSTSSFNLTITASQVVDSAVYFCALNE
>V187RF-JABR01098599.1-trav |(7776, 8069)|2.97864005313|(0.995,0.986,0.998)|-1
VWSQQKEVEQNPGPLSVPEGATASLNCTYSNSAFQYFMWYKQYSRKGPQLLIYTYSSGDK
EDGRFTAQVDKSSKYISLFIRDSQPSDSATYFCAMS
>V188RF-JABR01098599.1-trav |(19604, 19904)|1.67278939016|(0.885,0.736,0.531)|-1
GTRAQSVTQLDRQVPVFEEAPVLLRCNYSSSSVSVYLFWYVQYPNQGLQLLLKYLSGPTL
VKGINGFEAEFKKSETSFHLRKPSAHISDTAEYFCAVS
>V189RF-JABR01098600.1-trav |(14202, 14490)|2.92580593785|(0.960,0.976,0.996)|-1
VWSQQKVEQNSGSLSVPEGAIASLNCTYSDRGSQSFLWYRQYSGQSPELLISTYSSGDKE
DGRFTAQLNKASQYVSLLIRDSQLSDSATYLCVV
>V190RF-JABR01098600.1-trav |(20988, 21285)|2.63391777149|(0.990,0.830,0.927)|-1
GTRAQSVTQLDSQVSVSEGVPVLLRCNYSSSFSPSLFWYVQYPNQGLQLLLKYISGTALV
KGINGFEAEFKKSETTFHLTKASAHVSDAAEYFCAVS
>V191RF-JABR01098600.1-trav |(26541, 26838)|2.97536527997|(1.000,0.997,0.980)|-1
TARAQSVTQPDIHITVSEGASLELRCNYSYGATPSLFWYVQSPGQGLQLLLKYFSGDTLV
QGIKGFEAEFKRSQYSFNLRKPSVHWSDAAEYFCAAG
>V192RF-JABR01098600.1-trav |(40729, 41022)|2.91269832585|(0.995,0.959,0.967)|-1
VSRGESVGLHLPTVSVQEGDNSVINCTYSDSVSDYFLWYKQESGKGPQFIIDIRSNMAKR
QGQRLTVLLNKTVKHLSLQIAATEPGDSAVYFCAEN
>V193RF-JABR01098600.1-trav |(52617, 52918)|2.75126597494|(0.948,0.861,0.975)|-1
SGIAQKITQTQPAMFMQEKEAVTLDCTYDTSDQNYGLFWYKQPSSGEMIFLIHQESYDKQ
NATEGRYSLNFQKARKSINLIISASQVGDSAMYFCAMR
>V194RF-JABR01098600.1-trav |(72791, 73095)|2.6682425482|(0.962,0.854,0.909)|-1
TQMQGPVTLSERAFLTINCTYTATGYPSLFWYVQYPGEGPQLLLKAAKDDDKGSNKDFEA
TYRKETTSFHLEKDSVQESDSAVYFCALSDTVTGTARGV
>V195RF-JABR01098601.1-trav |(15930, 16220)|2.98286400565|(0.997,0.992,0.994)|-1
VNGENVEQHPSILSVQEGDSSVIKCTYSDSASNYFPWYKQELGKGPQLIIDIRSNVHEKK
DQRITVLLNKTAKHFSLHITETQPGDSAVYFCAAS
>V196RF-JABR01098603.1-trav |(9193, 9499)|2.98061205453|(0.998,0.994,0.989)|-1
VWSQQKEVEQDPGPFSVPEGATVTFNCTYSNSASQSFFWYRQDSRKEPKLLMSVYSSGNE
DGRFTAQLNRASQYISLLIRDSQLSDSATYLCAVRTQCSP
>V197RF-JABR01098603.1-trav |(14624, 14921)|2.08424236504|(0.980,0.693,0.806)|-1
GTRAQSVTQLDSQVSVSEGVPVLLRCNYSSPVSPNLFWYVQYPNQGLQLLLKYTSGTTLV
KGINGFKAEFKKSETSFHLTKASAHVSDAAEYFCAVS
>V198RF-JABR01098604.1-trav |(11404, 11694)|2.99593600205|(1.000,1.000,0.996)|-1
MSRGEDVEQSLFLSVREGDISVINCTYTDSSSTYLYWYKQEPGAGLQLLTYILSNTDLKQ
DQRLTVLLNKKDKHLSLRIADTQTGDSAIYFCAES
>V199RF-JABR01098604.1-trav |(25125, 25413)|1.99243088106|(0.951,0.870,0.595)|-1
VKNQKIEQNSEALNIQEGKTATLTCNYTNYSPSYLQWYRQDPGRGPVFLLLIRENEKEKW
KERLKVTFDTTLKQSLFHITASQPADSATYLCAL
>V200RF-JABR01098604.1-trav |(37115, 37402)|2.87236078502|(0.956,0.945,0.973)|-1
ANGENQVEQSPRFLGPQQGDVAFMSCMYSVSRFNNLQWYRQNTGTGPKHLFSMYSAGYEK
QKGRLNATLLKNGSSLYITAMQPEDSATYFCAVD
>V201RF-JABR01098604.1-trav |(64438, 64732)|2.98080001|(0.997,0.992,0.992)|-1
EINGDSVVQTEGQVLLSEGDSLIVNCSYESTQYPSLFWYVQYPGEGPQLLLKAMMANDKE
SNKGFEATYHKETTSFHLKKDSVQESDSAVYFCALS
>V202RF-JABR01098604.1-trav |(77658, 77951)|2.94571942965|(0.970,0.995,0.984)|-1
GSGKNQVEQSPQSLIILEGKNCTLQCNYTVSPFNNLRWYKQDTGKGPISLTIMTFSENTK
LNGRYTATLDADTKQSSLHITATQLSDSASYICVVS
>V203RF-JABR01098606.1-trav |(22478, 22773)|2.32876466642|(0.931,0.763,0.804)|-1
DQVTVAEGNPLTVKCTYSVSGNPYLFWYVQYPKQGLQFLLKYITGDNLVKGSYGFEAEFN
KSQTSFHLKKPSALVSDSALYFCAVRDTLIGAAGGA
>V204RF-JABR01098609.1-trav |(14815, 15124)|1.95854050843|(0.859,0.808,0.576)|-1
TIMYLVIGTAGQSLEQPSEVTAVEGAIVQINCSYQTSRFDGLSWYQQHDGGAPTFLSYNA
LDGLEERGHFSSFLSRSDSYGYLLLQELQMKDSASYFCAVR
>V205RF-JABR01098609.1-trav |(38904, 39196)|1.94611597691|(0.741,0.554,0.792)|-1
MAGAIVQINCTYQTSGFNGLSWYQQHDGEAPTLLFYNVLDGLEEKGRFSSFLSNSKGYSY
LLLKELQMKDSASYLCAVRDTVTMRSLQLQQNSKG
>V206RF-JABR01184607.1-trbv |(64, 364)|2.9471290053|(0.985,0.997,0.967)|-1
HTGAGVSQSPRNKVTEKGKDVALRCDPISGHTVLYWYRQNLGQGLEFLIYFRGTGAVDDS
GLRSDQFSATRPEGSDSTLKIQCTEQRDSAMYFCASSL
>V207RF-JABR01190886.1-ighv |(459, 765)|2.92242463332|(0.974,0.989,0.961)|-1
CAEVQLVQSGAEVKRPGESLKISCKTSGYSFTSYWISWVRQMPGKGLEWMGMIYLGDSDT
RYSPSFQGQVTISADKSISTTYLQWSSLKASDTATYYCAK
>V0RF-JZKE01005121.1-trbv |(3942, 4254)|2.86465640993|(0.943,0.951,0.975)|1
LVETKVTQTPRHLVKRTGEKVLLKCSQDMDHERMFWYRQDPGLGLRLIYFSYDVDNDEKG
DVSEGYSASRKKKEYFPLVLESASTNQTSVYLCASRYPQRCT
>V1RF-JZKE01068552.1-trbv |(289, 585)|2.00594423414|(0.961,0.899,0.588)|1
SMNAGVTQTPRFQILETGQNMTLRCVQDMNHNNMYWYRQDPGLGLRLIHYSVGAGTTANG
EVPEGYSVSRSSTKNFPLTLGSATPSQTSVYFCASSD
>V2RF-JZKE01073331.1-trdv |(5473, 5772)|1.81613678897|(0.810,0.701,0.565)|1
SIVAQKVTQAQTARSTTVGQTVTLNCQYETSRIYYTINWYKQLPSKEMIFLLRQGSNSQN
AKDGRYSVNFRKEAKSIDLTISDLRLEDLAKYFCALCE
>V3RF-JZKE01214711.1-trdv |(1444, 1730)|1.61258623631|(0.498,0.606,0.582)|1
RMMSITKKTGSYIIITCDIQQSTSQYIHWYLFQEGRTPQRILYYDLVSSKTVLESGFSLE
KYHAYASRGKSSRFILQNLEESDSGVYYCATWS
>V4RF-JZKE01218258.1-igkv |(171021, 171321)|2.98632422844|(1.000,1.000,0.987)|1
ARCDIQMTQSPSSLAASLGDTVTITCQASQGISNYLSWYQQKPGQSPKILIYGASNLETG
VPSRFSGSGSGTDFTLTISSLQPEDFATYYCLQSYNYP
>V5RF-JZKE01218259.1-igkv |(864, 1179)|2.45624719745|(0.986,0.729,0.974)|1
SSGEIVMTQTPLSLPVTLGEPASISCRSSQSLLHSNGNTYLSWYLQKPGQSPQLLIYLGF
TRASGVPDRFSGSGSGTDFTLKISKVEAEDVGVYYCMQTIQVP
>V6RF-JZKE01218259.1-igkv |(11427, 11740)|2.60310027078|(0.901,0.796,0.966)|1
SSGDIVMTQTPLSLSVTPGESASISCTASQNIQNTKGNTYLNWFLQKPGQPPKRLIYKIS
NRDSGVSDRFSGSGSGTDFTLEISRVEAEDVGVYYCMQASYY
>V7RF-JZKE01218269.1-igkv |(713, 1028)|2.1413685352|(0.976,0.605,0.984)|1
SSGEIVMTQTPLSLPVTPGEPASISCSSSQSLLHSNGNTYLYWYLQKPGQSPQLLIYRVS
NRLSGVPDRFSGSGSGTDFTLKISRVEAEDVGVYYCMQALQFP
>V8RF-JZKE01218271.1-igkv |(2296, 2608)|1.84361020233|(0.985,0.551,0.880)|1
ACGDIVMTQSPGSLAASPGERVTINCKSSQSLLYNNNNYLAWYQQKPGQAPKVLISWAST
RASGVPDRFSGSGSGTDFTLTISSLQAEDVAVYYCAQYYNYP
>V9RF-JZKE01244686.1-ighv |(3631, 3937)|2.98880001|(0.993,0.998,0.998)|1
VQCEVQLVESGGGLVQPGGSLTLSCVASGFTFSSYAMCWVRQAPGKGLEWVSAIGSGGGT
YYADAVKGQFTISRDNSKNTLSLQMKSLQAEDTAMYYCAR
>V10RF-JZKE01244690.1-ighv |(27, 336)|2.80681224378|(0.968,0.959,0.899)|1
VQCEVQLVESGGGLVQPGGSLRLSCAASGFTFDDYAMHWVRQAPGKGLDWVSVINWNGDY
INYADAVKGRFTISRDNSKNSLYLQMNSLRAEDTAVYYCAR
>V11RF-JZKE01244709.1-ighv |(12, 321)|2.9858400105|(0.994,1.000,0.992)|1
VQCEVQLVESGGGLVQPGGSLRLSCAVSGFTVSNYYMSWVRQAPGKGLEWVSYIYSDDGD
TNYADAVKGRFTTSTDNGKNMLYLQMNSLRTEDTAVYYCAR
>V12RF-JZKE01244710.1-ighv |(1079, 1388)|3.0|(1.000,1.000,1.000)|1
AQCEVQLVESGGGLVQPGGSLTLSCAASGFTFSDYYMSWVRQAPGKGLEWVSRISNTGGS
TWYADAVKGRFTISRDNSKNTLSLQMNSLRAEDTAVYYCAR
>V13RF-JZKE01244715.1-ighv |(308, 614)|2.99293600205|(0.999,0.995,0.999)|1
VRCEVQLVESGGGLVQPGGSLTLSCAASGFTFSSYAMHWVRQAPGKGLEWVSRINSGGST
SYADAVKGRFTISRDNSKNMLSLQMNSLRSEDTAVYYCTR
>V14RF-JZKE01247537.1-trbv |(10488, 10784)|1.67845042241|(0.872,0.721,0.536)|1
SVNAGITQTPRFQILETGQNMTLRCVQDMNHNNIYWYRQDPGLGLRLIHYSVGAGTTTNG
EVPEGYSVSRSSTKNFPLTLGSATPSQTSVYFCASSD
>V15RF-JZKE01249931.1-iglv |(1312, 1618)|1.87119073438|(0.876,0.681,0.646)|1
SWVQSGLTQEASVSGSVGQKVTLSCMGNSNNVGTYGVGWYQQISRGAPKTVMIGNSRPSG
IPNRFSGSRSGNTASLTISGLQPEDEADYYCSAWDDSLTA
>V16RF-JZKE01249931.1-iglv |(10411, 10721)|2.1995153795|(0.900,0.880,0.647)|1
SLSQPVLTQPPSLSASPGASARLTCTLSSGTVVGGYHISWYQQKPGSRPRYLLRYHSDSN
KHQGSGIPSRFSGSKDASANAGILHISGLQPNDEADYYCLT
>V17RF-JZKE01249932.1-iglv |(5041, 5344)|2.12047338936|(0.669,0.745,0.767)|1
SLSQPVLTQPPSASASLGASAKLTCTLSSAHSGYTIAWYQQQPGKAPQYLMYVKSDGRHS
KGDGIPDHFSGSSSGADRYLTISNIQPEDEADYICGADY
>V18RF-JZKE01249932.1-iglv |(7450, 7753)|2.12047338936|(0.669,0.745,0.767)|1
SLSQPVLTQPPSASASLGASAKLTCTLSSAHSGYTIAWYQQQPGKAPQYLMYVKSDGRHS
KGDGIPDHFSGSSSGADRYLTISNIQPEDEADYICGADY
>V19RF-JZKE01249933.1-iglv |(3726, 4036)|2.77453758905|(0.988,0.935,0.896)|1
SLSQPVLTQPPSLSASPGASARLTCTLSSGFSVGSYAIYWYQQKPGSPPRYLLSYYSDSD
KHQGSGVPRRFSGSKDASANVGILHISGLQPEDEADYYCMV
>V20RF-JZKE01249942.1-igkv |(820, 1133)|1.90078096988|(0.607,0.672,0.644)|1
SLSQPVLTQPPSASASPGASAKLTCTLSSAHSSYTIAWHQQQPGKAPRYLMWVNSAGSHS
KGDGIPDRFSGSSSGADRYLTISNIQPEDEADYYCQTWDSGI
>V21RF-JZKE01249944.1-iglv |(1831, 2141)|2.98521630725|(1.000,0.986,1.000)|1
SLANVVLTQPSSVSGSPGQKVTISCTRSSGNIGDNYVHWYQQRPGSAPTTVIYADDKRPS
GVPDRFSGSIDSSSNSASLTISGLQSEDEADYYCQSYGSSA
>V22RF-JZKE01249954.1-iglv |(2355, 2642)|2.09699668685|(0.768,0.604,0.861)|1
PAVSVALGQTARISCQGDDHISNFVPTNWYQQKPGQAPVLVIYGNSNRPSGIPERFSGSK
SGTTATLTISGAQAGDEADYYCQSLDMSGNNHTV
>V23RF-JZKE01249955.1-iglv |(302, 610)|1.99994824876|(0.928,0.559,0.933)|1
SVASQLTQVPAASVALGQTARITCQEDGIRRFFTNWYQQKPGETPVLLIYDSSKQPSGIP
ERFSGSKSGTTATLTISGAQAGDEADYYCQSFDISSNYLTA
>V24RF-JZKE01249956.1-igkv |(39, 357)|2.49206563012|(0.874,0.860,0.788)|1
SPFLSSLAGSMASQLTQEPSVSVALGQTARMTCQGDSLRSYYASWYQQKPGQAPVLVIYS
NSNRPSGIPERFSGSKSGTTATLTISGAQAEDEADYYCGSYTGS
>V25RF-JZKE01249956.1-iglv |(5127, 5437)|2.58895425357|(0.823,0.991,0.915)|1
SGAQSALTQPSSVSGNPGQSVTISCAGTSSDVGKYNYVSWYQQHPGTAPKLLIYNVNTRT
SGIPDRFSGSKSGNTASLTISGLLAEDEADYHCSSYRSGNA
>V26RF-JZKE01249957.1-iglv |(3969, 4267)|2.94606016446|(0.998,0.973,0.979)|1
SVASQLTQVPAVSVALGQTARITCQGDSLSSYYPNWYQQKPGQAPVLVIYGNSNRPSGIP
ERFSSSDSGTTATLTISGAQAGDEADYYCGSYAGSDT
>V27RF-JZKE01249957.1-iglv |(9221, 9531)|2.57311239305|(0.819,0.993,0.903)|1
SGAQSALTQPSSVSGNPGQSVTISCAGTSSDIGKYNYVSWYQQHPGTAPKLLIYNVNTRA
SGIPDRFSGSKSGNTASLTISGLLAEDEADYHCSSYRSGNA
>V28RF-JZKE01249957.1-igkv |(15254, 15557)|2.10299459194|(0.706,0.776,0.652)|1
FVASDELTQPHSVSVSPGQTAKITCSGDSLAKKYASWLQQKPGQSPVLVIYKDSERPSGI
PERFSGSSSGTTVTLTITGAQVEDEADYYCQSRDSSGTH
>V29RF-JZKE01249958.1-iglv |(6051, 6351)|2.26938845064|(0.934,0.657,0.943)|1
SVASQLTQVPAASVALGQTARITCQEDGIRSFFTNWYQQKPGEAPVLLIYDSSKQPSGIP
ERFSGSKSGTTATLTISGAQAGDEADYYCQSFDISSNY
>V30RF-JZKE01249959.1-iglv |(447, 745)|2.91611408413|(0.973,0.954,0.992)|1
SVASYELTQPPSVSVSPGQTARITCGGNNIGNKYAYWHQQKAGQAPVLIIYSDSNRPSGI
PERFSGSNSGNTATLTISGTQAGDEADYYCQVWDGSN
>V31RF-JZKE01255160.1-ighv |(7108, 7423)|2.99392000218|(0.996,1.000,0.998)|1
VQCEVQLVESGGGLVQPGGSLTLSCAASGFSFSNYWMHWVRQAPGKGLEWVSSIGNDGST
SYADAVKGRFTISRDNDKNTLSLRMNSLRAEDTAVYYCARETV
>V32RF-JZKE01296733.1-igkv |(5866, 6179)|2.92028822908|(0.979,0.976,0.966)|1
SSGDIVMTQTPLSLSVTPGESASISCTASQSILHTDGNTYLNWLLQKPGQPPKRLIYKIS
NRDSGVSDRFSGSGSGTDFTLEISRVEAEDVGVYYCMQASYY
>V33RF-JZKE01097728.1-igkv |(2698, 3010)|2.91042597125|(0.989,0.940,0.991)|-1
ACGDIVMTQSLRSLAVSPGERVTIDCKSSQSLLSNNKNYLAWHQQKPGQAPKLLIYWAST
RASGVPDRFSGSGSGTDFTLTISSVQAEDVAVYYCQQYHSTP
>V34RF-JZKE01143868.1-trav |(10624, 10917)|1.51062895684|(0.480,0.514,0.532)|-1
SNEQPQVEQSPPSLKVKEGDSFTLNCSYRDSASDFFQWFRQDPEESLISLIQMRSNVKEK
ISGRFTARFNKGDQHFSLHIRDSQLHDSTVFFCAAS
>V35RF-JZKE01143868.1-trav |(15192, 15493)|2.8790773318|(0.970,0.950,0.961)|-1
SSVAQTVTQSQPEMSVQEAGTVTLDCTYATSDSNYYLFWYKQPPSRQMILIIRQEAYKQQ
NATENRFSVNFQKAAKSFSLEISDSQLEDAAMYFCAFM
>V36RF-JZKE01143868.1-trdv |(22921, 23213)|1.69378624215|(0.556,0.579,0.561)|-1
LSLLFPTGSSVAQTVTQSQPKKSVWQGEAVTLHCTYATSRYYYYLYWYKQTPSGHMILII
SQGSNNQQAARRNRFSVDFWKATKSFSLKISDARL
>V37RF-JZKE01143869.1-trav |(6274, 6564)|2.90623355494|(0.962,0.983,0.963)|-1
VSSEDKVIQSPSSLAVHEGDSATLTCNYEVSYFQSLQWYKQEKNAPTFLFTLTSSGIEKK
SGRLSSILDNKELLSTLNITATQTRDSAIYFCAVE
>V38RF-JZKE01143870.1-trav |(3358, 3682)|1.75815771981|(0.597,0.580,0.915)|-1
VNSQQKDNDQEVKQNSPSLSVQEGGISVLNCDYTNNMFDYFLWFKQYPAKGPALLISTSS
VVDKKVDGRFTVFSNRSAKHLSLHIAASQPGDSALYLCAASAQCSP
>V39RF-JZKE01143870.1-trav |(12640, 12943)|1.9169994907|(0.618,0.835,0.887)|-1
SSMSQQVIQSQSAISKQEGETVKLECSYNTSVPYHILYWYKRPPSGEIIFLIFQHTDTDT
NATQGQYSVSFQKAAKTIRLIISPSQLEDSATYFCCLRE
>V40RF-JZKE01143870.1-trav |(25555, 25844)|1.50740122698|(0.524,0.719,0.436)|-1
IMGDAKTTQPNSMESTEEEPVYLPCNHSTISGSEYVYWYRQILLQGPEYVIHGLKSNVTN
SMATLAISADRKSSTLILPRVTLGDTAVYYCIVR
>V41RF-JZKE01143870.1-trdv |(43747, 44046)|1.81613678897|(0.810,0.701,0.565)|-1
SIVAQKVTQAQTARSTTVGQTVTLNCQYETSRIYYTINWYKQLPSKEMIFLLRQGSNSQN
AKDGRYSVNFRKEAKSIDLTISDLRLEDLAKYFCALCE
>V42RF-JZKE01143871.1-trav |(16684, 16984)|2.17759122379|(0.850,0.772,0.684)|-1
RTGAQSVAQPDVHVTVSEGDPLKLRCTYSGGVVTSYLFWYIRYPGQSLQFLLKYTSGDTL
VKGMKGFEAELRKNESSFHLKKHSARLSDSAQYFCAVS
>V43RF-JZKE01143872.1-trdv |(10578, 10878)|1.89728708225|(0.784,0.601,0.680)|-1
STVAQKVTQAQTARSMTVGRTVSLNCRYETSWNYYYIFWYKQLPSKEMIFLLYQYSGNQN
AKDGRYSVNFRKEVKSIDLTISALRLEDSAKYYCALAE
>V44RF-JZKE01143872.1-trav |(21701, 22001)|2.13861187749|(0.841,0.674,0.757)|-1
LNGQEVKQIPQFLHIQEGEDFSTYCNSTSTLNTVQWYKQRPGGSPVLLMILVKSGEVKKE
KRLTAQFGETRKDSSLHITAAQTADVGTYFCAVAQCSP
>V45RF-JZKE01143873.1-trdv |(6157, 6456)|2.81228190752|(0.925,0.969,0.926)|-1
STVAQKVTQYQATTSMTEGQAVTLNCQYETSSTTYFICWYKQLPSKEMIFLLRQGSTSQN
AKDGRYSVNFRKEAKSINLTISALRLEDSAKYFCALWD
>V46RF-JZKE01143873.1-trdv |(14264, 14561)|2.07884019061|(0.749,0.679,0.686)|-1
SVAQKVTQSQSARSTTEGRAVTLNCRYETSWSYYYIFWYKQLPSKEMIFLLRQDSDGGNA
NNGRYSVSFRKEVKSIDLTISALRLEDSAKYYCALAE
>V47RF-JZKE01143874.1-trdv |(2471, 2770)|2.7393256383|(0.930,0.951,0.873)|-1
STVAQKVTQAQTATTRTVGQAVTLNCQYEASWSSYYIYWYKQLPSNEMIFLLRQYSGDQN
AKNGRYSINFQKEAKSIDLTISALRLEDSAKYFCALWD
>V48RF-JZKE01143889.1-trdv |(1124, 1427)|1.89139875911|(0.754,0.709,0.567)|-1
SSISQKVTQAHAAISMLERKAVTLDCVYEAIAFSYYLFWYKQPPNGEMILLIDQESFNEQ
NATKGRYCLNFQKSAGSISLTITALRLGDSAMYFCALRE
>V49RF-JZKE01143890.1-trav |(1103, 1400)|2.97167205249|(0.988,0.997,0.987)|-1
RSNGDSVTQTEGTVTLPEGAPVILNCTYETTYSVSYLFWYVQYLNQSPQLLLKSSTENQR
GENRGFQANLVKSDKSFHLEKSSLRMSDSAVYYCALS
>V50RF-JZKE01143891.1-trav |(1676, 1998)|2.81772989931|(0.942,0.969,0.913)|-1
TNGDSVTQTEGPVTLPEGEALTLNCTYQSSYAAFLFWYVQFQNKEPVLLLKSSSETQEMD
SRGFQANNVKSDSSFHLKKPSVQLSDSAVYYCAMRDTARGTAGGA
>V51RF-JZKE01143891.1-trav |(8677, 8980)|2.92950687711|(0.963,0.978,0.993)|-1
PSMAQKVTQAQPEISVVEKESVTLDCVYETRDPTYYLFWYKQPPSGEMIFLIRQDSFNEK
NETKDRYFLNLQKSTSSISLTITASQLMDSAVYFCALRE
>V52RF-JZKE01143893.1-trav |(6613, 6900)|2.87529565252|(0.951,0.977,0.950)|-1
VNSQQGEENPQALSIQEGENATINCSYKSSISNLQWYRQDSGRGLTLLILIRANKREEHH
GRLTVTLNTSIKSSSLIITASCAADSATYFCATD
>V53RF-JZKE01143895.1-trav |(12286, 12579)|2.6372974615|(0.936,0.795,0.998)|-1
VSGGENVGLHPPTLNVQEGDTSVINCTYSNSASNYFPWYKQELGKGPQFIIDIRSNMDNK
QEQRFTVLLNKTAKHLSLHIAGTQAGDSAVYFCAES
>V54RF-JZKE01143895.1-trav |(15624, 15933)|2.96508440501|(0.993,0.978,0.995)|-1
AGIAQKVTQSQPAMSVQEKEAVTLDCTYDTSTSVTSYTLFWYKQPSSGEMILLIRQDSYN
QQNATEGRYSLNFQKASKSIKLVISASQVGDSAIYFCALSE
>V55RF-JZKE01143895.1-trav |(22481, 22772)|2.96576801985|(0.990,0.993,0.983)|-1
VRSQQKEVEQTPESLSVSEGATASLNCTYSNTASQYFTWYRQYSGKGPELLVSIYSNGDK
EEERFTVHLNMASRYVSLLIRDSQPSDSATYLCAV
>V56RF-JZKE01143895.1-trav |(26982, 27279)|2.06490529615|(0.841,0.619,0.793)|-1
GTGAQTVTQPDLHVTVTEGASLELRCNYSVSFTPSLWWYVQYPNQGLQLLLKYVSGSTLV
KGIQGFEAEFRKNESSFHLRKTFAHLSDSAQYFCAVS
>V57RF-JZKE01143896.1-trav |(1244, 1537)|2.9032417319|(0.956,0.966,0.985)|-1
VRGGENMGLHPPNLSVQEGDTSVINCTYSNSNSDYFCWYKQEPGKGPQFIMDIRSNKDKK
QEGRFTILLNKMAKHLSLHIAGTQAGDSAAYLCAES
>V58RF-JZKE01143896.1-trav |(8327, 8630)|2.95010320239|(0.996,0.971,0.986)|-1
SGIAQKVTQVQPAMLVQEKEAVTLDCTYDTSDSRYTLFWYKQPSSGEMLLLIRQDSYNQQ
NATEGRYSLNFQKANKSIKLVISASQVGDSAIYFCALME
>V59RF-JZKE01143896.1-trav |(15626, 15938)|2.90973070067|(0.977,0.990,0.947)|-1
VRSQQKEVEQTPESLSVSEGATASLNCTYSNTASQYFAWYRQYSGKGPELPVSIYSTGDK
EEEGRFTVQLNKGSRYVSLLIRDSQPSDSATYLCAVSTQCSP
>V60RF-JZKE01143902.1-trav |(453, 744)|2.97250008499|(0.996,0.986,0.991)|-1
VRSQQKEVEQTPESLSVSEGATASLNCTYSNTASQYFAWYRQYSGKGPELLVFIYSTGDK
EEGRFTVQLNKASRYVSLLIRDSQPSDSATYLCAV
>V61RF-JZKE01143903.1-trav |(641, 935)|2.95570083945|(0.980,0.998,0.979)|-1
RTHGDSVTQMEGQVTLSEEAFLTINCTYTATGYPALFWYVQYPGEGPQLLLKATKANDKG
INKGFEATYKRETTSFHLEKASVHESDSAVYYCALS
>V62RF-JZKE01143910.1-trav |(6899, 7192)|2.80023317448|(0.933,0.897,0.987)|-1
VSGKNQVEQGPQSLIIPEGENCTLQCNYTVSPFNNLRWYKQETGRGPVSLIIMNYSKSKE
SNGRYTATLDASAKQSSLHITASQLSDSASYICVAS
>V63RF-JZKE01143910.1-trav |(27248, 27545)|1.93886437096|(0.696,0.561,0.780)|-1
GTGAQTVTQPDLHVTVTQGAFLELRCNYSVSFTPFLWWYVQYPNQGLQLLLKYVSGNTLV
KGIQGFEAEFRKNESSFHLRKTFAHLSDSAQYFCAVS
>V64RF-JZKE01143910.1-trav |(50038, 50331)|2.54800208393|(0.949,0.753,0.998)|-1
VSGGENVGLHPPTLNVQEGDTSVINCTYSDSASIYFPWYKQELGKGPQFITDIRSNMDNK
QEQRFTVLLNKTAKHLSLHIAGTQAGDSAVYFCAES
>V65RF-JZKE01143910.1-trav |(57835, 58138)|2.95677645736|(0.988,0.973,0.997)|-1
AGVAQKVTQSQPAMLVQEKEAVTLDCTYDTSDSSYGLFWYKQPSSGEMLLLIRQDSYNQQ
NATEGRYSLNFQKARKSIHLVISALQLGDSAIYFCALSE
>V66RF-JZKE01143913.1-trav |(1727, 2016)|2.58879518964|(0.820,0.952,0.941)|-1
QVTLSEGAFLTINCTYTSTGYPTLFWYVQYPGEGPQLFLKATQANDKAINKGFEATYKRE
TTSFHLEKASVHESDSAMYYCVLSDTVTGTAGGA
>V67RF-JZKE01143915.1-trav |(5771, 6058)|2.01913031007|(0.726,0.592,0.945)|-1
EVRGLQVQQSPSVLSLQEGTSPTLRCNFSATVYNMQWFRQNPGGGLISLFFMTSGTKQNG
RLNSTMNSKELYSTLHITASQLEDSGTYLCAVQE
>V68RF-JZKE01143915.1-trav |(12659, 12952)|2.87947106565|(0.941,0.970,0.977)|-1
VSRGENVEQRPSTLHVQEGDTSVINCTYSDSASSYFPWYKQELGKGPQLFIDIRSNLDKK
QDQRITLLLNRMTKHLSLHIAATQPGDSAVYFCVAS
>V69RF-JZKE01143915.1-trdv |(19560, 19869)|2.39889394427|(0.828,0.757,0.834)|-1
SSITQKVTQDQPAMLVQEKEAVTLDCTYDTSTSVNNFALFWYKQPSSGEMLLLIRQDSYN
QQNATEGRYSLNFQKAKKSIHLLISASQLEDSAMYFCALKK
>V70RF-JZKE01143916.1-trav |(6285, 6609)|1.59723309571|(0.601,0.571,0.483)|-1
AQSKDQVFQLPMVASSEGAVVEISCNHSVSNAYNFFWYLQFPGCAPRLLVKGSKPSQQGR
YNMTYERFSSSLLILQVQEADAAVYYCAVEDTEAGNPSRAEQKQRE
>V71RF-JZKE01143916.1-trav |(14368, 14665)|2.09105150551|(0.921,0.787,0.672)|-1
GLRAQSVTQPEDQVTVSEGNPLTVKCTYSYSGSPYLFWYVQYPNEGLQFLLKYIRGDNLV
KGSHGFEAEFNKSQTSFHLKKASACGSDSALYFCAVS
>V72RF-JZKE01143916.1-trav |(31693, 32009)|2.21423728786|(0.781,0.911,0.652)|-1
QSVTQPDGHITVSEGDPLELRCNYSSSVPPSLFWYVQYPNQGLQLLLKYTSGNSLVTGIK
SFKAEFNRSETSFQLKKASAHLSDSAQYFCAVSDTVPGAAGGA
>V73RF-JZKE01143916.1-trav |(38882, 39172)|2.884671556|(0.989,0.936,0.972)|-1
ISRGEKVEQSPFLSVQEGDSSVINCTYTESTSTYFYWYKQGPGEGPQLLMTILSSMDKKQ
EQRLSVLLNKREKHLSLHISDTQPGDSAVYFCAVS
>V74RF-JZKE01143916.1-trav |(40477, 40765)|2.88564084149|(0.955,0.959,0.973)|-1
VNSQKIEQNPRALNIHEGETAAVTCNYTSYSPAFLQWYRQDPERGLVFLLLIRENEGEKQ
EGRLKVTFDTTHKQSSFYITDSQPADSATYLCAA
>V75RF-JZKE01143916.1-trav |(59581, 59872)|2.95679201242|(0.985,0.991,0.981)|-1
SHGDSVTQTDGQMLLTEGDSLIVNCSYETRQYPALFWYVQYPGEGLQLLLKAAKANDKGI
NKGFEATYNRETTSFHLEKASVHVSDSAVYYCALS
>V76RF-JZKE01143916.1-trav |(65263, 65563)|2.06096529859|(0.863,0.819,0.611)|-1
DARAQSVTQPDLSITVSEGASLELRCNYSYRGGNVYLFWYVQYPGQGLQLLLRYYSGNTL
VQGMKGFEAEVRKNEFSFTLRKPSVHWSDAAEYFCALS
>V77RF-JZKE01196378.1-trbv |(847, 1154)|2.88522155506|(0.970,0.949,0.968)|-1
HTDAGITQNPRFRVTETGKQVTLRCHQTDKYDYMYWYRQDLGRGLRLIHYSYGVQRTDKG
EFSEGYNVSRSDMEDFPLTLESATPSQTSVYFCAISDSTA
>V78RF-JZKE01235368.1-ighv |(1130, 1439)|2.99696400065|(1.000,0.997,1.000)|-1
VQCQVQLVESGGGLVQPGGSLTLSCAASGFTFSSYWMYWVRQAPGKGLEWVSSINYGGGS
TYYADGVKGRFTISRDNSKNTLSLQMNSLRAEDTAVYYCAK
>V79RF-JZKE01238797.1-iglv |(185, 497)|2.98267205249|(0.997,0.998,0.988)|-1
SWAQSALTQPPSVSGAPGQTVTISCTGSSSNIGGGYYASWYQQLPGSAPKLLIYYDSDRP
SGIPARFSGSKSGSSASLTITGLQAEDEADYYCAAWDTSLSG
>V80RF-JZKE01238797.1-iglv |(4422, 4732)|2.99280401921|(1.000,0.993,1.000)|-1
SLANFVLTQPSSVSGSPGQKVTISCTRSSGNIGDNYVSWYQQRPGSAPTTVIYDDNQRPS
GVPDRFSGSIDSSSNSASLTISGLQSEDEADYYCQSYDSSA
>V81RF-JZKE01238799.1-iglv |(2255, 2565)|2.99698000014|(1.000,0.998,0.999)|-1
SLANFVLTQPSSVSGSPGQKVTISCTRSSGNIGSYYVHWYQQRPGSAPTTVIYNDNQRPS
GVPDRFSGSIDSSSNSASLTISGLQSEDEADYYCQSYDSSA
>V82RF-JZKE01238800.1-iglv |(606, 916)|2.87184182274|(0.990,0.935,0.962)|-1
SLSQPVLTQPPSLSASPGASARLTCTLSSGFSVGSYAIYWYQQKPGSPPRYLLSYYSDSS
KHQGSGVPSRFSGSKDASANAGILHISGLQPEDEADYYCMA
>V83RF-JZKE01238817.1-iglv |(491, 803)|2.18618600389|(0.713,0.721,0.762)|-1
RWAEVVFTQPHSVSGSPGQKVIISCTRSSGNVGDNYVSWYQQRPGSAPTAVIYDDDQRPS
GVPDRFSGSIDSSSNSASLIISGLQPDDDADYHCLSGYDNYY
>V84RF-JZKE01255181.1-ighv |(445, 754)|3.0|(1.000,1.000,1.000)|-1
VQCEVQLVESGGGLVQPGGSLTLSCAASGFTFSDYYMHWVRQAPGKGLEWVSYISSSGGS
TYYADAVKGRFTISRDNSKNTLSLQMNSLRAEDTAVYYCVR
>V85RF-JZKE01255182.1-ighv |(1026, 1335)|2.9969280013|(0.997,1.000,1.000)|-1
VQCEVQLVESGGGLVQPGGSLTFSCAASGFTFSSYNMHWVRQAPGKGLEWVSYISNTGGS
TYYAEAVKGRFTISRDNSKNTLSLQMNSLRAEDTAVYYCAG
>V86RF-JZKE01278248.1-ighv |(4833, 5139)|2.99698000014|(0.998,0.999,1.000)|-1
VQCEVQLVESGGGLIQPGGSLTLSCAASGFTISSYYMDWVRQASGKGLEWVSAISSGGST
YYADAVKGRFTISRDNSKNTLSLQMNSLRAEDTAVYYCAR
>V87RF-JZKE01278249.1-ighv |(3382, 3691)|2.69834793037|(0.941,0.829,0.985)|-1
IQCEVHLVESGGGLVQPGASLKLSCAASGFSFSSYGMNWVRQAPGKGLEWVSHIDYDAGS
TYYADAVKGRFTISRDNSKNTLSLQMNSLRAEDTAMYYCAR
>V88RF-JZKE01278253.1-ighv |(3391, 3700)|2.91634954035|(0.979,1.000,0.944)|-1
VQCEVQLVESGGGLVQPGGSLRLSCAASGFTFSDYYMHWVRQAPGKGLEWVSYIYSDGGD
TNHADAVKGRFTTSTDNGKNMLYLQMNSLRAEDTAVYYCAR
>V89RF-JZKE01278255.1-ighv |(2535, 2844)|3.0|(1.000,1.000,1.000)|-1
VQCEVQLVESGGGLVQPGGSLTLSCAASGFTFSSYWMYWVRQAPGKGLEWVSSINSGGGS
TYYADAVKGRFTISRDNSKNTLSLQMNSLRAEDTAVYYCAK
>V90RF-JZKE01278267.1-ighv |(5092, 5401)|2.99899200002|(0.999,1.000,1.000)|-1
VQCEVQLVESGGGLVQPGGSLRLSCAASGFTFSSYGMNWARQAPGKGLEWVSTINYDGSS
TSYADAVKGRFTISRDNSKNTIYLQMNSLRAEDTAVYYCAK
>V91RF-JZKE01278268.1-ighv |(3308, 3617)|2.99899200002|(0.999,1.000,1.000)|-1
VQCEVQLVESGGGLVQPGGSLTLSCVASGFTFSSYYMHWVRQAPGKGLEWVSYINTAGGS
TSYADAVKGRFTISRDNSKNTLSLQMNSLRAEDTAVYYCAR
>V92RF-JZKE01278271.1-ighv |(48, 354)|3.0|(1.000,1.000,1.000)|-1
VQCEVQLVESGGGLAQPGGSLTLSCAASGFTFSNYGMHWVRQAPGKGLEWVSAISSGGST
YYADAVKGRFTISRDNSKNTLSLQMNSLRTEDTAVYYCAK
>V93RF-JZKE01278271.1-ighv |(7402, 7711)|2.99593600205|(1.000,1.000,0.996)|-1
VQCEVQLVESGGGLVQPGGSLTLSCAASGFTFSSYDMSWVRQAPGKGLEWVAVIWADGSK
QYYADSVKGRFTISRDNGKNMLYLQMNSLRAEDTAMYYCAS
>V94RF-JZKE01278273.1-ighv |(24, 333)|2.97236527997|(0.999,0.979,0.996)|-1
VQCEVQLVESGGGLVQPGGSLTLSCAASGFTFSSYVMYWFRQAPGKGLEWVSRISSSGGS
TSYADALKGRFTISRDNSKNTLSLQMNSLRAEDTAVYYCAK
>V95RF-JZKE01278276.1-ighv |(456, 765)|2.99798400013|(1.000,1.000,0.998)|-1
VQCEVQLVESGGGLVQPGGSLKLSCAASGFTFSSYGMNWVRQAPGKGLEWISHINYDAGS
TYYADAVKGRFTISRDNSKNTLSLQMNSLKAEDTAVYYCAK
>V96RF-JZKE01278277.1-ighv |(1432, 1741)|2.96936527997|(0.996,0.976,0.999)|-1
VQCEVQLVESGGGLVQPGGSLTLSCAVSGFTVSSYGMNWVRQAPGKGLEWVSYIYSDGGS
TNYADAVKGRFTTSTDKSKNTLSLQMNSLRAEDTAVYYCAR
>V97RF-JZKE01278602.1-ighv |(13, 322)|2.99799600001|(0.999,1.000,0.999)|-1
VQCEVQLVESGGGLVQPGGSLTLSCAASGFTFSSYWMSWVRQAPGKGLEWVSTISHTGGS
TYYADALKGRFTISRDNSKNTLSLQMNSLRTEDTAVYYCAR
>V98RF-JZKE01278602.1-ighv |(4600, 4909)|2.96842016586|(0.994,0.982,0.993)|-1
VQCEVQLVESGGGLVQPGGSLRLSCVASGFTFSSYVMYWFRQSPGKGLEWVSRISSSGGS
TSYADALKGRITISRDNSKNTLSLQMNSLRAEDTAVYYCAI
>V99RF-JZKE01278605.1-ighv |(401, 710)|2.99899200002|(0.999,1.000,1.000)|-1
VQCEVQLVESGGGLVQPGGSLTLSCAASGFTFSDYYMSWVRQAPGKGLEWVSRISSDGTS
TYYADAVKGRFTISRDNSKNTLSLQMNSLQAEDTAVYYCAR
>V100RF-JZKE01278607.1-ighv |(3705, 4014)|2.99899200002|(0.999,1.000,1.000)|-1
VQCEVQLVESGGGLVQPGGSLTLSCAASGFSFSSYWMHWVRQAPGKGLEWVSYINSAGGS
TYYADAVKGRFTISRDNSKNTLSLQMNSLRAEDTAVYYCAR
>V101RF-JZKE01278609.1-ighv |(657, 966)|2.99698000014|(0.998,0.999,1.000)|-1
VQCEVQLVESGGGLIQPGGSLTLSCAASGFSFSSYRMNWVRQAPGKGLEWISYISSGGGS
TYYADAVKGRFTISRDNSKNTLSLQMNSLRAEDTAVYYCAR
>V102RF-JZKE01278610.1-ighv |(3774, 4083)|2.99799600001|(0.999,0.999,1.000)|-1
VQCEVQLVESGGGLVQPGGSLTLSCAASGFSFSSYDMSWVRQAPGKGLEWVSYINYGGGS
TSYADAVKGRFTISRDNSKNTLSLQMNSLRADDTAVYYCAS
>V103RF-JZKE01278610.1-ighv |(12525, 12834)|2.97878801933|(0.996,0.989,0.994)|-1
VHCEVQLVESGGGLVQPGGSLTLSCAASGFTVSSYCMSWVRQAPGKGLEWVSYIYSDGGS
RNYADAVKGRFTTSTDNGKNTLYLQMNSLRAEDTALYYCAR
>V104RF-JZKE01278611.1-ighv |(583, 892)|2.97129965252|(1.000,1.000,0.974)|-1
VQCEVQLVESGGGLVQPGGSLRLSCVASGFTFSDYYMSWVRQAPGKGLEWVLYIYSDDGD
TSYADAVKGRFTISTDNGKNMLYLQMNSLRAEDTAVYYCAR
>V105RF-JZKE01278611.1-ighv |(6883, 7192)|3.0|(1.000,1.000,1.000)|-1
VQCEVQLVESGGGLVQPGGSLKLSCAASGFTFSSYGMNWVRQTPGKGLEWISYINSAGGS
TSYADAVKGRFTISRDNSKNTLSLQMNSLRAEDTAVYYCAR
>V106RF-JZKE01278614.1-ighv |(2171, 2477)|2.99696400065|(1.000,0.997,1.000)|-1
VQCEVQLVESGGGLVQPGGSLTLSCAVSGFTVSSYDMSWIRQASGKGLEWVSYISYGGST
YYADAVKGRFTISRDNGKNTLSLQMNSLRTEDTAVYYCAR
>V107RF-JZKE01294658.1-trbv |(4105, 4408)|1.58802587027|(0.577,0.441,0.722)|-1
SVLAVLVSQTPSRVICQRGTSVTIQCHVDSQVSLMFWYRQLPGQNLMLMATANQGSEATY
ENRFTKDKFPISRPNLTFSNMTVSNVSPEDSSLYLCSAG
>V108RF-JZKE01294660.1-trbv |(1696, 1993)|2.46585031989|(0.782,0.921,0.973)|-1
PVEAQVTQTPRNRITETGKNVTVTCSQNMNHEYMSWYRQDPGLGLKLIYYSAKVEFVTKG
DAPDGYTASRREKPSFSLNVESTRTSQTALYLCASSL
>V109RF-JZKE01294664.1-trbv |(5111, 5409)|1.61947776751|(0.884,0.574,0.661)|-1
SMDAGVTQTPRNRIAKTGQSILLECSQTEAHDRMYWYRQDPGLGLWLIYYSLGVNSTNEG
EVSKGYSVSRKEHAKFSLSLETAVPNQTALYFCASSH
>V110RF-JZKE01294668.1-trbv |(161, 463)|2.93976429988|(0.993,0.984,0.966)|-1
HTDAGITQNPRFRVTETGKQVTLRCHQTDKHDYMYWYRQDLGHGLRLIHYSIGAGNTEKG
QFSDGYSVSRSNEQNFSLTLESATPSQTSVYFCASSDST
>V111RF-JZKE01294668.1-trbv |(25796, 26084)|2.39340853889|(0.756,0.865,0.915)|-1
AMVMQNPRYQVTRVGKTVTLSCSQNMNHNTMYWYQQKLSQAPKLLFYYYEREFNNETDTS
DNFQPSRPDTSSSSLDIRSPGLGDSAMYLCATSR
>V112RF-JZKE01294668.1-trbv |(32591, 32891)|2.23672797585|(0.767,0.868,0.675)|-1
SSGEEVTQTPGHLLKGKGQKVKMYCVPIKGHRYVFWYQQILGKEFKFLFSFQDKEIFEET
EMLKQRFSAECPQNLPCSLEIQTAELQDSAVYLCASSE
>V113RF-JZKE01294668.1-trbv |(34372, 34680)|2.33436138474|(0.809,0.882,0.706)|-1
HAEPAVSQTPSYQVTQMGQGVILRCDPISGHIFLYWYQQNHRQEMKFLLSFHYQNIAAES
AMPKERFSAERPNGTYSTLKIRPAEPGDSAVYLCASGSDTA
>V114RF-JZKE01294669.1-trbv |(2779, 3079)|2.54139891103|(0.809,0.911,0.885)|-1
HMGAGVSQSPRHKITMRGQNVTLRCDPISGYTFLFWYQQTLGQGPQLLIYFQDKDVVDKS
KLTGDRISAERPEGSFSRLKIQPAEQGDSAVYLCASSL
>V115RF-JZKE01294669.1-trbv |(11432, 11727)|1.96306304191|(0.867,0.856,0.558)|-1
PTEAGVTQTPRHLIKARGQQVTLRCSPVSGHNRVYWYQQALGQGLQFLIQYYNGEEGEKG
NFPARFSGHQFSDYRSELNMSALELGDSALYLCASN
>V116RF-JZKE01294669.1-trbv |(21670, 21960)|2.81074205679|(0.943,0.914,0.958)|-1
DAGVIQSPRHLIKGKQETTILKCYPLSGHDTVYWYQQAPGQGLQFLISYYEKMQREKGNI
PQRFSGQQFADYHSELNLSSLEPGDSALYLCASSL
>V117RF-JZKE01294672.1-trbv |(4950, 5250)|2.43894239438|(0.813,0.834,0.795)|-1
HTGAGVSQSPRHKVTERGQNVSLRCDPISGHVSLFWYRQTPGQGLQLLIYFQGADATDKS
GLPSDRISAERPEGSFSTLKIQPAEQGDSAVYLCASSL
>V118RF-JZKE01294688.1-trbv |(5280, 5566)|1.94376473871|(0.734,0.803,0.551)|-1
AGVTQTPRHLIKARGQQVTLRCSPVSGHASVYWYQQALGQGPQFLIQYYDGEEGEKGNFP
ARFSGHQFSDYRSELNMSALELGDSALYLCDSS
>V119RF-JZKE01294690.1-trbv |(9942, 10239)|2.80937406219|(0.919,0.969,0.932)|-1
PLDTAVFQTPKYLVSQMGNNVSLKCKQTLGHNTMYWYKQDSEKLLKIMFAYNNKELILNE
TVSNRFSPASPDKAHLNLHIESPEPDDSAVYLCASSY
>V120RF-JZKE01294692.1-trbv |(174, 471)|2.88185507227|(0.942,0.984,0.965)|-1
PVDTGITQTPRHLVMGMTDKKSLKCEQNLGHDAMYWYKQSAKKPPELMFYYNYQELRENL
TVSSRFSPECPDSSHLYLHLDALQPDDSAMYLCASSQ
>V121RF-JZKE01294699.1-trbv |(3116, 3413)|2.41755005294|(0.787,0.821,0.818)|-1
PMDTAVFQTPKYLLTETGNNVSLKCEQTLGNDAMYWYKQDSEKLLKIMFTYNNKELILNE
TVSNRFSPGSPDKAHLNLHIESPEAGDSAVYLCASSY
>V122RF-JZKE01294700.1-trbv |(9965, 10265)|2.39351678399|(0.806,0.739,0.904)|-1
HTEPGVIQTPTYQVIEKGQEVILRCDPISGHLYFYWYQQIWGQKVEFLVSFYNDNISEKS
KIFKDRFSLERPRGSYLALKIQSTEPEDSATYLCASSP
>V0RF-AGCE01061995.1-trbv |(4895, 5202)|2.92632580233|(0.979,1.000,0.952)|1
PVTAGVTQTPKFQVLKSGQSMTLQCAQDMNHDGMYWYRQDPGMGLRLIHYSVGEGTTAKG
EVPDGYNVSRSNTKDFPLRLEAAAPSHTSVYFCASSDSTV
>V1RF-AGCE01061995.1-trbv |(16809, 17122)|2.96845211916|(0.992,0.996,0.981)|1
PLDSAVSQTPKYLVTQMGKKESLKCEQNLGHDTMYWYKQDSKKLLKIMFIYNNKEPILNE
TVPNRFSPESPDKAHLNLHIESLELGDSAVYFCASSQDTALQ
>V2RF-AGCE01061995.1-trbv |(20780, 21093)|2.34731709456|(0.926,0.844,0.737)|1
PMDTGVTQTPKHLVMGMAHNKSLKCEQNLGHNAMYWYKQKAKMPLELMFIYSFQKQTENN
SVSSRFTPECPDSSHLHLHLHALQPEDSALYLCASSQDTALQ
>V3RF-AGCE01061995.1-trbv |(27181, 27477)|2.21381592236|(0.915,0.727,0.777)|1
LGEAGVTQTPRHLIKMRGQQVTLRCSPVSGHNRVFWYQQAPGQGPQFLFNYYNEMQRQKG
NFPDRFSGHQFSNHSSEMNVSALELGDSALYLCASSL
>V4RF-AGCE01061995.1-trbv |(36451, 36748)|2.90760549808|(0.994,1.000,0.930)|1
PVNAGVTQTPKFQVLKTGQSITLQCAQDMNHDRMYWYRQDPGMGLRLIHYSVGEGTTAKG
EVPDGYKVSRSNTKDFPLRLEAAVPSQTSMYFCASSD
>V5RF-AGCE01061996.1-trbv |(2395, 2695)|2.31072811927|(0.945,0.860,0.719)|1
HTGAGVSQSPSNKVTEKGKDVILRCDPISGHNALYWYRQSPGKGLEFLIYFQGKDAPDKS
GLPSDRFFAERAGGSSSTLKIQRTEQNDSAVYLCASSL
>V6RF-AGCE01061997.1-trbv |(5744, 6035)|2.53821187295|(0.929,0.823,0.853)|1
AGVSQSPSHKVTEKGKDVALSCDPISGHTVLYWYRQSPGQGPEFLIYFQGKNIADDSGLS
SDRFSAERPMGSVSTLQIQRTEQADSAVYLCASSL
>V7RF-AGCE01061997.1-trbv |(11316, 11637)|2.00287011021|(0.864,0.706,0.669)|1
QAEVTQSPTHLIQTRGQQVTLRCSPISGHTSVSWYQQASGQGPQFIFEYVDELKRSEGNF
PGRFSGYQFSDYHSEMNISTLELEDSALYLCASSLAQPCRVTATL
>V8RF-AGCE01061997.1-trbv |(14019, 14315)|1.84835116399|(0.939,0.519,0.902)|1
PVDSGVTQTPKHLLTAIGQQVTLRCSPRSGDLSVYWYRQSLDQSLQFLIQYYNKNEGEKG
NIPERFSGNQFPNMSSELNLSSLELGDSALYFCASSI
>V9RF-AGCE01061998.1-trbv |(1696, 1993)|2.90308808336|(0.991,0.934,0.991)|1
HGDAEITQSPRHKGTETGRQVTLKCHQTWNHNYMYWYRQDLGHGLRLIHYSYGVQDINKG
EVSDGYVASRSNLEDFPLTLESALSSQTSVYFCASSD
>V10RF-AGCE01062000.1-trbv |(935, 1235)|2.4234689921|(0.803,0.831,0.793)|1
QTDAGVIQSPRHKVTQMGQSVTLRCEPISGHNDLLWYRQTLVQTLELLSYFRSQTRVDDS
EMPQDRFSAEMPNASFSSLRIQPTEPRDSALYLCASTF
>V11RF-AGCE01062000.1-trbv |(15550, 15847)|2.89167100508|(0.989,0.941,0.972)|1
HGDAEITQSPRHKVTKTRRQVTLKCHQTWNHNYMYWYRQDLGHGLRLIHYSVAADNTEKG
EVSHGYVVSRSNTEDFPLTLESATHSQTSVYFCASSD
>V12RF-AGCE01062000.1-trbv |(27286, 27586)|2.14166487101|(0.690,0.773,0.707)|1
CTDTGIIQSPKHEVTEMGQAVTLRCEPILGHNLLFWYRQTLVQGLELLSYFRGRSIIDDE
QMPKDRFSAERPDGSFSTLRIQPAEQGDSAVYICASRL
>V13RF-AGCE01062002.1-trbv |(433, 734)|2.84110798542|(0.960,0.961,0.925)|1
NAGVTQTPKFQVLKKGQSMTLQCAQDVNYDCMYWYRQDPGMGLRLIYYSVDEGITDKGEV
HHGYNVSRSNREDFPLRLEAAALFQTSVYFCAISASTV
>V14RF-AGCE01062002.1-trbv |(6169, 6469)|2.1586208781|(0.966,0.801,0.716)|1
HTGAGVSQSPRYKVTKRGLDIAFRCDPISGHEMLYWYRGTLGQSPEYLTYFQYEVQQDKS
GLPSDRFSAERTGGSFSTLKIQRTEQEDSAVYLCASSS
>V15RF-AGCE01062004.1-trbv |(4599, 4895)|2.41623932257|(0.879,0.884,0.734)|1
PVEAGVTQNPTHLIKTRGQQVTLRCSPISGHTSVSWYQQALGQGPEFILEYYEKKERNRG
NFPHRFSGHQFRDYSSDLNVSNLERGDSALYLCASSL
>V16RF-AGCE01062006.1-trbv |(795, 1091)|2.41623932257|(0.879,0.884,0.734)|1
PVEAGVTQNPTHLIKTRGQQVTLRCSPISGHTSVSWYQQALGQGPEFILEYYEKKERNRG
NFPHRFSGHQFRDYSSDLNVSNLERGDSALYLCASSL
>V17RF-AGCE01062008.1-trbv |(590, 890)|2.87679048042|(0.976,0.970,0.937)|1
HAGAGVSQDPRHKVTKTGQNVTFRCDPISGHNSLYWYRQTLGQSPEFLTYFQNEVQLDKS
GLPSDRFFAERTKGSFSTLKIQRTEQGDSAMYLCASSL
>V18RF-AGCE01062008.1-trbv |(6797, 7094)|2.81011271541|(0.961,0.892,0.977)|1
SVAAGVIQYPRHLIKEKRKTAILKCYPIPGHDTVYWYQQGPGQGLQFLISYYEKTQRDKG
SIPDRFTAQQFSDYHSELNMSSLELGDSALYLCASSL
>V19RF-AGCE01062009.1-trbv |(1447, 1744)|2.93076891711|(0.989,0.984,0.961)|1
HMDGRITQSPRHKVTETGTPVALRCHQTENHRYMYWYRQDLGHGLRLIYYSYGVKDISKG
EVPDGYNVSRSNTEDFPLTLESTTGSQTSVYFCASSD
>V20RF-AGCE01062009.1-trbv |(16503, 16803)|2.86978128928|(0.979,0.951,0.947)|1
HTDAGVIQSPQHKMTEMGQEVTLRCEPISGHTQLFWYRQTVMRGLELLTYFNNENLIDDS
GMPKDRFSAQMPNASFSTLKIQPSEPGDSAVYFCASSL
>V21RF-AGCE01062009.1-trbv |(38765, 39065)|2.82228663903|(0.955,0.972,0.906)|1
HTAAGVTQFPSHRVIEKGQAVTLRCDPISGHEYLYWYRRVMGKEIKFLIYFLRDSKQDES
GMPNHRFSAERTGGTNSTLKVQSAELEDSGIYFCASSL
>V22RF-AGCE01062009.1-trbv |(43861, 44158)|1.82295176522|(0.874,0.734,0.581)|1
HGDAMVIQNPRYQVTQSGKPVTLSCSQNLKHNAMYWYQQKPSQAPKLLLYYYDKDLNTEA
DTPDNFQSRRPNTSFCFLDIRSSGLGDAATYLCASSR
>V23RF-AGCE01062009.1-trbv |(48813, 49110)|2.12117932527|(0.831,0.630,0.811)|1
SPGEEVTQTPRHLVKAKGQKAILYCIPIIGHDYVFWYQQVRKEFKFLISFQNENIFDETG
MPKKRFSAKCTQNSPCSLEIQATEMQDSAVYLCASSQ
>V24RF-AGCE01062011.1-trbv |(9642, 9942)|2.47276224868|(0.845,0.777,0.872)|1
LSNAGVTQNPRHLVRRKGQEARLRCSPVKGHNHVYWYQQLLGEGLKFMIYLQRESTIDES
GMPKEQFSAEFPKEGPSVLRIQQAERGDSAAYFCASSV
>V25RF-AGCE01062012.1-trbv |(4859, 5168)|1.62207800815|(0.550,0.481,0.724)|1
GSGLGAVVSQHPSRVICKSGTSVKIECRALDFQATTMFWYRQSQKEGLMLMATSNEGSKA
TYEQGFSEDHFPISHPDLTSSSLTVASAQPEDSSFYLCSGR
>V26RF-AGCE01062012.1-trbv |(11525, 11825)|2.27901361347|(0.891,0.705,0.828)|1
SLDTKVTQRPRHVVTAKEQKAKMDCVPIKGHGYVYWYHKKLEEELKFLFYLQNGEIIQKA
EEINERFSAQCPENSPCALEIQSTESGDAGLYFCASSK
>V27RF-AGCE01062014.1-trbv |(10290, 10587)|2.01652798426|(0.656,0.945,0.712)|1
FMEADLYQTPRHCVIGTGKKITLECSQTMGHDRMYWYQQDPGMELKLIHYSHGVNSTEKG
DLSSESTVSRIRKENFLPTLESASPSSTSQYLCTSSE
>V28RF-AGCE01062014.1-trbv |(50744, 51051)|1.95622380055|(0.848,0.959,0.530)|1
PLEAQVTQNPRYLITVTGKKLTVTCSQNMNHEYMSWYRQDPGLGLRQIYYSNNVDLVDKG
DVPEGYNVSRKEKRNFPLILERPRPNQTSLYLCASSLSTV
>V29RF-AGCE01062014.1-trbv |(56057, 56354)|2.55864467633|(0.897,0.818,0.871)|1
LVEVKVTQNPRYLVKRVGEKVFLECAQDMDHGRMFWYRQDPGLGLRLIYFSYDIKTDEEG
DVPDGYSVSREKKEQFSLILGSARTNQTSVYLCASSS
>V30RF-AGCE01062014.1-trbv |(68614, 68917)|2.00754086337|(0.640,0.683,0.713)|1
SVFGAVVSQKPSRGVCQRGTSMTIQCHVDSQVTLMFWYRQLPGQSMTLIATANQGSDATY
EKGFAKDKFPISRPNLVFSTLNVSNVSPEDSGVYFCSAG
>V31RF-AGCE01134597.1-igkv |(30724, 31039)|2.41524430694|(0.998,0.720,0.967)|1
STGDIVMTQTPLSLPVTLGEPASISCRSSQSLLHSNGYTYLNWYLQKPGQSPQLLIYRVS
NRASGVPDRFSGSGSGTDFTLKISRVEAEDVGVYYCMQATQTP
>V32RF-AGCE01134598.1-igkv |(8615, 8915)|2.45884405031|(0.840,0.879,0.767)|1
ARCDIQMTQSPSFLSASAGDRVTITCQVSQGISNELPWYQQKPGKAPTLLIFAATRLQSG
IPSQFSGPGSGTDFTLNISSLQPDDFATYYCQQDYSYP
>V33RF-AGCE01134599.1-igkv |(6643, 6943)|2.79067779488|(0.998,0.863,1.000)|1
ARCDIQMTQSPSSLSASVGDRVTITCRASRSISTELDWYQQKPGKAPVLLIYAASSLQTG
VPSRFSGSGSGTDFTLTISSLQPEDVATYYCQQDYSYP
>V34RF-AGCE01134600.1-igkv |(5149, 5453)|2.31485759025|(0.955,0.668,0.974)|1
SSGDIVMTQSPLFLPVTPGKPASISCRSSQSLLYSDGNTYLNWFLQKPGQPPRRLIYKVS
TRDSGVPDRFSGSGSGTDFTLKISQVEAEDVGVYYCMQA
>V35RF-AGCE01134600.1-igkv |(15938, 16236)|2.91139047236|(0.981,0.951,0.983)|1
DIVMTQTPLSLSVTPGKPASIVCRSSQSLFDSEDGNTYLNWYLQKPGQSPQLLIYDASTH
ASGVPDRFSGSGSGTDFTLKISRVEAEDVGVYYCMQA
>V36RF-AGCE01134600.1-igkv |(26942, 27257)|2.82968861185|(0.997,0.887,0.993)|1
SSGDIVMTQTPLSLPVTPGEPASISCRSSQSLLHSDGYTYLDWYLQKPGQSPQLLIYTVS
NRASGVPDRFSGSGSGTDFTLKISRVEAEDVGVYYCMQATQAP
>V37RF-AGCE01134600.1-igkv |(34924, 35224)|2.9898400105|(0.994,1.000,0.996)|1
TRCDIQMTQSPSSLSASVGDKVTITCQASQGINSWLAWYQQKPGKAPRLLIYAASSLQTG
IPSRFSGSGSGTHYTLTISSLQPDDFATYYCQQTYSTP
>V38RF-AGCE01134600.1-igkv |(45692, 45992)|2.98753206285|(0.991,0.997,1.000)|1
ARCDIQMTQSPTFLSASVGDRVTITCQASQSIGSALAWYQQKPGKATRLLIYAASSLQSG
VPSRFSGSGSGTDFTLTISSLQPDDFATYYCQQYSSFP
>V39RF-AGCE01134602.1-igkv |(4964, 5279)|2.92580524432|(0.987,0.972,0.969)|1
SSGDIVMTQTPLSLSVTPGEPASISCRSSQSLLHSNGNTYLHWFLQKPGQSPQRLIYRVS
NLASGIPDRFSGSGSGTDFTLKISRVEAEDIGVYYCVQSIQTP
>V40RF-AGCE01134603.1-igkv |(27342, 27657)|2.21905695568|(0.987,0.763,0.792)|1
SSGDTVMTQTPLSLPVTLGEPASISCRSSQSLLHSNGNTYLHWYLQKPGQSPQLLIYKVS
NRASGVSDRFSGSGSGTDFTLKISRVKAEDIGVYYCMQSTWFP
>V41RF-AGCE01134603.1-igkv |(35325, 35640)|2.82582865271|(0.991,0.893,0.980)|1
SSGDIVMTQTPLSLPVTPGEPASISCRSSQSLLYSDGKNYLYWYLQKPGQSPQLLIYLGS
NRASGVPDRFSGSGSGTDFTLKISRVEAEDVGVYYCMQGIELP
>V42RF-AGCE01134604.1-igkv |(11428, 11728)|2.95320464967|(1.000,0.997,0.962)|1
TRCDTQMTQSPSSLSASVGDRVTITCRASQSISNWLAWYQQKPGQVPKLLIYKASTLQSG
VPSRFSGSGSGTDFTLTISSLQPEDVATYYCQKCNSAP
>V43RF-AGCE01134604.1-igkv |(23700, 24015)|2.94808521936|(0.998,0.970,0.984)|1
SSGDIVMTQTPLSLPVTPGEPASISCRSSQSLLHSNGNTYLSWYLQKPGQSPQLLIYKVS
NRASGVPDRFSGSGSGTDFTLKISRVEAEDVGVYYCMQDTKTP
>V44RF-AGCE01134604.1-igkv |(38298, 38600)|2.39109889377|(0.919,0.721,0.898)|1
STGDIVMTQSPLFMPVTLGKPASISCRSSQSLLHSNGNTYLSWFLQKPGQSPRRLIYKVS
TRDSGVPDRFSGSGAGTDFTLKISTVEAEDVGVYYCLQS
>V45RF-AGCE01134608.1-igkv |(4999, 5297)|2.02986463391|(0.986,0.562,0.995)|1
SRGDIVMTQSPAFFSGTPGEKVTITCRASEGISKYLHWYQQKPDQAPKLLIQYASQSISG
VPSRFSGSGSGTDFTLTISSLEVEDAATYYCQQGNKW
>V46RF-AGCE01134609.1-igkv |(1163, 1478)|2.60507979101|(0.983,0.783,0.987)|1
SSGDIVMTQTPLTLPVTLGKPASISCRSSQSLLYSDGKNYLHWYLQKPGQSPQLLIYTAS
NRFSGVPDRFSGSGSGTDFTLKISTVEAEDVGVYYCMQAIKHP
>V47RF-AGCE01134610.1-igkv |(3122, 3422)|2.99196000066|(0.996,0.999,0.997)|1
TRCDIQMTQSPSSLSASVGDKVTITCQASQGISNNLAWYQQKTGKAPRLLINEASSLESG
VPSRFSGSGSGTDFTLTISSLQPEDSATYYCQQHNSYP
>V48RF-AGCE01134612.1-igkv |(802, 1102)|2.99899600001|(1.000,0.999,1.000)|1
ARCDIQMTQSPSSLSASVGDKVTITCQASQGINNYLAWYQQKPGKAPRLLIYYASSLDSG
VPSRFSGSGSGADYTLTISSLQPEDFATYYCQQYNSYP
>V49RF-AGCE01134613.1-igkv |(4841, 5141)|2.99899600001|(1.000,0.999,1.000)|1
ARCDIQMTQSPSSLSASVGDKVTITCQASQGINNYLAWYQQKPGKAPRLLIYYASSLQSG
VPSRFSGSGSGADYTLTISSLQPEDFATYYCQQYSSYP
>V50RF-AGCE01134614.1-igkv |(11222, 11522)|2.98270402421|(0.995,0.988,1.000)|1
ARCDIQMTQSPSSLSASVGDKVTITCQASQGISKWLAWHQQKPGKAPKLLIYEASKLQSG
VPSRFSGSGSGTDFTLTISSLQPEDFATYYCQQYNSNP
>V51RF-AGCE01134616.1-igkv |(2365, 2665)|2.97156408064|(0.995,0.992,0.985)|1
STGQIVMTQSPATLSLSPKETATLSCRASQSVSSYLAWYQQKPGQAPRLLIYGASTRATG
IPDRFSGSGSGTEFTLTISSLEPEDFAVYYCQQYNNRP
>V52RF-AGCE01134616.1-igkv |(22982, 23284)|1.73314863933|(0.960,0.650,0.692)|1
SSGDIVMTQTPLSLPVTRGELASISCRSSQSLLHSNGNTYLWWYLQKPGQSPQPLIYKVS
NRFSGVPERFSGSGSETDFTLKISRVEAEDVGVYYCMQG
>V53RF-AGCE01134616.1-igkv |(27065, 27365)|2.99899200002|(0.999,1.000,1.000)|1
ARCDIQMTQSPSSLSASVGDTVTITCQASQGISKWLAWYQQKPGKAPKLLIYDASKLQSG
VPSRFSGSGSGTDFTLTISSLQPEDFATYYCQQHNSNP
>V54RF-AGCE01134617.1-igkv |(5600, 5900)|2.73511071856|(0.977,0.989,0.841)|1
TSGQIVMTQSPATLSLSPKETATLSCRASQSVSSYLAWYQQKPGQGPRLLIYGASTRATG
IPARFSGSGSGTEFTLTISSLEPEDFAVYYCKQYNNWP
>V55RF-AGCE01134617.1-igkv |(13675, 13988)|1.53865242746|(0.720,0.567,0.507)|1
SSGDIVMTQAPFSPPVTPGEPASISCKSSQSLLHSNGNTHLHWYLQKPGQSTQLLIYTIS
SKFYGVPNRFSGSRSGTGFILKFSKVEAEDVGVYCCEQGLQG
>V56RF-AGCE01134618.1-igkv |(1446, 1749)|2.19009349675|(0.903,0.620,0.950)|1
SNGEIVLTQSPTSMAVSQGERVTISCMASSSVSTSYLHWYQQKPGSPPRLLVYSTSSLAS
GVPARFSGSGSGTSYTLTISSMEADDAASYYCQQGDSFP
>V57RF-AGCE01147749.1-ighv |(15994, 16303)|2.97048011776|(0.993,0.996,0.982)|1
VHSQVQLVQSGAEVKKPGASMKVSCKASGYTFTDYYMNWVRQAPGKGLEWMGDIDPENGE
TSYAQKFQGRVTMTADTSTSTAYMELRSLRSEDTAVYYCAR
>V58RF-AGCE01147750.1-ighv |(13331, 13640)|2.82169470108|(0.983,0.981,0.891)|1
VQCEVQLVESGGGLVQSGWSLRLSCVASGSTFSDYYMHWVCQAPGKGLEWIGQINPNGRS
TYFTDFVKGRFTISRDNAKNSLYLQMNNLKTEDTAVYYCAG
>V59RF-AGCE01147864.1-ighv |(2102, 2409)|2.18298668865|(0.960,0.974,0.620)|1
VCAEVQLVQSGAEVKRPGESLKISCKASGYSFNSYWISWVRQMPGKGLEWMGIIYPGNSD
TRYSPSFQGHVTISADKSTSTAYLQWSSLKASDAAMYYCA
>V60RF-AGCE01147864.1-ighv |(20911, 21220)|3.0|(1.000,1.000,1.000)|1
VQCEVQLVESGGGLVQPGGSLRLSCAASGFTFSSYWMSWVRQAPGKGLEWVSAINTDGSS
TYYADAVKGRFTISRDNAKNSLYLQMNSLRAADTAVYYCAR
>V61RF-AGCE01147865.1-ighv |(13024, 13338)|2.06694000824|(0.796,0.906,0.581)|1
VLSQVTLKESGPAQVKPTQTLTLTCTFSGFSLSTYGMGVSWIRQPPGKALEWLATIYWDD
DKYYSPSLKSRLTISKDTSKNHVVLTMTNMDPVDAATYYCARE
>V62RF-AGCE01147865.1-ighv |(20279, 20594)|2.67845585936|(0.967,0.962,0.826)|1
VQCEVQLVESGGGLVQPGGSLRLSCAASVFTFSDYHMSWVRQAPGKGLEWVGLIRNKANG
GTAEYAESVKDRFTISRDDSENSLYLQMSSLKPEDTAVYYCTR
>V63RF-AGCE01147866.1-ighv |(3708, 4017)|2.77152296609|(0.914,0.912,0.951)|1
AHSQGQLVQSGAEVKKPGASVKVSCKASGYSFTSYVISWVRQNPRQGLEWMGGIYPGNGG
TNYAQKFQGRVTMTTDKSTSTAYMELSSLRSEDMAMYYCAG
>V64RF-AGCE01147870.1-ighv |(6257, 6566)|2.85201017663|(0.914,1.000,0.990)|1
VQCEVQLVESGGGLVQPGGSLRLSCAASGFTFSNYWMSWVRQAPGKGLEWVSYIRYDGGS
TSYADSVKGRFTISRDNAKNSLFLQMNSLRAEDTAMCYCAG
>V65RF-AGCE01147870.1-ighv |(13126, 13438)|2.5784454507|(0.853,0.814,0.995)|1
VQCDVQLAESGGGLVQPGGSLRLSCAASRFTFSSYDMDWVCQAPGKGLQWVSAVSAGGSN
TYYADSVKGRFTISRDNGKKFLYLQMNSLRAEDTAVYYCAKK
>V66RF-AGCE01147874.1-ighv |(2400, 2706)|2.9768400105|(0.995,0.989,0.993)|1
VQCEVQLVESGGGLAKPGGSLRLSCAASGFTFSSYAMSWVRQAPGKALEWVSAIGTGGST
YYADAVKGRFTISRDNAKNSLFLQMNSLRAEDTAVYYCAR
>V67RF-AGCE01147875.1-ighv |(4611, 4906)|2.6477129125|(0.841,0.943,0.956)|1
VQCEVQLVESGGGLVQPRGSLRLSCAASGFTFSSYAMSWVRQAPGKGLEWVSAISTDGSG
TSYADSVKGRFTISRDNAKNSLYLQMNSLRAEDTAV
>V68RF-AGCE01147944.1-ighv |(862, 1171)|2.99593600205|(1.000,0.996,1.000)|1
VQCEVQLVESGGGLAKPGGSLRLSCAASGFTFSSYYMDWVRQAPGKALEWVSAISTDGSG
TSYADSVKGRFTISRDNAKNSLYLQMSSLRAEDTAVYYCAT
>V69RF-AGCE01147945.1-ighv |(15994, 16303)|2.09555721904|(0.981,0.610,0.936)|1
VHSQVQLVQSGAEVKKPGAPVKVSCKTSGYTFTDYYMHWVRQAPEQGLEWMGRIYPGSGN
TNYAQKFQGRVTMTRDTSTSTAYMELSSLRSEDTAVYYCAR
>V70RF-AGCE01148055.1-ighv |(1634, 1941)|2.15934094228|(0.726,0.687,0.756)|1
VHSQVQMVQSGPELKQPGPSVRVSCKASGYTFNSYAINWVGQVPGQGLEGMGWINTYTGK
PTYAQGFTGRFVFSMDTSISTAYLQISSLKAEDTAVYYCV
>V71RF-AGCE01148057.1-ighv |(4263, 4572)|2.96160565256|(0.997,0.968,1.000)|1
VQCEVQLVESGGGLAKPGGSLRLSCAASGFVFSSYHMHWVRQAPGKGLEWVSFISSDGGS
TYYADSVKGRFTISRDNAKNSLYLQMSSLRAEDTAVYYCAR
>V72RF-AGCE01148067.1-ighv |(2196, 2505)|2.96164947362|(1.000,0.999,0.967)|1
VQSQVQLVQSGAEVKKPGASVKVSCKASGYTFTSYYMNWVRQAPGQGLEWMGWINPYNGN
TGYAQKFQGRVTMTVDKSTSTAYMELSSLRSEDTAVYYCAK
>V73RF-AGCE01148231.1-ighv |(5899, 6208)|2.09348257348|(0.906,0.895,0.602)|1
VCAEVQLMQSGAEVKRPGESLKISCKASGYSFNSYWIGWVRQMPGKGLEWMGMIYPGDSD
TRYSPSFQGHITISADKSTSTAYLQWSSLKASDAAMYYCAR
>V74RF-AGCE01026517.1-trbv |(47848, 48149)|1.67575695419|(0.539,0.698,0.535)|-1
AMSAIELVPEHQTVTVSLGDPATLRCSMKGEAITNYYINWYRKTQGNTMTFIYREKDIYG
PGFKDRFQGEIDPEKDQAVLEILAASERDEGSYYCASD
>V75RF-AGCE01026519.1-trav |(24104, 24394)|2.18054203176|(0.694,0.805,0.737)|-1
GTNSNSVKQTDQVIISEGASVTMNCTYTAMGYPTLFWYVQYPNKPLQFLQEETMENSKNF
GARNIKDKNSPIAKHSVQVSDSAMYYCLLRDTVLR
>V76RF-AGCE01026519.1-trav |(29879, 30165)|1.86619412635|(0.580,0.735,0.739)|-1
VSAANNEVQQSPQDLTVQEGEFITINCSYSVGLTSLQWLQQHPGGGIVSLFTLSSEKKKN
GRLTATINLQEKHSSLHITASQPRDSAIYICAV
>V77RF-AGCE01026520.1-trav |(23771, 24058)|1.88925169254|(0.601,0.776,0.855)|-1
ISSQELEQSPQSWIIQEGENLTINCRSSKTLYALYWYKKKYGEGLIFLMMLQKGGEEKSH
EKITAKLDEKKQQSSLHITASQPSHTGIYLCGAD
>V78RF-AGCE01026520.1-trdv |(67373, 67673)|2.69974057968|(0.974,0.937,0.852)|-1
SSMAQTVTQSQPEMSVQEAETVTLNCTYDTSNSNYYLFWYKQPPSRQMILIIRQEGFKQQ
NATENRFSVNFQKAAKSFSLKISDSQLGDTAMYFCAYR
>V79RF-AGCE01026520.1-trdv |(76513, 76813)|2.75611570659|(0.932,0.882,0.954)|-1
FSIAQRVTQSESEMSVQEAETVTLNCTYDSSDSDYYLFWYKQPPSRHMILIIRQEAYKQQ
NATENRFSVNFQKAAKSFSLKISDSQLGDTAMYFCAYR
>V80RF-AGCE01026521.1-trav |(22968, 23292)|2.20979406797|(0.793,0.867,0.650)|-1
VNSQQKNDNQQVKQNTPFLSVQEGELSILNCDYTNNMFDYFLWYKKYPAEGPAILMSISS
VTNQNIDGRFTVFLNKSAKHLSLHIAASQPGDSAVYLCAANAQCSP
>V81RF-AGCE01026522.1-trav |(3924, 4211)|2.48431592771|(0.904,0.898,0.761)|-1
LSGEDQVTQSPEALRLQEGDSSSLNCSYTVGNFGGLLWYRQDPGKGPEFLFILYSAGEEK
QKERLKATLTKKESFLRITAPKPEDSATYLCAVQ
>V82RF-AGCE01026522.1-trav |(15303, 15602)|2.81669575519|(0.955,0.889,0.997)|-1
VSSKQEVTQIPAALSVPEGESLVFNCSFTDSAIYYLQWFRQDPGKGLTSLLLIQSSQREQ
TSGRLNASLDKSSRYSTLHIAASQPGDSATYLCAVRHS
>V83RF-AGCE01026522.1-trav |(25090, 25393)|1.56755055972|(0.582,0.500,0.525)|-1
IQVEQSPPDLILQEGANYTLWCNFSTSVNNVQWFRQNPWGQLINLFYIPSGTKQNGRLSA
TTVSTERYSLLHISSSQTTDSAIYFCAVVPQCSPGTCSL
>V84RF-AGCE01026522.1-trav |(67327, 67617)|2.52619314055|(0.857,0.829,0.844)|-1
TIIDAKTTQPTSMDCAEGRAANLPCNHSTISGNEYIHWYRQSYSQEPQYVIHGLKNNETN
EMASLIIAEDRKSSILILPHATLRDTAVYYCIVRV
>V85RF-AGCE01026522.1-trav |(73912, 74209)|1.99544761609|(0.845,0.562,0.864)|-1
GTRAQSVTQLDGHITVSEGAPLKLRCNYSYSTTPYLFWYVQYPSQSLQLLLKDLTGATQV
KGIKGFEAEFRKSETSFHLRKPSAHVSDTAVYFCAAS
>V86RF-AGCE01026527.1-trav |(1820, 2116)|2.88284034555|(0.962,0.973,0.949)|-1
VNSQQGEEEPQTLSIQEGENAIINCSYKTSITSLQWYRQDSNRGLTQLILIRSNEREKHS
GRLRFMLDTSMKSSSLFIAAAQAADTAAYFCATEAQC
>V87RF-AGCE01026527.1-trav |(7054, 7345)|2.90853117661|(0.995,0.977,0.947)|-1
RTYGDSVTQTEGPVTLPEGAALTLNCTYQSSYSVFLFWYVQYLDKEPQLLLKSSENQETD
SRGFQASHVKSDSSFRLEKPSVQLSDSAVYYCALR
>V88RF-AGCE01026527.1-trdv |(10273, 10576)|2.92806187285|(0.969,0.991,0.970)|-1
SSMAQKVTQAQTEISVVEKEDVTLDCVYETSDTTYYLYWYKQPSAREMIFLIRQNSFNEQ
NEISGRYSGNFQKSTSSFSLTIAASQVIDSAVYFCALSE
>V89RF-AGCE01026529.1-trav |(3178, 3469)|2.86106460747|(0.972,0.915,0.988)|-1
VWSQQKEVEQNPGSLSVPEGAIASLSCTYSNRAFQYFMWYRQYSRKGPELLTFIYSSDKK
EDGRFTAQLNKSSQYISLFIRDSQPSDSATYLCAM
>V90RF-AGCE01026530.1-trbv |(4836, 5154)|1.67113806227|(0.603,0.608,0.501)|-1
QSVTQLDGQVTVSEGAPVLLKCNYSSSVSAVYLFWYVQYPNQGLHFLLKYVSGPTLVKGI
KGFEAEIKKSESSFHLKKSSVHVSDAAEYFCAVSDTVPETAGEL
>V91RF-AGCE01026530.1-trav |(8602, 8899)|2.88894535923|(0.985,0.969,0.943)|-1
DARAQSVTQPDIHITVSEGASLELRCNYSYGATPYLFWYVQSPGQGLQLLLRYFSGDTLV
QGIKGFEAEFKRSQSSFNLRKPSVHWSDAAEYFCAVS
>V92RF-AGCE01026530.1-trav |(21106, 21396)|2.835463541|(0.920,0.956,0.978)|-1
VNGENVEQHPSTLSVQVGDSSVINCTYSDSASNYFPWYKQELGKGPRLIIDIRSNVDKRK
DGRMTVLLNKAAKHFSLHITDTQPGDSALYFCAAG
>V93RF-AGCE01026530.1-trav |(40762, 41065)|2.9100682612|(0.972,0.959,0.980)|-1
VWSQQKVEQNSGPLNVPEGVIASLNCTYSDRGSQSFYWYRQYPGKSPELLMSVYSSGNED
GRFTAQLNRASQYVSLLIRDSQLSDSATYLCAVSTRCSP
>V94RF-AGCE01026530.1-trbv |(45429, 45753)|1.74543175952|(0.572,0.638,0.554)|-1
TRAQSVTQLDGQVTVSEGAPVLLKCNYSSSVTVYPFWYVQYPNQGLHFLLKYVSGPTLVK
GIKGFQAEIKKSENSFHLKKSSAHVSDAAEYFCAVSDTVPETAGEL
>V95RF-AGCE01026531.1-trav |(478, 766)|2.9651161971|(0.989,0.978,0.999)|-1
VWSQQKEVEQDPGPFNVPEGTTVAFNCTYSNSASQYFFWYRQDPRKGPKLLMSVYSSGNE
DGRFTAQLNRASQYVSLLIRDSQLSDSATYLCAV
>V96RF-AGCE01026534.1-trav |(4915, 5231)|2.0573509858|(0.933,0.862,0.615)|-1
QSVAQPEDRVTVAEGNPLTVKCTYSVSGTPYLFWYVQYPNQGLQFLLKYITGDNLVKGSC
GFEAEFNKSQTSFHLKKPSALVSDSASYFCAVRDTVMGAAGGA
>V97RF-AGCE01026534.1-trav |(23755, 24045)|2.96304239695|(0.976,0.998,0.992)|-1
MSSGEDVEQSRFLSVQEGDSVVMNCTYTDSSSSYLYWYKQEPGASLQLLAYILSNTDMKQ
DQRLTVQLDKKNKHLSLHVAEAQTGDSAIYFCAES
>V98RF-AGCE01026534.1-trav |(44840, 45134)|2.63746130221|(0.837,0.942,0.966)|-1
GISGDSVVQTEGEVLLSEGDSLTVNCSYESTGYPSLFWYVQYPGKGPELLLKATKGNDKG
SNKDFEAIYRTETTSFHLEKGSVRESDSAVYFCALS
>V99RF-AGCE01026534.1-trav |(47485, 47775)|2.5860651454|(0.821,0.931,0.919)|-1
SGKNQVEQSPQSLVILEGKNCTLQCNYTVTPFNNLRWYKQNAGKGPITLMFMTFSENTKS
NGRYTATLDANTKQSSLYITASQLSDSASFICVVS
>V100RF-AGCE01112644.1-igkv |(18051, 18347)|2.11150269628|(0.770,0.801,0.625)|-1
SVASYELTQPRSVSVSPGQTASITCSGDKLGDKYAYWYQQKPGQAPVLVIYQDSKRPSGI
PERFSGSNSGNTATLTISGTQAVDEADYYCQVPHSST
>V101RF-AGCE01112648.1-iglv |(492, 795)|2.95361205453|(0.989,0.980,0.985)|-1
FVTSYELTQPHSVSVAPGQTARITCGGNNIGGKYTYWYQQKSGQSPVLVIYRDNNRPSGI
PERFSGSNSGNTATLTISGVQAGDEADYYCQVWDSSSNH
>V102RF-AGCE01112648.1-iglv |(8719, 9022)|2.9538099056|(0.990,0.968,0.998)|-1
SVVSSAMTQEPAVSVALGQTARITCQGGGIGTYSANWYQQKPGQAPVLVIYDNNNRPSGI
PDRFSGSSSGNTASLTITGAQVEDEADYYCGSWDSSGTH
>V103RF-AGCE01112652.1-iglv |(287, 590)|2.58404535324|(0.941,0.778,0.969)|-1
SATSYELTQPHSVSVAPGQTARITCGGNNIGRKNVHWYQQKSGQAPVLVIYNDNNRPSGI
PERFSGSNSGNTATLTISGVQAGDEADYYCQVWDSSTDH
>V104RF-AGCE01112674.1-iglv |(4938, 5247)|2.89892729297|(0.993,0.940,0.978)|-1
SWAQSVLTQPPSASGAPGQRVTISCSGSSSNIGNNYANWYQQLPGKAPKLLIYGNSNRPS
GSPDRFSGSKSDTSATLAITGLQSADEADYYCETWDSSLNA
>V105RF-AGCE01112675.1-iglv |(2837, 3138)|2.03626660335|(0.802,0.804,0.592)|-1
SLSQPVLTQPPSTSASLGASVTLTCTLSSGYSNYAVDWYQQRPDKGPRFVMRVGTSGIVG
SKGDGIPDRFSVSGSGLNRYLTIKNIQEEDESDYYCGS
>V106RF-AGCE01134619.1-igkv |(15805, 16120)|1.99535645362|(0.921,0.673,0.741)|-1
AYGDIVMTQSPDSLAVSLGERVTVNCKSSQSLLYFNNKNYLAWYQQKPGQDPKLLISWAS
SRPAEVPDQFSGSGSGTDFTLTINSLQAEDVGLYYCQQYYSFP
>V107RF-AGCE01134619.1-igkv |(32675, 32987)|2.92963465422|(0.968,0.972,0.992)|-1
TYGDIVMTQSPGSLAVSLGERVTINCKSSQSLLSSSKNYLAWHQQKPGQAPKQIIVWAST
RVSGVPDRYSGSGSGTDFTLTISSLQAEDVAVYYCQQFYSAP
>V108RF-AGCE01134619.1-igkv |(44281, 44572)|2.35671522393|(0.744,0.888,0.842)|-1
NTVLTQSPALLSASLRDTIFMSCSANQSISDYLTWYQQKPGQPPKILVYDADNLYSGVSS
RFSGIQSGTNFILTISSVEADDAATYYCQQDYAIP
>V109RF-AGCE01134619.1-igkv |(59305, 59593)|2.40967561292|(0.820,0.761,0.845)|-1
TTLTQSPTLVSVTPGDKVTISCKASQDIDNDIYWYQQKPGEAPIFIIQEATTLVSGIPPR
FSGSGYGTDFTLTINNIELEDAAYYFCQQDDNFP
>V110RF-AGCE01135277.1-iglv |(31, 340)|2.97164868712|(0.983,1.000,0.990)|-1
CWAQSVLTQPPSVSGNPGQRVTISCSGSSSNIGSSYVNWYQQLPGTAPKLLIYDSNQRPS
GVSDQFSGSTSGNSASLTITGLQSADEADYYCQSYDSNLKA
>V111RF-AGCE01135286.1-iglv |(6543, 6850)|2.0782757453|(0.788,0.848,0.595)|-1
SNSQAVVTQEPSLTVSPGGTVTLTCASSTGTVTSSNYPCWIQQKPGQAPRTLIYNTNSKY
SWTPARFSGSLLGGKAALTLSGAQPEDEAEYYCLLYYSGA
>V112RF-AGCE01147916.1-ighv |(5261, 5570)|2.5387035354|(0.902,0.911,0.782)|-1
AHSQMQLVQSEAEVKKPGASVKVSCKASGYTFTYHYMHWVRQAPGQGLEWMGWIMPYNGN
TNYAQKVEGRVTITRDTSMSTIYMELRSLRSEDTAVYYCAR
>V113RF-AGCE01147919.1-ighv |(4216, 4525)|2.98867205249|(0.999,1.000,0.990)|-1
AHSQVQLVQSGAEVKKPGASVKISCKASGYTFTSYSMHWVQQAPGQGLEWIGYINTNTGG
TNYAQKFQGRVTMTRDTSTSTAYMELSSLKSEDTAVYYCAR
>V114RF-AGCE01147923.1-ighv |(7327, 7634)|2.97432417086|(0.986,0.991,0.998)|-1
VLSQVQLQESGPGLVKPSDTLSLTCAVSGYSISSGYWWSWIRQPPGKALEWIGSIYYSGS
AYYNPSLKSRVTISTDMSKNQFSLRMSSVTAADTAVYYCA
>V115RF-AGCE01147939.1-iglv |(7498, 7807)|2.85659415562|(0.985,0.968,0.921)|-1
VDSETVVTQEPSYLVSPGGTVTLTCGLSSGSVSTSHYPSWYQQTPGQAPQMLIYSTNTRP
SGVPDRFSGSILGNKAALTIKGAQADDETDYYCMLYMGSGI
>V116RF-AGCE01148076.1-ighv |(262, 572)|2.64540719328|(0.841,0.981,0.930)|-1
LSKVQVQLQQWGPGLVKPSETLSLTCAVYGYFISSDYWWSWIRQPPGKGLEWIGRISYIG
STYYNPSLKSRVTLSTDTSKSQFSLRLSSVTTADTVVYYCA
>V117RF-AGCE01148081.1-ighv |(431, 740)|2.55811167889|(0.987,0.768,0.978)|-1
VQSQVQLVQSGAEVKKPGASVKVSCKTSGYTFTNYYMYWVRQAPGQGLEWMGWIYPGNGN
TKYAQNFQGRVTMTADKSTSTAYMELSSLRSEDTTVYYCAR
>V118RF-AGCE01148188.1-ighv |(110, 419)|2.96508424741|(0.998,0.971,0.999)|-1
VQCEVQLVESGGGLAKPGGSLRLSCAASGFTFSDYWMGWVRQAPWKGLEWVGEINHNGGS
TYYADSVKGRFTISRDNAKNSLYLQMNSLRAEDTAVYYCAR
>V119RF-AGCE01148199.1-ighv |(2012, 2325)|2.95382541375|(0.998,0.999,0.962)|-1
VQCEVQLVESGGGLAQPGGSLRLSCAASGFTFSNYWMNWVCQAPGKGLEWVGRIKSKADG
GTAEYTASVKGRFTISRDDSKNMLYLQMRSLKTEDTAVYYCA
>V120RF-AGCE01148346.1-igkv |(2421, 2731)|2.07725628837|(0.663,0.704,0.741)|-1
SLSQPVLTQSPSASAALGASVKLTCTLSSGHSNYAIAWHQQQPGKAPRYVMKLTGDGSYN
KGDGIPDRFSGSSSGADRYLTISNLRSEDEADYYCQTWDTG
>V121RF-AGCE01148386.1-ighv |(210, 517)|2.99596800026|(1.000,0.998,0.998)|-1
VQCEVQLVESGGGLVKPGGSLRLSCAASGFTLSEYGMHWVRQAPGKGLEWVSFISYNGGY
IHYADSVKGRFTISRDNAKNSLYLQMSSLRAEDTAVYYCA
>V0RF-AACZ03015560.1-igkv |(51593, 51911)|2.54790505013|(0.968,0.759,0.982)|1
AYGDIVMTQSPDSLAVSLGGRATINCKSSQSILYSSNNKNYLAWYQQKPGQPPKLLIYWA
STRQSGVPDRFSGSGSGTDFTLTISSLQAEDVAVYYCQQHYSAP
>V1RF-AACZ03015560.1-igkv |(63266, 63554)|2.40201012694|(0.832,0.736,0.879)|1
TTLTQSPAFVSATPGDKVTISCKASQDIDDDMNWYQQKPGEAAIFIIQEATTLVSGIPPR
FSGSGYGTDFTLTINNIESEDAAYYFCLQDDNFP
>V2RF-AACZ03050973.1-trgv |(700, 1013)|2.80263515099|(0.997,0.951,0.900)|1
SQKSSNLEGRMKSVTRPTGSSAEITCDLIVINAVYIHWYLHQEGKSPQRLLYYDVSNSRD
VLESGLSLGKYYTHTPRRWSWILRLQNLIENDSGVYYCATWD
>V3RF-AACZ03050974.1-trav |(13446, 13755)|1.69580713845|(0.544,0.614,0.558)|1
RMKSVTRPTGSSAVITCDLPVENAGYTHWYLHQEGKAPQRLLYYDSYNSRVVLESGISQE
KYHTYASTGKSLKFILENLIERDSGVYYCATWDRHSDSDLC
>V4RF-AACZ03053974.1-trbv |(14398, 14698)|2.8770082676|(0.985,0.992,0.918)|1
LTEPEVTQTPSHQVTQMGQEVILRCVPISNHLYFYWYRQILGQKVEFLVSFYNNKISEKS
EIFDDQFSVERPDGSNFTLKIRSTKLEDSAMYFCASSE
>V5RF-AACZ03053974.1-trbv |(26630, 26943)|2.25146883023|(0.889,0.989,0.637)|1
PIDTEVTQTPKHLVMGMTNKKSLKCEQHMGHRAMYWYKQKAKKPPELMFVYSYKKLSINE
SVPSRFSPECPNSSLLNLHLHALQPEDLALYLCASSQDTALQ
>V6RF-AACZ03053974.1-trbv |(34490, 34786)|2.92993047006|(0.992,0.953,0.991)|1
PVEAGVTQTPRYLIKARGQQVTLSCSPISGHRSVSWYQQTPGQGLQFLFEYFSETQRNKG
NFPGRFSGRQFSNSRSEMNVSTLELGDSALYLCASSL
>V7RF-AACZ03053974.1-trbv |(41734, 42031)|2.99593600205|(1.000,1.000,0.996)|1
PVNAGVTQTPKFQVLKTGQSMTLQCAQDMNHNSMYWYRQDPGMGLRLIYYSVGEGTTDKG
EVPDGYNVSRLNKREFSLRLESAAPSQTSVYFCASSE
>V8RF-AACZ03053975.1-trbv |(1894, 2207)|2.88794173299|(0.996,0.998,0.918)|1
PMEMGVTQTPRHLVMGMTNKKSLKCEQHLGHNAMYWYKQSAKKPLELMFVYNFKEQTENN
SVPSRFSPECPNSSHLFLHLHALQPEDSALYLCASSQDTALQ
>V9RF-AACZ03053976.1-trbv |(3094, 3391)|2.96428751647|(0.975,0.998,0.995)|1
PVNAGVTQSPKFRVLKTGQSMTLQCAQDMNHNYMYWYQQDPGMGLRLIHYSAGEGTTAKG
EVPDGYNVSRLNTQNFLLRLESAAPSQTSVYFCATSE
>V10RF-AACZ03053977.1-trbv |(2980, 3277)|2.99193200206|(0.999,0.998,0.995)|1
PLDTAVSQTPKYLVTQMGKKESLKCEQNLGHNAMYWYKQDSKKFLKTMFIYSNKEPILNE
TVPNRFSPDSPDKAHLNLHINSLELGDSAVYFCASSQ
>V11RF-AACZ03053977.1-trbv |(6432, 6729)|2.96765257659|(0.998,0.982,0.989)|1
PMEMGVTQTPRHLVMGMTNKKSLKCEQHLGHNAMYWYKQSAKKPLELMFVYSLEERVENN
SVPSRFSPECPNSSHLFLHLHTLQPEDSALYLCASSQ
>V12RF-AACZ03053977.1-trbv |(14911, 15208)|2.97853206285|(0.998,0.992,0.989)|1
PVNAGVTQTPKFRVLKTGQSMSLLCAQDMNHEYMYWYRQDPGMGLRLIHYSVGEGTTAEG
EVPDGYNVSRLKKQNFLLGLESAAPSQTSVYFCASSY
>V13RF-AACZ03053979.1-trbv |(398, 698)|2.95682541375|(0.999,1.000,0.963)|1
HTGAGVSQSPSNKVTEKGKDVELRCDPISGHTALYWYRQSLGQGLEFLIYFQGNSAPDKS
GLPSDRFSAERTGGSVSTLTIQRTQQEDSAVYLCASSL
>V14RF-AACZ03053981.1-trbv |(4476, 4773)|2.9503601679|(0.989,0.977,0.985)|1
PVIAGITQAPTSQILAAGRSMTLRCTQDMRHNAMYWYRQDLGLGLRLIHYSNTAGTTGKG
EVPDGYSVSRANTDDFPLTLASAVPSQTSVYFCASSD
>V15RF-AACZ03053981.1-trbv |(8075, 8375)|2.97188623715|(0.999,0.999,0.976)|1
HTGAGVSQTPSNKVTEKGKDVELRCDPISGHAALYWYRQSLGQGPEFLIYFQGTGAADDS
GLPNDRFFAVRPEGSVSTLKIQRTEQGDSAVYLCASSL
>V16RF-AACZ03053981.1-trbv |(12907, 13203)|2.4415681151|(0.894,0.790,0.821)|1
PVEAGVTQSPTHLIKTRGQQVTLRCSPISGHSSVSWYQQALGQGHQFISRYANELRRSEG
NFPNRFSGRQFHDYCSEMNVSALELGDSALYLCARSL
>V17RF-AACZ03053981.1-trbv |(15649, 15945)|2.94631770439|(0.996,0.967,0.987)|1
PVDSGVTQTPKHLITATGQQVTLRCSPRSGDLSVYWYQQSLDQGLQFLIQYYNGEESAKG
NILERFSAQQFPDLHSELNLSSLELGDSALYFCASSV
>V18RF-AACZ03053981.1-trbv |(31375, 31675)|2.89548729347|(0.984,0.978,0.941)|1
LSEAEVAQSPRYKITEKSQAVAFWCDPISGHATLYWYRQILGQGPELLVQFQDESVVDDS
QLPKDRFSAERLKGVDSILKIQPAELGDSAMYLCASSL
>V19RF-AACZ03053981.1-trbv |(48721, 49018)|1.91105942791|(0.936,0.510,0.995)|1
HRDAGITQSPRHKITETGRQVTLMCHQTWSHSYMFWYRQDLGHGLRLIYYSAAADITDKG
EVPDGYVVSRSKTENFPLTLESATRSQTSVYFCASSE
>V20RF-AACZ03053983.1-trbv |(4545, 4845)|2.75354005187|(0.976,0.949,0.873)|1
LTEAGVAQSPRYKIIEKRQSVAFWCNPISGHATLYWYQQILGQGPKLLIQFQNNGVVDDS
QLPKDRFSAERLKGVDSTLKIQPAKLEDSAMYLCASSL
>V21RF-AACZ03053983.1-trbv |(21546, 21843)|2.89656301427|(0.999,0.999,0.922)|1
PVNAGVTQTPKFQVLKTGQSMTLQCAQDMNHKYMYWYRQDPGMGLRLIHYSVGAGITDKG
EVPNGYNVSRSNTEDFPLSLVSAAPSQTSVYFCASSY
>V22RF-AACZ03053983.1-trbv |(25762, 26062)|2.9898400105|(0.998,1.000,0.992)|1
HTGAGVSQSPRYKVAKRGRDVALRCDSISGHVTLYWYRQTLGQGSEVLTYFRSDAQRDKS
GRPSGRFSAERPERSVSTLKIQRTEQGDSAVYLCASSL
>V23RF-AACZ03053983.1-trbv |(33686, 33982)|2.97282001102|(0.994,0.988,0.991)|1
PVDAGVTQSPTHLIKTRGQQVTLRCSPQSGHNTVSWYQQALGQGPQFIFQYYREEENGRG
NFSPRFSGRQFPNYSSELNVNALELDDSALYLCASSL
>V24RF-AACZ03053983.1-trbv |(40132, 40429)|2.96330822856|(0.993,0.991,0.980)|1
PVNAGVTQTPKFRILKIGQSMTLQCAQDMNHNYMYWYRQDPGMGLKLIYYSVGAGITDKG
EVPNGYNVSRSTTEDFPLRLESAAPSLTSVYFCASSY
>V25RF-AACZ03053984.1-trbv |(12230, 12526)|2.96461205453|(0.990,0.994,0.981)|1
PVDAGVTQSPTHLIKTRGQQVTLRCSPISGHTSVSWYQQALGQGPQFIFQYYEKEERGRG
NFPDRFSACQFPNYSSELNVNALLLGDSALYLCASSL
>V26RF-AACZ03053986.1-trbv |(8, 308)|2.99193600205|(0.996,1.000,0.996)|1
HTGAGVSQSPRYKVTKRGQDVTLRCDPISGHVALYWYRQALGQGPEFLTYFNYEAQPDKS
GLPNDRFSAERPEGSNSTLTIQRTEQRDSAMYLCASSL
>V27RF-AACZ03053987.1-trbv |(5059, 5356)|2.62844254041|(0.993,0.893,0.855)|1
PMNAGVTQTPKFHILKTGQSMTLQCAQDMNHGYMSWYRQDPGMGLRLIYYSAAAGTTDKG
EVPNGYNVSRLNTEDFPLRLVSAAPSQTSVYFCASSY
>V28RF-AACZ03053988.1-trbv |(2703, 3003)|2.96997252412|(0.996,0.995,0.980)|1
HTGAGVSQSPRYKVTKRGQDVTLRCDPISSHATLYWYQQALGQGPEFLTYFNYEAQPDKS
GLPNDRFSAERPEGSNSTQTIQRTEQRDSAMYLCASSL
>V29RF-AACZ03053988.1-trbv |(11127, 11423)|2.98886400565|(0.997,0.992,1.000)|1
PVDAGVTQSPTHLIKTRGQHVTLRCSPISGHTSVSWYQQALGQGPQFIFEYYEKEERGRG
NFPDRFSARQFPNYSSELNVNALLLGDSALYLCASSL
>V30RF-AACZ03053988.1-trbv |(18445, 18742)|2.97588400513|(0.993,0.995,0.988)|1
PVNAVVTQTPKFQVLKTGQSMTLQCAQDMNHDCMSWYRQDPGMGLRRIHYSVAAGITDKG
EVPDGYNVSRSNKEDLPLRLESAAPSQTSVYFCASSY
>V31RF-AACZ03053988.1-trbv |(23071, 23371)|2.96576801985|(0.992,0.989,0.985)|1
HTGAGVSQSPRYKVTKRGQDVALRCDPISGHVSLFWYQQALGQGPEFLTYFRNEAQLDKS
GLPSDRFFAERPEGSVSTLKIQRTQQEDSAVYLCASSL
>V32RF-AACZ03053988.1-trbv |(31286, 31582)|2.93443897096|(0.994,0.957,0.989)|1
PVEAGVTQSPTHLIKTRGQQVTLRCSPISGHTSVYWYQQALGLGLQFLLWYDEGEERNRG
NFPRRFSGRQFPNYSSELNVNALELEDSALYLCASSL
>V33RF-AACZ03053988.1-trbv |(40506, 40806)|2.9362535536|(0.988,0.955,0.998)|1
HADTGVSQDPSHKITKRGQNVTFRCDPISEHNRLYWYRQTLGQCPEFLTYFQNEAQLEKS
RLLSDRFSAERPKGSFSTLEIQHTEQGDSAIYLCASSL
>V34RF-AACZ03053988.1-trbv |(47037, 47334)|2.94724064902|(0.997,0.959,0.997)|1
SVAAGVIQSPRYLIKEKRETATLKCYPIPRHDTVYWYQQGPGQDPQFLISFYEKMQSDKG
SIPDRFSAQQFSDYHSELNMSSLELGDSALYFCASSS
>V35RF-AACZ03053988.1-trbv |(55269, 55566)|2.8783775175|(0.992,0.987,0.920)|1
HMDAGITQSPRHKVTETGTPVTLRCHQTENHRYMYWYRQDPGHGLRLIHYSYDVKDTDKG
EVSDGYSVSRSKTEDFLLTLESTTSSQTSVYFCAISE
>V36RF-AACZ03053989.1-trbv |(6507, 6807)|2.49135422101|(0.964,0.734,0.986)|1
LIEAGVVQSPRYKIIEKKQPVAFWCNPISGHNTLYWYWQNLGQGPELLIRYENEEAVDDS
QLPKDRFSAERLKGVDSTLKIQPAELGDSAVYLCASSL
>V37RF-AACZ03053989.1-trbv |(12103, 12403)|2.98783600705|(0.999,0.994,0.995)|1
HTDAGVIQSPRHEVTEMGQEVTLRCKPISGHNSLFWYRQTMMQGLELLIYFNNNVPIDDS
GMPKDRFSAKMPNASFSTLKIQPSEPRDSAVYFCASSL
>V38RF-AACZ03053991.1-trbv |(6886, 7186)|2.2646924282|(0.866,0.955,0.648)|1
LIDAGVTQTPRHKVTEMGQEVTMRCQPILGHNTVFWYRQTMMQGLELLAYFRNRAPLDDS
GMPKDRFSAEMLDATLATLKIQPSEPRDSAVYFCASGL
>V39RF-AACZ03053991.1-trbv |(13707, 14007)|2.87094120885|(0.997,0.917,0.983)|1
HIEAGVTQFPSHSVIEKGQTVTLRCDPVSGHDNLYWYRRVMGNEIKFLLHFVKESKQDES
GMPNNRFLAERTGGTYSTLKVQPAELEDSGVYFCASSQ
>V40RF-AACZ03053991.1-trbv |(18826, 19123)|2.8591025444|(0.957,0.934,0.971)|1
HGDAKVIQNPRYQVTQFEKPVTLGCSQNLNHNVMYWYQQKSSQAPKLLFHYYDKDFNNEA
DTPDNFQSRRPNTSFCFLDIRSPGLGDAAMYLCATSR
>V41RF-AACZ03053991.1-trbv |(23811, 24111)|2.95094800078|(0.982,0.985,0.984)|1
SPGEEVTQTPKHLVRGEGQKAKLYCAPIKGHSYVFWYQQVLKKEFKFLISFQNENVFDKT
GMPKERFSAKCLSNSPCSLEIQATKLEDSAVYFCASSQ
>V42RF-AACZ03053991.1-trbv |(41750, 42046)|2.19214700479|(0.943,0.634,0.933)|1
LSNAGVMQNPRHLVRRRGQEARLRCSPVKGHNHVYWYRQLPEEGLKFMVYLQKENIIDES
GMPKERFSAEFPKEGPSILRIQQAVRGDSAAYFCASS
>V43RF-AACZ03053991.1-trbv |(44878, 45175)|2.90838789991|(0.971,0.998,0.945)|1
TVDGGITQSPKYLFRKEGQNVTLNCEQNLNHDAMYWYRQDPGQGLRLIYYSQIVNDFQKG
DIAEGYSVSREKKESFPLTVTLAQKNPTAFYLCASSI
>V44RF-AACZ03053992.1-trbv |(7444, 7744)|2.45926429354|(0.929,0.809,0.822)|1
STDTKVTQRPRLLVKASEQKAKMDCVPIKGHSYVYWYRKKLEEELKFLIYFQNEELIQKA
EIINERFLAQCPKNSSCTLEIQSTESGDTALYFCASSK
>V45RF-AACZ03053992.1-trbv |(16518, 16818)|2.96496034001|(0.996,0.988,0.982)|1
SFHAKVTQTPGHLVKGKGQKTKMDCTPEKGHVFVYWYQQNQNKEFMLLISFQNEQVLQET
EMHKKRFSSQCPKNTPCSLAILSSEPGDTALYLCASSQ
>V46RF-AACZ03053992.1-trbv |(27256, 27554)|2.36367232608|(0.989,0.988,0.689)|1
SMDADVTQTPRNRITKTGKRIMLECSQTKGHDRMYWYRQDPGLGLRLIYYSFDVKDINKG
EISDGYSVSRQAQAKFSLSLESAIPNQTALYFCATSD
>V47RF-AACZ03053992.1-trbv |(41278, 41575)|2.98066005261|(0.996,0.987,0.998)|1
LMEADIYQTPRYLVIGTGKKIALECSQTMGHDKMYWYQQDPGMELHLIHYSYGVNSTEKG
DLSSESTVSRIRTEHFPLTLESARPSHTSQYLCASSE
>V48RF-AACZ03053994.1-trbv |(21067, 21364)|2.91736552535|(0.990,0.964,0.968)|1
PLEAQVTQNPRYLITVTGKKLTVTCSQNMNHDYMSWYRQDPGLGLRQIYYSVNVEVIDKG
DVPEGYNVSRKEKRNFPLILESPSPNQTSLYFCASSL
>V49RF-AACZ03053994.1-trbv |(26364, 26661)|2.98598400013|(0.996,0.994,0.996)|1
LVDVKVTQSSRYLVKRMGEKVFLECVQDMDHENMFWYRQDPGLGLRLIYFSYDVKMKEKG
DIPEGYSVSREKKERFSLILESASTNQTSMYLCASSL
>V50RF-AACZ03053995.1-trbv |(9498, 9801)|2.50121807762|(0.932,0.755,0.932)|1
SVFSAVISQKPSRDICQRGTSLTIQCQVNSQVTMMFWYRQQPGQSPTLIATANQGSEATY
ETGFVIDKFPISRPNLTFSTLTVSNMSPEDSSIYLCSVE
>V51RF-AACZ03066999.1-trbv |(221141, 221441)|2.3366534182|(0.887,0.765,0.784)|1
SMDTKVTQRPRLLVKANEQKAKTDCVPIKRHSYVYWYHKTLEEELKFLIYFQNEEIIQKA
EIINERFSAQCPQNSPCTLEIQSTESGDTAWYFCANSK
>V52RF-AACZ03066999.1-trbv |(230067, 230367)|1.84940488732|(0.804,0.503,0.858)|1
CFHAKVTQTPGYLVKGKGRKTKMYYTPENRHTFVCWYQQNQNKEFMFLISFQNEQVLQEM
EMHKKRFSSQCPKNPPCSLAILSSEPGDTALYLCATSP
>V53RF-AACZ03067000.1-trbv |(17891, 18182)|2.95080401921|(0.986,0.979,0.986)|1
LMEAEIYQTPRHRVIGTGKKITLECSQTMGHDKMYWSRSRNGITPHPPFLWVNSTEKGDL
SSESTVSRIRIERFPLTLESASPSHTSQYLCASSE
>V54RF-AACZ03067007.1-trbv |(7737, 8040)|2.97559608|(0.995,0.985,0.996)|1
SVFSAVISQKPSRDICQRGTSMTIQCQVDSQVTMMFWYCQQPGQSMTLIATANQGSEATY
ESRFVIDKFPISRPNLTFSTLTVSNRRPEDSSIYLCSVE
>V55RF-AACZ03070936.1-igkv |(7433, 7733)|3.0|(1.000,1.000,1.000)|1
ARCDIQMTQSPSSLSASVGGRVTITCRASQGISNNLNWYQQKPGKTPKLLIYAASSLQSG
IPSRFSDSGSGTDYTLTISSLQPEDFATYYCQQSDSTP
>V56RF-AACZ03095312.1-trav |(40528, 40815)|2.77072055687|(0.932,0.924,0.916)|1
VRSQQPVQSPQAVILREGEDAVINCSSSKALYSVHWYRQKHGEAPVFLMMLLKGGEQKGH
DKISASFNEKKQQSSLYLMASQLSYSGTYFCGAE
>V57RF-AACZ03095312.1-trdv |(49328, 49639)|1.65591519571|(0.541,0.627,0.519)|1
LLQVSSGDQSCYFFSSTASSMSQRVIQSQPAISTQEGETVKLDCSYKTNIVCYISYWYKR
SPNGKIIFLIYQQTDAETNMTQSQYSVSFQKATKTIQLIISS
>V58RF-AACZ03095314.1-trav |(457, 747)|2.9889000027|(0.994,0.997,0.998)|1
VSSEDKVVQSPLSLVVHEGDTVTLNCSYEVTNFQSLLWYKQEKKAPTFLFMLTSSGIEKK
SGRLSSILDKKELFSILNITATQTGDSAIYLCAVE
>V59RF-AACZ03095317.1-trdv |(27773, 28074)|2.75604920814|(0.990,0.894,0.925)|1
SGMAQTVTQSQPEMSVQEAETVTLSCTYDTSESNYYLFWYKQPPSRQMILVIRQEAYKQQ
NATENRFSVNFQKAAKSFSLKISDSQLGDTAMYFCAFM
>V60RF-AACZ03095317.1-trav |(36941, 37243)|2.989900005|(0.995,0.995,1.000)|1
FSMAQTVTQTQPEMSVQEAETVTLSCTYDTSESDYYLFWYKQPPSRQMILVIRQEAYKQQ
NATENRFSVNFQKAAKSFSLKISDSQLGDAAMYFCAYRS
>V61RF-AACZ03095319.1-trav |(17030, 17318)|2.97821230726|(0.998,0.984,0.997)|1
LSGELKVEQNPLFLSTQEGKNYTIYCNYSTTSDRLYWYRQDPGKSLESLFVLLSNGAVKQ
EGQLMASLDTKARLSTLHITAAVHDLSATYFCAV
>V62RF-AACZ03095319.1-trav |(27959, 28249)|1.56469312446|(0.736,0.514,0.583)|1
GTSSNSVKQTGQITVSEGASVTMNCTSASTGYPTPFWYVQYPSKPLQLLQRETMENSKNF
GGRNIKDKNSPVVKYSVQVSDSAVYYCLLGDTVLK
>V63RF-AACZ03095319.1-trav |(33732, 34018)|1.86857181503|(0.628,0.584,0.672)|1
VSAARNEVEQSPQDLTAQEGELITINCSYSVGINALHWLQQHPGGGIVSLFMLSSGKKKH
GRLIATINIQEKHSSLHITASHPRDSAIYICAV
>V64RF-AACZ03097606.1-trav |(3590, 3899)|2.2333363615|(0.875,0.912,0.644)|1
TIMYLVIGTAGQSLEQPSEVTAVEGAIVQINCTYQTSGFYGLSWYQQHDGGAPTFLSYNA
LDGLEETGHFSSFLSRSDSYGYLLLQKLQMKDSASYFCAVR
>V65RF-AACZ03097611.1-trav |(13712, 14009)|2.38910456739|(0.988,0.701,0.981)|1
GLRAQSVAQPEDQVKVAEGNPLTVKCTYSVSGNPYLFWYVQYPNRGLQFLLKYITGDNLV
KGSYGFEAEFNKSQTSFHLKKPSALVSDSALYFCAVR
>V66RF-AACZ03097612.1-trav |(9441, 9731)|2.99899600001|(1.000,0.999,1.000)|1
MSRGEDVEQSLFLSVREGDSSVINCTYTDSSSTYLYWYKQEPGAGLQLLTYIFSNMDMKQ
DQRLTVLLNKKDKHLSLRIADTQTGDSAIYFCAES
>V67RF-AACZ03097613.1-trav |(2901, 3189)|2.98793200206|(0.995,0.999,0.994)|1
VKSQKIEQNSEALNIQEGKTATLTCNYTNYSPAYLQWYRQDPGRGPVFLLLIRENEKEKR
KERLKVTFDTTLKQGVFHITASQPADSATYLCAL
>V68RF-AACZ03097613.1-trav |(17275, 17562)|2.96868003481|(0.991,0.983,0.995)|1
ANGENQVEHSPHFLGPQQGDVASMSCTYSVSRFNNLQWYRQNTGMGPKHLLSMYSAGYEK
QKGRLNATLLKNGSSLYITAVQPEDSATYFCAVD
>V69RF-AACZ03097613.1-trav |(45730, 46024)|2.9949000027|(0.996,0.999,1.000)|1
GINGDSVVQTEGQVLLSEGDSLIVNCSYETTQYPSLLWYVQYPGEGPQLLLKAMKANDNG
RNKGFEATYRKETTSFHLEKDSVQESDSAVYFCALS
>V70RF-AACZ03097613.1-trav |(59820, 60113)|2.99899600001|(1.000,0.999,1.000)|1
GSGKNQVEQSPQSLIILEGKNCTLQCNYTVSPFNNLRWYKQDTGRGPVSLTIMTFSENTK
SNGRYTATLDADTKQSSLHITASQLSDSASYICVVS
>V71RF-AACZ03097613.1-trav |(75553, 75841)|2.99593600205|(1.000,0.996,1.000)|1
VWSQRKEVEQDPGPFNVPEGATVAFNCTYSNSASQSFFWYRQDCRKEPKLLMSVYSSGNE
DGRFTAQLNRASQYISLLIRDSKLSDSATYLCAV
>V72RF-AACZ03097613.1-trav |(86767, 87064)|2.95328751647|(1.000,0.980,0.977)|1
TVRAQSVTQPDIHITVSEGASLELRCNYSYGATPSLFWYVQSPGQGLQLLLKYFSGDTLV
QGIKGFEAEFKRSQSSFNLRKPSVHWSDAAEYFCAVG
>V73RF-AACZ03097614.1-trav |(12294, 12584)|2.96080866856|(0.992,0.995,0.975)|1
VNGENVEQHPSTLSVQEGDGAVIKCTYSDSASNYFPWYKQELGKGPQLIIDIHSNMGEKK
DQRIAVTLNKTAKHFSLHITETQPEDSAVYFCAAS
>V74RF-AACZ03097614.1-trav |(31772, 32063)|2.96876801985|(0.993,0.990,0.986)|1
VWSQQKEVEQNSGPLSVPEGAIVSLNCTYSDRRSQSFFWYRQYSGKSPELIMSIYSNGDE
EDGKFTAQLNKASQYVSLLIRDSQPSDSATYLCAV
>V75RF-AACZ03097614.1-trav |(38270, 38567)|2.96496800026|(0.987,0.989,0.989)|1
GTRAQSATQLDSHVSVSEGALVLLRCNYSSSVPPYLFWYVQYPNQGLQLLLKYTTGATLV
KGINGFEAEFKKSETSFHLTKPSAHVNDAAEYFCAVS
>V76RF-AACZ03097617.1-trav |(9971, 10264)|2.05867816584|(0.979,0.996,0.571)|1
VSRGESVGLHLPTLSVQEGDNSIINCAYSNSASDYFIWYKQESGKGPQFIIDIRSNMDKR
QGQRVTVLLNKTVKHLSLQIAATQLGDSAVYFCAEN
>V77RF-AACZ03097618.1-trav |(4827, 5130)|2.99798400013|(1.000,0.998,1.000)|1
PGIAQKITQTQPGMFVQEKEAVTLDCTYDTSDQSYGLFWYKQPSSGEMIFLIYQGSYDQQ
NATEGRYSLNFQKARKSANLVISASQLGDSAMYFCAMKE
>V78RF-AACZ03097618.1-trav |(21644, 21938)|3.0|(1.000,1.000,1.000)|1
RTRGDSVTQMEGPVTLSEEAFLTINCTYTATGYPSLFWYVQYPGEGLQLLLKATKADDKG
SNKGFEATYRKETTSFHLEKDSVQASDSAVYFCALS
>V79RF-AACZ03097619.1-trav |(24003, 24296)|2.99071202074|(0.993,0.999,0.999)|1
VWSQQKEVEQDPGPLSVPEGAIASLNCTYSNSAFQYFMWYRQYSRKGPELLMYTYSSDNK
EDGRFTAQVDKSSKYISLFIRDSQPSDSATYLCAMS
>V80RF-AACZ03097619.1-trav |(37053, 37344)|1.68070258178|(0.951,0.711,0.605)|1
GTRAQSVTQLDSQVFEEAPVELRCNYSSSVSVYLFWYVQYPNQGLQLLLKYLSGSTLVKG
INGFEAEFKKSETSFHLRKPSVHISDAAEYFCAVS
>V81RF-AACZ03097619.1-trav |(56042, 56329)|2.99385601037|(1.000,0.994,1.000)|1
VNSQQGEEDPQALSIQEGENAIMNCSYKTSINNLQWYRQNSGRGLVHLILIRSNEREKHS
GRLRVTLDTSKKSSSLLITASRAADTASYFCATD
>V82RF-AACZ03097619.1-trdv |(66115, 66418)|2.97580001921|(0.990,0.997,0.989)|1
SSMAQKVTQAQTEISVVEKEDVTLDCVYETRDTTYYLFWYKQPPSGELVFLIRRNSFDEQ
NEISGRYSWNFQKSTSSFNFTITASQVVDSAVYFCALSE
>V83RF-AACZ03097619.1-trav |(99749, 100036)|2.93226990764|(0.994,0.996,0.950)|1
LSGEDQVTQSPEALRLQEGESSSLNCSYTVSGLRGLFWYRQDPGKGPEFLFALYSAGEEK
EKERLKATLTKKESFLHITAPKPEDSATYLCAVQ
>V84RF-AACZ03097619.1-trav |(111650, 111949)|2.21345774004|(0.871,0.625,0.974)|1
VSSKQEVTQIPAALSVPEGDNLVLNCSFTDSAIYNLQWFRQDPGKGLTSLLLIQSSQREQ
TSGRLNASLDKSSGRSTLYIAASQPGDSATYLCAVRHS
>V85RF-AACZ03097621.1-trav |(4277, 4574)|1.87545879833|(0.744,0.551,0.721)|1
VRGIQVEQSPPDLILQEGANSTLRCNFSASVNNLQWFHQNPWGQLINLFYIPSGTKQNGR
LSATTVATERYSLLYISSSQTTDSGVYFCAVEPQCSP
>V86RF-AACZ03097622.1-trdv |(8097, 8397)|2.71681664187|(0.972,0.853,0.949)|1
SSVAQKVTQAQSSVSMPVRKAVTLNCLYEASWWSYYIFWYKQLPSKEMVFLIRQGSGEQN
AKSGRYSVNFKKAAKSVALTISALQLEDSAKYFCAFWE
>V87RF-AACZ03097622.1-trav |(17372, 17662)|2.05942273954|(0.969,0.581,0.962)|1
VSSILNVEQSPQSLHVQEGDSTNFTCSFTSSNFYALHWYRWETAKSPEALFVMTLNGDEK
KKGRISATLNTKEGYSYLYIKGSQPEDSATYLCAF
>V88RF-AACZ03097624.1-trav |(2805, 3104)|2.14411484778|(0.973,0.951,0.618)|1
VNGQQVMQIPQYQHVQEGEDFTTYCNSSTTLSNIQWYKQRPGGHPVFLIQLVKSGEVKKQ
KRLTFQFGEAKKNSSLHITATQTTDVGTYFCAGHSAPQ
>V89RF-AACZ03097624.1-trav |(14019, 14309)|2.23355290136|(0.912,0.632,0.974)|1
TIIDAKTTQPTSMDCAEGRAANLPCNHSTISGNEYIHWYRQIHSQGPQYIIHGLKNNETN
EMASLIITEDRKSSTLILPHATLRDTAVYYCIVRV
>V90RF-AACZ03097899.1-ighv |(18928, 19237)|2.86125694504|(0.976,0.963,0.931)|1
TYSQVQLVQSGHEVKQPGASVKVSCKASGYSFTTYGMNWVRQAPGQGLEWMGWFNTYTGN
PTYAQGFTGRFVFSMDTSVSTAYLQISSLKAEDTAMYYCAR
>V91RF-AACZ03097899.1-ighv |(75199, 75508)|3.0|(1.000,1.000,1.000)|1
VQCEVQLLESGGGLVQPGGSLRLSCAASGFTFSSYWMHWVRQAPGKGLEWVSRINSDGSS
TSYADSVKGRFTISRDNAKNTLYLQMNSLRAEDTAVYYCTR
>V92RF-AACZ03097899.1-ighv |(83090, 83405)|3.0|(1.000,1.000,1.000)|1
VQCEVQLVESGGGLVQPGGSLRLSCAASGFTFSGSAMHWVRQASGKGLEWVGRIRSKANS
YATAYAASVKGRFTISRDDSKNTAYLQMNSLKTEDTAVYYCAR
>V93RF-AACZ03097900.1-ighv |(7950, 8265)|2.98683600705|(0.996,1.000,0.991)|1
VQCEVQLLESGGGLVQPGGSLRLSCAASGFTFSDYYMDWVRQAPGKGLEWVGRIRNKANS
YTTEYAASVKGRFTISRDDSKNSLYLQRNSLKTEDTAVYYCTR
>V94RF-AACZ03097900.1-ighv |(23404, 23719)|2.97768136355|(0.982,1.000,0.998)|1
VQCEVQLVESRGGLVQPGGSLRLSCAVSGFTFSDYYMSWVRQAPGKGLEWVGFIRNKANG
GTTEYTTSVKGRFTISRDDSKSITYLQMNSLKTEDTAVYYCSR
>V95RF-AACZ03097900.1-ighv |(27981, 28295)|2.40600116717|(0.971,0.759,0.876)|1
VLSQVTLKESGPALVKPTETLTLTCTFSGFSLSTSGMRVSWIRQPPGKALEWLARIDWDD
DKYYSTSLKTRLTISKDTSKNQVVLTMTNMDPVDTATYYCARI
>V96RF-AACZ03097900.1-ighv |(37008, 37317)|2.7029151854|(0.979,0.981,0.829)|1
VQSQVQLVQSGAEVKKPGSSVKVSCKVSGGTFSSYAISWVRQAPGQGLEWMGVIIPILGT
ANYAQKFQGRVTITADESTSTAYMELSSLRSEDTAVYYCAT
>V97RF-AACZ03097900.1-ighv |(75733, 76039)|3.0|(1.000,1.000,1.000)|1
VQCEVQLVESGGGLVQPGGSLRLSCAASGFTFSSYHMSWVRQAPGKGLEWVSVIYSGGST
YYADSVKGRFTISRDNSKNTLYLQMNSLRAEDTAVYYCAR
>V98RF-AACZ03097900.1-ighv |(92730, 93036)|3.0|(1.000,1.000,1.000)|1
VQCEVQLVESGGGLVQPGGSLRLSCAASGFTFSSYAMHWVRQAPGKGLEWVSLIYSGDST
YYADSVKGRFTISRDNSKNTLYLQMGSLRAEDTAVYYCAR
>V99RF-AACZ03097904.1-ighv |(3428, 3734)|2.98980401921|(0.999,0.992,0.999)|1
VLSQLQLQESGPGLVKPSETLSLTCTVSGGSISSYYWSWIRQPPGKGLEWIGYIYYSGSA
YYNPSLKSRVTISVDTSKNQFSLKLSSVTAADTAVYYCAR
>V100RF-AACZ03097905.1-ighv |(2226, 2538)|2.76951501389|(0.987,0.856,0.993)|1
VLSQLQLQESGPGLVKPSQTLSLTCTVSGGSISSGSYYWSWIRQPAGKGLEWIGNIYYSG
STYYNPSLKSRVTISVDTSKNQFSLKLSSVTAADTAVYYCAR
>V101RF-AACZ03097906.1-ighv |(13610, 13916)|3.0|(1.000,1.000,1.000)|1
VQCEVQLVESGGGLVQPGGSLRLSCAASGFTVSSYHMSWVRQAPGKGLEWVSVIYSGGST
YYADSVKGRFTISRDNSKNTLYLQMNSLRAEDTAVYYCAR
>V102RF-AACZ03097906.1-ighv |(27525, 27832)|2.67264509707|(0.992,0.988,0.813)|1
VCAEVQLVQSGAEVKKPGESLKISCKGSGYSFTSYWIGWVRQMPGKGLEWMGIIYPGDSD
TRYSPSFQGQVTISADKSISTAYLQWSSLKASDTAMYYCA
>V103RF-AACZ03097906.1-ighv |(49257, 49572)|2.99594800078|(0.997,0.999,1.000)|1
VQCEVQLVESGGGLVQPGRSLRLSCTASGFTFGDYAMSWIRQAPGKGLEWVGFIRSKAYG
GTTEYAASVKGRFTISRDDSKSIAYLQMNGLKTEDTAVYYCTR
>V104RF-AACZ03097906.1-ighv |(64529, 64835)|2.06899806685|(0.986,0.576,0.997)|1
VQCEDQLVESGGGLVQPGGSLRPSCAASGFAFSSYVLHWVRRAPGKGLEWVSAIGTGGDT
YYADSVMGRFTISRDNAKKSLYLQMNSLIAEDMAVYYCAR
>V105RF-AACZ03097906.1-ighv |(72260, 72569)|2.9774040992|(0.987,0.997,0.994)|1
AHSQVQLVQSGAEVKKPGASVKVSCKASGYTFTSYTISWLRQAPGQGLEWMGVISPSDGS
TSYAQKFQGRVTMTRDTSTSTVYMELSSLRSEDTAVYYCAR
>V106RF-AACZ03097906.1-ighv |(76385, 76694)|2.98896000066|(0.997,0.998,0.994)|1
AYSQMQLVQSGAEVKKPGSSVKVSCKASGYTFTYRYLHWVRQAPGQALEWMGWITPYNGN
TNYAQKFQDRVTITRDRSMSTAYMELRSLRSEDSAVYYCAR
>V107RF-AACZ03097910.1-ighv |(1033, 1344)|2.99389600501|(1.000,0.999,0.995)|1
VQCEVQLVESGGGVVQPGGSLRLSCAASGFTFDDYAMHWVRQAPGKGLEWVSLISWDGGS
TYYADSVKGRFTISRDNSKNSLYLQMNSLRAEDTALYYCAKD
>V108RF-AACZ03097912.1-ighv |(17400, 17707)|2.96619965751|(1.000,0.995,0.974)|1
VQCEVQLVESGGGLVQPESSLKLSCAASGFTFSSYAMNWVRQAPGKGLEWVAHIWNDGSQ
KYYADSVKGRFTISRDNSKSMLYLQMDSLKAEDTAMYYCT
>V109RF-AACZ03097916.1-ighv |(3845, 4154)|2.98237212748|(1.000,0.989,0.994)|1
VLSQVQLQESGPGLVKPSETLSLTCAVSGYSISSGYYWGWIRQPPGKGLEWIGSIYHSGS
TYYNPSLKSRVTISVDTSKNQFSLKLSSVTAADTAVYYCAR
>V110RF-AACZ03097919.1-ighv |(14915, 15224)|2.68288365583|(0.913,0.848,0.942)|1
VQCEVQLVESGGGLVQPGGSLRLSCAASGFTFSNSDTNWVHQAPGKGLELVSGVSWNGSR
MHYADSVKGRFIISRDNSRNSLYLQTNSLRAEDTAVYYCVR
>V111RF-AACZ03098145.1-ighv |(4162, 4471)|2.98410021834|(0.988,1.000,0.997)|1
VQCQVQLVESGGGVVQPGRSLRLSCAASGFTFSSYGMHWVRQAPGKGLEWVAFISYDGSN
KHYADSVRGRFTISRDNSKNTLYLQMNRLRAEDTAVYYCAR
>V112RF-AACZ03098146.1-ighv |(6178, 6490)|2.71811735377|(1.000,0.833,0.991)|1
VLSQVQLQESGPGLVKPSQTLSLTCAVSGGSITSGYYYWSWIRQPPGKGLEWIGGIYTSG
STYYNPSLKSRVTISVDTSKNQFSLKLSSVTAADTAVYYCAR
>V113RF-AACZ03098148.1-ighv |(5185, 5491)|1.80866399446|(0.852,0.774,0.536)|1
VLSQVQLQQWGAGLVKPSETLSLTCAVYGGSFSDYYWGWVRQPPGKGLEWIGHINYGGST
NYNPSLKSRVTISVDKSKNQFSLKLSSVTAADTAVYYCAR
>V114RF-AACZ03098176.1-ighv |(689, 998)|2.90855005294|(0.994,0.963,0.960)|1
VQCQVRLVESGGGVVQPGRSLRLSCAASGFTFSSYGMHWVRQAPGKGLEWVAFIQYDGSN
KYYADSVKGRFTISKDNSKNTLYLQMNSLRAEDTAVYYCAR
>V115RF-AACZ03102011.1-ighv |(12521, 12836)|2.53059530405|(0.964,0.983,0.751)|1
VQCEVQLVESGGGLVQPGGSLRLSCAASGFTFSDHYMSWVRQAQGKGLELVGLIRNKANS
YTTEYAASVKGRFTISREDLKNTLYLQMSSPKTEDLAVYYCAR
>V116RF-AACZ03102011.1-ighv |(35465, 35774)|2.30150809181|(0.887,0.854,0.698)|1
AQSRVQLVQSGAEVKKPGASVKVSCKASGYTFTSYCMHWVRQAHAQGLEWMGLVCPSDGS
TSHAQKFQGRVTITRDTSMSTAYMELSSLRSEDMAMYYCVR
>V117RF-AACZ03106490.1-ighv |(5495, 5804)|2.98894800078|(0.996,0.994,0.999)|1
VQCEVQLVESGGGLVQPGGSLRLSCAASGFTFSSYWMHWVRQAPGKGLVWVSRINSDGSS
TSYADSLKGQFTISRDNAKNTLYLQMNSLRAEDMAVYYCTR
>V118RF-AACZ03107095.1-ighv |(2793, 3107)|2.64530318241|(0.946,0.845,0.902)|1
VLSQVTLKESGPALVKPTETLTLTCTLSGFSLSTSGMGMSWIRQPPGKALEWLAHIFSND
KKSYSTSLKNRLIISKDTSKSQVVLTMTNMDPVDTATYYCAWR
>V119RF-AACZ03126842.1-igkv |(17937, 18255)|2.35585713695|(0.985,0.684,0.991)|1
SSGDIVMTQTPLSLPVTPGEPASISCRSSESLLDTDDEHTYLNWYLQKPGQSPQLLIYEV
SNRASGVPDRFSGSGSGTDFTLKISRVEAEDVGVYYCMQALQTP
>V120RF-AACZ03126842.1-igkv |(27906, 28206)|2.98070483945|(1.000,1.000,0.982)|1
ARCDIQMTQSPSSLSASVGDRVTITCRASQGISNNLNWYQQKPGKTPKLLIYAASSLQSG
IPFRFSDSGSGTDYTLTISSLQPEDFATYYCQQSDSTP
>V121RF-AACZ03127129.1-iglv |(13910, 14207)|2.95737067436|(0.998,0.964,1.000)|1
SVASYELTQPSSVSVSPGQTARITCSGDVLAKNYARWFQQKPGQAPVLVIYKDSERPSGI
PERFSGSSSGTTVTLTISGAQVEDEADYYCYSAADNN
>V122RF-AACZ03127129.1-iglv |(32581, 32884)|2.99192000218|(0.998,0.994,1.000)|1
SEASYELTQPPSVSVSPGQTARITCSGDALPKQYAYWYQQKPGQAPVLVIYKDSERPSGI
PERFSGSSSGTTVTLTISGVQAEDEADYYCQSADSSGTY
>V123RF-AACZ03127131.1-iglv |(7169, 7472)|2.98050011724|(0.998,0.996,0.987)|1
SVTSYELTQPPSVSVAPGQTARITCGGNNIGSKAVHWYQQKPGQAPVLVIYYDSDRPSGI
PERFSGSNSGNTATLTISRVEAGDEADYYCQVWDSSSKH
>V124RF-AACZ03127131.1-iglv |(15097, 15400)|2.99288400513|(1.000,0.995,0.998)|1
SVVSSELTQDPAVSVALGQTVRITCQGDSLRSYYASWYQQKPGQAPVLVIYGNNNRPSGI
PDRFSGSSSGNTASLTITGAQAEDEADYYCSSLDSSGNH
>V125RF-AACZ03127135.1-iglv |(12358, 12661)|2.92616849053|(1.000,0.941,0.999)|1
SEASYELTQPPSVSVSLGQTARITCSGEALPKKYAYWYQQKPGQAPVLVIYKDSERPSGI
PERFSGSSSGTIVTLTISGVQAEDEADYYCQSADSSGTY
>V126RF-AACZ03127138.1-iglv |(6948, 7251)|2.16973086263|(0.891,0.942,0.613)|1
SATSYELTQPHSVSVATAQTARITCGGNNIGSKAVHWYQQKPGQDPVLVIYSNSNQPSGI
PERFSGSNPGNTATLTISRVEAGDEVDYYCQVWDSSSDH
>V127RF-AACZ03127139.1-iglv |(1837, 2140)|2.59663022684|(0.970,0.936,0.802)|1
SATSYELTQPHSVSVATAQMARITCGGNNIGSKAVHWYQQKPGQDPVLVIYSDSNRPSGI
PERFSGSNSGNTATLTISRVEAGDEVDYYCQVWDSSSDH
>V128RF-AACZ03127139.1-iglv |(22125, 22435)|2.9455031224|(0.991,0.991,0.966)|1
SWAQSALTQPPSVSRSPGQSVTISCTGTSSDVGGYNYVSWYQQHPGKAPKLMIYDVSKRP
SGVPDRFSGSKSGNTASLTISGLQAEDEADYYCCSYAGSYS
>V129RF-AACZ03127139.1-iglv |(41415, 41718)|2.99696400065|(1.000,0.997,1.000)|1
SEASYELTQPPSVSVSPGQTARITCSGDALPKQYAYWYQQKSGQAPVLIIYEDSKRPSGI
PERFSGSSSGTMATLTISGAQVEDEADYYCYSTDSSGNH
>V130RF-AACZ03127139.1-iglv |(48899, 49191)|1.50402605639|(0.500,0.841,0.542)|1
SVASYELTQPLSVSVALGQTARITCGGNNIGSKNVHWYQQKPGQAPVLVIYRDSNRPSGI
PERFSGSNSGNTATLTISRAQAGDEAITVRCGTAA
>V131RF-AACZ03127139.1-iglv |(52418, 52728)|2.67730953531|(0.995,0.998,0.811)|1
SWAQSALTQPPSASGSPGQSVTISCTGTSSDIGGYNYVSWYQQHPGKAPKLMIYEVSKRP
SGVPDRFSGSKSGNTASLTVSRLQAEDEADYYCSSYAGSNN
>V132RF-AACZ03127142.1-iglv |(7297, 7595)|1.83584513127|(0.717,0.575,0.643)|1
LCALPVLTQPPSASASLGASVKLTCTLSSEHSTYTIEWYQQRPGRSPQYIMKVKSDGSHS
KGDGIPDRFMGSSSGADRYLTISNLQSDDEAEYHCGE
>V133RF-AACZ03127143.1-iglv |(3944, 4240)|2.9929000027|(1.000,0.996,0.997)|1
SVASYELTQPPSVSVSPGQTASITCSGDKLGDKYAYWYQQKSGQSPVLVIYQDSKRPSGI
PERFSGSNSGNTATLTISGTQAMDEADYYCQAWDSST
>V134RF-AACZ03151853.1-igkv |(10232, 10550)|2.37688494744|(0.976,0.698,0.969)|1
TSGDIVMTQTPLSLPVTPGEPASISCRSSQSLLDSDDGNTYLDWFLQKPEQSPQLLIYEV
SNWASGVPDRFSGSGSGTDFTLKISRVEAEDVGVYYCMQALQTP
>V135RF-AACZ03151853.1-igkv |(38017, 38335)|1.60696003627|(0.843,0.601,0.593)|1
SSEDIVMTQTPLSLPVTPGEQASISCRSCQSLLDSDDGNTYLDLYLQKPGQSPQLLIYTL
SYRASGVSDRFSGRGSGNDFTLKISRVEAEDVEVYYCMQHIEFP
>V136RF-AACZ03151853.1-igkv |(48491, 48784)|3.0|(1.000,1.000,1.000)|1
ARCDIQMTQSPSSLSASVGDRVTITCRASQSISNYLSWYQQKPGKAPKLLIYDASTLQSG
VPSRFSGSGSGTDFTLTISSLQPEDFATYYCQRGYG
>V137RF-AACZ03151853.1-igkv |(70778, 71078)|2.96011198542|(1.000,0.965,1.000)|1
ARCDIQLTQSPSSLSASVGDRVTITCQASQDISNYLNWYQQKPGKVPKLLIYSASNLQSG
VPSRFSGSGSGTDFTLTISSLQPEDVATYYCQRTYNAP
>V138RF-AACZ03151853.1-igkv |(99987, 100287)|2.92067408165|(0.982,0.999,0.946)|1
ARCDIQMTQSPSSLSASVGDRVTITCQASQDISNYLNWYQQKPGKAPKLLIYDASNLETG
VPSRFSGSGSGTDFTFTISSLQPEDIATYYYQQYDNLP
>V139RF-AACZ03151853.1-igkv |(122999, 123314)|2.46544078896|(0.960,0.842,0.807)|1
SSGDVVMTQSPLSLPVTLGQPASISCRSSQSLVYSDGNTYLSWIQQRPGQPPRLLIYKVS
NRDSGVPDRFSGSGAGTDFTLKISRVEAEDVGVYYCVQGIQLP
>V140RF-AACZ03151853.1-igkv |(133574, 133889)|2.97554805197|(0.997,0.989,0.990)|1
SSADIVMTQTPLSLSVTPGQPASISCKSSQSLLHSDGNTYLYWYLQKPGQSPQLLIYRVS
NRASGVPDRFSGSGSGTDFTLKISQVEAEDVGVYYCMQGIQLP
>V141RF-AACZ03151853.1-igkv |(146050, 146365)|2.71240530194|(0.994,0.827,0.997)|1
SSGDIVMTQSPLSLPVTPGEPASISCRSSQSLLHSNRYNYLDWYLQKPGQSPQLLIYLGS
NRASGVPDRFSGSGSGTDFTLKISRVEAEDVGVYYCMQALQTP
>V142RF-AACZ03151853.1-igkv |(154335, 154635)|2.98184466791|(1.000,0.983,1.000)|1
TRCDIQMTQSPSSLSASVGDRVTITCWASQGISNYLAWYQQKPGKVPKLLIYAASTLQSG
VPSRFSGSGSGTDFTLTISSLQPEDVATYYCQKYNSAP
>V143RF-AACZ03151853.1-igkv |(190625, 190927)|2.982900005|(0.996,0.996,0.991)|1
SSGDIVMTQTPLSSPVTLGQPASISCRSSQSLVHSDGNTYLSWLQQRPGQPPRLLIYKVS
NRFSGVPDRFSGSGAGTDFTLKISRVEAEDVGVYYCTQA
>V144RF-AACZ03151853.1-igkv |(207246, 207544)|2.39834519042|(0.996,0.700,0.998)|1
SRGEIVLTQSPDFQSVPPKEKVTITCRASQSIGSSLHWYQQKPGQSPKLLIKYASQSISG
VPSRFSGSGSGTDFTLTINSLEAEDAATYYCQQSSSL
>V145RF-AACZ03151855.1-igkv |(12698, 12994)|2.98540816598|(1.000,0.988,0.998)|1
TTGEIVLTQSSATLSLSPGERATLSCRASQSVSSSYLAWYQQKPGQAPRLLIYDASSRAT
GIPDRFSGSGSGTDFTLTISRLEPEDFAVYYCQQYGS
>V146RF-AACZ03151855.1-igkv |(28194, 28494)|2.99398000014|(0.999,0.997,0.998)|1
ARCDIQMTQSPSSLSASVGDRVTITCRASQGISNYLAWFQQKPGKAPKRLIYAASSLQSG
VPSRFSGSGSGTEFTLTISSLQPEDFATYYCLQHNSYP
>V147RF-AACZ03151855.1-igkv |(45639, 45939)|2.99899600001|(1.000,0.999,1.000)|1
ARCDIQMTQSPSSLSASVGDRVTITCRASQGISSWLAWYQQKPGKAPKPLIYAASSLQSG
VPSRFSGSGSGTEFTLTISSLQPEDFATYYCQQYNSYP
>V148RF-AACZ03151855.1-igkv |(60285, 60585)|2.52774717894|(0.944,0.996,0.745)|1
TTGEIVLTQSPATLSLSPGERATLSCRASQSVSSYLAWYQQKPGQAPRLLIYGASNRATG
IPARFSGSGSRTDFTLTISSVEPEDFAVYYCQQYNNQP
>V149RF-AACZ03151857.1-igkv |(4301, 4601)|2.99280401921|(1.000,0.993,1.000)|1
ARCAIQLTQSPSSLSASVGDRVTITCRASQGISNRLNWYQQKPGKAPKLLIYDASSLESG
VPSRFSGSGSGTDFTLTISSLQPEDFATYYCQQFNSYP
>V150RF-AACZ03151857.1-igkv |(10072, 10372)|2.95096883512|(1.000,1.000,0.958)|1
ASCDIQMTQSPSSVSASVGDRVTITCQASQGISSWLAWYQQKPGKAPKLLIYAASSLQSG
VPSRFSGNGSGTDFTLTISSLQPEDFATYYCQQANSFP
>V151RF-AACZ03151858.1-igkv |(2327, 2627)|2.97754104219|(1.000,0.998,0.981)|1
TTGEIVLTQSPATLSLSPGEKATLSCRASQSVSSYLAWYQQKPGQAPRLLIYDASNRATG
ISARFSGSGSGTDFTLTISSLEPEDFAVYYCQQRSNWH
>V152RF-AACZ03151858.1-igkv |(39404, 39704)|2.98221630725|(0.999,0.985,0.999)|1
ARCAIQMTQSPSSLSASVGDRVTITCRASQGISSYLAWYQQKPAKAPKLLIYYASSLQSG
VPSRFSGSGSGTEFTLTISSLQPEDFATYYCQQLNSYP
>V153RF-AACZ03151858.1-igkv |(56994, 57304)|2.05680932583|(0.966,0.950,0.584)|1
ARCAIRMTQSPSSLSASTGDRVTITCRASQGISSYLAWYQQKPGKAPKLLNYAASTLQSG
VPSRFSGSRSGTEFTLTISCLQSEDFATYYCQQYYSYPPTV
>V154RF-AACZ03151979.1-igkv |(10219, 10519)|2.99286400565|(0.995,1.000,0.998)|1
AKCDIQMTQSPSTLSASVGDRVTITCRASQGISSYLNWYQQKPGKAPKLLIYAASTLESG
VPSRFSGSGSGTEFTLTISSLQPDDFATYYCQQYSSTP
>V155RF-AACZ03171037.1-ighv |(18459, 18781)|2.21738298974|(0.766,0.663,0.916)|1
VLSQVTLKESGPVLVKPTETLTLTCTISGFSLSNAGMGVSWIRQPPGKALEWLAHIFWND
EKSYSTSLKSRLTISKDTSKSQVVLTMTNMDPVDTATYYCTRRAQ
>V156RF-AACZ03171037.1-ighv |(42750, 43059)|2.63432321742|(0.960,0.795,0.985)|1
THAQVQLVQSGAEVKKPGATVKISCKASGYTLTELSMHWVRQAPGKRLEWMGGFDPEDGE
TIYAQKFQGRVTMTEDTSTDTAYMELSSLRSEDTAVYYCAT
>V157RF-AACZ03171037.1-ighv |(52793, 53102)|2.99596000066|(1.000,0.997,0.999)|1
VQCEVQLVESGGGLVKPGGSLRLSCAASGFTFSSYAMHWVRQAPEKGLEWVSTISGSGGS
TWYPDSVKGRFTISRDNSKNTLYLQMNSLRAEDTAVYYCAR
>V158RF-AACZ03171037.1-ighv |(63661, 63976)|2.99899600001|(1.000,1.000,0.999)|1
VQCEVQLVESGGGLVKPGGSLRLSCAASGFTFSSYSMNWVRQAPGKGLEWVGFIRTKAKG
GTTEYAASVKGRFTISRDDSKSIAYLQMNSLKTEDTAVYYCTR
>V159RF-AACZ03171037.1-ighv |(86377, 86686)|3.0|(1.000,1.000,1.000)|1
VQCEVQLVESGGGLVQPGGSLRLSCAASGFTFSSYGMHWVRQAPGKGLEWVSYISYDSSY
IYYADSVKGRFTISRDNAKNSLYLQMNSLRAEDTAVYYCAT
>V160RF-AACZ03171037.1-ighv |(116832, 117141)|2.98070483945|(1.000,1.000,0.982)|1
VQCEVQLVESGGGLVQPGGSLRLSCAASGFTFDDYGMSWVRQAPGKGLEWVSLISWDGGS
TYYADSVKGRFTISRDNSKNSLYLQMSSLRAEDTALYYCAR
>V161RF-AACZ03171037.1-ighv |(129850, 130159)|2.99698000014|(1.000,0.999,0.998)|1
AHSQVQLVQSGAEVKKPGASVKVSCKASGYTFTSYDINWVRQATGQGLEWMGWMNPNSGN
TGYAQKFQGRVTMTRDTSISTAYMELSSLRSEDTAVYYCAR
>V162RF-AACZ03171037.1-ighv |(150598, 150907)|2.99199600001|(0.997,0.998,0.997)|1
VQCEVQLVESGGGLVQPGGSLTLSCAASGFTFSSYWMSWVRQAPGKGPEWVANIKKDGSE
KYYADSVKGRFTISRDNAKNSLYLQMNSLRAEDTAVYYCTR
>V163RF-AACZ03171037.1-ighv |(157231, 157541)|1.73406295911|(0.563,0.565,0.785)|1
WRKLDKAWVSLRLSCAASGFTFSSHSTHWVPQAPGKGLQWVSVISGSGSTIYYADSVKGR
FTISRDNTKNSLYLQMNRLRAEDAAAYYSVRDTVRRSQCEP
>V164RF-AACZ03171037.1-ighv |(174851, 175165)|1.90674558861|(0.919,0.811,0.584)|1
VLSQVTLKESGPTLVKPTQTLTLTCTFSGFSLSTSGVGVGWIRQPPGKALEWLALIYSDN
DKRYSPSLKSRLTITKDTSKNQVVLTMTNMDPVDTATYYCAHR
>V165RF-AACZ03171037.1-ighv |(187799, 188108)|2.96800187489|(0.996,1.000,0.974)|1
AHSQVQLVQSGSEVKKPGASVKVSCKASGYTFTSYAMNWVRQAPGQGLEWMGWINTNTGN
PTYAQGFTGRFVFSLDTSVSTAYLQISSLKAEDTAVYYCAR
>V166RF-AACZ03171037.1-ighv |(200692, 201001)|2.98567205249|(0.998,0.999,0.989)|1
VLSQVQLQESGPGLVKPSETLSLTCAVSGGSISSSNWWSWVRQPPGKGLEWIGEIYHSGS
PNYNPSLKSRVTISVDKSKNQFSLKLSSVTAADTAVYYCAR
>V167RF-AACZ03171395.1-trav |(594, 882)|2.98793200206|(0.995,0.999,0.994)|1
VKSQKIEQNSEALNIQEGKTATLTCNYTNYSPAYLQWYRQDPGRGPVFLLLIRENEKEKR
KERLKVTFDTTLKQGVFHITASQPADSATYLCAL
>V168RF-AACZ03173011.1-ighv |(4916, 5238)|2.25964124772|(0.925,0.649,0.951)|1
VLSQVTLMESGPALVKPTETLTLTCTLSGFSLSTSGMGMSWIRQPPGKALEWLAHIFSND
KKSYSTSLKNRLIISKDTSKSQVVLTMTNMDPVDTATYYCAWRAQ
>V169RF-AACZ03176953.1-iglv |(7473, 7783)|2.03106828491|(0.807,0.656,0.700)|1
SLSQPVLTQPSSHSASSGASVRLTCTLSSGFSVGDFWIRWYQQKPGNPPRYLLYYHSDSN
KGQGSGVPSRFSGSNDASANAGILRVSGLQPEDEAYYYCGT
>V170RF-AACZ03176953.1-iglv |(11235, 11544)|2.64920908736|(0.997,0.800,0.996)|1
SWAQSVLTQPPSVSAAPGQKVTISCSGSSCNIGNNYVSWYQQLPGTAPKILIYDNNKRPS
GISDRFSGSKSGTSATLGITGLQTGDEADYYCGTWDSSLSA
>V171RF-AACZ03176953.1-iglv |(41685, 41995)|2.51492014994|(0.988,0.768,0.943)|1
SLSQPVLTQPTSLSASPGASARLTCTLRSGINLGSYRIYWYQQKPGSPPRYLLRYKSDSD
KQQGSGVPSRFSGSKDASTNAGILVISGLQSEDEADYYCMI
>V172RF-AACZ03176953.1-iglv |(46517, 46826)|2.99899600001|(1.000,1.000,0.999)|1
SWAQSVLTQPPSASGTPGQRVTISCSGSSSNIGSNTVNWYQQLPGTAPKLLIYSNNQRPS
GVSDRFSGSKSGTSASLAISGLRSEDEADYYCAAWDDSLSG
>V173RF-AACZ03176965.1-iglv |(24589, 24892)|2.31540778985|(0.805,0.888,0.696)|1
SWAQSALTQPPFVSGAPGQSVTISCTGTSSDVGDYDHVFWYQKRLSTTSRLLIYNVNTRP
SGISDLFSGSKSGNMASLTISGLKSEVEANYHCSLYSSS
>V174RF-AACZ03176987.1-iglv |(5895, 6205)|2.99067605248|(1.000,0.991,1.000)|1
SWANFMLTQPHSVSESPGQTVTISCTRSSGSIASDYVQWYQQRPGSAPTTVIYEDNRRPS
GVPDRFSGSIGSSSNSASLTISGLKSEDEADYYCQSYDSSS
>V175RF-AACZ03179884.1-ighv |(12665, 12971)|2.9949000027|(0.996,1.000,0.999)|1
VQCEVQLVQSGGGLVQPGGSLRLSCAGSGFTFSSYAMHWVRQAPGKGLEWVSAIGTGGGT
YYADSVKGRFTISRDNAKNSLYLQRNSLRAEDMAVYYCAR
>V176RF-AACZ03182257.1-ighv |(5938, 6245)|3.0|(1.000,1.000,1.000)|1
AQCEVQLVESGGGLVQPGGSLRLSCAASGFTFSNHYTSWVLQAPGKGLEWVSYISGDRGY
TNYADSVKGRFTISRDNAKNSLYLQMNSLRAEDTAVYYCV
>V177RF-AACZ03015561.1-igkv |(2130, 2430)|2.93682633717|(0.998,0.998,0.950)|-1
AKCDIQMTQSPSTLSASVGDRVTITCRASQGISSWLAWYQQKPGKAPKLLIYKASSLESG
VPSRFSSSGSGTEFTLTISSLQPDDFATYYCQQYSSYP
>V178RF-AACZ03015561.1-igkv |(34244, 34556)|2.94854053568|(0.983,0.997,0.970)|-1
CNGDIVLTQSPASLAVSPGQRATITCRASESVSFLGINLIHWYQQKPGQPPKLLIYQASN
KDTGVPARFSGSGSGTDFTLTINLVEANDTANYYCLQSKNFP
>V179RF-AACZ03015562.1-igkv |(7056, 7356)|3.0|(1.000,1.000,1.000)|-1
TRCDIQMTQSPSSLSASVGDRVTITCRASQGISNYLAWYQQKPGKAPKLLIYYASRLESG
VPSRFSGSGSGTDYTLTISSLQPEDFATYYCQQYNSNP
>V180RF-AACZ03015562.1-igkv |(21131, 21434)|2.97549304411|(1.000,0.996,0.981)|-1
TIGEIVMTQSPATLSLSPGERATLSCRASQSVSSSYLSWYQQKPGQAPRLLIYGASTRAT
GIPARFSGSGSGTDFTLTISSLQPEDFAVYYCQQDYKLP
>V181RF-AACZ03015562.1-igkv |(33603, 33903)|2.99067605248|(1.000,0.991,1.000)|-1
ARCDIQMTQSPSSLSASVGDRVTITCRASQGIRNDLGWYQQKPGKAPKLLIYAASSLQSG
VPSRFSGSGSGTDFTLTISSLQPEDFATYYCLQDYNYS
>V182RF-AACZ03015564.1-igkv |(7726, 8026)|2.99899600001|(1.000,0.999,1.000)|-1
TRCDIQMTQSPSSLSASVGDRVTITCRASQSISNSLAWYQQKPGKAPKLLIYAASRLESG
VPSRFSGSGSGTDYTLTISSLQPEDFATYYCQQYYSTP
>V183RF-AACZ03015754.1-igkv |(14686, 14986)|3.0|(1.000,1.000,1.000)|-1
ARCDIQVTQSPSSLSASVGDRVTITCRTSQGISNGLSWYQQKPGQAPTLLIYAASSLQSG
IPSRFSGSGSGTDFTLTISSLQPEDVATYYCLQDYTTP
>V184RF-AACZ03016034.1-igkv |(14230, 14530)|2.68811517971|(0.996,0.815,1.000)|-1
ARCDIPMTQSPSSLSASVGDRVTITCRASQGISNNLNWYQQKPGKTPKLLIYAASSLQSG
IPSRFSDSGSGTDYTLTISSLQPEDFAAYYCQQSDSTP
>V185RF-AACZ03016143.1-igkv |(754, 1054)|2.88343797113|(0.981,0.932,0.980)|-1
ARCAIQMTQPPSSLFASVGDSVTITCRASQSVTNHWYQQKPGKAPKLLIYRVSSLQMGVP
SRFSGSGSGTDFTLTISSLQPDDVATYYCQQEYTVGVT
>V186RF-AACZ03054006.1-trbv |(3325, 3619)|2.15568164191|(0.809,0.734,0.690)|-1
VRSQTIHQWPATLVQPVGSPLSLECTVEGTSNPNLYWYRQAAGRGLQLLFYSVGIGQISS
EVPQNLSASRPQDRQFILSSKKLLLSDSGFYLCAWS
>V187RF-AACZ03095321.1-trdv |(4778, 5084)|2.92402032645|(0.982,0.968,0.975)|-1
RGMLCDKVTQSSPDQTVASGSEVVLLCTYDAVYSNPDLFWYRIRPDYSFQFVFYGDNSRS
QAADFTQGRFSVKHILTQKAFHLVISPVRTEDSATYYCAF
>V188RF-AACZ03098097.1-ighv |(6348, 6654)|2.93405224805|(0.987,0.990,0.960)|-1
HSQVQLVQSGAEVKKLGASVKVSCKASGYTFTDYFIHWVQQAPGQGLEWMGWINPNSGGT
NYAQKFQSRVTMTRNTSISTAYMELSRLRSDDTAVYYCAR
>V189RF-AACZ03098097.1-ighv |(38713, 39031)|1.78026384138|(0.835,0.528,0.756)|-1
VLSQVQLQQSGPGLVKPSQTLSLTCAISRDSVSSNSAAWNWIRQSPSRGLEWLGRTYYRS
KWYNDYAASVQSRITINPDTSKNQFSLQLNSVTPEDTAVYYCAR
>V190RF-AACZ03098100.1-ighv |(12261, 12570)|2.98567205249|(0.998,0.999,0.989)|-1
VLSQVQLQESGPGLVKPSETLSLTCAVSGGSISSSNWWSWVRQPPGKGLEWIGEIYHSGS
PNYNPSLKSRVTISVDKSKNQFSLKLSSVTAADTAVYYCAR
>V191RF-AACZ03098100.1-ighv |(19369, 19678)|2.99385601037|(1.000,0.994,1.000)|-1
AHSQVQLVQSGAEVKKPGASVKVSCKASGYTFTSYAMHWVRQAPGQRLEWMGWINTGNGN
TKYSQKFQGRVTITRDTSASTAYMELSSLRSEDTAVYYCAR
>V192RF-AACZ03098103.1-ighv |(623, 937)|2.34300053625|(0.940,0.811,0.768)|-1
VLSQVTLKESGPTLVKPTQTLTLTCTFSGFSLSTSGVGVGWIRQPPGKALEWLALIYWDD
DKRYSPSLKSRLTITKDTSKNQVVLTMTNMDPVDTATYYCAHR
>V193RF-AACZ03127313.1-iglv |(14865, 15172)|2.9898720041|(0.994,0.998,0.998)|-1
SWANFMLTQPHSVSESPGQTVTISCTRSSGSIASDYVQWYQQRPGSAPTTVIYEDNRRPS
GVPDRFSGSIDSSSNSASLTISGLKTEDEADYYCQSYDSS
>V194RF-AACZ03127314.1-igkv |(28405, 28711)|1.87017875986|(0.617,0.590,0.825)|-1
SLSQPVLTQSSSASASLGSSVKLTCTLSSGHSSYIIAWHQQQPGKAPRYLMKLEGSGSYN
KGSGVPDRFSGSSSGADRYLTINNLQSEDEADYYCETWGS
>V195RF-AACZ03127321.1-iglv |(54420, 54720)|2.91739010128|(0.985,0.963,0.972)|-1
SLSQLVLTQSPSASASLGASVKLTCTLSSGHSSYAIAWHQQQPEKGPRYLMKLNSDGSHS
KGDGIPDRFSGSSSGAERYLTISSLQSEDEADYYCQTW
>V196RF-AACZ03127321.1-iglv |(122715, 123024)|2.95194425777|(0.996,0.990,0.969)|-1
VDSQTVVTQEPPFSVSPGGTVTLTCGLSSGSVSTSYYPSWYQQTPGQAPRTLIYSTNTRS
SGVPGRFFGSIIGNKAALTITGAQADDESDYYCLLYMGSGI
>V197RF-AACZ03151873.1-igkv |(7769, 8069)|2.99098000014|(0.996,0.998,0.997)|-1
ARCDIQMTQSPSSLSASVGDRVTITCRASQGINNNLNWYQQKPGKTPKLLIYAASSLQSG
IPSRFCDSGSGTDYTLTISSLQPEDFATYYCQQSDGTP
>V198RF-AACZ03151911.1-igkv |(7475, 7775)|2.95253496597|(0.998,0.999,0.961)|-1
ARCDIQMTQSTSSLSASVGDRVTITCRASQGISNNLNWYQQKPGKTPKLLIYAASSLQSG
ILSRFSDSGSGTDYTLTISSLQPEDFAAYYCQQSDSTP
>V199RF-AACZ03171059.1-trav |(889, 1176)|2.2234948042|(0.884,0.641,0.912)|-1
VRSQQPVQSPQAMILREGEDAVVNCSSSKALYSVHWYRQKHGEAPIFLMILLKGGEQKGH
DKISASFNEKKQQSSLYLMASQLSYSGTYFCGAE
>V200RF-AACZ03171126.1-ighv |(3284, 3590)|2.58216430001|(0.955,0.880,0.830)|-1
VLSQVQLQQWGTELLKPSETLSLTCAVYGGSFSGYYWSWIRQPPGKGLEWIGEINHSGST
NYNPSLKSRVTISVDTSKNQFSLKLSSVTAADTAVYYCAR
>V201RF-AACZ03171149.1-trav |(1638, 1925)|2.97478801933|(0.990,0.997,0.988)|-1
VSSEDKVVQSPLSLVVHEGDTVTLNCSYEVTNFQSLLWYKQEKKAPTFLFMLTSSGIEKK
SGRLSSILDKKELFSILNTATQTGDSAIYLCAVE
>V202RF-AACZ03171512.1-trav |(590, 893)|2.99289600501|(0.999,0.994,1.000)|-1
PGIAQKITQTQPGMFVQEKEAVTLDCTYDTSDPSYGLFWYKQPSSGEMIFLIYQGSYDQQ
NATEGRYSLNFQKARKSANLVISASQLGDSAMYFCAVRE
>V203RF-AACZ03171676.1-trav |(1205, 1504)|2.14411484778|(0.973,0.951,0.618)|-1
VNGQQVMQIPQYQHVQEGEDFTTYCNSSTTLSNIQWYKQRPGGHPVFLIQLVKSGEVKKQ
KRLTFQFGEAKKNSSLHITATQTTDVGTYFCAGHSAPQ
>V204RF-AACZ03172648.1-ighv |(10152, 10459)|3.0|(1.000,1.000,1.000)|-1
AQCEVQLVESGGGLVQPGGSLRLSCAASGFTFSNHYTSWVLQAPGKGLEWVSYISGDSGY
TNYADSVKGRFTISRDNAKNSLYLQMNSLRAEDTAVYYCV
>V205RF-AACZ03172650.1-ighv |(24637, 24943)|3.0|(1.000,1.000,1.000)|-1
VQCEVQLVQSGGGLVQPGGSLRLSCAGSGFTFSSYAMHWVRQAPGKGLEWVSAIGTGGGT
YYADSVKGRFTISRDNAKNSLYLQMNSLRAEDMAVYYCAR
>V206RF-AACZ03173117.1-ighv |(1009, 1323)|2.31161210768|(0.947,0.695,0.902)|-1
VLSQVTLKESGPVLVKPTETLTLTCTLSGFSLSTSGMGMSWIRQPPGKALEWLAHIFSND
KKSYSTSLKNRLIISKDTSKSQVVLTMTNMDPVDTATYYCAWR
>V207RF-AACZ03177116.1-iglv |(1182, 1492)|2.99099200002|(0.997,0.998,0.996)|-1
SWAQSALTQPASVSGSPGQSITISCTGTSSDVGGYNAVSWYQQHPGKAPKLMIYDVNKRP
SGVSNRFSGSKSGNTASLTISGLQAEDEADYYCSSYRSGGT
>V208RF-AACZ03178854.1-igkv |(8334, 8634)|2.99280401921|(1.000,0.993,1.000)|-1
ARCDIQMTQSPSSLSASVGDRVTITCWASQGISNNLNWYQQKPGKTPKLLIYAASSLQSG
IPSRFSDSGSGTDYTLTISSLQPEDFATYYCQQSDSTS
>V209RF-AACZ03179013.1-igkv |(41180, 41480)|3.0|(1.000,1.000,1.000)|-1
ARCDIQMTQSPSSLSASVGDRVTITCRASQGISNNLNWYQQKPGKTPKLLIYAASSLQSG
IPSRFSDSGSGTDYTLTISSLQPEDFATYYCQQSDSTP
>V210RF-AACZ03179105.1-trdv |(5604, 5904)|2.62341399606|(0.970,0.807,0.949)|-1
SSVAQKVTQAQSSVSMPVRKAVTLNCLYEASWWSYYIFWYKQLPSKEMIFLIRQGSDEQN
AKSGRYSVNFKKAAKSVALTISALQLEDSAKYFCALWE
>V211RF-AACZ03179105.1-trav |(14455, 14745)|2.09714786147|(0.948,0.623,0.886)|-1
VSSILNVEQSPQSLHVQEGDSTSFTCSFPSSNFYALHWYRWETAKSPEALFVMTLNGDEK
KKGRISATLNTKKGYSYLYIKGSQPEDSATYLCAF
>V212RF-AACZ03179105.1-trav |(21888, 22187)|2.09118857441|(0.939,0.884,0.618)|-1
VNGRQVMQIPQYQHVQEGEVFTTYCNSSTTLSNIQWYKQRPGGHPVFLIQLVKSGEVKKQ
KRLTFQFGEAKKNSSLHITATQTTDVGTYFCAGHSAPQ
>V213RF-AACZ03179105.1-trav |(33413, 33703)|2.30624542563|(0.896,0.660,0.974)|-1
TIIDAKTTQSTSMDCAEGRAANLPCNHSTISGNEYIHWYRQIHSQGPQYIIHGLKNNETN
EMASLIITEDRKSSTLILPHATLRDTAVYYCIVRV
>V214RF-AACZ03179806.1-igkv |(3188, 3488)|2.99798400013|(1.000,0.998,1.000)|-1
ARCDIQMTQSPSSLSASVGDRVTITCRASQGIINNLNWYQQKPGKTPKLLIYAASSLQSG
IPSRFSDSGSGTDYTLTISSLQPEDFATYYCQQSDSTP
>V215RF-AACZ03183442.1-igkv |(591, 891)|2.98694800078|(0.994,0.996,0.997)|-1
ARCDIQMTQSPSSMSASVGDRVTITCRASQGINNNLNWYQQKPGKTPKLLIYAASSLQSG
IPSRFCDSGSGTDYTLTISSLQPEDFATYYCQQSDGTP
>V216RF-AACZ03191230.1-iglv |(228, 538)|2.95417917488|(0.991,1.000,0.966)|-1
SWAQSALTQPPSVSGSPGQSVTISCTGTSSDVGGYNYVSWYQQHPGTAPKLMIYDVSKRP
SGVPDRFSGSKSGNTASLTISGLQAEDEADYYCCSYAGSYS
>V0RF-CABD02043817.1-igkv |(3028, 3328)|2.99293200206|(0.996,0.997,1.000)|1
ARCDIQMTQSPSSLSASVGDRVTITCQASQGISNNLNWYQQKPEKTPKLLIYAASSLQSG
IPSRFSDSGSGTDYTLTISSLQPEDFATYYCQQSDSTP
>V1RF-CABD02105556.1-trav |(1379, 1688)|2.20098810495|(0.878,0.921,0.629)|1
TIMYLVIGTAGQSLEQPSEVTAVEGATVQINCTYQTSGFYGLSWYQQHDGGAPTFLSYNA
LDGLEETGHFSSFLSRSDSYGYLLLQELQMRDSASYFCAVR
>V2RF-CABD02105568.1-trav |(17617, 17906)|2.50322435022|(0.976,0.746,0.972)|1
QSVAQPEDQVTVAEGNPLTVKCTYSVSGNPYLFWYVQYPNKGLKFLLKYITGDNLVKGSY
GFEAEFNKSQTSFHLKKPSALVSDSALYFCAVRD
>V3RF-CABD02105570.1-trav |(17984, 18274)|2.93192000218|(0.978,0.980,0.974)|1
MSRGEDVEQSLFLSVQEGDSSIIKCTYTDSSSTYLYWYKQEPGAGLQLLMYIFSNMDMKQ
DQRLTVLLNKKDKHLSLRIADTQTGDSAIYFCAES
>V4RF-CABD02105575.1-trav |(937, 1225)|2.35575209054|(0.767,0.783,0.996)|1
VKSQKIEQNSEALNIQEGKTATLTCNYTNYSPAYLQWCRQDPGRGPVFLLLIRENEKEKR
KERLKVTFDTTLKQSLFHITASQPADSATYLCAL
>V5RF-CABD02105579.1-trav |(4709, 5003)|2.99385601037|(1.000,1.000,0.994)|1
GINGDSVVQTEGQVLLSEGDSLIVNCSYETTQYPSLFWYVQYPGEGPQLLLKAMKANDKG
RNKGFEATYHKETTSFHLEKDSVQESDSAVYFCALS
>V6RF-CABD02105581.1-trav |(5845, 6138)|2.83117465195|(0.989,0.885,1.000)|1
GSGKNQVEQSPQSLIILEGKNCTLRCNYTVSPFNNLRWYKQDTGRGPVSLTIMTFSENTK
SNGRYTATLDADTKQSSLHITASQLSDSASYICVVS
>V7RF-CABD02105584.1-trav |(2822, 3110)|2.99593600205|(1.000,0.996,1.000)|1
VWSQRKEVEQDPGPFNVPEGATVAFNCTYSNSASQSFFWYRQDCRKEPKLLMSVYSSGNE
DGRFTAQLNRASQYISLLIRDSQLSDSATYLCAV
>V8RF-CABD02105586.1-trav |(1660, 1957)|2.92100187489|(0.983,0.961,0.979)|1
GTRAQSVTQLDSHVSVSEGTPVLLRCNYSSSYSPSLFWYVQHPNKGLQLLLKYTSRATLV
KGINGFEAEFKKSETSFHLTKPSAHMSDAAEYFCAVS
>V9RF-CABD02105588.1-trav |(5783, 6073)|2.10521983614|(0.996,0.994,0.593)|1
VNGENVEQHPSTLSVQEGDSAVIKCTYSDSASNYFPWYKQELGKGPQLLIDIRSNVGEKK
DQGITVTLNKTAKHFSLHITETQPEDSAVYFCAAS
>V10RF-CABD02105588.1-trav |(25116, 25407)|2.98430822856|(1.000,0.998,0.987)|1
VWSQQKEVEQNSGPLSVPEGAIASLNCTYSDRRSQSFFWYRQYSGKSPELIMSIYSNGDK
EDGRFTAQLNKASQYVSLLIRDSQPSDSATYLCAV
>V11RF-CABD02105589.1-trav |(20536, 20829)|2.90991833509|(0.988,0.936,0.997)|1
VSRGESEGLHLPTLSVQEGDNSIINCAYSNSASDYFIWYKQESGKGPQFIIDIRSNMDKR
QGQRVTVLLNKTVKHLSLQIAATQPGDSAVYFCAEN
>V12RF-CABD02105589.1-trav |(26461, 26764)|2.91549151212|(0.981,0.942,1.000)|1
PGIAQKITQTQPGMFMQEKEAVTLDCTYDTSDQSYGLFWYKQPSSGEMIFLIYQGSYDQQ
NATEGRYSLNFQKARKSANLVISASQLGDSATYFCAMRE
>V13RF-CABD02105590.1-trav |(3574, 3868)|2.99899200002|(0.999,1.000,1.000)|1
RTRGDSVTQMEGPVTLSEEAFLTINCTYTATGYPSLFWYVQYPGEGLQLLLKATKADDKG
SNKGFEATYHKETTSFHLEKDSVQASDSAVYFCALS
>V14RF-CABD02105592.1-trav |(17384, 17677)|2.98442416586|(0.999,0.999,0.987)|1
VWSQQKEVEQDPGPLSVPEGAIASLNCTYSNSAFQYFMWYRQYSRKGPELLMYTYSSGNK
EDGRFTVQVDKSSKYISLFIRDSQPSDSATYLCAMS
>V15RF-CABD02105596.1-trav |(11716, 12003)|2.99899600001|(1.000,0.999,1.000)|1
VNSQQGEEDPQALSIQEGENATMNCSYKTSINNLQWYRQNSGRGLVHLILIRSNEREKHS
GRLRVTLDTSKKSSSLLITASRAADTASYFCATD
>V16RF-CABD02105598.1-trdv |(2122, 2425)|2.95966002957|(0.991,0.985,0.984)|1
SSMAQKVTQTQNEISVVEKEDVTLDCVYETRDTTYYLFWYKQPPSGELVFLVRQNSFDEQ
NEISGRYSWNFQKSTSSFNFTITASQVVDSAVYFCALSE
>V17RF-CABD02105602.1-trav |(5884, 6171)|2.98696000066|(0.997,0.996,0.994)|1
LSGEDQVTQSPEALRLQEGESSSLNCSYTVSGLRGLFWYRQDPGKGPEFLFTLYSAGEEK
EKERLKATLTKKESFLHITAPKPEDSATYLCAVQ
>V18RF-CABD02105602.1-trav |(17805, 18104)|2.80806255635|(0.969,0.887,0.979)|1
VSSKQEVTQIPAALSVPEGENLVLNCSFTDSAIYSLQWFRQDPGKGLTSLLLIQSSQREQ
TSGRLNASLDKSSGHSTLYIAASQPGDSATYLCAVRHS
>V19RF-CABD02105605.1-trav |(10343, 10640)|2.146439671|(0.823,0.701,0.721)|1
VRGIQVEQSPPDLILQEGANSTLRCNFSDSVNNLQWFHQNPWGQLINLFYIPSGTKQNGR
LSATTVATERYSLLYISSSQTTDSGVYFCAVEPQCSP
>V20RF-CABD02105611.1-trdv |(4032, 4332)|2.90577071228|(0.983,0.965,0.961)|1
SSVAQKVTQAQSSVSTSVRKAVTLNCLYETSQWSYYIFWYKQLPSKEMIFLIRQGSAEQN
AKSGRYSVNFKKAAKSVALTISALQLEDSAKYFCALWE
>V21RF-CABD02105612.1-trav |(1576, 1866)|2.37929614657|(0.961,0.698,0.962)|1
VNSILNVEQSPQSLHVQEGDSTNFTCSFPSSNFYALHWYRWETAKSPEALFVMTLNGDEK
KKGRISATLNTKEGYSYLYIKGSQPEDSATYLCAF
>V22RF-CABD02105614.1-trav |(2102, 2401)|2.17631563326|(0.957,0.951,0.625)|1
VNGQQVMQIPQYQHVQEGEDFTTYCNSSTTLSNIQWYKQRPGGHPVFLIQLVKNGEVKKQ
KRLTFQFGEAKKNSSLHITATQTTDVGTYFCAGHSAPQ
>V23RF-CABD02105615.1-trav |(7807, 8097)|2.91889600501|(0.975,0.970,0.974)|1
TIIDAKTTQPTSMDCAEGRAANLPCNHSTISGNEYVYWYRQIHSQGPQYIIHGLKNNETN
EMASLIITEDRKSSTLILPHATLRDTAVYYCIVRV
>V24RF-CABD02105616.1-trav |(38647, 38934)|2.3245502612|(0.882,0.682,0.912)|1
VRSQQPVQTPQAMILREGEDAVINCSSSKALYSVHWYRQKHGEAPVFLMILLKGGEQKGH
DKISASFNEKKQQSSLYLMASQLSYSGTYFCGAE
>V25RF-CABD02105619.1-trav |(6063, 6349)|1.8510847205|(0.713,0.515,0.904)|1
IMGDAKTTQPNSMESYEEEPVHLPCNHSTISGTDYIHWYRQLPSQGPEYVIHGLTSNVNR
MASLTIAEDRKSSTLILHRATLRDAAVYYCILR
>V26RF-CABD02105623.1-trav |(10762, 11052)|1.91651075237|(0.626,0.752,0.960)|1
VSSEDKVVQSPLSLVVHEGDTVTLNCSYEVTNFRSLLWNKQEKKAPTFLFMLTSSGIEKK
SGRLSSILDKKELFSILNITATQTRDSAIYLCAVE
>V27RF-CABD02105626.1-trdv |(13262, 13563)|2.88060549808|(0.989,0.983,0.925)|1
SGTAQTVTQSQPEMSVQEAETVTLSCTYDTSESNYYLFWYKQPPSRQMILVIRQEAYKQQ
NATENRFSVNFQKAAKSFSLKISDSQLGDTAMYFCAFM
>V28RF-CABD02105626.1-trav |(22480, 22780)|2.99496000066|(0.999,1.000,0.996)|1
FSMAQTVTQSQPEMSVQEAETVTLSCTYDTSESDYYLFWYKQPPSRQMILVIRQEAYKQQ
NATENRFSVNFQKAAKSFSLKISDSQLGDAAMYFCAYR
>V29RF-CABD02105628.1-trav |(15554, 15842)|2.98093200206|(0.992,0.993,0.996)|1
LSGELKVGQNPLFLSTQEGKNYTIYCNYSTTSDRLYWYKQDPGKSLESLFVLLSNGAVKQ
EGRLMASLDTKARLSSLHITAAVHDLSATYFCAV
>V30RF-CABD02105628.1-trav |(26467, 26757)|1.87634350868|(0.601,0.618,0.689)|1
GTSSNSVKQMGQITVSEGASVTMNGTYTSTGYPTLFWYVQYPSKPLQLLQRETMENSKNF
GGGNIKDKNSPIVKYSVQVSDSAMYYCLLGDTVLK
>V31RF-CABD02105628.1-trav |(32227, 32513)|2.0259000027|(0.675,0.679,0.672)|1
VSAAKNEVEQSPQDLTAQEGEFITINCSYSVGISVLHWLQQYPGGGIVSLFMLSSGKKKH
GRLIATINIQEKHSSLHITASHPRDSAIYICAV
>V32RF-CABD02136297.1-ighv |(2232, 2554)|2.56020596229|(0.898,0.777,0.955)|1
VLSQVTLKESGPVLVKPTEILTLTCTLSGFSLSTSGMGMSWIRQPPGKALEWLAHIFSND
KKSYSTSLKNRLIISKGTSKSQVVLTMTNMDPVDTATYYCAWRAQ
>V33RF-CABD02136313.1-ighv |(4960, 5275)|2.15712779203|(0.697,0.989,0.854)|1
VQCEVQLVESGGGLVQPGGSLRLSCAASGFTFSNIWMSWVRQALGKGLEWVGCIKSKANG
GTTDYTAPVKGRFTISRDDSKNTLYLQMNSLKTEDTAVYHCTT
>V34RF-CABD02136332.1-ighv |(9347, 9656)|2.99899200002|(0.999,1.000,1.000)|1
AHSQVQLVQSGAEVKKPGASVKVSCKASGYTFTSYYMHWVRQAPGQGLEWMGIINPSGGS
TSYAQKFQGRVTMTRDTSTSTVYMELSSLRSEDTAVYYCAR
>V35RF-CABD02136430.1-ighv |(38815, 39121)|2.81988260182|(0.929,0.912,1.000)|1
VQCEVHLVQSGGGLVQPGGSLRLSCAGSGFTFSSHAMHWVRQAPGKGLEWVSAIGTGGGT
YYADSVKGRFTISRDNAKNSLYLQMNSLRAEDMAVYYCAR
>V36RF-CABD02196505.1-igkv |(9143, 9461)|2.43848373701|(0.984,0.715,0.991)|1
AYGDIVMTQSPESLAVSLGERVTINCKSSQSVLYSSNNKNYLAWYQQKPGQAPKLLIYWA
STRQSGVPDRFSGSGSGTDFTLTISSLQAEDVAVYYCQQYYSTP
>V37RF-CABD02196508.1-igkv |(2277, 2565)|2.40201012694|(0.832,0.736,0.879)|1
TTLTQSPAFVSATPGDKVTISCKASQDIDDDMNWYQQKPGEAAIFIIQEATTLVSGIPPR
FSGSGYGTDFTLTINNIESEDAAYYFCLQDDNFP
>V38RF-CABD02196554.1-igkv |(8457, 8757)|2.99699200002|(0.999,0.998,1.000)|1
ARCDIQLTQSPTSLSASVGDRVTITCQASQGISNNLAWYQQKPGKVPKLLIYSASSLQSG
VPSRFSGSGSGTDFTRTISSLQPEDVATYYCQRTYNAP
>V39RF-CABD02196563.1-igkv |(2290, 2590)|3.0|(1.000,1.000,1.000)|1
ARCDIQMTQSPSSLSASVGDRVTITCRASQGISSWLAWYQQKPGKAPKLLIYAASSLESG
VPSRFSGSGSGTDFTLTISSLQPEDFATYYCQQANSFP
>V40RF-CABD02196568.1-igkv |(5046, 5361)|2.55832344908|(0.985,0.855,0.852)|1
SSADIVMTQTPLSLPVTPGQPASISCKSSQSLLHSDGKTYLYWYLQKPGQSPQLLIYEVS
NRASGVPDRFSGSGSGTDFTLKISRVEAEDVRVYYCMQGIQLP
>V41RF-CABD02196577.1-igkv |(8821, 9136)|2.41435322142|(0.960,0.715,0.953)|1
SSGDIVMTQTPLSLPVNPGQLASISCRSSQSLLHSNGYTYLHWYLQKPGKSPQLLIYRVS
SHFSGVPDRFSGSGSGSDFTLKISWVEAEDVGVYYCMQATQFP
>V42RF-CABD02196578.1-igkv |(13447, 13733)|2.66166539908|(0.942,0.860,0.895)|1
FLSVTPGEKVTITCQASEGIGNYLYWYQQKPDQAPKLLIKYASQSISGVPSRFSGSGSGT
DSGSGSGTDFTFAISSLEAEDAATYYCQQGNKH
>V43RF-CABD02196586.1-igkv |(1073, 1373)|2.99798400013|(1.000,0.998,1.000)|1
ARCDIQMTQSPSSVSASVGDRVTITCRASQGISNSLNWYQQKPGKAPRLLIYDASSLESG
VPSRFSGSGSGTDFTLTISSLQPEDFATYYCQQFNSYP
>V44RF-CABD02196587.1-igkv |(1282, 1582)|2.99899200002|(0.999,1.000,1.000)|1
ARCAIQMTQSPSSLSASVGDRVTITCRASQGISSYLAWYQQKPGKAPKLLIYYASSLQSG
VPSRFSGSGSGTDYTLTISSLQPEDFATYYCQQHSSTP
>V45RF-CABD02196588.1-igkv |(1835, 2135)|2.98445211916|(1.000,0.989,0.996)|1
TTGEIVMTQSPATLSVSPGERATLSCRASQSVSSYLAWYQQKPGQAPRLLIYGASNRATG
IPARFSGSGSGTDFTLTISSLEPEDFAVYYCQQYNNWS
>V46RF-CABD02196592.1-igkv |(6343, 6643)|1.69478858328|(0.833,0.668,0.558)|1
VRFDIQMTQSPSFLSASVGDRVSITCRASEGISSDLAWYLQKPGKSPKLFLYDAKDLRPG
VSSRFSGRGSGTDFTLTIISLKPEDFATYYCKQDFSYP
>V47RF-CABD02196595.1-igkv |(5365, 5665)|2.97795641525|(1.000,0.994,0.985)|1
ARCAIRMTQSPSSLSASTGDRVTITCRASQGISSYLAWYQQKPGKAPKLLIYAASTLQSG
VPSRFSGSGSGTEFTLTISCLQSEDFATYYCQQYYSYP
>V48RF-CABD02199693.1-igkv |(2056, 2356)|2.9969280013|(0.997,1.000,1.000)|1
ARCDIQVTQSPSSLSASVGDRVTITCRASQGISNELSWYQQKPGQAPTLLIYAASSLQSG
VPSRFSGSGSGTDFTLTISSLQPEDIATYYCLQDYTTP
>V49RF-CABD02231299.1-iglv |(4157, 4463)|2.95160484445|(0.992,0.987,0.974)|1
DSQTVVTQEPSFSVSPGGTVTLTCGLSSGSVSTSYYPSWYQQTPGQAPRMLIYSTNTRSS
GVPDRFFGSIIGNKAALTITGAQADDESDYYCVLYMGSGI
>V50RF-CABD02231318.1-iglv |(3555, 3862)|2.9859000027|(0.993,0.997,0.996)|1
SWANFMLTQPHSVSESPGQTVTISCTRSSGSIASNYVQWYQQRPGSAPTTVIYEDNQRPS
GVPDRFSGSIDSSSNSASLTISGLKTEDEADYYCQSYDSS
>V51RF-CABD02231359.1-iglv |(5556, 5865)|2.99392000218|(1.000,0.998,0.996)|1
SWAQSVLTQPPSVSAAPGQKVTISCSGSSSNIGNNYVSWYQQLPGTAPKILIYDNNKRPS
GISDRFSGSKSGTSATLGITGLQTGDEADYYCGTWDSSLSA
>V52RF-CABD02231360.1-igkv |(15331, 15617)|1.58513871845|(0.501,0.568,0.540)|1
SLSQPVLTQPPSASASLGASVTLTCPLSSGYSNYKVDWYQQRPGKGPRFVMRVGTSGIVG
SKGDGIPDRFSVLGSGLNRYLTIKNIQEEDESD
>V53RF-CABD02231360.1-iglv |(25045, 25355)|2.51750400002|(0.980,0.744,0.994)|1
SLSQPVLTQPTSLSASPGASARLTCTLRSGINLGTYRIYWYQQKPGSPPRYLLNYYSDSD
KHQGSGVPSRFSGSKDASTNAGILVISGLQSEDEADYYCMI
>V54RF-CABD02231362.1-iglv |(1583, 1892)|2.99188400513|(0.995,1.000,0.997)|1
SWAQSVLTQPPSASGTPGQRVTISCSGSSSNIGSNTVNWYQQLPGTAPKLLIYDNNKRPS
GVPDRFSGSKSGTSASLAISGLRSEDEADYYCAAWDDSLNG
>V55RF-CABD02231364.1-iglv |(18770, 19079)|2.98676801985|(0.997,0.990,1.000)|1
SWAQSVLTQPPSASGTPGQRITISCSGSSSNIGSNTVNWYQQLPGTAPKLLIYDNNKRPS
GVPDRFSGSKSGTSASLAISGLQSEDEADYYCAAWDDSLNG
>V56RF-CABD02231410.1-iglv |(1308, 1605)|2.99593600205|(1.000,0.996,1.000)|1
SVASYELTQPSSVSVSPGQTARITCSGDVLAKNYAGWYQQKPGQAPVLVIYKDSERPSGI
PERFSGSSSGTTVTLTISGAQVEDEADYYCYSAADNN
>V57RF-CABD02231415.1-iglv |(2745, 3048)|2.88980958526|(0.993,0.920,0.998)|1
SEASYELTQPPSVSVSLGQTARITCSGEELPKKYAYWYQQKPGQSPVLVIYKDSERPSGI
PERFSGSSSGTTVTLTISGVQAEDEADYYCLSADSSDTY
>V58RF-CABD02231416.1-iglv |(14948, 15251)|2.11488459846|(0.912,0.954,0.592)|1
SVTSYELTQPPSVSVAPGQAARITCGGNNIGSKSVHWYQQKPGQAPVLVIYYDSDWPSGI
PERFSGSNSGNTATLTISRVEAGDEADCYCQVWDSSSKH
>V59RF-CABD02231416.1-iglv |(22863, 23166)|2.64356011281|(0.994,0.798,0.994)|1
SVVSSELTQDPAVSVALGQTVRITCQGDSLRSYYASWYQQKPGQVPVLIIYGKNNRPSGI
PDRFSGSSSGNTASLTITGAQEEDEADYYCNSWDSSGNH
>V60RF-CABD02231419.1-iglv |(2003, 2306)|2.95834247428|(0.996,1.000,0.966)|1
SWAQSALTQPPSVSGSPGQSVTISCTGTSSDIGGYNRASWYQQHPGKAPKLMIYEVSKRP
SGVSNRFSGSKSGNTASLTISGLQAEDEADYYCSSYTSS
>V61RF-CABD02231421.1-iglv |(1448, 1751)|2.95709938076|(0.996,1.000,0.965)|1
SWAQSALTQPASVSGSPGQSITISCTGTSSDVGGYNYVSWYQQHPGKAPKLMIYYVSNRP
SGVSNRFSGSKSGNTASLTISGLQAEDEADYYCSSYTSS
>V62RF-CABD02231422.1-iglv |(7425, 7728)|2.92296891064|(0.997,0.942,0.996)|1
SATSYELTQPHSVSVATAQTARITCGGNNIGSKAVHWYQQKPGQDPVLVIYSDSNRPSGI
PERFSGSNSGNTATLTISRIEAGDEADYYCQVWDSSSDH
>V63RF-CABD02231427.1-iglv |(14063, 14366)|2.98767605248|(0.999,0.990,0.999)|1
SEASYELTQSPSVSVSPGQTARITCSGDALPKKYAYWYQQKPGQAPVLVIYEDSKQPSGI
PERFSGSSSGTMATLTISGAQVEDEADYYCYSTDSSGNH
>V64RF-CABD02231427.1-iglv |(25067, 25377)|2.85573926526|(0.964,0.996,0.911)|1
SWAQSALIQPPSASGSPGQSVTISCTGTSSDIGGYNYVSWYQRHPGKAPKLMIYEVSNRP
SGVPNRFSGSKSGNTASLTISGLQAEDEADYYCCSYAGSNN
>V65RF-CABD02231431.1-iglv |(3583, 3879)|2.99199200002|(0.998,0.997,0.997)|1
SVASYELTQPPSVSVSPGQTASITCSGDKLGDEYAYWYQQKPGQSPVLVIYQDSKRPSGI
PERFSGSNSGNTATLTISGTQAMDEADYYCQAWDSST
>V66RF-CABD02352478.1-trbv |(1118, 1418)|2.13868952991|(0.979,0.992,0.602)|1
LTEPEVTQTPSHQVTQMGQEVILRCVPISNHLYFYWYRQILGQKVEFLVSFYNNKISEKA
EIFDDQFSVERPDGSNFTLKIRSTKLEDSAMYFCASSE
>V67RF-CABD02352480.1-trbv |(136, 449)|2.90828299872|(0.981,0.989,0.944)|1
PIDTEVTQTPKHLVMGMTNKKSLKCEQHMGHRAMYWYKQKAKKPPELMFVYSYEKLSVNE
SVPSRFSPECPNNSLLNLHLHALQPEDSALYLCASSQDTALQ
>V68RF-CABD02352480.1-trbv |(7988, 8284)|2.36573966894|(0.971,0.845,0.766)|1
PVEAGVTQTPRYLIKTRGQQVTLSCSPISGHRSVSWYQQTLGQGLQFLFEYFGETQRNKG
NFPGRFSGRQFSNSRSEMNVSTLELGDSALYLCASSL
>V69RF-CABD02352482.1-trbv |(248, 545)|2.96780277491|(0.974,1.000,0.999)|1
PVNAGVAQTPKFQVLKTGQSMTLQCAQDMNHNSMYWYRQDPGMGLRLIYYSAAEGTTAKG
EVPDGYNVSRLNKREFSLRLESAAPSQTSVYFCASSE
>V70RF-CABD02352488.1-trbv |(3197, 3494)|2.96758870068|(0.998,0.981,0.990)|1
PVNAGVTQTPKFHVLKTGQSMTLLCAQDMNHEYMYWYRQDPGMGLRLIHYSVGEGTTAKG
EVPDGYNVSRLKKQNFLLGLESAAPSQTSVYFCASSY
>V71RF-CABD02352491.1-trbv |(2383, 2680)|2.99193200206|(0.999,0.998,0.995)|1
PLDTAVSQTPKYLVTQMGKKESLKCEQNLGHNAMYWYKQDSKKFLKTMFIYSNKEPILNE
TVPNRFSPDSPDKAHLNLHINSLELGDSAVYFCASSQ
>V72RF-CABD02352492.1-trbv |(775, 1088)|2.90417800597|(0.994,0.998,0.929)|1
PMEMGVTQTPRHLVMGMTNKKSLKCEQHLGHNAMYWYKQSAKKPLELMFVYSLEERVENN
SVPSRFSPECPNSSHLFLHLHALQPEDSALYLCASSQDTALQ
>V73RF-CABD02352493.1-trbv |(4882, 5179)|2.92495665333|(0.983,1.000,0.948)|1
PVDAGVTQTPKFQVLKTGQSMTLQCAQDMNHNYMYWYRQDPGKGLRLIHYSAGEGTTAKG
EVPDGYNVSRLNTQNFLLRLELAARSQTSVYFCATSE
>V74RF-CABD02352494.1-trbv |(447, 747)|2.8626958002|(0.986,0.958,0.933)|1
HTRAGVSQSPSNKVTEKGKDVVFRCDPISGHSVLYWYQQSLGQGLEFLIYFQGNSAPDKS
GLPSDRFSAERTGGSVSTLTIQRTQQEDSAMYLCASSL
>V75RF-CABD02352498.1-trbv |(5308, 5605)|2.41573137572|(0.973,0.864,0.773)|1
PMIAGITQAPTSQILAAGRSMTLRCTQDMRHNAMYWYRQDLGLGLRLIHYSNTAGTTGKG
EVPDGYSVSRANTDDFPLMLASAVPSQTSVYFCASSD
>V76RF-CABD02352499.1-trbv |(1151, 1451)|2.95282941374|(0.998,0.998,0.962)|1
HTGAGVSQTPSNKVTEKGKDVELRCDPISGHTALYWYRQSLGQGPEFLIYFQGTGATDDS
GLPNDRFFAVRPEGSVSTLKIQRTEQGDSAVYLCASSL
>V77RF-CABD02352499.1-trbv |(5984, 6280)|2.12689065619|(0.787,0.649,0.766)|1
PVEAGATQSPTHLLKTRGQQVTLRCSPISGHSSVSWYQKAPGQGPQFIFEYANELRRLEG
NFPNRFSGRQFHDYRSEMNVSALELGDSALYLCARSL
>V78RF-CABD02352499.1-trbv |(8716, 9012)|2.9684040992|(0.984,0.994,0.991)|1
PVDSGVTQTPKHLITATGQRVTLRCSPRSGDLSVYWYQQSLDQGLQFLIQYYNGEERAKG
NILERFSAQQFPDSHSELNLSSLELGDSALYLCASSV
>V79RF-CABD02352499.1-trbv |(16726, 17023)|1.90169285907|(0.801,0.517,0.981)|1
HRDAEITQSPRHKITETGRQVTLACYQTWNHNNMFWYRQDLGHGLRLSHYSYGVQDTNKG
EVSDGCSVSRSNTEDFPLTLESAASSQTSVYFCASSE
>V80RF-CABD02352501.1-trbv |(6663, 6963)|2.00850936551|(0.735,0.580,0.804)|1
CTDPGIIQSPKHEVTEMGQTVTLRCEPIFGHNLLFWYRETFVQGLELLSYFRSRSIIDNA
GMPTDRFSAERPDGSFSTLKIQPAEQGDSAVYVCASRL
>V81RF-CABD02352501.1-trbv |(16783, 17080)|2.92274160714|(1.000,1.000,0.938)|1
PVNAGVTQTPKFQVLKTGQSMTLQCAQDMNHDYMYWYRQDPGMGLRLIHYSVGAGITDKG
EVPNGYNVSRSNTEDFPLRLQSAAPSQTSVYFCASSY
>V82RF-CABD02352502.1-trbv |(788, 1088)|2.9898400105|(0.998,1.000,0.992)|1
HTGAGVSQSPRYKVAKRGRDVALRCDSISGHVTLYWYRQTLGQGSEVLTYFRSDAQRDKS
GRPSGRFSAERPERSVSTLKIQRTEQGDSAVYLCASSL
>V83RF-CABD02352503.1-trbv |(2597, 2893)|2.9338984707|(0.994,0.955,0.991)|1
SVETGVTQSPTHLIKTRGQQVTLRCSPQSGHNTVSWYQQALGQGPQLIFQYYREEENGRG
NFSPRFSGRQFPNYSSELNVNALELDDSALYLCASSL
>V84RF-CABD02352508.1-trbv |(1078, 1374)|2.98171202074|(0.994,0.988,1.000)|1
PVDAGVTQSPTHLIKTRGQQVTLRCSPQSGHNTVSWYQQALGQGPQFIFEYYEKEERGRG
NFPDRFSARQFPNYSSELNVNALLLGDSALYLCASSL
>V85RF-CABD02352508.1-trbv |(6352, 6643)|1.93871824476|(0.697,0.671,0.606)|1
NAGVTQTPKFHVVKTGQSMTLLCAQDMNHEYMYRYRQDPGKGLRLIYYSVAAALTDKGEV
PNGYNVSRSNTEDFPLKLESAAPSQTSVYFCGSSY
>V86RF-CABD02352509.1-trbv |(2773, 3083)|2.10789612722|(0.862,0.961,0.586)|1
HTGAGVSQAPRFKVTKRGQDVALRCDPISGHVALYWYRQALGQGPEFLTYFNDEAQPDKS
GMPNDRFSAERPEGSISTLTIQRTEQRDSAMYLCASSLARA
>V87RF-CABD02352509.1-trbv |(10643, 10939)|2.95882119202|(0.998,0.981,0.982)|1
LVDAGVTQSPTHLIKTRGQQVTLRCSPKSGHDTVSWYQQALGQGPQFIFQYYEEEERQRG
NFPDRFSGHQFPNYSSELNVNALLLGDSALYLCASSL
>V88RF-CABD02352510.1-trbv |(11938, 12229)|2.890156596|(0.985,0.960,0.952)|1
NAGVTQTPKFHILKTGQSMTLQCAQDMNHGYMSWYRQDPGMGLRLIYYSAAAGTIDKGEV
PNGYNVSRLNTEDFLLRPVSAAPSQTSVYFCASSY
>V89RF-CABD02352511.1-trbv |(3159, 3459)|2.98894800078|(0.998,0.995,0.996)|1
HTGAGVSQSPRYKVTKRGQDVTLRCDPISSHATLYWYQQALGQGPEFLTYFNYEAQPDKS
GLPNDRFSAERPEGSNSTLTIQRTEQRDSAMYLCASSL
>V90RF-CABD02352511.1-trbv |(16331, 16627)|2.3036896335|(0.963,0.964,0.669)|1
PVDAGVTQSPTHLIKMRGQQVTLRCSPKSGHDTVSWYQQALGQGPQFIFEYYEKEERGRG
NFPDRFSARQFPNYSSELNVNPLLMGDSALYLCASSL
>V91RF-CABD02352511.1-trbv |(25598, 25898)|2.99696400065|(1.000,1.000,0.997)|1
HADTGVSQDPRHKITKRGQNVTFRCDPISEHNQLYWYRQTLGQGPEFLTYFQNEAQLEKS
RLLSDRFSAERPKGSFSTLEIQRTEQGDSAMYLCASSL
>V92RF-CABD02352512.1-trbv |(835, 1135)|2.99696400065|(1.000,1.000,0.997)|1
HADTGVSQDPRHKITKRGQNVTFRCDPISEHNQLYWYRQTLGQGPEFLTYFQNEAQLEKS
RLLSDRFSAERPKGSFSTLEIQRTEQGDSAMYLCASSL
>V93RF-CABD02352512.1-trbv |(7390, 7687)|2.90723335954|(0.996,0.933,0.994)|1
SVAAGVIQSPRHLIKEKRETATLKCYPIPRHDTVYWYQQGPGQDPQFLISFYEKMQSDKG
SIPDRFSAQQFSDYHSELNMSSLELGDSALYFCASSL
>V94RF-CABD02352513.1-trbv |(1353, 1650)|2.99093200206|(0.998,0.999,0.994)|1
HMDAGITQSPRHKVTEIGTPVTLRCHQTENHRYMYWYRQDPGHGLRLIHYSYGVKDTDKG
EVSDGYSVSRSKTEDFLLTLESATSSQTSVYFCAISE
>V95RF-CABD02352514.1-trbv |(8741, 9041)|2.92152044138|(0.991,0.951,0.986)|1
LIEAGVVQSPRYKIIEKKQPVAFWCNPISGHNTLYWYRQNLGQGPELLIRYENEEAVDDS
QLPKDRFSAERLKGVDSTLKIQPAELGDSAVYLCASSL
>V96RF-CABD02352514.1-trbv |(14343, 14643)|2.98679201242|(0.999,0.993,0.995)|1
HTDAGVIQSPRHEVTEMGQEVTLRCKPISGHNSLFWYRQTMMRGLELLIYFNNNVPIDDS
GMPKDRFSAKMPNASFSTLKIQPSEPRDSAVYFCASSL
>V97RF-CABD02352515.1-trbv |(2177, 2477)|2.93982541375|(0.994,0.993,0.958)|1
HTDAGVIQSPRHEVTEMGQEVTLRCKPISGHNSLFWYRQTMMRGLELLIYFNNNVPIDDS
AMPKDRFSAKMPNASFSTLKIQPSEPRDSAVYFCASSL
>V98RF-CABD02352520.1-trbv |(3657, 3957)|2.94948631982|(1.000,0.971,0.983)|1
HIEAGVTQFPSHSVIEKGQTVTLRCDPISGHDNLYWYRRVMGKEIKFLLHFVKESKQDES
GMPNNRFLAERTGGTYSTLKVQPAELEDSGVYFCASSQ
>V99RF-CABD02352520.1-trbv |(8783, 9080)|2.51894489301|(0.940,0.894,0.785)|1
HGDAMVIQNPRYQVTQFGKPVTLSCSQNLNHNIMYWYQQKSSQAPKLLFHYYDKDFNNEA
DTPDNFQSRRPNTSFCFLDISSPGLGDAAMYLCATSR
>V100RF-CABD02352525.1-trbv |(5450, 5746)|2.86555347861|(0.966,0.971,0.933)|1
LSNAGVMQNPRHLVRRRGQEARLRCSPMKGHSHVYWYRQLPEEGLKFMVYLQKENIIDES
GMPKERFSAEFPKEGPSILRIQQAVRGDSAAYFCASS
>V101RF-CABD02352526.1-trbv |(2325, 2622)|2.99699200002|(0.999,0.998,1.000)|1
TVDGGITQSPKYLFRKEGQNVTLNCEQNLNHDAMYWYRQDPGQGLRLIYYSQIVNDFQKG
DIAEGYSVSREKKESFPLTVTSAQKNPTAFYLCASSI
>V102RF-CABD02352526.1-trbv |(20182, 20482)|2.45425740407|(0.923,0.819,0.807)|1
STDTKVTQRPRLLVKASEQKAKMDCVPIKGHSYVYWYRKKLEEELKFLVYFQNEEIIQKA
EIINERFLAQCSKNSSCTLEIQSTESGDTALYFCASSK
>V103RF-CABD02352526.1-trbv |(29242, 29542)|2.93126990764|(0.995,0.993,0.951)|1
SFHAKVTQTPGHLVKGKGQKTKMDCTPEKGHTFVYWYQQNQNKEFMLLISFQNEQVLQET
EMHKKRFSSQCPSNTPCSLAILSSEPGDTALYLCASSQ
>V104RF-CABD02352529.1-trbv |(2516, 2814)|2.87744151315|(0.991,0.988,0.919)|1
SMDADVTQTPRNRITKTGKRIMLECSQTKGHDRMYWYRQDPGLGLRLIYYSFDVKDINKG
EISDGYSVSRQAQAKFSLSLESATPNQTALYFCATSD
>V105RF-CABD02352529.1-trbv |(16657, 16954)|2.30013560461|(0.949,0.998,0.655)|1
LMEADIYQTPRYLVIGTGKKITLECSQTMGHDKMYWYQQDPGMELHLIHYSYGVNSTEKG
GLSSESTVSRIRTEHFPLTLESARPSHTSQYLCASSE
>V106RF-CABD02352531.1-trbv |(24520, 24817)|2.95204798746|(0.996,1.000,0.961)|1
PLEAQVTQNPRYLITVTGKKLTVTCSQNMNHEYMSWYRQDPGLGLRQIYYSINVEAIDKG
DVPEGYNVSRKEKRNFPLILESPSPNQTSLYFCASSL
>V107RF-CABD02352532.1-trbv |(6479, 6776)|2.97289600501|(0.989,0.994,0.990)|1
LVDVKVTQSSRYLVKRMGEKVFLECVQDMDHENMFWYRQDPGLGLRLIYFSSDVKMKEKG
DIPEGYSVSREKKERFSLILESTSTNQTSMYLCASSL
>V108RF-CABD02377004.1-trbv |(3098, 3398)|2.83595312612|(0.950,0.917,0.976)|1
SMDTKVTQRPRLLVKANEQKAKMDCVPIKRHSYVYWYHKTLEEELKFLIYFQNEEIIQKA
EIINERFSAQCPQNSPCTLEIQSTESGDTARYFCANSK
>V109RF-CABD02377004.1-trbv |(12039, 12339)|2.21641890943|(0.789,0.699,0.763)|1
CFHAKVTQTPGYLVKGKGRKTKMYCTPENGHTFVCWYQQNQNKEFMFLISFQNEQVLQET
EMHKKRFSPQCPKNPPCSLAILSSEPGDTALYLCASSP
>V110RF-CABD02377005.1-trbv |(21584, 21875)|2.79589600501|(0.934,0.933,0.929)|1
LMEAEIYQTPRYHVIGTGKKITLECSQTMGHDKMYWSRSRNGITPHPPFLWVNSTEKGDL
SSESTVSRIRIEHFPLTLESASPSHTSQYLCASSE
>V111RF-CABD02377030.1-trbv |(2304, 2607)|2.83137968596|(0.951,0.965,0.920)|1
SVFSAVISQKPSRDICQRGTSMTIQCQVNSQVTMMFWYCQQPGQSVTLIATANQGSEATY
ESGFVIDKFPISCPNLTFSTLTVSNRSPEDSSIYLCSVE
>V112RF-CABD02105639.1-trdv |(1838, 2144)|2.89206272671|(0.980,0.971,0.946)|-1
RGMLCDKVTQSSPDQTVASGSEVVLLCTYDTVYSNPDLFWYRIRPDYSFQFVFYGDNSGS
QAADFTQGRFSVKHILTQKAFHLVISPVRTEDSATYYCAF
>V113RF-CABD02117385.1-ighv |(3331, 3640)|2.99798400013|(1.000,0.998,1.000)|-1
AHSQVQLVQSGAEVKKPGASVKVSCKASGYTFTGYAMHWVRQAPGQRLEWMGWINTGNGN
TKYSQKFQGRVTITRDTSASTAYMELSSLRSEDTAVYYCAR
>V114RF-CABD02117388.1-ighv |(2426, 2731)|1.58561749056|(0.759,0.528,0.594)|-1
VLSQITLKESGPTLVKPTQTLTLTCTFSGFSLSTSGTSVSWIRQPPGKALEWLAAIYSDD
DKRYSPSLKSRLTITKDTSKNQVVLTMTNMDPVDTATYYC
>V115RF-CABD02117395.1-ighv |(10192, 10503)|2.99596800026|(1.000,0.998,0.998)|-1
VQCEVQLVESGGGLVQPGRSLRLSCVASGFTFDDYAMHWVRQAPGKGLEWVSGISWNSGS
TGYADSVKGRFTISRDNAKNSLYLQMNSLRAEDTALYYCAKD
>V116RF-CABD02117395.1-ighv |(23380, 23689)|2.74720612632|(0.967,0.994,0.846)|-1
VHSQVQLVQSGAEVRKPGSSVKVSCKLSGGTFSSYAISWVRQAPGQGLEWMGGFIPILGT
ANYAQKFQGRVTITADESTSTAYMELSSLRSEDTAVYYCAR
>V117RF-CABD02117398.1-ighv |(503, 809)|2.98384833171|(0.987,0.999,0.999)|-1
VQCEVQLVESEGGLVQPGGSLRLSCAASGFTFSSYNMHWVRQAPGKGLEWVSAIGTGGDT
YYPGSVKGRFTISRENAKNSLYLQMNSLRAEDTAVYYCAR
>V118RF-CABD02117416.1-ighv |(7584, 7893)|2.98759608|(0.999,1.000,0.989)|-1
VQCEVQLVESGGGLVQPGGSLRLSCAASGFTFSDYYMSWVRQAPGKGLEWVSGINWNGGS
TGYADSVKGRFTISRNNAKNSLYLQMNSLRAEDTALYYCAR
>V119RF-CABD02117419.1-ighv |(907, 1216)|3.0|(1.000,1.000,1.000)|-1
VQCEVQLVESGGGLVKPGGSLRLSCAASGFTFSSYWMSWVRQAPGKGLEWVSVISSSGRT
TYYADSVKGRFTISRDNAKNSLYLQMNSLRAEDTAVYYCAR
>V120RF-CABD02117420.1-ighv |(2703, 3012)|2.994900005|(1.000,0.995,1.000)|-1
VQCDVQLVESGGGLVQPGGSLRLSCAASGFTFSSYGMSWVRQAPGKGLEWVSYISSSSSY
IYYADSVKGRFTISRDNAKNSLYLQMNSLRAEDTAVYYCAR
>V121RF-CABD02117421.1-ighv |(1503, 1818)|2.99899600001|(1.000,1.000,0.999)|-1
AQCEVQLVESGGGLVKPGGSLRLSCAASGFTFSNYYMEWVRQAPGKGLEWVGFIRTKAKG
GTTEYAASVKGRFTISRDDSKSIAYLQMNSLKTEDTAVYYCTR
>V122RF-CABD02117430.1-ighv |(2094, 2408)|2.52326206615|(0.950,0.785,0.901)|-1
VLSQVTLKESGPVLVKPTETLTLTCTVSGFSLSNARMGVSWIRQPPGKALEWLAHIFSND
EKSYSTSLKSRLTISKDTSKSQVVLTMTNMDPVDTATYYCAWI
>V123RF-CABD02117431.1-ighv |(1312, 1621)|2.93755643843|(0.996,0.992,0.956)|-1
AHSQVQLVQSGSEVKKPGASVKVSCKASGYTFTSYGMNWVRQAPGQGLEWMGWINTYTGN
PTYAQGFTGRFVFSMDTSVSTAYLQISSLKAEDTAMYYCAR
>V124RF-CABD02117438.1-ighv |(419, 731)|2.32417946043|(0.853,0.979,0.674)|-1
VLSQVQLQQWGPGLVKPSETLSLTCAVYGGSISSSDYYWSWIRQPPGKGLEWIGLINYVR
STNYNPSLKSRVTISVDTSKNQFSLKLSSVTAADTAVYYCAR
>V125RF-CABD02117439.1-ighv |(2063, 2375)|2.75866351218|(0.903,0.893,1.000)|-1
VLSQVQLQQWGTGLVKPSETLSLTCAVYGGSISSDGYYWSWIRQPPGKGLEWIGYIYYSG
STYYNPSLKSRVTISVDTSKNQFSLKLSSVTAADTAVYYCAR
>V126RF-CABD02117442.1-ighv |(1416, 1725)|2.96791252616|(0.983,0.987,0.999)|-1
VQCQVQLVESAGGVVQPGRSLTLSCTASGFTFSSYGMHWVRQAPGKGLEWVAVISYDASN
KYYAASVKGRFTISRDNSKNTLYLQMNSLRAEDTAVYYCAK
>V127RF-CABD02117444.1-ighv |(7682, 7991)|3.0|(1.000,1.000,1.000)|-1
VQCQVQLVESGGGVVQPGRSLRLSCTASGFTFSSYGMHWVRQAPGKGLEWVAVISYDASN
KYYADSVKGRFTISRDNSKNTLYLQMNSLRAEDTAVYYCAK
>V128RF-CABD02117445.1-ighv |(8585, 8891)|2.30904080662|(0.898,0.921,0.674)|-1
VLSQVQLQQWGAGVVKPSETLSLTCAVYGGSFSGYYWNWIRQPPGKGLEWIGRISYDGST
NYNPSLKSRVTISVDTSKNQFSLKLSSVTAADTAVYYCAR
>V129RF-CABD02117454.1-ighv |(1407, 1716)|2.59170734905|(0.991,0.965,0.789)|-1
VLSQVQLQESGPGLVKPSETLSLTCVVSGGSISSSNWWSWVRQPPGKGLEWIGEIYHSGS
PNYNPSLKSRVTISVDKSKNQFSLKLSSVTATDTAVYYCAR
>V130RF-CABD02117457.1-ighv |(5100, 5407)|2.96928365264|(1.000,0.998,0.974)|-1
VQCEVQLVESGGGLVQPEGSLKLSCAASGFTFSSYAMDWVRQAPGKGLEWVAHIWNDGSQ
KYYADSVKGRFTISRDNSKSMLYLQMDSLKAEDTAMYYCT
>V131RF-CABD02117463.1-ighv |(7715, 8026)|2.68145312779|(0.991,0.999,0.812)|-1
VQCEVQLVESGGGVVQPGRSLRLSCAASGFTFDDYAMHWVRQAPGKGLEWVSRISWGGGS
TYYADSVKGLFTISRDNSKISLYLQMNSLRAEDTALYYCAKD
>V132RF-CABD02117467.1-ighv |(8162, 8468)|2.65156184191|(0.983,0.799,0.997)|-1
AQCEVQLVESGGGLVQPGGSLRPSCAASGFAFSSYVLHWVRRAPGKGLEWVSAIGTGGDT
YYADSVMGRFTISRDNAKKSLYLQMNSLIAEDMAVYYCAR
>V133RF-CABD02117467.1-ighv |(15696, 16005)|2.99899200002|(0.999,1.000,1.000)|-1
AHSQVQLVQSGAEVKKPGASVKVSCKASGYTFTSYYMHWVRQAPGQGLEWMGIINPSGGS
TSYAQKFQGRVTMTRDTSTSTVYMELSSLRSEDTAVYYCAR
>V134RF-CABD02117467.1-ighv |(19808, 20117)|2.95686891211|(0.996,0.968,0.996)|-1
AYSQMQLVQSGAEVKKTGASVKVSCKASGYTFTYRSLHWVRQAPGQALEWMGWITPYNGN
TNYAQKFQDRVTITRDRSMSTAYMELSSLRSEDTAVYYCAR
>V135RF-CABD02117471.1-ighv |(687, 996)|2.9734040992|(0.997,0.987,0.990)|-1
VQCDVQLVQSGGGLVQPGGSLRLSCAASGFTFSSYWMHWVRQAPGKGLEWVANIKKDGSG
KYYVDSVKGRFTISRDNAKNSLYLQMNSLRAEDTAVYYCAR
>V136RF-CABD02117473.1-ighv |(12286, 12601)|2.99899600001|(1.000,0.999,1.000)|-1
VQCEVQLVESGGGLVKPGGSLRLSCTASGFTFGDYTMSWVRQAPGKGLEWVGFIRSKAYG
GTTEYAASVKGRFTISRDDSKSIAYLQMNSLKTEDTAVYYCTT
>V137RF-CABD02117475.1-ighv |(8201, 8508)|2.51788131838|(0.919,0.969,0.749)|-1
VCAEVQLVQSAAEVKRPGESLRISCKGSGYSFTSYWIGWVRQMPGKGLEWMGIIYPGDSD
TRYSPSFQGQVTISADSSISTAYLQWSSLKASDTAMYYCA
>V138RF-CABD02117477.1-ighv |(2704, 3013)|2.98632422844|(1.000,1.000,0.987)|-1
VQCEVQLVESGGGLVQPGGSLRLSCVASGFTFSSYAMSWVRQAPGKGLEWVSTISSTGGS
TWYPGSVKGRFTISRDNSKNTLYLQMNSLRAEDTAVYYCAK
>V139RF-CABD02117481.1-ighv |(9894, 10203)|1.71214945467|(0.984,0.506,0.871)|-1
ILSQVQLQESGPGLVKPSETLSLTCAVSGDSISSGNWWIWVRQPPGKGLEWIGEINHSGS
TYYNPSLKSRITMSVDTSKNQFSLKLSSVTAADTAVYYCAR
>V140RF-CABD02117482.1-ighv |(11133, 11445)|2.97840127932|(1.000,0.980,1.000)|-1
VLSQVQLQESGPGLVKPSQTLSLTCTVSGGSISSGSYYWSWIRQPPGKGLEWIGYIYYSG
STNYNPSLKSRVTISVDTSKNQFSLKLSSVTAADTAVYYCAR
>V141RF-CABD02117482.1-ighv |(15935, 16229)|2.97012824764|(0.997,0.984,0.990)|-1
QLVQSGPEVKKPGASVKVSCKASGYTFTSSAMQWVRQAPGQGLEWIGWIIVGSGNTNYAQ
KFQGRVTITRDTSTSTAYMELSSLRSEDMAVYYCAA
>V142RF-CABD02117487.1-ighv |(1480, 1789)|3.0|(1.000,1.000,1.000)|-1
VQCEVQLVESGGGLVQPGGSLRLSCAASGFTFSSYHMSWVRQAPGKGLEWVSVIYSDGSS
TYYAASVKGRFTISRDNSKNTLYLQMNSLRAEDTAVYYCAR
>V143RF-CABD02117492.1-ighv |(7493, 7808)|2.98385201038|(0.993,0.999,0.992)|-1
VQCEVQLVESGGGLVQPGGSLRLSCAASGFTFSNYYKSWVCQAPGKGLEWVRFIRNKANG
GTTEYTTSVKGRFTISRDDSKSITYLQMNSLKTEDTAVYYCSR
>V144RF-CABD02117494.1-ighv |(3416, 3731)|3.0|(1.000,1.000,1.000)|-1
VQCEVQLLESGGGLVQPGGSLRLSCAASGFTFSDHYMDWVRQAPGKGLEWVGRIRNKANS
YTTEYAASVKGRFTISRDDSKNSLYLQMNSLKTEDTAVYYCTT
>V145RF-CABD02117499.1-ighv |(3042, 3351)|3.0|(1.000,1.000,1.000)|-1
VQCEVQLLESGGGLVQPGGSLRLSCAASGFTFSSYWMHWVRQAPGKGLEWVSRINSDGSS
TSYADSVKGRFTISRDNAKNTLYLQMNSLRAEDTAVYYCAR
>V146RF-CABD02117506.1-ighv |(3288, 3597)|2.84787137132|(0.977,0.951,0.931)|-1
TYSQVQLVQSGHEVKQPGASVKVSCKASGYSFTSYGMNWVRQAPGQGLEWMGWFNTYTGN
PTYAQGFTGRFVFSMDTSVSTAYLQISSLKAEDTAMYYCAR
>V147RF-CABD02117545.1-ighv |(2488, 2803)|2.78298089753|(0.928,0.900,0.963)|-1
VQCEVQLVESGGGLVQPGGSLRLSCAASGFTFSDHYRSWVRQAQGKGLELVGLIRNKANS
YTTEYAASGKGRFTISRGDSKNTLYLQMSSLKTEDLAVYYCAR
>V148RF-CABD02117766.1-ighv |(420, 729)|2.97976801985|(0.990,0.997,0.993)|-1
AHSQVQLVQSGAEVKKPGASVKVSCKASGYTFTDYYMHWVRQAPGQGLEWMGRINPNSGG
TNYTQKFQGRVTMTRDTSISTAYMELSRLRSEDTATYYCAR
>V149RF-CABD02117767.1-ighv |(2221, 2530)|2.96737780343|(0.978,0.994,0.998)|-1
AHSQVQLVQSGAEVKKPGASVKVSCKASGYTFTGYYMHWVRQAPGQGLEWMGWINPNSGG
TNYAQKFQGRVTMTRDTSISTAYMELSRLRSEDTATYYCTR
>V150RF-CABD02136430.1-ighv |(23813, 24119)|2.81988260182|(0.929,0.912,1.000)|-1
VQCEVHLVQSGGGLVQPGGSLRLSCAGSGFTFSSHAMHWVRQAPGKGLEWVSAIGTGGGT
YYADSVKGRFTISRDNAKNSLYLQMNSLRAEDMAVYYCAR
>V151RF-CABD02136430.1-ighv |(37941, 38248)|2.99899600001|(1.000,1.000,0.999)|-1
AQCEVQLVESGGGLVQPGGSLRLSCAASGFTFSNHYTSWVLQAPGKGLEWVSYISGDSDY
TNYADSVKGRFTISRDNAKNSLYLRMNSLRAEDTAVYYCV
>V152RF-CABD02196508.1-igkv |(4447, 4759)|2.5900189121|(0.927,0.940,0.793)|-1
CNGDIVLTQSPASLAMSPGQRATITCRASECVSFLGINLIHWYQQKPGQPPKLLIYQASN
KDIGVPARFSGSGSGTDFTLTINPVEANNTAKYYCLQSKNFP
>V153RF-CABD02196513.1-igkv |(3814, 4114)|2.99296000066|(0.999,0.998,0.996)|-1
AKCDIQMTQSPSTLSASVGDRVTITCRASQGISKLLAWYQQKPGKAPKLLIYAASSLESG
VPSRFSGSGSGTEFTLTISSLQPDDFATYYCQQHSSTP
>V154RF-CABD02196515.1-igkv |(8253, 8553)|2.94762728311|(0.999,0.956,1.000)|-1
ARCDIRMTQSPSSLSASVGDRVTITCRASQGIRNDLGWYQQKPGKAPKILIYAASSLQSG
VPSRFSGSGSGTDFTLTISSLQPEDFATYYCLQDYNYP
>V155RF-CABD02196517.1-igkv |(696, 995)|2.73734912932|(0.995,0.982,0.846)|-1
IVMTQSPATLSLSPGERATLSCRASQSVSSYLTWYQQKPGQAPRLLIYGASTRATGIPAR
FSGSGSGTDFTLTISSLQPEDFAVYYCQQHSNWPPTVI
>V156RF-CABD02196521.1-igkv |(5557, 5857)|2.99899600001|(1.000,1.000,0.999)|-1
ARCDIQMTQSPSSLSASVGDRVTITCRASQGISKWLAWYQQKPGKAPKRLIYAASSLESG
VPSRFSGSGSGTEFTLTISSLQPEDFATYYCLQYNSYP
>V157RF-CABD02196542.1-igkv |(3007, 3305)|2.74573147928|(0.993,0.842,0.998)|-1
SRGEIVLTQSPDFQSVTPKEKVTITCRASQSIGSSLHWYQQKPDQSPKLLIKYASQSISG
VPSRFSGSGSGTDFTLTINSLEAEDAATYYCQQSSSL
>V158RF-CABD02196545.1-igkv |(4900, 5202)|2.46142853707|(0.948,0.767,0.885)|-1
SSGDIVMTQTPLSLPVTNGEPASISCRSSQSLVHSDGNTYLNWIQQRPGQPPRLLIYKVS
NRFSGVPDRFSGSGAGTDFTLKISRVEAEDVAVYYCTQG
>V159RF-CABD02196547.1-igkv |(2239, 2541)|2.96394028297|(0.996,0.984,0.985)|-1
SSGDVVMTQSPLSLPVTLGQPASISCRSSQSLVYSDGNTYLNWFQQKPGQSPRRLIYKVS
NRDSGVPDRFSGSGSGTDFTLEISRVEAEDVGVYYCMQG
>V160RF-CABD02196553.1-igkv |(790, 1090)|2.99698000014|(1.000,0.998,0.999)|-1
ARCDIQLTQSPTSLSASVGDRVTITCQASQGISNNLAWYQQKPGKVPKLLIYSASSLQSG
VPSRFSGSGSGTDFTLTISSLQPEDVATYYCQRTYNAP
>V161RF-CABD02196556.1-igkv |(192, 492)|2.994900005|(1.000,1.000,0.995)|-1
ARCDIQMTQSPSSLSASVGDRVTITCRASQSVSNYLSWYQQKPGKAPKLLIYAASSLQSG
VPSRFSGSGSGTDFTLTISSLQPEDFATYYCQHGYGTP
>V162RF-CABD02196559.1-igkv |(8610, 8928)|2.59249117414|(0.997,0.811,0.931)|-1
SSGDIVMTQTPLSLPVTPGQPASISCRSSQSLLDSDDGNTYLYWYLQKPGQSPQLLIYEV
SNRASGVPDRFSGSGSGTDFTLKISRVEAEDVGVYYCMQSRELP
>V163RF-CABD02196901.1-igkv |(2814, 3114)|2.98632422844|(1.000,0.987,1.000)|-1
DRCDIQMTQSPSSLSASVGGRVTITCRASQGISNNLNWYQQKPGKTPKLLIYAASSLQSG
IPSRFSDSGSGTDYTLTISSLQPEDFAAYYCQQSDSTP
>V164RF-CABD02196902.1-igkv |(2361, 2661)|2.23517297065|(0.956,0.878,0.683)|-1
AKCAIQMTQSPSSLPASTGDRVTITCQASQGIGSYLNWYQQKPGKSPKLLIYYASYLQSG
IPSRFSGSGSGTDFTLTIDCLQPEDFATYYCEQSYGTP
>V165RF-CABD02320526.1-igkv |(17600, 17903)|1.9505613599|(0.999,0.535,0.994)|-1
TTGEIVLTQSPATLSSSPGERATLSCRASQSVSSSYLAWYQQKPGQAPRLLIYDASSRAT
GIPDRFSGSGSGTDFTLTISRLEPEDFAVYYCQQYSNWP
>V166RF-CABD02337338.1-trgv |(1057, 1370)|2.97722818506|(0.999,0.992,0.987)|-1
SQKSSNLEGRTKSVTRQTGSSAEITCDLTVTNTFYIHWYLHQEGKAPQRLLYYDVSTARD
VLESGLSSGKYYTHTPRRWSWILRLQNLIENDSGVYYCATWD
>V167RF-CABD02337338.1-trgv |(5430, 5730)|2.1015556192|(0.835,0.671,0.736)|-1
SQKSSNLEGRTKSVTRPPGSSAVITCDLPVENAAYIHWYLHQEGKAPQRLLYYDSYNSRV
VLESGISREKYHAYASTGKSLKFIVENLIEHDSGVYYC
>V168RF-CABD02337341.1-trgv |(2313, 2626)|2.93142849428|(0.993,0.961,0.982)|-1
SQKSSNLEGRTKSVIRQTGSSAEITCDLDGGSTGYIHWYLHQEGKAPQRLQYYDSYNSKV
VLESGVSPGKYYTYTSTRKNLRLILRNLIENDSGVYYCATWD
>V169RF-CABD02379427.1-igkv |(3027, 3327)|3.0|(1.000,1.000,1.000)|-1
ARCDIQMTQSPSSLSASVGGRVTITCRASQGISNNLNWYQQKPGKTPKLLIYAASSLQSG
IPSRFSDSGSGTDYTLTISSLQPEDFAAYYCQQSDSTP
>V170RF-CABD02379503.1-igkv |(6201, 6501)|2.99393200206|(0.999,0.995,1.000)|-1
ARCDIQMTQSPSSLSASVGGRVTITCRASQDISNNLNWYQQKPGKTPKLLIYAASSLQSG
IPSRFSDSGSGTDYTLTISSLQPEDFAAYYCQQSDSTP
>V0RF-AQIB01018214.1-trgv |(163723, 164036)|2.96886891211|(1.000,1.000,0.972)|1
SQKSSNLEGRTKSVTRPTGSSAEITCDLPEVSSFYIHWYLHQEGKAPQRLLYYDTSNSRV
VLESGISSGKYDSYGSTRRNLRLILRNLIENDSGVYYCANWD
>V1RF-AQIB01018215.1-trgv |(1470, 1783)|2.93056728515|(0.995,0.991,0.952)|1
SQKSSNLEGRTKSVTRPTGSSAEITCDFSGDSNFYIHWYLHQEGKAPQRLLYYDVSNSRD
VLESGLSPGKYYTHTRKRWSWILILRNLIENDSGVYYCANWN
>V2RF-AQIB01018217.1-trgv |(6282, 6595)|2.93748729347|(0.994,1.000,0.951)|1
SQKSSNLEGRTKSVTRPTGSSAEITCDLPEVSSFYIHWYLHQEGKAPQRLLYYDSSNSRV
VLESGISSGKYNSYESTRRSLRLRLQNLIENDSGVYYCANWD
>V3RF-AQIB01144236.1-igkv |(33225, 33525)|2.99598000014|(0.999,1.000,0.997)|1
ARCDIQMTQSPSSLSASVGDRVTITCRASQGINKELSWYQQKPGKAPTLLIYAASSLQTG
VPSRFSGSGSGTDFTLAISSLQPEDVATYYCLQDYTTP
>V4RF-AQIB01144236.1-igkv |(99005, 99323)|2.76463305256|(0.995,0.911,0.913)|1
SSGDIVMTQTPLSLPVTPGEPASISCRSSQSLLDSDDGNTYLDWYLQKPGQSPQLLIYEV
SNRASGVPDRFSGSGSDTDFTLKISRVEAEDVGVYYCMQTIEYP
>V5RF-AQIB01144237.1-igkv |(7567, 7881)|2.27470914472|(0.857,0.658,0.924)|1
TSGDILLTQTPLSLPVTPGQLASISCRSSQSLLHSNGNTYLHWYLQEPGQSPQLLIYEVS
NRASGVPDRFSGSGSDTDFTLKINLVEAEDVGVYYCMQLHNGP
>V6RF-AQIB01144237.1-igkv |(12519, 12834)|2.02957440061|(0.911,0.918,0.571)|1
SSGDIVMTQTPLSLPVTLGEQASISCRSSQSLVYSDGKTYLNWYLQKPGQSPQLLMYLVS
KRASGVPDRFSGRGSGTDFTLKISRVEAEDVGVYYCMQALRSP
>V7RF-AQIB01144237.1-igkv |(20593, 20893)|2.38262961843|(0.971,0.937,0.713)|1
ARCDIQMTQSLSSLSASVGDRVTITCRASQGINNELAWYQQKPGKAPMLLLYSGSSLHTG
VPSRFSGSGSGTDFTLAISSLQPEDVAPYYCLQDYTTP
>V8RF-AQIB01144237.1-igkv |(28737, 29052)|2.26906806463|(0.992,0.678,0.937)|1
SSGDIVMTQTPLSLPVTPGEPASISCRSSQSLLDSYGYTNLNWYLQKPGQSPQLLIYLGS
NRASGVPDRFSGSGSGTDFTLKISGVEAEDVGVYYCMQGIQLP
>V9RF-AQIB01144240.1-igkv |(12918, 13233)|2.9415734465|(0.997,0.961,0.989)|1
TSGDIVMTQTPFSLPVNPGEPASISCRSSQSLSDSDGYTYLYWYLQKPGQSPQLLIYLGS
NRASGVPDRFSGSGSGTDFTLKISRVEAEDVGVYYCMQGIQLP
>V10RF-AQIB01144242.1-igkv |(6923, 7238)|2.24724005757|(0.981,0.738,0.828)|1
SSGDIVMTQTPLSLPVTPGEPASISCRSSQSLLHSDGYTYLYWYVQKPGHSPQLLIYLVS
NRASGVPDRFSGSGSGTDFTLKISRVEAEDVGVYYCLQGIQLP
>V11RF-AQIB01144242.1-igkv |(18230, 18530)|2.98096052424|(1.000,0.984,0.998)|1
ARCDIQMTQSPSSLSASVGDRVTITCQGSQSLSNFLNWYQQKPGKIPKLLIYRASSLQSG
IPSRFSGSGSGTDYTLTISSLQPEDFATYYCQQGYSYP
>V12RF-AQIB01144242.1-igkv |(33676, 33991)|2.72243751013|(1.000,0.834,0.993)|1
TSGDIVMTQTPLSLPVTPGEPASISCRSSQSLLHSNGYTYLDWYVQKPGQSPQLLIYLVS
SRASGVPDRFSGSGSGTDFTLKISRVEAEDVGVYYCMQGTQLP
>V13RF-AQIB01144243.1-igkv |(9275, 9590)|2.39396851456|(0.977,0.706,0.966)|1
TSGDIVMTQIPLSLPVTPGEPASISCRSSQSLLHSGGKTYLYWYLQKPGQSPQLLIYELS
NRASGVPDRFSGSGSGTDFTLKISGVEAEDVGVYYCMQGIQLP
>V14RF-AQIB01144243.1-igkv |(18759, 19059)|2.99899600001|(1.000,0.999,1.000)|1
ARCDIQMTQSPSSLSASVGDRVTITCQASQGITNDLAWYQQKPGETPKLLIYEASSLQSG
IPSRFSGSGSGTDFTLTISSLQPEDFATYYCQHYYSTP
>V15RF-AQIB01144243.1-igkv |(52384, 52684)|2.99796800026|(0.998,1.000,1.000)|1
ARCDIQMTQSPSSLSASVGDRVTISCRASQNIYSNLAWYQQKPGKTPKLLIYAASSLQSG
IPSRFSGSGSGTDFTLTISSLQPEDYATYYCQHHYGTP
>V16RF-AQIB01144244.1-igkv |(12759, 13074)|2.41713427815|(0.973,0.705,0.990)|1
SSGDIVMTQTPLSLPVTPGEPASISCRSSQSLLHSDGRTYLYWYLQKPGQPPRLLIYTVS
NRFSGVPDRFSGSGSGTDFTLKISRVEAEDVGVYYCMQALQNP
>V17RF-AQIB01144247.1-igkv |(9074, 9389)|2.55885607075|(0.977,0.761,0.992)|1
SIGDIVMTQTPLSLPVTPGEPASISCRSSQSLLHSNGNTYLYWYLQKPGQPPQLLIYRVS
NRFSGVPDRFSGSGSGTDFTLKISRVEAEDVGVYYCMQALQTP
>V18RF-AQIB01144251.1-igkv |(6848, 7148)|2.96274467291|(0.992,0.997,0.975)|1
ARCDIQMTQSPSSLSASVGDRVTITCHASQGISNWLAWYQQKPGKAPKLLIYYASNLETG
VPSRFSGSRSGTDFTVTISSLQPEDIATYYCQQYDNFP
>V19RF-AQIB01144257.1-igkv |(11968, 12268)|2.95381238217|(0.995,1.000,0.963)|1
ARCDIQMTQSPSSLSASVGDRVTITCRASQGINNYLSWYQQKPGKAPKPLIYYASSLETG
VPSRFSGSGSGPDYTLTISSLQPEDIATYYCQQYDNFP
>V20RF-AQIB01144258.1-igkv |(1398, 1700)|2.47958358676|(0.878,0.769,0.879)|1
FSADVVMTQSPLSLPVTPGQPASITCRSSQSLLHSNGNTYLNWFLQKPGQPPRRLIYTVS
NRDSGVPDRFSGSGAGTDFTLKISRVEAEDVGVYYCMQV
>V21RF-AQIB01144263.1-igkv |(12287, 12589)|2.41190594056|(0.956,0.710,0.961)|1
SSGDVVMTQSPLSLPVTLGQPVSISCRSSQSLVHSDGKTYLNWLQQKPGQPPRLLIYQVS
NRYSGVPDRFSGSGAGTDFTLKISRVEAEDVGVYYCMQG
>V22RF-AQIB01144263.1-igkv |(20713, 21015)|2.59199862631|(0.958,0.831,0.886)|1
SSGDVVMTQSPLSLPVTPGQPASISCRSSQSLVHSDGKTYLNWFQQKPGQPPRRLIYQVS
SRDSGVPDRFSGSGAGTDFTLKISRVEAEDVGVYYCVQG
>V23RF-AQIB01144263.1-igkv |(50626, 50941)|2.6352637069|(0.998,0.796,0.992)|1
SSGDIVMTQTPLSLPVTLGEPASISCRSSQSLVYSDGKTYLDWYLQKPGQSPQLLIYYGS
NRASGVPDRFSGSGSGTDFTLKISSVEAEDVGVYYCMQAIQTP
>V24RF-AQIB01144263.1-igkv |(59031, 59331)|2.69732345639|(0.993,0.952,0.844)|1
TRCAIQMTQSPSSLSASVGDRVTITCWASQSIGSNLAWYQQKPGKVPKLLIYAASTLQSE
VPSRFSGSGSGTDFTLSISSLQPEDVATYYCQKCDSAH
>V25RF-AQIB01144263.1-igkv |(96224, 96526)|2.47228119253|(0.932,0.873,0.775)|1
STGDVVMTQSPLSLPVTPGEPASISCRSSQSLLHSSGNTYLSWFQQKPGQSPRRLIYKVS
NRDSGVPDRFTGSGAGTDFTLKISRVEAEDVGVYYCMEG
>V26RF-AQIB01144264.1-igkv |(29331, 29633)|2.47228119253|(0.932,0.873,0.775)|1
STGDVVMTQSPLSLPVTPGEPASISCRSSQSLLHSSGNTYLSWFQQKPGQSPRRLIYKVS
NRDSGVPDRFTGSGAGTDFTLKISRVEAEDVGVYYCMEG
>V27RF-AQIB01144264.1-igkv |(45678, 45976)|2.88450961098|(0.999,0.914,1.000)|1
SKGEIVLTQSPAFRSVTLKEKVTITCQASQSIGSSLHWYQQKPDQSPKLLIKYASQSISG
VPSRFSGSGSGTDFTLTINSLEAEDAATYYCQQSSSF
>V28RF-AQIB01144264.1-igkv |(72133, 72421)|2.95282941374|(0.998,0.962,0.998)|1
IVLTQSPATLSLSPGETATLSCRASQSVGSSLAWYQQKPGQVPRLLIYGASSRATGIPDR
FSGSGSGTEFTLTISSLQPEDFAVYYCQKYSSSP
>V29RF-AQIB01144264.1-igkv |(77620, 77920)|2.47245650163|(0.962,1.000,0.722)|1
VRCDIQMTQSPSFLSASVGDRVTITCQASQSISNDLAWYQQKPGKSPTLLICDATNLHTG
VPSWFSGSGSGADYYLTISSLELEDFAAYYCQQEYSYP
>V30RF-AQIB01144264.1-igkv |(103470, 103785)|2.00930917501|(0.773,0.594,0.763)|1
SSGDIVMIQTPLSLPVTPGEPASISCRSSQNLLHSDGNTYLHWYLQKPGQSPQLLIYGGS
NRFAGVPDRFSGSGSATDFTMKISRVEAKDVGVYYCMQGIQFP
>V31RF-AQIB01144265.1-igkv |(9151, 9443)|2.8824976111|(0.998,0.913,1.000)|1
SRGDIVMTQSPAFVSVTPGEKVTITCQASEGISNYLHWYQQKPDQAPKLLIQYASQSISG
VPSRFTGSGSGTDFTFTISSLEVEDAATYYCQQGN
>V32RF-AQIB01144265.1-igkv |(25389, 25680)|2.94700655222|(0.997,0.987,0.967)|1
DIQMTQSPSSLSASVGDRVTITCQASQSFSSSLAWYQQKPGKAPKLLIYAASSLQSGVPS
RFSGSKAGTDFTLTISSLQPEDVATYYCQQYYSTP
>V33RF-AQIB01144265.1-igkv |(40570, 40862)|2.99799600001|(0.999,1.000,0.999)|1
AKCDIQMTQSPSSLSASVGDRVTITCRASQTISSYLAWYQQKPGKVPKLLIYAASSLESG
IPSRFSGSGSGTEFTLTISSLQPEDFATYYCQQHN
>V34RF-AQIB01144265.1-igkv |(60992, 61284)|2.97470402421|(0.991,0.986,0.998)|1
ARCDIQMTQSPSSLSASVGDRVTVTCRASQGISNYLSWYQQEPGKAPKLLIYAASSLESG
VPSRFSGSGSGTEFTLTISSLQPEDFATYYCLQHN
>V35RF-AQIB01144265.1-igkv |(75665, 75964)|2.99899600001|(1.000,1.000,0.999)|1
TTGEIVMTQSPATLSLSPGERATLSCRASQSVSSYLAWYQQKPGQAPRLLIYGASSRATG
IPDRFSGSGSGTEFTLTISSLEPEDVGVYYCQQYNNWN
>V36RF-AQIB01144265.1-igkv |(84906, 85206)|2.98867205249|(0.999,1.000,0.990)|1
ARCDIQMTQSPSSLSASVGDRVTITCRASQGISNYLNWYQQKPGKAPKLLIYSASRLQSG
VPSRFSGSGSGTEFTLTISSLQPEDFATYYCEQFKNYL
>V37RF-AQIB01144269.1-igkv |(1739, 2027)|2.64289102854|(0.887,0.908,0.854)|1
IVMTQSPATLSLSPGETTTLSCSASQSVGSYLAWYQQKPGQAPKLLIHSAYFRATGIPDR
FSGSGSRTVFTLTISSLEPEDVGVYYCQQYNDLP
>V38RF-AQIB01144269.1-igkv |(40447, 40747)|2.99385601037|(1.000,1.000,0.994)|1
ARCDIQLTQSPSSLSASVGDRVTITCRASQGISSYLAWYQQKPGKAPKLLIYDASNLQSG
VPSRFSGSGSGTEFTLTISSLQPEDFATYYCQQRNSLP
>V39RF-AQIB01144273.1-igkv |(1759, 2059)|2.99799200002|(1.000,0.999,0.999)|1
ARCDIQMTQSPSSLSVSVGDRVTITCRASQGISNYLSWYQQKPGKAPKLLIYSASSLESG
VPSRFSGSGSGTDYTLTISSLQPEDFAAYYCLQYQSIP
>V40RF-AQIB01144273.1-igkv |(12272, 12572)|2.6357253622|(0.970,0.903,0.843)|1
TTREIVFTQSPATLSLSPGERATLSCRASQSVGSSLAWYQQKSGQAPRLLVYHASSRATG
IPARFSGSGSGTDFTLTISSLEPEDVGVYYCQKYNDWP
>V41RF-AQIB01144273.1-igkv |(55407, 55707)|2.95410367172|(0.992,0.999,0.966)|1
ARCDIQMTQSPSSLSASVGDRVTITCRASQGISNALAWYQQKPGKVPKLLIYAASSLQSG
LPSGFSGSGSGTEFTLTISSLQPEDFATYYCQQGYSTP
>V42RF-AQIB01144273.1-igkv |(67090, 67390)|3.0|(1.000,1.000,1.000)|1
ARCDIQMTQSPSSLSASVGDRVTITCRASQGISNNLAWYQQKPGKAPKLLIYDATTLQSG
VPSRFSGSGSGTEFTLTISSLQPEDFATYYCQQYNSYP
>V43RF-AQIB01144273.1-igkv |(86428, 86728)|2.71676090883|(0.957,0.928,0.867)|1
TTGEIVMTQSPATLSLSPGETATLSCKTSQSVGSKLAWYQQKPGQAPRLLIYGASSRATG
IPARFSGSGSGTDFTLAISSLEPEDVGAYYCQETSSLS
>V44RF-AQIB01144274.1-igkv |(43133, 43433)|2.82905544896|(0.964,0.921,0.952)|1
ARCDIQMTQSPSSLSASVGDTVTITCPASQGISSYLNWYQHKPGKAPKLLIYYATTLQSG
VPSRFSGSGSGTEFTLTISSLQPEDFAAYYCQQYKSLP
>V45RF-AQIB01144274.1-igkv |(49577, 49877)|2.997|(0.999,0.999,0.999)|1
ARCDIQMTQSPSSLSASVGDKVTITCHASQGISSWLAWYQQKPGKAPKLLIYKASSLQSG
VPSRFSGSGSGTDFTLTISSLQPEDFATYYCQQITSAP
>V46RF-AQIB01144274.1-igkv |(65782, 66082)|2.15275934884|(0.981,0.606,0.997)|1
TTGEIVMTQSPATLALSPGERATLSCRTSQSVSSRLAWYQQKPGQAPRLLIYDASSRATG
IPDRFSGSGSGTEFTLTISSLEPEDVGVYYCQQDYSWP
>V47RF-AQIB01144276.1-igkv |(25002, 25302)|2.96532422844|(0.993,0.980,0.993)|1
ARRDIQMSQSPSSLSASVGDRVTITCHASQGISSWLAWYQQKPGKAPKLLIYKASSLQSG
VPSRFSGSGSGTDFTLTISSLQPEDFATYYCLQYDSNP
>V48RF-AQIB01144276.1-igkv |(29444, 29742)|2.28521148103|(0.903,0.650,0.984)|1
TTGEIVMTQSPATLALSPGERATLSCRASQSVSSRLAWYQQKPGQAPRLLIYDASSRATG
IPDRFSGSGSGTDFTLTISSLEPEDVAVYFCQQESNW
>V49RF-AQIB01144276.1-igkv |(40183, 40483)|2.99174403277|(1.000,1.000,0.992)|1
ARCDIQMTQSPSSLSASVGDRVTITCQASQGISNYLAWYQQKPGKAPKLLIYYASTLQSG
VPSRFSGSGSGTEFTLTISSLQPEDFATYYCQQHNSNP
>V50RF-AQIB01144276.1-igkv |(56521, 56821)|3.0|(1.000,1.000,1.000)|1
ARCDIQMTQSPSSLSASVGDRVTITCQASQGISNYLAWYQQKPGKAPKPLIYKASTLESG
VPSRFSGSGSGTEFTLTISSLQPEDFATYYCQQRNSYP
>V51RF-AQIB01144282.1-igkv |(3113, 3400)|2.59446889698|(0.981,0.782,0.978)|1
TVVTQSPATLSLSPGERATVSCRTSQSVSNRLAWYQQKPGQAPRLLIYGASNRATGIPAR
FSGSGSGTDFTLTISSLELEDAAVYYCQQDNDWK
>V52RF-AQIB01144282.1-igkv |(46328, 46640)|2.94836106127|(0.992,0.985,0.973)|1
CNGDIVLTQSPASLAVSPGQKATITCRASESVSLFGINFIHWYQQKPGQPPKLLIYQASN
KDTGVPARFSGSGSGTDFTLTINPVEADDAANYYCLQSKTSP
>V53RF-AQIB01144282.1-igkv |(64268, 64559)|2.94507598606|(0.994,0.959,0.997)|1
IVLTQSPTSMAVSQGERVTISCTASSSISTSYLHWYQQKPGFPPRLLVYTTSSLASGVPA
RFSGSGSGTSYTLTISSMEAEDAANYYCQQGSSIP
>V54RF-AQIB01146109.1-igkv |(79026, 79336)|1.81784087315|(0.612,0.728,0.547)|1
SLSQPVLTQSPSASASLGASVKLTCTLSSGHSSYNIAWHQQQQGKAPRYLMRLNSDGSHS
KGDGIPDRFSGSSSGADRYLTISNLQSEDEADYYCHTWDTG
>V55RF-AQIB01146122.1-iglv |(12217, 12527)|2.92099830469|(0.976,0.950,1.000)|1
SWAEVVFTQPHSVSGSPGQTVTISCTRSSGSIDSSFVYWYQQRPGSAPTTVIYNDNRRPS
GVPDRFSGSIDSSSNSASLTISGLKSEDEADYYCQSDDSSG
>V56RF-AQIB01146122.1-iglv |(69507, 69814)|2.99899600001|(1.000,1.000,0.999)|1
SWAQSVLTQPPSVSGAPGQRVTISCTGSSSNIGGYNVHWYQQLPGTTPKLLIYGNNQRPS
GVSDRFSGSKSGTSASLTITGLQSEDEADYYCQSYDSSLS
>V57RF-AQIB01146122.1-iglv |(92188, 92498)|2.34467512139|(0.974,0.683,0.975)|1
SLSQPVLTQPTSLSASPGASARLTCTLRSGISVGSYRVLWYQQKPGNPPRYLLNYHTDSD
KDQGSGVPSRFSGSKDASANAGILLISGLQSEDEADYYCAI
>V58RF-AQIB01146122.1-iglv |(97013, 97322)|2.99080001921|(0.999,0.992,1.000)|1
CWAQSVLTQPPSASGAPGQSVTISCSGSSSNIGSNSVYWYQQFPGTAPKLLIYYSNQRPS
GVPDRFSGSKSGTSASLTISGLQSEDEADYYCAAWDDSLSG
>V59RF-AQIB01146122.1-iglv |(110604, 110914)|2.39431043033|(0.994,0.952,0.718)|1
SLSQPVLTQPASLSASPGASASLTCTFSGGINVAGYYIYWYQQKPGSPPRYLLRYKSDSE
KHQGSGVPSRFSGSKDASANTGILRISGLQSEDEADYYCAI
>V60RF-AQIB01146122.1-iglv |(126866, 127176)|2.72621708202|(0.973,0.848,0.966)|1
SLSQPVLTQPTSLSASPGASVRLTCTLRSGISVGGYNIHWYQQKPGSPPRYLLYYYSDSN
KGQGSGVPSRFSASKDASANAGILLISGFQSEDEADYYCTT
>V61RF-AQIB01146122.1-iglv |(131665, 131974)|2.98972803289|(1.000,0.998,0.992)|1
SWAQSVLTQPPSASGAPGQSVTISCSGSSSNIGSNYVSWYQQLSGKAPKLLIYKNSQRPS
GVPDRFSGSKSGTSASLTISGLRSEDEADYYCAAWDDSLNG
>V62RF-AQIB01146122.1-iglv |(149998, 150308)|2.93889226661|(0.992,0.985,0.965)|1
SLSQPVLTQPASLSASPGASARLSCTLSSGINVGSYSIYWYQQKPGSPPRYLLYYYSDSS
KGQGSGVPSRFSGSKDASANAGLLLISGLQSEDEADYYCAI
>V63RF-AQIB01146122.1-iglv |(159131, 159440)|2.99289600501|(0.999,1.000,0.994)|1
SWAQSVLTQPPSVSGAPGQRVTISCTGSSSNIGGYYVQWYQQLSGTAPKLLIYGNNQRPS
GVSDRFSGSKSGTSASLTITGLQSEDEADYYCETWDNSLNG
>V64RF-AQIB01146122.1-iglv |(164963, 165270)|2.86616198126|(0.921,0.999,0.988)|1
SWAQSVLTQPPSVSGAPGQRVTISCTGSSSNIGGYDVHWYQQLPGTTPKLLIYDNNKRPS
GVSDRFSGSKSGTSASLTITGLQTEDEADYFCQSYDSSLG
>V65RF-AQIB01146122.1-iglv |(187790, 188100)|2.80771714775|(0.993,0.952,0.902)|1
SLSQPVLTQPASLSASPGASASLTCTFSGGINVAGYYIYWYQQKPGSPPRYLLWYKSDSD
KHQGSGVPSRFSGSKDASANTGILRISGLQSEDEADYYCAI
>V66RF-AQIB01146123.1-iglv |(2181, 2490)|2.93504987297|(0.987,0.965,0.985)|1
SWAQSVLTQPRSASEATRKSITISCSGSSSNIGSNYVSWYQQLPGTAPKLLIYYNDWRAS
GVSDRFSGSKSGTSASLAISGLQTEDEADYYCAAWDDSLSG
>V67RF-AQIB01146133.1-iglv |(15765, 16070)|2.48831690018|(0.983,0.733,0.994)|1
SVASYELTQPPSVSVSPGQTAKITCSGDTLAKIYARWFQQKPGQAPVLVIYKDSERPSGI
PERFSGSSSGTTVTLTISGAQAEDEADYYCYSGDDNNLTV
>V68RF-AQIB01146133.1-iglv |(25439, 25742)|2.99275601537|(0.994,1.000,0.999)|1
SWAQSALTQSPSVSGSPGQSVTISCTGTSSDVGGYNYVSWYQQHPGKAPKLMIYEVSKRP
SGVSDRFSGSKSGNTASLTISGLQAEDEADYYCCSYTTS
>V69RF-AQIB01146133.1-iglv |(37913, 38216)|2.67005903184|(0.977,0.884,0.880)|1
SAASYDLTQPHSVSVSPGQTARITCGGDDIGSEAVHWYQQKPAQAPVLVIYDNSDRPSGI
PERFSGSNSGNTATLTISGVEAGDEADYYCQVWDISSDH
>V70RF-AQIB01146133.1-iglv |(45024, 45327)|2.00578514529|(0.970,0.727,0.728)|1
SVVSSELTQEPALSVALGHTVTMTCQGDSLSSYYASWYQQKPGQVPVLVIYGNTNRPSGI
SGRFSGSWSGNTASLTITGAQVEDEADYYCGSWDNSANH
>V71RF-AQIB01146135.1-iglv |(5642, 5953)|2.10273429484|(0.932,0.599,0.930)|1
SAASYELTQPPSVSVSPGQMARITCRGDSIGSKYVQWFQQKPAQAPVLVIYSDSKRPSGI
PERFSGSNSGNTATLTISGVQAGDEADYYCQVWDSSSKHATV
>V72RF-AQIB01146136.1-iglv |(1665, 1968)|2.99280401921|(1.000,0.993,1.000)|1
SWAQSAPTQPRSVSGSPGQSVTISCTGTSSDIGGYNYVSWYQQHPGTAPKLMIYGVSNRP
SGVSDRFSGSKSGNTASLTISGLQAEDEADYYCCSYTTS
>V73RF-AQIB01146137.1-iglv |(9886, 10183)|2.9128099056|(0.967,0.959,0.989)|1
SVASYELTQPPSVSVSPGQTARITCSGDVLKENYADWYQQKPGQAPVLLIYEDSKRPSGI
PERFSGSTSGDTTTLTISSTLSEDGADYYCFSGDENN
>V74RF-AQIB01146137.1-iglv |(18233, 18536)|2.64299500254|(0.998,0.819,0.954)|1
SAVSYELTQPRSVSVSPGQTARITCGGDSIGSKYVHWYQQKPAQAPVLVIYDNSNRPSGI
PERFSGSNSGNTATLTISGVQAGDEADYYCQVWDSSSKH
>V75RF-AQIB01146137.1-iglv |(25864, 26167)|2.97874003277|(0.996,0.995,0.988)|1
SVVSSELTQDPAVSVALGQTVRITCQGDSLRSSYASWYQQKPGQAPVLVVYGNNNRPSGI
PERFSGSSSGNTASLTITGAQVEDEADYYCNSWDSSGNH
>V76RF-AQIB01146138.1-iglv |(15714, 16017)|2.9530935653|(0.976,0.982,0.997)|1
SWAQAALTQPPSVSKSLGQSVTISCTGTSSDIAAYNDVSWYQQHPGTAPRLLIYSVSNRP
SGVSDCFSGSKSGNTASLTISGLQAEDEADYYCCSYRSG
>V77RF-AQIB01146138.1-iglv |(24129, 24432)|2.64299500254|(0.998,0.819,0.954)|1
SAVSYELTQPRSVSVSPGQTARITCGGDSIGSKYVHWYQQKPAQAPVLVIYDNSNRPSGI
PERFSGSNSGNTATLTISGVQAGDEADYYCQVWDSSSKH
>V78RF-AQIB01146140.1-iglv |(2757, 3067)|2.88017772754|(0.999,0.912,0.999)|1
SWAQAALTQPHSVSGSPGQSVTISCTGTSSDIGGYNRVSWYQQHPGKAPKLMIYEVSNRP
SGVSDRFSGSKSGNTASLTISGLQAEDEADYYCSSYASSSN
>V79RF-AQIB01146140.1-iglv |(26014, 26324)|2.98376801985|(0.996,0.999,0.989)|1
SWAQAALTQPPSVSGSPGQSVTISCTGTSSDVGGYNYVSWYQQHPGKAPKLMIYEVNKRP
SGVSDRFSGSKSGNTASLTISGLQAEDEADYYCSSYAGSNT
>V80RF-AQIB01146141.1-iglv |(2344, 2653)|2.97850011724|(0.996,0.985,0.998)|1
SVASYELTQPPSVSVSPGQTARITCSGDALPDNYAYWFQQKPGQSPVLIIYEDSKRPSGI
PERFSGSSSGTVATLTISGAQVEDEADYYCYSADSSGNQHS
>V81RF-AQIB01146141.1-iglv |(10119, 10425)|1.87690127917|(0.901,0.528,0.877)|1
SVASYELTQPLSVSVALGQMARITCGGNNIGRKNVQWYQQKPDQAPVLVIYQDSKRPSGI
PERFSGSNSGNTATLTIDRAQAGDEADYYCQVWDSSTAHS
>V82RF-AQIB01146141.1-iglv |(13491, 13794)|2.99383600705|(0.995,0.999,1.000)|1
SWAQAAPTQSPSVSGSAGQSVTISCTGTSSDIGGYNRVSWYQQHPGKAPKLMIYEVSKRP
SGVSDRFSGSKSGNTASLTISGLQAEDEADYYCSSYAGS
>V83RF-AQIB01146141.1-iglv |(50602, 50912)|2.76786491212|(0.914,0.915,0.942)|1
SWAQSAPIQSPSVSGSLGQSVTISCTGTSSDIGRYNYVSWYRQQPGTTTKLTMYNVNTRP
SGVSDRFSGSKSGNTASLTISGLQAEDEADYYCSSYETSDT
>V84RF-AQIB01153480.1-ighv |(7301, 7610)|2.8734581712|(0.996,0.943,0.953)|1
VLSQLQLQESGPGLVKPSETLSLTCAVSGGSISSYWWGWIRQAPGKGLEWIGNIYGSGGS
TEYNPSLKSRVTISKDTSKNQFSLKLSSVTAADTAVYYCAR
>V85RF-AQIB01153481.1-ighv |(29869, 30184)|2.99498000014|(0.998,0.997,1.000)|1
VQCEVQLVESGGGLIQPGGSLRLSCAASGFTFSDYAMSWVRQASGKGLEWVGYIRSKSNN
YATEYAASVKGRFTISRDDSKNTLYLQMSGLKTEDTAVYYCTI
>V86RF-AQIB01153482.1-ighv |(4668, 4983)|3.0|(1.000,1.000,1.000)|1
VQCEVQLVESGGGLVQPGGSLRLSCAASGFTFSDHYMQWVRQAPGKGLEWVGFIRSKAYG
GTAEYAASVKGRFTISRDDSKSITSLQMNSLKTEDTAVYYCTR
>V87RF-AQIB01153482.1-ighv |(18678, 18987)|3.0|(1.000,1.000,1.000)|1
VQCEVQLVESGGGLVQPGGSLKLSCAASGFTFGDYAMSWVRQAPGKGLEWVSSISNTGKT
TYYADSVKGRFTISRDNAKNSLSLQMNSLRAEDTAVYYCAR
>V88RF-AQIB01153482.1-ighv |(23774, 24083)|2.58425901963|(1.000,0.772,1.000)|1
VQGEVQLVESGGGLAKPGGSLRLSCAASGFTFSNYYMHWVRQAPGKGLEWVSSINTGGGS
TYYADSVKGRFTISRDNSKNTLSLQMDSLRAEDTAVYYCAK
>V89RF-AQIB01153484.1-ighv |(24203, 24512)|2.18699339217|(0.716,0.708,0.779)|1
AQSQVQLVQPGAEMRKPGDSVKVSCKASGYTFTNHDVDWVRQAPGQGPEWMGGINTNTGG
TSCAQTFQGRVTMTRDTTTSTAFMELSSLRSEDTAVYYCAR
>V90RF-AQIB01153484.1-ighv |(33458, 33767)|2.73855123877|(0.935,0.983,0.855)|1
AHSQVQLVQSGAEIKQPGASVKLSCKASGYTFTSYYMHWVRQAPGQGLEWIGLISPYNGN
KGYAQNFQGRVTITTDTSTSTGYMELSSLRSEDTAVYYCTR
>V91RF-AQIB01153485.1-ighv |(161, 470)|2.71358033912|(0.949,0.830,1.000)|1
VQGEVQLVESGGGLAKPGGSLRLSCAASGFTFSDYHMHWVRQAPGKGLQWVSAINSGGGS
TWYADSVKGRFTISRENAKNTLYLQMDSLRAEDTAVYYCAK
>V92RF-AQIB01153486.1-ighv |(413, 728)|2.99088400513|(0.998,0.993,1.000)|1
VQCEVQLVESGGGLVQPGGSLRLSCAASGFTFSDYAMHWVRQAPGKGPEWVGFIRSKAYG
GTAEYAASVKGRFTISRDDSKNTAYLQMNSLKTEDTAVYYCTI
>V93RF-AQIB01153489.1-ighv |(27642, 27951)|2.61373807534|(0.922,0.931,0.810)|1
AHSEVQLVQSGAEVRKPGASVKVSCKVSGYTLTELSMHWVRQAPGKGLEWMGGVDPVYGE
TIHAEKFQGRVTMTEDTSTDTAYMELSSLRSEDTAVYYCAR
>V94RF-AQIB01153491.1-ighv |(2235, 2549)|1.79489412938|(0.922,0.711,0.624)|1
VLSQVTLKESGPALVKPTQTLTLTCTFSGFSLTTSGMGVGWIRQPPGKALEWLAHIYWDD
DKRYSPSLKSRLTISKDTSKNQVVLTMTNMDPVDTATYYCARR
>V95RF-AQIB01153491.1-ighv |(11513, 11822)|2.4244696708|(0.930,0.969,0.709)|1
VHSQVQLVQSGAEVKKPGASVKLSCKASGFTLGSYAISWVRQAPGQGLEWMGGIIPLVGI
TNYAQKFQGRVTITADTSTTTAYMELSSLRSEDTAVYYCAR
>V96RF-AQIB01153491.1-ighv |(20597, 20906)|2.35345434754|(0.829,0.994,0.699)|1
AHSQVQLVQSGAEVEKPGASVKVSCKATGYTFTNYFMQWVRQAPGQGLEWMGWVYLGNGN
TNYVQKFQGRVTMTRDVSTNTAYMELGSLRSKDMAVYYCAR
>V97RF-AQIB01153492.1-ighv |(6792, 7104)|2.96315937872|(0.999,1.000,0.968)|1
VLSQVQLQESGPGLVKPSETLSLTCAVSGGSISSSYWSWIRQSPGKGLEWIGDIYGSSGG
STSYNPSLKSRVTMSVDTSKNQFSLKLSSVTAADTAVYYCAR
>V98RF-AQIB01153498.1-ighv |(778, 1087)|2.73859816561|(0.993,0.995,0.840)|1
AHSQVQLVQSGAEVKKPGSSVKVSCKASGYTFTDYYMQWVRQAPGQGLEWMGRINPKTGG
TDYAQKFQGRVTMTRDTSTSTAYMELSSLRSEDTAVYYCAR
>V99RF-AQIB01153501.1-ighv |(4567, 4876)|2.994900005|(1.000,0.995,1.000)|1
VQCEVQLVESGGGLVQPGASLRLSCAASGFTFGDYAMSWVRQAPGKGLEWVSYISSASST
IYYADSVKGRFTISRDNAKNSLYLQMNSLKTEDTAVYYCTR
>V100RF-AQIB01153501.1-ighv |(18760, 19071)|2.83016746762|(0.951,0.910,0.979)|1
VQCEVQLVESGGGVVQPEGSLRLSCAASRFTFDDYAMSWVRQAPGKGLEWVSVISWTRRS
TYYADSVKGRFTISRDNTKNSLYLQMDRLRAEDTALYYCAKD
>V101RF-AQIB01153504.1-ighv |(6983, 7290)|2.44417859486|(0.775,0.857,0.892)|1
AHSQVQLVLSRAEVEKPGASVKVSCKASGYTFTSYFMQWVGQAPGQGREWMGWVYLGNGN
TNYEQKFQGRVTITRDVSTSTTYMELSTLRSEDMAVYYCA
>V102RF-AQIB01153506.1-ighv |(6406, 6713)|2.44417859486|(0.775,0.857,0.892)|1
AHSQVQLVLSRAEVEKPGASVKVSCKASGYTFTSYFMQWVGQAPGQGREWMGWVYLGNGN
TNYEQKFQGRVTITRDVSTSTTYMELSTLRSEDMAVYYCA
>V103RF-AQIB01153507.1-ighv |(14778, 15088)|2.58693277506|(0.979,0.984,0.776)|1
ALSQVQLQESGPGVVKPSETLSLTCAVSGYSISSGYYWGWIRQPPGKGLEWIGSIYGSGG
SNYLNPSLKSRVTLSVDTSKNQFSLKLSSVTATDTAVYYCA
>V104RF-AQIB01153507.1-ighv |(24714, 25023)|3.0|(1.000,1.000,1.000)|1
VQCEVQLVESGGGLVQPGGSLRLSCAASGFTFSSYWMHWVRQAPGKGLEWVSLINSDGGS
TRYADSVKGRFTISSENAKNSLYLQMNSLRAEDTAVYYCAR
>V105RF-AQIB01153507.1-ighv |(32453, 32768)|2.9899000027|(0.997,0.993,1.000)|1
VQCEVQLVQSGGGLVQPGGSLRLSCAASGFTFSEYAMAWVRQASGKGLEWVGRIRSKSNN
YGTAYAASVKGSFTISRDDSKNTLYLQMSSLKTEDTAVYYCTR
>V106RF-AQIB01153507.1-ighv |(42168, 42483)|2.80469116247|(0.986,1.000,0.871)|1
VQCEVQLVESGGGLVQPGGSLKLSCAASGFTFSNYYMDWVRQAPGKGLEWVGRIRNKANS
HTTEYAASVKDRFTISRDDSKNTLYLQMSGLKTEDKAVYYCAR
>V107RF-AQIB01153509.1-ighv |(6082, 6394)|2.98993600205|(0.998,0.994,0.998)|1
VQCEVQLVESGAGLVQPGGSLRLSCAASGFTFSDYYMDWVRQAPGKGLEWVSRISSGSGS
STYYPDSVKGRFTISRDNSKNTLYLQMNSLRAEDTAVYYCAR
>V108RF-AQIB01153509.1-ighv |(13578, 13893)|2.81368799163|(0.985,0.876,1.000)|1
VQCEVQLVESGGGLVQPGGSLRLSCAASGFTFSNHYMHWVRQAPGKGQEWVGFIRNKANG
GTAEYAASVKGRFTISRDDSKSITSLQMNSLKTEDTAVYYCTR
>V109RF-AQIB01153509.1-ighv |(29997, 30306)|2.99494800078|(1.000,0.997,0.998)|1
VQCEVQLVESGGGLVQPGGSLRLSCAASGFTFGDYDMSWVRQAPGKGLEWVSFISYTGKT
TYYADSVKGRFTISRDNAKNSLSLQMNSLRAEDTAVYYCTR
>V110RF-AQIB01153509.1-ighv |(39117, 39410)|1.73770091491|(0.593,0.908,0.567)|1
VQCEVQLVESGGGLVQPGGSLRLSCGASGFTFSDHYMDWVRQAPGKGLEWVSSISTGSGS
TTLYPDSVKGRFTISRDNAKNTLYLQMNSLRADVFS
>V111RF-AQIB01153509.1-ighv |(45356, 45665)|2.8000005966|(0.992,0.917,0.929)|1
AHSEVQLVQSGAEVKKPGASVNVSCKASGYTFTDYYLHWVRQAPGKGLEWMGRIDPENGE
SKYAQKFQDRLTMTADTSTDTAYMELSSLRSEDTAVYYCAT
>V112RF-AQIB01153511.1-ighv |(7980, 8295)|2.99298400013|(0.997,0.997,0.999)|1
VQCEVQLVESGRGLVQPGGSLRLSCAVSGFTFSDHYMSWVREAPGKGLEWVGFMRNKANG
GRTEYAASVKGRFTISRDDSKSIASLQMSSLKTEDTAVYYCAR
>V113RF-AQIB01153511.1-ighv |(11094, 11404)|2.98772803289|(0.998,1.000,0.990)|1
VQCEVQLVESGGGLVQPGGSLRLSCVASGFTFSDHYMDWVRQAPGKGLEWVSSISTGSGS
TTLYPDSVKGRFTISRDNAKNTLYLQMNSLRADDTAVYYCA
>V114RF-AQIB01153511.1-ighv |(40798, 41107)|2.99698000014|(0.998,1.000,0.999)|1
VQCEVQLVESGGGLAKPGGSLRLSCAASGFTFSSYGMHWVRQAPGKGLEWISAINSGGSN
TWYTDSVKGRFTISRDNSKNTLSLQMNSLRAEDTAVYYCAK
>V115RF-AQIB01153514.1-ighv |(1204, 1515)|1.65774344068|(0.879,0.738,0.520)|1
LSQVTLKESGPVLVKPTQTLTLTCTFSGFSLSTSGVGVSWTRQPPGKALEWLALIYWHDD
KNYSPSLKSRLTISKDTSNNQVVLTMTNMDPVDTATYYCARR
>V116RF-AQIB01153517.1-ighv |(601, 913)|2.91970612475|(0.994,0.964,0.968)|1
VLSQVQLQQWGGGLVKPSETLSLTCAVYGGSISGYYYWSWIRQPPGKGLEWIGNIDGNSG
STNYNPSLKSRVTISKDTSKNQFSLKLSSVTAADTAVYYCAR
>V117RF-AQIB01153522.1-ighv |(387, 699)|2.75009609532|(0.916,0.885,0.961)|1
VLSQVQLQESGPGLLKPSETLSLTCAVSGGSISGGYGWGWIRQPPGKGLEWIGSIYTSSG
NTYYNPSLKSRVTISTDTSNNQFSLKLNSVTAADTAVYYCAR
>V118RF-AQIB01153537.1-ighv |(1707, 2018)|2.95810798542|(0.999,1.000,0.964)|1
VQCEVQLVESGGGVVQPGGSLRLSCAASGFTFDDYGMHWVRQAPGKGLEWVSDISWDGDS
TYYADSVKGRFTISRDDAKNSLYLQMDSLRAEDTALYYCAKD
>V119RF-AQIB01153538.1-ighv |(4311, 4620)|2.9773601679|(0.998,0.994,0.986)|1
AQSQVQLVQSGAEVKKPGASVKLSCKASGYTFTSYNINWVRQAPGQVLEWMGWINPSNGN
TGYAQKFQGRVTMTRDTSTSTAYMELSSLISEDTAVYYCAR
>V120RF-AQIB01153538.1-ighv |(21429, 21738)|2.39530453852|(0.940,0.912,0.721)|1
AHSQVQLVQSGVEVKKPGASVKVSCKASGYTFSIYAISWVRQAPGQGLEWMGAIIPLVGI
TNYAQKFQGRVTITADTSTSTAYMELSSLRSEDTAVYYCAR
>V121RF-AQIB01153538.1-ighv |(31031, 31340)|2.41652929812|(0.942,0.763,0.859)|1
AHSQVQLVQSGAEGKKPGSSVKVSCKASGYTFTNSAVQWVRQSPEQGLEWIGVIIIGNDN
TGYAQKFQGRVTITMDVSMSTAYVELSSLRSEDMAVYYCAA
>V122RF-AQIB01153541.1-ighv |(19819, 20128)|2.54052019916|(0.896,0.770,0.946)|1
AHSQEQLVQSGAEVKKPGASVKVSCKASGYIFTGYIISWLRQAPGQGFEWMGGINPSDGS
TSYAQKFQGRVTMTRDTSTSTVYVELSSLRSEDTAVYYCAA
>V123RF-AQIB01153541.1-ighv |(23910, 24219)|2.84755919449|(0.936,0.930,0.996)|1
AHSEMQLVQSEAEVKKPGASVKVSCKVSGYTFTYPYLHWVRQTPGQGLEWMGWITPYNGN
TNYAQKFQDRVTITRDRSMSTAYMELSSLRSEDTAVYYCAR
>V124RF-AQIB01153543.1-ighv |(7057, 7368)|2.994900005|(1.000,1.000,0.995)|1
VQCEVQLVESGGGVVQPGGSLRLSCAASGFTFDDYAMGWVRQAPGKGLEWVSGISWNSGS
TGYADSVKGRFTISRDNAKNSLYLQMNRLRAEDTALYYCAKD
>V125RF-AQIB01153550.1-ighv |(2975, 3287)|2.70372399969|(0.859,0.965,0.996)|1
VLSQVQLQESGPGLVKPSETLSLTCAVSGYSISSAYDWSWIRQPPGKGLELIGYIYGNSA
STSYNPSLKSRVTISKDTSKNQFSLKLSSVTAADTAVYYCAR
>V126RF-AQIB01153553.1-ighv |(7961, 8270)|2.96886891211|(1.000,0.972,1.000)|1
VQGEVQLVESGGGLAKPGGSLRLSCSASGFTFSDYYMHWVRQASGKGLEWVSRINTGGGS
TWYADSVKGRFTISRENAKNTLYLQMDSLRAEDTAVYYCAR
>V127RF-AQIB01153553.1-ighv |(15671, 15986)|2.87365800141|(0.986,0.988,0.918)|1
VKCEAQLMESGGGLVQPGGSLRLSCAASGFTFSDHYMQWVRQAPGKGLEWVGLIRNKVDG
ETTDYAASVKGRVTISRDESKSITYLQMNNLKTEDTAVYYCAR
>V128RF-AQIB01153553.1-ighv |(22330, 22639)|2.79662300417|(0.997,0.866,1.000)|1
VQGEVQLVESGGGLVQPGGSLRLSCAASGFTFSSYAMHWARQAPGKGLEWVSYISSGGGN
TYYADSVKGRFTISRDNSKNTLSLQMNSLRAEDTAVYYCAR
>V129RF-AQIB01153555.1-ighv |(4669, 4978)|2.2241339477|(0.976,0.969,0.641)|1
VCAEVQLVQSGAEVKRPGESLRISCKTSGYSFTSSWISWVRQMPGKGLEWMGRIYPGDSD
TEYSPSFQGQVTISADKSISTTYLQWSSLKASDTATYYCAK
>V130RF-AQIB01153555.1-ighv |(23903, 24218)|2.99166002957|(0.993,0.999,1.000)|1
VQCEVQLVESGGGLVQPGGSLRLSCAASGFTFSDHYMDWVRQAPGKGLKWVGRIRNKANS
YTTEYAASVKGRFTISRDDSKNTLYLQMSSLKTEDTAVYYCTR
>V131RF-AQIB01153555.1-ighv |(39959, 40271)|2.26893956934|(0.994,0.986,0.656)|1
VQCEVQLVESGGGLVQPEGSLRLSCVASGFTFSNYDMAWVRQAPGKGLEWVSRISSPSGS
STYYPDSVKGRFTISRENAKNTLYLQMNSLRAEDTAVYYCAR
>V132RF-AQIB01153556.1-ighv |(2509, 2815)|2.32630435948|(0.833,0.683,0.988)|1
VQCEVQLVEYGGGLVQPGGSLRHSCGFTFSDHYMSWVHPAPGKGLEWVGFMRNKANGGRT
EYAASVKGRFTISRDDSKSIASLQMSSLNTEDTVLYYCAR
>V133RF-AQIB01153557.1-ighv |(2988, 3297)|2.99799200002|(1.000,0.999,0.999)|1
VQCEVQLVESGGGLVQPGGSLRLSCAASGFTFSDYWMYWVRQAPGKGLEWVSRISGSSSS
TYYPDSVKGRFTISRDNAKNTLYLQMDSLRAEDTAVYYCAR
>V134RF-AQIB01153557.1-ighv |(15135, 15441)|2.9731803079|(0.997,0.983,0.994)|1
VQCEVQLVESGGGLVQPGGTLRLSCAASGFTFGNSDLIWIRQAPGKGLEWVSYISSGGST
YYSDSVKGRFTISRENAKNTLYLQMSSLRVEDTAVYYCVR
>V135RF-AQIB01153558.1-ighv |(4802, 5117)|2.99498400013|(0.999,0.999,0.997)|1
VQCEVQLVESGGGLVQPGGSLRLSCAASGFTFSNSWMSWVRQAPGKGLEWVARIKSKADG
GTAEYAASVKGRFTISRDDSKNTLYLQMNSLKTEDTAVYYCTI
>V136RF-AQIB01153561.1-ighv |(995, 1304)|2.56764692942|(0.957,0.879,0.824)|1
VQCEVQPVESGGGLVQPGGSLRLSCTASGFTFSSTRMNWIRQSPGKRLEWVADIKYDGSE
KYYVDSVKGRFTISRDNAKNSLYLQMNSLRAEDTAVYYCVR
>V137RF-AQIB01153564.1-ighv |(5745, 6054)|2.35302647735|(0.956,0.924,0.703)|1
VSAEVQLVQSGAEVKRPGESLKISCKTSGYSFTSYWISWVRQIPGKGLEWIGTIYPSDSD
TRYSPSFQGQVTISADKSISTAYLQWSSLKASDTATYYCAK
>V138RF-AQIB01153565.1-ighv |(7316, 7625)|2.59840530194|(0.956,0.959,0.789)|1
VCAEVQLVQSGAEVKKPGESLKISCKTSGYSFTSYWISWVRQIPGKGLEWIGAIDPSDSD
TRYSPSFQGQVTISADKSISTAYLQWSSLKSSDTATYYCAK
>V139RF-AQIB01153566.1-ighv |(30566, 30881)|2.99275601537|(0.994,1.000,0.999)|1
VQCEVQLVESGGGLVQPGGTLRLSCAASGFTFSNYWMDWVRQAPGKGLEWVGFIKNKADG
GTAEYAASVKGRFTISRDDSKNTLYLQMNSLKTEDTAVYYCTR
>V140RF-AQIB01156901.1-igkv |(3348, 3648)|2.99899600001|(1.000,0.999,1.000)|1
AKCDIQMTQSPSSLSASVGDKVTITCQASQSISSWLAWYQQKPGKAPKLLIYKASSLESG
VPSRFSGSGSGTDFTLTISSLQPEDFATYYCQQHNSAP
>V141RF-AQIB01158310.1-igkv |(1186, 1501)|2.78005197352|(0.985,0.895,0.940)|1
TSGDIVMTQTPLSLPVTPGEPASISCRSSQSLLHSNGYTYLNWYLQKPGQSPLLLIYLVS
NRASGVPDRFSGSGSGTDFTLKISRVEAEDVGVYYCMQDIKLP
>V142RF-AQIB01162308.1-trbv |(21260, 21567)|2.27674383885|(0.886,0.815,0.711)|1
PEVTQTPSHQVTQMGQEVILRCVPIPNHLYFYWYRQILGQKVEFLVIFFDNNISEKSEIF
DDRFSVGRPDGSDFTLKIKSTKLEDSAMYFCASSEATALQ
>V143RF-AQIB01162311.1-trbv |(7799, 8097)|1.87038885557|(0.899,0.902,0.515)|1
TQTPSHQVTQMGQEVILRCVPIPNHLNFYWYRQILGQKVEFLVYFYNDKILEKSEIFDDR
FSVERPDGSNFTLKIKSTKLEDSATYFCASSEATALQ
>V144RF-AQIB01162311.1-trbv |(11768, 12065)|2.94919216959|(0.990,0.981,0.979)|1
SLDTAVSQTPKYLVTQMGKKVSLKCEQNLGHDTMYWYKQDSKKLLKIMFSYNNKELTINE
TVSTRFSPESPDKAHLILHIKSLELGDSAVYFCASSQ
>V145RF-AQIB01162312.1-trbv |(4219, 4516)|2.89590279134|(0.982,0.971,0.948)|1
PTDTGVTQTPKHLVMGMTNKKSLKCEQHLGHNAMYWYKQKAKKPPELMFVYQYEKLSINE
SVPSRFSPECSKSSLLYLHLQALQPEDSALYLCASSQ
>V146RF-AQIB01162312.1-trbv |(12154, 12454)|2.17843068292|(0.835,0.689,0.759)|1
HTEPEVTQTPSHQVTQMGQEVILWCVPISNHFYFYWYRQILGQKVEFLVYFYNGEISEKS
EIFDDRFSVGRSDGVHFTLKIKSTKLEDSATYFCASSE
>V147RF-AQIB01162312.1-trbv |(18644, 18941)|2.40816485805|(0.968,0.931,0.725)|1
PLDTAVFQTPKYLVTQMGKKVSLKCEQNLGHDTMYWYKQDSKKLLKIMFIYSNEEPILNE
TVPNRFSPESLGKAHLNLHIKPVELGDSAVYFCASSQ
>V148RF-AQIB01162312.1-trbv |(22989, 23286)|2.94682735083|(0.996,0.971,0.983)|1
PTDTGVTQTPKHLVMGMTNKKSLKCEQHLGHNAMYWYKQKAKKPPELMFVYNYEKLSINE
SVPSRFSPECSKSSLLYLHLRALQPEDSALYLCASSQ
>V149RF-AQIB01162312.1-trbv |(33931, 34221)|2.53589902108|(0.905,0.790,0.893)|1
EAGVTQTPRSLIKMRGQQVTLSCSPISGHRSVSWYQQTPGQGLQLLFEYFSETQRQKGNF
PNRFSGRQFSNSHSEMNVSTLELGDSALYLCASSL
>V150RF-AQIB01162312.1-trbv |(41443, 41740)|2.98230822856|(0.998,0.985,1.000)|1
PANADVTQSPKFQILKTGQNMTLKCAQDMNHNSMYWYRQDPGMGLRLIHYSATEDTTDTG
EVPDGYSVSRLNKKEFLLRLESAAPSQTSVYFCASSE
>V151RF-AQIB01162312.1-trbv |(55583, 55896)|2.95842016586|(0.990,0.991,0.978)|1
SLDTAVSQTPKYLVTQTGKNESLKCEQNLGHNAMYWYKQDSKKLLKIMFIYSNKEPVLNE
TVPNRFSPKSPDKAHLNLYITSVELGDSAVYFCASSQDTALQ
>V152RF-AQIB01162312.1-trbv |(59013, 59310)|2.88900028092|(0.956,0.965,0.969)|1
PMETGVTQTPRHLVMGMTNKKSLKCEQHLGHNAMYWYKQKAKKPPELMFIYNFKERAENN
SVPSRFSPECPDSSLLYLHLRALQPEDSALYLCASSQ
>V153RF-AQIB01162312.1-trbv |(70730, 71027)|2.94541305243|(0.974,0.993,0.980)|1
PVNAGVTQTPKFQILKTGQNMTLKCAQDMNHDRMYWYRQDTGMGLRLIHYSVGEGNTEKG
EVPSGYNASRLNKKDFLLRLELAAPSQTSIYFCASSE
>V154RF-AQIB01162312.1-trbv |(74325, 74625)|2.61353971076|(0.892,0.859,0.869)|1
HTDAGVSQSPRNKVTEEGKDVVLRCDPISGHIALYWYRQSLGKGLEFLIFFQGNDAPDKS
GLPSGRFSAERLEGSVSTLKIQRTQQGDSAVYLCASSS
>V155RF-AQIB01162313.1-trbv |(10114, 10411)|2.9425766041|(0.990,0.974,0.980)|1
HTGAGVSQSPSNKVTEKGNVALRCDPISGHAVLYWYRQNLGQGLEFLIYFQGTSAVDDSG
LRSDRFSATRPEGSVSTLKIQRTEQGDSATYFCASSL
>V156RF-AQIB01162313.1-trbv |(15121, 15427)|2.28408412808|(0.858,0.731,0.781)|1
DTGVTQSPTHLIKTRGQQVTLRCSPISGHTSVSWYQQAPGQGPQFIFKYANELRTSEGNF
PHRFSGRQFRDYHSEMNVSALELGDSALYLCASSLAQPGR
[truncated: 59,465 more chars]
