# Supplementary material for: Iterative Variable Gene Discovery from Whole Genome Sequencing with a Bootstrapped Multiresolution Algorithm
Source: Comput Math Methods Med. 2019 Feb 11;2019:3780245. doi: 10.1155/2019/3780245 (PMC6388353; doi:10.1155/2019/3780245)
Supplement: Supplementary Materials — supp_materialsV2.pdf: this is an updated document, which includes new figures requested by the reviewer. sequences_alignments.zip: these are genome sequence files that are relevant for reproducing some of the results. [file 3780245.f1.zip › 3780245.f1/sequences_alignments/bstrp_iteration_1_r.dnd]

(
(
(
(
(
(
(
V119RF-AGCE01148199.1-ighv:0.0527103
,
(
(
V183RF-AHZZ01084890.1-ighv:0.0150156
,
V135RF-AQIB01153558.1-ighv:0.0150156
):0.0309614
,
(
V85RF-JABR01035059.1-ighv:0.0467691
,
(
V3RF-ABGA01025791.1-ighv:0.0393192
,
(
V132RF-JYKQ01245881.1-ighv:0.0297557
,
(
V146RF-ADFV01143437.1-ighv:0.0358505
,
(
(
V237RF-AQIA01066366.1-ighv:0.0175892
,
(
V236RF-AQIA01066362.1-ighv:0.00488761
,
(
V17RF-AHZZ01069449.1-ighv:-0
,
V14RF-JYKQ01005774.1-ighv:-0
):0.00488761
):0.0127016
):0.00506992
,
(
V122RF-ADFV01131961.1-ighv:0.0199615
,
V139RF-AQIB01153566.1-ighv:0.0199615
):0.0026976
):0.0131914
):-0.00609484
):0.00956348
):0.00744987
):-0.000792056
):0.00673329
):0.0543269
,
(
(
V105RF-AQIB01153507.1-ighv:0.056594
,
(
V85RF-AQIB01153481.1-ighv:0.0593663
,
(
(
V39RF-JYKQ01041713.1-ighv:0.0304258
,
(
V55RF-JABR01091180.1-ighv:0.0174141
,
(
V163RF-AQIA01075825.1-ighv:0.0148668
,
V82RF-JABR01004698.1-ighv:0.0148668
):0.00254736
):0.0130117
):0.00936068
,
(
V6RF-ABGA01025808.1-ighv:0.027749
,
(
V4RF-AJFE01011110.1-ighv:0.0148668
,
V92RF-AACZ03097899.1-ighv:0.0148668
):0.0128822
):0.0120375
):0.0195798
):-0.00277232
):0.0503834
,
(
(
V45RF-AHZZ01100290.1-ighv:0.00994053
,
(
V227RF-AQIB01145361.1-ighv:-0
,
V228RF-AQIB01145362.1-ighv:-0
):0.00994053
):0.0873159
,
(
V106RF-AQIB01153507.1-ighv:0.0543151
,
(
(
V187RF-AQIA01075865.1-ighv:0.0365737
,
(
V156RF-AQIA01075814.1-ighv:0.0307188
,
(
V130RF-AQIB01153555.1-ighv:0.027749
,
(
V93RF-AACZ03097900.1-ighv:0.0148668
,
V144RF-CABD02117494.1-ighv:0.0148668
):0.0128822
):0.00296981
):0.0058549
):0.00955636
,
(
V56RF-JABR01091180.1-ighv:0.0400371
,
(
V15RF-JYKQ01005777.1-ighv:0.0150516
,
(
V232RF-AQIA01066360.1-ighv:0.00994053
,
V18RF-AHZZ01069451.1-ighv:0.00994053
):0.00511111
):0.0249854
):0.00609295
):0.0081851
):0.0429413
):0.00972094
):5.97835e-05
):0.0243236
,
(
(
V3RF-JYKQ01005758.1-ighv:0.0438175
,
(
V55RF-AHZZ01104761.1-ighv:0.0148668
,
V127RF-AQIB01153553.1-ighv:0.0148668
):0.0289507
):0.0982452
,
(
V17RF-ABDC01314388.1-ighv:0.1138
,
(
(
V44RF-ABDC01375549.1-ighv:0.0493321
,
(
V7RF-ABDC01231274.1-ighv:0.0199615
,
(
V67RF-ABDC01407894.1-ighv:0.0148668
,
V69RF-ABDC01417489.1-ighv:0.0148668
):0.00509472
):0.0293706
):0.0335311
,
(
(
V112RF-AQIB01153511.1-ighv:0.0148668
,
V136RF-JYKQ01245888.1-ighv:0.0148668
):0.0641084
,
(
(
V94RF-AACZ03097900.1-ighv:0.0303695
,
V143RF-CABD02117492.1-ighv:0.0303695
):0.0406229
,
(
V18RF-JYKQ01005787.1-ighv:0.0716142
,
(
V9RF-ABGA01025808.1-ighv:0.0630209
,
(
(
(
V48RF-AJFE01045051.1-ighv:-0
,
V103RF-AACZ03097906.1-ighv:-0
):0.027749
,
(
V24RF-ABGA01044313.1-ighv:0.0199615
,
V136RF-CABD02117473.1-ighv:0.0199615
):0.00778747
):0.0330347
,
(
(
V53RF-ABGA01099941.1-ighv:0.027749
,
(
V158RF-AACZ03171037.1-ighv:0.0199615
,
V121RF-CABD02117421.1-ighv:0.0199615
):0.00778747
):0.0224476
,
(
(
V31RF-ABGA01058273.1-ighv:0.00488761
,
V71RF-ABGA01174999.1-ighv:0.00488761
):0.049289
,
(
V202RF-JYKQ01062881.1-ighv:0.0484603
,
(
V99RF-JABR01063291.1-ighv:0.0591408
,
(
V9RF-JABR01059011.1-ighv:0.0478932
,
(
V204RF-AHZZ01090492.1-ighv:0.0625384
,
(
V58RF-ABGA01099948.1-ighv:0.0473204
,
(
(
V255RF-AHZZ01125719.1-ighv:0.0251285
,
V108RF-AQIB01153509.1-ighv:0.0251285
):0.0223899
,
(
(
V251RF-AQIA01066395.1-ighv:0.0199615
,
V86RF-AQIB01153482.1-ighv:0.0199615
):0.0157829
,
(
V116RF-ADFV01131954.1-ighv:0.027749
,
(
V242RF-AQIA01066385.1-ighv:0.0199615
,
V92RF-AQIB01153486.1-ighv:0.0199615
):0.00778747
):0.00799544
):0.011774
):-0.000197995
):0.015218
):-0.0146453
):0.0112476
):-0.0106805
):0.00571629
):-0.00398
):0.010587
):0.00223731
):0.00859324
):-0.000621818
):0.00798286
):0.00388797
):0.0309368
):0.0282627
):-0.0107019
):0.0327476
,
(
(
(
V108RF-AACZ03097912.1-ighv:0.0101422
,
V130RF-CABD02117457.1-ighv:0.0101422
):0.0825543
,
(
V139RF-JABR01077917.1-ighv:0.0753785
,
(
V118RF-ABDC01345813.1-ighv:0.067915
,
(
V29RF-ABGA01058270.1-ighv:0.0151675
,
V68RF-ABGA01174988.1-ighv:0.0151675
):0.0527476
):0.00746342
):0.017318
):0.0436995
,
(
(
V12RF-ABDC01282065.1-ighv:0.0957812
,
(
V86RF-JABR01035059.1-ighv:0.0648466
,
V118RF-AGCE01148188.1-ighv:0.0648466
):0.0309345
):0.0347512
,
(
(
V100RF-AQIB01153501.1-ighv:0.058362
,
V127RF-JYKQ01245874.1-ighv:0.058362
):0.0811579
,
(
V10RF-ABGA01025808.1-ighv:0.114711
,
(
V247RF-AQIA01066387.1-ighv:0.101543
,
(
(
(
V1RF-AJFE01003265.1-ighv:-0
,
V117RF-AACZ03106490.1-ighv:-0
):0.0475384
,
V54RF-JABR01091180.1-ighv:0.0475384
):0.0483168
,
(
(
V12RF-AHZZ01064615.1-ighv:0.0690689
,
(
V12RF-ABGA01025810.1-ighv:0.0708606
,
(
V157RF-AACZ03171037.1-ighv:0.0681235
,
(
V8RF-ABGA01025808.1-ighv:0.0504653
,
(
V5RF-ABGA01025797.1-ighv:0.0364292
,
V57RF-ABGA01099947.1-ighv:0.0364292
):0.0140361
):0.0176582
):0.00273706
):-0.00179173
):0.0317218
,
(
V46RF-JYKQ01041718.1-ighv:0.084644
,
(
(
V169RF-AQIA01075832.1-ighv:0.0151675
,
V139RF-JYKQ01245890.1-ighv:0.0151675
):0.0665284
,
(
V179RF-AHZZ01069458.1-ighv:0.0475384
,
V109RF-AQIB01153509.1-ighv:0.0475384
):0.0341574
):0.00294818
):0.0161467
):-0.00493552
):0.00568756
):0.0131681
):0.024809
):-0.0089875
):0.00586362
):0.0277124
):0.747532
,
(
(
(
(
(
V166RF-AJFE01119883.1-ighv:0.0199615
,
V147RF-CABD02117545.1-ighv:0.0199615
):0.0308007
,
(
V7RF-ABGA01025808.1-ighv:0.0251285
,
V188RF-AHZZ01084893.1-ighv:0.0251285
):0.0256337
):0.0385674
,
(
(
V73RF-ABGA01194059.1-ighv:0.0251285
,
V87RF-JABR01035060.1-ighv:0.0251285
):0.0605614
,
(
(
V80RF-AHZZ01150255.1-ighv:0.0356862
,
V216RF-AHZZ01096572.1-ighv:0.0356862
):0.0464735
,
(
V17RF-JABR01070187.1-ighv:0.0690812
,
(
V95RF-JABR01049702.1-ighv:0.066628
,
(
V109RF-ADFV01131944.1-ighv:0.0609208
,
(
V189RF-AQIA01075867.1-ighv:0.0628965
,
(
V173RF-JYKQ01042861.1-ighv:0.0370542
,
(
V253RF-AQIA01066397.1-ighv:0.0440591
,
(
V164RF-AQIA01075826.1-ighv:0.0303695
,
V41RF-JYKQ01041713.1-ighv:0.0303695
):0.0136896
):-0.00700492
):0.0258423
):-0.00197566
):0.00570723
):0.00245311
):0.0130785
):0.00353025
):0.00363971
):0.0645897
,
(
(
(
V151RF-CABD02136430.1-ighv:0.01795
,
(
V176RF-AACZ03182257.1-ighv:0.00503527
,
V204RF-AACZ03172648.1-ighv:0.00503527
):0.0129148
):0.0559194
,
(
V56RF-ABGA01099946.1-ighv:0.0894421
,
(
V121RF-AGCE01148386.1-ighv:0.0745738
,
(
V122RF-AJFE01045453.1-ighv:0.0583555
,
(
V200RF-JYKQ01062878.1-ighv:0.0558623
,
(
V120RF-ABGA01384193.1-ighv:0.0433722
,
(
V106RF-ADFV01131940.1-ighv:0.0378688
,
(
V120RF-CABD02117420.1-ighv:0.0283206
,
(
V43RF-AJFE01045041.1-ighv:0.0203681
,
V159RF-AACZ03171037.1-ighv:0.0203681
):0.0079525
):0.00954816
):0.00550347
):0.01249
):0.00249321
):0.0162183
):0.0148683
):-0.0155726
):0.0354744
,
(
(
V56RF-AHZZ01104763.1-ighv:0.0532197
,
V68RF-AGCE01147944.1-ighv:0.0532197
):0.0619408
,
(
V111RF-AACZ03098145.1-ighv:0.110494
,
(
(
V162RF-AACZ03171037.1-ighv:0.0475384
,
V135RF-CABD02117471.1-ighv:0.0475384
):0.0616264
,
(
(
V78RF-JABR01004697.1-ighv:0.0475384
,
V99RF-AQIB01153501.1-ighv:0.0475384
):0.0654446
,
(
V134RF-AQIB01153557.1-ighv:0.116393
,
(
(
V175RF-AACZ03179884.1-ighv:0.00503527
,
V205RF-AACZ03172650.1-ighv:0.00503527
):0.0771668
,
(
(
V60RF-ABGA01099956.1-ighv:0.0364292
,
V20RF-AHZZ01069455.1-ighv:0.0364292
):0.0552772
,
(
V120RF-ABDC01345817.1-ighv:0.104769
,
(
(
(
V91RF-JZKE01278268.1-ighv:0.0256441
,
V100RF-JZKE01278607.1-ighv:0.0256441
):0.0164021
,
(
V84RF-JZKE01255181.1-ighv:0.0337132
,
(
V12RF-JZKE01244710.1-ighv:0.0309971
,
V99RF-JZKE01278605.1-ighv:0.0309971
):0.00271605
):0.00833294
):0.052638
,
(
V10RF-JABR01059011.1-ighv:0.0864764
,
(
(
V157RF-AQIA01075814.1-ighv:0.0364292
,
V243RF-AQIA01066387.1-ighv:0.0364292
):0.0648741
,
(
V52RF-ABGA01099941.1-ighv:0.0738357
,
(
(
V255RF-AQIA01073275.1-ighv:0.00498507
,
V135RF-JYKQ01245886.1-ighv:0.00498507
):0.0632242
,
(
V112RF-ADFV01131950.1-ighv:0.0563555
,
(
(
V107RF-AQIB01153509.1-ighv:0.0253837
,
V131RF-JYKQ01245880.1-ighv:0.0253837
):0.038444
,
(
(
V114RF-ADFV01131951.1-ighv:0.0151675
,
V125RF-ADFV01131961.1-ighv:0.0151675
):0.0348101
,
(
V128RF-AQIB01153553.1-ighv:0.0485268
,
(
V42RF-AJFE01045037.1-ighv:0.0437379
,
(
V57RF-ADFV01136793.1-ighv:0.0313612
,
(
V180RF-AHZZ01069458.1-ighv:0.0205777
,
V43RF-JYKQ01041713.1-ighv:0.0205777
):0.0107835
):0.0123767
):0.00478883
):0.00145077
):0.0138501
):-0.00747221
):0.0118538
):0.0056265
):0.0274676
):-0.0148269
):0.00820772
):0.0100845
):-0.0130622
):-0.00950439
):0.0341908
):-0.00340988
):-0.00381821
):0.00132902
):0.00466668
):-0.00581666
):0.0445755
):0.498645
,
(
(
(
(
V96RF-JZKE01278277.1-ighv:0.0475384
,
V103RF-JZKE01278610.1-ighv:0.0475384
):0.0483875
,
(
V9RF-JZKE01244686.1-ighv:0.0843882
,
(
(
V94RF-JZKE01278273.1-ighv:0.0256441
,
V98RF-JZKE01278602.1-ighv:0.0256441
):0.0556019
,
(
V31RF-JZKE01255160.1-ighv:0.0802644
,
(
(
V95RF-JZKE01278276.1-ighv:0.0419423
,
V105RF-JZKE01278611.1-ighv:0.0419423
):0.0244458
,
(
(
V86RF-JZKE01278248.1-ighv:0.0368125
,
V101RF-JZKE01278609.1-ighv:0.0368125
):0.0231513
,
(
V106RF-JZKE01278614.1-ighv:0.0748252
,
(
V13RF-JZKE01244715.1-ighv:0.0638242
,
(
V85RF-JZKE01255182.1-ighv:0.0571232
,
(
V102RF-JZKE01278610.1-ighv:0.0608706
,
(
V97RF-JZKE01278602.1-ighv:0.0589179
,
(
(
V78RF-JZKE01235368.1-ighv:0.0151675
,
V89RF-JZKE01278255.1-ighv:0.0151675
):0.0498551
,
(
V138RF-CABD02117477.1-ighv:0.0700144
,
(
V114RF-AQIB01153511.1-ighv:0.0562037
,
(
V92RF-JZKE01278271.1-ighv:0.0403069
,
(
V138RF-JYKQ01245889.1-ighv:0.0338649
,
(
V168RF-AQIA01075832.1-ighv:0.023139
,
(
V244RF-AQIA01066387.1-ighv:0.0153224
,
V215RF-AHZZ01096568.1-ighv:0.0153224
):0.0078166
):0.0107259
):0.006442
):0.0158969
):0.0138106
):-0.00499184
):-0.00610459
):0.0019527
):-0.00374741
):0.006701
):0.011001
):-0.0148615
):0.00642431
):0.0138763
):0.000981525
):0.00314225
):0.0115378
):0.0215823
,
(
(
V119RF-AJFE01045439.1-ighv:0.0532197
,
V93RF-JZKE01278271.1-ighv:0.0532197
):0.0428309
,
(
V126RF-CABD02117442.1-ighv:0.13971
,
(
V8RF-ABDC01231277.1-ighv:0.0942774
,
(
V87RF-AQIB01153482.1-ighv:0.0826695
,
(
(
V161RF-ABGA01203420.1-ighv:0.0602937
,
(
(
V6RF-AJFE01011113.1-ighv:-0
,
V98RF-AACZ03097900.1-ighv:-0
):0.0299681
,
(
V142RF-CABD02117487.1-ighv:0.0127323
,
(
(
V46RF-AJFE01045051.1-ighv:-0
,
V101RF-AACZ03097906.1-ighv:-0
):0.00503527
,
V97RF-AACZ03097900.1-ighv:0.00503527
):0.00769702
):0.0172358
):0.0303256
):0.0130926
,
(
V42RF-ABDC01373301.1-ighv:0.0607512
,
(
V118RF-CABD02117416.1-ighv:0.0511111
,
(
V27RF-ABGA01044319.1-ighv:0.0576128
,
(
V76RF-ABDC01423814.1-ighv:0.0447404
,
(
V44RF-AJFE01045048.1-ighv:0.00498507
,
V160RF-AACZ03171037.1-ighv:0.00498507
):0.0397553
):0.0128725
):-0.00650176
):0.00964009
):0.0126351
):0.00928325
):0.0116079
):0.0454325
):-0.0436593
):0.0214576
):0.416253
,
(
V58RF-AGCE01147750.1-ighv:0.158259
,
(
(
V54RF-ABGA01099945.1-ighv:0.129918
,
(
(
V11RF-JZKE01244709.1-ighv:0.0447404
,
(
V88RF-JZKE01278253.1-ighv:0.0364292
,
V104RF-JZKE01278611.1-ighv:0.0364292
):0.00831115
):0.0614646
,
(
(
V90RF-JZKE01278267.1-ighv:0.0820141
,
(
V234RF-AQIA01066360.1-ighv:0.047581
,
(
V17RF-JYKQ01005784.1-ighv:0.0230061
,
(
V24RF-AHZZ01069456.1-ighv:0.00498507
,
V21RF-JYKQ01005789.1-ighv:0.00498507
):0.018021
):0.0245749
):0.0344331
):0.0218291
,
(
(
V6RF-ABDC01231272.1-ighv:0.00484029
,
V41RF-ABDC01373300.1-ighv:0.00484029
):0.109369
,
(
(
V135RF-ABDC01471087.1-ighv:0.0771734
,
(
(
V14RF-JABR01066987.1-ighv:0.0205777
,
V198RF-JYKQ01056010.1-ighv:0.0205777
):0.035318
,
(
V66RF-AGCE01147874.1-ighv:0.0581356
,
(
V60RF-AGCE01147864.1-ighv:0.0471887
,
(
(
V43RF-ABDC01375549.1-ighv:-0
,
V87RF-ABDC01454767.1-ighv:-0
):0.0547056
,
(
V104RF-AQIB01153507.1-ighv:0.0378075
,
(
(
V162RF-AQIA01075825.1-ighv:0.0256441
,
V130RF-JYKQ01245876.1-ighv:0.0256441
):0.00806913
,
(
(
V3RF-AJFE01011110.1-ighv:-0
,
V91RF-AACZ03097899.1-ighv:-0
):0.00498507
,
V145RF-CABD02117499.1-ighv:0.00498507
):0.0287281
):0.00409432
):0.016898
):-0.00751686
):0.0109469
):-0.00223991
):0.0212778
):0.0110753
,
(
V9RF-ABDC01282056.1-ighv:0.0884638
,
(
V127RF-ABDC01396906.1-ighv:0.079495
,
(
V74RF-ABDC01421861.1-ighv:0.0697763
,
(
(
V4RF-ABDC01231268.1-ighv:0.00503527
,
V138RF-ABDC01493416.1-ighv:0.00503527
):0.0431198
,
(
V10RF-ABDC01282057.1-ighv:0.0309971
,
V45RF-ABDC01377237.1-ighv:0.0309971
):0.0171579
):0.0216212
):0.00971876
):0.0089688
):-0.000215091
):0.0259606
):-0.0103661
):0.00236174
):0.0237126
):-0.00994657
,
(
(
(
V80RF-ABGA01243345.1-ighv:0.047581
,
(
V114RF-AACZ03098176.1-ighv:0.0364292
,
V127RF-CABD02117444.1-ighv:0.0364292
):0.0111518
):0.0417686
,
(
(
(
V165RF-AQIA01075827.1-ighv:0.00503527
,
V256RF-AHZZ01125719.1-ighv:0.00503527
):0.0574207
,
(
V117RF-ADFV01131956.1-ighv:0.0364292
,
V202RF-AHZZ01090491.1-ighv:0.0364292
):0.0260267
):0.020945
,
(
V10RF-JZKE01244690.1-ighv:0.0733207
,
(
V121RF-AJFE01045447.1-ighv:0.0663949
,
(
(
V81RF-JYKQ01086555.1-ighv:0.0203681
,
V141RF-JYKQ01245904.1-ighv:0.0203681
):0.022368
,
(
V118RF-AQIB01153537.1-ighv:0.0423931
,
(
V107RF-AACZ03097910.1-ighv:0.037437
,
(
V115RF-CABD02117395.1-ighv:0.0334453
,
(
V222RF-AHZZ01103094.1-ighv:0.0150156
,
V124RF-AQIB01153543.1-ighv:0.0150156
):0.0184297
):0.00399167
):0.00495608
):0.000343017
):0.0236588
):0.00692576
):0.0100802
):0.00594872
):0.00599395
,
(
(
(
V187RF-AHZZ01084892.1-ighv:0.0337334
,
(
V133RF-AQIB01153557.1-ighv:0.0310367
,
(
V190RF-AQIA01075868.1-ighv:0.0203681
,
V6RF-JYKQ01005770.1-ighv:0.0203681
):0.0106685
):0.00269679
):0.0238848
,
(
V231RF-AQIB01158235.1-ighv:0.0447404
,
(
V217RF-AHZZ01096574.1-ighv:0.0151675
,
V113RF-AQIB01153511.1-ighv:0.0151675
):0.0295729
):0.0128779
):0.0258097
,
(
(
(
V55RF-ABGA01099946.1-ighv:0.0423869
,
V117RF-CABD02117398.1-ighv:0.0423869
):0.0165517
,
(
(
V35RF-CABD02136430.1-ighv:-0
,
V150RF-CABD02136430.1-ighv:-0
):0.0583064
,
(
V18RF-JABR01070187.1-ighv:0.0232438
,
(
V159RF-AQIA01075820.1-ighv:0.0153224
,
V128RF-JYKQ01245874.1-ighv:0.0153224
):0.00792139
):0.0350626
):0.000632279
):0.0225412
,
(
(
V41RF-AJFE01045037.1-ighv:0.0723285
,
(
(
V161RF-AQIA01075823.1-ighv:0.0511534
,
(
V126RF-AQIB01153553.1-ighv:0.0378278
,
(
V26RF-AHZZ01091599.1-ighv:0.0337132
,
(
V181RF-AQIA01075862.1-ighv:0.0256441
,
V246RF-AQIA01066387.1-ighv:0.0256441
):0.00806913
):0.00411457
):0.0133256
):-0.00230788
,
(
V45RF-JYKQ01041718.1-ighv:0.0364292
,
V254RF-JYKQ01237599.1-ighv:0.0364292
):0.0124163
):0.023483
):8.75816e-05
,
(
(
V119RF-CABD02117419.1-ighv:0.0447404
,
(
V223RF-AHZZ01103097.1-ighv:0.0364292
,
V136RF-JABR01077916.1-ighv:0.0364292
):0.00831115
):0.0173367
,
(
V83RF-JABR01011024.1-ighv:0.0475384
,
V71RF-AGCE01148057.1-ighv:0.0475384
):0.0145387
):0.0103389
):0.00906375
):0.00194816
):0.0119156
):0.0246275
):0.0382883
):0.416253
):0.0823915
):0.248887
):0.983275
,
(
(
V207RF-JABR01190886.1-ighv:0.292902
,
(
(
(
V38RF-JYKQ01041707.1-ighv:0.0434665
,
(
V0RF-ABGA01025787.1-ighv:0.0230061
,
(
V90RF-AACZ03097899.1-ighv:0.00498507
,
V146RF-CABD02117506.1-ighv:0.00498507
):0.018021
):0.0204604
):0.0230045
,
(
(
V104RF-ADFV01131938.1-ighv:-0
,
V105RF-ADFV01131939.1-ighv:-0
):0.0419839
,
(
V165RF-AACZ03171037.1-ighv:0.0203681
,
V123RF-CABD02117431.1-ighv:0.0203681
):0.0216157
):0.0244871
):0.166436
,
(
(
(
V40RF-AJFE01045037.1-ighv:0.0419423
,
V51RF-ABGA01099940.1-ighv:0.0419423
):0.0493894
,
(
(
V110RF-ADFV01131946.1-ighv:0.0309971
,
V121RF-ADFV01131959.1-ighv:0.0309971
):0.0416339
,
(
V111RF-AQIB01153509.1-ighv:0.0621901
,
(
V254RF-AQIA01073275.1-ighv:0.0419423
,
V218RF-AHZZ01096575.1-ighv:0.0419423
):0.0202478
):0.0104409
):0.0187007
):0.0586037
,
(
(
(
V51RF-JABR01089346.1-ighv:0.0256441
,
V103RF-JABR01068488.1-ighv:0.0256441
):0.0305485
,
(
V140RF-JABR01078980.1-ighv:0.0364292
,
V141RF-JABR01086102.1-ighv:0.0364292
):0.0197633
):0.0644256
,
(
(
(
V123RF-AQIB01153541.1-ighv:0.0151675
,
V162RF-JYKQ01015026.1-ighv:0.0151675
):0.0323923
,
(
(
V51RF-AJFE01045051.1-ighv:-0
,
V106RF-AACZ03097906.1-ighv:-0
):0.0256441
,
V134RF-CABD02117467.1-ighv:0.0256441
):0.0219157
):0.0735354
,
(
(
(
V15RF-ABGA01044302.1-ighv:-0
,
V105RF-ABGA01313763.1-ighv:-0
):0.0317299
,
(
V120RF-ADFV01131958.1-ighv:0.021461
,
V141RF-CABD02117482.1-ighv:0.021461
):0.0102689
):0.0788656
,
(
(
V234RF-ABGA01360476.1-ighv:0.0909049
,
(
V188RF-AACZ03098097.1-ighv:0.0704985
,
(
(
V148RF-CABD02117766.1-ighv:0.0203681
,
V149RF-CABD02117767.1-ighv:0.0203681
):0.0376565
,
(
V103RF-ADFV01131933.1-ighv:0.047581
,
(
(
V50RF-AJFE01045051.1-ighv:-0
,
V105RF-AACZ03097906.1-ighv:-0
):0.0364292
,
(
V34RF-CABD02136332.1-ighv:-0
,
V133RF-CABD02117467.1-ighv:-0
):0.0364292
):0.0111518
):0.0104436
):0.0124739
):0.0204064
):0.0116089
,
(
(
V235RF-ABGA01360478.1-ighv:0.0419423
,
(
V191RF-AACZ03098100.1-ighv:0.00498507
,
V113RF-CABD02117385.1-ighv:0.00498507
):0.0369573
):0.0597931
,
(
V57RF-AGCE01147749.1-ighv:0.0918417
,
(
(
(
V120RF-AJFE01045444.1-ighv:-0
,
V161RF-AACZ03171037.1-ighv:-0
):0.0546837
,
(
V78RF-JYKQ01067101.1-ighv:0.0337132
,
(
V96RF-JABR01055994.1-ighv:0.0256441
,
V119RF-AQIB01153538.1-ighv:0.0256441
):0.00806913
):0.0209705
):0.0201011
,
(
V113RF-AGCE01147919.1-ighv:0.0848384
,
(
V72RF-AGCE01148067.1-ighv:0.0503791
,
(
V126RF-JYKQ01245859.1-ighv:0.0256441
,
V201RF-JYKQ01062881.1-ighv:0.0256441
):0.024735
):0.0344593
):-0.0100536
):0.0170569
):0.0098937
):0.00077837
):0.00808174
):0.0104996
):-0.000477053
):0.0293173
):0.0829714
):0.0599953
):1.6346
,
(
(
V14RF-AHZZ01064625.1-ighv:0.0660981
,
(
V181RF-AHZZ01069461.1-ighv:0.0416695
,
(
V140RF-CABD02117482.1-ighv:0.0384085
,
(
V18RF-ABGA01044306.1-ighv:0.0252434
,
(
V62RF-ABGA01104801.1-ighv:0.0192639
,
(
V17RF-ABGA01044305.1-ighv:0.01795
,
(
(
V113RF-ADFV01131950.1-ighv:0.0101422
,
V103RF-ABGA01313761.1-ighv:0.0101422
):0.00518022
,
V14RF-ABGA01044302.1-ighv:0.0153224
):0.00262765
):0.00131382
):0.00597948
):0.0131651
):0.00326102
):0.0244286
):0.0100008
,
(
(
(
V166RF-AACZ03171037.1-ighv:-0
,
V190RF-AACZ03098100.1-ighv:-0
):0.0665993
,
(
V29RF-AHZZ01091603.1-ighv:0.0576011
,
(
V39RF-AHZZ01098942.1-ighv:0.0405641
,
(
V171RF-AQIA01075834.1-ighv:0.0351315
,
(
V249RF-AQIA01066387.1-ighv:0.0283987
,
(
V180RF-AQIA01075860.1-ighv:0.0201628
,
V183RF-AQIA01075862.1-ighv:0.0201628
):0.00823592
):0.00673279
):0.00543259
):0.017037
):0.00899827
):0.0163813
,
(
V114RF-AGCE01147923.1-ighv:0.103048
,
(
V246RF-AHZZ01108758.1-ighv:0.084214
,
(
(
V205RF-AHZZ01090494.1-ighv:0.0283206
,
(
V214RF-AHZZ01096568.1-ighv:0.0100403
,
V225RF-AHZZ01103258.1-ighv:0.0100403
):0.0182803
):0.0714027
,
(
V30RF-ABGA01058270.1-ighv:0.0717789
,
(
V28RF-ABGA01058270.1-ighv:0.0803064
,
(
V160RF-JYKQ01015003.1-ighv:0.0682584
,
(
V138RF-JABR01077917.1-ighv:0.0511503
,
(
V116RF-AQIB01153517.1-ighv:0.0633981
,
(
(
V173RF-AQIA01075844.1-ighv:0.0203681
,
V20RF-JABR01074704.1-ighv:0.0203681
):0.0335756
,
(
V97RF-AQIB01153492.1-ighv:0.0417438
,
(
V254RF-AHZZ01112481.1-ighv:0.0552883
,
(
V84RF-AQIB01153480.1-ighv:0.059696
,
(
V176RF-AQIA01075855.1-ighv:0.0649774
,
(
V61RF-ABGA01104800.1-ighv:0.0463003
,
(
(
V45RF-AJFE01045051.1-ighv:0.00503527
,
V99RF-AACZ03097904.1-ighv:0.00503527
):0.0501832
,
(
(
V178RF-AQIA01075857.1-ighv:0.00984269
,
V79RF-JYKQ01067101.1-ighv:0.00984269
):0.0335438
,
(
(
V179RF-AQIA01075859.1-ighv:0.0203681
,
V77RF-AHZZ01129142.1-ighv:0.0203681
):0.0213086
,
(
V230RF-AQIB01153518.1-ighv:0.054387
,
(
V137RF-JABR01077916.1-ighv:0.0422282
,
(
(
V109RF-AACZ03097916.1-ighv:0.0126039
,
(
V13RF-ABGA01037228.1-ighv:0.00498507
,
V16RF-ABGA01044304.1-ighv:0.00498507
):0.00761883
):0.0256108
,
(
V20RF-ABGA01044307.1-ighv:0.0433871
,
(
V137RF-JYKQ01245888.1-ighv:0.0448974
,
(
V88RF-JABR01035060.1-ighv:0.0354405
,
(
V172RF-AQIA01075834.1-ighv:0.0330636
,
(
V40RF-AHZZ01098950.1-ighv:0.0228714
,
(
V177RF-AQIA01075856.1-ighv:0.02558
,
(
V154RF-AQIA01075814.1-ighv:0.0151675
,
V167RF-AQIA01075832.1-ighv:0.0151675
):0.0104125
):-0.0027086
):0.0101922
):0.00237691
):0.00945693
):-0.00151033
):-0.00517242
):0.00401352
):0.0121588
):-0.0127102
):0.00170973
):0.011832
):-0.0089182
):0.018677
):-0.0052814
):-0.0044076
):-0.0135446
):0.0122
):0.00945433
):-0.0122478
):0.0171081
):0.012048
):-0.00852745
):0.0279444
):-0.0155093
):0.0188339
):-0.0200673
):-0.00688179
):1.6346
):0.0962062
):4.58124
,
(
(
(
(
(
V3RF-ABDC01165520.1-igkv:-0
,
V98RF-ABDC01522041.1-igkv:-0
):0.165929
,
V58RF-ABDC01394567.1-igkv:0.165929
):1.20066
,
(
(
(
(
(
V206RF-AQIA01017120.1-igkv:-0
,
V51RF-AHZZ01104243.1-igkv:-0
):0.00530225
,
V31RF-AQIB01144265.1-igkv:0.00530225
):0.11583
,
(
V157RF-CABD02196542.1-igkv:0.0271437
,
(
V24RF-JABR01076260.1-igkv:0.0178517
,
(
V47RF-AHZZ01104241.1-igkv:0.0144702
,
(
V156RF-JYKQ01005033.1-igkv:0.00782629
,
(
V203RF-AQIA01017118.1-igkv:0.00519213
,
V27RF-AQIB01144264.1-igkv:0.00519213
):0.00263416
):0.00664393
):0.00338146
):0.00929205
):0.0939887
):0.144786
,
(
(
V107RF-AGCE01134619.1-igkv:0.0890605
,
(
V33RF-JZKE01097728.1-igkv:0.0613461
,
(
V61RF-AQIA01017150.1-igkv:0.0147209
,
(
V93RF-AHZZ01040808.1-igkv:0.00974675
,
V253RF-JYKQ01187347.1-igkv:0.00974675
):0.00497413
):0.0466252
):0.0277143
):0.168413
,
(
(
V53RF-AQIB01144282.1-igkv:0.0189205
,
(
V8RF-AHZZ01040804.1-igkv:0.00530225
,
V125RF-JYKQ01187337.1-igkv:0.00530225
):0.0136182
):0.235496
,
(
(
V178RF-AACZ03015561.1-igkv:0.0388607
,
(
V229RF-AQIA01017139.1-igkv:0.0253837
,
V52RF-AQIB01144282.1-igkv:0.0253837
):0.013477
):0.239522
,
(
(
V43RF-AQIB01144273.1-igkv:0.054699
,
(
V219RF-AQIA01017126.1-igkv:0.0191273
,
(
V261RF-AHZZ01189922.1-igkv:0.00535908
,
V212RF-JYKQ01076937.1-igkv:0.00535908
):0.0137682
):0.0355717
):0.0517113
,
(
(
(
V37RF-ADFV01106193.1-igkv:0.0675488
,
(
V132RF-ABGA01394066.1-igkv:0.046708
,
(
V18RF-AJFE01012236.1-igkv:0.0104605
,
V145RF-AACZ03151855.1-igkv:0.0104605
):0.0362476
):0.0208408
):0.0220536
,
(
(
V224RF-AQIB01144282.1-igkv:0.00774547
,
(
V57RF-AQIA01017139.1-igkv:0.00513877
,
V89RF-AHZZ01040804.1-igkv:0.00513877
):0.0026067
):0.0877112
,
(
(
(
V204RF-AQIA01017118.1-igkv:0.0103522
,
V154RF-JYKQ01005032.1-igkv:0.0103522
):0.0223936
,
(
V48RF-AHZZ01104241.1-igkv:0.0219317
,
V28RF-AQIB01144264.1-igkv:0.0219317
):0.0108141
):0.0518526
,
(
(
V51RF-AGCE01134616.1-igkv:0.0319889
,
V54RF-AGCE01134617.1-igkv:0.0319889
):0.0526865
,
(
(
V84RF-ABGA01285645.1-igkv:0.0165024
,
V110RF-ABGA01321410.1-igkv:0.0165024
):0.0739188
,
(
V33RF-ADFV01106193.1-igkv:0.070587
,
(
(
V136RF-ABGA01394075.1-igkv:0.0264584
,
V45RF-CABD02196588.1-igkv:0.0264584
):0.0256457
,
(
V180RF-AACZ03015562.1-igkv:0.0710607
,
(
V116RF-ABGA01356726.1-igkv:0.0462678
,
(
(
V24RF-AJFE01012249.1-igkv:0.0103522
,
V151RF-AACZ03151858.1-igkv:0.0103522
):0.0301898
,
(
V88RF-ABGA01290070.1-igkv:0.0320311
,
(
V221RF-ABGA01315458.1-igkv:0.0210101
,
V39RF-JABR01076265.1-igkv:0.0210101
):0.011021
):0.00851095
):0.00572581
):0.0247929
):-0.0189567
):0.018483
):0.0198342
):-0.00574584
):-7.70912e-05
):0.0108583
):-0.00585429
):0.0103701
,
(
(
V216RF-AQIA01017123.1-igkv:0.0404544
,
(
V239RF-AHZZ01106331.1-igkv:0.00513877
,
V142RF-JYKQ01005004.1-igkv:0.00513877
):0.0353156
):0.0375368
,
(
V259RF-AHZZ01185532.1-igkv:0.0892
,
(
(
V35RF-JABR01076263.1-igkv:0.0320311
,
(
V222RF-AQIA01017128.1-igkv:0.0103522
,
V67RF-AHZZ01109398.1-igkv:0.0103522
):0.0216789
):0.0232907
,
(
(
(
V79RF-AHZZ01143621.1-igkv:-0
,
V249RF-AHZZ01111138.1-igkv:-0
):0
,
V252RF-AHZZ01111367.1-igkv:-0
):0.0535543
,
(
V226RF-AHZZ01104243.1-igkv:0.0558182
,
(
V228RF-AQIA01017135.1-igkv:0.0472121
,
(
V244RF-AHZZ01107395.1-igkv:0.0582716
,
(
(
V148RF-JYKQ01005018.1-igkv:-0
,
V150RF-JYKQ01005019.1-igkv:-0
):0.0516095
,
(
V256RF-AQIA01075132.1-igkv:0.0469941
,
(
V224RF-AQIA01017128.1-igkv:0.0296561
,
(
V210RF-AQIA01017120.1-igkv:0.0212536
,
(
(
V73RF-AHZZ01117754.1-igkv:-0
,
V35RF-AQIB01144265.1-igkv:-0
):0.0210502
,
(
V37RF-JABR01076263.1-igkv:0.0103522
,
V143RF-JYKQ01005007.1-igkv:0.0103522
):0.010698
):0.000203455
):0.00840252
):0.0173379
):0.00461539
):0.0066621
):-0.0110595
):0.00860609
):-0.00226387
):0.00176744
):0.0338783
):-0.0112088
):0.0219812
):0.00643788
):0.171972
):-0.0239654
):0.00305647
):0.00844494
):0.884789
,
(
(
(
(
V160RF-CABD02196553.1-igkv:0.0292236
,
(
V11RF-AJFE01012232.1-igkv:0.015642
,
V137RF-AACZ03151853.1-igkv:0.015642
):0.0135817
):0.0446329
,
(
V193RF-AQIA01007908.1-igkv:0.0789014
,
(
(
V112RF-ABGA01342015.1-igkv:0.015642
,
V142RF-AACZ03151853.1-igkv:0.015642
):0.0474052
,
(
(
V105RF-AHZZ01042084.1-igkv:0.0158068
,
V179RF-JYKQ01052440.1-igkv:0.0158068
):0.0530317
,
(
(
V260RF-AHZZ01189918.1-igkv:0.0103522
,
V209RF-JYKQ01076935.1-igkv:0.0103522
):0.0406382
,
(
(
V49RF-AQIB01144276.1-igkv:0.0237342
,
(
V250RF-AHZZ01111138.1-igkv:0.015642
,
V253RF-AHZZ01111367.1-igkv:0.015642
):0.00809225
):0.01243
,
(
V53RF-AGCE01134616.1-igkv:0.044195
,
(
V50RF-AQIB01144276.1-igkv:0.0321576
,
(
V40RF-JABR01076266.1-igkv:0.0237342
,
(
V36RF-JABR01076263.1-igkv:0.0210101
,
V41RF-JABR01076266.1-igkv:0.0210101
):0.00272415
):0.00842334
):0.0120374
):-0.00803077
):0.0148262
):0.0178482
):-0.0057913
):0.0158542
):-0.0050449
):0.0156387
,
(
(
(
V196RF-AQIA01017118.1-igkv:0.015642
,
V19RF-AQIB01144257.1-igkv:0.015642
):0.0408513
,
(
(
V55RF-AQIA01017115.1-igkv:0.015642
,
V183RF-JYKQ01052440.1-igkv:0.015642
):0.0248562
,
(
V140RF-ADFV01132961.1-igkv:0.0319889
,
V155RF-ABGA01161530.1-igkv:0.0319889
):0.0085093
):0.0159951
):0.0317188
,
(
(
(
(
V48RF-AGCE01134612.1-igkv:0.0103522
,
V49RF-AGCE01134613.1-igkv:0.0103522
):0.0538073
,
(
V218RF-AQIA01017126.1-igkv:0.050291
,
(
(
(
V23RF-AJFE01012245.1-igkv:-0
,
V149RF-AACZ03151857.1-igkv:-0
):0.0264584
,
V43RF-CABD02196586.1-igkv:0.0264584
):0.0161165
,
(
V115RF-ABGA01356724.1-igkv:0.0390417
,
(
(
V123RF-AJFE01047586.1-igkv:-0
,
V179RF-AACZ03015562.1-igkv:-0
):0.0264584
,
V134RF-ABGA01394068.1-igkv:0.0264584
):0.0125833
):0.00353321
):0.00771615
):0.0138685
):0.00974493
,
(
V39RF-AQIB01144273.1-igkv:0.0841267
,
(
V102RF-ADFV01106214.1-igkv:0.0842426
,
(
V51RF-AQIA01017115.1-igkv:0.0896547
,
(
(
V211RF-AQIA01017120.1-igkv:0.0210101
,
V36RF-AQIB01144265.1-igkv:0.0210101
):0.0498696
,
(
V50RF-JABR01088351.1-igkv:0.0769887
,
(
V154RF-AACZ03151979.1-igkv:0.0667893
,
(
(
V161RF-CABD02196556.1-igkv:0.0187181
,
(
V10RF-AJFE01012232.1-igkv:0.010571
,
V136RF-AACZ03151853.1-igkv:0.010571
):0.00814705
):0.0467299
,
(
V36RF-ADFV01106193.1-igkv:0.0483962
,
(
(
V72RF-AHZZ01117753.1-igkv:0.0210101
,
V149RF-JYKQ01005018.1-igkv:0.0210101
):0.0234145
,
(
V34RF-AQIB01144265.1-igkv:0.0430278
,
(
V32RF-JABR01076263.1-igkv:0.0406202
,
(
V29RF-JABR01076261.1-igkv:0.0353917
,
(
V220RF-AQIA01017128.1-igkv:0.0401739
,
(
V215RF-AQIA01017123.1-igkv:0.0384465
,
(
V238RF-AHZZ01106331.1-igkv:0.0225152
,
(
V151RF-JYKQ01005022.1-igkv:0.0185515
,
(
V209RF-AQIA01017120.1-igkv:0.010571
,
V144RF-JYKQ01005012.1-igkv:0.010571
):0.00798045
):0.00396371
):0.0159313
):0.00172741
):-0.00478228
):0.00522852
):0.00240766
):0.00139672
):0.00397164
):0.0170518
):0.00134131
):0.0101994
):-0.00610911
):0.0187751
):-0.00541215
):-0.000115924
):-0.0102222
):0.0106345
,
(
(
V32RF-AQIB01144265.1-igkv:0.0344988
,
(
V153RF-JYKQ01005027.1-igkv:0.0189205
,
(
V207RF-AQIA01017120.1-igkv:0.0161471
,
V52RF-AHZZ01104243.1-igkv:0.0161471
):0.00277333
):0.0155783
):0.0488838
,
(
(
(
(
(
V208RF-AQIA01017120.1-igkv:-0
,
V53RF-AHZZ01104243.1-igkv:-0
):0
,
V152RF-JYKQ01005026.1-igkv:-0
):0.00530225
,
V33RF-AQIB01144265.1-igkv:0.00530225
):0.0426488
,
(
V150RF-AACZ03151857.1-igkv:0.0264584
,
V39RF-CABD02196563.1-igkv:0.0264584
):0.0214927
):0.0138524
,
(
V66RF-AHZZ01109397.1-igkv:0.0609246
,
(
(
V247RF-AHZZ01110488.1-igkv:0.0292447
,
(
V45RF-AQIB01144274.1-igkv:0.0237342
,
(
V82RF-AHZZ01176978.1-igkv:0.0103522
,
(
V248RF-AHZZ01111138.1-igkv:-0
,
V251RF-AHZZ01111367.1-igkv:-0
):0.0103522
):0.0133821
):0.00551049
):0.0314975
,
(
(
V145RF-JYKQ01005013.1-igkv:0.00774547
,
(
V214RF-AQIA01017123.1-igkv:0.00513877
,
V237RF-AHZZ01106331.1-igkv:0.00513877
):0.0026067
):0.0403725
,
(
V109RF-ABGA01321409.1-igkv:0.0614294
,
(
V211RF-JYKQ01076937.1-igkv:0.046956
,
(
V44RF-CABD02196587.1-igkv:0.0501857
,
(
V38RF-ADFV01106195.1-igkv:0.0330417
,
(
V117RF-ABGA01356729.1-igkv:0.034873
,
(
V113RF-ABGA01356721.1-igkv:0.0461065
,
(
V65RF-AHZZ01109397.1-igkv:0.0283852
,
(
V223RF-AQIA01017128.1-igkv:0.0213506
,
(
V146RF-JYKQ01005014.1-igkv:0.0190266
,
(
V38RF-AQIB01144269.1-igkv:0.0170432
,
(
V236RF-AHZZ01106331.1-igkv:0.0129971
,
(
V213RF-AQIA01017123.1-igkv:0.0103522
,
V217RF-AQIA01017125.1-igkv:0.0103522
):0.0026449
):0.00404612
):0.00198344
):0.00232396
):0.0070346
):0.0177213
):-0.0112334
):-0.00183133
):0.017144
):-0.00322964
):0.0144734
):-0.0133115
):0.0126243
):0.000182405
):0.000878789
):0.0215792
):0.00115627
):0.00367323
):0.00128312
):0.42759
,
(
(
(
V138RF-ADFV01132961.1-igkv:0.107413
,
(
(
V96RF-AHZZ01042078.1-igkv:0.0264584
,
V185RF-JYKQ01052440.1-igkv:0.0264584
):0.046886
,
(
(
V12RF-AJFE01012232.1-igkv:0.0490951
,
V18RF-AQIB01144251.1-igkv:0.0490951
):0.0118558
,
V98RF-JABR01061517.1-igkv:0.0609509
):0.0123935
):0.0340682
):0.0172655
,
(
(
V4RF-JZKE01218258.1-igkv:0.132466
,
(
(
(
V44RF-AQIA01017097.1-igkv:0.0210101
,
V192RF-JYKQ01052444.1-igkv:0.0210101
):0.00544831
,
V119RF-AHZZ01042093.1-igkv:0.0264584
):0.0898002
,
(
V27RF-JABR01076261.1-igkv:0.102044
,
(
(
(
V37RF-AQIA01017096.1-igkv:0.0264584
,
(
V111RF-AHZZ01042093.1-igkv:0.0210101
,
V3RF-AQIB01144236.1-igkv:0.0210101
):0.00544831
):0.0241877
,
(
V132RF-ADFV01132961.1-igkv:0.0419457
,
(
(
V7RF-AJFE01011588.1-igkv:0.0103522
,
V183RF-AACZ03015754.1-igkv:0.0103522
):0.0133821
,
(
V194RF-ABGA01257772.1-igkv:0.015642
,
V48RF-CABD02199693.1-igkv:0.015642
):0.00809225
):0.0182115
):0.0087004
):0.0428117
,
(
(
V154RF-CABD02196515.1-igkv:0.0129971
,
(
V83RF-AJFE01002289.1-igkv:0.00513877
,
V181RF-AACZ03015562.1-igkv:0.00513877
):0.0078583
):0.0815758
,
(
V44RF-AQIB01144274.1-igkv:0.0720571
,
(
V262RF-AHZZ01189923.1-igkv:0.0861131
,
(
(
V208RF-JYKQ01075085.1-igkv:0.0347963
,
(
V245RF-AHZZ01107399.1-igkv:0.00513877
,
V176RF-JYKQ01044662.1-igkv:0.00513877
):0.0296576
):0.0346777
,
(
(
V84RF-AJFE01002352.1-igkv:-0
,
V47RF-CABD02196595.1-igkv:-0
):0.0862294
,
(
V107RF-ABGA01318850.1-igkv:0.0642266
,
(
V85RF-ABGA01285648.1-igkv:0.0619035
,
(
V31RF-JABR01076261.1-igkv:0.055255
,
(
V152RF-AACZ03151858.1-igkv:0.0497794
,
(
V158RF-ABGA01180644.1-igkv:0.0553868
,
(
(
V21RF-AJFE01012238.1-igkv:0.00513877
,
V146RF-AACZ03151855.1-igkv:0.00513877
):0.036431
,
(
V42RF-AQIB01144273.1-igkv:0.036934
,
(
V86RF-ABGA01285649.1-igkv:0.0334137
,
(
(
V39RF-ADFV01106195.1-igkv:0.0103522
,
V147RF-AACZ03151855.1-igkv:0.0103522
):0.0106579
,
V156RF-CABD02196521.1-igkv:0.0210101
):0.0124036
):0.00352035
):0.00463572
):0.0138171
):-0.00560738
):0.00547551
):0.00664858
):0.00232305
):0.0220028
):-0.0167553
):0.016639
):-0.014056
):0.0225157
):-0.00111501
):0.00858568
):0.014215
):0.0162071
):-0.0135902
,
(
(
V47RF-AGCE01134610.1-igkv:0.0910577
,
(
(
V47RF-AQIB01144276.1-igkv:0.0418797
,
(
V225RF-AQIA01017130.1-igkv:0.0237342
,
(
V226RF-AQIA01017133.1-igkv:0.0103522
,
V174RF-JYKQ01044654.1-igkv:0.0103522
):0.0133821
):0.0181455
):0.0388671
,
(
(
V177RF-AACZ03015561.1-igkv:0.0319889
,
V153RF-CABD02196513.1-igkv:0.0319889
):0.055151
,
(
V50RF-JYKQ01051984.1-igkv:0.078253
,
(
V57RF-AHZZ01105091.1-igkv:0.0775499
,
(
V50RF-AGCE01134614.1-igkv:0.0671551
,
(
V157RF-ABGA01180641.1-igkv:0.0572429
,
(
(
V227RF-AQIA01017135.1-igkv:0.0103522
,
V140RF-AQIB01156901.1-igkv:0.0103522
):0.03888
,
(
V215RF-JYKQ01081225.1-igkv:0.0458647
,
(
V48RF-JYKQ01051981.1-igkv:0.0537818
,
(
V154RF-ABGA01154386.1-igkv:0.037647
,
(
V40RF-ADFV01106195.1-igkv:0.0264584
,
V34RF-JABR01076263.1-igkv:0.0264584
):0.0111886
):0.0161348
):-0.0079171
):0.00336745
):0.00801073
):0.00991226
):0.0103947
):0.000703186
):0.00888682
):-0.00639306
):0.0103109
):0.00307793
,
(
V37RF-AGCE01134600.1-igkv:0.0986106
,
(
(
(
V41RF-AQIB01144273.1-igkv:0.0376037
,
V210RF-JYKQ01076937.1-igkv:0.0376037
):0.0250077
,
(
V194RF-JYKQ01052444.1-igkv:0.0583678
,
(
V103RF-AHZZ01042083.1-igkv:0.0589289
,
(
V186RF-JYKQ01052441.1-igkv:0.0358544
,
(
V47RF-JABR01088351.1-igkv:0.034105
,
(
V49RF-JABR01088351.1-igkv:0.0223922
,
(
(
V49RF-AQIA01017105.1-igkv:-0
,
V118RF-AQIA01058133.1-igkv:-0
):0.018326
,
(
V108RF-AHZZ01042085.1-igkv:0.00513877
,
V14RF-AQIB01144243.1-igkv:0.00513877
):0.0131872
):0.00406618
):0.0117128
):0.00174937
):0.0230745
):-0.000561088
):0.00424363
):0.0148425
,
(
V38RF-CABD02196554.1-igkv:0.0705944
,
(
V50RF-AQIA01017109.1-igkv:0.0662586
,
(
V135RF-ABGA01394071.1-igkv:0.0747883
,
(
V58RF-ADFV01138112.1-igkv:0.0551185
,
(
V121RF-AHZZ01042093.1-igkv:0.0483942
,
(
(
V197RF-AACZ03151873.1-igkv:0.00513877
,
V215RF-AACZ03183442.1-igkv:0.00513877
):0.0270134
,
(
(
V170RF-CABD02379503.1-igkv:0.00774547
,
(
V163RF-CABD02196901.1-igkv:0.00513877
,
V169RF-CABD02379427.1-igkv:0.00513877
):0.0026067
):0.0137087
,
(
V198RF-AACZ03151911.1-igkv:0.0249285
,
(
V0RF-CABD02043817.1-igkv:0.0153114
,
(
V208RF-AACZ03178854.1-igkv:0.0149807
,
(
V214RF-AACZ03179806.1-igkv:0.00904881
,
(
V120RF-AACZ03126842.1-igkv:0.00774547
,
(
V55RF-AACZ03070936.1-igkv:0.00513877
,
V209RF-AACZ03179013.1-igkv:0.00513877
):0.0026067
):0.00130335
):0.00593193
):0.000330613
):0.00961718
):-0.0034744
):0.0106981
):0.016242
):0.00672428
):0.0196698
):-0.00852969
):0.00433576
):0.0068595
):0.0211567
):-0.00447499
):0.0247398
):0.00580269
):0.33093
,
(
(
V205RF-AQIA01017118.1-igkv:0.00513877
,
V49RF-AHZZ01104241.1-igkv:0.00513877
):0.176742
,
(
V185RF-AACZ03016143.1-igkv:0.161216
,
(
(
V59RF-AQIA01017140.1-igkv:0.0103522
,
V92RF-AHZZ01040807.1-igkv:0.0103522
):0.128259
,
(
(
V136RF-ADFV01132961.1-igkv:0.0934764
,
(
(
V47RF-AQIA01017099.1-igkv:0.0433051
,
V123RF-AHZZ01042093.1-igkv:0.0433051
):0.0161759
,
(
(
V100RF-AHZZ01042080.1-igkv:0.0210101
,
V15RF-AQIB01144243.1-igkv:0.0210101
):0.022295
,
V48RF-JABR01088351.1-igkv:0.0433051
):0.0161759
):0.0339954
):0.029487
,
(
V76RF-ABGA01198108.1-igkv:0.112817
,
(
V38RF-AGCE01134600.1-igkv:0.100765
,
(
(
V33RF-AGCE01134599.1-igkv:0.0433494
,
(
V44RF-JABR01088351.1-igkv:0.0103522
,
V196RF-JYKQ01052450.1-igkv:0.0103522
):0.0329973
):0.048172
,
(
(
V144RF-ADFV01132961.1-igkv:0.0380123
,
V42RF-AGCE01134604.1-igkv:0.0380123
):0.0505538
,
(
(
V11RF-AQIB01144242.1-igkv:0.0210101
,
V188RF-JYKQ01052443.1-igkv:0.0210101
):0.0619376
,
(
V182RF-AACZ03015564.1-igkv:0.0716092
,
(
V159RF-ABGA01180644.1-igkv:0.0388565
,
V197RF-ABGA01276916.1-igkv:0.0388565
):0.0327527
):0.0113385
):0.00561833
):0.00295536
):0.00924318
):0.0120523
):0.0101465
):0.0156477
):0.0226049
):0.020665
):0.33093
):0.0966597
):0.457199
):0.315868
):0.735544
,
(
(
(
(
V135RF-ADFV01132961.1-igkv:0.123466
,
(
V22RF-JABR01076259.1-igkv:0.0994756
,
(
V37RF-ABDC01360666.1-igkv:0.0898288
,
(
V35RF-AGCE01134600.1-igkv:0.0857797
,
(
(
V137RF-ADFV01132961.1-igkv:0.0372039
,
V130RF-ABGA01394062.1-igkv:0.0372039
):0.0381811
,
(
V39RF-AGCE01134602.1-igkv:0.0910156
,
(
V41RF-AGCE01134603.1-igkv:0.0534987
,
(
(
V15RF-AJFE01012234.1-igkv:-0
,
V141RF-AACZ03151853.1-igkv:-0
):0.0738128
,
(
V9RF-AJFE01012232.1-igkv:0.0747673
,
(
(
V14RF-AJFE01012234.1-igkv:0.00488761
,
V140RF-AACZ03151853.1-igkv:0.00488761
):0.0590519
,
(
V9RF-AQIB01144240.1-igkv:0.0671035
,
(
V43RF-AGCE01134604.1-igkv:0.0542172
,
(
V142RF-ADFV01132961.1-igkv:0.0559021
,
(
V36RF-AQIA01017094.1-igkv:0.0557307
,
(
(
V53RF-JYKQ01052451.1-igkv:0.035478
,
(
(
V115RF-AHZZ01042093.1-igkv:0.00974675
,
V4RF-AQIB01144236.1-igkv:0.00974675
):0.0151316
,
V43RF-JABR01088351.1-igkv:0.0248784
):0.0105996
):0.0159306
,
(
V141RF-AQIB01158310.1-igkv:0.0404654
,
(
V36RF-AGCE01134600.1-igkv:0.0397911
,
(
V109RF-AHZZ01042091.1-igkv:0.0330278
,
(
V12RF-AQIB01144242.1-igkv:0.022545
,
(
V48RF-AQIA01017100.1-igkv:0.0199615
,
V106RF-AHZZ01042085.1-igkv:0.0199615
):0.00258349
):0.0104828
):0.00676329
):0.000674292
):0.0109432
):0.00432214
):0.000171401
):-0.00168493
):0.0128863
):-0.00316395
):0.0108278
):-0.000954539
):-0.0203141
):0.0375169
):-0.0156305
):0.0103947
):0.0040491
):0.00964681
):0.0239906
):0.0270216
,
(
(
V32RF-JZKE01296733.1-igkv:0.055597
,
(
V30RF-ABDC01351837.1-igkv:0.0465544
,
V143RF-ABDC01562688.1-igkv:0.0465544
):0.00904256
):0.0587398
,
(
(
V16RF-AJFE01012235.1-igkv:-0
,
V143RF-AACZ03151853.1-igkv:-0
):0.0770205
,
(
V159RF-CABD02196547.1-igkv:0.0544237
,
(
V197RF-AQIA01017118.1-igkv:0.0261813
,
V178RF-JYKQ01052439.1-igkv:0.0261813
):0.0282424
):0.0225968
):0.0373163
):0.0361511
):0.400664
,
(
(
(
V111RF-ABGA01335280.1-iglv:0.0369781
,
(
(
V112RF-AJFE01022798.1-iglv:-0
,
V196RF-AACZ03127321.1-iglv:-0
):0.0205777
,
V49RF-CABD02231299.1-iglv:0.0205777
):0.0164004
):0.0253602
,
(
V5RF-JABR01043229.1-iglv:0.0443103
,
(
V135RF-JABR01077603.1-iglv:0.0340667
,
(
V31RF-AQIA01007605.1-iglv:0.0153224
,
(
V30RF-AHZZ01097944.1-iglv:-0
,
V82RF-JYKQ01114545.1-iglv:-0
):0.0153224
):0.0187443
):0.0102436
):0.018028
):0.338846
,
(
(
(
V102RF-AGCE01112648.1-iglv:0.1028
,
(
V113RF-JABR01071856.1-iglv:0.0529247
,
(
V175RF-ABGA01252219.1-iglv:0.0386772
,
(
(
V11RF-AQIA01007576.1-iglv:0.0154805
,
V75RF-AQIB01146137.1-iglv:0.0154805
):0.0161708
,
(
V89RF-AJFE01010827.1-iglv:-0
,
V124RF-AACZ03127131.1-iglv:-0
):0.0316513
):0.00702585
):0.0142475
):0.0498757
):0.0623125
,
(
(
V86RF-ABDC01449636.1-iglv:0.0237342
,
(
V25RF-ABDC01349230.1-iglv:0.00513877
,
V52RF-ABDC01384523.1-iglv:0.00513877
):0.0185954
):0.0842849
,
(
V24RF-ABDC01349227.1-iglv:0.0630486
,
V26RF-JZKE01249957.1-iglv:0.0630486
):0.0449704
):0.0570938
):0.0674505
,
(
(
(
(
V95RF-AJFE01017581.1-iglv:-0
,
V133RF-AACZ03127143.1-iglv:-0
):0.0104605
,
V65RF-CABD02231431.1-iglv:0.0104605
):0.111351
,
(
(
(
(
V34RF-AQIA01009600.1-iglv:0.0207916
,
V235RF-AHZZ01105201.1-iglv:0.0207916
):0.0164123
,
V225RF-JYKQ01126546.1-iglv:0.0372039
):0.0271585
,
(
(
V13RF-AQIA01007576.1-iglv:0.0154805
,
V271RF-AHZZ01198553.1-iglv:0.0154805
):0.0496088
,
(
V231RF-AHZZ01105200.1-iglv:0.055162
,
(
(
V7RF-AQIA01007576.1-iglv:0.0316513
,
V230RF-AHZZ01105199.1-iglv:0.0316513
):0.0112114
,
(
V114RF-JABR01071856.1-iglv:0.0457909
,
(
V117RF-JABR01071856.1-iglv:0.0261813
,
V227RF-JYKQ01126546.1-iglv:0.0261813
):0.0196097
):-0.00292818
):0.0122993
):0.00992735
):-0.000726968
):0.04599
,
(
V30RF-JZKE01249959.1-iglv:0.0958744
,
(
V101RF-AGCE01112648.1-iglv:0.087905
,
(
V172RF-ABGA01252218.1-iglv:0.0647219
,
(
V62RF-CABD02231422.1-iglv:0.0592103
,
(
V51RF-ADFV01126759.1-iglv:0.0573765
,
(
(
V173RF-ABGA01252219.1-iglv:0.00508649
,
V174RF-ABGA01252219.1-iglv:0.00508649
):0.0449654
,
(
V123RF-AACZ03127131.1-iglv:0.0316926
,
(
V88RF-AJFE01010827.1-iglv:0.0207916
,
V91RF-AJFE01010828.1-iglv:0.0207916
):0.010901
):0.0183594
):0.00732454
):0.00183385
):0.00551163
):0.0231831
):0.00796942
):0.014478
):0.0114592
):0.0440522
,
(
(
V116RF-JABR01071856.1-iglv:0.0380123
,
V73RF-AQIB01146137.1-iglv:0.0380123
):0.103688
,
(
(
(
V267RF-AHZZ01198551.1-iglv:0.0333893
,
(
V106RF-JABR01071855.1-iglv:0.0240589
,
(
V2RF-AQIA01007574.1-iglv:0.0161471
,
V219RF-JYKQ01126545.1-iglv:0.0161471
):0.00791172
):0.00933044
):0.0183994
,
(
V53RF-ADFV01126760.1-iglv:0.0429056
,
(
(
(
V97RF-AJFE01017584.1-iglv:-0
,
V129RF-AACZ03127139.1-iglv:-0
):0.0207916
,
V170RF-ABGA01252215.1-iglv:0.0207916
):0.00538962
,
V63RF-CABD02231427.1-iglv:0.0261813
):0.0167244
):0.00888313
):0.050489
,
(
(
(
V92RF-AJFE01010829.1-iglv:-0
,
V121RF-AACZ03127129.1-iglv:-0
):0.0104605
,
V56RF-CABD02231410.1-iglv:0.0104605
):0.0872066
,
(
V270RF-AHZZ01198553.1-iglv:0.0590831
,
(
V57RF-CABD02231415.1-iglv:0.0316926
,
(
V122RF-AACZ03127129.1-iglv:0.0207916
,
V125RF-AACZ03127135.1-iglv:0.0207916
):0.010901
):0.0273905
):0.038584
):0.00461066
):0.0394227
):0.0241634
):0.0666996
):0.16862
):0.149968
):1.66742
,
(
(
(
V111RF-AJFE01022798.1-iglv:-0
,
V195RF-AACZ03127321.1-iglv:-0
):0.308172
,
(
V65RF-AQIB01146122.1-iglv:0.0952104
,
(
(
V19RF-JZKE01249933.1-iglv:0.0203681
,
V82RF-JZKE01238800.1-iglv:0.0203681
):0.0619887
,
(
(
V21RF-AQIA01007587.1-iglv:0.00498507
,
V242RF-JYKQ01126585.1-iglv:0.00498507
):0.0704505
,
(
(
V248RF-JYKQ01126589.1-iglv:0.0364495
,
(
V200RF-AHZZ01089508.1-iglv:0.0364697
,
(
V26RF-AQIA01007589.1-iglv:0.0203681
,
V129RF-JABR01071862.1-iglv:0.0203681
):0.0161016
):-2.0247e-05
):0.0265276
,
(
V106RF-AJFE01020632.1-iglv:0.0593806
,
(
V42RF-ADFV01126738.1-iglv:0.0519932
,
(
V105RF-AJFE01020631.1-iglv:0.0350915
,
(
V191RF-AHZZ01089506.1-iglv:0.021744
,
(
(
V16RF-AQIA01007586.1-iglv:0.0100403
,
V62RF-AQIB01146122.1-iglv:0.0100403
):0.00512712
,
V239RF-JYKQ01126581.1-iglv:0.0151675
):0.00657658
):0.0133474
):0.0169017
):0.00738741
):0.00359643
):0.0124585
):0.0069212
):0.0128536
):0.212962
):1.44647
,
(
(
V35RF-AQIA01009608.1-iglv:0.20986
,
(
(
V104RF-AGCE01112674.1-iglv:0.138998
,
(
V130RF-JABR01071862.1-iglv:0.109631
,
(
(
V118RF-JABR01071859.1-iglv:0.0448447
,
(
(
V14RF-AQIA01007584.1-iglv:0.0100403
,
V196RF-AHZZ01089506.1-iglv:0.0100403
):0.0156037
,
V66RF-AQIB01146123.1-iglv:0.0256441
):0.0192007
):0.0500427
,
(
(
V76RF-JABR01189674.1-iglv:-0
,
V127RF-JABR01071862.1-iglv:-0
):0.0769471
,
(
(
(
V183RF-ABGA01252241.1-iglv:0.0203681
,
V186RF-ABGA01252243.1-iglv:0.0203681
):0.0347533
,
(
V124RF-JABR01071861.1-iglv:0.0475597
,
(
V58RF-AQIB01146122.1-iglv:0.0323552
,
(
V249RF-JYKQ01126589.1-iglv:0.0230061
,
(
V23RF-AQIA01007588.1-iglv:0.0100403
,
V201RF-AHZZ01089508.1-iglv:0.0100403
):0.0129657
):0.00934909
):0.0152046
):0.00756163
):0.00294307
,
(
(
V3RF-JABR01016432.1-iglv:0.0337132
,
(
V22RF-AQIA01007587.1-iglv:0.0256441
,
V243RF-JYKQ01126585.1-iglv:0.0256441
):0.00806913
):0.0257969
,
(
(
(
V104RF-AJFE01020631.1-iglv:0.0203681
,
V172RF-AACZ03176953.1-iglv:0.0203681
):0.00531452
,
(
V54RF-CABD02231362.1-iglv:0.0100403
,
V55RF-CABD02231364.1-iglv:0.0100403
):0.0156423
):0.0233088
,
(
V43RF-ADFV01126738.1-iglv:0.0364697
,
(
V47RF-ADFV01126742.1-iglv:0.0203681
,
V131RF-ADFV01132918.1-iglv:0.0203681
):0.0161016
):0.0125216
):0.0105187
):-0.00144569
):0.0188827
):0.0179403
):0.014744
):0.0293668
):-0.00351775
,
(
(
(
V18RF-ABDC01318810.1-iglv:0.0368125
,
(
V75RF-ABDC01422153.1-iglv:-0
,
V88RF-ABDC01466438.1-iglv:-0
):0.0368125
):0.0408832
,
V79RF-JZKE01238797.1-iglv:0.0776957
):0.0655365
,
(
(
V17RF-AQIA01007586.1-iglv:0.0626156
,
(
V192RF-AHZZ01089506.1-iglv:0.0395997
,
(
(
V107RF-AJFE01020634.1-iglv:-0
,
V51RF-CABD02231359.1-iglv:-0
):0.0364292
,
V185RF-ABGA01252243.1-iglv:0.0364292
):0.00317048
):0.0230158
):0.050377
,
(
V110RF-AGCE01135277.1-iglv:0.12117
,
(
(
V18RF-AQIA01007586.1-iglv:0.0421646
,
(
V63RF-AQIB01146122.1-iglv:0.0313208
,
V241RF-JYKQ01126581.1-iglv:0.0313208
):0.0108438
):0.0159081
,
(
V121RF-JABR01071860.1-iglv:0.0611511
,
(
(
V194RF-AHZZ01089506.1-iglv:0.0205777
,
V238RF-JYKQ01126580.1-iglv:0.0205777
):0.0331012
,
(
(
V20RF-AQIA01007586.1-iglv:0.0313612
,
(
V122RF-JABR01071860.1-iglv:0.0203681
,
V128RF-JABR01071862.1-iglv:0.0203681
):0.0109931
):0.0230139
,
(
(
V19RF-AQIA01007586.1-iglv:0.00503527
,
V193RF-AHZZ01089506.1-iglv:0.00503527
):0.0435727
,
(
V237RF-JYKQ01126580.1-iglv:0.0354603
,
(
V64RF-AQIB01146122.1-iglv:0.0361571
,
(
V56RF-AQIB01146122.1-iglv:0.0340667
,
(
(
V25RF-AQIA01007589.1-iglv:0.0101422
,
V247RF-JYKQ01126589.1-iglv:0.0101422
):0.0143355
,
(
V102RF-AJFE01020628.1-iglv:0.0151675
,
V44RF-AHZZ01099973.1-iglv:0.0151675
):0.00931022
):0.00958899
):0.00209041
):-0.000696801
):0.0131477
):0.00576713
):-0.000696212
):0.00747222
):-0.00307839
):0.0630974
):-0.00817751
):0.0302396
):-0.00775173
):0.0743799
):0.808634
,
(
V115RF-AGCE01147939.1-iglv:0.40779
,
(
(
(
V83RF-ABDC01442374.1-iglv:0.0805235
,
(
V72RF-ABDC01418168.1-iglv:0.0862831
,
(
(
V21RF-ABDC01342328.1-iglv:0.0309971
,
V131RF-ABDC01425625.1-iglv:0.0309971
):0.0253502
,
(
V70RF-ABDC01417539.1-iglv:0.0583681
,
(
(
(
V141RF-ABDC01540867.1-iglv:-0
,
V145RF-ABDC01624510.1-iglv:-0
):0.0283206
,
(
V80RF-JZKE01238797.1-iglv:0.0203681
,
V81RF-JZKE01238799.1-iglv:0.0203681
):0.0079525
):0.00919853
,
(
V21RF-JZKE01249944.1-iglv:0.0364697
,
(
V14RF-ABDC01296165.1-iglv:0.0256441
,
(
V33RF-ABDC01359388.1-iglv:-0
,
V134RF-ABDC01465190.1-iglv:-0
):0.0256441
):0.0108257
):0.0010494
):0.020849
):-0.00202083
):0.0299358
):-0.00575957
):0.0284243
,
(
(
V188RF-ABGA01252248.1-iglv:0.0457743
,
(
V134RF-JABR01077601.1-iglv:0.0411044
,
(
(
V30RF-AQIA01007600.1-iglv:0.0201628
,
(
V31RF-AHZZ01097949.1-iglv:0.00994053
,
V213RF-JYKQ01080923.1-iglv:0.00994053
):0.0102222
):0.0201433
,
(
V55RF-AQIB01146122.1-iglv:0.0323749
,
(
V41RF-AHZZ01099970.1-iglv:0.0283987
,
(
V27RF-AQIA01007590.1-iglv:0.0203681
,
V76RF-JYKQ01062966.1-iglv:0.0203681
):0.00803057
):0.00397625
):0.00793114
):0.000798315
):0.00466988
):0.0425814
,
(
V132RF-JABR01077601.1-iglv:0.0581688
,
(
V110RF-AJFE01022796.1-iglv:0.0259099
,
(
V50RF-CABD02231318.1-iglv:0.0153599
,
(
V174RF-AACZ03176987.1-iglv:0.0101422
,
V193RF-AACZ03127313.1-iglv:0.0101422
):0.00521776
):0.0105499
):0.0322589
):0.0301869
):0.0205922
):0.143978
,
(
V61RF-AQIB01146122.1-iglv:0.214159
,
(
(
V83RF-AQIB01146141.1-iglv:0.0183142
,
(
V265RF-AHZZ01198550.1-iglv:0.00524662
,
V222RF-JYKQ01126545.1-iglv:0.00524662
):0.0130676
):0.106583
,
(
(
V229RF-AHZZ01105199.1-iglv:0.0372039
,
V76RF-AQIB01146138.1-iglv:0.0372039
):0.060119
,
(
(
(
V105RF-JABR01071855.1-iglv:0.0154805
,
V111RF-JABR01071856.1-iglv:0.0154805
):0.0650322
,
(
V167RF-ABGA01252206.1-iglv:0.0624557
,
(
V64RF-CABD02231427.1-iglv:0.0730792
,
(
V90RF-AJFE01010827.1-iglv:0.0672108
,
(
V229RF-JYKQ01126546.1-iglv:0.0708815
,
(
V171RF-ABGA01252216.1-iglv:0.0593396
,
(
V98RF-AJFE01017584.1-iglv:0.0528279
,
(
V115RF-JABR01071856.1-iglv:0.0319512
,
(
V8RF-AQIA01007576.1-iglv:0.0303452
,
(
V232RF-JYKQ01126546.1-iglv:0.0233806
,
(
V227RF-AHZZ01105198.1-iglv:0.0208309
,
(
V5RF-AQIA01007575.1-iglv:0.0102461
,
V79RF-AQIB01146140.1-iglv:0.0102461
):0.0105848
):0.00254967
):0.00696462
):0.00160599
):0.0208767
):0.00651166
):0.0115419
):-0.00367063
):0.00586839
):-0.0106235
):0.018057
):-0.0152448
,
(
(
V61RF-CABD02231421.1-iglv:0.037994
,
(
V207RF-AACZ03177116.1-iglv:0.0323952
,
(
V178RF-ABGA01252219.1-iglv:0.0283206
,
(
V176RF-ABGA01252219.1-iglv:0.0203681
,
V177RF-ABGA01252219.1-iglv:0.0203681
):0.0079525
):0.00407457
):0.00559879
):0.0186565
,
(
(
V266RF-AHZZ01198551.1-iglv:0.0507499
,
(
V60RF-CABD02231419.1-iglv:0.0368857
,
(
(
V264RF-AHZZ01198550.1-iglv:-0
,
V221RF-JYKQ01126545.1-iglv:-0
):0.0221685
,
(
V82RF-AQIB01146141.1-iglv:0.0276182
,
(
V78RF-AQIB01146140.1-iglv:0.0205815
,
(
(
V272RF-AHZZ01198553.1-iglv:0.0100403
,
V218RF-JYKQ01126545.1-iglv:0.0100403
):0.00547852
,
(
V1RF-AQIA01007574.1-iglv:0.0102461
,
V4RF-AQIA01007574.1-iglv:0.0102461
):0.00527277
):0.0050626
):0.00703675
):-0.00544974
):0.0147172
):0.0138642
):-0.00133172
,
(
(
V72RF-AQIB01146136.1-iglv:0.0289978
,
(
V33RF-AQIA01009600.1-iglv:0.0154805
,
V68RF-AQIB01146133.1-iglv:0.0154805
):0.0135172
):0.00768186
,
(
V107RF-JABR01071855.1-iglv:0.0504676
,
(
V49RF-ADFV01126756.1-iglv:0.0365931
,
(
(
(
V99RF-AJFE01017586.1-iglv:-0
,
V216RF-AACZ03191230.1-iglv:-0
):0.0100403
,
V128RF-AACZ03127139.1-iglv:0.0100403
):0.026726
,
(
V224RF-JYKQ01126546.1-iglv:0.0206744
,
(
V234RF-AHZZ01105201.1-iglv:0.0102461
,
V104RF-JABR01071855.1-iglv:0.0102461
):0.0104283
):0.016092
):-0.000173293
):0.0138745
):-0.013788
):0.0127385
):0.00723232
):0.00861735
):0.032055
):0.0275744
):0.0892613
):0.0387674
):0.154864
):0.808634
):0.63784
):0.220949
):0.268778
):3.62724
,
(
(
(
(
V28RF-AJFE01038665.1-trgv:0.0306801
,
V168RF-CABD02337341.1-trgv:0.0306801
):0.03915
,
(
V90RF-ABGA01290201.1-trgv:0.0570661
,
(
V65RF-AQIA01046502.1-trgv:0.0281093
,
(
(
V0RF-AQIB01018214.1-trgv:0.0175892
,
(
V63RF-AQIA01046502.1-trgv:0.00493586
,
V1RF-AHZZ01030316.1-trgv:0.00493586
):0.0126533
):0.00919799
,
(
V2RF-AQIB01018217.1-trgv:0.0150156
,
V1RF-JYKQ01003191.1-trgv:0.0150156
):0.0117716
):0.00132208
):0.0289569
):0.012764
):0.0710353
,
(
(
(
V64RF-AQIA01046502.1-trgv:-0
,
V2RF-JYKQ01003191.1-trgv:-0
):0.0253837
,
(
V8RF-JABR01052882.1-trgv:0.0201628
,
V1RF-AQIB01018215.1-trgv:0.0201628
):0.0052209
):0.0572885
,
(
V96RF-ADFV01046571.1-trgv:0.0655237
,
(
(
V29RF-AJFE01038666.1-trgv:0.00994053
,
V2RF-AACZ03050973.1-trgv:0.00994053
):0.0470939
,
(
V91RF-ABGA01290201.1-trgv:0.0549362
,
(
V166RF-CABD02337338.1-trgv:0.0215237
,
(
V27RF-AJFE01038664.1-trgv:0.0175892
,
(
V92RF-ABGA01290202.1-trgv:0.00493586
,
V152RF-ABGA01132346.1-trgv:0.00493586
):0.0126533
):0.00393456
):0.0334124
):0.00209825
):0.0084893
):0.0171485
):0.0581933
):4.84319
,
(
(
(
(
(
V167RF-JYKQ01026663.1-trav:0.0794881
,
(
V20RF-CABD02105611.1-trdv:0.0320311
,
(
V86RF-AACZ03097622.1-trdv:0.015642
,
V210RF-AACZ03179105.1-trdv:0.015642
):0.0163891
):0.047457
):0.108049
,
(
V95RF-ABDC01497734.1-trdv:0.148528
,
(
V45RF-JZKE01143873.1-trdv:0.11939
,
V47RF-JZKE01143874.1-trdv:0.11939
):0.0291387
):0.0390084
):0.173817
,
(
(
V51RF-JZKE01143891.1-trav:0.128435
,
(
V88RF-AGCE01026527.1-trdv:0.0919721
,
(
V123RF-ABGA01386446.1-trdv:0.0646264
,
(
(
(
V72RF-AJFE01069976.1-trdv:-0
,
V82RF-AACZ03097619.1-trdv:-0
):0.0207916
,
V16RF-CABD02105598.1-trdv:0.0207916
):0.0339149
,
(
V36RF-AHZZ01098200.1-trav:0.0517634
,
(
V78RF-ADFV01192039.1-trdv:0.0443366
,
(
V186RF-JABR01098598.1-trav:0.0289163
,
(
(
V138RF-AQIA01064149.1-trav:0.0102461
,
V72RF-JYKQ01054957.1-trav:0.0102461
):0.0159352
,
V208RF-AQIB01128643.1-trav:0.0261813
):0.00273504
):0.0154203
):0.00742679
):0.00294316
):0.00991984
):0.0273457
):0.0364633
):0.176583
,
(
(
V79RF-AGCE01026520.1-trdv:0.0829724
,
(
V35RF-JZKE01143868.1-trav:0.06133
,
(
(
(
V226RF-ABGA01321072.1-trdv:0.0129971
,
(
V59RF-AACZ03095317.1-trdv:0.00513877
,
V27RF-CABD02105626.1-trdv:0.00513877
):0.0078583
):0.0176515
,
(
V172RF-JABR01098592.1-trdv:0.0320311
,
(
V197RF-AQIB01128637.1-trdv:0.0264995
,
(
V150RF-AQIA01064166.1-trdv:0.0210101
,
(
V2RF-AHZZ01035404.1-trdv:0.0103522
,
V120RF-JYKQ01135385.1-trdv:0.0103522
):0.0106579
):0.00548942
):0.00553157
):-0.00138249
):0.0142557
,
(
V78RF-AGCE01026520.1-trdv:0.0478963
,
(
V198RF-AQIB01128637.1-trav:0.0337914
,
(
(
V121RF-JYKQ01135388.1-trav:0.0129163
,
(
V151RF-AQIA01064166.1-trav:0.00513877
,
V3RF-AHZZ01035404.1-trav:0.00513877
):0.00777758
):0.014241
,
(
V171RF-JABR01098590.1-trav:0.019668
,
(
V93RF-ADFV01192049.1-trav:0.018326
,
(
V60RF-AACZ03095317.1-trav:0.0051257
,
(
(
V116RF-AJFE01024276.1-trav:-0
,
V225RF-ABGA01321070.1-trav:-0
):0
,
V28RF-CABD02105626.1-trav:-0
):0.0051257
):0.0132003
):0.00134202
):0.00748928
):0.00663404
):0.0141049
):-0.00299203
):0.0164258
):0.0216423
):0.161668
,
(
(
(
V193RF-JABR01098600.1-trav:0.0326908
,
(
V219RF-AQIB01128644.1-trav:0.0224328
,
(
V66RF-JYKQ01054942.1-trav:0.0129971
,
(
V132RF-AQIA01064146.1-trav:0.00513877
,
V62RF-AHZZ01107545.1-trav:0.00513877
):0.0078583
):0.00943574
):0.010258
):0.0195902
,
(
V72RF-ADFV01192039.1-trav:0.0379086
,
(
V126RF-ABGA01387831.1-trav:0.0331008
,
(
V12RF-CABD02105589.1-trav:0.0181361
,
(
(
V67RF-AJFE01069976.1-trav:-0
,
V202RF-AACZ03171512.1-trav:-0
):0.0154805
,
V77RF-AACZ03097618.1-trav:0.0154805
):0.00265555
):0.0149648
):0.00480772
):0.0143724
):0.0637175
,
(
V65RF-JZKE01143910.1-trav:0.0558541
,
(
(
V49RF-ABDC01379531.1-trav:0.0428411
,
V54RF-JZKE01143895.1-trav:0.0428411
):0.00572393
,
V58RF-JZKE01143896.1-trav:0.048565
):0.00728906
):0.0601443
):0.128642
):0.0603785
):0.0563351
):2.48803
,
(
(
(
V74RF-JZKE01143916.1-trav:0.687107
,
(
(
V145RF-AQIA01064165.1-trav:0.015642
,
V208RF-AHZZ01093949.1-trav:0.015642
):0.495838
,
V56RF-AACZ03095312.1-trav:0.51148
):0.175627
):0.488865
,
(
(
V86RF-ADFV01192042.1-trav:0.00530225
,
V23RF-CABD02105615.1-trav:0.00530225
):1.1378
,
(
(
V148RF-ADFV01192057.1-trdv:0.0259099
,
(
(
V26RF-AJFE01024273.1-trdv:-0
,
V187RF-AACZ03095321.1-trdv:-0
):0.0101422
,
V112RF-CABD02105639.1-trdv:0.0101422
):0.0157677
):0.82459
,
(
(
(
(
V59RF-ADFV01192035.1-trav:0.0158068
,
V55RF-JYKQ01054925.1-trav:0.0158068
):0.0176076
,
V151RF-ABGA01113133.1-trav:0.0334144
):0.241226
,
(
(
V91RF-AGCE01026530.1-trav:0.0288493
,
(
V67RF-ADFV01192037.1-trav:0.0253854
,
(
(
V62RF-AJFE01069975.1-trav:-0
,
V72RF-AACZ03097613.1-trav:-0
):0.01852
,
(
V130RF-AQIA01064146.1-trav:0.00519213
,
(
V191RF-JABR01098600.1-trav:-0
,
V217RF-AQIB01128644.1-trav:-0
):0.00519213
):0.0133278
):0.00686539
):0.00346396
):0.180648
,
(
(
V190RF-JABR01098600.1-trav:0.0366584
,
(
V60RF-JYKQ01054940.1-trav:0.0239873
,
(
V126RF-AQIA01064144.1-trav:0.00519213
,
V87RF-AHZZ01198216.1-trav:0.00519213
):0.0187951
):0.0126711
):0.0271108
,
(
(
V65RF-AJFE01069975.1-trav:-0
,
V75RF-AACZ03097614.1-trav:-0
):0.0649456
,
(
V8RF-CABD02105586.1-trav:0.0504734
,
(
V148RF-ABGA01083939.1-trav:0.0543824
,
(
V142RF-ABGA01083934.1-trav:0.0323768
,
(
V66RF-ADFV01192037.1-trav:0.0267414
,
V70RF-ADFV01192038.1-trav:0.0267414
):0.00563541
):0.0220055
):-0.00390898
):0.0144722
):-0.00117637
):0.145728
):0.0651431
):0.181146
,
(
(
(
V132RF-ABDC01454736.1-trav:0.0844264
,
(
V61RF-JZKE01143903.1-trav:0.0735224
,
(
(
(
V133RF-AQIA01064146.1-trav:0.00524662
,
(
V63RF-AHZZ01107545.1-trav:-0
,
V67RF-JYKQ01054942.1-trav:-0
):0.00524662
):0
,
V220RF-AQIB01128644.1-trav:0.00524662
):0.0398078
,
(
V73RF-ADFV01192039.1-trav:0.0312722
,
(
V127RF-ABGA01387833.1-trav:0.0242458
,
(
(
V68RF-AJFE01069976.1-trav:-0
,
V78RF-AACZ03097618.1-trav:-0
):0.00524662
,
V13RF-CABD02105590.1-trav:0.00524662
):0.0189992
):0.00702643
):0.0137822
):0.028468
):0.010904
):0.0776271
,
(
V75RF-JZKE01143916.1-trav:0.145102
,
(
V98RF-AGCE01026534.1-trav:0.0984021
,
(
(
(
V59RF-AJFE01069975.1-trav:0.00524662
,
V69RF-AACZ03097613.1-trav:0.00524662
):0.0121309
,
(
V145RF-ABGA01083939.1-trav:0.00790882
,
(
V63RF-ADFV01192035.1-trav:0.00524662
,
V5RF-CABD02105579.1-trav:0.00524662
):0.00266221
):0.0094687
):0.0233317
,
(
(
V123RF-AQIA01064138.1-trav:0.0159752
,
(
V213RF-AQIB01128644.1-trav:-0
,
V57RF-JYKQ01054940.1-trav:-0
):0.0159752
):0.0167109
,
V201RF-JABR01098604.1-trav:0.0326861
):0.00802311
):0.0576928
):0.0466997
):0.0169517
):0.179288
,
(
V49RF-JZKE01143890.1-trav:0.223196
,
(
V103RF-ABDC01533415.1-trav:0.11607
,
(
V87RF-AGCE01026527.1-trav:0.0478993
,
(
V77RF-ADFV01192039.1-trav:0.0393136
,
(
V122RF-ABGA01386446.1-trav:0.032365
,
(
V185RF-JABR01098598.1-trav:0.0287781
,
(
V35RF-AHZZ01098200.1-trav:0.0134156
,
(
(
V137RF-AQIA01064149.1-trav:-0
,
V71RF-JYKQ01054957.1-trav:-0
):0.00530225
,
V207RF-AQIB01128643.1-trav:0.00530225
):0.00811331
):0.0153625
):0.00358693
):0.0069486
):0.00858564
):0.0681709
):0.107126
):0.118146
):0.114444
):0.394714
):0.292607
):0.0328655
):1.74155
,
(
(
(
(
V149RF-ABGA01113129.1-trav:0.0247799
,
(
V61RF-ADFV01192035.1-trav:0.0163229
,
(
(
V56RF-AJFE01069975.1-trav:-0
,
V67RF-AACZ03097613.1-trav:-0
):0
,
V167RF-AACZ03171395.1-trav:-0
):0.0163229
):0.00845706
):0.363119
,
(
V86RF-AGCE01026527.1-trav:0.141146
,
(
V52RF-JZKE01143893.1-trav:0.130363
,
(
V76RF-ADFV01192039.1-trav:0.0548376
,
(
(
(
V71RF-AJFE01069976.1-trav:-0
,
V81RF-AACZ03097619.1-trav:-0
):0.00535908
,
(
V121RF-ABGA01386446.1-trav:-0
,
V15RF-CABD02105596.1-trav:-0
):0.00535908
):0.0284662
,
(
V184RF-JABR01098598.1-trav:0.0283851
,
(
V222RF-AQIB01128644.1-trav:0.014942
,
(
V136RF-AQIA01064148.1-trav:0.0135611
,
(
V34RF-AHZZ01098200.1-trav:0.00535908
,
V70RF-JYKQ01054953.1-trav:0.00535908
):0.00820203
):0.00138088
):0.0134431
):0.00544023
):0.0210123
):0.0755249
):0.0107836
):0.246753
):0.311594
,
(
V87RF-AJFE01010527.1-trav:0.645786
,
(
(
(
V95RF-AGCE01026531.1-trav:0.0396958
,
(
(
V59RF-JYKQ01054940.1-trav:0.00758872
,
(
(
V125RF-AQIA01064144.1-trav:-0
,
V196RF-JABR01098603.1-trav:-0
):0.00503527
,
V86RF-AHZZ01198216.1-trav:0.00503527
):0.00255345
):0.0208023
,
(
V147RF-ABGA01083939.1-trav:0.0177464
,
(
V65RF-ADFV01192037.1-trav:0.0135611
,
(
(
V61RF-AJFE01069975.1-trav:-0
,
V71RF-AACZ03097613.1-trav:-0
):0.00535908
,
V7RF-CABD02105584.1-trav:0.00535908
):0.00820203
):0.0041853
):0.0106446
):0.0113048
):0.111387
,
(
(
V69RF-ADFV01192038.1-trav:0.0316832
,
(
V74RF-AACZ03097614.1-trav:0.0134156
,
(
V64RF-AJFE01069975.1-trav:0.00530225
,
V10RF-CABD02105588.1-trav:0.00530225
):0.00811331
):0.0182677
):0.0455301
,
(
V93RF-AGCE01026530.1-trav:0.0615193
,
(
V189RF-JABR01098600.1-trav:0.0378469
,
(
V62RF-JYKQ01054942.1-trav:0.0191273
,
(
V128RF-AQIA01064146.1-trav:0.0163229
,
V59RF-AHZZ01107544.1-trav:0.0163229
):0.00280443
):0.0187196
):0.0236724
):0.015694
):0.0738693
):0.418231
,
(
(
(
V192RF-JABR01098600.1-trav:0.0228743
,
(
V131RF-AQIA01064146.1-trav:0.0132731
,
(
(
V61RF-AHZZ01107544.1-trav:-0
,
V218RF-AQIB01128644.1-trav:-0
):0.00524662
,
V65RF-JYKQ01054942.1-trav:0.00524662
):0.00802648
):0.00960124
):0.0388175
,
(
V141RF-ABGA01083932.1-trav:0.034122
,
(
V71RF-ADFV01192038.1-trav:0.0242458
,
(
V66RF-AJFE01069976.1-trav:0.00524662
,
V11RF-CABD02105589.1-trav:0.00524662
):0.0189992
):0.00987621
):0.0275698
):0.103969
,
(
V53RF-JZKE01143895.1-trav:0.0945053
,
V57RF-JZKE01143896.1-trav:0.0945053
):0.0711557
):0.403652
):0.0764726
):0.0537076
):1.26762
,
(
(
(
V62RF-JZKE01143910.1-trav:0.110236
,
(
(
V214RF-AQIB01128644.1-trav:0.0270945
,
(
(
(
V124RF-AQIA01064138.1-trav:-0
,
V85RF-AHZZ01198214.1-trav:-0
):0.010571
,
V58RF-JYKQ01054940.1-trav:0.010571
):0.00540413
,
V202RF-JABR01098604.1-trav:0.0159752
):0.0111193
):0.00749776
,
(
V64RF-ADFV01192037.1-trav:0.0210005
,
(
V6RF-CABD02105581.1-trav:0.00923993
,
(
V146RF-ABGA01083939.1-trav:0.00790882
,
(
V60RF-AJFE01069975.1-trav:0.00524662
,
V70RF-AACZ03097613.1-trav:0.00524662
):0.00266221
):0.0013311
):0.0117605
):0.0135918
):0.075644
):0.416805
,
(
(
(
V94RF-ADFV01192050.1-trav:0.0255251
,
(
V29RF-CABD02105628.1-trav:0.0177896
,
(
V224RF-ABGA01321068.1-trav:0.0135611
,
(
V117RF-AJFE01024276.1-trav:0.00535908
,
V61RF-AACZ03095319.1-trav:0.00535908
):0.00820203
):0.00422853
):0.00773545
):0.0172313
,
(
V93RF-JABR01039937.1-trav:0.0319678
,
(
V194RF-AQIB01128636.1-trav:0.0191273
,
(
(
V152RF-AQIA01064166.1-trav:-0
,
V122RF-JYKQ01135389.1-trav:-0
):0.00535908
,
V4RF-AHZZ01035404.1-trav:0.00535908
):0.0137682
):0.0128405
):0.0107886
):0.436501
,
(
(
(
V207RF-AHZZ01093946.1-trav:0.0586978
,
(
V91RF-ADFV01192045.1-trav:0.0361695
,
(
(
V115RF-AJFE01024276.1-trav:-0
,
V58RF-AACZ03095314.1-trav:-0
):0.00535908
,
V201RF-AACZ03171149.1-trav:0.00535908
):0.0308105
):0.0225283
):0.0697116
,
(
V104RF-ABDC01542818.1-trav:0.0452661
,
V37RF-JZKE01143869.1-trav:0.0452661
):0.0831434
):0.343926
,
(
(
V82RF-AGCE01026522.1-trav:0.0319889
,
V18RF-CABD02105602.1-trav:0.0319889
):0.436669
,
(
(
(
(
V73RF-AJFE01069977.1-trav:-0
,
V17RF-CABD02105602.1-trav:-0
):0.00535908
,
V83RF-AACZ03097619.1-trav:0.00535908
):0.0180186
,
(
V73RF-JYKQ01054957.1-trav:0.0191273
,
(
(
V139RF-AQIA01064151.1-trav:-0
,
V205RF-AQIB01128642.1-trav:-0
):0.00535908
,
V37RF-AHZZ01098200.1-trav:0.00535908
):0.0137682
):0.00425042
):0.317894
,
(
V200RF-JABR01098604.1-trav:0.046808
,
(
V62RF-ADFV01192035.1-trav:0.0247799
,
(
V57RF-AJFE01069975.1-trav:0.00535908
,
V68RF-AACZ03097613.1-trav:0.00535908
):0.0194208
):0.0220281
):0.294463
):0.127386
):0.00367785
):0.00692213
):0.0477834
):0.0651392
,
(
(
(
V89RF-AGCE01026529.1-trav:0.0838781
,
(
(
V74RF-ADFV01192039.1-trav:0.0298583
,
(
V69RF-AJFE01069976.1-trav:0.0159752
,
(
V79RF-AACZ03097619.1-trav:0.010571
,
V14RF-CABD02105592.1-trav:0.010571
):0.00540413
):0.0138832
):0.0170919
,
(
V128RF-ABGA01387833.1-trav:0.058557
,
(
V187RF-JABR01098599.1-trav:0.0207753
,
(
V32RF-AHZZ01098200.1-trav:0.0200895
,
(
V68RF-JYKQ01054942.1-trav:0.00790882
,
(
(
V134RF-AQIA01064146.1-trav:-0
,
V221RF-AQIB01128644.1-trav:-0
):0.00524662
,
V215RF-AQIB01128644.1-trav:0.00524662
):0.00266221
):0.0121807
):0.000685729
):0.0377817
):-0.0116067
):0.0369279
):0.112322
,
(
V53RF-ABDC01388284.1-trav:0.130772
,
(
(
V50RF-ABDC01379531.1-trav:-0
,
V93RF-ABDC01491653.1-trav:-0
):0.0791211
,
(
V55RF-JZKE01143895.1-trav:0.0359514
,
(
V59RF-JZKE01143896.1-trav:0.0161471
,
V60RF-JZKE01143902.1-trav:0.0161471
):0.0198042
):0.0431697
):0.0516505
):0.0654282
):0.30823
,
(
(
V73RF-ABDC01418428.1-trav:0.185385
,
(
V68RF-JZKE01143915.1-trav:0.151949
,
(
V92RF-AGCE01026530.1-trav:0.101225
,
(
(
V63RF-AJFE01069975.1-trav:0.00530225
,
V73RF-AACZ03097614.1-trav:0.00530225
):0.0413828
,
(
V143RF-ABGA01083937.1-trav:0.0309122
,
(
V195RF-JABR01098601.1-trav:0.0175338
,
(
(
V127RF-AQIA01064146.1-trav:0.010684
,
V58RF-AHZZ01107544.1-trav:0.010684
):0.00546317
,
V61RF-JYKQ01054942.1-trav:0.0161471
):0.00138667
):0.0133783
):0.0157729
):0.0545399
):0.050724
):0.0334362
):0.106145
,
(
(
V46RF-ABDC01377653.1-trav:0.0693477
,
V73RF-JZKE01143916.1-trav:0.0693477
):0.146899
,
(
V97RF-AGCE01026534.1-trav:0.11605
,
(
(
V3RF-CABD02105570.1-trav:0.0323647
,
(
V150RF-ABGA01113130.1-trav:0.025918
,
(
V60RF-ADFV01192035.1-trav:0.0161471
,
(
V55RF-AJFE01069975.1-trav:0.00530225
,
V66RF-AACZ03097612.1-trav:0.00530225
):0.0108449
):0.00977088
):0.0064467
):0.0151021
,
(
(
V83RF-AHZZ01198213.1-trav:0.00530225
,
V56RF-JYKQ01054933.1-trav:0.00530225
):0.0220458
,
(
V211RF-AQIB01128644.1-trav:0.0161889
,
(
V121RF-AQIA01064137.1-trav:0.010684
,
V198RF-JABR01098604.1-trav:0.010684
):0.00550491
):0.0111592
):0.0201187
):0.0685828
):0.100197
):0.0752831
):0.2129
):0.0877506
):1.26762
):0.47393
):0.746478
):1.53307
,
(
(
(
(
V0RF-JZKE01005121.1-trbv:0.15612
,
(
(
V68RF-JABR01092448.1-trbv:0.0266254
,
(
V190RF-AQIB01162321.1-trbv:0.0140273
,
(
V118RF-JYKQ01131110.1-trbv:0.00758872
,
(
V115RF-AQIA01048536.1-trbv:0.00503527
,
V129RF-AHZZ01067647.1-trbv:0.00503527
):0.00255345
):0.00643862
):0.0125981
):0.0190129
,
(
V30RF-ADFV01062084.1-trbv:0.0240078
,
(
(
V127RF-AJFE01070459.1-trbv:0.0104605
,
V49RF-AACZ03053994.1-trbv:0.0104605
):0
,
V107RF-CABD02352532.1-trbv:0.0104605
):0.0135473
):0.0216305
):0.110482
):0.263476
,
(
(
(
(
V80RF-AJFE01104359.1-trbv:-0
,
V53RF-AACZ03067000.1-trbv:-0
):0.0161471
,
V110RF-CABD02377005.1-trbv:0.0161471
):0.102843
,
(
(
V45RF-ABGA01091260.1-trbv:0.0144702
,
(
V47RF-AACZ03053992.1-trbv:0.00782629
,
(
V28RF-ADFV01062082.1-trbv:0.00519213
,
V125RF-AJFE01070459.1-trbv:0.00519213
):0.00263416
):0.00664393
):0.0323571
,
(
V113RF-AQIA01048536.1-trbv:0.0198766
,
(
V188RF-AQIB01162321.1-trbv:0.00782629
,
(
V131RF-AHZZ01067648.1-trbv:0.00519213
,
V66RF-JABR01092448.1-trbv:0.00519213
):0.00263416
):0.0120503
):0.0269508
):0.0721626
):0.320226
,
(
V153RF-AQIB01162312.1-trbv:0.306768
,
(
V133RF-ABDC01455982.1-trbv:0.167443
,
V77RF-JZKE01196378.1-trbv:0.167443
):0.139326
):0.132447
):-0.0196197
):1.50059
,
(
(
(
V41RF-ABGA01091252.1-trbv:0.0131336
,
(
(
V130RF-AJFE01070460.1-trbv:-0
,
V101RF-CABD02352526.1-trbv:-0
):0.00519213
,
V43RF-AACZ03053991.1-trbv:0.00519213
):0.0079415
):0.02347
,
(
(
V109RF-AQIA01048536.1-trbv:0.0212331
,
V141RF-AHZZ01067649.1-trbv:0.0212331
):0.00550829
,
(
V184RF-AQIB01162321.1-trbv:0.0212331
,
V112RF-JYKQ01131104.1-trbv:0.0212331
):0.00550829
):0.00986226
):0.360751
,
(
(
V189RF-AQIB01162321.1-trbv:0.0380344
,
(
V164RF-ABGA01225869.1-trbv:0.0212331
,
(
V48RF-AACZ03053994.1-trbv:0.0212741
,
(
V29RF-ADFV01062084.1-trbv:0.0104605
,
V106RF-CABD02352531.1-trbv:0.0104605
):0.0108137
):-4.09801e-05
):0.0168012
):0.308755
,
(
(
(
V44RF-ABGA01091257.1-trbv:0.0158068
,
V104RF-CABD02352529.1-trbv:0.0158068
):0.0183421
,
(
V187RF-AQIB01162321.1-trbv:0.0316883
,
(
V144RF-AHZZ01067649.1-trbv:0.0253644
,
(
V65RF-JABR01092448.1-trbv:0.01852
,
(
V112RF-AQIA01048536.1-trbv:0.00519213
,
V115RF-JYKQ01131107.1-trbv:0.00519213
):0.0133278
):0.00684438
):0.00632395
):0.00246066
):0.29587
,
(
(
V110RF-JZKE01294668.1-trbv:0.170087
,
(
(
V9RF-AGCE01061998.1-trbv:0.0868327
,
V11RF-AGCE01062000.1-trbv:0.0868327
):0.0495107
,
(
V19RF-AGCE01062009.1-trbv:0.0951417
,
(
(
(
(
V101RF-AQIA01048532.1-trbv:0.0104605
,
V133RF-AHZZ01067649.1-trbv:0.0104605
):0
,
V105RF-JYKQ01131101.1-trbv:0.0104605
):0.00805952
,
(
V144RF-JABR01088213.1-trbv:0.0158068
,
V176RF-AQIB01162320.1-trbv:0.0158068
):0.00271316
):0.0333543
,
(
V20RF-ADFV01062075.1-trbv:0.035173
,
(
V35RF-AACZ03053988.1-trbv:0.0158068
,
V94RF-CABD02352513.1-trbv:0.0158068
):0.0193662
):0.0167013
):0.0432673
):0.0412017
):0.0337437
):0.103279
,
(
(
V163RF-AJFE01070464.1-trbv:-0
,
V14RF-AACZ03053981.1-trbv:-0
):0.232782
,
(
V124RF-ABDC01368601.1-trbv:0.209858
,
(
(
(
V164RF-JABR01088216.1-trbv:0.0452436
,
(
V150RF-AQIB01162312.1-trbv:0.0239873
,
(
V75RF-AQIA01048526.1-trbv:0.0158068
,
(
V177RF-AHZZ01067656.1-trbv:0.0104605
,
V30RF-JYKQ01029809.1-trbv:0.0104605
):0.00534636
):0.00818047
):0.0212563
):0.0600303
,
(
(
(
V172RF-AHZZ01067655.1-trbv:-0
,
V33RF-JYKQ01029809.1-trbv:-0
):0.0438246
,
(
V78RF-AQIA01048526.1-trbv:0.0104605
,
V171RF-AHZZ01067655.1-trbv:0.0104605
):0.0333641
):0.0457377
,
(
(
V206RF-ABGA01277809.1-trbv:0.0359514
,
(
(
V162RF-AJFE01070464.1-trbv:-0
,
V12RF-AACZ03053977.1-trbv:-0
):0.0158068
,
V70RF-CABD02352488.1-trbv:0.0158068
):0.0201446
):0.0384637
,
(
(
V73RF-CABD02352493.1-trbv:0.035173
,
(
V164RF-AJFE01070465.1-trbv:0.00519213
,
V9RF-AACZ03053976.1-trbv:0.00519213
):0.0299809
):0.0382698
,
(
V208RF-ABGA01277810.1-trbv:0.0767411
,
(
V168RF-JABR01088216.1-trbv:0.0751283
,
(
V210RF-ABGA01277815.1-trbv:0.0629089
,
(
V207RF-ABGA01277810.1-trbv:0.0594341
,
(
V8RF-ADFV01062071.1-trbv:0.0533802
,
(
V11RF-ADFV01062071.1-trbv:0.0604128
,
(
V69RF-CABD02352482.1-trbv:0.0325062
,
(
V7RF-ADFV01062069.1-trbv:0.0212331
,
(
V36RF-AJFE01039608.1-trbv:-0
,
V7RF-AACZ03053974.1-trbv:-0
):0.0212331
):0.011273
):0.0279066
):-0.00703263
):0.00605394
):0.00347477
):0.0122194
):0.00161286
):-0.00329829
):0.000972226
):0.0151472
):0.0157117
):0.0467441
,
(
V13RF-AGCE01062002.1-trbv:0.129079
,
(
(
(
V0RF-AGCE01061995.1-trbv:0.0437792
,
V4RF-AGCE01061995.1-trbv:0.0437792
):0.0397758
,
(
(
V155RF-AJFE01070463.1-trbv:-0
,
V30RF-AACZ03053988.1-trbv:-0
):0.0639877
,
(
V161RF-AQIB01162317.1-trbv:0.0309998
,
(
V86RF-AQIA01048530.1-trbv:0.01852
,
(
V154RF-AHZZ01067652.1-trbv:0.00519213
,
V86RF-JYKQ01131090.1-trbv:0.00519213
):0.0133278
):0.0124798
):0.0329879
):0.0195673
):0.020555
,
(
(
V99RF-ABGA01301083.1-trbv:0.0477583
,
(
V147RF-AJFE01070463.1-trbv:0.0158068
,
V24RF-AACZ03053983.1-trbv:0.0158068
):0.0319515
):0.0541324
,
(
(
V93RF-JYKQ01131092.1-trbv:0.0481725
,
(
V165RF-AQIB01162318.1-trbv:0.046708
,
(
V90RF-AQIA01048530.1-trbv:0.0267414
,
V160RF-AHZZ01067652.1-trbv:0.0267414
):0.0199666
):0.00146443
):0.0464879
,
(
(
V151RF-JABR01088214.1-trbv:0.0470683
,
(
V173RF-AQIB01162320.1-trbv:0.0316832
,
(
V98RF-AQIA01048532.1-trbv:0.0302752
,
(
V151RF-AHZZ01067651.1-trbv:0.0161471
,
V101RF-JYKQ01131096.1-trbv:0.0161471
):0.014128
):0.00140807
):0.0153851
):0.0401687
,
(
(
V147RF-AHZZ01067651.1-trbv:-0
,
V96RF-JYKQ01131093.1-trbv:-0
):0.0640829
,
(
V99RF-JYKQ01131094.1-trbv:0.069025
,
(
V94RF-AQIA01048530.1-trbv:0.0793131
,
(
(
V27RF-AACZ03053987.1-trbv:0.0161471
,
V88RF-CABD02352510.1-trbv:0.0161471
):0.0544259
,
(
V101RF-ABGA01301086.1-trbv:0.0544896
,
(
V163RF-ABGA01223433.1-trbv:0.040197
,
(
V157RF-JABR01088215.1-trbv:0.0282031
,
(
V81RF-CABD02352501.1-trbv:0.01852
,
(
V144RF-AJFE01070463.1-trbv:0.0158068
,
V21RF-AACZ03053983.1-trbv:0.0158068
):0.00271316
):0.00968309
):0.0119939
):0.0142927
):0.0160834
):0.00874007
):-0.0102881
):-0.00494209
):0.0231541
):0.00742339
):0.00723029
):0.00221938
):0.0249689
):0.022939
):0.05784
):0.0229236
):0.0405841
):0.0566531
):0.0167702
):0.050566
):1.50059
):1.58471
,
(
(
(
(
V81RF-AJFE01104369.1-trbv:-0
,
V54RF-AACZ03067007.1-trbv:-0
):0.0261813
,
V111RF-CABD02377030.1-trbv:0.0261813
):0.0170558
,
(
(
V119RF-JYKQ01131111.1-trbv:0.0235659
,
(
(
V116RF-AQIA01048536.1-trbv:-0
,
V191RF-AQIB01162321.1-trbv:-0
):0.0154805
,
V77RF-JABR01196792.1-trbv:0.0154805
):0.0080854
):0.0122813
,
(
V128RF-AJFE01070459.1-trbv:0.0207916
,
V46RF-ABGA01091263.1-trbv:0.0207916
):0.0150556
):0.00738984
):2.73238
,
(
(
(
V100RF-CABD02352525.1-trbv:0.469699
,
(
(
V142RF-ABDC01560090.1-trbv:0.141058
,
(
V108RF-CABD02377004.1-trbv:0.0490951
,
V185RF-AQIB01162321.1-trbv:0.0490951
):0.0919627
):0.212495
,
(
V136RF-ABDC01473376.1-trbv:0.238443
,
(
(
V114RF-JYKQ01131105.1-trbv:0.0262833
,
(
V64RF-JABR01092448.1-trbv:0.015642
,
V186RF-AQIB01162321.1-trbv:0.015642
):0.0106413
):0.0348143
,
(
V43RF-ABGA01091257.1-trbv:0.0223721
,
(
V103RF-CABD02352526.1-trbv:0.0129971
,
(
V132RF-AJFE01070460.1-trbv:0.00513877
,
V45RF-AACZ03053992.1-trbv:0.00513877
):0.0078583
):0.00937507
):0.0387254
):0.177345
):0.11511
):0.116146
):0.258092
,
(
(
V38RF-ABGA01091249.1-trbv:0.0212331
,
V40RF-AACZ03053991.1-trbv:0.0212331
):0.626727
,
(
(
V119RF-JZKE01294690.1-trbv:0.127949
,
(
V144RF-AQIB01162311.1-trbv:0.0754211
,
(
(
(
V1RF-AGCE01061995.1-trbv:0.035173
,
(
V72RF-AQIA01048525.1-trbv:0.0158068
,
V175RF-AHZZ01067656.1-trbv:0.0158068
):0.0193662
):0.0127021
,
(
V9RF-ADFV01062071.1-trbv:0.0408957
,
(
(
(
V160RF-AJFE01070464.1-trbv:-0
,
V10RF-AACZ03053977.1-trbv:-0
):0
,
V71RF-CABD02352491.1-trbv:-0
):0.0323337
,
V205RF-ABGA01277809.1-trbv:0.0323337
):0.00856198
):0.00697933
):0.00908412
,
(
V4RF-ADFV01062069.1-trbv:0.0581602
,
(
V31RF-JYKQ01029809.1-trbv:0.0348076
,
(
V151RF-AQIB01162312.1-trbv:0.0281083
,
(
V76RF-AQIA01048526.1-trbv:0.0150156
,
V169RF-AHZZ01067655.1-trbv:0.0150156
):0.0130927
):0.00669932
):0.0233526
):-0.00120106
):0.0184619
):0.0525277
):0.197164
,
(
V120RF-JZKE01294692.1-trbv:0.137853
,
(
(
(
V77RF-AQIA01048526.1-trbv:0.0104605
,
V152RF-AQIB01162312.1-trbv:0.0104605
):0.0497481
,
(
(
V37RF-AJFE01039609.1-trbv:-0
,
V8RF-AACZ03053975.1-trbv:-0
):0.0288587
,
(
(
V161RF-AJFE01070464.1-trbv:-0
,
V11RF-AACZ03053977.1-trbv:-0
):0.00519213
,
V72RF-CABD02352492.1-trbv:0.00519213
):0.0236666
):0.0313498
):0.062032
,
(
(
V72RF-JABR01095741.1-trbv:0.0438246
,
(
V68RF-AQIA01048525.1-trbv:0.0380565
,
(
V240RF-AHZZ01107345.1-trbv:0.0212331
,
V24RF-JYKQ01029805.1-trbv:0.0212331
):0.0168233
):0.00576811
):0.0154333
,
(
(
V73RF-AQIA01048525.1-trbv:0.0171634
,
(
(
V145RF-AQIB01162312.1-trbv:-0
,
V28RF-JYKQ01029807.1-trbv:-0
):0.0131336
,
(
V176RF-AHZZ01067656.1-trbv:0.00519213
,
V148RF-AQIB01162312.1-trbv:0.00519213
):0.0079415
):0.00402976
):0.0380349
,
(
V219RF-ABGA01277831.1-trbv:0.041003
,
(
V5RF-ADFV01062069.1-trbv:0.0255269
,
(
V213RF-ABGA01277827.1-trbv:0.020379
,
(
V1RF-ADFV01062069.1-trbv:0.0205952
,
(
V34RF-AJFE01039607.1-trbv:0.0104605
,
V67RF-CABD02352480.1-trbv:0.0104605
):0.0101348
):-0.00021624
):0.0051479
):0.0154761
):0.0141953
):0.00405958
):0.0629826
):0.0156121
):0.187261
):0.322847
):0.0798311
):1.81027
,
(
(
(
V116RF-JZKE01294669.1-trbv:0.124147
,
(
V18RF-AGCE01062008.1-trbv:0.06783
,
(
(
V159RF-AJFE01070463.1-trbv:-0
,
V34RF-AACZ03053988.1-trbv:-0
):0.0104605
,
V93RF-CABD02352512.1-trbv:0.0104605
):0.0573695
):0.056317
):0.15329
,
(
(
(
V78RF-CABD02352499.1-trbv:0.01852
,
(
V201RF-ABGA01277802.1-trbv:0.0158068
,
V17RF-AACZ03053981.1-trbv:0.0158068
):0.00271316
):0.0269049
,
(
V82RF-AQIA01048528.1-trbv:0.026889
,
(
V37RF-JYKQ01029811.1-trbv:0.015977
,
(
V165RF-AHZZ01067653.1-trbv:0.010684
,
(
V153RF-JABR01088215.1-trbv:0.00519213
,
V157RF-AQIB01162313.1-trbv:0.00519213
):0.00549184
):0.005293
):0.010912
):0.0185359
):0.210315
,
(
(
V6RF-ADFV01062069.1-trbv:0.0267414
,
(
V35RF-AJFE01039607.1-trbv:-0
,
V6RF-AACZ03053974.1-trbv:-0
):0.0267414
):0.153676
,
(
(
V163RF-AQIB01162317.1-trbv:0.0848314
,
(
V16RF-ADFV01062075.1-trbv:0.0568527
,
(
V157RF-AJFE01070463.1-trbv:-0
,
V32RF-AACZ03053988.1-trbv:-0
):0.0568527
):0.0279787
):0.0534656
,
(
V152RF-JABR01088215.1-trbv:0.148622
,
(
(
V17RF-ADFV01062075.1-trbv:0.0482418
,
(
V23RF-AACZ03053983.1-trbv:0.01852
,
(
V146RF-AJFE01070463.1-trbv:0.00519213
,
V83RF-CABD02352503.1-trbv:0.00519213
):0.0133278
):0.0297218
):0.0389617
,
(
V142RF-JABR01088213.1-trbv:0.0907225
,
(
(
V93RF-AQIA01048530.1-trbv:0.010684
,
V146RF-AHZZ01067651.1-trbv:0.010684
):0.068317
,
(
(
V151RF-AJFE01070463.1-trbv:0.0323337
,
V87RF-CABD02352509.1-trbv:0.0323337
):0.0302082
,
(
(
(
V97RF-AQIA01048532.1-trbv:0.00519213
,
V150RF-AHZZ01067651.1-trbv:0.00519213
):0.0229579
,
(
(
V172RF-AQIB01162320.1-trbv:0.0104605
,
V100RF-JYKQ01131095.1-trbv:0.0104605
):0.0107727
,
V98RF-JYKQ01131094.1-trbv:0.0212331
):0.00691687
):0.0120855
,
(
V22RF-ADFV01062076.1-trbv:0.0366638
,
(
V84RF-CABD02352508.1-trbv:0.0239975
,
(
V25RF-AACZ03053984.1-trbv:0.0158268
,
(
(
V148RF-AJFE01070463.1-trbv:0.00519213
,
V100RF-ABGA01301086.1-trbv:0.00519213
):0.00528783
,
(
V154RF-AJFE01070463.1-trbv:0.00519213
,
V29RF-AACZ03053988.1-trbv:0.00519213
):0.00528783
):0.00534684
):0.00817072
):0.0126662
):0.00357178
):0.0223063
):0.0164591
):0.0117215
):-0.00351901
):0.061419
):-0.0103254
):0.0421202
):0.075323
):0.0216966
):1.25772
,
(
(
V140RF-AHZZ01067649.1-trbv:0.0404544
,
(
V25RF-ADFV01062079.1-trbv:0.0319889
,
(
(
V135RF-AJFE01070461.1-trbv:-0
,
V41RF-AACZ03053991.1-trbv:-0
):0.015642
,
V39RF-ABGA01091249.1-trbv:0.015642
):0.0163469
):0.00846549
):0.442468
,
(
(
V116RF-ABDC01281097.1-trbv:0.137324
,
(
V73RF-JABR01095742.1-trbv:0.0404544
,
(
V33RF-AJFE01039607.1-trbv:0.0103522
,
V4RF-AACZ03053974.1-trbv:0.0103522
):0.0301022
):0.0968693
):0.262303
,
(
(
V21RF-AGCE01062009.1-trbv:0.0824907
,
(
V138RF-AHZZ01067649.1-trbv:0.0655773
,
(
V39RF-AACZ03053991.1-trbv:0.0156811
,
(
V134RF-AJFE01070461.1-trbv:0.0103522
,
V98RF-CABD02352520.1-trbv:0.0103522
):0.00532895
):0.0498962
):0.0169134
):0.276719
,
(
(
(
V21RF-ADFV01062075.1-trbv:-0
,
V95RF-CABD02352514.1-trbv:-0
):0.10059
,
(
V20RF-AACZ03053983.1-trbv:0.0826496
,
(
V141RF-AJFE01070463.1-trbv:0.00513877
,
V18RF-AACZ03053981.1-trbv:0.00513877
):0.0775109
):0.0179403
):0.205272
,
(
(
V20RF-AGCE01062009.1-trbv:0.0822845
,
(
V107RF-JYKQ01131102.1-trbv:0.0498992
,
(
V34RF-ABGA01091248.1-trbv:0.0447747
,
(
V97RF-CABD02352515.1-trbv:0.00774547
,
(
(
V137RF-AJFE01070462.1-trbv:-0
,
V37RF-AACZ03053989.1-trbv:-0
):0.00513877
,
V96RF-CABD02352514.1-trbv:0.00513877
):0.0026067
):0.0370293
):0.00512442
):0.0323854
):0.196449
,
(
(
(
(
(
(
V79RF-AQIA01048527.1-trbv:-0
,
V173RF-AHZZ01067655.1-trbv:-0
):0
,
V34RF-JYKQ01029809.1-trbv:-0
):0.0319889
,
V154RF-AQIB01162312.1-trbv:0.0319889
):0.0549357
,
(
V74RF-CABD02352494.1-trbv:0.0523127
,
(
V204RF-ABGA01277808.1-trbv:0.0376037
,
V13RF-AACZ03053979.1-trbv:0.0376037
):0.0147089
):0.0346119
):0.0305421
,
(
(
V76RF-CABD02352499.1-trbv:0.0129971
,
(
V138RF-AJFE01070463.1-trbv:0.00513877
,
V15RF-AACZ03053981.1-trbv:0.00513877
):0.0078583
):0.0830382
,
(
V206RF-JABR01184607.1-trbv:0.0545469
,
(
V155RF-AQIB01162313.1-trbv:0.0323989
,
(
V35RF-JYKQ01029811.1-trbv:0.0320311
,
(
V80RF-AQIA01048527.1-trbv:0.0264584
,
V163RF-AHZZ01067653.1-trbv:0.0264584
):0.00557268
):0.000367891
):0.0221479
):0.0414884
):0.0214314
):0.0772993
,
(
(
(
V104RF-JYKQ01131101.1-trbv:0.0129971
,
(
V100RF-AQIA01048532.1-trbv:0.00513877
,
V132RF-AHZZ01067649.1-trbv:0.00513877
):0.0078583
):0.0995317
,
(
V17RF-AGCE01062008.1-trbv:0.085081
,
(
V18RF-ADFV01062075.1-trbv:0.0543479
,
(
V196RF-ABGA01259417.1-trbv:0.0390945
,
(
(
V91RF-CABD02352511.1-trbv:-0
,
V92RF-CABD02352512.1-trbv:-0
):0.0237342
,
(
V158RF-AJFE01070463.1-trbv:0.00513877
,
V33RF-AACZ03053988.1-trbv:0.00513877
):0.0185954
):0.0153603
):0.0152534
):0.0307331
):0.0274477
):0.0594656
,
(
(
(
V102RF-ABGA01301086.1-trbv:0.0404544
,
(
V156RF-AJFE01070463.1-trbv:0.00513877
,
V31RF-AACZ03053988.1-trbv:0.00513877
):0.0353156
):0.063693
,
(
(
V0RF-JABR01013263.1-trbv:0.0617574
,
(
V174RF-AQIB01162320.1-trbv:0.0265195
,
(
V102RF-JYKQ01131098.1-trbv:0.0129971
,
(
V99RF-AQIA01048532.1-trbv:0.0103522
,
V152RF-AHZZ01067651.1-trbv:0.0103522
):0.0026449
):0.0135225
):0.0352379
):0.006923
,
(
(
(
V150RF-AJFE01070463.1-trbv:0.0103522
,
V26RF-AACZ03053986.1-trbv:0.0103522
):0.0147441
,
(
V28RF-AACZ03053988.1-trbv:0.00774547
,
(
V153RF-AJFE01070463.1-trbv:0.00513877
,
V89RF-CABD02352511.1-trbv:0.00513877
):0.0026067
):0.0173508
):0.0458807
,
(
V162RF-JABR01088215.1-trbv:0.0609989
,
(
(
V92RF-AQIA01048530.1-trbv:0.0210101
,
V145RF-AHZZ01067651.1-trbv:0.0210101
):0.0281761
,
(
V91RF-AQIA01048530.1-trbv:0.0264584
,
V161RF-AHZZ01067652.1-trbv:0.0264584
):0.0227278
):0.0118127
):0.00997803
):-0.00229651
):0.0354669
):0.00598618
,
(
(
(
(
V145RF-AJFE01070463.1-trbv:-0
,
V22RF-AACZ03053983.1-trbv:-0
):0
,
V82RF-CABD02352502.1-trbv:-0
):0.0490951
,
V63RF-ABGA01129113.1-trbv:0.0490951
):0.0543315
,
(
(
V147RF-JABR01088214.1-trbv:0.0594871
,
(
V96RF-ABGA01301078.1-trbv:0.0565407
,
(
(
V95RF-AQIA01048531.1-trbv:0.015642
,
V97RF-JYKQ01131094.1-trbv:0.015642
):0.0306253
,
(
(
V87RF-AQIA01048530.1-trbv:0.0210101
,
V155RF-AHZZ01067652.1-trbv:0.0210101
):0
,
V87RF-JYKQ01131090.1-trbv:0.0210101
):0.0252572
):0.0102734
):0.00294641
):0.0315982
,
(
V15RF-ADFV01062075.1-trbv:0.0732665
,
(
V164RF-AQIB01162317.1-trbv:0.0264995
,
(
V158RF-AHZZ01067652.1-trbv:0.0210101
,
V90RF-JYKQ01131090.1-trbv:0.0210101
):0.00548942
):0.046767
):0.0178188
):0.0123413
):0.00670698
):0.0618607
):0.0227717
):0.0839672
):0.0271286
):0.0533478
):0.0404167
):0.0832957
):1.25772
):0.552542
):0.922116
):0.352919
):0.935799
):0.822088
):0.720259
):0.748599
)
;
