# Supplementary material for: Iterative Variable Gene Discovery from Whole Genome Sequencing with a Bootstrapped Multiresolution Algorithm
Source: Comput Math Methods Med. 2019 Feb 11;2019:3780245. doi: 10.1155/2019/3780245 (PMC6388353; doi:10.1155/2019/3780245)
Supplement: Supplementary Materials — supp_materialsV2.pdf: this is an updated document, which includes new figures requested by the reviewer. sequences_alignments.zip: these are genome sequence files that are relevant for reproducing some of the results. [file 3780245.f1.zip › 3780245.f1/sequences_alignments/bstrp_iteration_1_r.fasta]

>V1RF-AQIA01007574.1-iglv |(14067, 14370)|2.99798400013|(1.000,0.998,1.000)|1
-SWAQAAPTQ-PPSVSGSPGQSVTISCTGTSS---DIGGYNRVSWYQQHPGKAPKLMIYE
V---------SKRPSGVSDRFSGSK--SGNTASLT------IS-GLQAEDEADYYCSSYA
GS---
>V2RF-AQIA01007574.1-iglv |(37774, 38077)|2.98896000066|(0.997,0.994,0.998)|1
-SAASYELTQ-PPSVSVSPGQTARITCS---G---DALPKKYAYWFQQKPGQSPVLIIYE
D---------SKRPSGIPERFSGSS--SGTVATLT------IS-GAQVEDEADYYCYSTD
SSGNH
>V4RF-AQIA01007574.1-iglv |(48578, 48881)|2.98851611711|(1.000,1.000,0.989)|1
-SWAQAALTQ-PPSVSGSPGQSVTISCTGTSS---DIGGYNRVSWYQQHPGKAPKLMIYE
V---------SKRPSGVSDRFSGSK--SGNTASLT------IS-GLQAEDEADYYCSSYA
SS---
>V5RF-AQIA01007575.1-iglv |(6771, 7074)|2.99899600001|(1.000,1.000,0.999)|1
-SWAQAALTQ-PPSVSGSPGQSVTISCTGTSS---DVGGYNYVSWYQQHPGKAPKLMIYD
V---------SKRPSGVSDRFSGSK--SGNTASLT------IS-GLQAEDEADYYCSSYA
GS---
>V7RF-AQIA01007576.1-iglv |(8743, 9046)|2.98332422844|(0.999,0.986,0.999)|1
-SAVSYELTQ-PPSVSVSPGQTARITCG---G---DNLGSKYVHWYQQKPAQAPVLVIYY
D---------SDRPSGIPERFSGSK--SGNTATLT------IS-GVEAGDEADYYCQVWD
SSSDH
>V8RF-AQIA01007576.1-iglv |(19712, 20015)|3.0|(1.000,1.000,1.000)|1
-SWAQAALTQ-PRSVSGSPGQSVTISCTGTSS---DIGGYNYVSWYQQHPGTAPKLMIYE
V---------SKRPSGVSDRFSGSK--SGNTASLT------IS-GLQAEDEADYYCCSYA
GS---
>V11RF-AQIA01007576.1-iglv |(45242, 45545)|2.98799200002|(0.996,0.995,0.997)|1
-SVVSSELTQ-DPAVSVALGQTVRITCQ---G---DSLRSYYASWYQQKPGQAPVLVVYG
N---------NNRPSGIPERFSGSS--SGNTASLT------IT-GAQVEDEADYYCDSWD
SSGTH
>V13RF-AQIA01007576.1-iglv |(72187, 72490)|2.97757605748|(0.994,0.985,0.999)|1
-SATSYELTQ-PPSVSAASGQTARITCG---G---DNIGSKNVQWYQQKPAQAPVLVIYA
D---------SDRPSGIPERFSGSN--SGNTATLT------IS-GVEAGDEADYYCQVWD
SSSDH
>V14RF-AQIA01007584.1-iglv |(1279, 1588)|2.99092000218|(0.999,0.995,0.997)|1
-SWAQSVLTQ-PPSASEAARKSVTISCSGSSS---NIG-SNSVSWYQQLPGTAPKLLIYY
N---------DQRASGVSDRFSGSK--SGTSASLA------IS-GLQTEDEADYYCAAWD
DSLSG
>V16RF-AQIA01007586.1-iglv |(17179, 17489)|2.94940068997|(0.993,0.981,0.977)|1
-SLSQPVLTQ-PTSLSASPGASARLSCTLSSG---INVGSYSIYWYQQKPGSPPRYLLYY
YSD---SS--KHQGSGVPSRFSGSKDASANAGLLL------IS-GLQSEDEADYYCAI--
-----
>V17RF-AQIA01007586.1-iglv |(27894, 28201)|2.93892188321|(0.975,0.969,0.997)|1
-SWAQSVLTQ-PPSVSAVPGQKVTISCSGSSS---NIG-RSCVSWYQQVPGTAPKLLIYQ
D---------NKRPSGVSDRFSGSK--SGTSASLA------IT-GLQTGDEADYYCSAWD
SSLS-
>V18RF-AQIA01007586.1-iglv |(32056, 32365)|2.88531575157|(0.952,0.998,0.944)|1
-SWAQSVLTQ-PPSVSGDPGQRVTISCTGSSS---NIG-GYDVYWYQQLPGTAPKLLIYE
N---------NKRPSGVSDRFSGSK--SGTSASLA------IT-GLQSEDEAEYYCETWD
NSLNG
>V19RF-AQIA01007586.1-iglv |(37066, 37373)|2.98226023048|(1.000,0.987,0.996)|1
-SWAQSVLTQ-PPSVSGDPGQRVTISCTGSSS---NI-GGYYVYWYQQFPGTAPKLLIYD
N---------NKRPSGVSDRFSGSK--SGTSASLT------IT-GLQPGDEADYYCGAWD
SSLS-
>V20RF-AQIA01007586.1-iglv |(42885, 43192)|2.97394052476|(0.998,0.995,0.982)|1
-SWAQSVLTQ-PPSVSGAPGQRVTISCTGSSS---NIG-GYYVSWYQQLPGTTPKLLIYQ
D---------NKRPSGVSDRFSGSK--SGTSASLT------IT-GLQTEDEADYYCLSYD
SSLS-
>V21RF-AQIA01007587.1-iglv |(5318, 5628)|2.73559500557|(0.979,0.848,0.975)|1
-SLSQPVLTQ-PTSLSASPGASVRLTCTLRSG---ISVGGYNIHWYQQKPGSPPRYLLYY
YSD---SN--KGQGSGVPSRFSGSKDASANAGILL------IS-GFQSEDEADYYCTT--
-----
>V22RF-AQIA01007587.1-iglv |(10143, 10452)|2.99596000066|(1.000,0.997,0.999)|1
-SWAQSVLTQ-PPSASGAPGQSVTISCSGSSS---NIG-SNYVNWYQQLSGKAPKLLIYN
N---------NQRPSGVPDRFSGSK--SGTSASLA------IS-GLQSEDEADYYCAAWD
SSLSG
>V23RF-AQIA01007588.1-iglv |(1406, 1715)|2.99493200206|(1.000,0.996,0.999)|1
-SWAQSVLTQ-PPSASGAPGQSVTISCSGSSS---NIG-SNDVYWYQQFPGTAPKLLIYY
S---------NQRPSGVPDRFSGSK--SGTSASLA------IT-GLRSEDEADYYCAAWD
DSLSS
>V25RF-AQIA01007589.1-iglv |(4140, 4447)|2.99186400565|(1.000,0.997,0.995)|1
-SWAQSVLTQ-PPSVSGAPGQRVTISCTGSSS---NI-GGYYVQWYQQLPGTAPKLLIYE
N---------NKRPSGVSDRFSGSQ--SGTSASLT------IT-GLQSEDEADYYCQSYD
SSLS-
>V26RF-AQIA01007589.1-iglv |(26788, 27098)|2.92757765396|(0.988,0.959,0.984)|1
-SLSQPVLTQ-PTSLSASPGASARLTCTLSSG---ISVGSYRIFWYQQKPGSPPRYLLNY
HTD---SD--KHQGSGVPSRFSGSKDASANAGILL------IS-GLQSEDEADYYCMI--
-----
>V27RF-AQIA01007590.1-iglv |(12131, 12441)|2.97330128432|(1.000,0.980,0.995)|1
-SWAEVVFTQ-PHSVSGSPGQTVTISCTRSSG---SIG-SSYVYWYQQRPGSAPTTVIYK
D---------NQRPSGVPDRFSGSIDSSSNSASLT------IS-GLKSEDEADYYCQSYD
SSG--
>V30RF-AQIA01007600.1-iglv |(7012, 7324)|2.97330342777|(0.978,1.000,0.999)|1
-SWAEVVFTQ-PHSVSGSPGQTVTISCTRSSG---SID-SKYVQWYQQRPGSAPTTVIYK
D---------NQRPSGVPDRFSGSIDSSSNSASLA------IS-GLKSEDEADYYCQSAD
GSYN-
>V31RF-AQIA01007605.1-iglv |(38320, 38626)|2.98976801985|(1.000,0.997,0.993)|1
--DSETVVTQ-EPSLSVSPGGTVTLTCGLSSG---SVSTSNYPSWYQQTPGQAPRTLIYS
T---------NTRPSGVPDRFSGSI--LGNKAALT------IT-GAQADDESDYYCTLYM
GSGI-
>V33RF-AQIA01009600.1-iglv |(7837, 8140)|2.99696400065|(1.000,1.000,0.997)|1
-SWAQSAPTQ-PPSVSGSPGQSVTISCTGTSS---DVGGYNYVSWYQQHPGKAPKLMIYG
V---------SKRPSGVSDRFSGSK--SGNTASLT------IS-GLQAEDEADYYCCSYT
TS---
>V34RF-AQIA01009600.1-iglv |(20648, 20951)|2.78949664257|(0.985,0.977,0.875)|1
-SAASYDLTQ-PPSVSVSPGQTARITCG---G---DNIGSEVVNWYQQKPPQAPVLVIYA
D---------SERPSGIPERFSGSN--SGNTATLT------IS-GVEAGDEADYYCQVWD
ISSDH
>V35RF-AQIA01009608.1-iglv |(4448, 4751)|2.89190776217|(0.989,0.942,0.971)|1
-SWAQSALTQ-PPSVSKSLGQSVTISCTGTSS---DIGGYNGVSWYQQHSGTAPRLLIYE
V---------SKRPSGVSDRFSGSK--SGNTASLT------IS-GLQAEDEADYYCCSYR
SG---
>V36RF-AQIA01017094.1-igkv |(176237, 176552)|2.91377692984|(0.996,0.989,0.941)|1
-SSGDIVMTQTPLSLSVTPGEPASISCRSSQSLLHS-NGYTYLHWYLQKPGQSPQLLIYL
V---------SNRPSGVPDRFSGSG--SGTDFTLK------IS-RVEAEDVGVYYCEQTL
QTP--
>V37RF-AQIA01017096.1-igkv |(35522, 35822)|2.99294800078|(0.998,1.000,0.995)|1
-ARCDIQMTQSPSSLSASVGDRVTVTCRASQGIN------KELSWYQQKPGKAPTLLIYA
A---------SSLQTGVSSRFSGSG--SGTDYTLT------IS-SLQPEDVATYYCLQDY
NTP--
>V44RF-AQIA01017097.1-igkv |(69341, 69641)|2.99298400013|(0.997,0.997,0.999)|1
-ARCDIQMTQSPSSLSASVGDTVTITCRASQGIN------NELAWYQQKPGKAPTLLLYS
G---------SSLHTGVPSQFSGSG--SGTDFTLT------IS-SLQPEDVATYYCRQDY
NTP--
>V47RF-AQIA01017099.1-igkv |(19461, 19761)|2.99899600001|(1.000,1.000,0.999)|1
-ARCDIQMTQSPSALSASVGDRVTISCRASQNIY------SGLAWYQQKPGKAPKLLIYA
A---------SRLQSGIPSRFSGSG--SGTDFTLT------IS-SLQPEDSAAYYCQQVY
SNP--
>V48RF-AQIA01017100.1-igkv |(7491, 7806)|2.77658470524|(0.995,0.881,0.957)|1
-TSGDIVMTQTPLSLPVTPGEPASISCRSSQSLLHS-DGYTYLDWYLQKPGQSPQLLIYL
G---------SKRASGVPDRFSGSG--SGTDFTLK------IS-RVEAEDVGVYYCMQGT
QLP--
>V49RF-AQIA01017105.1-igkv |(1136, 1436)|2.99696400065|(1.000,0.997,1.000)|1
-ARCDIQMTQSPSSLSASVGDTVTITCRASQGIS------NDLAWYQQKPGETPKLLIYE
A---------SSLQSGIPSRFSGSG--SGTDFTLT------IS-SLQSEDFATYYCQHYY
STP--
>V50RF-AQIA01017109.1-igkv |(27445, 27743)|2.71861721881|(1.000,1.000,0.829)|1
-ARCDIQMTQSPSSLSASVGDRVTITCQASQGIS------NNLAWYQQKPGKVPKLLIYK
A---------STLQSGVPSRFSGSG--SGTDFTLT------IS-SLQPEDFATYYCQHGY
GI---
>V51RF-AQIA01017115.1-igkv |(12703, 13003)|2.93437797317|(0.999,0.950,0.995)|1
-ARCDIQMTQSPSSLSASVGDRVTITCRASENVN------NYLHWYQQKPGKAPKLLIYA
A---------STLQSGVPSRFSGSG--SGTDYTLT------IS-SLQSEDVATYYCQHSY
GTP--
>V55RF-AQIA01017115.1-igkv |(73836, 74136)|3.0|(1.000,1.000,1.000)|1
-ARCDIQMTQSPSSLSASVGDRVTITCRASQGIS------NWLAWYQQKPGKAPKLLIYR
A---------SNLETGVPSRFSGSG--SGTDFTLT------IS-SLQPEDIATYYCQQHD
NSP--
>V57RF-AQIA01017139.1-igkv |(30471, 30771)|2.82142557224|(0.917,0.983,0.941)|1
-TTGQVILTQSPATLSLSPGERATLSCRASQSVS------SYLAWYQQKPGQAPRLLIHS
A---------SSRATGIPDRFSGSG--SGTEFTLT------IS-SLEPEDVGVYHCYQYY
SGY--
>V59RF-AQIA01017140.1-igkv |(859, 1159)|2.97897252412|(0.999,0.998,0.983)|1
-AKCDIQMTQSPTFLSASVGDRVTIACRASQSIN------KGLAWYQQKPGKAPKLLISY
A---------SNLYTDVPSRFSGSG--SGTDFTLT------IS-SLQPEDAATYYCFQYN
SYP--
>V61RF-AQIA01017150.1-igkv |(11178, 11496)|2.95954053568|(0.996,0.982,0.983)|1
-ACGDIVMTQSPDSLAVSLGERVTINCKSSQSLLYSSNNKNYLAWYQQKPGQAPKLLIYW
A---------STRESGVPNRFSGSG--SGTDFTLT------IS-GLQAEDVAVYYCQQYY
STP--
>V63RF-AQIA01046502.1-trgv |(44235, 44548)|2.98851611711|(1.000,1.000,0.989)|1
-SQKSSNLEGRTKSVTRPTGSSAEITCDLPEV-----SS-FYIHWYLHQEGKAPQRLLYY
DSS---NSRVVLESGISPGKYDTYGST-RSNLRLI------LR-NLIENDSGVYYCANWD
-----
>V64RF-AQIA01046502.1-trgv |(48629, 48942)|2.94542595418|(0.999,0.971,0.980)|1
-GQKSSNLEGITKSVTRPTGSSAEITCDFSGD-----SN-FYIHWYLHQEGKVPQRLLYY
DVS---NSRDVLESGLSPGKYYTHTR-TRWSWILI------LR-NLIENDSGVYYCANWD
-----
>V65RF-AQIA01046502.1-trgv |(58146, 58459)|2.86468262014|(0.989,0.951,0.940)|1
-SQKSSNLEGRTKSVTRPTGSSAEITCDLPEV-----SS-FYIHWYLHQVGKAPQRLLYY
DTS---NSRVVLESGISPGKYDSYGST-RNNLRLR------LR-NLIENDSGVYYCANWD
-----
>V68RF-AQIA01048525.1-trbv |(48020, 48317)|2.93564403777|(0.983,0.975,0.978)|1
--PIDSGVTQTPKHLVMGMTNKKSLKCEQHMG-------HRAVYWYKQKVKKPPEIMFMY
NYE---KL--SINES-VPSRFSPECSQ-SSLFYLH------LR-ALQPEDSALYLCASSQ
-----
>V72RF-AQIA01048525.1-trbv |(78854, 79151)|2.96584034555|(0.997,0.986,0.984)|1
--PLDTAVFQTPKYLVTQMGKKESLKCEQNLG-------HDTMYWYKQDSKKLLKIMFIY
SNK---EP--ILNET-VPNRFSPESLD-KAHLNLH------IK-SVELGDSAVYFCASSQ
-----
>V73RF-AQIA01048525.1-trbv |(83218, 83515)|2.88022600405|(0.988,0.923,0.986)|1
--PTDTGVTQTPKHLVMEMTNKKSLKCEQHMG-------HNAMYWYKQKAKKPPELMFVY
QYE---KL--SINES-VPSRFSPECSK-SSLLYLH------LR-ALQPEDSALYLCASSQ
-----
>V75RF-AQIA01048526.1-trbv |(5857, 6154)|2.99298400013|(0.997,0.999,0.997)|1
--PANADVTQSPKFQILKTGQSMTLQCAQDMN-------HNSMYWYRQDPGMGLRLIHYS
ATE---DT--TDPGE-VPDGYSVSRLN-KKEFLLR------LE-SAALSQTSVYFCASSE
-----
>V76RF-AQIA01048526.1-trbv |(20529, 20842)|2.60220802314|(0.908,0.948,0.799)|1
--SLDTAVSQTPKYLVRQTGKNESLKCEQNLG-------HNAMYWYKQDSKKLLKIMFIY
NNK---EP--ILNET-VPYRFSPKSPD-KAHLNLH------IK-SLELGDSAVYFCASSQ
DTALQ
>V77RF-AQIA01048526.1-trbv |(23960, 24257)|2.62929316693|(0.941,0.965,0.801)|1
--PMETGVTQTPRHLVMGMTNKKSLKCEQHLG-------HNAMYWYKQKAKKPPELMFIY
NFK---ER--AENNS-VPSRFSPECPD-SSHLHLH------LR-ALQPEDSALYLCASSQ
-----
>V78RF-AQIA01048526.1-trbv |(35703, 36000)|2.98021230726|(0.998,0.999,0.984)|1
--PVNAGVTQTPKFQVLKTGQNMTLKCAQDMN-------HDRMYWYRQDPGMGLRLIHYS
AGE---GS--TEKGE-VPNGYNASRLN-KKDFLLR------LE-SAAPSQTSMYFCASSE
-----
>V79RF-AQIA01048527.1-trbv |(3129, 3429)|2.98696000066|(0.995,0.994,0.998)|1
--HTGAGVSQSPRNKVTEEGKDVVLRCDPISG-------HTALYWYRQSLGKGLEFLIYF
QGN---DA--PDKSGLPSGRFSAERTE-GSVSTLK------IQ-RTEQGDSAVYLCASSL
-----
>V80RF-AQIA01048527.1-trbv |(25700, 26000)|2.92504466822|(0.992,0.985,0.954)|1
--HTGAGVSQSPSNKVTEKGKDVELRCDPISG-------HAVLYWYRQNLGQGLEFLIYF
QGT---GA--VDDSGLRSDRVSATRPE-GSVSTLK------IQ-HTEQGDSAMYFCASSL
-----
>V82RF-AQIA01048528.1-trbv |(7069, 7365)|2.92257375156|(0.991,0.973,0.963)|1
--SVDCGVTQTPKHLITAIGQQVTLRCSPRSG-------DRSVYWYQQSLGQGLQFLIQY
YNG---EE--RAKG-NILERFSAQQFA-DLHSELN------LS-SLELGDSALYFCASSE
-----
>V86RF-AQIA01048530.1-trbv |(44934, 45231)|2.98759608|(0.999,1.000,0.989)|1
--PVNAGVTQTPKFQVLKTGQSMTLQCAQDMN-------HDYMYWYRQDPGMGLRLIHYS
VGE---GS--TEKGE-VPDGYNVTRSN-TEDFPLR------LE-SAAPSQTSVYFCASSD
-----
>V87RF-AQIA01048530.1-trbv |(49166, 49466)|2.93493271661|(0.996,0.951,0.996)|1
--HTGAGVSQSPRYKVTKRGQDVALRCDPISG-------HDYLYWYQQALGQGPAFLTYF
QDD---AQ--RDKSGLPNDRFSAERTE-GSVSTLK------IQ-RTEQGDSAVYLCASSL
-----
>V90RF-AQIA01048530.1-trbv |(82295, 82592)|2.96953608204|(0.988,0.998,0.984)|1
--LVNVGVTQTPKFQVLKTGQSMTVQCAQDMN-------HNFMYWYRQDPGMGLRLIHYS
GAA---GT--TDKGE-VPSGYNVSRLN-TEDFPLR------LE-SADPSQTSVYICASSY
-----
>V91RF-AQIA01048530.1-trbv |(86912, 87212)|2.95610798542|(0.999,0.964,0.998)|1
--HTVARVSQSPRYKVTKRGQDVALRCDPISG-------HATLYWYQQALGQGPELLTYF
SYE---AQ--QDKSGLPSDRFSAERPE-GSVSTLK------IQ-RTQQGDSAVYLCASSL
-----
>V92RF-AQIA01048530.1-trbv |(109105, 109405)|2.96758870068|(0.998,0.990,0.981)|1
--HTGAGVSQSPRYKVTERGQDVALRCDPISG-------HDYLYWYQQALGQGPELLTYF
NYK---AQ--PDKSGLPNDRFSAERPE-GSVSTLK------IQ-RTEQRDSAVYLCASSL
-----
>V93RF-AQIA01048530.1-trbv |(114175, 114471)|2.92769465218|(0.985,0.984,0.961)|1
--PVDAGVTQSPTHLIKTRGQQVTLRCSPISG-------HTSVSWYQQALGQGPQLIFEY
DRK---EE--RVRG-NFPDRFSGRQFP-NYSSELN------VN-ASEMGDSALYLCASSL
-----
>V94RF-AQIA01048530.1-trbv |(120217, 120514)|2.85823455755|(0.940,0.944,0.981)|1
--PGNAGVNQTPKFQVLKTGQSMTLQCAQDMN-------HECMSWYRQDPGMGLRLIHYS
VGA---GI--TDKGE-VPNGYNVSRSN-TEDFPLR------LE-SAASSQTSVYFCGSSD
-----
>V95RF-AQIA01048531.1-trbv |(13036, 13336)|2.94660443651|(0.997,0.957,0.999)|1
--HTGAGVSQFPRYRVTKRGQDVTLRCDPISG-------HEYLYWYQQAPGQGPEFLTYF
QND---AQ--PDKSGLPNDRFSAERTE-GSVSTLK------IQ-RTEQGDSAVYLCASSL
-----
>V97RF-AQIA01048532.1-trbv |(3516, 3812)|2.99389600501|(1.000,0.999,0.995)|1
--PVDAGVTQSPTHLIKTRGQQVTLRCSPISG-------HTSVYWYQQALGQGPQFIFQY
YEK---EE--RERG-NFPDRFSGHQFP-NYSSELN------VS-ALLLGDSALYLCASSL
-----
>V98RF-AQIA01048532.1-trbv |(10804, 11101)|2.93794543819|(0.960,0.997,0.990)|1
--PVNAGVTQTPKFQVLKTGQSMIVQCAQDMK-------HDYMFWYRQDPGMGLRLIYYS
VTA---GI--TTKGE-VPNGYNVSRKN-TEDFLLR------LE-SADPSQTSVYICASSE
-----
>V99RF-AQIA01048532.1-trbv |(15109, 15409)|2.9899000027|(0.997,1.000,0.993)|1
--HTGAGVSQSPRYKVIKKGQDVALRCDPISG-------HAALYWYQQALGQGPEFLTYF
NYK---AQ--PDKSGLPNDRFSAERPE-GSVSTLT------IQ-RTEQQDSAVYLCASSL
-----
>V100RF-AQIA01048532.1-trbv |(34644, 34944)|2.96802032645|(0.992,0.978,0.999)|1
--HADAGVSQDPRHKITKTGQNVSFKCVPISE-------HNRLYWYRQTLGQGPEFLTYF
QNE---AQ--QDRSGLFSDRFSAERPE-GSISTLM------IQ-HTEQGDSAVYLCASSL
-----
>V101RF-AQIA01048532.1-trbv |(48704, 49001)|2.9939280013|(0.996,0.999,0.999)|1
--HMDAGITQSPRHKITETGTPVTLRCHQTEN-------HRYMYWYRQDLGNGLRLIHYS
YGV---ED--TDKVE-VSDGYSVSRSK-TEDFLLT------LE-SAPRSQTSVYFCASSE
-----
>V109RF-AQIA01048536.1-trbv |(15427, 15724)|2.97685201038|(0.994,0.988,0.995)|1
--TMDGRITQSPKYLFRKEGQNVTLSCEQNLN-------HDAMYWYRQDPGQGLRLIYYS
QIV---ND--IQKGD-IAEGYSVSRER-KESFPLT------VT-SAQRNPTAFYLCASSI
-----
>V112RF-AQIA01048536.1-trbv |(54577, 54875)|2.93242949373|(0.988,0.998,0.952)|1
--SMDADVTQTPRNKIAKTGKRIMLECSQTKG-------HDQMYWYRQDPGLGLRLIYYS
FDV---QD--INKGE-ISNGYSVSRQE-QAKFSLS------LE-SATPNQTALYFCATSD
-----
>V113RF-AQIA01048536.1-trbv |(62410, 62707)|2.91082941374|(0.984,0.984,0.948)|1
--LTEADIYQNPRHRVIGTGKKITLECSQTVG-------HDKMYWYQQDPGMELHLIHYS
YGV---NS--TERGD-FSSESTVSRLR-IEHFPLT------LE-SASPSHTSQYLCASSE
-----
>V115RF-AQIA01048536.1-trbv |(108616, 108923)|2.98074003277|(0.996,0.997,0.988)|1
--LVDVKVTQSSRYLIKRTGEKVFLECVQDMD-------HERMFWYRQDPGLGLRLIYFS
YDV---KL--NEKGD-IPEGYSVSREK-KERFSLI------LG-SASTNQTSMYLCASSL
STA--
>V116RF-AQIA01048536.1-trbv |(128401, 128704)|2.98232022844|(0.999,0.986,0.998)|1
-SVFSAVVSQKPSRDVCQRGTSVTIQCQVDSQ-------VTMMFWYRQQPGQSMTLIATA
NQG--SEA--TYESGFVIDKFPISRPN-LTFSTLT------VS-NTSPEDSSIYLCSVE-
-----
>V118RF-AQIA01058133.1-igkv |(2029, 2329)|2.99696400065|(1.000,0.997,1.000)|1
-ARCDIQMTQSPSSLSASVGDTVTITCRASQGIS------NDLAWYQQKPGETPKLLIYE
A---------SSLQSGIPSRFSGSG--SGTDFTLT------IS-SLQSEDFATYYCQHYY
STP--
>V121RF-AQIA01064137.1-trav |(37156, 37446)|2.98171202074|(0.994,1.000,0.988)|1
-MSRGEDVEQSL-FLSVREGDISVINCTYTDS-----SS-TYLYWYKQEPGAGLQLLTYI
LSN---TD--LK----QDQRLTVLLNKKDKHLSLC------IA-DTQTEDSAIYFCAES-
-----
>V123RF-AQIA01064138.1-trav |(6177, 6471)|2.97409640489|(0.997,0.996,0.982)|1
-GINGDSVVQTEGQVLLSEGDSLIVNCSYEST-----QY-PSLFWYVQYPGEGLQLLLKA
MKF---ND---K---ESNKGFEATYRKETTSFHLE------KD-SVQESDSAVYFCALS-
-----
>V124RF-AQIA01064138.1-trav |(19410, 19703)|2.99799600001|(0.999,0.999,1.000)|1
-GSGKNQVEQSPQSLIILEGKNCTLQCNYTVS-----PF-SNLRWYKQDTGKGPISLTIM
TFS---EN--TK----SNGRYTATLDADTKQSSLH------IT-AAQLSDSASYICVVS-
-----
>V125RF-AQIA01064144.1-trav |(2574, 2880)|2.98061205453|(0.998,0.994,0.989)|1
VWSQQKEVEQDPGPFSVPEGATVTFNCTYSNS-----AS-QSFFWYRQDSRKEPKLLMSV
YSS---G---N-----EDGRFTAQLNRASQYISLL------IR-DSQLSDSATYLCAVRT
QCSP-
>V126RF-AQIA01064144.1-trav |(8015, 8312)|2.71827160044|(0.991,0.847,0.963)|1
-GTRAQSVTQLDSQVSVSEGVPVLLRCNYSSS-----FS-PYLFWYVQYPNQGLQLLLKY
TSG---TT--LV---KGINGFEAEFKKSETSFHLT------KA-SAHVSDAAEYFCAVN-
-----
>V127RF-AQIA01064146.1-trav |(4210, 4500)|2.98578801933|(0.997,0.999,0.990)|1
--VNGENVEQHPSTLSVQEGDSSVIKCTYSDS-----AS-NYFPWYKQELGKGPQFIIDI
RSN---AH--EK----KNQRITVLLNKTAKHFSLH------IT-ETQPGDSAVYFCAAS-
-----
>V128RF-AQIA01064146.1-trav |(26731, 27019)|2.98270803341|(0.998,0.990,0.995)|1
VWS-QQKVEQNSGPLNVPEGAIASLNCTYSDS-----GS-QSFFWYRQYSGQSPELLMST
YSS---GD--K-----EDGRFTAQLDRASQYVSLL------IR-DSQLSDSATYLCAV--
-----
>V130RF-AQIA01064146.1-trav |(38786, 39083)|2.93996483513|(0.996,0.997,0.954)|1
-TARAQSVTQPDIHITVSEGASLELRCNYSYG-----AT-PSLFWYVQSPGQGLQLLLKY
FSG---DT--VV---QGIKGFEAEFKRSQYSFNLR------KP-SVHWSDAAEYFCAAG-
-----
>V131RF-AQIA01064146.1-trav |(52629, 52922)|2.91423800393|(0.999,0.998,0.934)|1
-VSRGESVGLHLPTVTVQEGDNSVINCTYSDS-----AS-DYFLWYKQESGKGPQSIMDI
RSN---MA--KR----QGQRLTVLLNKTMKHLSLQ------IA-ATEPGDSAVYFCAEN-
-----
>V132RF-AQIA01064146.1-trav |(58513, 58814)|2.94950546622|(1.000,0.991,0.964)|1
-SGIAQKITQTQPAMFVQEKEAVTLDCTYDTS-----DQNYGLFWYKQPSSGEMIFLILQ
MSY---DK--QN---ATEGRYSLNFQKARKSVNLV------IS-ASQVGDSATYFCAMR-
-----
>V133RF-AQIA01064146.1-trav |(76833, 77127)|2.98742416586|(1.000,1.000,0.988)|1
-RTRGDSVTQMEGPVTLSERAFLTINCTYTAT-----GY-PSLFWYVQYPGEGPQLLLKA
AKT---DE---K---GSNKGFEATYRKETTSFHLK------KD-SVQESDSAVYFCALS-
-----
>V134RF-AQIA01064146.1-trav |(101455, 101748)|3.0|(1.000,1.000,1.000)|1
VWSQQKEVEQNPGPLSVPEGATASLNCTYSNS-----AF-QYFMWYRQYSRKGPQLLIYI
YSS---GN--K-----EDGRFTAQVDKSSKYISLF------IR-DSQPSDSATYFCAMS-
-----
>V136RF-AQIA01064148.1-trav |(10272, 10559)|2.99596000066|(1.000,0.999,0.997)|1
--VNSQQGEEDPQALSIQEGENATMNCSYKTS------I-NNLQWYRQDSGRSLVQLVLI
RSN---ER--EK----NSGRLRVTLDTSKKSSSLL------IT-ASRAADTASYFCATD-
-----
>V137RF-AQIA01064149.1-trav |(7521, 7812)|2.95226014987|(0.978,0.989,0.986)|1
-RTNGDSVTQTEGPVTLPERAALTLNCTYQTS-----YS-AFIFWYVQYPNKEPELLLKS
S-E---NQ---E---TNSRGFQASHVKSDSSFHLE------KP-SVQLSDSAVYYCVLR-
-----
>V138RF-AQIA01064149.1-trav |(10740, 11043)|2.91184034555|(0.979,0.968,0.966)|1
-SSMAQKVTQAQTEISVVEKEDVTLDCVYETR-----DTTYYLFWYKQPPSGELVFLVRQ
NSF---DE--QN---EINGRYYSNFQKSTSSFNLT------IT-ASQVVDSAVYFCALNE
-----
>V139RF-AQIA01064151.1-trav |(18011, 18298)|2.94701938908|(0.996,0.990,0.965)|1
-LSGEDQVTQSPEALSLQEGESSSLNCSYTVS-----GL-RGLFWYRQDPGKGPEFLFSL
YSA---GE--EK----EKERLKATLTKKE--SFLH------IT-GPKPEDSATYLCAVQ-
-----
>V145RF-AQIA01064165.1-trav |(18360, 18659)|2.85167212368|(0.974,0.959,0.928)|1
--VNGQQIMQIPQYQHVQEGEDFTTYCNSSTT------L-SNIQWYKQRPGGHPVFLIML
VKS---GE--VK----KQKRLTFQSGEAKKNSSLH------IT-ATQTTDVGTYFCAGHS
APQ--
>V150RF-AQIA01064166.1-trdv |(135908, 136209)|2.85823455755|(0.970,0.966,0.929)|1
-SGMAQTVTQSQQEMSVQEAETVILSCTYDTS-----ESNYYLFWYKQPPSRQMILIIRQ
EAY---KQ--QN---ATENRFSVNFQKAAKSFSLK------IS-DSQLGDAAMYFCAFM-
-----
>V151RF-AQIA01064166.1-trav |(145402, 145702)|2.9659815877|(0.999,0.978,0.991)|1
-SGMAQTVTQSQPEMSVQEAETVTLSCTYDTS-----DSDYYLFWYKQPPSRQMILIIRQ
EAY---KQ--QN---ATENRFSVNFQKATKSFSLK------IS-DSQLGDAAMYFCAYR-
-----
>V152RF-AQIA01064166.1-trav |(168980, 169268)|2.99496000066|(0.999,1.000,0.996)|1
-LSGELKVGQNPLFLSTQEGKNYTIYCNYSTA-----S--DRLYWYRQDPGKSLESLFVL
LSN---GA--VK----QEGRLMASLDTKARLSSLH------IT-AALQDLSATYFCAV--
-----
>V154RF-AQIA01075814.1-ighv |(1456, 1765)|2.99698000014|(1.000,0.999,0.998)|1
-VLSQVQLQE-SGPGLVKPSETLSLTCAVSGGS-I--SG-YYWNWIRQPPGKGLEWIGYI
GGS--SGS--TYYNPSLKSRVTISTDTSKNQFSLK------LS-SVTAADTAVYYCAR--
-----
>V156RF-AQIA01075814.1-ighv |(41318, 41631)|2.99593600205|(1.000,0.996,1.000)|1
-VQCEVQLVE-SGGGLVQPGGSLRLSCAASGFT-F---GDYGMSWVRQAPGKGLEWVGRI
RNKANSYT--TEYAASVKGRFTISRDDSKNTLYLQ------MS-SLKTEDTAVYYCT---
-----
>V157RF-AQIA01075814.1-ighv |(48089, 48398)|2.99899600001|(1.000,1.000,0.999)|1
-VQCEVQLVE-SGGGLVQPGGSLRLSCAASGFT-F---SSYDMSWVRQAPGKGLEWVSFI
SNT--GKT--IYYADSVKGRFTISRDNAKNSLSLQ------MS-SLRAEDTAVYYCTR--
-----
>V159RF-AQIA01075820.1-ighv |(24543, 24849)|2.90586276126|(0.972,0.949,0.988)|1
-VQCVEQLVE-SGGGLVQPGASLRLSCAASEFT-F---SSYDMHWVRQAPGKGLEWVSAI
SI---GGG--TYYPDSVKGRFTISRDNAKNSLYLQ------MN-SLRAEDTAVYYCAR--
-----
>V161RF-AQIA01075823.1-ighv |(9677, 9986)|2.99396800026|(0.998,0.996,1.000)|1
-VQCEVQLVE-SGGGLAKPGGSLRLSCAASGFS-F---SDYYMYWVRQAPGKGLEWVSGI
SY--TGGS--TYYADSVKGRFTISRENAKNTLYLQ------MD-SLRAEDTAVYYCAR--
-----
>V162RF-AQIA01075825.1-ighv |(15487, 15796)|3.0|(1.000,1.000,1.000)|1
-VQCEVQLVE-SGGGLVQPGGSLRLSCAASGFT-F---SSYWMYWVRQAPGKGLEWVSRI
SS--DGSS--TSYADSVKGRFTISRENAKNSLYLQ------MN-SLRAEDTAVYYCAK--
-----
>V163RF-AQIA01075825.1-ighv |(23332, 23647)|2.99798400013|(1.000,1.000,0.998)|1
-VQCEVQLVE-SGGGLVQPGGSLRLSCAASGFT-F---SSSAMHWVRQASGKGLEWVGRI
RSKSNNYE--TGYAASVKGRFTISRDDSKNTAYLQ------MN-SLKTEDTAVYYCTT--
-----
>V164RF-AQIA01075826.1-ighv |(7442, 7757)|2.99598000014|(0.999,0.997,1.000)|1
-VQCEVQLVE-SGGGLVQPGGSLRLSCAASGFT-F---SDYYMSWVRQAPGKGPEWVGFI
RNKANGGT--AEYAASVKGRFTISRDDSKSIASLQ------MN-SLKTEDTAVYYCAR--
-----
>V165RF-AQIA01075827.1-ighv |(12747, 13054)|2.98357605748|(0.990,0.995,0.999)|1
-VQCEVQLAE-SGGGLVQPGGSLRLSCAASGFT-F---SSYEMHWVRQAPGKGLESVSVI
GG--DSSY--THYADSVKGRFTISRDNAKNSLSLQ------MN-SLRAEDTAVYYCA---
-----
>V167RF-AQIA01075832.1-ighv |(13782, 14094)|3.0|(1.000,1.000,1.000)|1
-VLSQVQLQE-SGPGLVKPSETLSLTCAVSGGS-IS-SG-YYWSWIRQPPGKGLEWIGYI
YGS--SGS--TYYNPSLKSRVTISKDTSKNQFSLK------LS-SVTAADTAVYYCAR--
-----
>V168RF-AQIA01075832.1-ighv |(26831, 27140)|3.0|(1.000,1.000,1.000)|1
-VQCEVQLVE-SGGGLAKPGGSLRLSCAASGFT-F---SSYWMYWVRQAPGKGLEWISAI
SS--GGGS--TYYADSVKGRFTISRDNSKNTLSLQ------MN-SLRAEDTAVYYCAK--
-----
>V169RF-AQIA01075832.1-ighv |(39067, 39376)|2.99599200002|(0.998,0.999,0.999)|1
-VQCDVQLVE-SGGGLVKPGGSLRLSCVASGFT-F---SSYVMHWVRQAPGKGLEWVSVI
SE--SGGT--IYYADSVKGRFTISRDNAKNSLFLQ------MN-SLRAEDTAVYYCTR--
-----
>V171RF-AQIA01075834.1-ighv |(701, 1011)|2.81781062361|(0.996,0.998,0.878)|1
-VLSQVQLQE-SGPGLVKPSETLSLTCAVSGGS-IS--SSNWWSWIRQSPGKGLEWIGGI
YGS--GGS--TEYNPSLKSRVTISIDTSKNQFSLK------LS-SVTAADTAVYYCA---
-----
>V172RF-AQIA01075834.1-ighv |(15808, 16117)|3.0|(1.000,1.000,1.000)|1
-VLSQVQLQE-SGPGLVKPSETLSLTCAVSGGS-I---SGYYWSWIRQSPGKGLEWIGYI
YGS--GSS--TNYNPSLKSRVTISKDTSKNQFSLK------LS-SVTAADTAVYYCAR--
-----
>V173RF-AQIA01075844.1-ighv |(4662, 4971)|2.98450011724|(0.998,1.000,0.987)|1
-VLSQVQLQE-SGPGLVKPSETLSLTCAVSGGS-I---SSNYWSWIRQPPGKGLEWIGNI
DGN--TAD--TNYNPSLKSRVTISKDTSKNQFSLK------LS-SVTAADTAVYYCAR--
-----
>V176RF-AQIA01075855.1-ighv |(3762, 4071)|2.96392188321|(0.994,1.000,0.972)|1
-VLSQVQLQE-SGPGLVKPSETLSLTCAVSGGS-I---SSNYWSWIRQPPGKGLEWIGYI
YGS--GSS--TNYNPSLKSRVTLSVDTSKNQLSLK------LS-SVTAADTAVYYCAR--
-----
>V177RF-AQIA01075856.1-ighv |(13880, 14195)|2.95809598554|(1.000,0.965,0.998)|1
-VLSQVQLQE-SGPGLVKPSETLSLTCAVSGGS-IS-GGYYYWSWIRQPPGKGLEWIGNI
YGN--SAS--TYYNPSLKSRVTISKDTSKNQFSLK------LS-SVTAADTAVYYCAR--
-----
>V178RF-AQIA01075857.1-ighv |(5233, 5548)|2.82161612351|(0.999,0.882,0.994)|1
-VLSQVQLQE-SGPGVVKPSETLSLTCAVSGGS-IS-SGYYYWSWIRQPPGKGLEWIGGI
YSN--SES--TNYNPSLKSRVTISKDTSKNQFSLK------LS-SVTAADTAVYYCAR--
-----
>V179RF-AQIA01075859.1-ighv |(15555, 15867)|3.0|(1.000,1.000,1.000)|1
-VLSQVQLQE-SGPGLVKPSETLSLTCAVSGGS-IS-D-SYWWSWIRQPPGKGLEWIGYI
YGS--STS--TNYNPSLKSRVTISKDTSKNQFSLK------LS-SVTAADTAVYYCAR--
-----
>V180RF-AQIA01075860.1-ighv |(3491, 3803)|2.99799200002|(1.000,0.999,0.999)|1
-VLSQVQLQE-SGPGLVKPSETLSLTCAVSGGS-IS--SSNWWSWIRQPPGKGLEWIGNI
GGS--SGS--TYYNPSLKSRVTISKDTSKNQFSLK------LS-SVTAADTAVYYCAR--
-----
>V181RF-AQIA01075862.1-ighv |(11827, 12136)|2.99899600001|(1.000,0.999,1.000)|1
-VQCEVQLVE-SGGGLAKPGGSLRLSCAASGFT-F---SDYYMHWVRQASGKGLEWVSSI
SN--GGGS--TWYADSVKGRFTISRENAKNTLYLQ------MD-GLRAEDTAVYYCAR--
-----
>V183RF-AQIA01075862.1-ighv |(23165, 23477)|2.85860549808|(0.935,0.999,0.941)|1
-VLSQVQLQE-SGPGLVKPSETLSLTCAVSGGS-IS--SSNWWSWIRQPPGKGLEWIGRI
SGS--GGS--TSYNPSLKSRVTISKDTSKNQFSLK------LS-SVTAADTAVYYCAR--
-----
>V187RF-AQIA01075865.1-ighv |(14324, 14639)|3.0|(1.000,1.000,1.000)|1
-VQCEVQLVE-SGGALAQPGGSLRLSCAASGFT-F---SDYYMDWVHQAPGKGLEWVGRI
RNKANSYT--TEYAASVKGRFTISRDDSKNTLYLQ------MS-SLKTEDTAVYYCAR--
-----
>V189RF-AQIA01075867.1-ighv |(22147, 22453)|2.85568718425|(0.936,0.938,0.996)|1
-VQCEVQLVE-SGGGLVQPGGSLRLSCGF---T-F---SDHYMSWVRQAPGKGPEWVGFM
RNKANGGT--TEYATSVKGRFTISRGDSKSIASLQ------MS-SLKTEDTAVYYCAR--
-----
>V190RF-AQIA01075868.1-ighv |(2740, 3049)|2.99396800026|(0.998,0.996,1.000)|1
-VQCEVKLVE-SGGGLVQPGGSLRLSCAASGFT-F---SNYWMFWVRQAPGKGLEWVSSI
S-G-SSSS--TYYPDSVKGRFTISRDNAKNTLYLQ------MN-SLRAEDTAVYYCAR--
-----
>V193RF-AQIA01007908.1-igkv |(8863, 9163)|2.99593600205|(1.000,1.000,0.996)|-1
-ARCDIQMTQSPSSQSASVGDRVTITCQASQSLS------NYLNWYQQKPGKIPKLLIYR
A---------SSLQSGIPSRFSGSG--SGTDFTLT------IS-SLQPEDFATYYCQQGY
SYP--
>V196RF-AQIA01017118.1-igkv |(14570, 14870)|3.0|(1.000,1.000,1.000)|-1
-ARCDIQMTQSPSSLSASVGDRVTITCRASQGIN------NYLSWYQQKPGKAPKPLIYY
A---------SSLETGVPSRFSGSG--SGTDYTLT------IS-SLQPEDIATYYCQQYN
NSP--
>V197RF-AQIA01017118.1-igkv |(20337, 20639)|2.75990155173|(0.954,0.909,0.912)|-1
-SSGDVVMTQSPLSLPITPGQPASISCRSSQSLVHS-DGKTYLNWLQQKPGQPPRRLIYQ
V---------SNRDSGVPDRFSGSG--AGTDFTLK------IS-RVEAEDVGVYYCMQG-
-----
>V203RF-AQIA01017118.1-igkv |(131697, 131995)|2.84985426687|(0.999,0.894,1.000)|-1
-SKGEIVLTQSPAFQSVTLKEKVTITCQASQSIG------SSLHWYQQKPDQSPKLLIKY
A---------SQSISGVPSRFSGSG--SGTDFTLT------IN-SLEAEDAATYYCQQSS
SF---
>V204RF-AQIA01017118.1-igkv |(160930, 161230)|2.91395691076|(0.993,0.938,0.995)|-1
-TTGQVVLTQSPATLSLSPGERATLSCRASQSVS------SSLAWYQQKPGQAPRLLIYG
A---------SSRATGIPDRFSGSG--SGTEFTLT------IS-SLEPEDFAVYYCQKYS
SSP--
>V205RF-AQIA01017118.1-igkv |(166412, 166712)|2.9859000027|(0.995,0.999,0.992)|-1
-VRCDIQMTQAPSFLSASVGDRVTITCQASQSIS------NDLAWYQQKPGKSPTLLIYD
A---------TNLHTGVPSRFSGSG--SGADYSLT------IS-SLELEDFAAYYCQQEY
SYP--
>V206RF-AQIA01017120.1-igkv |(6524, 6816)|2.88136248136|(0.995,0.913,1.000)|-1
-SRGDIVMTQSPAFVSVTPGEKVTITCQASEGIS------NYLHWYQQKPDQAPKLFIQY
A---------SQSISGVPSRFTGSG--SGTDFTFT------IS-SLEVEDAATYYCQQGN
-----
>V207RF-AQIA01017120.1-igkv |(22790, 23081)|2.98688400513|(0.998,0.996,0.993)|-1
----DIQMTQSPSSLSASVGDTVTITCRASQSFS------SSLAWYQQKPGKAPKLLIYS
A---------SSLQSGVPSRFSGSK--SGTDFTLT------IS-SLQPEDIASYYCQQYY
SYP--
>V208RF-AQIA01017120.1-igkv |(38344, 38636)|3.0|(1.000,1.000,1.000)|-1
-AKCDIQMTQSPSSLSASVGDRVTITCRASQTIS------SYLAWYQQKPGKVPKLLIYA
A---------SSLESGVPSRFSGSG--SGTEFTLT------IS-SLQPEDFATYYCQQHN
-----
>V209RF-AQIA01017120.1-igkv |(57654, 57954)|2.96516337871|(1.000,1.000,0.969)|-1
-ARCDIQMTQSPSSLSASVGDRVTITCRASQGIS------TYLNWYQQKPGKAPKLLIYA
A---------SSLQSGVPSRFSGSG--SGTEFTLT------IS-SLQPEDFATYYCLQYN
SKP--
>V210RF-AQIA01017120.1-igkv |(72400, 72698)|2.99083600705|(1.000,0.995,0.996)|-1
-TTGEIVMTQSPATLSLSPGERATLSCRASQSVS------SSLAWYQQKPGQAPRLLIYG
A---------SSRATGIPDRFSGSG--SGTEFTLT------IS-SLEPEDFAVYYCQQYS
NW---
>V211RF-AQIA01017120.1-igkv |(84992, 85292)|2.96563765192|(0.999,1.000,0.970)|-1
-ARCDIQMTQSPSSLSASVGDRVTITCRASQGIS------NYLNWYQQKPGKAPKLLIYA
A---------SSLQSGVPSRFSGSG--SGTEFTLT------IS-SLQPEDFATYYCQPFK
NYL--
>V213RF-AQIA01017123.1-igkv |(8475, 8775)|3.0|(1.000,1.000,1.000)|-1
-ARCDIQLTQSPSSLSASVGDRVTITCRASQGIS------SYLAWYQQKPGKAPKLLIYK
A---------STLQSGVPSRFSGSG--SGTDFTLT------IS-SLQPEDFAVYYCQQRN
SYP--
>V214RF-AQIA01017123.1-igkv |(15101, 15401)|2.99899600001|(1.000,0.999,1.000)|-1
-AKCDIQMTQSPSSLSASVGDRVTITCRASQGIS------SYLAWYQQKPGKAPKPLIYY
A---------SNLESGVPSRFSGSG--SGTEFTLT------IS-SLQPEDFATYYCQQYN
SDP--
>V215RF-AQIA01017123.1-igkv |(32082, 32382)|2.95624064902|(1.000,1.000,0.962)|-1
-ARCDIQMTQSPSSLSASVGDRVTITCRASQGIS------NYLSWYQQKPGKAPKLLIYA
A---------SSLQSGVPSRFSGSG--SGTEFTLT------IS-SLQPEDFATYYCLQGY
STP--
>V216RF-AQIA01017123.1-igkv |(42629, 42935)|2.97834411275|(0.999,0.991,0.989)|-1
-----TVMTQSPATLSLSPGERATLSCRASQSVS------SSLAWYQQKPGQAPRLLIYY
A---------SSRATGIPDRFSGSG--SGTEFTLTISSTLTIS-SLDPEDVGVYYCQKYN
DWP--
>V217RF-AQIA01017125.1-igkv |(705, 1005)|3.0|(1.000,1.000,1.000)|-1
-ARCDIQLTQSPSSLSASVGDRVTITCRASQGIS------SYLAWYQQKPGKAPKLLIYA
A---------SNLQSGVPSRFSGSG--SGTDFTLT------IS-SLQPEDFAVYYCQQRN
SYP--
>V218RF-AQIA01017126.1-igkv |(2367, 2667)|2.99496000066|(0.999,1.000,0.996)|-1
-ARCDIQMTQSPSSLSASVGDRVTITCRASQGIS------SYLNWYQQKPGKAPKLLIYY
A---------NSLASGVPSRFSGSG--SGTDYTLT------IS-SLQPEDFATYYCQQGN
SNP--
>V219RF-AQIA01017126.1-igkv |(20855, 21155)|2.98394800078|(0.995,0.992,0.997)|-1
-TTGEIVMTQSPATLSLSPGETATISCRTSQSVS------SYLAWYQQKPGQAPRLLIYG
A---------SSRATGIPDRFSGSG--SGTDFTLT------IS-SLEPEDFAVYYCQETS
NLS--
>V220RF-AQIA01017128.1-igkv |(28886, 29186)|2.98885201038|(0.998,0.992,0.999)|-1
-ARCDIQMTQSPSSLSASVGDTVTITCRASQGIS------SYLNWFQQKPGKAPKLLIYA
A---------SSLESGVPSRFSGSG--SGTEFTLT------IS-SLQPEDFATYYCLQYN
SYP--
>V222RF-AQIA01017128.1-igkv |(51771, 52071)|2.98064403777|(0.998,0.990,0.993)|-1
-TTGEIVMTQSPATLSLSPGERATLSCRASQSVS------SRLAWYQQKPGQAPRLLIYG
A---------SSRATGIPDRFSGSG--SGTEFTLT------IS-SLEPEDVGVYYCQQDY
SWP--
>V223RF-AQIA01017128.1-igkv |(94686, 94986)|3.0|(1.000,1.000,1.000)|-1
-ARCDIQMTQSPSSLSASVGDRVTITCRASQGIS------SYLAWYQQKPGKAPKLLIYD
A---------SNLQSGVPSRFSGSG--SGTDFTLT------IS-SLQPEDFATYYCQQHN
SYP--
>V224RF-AQIA01017128.1-igkv |(113498, 113796)|2.92982233718|(0.996,0.995,0.948)|-1
-TTGEIVMTQSPATLSLSPGERATLSCRASQSVS------SSLAWYQQKPGQAPRLLIYG
A---------SSRATGIPDRFSGSG--SGTDFTLT------IS-SLEPEDVAVYYCLQRS
NW---
>V225RF-AQIA01017130.1-igkv |(1559, 1859)|2.99280401921|(1.000,1.000,0.993)|-1
-ARCDIQMTQSPSSLSASVGDKVTITCHASQGIS------SWLAWYQQKPGKAPKPLIYK
A---------SSLQSGVPSRFSGSG--SGTDYTLT------IS-SLQPEDFATYYCQQYD
NLP--
>V226RF-AQIA01017133.1-igkv |(667, 967)|3.0|(1.000,1.000,1.000)|-1
-ARCDIQMTQSPSSLSASVGDKVTITCHASQGIS------SWLAWYQQKPGKAPKPLIYK
A---------SSLQSGVPSRFSGSG--SGTDFTLT------IS-SLQPEDFATYYCQQYS
SYP--
>V227RF-AQIA01017135.1-igkv |(10903, 11203)|3.0|(1.000,1.000,1.000)|-1
-AKCDIQMTQSPSSLSASVGDKVTITCQASQSIS------SWLAWYQQKPGKAPKPLIYK
A---------SSLESGVPSRFSGSG--SGTDFTLT------IS-SLQPEDFATYYCQQHN
SYP--
>V228RF-AQIA01017135.1-igkv |(26554, 26853)|2.9022366056|(0.984,0.952,0.971)|-1
-TTGETVMTQSPATLSLSPGERATLSCRASQSVG------STLAWYQQKPGQAPRLLIYG
A---------SSRATGIPDRFSGSG--SGTEFTLT------IS-SLEPEDVGVYYCQQES
NWK--
>V229RF-AQIA01017139.1-igkv |(38517, 38829)|2.94253608204|(0.979,0.989,0.975)|-1
-CNGDIVLTQSPASLAVSPGQRATITCRASESVSFF--GINLIHWYQQKPGQPPKLLIYQ
A---------SNKDTGVPARFSGSG--SGTDFTLT------IN-PVEADDAADYYCLQSK
NSP--
>V232RF-AQIA01066360.1-ighv |(8136, 8449)|2.95291847018|(1.000,0.998,0.961)|-1
-VQCEVQLVE-SGGGLVQPGGSLRLSCAASGFT-F---SNYYMHWVRQAQGKGLEWVGLI
RNKANSYT--TEYAAAVKGRFTISRDDSKNTLYLQ------MS-SLKTEDTALYYCT---
-----
>V234RF-AQIA01066360.1-ighv |(57288, 57597)|2.84292729297|(0.939,0.924,0.992)|-1
-VQCEVQLVE-SGGGLVQPGGSLRLSCTGSGFT-F---SSYYMYWIRQAPGKGLQWVSAI
NT--GGGS--TWYTDSVKGRFTISKENAKNTLYLQ------MD-SLRAEDTAVYYCAK--
-----
>V236RF-AQIA01066362.1-ighv |(12791, 13106)|3.0|(1.000,1.000,1.000)|-1
-VQCEVQLVE-SGGGLVQPGGSLRLSCAASGFT-F---SNYWMSWVRQAPGKGLEWVGFI
KNKADGGT--AAYAESVKGRFTISRDDSKNTLYLQ------MN-SLKTEDTAVYYCTR--
-----
>V237RF-AQIA01066366.1-ighv |(294, 607)|2.99798400013|(1.000,1.000,0.998)|-1
-VQCEVQLVE-SGGGLVQPGGSLRLSCAASGFT-F---SNYWMSWVRQAPGKGLEWVGFI
KNKADGGT--ADYAASVKGRFTISRDDSKNTLYLQ------MS-SLKTEDTAVYYCT---
-----
>V242RF-AQIA01066385.1-ighv |(14117, 14432)|3.0|(1.000,1.000,1.000)|-1
-VQCEVQLVE-SGGGLVQPGGSLRLSCAASGFT-F---SDYAMDWVRQAPGKGLEWVGFI
RSKAYGGT--AEYAASVKGRFTISRDDSKNTAYLQ------MS-SLKTEDTAVYYCTR--
-----
>V243RF-AQIA01066387.1-ighv |(6564, 6873)|2.99596000066|(1.000,0.999,0.997)|-1
-VQCEVQLVE-SGGGLVQPGGSLRLSCAASGFT-F---GDYGMHWVRQAPGKGLEWVSSI
SNT--GKT--IYYADSVKGRFTVSRDNAKNSLSLQ------MS-SLRAEDTAVYYCTR--
-----
>V244RF-AQIA01066387.1-ighv |(11668, 11974)|3.0|(1.000,1.000,1.000)|-1
-VQCEVQLVE-SGGGLVQPGGSLRLSCAASGFT-F---SSYGMSWVRQAPGKGLEWVSAI
SS---GGS--TYYADSVKGRFTISRDNSKNTLSLQ------MN-SLRAEDTAVYYCAK--
-----
>V246RF-AQIA01066387.1-ighv |(66519, 66828)|2.99899600001|(1.000,1.000,0.999)|-1
-VQCEVQLVE-SGGGLAKPGGSLRLSCAASGFT-F---SDYYMDWVRQAPGKGLEWVSRI
SN--GGGS--TWYADSVKGRFTISRENAKNTLYLQ------MN-SLRAEDTAVYYCAR--
-----
>V247RF-AQIA01066387.1-ighv |(87163, 87466)|2.95304987297|(0.993,0.991,0.971)|-1
-VQCEVQLAE-SGGGLVQPGGSLRLSCAASGFT-I---SSYWMSWVCQAPGKGLEWLSDI
Y----GST--MYYGDSVKGLFTVSRDNAKNSLYLQ------MN-SLRAEDTAVYYCTR--
-----
>V249RF-AQIA01066387.1-ighv |(108611, 108920)|2.98150011724|(0.997,0.986,0.999)|-1
-VLSQLQLQE-SGPGLVKPSETLSLTCAVSGGS-I---SSNYWSWIRQPPGKGLEWIGRI
SGS--GGS--TDYNPSLKSRVTISTDTSKNQFSLK------LS-SVTAADTAVYYCAR--
-----
>V251RF-AQIA01066395.1-ighv |(16120, 16435)|2.99396400065|(0.999,0.996,0.999)|-1
-VQCEVQLVE-SGGGLVQPGGSLRLSCAASGFT-F---SDHYMFWVRQAPGKGLEWVGFI
RSKAYGGT--AEYAASVKGRFTISRDDSKSIAYLQ------MS-SLKTEDTAVYYCTR--
-----
>V253RF-AQIA01066397.1-ighv |(62192, 62507)|2.99798400013|(1.000,0.998,1.000)|-1
-VQCEVQLVE-SGGGLVQPGGSLRLSCAASGFT-F---SNHYMYWVRQAPGKGLEWVGFI
RSKAYGGT--AEYAASVKGRFTISRDDSKNTAYLQ------MS-SLKTEDTAVYYCTR--
-----
>V254RF-AQIA01073275.1-ighv |(1217, 1526)|2.8379146159|(0.990,0.959,0.915)|-1
-DHSEVQLVQ-SGAEVKKPGASVKISCKASGYT-F---TDYYLHWVRQAPGKGLEWMGRV
DPE--DGE--ADYAQKFQDRVTITADTSTDTAYME------LS-SLRSEDTAVYYCAT--
-----
>V255RF-AQIA01073275.1-ighv |(9357, 9667)|2.99280401921|(1.000,1.000,0.993)|-1
-VQCEVQLVE-SGGGLVQPGGSLRLSCVASGFT-F---SDHYMDWVRQAPGKGLEWVSSI
STG-SGST--TLYPDSVKGRFTISRDNAKNTVYLQ------MN-SLRAEDTAVYYCA---
-----
>V256RF-AQIA01075132.1-igkv |(288, 575)|2.98021230726|(0.998,0.984,0.999)|-1
-----TVMTQSPATLSLSPGERATLSCRASQSVG------SNLAWYQQKPGQAPRLLIYD
A---------SSRATGIPDRFSGSG--SGTEFTLT------IS-SLEPEDVGVYYCQQYN
NWN--
>V3RF-ABDC01165520.1-igkv |(7469, 7769)|2.98482001102|(0.992,0.998,0.995)|1
-ARCDIQMTQSPSSLAASVGDTVTISCRASQGIS------SWLSWHQQKPGKPPKTLINK
A---------SNLESGVPSRFSGSG--SGTDFTLT------IK-GLQPEDFATYYCQQYD
SSP--
>V4RF-ABDC01231268.1-ighv |(5361, 5667)|2.99393200206|(0.999,0.995,1.000)|1
-VQCDVQLLE-SGGGLVQPGGSLRLSCAASGFT-F---SSYYMHWVRQAPGKGLEWVSTI
SS---GGS--TYYADAVKGRFTISRDNGKSSLYLQ------MN-SLKAEDTAVYYCAR--
-----
>V6RF-ABDC01231272.1-ighv |(378, 697)|2.97478801933|(0.990,0.997,0.988)|1
-VQCEVQLVE-SGGGLVQPGGSLRLSCVASGFT-L---TSYGMNWVRQAPGKGLEWISYI
YS----SS--TSYADSVKGRFTISTDNGKNSLYLQ------MN-SLRAEDTAMYYCARHT
VRG--
>V7RF-ABDC01231274.1-ighv |(17, 332)|2.99289600501|(0.999,1.000,0.994)|1
-VQCEVQLVE-SGGGLAQPGGSLRLSCAASGFT-F---SSYYMYWVRQAPGKGLEWVGFV
RNKANGGT--AEYAASVKGRFTISRDDSKSTAYLQ------MN-SLRAEDTALYYCAR--
-----
>V8RF-ABDC01231277.1-ighv |(694, 1003)|2.99599600001|(0.999,0.998,0.999)|1
-VQCEVQLAE-SGGGLVQPGGSLRLSCAASGFT-F---SNYYMYWVRQAPGKGLEWISTI
SN--SGSS--TGYADSVKGRFTTSRDNSKNMLYLQ------MN-SLKAEDTALYYCAR--
-----
>V9RF-ABDC01282056.1-ighv |(476, 782)|2.98432022844|(0.999,1.000,0.986)|1
-VQCEVQLVE-SGGGLVQPGGSLKLSCAASGFT-F---SSYDMHWVRQAPGKGLEWVSVI
GI---GGS--TYYADAMKGRFTISRDNGKNMLYLQ------MS-SVQAEDTAVYYCTR--
-----
>V10RF-ABDC01282057.1-ighv |(6536, 6858)|2.98758408012|(1.000,0.998,0.990)|1
-VQCEVQLVE-SGGGLVQPGGSLRLSCAASGFT-F---SSYWMYWVRQAPGKGLEWVSRI
NP--DGGS--TNYADAVKGRFTISRDNGKNTLYLQ------MN-SLKAEDTAVYYCARDT
VT---
>V12RF-ABDC01282065.1-ighv |(718, 1027)|2.89718600389|(0.950,0.999,0.958)|1
-VQCEVQLVE-SGGGLVPPGGSLRLSCAASGFT-F---SDYWMSWIRQAPGKGLEWVGEI
NG--DGGN--TNYADAMKGRFTISRDNSKNTLYLQ------MN-SLRAKDTAVYYCGR--
-----
>V14RF-ABDC01296165.1-iglv |(8050, 8360)|2.99194800078|(0.999,0.997,0.996)|1
-SLANFVLTQ-PSSVSGSPGQKVTISCTRSSG---NIG-SNYVHWYQQRPGSAPTTVIYR
D---------DKRPSGVPDRFSGSSDSSSNSASLT------IS-GLQSEDEADYYCQSYD
ASA--
>V17RF-ABDC01314388.1-ighv |(6282, 6597)|2.94289528658|(0.964,1.000,0.986)|1
-VQCEVQLVE-SGGGLVQPGGSLKLSCAASGLT-F---SDYWMSWIRQAPGKGLEWAGLN
RSKAYGGI--AEYAASVKDRFTISRDDSKSTAYLQ------MN-SLKAKDTALYYCVR--
-----
>V18RF-ABDC01318810.1-iglv |(15156, 15463)|2.95130128432|(0.976,0.996,0.981)|1
-SWAQSALTQ-PPSVSGAPGETVTISCSGSSS---NI-GGYDANWYQQLPGTAPKLLIYG
N---------SNRPSGVPARFSGSK--SGSSASLT------IA-GLQAEDEGDYYCSSWD
SSLS-
>V21RF-ABDC01342328.1-iglv |(12642, 12952)|2.89516605151|(0.982,0.993,0.931)|1
-SLANFFLTQ-PSSVSGSPGQKVTISCTRSSG---NIG-SNYVHWYQQRPGSAPSTVIYE
Y---------NKRPSGVPDRFSGSMDSSSNSASLT------IS-GLQSEDEADYYCQSYD
GSY--
>V24RF-ABDC01349227.1-iglv |(6289, 6580)|2.86117027154|(0.979,0.958,0.934)|1
--SVASQVTQ-VPAVSVALGQTARITCQ---G---DSLSSYYPGWYQQKPSQAPVLVVYG
N---------NERPSGIPERFSGSK--SGNTATLT------IS-GAQVEDEADYYCGSYA
GS---
>V25RF-ABDC01349230.1-iglv |(865, 1165)|2.97476801985|(0.995,0.988,0.992)|1
--SVASQLTQ-VPAVSVALGQTASITCQ---G---DGLSSDYANWYQQKPGQAPVLLIYG
E---------NQRPSGIPERFSSSD--SGDTATLT------IS-GAQAGDEADYYCQVWD
SENNK
>V30RF-ABDC01351837.1-igkv |(9264, 9579)|2.90428330382|(0.951,0.980,0.980)|1
-SSGDVVMTQTPLSLSVTPGESASISCRASQSIQDS-DGNTYLNWFLQKPGQPPRRLIHK
V---------SNRDSGVSDGFSGSG--SGTDFTLK------IS-RVEAEDVGVYYCMQAS
YFP--
>V33RF-ABDC01359388.1-iglv |(1496, 1806)|2.98097252412|(0.999,0.983,1.000)|1
-SLANFVLTQ-PSSVSGSPGQKVTVSCTRSSG---NIG-SNYVYWYQQRPGSAPTTVIYR
D---------DQRPSGVPDRFSGSIDSSSNSASLT------IS-GLQSEDEADYYCQSYD
GSA--
>V37RF-ABDC01360666.1-igkv |(4785, 5100)|2.92858870068|(0.985,0.968,0.977)|1
-SSGDIVMTQTPLSLPVTPGESASISCRSSQSLLHS-DGKTYLQWFLQKPGQSPQLLIYL
G---------FTRASGVPDRFSGSG--SGTDFTLK------IS-KVEAEDVGVYYCMQTI
QFP--
>V41RF-ABDC01373300.1-ighv |(1180, 1499)|2.97376801985|(0.990,0.997,0.987)|1
-VQCEVQLVE-SGGGLVQPGGSLRLSCVASGFT-L---TSYGMNWVRQAPGKGLEWISYI
YS----SS--TSYADSVKGRFTISTDNGKNTLYLQ------MN-SLRAEDTAMYYCARHT
VRG--
>V42RF-ABDC01373301.1-ighv |(8478, 8785)|2.99280401921|(1.000,1.000,0.993)|1
-VQCEVQLVE-SGGGLVQPGGSLRLSCAASGFT-F---SSYYMHWVRQAPGKGLEWVSRI
NP--DGGS--TIYADAVKGRFTISRDNSKNSLYLQ------MN-SLKAEDTAVYYCA---
-----
>V43RF-ABDC01375549.1-ighv |(174, 483)|2.99899200002|(0.999,1.000,1.000)|1
-VQCEVQLVE-SGGGLVQPGGSLRLSCAASGFT-F---SSYWMNWVRQAPGKGLEWVADI
NG--DGGS--TNYADAVKGRFTISRDNAKNSLYLQ------MN-SLRAEDTALYYCAT--
-----
>V44RF-ABDC01375549.1-ighv |(8525, 8840)|2.97950008499|(0.995,1.000,0.985)|1
-VQCEVQLVE-SGGGLVQPGGSLKLSCVASGFT-F---SDYYMHWVRQAPGKGLEWVAFI
RNKANGGT--AEYAASVKGRFTISRDDSKSTAYLQ------MN-SLRTEDTAVYYCER--
-----
>V45RF-ABDC01377237.1-ighv |(8637, 8946)|2.99596000066|(1.000,0.997,0.999)|1
-VQCDVQLVE-SGGGLVQPGGSLRLSCAASGFT-F---SSYWMYWVRQAPGKGLEWVSAI
SG--NGGS--TYYADAVKGRFTISRDNGKNTLYLQ------MN-SLKAEDTAVYYCAR--
-----
>V46RF-ABDC01377653.1-trav |(1660, 1950)|2.89429565252|(0.974,0.975,0.948)|1
-MSRGEKLEQSP-FLSVQEGDSSVINCTYTET-----TS-TYFYWYKQGPREGLQLIMTI
FSY---ED--KK----QERRLSVLLNKMEKHLSLH------IS-DTQPADSAVYFCAVS-
-----
>V49RF-ABDC01379531.1-trav |(895, 1198)|2.86994173299|(0.990,0.912,0.992)|1
-SGMAQKVTQSQPAMWVQEKEAVTLDCTYDTR-----DSTYYLFWYKQPSSGEMILLIRQ
DSY---NQ--QN---ATEGRYSLNFQKASKSIKLV------IS-ASQVGDSAIYFCALSE
-----
>V50RF-ABDC01379531.1-trav |(6655, 6946)|2.9758720041|(0.992,0.996,0.988)|1
VRSQQKEVDQTPEFLSVSEGAMASLNCTYSNT-----AS-RYFFWYRQYSGKGPELLVSI
FST---GD--K-----QEGRFTAQLNKASRYVSLV------IR-DSQPSDSATYLCAL--
-----
>V52RF-ABDC01384523.1-iglv |(1675, 1975)|2.97880001921|(0.995,0.988,0.996)|1
--SVASQLTQ-VPAVSVALGQTASITCQ---G---DGLSSDYANWYQQKPGQAPVLLIYG
E---------NQRPSGIPERFSSSV--SGDTATLT------IS-GAQAGDEADYYCQVWD
SENNK
>V53RF-ABDC01388284.1-trav |(3312, 3602)|2.85573926526|(0.964,0.911,0.996)|1
-VRSQQVVEQTPESLVVSEGTTASLSCTYSDT-----AS-QSFLWYRQYSGKGPELLMFI
YST---GD--K-----EEGRFTAQLNKASRNVSLL------IR-DSQPSDSATYLCAVS-
-----
>V58RF-ABDC01394567.1-igkv |(5428, 5726)|2.92149471963|(0.957,0.984,0.987)|1
-TRCDIQMTQSPSSVSASPGETVTISCRASQGIN------NNLVWYQHKPGKPPKSLIYG
A---------SNLYPGVLSRFSGSG--SGTDYSLT------IR-GLETDDAATYYCQQYN
SF---
>V67RF-ABDC01407894.1-ighv |(4990, 5305)|2.99393200206|(0.999,1.000,0.995)|1
-VQCEVQLVE-SGGGLAQPGGSLRLSCAASGFT-F---SDYYMSWVRQAPGKGLEWVGFI
RNKANGGT--AEYAASVKGRFTISRDDSKSTTYLQ------MN-SLRAEDTALYYCAR--
-----
>V69RF-ABDC01417489.1-ighv |(3793, 4108)|2.99899600001|(1.000,1.000,0.999)|1
-VQCEVQLVE-SGGGLAQPGGSLRLSCAASGFT-F---SDYYMNWVRQAPGKGLEWVGVI
RNKANGGT--AEYAASVKGRFTISRDDSKSTAYLQ------MN-SLRAEDTALYYCAR--
-----
>V70RF-ABDC01417539.1-iglv |(3342, 3652)|2.95004798746|(0.998,0.994,0.963)|1
-SLANIVLTQ-PSSVSGSPGQKVTLSCTRSSG---DIG-SSYVSWYQQRPGSAPTTVIYE
D---------NERPSGVPDRFSGSIDSSSNSASLT------IS-ALQSEDEADYYCQSYD
DSY--
>V72RF-ABDC01418168.1-iglv |(5505, 5817)|2.89868542411|(0.982,0.976,0.946)|1
-SLANLVLTQ-PSSVSGSPGQKVTISCTRSSG---DIG-DAYVTWYQQRPGSAPTTVIIG
D---------DQRPSRVPDRFSGSIDSSSNSASLT------IS-GLQSEDEADYYCQSYG
IRNS-
>V73RF-ABDC01418428.1-trav |(328, 621)|2.91992564019|(0.953,0.987,0.990)|1
-VRGGENVGLHPPTLSVQEGDTSVINCSYSDS-----AS-SYLLWYKQKLGKSPQSIIDI
RSN---MG--KK----QKGRFTVFLSKTAKHLSLH------IA-ATQPGDSAVYFCAES-
-----
>V74RF-ABDC01421861.1-ighv |(7067, 7376)|2.96496052424|(0.984,0.982,1.000)|1
-VQCEVQLLE-SGGGLVQPGGSLRLSCAASGFT-F---SSYYMSWVRQAPRKGLEWVSYI
NG--DGGY--TNYADAVKGRFTISRDNSKNSLYLQ------MN-NLKAEDTAMYYCAR--
-----
>V75RF-ABDC01422153.1-iglv |(2569, 2876)|2.97578801933|(0.989,0.991,0.996)|1
-SWAQSALTQ-PPSASGAPGQSVTISCSGSSS---NI-GGNYANWYQQLPGTAPKLLIYG
N---------SDRPSGVPARFSGSK--SGSSASLT------IA-GLQAEDEGDYYCSSWD
DSLS-
>V76RF-ABDC01423814.1-ighv |(3316, 3625)|3.0|(1.000,1.000,1.000)|1
-VQCEVQLVE-SGGGLVQPGGSLRLSCAASGFT-F---SSYAMSWVRQAPGKGLEWVSTI
SN--GGGS--TYYTDAVKGRFTISRDNSKNSLYLQ------MN-SLRAEDTALYYCAR--
-----
>V83RF-ABDC01442374.1-iglv |(1223, 1533)|2.97609640489|(0.997,0.982,0.998)|1
-SLTNLVLTQ-PNSVSGSPGQKVTISCTRSTG---SIG-GYFVHWYQQRPGSAPTTVIYA
D---------DQRPSGVPDRFSGSIDSSSNSASLT------IS-GLQSEDEADYYCQSYD
DSY--
>V86RF-ABDC01449636.1-iglv |(4939, 5239)|2.97940816598|(0.998,0.986,0.996)|1
--SVASQLTQ-VPAVSVALGQTARITCQ---G---DSLSSYYPNWYQQKPGQAPVLLIYG
E---------NQRPSGIPERFSSSV--SGDTATLT------IS-GAQAGDEADYYCQVWD
SENNK
>V87RF-ABDC01454767.1-ighv |(1191, 1500)|2.99899200002|(0.999,1.000,1.000)|1
-VQCEVQLVE-SGGGLVQPGGSLRLSCAASGFT-F---SSYWMNWVRQAPGKGLEWVADI
NG--DGGS--TNYADAVKGRFTISRDNAKNSLYLQ------MN-SLRAEDTALYYCAT--
-----
>V88RF-ABDC01466438.1-iglv |(4568, 4875)|2.97578801933|(0.989,0.991,0.996)|1
-SWAQSALTQ-PPSASGAPGQSVTISCSGSSS---NI-GGNYANWYQQLPGTAPKLLIYG
N---------SDRPSGVPARFSGSK--SGSSASLT------IA-GLQAEDEGDYYCSSWD
DSLS-
>V93RF-ABDC01491653.1-trav |(356, 647)|2.9758720041|(0.992,0.996,0.988)|1
VRSQQKEVDQTPEFLSVSEGAMASLNCTYSNT-----AS-RYFFWYRQYSGKGPELLVSI
FST---GD--K-----QEGRFTAQLNKASRYVSLV------IR-DSQPSDSATYLCAL--
-----
>V95RF-ABDC01497734.1-trdv |(531, 837)|2.75263136878|(0.928,0.952,0.883)|1
-STVAQKVTQVETARSTTVGAVVTLNCQYETSG----GAYFFIFWYKQLPSKEMIFLLRQ
GSD---LY--NA---KDDQRYSVNFQEEANSIDLT------IS-ALRLEDSAKYFCALAE
-----
>V98RF-ABDC01522041.1-igkv |(82, 382)|2.98482001102|(0.992,0.998,0.995)|1
-ARCDIQMTQSPSSLAASVGDTVTISCRASQGIS------SWLSWHQQKPGKPPKTLINK
A---------SNLESGVPSRFSGSG--SGTDFTLT------IK-GLQPEDFATYYCQQYD
SSP--
>V103RF-ABDC01533415.1-trav |(1221, 1515)|2.95496034001|(0.978,0.992,0.986)|1
-GTDGDSVTQTEGPVTLPEGEALTLNCTYQSN-----YA-AFLFWYVQFQNKEPELLLKS
SSE---TQ---E---TDGRGFQANNNKSDSSFHLK------KP-SVQLSDSAVYFCAMR-
-----
>V104RF-ABDC01542818.1-trav |(328, 615)|2.87823134214|(0.967,0.933,0.984)|1
-VSSEDKVVQSPPSMAVHEGDSATLTCNYVVS-----YF-RSLQWYKQEK-NAPVFLFTL
TSS---GI--EK----KSGRFSSILDNK-ELSTLN------IT-ATQTGDSAIYFCAVE-
-----
>V116RF-ABDC01281097.1-trbv |(3192, 3492)|2.79204630182|(0.954,0.902,0.947)|-1
--HTEPGVIQTPSHQVTKKGQEVILRCDPISG-------HLYFYWYRQISGQKLEFLVSF
YND---NI--SEKSELFTDQFSLKRPK-GSYLALK------IQ-STELEDSAMYFCASSK
-----
>V118RF-ABDC01345813.1-ighv |(1734, 2043)|2.91077738452|(0.994,0.977,0.949)|-1
-VRCEVQLVE-SGGGLVQPGGSLRLSCAASGFT-F---SSYGMHWVRQAPGKGLEWVAVI
RY--DGSK--QYYADAVKGRFTISRDNSKNMLYLQ------MN-SLKVEDTAMYYCAK--
-----
>V120RF-ABDC01345817.1-ighv |(603, 906)|2.88506016446|(0.965,0.984,0.940)|-1
-VQCEVQLVQ-SGGGLVQPGGSLRLSCAASGFT-F---SSYGMNWVRQAPGKGLEWVSYI
YS----SS--TYYADSVKGRFTTSRENSQNMLYLQ------MN-SLRDEDTAMYYCAR--
-----
>V124RF-ABDC01368601.1-trbv |(2109, 2406)|2.89100384073|(0.989,0.935,0.979)|-1
--SVTAGVTQTPRFQILKTGQNMTLMCTQDTN-------HDSMYWYRQDPGLGLRLIHYS
VAA---GT--TARGD-IPEGYNVSRSS-TETFSLT------ME-SATPSQTSAYFCASSE
-----
>V127RF-ABDC01396906.1-ighv |(901, 1210)|2.99196000066|(0.998,0.995,0.999)|-1
-VQCEVQLVE-SGGGLVQPGGSLRLSCAASGFT-F---DYYGMNWVRQAPGKGLEWVSYI
SW--NGGS--TYYADAVKGRFTISRDNSKNMLYLQ------MN-SLRAQDTAVYYCAR--
-----
>V131RF-ABDC01425625.1-iglv |(109, 419)|2.90203393391|(0.998,0.997,0.927)|-1
-SLANFVLTQ-PSSVSGSPGQKVTISCTRSSG---NIG-SYYVQWYQQRPGSAPSTVIYK
H---------NKRPSGVPDRFSGSIDSSSNSASLT------IS-GLQSEDEADYYCQSYD
GSY--
>V132RF-ABDC01454736.1-trav |(1674, 1968)|2.93761652199|(0.971,0.986,0.982)|-1
-RTHGNSVTQTEGQVTLSEKAFLHINCTYTST-----GY-PSLFWYVQYPGEGPQLLLKA
ATA---ND---K---GMNKGFEATYKKETTSFHLE------KA-SVHESDSAVYYCAMS-
-----
>V133RF-ABDC01455982.1-trbv |(239, 546)|2.82423415562|(0.975,0.970,0.901)|-1
--HTDAGITQNPRHKITEIGKQVTLSCHQNDN-------HFYMYWYRQDLGHGLRLIYYS
VDA---QS--TDKEE-VAEGYKVSRSN-KEDFLLF------LE-SATRSQTSVYFCASSE
YTA--
>V134RF-ABDC01465190.1-iglv |(381, 691)|2.98097252412|(0.999,0.983,1.000)|-1
-SLANFVLTQ-PSSVSGSPGQKVTVSCTRSSG---NIG-SNYVYWYQQRPGSAPTTVIYR
D---------DQRPSGVPDRFSGSIDSSSNSASLT------IS-GLQSEDEADYYCQSYD
GSA--
>V135RF-ABDC01471087.1-ighv |(643, 952)|2.99799600001|(0.999,1.000,0.999)|-1
-VQCEVQLVE-SGGGLVQPGGSLRLSCAASGFT-F---SDYWMNWVRQAPGKGLEWVAHI
RY--DGSK--QYYADAVKGRFTISRDNSKNSLYLQ------MN-SLRAEDTALYYCAR--
-----
>V136RF-ABDC01473376.1-trbv |(205, 505)|2.80807249552|(0.962,0.957,0.903)|-1
--SYDAKVTQTPGHLIKEKGQKASMDCTPQQG-------HNSLYWYQQSQNKELEFLVYF
ENK---EL--FDQTEMHKKRFSSKCPP-DSPCRLE------IL-SSEPGDSALYFCASSP
-----
>V138RF-ABDC01493416.1-ighv |(429, 735)|2.98374403277|(0.992,0.992,1.000)|-1
-VQCDVQLLE-SGGGLVQPGGSLRLSCAASGFT-L---SSYYMHWVRQAPGKGLEWVSTI
SS---GGS--TYYADAVKGRFTISRDNGKSSLYLQ------MN-SLKAEDTAVYYCAR--
-----
>V141RF-ABDC01540867.1-iglv |(1970, 2280)|2.99078801933|(1.000,0.993,0.998)|-1
-SLANFVLTQ-PSSVSGSPGQKVTISCTRSSG---NIE-SSYVHWYQQRPGSAPTTVIYD
D---------NERPSGVPDRFSGSIDSSSNSASLT------IS-GLQSEDEADYYCQSYD
ASA--
>V142RF-ABDC01560090.1-trbv |(258, 558)|2.90081576962|(0.963,0.989,0.952)|-1
--SMDTEVTQSPRYLVKGKEQKTKMDCVPKKG-------HSYVYWYQKKLEEGLKFLVYL
QDE---DI--IEKEEIINNRFSAQCPK-NSPCILE------IQ-STESGDSALYFCASSQ
-----
>V143RF-ABDC01562688.1-igkv |(1193, 1508)|2.79836337428|(0.988,0.884,0.970)|-1
-SSGDIVMTQTPLSLPVTPGETASISCRASQSIQYS-DGNTYLNWFLQKPGQPPKRLIYK
V---------SNRDSGVSDRFSGSG--SGTDFTLT------IS-RVEAEDVGVYYCMQAS
YYP--
>V145RF-ABDC01624510.1-iglv |(99, 409)|2.99078801933|(1.000,0.993,0.998)|-1
-SLANFVLTQ-PSSVSGSPGQKVTISCTRSSG---NIE-SSYVHWYQQRPGSAPTTVIYD
D---------NERPSGVPDRFSGSIDSSSNSASLT------IS-GLQSEDEADYYCQSYD
ASA--
>V1RF-ADFV01062069.1-trbv |(21787, 22100)|2.67006417842|(0.955,0.934,0.837)|1
--PIDTEVTQTPKHLVMGISNKKSLKCEQHMG-------HRAMYWYKQKAKKPPELMFVY
SYE---KL--SINES-VPSRFSPECPK-SSLLNLH------LH-ALQPEDSALYLCASSQ
DTALQ
>V4RF-ADFV01062069.1-trbv |(42333, 42630)|2.95429565252|(0.994,0.995,0.968)|1
--SLDTAVSQTPKYLVTQMGNDKSLKCEQNLG-------HDTMYWYKQDSKKFLKIMFSY
RNK---EP--ILNET-VPNRFSPDSPD-KAHLNLH------IK-SLELGDSAVYFCASSQ
-----
>V5RF-ADFV01062069.1-trbv |(46363, 46676)|2.70051545832|(0.964,0.917,0.866)|1
--PIDTEVTQTPKHLVMGMTNKKSLECEQHMG-------HNAMYWYKQKAKKPPELMFVY
NYE---KL--SINES-VPSRFSPECPK-SSLLNLH------LH-ALQPEDSALYLCASSQ
DTALQ
>V6RF-ADFV01062069.1-trbv |(54249, 54545)|2.84486656283|(0.964,0.904,0.995)|1
--PVEAGVTQTPRYLIKTRGQQVTLSCSPISG-------HQSVFWYQQTPGQGLQFLFEY
FSE---TQ--REKG-NFPDRFSGRQFS-NSRSEMN------VS-TLELGDSALYLCASSL
-----
>V7RF-ADFV01062069.1-trbv |(61551, 61848)|2.99696400065|(1.000,1.000,0.997)|1
--PVNAGVTQTPKFQVLKTGQSMTLQCAQDMN-------HNSMYWYRQDPGMGLRLIHYS
VGE---GT--TDKGE-VPDGYNVSRLN-TQDFSLR------LE-SAAPSQTSVYFCASSE
-----
>V8RF-ADFV01062071.1-trbv |(8280, 8577)|2.99296000066|(0.997,1.000,0.996)|1
--PVNAGVTQTPKFQVLKTGQSMTLQCAQDMN-------HNSMYWYRQDPGMGLRLIHYS
AVE---GI--TDKGE-VSDGYNVSRLN-KQNLLLR------LV-SAAPSQTSVYFCASSE
-----
>V9RF-ADFV01062071.1-trbv |(16301, 16614)|2.91517747845|(0.994,0.954,0.975)|1
--PLDTAVLQTPKYLVTQTGKKESLKCEQNLG-------HNAMYWYKQDSKKFLKIMFSY
SNK---EP--ILNET-VPNRFSPESPD-KSHLNLH------IS-SLELGDSAVYFCASSQ
DTALQ
>V11RF-ADFV01062071.1-trbv |(27836, 28133)|2.98097252412|(0.999,1.000,0.983)|1
--PVNAGVTQTPKFQVLKTGQSMTLQCAQDMN-------HNYMYWYRQDPGMGLRLIHYS
TGE---GT--TDKGE-VSDGYDVSRSN-TQNFLLR------LE-SAAPSQTSVYFCASSE
-----
>V15RF-ADFV01062075.1-trbv |(33395, 33695)|2.98392000218|(0.994,0.998,0.992)|1
--HTGAGVSQSPRYKVTKKGQDVALRCDPISG-------HVSLYWYRQTLRQGPEFLTYF
NYE---AQ--QDKSGLLSGRFSAERPE-GSVSTLK------IQ-RTEQGDTAVYLCASSL
-----
>V16RF-ADFV01062075.1-trbv |(40699, 40989)|2.92434411275|(0.981,0.973,0.971)|1
----ETGVTQSPTHLIKTRGQQVTLRCSPMSG-------HTSVYWYQQVLGQGLQFLLWY
NEE---AE--RERG-NFPRRFSGRQFP-NYSSELN------VN-ASLLEDSALYLCASSL
-----
>V17RF-ADFV01062075.1-trbv |(60057, 60353)|2.94684466791|(0.977,0.977,0.994)|1
--SVETGVTQSPTHLIKTRGQQVTLRCSPQSG-------HNTVSWYQQTLGQGPQFIVQY
YRE---EE--NGRG-NFPPRFSGRQFP-DYSSELN------VN-ASLLEDSALYLCASSL
-----
>V18RF-ADFV01062075.1-trbv |(69334, 69634)|2.83047955885|(0.921,0.986,0.942)|1
--HADTGVSQDPRHKITKRGRNVTFRCDPISE-------HNSLYWYQRTLGQGPEFLTDF
QNE---AQ--LDKSGLLSDHFSAERPK-GSFSTLK------IQ-RTEQGDSAMYLCASSL
-----
>V20RF-ADFV01062075.1-trbv |(83965, 84262)|2.85307913138|(0.981,0.992,0.904)|1
--HMDAGITQSPRHKVTETGTPVTLRCHQTEN-------HCYMYWYRQDLGHGLRLIHYS
YGV---KD--TDKGE-VSDGYSVSRSN-TEDFLLT------LG-SATHSQTSVYFCAISE
-----
>V21RF-ADFV01062075.1-trbv |(95774, 96074)|2.92152044138|(0.991,0.951,0.986)|1
--LIEAGVVQSPRYKIIEKKQPVAFWCNPISG-------HNTLYWYRQNLGQGPELLIRY
ENE---EA--VDDSQLPKDRFSAERLK-GVDSTLK------IQ-PAELGDSAVYLCASSL
-----
>V22RF-ADFV01062076.1-trbv |(7831, 8127)|2.97776801985|(0.996,0.993,0.989)|1
--PVDAGVTQSPTHLIKMRGQQVTLRCSPISG-------HTSVYWYQQALGQGPQFIIQY
YEE---EE--RGRG-NFPDRFSARQFP-NYSSELN------VN-ALLLGDSALYLCASSL
-----
>V25RF-ADFV01062079.1-trbv |(8562, 8862)|2.91698400013|(0.973,0.973,0.971)|1
--SPGEEVTQTPKHLVKGEGQKAKLYCAPIKG-------HSYVFWYQQVLKKEFKFLISF
QNE---NI--FDETGMPKERFSAKCLL-NSPRSLE------IQ-ATKLKDSAVYFCASSQ
-----
>V28RF-ADFV01062082.1-trbv |(9024, 9321)|2.96208424741|(0.997,0.970,0.998)|1
--LMEADIYQTPRYLVIRTGKKITLECSQTMG-------HDKMYWYQQDPGMELHLIHYS
YGV---NS--TEKGD-LSSESTVSRIR-TEHFPLT------LE-SARPSHTSQYLCASSE
-----
>V29RF-ADFV01062084.1-trbv |(20830, 21127)|2.92905475292|(0.996,0.963,0.976)|1
--LLEAQVTQNPRYLITVTGKKLTVTCSQNMN-------HEYMSWYRQDPGLGLRQIYYS
INV---EA--VDKGD-VPEGYNVSRKE-KRNFPLI------LE-SPSPNQTSLYFCASSL
-----
>V30RF-ADFV01062084.1-trbv |(25535, 25832)|2.93760565256|(0.989,0.960,0.992)|1
--LVDVKVTQSSRYLVKRMGEKVFLECVQDMD-------HERMFWYRQDPGLGLRLIYFS
YDV---QM--KEKGD-IPEGYSVSREK-KEHFSLI------LE-SASTNQTSMYLCASSL
-----
>V33RF-ADFV01106193.1-igkv |(26068, 26361)|2.97330822856|(0.995,0.982,0.997)|1
-TTREIVLTQSPATLSLSPGEKATLSCRASQSVG------SNLAWYQQKPGQAPRLLIYG
A---------TNRATGIPDRFSGSG--SGTDFTLT------IS-SLEPEDFAVYYCQKYG
S----
>V36RF-ADFV01106193.1-igkv |(68380, 68680)|2.99899600001|(1.000,1.000,0.999)|1
-SRCDIQMTQSPSSLSASVGDRVTITCRASQGIS------NYLNWYQQKPGKAPKLLIYD
A---------SSLQSGVPSRFSGSG--SGTEFTLT------IS-SLQPEDFAAYYCQQYK
SYP--
>V37RF-ADFV01106193.1-igkv |(80547, 80847)|2.97932022844|(0.998,0.985,0.997)|1
-TTGEIVLTQSPATLSLSTRERATISCTASQSV------SSYLAWYQQKPGQAPRLLIYY
A---------SSRATGIPDRFSGSG--SGTDFTLT------IS-SLEPEDFAVYYCQQYK
SFS--
>V38RF-ADFV01106195.1-igkv |(6885, 7185)|3.0|(1.000,1.000,1.000)|1
-SRCDIQMTQSPSSLSASVGDRVTITCRASQGIS------SYLAWYQQKPGKAPELLIYA
A---------STLQSGVPSRFSGSG--SGTEFTLT------IS-SLQPEDFATYYCQQYN
SYP--
>V39RF-ADFV01106195.1-igkv |(45397, 45697)|2.99899600001|(1.000,0.999,1.000)|1
-ARCDIQMTQSPSSLSASVGDRVTITCRASQGIS------KWLAWYQQKPGKAPKPLIYD
A---------SSLQSGVPSRFSGSG--SGTEFTLT------IS-SLQPEDFATYYCQQYN
SYP--
>V40RF-ADFV01106195.1-igkv |(64645, 64945)|3.0|(1.000,1.000,1.000)|1
-ARCDIQMTQSPTSLSASVGDRVTITCRASQGIS------SWLAWYQQKPGKAPKLLIYK
A---------SSLESGVPSRFSGSG--SGTEFTLT------IS-SLQPEDFATYYCQQYN
SDP--
>V42RF-ADFV01126738.1-iglv |(7858, 8168)|2.92860443651|(0.991,0.951,0.993)|1
-SLSQSVVTQ-PASLSASPGASARLTCTLRSG---INVGSYRISWYQQKPGSPPQYLLNY
YSD---SD--KGQGSGVPSRFSGSKDASTNAGISL------IS-GLQSEDEADYYCMI--
-----
>V43RF-ADFV01126738.1-iglv |(12674, 12983)|2.98980401921|(0.999,0.999,0.992)|1
-SWAQSVLTQ-PSSVSGTPGQRVTISCSGSSS---NIG-SNNVYWYQQLPGTAPKLLIYD
N---------NQRPSGVPDRFSGSK--SGTSASLA------IS-GLQTEDEADYYCEAWD
DSLSG
>V47RF-ADFV01126742.1-iglv |(25243, 25552)|2.97684066792|(0.998,0.999,0.981)|1
-SWAQSVLTQ-PPSVSGTPGQRVTISCSGSSS---NIG-SNNVYWYQQLPGTAPKLLIYY
N---------NQRPSGVPDRFSGSK--SGTLASLA------IT-GLRSEDEADYYCEAWD
DSLSG
>V49RF-ADFV01126756.1-iglv |(8462, 8772)|2.98892000218|(0.997,0.993,0.999)|1
-SWAQSALTQ-PRSVSGSPGQSVTISCTGTSS---DVGGYNYVSWYQQHPGTAPKLMIYD
V---------SKRPSGVSDRFSGSK--SGNTASLT------IS-GLQAEDEADYYCCSYA
SDDT-
>V51RF-ADFV01126759.1-iglv |(7253, 7556)|2.98020030738|(0.999,0.985,0.997)|1
-SATSYELTQ-PPSVSVAPGQTAKITCG---G---NNIGSKNVYWYQQKPGQAPVLVIYR
D---------SNRPSGIPERFSGSN--SGNTATLT------IS-AVEAGDEADYYCQVWD
STSDH
>V53RF-ADFV01126760.1-iglv |(18689, 18992)|2.98172803289|(0.992,0.990,1.000)|1
-SVASYELTQ-PPSVSVSPGQTAKITCS---G---DALPKKYAYWYQQKSGQTPVLIIYE
D---------SKRPSGIPERFSGSS--SGTMATLT------IS-GTQVEDEADYYCYSAD
SSGNH
>V57RF-ADFV01136793.1-ighv |(10260, 10566)|3.0|(1.000,1.000,1.000)|1
-VQCEVQLVE-SGGGLVQPGGSLRLSCVASGFT-F---SSYDMSWVRQAPGKGLEWVSYI
SS---GGS--TYYPDSVKGRFTISRDNAKNTLYLQ------MN-SLRAEDTAVYYCAK--
-----
>V58RF-ADFV01138112.1-igkv |(5360, 5660)|2.99798400013|(1.000,0.998,1.000)|1
-ARCDIQMTQSPSSLSASVGDKVTITCRASQGIS------NDLNWYQQKPGKAPKLLIYY
A---------SSLQSGIPSRFSGSG--SGTTYTLT------IS-SLQPEDFATYYCQQGY
STP--
>V59RF-ADFV01192035.1-trav |(8555, 8856)|2.79105656836|(0.973,0.875,0.981)|1
-GLRAQLVAQPEDQVTVAEGNPLTVKCTYSVS-----GN-PYLFWYVQYPNQGLQFLLKY
IAG---DN--LV---KGSYGFEAEFNKSQTSFYLK------KP-SALVSDSALYFCAVRD
-----
>V60RF-ADFV01192035.1-trav |(53089, 53379)|2.9641161971|(0.988,0.978,0.999)|1
-MNRGEDVEQSL-FLGVREGDSSVINCTYTDS-----SS-TYLYWYKQEPGAGLQLLTYI
FSN---MD--LK----QDQRLTVLLNKKDKHLSLR------IA-DTQTGDSAIYFCAES-
-----
>V61RF-ADFV01192035.1-trav |(63802, 64090)|2.94342463332|(0.981,0.968,0.996)|1
--VKSQKIEQNSEALNIQEGKTATLTCNYTNY-----SP-AYLLWYRQDPGRGPVFLLLI
REN---EK--EK----RKERLKVTFDTTLKQSLFH------IT-ASQPADSATYLCAL--
-----
>V62RF-ADFV01192035.1-trav |(73447, 73734)|2.90389594724|(0.982,0.936,0.995)|1
-ANGEKQVEHSPHFLGSQQGDVASVSCMYSVS-----RF-NNLQWYRQNTGMGPKHLLSM
YSA---GY--EK----QKGRLNATLLKNG--SSLY------IT-AVQPEDSATYFCAVD-
-----
>V63RF-ADFV01192035.1-trav |(102005, 102299)|2.97195641525|(0.994,1.000,0.979)|1
-GINGDSVVQTEGQVLLSEGDSLIVNCSYETT-----QY-PSLFWYVQYPGEGPQLLLKA
MKA---ND---K---GRNKGFEATYHKETTSFHLE------KD-SVQEADSAVYFCALS-
-----
>V64RF-ADFV01192037.1-trav |(3179, 3470)|2.88580286128|(0.976,0.928,0.992)|1
-GSCKNQVEQSPQSLIILEGKNCTLQCNYTVS-----PF-NNLRWYKQDTGKGPVSLTIM
TLS---EN--TK----SNGRYTATLDADTKQSSLH------IT-ASQLSDSASYICVV--
-----
>V65RF-ADFV01192037.1-trav |(20251, 20539)|2.95672492248|(0.994,0.966,1.000)|1
VWSQRKEVEQDPGPFNVPEGATVAFNCTYSNS-----VS-QSFFWYRQDCRKEPKLLMSV
YSS---G---N-----EDGRFTAQLNRASQYIYLL------IR-DSQLSDSATYLCAV--
-----
>V66RF-ADFV01192037.1-trav |(26000, 26297)|2.98061205453|(0.998,0.994,0.989)|1
-GTRAQSVTQLDSHVSVSEGTPVLLRCNYSSS-----YS-PSLFWYVQYPNQGLQLLLKY
TSG---TT--LV---KGINGFEAEFKKSETSFHLT------KS-SAHVSDAAEYFCAVS-
-----
>V67RF-ADFV01192037.1-trav |(31699, 31996)|2.61020997727|(0.983,0.835,0.902)|1
-TARAQSVTQPDIHITVSEGASLELRCNYSYG-----AT-PSLFWYVQSPGRGLQLLLKY
FSG---DT--LV---QGIKGFEAEFQRSQSSFNLR------KP-SVHWSDAAEYFCAVS-
-----
>V69RF-ADFV01192038.1-trav |(22028, 22319)|2.94428190752|(0.999,0.955,0.998)|1
VWSQQKEVEQNSGPLSDPEGAIASLNCTYSDR-----SS-QSFFWYRQYSGKSPELITSI
YSN---GD--K-----EDGRFTAQLNKASQYVSLL------IR-DSQLSDSATYLCAV--
-----
>V70RF-ADFV01192038.1-trav |(28540, 28837)|2.94271942965|(0.995,0.970,0.981)|1
-GTRAQSVTQLDSHVSVSEGTLVLLRCNYSSS-----VS-PNLFWYVQYPNQGLQLLLKY
ISG---TT--LV---KGINGFEAEFKKSETSFHLT------KP-SAHVSDAAEYFCAVS-
-----
>V71RF-ADFV01192038.1-trav |(50418, 50711)|2.95626365316|(0.994,0.968,0.997)|1
-VSRGESVGLHLPTLSVQEGNNSVINCAYSDS-----AS-DYFTWYKQESGKGPQFIIDI
RSN---MD--KR----QGQRVTVLLNKTVKHLSLQ------IA-ATQPGDSAVYFCAEN-
-----
>V72RF-ADFV01192039.1-trav |(5009, 5312)|2.96353206285|(0.989,0.980,0.995)|1
-PGIAQKIIQTQPAMFVQEKEAVTLDCTYDTS-----DQSYGLFWYKQPSSGEMIFLISQ
ASY---DK--QN---ATEGRYSLNFQKARKSANLV------IS-ASQLGDSAKYFCAMRE
-----
>V73RF-ADFV01192039.1-trav |(24309, 24603)|2.97950008499|(0.995,0.985,1.000)|1
-RTHGDSVTQMEGPVTLSEEAFLTINCTYTAT-----GY-PTLFWYVQYPGEGPQLLLKA
TRA---DD---K---GSNKGFEATYRKETTSFHLE------KD-SVQESDSAVYFCALS-
-----
>V74RF-ADFV01192039.1-trav |(50026, 50319)|2.92460484445|(0.971,0.989,0.966)|1
VWCQQKEVEQNPGPLSVPEGAIASLNCTYSNS-----AF-QYFMWYRQYSRKGPELLMYT
YSS---GN--K-----EDGRFTAQVDKSSKCISLF------IR-NSQPSDSATYLCAMS-
-----
>V76RF-ADFV01192039.1-trav |(82783, 83070)|2.89863412726|(0.990,0.932,0.990)|1
--VNSQQGEEDPQALTIQEGENATMNCSYKSS------T-NSLQWYRQESGRGLVHLILI
RSN---ER--EK----HSGRLRVTLDTSKKSSSLL------IT-ASRAADTASYFCAME-
-----
>V77RF-ADFV01192039.1-trav |(88347, 88638)|2.96653206285|(0.994,0.985,0.988)|1
-RTNGDSVTQTEGPVTLPEQAALTLNCTYQSS-----YS-TFLFWYVQYLNKAPELLLKS
S-E---NQ---E---TDSRGFQASHVKSDSSFHLE------KP-SVQLSDSAVYYCALR-
-----
>V78RF-ADFV01192039.1-trdv |(91529, 91832)|2.55416846199|(0.957,0.855,0.838)|1
-SSMTQKVTQAQTEISVVEKEDVTLDCVYESR-----DTTYYLFWYKQLPSGELVFLIRQ
NSF---NE--QN---EINGRYSWNFQKSTSSFNLT------IT-ASQVMDSAVYFCALND
-----
>V86RF-ADFV01192042.1-trav |(56528, 56818)|2.89432022844|(0.969,0.970,0.956)|1
--TIIDAKTTQPTSMDCAEGRAANLPCNHSTI-----SGNEYVYWYRQIHSQGPQYIIHG
LKN---NA--TN----EM--ASLIITEDRKSSTLI------LP-HATLRDTAVYYCIVRV
-----
>V91RF-ADFV01192045.1-trav |(29460, 29750)|2.68118382946|(0.893,0.956,0.854)|1
-VSSEDKVVQSPLSLVVHEGDTVTLNCSYEVT-----NF-RSLLWYKQEK-KAPTFLFML
TSS---GI--EK----KSGRLSGILDNRELFSILN------IT-ATETRDSAIYLCAVE-
-----
>V93RF-ADFV01192049.1-trav |(9724, 10024)|2.95870048487|(0.995,0.980,0.985)|1
-FSMAQTVTQSQPEMSVQEAETVTLSCTYDTT-----ESDYYLFWYKQPPSRQMILIIRQ
EAY---KQ--QN---ATENRFSVNFQKAAKSFSLK------IS-DSQLGDTAMYFCAYR-
-----
>V94RF-ADFV01192050.1-trav |(14951, 15239)|2.92225114014|(0.980,0.950,0.997)|1
-LSGELKVGQNPPFLSTQEGKNYTIYCNYSTI-----S--DRLYWYRQDPGKSLESLFVL
LSS---GA--VK----QEGRLMASLDTKARLSTLH------IT-AAVHDLSATYFCAV--
-----
>V96RF-ADFV01046571.1-trgv |(4061, 4374)|2.94042463332|(0.980,0.995,0.967)|-1
-SQKSSNLEGRTKSVTRPTGSSAEITCDLTVT-----DT-FYIHWYLHQEGKAPQRLLYY
DVS---DSRDVLESGLSQVKYYTHTP-RRWSWILI------LR-NLIENDSGVYYCASWG
-----
>V102RF-ADFV01106214.1-igkv |(102002, 102302)|2.99899600001|(1.000,1.000,0.999)|-1
-ARCDIQMTQSPSSLSASVGDSVTITCRASQGIS------NWLAWYQQKPGKAPKLLIYK
A---------SSLQSGIPSRFSGSG--SGTTYTLT------IS-SLQPEDFATYYCQQSY
STP--
>V103RF-ADFV01131933.1-ighv |(14064, 14373)|2.96830128432|(0.995,0.975,1.000)|-1
-AHSQVQLVQ-SGAEVKKPGASVKVSCKASGYT-F---TSYNMYWVRQAPGQGLEWMGVI
NPS--SGG--TSYAQKFQGRVTMTRDTSISTAYME------LS-SLRSEDTATYYCAR--
-----
>V104RF-ADFV01131938.1-ighv |(1713, 2022)|2.81919856051|(0.954,0.959,0.913)|-1
-AHSQVQLVQ-SGAEVKKPGTSVKVSCKASGYT-F---TSYAMNWARQAPGQRLEWMGWI
NTN--TGN--PTYAQGFKERFVFSMDTSVSTAYLQ------IS-SLKAEDTAVYYCAR--
-----
>V105RF-ADFV01131939.1-ighv |(1427, 1736)|2.81919856051|(0.954,0.959,0.913)|-1
-AHSQVQLVQ-SGAEVKKPGTSVKVSCKASGYT-F---TSYAMNWARQAPGQRLEWMGWI
NTN--TGN--PTYAQGFKERFVFSMDTSVSTAYLQ------IS-SLKAEDTAVYYCAR--
-----
>V106RF-ADFV01131940.1-ighv |(4183, 4492)|3.0|(1.000,1.000,1.000)|-1
-VQCDVQLVE-SGGGLAQPGGSLRLSCAASGFT-F---SNYYMSWVRQAPGKGLEWVSYI
SGD--SSY--IYYADSVKGRFTISRDNAKNSLYLQ------MN-SLRAEDTAVYYCTR--
-----
>V109RF-ADFV01131944.1-ighv |(5787, 6101)|2.99698000014|(1.000,0.999,0.998)|-1
-VQCAVQLVE-SGGGLVQPGGSLRLSCAASGFT-F---SDYYMSWVRQAPGKGLEWVAVI
RNKANGGT--TEYAASVKGRFTISRDDSKSIAYLQ------MN-SLKTEDTAVYYCAE--
-----
>V110RF-ADFV01131946.1-ighv |(2041, 2350)|2.95966884009|(0.992,0.995,0.974)|-1
-AHSEVQLVQ-SGAEVKKPGATVKISCKVSGYT-F---TSYYMHWVQQAPGKGLEWMGGV
DPE--GGE--TIYAEKFQGRVTITADTSTDTAYME------LS-SLRSEDTAVYYCAR--
-----
>V112RF-ADFV01131950.1-ighv |(11086, 11386)|3.0|(1.000,1.000,1.000)|-1
--QCEVQLVE-SGGSLVQPGGSLRLSCAASGFT-F---SDYYMHWVRQAPGKGLEWVSEI
TN----SS--TYYADSVKGRFTISRDNAKNTLYLQ------MN-SLRAEDTAVYYCAK--
-----
>V113RF-ADFV01131950.1-ighv |(21617, 21923)|2.99496000066|(0.997,1.000,0.998)|-1
-VLSQVQLQE-SGPGLVKPSETLSLTCAVSGGS-IS---GYYWSWIRQPPGKGLEWIGYI
YS---SGS--TNYNPSLKSRVTMSVDTSKNQFSLK------LS-SVTAEDTAVYYCAR--
-----
>V114RF-ADFV01131951.1-ighv |(9601, 9910)|2.99899600001|(1.000,0.999,1.000)|-1
-VQCEVQLVE-SGGGLVQPGGSLRLSCAASGFT-F---SSYDMNWVRQAPGKGLEWVSYI
SSG--GGT--IYYADSVKGRFTISRDNAKNSLYLQ------MN-SLRAEDTAVYYCAK--
-----
>V116RF-ADFV01131954.1-ighv |(4903, 5218)|2.99899600001|(1.000,1.000,0.999)|-1
-VQCEVQLVE-SGGGLVQPGGSLRLSCAASGFT-F---SDYAMSWVRQAPGKGLEWVGFI
RSKAYGGT--TEYAASVKGRFTISRDDSKSVAYLQ------MN-SLKTEDTAVYYCTR--
-----
>V117RF-ADFV01131956.1-ighv |(7476, 7785)|3.0|(1.000,1.000,1.000)|-1
-VQCEVQLVE-SGGGLVQPGASLKLSCAASGFT-F---SSYGMHWVRQAPGKGLEWVSSI
ST--SSSY--IYYADSVKGRFTISRDNSKNTLYLQ------MN-SLRAEDTAVYYCAR--
-----
>V120RF-ADFV01131958.1-ighv |(4025, 4334)|2.97953608204|(0.998,0.988,0.994)|-1
-AHSQVQLVQ-SGPEVKKPGASVKVSCKASGYT-F---TSSAMQWVRQAPGQGLEWMGWI
IVG--NGN--TNYAQKFQGRVTITRDTSTSTAYME------LS-SLRSEDTAVYYCAT--
-----
>V121RF-ADFV01131959.1-ighv |(269, 578)|2.84227949387|(0.997,0.958,0.918)|-1
-AHSEVQLVQ-SGAEVKKPGATVKISCKASGYT-F---TSSYMHWVQQAPGKGLEWMGRV
DPE--DGE--TKYAEKFQGRVTITADTSTDTAYME------LS-SLRSEDTAVYYCAT--
-----
>V122RF-ADFV01131961.1-ighv |(38, 353)|3.0|(1.000,1.000,1.000)|-1
-VQCEVQLVE-SGGGLVQPGGSLRLSCAASGFT-F---SNYWMHSVRQAPGKGLEWVGRI
KNKADGGT--AEYAASVKGRFTISRDDSKNTLYLQ------MN-SLKTEDTAVYYCTR--
-----
>V125RF-ADFV01131961.1-ighv |(37937, 38246)|3.0|(1.000,1.000,1.000)|-1
-VQCEVQLVE-SGGGLVQPGGSLRLSCAASGFT-F---SSYGMNWVRQAPGKGLEWVSYI
SSG--GGT--IYYADSVKGRFTISRDNAKNSLYLQ------MN-SLRAEDTAVYYCTR--
-----
>V131RF-ADFV01132918.1-iglv |(49559, 49868)|2.89892102226|(0.942,0.976,0.998)|-1
-SWAQSVLTQ-PPSVSGTPGQRVTISCSGSSS---NIG-SNNVHWDQQLPGTAPKLLIYY
N---------DQRPSGVPDRFSGSK--SGTSASLA------IT-GLRSEDEADYYCEAWD
DSLSG
>V132RF-ADFV01132961.1-igkv |(18470, 18770)|2.97568883957|(0.999,0.981,0.997)|-1
-ARCDIQMTQSPSSLSVSVGDRVTITCRASQGIS------NELAWYQQKPGQAPMLLIYA
A---------SSLQTGVPSRFSGSG--SGTDYTLT------IS-SLQPEDVATYYCLQDY
TTP--
>V135RF-ADFV01132961.1-igkv |(93218, 93536)|2.89034245428|(0.979,0.931,0.990)|-1
-STGDIVMTQTPLFLSITLGEPASISCRSSQSLFYSDDQNIYLDWYLQKPGQSPQLLIYF
V---------SYRASGVPDRFSGSG--SGTDFILK------IS-RLEAEDVGVYYCMQRI
EFP--
>V136RF-ADFV01132961.1-igkv |(104510, 104810)|2.98880001921|(0.999,0.998,0.992)|-1
-ARCDMQMTQSPSSLSASVGDTVTITCRASQSIS------SYLNWYQQKPGKIPKLLIYA
A---------STLQSGVPSRFSGSG--SGTDFTVT------IS-SVQPEDFATYYCQHGY
GTP--
>V137RF-ADFV01132961.1-igkv |(146778, 147093)|2.98575601537|(0.999,0.993,0.994)|-1
-SSGDIVMTQTPLSLSITPGEPASISCRSSQSLRYS-DGNTYLYWYLQKPGQSPQLLIYR
V---------SNRFSGVPDRFSGSG--SGTDFTLK------IS-RVEAEDVGVYYCMQDL
QAP--
>V138RF-ADFV01132961.1-igkv |(157570, 157870)|2.9599362071|(0.973,0.994,0.997)|-1
-ARCAIQMTQSPSSLSASVGDRVTITCRTSQGIS------NWIAWYQQKPGKAPKHLIYG
A---------SNLQTGVPSRFSESG--SGTDYTLT------VS-SLQPEDSTTYYCQQYD
IFP--
>V140RF-ADFV01132961.1-igkv |(188116, 188416)|2.97087023728|(0.998,1.000,0.975)|-1
-IRCAIQMTQSPSSLSASVGDRVTITCRASQGIS------NYLNWYQQKPGKAPKLLIYR
A---------SSLETGVPSRFSGSG--SGTDFALT------IS-SLQPEDIATYYCLQYD
NLP--
>V142RF-ADFV01132961.1-igkv |(225521, 225836)|2.73606956251|(0.975,0.892,0.912)|-1
-SSGDIVMTQTPLSLSITPGEPASISCRSSQSLRHS-NGYTYLDWYLQKPGQSPQLLIYL
G---------SNRASGVPDRFSGSG--SGTDFTLK------IS-RVEAEDVGIYYCMQGI
QLP--
>V144RF-ADFV01132961.1-igkv |(246969, 247267)|2.95897652411|(0.992,0.992,0.976)|-1
-TRCDIQMTQSPSSLSASVGDRVTITCRASQSIS------KWLAWYQQKPGKVPKLLIYA
A---------STLQSGVPSRLSGSG--SGTDFTLT------IS-SLQPEDVATYYCQKHD
SA---
>V146RF-ADFV01143437.1-ighv |(651, 966)|2.99799600001|(0.999,1.000,0.999)|-1
-VQCEVQLVE-SGGSLVQPGGSLRLSCAASGFT-F---SDYYMHWVRQAPGKGLEWVGRI
KNKAGGGT--AEYAASVKGRFTISRDDSKNTLYLQ------MN-SLKTEDTAVYYCTR--
-----
>V148RF-ADFV01192057.1-trdv |(25030, 25336)|2.45590837717|(0.809,0.841,0.810)|-1
RGMLCDKVTQSSPDQTVASGSEVVLLCTYDTV-----YSNPDLFWFRIRPDYSFQFVFYG
DDS---RS--QA-ADFTQGRFSVKHILTQKAFHLV------IS-PVRIEDSATYYCAL--
-----
>V1RF-AJFE01003265.1-ighv |(14098, 14407)|2.98894800078|(0.996,0.994,0.999)|1
-VQCEVQLVE-SGGGLVQPGGSLRLSCAASGFT-F---SSYWMHWVRQAPGKGLVWVSRI
NS--DGSS--TSYADSLKGQFTISRDNAKNTLYLQ------MN-SLRAEDMAVYYCTR--
-----
>V3RF-AJFE01011110.1-ighv |(45852, 46161)|3.0|(1.000,1.000,1.000)|1
-VQCEVQLLE-SGGGLVQPGGSLRLSCAASGFT-F---SSYWMHWVRQAPGKGLEWVSRI
NS--DGSS--TSYADSVKGRFTISRDNAKNTLYLQ------MN-SLRAEDTAVYYCTR--
-----
>V4RF-AJFE01011110.1-ighv |(53572, 53887)|2.99899600001|(1.000,1.000,0.999)|1
-VQCEVQLVE-SGGGLVQPGGSLRLSCAASGFT-F---SGSAMHWVRQASGKGLEWVGRI
RSKANSYA--TAYAASVKGRFTISRDDSKNKAYLQ------MN-SLKTEDTAVYYCTT--
-----
>V6RF-AJFE01011113.1-ighv |(30008, 30314)|3.0|(1.000,1.000,1.000)|1
-VQCEVQLVE-SGGGLVQPGGSLRLSCAASGFT-F---SSYAMHWVRQAPGKGLEWVSLI
YS--G-DS--TYYADSVKGRFTISRDNSKNTLYLQ------MG-SLRAEDTAVYYCAR--
-----
>V7RF-AJFE01011588.1-igkv |(6066, 6365)|2.99496000066|(0.999,1.000,0.996)|1
-ARCDIQVTQSPSSLSASVGDRVTITCRASQGIS------NGLSWYQQKPGQAPTLLIYA
A---------SSLQSGIPSRFSGSG--SGTDFTLT------IS-SLQPEDVATYYCLQDY
TTH--
>V9RF-AJFE01012232.1-igkv |(670, 988)|2.70831013128|(0.989,0.827,0.992)|1
-SSGDIVMTQAPLSLPITPGEPASISCRSSQSLLDSDDGNTYLDWYLQKPGQSPQLLIYT
L---------SYRASGVPDRFSGSG--SGTDFTLK------IS-RVEAEDVGVYYCMQHI
EFP--
>V10RF-AJFE01012232.1-igkv |(11186, 11479)|2.99696400065|(1.000,1.000,0.997)|1
-ARCDIQMTQSPSSLSASVGDRVTITCRASQSIS------NYLSWYQQKPGKAPKLLIYY
A---------STLQSGVPSRFSGSG--SGTDFTLT------IS-SLQPEDFATYYCQHGY
G----
>V11RF-AJFE01012232.1-igkv |(33464, 33764)|2.99174403277|(1.000,0.992,1.000)|1
-ARCDIQLTQSPSSLSASVGDRVTITCRASQGIS------SYLNWYQQKPGKVPKLLIYS
A---------SNLQSGVPSRFSGSG--SGTDFTLT------IS-SLQPEDVATYYCQRTY
NAP--
>V12RF-AJFE01012232.1-igkv |(62717, 63017)|2.99385601037|(1.000,0.994,1.000)|1
-ARCDIRMTQSPSSLSASVGDRVTITCQASQDIS------NYLNWYQQKPGKAPKLLIYD
A---------SNLETGVPSRFSGSG--SGTDFTFT------IS-SLQPEDIATYYCQQYD
NLP--
>V14RF-AJFE01012234.1-igkv |(16459, 16774)|2.94790741148|(0.997,0.989,0.966)|1
-SSADIVMTQTPLSLSVTPGQPASISCKSSQSLLHS-DGNTYLYWYLQKPGQSPQLLIYR
V---------SNRASGVPDRFSGSG--SGTDFTLK------IS-RVEAEDVGVYYCMQGI
QLP--
>V15RF-AJFE01012234.1-igkv |(28936, 29251)|2.71240530194|(0.994,0.827,0.997)|1
-SSGDIVMTQSPLSLPVTPGEPASISCRSSQSLLHS-NRYNYLDWYLQKPGQSPQLLIYL
G---------SNRASGVPDRFSGSG--SGTDFTLK------IS-RVEAEDVGVYYCMQAL
QTP--
>V16RF-AJFE01012235.1-igkv |(6765, 7067)|2.982900005|(0.996,0.996,0.991)|1
-SSGDIVMTQTPLSSPVTLGQPASISCRSSQSLVHS-DGNTYLSWLQQRPGQPPRLLIYK
V---------SNRFSGVPDRFSGSG--AGTDFTLK------IS-RVEAEDVGVYYCTQA-
-----
>V18RF-AJFE01012236.1-igkv |(7268, 7564)|2.94937470465|(0.989,0.965,0.998)|1
-TTGEIVLMQSSATLSLSPGERATLSCRASQSVS-----SSYLAWYQQKPGQAPRLLIYD
A---------STRATGIPDRFSGSG--SGTDFTLT------IS-RLEPEDFAVYYCQQYG
S----
>V21RF-AJFE01012238.1-igkv |(29982, 30282)|2.98880001921|(0.999,0.992,0.998)|1
-ARCDIQMTQSPSSLSASVGDRVTITCRASQGIS------NYLAWFQQKPGKVPKRLIYA
A---------SSLQSGVPSRFSGSG--SGTEFTLT------IS-SLQPEDFATYYCLQHN
SYP--
>V23RF-AJFE01012245.1-igkv |(2610, 2910)|2.99280401921|(1.000,0.993,1.000)|1
-ARCAIQLTQSPSSLSASVGDRVTITCRASQGIS------NRLNWYQQKPGKAPKLLIYD
A---------SSLESGVPSRFSGSG--SGTDFTLT------IS-SLQPEDFATYYCQQFN
SYP--
>V24RF-AJFE01012249.1-igkv |(2485, 2785)|2.98341612211|(1.000,0.989,0.995)|1
-TTREIVLTQSPATLSLSPGEKATLSCRASQSVS------SYLAWYQQKPGQAPRLLIYD
A---------SNRATGIPARFSGSG--SGTDFTLT------IS-SLEPEDFAVYYCQQRS
NWH--
>V26RF-AJFE01024273.1-trdv |(100475, 100781)|2.92402032645|(0.982,0.968,0.975)|1
RGMLCDKVTQSSPDQTVASGSEVVLLCTYDAV-----YSNPDLFWYRIRPDYSFQFVFYG
DNS---RS--QA-ADFTQGRFSVKHILTQKAFHLV------IS-PVRTEDSATYYCAF--
-----
>V27RF-AJFE01038664.1-trgv |(28742, 29055)|2.85973801777|(0.997,0.940,0.946)|1
-SQKSSNLEGRTKSVTRETRSSAEITCDLTVT-----NT-FYIHWYLHQEGKAPQRLLYY
DVS---TARDVLESGLSPGKYYTHTP-RRWSWILR------LQ-NLIENDSGVYYCATWD
-----
>V28RF-AJFE01038665.1-trgv |(1085, 1398)|2.95870048487|(0.995,0.980,0.985)|1
-SQKSSNLEGRTKSVIRQTGSSAEITCDLDGG-----ST-GYIHWYLHQEGKAPQRLLYY
DSY---TSRVVLESGISPGKYDTYGST-RKNLRLI------LR-NLIENDSGVYYCATWD
-----
>V29RF-AJFE01038666.1-trgv |(1901, 2214)|2.92690924071|(0.999,0.983,0.954)|1
-SQKSSNLEGRMKSVTRPTGSSAEITCDLTVI-----NA-VYIHWYLHQEGKSPQRLLYY
DVS---NSRDVLESGLSPGKYYTHTP-RRWSWILR------LQ-NLIENDSGVYYCATWD
-----
>V33RF-AJFE01039607.1-trbv |(117721, 118021)|2.82020368021|(0.974,0.992,0.886)|1
--LTEPEVTQTPSHQVTQMGQEVILRCVPISN-------HLYFYWYRQILGQKVEFLVSF
YNN---EI--SEKSEIFDDQFSVERPD-GSNFTLK------IW-STKLEDSAMYFCASSE
-----
>V34RF-AJFE01039607.1-trbv |(129949, 130246)|2.94591237717|(0.994,0.994,0.962)|1
--PIDTEVTQTPKHLVMGMTNKKSLKCEQHMG-------HRAMYWYKQKAKKPPELMFVY
SYE---KL--SINES-VPSRFSPECPN-SSLLNLH------LH-ALQPEDSALYLCASSQ
-----
>V35RF-AJFE01039607.1-trbv |(137829, 138125)|2.92993047006|(0.992,0.953,0.991)|1
--PVEAGVTQTPRYLIKARGQQVTLSCSPISG-------HRSVSWYQQTPGQGLQFLFEY
FSE---TQ--RNKG-NFPGRFSGRQFS-NSRSEMN------VS-TLELGDSALYLCASSL
-----
>V36RF-AJFE01039608.1-trbv |(1218, 1515)|2.99593600205|(1.000,1.000,0.996)|1
--PVNAGVTQTPKFQVLKTGQSMTLQCAQDMN-------HNSMYWYRQDPGMGLRLIYYS
VGE---GT--TDKGE-VPDGYNVSRLN-KREFSLR------LE-SAAPSQTSVYFCASSE
-----
>V37RF-AJFE01039609.1-trbv |(5245, 5558)|2.88794173299|(0.996,0.998,0.918)|1
--PMEMGVTQTPRHLVMGMTNKKSLKCEQHLG-------HNAMYWYKQSAKKPLELMFVY
NFK---EQ--TENNS-VPSRFSPECPN-SSHLFLH------LH-ALQPEDSALYLCASSQ
DTALQ
>V40RF-AJFE01045037.1-ighv |(4711, 5020)|2.82685164207|(0.970,0.895,0.985)|1
-THAQVQLVQ-SGAEVKKPGATVKISCKASGYT-L---TELSMHWVRQAPGKGLEWMGGF
DPE--DGE--TIYAQKFQGRVTMTEDTSTDTAYME------LS-SLRSEDTAVYYCAT--
-----
>V41RF-AJFE01045037.1-ighv |(12790, 13099)|2.99085601037|(0.999,0.993,0.999)|1
-VQCEVQLVE-SGGGLVKPGGSLRLSCAASGFT-F---SNYYMHWVRQAPEKGLEWVSTI
SG--SGGS--TWYPDSVKGRFTISRDNSKNTLYLQ------MN-SLRAEDTAVYYCAR--
-----
>V42RF-AJFE01045037.1-ighv |(23646, 23958)|2.98867205249|(0.999,1.000,0.990)|1
-VQCEVQLVE-SGGGLVKPGGSLRLSCAASGFT-F---SSYSMNWVRQAPGKGLEWVAYI
SSP-SGSS--TYYADSVKGRFTISRDNSKNTLYLQ------MN-SLRAEDTAVYYCAR--
-----
>V43RF-AJFE01045041.1-ighv |(1266, 1575)|2.99799600001|(0.999,1.000,0.999)|1
-VQCEVQLVE-SGGALVKPGGSLRLSCAASGFT-F---SSYGMHWVRQAPGKGLEWVSYI
SYD--SSY--IYYADSVKGRFTISRDNAKNSLYLQ------MN-SLRAEDTAVYYCAR--
-----
>V44RF-AJFE01045048.1-ighv |(1386, 1695)|2.99593600205|(1.000,1.000,0.996)|1
-VQCEVQLVE-SGGGLVQPGGSLRLSCAASGFT-F---DDYGMSWVRQAPGKGLEWVSLI
SW--DGGS--TYYADSVKGRFTISRDNSKNSLYLQ------MN-SLRAEDTALYYCAR--
-----
>V45RF-AJFE01045051.1-ighv |(2850, 3156)|2.98470402421|(0.999,0.992,0.994)|1
-VLSQLQLQE-SGPGLVKPSETLSLTCTVSGGS-I---SSYYWSWIRQPPGKGLEWIGNI
YY---SGS--AYYNPSLKSRVTISVDTSKNQFSLK------LS-SVTAADTAVYYCAR--
-----
>V46RF-AJFE01045051.1-ighv |(17267, 17573)|3.0|(1.000,1.000,1.000)|1
-VQCEVQLVE-SGGGLVQPGGSLRLSCAASGFT-V---SSYHMSWVRQAPGKGLEWVSVI
YS--G-GS--TYYADSVKGRFTISRDNSKNTLYLQ------MN-SLRAEDTAVYYCAR--
-----
>V48RF-AJFE01045051.1-ighv |(52919, 53234)|2.99594800078|(0.997,0.999,1.000)|1
-VQCEVQLVE-SGGGLVQPGRSLRLSCTASGFT-F---GDYAMSWIRQAPGKGLEWVGFI
RSKAYGGT--TEYAASVKGRFTISRDDSKSIAYLQ------MN-GLKTEDTAVYYCTR--
-----
>V50RF-AJFE01045051.1-ighv |(75870, 76179)|2.9774040992|(0.987,0.997,0.994)|1
-AHSQVQLVQ-SGAEVKKPGASVKVSCKASGYT-F---TSYTISWLRQAPGQGLEWMGVI
SPS--DGS--TSYAQKFQGRVTMTRDTSTSTVYME------LS-SLRSEDTAVYYCAR--
-----
>V51RF-AJFE01045051.1-ighv |(79995, 80304)|2.98896000066|(0.997,0.998,0.994)|1
-AYSQMQLVQ-SGAEVKKPGSSVKVSCKASGYT-F---TYRYLHWVRQAPGQALEWMGWI
TPY--NGN--TNYAQKFQDRVTITRDRSMSTAYME------LR-SLRSEDSAVYYCAR--
-----
>V55RF-AJFE01069975.1-trav |(15309, 15599)|2.99498000014|(0.998,0.997,1.000)|1
-MTRGEDVEQSL-FLSVREGDSSVINCTYTDS-----SS-TYLYWYKQEPGAGLQLLTYI
FSN---MD--MK----QDQRLTVLLNKKDKHLSLR------IA-DTQTGDSAIYFCAES-
-----
>V56RF-AJFE01069975.1-trav |(34873, 35161)|2.98793200206|(0.995,0.999,0.994)|1
--VKSQKIEQNSEALNIQEGKTATLTCNYTNY-----SP-AYLQWYRQDPGRGPVFLLLI
REN---EK--EK----RKERLKVTFDTTLKQGVFH------IT-ASQPADSATYLCAL--
-----
>V57RF-AJFE01069975.1-trav |(49199, 49486)|2.95767605248|(0.983,0.983,0.992)|1
-ANGENQVEHSPHFLGPQQGDVASMSCTYSVS-----RF-NNLQWYRQNTGMGPKHLLSM
YSA---GY--EK----QKGRLNAILLKNG--SSLY------IT-AVQPEDSATYFCAVD-
-----
>V59RF-AJFE01069975.1-trav |(77622, 77916)|2.98657605748|(0.991,0.996,1.000)|1
-GINGDSVVQTEGQVLLSEGDSLIVNCSYETT-----QY-PSLLWYVLYPGEGPQLLLKA
MKA---ND---N---GRNKGFEATYRKETTSFHLE------KD-SVQESDSAVYFCALS-
-----
>V60RF-AJFE01069975.1-trav |(91696, 91989)|2.98960803841|(0.992,0.999,0.999)|1
-GSGKNQVEQSPQSLIILEGKNCTLQCNYTVS-----PF-NNLRWYKQDTGRGPVSLTIM
TFS---EN--TK----SNGRYTATLDADTKKSSLH------IT-ASQLSDSASYICVVS-
-----
>V61RF-AJFE01069975.1-trav |(107426, 107714)|2.99593600205|(1.000,0.996,1.000)|1
VWSQRKEVEQDPGPFNVPEGATVAFNCTYSNS-----AS-QSFFWYRQDCRKEPKLLMSV
YSS---G---N-----EDGRFTAQLNRASQYISLL------IR-DSKLSDSATYLCAV--
-----
>V62RF-AJFE01069975.1-trav |(118638, 118935)|2.95328751647|(1.000,0.980,0.977)|1
-TVRAQSVTQPDIHITVSEGASLELRCNYSYG-----AT-PSLFWYVQSPGQGLQLLLKY
FSG---DT--LV---QGIKGFEAEFKRSQSSFNLR------KP-SVHWSDAAEYFCAVG-
-----
>V63RF-AJFE01069975.1-trav |(134910, 135200)|2.97780401921|(0.995,0.995,0.988)|1
--VNGENVEQHPSTLSVQEGDGAVIKCTYSDS-----AS-NYFPWYKQELGKGPQLIIDI
RSN---MG--EK----KDQRIAVTLNKTAKHFSLH------IT-ETQPEDSAVYFCAAS-
-----
>V64RF-AJFE01069975.1-trav |(154372, 154663)|2.99089600501|(0.999,0.998,0.994)|1
VWSQQKEVEQNSGPLSVPEGAIASLNCTYSDR-----RS-QSFFWYRQYSGKSPELIMSI
YSN---GD--E-----EDGRFTAQLNKASQYVSLL------IR-DSQPSDSATYLCAV--
-----
>V65RF-AJFE01069975.1-trav |(160863, 161160)|2.96496800026|(0.987,0.989,0.989)|1
-GTRAQSATQLDSHVSVSEGALVLLRCNYSSS-----VP-PYLFWYVQYPNQGLQLLLKY
TTG---AT--LV---KGINGFEAEFKKSETSFHLT------KP-SAHVNDAAEYFCAVS-
-----
>V66RF-AJFE01069976.1-trav |(18238, 18531)|2.98899600001|(0.996,0.996,0.997)|1
-VSRGESVGLHLPTLSVQEGDNSIINCAYSNS-----AS-DYFIWYKQESGKGPQFIIDI
RSN---MD--KR----QGQRVTVLLNKTVKHLSLQ------IA-ATQPGDSAVYFCAEN-
-----
>V67RF-AJFE01069976.1-trav |(24122, 24425)|2.99289600501|(0.999,0.994,1.000)|1
-PGIAQKITQTQPGMFVQEKEAVTLDCTYDTS-----DPSYGLFWYKQPSSGEMIFLIYQ
GSY---DQ--QN---ATEGRYSLNFQKARKSANLV------IS-ASQLGDSAMYFCAVRE
-----
>V68RF-AJFE01069976.1-trav |(40935, 41229)|3.0|(1.000,1.000,1.000)|1
-RTRGDSVTQMEGPVTLSEEAFLTINCTYTAT-----GY-PSLFWYVQYPGEGLQLLLKA
TKA---DD---K---GSNKGFEATYRKETTSFHLE------KD-SVQASDSAVYFCALS-
-----
>V69RF-AJFE01069976.1-trav |(65330, 65623)|2.98996000066|(0.996,0.999,0.995)|1
VWSQQKEVEQDPGPLSVPEGAIASLNCTYSNS-----AF-QYFMWYRQYSRKGPELLMYT
YSS---GN--K-----EDGRFIAQVDTSSKYISLF------IR-DSQPSDSATYLCAMS-
-----
>V71RF-AJFE01069976.1-trav |(97788, 98075)|2.99385601037|(1.000,0.994,1.000)|1
--VNSQQGEEDPQALSIQEGENAIMNCSYKTS------I-NNLQWYRQNSGRGLVHLILI
RSN---ER--EK----HSGRLRVTLDTSKKSSSLL------IT-ASRAADTASYFCATD-
-----
>V72RF-AJFE01069976.1-trdv |(107857, 108160)|2.97580001921|(0.990,0.997,0.989)|1
-SSMAQKVTQAQTEISVVEKEDVTLDCVYETR-----DTTYYLFWYKQPPSGELVFLIRR
NSF---DE--QN---EISGRYSWNFQKSTSSFNFT------IT-ASQVVDSAVYFCALSE
-----
>V73RF-AJFE01069977.1-trav |(1078, 1365)|2.98696000066|(0.997,0.996,0.994)|1
-LSGEDQVTQSPEALRLQEGESSSLNCSYTVS-----GL-RGLFWYRQDPGKGPEFLFTL
YSA---GE--EK----EKERLKATLTKKE--SFLH------IT-APKPEDSATYLCAVQ-
-----
>V80RF-AJFE01104359.1-trbv |(36551, 36842)|2.95080401921|(0.986,0.979,0.986)|1
--LMEAEIYQTPRHRVIGTGKKITLECSQTMG-------HDKMYWSRSRNGITPHPPFLW
--V---NS--TEKGD-LSSESTVSRIR-IERFPLT------LE-SASPSHTSQYLCASSE
-----
>V81RF-AJFE01104369.1-trbv |(8636, 8939)|2.97559608|(0.995,0.985,0.996)|1
-SVFSAVISQKPSRDICQRGTSMTIQCQVDSQ-------VTMMFWYCQQPGQSMTLIATA
NQG--SEA--TYESRFVIDKFPISRPN-LTFSTLT------VS-NRRPEDSSIYLCSVE-
-----
>V83RF-AJFE01002289.1-igkv |(593, 893)|2.99067605248|(1.000,0.991,1.000)|-1
-ARCDIQMTQSPSSLSASVGDRVTITCRASQGIR------NDLGWYQQKPGKAPKLLIYA
A---------SSLQSGVPSRFSGSG--SGTDFTLT------IS-SLQPEDFATYYCLQDY
NYP--
>V84RF-AJFE01002352.1-igkv |(655, 955)|2.97795641525|(1.000,0.994,0.985)|-1
-ARCAIRMTQSPSSLSASTGDRVTITCRASQGIS------SYLAWYQQKPGKAPKLLIYA
A---------STLQSGVPSRFSGSG--SGTEFTLT------IS-CLQSEDFATYYCQQYY
SYP--
>V87RF-AJFE01010527.1-trav |(11555, 11845)|2.79985773786|(0.969,0.891,0.964)|-1
-VSSILNVEQSPQSLHVQEGDSTNFTCSFPSS-----NF-YALHWYRWETAKSPEALFVM
TLN---GD--EK----KTGRISATLNTKEGYSYLY------IK-GSQPEDSATYLCAF--
-----
>V88RF-AJFE01010827.1-iglv |(3125, 3428)|2.91472560727|(0.998,0.996,0.936)|-1
-SVTSYVLTQ-PPSVSVAPEQTARITCG---G---NNIGSKSVHWYQQKPGQAPVLVIYD
D---------SDRPSGIPERFSGSK--SGNTATLT------IS-RVEAGDEADYYCQVWD
SSSKH
>V89RF-AJFE01010827.1-iglv |(11046, 11349)|2.99288400513|(1.000,0.995,0.998)|-1
-SVVSSELTQ-DPAVSVALGQTVRITCQ---G---DSLRSYYASWYQQKPGQAPVLVIYG
N---------NNRPSGIPDRFSGSS--SGNTASLT------IT-GAQAEDEADYYCSSLD
SSGNH
>V90RF-AJFE01010827.1-iglv |(27044, 27354)|2.92374403277|(0.972,0.972,0.980)|-1
-SWAQSALTQ-PPSVSGSPGQSVTISCTGTSS---DVGSYNRVSWDQQPPGKAPKLMIYE
V---------SKRPSGVPDRFSGSK--SGNTASLT------IS-GLQAEDEADYYCSSYT
SSST-
>V91RF-AJFE01010828.1-iglv |(147, 450)|2.98120030738|(0.998,1.000,0.984)|-1
-SVTSYVLTQ-PPSVSVAPGQTARITCG---G---NNIGSKSVHWYQQKPGQAPVLVVYD
D---------SDQPSGIPERFSGSK--SGNTATLT------IS-RVEAGDEADYYCQVWD
SSSDH
>V92RF-AJFE01010829.1-iglv |(16809, 17106)|2.95737067436|(0.998,0.964,1.000)|-1
-SVASYELTQ-PSSVSVSPGQTARITCS---G---DVLAKNYARWFQQKPGQAPVLVIYK
D---------SERPSGIPERFSGSS--SGTTVTLT------IS-GAQVEDEADYYCYSAA
DNN--
>V95RF-AJFE01017581.1-iglv |(4261, 4557)|2.9929000027|(1.000,0.996,0.997)|-1
-SVASYELTQ-PPSVSVSPGQTASITCS---G---DKLGDKYAYWYQQKSGQSPVLVIYQ
D---------SKRPSGIPERFSGSN--SGNTATLT------IS-GTQAMDEADYYCQAWD
SST--
>V97RF-AJFE01017584.1-iglv |(3557, 3860)|2.99696400065|(1.000,0.997,1.000)|-1
-SEASYELTQ-PPSVSVSPGQTARITCS---G---DALPKQYAYWYQQKSGQAPVLIIYE
D---------SKRPSGIPERFSGSS--SGTMATLT------IS-GAQVEDEADYYCYSTD
SSGNH
>V98RF-AJFE01017584.1-iglv |(14566, 14876)|2.87120584607|(0.999,0.953,0.941)|-1
-SWAQSALTQ-PPSASRSPGQSVTISCTGTSS---DIGGYNYVSWYQQHPGKAPKLMIYE
V---------SKRPSGVPDRFSGSK--SGNTASLT------VS-GLQAEDEADYYCSSYA
GSNN-
>V99RF-AJFE01017586.1-iglv |(12261, 12571)|2.95417917488|(0.991,1.000,0.966)|-1
-SWAQSALTQ-PPSVSGSPGQSVTISCTGTSS---DVGGYNYVSWYQQHPGTAPKLMIYD
V---------SKRPSGVPDRFSGSK--SGNTASLT------IS-GLQAEDEADYYCCSYA
GSYS-
>V102RF-AJFE01020628.1-iglv |(6538, 6850)|2.98874002125|(1.000,0.993,0.996)|-1
-SWAQSVLTQ-PPSVSGAPGQRVTISCTGSSS---NIGAGYDVHWYQQLPGTAPKLLIYE
N---------NKRPSGVPDRFSGSK--SGTSASLA------IT-GLQAEDEADYYCQSYD
SSLSG
>V104RF-AJFE01020631.1-iglv |(2749, 3058)|2.98994800078|(0.995,0.997,0.998)|-1
-SWAQSVLTQ-PPSVSGTPGQRVTISCSGSSS---NIG-SNTVNWYQQLPGTAPKLLIYS
N---------NQRPSGVPDRFSGSK--SGTSASLA------VS-GLRSEDEADYYCAAWD
DSLNG
>V105RF-AJFE01020631.1-iglv |(24444, 24762)|2.85880720422|(0.997,0.901,0.997)|-1
-SLSQPVLTQ-PTSLSASPGASARLTCTLRSG---INVGSYYISWYQQKPGSPPRYLLNY
YSD---SD--KGQGSGVPSRFSGSKDASTNAGLLL------IS-GLQSEDEADYYCAIWY
S----
>V106RF-AJFE01020632.1-iglv |(18572, 18882)|2.91180503062|(0.993,0.964,0.962)|-1
-SLSQSVVTQ-PASLSASPGASASLTCTLRSG---INVGTYRISWYQQKPGSPPRYLLRY
KSD---SD--KQQGSGVPSRFSGSKDASANAGILV------IS-GLQSEDEADYYCMI--
-----
>V107RF-AJFE01020634.1-iglv |(1918, 2227)|2.99392000218|(1.000,0.998,0.996)|-1
-SWAQSVLTQ-PPSVSAAPGQKVTISCSGSSS---NIG-NNYVSWYQQLPGTAPKILIYD
N---------NKRPSGISDRFSGSK--SGTSATLG------IT-GLQTGDEADYYCGTWD
SSLSA
>V110RF-AJFE01022796.1-iglv |(57629, 57936)|2.90957299062|(0.989,0.934,0.999)|-1
-SWANFMLTQ-PHSVSESLGQTVTISCPRSSG---SIA-SNYVQWYQQRPGSAPTTVIYE
D---------NRRPSGVPDRFSGSIDRSSNSASLT------IS-GLKSEDEADYYCQSYD
SS---
>V111RF-AJFE01022798.1-iglv |(2606, 2906)|2.91739010128|(0.985,0.963,0.972)|-1
-SLSQLVLTQ-SPSASASLGASVKLTCTLSSG---H--SSYAIAWHQQQPEKGPRYLMKL
NSD---GS--HSKGDGIPDRFSGSSSG--AERYLT------IS-SLQSEDEADYYCQTW-
-----
>V112RF-AJFE01022798.1-iglv |(70777, 71086)|2.95194425777|(0.996,0.990,0.969)|-1
-VDSQTVVTQ-EPPFSVSPGGTVTLTCGLSSG---SVSTSYYPSWYQQTPGQAPRTLIYS
T---------NTRSSGVPGRFFGSI--IGNKAALT------IT-GAQADDESDYYCLLYM
GSGI-
>V115RF-AJFE01024276.1-trav |(19317, 19607)|2.9889000027|(0.994,0.997,0.998)|-1
-VSSEDKVVQSPLSLVVHEGDTVTLNCSYEVT-----NF-QSLLWYKQEK-KAPTFLFML
TSS---GI--EK----KSGRLSSILDKKELFSILN------IT-ATQTGDSAIYLCAVE-
-----
>V116RF-AJFE01024276.1-trav |(73725, 74027)|2.99899200002|(0.999,1.000,1.000)|-1
-FSMAQTVTQSQPEMSVQEAETVTLSCTYDTS-----ESDYYLFWYKQPPSRQMILVIRQ
EAY---KQ--QN---ATENRFSVNFQKAAKSFSLK------IS-DSQLGDAAMYFCAYRS
-----
>V117RF-AJFE01024276.1-trav |(95666, 95954)|2.97440816598|(0.995,0.983,0.997)|-1
-LSGELKVEQSPLFLSTQEGKNYTIYCNYSTT-----S--DRLYWYRQDPGKSLESLFVL
LSN---GA--VK----QEGQLMASLDTKARLSTLH------IT-AAVHDLSATYFCAV--
-----
>V119RF-AJFE01045439.1-ighv |(4672, 4981)|2.99899600001|(1.000,1.000,0.999)|-1
-VQCEVQLVE-SGGGLVQPGGSLTLSCAASGFT-F---SSYWMSWVRQAPGKGLEWVANI
KK--DGSE--KYYADSVKGRFTISRDNAKNSLYLQ------MN-SLRAEDTAVYYCAT--
-----
>V120RF-AJFE01045444.1-ighv |(1979, 2288)|2.99698000014|(1.000,0.999,0.998)|-1
-AHSQVQLVQ-SGAEVKKPGASVKVSCKASGYT-F---TSYDINWVRQATGQGLEWMGWM
NPN--SGN--TGYAQKFQGRVTMTRDTSISTAYME------LS-SLRSEDTAVYYCAR--
-----
>V121RF-AJFE01045447.1-ighv |(71, 380)|2.99698000014|(0.998,1.000,0.999)|-1
-VQCEVQLVE-SGGGVVQPGRSLRLSCAASGFT-F---SNYAMHWVRQAPGKGLEWVSVI
SS--SGSY--IYYADSVKGRFTISRDNAKNSLYLQ------MN-SLRAEDTALYYCAK--
-----
>V122RF-AJFE01045453.1-ighv |(639, 948)|2.99698000014|(1.000,0.999,0.998)|-1
-VQCQVQLVE-SGGGLVKPGGSLRLSCAASGFT-F---SNHYMSWIRQAPGKGLEWVSYI
SYD--SSY--INYADSVKGRFTISRDNAKNSLYLQ------MN-SLRAEDTAVYYCAR--
-----
>V123RF-AJFE01047586.1-igkv |(1119, 1419)|3.0|(1.000,1.000,1.000)|-1
-TRCDIQMTQSPSSLSASVGDRVTITCRASQGIS------NYLAWYQQKPGKAPKLLIYY
A---------SRLESGVPSRFSGSG--SGTDYTLT------IS-SLQPEDFATYYCQQYN
SNP--
>V125RF-AJFE01070459.1-trbv |(21089, 21386)|2.99596800026|(1.000,0.998,0.998)|-1
--LMEADIYQTPRYLVIGTGKKITLECSQTMG-------HDKMYWYQQDPGMELHLIHYS
YGV---NS--TEKGD-LSSESTVSRIR-TEHFPLT------LE-SARPSHTSQYLCASSE
-----
>V127RF-AJFE01070459.1-trbv |(70897, 71194)|2.98393200206|(0.993,0.994,0.997)|-1
--LVDVKVTQSSRYLVKRMGEKVFLECVQDMD-------HENMFWYRQDPGLGLRLIYFS
SDV---KM--KEKGD-IPEGYSVSREK-KERFSLI------LE-SASTNQTSMYLCASSI
-----
>V128RF-AJFE01070459.1-trbv |(89682, 89985)|2.61297741374|(0.975,0.813,0.932)|-1
-SVFSAVISQKPSRDICQRGTSLTIQCQVDSQ-------VTMMFWYRQQPGQSPTLIATA
NQG--SEA--TYETGFVIDKFPISRPN-LTFSTLT------VS-NMSPEDSSIYLCSVE-
-----
>V130RF-AJFE01070460.1-trbv |(18108, 18405)|2.99699200002|(0.999,0.998,1.000)|-1
--TVDGGITQSPKYLFRKEGQNVTLNCEQNLN-------HDAMYWYRQDPGQGLRLIYYS
QIV---ND--FQKGD-IAEGYSVSREK-KESFPLT------VT-SAQKNPTAFYLCASSI
-----
>V132RF-AJFE01070460.1-trbv |(44986, 45286)|2.95150267138|(0.995,0.988,0.971)|-1
--SFHAKVTQTPGHLVKGKGQKTKMDCTPEKG-------HVFVYWYQQNQNKEFMLLISF
QNE---QV--LQETEMHKTRFSSQCPK-NTPCSLA------IL-SSEPGDTALYLCASSQ
-----
>V134RF-AJFE01070461.1-trbv |(19125, 19425)|2.85659938477|(0.997,0.968,0.919)|-1
--HKEAGVTQFPSHSVIEKGQTVTLRCDPISG-------HDNLYWYRRVMGKEIKFLLHF
VRE---SK--QDESGMPNNRFLAERTG-GTYSTLK------VQ-PAELEDSGVYFCASSQ
-----
>V135RF-AJFE01070461.1-trbv |(29248, 29548)|2.95094800078|(0.982,0.985,0.984)|-1
--SPGEEVTQTPKHLVRGEGQKAKLYCAPIKG-------HSYVFWYQQVLKKEFKFLISF
QNE---NV--FDKTGMPKERFSAKCLS-NSPCSLE------IQ-ATKLEDSAVYFCASSQ
-----
>V137RF-AJFE01070462.1-trbv |(17609, 17909)|2.98783600705|(0.999,0.994,0.995)|-1
--HTDAGVIQSPRHEVTEMGQEVTLRCKPISG-------HNSLFWYRQTMMQGLELLIYF
NNN---VP--IDDSGMPKDRFSAKMPN-ASFSTLK------IQ-PSEPRDSAVYFCASSL
-----
>V138RF-AJFE01070463.1-trbv |(1165, 1465)|2.95052296609|(0.997,0.999,0.960)|-1
--HTGAGVSQTPSNKVTEKGKDVELRCDPISG-------HAALYWYRQSLGQGPEFLIYF
RGT---GA--ADDSGLPNDRFFAVRPE-GSVSTLK------IQ-RTEQGDSAVYLCASSL
-----
>V141RF-AJFE01070463.1-trbv |(24431, 24731)|2.94104239695|(0.994,0.978,0.972)|-1
--LSEAEVAQSPRYKITEKSQAVAFWCDPISG-------HATLYWYRQILGQGPELLVQF
QDE---SV--VDDSQLPKDRFSAERLK-GVDSTLK------IQ-PAELGDSAMYLCASSL
-----
>V144RF-AJFE01070463.1-trbv |(67763, 68060)|2.92776289014|(0.996,1.000,0.943)|-1
--PVNGGVTQTPKFQVLKTGQSMTLQCAQDMN-------HDYMYWYRQDPGMGLRLIHYS
AGA---GI--TDKGE-VPNGYNVSRSN-TEDFPLS------LV-SAAPSQTSVYFCASSY
-----
>V145RF-AJFE01070463.1-trbv |(71976, 72276)|2.9898400105|(0.998,1.000,0.992)|-1
--HTGAGVSQSPRYKVAKRGRDVALRCDSISG-------HVTLYWYRQTLGQGSEVLTYF
RSD---AQ--RDKSGRPSGRFSAERPE-RSVSTLK------IQ-RTEQGDSAVYLCASSL
-----
>V146RF-AJFE01070463.1-trbv |(79903, 80199)|2.96791360742|(1.000,0.979,0.991)|-1
--SVETGVTQSPTHLIKTRGQQVTLRCSPQSG-------HNTVSWYQQALGQGPQFIFQY
YRE---EE--NGRG-NFSPRFSGRQFP-NYSSELN------VN-ALELDDSALYLCASSL
-----
>V147RF-AJFE01070463.1-trbv |(86352, 86648)|2.99389600501|(1.000,0.999,0.995)|-1
----NAGVTQTPKFRILKIGQSMTLQCAQDMN-------HNYMYWYRQDPGMGLKLIYYS
VGA---GI--TDKGE-VPNGYNVSRST-TEDFPLR------LE-SAAPSQTSVYFCASSY
ST---
>V148RF-AJFE01070463.1-trbv |(99363, 99659)|2.97580866856|(0.997,0.980,1.000)|-1
--PVDAGVTQSPTHLIKTRGQHVTLRCSPISG-------HKSVSWYQQALGQGPQFIFEY
YEK---EE--RGRG-NFPDRFSARQFP-NYSSELN------VN-ALLLGDSALYLCASSL
-----
>V150RF-AJFE01070463.1-trbv |(108994, 109294)|2.96904239695|(0.978,1.000,0.994)|-1
--HTGAGVSQSPRYKVTKRGQDVTLRCDPISG-------HVALYWYQQALGQGPEFLTYF
NYE---AQ--PDKSGLPNDRFSAERPE-GSNSTLT------IQ-RTEQRDSAMYLCASNL
-----
>V151RF-AJFE01070463.1-trbv |(116814, 117110)|2.94594028297|(0.990,0.979,0.978)|-1
--SVDAGVTQSPIHLIKTRGQQVTLRCSPQSG-------HDTVSWYQQVLGQGPQCIFEY
YEE---EE--RQRG-NFPDRFSGHQFP-NYSSELN------VN-ALLLGDSALYLCASSL
-----
>V153RF-AJFE01070463.1-trbv |(128406, 128706)|2.97530822856|(0.997,0.995,0.984)|-1
--HTGAGVSQSPRYKVTKRGQDVTLRCDPISS-------HATLYWYQQALGQGPEFLTYF
NYE---AQ--PDKSGLPNDRFSAERPE-GSISTLT------IQ-RTEQRDSAMYLCASSL
-----
>V154RF-AJFE01070463.1-trbv |(136837, 137133)|2.98972803289|(1.000,0.992,0.998)|-1
--PVDAGVTQSPTHLIKTRGQHVTLRCSPISG-------HTSVSWYQQALGQGPQFIFQY
YEK---EE--RGRG-NFPDRFSARQFP-NYSSELN------VN-ALLLGDSALYLCASSL
-----
>V155RF-AJFE01070463.1-trbv |(144146, 144443)|2.97588400513|(0.993,0.995,0.988)|-1
--PVNAVVTQTPKFQVLKTGQSMTLQCAQDMN-------HDCMSWYRQDPGMGLRRIHYS
VAA---GI--TDKGE-VPDGYNVSRSN-KEDLPLR------LE-SAAPSQTSVYFCASSY
-----
>V156RF-AJFE01070463.1-trbv |(148806, 149106)|2.9688400105|(0.991,0.993,0.985)|-1
--HTGAGVSQSPKYKVTKRGQDVALRCDPISG-------HVSLFWYQQALGQGPEFLTYF
RNE---AQ--LDKSGLPSDRFFAERPE-GSVSTLK------IQ-RTQQEDSAVYLCASSL
-----
>V157RF-AJFE01070463.1-trbv |(157011, 157307)|2.93443897096|(0.994,0.957,0.989)|-1
--PVEAGVTQSPTHLIKTRGQQVTLRCSPISG-------HTSVYWYQQALGLGLQFLLWY
DEG---EE--RNRG-NFPRRFSGRQFP-NYSSELN------VN-ALELEDSALYLCASSL
-----
>V158RF-AJFE01070463.1-trbv |(166234, 166534)|2.97983600705|(0.993,0.989,0.998)|-1
--HADTGVSQDPSHKITKRGQNVTFRCDPISE-------HNRLYWYRQTLGQGPEFLTYF
QNE---AQ--LEKSRLLSDRFSAERPK-GSFSTLE------IQ-HTEQGDSAIYLCASSL
-----
>V159RF-AJFE01070463.1-trbv |(172755, 173052)|2.94724064902|(0.997,0.959,0.997)|-1
--SVAAGVIQSPRYLIKEKRETATLKCYPIPR-------HDTVYWYQQGPGQDPQFLISF
YEK---MQ--SDKG-SIPDRFSAQQFS-DYHSELN------MS-SLELGDSALYFCASSS
-----
>V160RF-AJFE01070464.1-trbv |(8813, 9110)|2.99193200206|(0.999,0.998,0.995)|-1
--PLDTAVSQTPKYLVTQMGKKESLKCEQNLG-------HNAMYWYKQDSKKFLKTMFIY
SNK---EP--ILNET-VPNRFSPDSPD-KAHLNLH------IN-SLELGDSAVYFCASSQ
-----
>V161RF-AJFE01070464.1-trbv |(12266, 12563)|2.96765257659|(0.998,0.982,0.989)|-1
--PMEMGVTQTPRHLVMGMTNKKSLKCEQHLG-------HNAMYWYKQSAKKPLELMFVY
SLE---ER--VENNS-VPSRFSPECPN-SSHLFLH------LH-TLQPEDSALYLCASSQ
-----
>V162RF-AJFE01070464.1-trbv |(20566, 20863)|2.97853206285|(0.998,0.992,0.989)|-1
--PVNAGVTQTPKFRVLKTGQSMSLLCAQDMN-------HEYMYWYRQDPGMGLRLIHYS
VGE---GT--TAEGE-VPDGYNVSRLK-KQNFLLG------LE-SAAPSQTSVYFCASSY
-----
>V163RF-AJFE01070464.1-trbv |(52077, 52374)|2.9503601679|(0.989,0.977,0.985)|-1
--PVIAGITQAPTSQILAAGRSMTLRCTQDMR-------HNAMYWYRQDLGLGLRLIHYS
NTA---GT--TGKGE-VPDGYSVSRAN-TDDFPLT------LA-SAVPSQTSVYFCASSD
-----
>V164RF-AJFE01070465.1-trbv |(4903, 5200)|2.989900005|(0.995,1.000,0.995)|-1
--PVNAGVTQSPKFRVLKTGQSMTLQCAQDMN-------HNYMYWYRQDPGMGLRLIHYS
AGE---GT--TAKGE-VPDGYNVSRLN-TQNFLLR------LE-SAAPSQTSVYFCATSE
-----
>V166RF-AJFE01119883.1-ighv |(31777, 32092)|2.95064403777|(0.988,0.983,0.980)|-1
-VQCEVQLVE-SGGGLVQPGGSLRLSCAASGFT-F---SDHYMSWVRQAQGKGLELVRLI
RNKANSYT--TEYAASVKGRFTISREDSKNTLYLQ------MS-SLKTEDLAVYYCAR--
-----
>V0RF-ABGA01025787.1-ighv |(2055, 2364)|2.85301923951|(0.964,0.953,0.939)|1
-TYSQVQLVQ-SGHEVKQPGASVKVSCKDSGYS-F---TTYGMNWVQQAPEQGLEWMGWF
NTD--TGN--PTYAQGFTGRFVFSMDTSVSTAYLQ------IS-SLKAEDTAMYYCAR--
-----
>V3RF-ABGA01025791.1-ighv |(3901, 4216)|2.99899200002|(0.999,1.000,1.000)|1
-VQCEVQLVE-SGGGLVQPGGSLRLSCAASGFT-F---SSYWMSWVRQAPGKGLEWVGFI
KNKADGGT--TDYAASVKGRFTISRDDSKNTLYLQ------MN-SLKTEDTAIYYCAR--
-----
>V5RF-ABGA01025797.1-ighv |(8415, 8724)|2.99599200002|(0.998,0.999,0.999)|1
-VQCEVQLVE-SGGGLVQPGGSLRLSCVASGFT-F---SSYAMRWVHQAPGKGLEWVSAI
SG--SGGS--TWYPDSVKGRFTISRDNAKNTLYLQ------MN-SLRAEDTAVYYCVR--
-----
>V6RF-ABGA01025808.1-ighv |(3704, 4019)|2.99899200002|(0.999,1.000,1.000)|1
-VQCEVQLVE-SGGGLVQPGGSLRLSCAASGFT-F---SSSAMHWVRQAPGKGLEWVGRI
RSKANSYA--TEYAASVKGRFTISRDDSKNTAYLQ------MN-SLKTEDTALYYCTT--
-----
>V7RF-ABGA01025808.1-ighv |(11416, 11731)|3.0|(1.000,1.000,1.000)|1
-LQCEVQLVE-SGGGLVQPGGSLRLSCAASGFT-F---SDHYMDWVRQAPGKGLEWVARI
RNKANSYT--TEYAASVKGRFTISRDDSKNTLYLQ------MS-SLKTEDTAVYYCAR--
-----
>V8RF-ABGA01025808.1-ighv |(27673, 27982)|2.99389600501|(1.000,0.995,0.999)|1
-VQCEVQLVE-SGGGLVQPGGSLRLSCAASGFT-F---RDHYMNWVRQAPGKGLEWVSAI
SG--SSSS--TYYADSVKGRFTISRDNAKNTLYLQ------MN-SLRAEDTAVYYCVR--
-----
>V9RF-ABGA01025808.1-ighv |(39511, 39826)|2.98578801933|(0.997,0.999,0.990)|1
-VQCEVQLVE-SGGGLVQPGGSLRLSCAASGFT-F---SNYYMSWVRQAPGKGLEWEGFI
KNKTNGGT--TEYAASVKGRFTISRDDSKSITYLQ------MS-SLKTEDTAVYYCTR--
-----
>V10RF-ABGA01025808.1-ighv |(52101, 52413)|2.8969022717|(0.988,0.927,0.997)|1
-VQCELQLVE-SRGDLVQPGGSLRLSCAASGFT-F---SSYGMNWVCQAPGKGLEWVSVI
SR--SSGT--IHYADSMKGRFTISRDNAKNSLYLQ------MNNSLRAEDTAVYYCVK--
-----
>V12RF-ABGA01025810.1-ighv |(7175, 7481)|2.99393200206|(0.999,0.995,1.000)|1
-VQCEVQLVE-SGGGLVQPGGSLRLSCAASGFT-I---SSYDMHWVHQAPGKGLEWVSAI
ST---GGG--TYYADSVKGRFTISRDNAKNTLYLQ------MN-NLRAEDTAVYYCAK--
-----
>V13RF-ABGA01037228.1-ighv |(1414, 1723)|2.96987023728|(0.999,0.976,0.997)|1
-VLSQVQLQE-SGPGLVKPSETLSLTCAVSGGS-IS-S-GYYWGWIRQPPGKGLEWIGSI
YYS---GS--TYYNPSLKSRVTISVDTSKNQFSLK------LS-SVTAEDTAVYYCAR--
-----
>V14RF-ABGA01044302.1-ighv |(5170, 5476)|2.9889000027|(0.996,0.993,1.000)|1
-VLSQVQLQE-SGPGLVKPSETLSLTCAVSGGS-IS---SYYWSWIQQPPGKGLEWIGYI
YS---SGS--TNYNPSLKSRVTMSVDTSKNQFSLK------LS-SVTAADTAVYYCAR--
-----
>V15RF-ABGA01044302.1-ighv |(9977, 10286)|2.79261652199|(0.940,0.929,0.925)|1
-AHSQVQLGQ-SGPQVKKPESSVKVSCKASGYT-F---TSSAMQWVRQAPGQGLEWIGWI
IVG--SGN--TNYAQKFQGRVTITRDTSTSTAYME------LS-SLRSEDTAVYYCAA--
-----
>V16RF-ABGA01044304.1-ighv |(6033, 6342)|2.97369865217|(1.000,0.976,1.000)|1
-VLSQVQLQE-SGPGLVKPSETLSLTCAVSGGS-IS-S-GYYWGWIRQPPGKGLEWIGSI
YYS---GS--TYYNPSLKSRVTISVDTSKNQFSLK------LS-SVTAADTAVYYCAR--
-----
>V17RF-ABGA01044305.1-ighv |(3517, 3823)|2.98532022844|(1.000,0.999,0.987)|1
-VLSQVQLQE-SGPGLVKPSETLSLTCAVSGGS-IS---SYYWGWIRQPPGKGLEWIGYI
YS---SGS--TNYNPSLKSRVTMSVDTSKNQFSLK------LS-SVTAADTAVYYCVR--
-----
>V18RF-ABGA01044306.1-ighv |(1052, 1358)|3.0|(1.000,1.000,1.000)|1
-VLSQVQLQE-SGPGLVKPSETLSLTCAVSGGS-IS---SNYWSWIRQPPGKGLEWIGYI
YS---SGS--TYYNPSLKSRVTMSIDTSKNQFSLK------LS-SVTAADTAVYYCAR--
-----
>V20RF-ABGA01044307.1-ighv |(456, 762)|2.99385601037|(1.000,1.000,0.994)|1
-VLSQVQLQE-SGPGLVKPSETLSLTCAVSGGS-I---SSYYWSWIRQPPGKGLEWIGGI
YSS---GS--TYYNPSLKSRVTISVDTSKNQFSLK------LS-SVTAADTAVYYCAR--
-----
>V24RF-ABGA01044313.1-ighv |(11041, 11356)|2.99798400013|(1.000,0.998,1.000)|1
-VQCEVQLVE-SGGGLVHPGGSLRLSCTASGFT-F---GDYAMSWVRQAPGKGLEWVGFI
RSKAYGGT--TEYAASVKGRFTISRDDSKSIAYLQ------MN-SLKTEDTAVYYCAR--
-----
>V27RF-ABGA01044319.1-ighv |(4092, 4401)|2.97922818506|(0.987,0.994,0.999)|1
-VQCEVQLVE-SEGGLVQPGGSLRLSCAASGFT-F---DDYAMHWVRQAPGKGLKWVSGI
NW--NGGS--TYYADSVKGRFTISRDNSKNSLYLQ------MN-SLRAEDTALYYCAK--
-----
>V28RF-ABGA01058270.1-ighv |(14488, 14797)|2.79843921322|(0.957,0.977,0.886)|1
-VLSQVQLQQ-WGPGLVKPSETLSLTCAVCGGS-IS--SGYYWSWIRQPPGKGLEWIGYM
H--H-SGS--TYYNPSLKSRVTMSVETSKNQFSLK------LS-SVTAADTAVYYCAR--
-----
>V29RF-ABGA01058270.1-ighv |(28194, 28503)|2.84806698619|(0.983,0.945,0.935)|1
-VQCEVQLVE-SGGGLVQSRGSLRFSCAASGFT-F---SSCGMNWVRQAPGKGLEWVAII
WY--DGSN--KYYADSVKGRFTISRDNSKNMLYLQ------MN-SLRVEDMAVYYCAK--
-----
>V30RF-ABGA01058270.1-ighv |(38768, 39077)|2.91196034001|(0.969,0.961,0.983)|1
-VLSQVRLQE-SGPGLVKPSETLSLTCAVSVDS-IS--SGYYWSWIRQPPGKGLEWIGYI
H--H-SGS--TYYNPSLKSRVTMSVDTSKNQFSLK------LS-SVTAADMAVYYCAT--
-----
>V31RF-ABGA01058273.1-ighv |(621, 936)|2.99496000066|(0.997,0.998,1.000)|1
-VQCDVQLVE-SGGGLVQPGGSLRLSCAASGFT-F---SDYYMSWVHQPPGKGLEWVGLI
RNKANGGT--TEYAASVKGRFTISRDDSKSIAYLQ------MN-SLKTEDTAVYYCTR--
-----
>V34RF-ABGA01091248.1-trbv |(29358, 29658)|2.80357170556|(0.974,0.953,0.900)|1
--HTDAGVIQSPRHEVTEMGKEVTLRCKPISG-------HEDLFWYRQTMMQGLELLIYF
NNK---AV--MDDSGMPKDRFSAKMPN-ASFSTLK------IQ-PSEPRDSAVYFCASSL
-----
>V38RF-ABGA01091249.1-trbv |(14302, 14599)|2.86462728311|(0.972,0.929,0.971)|1
--HGVAMVIQNPRYQVTQFGKPVTLSCSQNLN-------HNVMYWYQQKSSQAPKLLFHY
YDK---DF--NNEAD-TPDNFQSRRPN-TSFCFLD------IR-SPGLGDAAMYLCATSR
-----
>V39RF-ABGA01091249.1-trbv |(19286, 19586)|2.60720737804|(0.969,0.932,0.809)|1
--SPGEEVTQTPKHLVKGEGQEAKLYCAPIKG-------HSYVFWYQQVLKKEFKFLISF
QNE---NV--FDKTGMPKERFSAKCLP-NSPCSLE------IQ-ATKLEDSAVYFCASSQ
-----
>V41RF-ABGA01091252.1-trbv |(2503, 2800)|2.9586404731|(0.986,1.000,0.974)|1
--TVDGGITQSPKYLFRKEGQNVTLSCEQNLN-------HDAMYWYRQDPGQGLRLIYYS
GIV---ND--FQKGD-IAEGYSVSREK-KESFPLT------VT-SAQKNPTAFYLCASSI
-----
>V43RF-ABGA01091257.1-trbv |(2769, 3069)|2.8678610854|(0.986,0.948,0.946)|1
--SFHARVTQTPGHLVKGKGQKTKMDCTPEKG-------HTFVYWYQQNQNKEFMLLISF
QNK---QV--LQETEMHKKRFSSQCPK-NTPCSLA------TL-SSEPGDTALYLCASSQ
-----
>V44RF-ABGA01091257.1-trbv |(13504, 13802)|2.88339035839|(0.986,0.980,0.930)|1
--SMDADVTQTPRNRITKTGKRIMLECSQTKG-------HDGMYWYRQDPGLGLRLIYYS
FDV---KD--INKGE-ISDGYSVSRRT-QAKFSLS------LE-SATPNQTALYFCATSD
-----
>V45RF-ABGA01091260.1-trbv |(5031, 5328)|2.88061441971|(0.998,0.980,0.925)|1
--LMEADIYQTPRHLVIGTGKKITLECSQTMG-------HDKMYWYQQDPGMELHLIHYS
YGV---NS--TEKGD-LSSESTVSRIR-MEHFPLT------LE-SARPSHTSQYLCASSE
-----
>V46RF-ABGA01091263.1-trbv |(8280, 8583)|2.82878196667|(0.976,0.968,0.905)|1
-SVFSAVVSQKPSRDICQRGTSLTIQCQVDSQ-------VTMMFWYRQQPGQSLTLIATA
NQG--SEA--TYESGFVIDKFPISRPN-LTFSTLT------VS-NMSPEDSGIYLCSVE-
-----
>V51RF-ABGA01099940.1-ighv |(16077, 16386)|2.95669465218|(0.994,0.995,0.970)|1
-AHAEVQLVQ-SGAEVKKPGASVKFSCKVSGYT-F---TELSMHWVRQAPGKGLEWMGGF
DPD--DGE--TIYAQKFQGRVTMTEDTSTDTAYME------LS-SLRSEDTAMYYCAT--
-----
>V52RF-ABGA01099941.1-ighv |(996, 1308)|2.99180001921|(1.000,0.993,0.999)|1
-VQCEVQLVE-SGGGLVQPGGSLRLSCAASGFT-F---TNYYLHWFRQAPGKGLEWVAYI
SSG-SGGS--TNYPDSVKGRFTISRDNAKNTLYLQ------MN-SLRAEDTAVYYCAR--
-----
>V53RF-ABGA01099941.1-ighv |(12097, 12412)|2.97554104219|(0.998,1.000,0.979)|1
-VQCEVQLVE-SGGGLVQPGGSLRLSCAASGFT-F---SNYYMHWVRQAPGKGLEWVGFI
RTEAKGGT--TEYAASVKGRFTISRDDSKSIAYLQ------TN-SLKTEDTAVYYCTR--
-----
>V54RF-ABGA01099945.1-ighv |(5584, 5899)|2.95451241325|(0.999,0.987,0.972)|1
-VQCEVQLVE-SGGGLVQPGGSLRLSCAASGFT-F---SNAWLSWVRQAPGKGLEWVGRI
KSKADGGT--TDYAAPVKGRFTISRDDSKNTLYLQ------MN-SLKTEDTAVYYCAT--
-----
>V55RF-ABGA01099946.1-ighv |(22626, 22932)|2.99796800026|(0.998,1.000,1.000)|1
-VQCEVQLVE-SGGGLVQPGGSLRLSCAASGFT-V---SSYDMHWVRQAPGKGLEWVSAI
DT---DGD--TYYADSVKGRFTISRENAKNSLYLQ------MN-SLRAKDTAVYYCAR--
-----
>V56RF-ABGA01099946.1-ighv |(36315, 36622)|2.99085601037|(0.999,0.999,0.993)|1
-VQCEVQLVE-SGGGLVQPGRSLRLSCAASGIT-F---SNQYMSWVRQATGKGLEWVSYI
SGD--SSY--TSYADSVKGRFTISRDNAKNSLYLQ------MN-SLRVEDTAVYYCV---
-----
>V57RF-ABGA01099947.1-ighv |(19776, 20085)|2.99594800078|(0.997,1.000,0.999)|1
-VQCEVQLVE-SGGGLVQPGGSLRLSCAASGFT-F---SSYSMSWVRQAPGKGLEWVSAI
SG--SGSS--TYYPDSVKGRFTISRDNAKNTLYLQ------MN-SLRAEDMAVYYCVR--
-----
>V58RF-ABGA01099948.1-ighv |(6262, 6577)|2.96123309455|(0.991,1.000,0.972)|1
-VQCEVQLVE-SGGGLVQPGGSLRLSCAASGFT-F---SNYYMHWVRQAPGKGLEWVGFI
ASKAYGGT--TEYAASVKGRFTISRDDSKSIVYLQ------MN-SLKTEGTAVYYCTR--
-----
>V60RF-ABGA01099956.1-ighv |(15185, 15494)|2.99899600001|(1.000,1.000,0.999)|1
-VQCEVQLVE-SGGGLVQPGGSLRLSCAASGFT-F---SSYAMYWVRQAPGKGLEWVSAI
NSG--GGS--TYYADSVKGRFTISRENAKNTLYLQ------MS-SLRAEDTAVYYCAK--
-----
>V61RF-ABGA01104800.1-ighv |(1132, 1438)|2.96265347361|(1.000,1.000,0.967)|1
-VLSQVQLQE-SGPGLVKPSETLSLTCAVSGGS-I---SGYSWSWIRQPPGKGLEWIGSI
HS---SGS--TYYNPSLKSRVTISADTSKNQFSLK------LS-SVTAADTAVYYCAR--
-----
>V62RF-ABGA01104801.1-ighv |(6863, 7169)|2.77652694322|(0.995,1.000,0.856)|1
-VLSQVQLQE-SGPGLVKPSETLSLTCAVSGGS-IS---SYYWSWIRQPPGKGLEWIGYI
HS---SGS--TNSNPSLKSRVTMSVDTSKNQFSLK------LS-SVTAADTAVYYCAR--
-----
>V63RF-ABGA01129113.1-trbv |(1435, 1735)|2.90155347861|(0.978,0.983,0.945)|1
--HTGAGVSQSPRYKVAKRGQDVALRCDSIFG-------HVTFYWYQQTLGQGPEVLTYF
RSD---AQ--RDKSGLPSGRFSAERPE-GSVSTMK------IQ-HTEQGDSAVYLCASSL
-----
>V68RF-ABGA01174988.1-ighv |(27125, 27434)|2.97982866804|(1.000,0.983,0.998)|1
-VQCEVQLVE-SGGGLVQSRGSLRLSCAASGFT-F---SSCGMNWVRQAPGKGLEWVAVI
WY--DGSN--KYYADSVKGRFTISRDNSKNMLYLQ------MN-SLRVEDTAVYYCAK--
-----
>V71RF-ABGA01174999.1-ighv |(1443, 1758)|2.99899200002|(0.999,1.000,1.000)|1
-VQCEVQLVE-SGGGLVQPGGSLRLSCAASGFT-F---SDYYMSWVHQPPGKGLEWVGLI
RNKANGGT--TEYAASVKGRFTISRDDSKSIAYLQ------MN-SLKTEDTAVYYCTR--
-----
>V73RF-ABGA01194059.1-ighv |(3549, 3864)|2.98920015998|(0.990,1.000,1.000)|1
-VQCEVQLVE-SGGGLVQPGGSLRLSCAASGFT-F---SNHYMQWVRQAPGKGLEWVGLI
RNKADGET--TDYAASVKGRVTISRDDSKSITYLQ------MS-SLKTEDSAVYYCAR--
-----
>V76RF-ABGA01198108.1-igkv |(6191, 6491)|2.97076801985|(0.989,0.986,0.996)|1
-ARCDIQMTQSPTSLSASIGDSVTSTCQASQSIS------NELAWYQQKPGKVPKLLIYR
V---------SSLQMGIPSRFSGSG--SGTDFTLT------IT-SLQPDDVATYYCQQEY
SYP--
>V80RF-ABGA01243345.1-ighv |(15320, 15629)|2.99067605248|(1.000,1.000,0.991)|1
-VQCEVQLVE-SGGGLVQPGGSLRLSCAASGFT-F---SSYGMHWVRQAPGKGLEWVAVI
WY--DGSN--KYYADSVKGRFTISRDNSKNTLYLQ------MN-SLRVEDTAVYYCAK--
-----
>V84RF-ABGA01285645.1-igkv |(2124, 2410)|2.80792327612|(0.979,0.889,0.972)|1
-----IVMMQSPATLSVSPGERGTISCRASQSVS------NYLAWYQQKPGQSPRLLIYR
A---------SNRATGIPARFSGSG--SGTDFTLT------IS-SVELEDFAVYYCQQYN
AG---
>V85RF-ABGA01285648.1-igkv |(32619, 32919)|2.99593600205|(1.000,0.996,1.000)|1
-ARCDIQMTQSPSSVSASVGDRVTITCRASQGIS------SALAWYQQKPGKPAKLLIYA
A---------SSLQSGVPSRFSGSG--SGTDYTLT------IS-SLQPEDFATYYCQQYN
SVP--
>V86RF-ABGA01285649.1-igkv |(12602, 12902)|2.95604987297|(0.994,0.992,0.972)|1
-ARCDIQMTQSPSSLSASVGDRVTITCRASQGIS------DDLAWHQQKPGKAPKLLIYA
A---------SSLQSGVPSRFSGSE--SGTEFTLT------IS-SLQPEDFATYYCQQYN
SYP--
>V88RF-ABGA01290070.1-igkv |(266, 566)|2.79645433043|(0.983,0.894,0.954)|1
-TTGEVVLTQSPATLSLSPGERATLSCRASQSVS------NYLAWYQQKPGQAPRLLIYD
A---------SNRATGIPARFSGSG--SGTDFTLT------IS-SLEPEDFAVYYCQQRS
NLP--
>V90RF-ABGA01290201.1-trgv |(11173, 11486)|2.92116605151|(0.998,0.947,0.987)|1
-SQKSSNLEGRTKSVTRPTGSSAEITCDLPGE-----ST-VYIHWYLHQEGKAPQRLLYY
DSY---NSRVVLESGISPGKYDTYGST-RKNLRLI------LR-NLIENDSGVYYCAIWD
-----
>V91RF-ABGA01290201.1-trgv |(15529, 15842)|2.86284532288|(0.993,0.992,0.907)|1
-SQKSSNLEGGTKSVTRPTRSSAEITCDLTVT-----NA-FYIHWYLHQEGKAPQRLLYY
DVS---NSRDVLESGLGPGKYYTHTP-RWWSWILI------LR-NLIENDSGVYYCATWY
-----
>V92RF-ABGA01290202.1-trgv |(2218, 2531)|2.9256309073|(0.999,0.992,0.946)|1
-SQKSSNLEGGTKSVTRPTRSSAEITCDLTVT-----NA-FYIHWYLHQEGKAPQRLLYY
DVS---TARDVLESGLSPGKYYTHTP-RRWSWILR------LQ-NLIENDSGVYYCATWD
-----
>V96RF-ABGA01301078.1-trbv |(8868, 9168)|2.91663412726|(0.996,0.996,0.938)|1
--HTGAGVSQSPRYKVTKRGQDVALRCDPISG-------HDYLYWYQQALGQGPEFLTYF
QND---VQ--LDKSGMPSDRFSAEGLE-GSISTLK------IQ-RTEQGDSAVYLCASSL
-----
>V99RF-ABGA01301083.1-trbv |(1589, 1880)|2.97350008499|(0.993,0.998,0.983)|1
----NAGVTQTPKFRILKTGQSMTLQCAQDMN-------HNYMYWYRRDPGMGLKLIYYL
VAA---GT--TDKGE-VPDGYSVSRST-TEDFPLT------LE-SAAPSQTSVYFCASSY
-----
>V100RF-ABGA01301086.1-trbv |(3670, 3966)|2.97606587284|(1.000,0.978,1.000)|1
--PVDAGVTQSPTHLIKTRGQQVTLRCSPISG-------HKSVSWYQQALGQGPQFIFEY
YEK---EE--RGRG-NFPDRFSARQFP-NYSSELN------VN-ALLLGDSALYLCASSL
-----
>V101RF-ABGA01301086.1-trbv |(10960, 11257)|2.90483774723|(0.995,0.953,0.967)|1
--PMNAGVTQTPKFQVLKTGQSMTLQCAQDMN-------HDYMSWYRQDPGIGLRLIHYS
VAA---GI--TEKGE-TPSGYNVSRSN-TEDFPLR------LE-SAAPSQTSVYFCASSY
-----
>V102RF-ABGA01301086.1-trbv |(15590, 15890)|2.87604157414|(0.964,0.971,0.943)|1
--HTGAGVSQSPRYKVTKRGQDVALRCDPISG-------HVSLFWYQQALGQGPELLTYF
QNE---VQ--LHKSGLPSDRFFAERPE-GSICTLK------IQ-RTQQEDSAMYLCASSL
-----
>V103RF-ABGA01313761.1-ighv |(1090, 1396)|2.994900005|(1.000,1.000,0.995)|1
-VLSQVQLQE-SGPGLVKPSETLSLTCAVSGGS-IS---GYYWSWIRQPPGKGLEWIGYI
YS---SGS--TNYNPSLKSRVTVSVDTSKNQFSLK------LS-SVTAADTAVYYCAR--
-----
>V105RF-ABGA01313763.1-ighv |(465, 774)|2.79261652199|(0.940,0.929,0.925)|1
-AHSQVQLGQ-SGPQVKKPESSVKVSCKASGYT-F---TSSAMQWVRQAPGQGLEWIGWI
IVG--SGN--TNYAQKFQGRVTITRDTSTSTAYME------LS-SLRSEDTAVYYCAA--
-----
>V107RF-ABGA01318850.1-igkv |(776, 1076)|2.99174403277|(1.000,0.992,1.000)|1
-SRCDIQMTQSPSSVSASVGDRVTITCQASQGVS------NALAWYQQKPGKTPKLLIYD
A---------TTLQSGVPSRFSGSG--SGTDYTLT------IS-SLQPEDFATYYCQQYN
SYP--
>V109RF-ABGA01321409.1-igkv |(1894, 2185)|2.99696400065|(1.000,0.997,1.000)|1
----DIQMTQSPSSVSASVGDRVTITCRASQSIS------SWLAWYQQKPGKAPKLLIYK
A---------SNLQSGVPSRFSGSG--SGTDFTLT------IS-SLQPEDFATYYCQQYS
STP--
>V110RF-ABGA01321410.1-igkv |(12114, 12400)|2.9226309073|(0.998,0.991,0.945)|1
-----IVMTQSPATLSVSPGERGTISCRASQSVS------NYLAWYQQKPGQSPRLLIYR
A---------SNRATGIPARFSGSG--SGTDFTLT------IS-SVEPEDFAVYYCQQYN
TG---
>V111RF-ABGA01335280.1-iglv |(1203, 1509)|2.91754805197|(0.973,0.965,0.980)|1
--DSQTVVTQ-EPSFSVSPGGTVTLTCGLSSG---SVSTSYYPSWYQQTPGQALRMLIYS
T---------NTRTSGVPDCFSGSI--LGNKAALT------IT-GAQADDESDYYCVLYM
GSGI-
>V112RF-ABGA01342015.1-igkv |(1575, 1875)|2.99280401921|(1.000,1.000,0.993)|1
-TRCDIQMTQSPSSLSASVGDRVTITCRASQSIS------NYLAWYQQKPGKVPKLLIYA
A---------STLQSGVPSRFSGSG--SGTDFTLT------IS-SLQPEDVATYYCQKHN
SAP--
>V113RF-ABGA01356721.1-igkv |(4236, 4536)|3.0|(1.000,1.000,1.000)|1
-SRCDIQMTQSPSSLSASVGDRVTITCRASQSIS------SWLAWYQQKPGKAPKLLIYA
A---------SSLQSGVPSRFSGSG--SGTDFTLT------IS-SLQPEDFATYYCQQHN
SYP--
>V115RF-ABGA01356724.1-igkv |(802, 1093)|2.99598000014|(0.999,0.997,1.000)|1
----DIQMTQSPSSVSASVGDRVTITCRASQGIS------NYLNWYQQKPGKAPKLLIYA
A---------SSLQSGVPSRFSGSG--SGTDFTLT------IS-SLQPEDFATYYCQHFN
SYP--
>V116RF-ABGA01356726.1-igkv |(7542, 7842)|2.97106187285|(0.998,0.976,0.999)|1
-TTGEIVLTQSPATLSLSPGERATVSCRASQSVS------NYLAWYQQKPGQSPRLLIYD
A---------SNRATGIPARFSGSG--SGTDFTLT------IS-SLEPEDFAVYYCQQYN
NQT--
>V117RF-ABGA01356729.1-igkv |(273, 573)|2.99698000014|(1.000,0.999,0.998)|1
-ARCDIQMTQSPSSVSASVGDRVTITCRASQGIS------SYLAWYQQKPGKAPKLLIYA
A---------SSLQSGVPSRFSGSG--SGTEFTLT------IS-SLQPEDFATYYCMQHN
SYP--
>V120RF-ABGA01384193.1-ighv |(10967, 11276)|2.99598000014|(0.999,1.000,0.997)|1
-VQCEVQLVE-SGGGLVQPGGSLRLSCAASGFT-F---SSYGMNWVRQAPGKGLEWVSYI
SGD--SSY--INYADSVKGRFTISRDNAKNSLYLR------MN-SLRAEDTAVYYCVK--
-----
>V121RF-ABGA01386446.1-trav |(520, 807)|2.99899600001|(1.000,0.999,1.000)|1
--VNSQQGEEDPQALSIQEGENATMNCSYKTS------I-NNLQWYRQNSGRGLVHLILI
RSN---ER--EK----HSGRLRVTLDTSKKSSSLL------IT-ASRAADTASYFCATD-
-----
>V122RF-ABGA01386446.1-trav |(6159, 6450)|2.92288400513|(0.972,0.977,0.974)|1
-RTNGDPVTQTEGPVTLPERAALTLNCTYQSS-----YS-AFLFWYVQYLNKEPELLLRS
S-E---NQ---E---TDSRGFQASHVKSDSSFHLE------KP-SVQLSDSAVYYCVLR-
-----
>V123RF-ABGA01386446.1-trdv |(9538, 9841)|2.88850238965|(0.979,0.988,0.931)|1
-SSMAQKVTQAQAAISVVEKEEVTLDCVYETR-----DATYYLFWYKQPSSGELVFLIRQ
NSF---NE--QN---EVNGRYSWNFQKSTSSFNLT------IT-ASQVMDSAVYFCALSE
-----
>V126RF-ABGA01387831.1-trav |(4904, 5207)|2.91423069306|(0.979,0.943,0.999)|1
-PGIAQKITQTLPAMFVQEKEAVTLDCTYDTS-----DQSYGLFWYKQPSSGEMILLIYQ
GSY---DK--QN---ATEGRYSLNFQKARKSANLV------IS-ASQLGDSAMYFCAMKE
-----
>V127RF-ABGA01387833.1-trav |(6325, 6619)|2.92456585077|(0.956,0.989,0.988)|1
-RTHGDSVTQMEGPVTLSEEAFLTINCTYTAT-----GY-PSLFWYVQYPGEGLQLLLKA
TKA---DD---K---GSNKGFEATYHKETTSFHLE------KD-SVRESDSGVYFCALS-
-----
>V128RF-ABGA01387833.1-trav |(37695, 37988)|2.97296800026|(0.991,0.989,0.993)|1
VWCQQKEVEQNPGPLSVPEGAIASLNCTYSNS-----AF-QYFMWYRQYSRKGPELLIYI
YSS---GN--K-----QDGRFTAQVDTSGKYMSLF------IR-DSQPSDSATYLCAMS-
-----
>V130RF-ABGA01394062.1-igkv |(9765, 10067)|2.89484208391|(0.989,0.924,0.999)|1
-SSAEIVMTQTPLSLSITPGEPASISCRSSQSLLHS-DGNTYLHWYLQKPGQPPQLLIYE
V---------SNRFSGVPDRFSGSG--SGTDFTLK------IS-RVEAEDVGVYYCMQD-
-----
>V132RF-ABGA01394066.1-igkv |(10063, 10363)|2.7755646145|(0.980,0.904,0.926)|1
-TTGEIVLTQSPATLSLSPGERATLSCRASQSV------SNYLAWYQQKPGQVPRLLIYR
A---------SNRTTGIPDRFSGSG--SGTDFTLT------IS-RLDPEDFAVYYCQQYG
SSP--
>V134RF-ABGA01394068.1-igkv |(3664, 3964)|3.0|(1.000,1.000,1.000)|1
-SRCDIQMTQSPSSVSASVGDRVTITCRASQGIS------NYLAWYQQKPGKAPKLLIYY
A---------SSLQSGVPSRFSGSG--SGTDYTLT------IS-SLQPEDFATYYCQQYN
SYP--
>V135RF-ABGA01394071.1-igkv |(1743, 2043)|2.99480001|(0.995,1.000,1.000)|1
-SRCDIQMTQSPSSLSASVGDRVTITCQASQGIS------NALAWYQQKPGKTTKLLIYR
A---------SSLQSGVPSSFSGSG--SGTDFTLT------IS-SLQPEDFATYYCQQYY
SDP--
>V136RF-ABGA01394075.1-igkv |(3782, 4082)|2.87989058342|(0.995,0.944,0.957)|1
-TTGEIVMTQSPATLSLSPRERATISCRASQSVS------SNLAWYQQKPGQAPRLLIYG
A---------SNRATGIPARFSGSG--SGTDFTLT------IS-SLEPEDFAVYYCQQYN
NWP--
>V141RF-ABGA01083932.1-trav |(371, 664)|2.92428751647|(0.977,0.954,0.997)|-1
-VSRGESVRPHLSTLGVQEGDNSVINCAYSDS-----AS-DYFIWYKQESGKGPQFIIDI
RSN---MD--KR----QGQRVTVLLNKTVKHLSLQ------IA-ATQPGDSAVYFCAEN-
-----
>V142RF-ABGA01083934.1-trav |(495, 792)|2.94263026991|(0.992,0.984,0.969)|-1
-GTRAQSVTQLDSHVSVSEGALVLLRCNYSSS-----VS-PYLFWYVQYPNQGLQLLLKY
TSG---TT--LV---KGINGFEAEFKKSETSFHLT------KP-SAHVSDTAQYFCAVS-
-----
>V143RF-ABGA01083937.1-trav |(4214, 4504)|2.97988400513|(0.991,0.993,0.996)|-1
--VNGENVEQHPSTLSVQEGDSSVIKCTYSDS-----AS-NYFPWYKQEVGKGPQFIIDI
RSN---MG--EK----KDQRITVILNKTAKHFSLH------IT-ETQPGDSAVYFCAAS-
-----
>V145RF-ABGA01083939.1-trav |(4457, 4751)|2.99696400065|(1.000,1.000,0.997)|-1
-GINGDSVVQTEGQVLLSEGDSLIVNCSYETT-----QY-PSLFWYVQYPGEGPQLLLKA
MKA---ND---K---GRNKGFEATYRKETTSFHLE------KD-SVQESDSAVYFCALS-
-----
>V146RF-ABGA01083939.1-trav |(18067, 18360)|2.99696400065|(1.000,0.997,1.000)|-1
-GSGKNQVEQSPQSLIILEGKNCTLQCNYTVS-----PF-SNLRWYKQDTGRGPVSLTIM
TFS---EN--TK----SNGRYTATLDADTKQSSLH------IT-ASQLSDSASYICVVS-
-----
>V147RF-ABGA01083939.1-trav |(34050, 34338)|2.9690773318|(1.000,0.980,0.991)|-1
VWSQQKEVEQDPGPFNVPEGATVAFNCTYSNS-----AS-QSFFWYRQDCRKEPKLLMSV
YSS---G---N-----ENGRFTAQLNRASQYISLL------IR-DSQLSDSATYLCAV--
-----
>V148RF-ABGA01083939.1-trav |(39521, 39818)|2.84875676613|(0.968,0.930,0.957)|-1
-GTRAQSVTQLDSHVPVSEGTRVLLRCNYSSS-----YS-PSLFWYVQHPNQGLQLLLKY
LSG---PT--LV---KGINGFEAEFKKSETSFHLT------KS-SAHVSDAAEYFCAMS-
-----
>V149RF-ABGA01113129.1-trav |(4972, 5260)|2.91558488932|(0.973,0.950,0.997)|-1
--VKSQKIEQNSEALNIQEGKTATLTCNYTNY-----SP-TYLQWYRQDPGRGPVFLLLI
REN---EK--EK----RKERLKVSFDTTLKQSLFH------IT-ASQPADSATYFCAL--
-----
>V150RF-ABGA01113130.1-trav |(6720, 7010)|2.97766002957|(0.997,0.990,0.991)|-1
-MSRGEDVEQTL-FLSVQEGDSSVINCTYTDS-----SS-TYLYWYKQEPGAGLQLLTYI
FSN---MD--LK----QDQRLTVLLNKKDKHLSLR------IA-DTQTGDSAIYFCAEH-
-----
>V151RF-ABGA01113133.1-trav |(15271, 15560)|2.86225977111|(0.978,0.924,0.972)|-1
-----QSVAQPEDEVTVAEGNPLTVKCTYSVS-----GN-PYLFWYIQYPNEGLQFLLKY
ITG---DN--LV---KGSYGFEAEFNKSQTSFHLK------KP-SALVSDSALYFCAVRD
-----
>V152RF-ABGA01132346.1-trgv |(695, 1008)|2.89729158631|(0.997,0.968,0.946)|-1
-SQKSSNLEGGTKSVTRPTRSSAEITCDLTVT-----NA-LYIHWYLHQEGKAPQRLLYY
DVS---TARDVLESGLSPGKYYTHTP-RRWSWILR------LQ-NLIENDSGVYYCATWD
-----
>V154RF-ABGA01154386.1-igkv |(10957, 11257)|2.76737097099|(0.991,0.999,0.852)|-1
-ARCDIQMTQSPSSLSASVGDRVTITCRASQGIS------SWLAWYQQKPGKAPKPLIYK
V---------SSLESGIPSRFSGSE--SGTEFTLT------IS-SLQPEDFATYYCQQYN
SVP--
>V155RF-ABGA01161530.1-igkv |(226, 526)|2.99396400065|(0.997,1.000,0.997)|-1
-IRCDIQMTQSPSSLSASVGDRVTITCRASQGIS------NYLNWYQQKPGKAPKLLIYR
A---------SNLQTGVPSGFSGSG--SGTDFTLT------IS-SLQPEDIATYYCQQYD
NLP--
>V157RF-ABGA01180641.1-igkv |(2646, 2946)|2.98686400565|(0.993,0.998,0.996)|-1
-ARCDIQMTQSPSSVSASVGDRVTITCRASQSIS------SWLAWYQKKPGKAPKLLIYK
A---------SSLQSGVPSRFSGSG--SGTEFTLT------IS-SLQPEDFATYYCTQHN
SYS--
>V158RF-ABGA01180644.1-igkv |(8050, 8350)|2.99798400013|(1.000,0.998,1.000)|-1
-ARGDIQMTQSPSSLSASVGDRVTITCRASQSIS------SYLAWYQQKPGKAPKPLIYA
A---------SNLQSGVPSRFSGSG--SGTEFTLT------IS-SLQPEDFATYYCQQYK
SDP--
>V159RF-ABGA01180644.1-igkv |(24182, 24473)|2.9808400105|(0.991,0.997,0.993)|-1
----DIQMTQSPSSVSASVGDRVTISCRASQSIS------SWLAWYQKKPGKAPKLLIYK
A---------SSLQSGVPSRFSGSG--SGTEFTLT------IS-SLQPEDFATYYCTQHN
SYP--
>V161RF-ABGA01203420.1-ighv |(3238, 3560)|2.97795641525|(1.000,0.994,0.985)|-1
-VQCEVQLVE-SGGGLVQPGGSLRLSCAASGFT-V---SSNEMSWIRQAPGKGLEWVSTI
SR--G-GS--TYYTDSVKGRFTISRDNSKNTLYLQ------MN-SLRVEDTAVYYCARDT
VKG--
>V163RF-ABGA01223433.1-trbv |(4452, 4749)|2.97597252412|(0.998,0.982,0.997)|-1
--PVNAGVTQTPKFHVLKTGQSMTLQCAQDMN-------HDYMSWYRQDPGMGLRLIHYS
AGA---GI--TDKGE-VPNGYNVSRLN-TEDFQLR------LE-SAAPSQTSVYFCASSY
-----
>V164RF-ABGA01225869.1-trbv |(7999, 8296)|2.87951574615|(0.995,0.941,0.960)|-1
--PLEAQVTQNPRYLITVTGKKLKVTCSQNMN-------HEYMSWYRQDPGLGLRQIYYS
MNV---EV--VDKGD-VPEGYNVSRKE-KRNFPLI------LE-SPSPNQTSLYFCASSL
-----
>V167RF-ABGA01252206.1-iglv |(13174, 13484)|2.89329307797|(0.979,0.951,0.967)|-1
-SWDQSALIQ-PPSMSGSPGQSVTISCTGTSS---DVGGYNYVSWYQQHPGTAPKLMIYA
V---------SNQPSGVPNRFSGSK--SGNTASLT------IS-GLQAEDEADYYCSSYA
GSNN-
>V170RF-ABGA01252215.1-iglv |(9236, 9539)|2.92525869849|(0.986,0.947,0.999)|-1
-SEASYELTQ-PPSVSVSPGQTARITCS---G---DALPKKYAYWFQQKSGQAPVLVIYK
D---------SKRPSGIPERFSGSS--SGTMATLT------IS-GAQVEDEADYYCYSTD
SSGNH
>V171RF-ABGA01252216.1-iglv |(11892, 12202)|2.75676332173|(0.973,0.914,0.903)|-1
-SWAQSALTQ-PRSVSGSPGQSVTISCTGTSS---DIGGYNAVSWHQQHPGKAPKLMIYD
V---------SNRPSGVPNRFSGSK--SGNMASLT------IS-GLQAEDEADYYCSSYA
GSYT-
>V172RF-ABGA01252218.1-iglv |(480, 780)|2.96178066996|(0.992,0.975,0.996)|-1
-SVTSYELTQ-PHSVSVATAQTARITCG---G---NNIGSKAVHWYQQKPGQAPVLVIYD
D---------SNQPSGIPERFSGSN--SGNTATLT------IS-GAQAGDEADYYCQVWD
SSKH-
>V173RF-ABGA01252219.1-iglv |(2097, 2400)|2.95656408064|(0.990,0.987,0.980)|-1
-SATSYELTQ-PPSVSVAPRQTARITCG---G---NNIGSKSVHWYQQKPGQAPVLVIYG
D---------SNRPSGISERFSGSN--SGNTATLT------IS-RVEAGDEAVYYCQVWD
SSSDY
>V174RF-ABGA01252219.1-iglv |(9992, 10295)|2.96989600501|(0.992,0.987,0.991)|-1
-SATSYELTQ-PPSVSVAPRQTARITCG---G---NNIGSKSVHWYQQKPGQAPVLVIYG
D---------SDRPSGISERFSGSN--SGNTATLT------IS-RVEAGDEAVYYCQVWD
SSSDY
>V175RF-ABGA01252219.1-iglv |(17960, 18263)|2.87184532288|(0.996,0.910,0.995)|-1
-SVVSSELTQ-DPAVSVTLGQTVKITCQ---G---DSLRSYYASWYQQKPGQAPVLVIYG
N---------NNRPSGIPDRFSGAS--SGNTASLT------IT-GAQAEDEADYYCNSWD
GSGNH
>V176RF-ABGA01252219.1-iglv |(34167, 34477)|2.98356408064|(0.997,1.000,0.987)|-1
-SWAQSALTQ-PPSVSGSPGQSITISCTGTSS---DVGGYNYVSWYQQHPGTAPKLMIYD
V---------SKRPSGVPDRFSGSK--SGNTASLT------IS-GLQTEDEADYYCSSYR
SGDT-
>V177RF-ABGA01252219.1-iglv |(46613, 46923)|2.98998400013|(0.996,0.998,0.996)|-1
-SWAQSALTQ-PASVSGSPGQSITISCTGTSS---DVGGYNYVSWYQQHPGKAPKLMIYD
V---------SKRPSGVPDRFSGSK--SGNTASLT------IS-GLQAEDEADYYCSSYR
SGST-
>V178RF-ABGA01252219.1-iglv |(70767, 71077)|2.95111198542|(0.997,0.997,0.962)|-1
-SWAQSALTQ-PPSVSGSPGQSITISCTGTSS---DIGGYNAVSWYQQHPGKAPKLMIYE
V---------SKRPSGVPDRFSGSK--SGNTASLT------IS-GLQAEDEADYYCSSYR
SGGT-
>V183RF-ABGA01252241.1-iglv |(8984, 9293)|2.93258443703|(0.992,0.952,0.995)|-1
-SWAQSVLTQ-PPSASGTPGQRVTISCSGSSS---NIG-SNYVYWYQQFPGMAPKHLIYD
N---------NQQPSGVPDRFSGSK--SGTSASLA------IS-GLRSKDEADYYCAAWD
NSLSG
>V185RF-ABGA01252243.1-iglv |(44201, 44510)|2.9188502378|(0.965,0.968,0.988)|-1
-SWAQSVLTR-PPSVSAAPGQKVTISCSGSSS---NIG-NYAVSWYQQLPGTAPKLLIYE
N---------NKRPSGISDRFSGSK--SGTSATLG------IT-GLQTGDEADYYCSAWD
SSLSA
>V186RF-ABGA01252243.1-iglv |(49802, 50111)|2.96016627772|(1.000,0.978,0.985)|-1
-SWAQSVLTQ-PPSASGTPGQRVTISCSGSSS---NIG-SNYVYWYQQFPGMAPKLLIYD
N---------NQRPSGVPDRFSGSK--SGTSASLA------IS-GLRSEDEADYYCAALD
NSLSG
>V188RF-ABGA01252248.1-iglv |(12457, 12769)|2.92103383388|(0.993,0.943,0.995)|-1
-SWAEVVFTQ-PHSVSGSPGQTVTISCTRSSG---SID-NRYVYWYQQRPGSAPTTVIYD
D---------NQRPSGVPDRFSGSIDSSSNSASLT------IS-GLKSEDEADYYCQSAN
DSHN-
>V194RF-ABGA01257772.1-igkv |(3885, 4185)|2.99899600001|(1.000,0.999,1.000)|-1
-ARCAIQMTQSPSSLSASVGDRVTITCRASQGIS------NELSWYQQKPGQAPTLLIYA
A---------SSLQSGVPSRFSGSG--SGTDFTLT------IS-SLQPEDVATYYCLQDY
TTP--
>V196RF-ABGA01259417.1-trbv |(2271, 2571)|2.94777334931|(0.985,0.999,0.966)|-1
--HADTGVSQDPRHKITKRGQNVTFRCDPISE-------HNRLYWYRQTLGQGPEFLTYF
QNE---AQ--QEKSGLFSDQFSAERPK-GSFSTLK------IQ-RTEQGDSAMYLCASSL
-----
>V197RF-ABGA01276916.1-igkv |(1327, 1627)|2.99798400013|(1.000,0.998,1.000)|-1
-ARCDIQMTQSPSSVSASVGDRVTITCRASQSIS------SWLAWYQQKPGKAPKLLIYK
A---------SNLQSGVPSRFSGSG--SGTDFTLT------IS-SLQPEDFATYYCIQHS
STP--
>V201RF-ABGA01277802.1-trbv |(6147, 6443)|2.9858720041|(0.998,0.994,0.994)|-1
--PVDSGVTQTPKHLITATGQRVTLRCSPRSG-------DLSVYWYQQSLDQGLQFLIQY
YNG---EE--REKG-NILERFSAQQFP-DLHSELN------LS-SLELGDSALYFCASSV
-----
>V204RF-ABGA01277808.1-trbv |(1866, 2166)|2.89851087214|(0.984,1.000,0.928)|-1
--HTGAGVSQSPSNKVTEKGKDVELRCDPISG-------HTALYWYRQSLGQGLEFLIYF
QGN---SA--PDESGLPSDRFYAERSG-GSISTLK------IQ-HTQQEDSAMYLCASSL
-----
>V205RF-ABGA01277809.1-trbv |(3151, 3448)|2.8477004391|(0.998,0.980,0.905)|-1
--PLDTAVSQTPKYLVTQMGKKESLKCEQNLG-------HDAMYWYKQDSKKFLKIMFIY
NNK---EP--ILNET-VPNRFSPNSPD-KAHLQLH------IS-SLELGDSAVYFCASSQ
-----
>V206RF-ABGA01277809.1-trbv |(14738, 15029)|2.97097652411|(0.996,0.996,0.980)|-1
----NAGVTQIPKFRVLKTGQSMTLQCAQDMN-------HDYMYWYRQDPGMGLRLIHYS
AGE---GT--TTKGE-VPDGYNVSRLK-KQNFLLG------LE-SAAPSQTSVYFCASSY
-----
>V207RF-ABGA01277810.1-trbv |(2890, 3187)|2.96160565256|(0.997,1.000,0.968)|-1
--PVNAGVTQTPKFQVLKTGQSMILQCAQDMN-------HDYMYWYRQDPGMGLRLIHYS
LDV---GT--TDKGE-VPDGYNVSRLN-IQNFLLR------LE-SAAPSQTSVYFCASSE
-----
>V208RF-ABGA01277810.1-trbv |(5526, 5817)|2.90565800141|(0.998,0.996,0.930)|-1
----NAGVTQTPKFRVLKTGQSITLQCAQDMN-------HNSMYWYRQDPGMGLRLIHYS
VGA---HS--TEKGE-VPDGYNVSRLN-TQNFLLR------LK-SAAPSQTSVYFCASSE
-----
>V210RF-ABGA01277815.1-trbv |(5061, 5368)|2.98294800078|(0.996,0.994,0.993)|-1
--PVNAGVTQTPKFQVLKTGQSMTLQCAQDMN-------YDNMYWYRQDPGMGLKLIHYS
VGE---GT--TDKGE-VPDGYNVSRLN-RQNFLLR------LE-SAAPSQTSVYFCASGY
STA--
>V213RF-ABGA01277827.1-trbv |(7144, 7457)|2.67696800013|(0.932,0.944,0.837)|-1
--PIDTEVTQTPKHLVMGMTNKKSLKCEQHMG-------HRTMYWYKQKAKKPPELMFAY
SYE---KL--SINES-VPSRFSPECPK-SSLLNLH------LH-ALQPEDSALYLCASSQ
DTALQ
>V219RF-ABGA01277831.1-trbv |(20035, 20348)|2.71465670404|(0.896,0.966,0.874)|-1
--PIDTGITQTPKHLVMGMANKKSLKCEQHMG-------HKAMYWYKQKVKKPPELMFVY
NYE---EL--SINES-VPSRFSPECPK-SSLLNLH------LH-ALQPEDSALYLCASSQ
DTALQ
>V221RF-ABGA01315458.1-igkv |(1340, 1640)|2.72897466861|(0.992,0.974,0.846)|-1
-TTGEIVMTQSPATLSLSPGERATLSCRASQSVS------NYLAWYQQKPGQAPRLLIYG
A---------SNRATGIPARFSGSG--SGTDFTLT------IS-SLEPEDFAVYYCQQGN
NLP--
>V224RF-ABGA01321068.1-trav |(6457, 6745)|2.97955704207|(1.000,0.981,1.000)|-1
-LSGELKVGQNPLFLSTQEGKNYTIYCNYSTT-----S--DRLYWYRQDPGKSLESLFVL
LSN---GA--VK----QEGRLMASLDTKARLSTLH------IT-AAVHDLSATYFCAV--
-----
>V225RF-ABGA01321070.1-trav |(796, 1096)|2.99496000066|(0.999,1.000,0.996)|-1
-FSMAQTVTQSQPEMSVQEAETVTLSCTYDTS-----ESDYYLFWYKQPPSRQMILVIRQ
EAY---KQ--QN---ATENRFSVNFQKAAKSFSLK------IS-DSQLGDAAMYFCAYR-
-----
>V226RF-ABGA01321072.1-trdv |(3234, 3535)|2.67763550384|(0.988,0.981,0.818)|-1
-SSMAQTVTQSQPEMSVQEAETVTLSCTYDTS-----ESNYYLFWYKQPPSRQMILVIRQ
EAY---KQ--QN---ATENRFSVNFQKAVKSFSLK------IS-DSQLGDTAMYFCAFM-
-----
>V234RF-ABGA01360476.1-ighv |(4349, 4657)|2.82739727933|(0.950,0.949,0.930)|-1
-AHSQVQLVQ-SGAEVKKPGTSVKISCKASGYT-F---TSYYMHWVRQAPGQGLEWIGRI
NPN--SGN--TNYAQKFQGRVAMTRDTSISTAYME------LR-SLRSEDTATYYCGE--
-----
>V235RF-ABGA01360478.1-ighv |(1164, 1473)|2.77643192639|(0.918,0.890,0.995)|-1
-AHSQVQLVQ-SGAEVKKPGASVKFSCKASGYT-F---TDYFMHWMLQAPGQRLEWMGWI
SAG--NGN--TKYSQKFQGRVTITRDTSASTAYME------LS-SLRSEDTAVYYCVR--
-----
>V1RF-AHZZ01030316.1-trgv |(43861, 44177)|2.96466265282|(0.998,0.974,0.995)|1
-SQKSSNLEGRTKSVTRPTGSSAEITCDLPEV-----SS-FYIHWYLHQEGKAPQRLLYY
DSS---NSRVVLESGISPGKYDTYGSTRRRNLRLI------LR-NLIENDSGVYYCANWD
-----
>V2RF-AHZZ01035404.1-trdv |(2190, 2491)|2.48654908529|(0.945,0.752,0.929)|1
-SGMAQTVTQSQPEMSVREAETMTLSCTYDTS-----ESNYYLFWYKQPPSRQMILIIRQ
EAY---KQ--QN---ATENRFSVNFQKAAKSFSLK------IS-DSQLGDAAMYFCAFM-
-----
>V3RF-AHZZ01035404.1-trav |(11684, 11986)|2.97323355494|(0.999,0.978,0.998)|1
-SGMAQTVTQSQPEMSVQEAETVTLSCTYDTS-----DSDYYLFWYKQPPSRQMILIIRQ
EAY---KQ--QN---ATENRFSVNFQKAAKSFSLK------IS-DSQLGDAAMYFCAYRS
-----
>V4RF-AHZZ01035404.1-trav |(35215, 35503)|2.96653206285|(0.990,0.981,0.996)|1
-LSGELKVGQNPLFLSTQEGKNYTIYCNYSTA-----S--NRLYWYRQDPGKSLESLFVL
LSN---GA--VK----QEGRLMASLDTKARLSSLH------IT-AALQDLSATYFCAV--
-----
>V8RF-AHZZ01040804.1-igkv |(44403, 44694)|2.97182866804|(0.996,0.979,0.998)|1
-----IVLTQSPTSMAVSQGERVTISCTASSSVS-----TSYLHWYQQKPGFPPRLLVYR
T---------SSLASGVPARFSGSG--SGTSYTLT------IS-SMEAEDAANYYCQQGN
SIP--
>V12RF-AHZZ01064615.1-ighv |(3396, 3696)|2.968900005|(0.988,0.993,0.988)|1
-VQCEVQLVE-SGGGLVQPGGSLRLSCAASGFT-F---SSYAMQWVHQTPGKGLEWVSAI
G---PGGD--TYYADAVKGRFTISRDNAKNSLYLQ------MN-SL--RAEAVYYCAR--
-----
>V14RF-AHZZ01064625.1-ighv |(10295, 10604)|2.77830555626|(0.969,0.869,0.980)|1
-VLSQVQLQE-SGPAVVKPSQTLSLTCAVSGGS-I--SSGYDWSWIRQSPGKALEWIGYI
SY---SGS--TNYNPSLKSRVTISRDTSKNQFSLK------LS-SVTAADTAVYYCAR--
-----
>V17RF-AHZZ01069449.1-ighv |(25634, 25949)|2.99899200002|(0.999,1.000,1.000)|1
-VQCEVQLVE-SGGGLVQPGGSLRLSCAASGFT-F---SNYWMNWVRQAPGKGLEWVGFI
KNKADGGT--AAYAESVKGRFTISRDDSKNTLYLQ------MN-SLKTEDTAVYYCTR--
-----
>V18RF-AHZZ01069451.1-ighv |(7153, 7468)|2.98664403777|(1.000,0.995,0.992)|1
-VQCEVQLVE-SGGGLVQPGRSLRLSCAASGFT-F---SNYYMHWVRQAQGKGLEWVGLI
RNKANSYT--TEYAAAVKGRFTISRDDSKNTLYLQ------MS-SLKTEDTAVYYCTT--
-----
>V20RF-AHZZ01069455.1-ighv |(6977, 7286)|2.87533612255|(0.953,0.935,0.996)|1
-VQCEVQLVE-SGGGLVQPGGSLRLSCAASGFT-F---SSYYMYWIRQAPGKGLQWVSAI
NTG--GGS--TWYTDSVKGRFTISRENAKNTLYLQ------MN-SLRAEDTAVYYCAK--
-----
>V24RF-AHZZ01069456.1-ighv |(9988, 10297)|2.99899600001|(1.000,1.000,0.999)|1
-VQCEVQLVE-SGGGLVQPGGSLRLSCAASGFT-F---SSYGMHWARQAPGKGLEWVSAI
NT--GGGS--TWYADSVKGRFTISRENAKNTLYLQ------MN-SLRAEDTAVYYCAK--
-----
>V26RF-AHZZ01091599.1-ighv |(2219, 2528)|2.99067605248|(1.000,0.991,1.000)|1
-VQCEVQLVE-SGGGLSKPGGSLRLSCAASGFT-F---SDYNMDWVRQASGKGLEWVSSI
NT--GGGS--TWYADSVKGRFTISRENAKNTLYLQ------MN-SLRAEDTAVYYCAR--
-----
>V29RF-AHZZ01091603.1-ighv |(4407, 4716)|2.96664005313|(0.991,0.982,0.994)|1
-VLSQVQLQE-SGPGLVKPSETLSLTCAVSGGS-I---SSNYWNWIRQPPGKGLEWIGRI
YGG--SGS--TDYSPSLKSRVTISTDTSKNQLSLK------LS-SVTAADTAMYYCAR--
-----
>V30RF-AHZZ01097944.1-iglv |(5376, 5682)|2.97741612211|(0.998,0.987,0.993)|1
--DSETVVTQ-EPSLSVSSGGTVTLTCGLSSG---SVSTSNYPSWYQQTPGQAPRTLIYR
T---------NTRPSGVPDRFSGSI--LGNKAALT------IT-GAQADDESDYYCMLYM
GSGI-
>V31RF-AHZZ01097949.1-iglv |(59447, 59759)|2.99899600001|(1.000,1.000,0.999)|1
-SWAEVVFTQ-PHSVSGSPGQTVTISCTRSSG---SID-SKYVQWYQQRPGSAPTTVIYE
D---------NKRPSGVPDRFSGSIDSSSNSASLT------IS-GLNSEDEADYYCQSAD
GSYN-
>V32RF-AHZZ01098200.1-trav |(876, 1169)|2.98993600205|(0.998,0.994,0.998)|1
VWSQQKEVEQNPGPLSVPEGATASLNCTYSNS-----AF-QNFMWYRQYSRKGPQLLIYT
YSS---GN--K-----EEGRFTAQVDKSSKYISLF------IR-DSQPSDSATYFCAMS-
-----
>V34RF-AHZZ01098200.1-trav |(35496, 35783)|2.9771523093|(0.996,1.000,0.982)|1
--VNSQQGEEDPQTLSIQEGENATMNCSYKTS------I-NNLQWYRQDSGRSLVQLILI
CSN---ER--EK----NSGRLRVTLDTSKKSSSLL------IT-ASRAADTASYFCATD-
-----
>V35RF-AHZZ01098200.1-trav |(47312, 47603)|2.80204466822|(0.921,0.928,0.959)|1
-RTNGDLVTQTEGPVTLPERAALTLNCTYQTS-----YS-AFIFWYVQYPNKEPELLLKS
S-E---NQ---E---TNSRGFQASHDKSDSSFHLE------KP-SVQLSDSAVYYCVLR-
-----
>V36RF-AHZZ01098200.1-trav |(50539, 50842)|2.92360004313|(0.970,0.978,0.976)|1
-SSMAQKVTQAQTEISVVEKEDVTLDCVYETR-----ENTYYLFWYKQPPSGELVFLIRR
NSF---DE--QN---EMNGRYDSNFQKSTSSFNLT------IT-ASQVVDSAVYFCALNE
-----
>V37RF-AHZZ01098200.1-trav |(85982, 86269)|2.83564593441|(0.966,0.915,0.965)|1
-LSGEDQVMQSPEALSLQEGESSSLNCSYTVS-----GL-RGLFWYRQDPGKGPEFLFSL
YSA---GE--EK----EKERLKATLTKKE--SFLH------IT-GPKPEDSATYLCAVQ-
-----
>V39RF-AHZZ01098942.1-ighv |(3874, 4183)|2.96860007999|(0.993,0.983,0.993)|1
-VLSQVQLQE-SGPGLVKPSETLSLTCAVSGGS-F---SSNYWSWICQPPGKGLEWIGGI
YGS--GGS--TYYNPSLKNRVTISTDTSKNQFSLK------LS-SVTAADTAVYYCAR--
-----
>V40RF-AHZZ01098950.1-ighv |(183, 495)|2.99385601037|(1.000,0.994,1.000)|1
-VLSQVQLQE-SGPGLVKPSETLSLTCAVSGYS-IS-S-GYYWGWIRQPPGKGLEWIGYI
YGN--SAS--TYYNPSLKSRVTISKDTSKNQFSLK------LS-SVTAADTAVYYCAR--
-----
>V41RF-AHZZ01099970.1-iglv |(6343, 6653)|2.99899600001|(1.000,1.000,0.999)|1
-SWAEVVFTQ-PHSVSGSPGQTVTISCTRSSG---SID-SKYVQWYQQRPGSAPTTVIYN
D---------DQRPSGVPDRFSGSIDSSSNSASLT------IS-GLKSEDEADYYCQSAD
SSS--
>V44RF-AHZZ01099973.1-iglv |(38400, 38710)|2.98771202074|(1.000,0.994,0.994)|1
-SWAQSVLTQ-PPSVSGAPGQRVTISCTGSSS---NIGAGYYVSWYQQLPGTAPKLLIYE
N---------NKRPSGVSDRFSGSK--SGTSASLA------IT-GLQAEDEADYYCQSYD
SSLS-
>V45RF-AHZZ01100290.1-ighv |(204, 517)|2.77808270069|(0.979,0.875,0.967)|1
-VQCEVQLVE-SGGGLVQPGRFLRLSCAASGFT-F---SNYYMHWAHQAQGRGLEWVSLM
RKKANSYT--TEYAVSVKDRFTISRDDSKNTLYLQ------MN-SLKTEDTAVYYCA---
-----
>V47RF-AHZZ01104241.1-igkv |(24888, 25186)|2.76439853397|(0.991,0.851,0.998)|1
-SKGEIVLTQSPAFRSVTLKEKVTITCQASQSIG------SSLHWYQQKPDRSPKLLIKY
A---------SQSISGVPSRFSGSG--SGTDFTLT------IN-SLEAEDAATYYCQQSS
SL---
>V48RF-AHZZ01104241.1-igkv |(53164, 53464)|2.96843912445|(1.000,0.975,0.996)|1
-TSGEIVLTQSPATLSLSPGERATLSCRASQSVG------SSLAWYQQKPGQAPRLLIYG
A---------SSRATGIPDRFSGSG--SGTEFTLT------IS-SLEPEDFVVYYCQKYS
SSP--
>V49RF-AHZZ01104241.1-igkv |(58624, 58924)|2.9878720041|(0.996,1.000,0.992)|1
-VRCDIQMTQSPSFLSASVGDRVTITCQASQSIS------NDLAWYQQKPGKSPTLLIYD
A---------TNLHTGVPSRFSGSG--SGADYSLT------IS-SLELEDFAAYYCQQEY
SYP--
>V51RF-AHZZ01104243.1-igkv |(37856, 38148)|2.88136248136|(0.995,0.913,1.000)|1
-SRGDIVMTQSPAFVSVTPGEKVTITCQASEGIS------NYLHWYQQKPDQAPKLFIQY
A---------SQSISGVPSRFTGSG--SGTDFTFT------IS-SLEVEDAATYYCQQGN
-----
>V52RF-AHZZ01104243.1-igkv |(54085, 54379)|2.9803601679|(0.999,0.987,0.995)|1
--RGDIQMTQSPSSLSASVGDRVTITCRASQSF-------SSLAWYQQKPGKAPKLLIYS
A---------SSLQSGVPSRFSGSK--SGTDFTLT------IS-SLQPEDVASYYCQQYY
SYP--
>V53RF-AHZZ01104243.1-igkv |(69226, 69518)|3.0|(1.000,1.000,1.000)|1
-AKCDIQMTQSPSSLSASVGDRVTITCRASQTIS------SYLAWYQQKPGKVPKLLIYA
A---------SSLESGVPSRFSGSG--SGTEFTLT------IS-SLQPEDFATYYCQQHN
-----
>V55RF-AHZZ01104761.1-ighv |(4083, 4398)|2.95754805197|(0.981,0.988,0.989)|1
-VKCEAQLME-SGGGLVQPGGSLRLSCAASGFT-F---SDHYMQWVRQAPGKGLEWVGLI
RNKADGET--TDYAASVKGRVTTSRDDSKSITYLQ------MN-NLKTEDTAVYYCAR--
-----
>V56RF-AHZZ01104763.1-ighv |(4374, 4683)|2.99593600205|(1.000,0.996,1.000)|1
-VQCEVQLVE-SGGGLAKPGGSLRLSCAASGFT-F---SDYYMDWVRQAPGKALEWVSGI
SNT--GGS--TWYADSVKGRFTISRENAKNTLYLQ------MS-SLRAEDTAVYYCAR--
-----
>V57RF-AHZZ01105091.1-igkv |(457, 757)|2.98159608|(0.997,0.998,0.987)|1
-ARCDIQMNQSPSSLSASVGDTATITCRASQGIS------NNLAWYQQKPGKAPKLLIYA
A---------SSLESGVPSRFSGSG--SGTEFTLT------IS-SLQPEDFAAYYCQQYN
SLP--
>V58RF-AHZZ01107544.1-trav |(5301, 5591)|2.98780001921|(0.998,0.999,0.991)|1
--VNGENVEQHPSTLSVQEGDSSVIKCTYSDS-----AS-NYFPWYKQELGKGPQFIIDI
RSN---EH--EK----KDQRITVLLNKTAKHFSLH------IT-ETQPGDSAVYFCAAS-
-----
>V59RF-AHZZ01107544.1-trav |(27803, 28091)|2.97560803841|(0.992,0.985,0.999)|1
VWS-QQKVEQSSGPLSVPEGAIASLNCTYSDS-----GS-QSFFWYRQYSGQSPELLMST
YSS---GD--K-----EDGRFTAQLNRASQYVSLL------IR-DSQLSDSATYLCAV--
-----
>V61RF-AHZZ01107544.1-trav |(53747, 54040)|2.99393200206|(0.999,1.000,0.995)|1
-VSRGESVGLHLPTVSVQEGDNSVINCTYSDS-----AS-DYFLWYKQESGKGPQSIIDI
RSN---MA--KR----QGQRLTVLLNKTMKHLSLQ------IA-ATEPGDSAVYFCAEN-
-----
>V62RF-AHZZ01107545.1-trav |(4983, 5284)|2.94957605748|(0.982,0.991,0.977)|1
-SGIAQKITQTQPAMFVQEKEAVTLDCTYDTS-----DQNYGLFWYKQPSSGEMIFLILQ
MSY---DK--QN---ATEGHYSLNFQKARKSVNLV------IS-ASQVGDSATYFCAMR-
-----
>V63RF-AHZZ01107545.1-trav |(23299, 23593)|2.99593600205|(1.000,1.000,0.996)|1
-RTRGDSVTQMEGPVTLSERAFLTINCTYTAT-----GY-PSLFWYVQYPGEGPQLLLKA
TKT---DE---K---GSNKGFEATYRKETTSFHLK------KD-SVQESDSAVYFCALS-
-----
>V65RF-AHZZ01109397.1-igkv |(45, 345)|3.0|(1.000,1.000,1.000)|1
-ARCDIQMTQSPSSLSASVGDRVTITCRASQGIS------SYLNWYQQKPGKAPKLLIYD
A---------TTLQSGVPSRFSGSG--SGTEFTLT------IS-SLQPEDFAVYYCQQRN
SYP--
>V66RF-AHZZ01109397.1-igkv |(20176, 20476)|2.99699200002|(0.999,1.000,0.998)|1
-ARCDIQMTQSPSSLSASVGDRVTITCQASQGIS------SWLSWYQQKPGKAPKLLLYK
A---------SGLQSGVPSRFSGSG--SGTEFTLT------IS-SLQPEDFATYYCQQFS
SAL--
>V67RF-AHZZ01109398.1-igkv |(3225, 3525)|2.98867205249|(0.999,0.990,1.000)|1
-TTGEIVMTQSPATLSLSPGERATLSCRASQSVS------SRLAWYQQKPGQAPRLLIYD
A---------SSRATGIPDRFSGSG--SGTEFTLT------IS-SLEPEDVGVYYCQQSY
SWP--
>V72RF-AHZZ01117753.1-igkv |(3232, 3532)|2.98008440501|(0.998,1.000,0.983)|1
-ARCDIQMTQSPSSLSASVGDRVTITCRASQGIS------TYLNWYQQKPGKAPKLLIYA
A---------SRLESGVPPRFSGSG--SGTEFTLT------IS-SLQPEDFATYYCLQYK
SDP--
>V73RF-AHZZ01117754.1-igkv |(5922, 6221)|2.99899600001|(1.000,1.000,0.999)|1
-TTGEIVMTQSPATLSLSPGERATLSCRASQSVS------SYLAWYQQKPGQAPRLLIYG
A---------SSRATGIPDRFSGSG--SGTEFTLT------IS-SLEPEDVGVYYCQQYN
NWN--
>V77RF-AHZZ01129142.1-ighv |(1012, 1321)|2.99799600001|(0.999,0.999,1.000)|1
-VLSQVQLQE-SGPGVVKPSETLSLTCAVSGGS-I--S-SYWWGWIRQPPGKGLEWIGYI
YGS--GSS--TNYNPSLKSRVTISKDTSKNQFSLK------LS-SVTAADTAVYYCAR--
-----
>V79RF-AHZZ01143621.1-igkv |(14221, 14507)|2.72005121372|(0.887,0.907,0.938)|1
-----IVMTQSPATLSLSPGERATLSCRASQSVS------SRLAWYQQKPGEAPRLLIYD
A---------SSRATGIPARFSGSG--SGTDFTLT------IS-SLEPEDVAVYFCQQES
NW---
>V80RF-AHZZ01150255.1-ighv |(7064, 7379)|2.92298089753|(0.956,0.991,0.984)|1
-VQCEVQLLE-YGGGLVQPGRSLRLSCAVSGFT-F---SDHYMSWVRQAPGKGPEWVGFM
RNKANGGR--TEYAASVKGRFTISRDDSKSTASLQ------MS-SLKTEDTAVYYCAT--
-----
>V82RF-AHZZ01176978.1-igkv |(12153, 12453)|3.0|(1.000,1.000,1.000)|1
-ARCDIQMTQSPSSLSASVGDKVTITCHASQGIS------SWLSWYQQKPGKAPKLLIYK
A---------SSLQSGVPSRFSGSG--SGTDYTLT------IS-SLQPEDFATYYCQQDS
SSP--
>V83RF-AHZZ01198213.1-trav |(10234, 10524)|2.9793601679|(0.996,1.000,0.984)|1
-MSRGEDVEQSL-FLSVREGDISVINCTYTDS-----SS-TYLYWYKQEPGAGLQLLTYI
LSN---MD--LK----RDQRVTVLLNKKDKHLSLR------IA-DTQTEDSAIYFCAES-
-----
>V85RF-AHZZ01198214.1-trav |(53657, 53950)|2.99799600001|(0.999,0.999,1.000)|1
-GSGKNQVEQSPQSLIILEGKNCTLQCNYTVS-----PF-SNLRWYKQDTGKGPISLTIM
TFS---EN--TK----SNGRYTATLDADTKQSSLH------IT-AAQLSDSASYICVVS-
-----
>V86RF-AHZZ01198216.1-trav |(1076, 1382)|2.98128017622|(1.000,0.994,0.988)|1
VWSQQKEVEQDPGPFSVPEGATVTFNCTYSNS-----AS-QSFFWYRQDSRKEPKLLMSV
YSS---G---N-----EDGRFTAQLNRASQYISLL------IR-DSQLSDSATYLCAVYT
QCSP-
>V87RF-AHZZ01198216.1-trav |(6535, 6832)|2.72737229451|(0.995,0.852,0.963)|1
-GTRAQSVTQLDSQVSVSEGVPVLLRCNYSSS-----VS-PYLFWYVQYPNQGLQLLLKY
TSG---TT--LV---KGINGFEAEFKKSETSFHLT------KA-SAHVSDAAEYFCAVN-
-----
>V89RF-AHZZ01040804.1-igkv |(3190, 3490)|2.81183400054|(0.915,0.971,0.941)|-1
-TTGQVILTQSPATLSLSPGERATLSCRASQSVS------NYLAWYQQKPGQAPRLLIHS
A---------SSRATGIPDRFSGSG--SGTEFTLT------IS-SLEPEDVGVYHCYQYY
SGY--
>V92RF-AHZZ01040807.1-igkv |(39921, 40221)|2.97049912241|(0.999,0.974,1.000)|-1
-AKCDIQMTQSPTFLSASVGDRVTIACRASQSIH------KGLAWYQQKPGKAPKLLISY
A---------SNLYTGVPSRFSGSG--SGTDFTLT------IS-SLQPEDAATYYCFQYN
SYP--
>V93RF-AHZZ01040808.1-igkv |(17035, 17353)|2.96940127932|(0.997,0.977,0.997)|-1
-ACGDIVMTQSPDSLAVSLGERVTINCKSSQSLLYSSNNKNYLAWYQQKPGQTPKLLISW
A---------STRESGVPNRFSGSG--SGTDFTLT------IS-GLQAEDVAVYYCQQHY
STP--
>V96RF-AHZZ01042078.1-igkv |(13394, 13694)|2.97340170998|(0.980,0.997,0.999)|-1
-ARCDIQMTQSPSSLSASVGDRVTITCRASQNIY------SNLAWYQQKPGKAPKPLIYY
A---------SSLETGVPSRFRGSG--SGTDYTLT------IS-SLQPEDIATYYCQQYN
NSP--
>V100RF-AHZZ01042080.1-igkv |(4422, 4722)|2.97323355494|(0.999,0.978,0.998)|-1
-ARCDIQLTQSPSSLSASVGDRVTISCRTSQNIY------SNLAWYQQKPGKTPKLLIYA
A---------SSLQSGIPSRFSGSG--SGTDFTLT------IS-SLQPEDVATYYCQHGY
GTP--
>V103RF-AHZZ01042083.1-igkv |(18979, 19279)|2.97345609036|(0.986,0.992,0.996)|-1
-ARCDIHMTQSPSSLSASVGDRVTITCRASQGIT------DDLAWYQQKPGETPKLLIYE
A---------SSLQSGIPSRFSGSG--SGTEFTLT------IS-SLQLNDSATYYCQHYY
SYP--
>V105RF-AHZZ01042084.1-igkv |(28167, 28465)|2.97287023728|(1.000,0.998,0.977)|-1
-ARCDIQLTQSPSSLSASVGDRVTITCQASQGIS------NNLAWYQQKPGKVPKLLIYK
A---------STLQSGVPSRFSGSG--SGTDFTLT------IS-SLQPEDFATYYCQYGY
GI---
>V106RF-AHZZ01042085.1-igkv |(3468, 3783)|2.76939388998|(0.998,0.884,0.948)|-1
-TSGDIVMTQTPLSLPVSPGEPASISCRSSQSLLHS-DGYTYLDWYLQKPGQSPQLLIYL
V---------SNRASGVPDRFSGSG--SGTDFTLK------IS-RVEAEDVGVYYCEQGT
QLP--
>V108RF-AHZZ01042085.1-igkv |(49587, 49887)|2.99899600001|(1.000,0.999,1.000)|-1
-ARCDIQMTQSPSSLSASVGDRVTITCRASQGIT------NDLAWYQQKPGETPKLLIYE
A---------SSLQSGIPSRFSGSG--SGTDFTLT------IS-SLQPEDFATYYCQHYY
STP--
>V109RF-AHZZ01042091.1-igkv |(7298, 7613)|2.98672803289|(0.999,0.991,0.997)|-1
-TSGDIVMTQTPLSLSVTPGEPASISCRSSQSLLHS-NGNTYLHWYLQKPGQSPQLLIYL
V---------SNRASGVPDRFSGSG--SGTDFTLK------IS-RVEAEDVGVYYCMQGI
QLP--
>V111RF-AHZZ01042093.1-igkv |(34873, 35173)|2.97723755493|(1.000,0.979,1.000)|-1
-ARCDIQMTQSPSSLSASVGDRVTITCRASQGIN------KELDWYQQKPGKAPTLLIYA
A---------SSLQTGVSSRFSGSG--SGTDFTLT------IS-SLQPEDVATYYCQQDY
TTP--
>V115RF-AHZZ01042093.1-igkv |(102084, 102402)|2.7839563944|(0.994,0.911,0.925)|-1
-SSGDIVMTQTPLSLPVTPGEPASISCRSSQSLLDSDDGNTYLDWYLQKPGQSPQLLIYE
V---------SNRASGVPDRFSGSG--SDTDFTLK------IS-RVEAEDVGVYYCMQST
EYP--
>V119RF-AHZZ01042093.1-igkv |(133001, 133301)|2.96807231762|(0.983,0.989,0.997)|-1
-ARCDTQMTQSLSSLFASVGDRVTITCRASQGIN------NELAWYQQKPGKAPTLLLYS
G---------SSLHTGVPSQFSGSG--SGTDFTLT------IS-SLQPEDVATYYCRQDY
TTP--
>V121RF-AHZZ01042093.1-igkv |(150847, 151147)|3.0|(1.000,1.000,1.000)|-1
-ARCDIQMTQSPSSLSASVGDRVTITCQASQGIS------NNLNWYQQKPGKTPKLLIYA
A---------SSLQSGIPSRFSGSG--SGTDFTLT------IS-SLQPEDFATYYCQQRY
SAP--
>V123RF-AHZZ01042093.1-igkv |(173599, 173899)|2.98974003277|(0.999,1.000,0.991)|-1
-ARCDIQMTQSPSALSASVGDRVTISCRASQNIY------SGLAWYQQKPGKAPKLLIYD
A---------SGLQSGIPSQFSGSG--SGTDFTLT------IS-SLQPEDSATYYCQHYY
DTP--
>V129RF-AHZZ01067647.1-trbv |(24494, 24801)|2.98796400065|(0.997,0.997,0.994)|-1
--LVDVKVTQSSRYLIKRTGEKVFLECVQDMD-------HERMFWYRQDPGLGLRLIYFS
YDV---KV--NEKGD-IPEGYSVSREK-KERFSLI------LG-SASTNQTSMYLCASSL
STA--
>V131RF-AHZZ01067648.1-trbv |(3732, 4029)|2.92530342777|(0.976,0.998,0.955)|-1
--LMEADIYQNPRHRVIGTGKKITLECSQTMG-------HDKMYWYQQDPGMELHLIHYS
YGV---NS--TERGD-FSSESTVSRIR-IEHFPLT------LE-STSPSHTSQYLCASSE
-----
>V132RF-AHZZ01067649.1-trbv |(1785, 2085)|2.94821476928|(0.988,0.964,0.999)|-1
--HAEAGVSQDPRHKITKTGQNVSFKCVPISE-------HNRLYWYRQTLGQGPEFLTYF
QNE---AQ--QDRSGLFSDRFSAERPE-GSISTLM------IQ-HTEQGDSAVYLCASSL
-----
>V133RF-AHZZ01067649.1-trbv |(16676, 16973)|2.98351211712|(0.998,0.999,0.987)|-1
--HMDAGITQSPRHKITETGTPVTLRCHQTEN-------HRYMYWYRQDLGNGLRLIHYS
YGV---ED--TDKVE-ISDGYSVSRSK-TEDFLLT------LE-SATRSQTSVYFCASSE
-----
>V138RF-AHZZ01067649.1-trbv |(59401, 59701)|2.62643293044|(0.955,0.968,0.798)|-1
--HTEAGVTQFPSHRVIEKGQTVTLRCDPISG-------HDYLYWYRRVMGKEIKFLIYF
MRA---SV--QDESGMPNKRFSAERTG-GTYSTLK------VQ-PAELEDSGVYFCASSQ
-----
>V140RF-AHZZ01067649.1-trbv |(69483, 69783)|2.78776175207|(0.961,0.968,0.883)|-1
--SPGEEVTQTPKHLVKGEGQKAKLYCDPIKG-------HSYVFWYQQVLRKEFKFLISF
QNK---NV--FDETGMPKERFSAKCPA-NSPCSLE------IQ-ATKLKDSAVYFCASSQ
-----
>V141RF-AHZZ01067649.1-trbv |(89894, 90191)|2.89468723924|(0.996,1.000,0.921)|-1
--TVDGGITQSPKYLFRKEGQNVTLSCEQNLN-------HDAMYWYRQDPGQGLRLIYYS
QIV---ND--IQNGD-IAEGYSVSRDR-KESFPLT------VT-SAQRNPTAFYLCASSI
-----
>V144RF-AHZZ01067649.1-trbv |(129327, 129625)|2.93248011776|(0.973,0.976,0.984)|-1
--SMDADVTQTPRNSIAKTGKRIMLECSQTKG-------HDQMYWYRQDPGLGLRLIFYS
FDV---ED--INKGE-ISDGYSASRQE-QAKFSLS------LE-SATPNQTALYFCATSD
-----
>V145RF-AHZZ01067651.1-trbv |(1632, 1932)|2.99498000014|(0.998,0.997,1.000)|-1
--HTGAGVSQSPRYKVTKRGQDVALRCDPISG-------HDYLYWYQQALGQGPELLTYF
NYE---AQ--QDKSGLPNDRFSADRPE-GSVSTLK------IQ-RTEQRDSAVYLCASSL
-----
>V146RF-AHZZ01067651.1-trbv |(6692, 6982)|2.61461841225|(0.979,0.930,0.816)|-1
----DAGVTQSPTHLIKMRGQQVTLRCSPISG-------HTSVSWYQQALGQGPQLIFEY
DRK---EE--RVRG-NFLDRFSGRQFP-NYSSELN------VN-ASEMGDSALYLCASSL
-----
>V147RF-AHZZ01067651.1-trbv |(13303, 13600)|2.97974002125|(0.997,0.990,0.993)|-1
--PGNAGVTQTPKFQILKTGQSMTLQCAQDMN-------HNYMSWYRQDPGVGLRLIHYS
VGA---GV--TDKGE-VSNGYNVSRLN-TEDFPLS------LE-SAASSQTSVYFCASSY
-----
>V150RF-AHZZ01067651.1-trbv |(47891, 48187)|2.99596000066|(1.000,0.999,0.997)|-1
--PVDAGVTQSPTHLIKTRGQQVTLRCSPISG-------HTSVYWYQQALGQGPQFIFQY
YEK---EE--RERG-NFPDRFSGRQFP-NYSSELN------VS-ALLLGDSALYLCASSL
-----
>V151RF-AHZZ01067651.1-trbv |(55192, 55483)|2.9252426846|(0.990,0.984,0.956)|-1
----NADVTQTPKFRVLKTGQSMIVQCAQDMK-------HDYMFWYRQDPGMGLRLIYYS
VTA---GI--TTKGE-VPNGYNVSRIN-TEDFLLR------LE-SAALSQTSVYFCASSY
-----
>V152RF-AHZZ01067651.1-trbv |(59487, 59787)|2.9958720041|(0.996,1.000,1.000)|-1
--HTGAGVSQSPRYKVIKKGQDVALRCDPISG-------HAALYWYQQALGQGPEFLTYF
NYQ---AQ--PDKSGLPNDRFSAERSE-GSVSTLT------IQ-RTEQQDSAVYLCASSL
-----
>V154RF-AHZZ01067652.1-trbv |(695, 992)|3.0|(1.000,1.000,1.000)|-1
--PVNAGVTQTPKFQVLKTGQSMTLQCAQDMN-------HDCMYWYRQDPGMGLRLIHYS
VGE---GS--TDKGE-VPDGYNVTRSN-TEDFPLR------LE-SAAPSQTSVYFCASSY
-----
>V155RF-AHZZ01067652.1-trbv |(5225, 5525)|2.98328822908|(1.000,0.987,0.997)|-1
--HTGAGVSQSPRYKVTKRGQDVALRCDPISG-------HDYLYWYQQAPGQGPEFLTYF
QND---AQ--RDKSGLPNDRFSAERTE-GSVSTLK------IQ-RTEQADSAVYLCASSL
-----
>V158RF-AHZZ01067652.1-trbv |(24517, 24817)|2.98274003277|(0.992,1.000,0.991)|-1
--HTGAGVSQSPRYKVTKRGQDVALRCDPISG-------HVALYWYQQALGQGPEFLTYF
QND---AQ--PDKSGLPSDRFSAERPE-GSVSTLK------IQ-RTQQGDAAVYLCASSL
-----
>V160RF-AHZZ01067652.1-trbv |(38310, 38607)|2.92130107483|(0.978,0.986,0.959)|-1
--LVNAGVTQTPKFQVLKTGQSMTVQCAQDMN-------YNFMYWYRQDPGVGLRLIHYS
GAA---GT--TDKGE-VPSGYNVSRLN-TEIFPLR------LE-SAAPSQTSVYICASSY
-----
>V161RF-AHZZ01067652.1-trbv |(42887, 43187)|2.87695851388|(0.978,0.990,0.922)|-1
--HTGARVSQSPRYKVTKRGQDVALRCDPISG-------HDYLYWYQQALGQGPELLTYF
SYE---AQ--QDKSGLPSDRFSAERPE-GSVSTLK------IQ-RTQQWDSAMYLCASSL
-----
>V163RF-AHZZ01067653.1-trbv |(5340, 5640)|2.93613070699|(0.989,0.997,0.955)|-1
--HTGAGVSQSPSNKVTEKGKDVVLRCDPISG-------HAVLYWYRQNLGQGLEFLIYF
QGK---GA--VDDSGLCSDRFSATRPE-GSASTLK------IQ-HTEQGDSAMYFCASSL
-----
>V165RF-AHZZ01067653.1-trbv |(13070, 13360)|2.90114737884|(0.978,0.947,0.980)|-1
----DCGVTQTPKHLITAIGQQVTLRCSPRSG-------DLSVYWYQQSLGQGLQFLIQY
YNG---EE--RAKG-NILERFSAQQFP-DLHSELN------LS-SLELGDSALYFCASSL
-----
>V169RF-AHZZ01067655.1-trbv |(10936, 11249)|2.90763393453|(0.989,0.991,0.938)|-1
--SLDTAVSQTPKYLVTQTGKNESLKCEQNLG-------HNAMYWYKQDSKKLLKIMFIY
NNK---EP--ILNET-VPNRFSPKSPD-KAHLNLH------IK-SVELGDSAVYFCASSQ
DTALQ
>V171RF-AHZZ01067655.1-trbv |(26234, 26531)|2.97909640489|(0.998,0.999,0.983)|-1
--LVNAGVTQTPKFQVLKTGQNMTLKCAQDMN-------HDRMYWYRQDPGMGLRLIHYS
AGE---GS--TEKGE-VSNGYNASRLN-KKDFLLR------LE-SAAPSQTSMYFCASSE
-----
>V172RF-AHZZ01067655.1-trbv |(28925, 29222)|2.97567605248|(0.995,0.995,0.986)|-1
--PVNAGVTQTPKFQILKTGQNMTLKCAQDMN-------HNYMYWYRQDPGMGLRLIHYS
AGE---GS--TEKGE-VPDGYNASRLN-PQNFLLR------LE-SAAPSQTSMYFCASSE
-----
>V173RF-AHZZ01067655.1-trbv |(32665, 32965)|2.98696000066|(0.995,0.994,0.998)|-1
--HTGAGVSQSPRNKVTEEGKDVVLRCDPISG-------HTALYWYRQSLGKGLEFLIYF
QGN---DA--PDKSGLPSGRFSAERTE-GSVSTLK------IQ-RTEQGDSAVYLCASSL
-----
>V175RF-AHZZ01067656.1-trbv |(14292, 14589)|2.9660682612|(0.996,0.988,0.983)|-1
--PLDTAVFQTPKYLVTQTGKKESLKCEQNLG-------HDTMYWYKQDSKKLLKIMFIY
SNK---EP--ILNET-VPNRFSPDSPD-KAHLNLH------IK-SVELGDSAVYFCASSQ
-----
>V176RF-AHZZ01067656.1-trbv |(18626, 18923)|2.93548007169|(0.978,0.971,0.987)|-1
--PTDTGVTQTPKHLVMGMTNKKSLKCEQHLG-------HNAMYWYKQKAKKPPELMFIY
NYE---KL--SINES-VPSRFSPECSK-SSLLYLH------LR-ALQPEDSALYLCASSQ
-----
>V177RF-AHZZ01067656.1-trbv |(37172, 37469)|2.99599600001|(0.999,0.999,0.998)|-1
--PANADVTQSPKFQILKTGQSMTLQCAQDMN-------HNSMYWYRQDPGMGLRLIHYS
ATK---DT--TDPGE-VPDGYSVSRLN-KKEFLLK------LE-SAAPSQTSVYFCASSE
-----
>V179RF-AHZZ01069458.1-ighv |(21609, 21918)|2.93050296661|(0.990,0.993,0.953)|-1
-VQCEVQLVE-SGGGLVQPGASLRLSCEASGFT-F---GDYAMSWVHQAPGKGLEWVSSI
SY--TGKN--IYYADSVKGRFTISRDNAKNSLSLQ------MN-SLKTEDTAVYYCTR--
-----
>V180RF-AHZZ01069458.1-ighv |(26822, 27131)|3.0|(1.000,1.000,1.000)|-1
-VQCEVQLVE-SGGGLVQPGGSLRLSCAASGFT-F---SSYDMSWVRQAPGKGLEWVSYI
SN--GGGS--TYYADSVKGRFTISRDNSKNTLSLQ------MN-SLRAEDTAVYYCAK--
-----
>V181RF-AHZZ01069461.1-ighv |(27499, 27811)|2.98489600501|(0.993,0.998,0.994)|-1
-VLSQVQLQE-SGPGLVKPPETLSLTCAVSGGS-I--SDSYYWSWIRQPPGKGLEWIGYI
YGG--SGS--TSYNPSLKSRVTLSVDTSKNQFSLK------LS-SVTAADTAVYYCAR--
-----
>V183RF-AHZZ01084890.1-ighv |(9388, 9701)|2.98551611711|(0.999,0.999,0.988)|-1
-VQCEVQLVE-SGGGLVQPGGSLRLSCAASGFT-F---SNSWMNWVRQAPGKGLEWVARI
KSKADGET--ADYAASVKGRFTISRDDSKNTLYLQ------MN-SLKTEDTAVYYCT---
-----
>V187RF-AHZZ01084892.1-ighv |(32791, 33100)|2.95838667423|(0.999,0.999,0.965)|-1
-VQCEVQLVE-SGGGLVQPGGSLRLSCAASGFT-F---SDYWMDWVRQAPGKGLEWVSSV
S-G-SSSN--TYYPDSVKGRFTISRENAKNTLYLQ------MN-SLRAEDTAVYYCAR--
-----
>V188RF-AHZZ01084893.1-ighv |(12328, 12643)|3.0|(1.000,1.000,1.000)|-1
-VQCEVQLVE-SGGGLVQPGRSLRLSCAASGFT-F---SNYYMDWVRQAPGKGLEWVGRI
RNKANSYT--TEYAASVKGRFTISRDDSKNTLYLQ------MS-SLKTEDTAVYYCAR--
-----
>V191RF-AHZZ01089506.1-iglv |(37855, 38165)|2.9649882524|(1.000,0.973,0.995)|-1
-SLSQPVLTQ-PASLSASPGASARLTCTLSSG---INVGSYRIYWYQQKPGSPPRYLLNY
YSD---SD--KDQGSGVPSRFSGSKDASANAGLLL------IS-GLQSEDEADYYCAI--
-----
>V192RF-AHZZ01089506.1-iglv |(48570, 48877)|2.94726365316|(0.991,0.965,0.994)|-1
-SWAQSVLTQ-PPSVSAAPGQKVTISCSGSSS---NIG-SKYVSWYQQLPGTAPKLLIYD
N---------NKRPSGISDRFSGSK--SGTSATLA------IT-GLQTGDEADYYCAAWD
NSLS-
>V193RF-AHZZ01089506.1-iglv |(53590, 53897)|2.99493200206|(1.000,0.999,0.996)|-1
-SWAQSVLTQ-PPSVSGDPGQRVTISCTGSSS---NI-GGYYVYWYQQLPGTAPKLLIYD
N---------NKRPSGVSDRFSGSK--SGTSASLT------IT-GLQPGDEADYYCGAWD
SSLS-
>V194RF-AHZZ01089506.1-iglv |(59408, 59715)|2.9663881665|(0.992,0.995,0.980)|-1
-SRAQSVLTQ-PPSVSGAPGQKVTISCTGSSS---NIG-GYNVYWYQQLPGTAPKLLIYD
N---------NKRPSGISDRFSGSK--SGTSASLA------IT-GLLPEDEADYYCQSYD
SSLS-
>V196RF-AHZZ01089506.1-iglv |(88028, 88337)|2.97864403777|(0.994,0.986,0.999)|-1
-SWAQSVLTQ-PRSASEAARKSVTISCSGSSS---NIG-SNSVSWYQQLPGTAPKLLIYY
N---------DQRASGVSDRFSGSK--SGTSASLA------IS-GLQTEDEADYYCTAWD
DSLSG
>V200RF-AHZZ01089508.1-iglv |(11286, 11596)|2.7371420013|(0.991,0.862,0.954)|-1
-SLSQPVLTQ-PTSLSASPGASARLTCTLRSG---ISVGSYRIFWYQQKPGSPPRYLLWY
KSD---SD--KHQGSGVPSRFSGSKDASANAGILL------IS-GLQSEDEADYYCTT--
-----
>V201RF-AHZZ01089508.1-iglv |(16094, 16403)|2.98859608|(1.000,0.990,0.999)|-1
-SWAQSVLTQ-PPSASGAPGQRVTISCSGSSS---NIG-SNNVYWYQQFPGTAPKLLIYY
S---------NQRPSGVPDRFSGSK--SGTSASLA------IT-GLRSEDEADYYCAAWD
DSLSS
>V202RF-AHZZ01090491.1-ighv |(1149, 1458)|2.96764165191|(1.000,1.000,0.971)|-1
-VQCEVQLVE-SGGGLVKPGASLRLSCAASGFT-F---SSYGMHWVRQAPGKGLEWVSSI
SS--DSSY--IYYADSVKGRFTISRDNAKNSLSLQ------MN-SLRAEDTAVYYCAR--
-----
>V204RF-AHZZ01090492.1-ighv |(11745, 12060)|2.8122896514|(0.902,0.963,0.999)|-1
-VQCEVQLVE-SGGGLVQPGGSLRLSCAASGFT-F---SNHCMSWVRQAPGKGPEWVGLI
RNKANGGR--AEYAASVKGRFTISRDDSKSIASLQ------MN-SLKTGDTAVYYCTR--
-----
>V205RF-AHZZ01090494.1-ighv |(1969, 2281)|2.97151611711|(0.987,0.987,0.998)|-1
-VLSQVKLQE-SGPGLVKPSETLSLTCTVSSGS-IS--DSYYWSWIRQAPGKGLEWIGRI
YSS--GSS--TNYNPSLKNRVTISTDTSKNQFSLK------LS-SVTAADTAVYYCAR--
-----
>V207RF-AHZZ01093946.1-trav |(12355, 12645)|2.89173090506|(0.963,0.946,0.986)|-1
-VSSEDKVMQNPLSLVVHEGDTVTLNCSYEVV-----NF-QSLLWYKQEK-KAPTFLFTL
TSS---GI--EK----KSGRLSSILDKKDFFSILN------IT-ATQTRDSAVYLCAVE-
-----
>V208RF-AHZZ01093949.1-trav |(3892, 4191)|2.8006249066|(0.967,0.972,0.887)|-1
--VNGQQIMQIPQYQHVQEGEDFTTYCNSSTT------L-NNIQWYKQRPGGHPVFLIML
VKS---GE--VK----KQKRLTFQFGEAKKNSSLH------IT-ATQTTDVGSYFCAGHS
APQ--
>V214RF-AHZZ01096568.1-ighv |(3158, 3467)|2.99596800026|(1.000,0.998,0.998)|-1
-VLSQVQLQE-SGPGLVKPSETLSLTCAVSGGS-I---SSSYWNWIRQAPGKGLEWIGRI
YSS--GSS--TNYNPSLKNRVTISTDTSKNQFSLK------LS-SVTAADTAVYYCAR--
-----
>V215RF-AHZZ01096568.1-ighv |(16270, 16579)|2.9725031224|(1.000,0.975,1.000)|-1
-VQGEVQLVE-SGGGLAKPGGSLRLSCAASGFT-F---SSYGMSWVRQAPGKGLEWVSAI
SS--GGGS--TYYADSVKGRFTISRDNSKNTLSLQ------MN-SLRAEDTAVYYCAK--
-----
>V216RF-AHZZ01096572.1-ighv |(422, 737)|2.93374839429|(0.970,0.983,0.982)|-1
-VQCEVQLVE-SGRGLVQPGGSLRLSCAVSGFT-F---SDHYMSWVRQAPGKGPEWVGFM
RNKANGGR--TEYAASVKGRFTISRDDSKSTPSLQ------MS-SLNTEDTAVYYCAR--
-----
>V217RF-AHZZ01096574.1-ighv |(7206, 7516)|2.99280401921|(1.000,1.000,0.993)|-1
-VQCEVQLVE-SGGGLAQPGGSLRLSCVASGFT-F---SDHYMDWVRQAPGKGLEWVSSI
STG-SGST--TLYPDSVKGRFTISRDNAKNTVYLQ------MN-SLRAEDTAVYYCA---
-----
>V218RF-AHZZ01096575.1-ighv |(832, 1141)|2.85902635786|(0.968,0.984,0.918)|-1
-AHSEVQLVQ-SGAEVRKPGATVKISCKASGYT-F---TDYYLSWVRQAPGKGLEWMGCV
DPE--DGE--AIYAQKFQGRVTITADTSTDTAYME------LS-SLRSEDTAVYYCAR--
-----
>V222RF-AHZZ01103094.1-ighv |(666, 977)|2.97488623715|(1.000,1.000,0.977)|-1
-VQCEVQLVE-SGGGVVQPGGSLRLSCAASGFT-F---DDYAMGWVRQAPGKGLEWVSAI
SW--SGGS--TGYADSVKGRFTISRDNAKNSLYLQ------MN-RLRAEDTALYYCAKD-
-----
>V223RF-AHZZ01103097.1-ighv |(667, 978)|2.99193600205|(0.996,1.000,0.996)|-1
-VQCDVQLVE-SGGGLVKPGGSLRLSCVASGFT-F---SSYEMHWVRQAPGKGLEWVSGI
ST--SGGT--TYYADSVKGRFTISRDNAKNSLFLQ------MN-SLRAEDTAVYYCAKE-
-----
>V225RF-AHZZ01103258.1-ighv |(1265, 1574)|2.9726404731|(1.000,0.986,0.988)|-1
-VLSQVQLQE-SGPGLVKPSETLSLTCAVSGGS-I---SSNYWNWIRQAPGKGLEWIGSI
YSS--GSS--TNYNPSLKNRVTISTDTSKNQFSLK------LS-SVTAADTAVYYCAR--
-----
>V226RF-AHZZ01104243.1-igkv |(7682, 7981)|2.95819965751|(0.994,0.968,0.999)|-1
-TTGEIVLTQSPATLSLSPGERATLSCRASQSVS------SSLAWYQQKSGQAPRLLIYG
A---------SSRATGIPDRFSGSG--SGTDFTLT------IS-ILEPEDVAVYYCQQYY
NWN--
>V227RF-AHZZ01105198.1-iglv |(1704, 2007)|2.99596000066|(1.000,0.997,0.999)|-1
-SWAQSALTQ-PRSVSGSPGQSVTISCTGTSS---DIGGYNYVSWYQQHPGKAPKLMIYD
V---------SKRPSGVSDRFSGSK--SGNTASLT------IS-GLQAEDEADYYCSSYA
GS---
>V229RF-AHZZ01105199.1-iglv |(5057, 5367)|2.96269465218|(0.996,0.972,0.997)|-1
-SWAQAALTQ-PPSVSKSLGQSVTISCTGTSN---DIGGYNAVSWYQQHPGTAPRLLIYE
V---------SNRPSGVSDRFSGSK--SGNTASLT------IS-GLQAEDEADYYCGSYR
SGST-
>V230RF-AHZZ01105199.1-iglv |(17460, 17763)|2.98548011776|(1.000,0.989,0.997)|-1
-SAASYELTQ-PHSVSVSPGQTARITCG---G---DNIGSKYVQWYQQKPAQAPVLVIYA
D---------SERPSGIPERFSGSK--SGNTATLT------IS-GVEAGDEADYYCQVWD
SSSDH
>V231RF-AHZZ01105200.1-iglv |(22027, 22330)|2.78877966077|(0.993,0.882,0.965)|-1
-SAASYELTQ-PGSVSVSPRQTARITCG---G---DNIGSKSVHWYQQKPGQAPVLVIYN
D---------SERPSGIPERFSGSN--SGNTATLT------IS-GVEAGDEADYYCQVWD
SSSKY
>V234RF-AHZZ01105201.1-iglv |(63444, 63754)|2.9969280013|(0.997,1.000,1.000)|-1
-SWAQSALTQ-PPSVSGSPGQSVTISCTGTSS---DVGGYNYVSWYQQHPGTAPKLMIYD
V---------SNRPSGVSDRFSGSK--SGNTASLT------IS-GLQAEDEADYYCCSYT
TSST-
>V235RF-AHZZ01105201.1-iglv |(75648, 75951)|2.75184346526|(0.988,0.943,0.877)|-1
-SAASYELTQ-PPSVSVSPGQTARITCG---G---DNIGSEAVHWYQQKPPQAPVLVIYA
D---------SERPSGIPERFSGSN--SGNTATLT------IS-GVEAGDEADYYCQVWD
ISNDH
>V236RF-AHZZ01106331.1-igkv |(10056, 10356)|3.0|(1.000,1.000,1.000)|-1
-ARCDIQLTQSPSSLSASVGDRVTITCRASQGIS------SYLAWYQQKPGKAPKLLIYD
A---------SNLQSGVPSRFSGSG--SGTEFTLT------IS-SLQPEDFAVYYCQQRN
SYP--
>V237RF-AHZZ01106331.1-igkv |(16128, 16428)|2.99899600001|(1.000,0.999,1.000)|-1
-AKCDIQMTQSPSSLSASVGDRVTITCRASQGIS------SYLAWYQQKPGKAPKPLIYY
A---------SNLESGVPSRFSGSG--SGTEFTLT------IS-SLQPEDFATYYCQQYN
SAP--
>V238RF-AHZZ01106331.1-igkv |(33100, 33400)|2.96164165191|(0.998,0.998,0.969)|-1
-ARCDIQMTQSPSSLSASAGDRVTITCRASQGIS------TYLNWYQQKPGKAPTRLIYA
A---------SSLQSGVPSRFSGSG--SGTEFTLT------IS-SLQPEDFATYYCLQYN
SAP--
>V239RF-AHZZ01106331.1-igkv |(43583, 43883)|2.98267205249|(0.997,0.988,0.998)|-1
-TTGETVMTQSPATLSLSPGERATLSCRASQSVG------SSLAWYQQKPGQAPRLLVYY
A---------SSRATGIPDRFSGSG--SGTDFTLT------IS-SLEPEDVGVYYCQKYN
DWP--
>V240RF-AHZZ01107345.1-trbv |(266, 563)|2.6294945556|(0.891,0.834,0.921)|-1
--PIDSGITQTPKHLVIGMTNKKSLKCEQHMG-------HRAVYWYKQKAKKPPEIMFMY
NYE---TL--SINES-VPSRFSPECSK-SSLLHLH------LQ-ALQPEDSALYLCASSQ
-----
>V244RF-AHZZ01107395.1-igkv |(1617, 1915)|2.9055734465|(0.985,0.949,0.977)|-1
-TTGEIVMTQSPATLSLSPGERATLSCRASQSVN------SYLAWYQQKPGQAPRLLIYD
A---------SSRATGIPDRFSGSG--SGTDFTLT------IS-SLEPEDVAVYFCLQSS
NW---
>V245RF-AHZZ01107399.1-igkv |(425, 725)|2.994900005|(1.000,0.995,1.000)|-1
-AKCDIQMTQSPPSLSASVGDRVTITCQASQGIS------NWLAWYQQKPGEAPKLLIYA
A---------STLQSGVPSRFSGSG--SGTEFTLT------IS-SLQPEDFATYYCQQHN
SYP--
>V246RF-AHZZ01108758.1-ighv |(6447, 6754)|2.98782001102|(0.999,0.993,0.996)|-1
-VLSQVQLQE-SGPGVVKPSETLSLTCAVYGGS-V---SGSYWSWIRQAPGKGLEWIGEI
NGN--SGS--TSYNPSLKSRVTISTDTSKNQFSLK------LS-SVTAADTAVYYCA---
-----
>V247RF-AHZZ01110488.1-igkv |(1345, 1645)|3.0|(1.000,1.000,1.000)|-1
-ARCDIQMTQSPSSLSASVGDKVTITCHASQSIS------SWLAWYQQKPGKAPKLLIYK
A---------SSLQSGVPSRFSGSG--SGTDFTLT------IS-SLQPEDFATYYCQQYD
SNH--
>V248RF-AHZZ01111138.1-igkv |(1438, 1738)|3.0|(1.000,1.000,1.000)|-1
-ARCDIQMTQSPSSLSASVGDKVTITCHASQGIS------SWLSWYQQKPGKAPKLLIYK
A---------SSLQSGVPSRFSGSG--SGTDFTLT------IS-SLQPEDFATYYCQQYS
SSP--
>V249RF-AHZZ01111138.1-igkv |(3529, 3815)|2.72005121372|(0.887,0.907,0.938)|-1
-----IVMTQSPATLSLSPGERATLSCRASQSVS------SRLAWYQQKPGEAPRLLIYD
A---------SSRATGIPARFSGSG--SGTDFTLT------IS-SLEPEDVAVYFCQQES
NW---
>V250RF-AHZZ01111138.1-igkv |(14203, 14503)|2.99696400065|(1.000,1.000,0.997)|-1
-ARCDIQMTQSPPSLSASVGDRVTITCQASQSIS------NYLAWYQQKPGKAPKLLIYA
A---------STLQSGVPSRFSGSG--SGTEFTLT------IS-SLQPEDFATYYCQRHN
SYP--
>V251RF-AHZZ01111367.1-igkv |(1438, 1738)|3.0|(1.000,1.000,1.000)|-1
-ARCDIQMTQSPSSLSASVGDKVTITCHASQGIS------SWLSWYQQKPGKAPKLLIYK
A---------SSLQSGVPSRFSGSG--SGTDFTLT------IS-SLQPEDFATYYCQQYS
SSP--
>V252RF-AHZZ01111367.1-igkv |(3529, 3815)|2.72005121372|(0.887,0.907,0.938)|-1
-----IVMTQSPATLSLSPGERATLSCRASQSVS------SRLAWYQQKPGEAPRLLIYD
A---------SSRATGIPARFSGSG--SGTDFTLT------IS-SLEPEDVAVYFCQQES
NW---
>V253RF-AHZZ01111367.1-igkv |(14330, 14630)|2.99385601037|(1.000,1.000,0.994)|-1
-ARCDIQMTQSPPSLSASVGDRVTITCQASQGIS------NYLAWYQQKPGKAPKLLIYA
A---------STLQSGVASRFSGSG--SGTEFTLT------IS-SLQPEDFATYYCQQHN
SYP--
>V254RF-AHZZ01112481.1-ighv |(613, 919)|2.98896800026|(0.995,0.997,0.997)|-1
-VLSQVQLQE-SGPGVVKPSETLSLTCAVSGGS-I---SSSYWSWIRQPPGKGLEWIGYI
YG---GGS--TNYNPSLKSRVTMSADTSKNQLSLK------LS-SVTAADTAVYYCAR--
-----
>V255RF-AHZZ01125719.1-ighv |(24239, 24554)|2.99899200002|(0.999,1.000,1.000)|-1
-VQCEVQLVE-SGGGLVQPGGSLRVSCAASGFT-F---SNHYMQWVRQAPGKGLEWVGFI
RNKANGGT--AEYAASVKGRFTISRDDSKSIASLQ------MN-SLKTEDTAVYYCAR--
-----
>V256RF-AHZZ01125719.1-ighv |(41713, 42022)|2.98561205453|(0.991,0.995,1.000)|-1
-VQCEVQLAE-SGGGLVQPGGSLRLSCAASGFT-F---SSYEMHWVRQAPGKGLESVSVI
SG--DSSY--THYADSVKGRFTISRDNAKNSLSLQ------MN-SLRAEDTAVYYCAR--
-----
>V259RF-AHZZ01185532.1-igkv |(806, 1093)|2.9540773318|(0.995,0.986,0.975)|-1
-----TVVTQSPATLSLSPGERATISCRTSQSVG------SRLAWYQQKPGQAPRLLIYG
A---------SNRATGIPDRFSGSG--SGTDFTLT------IS-SLKPEDAAVYYCQQDN
DWK--
>V260RF-AHZZ01189918.1-igkv |(12178, 12478)|3.0|(1.000,1.000,1.000)|-1
-ARCDIQMTQSPSSRSASVGDTVTITCQASQGIS------DYLAWYQQKPGKAPKLLIYA
A---------SNLESGVPSRFSGSG--SGTDFTLT------IS-SLQPEDFATYYCQQYD
SDP--
>V261RF-AHZZ01189922.1-igkv |(4528, 4816)|2.97767205249|(0.996,0.987,0.995)|-1
-----IVMTQSPATLSLSLGETATISCRTSQSVG------SKLAWYQQKPGQAPRLLIYG
A---------SSRATGIPDRFSGSG--SGTDFTLT------IS-SLEPEDFAVYYCQETS
NLS--
>V262RF-AHZZ01189923.1-igkv |(14019, 14319)|2.93295832138|(0.979,0.959,0.998)|-1
-ARCDIQMTLSPSSLSASVGDRVTITCRASQDIS------SYLNWYQQKPGKAPKLLIYY
A---------TSLESGVPSRFSGSG--SGTDFTLT------IS-SLQPEDFATYYCQQFK
SYP--
>V264RF-AHZZ01198550.1-iglv |(8130, 8433)|2.99385601037|(1.000,0.994,1.000)|-1
-SWAQAALTQ-PHSVSGSPGQSVTISCTGTSS---DIGGYDRVSWYQQHPGKAPKLMIYE
V---------SKRPSGVSDRFSGSK--SGNTASLT------IS-GLQAEDEADYYCSSYA
GS---
>V265RF-AHZZ01198550.1-iglv |(32463, 32773)|2.781828921|(0.915,0.909,0.970)|-1
-SWAQSALIQ-SPSVSGSLGQSVTISCTGTSS---DIGRYNYVSWYRQQPGTTTKLMMYN
V---------NTRPSGVSDRFSGSK--SGNTASLT------IS-GLQAEDEADYYCSSYE
ASDT-
>V266RF-AHZZ01198551.1-iglv |(10418, 10728)|2.99298400013|(0.997,0.999,0.997)|-1
-SWAQSAPTQ-PPSVSGSPGQSVTISCTGTSS---DIGYYNAVSWYQQHPGTAPKLMIYR
V---------SNRPSGVSDRFSGSK--SGNTASLT------IS-GLQAEDEADYYCSSYA
GSDT-
>V267RF-AHZZ01198551.1-iglv |(33935, 34238)|2.89403878347|(0.995,0.940,0.973)|-1
-SAASYELTQ-PPSVSVSPGQMARITCS---G---DALPEKYADWYQQKPGQSPVLIIYE
D---------SKWPSGIPERFSGSS--SGTVATLT------IS-GAQVEDEADYYCYSTD
SSGNH
>V270RF-AHZZ01198553.1-iglv |(39757, 40060)|2.93470048487|(0.977,0.967,0.992)|-1
-SEASYELIQ-PPSVSVSPGQTARITCS---G---DALPDYYAYWYQQKSGQAPMLVIYK
D---------SERPSGIPERFSGSS--SGTTVTLT------IS-GVQAEDEADYYCQSAD
SSGNH
>V271RF-AHZZ01198553.1-iglv |(56860, 57163)|2.97775601537|(0.993,0.987,0.998)|-1
-SATSYELTQ-PPSVSAASGQTARITCG---G---DSIGSKNVQWYQQKPAQAPVLVIYA
D---------SKRPSGIPERFSGSN--SGNTATLT------IS-GVEAGDEADYYCQVWD
SSSKH
>V272RF-AHZZ01198553.1-iglv |(68992, 69302)|2.99099200002|(0.997,0.998,0.996)|-1
-SWAQAALTQ-PPSVSGSPGQSVTISCTGTSS---DIGGYNYVSWYQQHPGKAPKLMIYE
V---------SKRPSGVSDRFSGSK--SGNTASLT------IS-GLQAEDEADYYCGSYA
SSST-
>V0RF-JABR01013263.1-trbv |(179, 479)|2.87479932468|(0.986,0.967,0.934)|1
--HMGAGVSQSPRYKVTKKGQDVVLSCDPISG-------HEALYWYQQALGQGPKFLTYF
NYE---AQ--PDKSGLPNDRFSAERPK-GSVSTLT------IQ-RTEQRDSAVYLCASSL
-----
>V3RF-JABR01016432.1-iglv |(31781, 32090)|2.98097252412|(0.999,0.983,1.000)|1
-SWAQSVLTQ-PPSASGPPGQSVTISCSGSSS---NIG-SNYVYWYQQLSGKAPKLLIYD
N---------NKRPSGVPDRFSGSK--SGTSASLA------IS-GLQTEDEADYYCAAWD
DSLSG
>V5RF-JABR01043229.1-iglv |(142541, 142835)|2.90728822908|(0.964,0.967,0.977)|1
------VVTQ-EPLLSVSSGGTVAITCGLSSG---PVSTSNYPSWYQQTPGQAPRTLIYS
T---------NTRPSGVPDRFSGSI--LGNKAALT------IT-GAEADDESDYYCVLYM
GSGI-
>V8RF-JABR01052882.1-trgv |(88181, 88494)|2.93294695549|(0.999,0.991,0.952)|1
-SQKSSNLEGRTKSVTRPTGSSAEITCDFSGD-----SN-FYIHWYLHQEGKAPQRLLYY
DVS---NSRDVLESGLSLGKYYTHTR-TRWSWILI------LR-NLIENDSGVYYCATWD
-----
>V9RF-JABR01059011.1-ighv |(294, 609)|3.0|(1.000,1.000,1.000)|1
-VQCEVQLVE-SGGGLVQPGGSLRLSCAASGFT-F---SNYHMSWVRQAPGKGLEWVGFI
RNKASGGT--AEYAASVKGRFTISRDDSKSITYLQ------MN-SLKTEDTAVYYCAR--
-----
>V10RF-JABR01059011.1-ighv |(15565, 15872)|2.91002032645|(0.968,0.961,0.982)|1
-VQCEVQSVE-SGGGLVQPGGSLRLSCAASGFT-F---SSYWMSWVRQAPGKGPEWVSDI
S----GST--IYYADSVKGRFTVSRDDAKNSLSLQ------MD-SLRAEDTAVYYCARE-
-----
>V14RF-JABR01066987.1-ighv |(11840, 12146)|2.994900005|(1.000,1.000,0.995)|1
-VQCEVQLTE-SGGGLVQPDGSLRLSCAASGFT-F---SSYAMQWVHQAPGKGLEWVSAI
GP--G-GD--TYYADAVKGRFTISRDNTKNSLYLQ------MN-SLRAEDTAVYYCAR--
-----
>V17RF-JABR01070187.1-ighv |(7644, 7959)|2.82828447594|(0.941,1.000,0.906)|1
-VQCEVQLVE-SGGGLVQPGGSLRLSCAASGFT-F---SDYYMQWVRQAPGKGLQWVGLI
RNKANGGT--TDYSVSVKGRCTISRDDSKSITSLQ------MN-SLKTEDTAVYYCAR--
-----
>V18RF-JABR01070187.1-ighv |(14433, 14739)|2.95885291224|(0.996,0.998,0.968)|1
-VQCEMQLVE-SGGGLVQPGGSLRLSCAASGFT-F---SSYDMHWVRQAPGKGLEWVSAI
SI---GGG--TYYPDSVKGRFTISRDNAKNSLYLQ------MN-SLRAEDMAVYYCAR--
-----
>V20RF-JABR01074704.1-ighv |(2136, 2448)|2.99385601037|(1.000,1.000,0.994)|1
-VLSQVQLQE-SGPGLVKPSETLSLTCAVSGGS-IS--SYNYWSWIRQPPGKGLEWIGHI
YGN--SAS--TNYNPSLKSRVTISKDTSKNQFSLK------LS-SVTAADTAVYYCAR--
-----
>V22RF-JABR01076259.1-igkv |(8845, 9160)|2.93013070699|(0.987,0.953,0.995)|1
-SSGDIVMTQTPLSLPITVGETASISCRSSQSLLSS-NGYNYLSWYLQKPGQSLQLLIYY
G---------SNRASGVPDRFSGSG--SGTDFTLK------IS-RVEAEDIGVYYCMQTL
QTP--
>V24RF-JABR01076260.1-igkv |(17028, 17326)|2.72824613563|(0.995,0.833,1.000)|1
-SKGEIVLTQSPAFRSVTPKEKVTITCRASQSIG------SSLHWYQQKPDQSPKLLIKY
A---------SQSISGVPSRFSGSG--SGTDFTLT------IN-SLEAEDAATYYCQQSS
SF---
>V27RF-JABR01076261.1-igkv |(78882, 79179)|2.93443797113|(0.998,0.949,0.997)|1
--RCDIQMTQSPSSLSASVGDRVTITCRASQSFS------SSLAWYQQKLGKAPKLLIYG
A---------SSLQSGIPSRFSGSK--SGTDFTLT------IS-SLQPEDVAAYYCQQYY
SYP--
>V29RF-JABR01076261.1-igkv |(111081, 111379)|2.98974003277|(0.999,1.000,0.991)|1
-ARCDIQMTQSPSSLSASVGDRVTITCRASQGIS------SYLNWYQQKPGKAPKLLIYA
A---------SSLASGVPSRFSGSG--SGTEFTLT------IS-SLQPEDFAAYYCQQYN
SA---
>V31RF-JABR01076261.1-igkv |(164504, 164804)|2.9958720041|(0.996,1.000,1.000)|1
-ARCDIQMSQSPSSLSASVGDRVTITCQASQGIS------NALAWYQQKPGKAPKLLIYD
A---------SSLDSGVPSRFSGSG--SGTEFTLT------IS-SLQPEDFATYYCQQYN
SDP--
>V32RF-JABR01076263.1-igkv |(15350, 15650)|2.98742416586|(1.000,1.000,0.988)|1
-ARCDIQMTQSPSSLSASVGDRVTITCQASQGIS------SYLSWYQQKPGKAPKLLIYK
A---------SSLASGVPSRFSGSG--SGTEFTLT------IS-SLQPEDFAAYYCQQHN
SLP--
>V34RF-JABR01076263.1-igkv |(35502, 35802)|2.99899600001|(1.000,1.000,0.999)|1
-ARCDIQMTQSPSSLSASVGDRVTITCQASQGIS------SWLAWYQQKPGKAPKLLIYK
A---------SSLQSGVPSRFSGSG--SGTEFTLT------IS-SLQPEDFATYYCQQHN
SNP--
>V35RF-JABR01076263.1-igkv |(51711, 52011)|2.92674172101|(0.998,0.971,0.965)|1
-TTGEIVMTQSPATLSLSPGERATLSCRASQSVS------SRLVWYQQKHGQAPTLLIYG
A---------SSRATGIPARFSGSG--SGTDFTLT------IS-SLEPEDVGVYYCQQDY
SWP--
>V36RF-JABR01076263.1-igkv |(105623, 105923)|3.0|(1.000,1.000,1.000)|1
-ARCDIQMTQSPSSLSASVGDTVTITCQASQGIS------SYLAWYQQKPGKAPKLLIYA
A---------STLQSGVPSRFSGSG--SGTDFTLT------IS-SLQPEDFATYYCQQYN
SNP--
>V37RF-JABR01076263.1-igkv |(125399, 125698)|2.95174839429|(0.976,0.989,0.988)|1
-TTGEIVMTQSPATLSLSPGERATLSCRASQSVG------SYLAWYQQKPGQAPRLLIYG
A---------SSRATGIPDRFSGSG--SGTEFTLT------IS-SLEPEDFAVYFCQHYN
NWN--
>V39RF-JABR01076265.1-igkv |(8185, 8485)|2.80454932993|(0.998,1.000,0.870)|1
-TTGEIVMTQSPATLSLSPGERATLSCRASQSVS------SYLAWYQQKPGQAPRLLIYG
A---------SSRATGIPARFSGSG--SGTDFTLT------IS-SLEPEDVAVYYCQQGS
NLP--
>V40RF-JABR01076266.1-igkv |(4594, 4894)|3.0|(1.000,1.000,1.000)|1
-ARCDIQMTQSPSSLSASVGDRVTITCQASQGIS------NYLAWYQQKPGKAPKLLIYK
A---------STLQSGVPSRFSGSG--SGTDFTLT------IS-SLQPEDFATYYCQQGN
SYP--
>V41RF-JABR01076266.1-igkv |(22548, 22848)|2.99798400013|(1.000,1.000,0.998)|1
-ARCDIQMTQSPSSLSASVGDRVTITCQASQGIS------SYLAWYQQKPGKAPKLLIYD
A---------STLQSGVPSRFSGSG--SGTDFTLT------IS-SLQPEDFAAYYCQQGN
SNP--
>V43RF-JABR01088351.1-igkv |(10561, 10879)|2.92644883371|(0.997,0.952,0.986)|1
-TSGDIVMTQTPLSLPVTPGEPASISCRSSQSLLDSDDGYTYLDWYLQKPGQSPQLLIYE
V---------SNRASGVSDRFSGSG--SGTDFTLK------IS-RVEAEDVGVYYCMQSI
EYP--
>V44RF-JABR01088351.1-igkv |(62711, 63011)|2.99799600001|(0.999,1.000,0.999)|1
-ARCDIQMTQSPSSLSASVGDRVTITCRASQSIN------KELSWYQQKPGKAPTLLIYA
A---------SSLQTGVSSRFSGSG--SGTDFTLT------IS-SLQPEDVATYYCLQDY
TTP--
>V47RF-JABR01088351.1-igkv |(113703, 114003)|2.94725569424|(0.998,0.974,0.979)|1
-ARCDIQMTQSPSSLSASVGDRVTITCRASQGIS------NDLAWYQQKLGETPKLLIYD
A---------SSLQSGIPSRFSGSG--SGADFTLT------IS-SLQPEDFATYYCQHYY
SAP--
>V48RF-JABR01088351.1-igkv |(136166, 136466)|2.997|(0.999,0.999,0.999)|1
-ARCDIQMTQSPSSLSASVGDRVTISCQASQNIY------SNLGWYQQKPGKAPKLLIYA
A---------STLQSGVPSRFSGSG--SGTDFTLT------IS-SLQPEDVATYYCQHGY
STP--
>V49RF-JABR01088351.1-igkv |(159354, 159654)|3.0|(1.000,1.000,1.000)|1
-ARCDIQMTQSPSSLSASVGDRITITCQASQGIS------NDLAWYQQKPGESPKLLIYE
A---------SSLQSGIPSRFSGSG--SGTDFTLT------IS-SLQPEDFATYYCQHYY
STP--
>V50RF-JABR01088351.1-igkv |(170244, 170542)|2.98237212748|(1.000,0.989,0.994)|1
-ARCDIQMTQSPSSLSASVGDRVTISCQASESIS------DYLNWYQQKPGKAPKLLIYA
A---------STLQSVVPSRFSGSG--SGTDFTLT------IS-SLQPEDFATYYCQHGY
GT---
>V51RF-JABR01089346.1-ighv |(860, 1169)|2.93990483717|(0.995,0.999,0.953)|1
-AQSQVQLVQ-SGAEVKKPGASVKVSCKASGYN-F---RSYAISWVRQAPGQGLEWMGVI
IPI--RSR--TSYAQKFQGRVTITADTSTSTAYME------LS-SLRSEDMAVYYCAR--
-----
>V54RF-JABR01091180.1-ighv |(60296, 60605)|2.98196800026|(0.994,0.996,0.992)|1
-VQCEVQLVE-SGGGLVQPGGSLRLSCAASGFT-F---SSYWMSWVRQAPEKGLEWVSYI
NS--DGSS--TSYADSMKGRFTISRDNAKNSLYLQ------MN-SLRAEDRAVYYCVR--
-----
>V55RF-JABR01091180.1-ighv |(68033, 68348)|2.99074003277|(1.000,0.992,0.999)|1
-VQCEVQLVE-SGGGLVQPGGSLRISCAASGFT-F---SSSAMHWVRQASGKGLEWVGRI
RSKSKNYA--TDYAASVKGRFTISRDDSKNTAYLQ------MN-SLKTEDTAVYYCTT--
-----
>V56RF-JABR01091180.1-ighv |(78923, 79238)|2.98553608204|(1.000,0.996,0.990)|1
-VQCEVQLVE-SGGGLVQPEGSLRLSCAASGFT-F---SSYYMHWVRQAPGKGLEWVGLI
KNKANSYT--TEYAASVKGRFTISRDDSKNTLYLQ------MS-SLKTEDTAVYYCAR--
-----
>V64RF-JABR01092448.1-trbv |(79737, 80037)|2.91597825001|(0.992,0.970,0.960)|1
--SFHAKVTQTPGYLVKGKGQKTKMDCTPEKG-------HTFVYWYQQNQNKEFTFLISF
QSE---QV--LQETELHKKRFSSQCPK-NPPCSLE------IL-SSEPGDTALYLCASSQ
-----
>V65RF-JABR01092448.1-trbv |(88946, 89244)|2.89772588623|(0.989,0.980,0.939)|1
--SMDADVTQTPRNMIAKTGKRIMLECSQTKG-------HDQMYWYRQDPGLGLRLIYYS
FDV---KD--INKGE-ISDGYSVSRQE-QAQFSLS------LE-SATPNQTALYFCATSD
-----
>V66RF-JABR01092448.1-trbv |(97426, 97723)|2.98993600205|(0.998,0.998,0.994)|1
--LMEADIYQNPRHRVIGTGKKITLECSQTMG-------HDKMYWYQQDPGMELHLIHYS
YGV---NS--TERGD-FSSESTVSRIR-IEHFPLT------LE-SASPSHTSQYLCASSE
-----
>V68RF-JABR01092448.1-trbv |(137251, 137558)|2.85636962134|(0.988,0.903,0.994)|1
--LVDVKVTQSSRHLIKRMGEKVFLECVQDMD-------HERMFWYRQDPGLGLQLIYFS
YDV---KV--NEKGD-IPEGYSVSREK-KERFSLI------LG-SASTNQTSMYLCASSL
STA--
>V72RF-JABR01095741.1-trbv |(149740, 150037)|2.6950318509|(0.949,0.868,0.910)|1
--PTDAGVTQTPKHLVMGMTNKKSLKCEQHMG-------HRAMYWYKQKAKKPPEIMFMY
NYE---QL--SINES-VPSRFSPECSK-SSLLNLH------LQ-ALQPEDSALYLCASSQ
-----
>V73RF-JABR01095742.1-trbv |(5770, 6070)|2.75575248181|(0.954,0.929,0.891)|1
--HTEPEVTQTPSHRVTQMGQEVILRCVPISN-------HLYFYWYRQILGQKVEFLVYF
YND---EI--SEKSEIFDDRFSVGRPD-GSNFTLK------IK-STKLEDSAMYFCASSE
-----
>V76RF-JABR01189674.1-iglv |(736, 1045)|2.99089600501|(0.995,0.996,1.000)|1
-SWAQSVLTQ-PPSASGAPGQSVTISCSGSSS---NIR-GNGVHWYQQLSGTAPKILIYN
N---------NQRPSGVPDRFSGSK--SGTSASLA------IT-GLRSEDEADYYCEAWD
DSLSA
>V77RF-JABR01196792.1-trbv |(5405, 5708)|2.92774002125|(0.977,0.970,0.981)|1
-SVFSALVSQKPSRDVCQRGTSVTIQCQVDSQ-------VTMMFWYRQQPGQSLTLIATA
NQG--SEA--TYEGGFVIDKFPISRPN-LTFSTLT------VS-NTSPEDSSIYLCSVE-
-----
>V78RF-JABR01004697.1-ighv |(11840, 12149)|2.99067605248|(1.000,0.991,1.000)|-1
-VQGEVQLVE-SGGGLVQPGGSLRLSCAASGFT-F---GDYAMSWVRQAPGKGLEWVSYI
SSA--SST--IYYADSVKGRFTISRDNAKNTLSLQ------MN-NLRAEDTAVYYCAK--
-----
>V82RF-JABR01004698.1-ighv |(16088, 16403)|3.0|(1.000,1.000,1.000)|-1
-VQCEVQLVE-SGGGLVQPGGSLRLSCAASGFT-F---SSSAMHWVRQASGKGLEWVGRI
RSKSNNYA--TDYAASVKGRFTISRDDSKNTLYLQ------MN-SLKTEDTAVYYCTT--
-----
>V83RF-JABR01011024.1-ighv |(77, 386)|2.97019216959|(0.991,0.980,1.000)|-1
-VQCEVQLVE-SGGGLAKPAGSLRLSCAASGFT-F---SSYGMHWVRQAPGKGLEWVSYI
NS--GGGS--TRYADSVKGRFTISRDNAKNTLYLQ------MD-SLRAEDTAVYYCAR--
-----
>V85RF-JABR01035059.1-ighv |(16381, 16696)|2.99696400065|(1.000,1.000,0.997)|-1
-VQCEVQLVE-SGGGLVQPGGSLRLSCAASGFT-F---SNYWMGWVRQAPGKGLEWVGRI
KKTTDGGT--AEYAASVKGRFTISRDDSKNTLYLQ------MN-SLKTEDTAVYYCAR--
-----
>V86RF-JABR01035059.1-ighv |(36195, 36504)|2.82869332738|(0.987,0.886,0.996)|-1
-VQGEVQLVE-SGGGLAKPAGSLRLSCAASGFT-F---SSYWMNWVRQAPGKGLEWVSAI
NS--GGGS--TYYADSVKGRFTISRDNSKNMLYLQ------MN-NLRAEDTAVYYCAR--
-----
>V87RF-JABR01035060.1-ighv |(7723, 8038)|2.98171202074|(0.994,0.988,1.000)|-1
-VKCEAQLME-SGGGLVQPGGSLRLSCAASGFT-F---SDHYMQWVRQAPGKGLEWVGLI
RNKADGET--TDYAASVKGRVTISRDDSKSITYLQ------MS-SLKTEDTAVYYCAR--
-----
>V88RF-JABR01035060.1-ighv |(11223, 11532)|2.9700882474|(1.000,0.973,1.000)|-1
-VLSQVQLQE-SGPGLVKPSETLSLTCAVSGGS-L---SGYYWGWIRQPPGKGLEWIGYI
SGS--SGS--TNYNPSLKSRVTISTDTSKNQFSLK------LS-SVTAADTAVYYCAR--
-----
>V93RF-JABR01039937.1-trav |(16162, 16450)|2.94170803341|(0.979,0.987,0.976)|-1
-LSGELKVGQNPLFLSTQEGRNYTVYCNYSTA-----S--DRLYWYRQNPGKSLESLFVL
LSN---GA--VK----QEGRLMASLDTKARLSTLY------IT-AALQDLSATYFCAV--
-----
>V95RF-JABR01049702.1-ighv |(5414, 5728)|2.96820155558|(0.996,0.999,0.975)|-1
-VQCEVQLVE-SGGGLVQPGGSLRLSCAASGFT-F---SDHYLSWVRQAPGKGLEWVSFM
RNNANGGR--TEYAASVKGRCTISRDDSKSITSLQ------MS-SLKTEDTAVYYCAR--
-----
>V96RF-JABR01055994.1-ighv |(3382, 3691)|2.96317355698|(0.994,0.998,0.973)|-1
-AQSQVQLVQ-SGAEVKKPGASVKLSCKASGYT-F---TSYNINWVRQAPGQGLEWMGWI
NPS--SGS--TGYAQNFQGRVTMTRDTSTSTAYME------LS-SLRSEDTAVYYCAR--
-----
>V98RF-JABR01061517.1-igkv |(25345, 25645)|2.98192000218|(0.992,0.994,0.996)|-1
-ARCDIQMTQSPSSLSASVGDRVTITCRSSQGIN------NYLSWCQQKPGKAPKPLIYY
A---------SSLETGVPSRFSGSG--SGTDFTLT------IS-SLQPEDIATYYCQQYD
NLP--
>V99RF-JABR01063291.1-ighv |(13950, 14265)|2.85687924749|(0.962,0.998,0.912)|-1
-VQCEVQLVE-SGGGLVQPGGSLRLSCAASGFT-F---SNHYMHWVHQAPGKGLEWVGFI
RNNANGAT--TEYAASVKGRFTISRDDSKSVASLQ------MN-SLKTEDTAVYYCAR--
-----
>V103RF-JABR01068488.1-ighv |(524, 833)|2.79258842965|(0.940,0.949,0.908)|-1
-AQSQVQLVQ-SGAEVKKPGASVKVSCKASGYN-F---RSSAISWVRQAPGQGLEWMGVI
IPI--LSR--TNYAQKFQGRVTITADTSTSTAYME------LS-SLRSEDTAVYYCTR--
-----
>V104RF-JABR01071855.1-iglv |(8003, 8306)|2.99696400065|(1.000,1.000,0.997)|-1
-SWAQSALTQ-PPSVSGSPGQSVTISCTGTSS---DVGGYNYVSWYQQHPGTAPKLMIYD
V---------SNRPSGVSDRFSGSK--SGNTASLT------IS-GLQAEDEADYYCCSYA
GS---
>V105RF-JABR01071855.1-iglv |(31384, 31694)|2.98028822908|(0.997,0.984,1.000)|-1
-SWAQSALTQ-PRSVSGSPGQSVTISCTGTSN---DVGSYNSVSWYQQHPGKAPKLVIYE
V---------SKRPSGVSDRFSGSK--SGNTASLT------IS-GLQAEDEADYYCSSYA
GSGT-
>V106RF-JABR01071855.1-iglv |(60946, 61249)|2.96581638724|(0.997,0.983,0.987)|-1
-SAASYELTQ-PPSVSVSPGQTARITCS---G---DTLPDNYAYWFQQKPGQSPVLIIYE
D---------SKRPSGIPERFSGSS--SGTVATLT------IS-GAQVEDEADYYCYSSD
SSGNH
>V107RF-JABR01071855.1-iglv |(71726, 72036)|2.94355571893|(1.000,0.954,0.998)|-1
-SWAQSALTQ-PPSVSGSPGQSVTISCTGTSS---DIGGYNYVSWYQQHPGTALKLMIYG
V---------SNRPSGVSDRFSGSK--SGNTASLT------IS-GLQAEDEADYYCSSYS
SSYY-
>V111RF-JABR01071856.1-iglv |(45472, 45775)|2.99280401921|(1.000,1.000,0.993)|-1
-SWAQSALTQ-PRSVSGSPGQSVTISCTGTSN---DVGSYNSVSWYQQHPGKAPKLVIYE
V---------SKRPSGVSDRFSGSK--SGNTASLT------IS-GLQAEDEADYYCCSYT
TS---
>V113RF-JABR01071856.1-iglv |(64968, 65271)|2.87060823243|(0.997,0.924,0.973)|-1
-SVVSSELTQ-DPAVSVALGQTVKITCQ---G---DSLSSYYASWYQQKPGQVPVLVIYG
N---------SNRPSGIPDRFSGSY--SGNTASLT------IT-GAQVEDEADYYCGSWD
SSGNY
>V114RF-JABR01071856.1-iglv |(85218, 85521)|2.76415824799|(0.997,0.850,1.000)|-1
-SAASYELTQ-PPSESVSPGQTARITCG---G---DNIGSKAVHWYQQKPAQVPVLVIYS
D---------SNRPSGIPERFSGSN--SGNTATLT------IS-GVEAGDEADYYCQVWD
SSSDH
>V115RF-JABR01071856.1-iglv |(104914, 105224)|2.9763601679|(0.995,0.983,0.999)|-1
-SWAQSALTQ-PRSVSGSPGQSVTISCTGTSS---DIGGYNLVSWYQQHPGTAPKLVIYD
V---------SKRPSGVSDRFSGSK--SGNTASLT------IS-GLQAEDEADYYCCSYA
GSDT-
>V116RF-JABR01071856.1-iglv |(114426, 114723)|2.75073242179|(0.919,0.959,0.884)|-1
-SVASYELTQ-PPSVSVSPGQTARITCS---G---DVLKENYADWYQQKPGQAPVLVIHE
D---------SKRPSGIPEQFSGST--SGDTNTLT------IS-SSLSEDEADYYCFSGN
ENN--
>V117RF-JABR01071856.1-iglv |(122751, 123054)|2.98674003277|(0.998,0.990,0.999)|-1
-SAASYDVTQ-PQSVSVSPGQTARITCG---G---DNIGSKAVHWYQQKPAQAPVLVIYD
D---------SERPSGIPERFSGSN--SGNTATLT------IS-GVEAGDEADYYCQVWD
SSSDH
>V118RF-JABR01071859.1-iglv |(21796, 22105)|2.98079201242|(0.993,0.989,0.999)|-1
-SWAQSVLTQ-PPSASEAARKSVTISCSGSSS---NIG-SNRVSWYQQLPGTAPKLLIYN
N---------NQRPSGVPDRFSGSK--SGTSASLA------IS-GLQTEDEADYYCAAWD
DSLSS
>V121RF-JABR01071860.1-iglv |(31436, 31745)|2.95506581776|(1.000,0.971,0.988)|-1
-SWAQSVLTQ-PPSVSGVPGQKVTISCTGSSS---NIG-GYYVQWYQQLPGTAPKLLIYQ
D---------NKRPSGVSDRFSGSK--SGTSASLA------IT-GLQSEDEADYYCGTWD
SSLNG
>V122RF-JABR01071860.1-iglv |(36557, 36866)|2.99798400013|(1.000,0.998,1.000)|-1
-SWAQSVLTQ-PPSVSGAPGQKVTISCTGSSS---NIG-GYYVSWYQQLPGTAPKLLIYQ
D---------NKRPSGISDRFSGSK--SGTSASLA------IT-GLQTEDEADYYCQSYD
SSLSG
>V124RF-JABR01071861.1-iglv |(18449, 18758)|2.98367205249|(0.998,0.989,0.997)|-1
-SWAQSVLTQ-PPSASGIPGQSVTISCSGSSS---NIG-SNNVYWYQQFPGTAPKLLIYN
N---------NQRPSGVPDRFSGSK--SGTSASLA------IS-GLRSEDEADYYCEAWD
DNLSG
>V127RF-JABR01071862.1-iglv |(65675, 65984)|2.99089600501|(0.995,0.996,1.000)|-1
-SWAQSVLTQ-PPSASGAPGQSVTISCSGSSS---NIR-GNGVHWYQQLSGTAPKILIYN
N---------NQRPSGVPDRFSGSK--SGTSASLA------IT-GLRSEDEADYYCEAWD
DSLSA
>V128RF-JABR01071862.1-iglv |(83033, 83345)|2.97306587284|(0.999,0.977,0.999)|-1
-SWAQSVLTQ-PPSVSGTPGQRVTISCTGSSS---NIGVGYYVSWYQQLPGTAPKLLIYQ
D---------NKRPSGISDRFSGSK--SGTSASLA------IT-GLQSEDEADYYCQSYD
NSLSG
>V129RF-JABR01071862.1-iglv |(111105, 111415)|2.94938667423|(0.996,0.962,0.996)|-1
-SLSQPVLTQ-PTSLSASPGASARLTCTLSSG---INVGSYRIFWYQQKPGSAPRYLLSY
YTD---SD--KHQGSGVPSRFSGSKDASANAGILL------IS-GLQSEDEADYYCMI--
-----
>V130RF-JABR01071862.1-iglv |(116435, 116744)|2.92138299634|(0.980,0.950,0.996)|-1
-SWAQSVLTQ-PRSASGTPGQRVTISCSGSSS---NTG-SNYVSWYQQLPGTAPKPLIYY
D---------DKQASGVSDRFSGSK--SGTSASLA------IS-GLQSEDEADYYCATWD
NSLSG
>V132RF-JABR01077601.1-iglv |(19390, 19700)|2.95136527997|(0.992,0.972,0.989)|-1
-SWANFMLTQ-PHSVSGSVGQKVVISCTRSSG---SIG-SYYVQWYQQRPGSAPTTVIYD
D---------NERPSGVPDRFSGSIDSSSNSASLT------IS-GLETEDEADYYCQSYD
SSS--
>V134RF-JABR01077601.1-iglv |(59589, 59901)|2.99798400013|(1.000,0.998,1.000)|-1
-SWAEVVFTQ-PHSVSGSPGQTVTISCTRSSG---SIG-SYYVQWYQQRPGSAPTTVIYN
D---------NKRPSGVPDRFSGSIDSSSNSASLT------IS-GLKSEDEADYYCQSAA
DSYS-
>V135RF-JABR01077603.1-iglv |(14585, 14894)|2.96887652911|(0.997,0.981,0.992)|-1
-VDSETEVTQ-EPSLSVSPGGTVTLTCGLSSG---SVSTSNYPSWYQQTPGQAPRMIIYN
T---------NTRPSGVPDRFSGSI--LGNKAALT------IT-GAEADDESDYYCVLYM
GSGI-
>V136RF-JABR01077916.1-ighv |(11011, 11320)|2.99498000014|(0.998,1.000,0.997)|-1
-VQCEVQLVE-SGGDLVKPGGSLRLSCVASGFT-F---SSYAMHWVRQAPGKGLEWVSVI
ST--SGGS--TYYADSVKGRFTISRDNAKNSLSLQ------MN-SLRAEDTAVYYCAR--
-----
>V137RF-JABR01077916.1-ighv |(16007, 16319)|2.9460773318|(0.979,0.970,0.999)|-1
-VLSQVQLQE-SGPGLVKPLETLSLTCAVSGYS-IS-S-GYYWSWIRQPPGKGLEWIGRI
YGS--SGS--TDYNPSLKSRVTISKDTSKNQFSLK------LS-SVTAEDTAVYYCAR--
-----
>V138RF-JABR01077917.1-ighv |(3891, 4200)|2.96480001921|(0.991,0.984,0.990)|-1
-VLSQVQLQQ-WGEGLVKPSETLSLTCAVSGGS-I---SSYWWSWIRQPPGKGLEWIGEI
NGN--SGS--TNYNPSLKSRVTISTDTSKNQFSLK------LS-SVTAADTAVYYCAR--
-----
>V139RF-JABR01077917.1-ighv |(15725, 16034)|2.83446662233|(0.983,0.964,0.910)|-1
-VQCEVQLVE-SGGGLVQPGGFLRLSCAGSGFA-F---SSYGMDWVRQAPGKGLEWVAVI
SY--DGSQ--KYYADSVKDRFTISRDNSKNMLYLQ------MN-NLRAEDTAVYYCAK--
-----
>V140RF-JABR01078980.1-ighv |(7987, 8296)|2.97268883957|(0.998,0.996,0.980)|-1
-AQSQEQLVQ-SGAEVKKPGASVKVSCKASGFT-F---DSYAISWVRQAPGQGLEWMGWI
VPD--YDI--TNYAQKFQGRVTITADTSTSTAYME------LS-SLRSEDTAVYYCAR--
-----
>V141RF-JABR01086102.1-ighv |(13684, 13993)|2.78640143598|(0.988,0.957,0.886)|-1
-AQSQEQLVQ-SGAEVKKPGASVKVSCKASGYT-F---SSYAISWVRQAPGQGLEWMGVI
NPI--VGI--TNYAQKFQGRVTITADTSTSTAYME------LS-SLRSEDTAVYYCAR--
-----
>V142RF-JABR01088213.1-trbv |(2386, 2682)|2.89786276126|(0.980,0.957,0.964)|-1
--SVDAGVTQSPTHLIKMRGQQVTLRCSPISG-------HNSVSWYQQALGQGPQLIVQY
YRE---QE--NGRG-NFPERFSGHQFP-NYSSELN------VS-ALLLVDSALYLCASSL
-----
>V144RF-JABR01088213.1-trbv |(27616, 27913)|2.92642949373|(0.986,0.996,0.950)|-1
--HMDAGITQSPRHKITETGTPVTLRCHQTEN-------HRYMYWYRQDLGYGLRLIHYS
YGV---ED--TDKVE-VSDGYSVSRSK-TEDFLLT------LE-SATHSQTSVYLCASSE
-----
>V147RF-JABR01088214.1-trbv |(9866, 10166)|2.96759608|(0.993,0.983,0.992)|-1
--HTCAGVSQSPRYKVTKRGQDVTLRCDPISG-------HEYLYWYQQVPGQGREFLTYF
QND---AQ--LDKSGLPSDRFSAERPE-GSISILK------IQ-RTEQGDSAVYLCASSL
-----
>V151RF-JABR01088214.1-trbv |(45860, 46151)|2.92322221922|(1.000,0.999,0.939)|-1
----NAGVTQTPKFQVLKTGQSMTVQCTQDMN-------HNYMYWYRQDPGMGLRLIYYS
VTA---GI--TTKGE-VSNGYNVSRIN-TEDFLLR------LE-SAAPSQTSVYFCASSY
-----
>V152RF-JABR01088215.1-trbv |(4946, 5242)|2.88750687711|(0.979,0.964,0.949)|-1
--PVQAGVTQSPTYLIKRRGQQVTLRCSPISG-------HTSVSWYQQALGQGPQFIFEY
SNE---LR--TSEG-NFPDRFSGRQFR-NYHSEMN------VS-ALELGDSALYLCASSF
-----
>V153RF-JABR01088215.1-trbv |(7599, 7895)|2.70946366626|(0.982,0.946,0.852)|-1
--SVDSGVTQTPKHLITAIGQQVTLRCSPRSG-------DLSVYWYQQSLGQGLQFLIQY
YNG---KE--RAKG-NILERFSAQQFP-DLHSELN------LS-SLELGDSALYFCASSL
-----
>V157RF-JABR01088215.1-trbv |(64243, 64539)|2.99088400513|(0.998,1.000,0.993)|-1
--PVNAGVTQTPKFQVLKTGQSMILQCAQDMN-------HDYMYWYRQDPGMGLRLIHYS
VGA---GI--TDKGE-VSNGYSVSRSN-TEDFPLR------LE-SAAPSQTSVYFCASSY
-----
>V162RF-JABR01088215.1-trbv |(106852, 107152)|2.84723918747|(0.941,0.923,0.997)|-1
--HTGAGVSQSPRYKVSKRGQEVALRCDPISG-------HAALYWYQQALGQGPELLTYF
NYE---AQ--QDKSGLLSDRFSAERPE-GSVSTLT------IE-RTEQGDSAVYLCASSL
-----
>V164RF-JABR01088216.1-trbv |(3479, 3776)|2.9636404731|(0.997,0.985,0.983)|-1
--PANAGVTQSPKFQILKTGQSMTLQCAQDMN-------HNSMYWYRQDPGMGLRLIHYS
VAE---NT--TDTGE-VPDGYSVSRLK-KKDFLLR------LE-SAAPSQTSVYFCASSE
-----
>V168RF-JABR01088216.1-trbv |(32988, 33285)|2.99396800026|(0.998,1.000,0.996)|-1
--PVNAGVTQTPKFQILKTGQSMTLQCAQDMN-------HNYMYWYRQDPGMGLRLIHYS
VGK---GS--TDTGE-VPDGYSVSRSN-LQNFMLR------LE-SAAPSQTSVYFCASSE
-----
>V171RF-JABR01098590.1-trav |(5160, 5460)|2.93418588966|(0.996,0.973,0.970)|-1
-FSMAQTVTQSQPEMSVQEAETVTLSCTYDTS-----DSDYYLFWYKQPPSRQMILIIRQ
EAY---KQ--QN---ATENRFSVNFQKAAKSFSLK------IS-DSQLGDAAGYFCAYR-
-----
>V172RF-JABR01098592.1-trdv |(18652, 18953)|2.76834005623|(0.978,0.977,0.864)|-1
-SSMAQTVTQSQPEMSVQEAETVTLNCTYDTS-----ESNYYLFWYKQPPSRQMILIIRQ
EAY---KQ--QN---AKENRFSVNFQKAAKSFSLK------IS-DSQLGDAAMYFCAFM-
-----
>V184RF-JABR01098598.1-trav |(19033, 19320)|2.97170402421|(0.990,0.985,0.997)|-1
--VNSQQGEEDPQALSIQEGENATMNCSYKTS------I-DNLQWYRQDSGRSLVRLILI
RSN---ER--EK----SSGRLRVTLDTSKKSSSLL------IT-ASRAADTASYFCATD-
-----
>V185RF-JABR01098598.1-trav |(25184, 25475)|2.9410935653|(0.986,0.992,0.965)|-1
-RTNGDSVTQTEGPVTLPERAALTLNCTYQTS-----YS-AFMFWYVQYLNKEPELLLKS
S-E---NQ---E---TDSRGFQASHVKSDSSFHLE------KL-SVQLSDSAVYYCVLR-
-----
>V186RF-JABR01098598.1-trav |(28683, 28986)|2.77047195752|(0.949,0.907,0.924)|-1
-SSMAQKVTQAQTEISVVEKEDVNLDCVYETR-----DSTYYLFWYKQPPSGELIFLIRQ
NSF---NE--QN---EINGRYSSNFQKSTSSFNLT------IT-ASQVVDSAVYFCALNE
-----
>V187RF-JABR01098599.1-trav |(7776, 8069)|2.97864005313|(0.995,0.986,0.998)|-1
VWSQQKEVEQNPGPLSVPEGATASLNCTYSNS-----AF-QYFMWYKQYSRKGPQLLIYT
YSS---GD--K-----EDGRFTAQVDKSSKYISLF------IR-DSQPSDSATYFCAMS-
-----
>V189RF-JABR01098600.1-trav |(14202, 14490)|2.92580593785|(0.960,0.976,0.996)|-1
VWS-QQKVEQNSGSLSVPEGAIASLNCTYSDR-----GS-QSFLWYRQYSGQSPELLIST
YSS---GD--K-----EDGRFTAQLNKASQYVSLL------IR-DSQLSDSATYLCVV--
-----
>V190RF-JABR01098600.1-trav |(20988, 21285)|2.63391777149|(0.990,0.830,0.927)|-1
-GTRAQSVTQLDSQVSVSEGVPVLLRCNYSSS-----FS-PSLFWYVQYPNQGLQLLLKY
ISG---TA--LV---KGINGFEAEFKKSETTFHLT------KA-SAHVSDAAEYFCAVS-
-----
>V191RF-JABR01098600.1-trav |(26541, 26838)|2.97536527997|(1.000,0.997,0.980)|-1
-TARAQSVTQPDIHITVSEGASLELRCNYSYG-----AT-PSLFWYVQSPGQGLQLLLKY
FSG---DT--LV---QGIKGFEAEFKRSQYSFNLR------KP-SVHWSDAAEYFCAAG-
-----
>V192RF-JABR01098600.1-trav |(40729, 41022)|2.91269832585|(0.995,0.959,0.967)|-1
-VSRGESVGLHLPTVSVQEGDNSVINCTYSDS-----VS-DYFLWYKQESGKGPQFIIDI
RSN---MA--KR----QGQRLTVLLNKTVKHLSLQ------IA-ATEPGDSAVYFCAEN-
-----
>V193RF-JABR01098600.1-trav |(52617, 52918)|2.75126597494|(0.948,0.861,0.975)|-1
-SGIAQKITQTQPAMFMQEKEAVTLDCTYDTS-----DQNYGLFWYKQPSSGEMIFLIHQ
ESY---DK--QN---ATEGRYSLNFQKARKSINLI------IS-ASQVGDSAMYFCAMR-
-----
>V195RF-JABR01098601.1-trav |(15930, 16220)|2.98286400565|(0.997,0.992,0.994)|-1
--VNGENVEQHPSILSVQEGDSSVIKCTYSDS-----AS-NYFPWYKQELGKGPQLIIDI
RSN---VH--EK----KDQRITVLLNKTAKHFSLH------IT-ETQPGDSAVYFCAAS-
-----
>V196RF-JABR01098603.1-trav |(9193, 9499)|2.98061205453|(0.998,0.994,0.989)|-1
VWSQQKEVEQDPGPFSVPEGATVTFNCTYSNS-----AS-QSFFWYRQDSRKEPKLLMSV
YSS---G---N-----EDGRFTAQLNRASQYISLL------IR-DSQLSDSATYLCAVRT
QCSP-
>V198RF-JABR01098604.1-trav |(11404, 11694)|2.99593600205|(1.000,1.000,0.996)|-1
-MSRGEDVEQSL-FLSVREGDISVINCTYTDS-----SS-TYLYWYKQEPGAGLQLLTYI
LSN---TD--LK----QDQRLTVLLNKKDKHLSLR------IA-DTQTGDSAIYFCAES-
-----
>V200RF-JABR01098604.1-trav |(37115, 37402)|2.87236078502|(0.956,0.945,0.973)|-1
-ANGENQVEQSPRFLGPQQGDVAFMSCMYSVS-----RF-NNLQWYRQNTGTGPKHLFSM
YSA---GY--EK----QKGRLNATLLKNG--SSLY------IT-AMQPEDSATYFCAVD-
-----
>V201RF-JABR01098604.1-trav |(64438, 64732)|2.98080001|(0.997,0.992,0.992)|-1
-EINGDSVVQTEGQVLLSEGDSLIVNCSYEST-----QY-PSLFWYVQYPGEGPQLLLKA
MMA---ND---K---ESNKGFEATYHKETTSFHLK------KD-SVQESDSAVYFCALS-
-----
>V202RF-JABR01098604.1-trav |(77658, 77951)|2.94571942965|(0.970,0.995,0.984)|-1
-GSGKNQVEQSPQSLIILEGKNCTLQCNYTVS-----PF-NNLRWYKQDTGKGPISLTIM
TFS---EN--TK----LNGRYTATLDADTKQSSLH------IT-ATQLSDSASYICVVS-
-----
>V206RF-JABR01184607.1-trbv |(64, 364)|2.9471290053|(0.985,0.997,0.967)|-1
--HTGAGVSQSPRNKVTEKGKDVALRCDPISG-------HTVLYWYRQNLGQGLEFLIYF
RGT---GA--VDDSGLRSDQFSATRPE-GSDSTLK------IQ-CTEQRDSAMYFCASSL
-----
>V207RF-JABR01190886.1-ighv |(459, 765)|2.92242463332|(0.974,0.989,0.961)|-1
--CAEVQLVQ-SGAEVKRPGESLKISCKTSGYS-F---TSYWISWVRQMPGKGLEWMGMI
YLG--DSD--TRYSPSFQGQVTISADKSISTTYLQ------WS-SLKASDTATYYCAK--
-----
>V0RF-JZKE01005121.1-trbv |(3942, 4254)|2.86465640993|(0.943,0.951,0.975)|1
--LVETKVTQTPRHLVKRTGEKVLLKCSQDMD-------HERMFWYRQDPGLGLRLIYFS
YDV---DN--DEKGD-VSEGYSASRKK-KEYFPLV------LE-SASTNQTSVYLCASRY
PQRCT
>V4RF-JZKE01218258.1-igkv |(171021, 171321)|2.98632422844|(1.000,1.000,0.987)|1
-ARCDIQMTQSPSSLAASLGDTVTITCQASQGIS------NYLSWYQQKPGQSPKILIYG
A---------SNLETGVPSRFSGSG--SGTDFTLT------IS-SLQPEDFATYYCLQSY
NYP--
>V9RF-JZKE01244686.1-ighv |(3631, 3937)|2.98880001|(0.993,0.998,0.998)|1
-VQCEVQLVE-SGGGLVQPGGSLTLSCVASGFT-F---SSYAMCWVRQAPGKGLEWVSAI
GS--G-GG--TYYADAVKGQFTISRDNSKNTLSLQ------MK-SLQAEDTAMYYCAR--
-----
>V10RF-JZKE01244690.1-ighv |(27, 336)|2.80681224378|(0.968,0.959,0.899)|1
-VQCEVQLVE-SGGGLVQPGGSLRLSCAASGFT-F---DDYAMHWVRQAPGKGLDWVSVI
NW--NGDY--INYADAVKGRFTISRDNSKNSLYLQ------MN-SLRAEDTAVYYCAR--
-----
>V11RF-JZKE01244709.1-ighv |(12, 321)|2.9858400105|(0.994,1.000,0.992)|1
-VQCEVQLVE-SGGGLVQPGGSLRLSCAVSGFT-V---SNYYMSWVRQAPGKGLEWVSYI
YS--DDGD--TNYADAVKGRFTTSTDNGKNMLYLQ------MN-SLRTEDTAVYYCAR--
-----
>V12RF-JZKE01244710.1-ighv |(1079, 1388)|3.0|(1.000,1.000,1.000)|1
-AQCEVQLVE-SGGGLVQPGGSLTLSCAASGFT-F---SDYYMSWVRQAPGKGLEWVSRI
SNT--GGS--TWYADAVKGRFTISRDNSKNTLSLQ------MN-SLRAEDTAVYYCAR--
-----
>V13RF-JZKE01244715.1-ighv |(308, 614)|2.99293600205|(0.999,0.995,0.999)|1
-VRCEVQLVE-SGGGLVQPGGSLTLSCAASGFT-F---SSYAMHWVRQAPGKGLEWVSRI
NS--G-GS--TSYADAVKGRFTISRDNSKNMLSLQ------MN-SLRSEDTAVYYCTR--
-----
>V19RF-JZKE01249933.1-iglv |(3726, 4036)|2.77453758905|(0.988,0.935,0.896)|1
-SLSQPVLTQ-PPSLSASPGASARLTCTLSSG---FSVGSYAIYWYQQKPGSPPRYLLSY
YSD---SD--KHQGSGVPRRFSGSKDASANVGILH------IS-GLQPEDEADYYCMV--
-----
>V21RF-JZKE01249944.1-iglv |(1831, 2141)|2.98521630725|(1.000,0.986,1.000)|1
-SLANVVLTQ-PSSVSGSPGQKVTISCTRSSG---NIG-DNYVHWYQQRPGSAPTTVIYA
D---------DKRPSGVPDRFSGSIDSSSNSASLT------IS-GLQSEDEADYYCQSYG
SSA--
>V26RF-JZKE01249957.1-iglv |(3969, 4267)|2.94606016446|(0.998,0.973,0.979)|1
--SVASQLTQ-VPAVSVALGQTARITCQ---G---DSLSSYYPNWYQQKPGQAPVLVIYG
N---------SNRPSGIPERFSSSD--SGTTATLT------IS-GAQAGDEADYYCGSYA
GSDT-
>V30RF-JZKE01249959.1-iglv |(447, 745)|2.91611408413|(0.973,0.954,0.992)|1
-SVASYELTQ-PPSVSVSPGQTARITCG---G---NNIGNKYAYWHQQKAGQAPVLIIYS
D---------SNRPSGIPERFSGSN--SGNTATLT------IS-GTQAGDEADYYCQVWD
GSN--
>V31RF-JZKE01255160.1-ighv |(7108, 7423)|2.99392000218|(0.996,1.000,0.998)|1
-VQCEVQLVE-SGGGLVQPGGSLTLSCAASGFS-F---SNYWMHWVRQAPGKGLEWVSSI
GN--D-GS--TSYADAVKGRFTISRDNDKNTLSLR------MN-SLRAEDTAVYYCARET
V----
>V32RF-JZKE01296733.1-igkv |(5866, 6179)|2.92028822908|(0.979,0.976,0.966)|1
-SSGDIVMTQTPLSLSVTPGESASISCTASQSILHT-DGNTYLNWLLQKPGQPPKRLIYK
I---------SNRDSGVSDRFSGSG--SGTDFTLE------IS-RVEAEDVGVYYCMQAS
YY---
>V33RF-JZKE01097728.1-igkv |(2698, 3010)|2.91042597125|(0.989,0.940,0.991)|-1
-ACGDIVMTQSLRSLAVSPGERVTIDCKSSQSLL--SNNKNYLAWHQQKPGQAPKLLIYW
A---------STRASGVPDRFSGSG--SGTDFTLT------IS-SVQAEDVAVYYCQQYH
STP--
>V35RF-JZKE01143868.1-trav |(15192, 15493)|2.8790773318|(0.970,0.950,0.961)|-1
-SSVAQTVTQSQPEMSVQEAGTVTLDCTYATS-----DSNYYLFWYKQPPSRQMILIIRQ
EAY---KQ--QN---ATENRFSVNFQKAAKSFSLE------IS-DSQLEDAAMYFCAFM-
-----
>V37RF-JZKE01143869.1-trav |(6274, 6564)|2.90623355494|(0.962,0.983,0.963)|-1
-VSSEDKVIQSPSSLAVHEGDSATLTCNYEVS-----YF-QSLQWYKQEK-NAPTFLFTL
TSS---GI--EK----KSGRLSSILDNKELLSTLN------IT-ATQTRDSAIYFCAVE-
-----
>V45RF-JZKE01143873.1-trdv |(6157, 6456)|2.81228190752|(0.925,0.969,0.926)|-1
-STVAQKVTQYQATTSMTEGQAVTLNCQYETSS----T-TYFICWYKQLPSKEMIFLLRQ
GST---SQ---N---AKDGRYSVNFRKEAKSINLT------IS-ALRLEDSAKYFCALWD
-----
>V47RF-JZKE01143874.1-trdv |(2471, 2770)|2.7393256383|(0.930,0.951,0.873)|-1
-STVAQKVTQAQTATTRTVGQAVTLNCQYEASW----S-SYYIYWYKQLPSNEMIFLLRQ
YSG---DQ---N---AKNGRYSINFQKEAKSIDLT------IS-ALRLEDSAKYFCALWD
-----
>V49RF-JZKE01143890.1-trav |(1103, 1400)|2.97167205249|(0.988,0.997,0.987)|-1
-RSNGDSVTQTEGTVTLPEGAPVILNCTYETT-----YSVSYLFWYVQYLNQSPQLLLKS
STE---NQ---R---GENRGFQANLVKSDKSFHLE------KS-SLRMSDSAVYYCALS-
-----
>V51RF-JZKE01143891.1-trav |(8677, 8980)|2.92950687711|(0.963,0.978,0.993)|-1
-PSMAQKVTQAQPEISVVEKESVTLDCVYETR-----DPTYYLFWYKQPPSGEMIFLIRQ
DSF---NE--KN---ETKDRYFLNLQKSTSSISLT------IT-ASQLMDSAVYFCALRE
-----
>V52RF-JZKE01143893.1-trav |(6613, 6900)|2.87529565252|(0.951,0.977,0.950)|-1
--VNSQQGEENPQALSIQEGENATINCSYKSS------I-SNLQWYRQDSGRGLTLLILI
RAN---KR--EE----HHGRLTVTLNTSIKSSSLI------IT-ASCAADSATYFCATD-
-----
>V53RF-JZKE01143895.1-trav |(12286, 12579)|2.6372974615|(0.936,0.795,0.998)|-1
-VSGGENVGLHPPTLNVQEGDTSVINCTYSNS-----AS-NYFPWYKQELGKGPQFIIDI
RSN---MD--NK----QEQRFTVLLNKTAKHLSLH------IA-GTQAGDSAVYFCAES-
-----
>V54RF-JZKE01143895.1-trav |(15624, 15933)|2.96508440501|(0.993,0.978,0.995)|-1
-AGIAQKVTQSQPAMSVQEKEAVTLDCTYDTSTS---VTSYTLFWYKQPSSGEMILLIRQ
DSY---NQ--QN---ATEGRYSLNFQKASKSIKLV------IS-ASQVGDSAIYFCALSE
-----
>V55RF-JZKE01143895.1-trav |(22481, 22772)|2.96576801985|(0.990,0.993,0.983)|-1
VRSQQKEVEQTPESLSVSEGATASLNCTYSNT-----AS-QYFTWYRQYSGKGPELLVSI
YSN---GD--K-----EEERFTVHLNMASRYVSLL------IR-DSQPSDSATYLCAV--
-----
>V57RF-JZKE01143896.1-trav |(1244, 1537)|2.9032417319|(0.956,0.966,0.985)|-1
-VRGGENMGLHPPNLSVQEGDTSVINCTYSNS-----NS-DYFCWYKQEPGKGPQFIMDI
RSN---KD--KK----QEGRFTILLNKMAKHLSLH------IA-GTQAGDSAAYLCAES-
-----
>V58RF-JZKE01143896.1-trav |(8327, 8630)|2.95010320239|(0.996,0.971,0.986)|-1
-SGIAQKVTQVQPAMLVQEKEAVTLDCTYDTS-----DSRYTLFWYKQPSSGEMLLLIRQ
DSY---NQ--QN---ATEGRYSLNFQKANKSIKLV------IS-ASQVGDSAIYFCALME
-----
>V59RF-JZKE01143896.1-trav |(15626, 15938)|2.90973070067|(0.977,0.990,0.947)|-1
VRSQQKEVEQTPESLSVSEGATASLNCTYSNT-----AS-QYFAWYRQYSGKGPELPVSI
YST---GD--KE----EEGRFTVQLNKGSRYVSLL------IR-DSQPSDSATYLCAVST
QCSP-
>V60RF-JZKE01143902.1-trav |(453, 744)|2.97250008499|(0.996,0.986,0.991)|-1
VRSQQKEVEQTPESLSVSEGATASLNCTYSNT-----AS-QYFAWYRQYSGKGPELLVFI
YST---GD---K----EEGRFTVQLNKASRYVSLL------IR-DSQPSDSATYLCAV--
-----
>V61RF-JZKE01143903.1-trav |(641, 935)|2.95570083945|(0.980,0.998,0.979)|-1
-RTHGDSVTQMEGQVTLSEEAFLTINCTYTAT-----GY-PALFWYVQYPGEGPQLLLKA
TKA---ND---K---GINKGFEATYKRETTSFHLE------KA-SVHESDSAVYYCALS-
-----
>V62RF-JZKE01143910.1-trav |(6899, 7192)|2.80023317448|(0.933,0.897,0.987)|-1
-VSGKNQVEQGPQSLIIPEGENCTLQCNYTVS-----PF-NNLRWYKQETGRGPVSLIIM
NYS---KS--KE----SNGRYTATLDASAKQSSLH------IT-ASQLSDSASYICVAS-
-----
>V65RF-JZKE01143910.1-trav |(57835, 58138)|2.95677645736|(0.988,0.973,0.997)|-1
-AGVAQKVTQSQPAMLVQEKEAVTLDCTYDTS-----DSSYGLFWYKQPSSGEMLLLIRQ
DSY---NQ--QN---ATEGRYSLNFQKARKSIHLV------IS-ALQLGDSAIYFCALSE
-----
>V68RF-JZKE01143915.1-trav |(12659, 12952)|2.87947106565|(0.941,0.970,0.977)|-1
-VSRGENVEQRPSTLHVQEGDTSVINCTYSDS-----AS-SYFPWYKQELGKGPQLFIDI
RSN---LD--KK----QDQRITLLLNRMTKHLSLH------IA-ATQPGDSAVYFCVAS-
-----
>V73RF-JZKE01143916.1-trav |(38882, 39172)|2.884671556|(0.989,0.936,0.972)|-1
-ISRGEKVEQSP-FLSVQEGDSSVINCTYTES-----TS-TYFYWYKQGPGEGPQLLMTI
LSS---MD--KK----QEQRLSVLLNKREKHLSLH------IS-DTQPGDSAVYFCAVS-
-----
>V74RF-JZKE01143916.1-trav |(40477, 40765)|2.88564084149|(0.955,0.959,0.973)|-1
--VNSQKIEQNPRALNIHEGETAAVTCNYTSY-----SP-AFLQWYRQDPERGLVFLLLI
REN---EG--EK----QEGRLKVTFDTTHKQSSFY------IT-DSQPADSATYLCAA--
-----
>V75RF-JZKE01143916.1-trav |(59581, 59872)|2.95679201242|(0.985,0.991,0.981)|-1
--SHGDSVTQTDGQMLLTEGDSLIVNCSYETR-----QY-PALFWYVQYPGEGLQLLLKA
AKA---ND---K---GINKGFEATYNRETTSFHLE------KA-SVHVSDSAVYYCALS-
-----
>V77RF-JZKE01196378.1-trbv |(847, 1154)|2.88522155506|(0.970,0.949,0.968)|-1
--HTDAGITQNPRFRVTETGKQVTLRCHQTDK-------YDYMYWYRQDLGRGLRLIHYS
YGV---QR--TDKGE-FSEGYNVSRSD-MEDFPLT------LE-SATPSQTSVYFCAISD
STA--
>V78RF-JZKE01235368.1-ighv |(1130, 1439)|2.99696400065|(1.000,0.997,1.000)|-1
-VQCQVQLVE-SGGGLVQPGGSLTLSCAASGFT-F---SSYWMYWVRQAPGKGLEWVSSI
NY--GGGS--TYYADGVKGRFTISRDNSKNTLSLQ------MN-SLRAEDTAVYYCAK--
-----
>V79RF-JZKE01238797.1-iglv |(185, 497)|2.98267205249|(0.997,0.998,0.988)|-1
-SWAQSALTQ-PPSVSGAPGQTVTISCTGSSS---NIGGGYYASWYQQLPGSAPKLLIYY
D---------SDRPSGIPARFSGSK--SGSSASLT------IT-GLQAEDEADYYCAAWD
TSLSG
>V80RF-JZKE01238797.1-iglv |(4422, 4732)|2.99280401921|(1.000,0.993,1.000)|-1
-SLANFVLTQ-PSSVSGSPGQKVTISCTRSSG---NIG-DNYVSWYQQRPGSAPTTVIYD
D---------NQRPSGVPDRFSGSIDSSSNSASLT------IS-GLQSEDEADYYCQSYD
SSA--
>V81RF-JZKE01238799.1-iglv |(2255, 2565)|2.99698000014|(1.000,0.998,0.999)|-1
-SLANFVLTQ-PSSVSGSPGQKVTISCTRSSG---NIG-SYYVHWYQQRPGSAPTTVIYN
D---------NQRPSGVPDRFSGSIDSSSNSASLT------IS-GLQSEDEADYYCQSYD
SSA--
>V82RF-JZKE01238800.1-iglv |(606, 916)|2.87184182274|(0.990,0.935,0.962)|-1
-SLSQPVLTQ-PPSLSASPGASARLTCTLSSG---FSVGSYAIYWYQQKPGSPPRYLLSY
YSD---SS--KHQGSGVPSRFSGSKDASANAGILH------IS-GLQPEDEADYYCMA--
-----
>V84RF-JZKE01255181.1-ighv |(445, 754)|3.0|(1.000,1.000,1.000)|-1
-VQCEVQLVE-SGGGLVQPGGSLTLSCAASGFT-F---SDYYMHWVRQAPGKGLEWVSYI
SSS--GGS--TYYADAVKGRFTISRDNSKNTLSLQ------MN-SLRAEDTAVYYCVR--
-----
>V85RF-JZKE01255182.1-ighv |(1026, 1335)|2.9969280013|(0.997,1.000,1.000)|-1
-VQCEVQLVE-SGGGLVQPGGSLTFSCAASGFT-F---SSYNMHWVRQAPGKGLEWVSYI
SN--TGGS--TYYAEAVKGRFTISRDNSKNTLSLQ------MN-SLRAEDTAVYYCAG--
-----
>V86RF-JZKE01278248.1-ighv |(4833, 5139)|2.99698000014|(0.998,0.999,1.000)|-1
-VQCEVQLVE-SGGGLIQPGGSLTLSCAASGFT-I---SSYYMDWVRQASGKGLEWVSAI
SS---GGS--TYYADAVKGRFTISRDNSKNTLSLQ------MN-SLRAEDTAVYYCAR--
-----
>V88RF-JZKE01278253.1-ighv |(3391, 3700)|2.91634954035|(0.979,1.000,0.944)|-1
-VQCEVQLVE-SGGGLVQPGGSLRLSCAASGFT-F---SDYYMHWVRQAPGKGLEWVSYI
YS--DGGD--TNHADAVKGRFTTSTDNGKNMLYLQ------MN-SLRAEDTAVYYCAR--
-----
>V89RF-JZKE01278255.1-ighv |(2535, 2844)|3.0|(1.000,1.000,1.000)|-1
-VQCEVQLVE-SGGGLVQPGGSLTLSCAASGFT-F---SSYWMYWVRQAPGKGLEWVSSI
NS--GGGS--TYYADAVKGRFTISRDNSKNTLSLQ------MN-SLRAEDTAVYYCAK--
-----
>V90RF-JZKE01278267.1-ighv |(5092, 5401)|2.99899200002|(0.999,1.000,1.000)|-1
-VQCEVQLVE-SGGGLVQPGGSLRLSCAASGFT-F---SSYGMNWARQAPGKGLEWVSTI
NY--DGSS--TSYADAVKGRFTISRDNSKNTIYLQ------MN-SLRAEDTAVYYCAK--
-----
>V91RF-JZKE01278268.1-ighv |(3308, 3617)|2.99899200002|(0.999,1.000,1.000)|-1
-VQCEVQLVE-SGGGLVQPGGSLTLSCVASGFT-F---SSYYMHWVRQAPGKGLEWVSYI
NTA--GGS--TSYADAVKGRFTISRDNSKNTLSLQ------MN-SLRAEDTAVYYCAR--
-----
>V92RF-JZKE01278271.1-ighv |(48, 354)|3.0|(1.000,1.000,1.000)|-1
-VQCEVQLVE-SGGGLAQPGGSLTLSCAASGFT-F---SNYGMHWVRQAPGKGLEWVSAI
S---SGGS--TYYADAVKGRFTISRDNSKNTLSLQ------MN-SLRTEDTAVYYCAK--
-----
>V93RF-JZKE01278271.1-ighv |(7402, 7711)|2.99593600205|(1.000,1.000,0.996)|-1
-VQCEVQLVE-SGGGLVQPGGSLTLSCAASGFT-F---SSYDMSWVRQAPGKGLEWVAVI
WA--DGSK--QYYADSVKGRFTISRDNGKNMLYLQ------MN-SLRAEDTAMYYCAS--
-----
>V94RF-JZKE01278273.1-ighv |(24, 333)|2.97236527997|(0.999,0.979,0.996)|-1
-VQCEVQLVE-SGGGLVQPGGSLTLSCAASGFT-F---SSYVMYWFRQAPGKGLEWVSRI
SS--SGGS--TSYADALKGRFTISRDNSKNTLSLQ------MN-SLRAEDTAVYYCAK--
-----
>V95RF-JZKE01278276.1-ighv |(456, 765)|2.99798400013|(1.000,1.000,0.998)|-1
-VQCEVQLVE-SGGGLVQPGGSLKLSCAASGFT-F---SSYGMNWVRQAPGKGLEWISHI
NY--DAGS--TYYADAVKGRFTISRDNSKNTLSLQ------MN-SLKAEDTAVYYCAK--
-----
>V96RF-JZKE01278277.1-ighv |(1432, 1741)|2.96936527997|(0.996,0.976,0.999)|-1
-VQCEVQLVE-SGGGLVQPGGSLTLSCAVSGFT-V---SSYGMNWVRQAPGKGLEWVSYI
YS--DGGS--TNYADAVKGRFTTSTDKSKNTLSLQ------MN-SLRAEDTAVYYCAR--
-----
>V97RF-JZKE01278602.1-ighv |(13, 322)|2.99799600001|(0.999,1.000,0.999)|-1
-VQCEVQLVE-SGGGLVQPGGSLTLSCAASGFT-F---SSYWMSWVRQAPGKGLEWVSTI
SH--TGGS--TYYADALKGRFTISRDNSKNTLSLQ------MN-SLRTEDTAVYYCAR--
-----
>V98RF-JZKE01278602.1-ighv |(4600, 4909)|2.96842016586|(0.994,0.982,0.993)|-1
-VQCEVQLVE-SGGGLVQPGGSLRLSCVASGFT-F---SSYVMYWFRQSPGKGLEWVSRI
SS--SGGS--TSYADALKGRITISRDNSKNTLSLQ------MN-SLRAEDTAVYYCAI--
-----
>V99RF-JZKE01278605.1-ighv |(401, 710)|2.99899200002|(0.999,1.000,1.000)|-1
-VQCEVQLVE-SGGGLVQPGGSLTLSCAASGFT-F---SDYYMSWVRQAPGKGLEWVSRI
SSD--GTS--TYYADAVKGRFTISRDNSKNTLSLQ------MN-SLQAEDTAVYYCAR--
-----
>V100RF-JZKE01278607.1-ighv |(3705, 4014)|2.99899200002|(0.999,1.000,1.000)|-1
-VQCEVQLVE-SGGGLVQPGGSLTLSCAASGFS-F---SSYWMHWVRQAPGKGLEWVSYI
NSA--GGS--TYYADAVKGRFTISRDNSKNTLSLQ------MN-SLRAEDTAVYYCAR--
-----
>V101RF-JZKE01278609.1-ighv |(657, 966)|2.99698000014|(0.998,0.999,1.000)|-1
-VQCEVQLVE-SGGGLIQPGGSLTLSCAASGFS-F---SSYRMNWVRQAPGKGLEWISYI
SS--GGGS--TYYADAVKGRFTISRDNSKNTLSLQ------MN-SLRAEDTAVYYCAR--
-----
>V102RF-JZKE01278610.1-ighv |(3774, 4083)|2.99799600001|(0.999,0.999,1.000)|-1
-VQCEVQLVE-SGGGLVQPGGSLTLSCAASGFS-F---SSYDMSWVRQAPGKGLEWVSYI
NY--GGGS--TSYADAVKGRFTISRDNSKNTLSLQ------MN-SLRADDTAVYYCAS--
-----
>V103RF-JZKE01278610.1-ighv |(12525, 12834)|2.97878801933|(0.996,0.989,0.994)|-1
-VHCEVQLVE-SGGGLVQPGGSLTLSCAASGFT-V---SSYCMSWVRQAPGKGLEWVSYI
YS--DGGS--RNYADAVKGRFTTSTDNGKNTLYLQ------MN-SLRAEDTALYYCAR--
-----
>V104RF-JZKE01278611.1-ighv |(583, 892)|2.97129965252|(1.000,1.000,0.974)|-1
-VQCEVQLVE-SGGGLVQPGGSLRLSCVASGFT-F---SDYYMSWVRQAPGKGLEWVLYI
YS--DDGD--TSYADAVKGRFTISTDNGKNMLYLQ------MN-SLRAEDTAVYYCAR--
-----
>V105RF-JZKE01278611.1-ighv |(6883, 7192)|3.0|(1.000,1.000,1.000)|-1
-VQCEVQLVE-SGGGLVQPGGSLKLSCAASGFT-F---SSYGMNWVRQTPGKGLEWISYI
NS--AGGS--TSYADAVKGRFTISRDNSKNTLSLQ------MN-SLRAEDTAVYYCAR--
-----
>V106RF-JZKE01278614.1-ighv |(2171, 2477)|2.99696400065|(1.000,0.997,1.000)|-1
-VQCEVQLVE-SGGGLVQPGGSLTLSCAVSGFT-V---SSYDMSWIRQASGKGLEWVSYI
SY--G-GS--TYYADAVKGRFTISRDNGKNTLSLQ------MN-SLRTEDTAVYYCAR--
-----
>V110RF-JZKE01294668.1-trbv |(161, 463)|2.93976429988|(0.993,0.984,0.966)|-1
--HTDAGITQNPRFRVTETGKQVTLRCHQTDK-------HDYMYWYRQDLGHGLRLIHYS
IGA---GN--TEKGQ-FSDGYSVSRSN-EQNFSLT------LE-SATPSQTSVYFCASSD
ST---
>V116RF-JZKE01294669.1-trbv |(21670, 21960)|2.81074205679|(0.943,0.914,0.958)|-1
----DAGVIQSPRHLIKGKQETTILKCYPLSG-------HDTVYWYQQAPGQGLQFLISY
YEK---MQ--REKG-NIPQRFSGQQFA-DYHSELN------LS-SLEPGDSALYLCASSL
-----
>V119RF-JZKE01294690.1-trbv |(9942, 10239)|2.80937406219|(0.919,0.969,0.932)|-1
--PLDTAVFQTPKYLVSQMGNNVSLKCKQTLG-------HNTMYWYKQDSEKLLKIMFAY
NNK---EL--ILNET-VSNRFSPASPD-KAHLNLH------IE-SPEPDDSAVYLCASSY
-----
>V120RF-JZKE01294692.1-trbv |(174, 471)|2.88185507227|(0.942,0.984,0.965)|-1
--PVDTGITQTPRHLVMGMTDKKSLKCEQNLG-------HDAMYWYKQSAKKPPELMFYY
NYQ---EL--RENLT-VSSRFSPECPD-SSHLYLH------LD-ALQPDDSAMYLCASSQ
-----
>V0RF-AGCE01061995.1-trbv |(4895, 5202)|2.92632580233|(0.979,1.000,0.952)|1
--PVTAGVTQTPKFQVLKSGQSMTLQCAQDMN-------HDGMYWYRQDPGMGLRLIHYS
VGE---GT--TAKGE-VPDGYNVSRSN-TKDFPLR------LE-AAAPSHTSVYFCASSD
STV--
>V1RF-AGCE01061995.1-trbv |(16809, 17122)|2.96845211916|(0.992,0.996,0.981)|1
--PLDSAVSQTPKYLVTQMGKKESLKCEQNLG-------HDTMYWYKQDSKKLLKIMFIY
NNK---EP--ILNET-VPNRFSPESPD-KAHLNLH------IE-SLELGDSAVYFCASSQ
DTALQ
>V4RF-AGCE01061995.1-trbv |(36451, 36748)|2.90760549808|(0.994,1.000,0.930)|1
--PVNAGVTQTPKFQVLKTGQSITLQCAQDMN-------HDRMYWYRQDPGMGLRLIHYS
VGE---GT--TAKGE-VPDGYKVSRSN-TKDFPLR------LE-AAVPSQTSMYFCASSD
-----
>V9RF-AGCE01061998.1-trbv |(1696, 1993)|2.90308808336|(0.991,0.934,0.991)|1
--HGDAEITQSPRHKGTETGRQVTLKCHQTWN-------HNYMYWYRQDLGHGLRLIHYS
YGV---QD--INKGE-VSDGYVASRSN-LEDFPLT------LE-SALSSQTSVYFCASSD
-----
>V11RF-AGCE01062000.1-trbv |(15550, 15847)|2.89167100508|(0.989,0.941,0.972)|1
--HGDAEITQSPRHKVTKTRRQVTLKCHQTWN-------HNYMYWYRQDLGHGLRLIHYS
VAA---DN--TEKGE-VSHGYVVSRSN-TEDFPLT------LE-SATHSQTSVYFCASSD
-----
>V13RF-AGCE01062002.1-trbv |(433, 734)|2.84110798542|(0.960,0.961,0.925)|1
----NAGVTQTPKFQVLKKGQSMTLQCAQDVN-------YDCMYWYRQDPGMGLRLIYYS
VDE---GI--TDKGE-VHHGYNVSRSN-REDFPLR------LE-AAALFQTSVYFCAISA
STV--
>V17RF-AGCE01062008.1-trbv |(590, 890)|2.87679048042|(0.976,0.970,0.937)|1
--HAGAGVSQDPRHKVTKTGQNVTFRCDPISG-------HNSLYWYRQTLGQSPEFLTYF
QNE---VQ--LDKSGLPSDRFFAERTK-GSFSTLK------IQ-RTEQGDSAMYLCASSL
-----
>V18RF-AGCE01062008.1-trbv |(6797, 7094)|2.81011271541|(0.961,0.892,0.977)|1
--SVAAGVIQYPRHLIKEKRKTAILKCYPIPG-------HDTVYWYQQGPGQGLQFLISY
YEK---TQ--RDKG-SIPDRFTAQQFS-DYHSELN------MS-SLELGDSALYLCASSL
-----
>V19RF-AGCE01062009.1-trbv |(1447, 1744)|2.93076891711|(0.989,0.984,0.961)|1
--HMDGRITQSPRHKVTETGTPVALRCHQTEN-------HRYMYWYRQDLGHGLRLIYYS
YGV---KD--ISKGE-VPDGYNVSRSN-TEDFPLT------LE-STTGSQTSVYFCASSD
-----
>V20RF-AGCE01062009.1-trbv |(16503, 16803)|2.86978128928|(0.979,0.951,0.947)|1
--HTDAGVIQSPQHKMTEMGQEVTLRCEPISG-------HTQLFWYRQTVMRGLELLTYF
NNE---NL--IDDSGMPKDRFSAQMPN-ASFSTLK------IQ-PSEPGDSAVYFCASSL
-----
>V21RF-AGCE01062009.1-trbv |(38765, 39065)|2.82228663903|(0.955,0.972,0.906)|1
--HTAAGVTQFPSHRVIEKGQAVTLRCDPISG-------HEYLYWYRRVMGKEIKFLIYF
LRD---SK--QDESGMPNHRFSAERTG-GTNSTLK------VQ-SAELEDSGIYFCASSL
-----
>V33RF-AGCE01134599.1-igkv |(6643, 6943)|2.79067779488|(0.998,0.863,1.000)|1
-ARCDIQMTQSPSSLSASVGDRVTITCRASRSIS------TELDWYQQKPGKAPVLLIYA
A---------SSLQTGVPSRFSGSG--SGTDFTLT------IS-SLQPEDVATYYCQQDY
SYP--
>V35RF-AGCE01134600.1-igkv |(15938, 16236)|2.91139047236|(0.981,0.951,0.983)|1
----DIVMTQTPLSLSVTPGKPASIVCRSSQSLFDSEDGNTYLNWYLQKPGQSPQLLIYD
A---------STHASGVPDRFSGSG--SGTDFTLK------IS-RVEAEDVGVYYCMQA-
-----
>V36RF-AGCE01134600.1-igkv |(26942, 27257)|2.82968861185|(0.997,0.887,0.993)|1
-SSGDIVMTQTPLSLPVTPGEPASISCRSSQSLLHS-DGYTYLDWYLQKPGQSPQLLIYT
V---------SNRASGVPDRFSGSG--SGTDFTLK------IS-RVEAEDVGVYYCMQAT
QAP--
>V37RF-AGCE01134600.1-igkv |(34924, 35224)|2.9898400105|(0.994,1.000,0.996)|1
-TRCDIQMTQSPSSLSASVGDKVTITCQASQGIN------SWLAWYQQKPGKAPRLLIYA
A---------SSLQTGIPSRFSGSG--SGTHYTLT------IS-SLQPDDFATYYCQQTY
STP--
>V38RF-AGCE01134600.1-igkv |(45692, 45992)|2.98753206285|(0.991,0.997,1.000)|1
-ARCDIQMTQSPTFLSASVGDRVTITCQASQSIG------SALAWYQQKPGKATRLLIYA
A---------SSLQSGVPSRFSGSG--SGTDFTLT------IS-SLQPDDFATYYCQQYS
SFP--
>V39RF-AGCE01134602.1-igkv |(4964, 5279)|2.92580524432|(0.987,0.972,0.969)|1
-SSGDIVMTQTPLSLSVTPGEPASISCRSSQSLLHS-NGNTYLHWFLQKPGQSPQRLIYR
V---------SNLASGIPDRFSGSG--SGTDFTLK------IS-RVEAEDIGVYYCVQSI
QTP--
>V41RF-AGCE01134603.1-igkv |(35325, 35640)|2.82582865271|(0.991,0.893,0.980)|1
-SSGDIVMTQTPLSLPVTPGEPASISCRSSQSLLYS-DGKNYLYWYLQKPGQSPQLLIYL
G---------SNRASGVPDRFSGSG--SGTDFTLK------IS-RVEAEDVGVYYCMQGI
ELP--
>V42RF-AGCE01134604.1-igkv |(11428, 11728)|2.95320464967|(1.000,0.997,0.962)|1
-TRCDTQMTQSPSSLSASVGDRVTITCRASQSIS------NWLAWYQQKPGQVPKLLIYK
A---------STLQSGVPSRFSGSG--SGTDFTLT------IS-SLQPEDVATYYCQKCN
SAP--
>V43RF-AGCE01134604.1-igkv |(23700, 24015)|2.94808521936|(0.998,0.970,0.984)|1
-SSGDIVMTQTPLSLPVTPGEPASISCRSSQSLLHS-NGNTYLSWYLQKPGQSPQLLIYK
V---------SNRASGVPDRFSGSG--SGTDFTLK------IS-RVEAEDVGVYYCMQDT
KTP--
>V47RF-AGCE01134610.1-igkv |(3122, 3422)|2.99196000066|(0.996,0.999,0.997)|1
-TRCDIQMTQSPSSLSASVGDKVTITCQASQGIS------NNLAWYQQKTGKAPRLLINE
A---------SSLESGVPSRFSGSG--SGTDFTLT------IS-SLQPEDSATYYCQQHN
SYP--
>V48RF-AGCE01134612.1-igkv |(802, 1102)|2.99899600001|(1.000,0.999,1.000)|1
-ARCDIQMTQSPSSLSASVGDKVTITCQASQGIN------NYLAWYQQKPGKAPRLLIYY
A---------SSLDSGVPSRFSGSG--SGADYTLT------IS-SLQPEDFATYYCQQYN
SYP--
>V49RF-AGCE01134613.1-igkv |(4841, 5141)|2.99899600001|(1.000,0.999,1.000)|1
-ARCDIQMTQSPSSLSASVGDKVTITCQASQGIN------NYLAWYQQKPGKAPRLLIYY
A---------SSLQSGVPSRFSGSG--SGADYTLT------IS-SLQPEDFATYYCQQYS
SYP--
>V50RF-AGCE01134614.1-igkv |(11222, 11522)|2.98270402421|(0.995,0.988,1.000)|1
-ARCDIQMTQSPSSLSASVGDKVTITCQASQGIS------KWLAWHQQKPGKAPKLLIYE
A---------SKLQSGVPSRFSGSG--SGTDFTLT------IS-SLQPEDFATYYCQQYN
SNP--
>V51RF-AGCE01134616.1-igkv |(2365, 2665)|2.97156408064|(0.995,0.992,0.985)|1
-STGQIVMTQSPATLSLSPKETATLSCRASQSVS------SYLAWYQQKPGQAPRLLIYG
A---------STRATGIPDRFSGSG--SGTEFTLT------IS-SLEPEDFAVYYCQQYN
NRP--
>V53RF-AGCE01134616.1-igkv |(27065, 27365)|2.99899200002|(0.999,1.000,1.000)|1
-ARCDIQMTQSPSSLSASVGDTVTITCQASQGIS------KWLAWYQQKPGKAPKLLIYD
A---------SKLQSGVPSRFSGSG--SGTDFTLT------IS-SLQPEDFATYYCQQHN
SNP--
>V54RF-AGCE01134617.1-igkv |(5600, 5900)|2.73511071856|(0.977,0.989,0.841)|1
-TSGQIVMTQSPATLSLSPKETATLSCRASQSVS------SYLAWYQQKPGQGPRLLIYG
A---------STRATGIPARFSGSG--SGTEFTLT------IS-SLEPEDFAVYYCKQYN
NWP--
>V57RF-AGCE01147749.1-ighv |(15994, 16303)|2.97048011776|(0.993,0.996,0.982)|1
-VHSQVQLVQ-SGAEVKKPGASMKVSCKASGYT-F---TDYYMNWVRQAPGKGLEWMGDI
DPE--NGE--TSYAQKFQGRVTMTADTSTSTAYME------LR-SLRSEDTAVYYCAR--
-----
>V58RF-AGCE01147750.1-ighv |(13331, 13640)|2.82169470108|(0.983,0.981,0.891)|1
-VQCEVQLVE-SGGGLVQSGWSLRLSCVASGST-F---SDYYMHWVCQAPGKGLEWIGQI
NP--NGRS--TYFTDFVKGRFTISRDNAKNSLYLQ------MN-NLKTEDTAVYYCAG--
-----
>V60RF-AGCE01147864.1-ighv |(20911, 21220)|3.0|(1.000,1.000,1.000)|1
-VQCEVQLVE-SGGGLVQPGGSLRLSCAASGFT-F---SSYWMSWVRQAPGKGLEWVSAI
NT--DGSS--TYYADAVKGRFTISRDNAKNSLYLQ------MN-SLRAADTAVYYCAR--
-----
>V66RF-AGCE01147874.1-ighv |(2400, 2706)|2.9768400105|(0.995,0.989,0.993)|1
-VQCEVQLVE-SGGGLAKPGGSLRLSCAASGFT-F---SSYAMSWVRQAPGKALEWVSAI
GT--G-GS--TYYADAVKGRFTISRDNAKNSLFLQ------MN-SLRAEDTAVYYCAR--
-----
>V68RF-AGCE01147944.1-ighv |(862, 1171)|2.99593600205|(1.000,0.996,1.000)|1
-VQCEVQLVE-SGGGLAKPGGSLRLSCAASGFT-F---SSYYMDWVRQAPGKALEWVSAI
STD--GSG--TSYADSVKGRFTISRDNAKNSLYLQ------MS-SLRAEDTAVYYCAT--
-----
>V71RF-AGCE01148057.1-ighv |(4263, 4572)|2.96160565256|(0.997,0.968,1.000)|1
-VQCEVQLVE-SGGGLAKPGGSLRLSCAASGFV-F---SSYHMHWVRQAPGKGLEWVSFI
SS--DGGS--TYYADSVKGRFTISRDNAKNSLYLQ------MS-SLRAEDTAVYYCAR--
-----
>V72RF-AGCE01148067.1-ighv |(2196, 2505)|2.96164947362|(1.000,0.999,0.967)|1
-VQSQVQLVQ-SGAEVKKPGASVKVSCKASGYT-F---TSYYMNWVRQAPGQGLEWMGWI
NPY--NGN--TGYAQKFQGRVTMTVDKSTSTAYME------LS-SLRSEDTAVYYCAK--
-----
>V78RF-AGCE01026520.1-trdv |(67373, 67673)|2.69974057968|(0.974,0.937,0.852)|-1
-SSMAQTVTQSQPEMSVQEAETVTLNCTYDTS-----NSNYYLFWYKQPPSRQMILIIRQ
EGF---KQ--QN---ATENRFSVNFQKAAKSFSLK------IS-DSQLGDTAMYFCAYR-
-----
>V79RF-AGCE01026520.1-trdv |(76513, 76813)|2.75611570659|(0.932,0.882,0.954)|-1
-FSIAQRVTQSESEMSVQEAETVTLNCTYDSS-----DSDYYLFWYKQPPSRHMILIIRQ
EAY---KQ--QN---ATENRFSVNFQKAAKSFSLK------IS-DSQLGDTAMYFCAYR-
-----
>V82RF-AGCE01026522.1-trav |(15303, 15602)|2.81669575519|(0.955,0.889,0.997)|-1
-VSSKQEVTQIPAALSVPEGESLVFNCSFTDS-----AI-YYLQWFRQDPGKGLTSLLLI
QSS---QR--EQ----TSGRLNASLDKSSRYSTLH------IA-ASQPGDSATYLCAVRH
S----
>V86RF-AGCE01026527.1-trav |(1820, 2116)|2.88284034555|(0.962,0.973,0.949)|-1
--VNSQQGEEEPQTLSIQEGENAIINCSYKTS------I-TSLQWYRQDSNRGLTQLILI
RSN---ER--EK----HSGRLRFMLDTSMKSSSLF------IA-AAQAADTAAYFCATEA
QC---
>V87RF-AGCE01026527.1-trav |(7054, 7345)|2.90853117661|(0.995,0.977,0.947)|-1
-RTYGDSVTQTEGPVTLPEGAALTLNCTYQSS-----YS-VFLFWYVQYLDKEPQLLLKS
S-E---NQ---E---TDSRGFQASHVKSDSSFRLE------KP-SVQLSDSAVYYCALR-
-----
>V88RF-AGCE01026527.1-trdv |(10273, 10576)|2.92806187285|(0.969,0.991,0.970)|-1
-SSMAQKVTQAQTEISVVEKEDVTLDCVYETS-----DTTYYLYWYKQPSAREMIFLIRQ
NSF---NE--QN---EISGRYSGNFQKSTSSFSLT------IA-ASQVIDSAVYFCALSE
-----
>V89RF-AGCE01026529.1-trav |(3178, 3469)|2.86106460747|(0.972,0.915,0.988)|-1
VWSQQKEVEQNPGSLSVPEGAIASLSCTYSNR-----AF-QYFMWYRQYSRKGPELLTFI
YSS---DK--K-----EDGRFTAQLNKSSQYISLF------IR-DSQPSDSATYLCAM--
-----
>V91RF-AGCE01026530.1-trav |(8602, 8899)|2.88894535923|(0.985,0.969,0.943)|-1
-DARAQSVTQPDIHITVSEGASLELRCNYSYG-----AT-PYLFWYVQSPGQGLQLLLRY
FSG---DT--LV---QGIKGFEAEFKRSQSSFNLR------KP-SVHWSDAAEYFCAVS-
-----
>V92RF-AGCE01026530.1-trav |(21106, 21396)|2.835463541|(0.920,0.956,0.978)|-1
--VNGENVEQHPSTLSVQVGDSSVINCTYSDS-----AS-NYFPWYKQELGKGPRLIIDI
RSN---VD--KR----KDGRMTVLLNKAAKHFSLH------IT-DTQPGDSALYFCAAG-
-----
>V93RF-AGCE01026530.1-trav |(40762, 41065)|2.9100682612|(0.972,0.959,0.980)|-1
VWS-QQKVEQNSGPLNVPEGVIASLNCTYSDR-----GS-QSFYWYRQYPGKSPELLMSV
YSS---G---N-----EDGRFTAQLNRASQYVSLL------IR-DSQLSDSATYLCAVST
RCSP-
>V95RF-AGCE01026531.1-trav |(478, 766)|2.9651161971|(0.989,0.978,0.999)|-1
VWSQQKEVEQDPGPFNVPEGTTVAFNCTYSNS-----AS-QYFFWYRQDPRKGPKLLMSV
YSS---G---N-----EDGRFTAQLNRASQYVSLL------IR-DSQLSDSATYLCAV--
-----
>V97RF-AGCE01026534.1-trav |(23755, 24045)|2.96304239695|(0.976,0.998,0.992)|-1
-MSSGEDVEQSR-FLSVQEGDSVVMNCTYTDS-----SS-SYLYWYKQEPGASLQLLAYI
LSN---TD--MK----QDQRLTVQLDKKNKHLSLH------VA-EAQTGDSAIYFCAES-
-----
>V98RF-AGCE01026534.1-trav |(44840, 45134)|2.63746130221|(0.837,0.942,0.966)|-1
-GISGDSVVQTEGEVLLSEGDSLTVNCSYEST-----GY-PSLFWYVQYPGKGPELLLKA
TKG---ND---K---GSNKDFEAIYRTETTSFHLE------KG-SVRESDSAVYFCALS-
-----
>V101RF-AGCE01112648.1-iglv |(492, 795)|2.95361205453|(0.989,0.980,0.985)|-1
-FVTSYELTQ-PHSVSVAPGQTARITCG---G---NNIGGKYTYWYQQKSGQSPVLVIYR
D---------NNRPSGIPERFSGSN--SGNTATLT------IS-GVQAGDEADYYCQVWD
SSSNH
>V102RF-AGCE01112648.1-iglv |(8719, 9022)|2.9538099056|(0.990,0.968,0.998)|-1
-SVVSSAMTQ-EPAVSVALGQTARITCQ---G---GGIGTYSANWYQQKPGQAPVLVIYD
N---------NNRPSGIPDRFSGSS--SGNTASLT------IT-GAQVEDEADYYCGSWD
SSGTH
>V104RF-AGCE01112674.1-iglv |(4938, 5247)|2.89892729297|(0.993,0.940,0.978)|-1
-SWAQSVLTQ-PPSASGAPGQRVTISCSGSSS---NIG-NNYANWYQQLPGKAPKLLIYG
N---------SNRPSGSPDRFSGSK--SDTSATLA------IT-GLQSADEADYYCETWD
SSLNA
>V107RF-AGCE01134619.1-igkv |(32675, 32987)|2.92963465422|(0.968,0.972,0.992)|-1
-TYGDIVMTQSPGSLAVSLGERVTINCKSSQSLL--SSSKNYLAWHQQKPGQAPKQIIVW
A---------STRVSGVPDRYSGSG--SGTDFTLT------IS-SLQAEDVAVYYCQQFY
SAP--
>V110RF-AGCE01135277.1-iglv |(31, 340)|2.97164868712|(0.983,1.000,0.990)|-1
-CWAQSVLTQ-PPSVSGNPGQRVTISCSGSSS---NIG-SSYVNWYQQLPGTAPKLLIYD
S---------NQRPSGVSDQFSGST--SGNSASLT------IT-GLQSADEADYYCQSYD
SNLKA
>V113RF-AGCE01147919.1-ighv |(4216, 4525)|2.98867205249|(0.999,1.000,0.990)|-1
-AHSQVQLVQ-SGAEVKKPGASVKISCKASGYT-F---TSYSMHWVQQAPGQGLEWIGYI
NTN--TGG--TNYAQKFQGRVTMTRDTSTSTAYME------LS-SLKSEDTAVYYCAR--
-----
>V114RF-AGCE01147923.1-ighv |(7327, 7634)|2.97432417086|(0.986,0.991,0.998)|-1
-VLSQVQLQE-SGPGLVKPSDTLSLTCAVSGYS-IS--SGYWWSWIRQPPGKALEWIGSI
YY---SGS--AYYNPSLKSRVTISTDMSKNQFSLR------MS-SVTAADTAVYYCA---
-----
>V115RF-AGCE01147939.1-iglv |(7498, 7807)|2.85659415562|(0.985,0.968,0.921)|-1
-VDSETVVTQ-EPSYLVSPGGTVTLTCGLSSG---SVSTSHYPSWYQQTPGQAPQMLIYS
T---------NTRPSGVPDRFSGSI--LGNKAALT------IK-GAQADDETDYYCMLYM
GSGI-
>V118RF-AGCE01148188.1-ighv |(110, 419)|2.96508424741|(0.998,0.971,0.999)|-1
-VQCEVQLVE-SGGGLAKPGGSLRLSCAASGFT-F---SDYWMGWVRQAPWKGLEWVGEI
NH--NGGS--TYYADSVKGRFTISRDNAKNSLYLQ------MN-SLRAEDTAVYYCAR--
-----
>V119RF-AGCE01148199.1-ighv |(2012, 2325)|2.95382541375|(0.998,0.999,0.962)|-1
-VQCEVQLVE-SGGGLAQPGGSLRLSCAASGFT-F---SNYWMNWVCQAPGKGLEWVGRI
KSKADGGT--AEYTASVKGRFTISRDDSKNMLYLQ------MR-SLKTEDTAVYYCA---
-----
>V121RF-AGCE01148386.1-ighv |(210, 517)|2.99596800026|(1.000,0.998,0.998)|-1
-VQCEVQLVE-SGGGLVKPGGSLRLSCAASGFT-L---SEYGMHWVRQAPGKGLEWVSFI
SYN--GGY--IHYADSVKGRFTISRDNAKNSLYLQ------MS-SLRAEDTAVYYCA---
-----
>V2RF-AACZ03050973.1-trgv |(700, 1013)|2.80263515099|(0.997,0.951,0.900)|1
-SQKSSNLEGRMKSVTRPTGSSAEITCDLIVI-----NA-VYIHWYLHQEGKSPQRLLYY
DVS---NSRDVLESGLSLGKYYTHTP-RRWSWILR------LQ-NLIENDSGVYYCATWD
-----
>V4RF-AACZ03053974.1-trbv |(14398, 14698)|2.8770082676|(0.985,0.992,0.918)|1
--LTEPEVTQTPSHQVTQMGQEVILRCVPISN-------HLYFYWYRQILGQKVEFLVSF
YNN---KI--SEKSEIFDDQFSVERPD-GSNFTLK------IR-STKLEDSAMYFCASSE
-----
>V6RF-AACZ03053974.1-trbv |(34490, 34786)|2.92993047006|(0.992,0.953,0.991)|1
--PVEAGVTQTPRYLIKARGQQVTLSCSPISG-------HRSVSWYQQTPGQGLQFLFEY
FSE---TQ--RNKG-NFPGRFSGRQFS-NSRSEMN------VS-TLELGDSALYLCASSL
-----
>V7RF-AACZ03053974.1-trbv |(41734, 42031)|2.99593600205|(1.000,1.000,0.996)|1
--PVNAGVTQTPKFQVLKTGQSMTLQCAQDMN-------HNSMYWYRQDPGMGLRLIYYS
VGE---GT--TDKGE-VPDGYNVSRLN-KREFSLR------LE-SAAPSQTSVYFCASSE
-----
>V8RF-AACZ03053975.1-trbv |(1894, 2207)|2.88794173299|(0.996,0.998,0.918)|1
--PMEMGVTQTPRHLVMGMTNKKSLKCEQHLG-------HNAMYWYKQSAKKPLELMFVY
NFK---EQ--TENNS-VPSRFSPECPN-SSHLFLH------LH-ALQPEDSALYLCASSQ
DTALQ
>V9RF-AACZ03053976.1-trbv |(3094, 3391)|2.96428751647|(0.975,0.998,0.995)|1
--PVNAGVTQSPKFRVLKTGQSMTLQCAQDMN-------HNYMYWYQQDPGMGLRLIHYS
AGE---GT--TAKGE-VPDGYNVSRLN-TQNFLLR------LE-SAAPSQTSVYFCATSE
-----
>V10RF-AACZ03053977.1-trbv |(2980, 3277)|2.99193200206|(0.999,0.998,0.995)|1
--PLDTAVSQTPKYLVTQMGKKESLKCEQNLG-------HNAMYWYKQDSKKFLKTMFIY
SNK---EP--ILNET-VPNRFSPDSPD-KAHLNLH------IN-SLELGDSAVYFCASSQ
-----
>V11RF-AACZ03053977.1-trbv |(6432, 6729)|2.96765257659|(0.998,0.982,0.989)|1
--PMEMGVTQTPRHLVMGMTNKKSLKCEQHLG-------HNAMYWYKQSAKKPLELMFVY
SLE---ER--VENNS-VPSRFSPECPN-SSHLFLH------LH-TLQPEDSALYLCASSQ
-----
>V12RF-AACZ03053977.1-trbv |(14911, 15208)|2.97853206285|(0.998,0.992,0.989)|1
--PVNAGVTQTPKFRVLKTGQSMSLLCAQDMN-------HEYMYWYRQDPGMGLRLIHYS
VGE---GT--TAEGE-VPDGYNVSRLK-KQNFLLG------LE-SAAPSQTSVYFCASSY
-----
>V13RF-AACZ03053979.1-trbv |(398, 698)|2.95682541375|(0.999,1.000,0.963)|1
--HTGAGVSQSPSNKVTEKGKDVELRCDPISG-------HTALYWYRQSLGQGLEFLIYF
QGN---SA--PDKSGLPSDRFSAERTG-GSVSTLT------IQ-RTQQEDSAVYLCASSL
-----
>V14RF-AACZ03053981.1-trbv |(4476, 4773)|2.9503601679|(0.989,0.977,0.985)|1
--PVIAGITQAPTSQILAAGRSMTLRCTQDMR-------HNAMYWYRQDLGLGLRLIHYS
NTA---GT--TGKGE-VPDGYSVSRAN-TDDFPLT------LA-SAVPSQTSVYFCASSD
-----
>V15RF-AACZ03053981.1-trbv |(8075, 8375)|2.97188623715|(0.999,0.999,0.976)|1
--HTGAGVSQTPSNKVTEKGKDVELRCDPISG-------HAALYWYRQSLGQGPEFLIYF
QGT---GA--ADDSGLPNDRFFAVRPE-GSVSTLK------IQ-RTEQGDSAVYLCASSL
-----
>V17RF-AACZ03053981.1-trbv |(15649, 15945)|2.94631770439|(0.996,0.967,0.987)|1
--PVDSGVTQTPKHLITATGQQVTLRCSPRSG-------DLSVYWYQQSLDQGLQFLIQY
YNG---EE--SAKG-NILERFSAQQFP-DLHSELN------LS-SLELGDSALYFCASSV
-----
>V18RF-AACZ03053981.1-trbv |(31375, 31675)|2.89548729347|(0.984,0.978,0.941)|1
--LSEAEVAQSPRYKITEKSQAVAFWCDPISG-------HATLYWYRQILGQGPELLVQF
QDE---SV--VDDSQLPKDRFSAERLK-GVDSILK------IQ-PAELGDSAMYLCASSL
-----
>V20RF-AACZ03053983.1-trbv |(4545, 4845)|2.75354005187|(0.976,0.949,0.873)|1
--LTEAGVAQSPRYKIIEKRQSVAFWCNPISG-------HATLYWYQQILGQGPKLLIQF
QNN---GV--VDDSQLPKDRFSAERLK-GVDSTLK------IQ-PAKLEDSAMYLCASSL
-----
>V21RF-AACZ03053983.1-trbv |(21546, 21843)|2.89656301427|(0.999,0.999,0.922)|1
--PVNAGVTQTPKFQVLKTGQSMTLQCAQDMN-------HKYMYWYRQDPGMGLRLIHYS
VGA---GI--TDKGE-VPNGYNVSRSN-TEDFPLS------LV-SAAPSQTSVYFCASSY
-----
>V22RF-AACZ03053983.1-trbv |(25762, 26062)|2.9898400105|(0.998,1.000,0.992)|1
--HTGAGVSQSPRYKVAKRGRDVALRCDSISG-------HVTLYWYRQTLGQGSEVLTYF
RSD---AQ--RDKSGRPSGRFSAERPE-RSVSTLK------IQ-RTEQGDSAVYLCASSL
-----
>V23RF-AACZ03053983.1-trbv |(33686, 33982)|2.97282001102|(0.994,0.988,0.991)|1
--PVDAGVTQSPTHLIKTRGQQVTLRCSPQSG-------HNTVSWYQQALGQGPQFIFQY
YRE---EE--NGRG-NFSPRFSGRQFP-NYSSELN------VN-ALELDDSALYLCASSL
-----
>V24RF-AACZ03053983.1-trbv |(40132, 40429)|2.96330822856|(0.993,0.991,0.980)|1
--PVNAGVTQTPKFRILKIGQSMTLQCAQDMN-------HNYMYWYRQDPGMGLKLIYYS
VGA---GI--TDKGE-VPNGYNVSRST-TEDFPLR------LE-SAAPSLTSVYFCASSY
-----
>V25RF-AACZ03053984.1-trbv |(12230, 12526)|2.96461205453|(0.990,0.994,0.981)|1
--PVDAGVTQSPTHLIKTRGQQVTLRCSPISG-------HTSVSWYQQALGQGPQFIFQY
YEK---EE--RGRG-NFPDRFSACQFP-NYSSELN------VN-ALLLGDSALYLCASSL
-----
>V26RF-AACZ03053986.1-trbv |(8, 308)|2.99193600205|(0.996,1.000,0.996)|1
--HTGAGVSQSPRYKVTKRGQDVTLRCDPISG-------HVALYWYRQALGQGPEFLTYF
NYE---AQ--PDKSGLPNDRFSAERPE-GSNSTLT------IQ-RTEQRDSAMYLCASSL
-----
>V27RF-AACZ03053987.1-trbv |(5059, 5356)|2.62844254041|(0.993,0.893,0.855)|1
--PMNAGVTQTPKFHILKTGQSMTLQCAQDMN-------HGYMSWYRQDPGMGLRLIYYS
AAA---GT--TDKGE-VPNGYNVSRLN-TEDFPLR------LV-SAAPSQTSVYFCASSY
-----
>V28RF-AACZ03053988.1-trbv |(2703, 3003)|2.96997252412|(0.996,0.995,0.980)|1
--HTGAGVSQSPRYKVTKRGQDVTLRCDPISS-------HATLYWYQQALGQGPEFLTYF
NYE---AQ--PDKSGLPNDRFSAERPE-GSNSTQT------IQ-RTEQRDSAMYLCASSL
-----
>V29RF-AACZ03053988.1-trbv |(11127, 11423)|2.98886400565|(0.997,0.992,1.000)|1
--PVDAGVTQSPTHLIKTRGQHVTLRCSPISG-------HTSVSWYQQALGQGPQFIFEY
YEK---EE--RGRG-NFPDRFSARQFP-NYSSELN------VN-ALLLGDSALYLCASSL
-----
>V30RF-AACZ03053988.1-trbv |(18445, 18742)|2.97588400513|(0.993,0.995,0.988)|1
--PVNAVVTQTPKFQVLKTGQSMTLQCAQDMN-------HDCMSWYRQDPGMGLRRIHYS
VAA---GI--TDKGE-VPDGYNVSRSN-KEDLPLR------LE-SAAPSQTSVYFCASSY
-----
>V31RF-AACZ03053988.1-trbv |(23071, 23371)|2.96576801985|(0.992,0.989,0.985)|1
--HTGAGVSQSPRYKVTKRGQDVALRCDPISG-------HVSLFWYQQALGQGPEFLTYF
RNE---AQ--LDKSGLPSDRFFAERPE-GSVSTLK------IQ-RTQQEDSAVYLCASSL
-----
>V32RF-AACZ03053988.1-trbv |(31286, 31582)|2.93443897096|(0.994,0.957,0.989)|1
--PVEAGVTQSPTHLIKTRGQQVTLRCSPISG-------HTSVYWYQQALGLGLQFLLWY
DEG---EE--RNRG-NFPRRFSGRQFP-NYSSELN------VN-ALELEDSALYLCASSL
-----
>V33RF-AACZ03053988.1-trbv |(40506, 40806)|2.9362535536|(0.988,0.955,0.998)|1
--HADTGVSQDPSHKITKRGQNVTFRCDPISE-------HNRLYWYRQTLGQCPEFLTYF
QNE---AQ--LEKSRLLSDRFSAERPK-GSFSTLE------IQ-HTEQGDSAIYLCASSL
-----
>V34RF-AACZ03053988.1-trbv |(47037, 47334)|2.94724064902|(0.997,0.959,0.997)|1
--SVAAGVIQSPRYLIKEKRETATLKCYPIPR-------HDTVYWYQQGPGQDPQFLISF
YEK---MQ--SDKG-SIPDRFSAQQFS-DYHSELN------MS-SLELGDSALYFCASSS
-----
>V35RF-AACZ03053988.1-trbv |(55269, 55566)|2.8783775175|(0.992,0.987,0.920)|1
--HMDAGITQSPRHKVTETGTPVTLRCHQTEN-------HRYMYWYRQDPGHGLRLIHYS
YDV---KD--TDKGE-VSDGYSVSRSK-TEDFLLT------LE-STTSSQTSVYFCAISE
-----
>V37RF-AACZ03053989.1-trbv |(12103, 12403)|2.98783600705|(0.999,0.994,0.995)|1
--HTDAGVIQSPRHEVTEMGQEVTLRCKPISG-------HNSLFWYRQTMMQGLELLIYF
NNN---VP--IDDSGMPKDRFSAKMPN-ASFSTLK------IQ-PSEPRDSAVYFCASSL
-----
>V39RF-AACZ03053991.1-trbv |(13707, 14007)|2.87094120885|(0.997,0.917,0.983)|1
--HIEAGVTQFPSHSVIEKGQTVTLRCDPVSG-------HDNLYWYRRVMGNEIKFLLHF
VKE---SK--QDESGMPNNRFLAERTG-GTYSTLK------VQ-PAELEDSGVYFCASSQ
-----
>V40RF-AACZ03053991.1-trbv |(18826, 19123)|2.8591025444|(0.957,0.934,0.971)|1
--HGDAKVIQNPRYQVTQFEKPVTLGCSQNLN-------HNVMYWYQQKSSQAPKLLFHY
YDK---DF--NNEAD-TPDNFQSRRPN-TSFCFLD------IR-SPGLGDAAMYLCATSR
-----
>V41RF-AACZ03053991.1-trbv |(23811, 24111)|2.95094800078|(0.982,0.985,0.984)|1
--SPGEEVTQTPKHLVRGEGQKAKLYCAPIKG-------HSYVFWYQQVLKKEFKFLISF
QNE---NV--FDKTGMPKERFSAKCLS-NSPCSLE------IQ-ATKLEDSAVYFCASSQ
-----
>V43RF-AACZ03053991.1-trbv |(44878, 45175)|2.90838789991|(0.971,0.998,0.945)|1
--TVDGGITQSPKYLFRKEGQNVTLNCEQNLN-------HDAMYWYRQDPGQGLRLIYYS
QIV---ND--FQKGD-IAEGYSVSREK-KESFPLT------VT-LAQKNPTAFYLCASSI
-----
>V45RF-AACZ03053992.1-trbv |(16518, 16818)|2.96496034001|(0.996,0.988,0.982)|1
--SFHAKVTQTPGHLVKGKGQKTKMDCTPEKG-------HVFVYWYQQNQNKEFMLLISF
QNE---QV--LQETEMHKKRFSSQCPK-NTPCSLA------IL-SSEPGDTALYLCASSQ
-----
>V47RF-AACZ03053992.1-trbv |(41278, 41575)|2.98066005261|(0.996,0.987,0.998)|1
--LMEADIYQTPRYLVIGTGKKIALECSQTMG-------HDKMYWYQQDPGMELHLIHYS
YGV---NS--TEKGD-LSSESTVSRIR-TEHFPLT------LE-SARPSHTSQYLCASSE
-----
>V48RF-AACZ03053994.1-trbv |(21067, 21364)|2.91736552535|(0.990,0.964,0.968)|1
--PLEAQVTQNPRYLITVTGKKLTVTCSQNMN-------HDYMSWYRQDPGLGLRQIYYS
VNV---EV--IDKGD-VPEGYNVSRKE-KRNFPLI------LE-SPSPNQTSLYFCASSL
-----
>V49RF-AACZ03053994.1-trbv |(26364, 26661)|2.98598400013|(0.996,0.994,0.996)|1
--LVDVKVTQSSRYLVKRMGEKVFLECVQDMD-------HENMFWYRQDPGLGLRLIYFS
YDV---KM--KEKGD-IPEGYSVSREK-KERFSLI------LE-SASTNQTSMYLCASSL
-----
>V53RF-AACZ03067000.1-trbv |(17891, 18182)|2.95080401921|(0.986,0.979,0.986)|1
--LMEAEIYQTPRHRVIGTGKKITLECSQTMG-------HDKMYWSRSRNGITPHPPFLW
--V---NS--TEKGD-LSSESTVSRIR-IERFPLT------LE-SASPSHTSQYLCASSE
-----
>V54RF-AACZ03067007.1-trbv |(7737, 8040)|2.97559608|(0.995,0.985,0.996)|1
-SVFSAVISQKPSRDICQRGTSMTIQCQVDSQ-------VTMMFWYCQQPGQSMTLIATA
NQG--SEA--TYESRFVIDKFPISRPN-LTFSTLT------VS-NRRPEDSSIYLCSVE-
-----
>V55RF-AACZ03070936.1-igkv |(7433, 7733)|3.0|(1.000,1.000,1.000)|1
-ARCDIQMTQSPSSLSASVGGRVTITCRASQGIS------NNLNWYQQKPGKTPKLLIYA
A---------SSLQSGIPSRFSDSG--SGTDYTLT------IS-SLQPEDFATYYCQQSD
STP--
>V56RF-AACZ03095312.1-trav |(40528, 40815)|2.77072055687|(0.932,0.924,0.916)|1
--VRSQQPVQSPQAVILREGEDAVINCSSSKA------L-YSVHWYRQKHGEAPVFLMML
LKG---GE--QK----GHDKISASFNEKKQQSSLY------LM-ASQLSYSGTYFCGAE-
-----
>V58RF-AACZ03095314.1-trav |(457, 747)|2.9889000027|(0.994,0.997,0.998)|1
-VSSEDKVVQSPLSLVVHEGDTVTLNCSYEVT-----NF-QSLLWYKQEK-KAPTFLFML
TSS---GI--EK----KSGRLSSILDKKELFSILN------IT-ATQTGDSAIYLCAVE-
-----
>V59RF-AACZ03095317.1-trdv |(27773, 28074)|2.75604920814|(0.990,0.894,0.925)|1
-SGMAQTVTQSQPEMSVQEAETVTLSCTYDTS-----ESNYYLFWYKQPPSRQMILVIRQ
EAY---KQ--QN---ATENRFSVNFQKAAKSFSLK------IS-DSQLGDTAMYFCAFM-
-----
>V60RF-AACZ03095317.1-trav |(36941, 37243)|2.989900005|(0.995,0.995,1.000)|1
-FSMAQTVTQTQPEMSVQEAETVTLSCTYDTS-----ESDYYLFWYKQPPSRQMILVIRQ
EAY---KQ--QN---ATENRFSVNFQKAAKSFSLK------IS-DSQLGDAAMYFCAYRS
-----
>V61RF-AACZ03095319.1-trav |(17030, 17318)|2.97821230726|(0.998,0.984,0.997)|1
-LSGELKVEQNPLFLSTQEGKNYTIYCNYSTT-----S--DRLYWYRQDPGKSLESLFVL
LSN---GA--VK----QEGQLMASLDTKARLSTLH------IT-AAVHDLSATYFCAV--
-----
>V66RF-AACZ03097612.1-trav |(9441, 9731)|2.99899600001|(1.000,0.999,1.000)|1
-MSRGEDVEQSL-FLSVREGDSSVINCTYTDS-----SS-TYLYWYKQEPGAGLQLLTYI
FSN---MD--MK----QDQRLTVLLNKKDKHLSLR------IA-DTQTGDSAIYFCAES-
-----
>V67RF-AACZ03097613.1-trav |(2901, 3189)|2.98793200206|(0.995,0.999,0.994)|1
--VKSQKIEQNSEALNIQEGKTATLTCNYTNY-----SP-AYLQWYRQDPGRGPVFLLLI
REN---EK--EK----RKERLKVTFDTTLKQGVFH------IT-ASQPADSATYLCAL--
-----
>V68RF-AACZ03097613.1-trav |(17275, 17562)|2.96868003481|(0.991,0.983,0.995)|1
-ANGENQVEHSPHFLGPQQGDVASMSCTYSVS-----RF-NNLQWYRQNTGMGPKHLLSM
YSA---GY--EK----QKGRLNATLLKNG--SSLY------IT-AVQPEDSATYFCAVD-
-----
>V69RF-AACZ03097613.1-trav |(45730, 46024)|2.9949000027|(0.996,0.999,1.000)|1
-GINGDSVVQTEGQVLLSEGDSLIVNCSYETT-----QY-PSLLWYVQYPGEGPQLLLKA
MKA---ND---N---GRNKGFEATYRKETTSFHLE------KD-SVQESDSAVYFCALS-
-----
>V70RF-AACZ03097613.1-trav |(59820, 60113)|2.99899600001|(1.000,0.999,1.000)|1
-GSGKNQVEQSPQSLIILEGKNCTLQCNYTVS-----PF-NNLRWYKQDTGRGPVSLTIM
TFS---EN--TK----SNGRYTATLDADTKQSSLH------IT-ASQLSDSASYICVVS-
-----
>V71RF-AACZ03097613.1-trav |(75553, 75841)|2.99593600205|(1.000,0.996,1.000)|1
VWSQRKEVEQDPGPFNVPEGATVAFNCTYSNS-----AS-QSFFWYRQDCRKEPKLLMSV
YSS---G---N-----EDGRFTAQLNRASQYISLL------IR-DSKLSDSATYLCAV--
-----
>V72RF-AACZ03097613.1-trav |(86767, 87064)|2.95328751647|(1.000,0.980,0.977)|1
-TVRAQSVTQPDIHITVSEGASLELRCNYSYG-----AT-PSLFWYVQSPGQGLQLLLKY
FSG---DT--LV---QGIKGFEAEFKRSQSSFNLR------KP-SVHWSDAAEYFCAVG-
-----
>V73RF-AACZ03097614.1-trav |(12294, 12584)|2.96080866856|(0.992,0.995,0.975)|1
--VNGENVEQHPSTLSVQEGDGAVIKCTYSDS-----AS-NYFPWYKQELGKGPQLIIDI
HSN---MG--EK----KDQRIAVTLNKTAKHFSLH------IT-ETQPEDSAVYFCAAS-
-----
>V74RF-AACZ03097614.1-trav |(31772, 32063)|2.96876801985|(0.993,0.990,0.986)|1
VWSQQKEVEQNSGPLSVPEGAIVSLNCTYSDR-----RS-QSFFWYRQYSGKSPELIMSI
YSN---GD--E-----EDGKFTAQLNKASQYVSLL------IR-DSQPSDSATYLCAV--
-----
>V75RF-AACZ03097614.1-trav |(38270, 38567)|2.96496800026|(0.987,0.989,0.989)|1
-GTRAQSATQLDSHVSVSEGALVLLRCNYSSS-----VP-PYLFWYVQYPNQGLQLLLKY
TTG---AT--LV---KGINGFEAEFKKSETSFHLT------KP-SAHVNDAAEYFCAVS-
-----
>V77RF-AACZ03097618.1-trav |(4827, 5130)|2.99798400013|(1.000,0.998,1.000)|1
-PGIAQKITQTQPGMFVQEKEAVTLDCTYDTS-----DQSYGLFWYKQPSSGEMIFLIYQ
GSY---DQ--QN---ATEGRYSLNFQKARKSANLV------IS-ASQLGDSAMYFCAMKE
-----
>V78RF-AACZ03097618.1-trav |(21644, 21938)|3.0|(1.000,1.000,1.000)|1
-RTRGDSVTQMEGPVTLSEEAFLTINCTYTAT-----GY-PSLFWYVQYPGEGLQLLLKA
TKA---DD---K---GSNKGFEATYRKETTSFHLE------KD-SVQASDSAVYFCALS-
-----
>V79RF-AACZ03097619.1-trav |(24003, 24296)|2.99071202074|(0.993,0.999,0.999)|1
VWSQQKEVEQDPGPLSVPEGAIASLNCTYSNS-----AF-QYFMWYRQYSRKGPELLMYT
YSS---DN--K-----EDGRFTAQVDKSSKYISLF------IR-DSQPSDSATYLCAMS-
-----
>V81RF-AACZ03097619.1-trav |(56042, 56329)|2.99385601037|(1.000,0.994,1.000)|1
--VNSQQGEEDPQALSIQEGENAIMNCSYKTS------I-NNLQWYRQNSGRGLVHLILI
RSN---ER--EK----HSGRLRVTLDTSKKSSSLL------IT-ASRAADTASYFCATD-
-----
>V82RF-AACZ03097619.1-trdv |(66115, 66418)|2.97580001921|(0.990,0.997,0.989)|1
-SSMAQKVTQAQTEISVVEKEDVTLDCVYETR-----DTTYYLFWYKQPPSGELVFLIRR
NSF---DE--QN---EISGRYSWNFQKSTSSFNFT------IT-ASQVVDSAVYFCALSE
-----
>V83RF-AACZ03097619.1-trav |(99749, 100036)|2.93226990764|(0.994,0.996,0.950)|1
-LSGEDQVTQSPEALRLQEGESSSLNCSYTVS-----GL-RGLFWYRQDPGKGPEFLFAL
YSA---GE--EK----EKERLKATLTKKE--SFLH------IT-APKPEDSATYLCAVQ-
-----
>V86RF-AACZ03097622.1-trdv |(8097, 8397)|2.71681664187|(0.972,0.853,0.949)|1
-SSVAQKVTQAQSSVSMPVRKAVTLNCLYEASW----W-SYYIFWYKQLPSKEMVFLIRQ
GSG---EQ---N---AKSGRYSVNFKKAAKSVALT------IS-ALQLEDSAKYFCAFWE
-----
>V90RF-AACZ03097899.1-ighv |(18928, 19237)|2.86125694504|(0.976,0.963,0.931)|1
-TYSQVQLVQ-SGHEVKQPGASVKVSCKASGYS-F---TTYGMNWVRQAPGQGLEWMGWF
NTY--TGN--PTYAQGFTGRFVFSMDTSVSTAYLQ------IS-SLKAEDTAMYYCAR--
-----
>V91RF-AACZ03097899.1-ighv |(75199, 75508)|3.0|(1.000,1.000,1.000)|1
-VQCEVQLLE-SGGGLVQPGGSLRLSCAASGFT-F---SSYWMHWVRQAPGKGLEWVSRI
NS--DGSS--TSYADSVKGRFTISRDNAKNTLYLQ------MN-SLRAEDTAVYYCTR--
-----
>V92RF-AACZ03097899.1-ighv |(83090, 83405)|3.0|(1.000,1.000,1.000)|1
-VQCEVQLVE-SGGGLVQPGGSLRLSCAASGFT-F---SGSAMHWVRQASGKGLEWVGRI
RSKANSYA--TAYAASVKGRFTISRDDSKNTAYLQ------MN-SLKTEDTAVYYCAR--
-----
>V93RF-AACZ03097900.1-ighv |(7950, 8265)|2.98683600705|(0.996,1.000,0.991)|1
-VQCEVQLLE-SGGGLVQPGGSLRLSCAASGFT-F---SDYYMDWVRQAPGKGLEWVGRI
RNKANSYT--TEYAASVKGRFTISRDDSKNSLYLQ------RN-SLKTEDTAVYYCTR--
-----
>V94RF-AACZ03097900.1-ighv |(23404, 23719)|2.97768136355|(0.982,1.000,0.998)|1
-VQCEVQLVE-SRGGLVQPGGSLRLSCAVSGFT-F---SDYYMSWVRQAPGKGLEWVGFI
RNKANGGT--TEYTTSVKGRFTISRDDSKSITYLQ------MN-SLKTEDTAVYYCSR--
-----
>V97RF-AACZ03097900.1-ighv |(75733, 76039)|3.0|(1.000,1.000,1.000)|1
-VQCEVQLVE-SGGGLVQPGGSLRLSCAASGFT-F---SSYHMSWVRQAPGKGLEWVSVI
YS--G-GS--TYYADSVKGRFTISRDNSKNTLYLQ------MN-SLRAEDTAVYYCAR--
-----
>V98RF-AACZ03097900.1-ighv |(92730, 93036)|3.0|(1.000,1.000,1.000)|1
-VQCEVQLVE-SGGGLVQPGGSLRLSCAASGFT-F---SSYAMHWVRQAPGKGLEWVSLI
YS--G-DS--TYYADSVKGRFTISRDNSKNTLYLQ------MG-SLRAEDTAVYYCAR--
-----
>V99RF-AACZ03097904.1-ighv |(3428, 3734)|2.98980401921|(0.999,0.992,0.999)|1
-VLSQLQLQE-SGPGLVKPSETLSLTCTVSGGS-I---SSYYWSWIRQPPGKGLEWIGYI
YY---SGS--AYYNPSLKSRVTISVDTSKNQFSLK------LS-SVTAADTAVYYCAR--
-----
>V101RF-AACZ03097906.1-ighv |(13610, 13916)|3.0|(1.000,1.000,1.000)|1
-VQCEVQLVE-SGGGLVQPGGSLRLSCAASGFT-V---SSYHMSWVRQAPGKGLEWVSVI
YS--G-GS--TYYADSVKGRFTISRDNSKNTLYLQ------MN-SLRAEDTAVYYCAR--
-----
>V103RF-AACZ03097906.1-ighv |(49257, 49572)|2.99594800078|(0.997,0.999,1.000)|1
-VQCEVQLVE-SGGGLVQPGRSLRLSCTASGFT-F---GDYAMSWIRQAPGKGLEWVGFI
RSKAYGGT--TEYAASVKGRFTISRDDSKSIAYLQ------MN-GLKTEDTAVYYCTR--
-----
>V105RF-AACZ03097906.1-ighv |(72260, 72569)|2.9774040992|(0.987,0.997,0.994)|1
-AHSQVQLVQ-SGAEVKKPGASVKVSCKASGYT-F---TSYTISWLRQAPGQGLEWMGVI
SPS--DGS--TSYAQKFQGRVTMTRDTSTSTVYME------LS-SLRSEDTAVYYCAR--
-----
>V106RF-AACZ03097906.1-ighv |(76385, 76694)|2.98896000066|(0.997,0.998,0.994)|1
-AYSQMQLVQ-SGAEVKKPGSSVKVSCKASGYT-F---TYRYLHWVRQAPGQALEWMGWI
TPY--NGN--TNYAQKFQDRVTITRDRSMSTAYME------LR-SLRSEDSAVYYCAR--
-----
>V107RF-AACZ03097910.1-ighv |(1033, 1344)|2.99389600501|(1.000,0.999,0.995)|1
-VQCEVQLVE-SGGGVVQPGGSLRLSCAASGFT-F---DDYAMHWVRQAPGKGLEWVSLI
SW--DGGS--TYYADSVKGRFTISRDNSKNSLYLQ------MN-SLRAEDTALYYCAKD-
-----
>V108RF-AACZ03097912.1-ighv |(17400, 17707)|2.96619965751|(1.000,0.995,0.974)|1
-VQCEVQLVE-SGGGLVQPESSLKLSCAASGFT-F---SSYAMNWVRQAPGKGLEWVAHI
WN--DGSQ--KYYADSVKGRFTISRDNSKSMLYLQ------MD-SLKAEDTAMYYCT---
-----
>V109RF-AACZ03097916.1-ighv |(3845, 4154)|2.98237212748|(1.000,0.989,0.994)|1
-VLSQVQLQE-SGPGLVKPSETLSLTCAVSGYS-IS-S-GYYWGWIRQPPGKGLEWIGSI
YHS---GS--TYYNPSLKSRVTISVDTSKNQFSLK------LS-SVTAADTAVYYCAR--
-----
>V111RF-AACZ03098145.1-ighv |(4162, 4471)|2.98410021834|(0.988,1.000,0.997)|1
-VQCQVQLVE-SGGGVVQPGRSLRLSCAASGFT-F---SSYGMHWVRQAPGKGLEWVAFI
SYD--GSN--KHYADSVRGRFTISRDNSKNTLYLQ------MN-RLRAEDTAVYYCAR--
-----
>V114RF-AACZ03098176.1-ighv |(689, 998)|2.90855005294|(0.994,0.963,0.960)|1
-VQCQVRLVE-SGGGVVQPGRSLRLSCAASGFT-F---SSYGMHWVRQAPGKGLEWVAFI
QY--DGSN--KYYADSVKGRFTISKDNSKNTLYLQ------MN-SLRAEDTAVYYCAR--
-----
>V117RF-AACZ03106490.1-ighv |(5495, 5804)|2.98894800078|(0.996,0.994,0.999)|1
-VQCEVQLVE-SGGGLVQPGGSLRLSCAASGFT-F---SSYWMHWVRQAPGKGLVWVSRI
NS--DGSS--TSYADSLKGQFTISRDNAKNTLYLQ------MN-SLRAEDMAVYYCTR--
-----
>V120RF-AACZ03126842.1-igkv |(27906, 28206)|2.98070483945|(1.000,1.000,0.982)|1
-ARCDIQMTQSPSSLSASVGDRVTITCRASQGIS------NNLNWYQQKPGKTPKLLIYA
A---------SSLQSGIPFRFSDSG--SGTDYTLT------IS-SLQPEDFATYYCQQSD
STP--
>V121RF-AACZ03127129.1-iglv |(13910, 14207)|2.95737067436|(0.998,0.964,1.000)|1
-SVASYELTQ-PSSVSVSPGQTARITCS---G---DVLAKNYARWFQQKPGQAPVLVIYK
D---------SERPSGIPERFSGSS--SGTTVTLT------IS-GAQVEDEADYYCYSAA
DNN--
>V122RF-AACZ03127129.1-iglv |(32581, 32884)|2.99192000218|(0.998,0.994,1.000)|1
-SEASYELTQ-PPSVSVSPGQTARITCS---G---DALPKQYAYWYQQKPGQAPVLVIYK
D---------SERPSGIPERFSGSS--SGTTVTLT------IS-GVQAEDEADYYCQSAD
SSGTY
>V123RF-AACZ03127131.1-iglv |(7169, 7472)|2.98050011724|(0.998,0.996,0.987)|1
-SVTSYELTQ-PPSVSVAPGQTARITCG---G---NNIGSKAVHWYQQKPGQAPVLVIYY
D---------SDRPSGIPERFSGSN--SGNTATLT------IS-RVEAGDEADYYCQVWD
SSSKH
>V124RF-AACZ03127131.1-iglv |(15097, 15400)|2.99288400513|(1.000,0.995,0.998)|1
-SVVSSELTQ-DPAVSVALGQTVRITCQ---G---DSLRSYYASWYQQKPGQAPVLVIYG
N---------NNRPSGIPDRFSGSS--SGNTASLT------IT-GAQAEDEADYYCSSLD
SSGNH
>V125RF-AACZ03127135.1-iglv |(12358, 12661)|2.92616849053|(1.000,0.941,0.999)|1
-SEASYELTQ-PPSVSVSLGQTARITCS---G---EALPKKYAYWYQQKPGQAPVLVIYK
D---------SERPSGIPERFSGSS--SGTIVTLT------IS-GVQAEDEADYYCQSAD
SSGTY
>V128RF-AACZ03127139.1-iglv |(22125, 22435)|2.9455031224|(0.991,0.991,0.966)|1
-SWAQSALTQ-PPSVSRSPGQSVTISCTGTSS---DVGGYNYVSWYQQHPGKAPKLMIYD
V---------SKRPSGVPDRFSGSK--SGNTASLT------IS-GLQAEDEADYYCCSYA
GSYS-
>V129RF-AACZ03127139.1-iglv |(41415, 41718)|2.99696400065|(1.000,0.997,1.000)|1
-SEASYELTQ-PPSVSVSPGQTARITCS---G---DALPKQYAYWYQQKSGQAPVLIIYE
D---------SKRPSGIPERFSGSS--SGTMATLT------IS-GAQVEDEADYYCYSTD
SSGNH
>V133RF-AACZ03127143.1-iglv |(3944, 4240)|2.9929000027|(1.000,0.996,0.997)|1
-SVASYELTQ-PPSVSVSPGQTASITCS---G---DKLGDKYAYWYQQKSGQSPVLVIYQ
D---------SKRPSGIPERFSGSN--SGNTATLT------IS-GTQAMDEADYYCQAWD
SST--
>V136RF-AACZ03151853.1-igkv |(48491, 48784)|3.0|(1.000,1.000,1.000)|1
-ARCDIQMTQSPSSLSASVGDRVTITCRASQSIS------NYLSWYQQKPGKAPKLLIYD
A---------STLQSGVPSRFSGSG--SGTDFTLT------IS-SLQPEDFATYYCQRGY
G----
>V137RF-AACZ03151853.1-igkv |(70778, 71078)|2.96011198542|(1.000,0.965,1.000)|1
-ARCDIQLTQSPSSLSASVGDRVTITCQASQDIS------NYLNWYQQKPGKVPKLLIYS
A---------SNLQSGVPSRFSGSG--SGTDFTLT------IS-SLQPEDVATYYCQRTY
NAP--
>V140RF-AACZ03151853.1-igkv |(133574, 133889)|2.97554805197|(0.997,0.989,0.990)|1
-SSADIVMTQTPLSLSVTPGQPASISCKSSQSLLHS-DGNTYLYWYLQKPGQSPQLLIYR
V---------SNRASGVPDRFSGSG--SGTDFTLK------IS-QVEAEDVGVYYCMQGI
QLP--
>V141RF-AACZ03151853.1-igkv |(146050, 146365)|2.71240530194|(0.994,0.827,0.997)|1
-SSGDIVMTQSPLSLPVTPGEPASISCRSSQSLLHS-NRYNYLDWYLQKPGQSPQLLIYL
G---------SNRASGVPDRFSGSG--SGTDFTLK------IS-RVEAEDVGVYYCMQAL
QTP--
>V142RF-AACZ03151853.1-igkv |(154335, 154635)|2.98184466791|(1.000,0.983,1.000)|1
-TRCDIQMTQSPSSLSASVGDRVTITCWASQGIS------NYLAWYQQKPGKVPKLLIYA
A---------STLQSGVPSRFSGSG--SGTDFTLT------IS-SLQPEDVATYYCQKYN
SAP--
>V143RF-AACZ03151853.1-igkv |(190625, 190927)|2.982900005|(0.996,0.996,0.991)|1
-SSGDIVMTQTPLSSPVTLGQPASISCRSSQSLVHS-DGNTYLSWLQQRPGQPPRLLIYK
V---------SNRFSGVPDRFSGSG--AGTDFTLK------IS-RVEAEDVGVYYCTQA-
-----
>V145RF-AACZ03151855.1-igkv |(12698, 12994)|2.98540816598|(1.000,0.988,0.998)|1
-TTGEIVLTQSSATLSLSPGERATLSCRASQSVS-----SSYLAWYQQKPGQAPRLLIYD
A---------SSRATGIPDRFSGSG--SGTDFTLT------IS-RLEPEDFAVYYCQQYG
S----
>V146RF-AACZ03151855.1-igkv |(28194, 28494)|2.99398000014|(0.999,0.997,0.998)|1
-ARCDIQMTQSPSSLSASVGDRVTITCRASQGIS------NYLAWFQQKPGKAPKRLIYA
A---------SSLQSGVPSRFSGSG--SGTEFTLT------IS-SLQPEDFATYYCLQHN
SYP--
>V147RF-AACZ03151855.1-igkv |(45639, 45939)|2.99899600001|(1.000,0.999,1.000)|1
-ARCDIQMTQSPSSLSASVGDRVTITCRASQGIS------SWLAWYQQKPGKAPKPLIYA
A---------SSLQSGVPSRFSGSG--SGTEFTLT------IS-SLQPEDFATYYCQQYN
SYP--
>V149RF-AACZ03151857.1-igkv |(4301, 4601)|2.99280401921|(1.000,0.993,1.000)|1
-ARCAIQLTQSPSSLSASVGDRVTITCRASQGIS------NRLNWYQQKPGKAPKLLIYD
A---------SSLESGVPSRFSGSG--SGTDFTLT------IS-SLQPEDFATYYCQQFN
SYP--
>V150RF-AACZ03151857.1-igkv |(10072, 10372)|2.95096883512|(1.000,1.000,0.958)|1
-ASCDIQMTQSPSSVSASVGDRVTITCQASQGIS------SWLAWYQQKPGKAPKLLIYA
A---------SSLQSGVPSRFSGNG--SGTDFTLT------IS-SLQPEDFATYYCQQAN
SFP--
>V151RF-AACZ03151858.1-igkv |(2327, 2627)|2.97754104219|(1.000,0.998,0.981)|1
-TTGEIVLTQSPATLSLSPGEKATLSCRASQSVS------SYLAWYQQKPGQAPRLLIYD
A---------SNRATGISARFSGSG--SGTDFTLT------IS-SLEPEDFAVYYCQQRS
NWH--
>V152RF-AACZ03151858.1-igkv |(39404, 39704)|2.98221630725|(0.999,0.985,0.999)|1
-ARCAIQMTQSPSSLSASVGDRVTITCRASQGIS------SYLAWYQQKPAKAPKLLIYY
A---------SSLQSGVPSRFSGSG--SGTEFTLT------IS-SLQPEDFATYYCQQLN
SYP--
>V154RF-AACZ03151979.1-igkv |(10219, 10519)|2.99286400565|(0.995,1.000,0.998)|1
-AKCDIQMTQSPSTLSASVGDRVTITCRASQGIS------SYLNWYQQKPGKAPKLLIYA
A---------STLESGVPSRFSGSG--SGTEFTLT------IS-SLQPDDFATYYCQQYS
STP--
>V157RF-AACZ03171037.1-ighv |(52793, 53102)|2.99596000066|(1.000,0.997,0.999)|1
-VQCEVQLVE-SGGGLVKPGGSLRLSCAASGFT-F---SSYAMHWVRQAPEKGLEWVSTI
SG--SGGS--TWYPDSVKGRFTISRDNSKNTLYLQ------MN-SLRAEDTAVYYCAR--
-----
>V158RF-AACZ03171037.1-ighv |(63661, 63976)|2.99899600001|(1.000,1.000,0.999)|1
-VQCEVQLVE-SGGGLVKPGGSLRLSCAASGFT-F---SSYSMNWVRQAPGKGLEWVGFI
RTKAKGGT--TEYAASVKGRFTISRDDSKSIAYLQ------MN-SLKTEDTAVYYCTR--
-----
>V159RF-AACZ03171037.1-ighv |(86377, 86686)|3.0|(1.000,1.000,1.000)|1
-VQCEVQLVE-SGGGLVQPGGSLRLSCAASGFT-F---SSYGMHWVRQAPGKGLEWVSYI
SYD--SSY--IYYADSVKGRFTISRDNAKNSLYLQ------MN-SLRAEDTAVYYCAT--
-----
>V160RF-AACZ03171037.1-ighv |(116832, 117141)|2.98070483945|(1.000,1.000,0.982)|1
-VQCEVQLVE-SGGGLVQPGGSLRLSCAASGFT-F---DDYGMSWVRQAPGKGLEWVSLI
SW--DGGS--TYYADSVKGRFTISRDNSKNSLYLQ------MS-SLRAEDTALYYCAR--
-----
>V161RF-AACZ03171037.1-ighv |(129850, 130159)|2.99698000014|(1.000,0.999,0.998)|1
-AHSQVQLVQ-SGAEVKKPGASVKVSCKASGYT-F---TSYDINWVRQATGQGLEWMGWM
NPN--SGN--TGYAQKFQGRVTMTRDTSISTAYME------LS-SLRSEDTAVYYCAR--
-----
>V162RF-AACZ03171037.1-ighv |(150598, 150907)|2.99199600001|(0.997,0.998,0.997)|1
-VQCEVQLVE-SGGGLVQPGGSLTLSCAASGFT-F---SSYWMSWVRQAPGKGPEWVANI
KKD--GSE--KYYADSVKGRFTISRDNAKNSLYLQ------MN-SLRAEDTAVYYCTR--
-----
>V165RF-AACZ03171037.1-ighv |(187799, 188108)|2.96800187489|(0.996,1.000,0.974)|1
-AHSQVQLVQ-SGSEVKKPGASVKVSCKASGYT-F---TSYAMNWVRQAPGQGLEWMGWI
NTN--TGN--PTYAQGFTGRFVFSLDTSVSTAYLQ------IS-SLKAEDTAVYYCAR--
-----
>V166RF-AACZ03171037.1-ighv |(200692, 201001)|2.98567205249|(0.998,0.999,0.989)|1
-VLSQVQLQE-SGPGLVKPSETLSLTCAVSGGS-IS--SSNWWSWVRQPPGKGLEWIGEI
YH---SGS--PNYNPSLKSRVTISVDKSKNQFSLK------LS-SVTAADTAVYYCAR--
-----
>V167RF-AACZ03171395.1-trav |(594, 882)|2.98793200206|(0.995,0.999,0.994)|1
--VKSQKIEQNSEALNIQEGKTATLTCNYTNY-----SP-AYLQWYRQDPGRGPVFLLLI
REN---EK--EK----RKERLKVTFDTTLKQGVFH------IT-ASQPADSATYLCAL--
-----
>V172RF-AACZ03176953.1-iglv |(46517, 46826)|2.99899600001|(1.000,1.000,0.999)|1
-SWAQSVLTQ-PPSASGTPGQRVTISCSGSSS---NIG-SNTVNWYQQLPGTAPKLLIYS
N---------NQRPSGVSDRFSGSK--SGTSASLA------IS-GLRSEDEADYYCAAWD
DSLSG
>V174RF-AACZ03176987.1-iglv |(5895, 6205)|2.99067605248|(1.000,0.991,1.000)|1
-SWANFMLTQ-PHSVSESPGQTVTISCTRSSG---SIA-SDYVQWYQQRPGSAPTTVIYE
D---------NRRPSGVPDRFSGSIGSSSNSASLT------IS-GLKSEDEADYYCQSYD
SSS--
>V175RF-AACZ03179884.1-ighv |(12665, 12971)|2.9949000027|(0.996,1.000,0.999)|1
-VQCEVQLVQ-SGGGLVQPGGSLRLSCAGSGFT-F---SSYAMHWVRQAPGKGLEWVSAI
GT---GGG--TYYADSVKGRFTISRDNAKNSLYLQ------RN-SLRAEDMAVYYCAR--
-----
>V176RF-AACZ03182257.1-ighv |(5938, 6245)|3.0|(1.000,1.000,1.000)|1
-AQCEVQLVE-SGGGLVQPGGSLRLSCAASGFT-F---SNHYTSWVLQAPGKGLEWVSYI
SGD--RGY--TNYADSVKGRFTISRDNAKNSLYLQ------MN-SLRAEDTAVYYCV---
-----
>V177RF-AACZ03015561.1-igkv |(2130, 2430)|2.93682633717|(0.998,0.998,0.950)|-1
-AKCDIQMTQSPSTLSASVGDRVTITCRASQGIS------SWLAWYQQKPGKAPKLLIYK
A---------SSLESGVPSRFSSSG--SGTEFTLT------IS-SLQPDDFATYYCQQYS
SYP--
>V178RF-AACZ03015561.1-igkv |(34244, 34556)|2.94854053568|(0.983,0.997,0.970)|-1
-CNGDIVLTQSPASLAVSPGQRATITCRASESVSFL--GINLIHWYQQKPGQPPKLLIYQ
A---------SNKDTGVPARFSGSG--SGTDFTLT------IN-LVEANDTANYYCLQSK
NFP--
>V179RF-AACZ03015562.1-igkv |(7056, 7356)|3.0|(1.000,1.000,1.000)|-1
-TRCDIQMTQSPSSLSASVGDRVTITCRASQGIS------NYLAWYQQKPGKAPKLLIYY
A---------SRLESGVPSRFSGSG--SGTDYTLT------IS-SLQPEDFATYYCQQYN
SNP--
>V180RF-AACZ03015562.1-igkv |(21131, 21434)|2.97549304411|(1.000,0.996,0.981)|-1
-TIGEIVMTQSPATLSLSPGERATLSCRASQSVS-----SSYLSWYQQKPGQAPRLLIYG
A---------STRATGIPARFSGSG--SGTDFTLT------IS-SLQPEDFAVYYCQQDY
KLP--
>V181RF-AACZ03015562.1-igkv |(33603, 33903)|2.99067605248|(1.000,0.991,1.000)|-1
-ARCDIQMTQSPSSLSASVGDRVTITCRASQGIR------NDLGWYQQKPGKAPKLLIYA
A---------SSLQSGVPSRFSGSG--SGTDFTLT------IS-SLQPEDFATYYCLQDY
NYS--
>V182RF-AACZ03015564.1-igkv |(7726, 8026)|2.99899600001|(1.000,0.999,1.000)|-1
-TRCDIQMTQSPSSLSASVGDRVTITCRASQSIS------NSLAWYQQKPGKAPKLLIYA
A---------SRLESGVPSRFSGSG--SGTDYTLT------IS-SLQPEDFATYYCQQYY
STP--
>V183RF-AACZ03015754.1-igkv |(14686, 14986)|3.0|(1.000,1.000,1.000)|-1
-ARCDIQVTQSPSSLSASVGDRVTITCRTSQGIS------NGLSWYQQKPGQAPTLLIYA
A---------SSLQSGIPSRFSGSG--SGTDFTLT------IS-SLQPEDVATYYCLQDY
TTP--
>V185RF-AACZ03016143.1-igkv |(754, 1054)|2.88343797113|(0.981,0.932,0.980)|-1
-ARCAIQMTQPPSSLFASVGDSVTITCRASQSV--------TNHWYQQKPGKAPKLLIYR
V---------SSLQMGVPSRFSGSG--SGTDFTLT------IS-SLQPDDVATYYCQQEY
TVGVT
>V187RF-AACZ03095321.1-trdv |(4778, 5084)|2.92402032645|(0.982,0.968,0.975)|-1
RGMLCDKVTQSSPDQTVASGSEVVLLCTYDAV-----YSNPDLFWYRIRPDYSFQFVFYG
DNS---RS--QA-ADFTQGRFSVKHILTQKAFHLV------IS-PVRTEDSATYYCAF--
-----
>V188RF-AACZ03098097.1-ighv |(6348, 6654)|2.93405224805|(0.987,0.990,0.960)|-1
--HSQVQLVQ-SGAEVKKLGASVKVSCKASGYT-F---TDYFIHWVQQAPGQGLEWMGWI
NPN--SGG--TNYAQKFQSRVTMTRNTSISTAYME------LS-RLRSDDTAVYYCAR--
-----
>V190RF-AACZ03098100.1-ighv |(12261, 12570)|2.98567205249|(0.998,0.999,0.989)|-1
-VLSQVQLQE-SGPGLVKPSETLSLTCAVSGGS-IS--SSNWWSWVRQPPGKGLEWIGEI
YH---SGS--PNYNPSLKSRVTISVDKSKNQFSLK------LS-SVTAADTAVYYCAR--
-----
>V191RF-AACZ03098100.1-ighv |(19369, 19678)|2.99385601037|(1.000,0.994,1.000)|-1
-AHSQVQLVQ-SGAEVKKPGASVKVSCKASGYT-F---TSYAMHWVRQAPGQRLEWMGWI
NTG--NGN--TKYSQKFQGRVTITRDTSASTAYME------LS-SLRSEDTAVYYCAR--
-----
>V193RF-AACZ03127313.1-iglv |(14865, 15172)|2.9898720041|(0.994,0.998,0.998)|-1
-SWANFMLTQ-PHSVSESPGQTVTISCTRSSG---SIA-SDYVQWYQQRPGSAPTTVIYE
D---------NRRPSGVPDRFSGSIDSSSNSASLT------IS-GLKTEDEADYYCQSYD
SS---
>V195RF-AACZ03127321.1-iglv |(54420, 54720)|2.91739010128|(0.985,0.963,0.972)|-1
-SLSQLVLTQ-SPSASASLGASVKLTCTLSSG---H--SSYAIAWHQQQPEKGPRYLMKL
NSD---GS--HSKGDGIPDRFSGSSSG--AERYLT------IS-SLQSEDEADYYCQTW-
-----
>V196RF-AACZ03127321.1-iglv |(122715, 123024)|2.95194425777|(0.996,0.990,0.969)|-1
-VDSQTVVTQ-EPPFSVSPGGTVTLTCGLSSG---SVSTSYYPSWYQQTPGQAPRTLIYS
T---------NTRSSGVPGRFFGSI--IGNKAALT------IT-GAQADDESDYYCLLYM
GSGI-
>V197RF-AACZ03151873.1-igkv |(7769, 8069)|2.99098000014|(0.996,0.998,0.997)|-1
-ARCDIQMTQSPSSLSASVGDRVTITCRASQGIN------NNLNWYQQKPGKTPKLLIYA
A---------SSLQSGIPSRFCDSG--SGTDYTLT------IS-SLQPEDFATYYCQQSD
GTP--
>V198RF-AACZ03151911.1-igkv |(7475, 7775)|2.95253496597|(0.998,0.999,0.961)|-1
-ARCDIQMTQSTSSLSASVGDRVTITCRASQGIS------NNLNWYQQKPGKTPKLLIYA
A---------SSLQSGILSRFSDSG--SGTDYTLT------IS-SLQPEDFAAYYCQQSD
STP--
>V201RF-AACZ03171149.1-trav |(1638, 1925)|2.97478801933|(0.990,0.997,0.988)|-1
-VSSEDKVVQSPLSLVVHEGDTVTLNCSYEVT-----NF-QSLLWYKQEK-KAPTFLFML
TSS---GI--EK----KSGRLSSILDKKELF-SIL------NT-ATQTGDSAIYLCAVE-
-----
>V202RF-AACZ03171512.1-trav |(590, 893)|2.99289600501|(0.999,0.994,1.000)|-1
-PGIAQKITQTQPGMFVQEKEAVTLDCTYDTS-----DPSYGLFWYKQPSSGEMIFLIYQ
GSY---DQ--QN---ATEGRYSLNFQKARKSANLV------IS-ASQLGDSAMYFCAVRE
-----
>V204RF-AACZ03172648.1-ighv |(10152, 10459)|3.0|(1.000,1.000,1.000)|-1
-AQCEVQLVE-SGGGLVQPGGSLRLSCAASGFT-F---SNHYTSWVLQAPGKGLEWVSYI
SGD--SGY--TNYADSVKGRFTISRDNAKNSLYLQ------MN-SLRAEDTAVYYCV---
-----
>V205RF-AACZ03172650.1-ighv |(24637, 24943)|3.0|(1.000,1.000,1.000)|-1
-VQCEVQLVQ-SGGGLVQPGGSLRLSCAGSGFT-F---SSYAMHWVRQAPGKGLEWVSAI
GT---GGG--TYYADSVKGRFTISRDNAKNSLYLQ------MN-SLRAEDMAVYYCAR--
-----
>V207RF-AACZ03177116.1-iglv |(1182, 1492)|2.99099200002|(0.997,0.998,0.996)|-1
-SWAQSALTQ-PASVSGSPGQSITISCTGTSS---DVGGYNAVSWYQQHPGKAPKLMIYD
V---------NKRPSGVSNRFSGSK--SGNTASLT------IS-GLQAEDEADYYCSSYR
SGGT-
>V208RF-AACZ03178854.1-igkv |(8334, 8634)|2.99280401921|(1.000,0.993,1.000)|-1
-ARCDIQMTQSPSSLSASVGDRVTITCWASQGIS------NNLNWYQQKPGKTPKLLIYA
A---------SSLQSGIPSRFSDSG--SGTDYTLT------IS-SLQPEDFATYYCQQSD
STS--
>V209RF-AACZ03179013.1-igkv |(41180, 41480)|3.0|(1.000,1.000,1.000)|-1
-ARCDIQMTQSPSSLSASVGDRVTITCRASQGIS------NNLNWYQQKPGKTPKLLIYA
A---------SSLQSGIPSRFSDSG--SGTDYTLT------IS-SLQPEDFATYYCQQSD
STP--
>V210RF-AACZ03179105.1-trdv |(5604, 5904)|2.62341399606|(0.970,0.807,0.949)|-1
-SSVAQKVTQAQSSVSMPVRKAVTLNCLYEASW----W-SYYIFWYKQLPSKEMIFLIRQ
GSD---EQ---N---AKSGRYSVNFKKAAKSVALT------IS-ALQLEDSAKYFCALWE
-----
>V214RF-AACZ03179806.1-igkv |(3188, 3488)|2.99798400013|(1.000,0.998,1.000)|-1
-ARCDIQMTQSPSSLSASVGDRVTITCRASQGII------NNLNWYQQKPGKTPKLLIYA
A---------SSLQSGIPSRFSDSG--SGTDYTLT------IS-SLQPEDFATYYCQQSD
STP--
>V215RF-AACZ03183442.1-igkv |(591, 891)|2.98694800078|(0.994,0.996,0.997)|-1
-ARCDIQMTQSPSSMSASVGDRVTITCRASQGIN------NNLNWYQQKPGKTPKLLIYA
A---------SSLQSGIPSRFCDSG--SGTDYTLT------IS-SLQPEDFATYYCQQSD
GTP--
>V216RF-AACZ03191230.1-iglv |(228, 538)|2.95417917488|(0.991,1.000,0.966)|-1
-SWAQSALTQ-PPSVSGSPGQSVTISCTGTSS---DVGGYNYVSWYQQHPGTAPKLMIYD
V---------SKRPSGVPDRFSGSK--SGNTASLT------IS-GLQAEDEADYYCCSYA
GSYS-
>V0RF-CABD02043817.1-igkv |(3028, 3328)|2.99293200206|(0.996,0.997,1.000)|1
-ARCDIQMTQSPSSLSASVGDRVTITCQASQGIS------NNLNWYQQKPEKTPKLLIYA
A---------SSLQSGIPSRFSDSG--SGTDYTLT------IS-SLQPEDFATYYCQQSD
STP--
>V3RF-CABD02105570.1-trav |(17984, 18274)|2.93192000218|(0.978,0.980,0.974)|1
-MSRGEDVEQSL-FLSVQEGDSSIIKCTYTDS-----SS-TYLYWYKQEPGAGLQLLMYI
FSN---MD--MK----QDQRLTVLLNKKDKHLSLR------IA-DTQTGDSAIYFCAES-
-----
>V5RF-CABD02105579.1-trav |(4709, 5003)|2.99385601037|(1.000,1.000,0.994)|1
-GINGDSVVQTEGQVLLSEGDSLIVNCSYETT-----QY-PSLFWYVQYPGEGPQLLLKA
MKA---ND---K---GRNKGFEATYHKETTSFHLE------KD-SVQESDSAVYFCALS-
-----
>V6RF-CABD02105581.1-trav |(5845, 6138)|2.83117465195|(0.989,0.885,1.000)|1
-GSGKNQVEQSPQSLIILEGKNCTLRCNYTVS-----PF-NNLRWYKQDTGRGPVSLTIM
TFS---EN--TK----SNGRYTATLDADTKQSSLH------IT-ASQLSDSASYICVVS-
-----
>V7RF-CABD02105584.1-trav |(2822, 3110)|2.99593600205|(1.000,0.996,1.000)|1
VWSQRKEVEQDPGPFNVPEGATVAFNCTYSNS-----AS-QSFFWYRQDCRKEPKLLMSV
YSS---G---N-----EDGRFTAQLNRASQYISLL------IR-DSQLSDSATYLCAV--
-----
>V8RF-CABD02105586.1-trav |(1660, 1957)|2.92100187489|(0.983,0.961,0.979)|1
-GTRAQSVTQLDSHVSVSEGTPVLLRCNYSSS-----YS-PSLFWYVQHPNKGLQLLLKY
TSR---AT--LV---KGINGFEAEFKKSETSFHLT------KP-SAHMSDAAEYFCAVS-
-----
>V10RF-CABD02105588.1-trav |(25116, 25407)|2.98430822856|(1.000,0.998,0.987)|1
VWSQQKEVEQNSGPLSVPEGAIASLNCTYSDR-----RS-QSFFWYRQYSGKSPELIMSI
YSN---GD--K-----EDGRFTAQLNKASQYVSLL------IR-DSQPSDSATYLCAV--
-----
>V11RF-CABD02105589.1-trav |(20536, 20829)|2.90991833509|(0.988,0.936,0.997)|1
-VSRGESEGLHLPTLSVQEGDNSIINCAYSNS-----AS-DYFIWYKQESGKGPQFIIDI
RSN---MD--KR----QGQRVTVLLNKTVKHLSLQ------IA-ATQPGDSAVYFCAEN-
-----
>V12RF-CABD02105589.1-trav |(26461, 26764)|2.91549151212|(0.981,0.942,1.000)|1
-PGIAQKITQTQPGMFMQEKEAVTLDCTYDTS-----DQSYGLFWYKQPSSGEMIFLIYQ
GSY---DQ--QN---ATEGRYSLNFQKARKSANLV------IS-ASQLGDSATYFCAMRE
-----
>V13RF-CABD02105590.1-trav |(3574, 3868)|2.99899200002|(0.999,1.000,1.000)|1
-RTRGDSVTQMEGPVTLSEEAFLTINCTYTAT-----GY-PSLFWYVQYPGEGLQLLLKA
TKA---DD---K---GSNKGFEATYHKETTSFHLE------KD-SVQASDSAVYFCALS-
-----
>V14RF-CABD02105592.1-trav |(17384, 17677)|2.98442416586|(0.999,0.999,0.987)|1
VWSQQKEVEQDPGPLSVPEGAIASLNCTYSNS-----AF-QYFMWYRQYSRKGPELLMYT
YSS---GN--K-----EDGRFTVQVDKSSKYISLF------IR-DSQPSDSATYLCAMS-
-----
>V15RF-CABD02105596.1-trav |(11716, 12003)|2.99899600001|(1.000,0.999,1.000)|1
--VNSQQGEEDPQALSIQEGENATMNCSYKTS------I-NNLQWYRQNSGRGLVHLILI
RSN---ER--EK----HSGRLRVTLDTSKKSSSLL------IT-ASRAADTASYFCATD-
-----
>V16RF-CABD02105598.1-trdv |(2122, 2425)|2.95966002957|(0.991,0.985,0.984)|1
-SSMAQKVTQTQNEISVVEKEDVTLDCVYETR-----DTTYYLFWYKQPPSGELVFLVRQ
NSF---DE--QN---EISGRYSWNFQKSTSSFNFT------IT-ASQVVDSAVYFCALSE
-----
>V17RF-CABD02105602.1-trav |(5884, 6171)|2.98696000066|(0.997,0.996,0.994)|1
-LSGEDQVTQSPEALRLQEGESSSLNCSYTVS-----GL-RGLFWYRQDPGKGPEFLFTL
YSA---GE--EK----EKERLKATLTKKE--SFLH------IT-APKPEDSATYLCAVQ-
-----
>V18RF-CABD02105602.1-trav |(17805, 18104)|2.80806255635|(0.969,0.887,0.979)|1
-VSSKQEVTQIPAALSVPEGENLVLNCSFTDS-----AI-YSLQWFRQDPGKGLTSLLLI
QSS---QR--EQ----TSGRLNASLDKSSGHSTLY------IA-ASQPGDSATYLCAVRH
S----
>V20RF-CABD02105611.1-trdv |(4032, 4332)|2.90577071228|(0.983,0.965,0.961)|1
-SSVAQKVTQAQSSVSTSVRKAVTLNCLYETSQ----W-SYYIFWYKQLPSKEMIFLIRQ
GSA---EQ---N---AKSGRYSVNFKKAAKSVALT------IS-ALQLEDSAKYFCALWE
-----
>V23RF-CABD02105615.1-trav |(7807, 8097)|2.91889600501|(0.975,0.970,0.974)|1
--TIIDAKTTQPTSMDCAEGRAANLPCNHSTI-----SGNEYVYWYRQIHSQGPQYIIHG
LKN---NE--TN----EM--ASLIITEDRKSSTLI------LP-HATLRDTAVYYCIVRV
-----
>V27RF-CABD02105626.1-trdv |(13262, 13563)|2.88060549808|(0.989,0.983,0.925)|1
-SGTAQTVTQSQPEMSVQEAETVTLSCTYDTS-----ESNYYLFWYKQPPSRQMILVIRQ
EAY---KQ--QN---ATENRFSVNFQKAAKSFSLK------IS-DSQLGDTAMYFCAFM-
-----
>V28RF-CABD02105626.1-trav |(22480, 22780)|2.99496000066|(0.999,1.000,0.996)|1
-FSMAQTVTQSQPEMSVQEAETVTLSCTYDTS-----ESDYYLFWYKQPPSRQMILVIRQ
EAY---KQ--QN---ATENRFSVNFQKAAKSFSLK------IS-DSQLGDAAMYFCAYR-
-----
>V29RF-CABD02105628.1-trav |(15554, 15842)|2.98093200206|(0.992,0.993,0.996)|1
-LSGELKVGQNPLFLSTQEGKNYTIYCNYSTT-----S--DRLYWYKQDPGKSLESLFVL
LSN---GA--VK----QEGRLMASLDTKARLSSLH------IT-AAVHDLSATYFCAV--
-----
>V34RF-CABD02136332.1-ighv |(9347, 9656)|2.99899200002|(0.999,1.000,1.000)|1
-AHSQVQLVQ-SGAEVKKPGASVKVSCKASGYT-F---TSYYMHWVRQAPGQGLEWMGII
NPS--GGS--TSYAQKFQGRVTMTRDTSTSTVYME------LS-SLRSEDTAVYYCAR--
-----
>V35RF-CABD02136430.1-ighv |(38815, 39121)|2.81988260182|(0.929,0.912,1.000)|1
-VQCEVHLVQ-SGGGLVQPGGSLRLSCAGSGFT-F---SSHAMHWVRQAPGKGLEWVSAI
GT---GGG--TYYADSVKGRFTISRDNAKNSLYLQ------MN-SLRAEDMAVYYCAR--
-----
>V38RF-CABD02196554.1-igkv |(8457, 8757)|2.99699200002|(0.999,0.998,1.000)|1
-ARCDIQLTQSPTSLSASVGDRVTITCQASQGIS------NNLAWYQQKPGKVPKLLIYS
A---------SSLQSGVPSRFSGSG--SGTDFTRT------IS-SLQPEDVATYYCQRTY
NAP--
>V39RF-CABD02196563.1-igkv |(2290, 2590)|3.0|(1.000,1.000,1.000)|1
-ARCDIQMTQSPSSLSASVGDRVTITCRASQGIS------SWLAWYQQKPGKAPKLLIYA
A---------SSLESGVPSRFSGSG--SGTDFTLT------IS-SLQPEDFATYYCQQAN
SFP--
>V43RF-CABD02196586.1-igkv |(1073, 1373)|2.99798400013|(1.000,0.998,1.000)|1
-ARCDIQMTQSPSSVSASVGDRVTITCRASQGIS------NSLNWYQQKPGKAPRLLIYD
A---------SSLESGVPSRFSGSG--SGTDFTLT------IS-SLQPEDFATYYCQQFN
SYP--
>V44RF-CABD02196587.1-igkv |(1282, 1582)|2.99899200002|(0.999,1.000,1.000)|1
-ARCAIQMTQSPSSLSASVGDRVTITCRASQGIS------SYLAWYQQKPGKAPKLLIYY
A---------SSLQSGVPSRFSGSG--SGTDYTLT------IS-SLQPEDFATYYCQQHS
STP--
>V45RF-CABD02196588.1-igkv |(1835, 2135)|2.98445211916|(1.000,0.989,0.996)|1
-TTGEIVMTQSPATLSVSPGERATLSCRASQSVS------SYLAWYQQKPGQAPRLLIYG
A---------SNRATGIPARFSGSG--SGTDFTLT------IS-SLEPEDFAVYYCQQYN
NWS--
>V47RF-CABD02196595.1-igkv |(5365, 5665)|2.97795641525|(1.000,0.994,0.985)|1
-ARCAIRMTQSPSSLSASTGDRVTITCRASQGIS------SYLAWYQQKPGKAPKLLIYA
A---------STLQSGVPSRFSGSG--SGTEFTLT------IS-CLQSEDFATYYCQQYY
SYP--
>V48RF-CABD02199693.1-igkv |(2056, 2356)|2.9969280013|(0.997,1.000,1.000)|1
-ARCDIQVTQSPSSLSASVGDRVTITCRASQGIS------NELSWYQQKPGQAPTLLIYA
A---------SSLQSGVPSRFSGSG--SGTDFTLT------IS-SLQPEDIATYYCLQDY
TTP--
>V49RF-CABD02231299.1-iglv |(4157, 4463)|2.95160484445|(0.992,0.987,0.974)|1
--DSQTVVTQ-EPSFSVSPGGTVTLTCGLSSG---SVSTSYYPSWYQQTPGQAPRMLIYS
T---------NTRSSGVPDRFFGSI--IGNKAALT------IT-GAQADDESDYYCVLYM
GSGI-
>V50RF-CABD02231318.1-iglv |(3555, 3862)|2.9859000027|(0.993,0.997,0.996)|1
-SWANFMLTQ-PHSVSESPGQTVTISCTRSSG---SIA-SNYVQWYQQRPGSAPTTVIYE
D---------NQRPSGVPDRFSGSIDSSSNSASLT------IS-GLKTEDEADYYCQSYD
SS---
>V51RF-CABD02231359.1-iglv |(5556, 5865)|2.99392000218|(1.000,0.998,0.996)|1
-SWAQSVLTQ-PPSVSAAPGQKVTISCSGSSS---NIG-NNYVSWYQQLPGTAPKILIYD
N---------NKRPSGISDRFSGSK--SGTSATLG------IT-GLQTGDEADYYCGTWD
SSLSA
>V54RF-CABD02231362.1-iglv |(1583, 1892)|2.99188400513|(0.995,1.000,0.997)|1
-SWAQSVLTQ-PPSASGTPGQRVTISCSGSSS---NIG-SNTVNWYQQLPGTAPKLLIYD
N---------NKRPSGVPDRFSGSK--SGTSASLA------IS-GLRSEDEADYYCAAWD
DSLNG
>V55RF-CABD02231364.1-iglv |(18770, 19079)|2.98676801985|(0.997,0.990,1.000)|1
-SWAQSVLTQ-PPSASGTPGQRITISCSGSSS---NIG-SNTVNWYQQLPGTAPKLLIYD
N---------NKRPSGVPDRFSGSK--SGTSASLA------IS-GLQSEDEADYYCAAWD
DSLNG
>V56RF-CABD02231410.1-iglv |(1308, 1605)|2.99593600205|(1.000,0.996,1.000)|1
-SVASYELTQ-PSSVSVSPGQTARITCS---G---DVLAKNYAGWYQQKPGQAPVLVIYK
D---------SERPSGIPERFSGSS--SGTTVTLT------IS-GAQVEDEADYYCYSAA
DNN--
>V57RF-CABD02231415.1-iglv |(2745, 3048)|2.88980958526|(0.993,0.920,0.998)|1
-SEASYELTQ-PPSVSVSLGQTARITCS---G---EELPKKYAYWYQQKPGQSPVLVIYK
D---------SERPSGIPERFSGSS--SGTTVTLT------IS-GVQAEDEADYYCLSAD
SSDTY
>V60RF-CABD02231419.1-iglv |(2003, 2306)|2.95834247428|(0.996,1.000,0.966)|1
-SWAQSALTQ-PPSVSGSPGQSVTISCTGTSS---DIGGYNRASWYQQHPGKAPKLMIYE
V---------SKRPSGVSNRFSGSK--SGNTASLT------IS-GLQAEDEADYYCSSYT
SS---
>V61RF-CABD02231421.1-iglv |(1448, 1751)|2.95709938076|(0.996,1.000,0.965)|1
-SWAQSALTQ-PASVSGSPGQSITISCTGTSS---DVGGYNYVSWYQQHPGKAPKLMIYY
V---------SNRPSGVSNRFSGSK--SGNTASLT------IS-GLQAEDEADYYCSSYT
SS---
>V62RF-CABD02231422.1-iglv |(7425, 7728)|2.92296891064|(0.997,0.942,0.996)|1
-SATSYELTQ-PHSVSVATAQTARITCG---G---NNIGSKAVHWYQQKPGQDPVLVIYS
D---------SNRPSGIPERFSGSN--SGNTATLT------IS-RIEAGDEADYYCQVWD
SSSDH
>V63RF-CABD02231427.1-iglv |(14063, 14366)|2.98767605248|(0.999,0.990,0.999)|1
-SEASYELTQ-SPSVSVSPGQTARITCS---G---DALPKKYAYWYQQKPGQAPVLVIYE
D---------SKQPSGIPERFSGSS--SGTMATLT------IS-GAQVEDEADYYCYSTD
SSGNH
>V64RF-CABD02231427.1-iglv |(25067, 25377)|2.85573926526|(0.964,0.996,0.911)|1
-SWAQSALIQ-PPSASGSPGQSVTISCTGTSS---DIGGYNYVSWYQRHPGKAPKLMIYE
V---------SNRPSGVPNRFSGSK--SGNTASLT------IS-GLQAEDEADYYCCSYA
GSNN-
>V65RF-CABD02231431.1-iglv |(3583, 3879)|2.99199200002|(0.998,0.997,0.997)|1
-SVASYELTQ-PPSVSVSPGQTASITCS---G---DKLGDEYAYWYQQKPGQSPVLVIYQ
D---------SKRPSGIPERFSGSN--SGNTATLT------IS-GTQAMDEADYYCQAWD
SST--
>V67RF-CABD02352480.1-trbv |(136, 449)|2.90828299872|(0.981,0.989,0.944)|1
--PIDTEVTQTPKHLVMGMTNKKSLKCEQHMG-------HRAMYWYKQKAKKPPELMFVY
SYE---KL--SVNES-VPSRFSPECPN-NSLLNLH------LH-ALQPEDSALYLCASSQ
DTALQ
>V69RF-CABD02352482.1-trbv |(248, 545)|2.96780277491|(0.974,1.000,0.999)|1
--PVNAGVAQTPKFQVLKTGQSMTLQCAQDMN-------HNSMYWYRQDPGMGLRLIYYS
AAE---GT--TAKGE-VPDGYNVSRLN-KREFSLR------LE-SAAPSQTSVYFCASSE
-----
>V70RF-CABD02352488.1-trbv |(3197, 3494)|2.96758870068|(0.998,0.981,0.990)|1
--PVNAGVTQTPKFHVLKTGQSMTLLCAQDMN-------HEYMYWYRQDPGMGLRLIHYS
VGE---GT--TAKGE-VPDGYNVSRLK-KQNFLLG------LE-SAAPSQTSVYFCASSY
-----
>V71RF-CABD02352491.1-trbv |(2383, 2680)|2.99193200206|(0.999,0.998,0.995)|1
--PLDTAVSQTPKYLVTQMGKKESLKCEQNLG-------HNAMYWYKQDSKKFLKTMFIY
SNK---EP--ILNET-VPNRFSPDSPD-KAHLNLH------IN-SLELGDSAVYFCASSQ
-----
>V72RF-CABD02352492.1-trbv |(775, 1088)|2.90417800597|(0.994,0.998,0.929)|1
--PMEMGVTQTPRHLVMGMTNKKSLKCEQHLG-------HNAMYWYKQSAKKPLELMFVY
SLE---ER--VENNS-VPSRFSPECPN-SSHLFLH------LH-ALQPEDSALYLCASSQ
DTALQ
>V73RF-CABD02352493.1-trbv |(4882, 5179)|2.92495665333|(0.983,1.000,0.948)|1
--PVDAGVTQTPKFQVLKTGQSMTLQCAQDMN-------HNYMYWYRQDPGKGLRLIHYS
AGE---GT--TAKGE-VPDGYNVSRLN-TQNFLLR------LE-LAARSQTSVYFCATSE
-----
>V74RF-CABD02352494.1-trbv |(447, 747)|2.8626958002|(0.986,0.958,0.933)|1
--HTRAGVSQSPSNKVTEKGKDVVFRCDPISG-------HSVLYWYQQSLGQGLEFLIYF
QGN---SA--PDKSGLPSDRFSAERTG-GSVSTLT------IQ-RTQQEDSAMYLCASSL
-----
>V76RF-CABD02352499.1-trbv |(1151, 1451)|2.95282941374|(0.998,0.998,0.962)|1
--HTGAGVSQTPSNKVTEKGKDVELRCDPISG-------HTALYWYRQSLGQGPEFLIYF
QGT---GA--TDDSGLPNDRFFAVRPE-GSVSTLK------IQ-RTEQGDSAVYLCASSL
-----
>V78RF-CABD02352499.1-trbv |(8716, 9012)|2.9684040992|(0.984,0.994,0.991)|1
--PVDSGVTQTPKHLITATGQRVTLRCSPRSG-------DLSVYWYQQSLDQGLQFLIQY
YNG---EE--RAKG-NILERFSAQQFP-DSHSELN------LS-SLELGDSALYLCASSV
-----
>V81RF-CABD02352501.1-trbv |(16783, 17080)|2.92274160714|(1.000,1.000,0.938)|1
--PVNAGVTQTPKFQVLKTGQSMTLQCAQDMN-------HDYMYWYRQDPGMGLRLIHYS
VGA---GI--TDKGE-VPNGYNVSRSN-TEDFPLR------LQ-SAAPSQTSVYFCASSY
-----
>V82RF-CABD02352502.1-trbv |(788, 1088)|2.9898400105|(0.998,1.000,0.992)|1
--HTGAGVSQSPRYKVAKRGRDVALRCDSISG-------HVTLYWYRQTLGQGSEVLTYF
RSD---AQ--RDKSGRPSGRFSAERPE-RSVSTLK------IQ-RTEQGDSAVYLCASSL
-----
>V83RF-CABD02352503.1-trbv |(2597, 2893)|2.9338984707|(0.994,0.955,0.991)|1
--SVETGVTQSPTHLIKTRGQQVTLRCSPQSG-------HNTVSWYQQALGQGPQLIFQY
YRE---EE--NGRG-NFSPRFSGRQFP-NYSSELN------VN-ALELDDSALYLCASSL
-----
>V84RF-CABD02352508.1-trbv |(1078, 1374)|2.98171202074|(0.994,0.988,1.000)|1
--PVDAGVTQSPTHLIKTRGQQVTLRCSPQSG-------HNTVSWYQQALGQGPQFIFEY
YEK---EE--RGRG-NFPDRFSARQFP-NYSSELN------VN-ALLLGDSALYLCASSL
-----
>V87RF-CABD02352509.1-trbv |(10643, 10939)|2.95882119202|(0.998,0.981,0.982)|1
--LVDAGVTQSPTHLIKTRGQQVTLRCSPKSG-------HDTVSWYQQALGQGPQFIFQY
YEE---EE--RQRG-NFPDRFSGHQFP-NYSSELN------VN-ALLLGDSALYLCASSL
-----
>V88RF-CABD02352510.1-trbv |(11938, 12229)|2.890156596|(0.985,0.960,0.952)|1
----NAGVTQTPKFHILKTGQSMTLQCAQDMN-------HGYMSWYRQDPGMGLRLIYYS
AAA---GT--IDKGE-VPNGYNVSRLN-TEDFLLR------PV-SAAPSQTSVYFCASSY
-----
>V89RF-CABD02352511.1-trbv |(3159, 3459)|2.98894800078|(0.998,0.995,0.996)|1
--HTGAGVSQSPRYKVTKRGQDVTLRCDPISS-------HATLYWYQQALGQGPEFLTYF
NYE---AQ--PDKSGLPNDRFSAERPE-GSNSTLT------IQ-RTEQRDSAMYLCASSL
-----
>V91RF-CABD02352511.1-trbv |(25598, 25898)|2.99696400065|(1.000,1.000,0.997)|1
--HADTGVSQDPRHKITKRGQNVTFRCDPISE-------HNQLYWYRQTLGQGPEFLTYF
QNE---AQ--LEKSRLLSDRFSAERPK-GSFSTLE------IQ-RTEQGDSAMYLCASSL
-----
>V92RF-CABD02352512.1-trbv |(835, 1135)|2.99696400065|(1.000,1.000,0.997)|1
--HADTGVSQDPRHKITKRGQNVTFRCDPISE-------HNQLYWYRQTLGQGPEFLTYF
QNE---AQ--LEKSRLLSDRFSAERPK-GSFSTLE------IQ-RTEQGDSAMYLCASSL
-----
>V93RF-CABD02352512.1-trbv |(7390, 7687)|2.90723335954|(0.996,0.933,0.994)|1
--SVAAGVIQSPRHLIKEKRETATLKCYPIPR-------HDTVYWYQQGPGQDPQFLISF
YEK---MQ--SDKG-SIPDRFSAQQFS-DYHSELN------MS-SLELGDSALYFCASSL
-----
>V94RF-CABD02352513.1-trbv |(1353, 1650)|2.99093200206|(0.998,0.999,0.994)|1
--HMDAGITQSPRHKVTEIGTPVTLRCHQTEN-------HRYMYWYRQDPGHGLRLIHYS
YGV---KD--TDKGE-VSDGYSVSRSK-TEDFLLT------LE-SATSSQTSVYFCAISE
-----
>V95RF-CABD02352514.1-trbv |(8741, 9041)|2.92152044138|(0.991,0.951,0.986)|1
--LIEAGVVQSPRYKIIEKKQPVAFWCNPISG-------HNTLYWYRQNLGQGPELLIRY
ENE---EA--VDDSQLPKDRFSAERLK-GVDSTLK------IQ-PAELGDSAVYLCASSL
-----
>V96RF-CABD02352514.1-trbv |(14343, 14643)|2.98679201242|(0.999,0.993,0.995)|1
--HTDAGVIQSPRHEVTEMGQEVTLRCKPISG-------HNSLFWYRQTMMRGLELLIYF
NNN---VP--IDDSGMPKDRFSAKMPN-ASFSTLK------IQ-PSEPRDSAVYFCASSL
-----
>V97RF-CABD02352515.1-trbv |(2177, 2477)|2.93982541375|(0.994,0.993,0.958)|1
--HTDAGVIQSPRHEVTEMGQEVTLRCKPISG-------HNSLFWYRQTMMRGLELLIYF
NNN---VP--IDDSAMPKDRFSAKMPN-ASFSTLK------IQ-PSEPRDSAVYFCASSL
-----
>V98RF-CABD02352520.1-trbv |(3657, 3957)|2.94948631982|(1.000,0.971,0.983)|1
--HIEAGVTQFPSHSVIEKGQTVTLRCDPISG-------HDNLYWYRRVMGKEIKFLLHF
VKE---SK--QDESGMPNNRFLAERTG-GTYSTLK------VQ-PAELEDSGVYFCASSQ
-----
>V100RF-CABD02352525.1-trbv |(5450, 5746)|2.86555347861|(0.966,0.971,0.933)|1
--LSNAGVMQNPRHLVRRRGQEARLRCSPMKG-------HSHVYWYRQLPEEGLKFMVYL
QKE---NI--IDESGMPKERFSAEFPK-EGPSILR------IQ-QAVRGDSAAYFCASS-
-----
>V101RF-CABD02352526.1-trbv |(2325, 2622)|2.99699200002|(0.999,0.998,1.000)|1
--TVDGGITQSPKYLFRKEGQNVTLNCEQNLN-------HDAMYWYRQDPGQGLRLIYYS
QIV---ND--FQKGD-IAEGYSVSREK-KESFPLT------VT-SAQKNPTAFYLCASSI
-----
>V103RF-CABD02352526.1-trbv |(29242, 29542)|2.93126990764|(0.995,0.993,0.951)|1
--SFHAKVTQTPGHLVKGKGQKTKMDCTPEKG-------HTFVYWYQQNQNKEFMLLISF
QNE---QV--LQETEMHKKRFSSQCPS-NTPCSLA------IL-SSEPGDTALYLCASSQ
-----
>V104RF-CABD02352529.1-trbv |(2516, 2814)|2.87744151315|(0.991,0.988,0.919)|1
--SMDADVTQTPRNRITKTGKRIMLECSQTKG-------HDRMYWYRQDPGLGLRLIYYS
FDV---KD--INKGE-ISDGYSVSRQA-QAKFSLS------LE-SATPNQTALYFCATSD
-----
>V106RF-CABD02352531.1-trbv |(24520, 24817)|2.95204798746|(0.996,1.000,0.961)|1
--PLEAQVTQNPRYLITVTGKKLTVTCSQNMN-------HEYMSWYRQDPGLGLRQIYYS
INV---EA--IDKGD-VPEGYNVSRKE-KRNFPLI------LE-SPSPNQTSLYFCASSL
-----
>V107RF-CABD02352532.1-trbv |(6479, 6776)|2.97289600501|(0.989,0.994,0.990)|1
--LVDVKVTQSSRYLVKRMGEKVFLECVQDMD-------HENMFWYRQDPGLGLRLIYFS
SDV---KM--KEKGD-IPEGYSVSREK-KERFSLI------LE-STSTNQTSMYLCASSL
-----
>V108RF-CABD02377004.1-trbv |(3098, 3398)|2.83595312612|(0.950,0.917,0.976)|1
--SMDTKVTQRPRLLVKANEQKAKMDCVPIKR-------HSYVYWYHKTLEEELKFLIYF
QNE---EI--IQKAEIINERFSAQCPQ-NSPCTLE------IQ-STESGDTARYFCANSK
-----
>V110RF-CABD02377005.1-trbv |(21584, 21875)|2.79589600501|(0.934,0.933,0.929)|1
--LMEAEIYQTPRYHVIGTGKKITLECSQTMG-------HDKMYWSRSRNGITPHPPFLW
--V---NS--TEKGD-LSSESTVSRIR-IEHFPLT------LE-SASPSHTSQYLCASSE
-----
>V111RF-CABD02377030.1-trbv |(2304, 2607)|2.83137968596|(0.951,0.965,0.920)|1
-SVFSAVISQKPSRDICQRGTSMTIQCQVNSQ-------VTMMFWYCQQPGQSVTLIATA
NQG--SEA--TYESGFVIDKFPISCPN-LTFSTLT------VS-NRSPEDSSIYLCSVE-
-----
>V112RF-CABD02105639.1-trdv |(1838, 2144)|2.89206272671|(0.980,0.971,0.946)|-1
RGMLCDKVTQSSPDQTVASGSEVVLLCTYDTV-----YSNPDLFWYRIRPDYSFQFVFYG
DNS---GS--QA-ADFTQGRFSVKHILTQKAFHLV------IS-PVRTEDSATYYCAF--
-----
>V113RF-CABD02117385.1-ighv |(3331, 3640)|2.99798400013|(1.000,0.998,1.000)|-1
-AHSQVQLVQ-SGAEVKKPGASVKVSCKASGYT-F---TGYAMHWVRQAPGQRLEWMGWI
NTG--NGN--TKYSQKFQGRVTITRDTSASTAYME------LS-SLRSEDTAVYYCAR--
-----
>V115RF-CABD02117395.1-ighv |(10192, 10503)|2.99596800026|(1.000,0.998,0.998)|-1
-VQCEVQLVE-SGGGLVQPGRSLRLSCVASGFT-F---DDYAMHWVRQAPGKGLEWVSGI
SW--NSGS--TGYADSVKGRFTISRDNAKNSLYLQ------MN-SLRAEDTALYYCAKD-
-----
>V117RF-CABD02117398.1-ighv |(503, 809)|2.98384833171|(0.987,0.999,0.999)|-1
-VQCEVQLVE-SEGGLVQPGGSLRLSCAASGFT-F---SSYNMHWVRQAPGKGLEWVSAI
GT---GGD--TYYPGSVKGRFTISRENAKNSLYLQ------MN-SLRAEDTAVYYCAR--
-----
>V118RF-CABD02117416.1-ighv |(7584, 7893)|2.98759608|(0.999,1.000,0.989)|-1
-VQCEVQLVE-SGGGLVQPGGSLRLSCAASGFT-F---SDYYMSWVRQAPGKGLEWVSGI
NW--NGGS--TGYADSVKGRFTISRNNAKNSLYLQ------MN-SLRAEDTALYYCAR--
-----
>V119RF-CABD02117419.1-ighv |(907, 1216)|3.0|(1.000,1.000,1.000)|-1
-VQCEVQLVE-SGGGLVKPGGSLRLSCAASGFT-F---SSYWMSWVRQAPGKGLEWVSVI
SS--SGRT--TYYADSVKGRFTISRDNAKNSLYLQ------MN-SLRAEDTAVYYCAR--
-----
>V120RF-CABD02117420.1-ighv |(2703, 3012)|2.994900005|(1.000,0.995,1.000)|-1
-VQCDVQLVE-SGGGLVQPGGSLRLSCAASGFT-F---SSYGMSWVRQAPGKGLEWVSYI
SSS--SSY--IYYADSVKGRFTISRDNAKNSLYLQ------MN-SLRAEDTAVYYCAR--
-----
>V121RF-CABD02117421.1-ighv |(1503, 1818)|2.99899600001|(1.000,1.000,0.999)|-1
-AQCEVQLVE-SGGGLVKPGGSLRLSCAASGFT-F---SNYYMEWVRQAPGKGLEWVGFI
RTKAKGGT--TEYAASVKGRFTISRDDSKSIAYLQ------MN-SLKTEDTAVYYCTR--
-----
>V123RF-CABD02117431.1-ighv |(1312, 1621)|2.93755643843|(0.996,0.992,0.956)|-1
-AHSQVQLVQ-SGSEVKKPGASVKVSCKASGYT-F---TSYGMNWVRQAPGQGLEWMGWI
NTY--TGN--PTYAQGFTGRFVFSMDTSVSTAYLQ------IS-SLKAEDTAMYYCAR--
-----
>V126RF-CABD02117442.1-ighv |(1416, 1725)|2.96791252616|(0.983,0.987,0.999)|-1
-VQCQVQLVE-SAGGVVQPGRSLTLSCTASGFT-F---SSYGMHWVRQAPGKGLEWVAVI
SY--DASN--KYYAASVKGRFTISRDNSKNTLYLQ------MN-SLRAEDTAVYYCAK--
-----
>V127RF-CABD02117444.1-ighv |(7682, 7991)|3.0|(1.000,1.000,1.000)|-1
-VQCQVQLVE-SGGGVVQPGRSLRLSCTASGFT-F---SSYGMHWVRQAPGKGLEWVAVI
SY--DASN--KYYADSVKGRFTISRDNSKNTLYLQ------MN-SLRAEDTAVYYCAK--
-----
>V130RF-CABD02117457.1-ighv |(5100, 5407)|2.96928365264|(1.000,0.998,0.974)|-1
-VQCEVQLVE-SGGGLVQPEGSLKLSCAASGFT-F---SSYAMDWVRQAPGKGLEWVAHI
WN--DGSQ--KYYADSVKGRFTISRDNSKSMLYLQ------MD-SLKAEDTAMYYCT---
-----
>V133RF-CABD02117467.1-ighv |(15696, 16005)|2.99899200002|(0.999,1.000,1.000)|-1
-AHSQVQLVQ-SGAEVKKPGASVKVSCKASGYT-F---TSYYMHWVRQAPGQGLEWMGII
NPS--GGS--TSYAQKFQGRVTMTRDTSTSTVYME------LS-SLRSEDTAVYYCAR--
-----
>V134RF-CABD02117467.1-ighv |(19808, 20117)|2.95686891211|(0.996,0.968,0.996)|-1
-AYSQMQLVQ-SGAEVKKTGASVKVSCKASGYT-F---TYRSLHWVRQAPGQALEWMGWI
TPY--NGN--TNYAQKFQDRVTITRDRSMSTAYME------LS-SLRSEDTAVYYCAR--
-----
>V135RF-CABD02117471.1-ighv |(687, 996)|2.9734040992|(0.997,0.987,0.990)|-1
-VQCDVQLVQ-SGGGLVQPGGSLRLSCAASGFT-F---SSYWMHWVRQAPGKGLEWVANI
KKD--GSG--KYYVDSVKGRFTISRDNAKNSLYLQ------MN-SLRAEDTAVYYCAR--
-----
>V136RF-CABD02117473.1-ighv |(12286, 12601)|2.99899600001|(1.000,0.999,1.000)|-1
-VQCEVQLVE-SGGGLVKPGGSLRLSCTASGFT-F---GDYTMSWVRQAPGKGLEWVGFI
RSKAYGGT--TEYAASVKGRFTISRDDSKSIAYLQ------MN-SLKTEDTAVYYCTT--
-----
>V138RF-CABD02117477.1-ighv |(2704, 3013)|2.98632422844|(1.000,1.000,0.987)|-1
-VQCEVQLVE-SGGGLVQPGGSLRLSCVASGFT-F---SSYAMSWVRQAPGKGLEWVSTI
SS--TGGS--TWYPGSVKGRFTISRDNSKNTLYLQ------MN-SLRAEDTAVYYCAK--
-----
>V140RF-CABD02117482.1-ighv |(11133, 11445)|2.97840127932|(1.000,0.980,1.000)|-1
-VLSQVQLQE-SGPGLVKPSQTLSLTCTVSGGS-IS-SGSYYWSWIRQPPGKGLEWIGYI
YY---SGS--TNYNPSLKSRVTISVDTSKNQFSLK------LS-SVTAADTAVYYCAR--
-----
>V141RF-CABD02117482.1-ighv |(15935, 16229)|2.97012824764|(0.997,0.984,0.990)|-1
------QLVQ-SGPEVKKPGASVKVSCKASGYT-F---TSSAMQWVRQAPGQGLEWIGWI
IVG--SGN--TNYAQKFQGRVTITRDTSTSTAYME------LS-SLRSEDMAVYYCAA--
-----
>V142RF-CABD02117487.1-ighv |(1480, 1789)|3.0|(1.000,1.000,1.000)|-1
-VQCEVQLVE-SGGGLVQPGGSLRLSCAASGFT-F---SSYHMSWVRQAPGKGLEWVSVI
YS--DGSS--TYYAASVKGRFTISRDNSKNTLYLQ------MN-SLRAEDTAVYYCAR--
-----
>V143RF-CABD02117492.1-ighv |(7493, 7808)|2.98385201038|(0.993,0.999,0.992)|-1
-VQCEVQLVE-SGGGLVQPGGSLRLSCAASGFT-F---SNYYKSWVCQAPGKGLEWVRFI
RNKANGGT--TEYTTSVKGRFTISRDDSKSITYLQ------MN-SLKTEDTAVYYCSR--
-----
>V144RF-CABD02117494.1-ighv |(3416, 3731)|3.0|(1.000,1.000,1.000)|-1
-VQCEVQLLE-SGGGLVQPGGSLRLSCAASGFT-F---SDHYMDWVRQAPGKGLEWVGRI
RNKANSYT--TEYAASVKGRFTISRDDSKNSLYLQ------MN-SLKTEDTAVYYCTT--
-----
>V145RF-CABD02117499.1-ighv |(3042, 3351)|3.0|(1.000,1.000,1.000)|-1
-VQCEVQLLE-SGGGLVQPGGSLRLSCAASGFT-F---SSYWMHWVRQAPGKGLEWVSRI
NS--DGSS--TSYADSVKGRFTISRDNAKNTLYLQ------MN-SLRAEDTAVYYCAR--
-----
>V146RF-CABD02117506.1-ighv |(3288, 3597)|2.84787137132|(0.977,0.951,0.931)|-1
-TYSQVQLVQ-SGHEVKQPGASVKVSCKASGYS-F---TSYGMNWVRQAPGQGLEWMGWF
NTY--TGN--PTYAQGFTGRFVFSMDTSVSTAYLQ------IS-SLKAEDTAMYYCAR--
-----
>V147RF-CABD02117545.1-ighv |(2488, 2803)|2.78298089753|(0.928,0.900,0.963)|-1
-VQCEVQLVE-SGGGLVQPGGSLRLSCAASGFT-F---SDHYRSWVRQAQGKGLELVGLI
RNKANSYT--TEYAASGKGRFTISRGDSKNTLYLQ------MS-SLKTEDLAVYYCAR--
-----
>V148RF-CABD02117766.1-ighv |(420, 729)|2.97976801985|(0.990,0.997,0.993)|-1
-AHSQVQLVQ-SGAEVKKPGASVKVSCKASGYT-F---TDYYMHWVRQAPGQGLEWMGRI
NPN--SGG--TNYTQKFQGRVTMTRDTSISTAYME------LS-RLRSEDTATYYCAR--
-----
>V149RF-CABD02117767.1-ighv |(2221, 2530)|2.96737780343|(0.978,0.994,0.998)|-1
-AHSQVQLVQ-SGAEVKKPGASVKVSCKASGYT-F---TGYYMHWVRQAPGQGLEWMGWI
NPN--SGG--TNYAQKFQGRVTMTRDTSISTAYME------LS-RLRSEDTATYYCTR--
-----
>V150RF-CABD02136430.1-ighv |(23813, 24119)|2.81988260182|(0.929,0.912,1.000)|-1
-VQCEVHLVQ-SGGGLVQPGGSLRLSCAGSGFT-F---SSHAMHWVRQAPGKGLEWVSAI
GT---GGG--TYYADSVKGRFTISRDNAKNSLYLQ------MN-SLRAEDMAVYYCAR--
-----
>V151RF-CABD02136430.1-ighv |(37941, 38248)|2.99899600001|(1.000,1.000,0.999)|-1
-AQCEVQLVE-SGGGLVQPGGSLRLSCAASGFT-F---SNHYTSWVLQAPGKGLEWVSYI
SGD--SDY--TNYADSVKGRFTISRDNAKNSLYLR------MN-SLRAEDTAVYYCV---
-----
>V153RF-CABD02196513.1-igkv |(3814, 4114)|2.99296000066|(0.999,0.998,0.996)|-1
-AKCDIQMTQSPSTLSASVGDRVTITCRASQGIS------KLLAWYQQKPGKAPKLLIYA
A---------SSLESGVPSRFSGSG--SGTEFTLT------IS-SLQPDDFATYYCQQHS
STP--
>V154RF-CABD02196515.1-igkv |(8253, 8553)|2.94762728311|(0.999,0.956,1.000)|-1
-ARCDIRMTQSPSSLSASVGDRVTITCRASQGIR------NDLGWYQQKPGKAPKILIYA
A---------SSLQSGVPSRFSGSG--SGTDFTLT------IS-SLQPEDFATYYCLQDY
NYP--
>V156RF-CABD02196521.1-igkv |(5557, 5857)|2.99899600001|(1.000,1.000,0.999)|-1
-ARCDIQMTQSPSSLSASVGDRVTITCRASQGIS------KWLAWYQQKPGKAPKRLIYA
A---------SSLESGVPSRFSGSG--SGTEFTLT------IS-SLQPEDFATYYCLQYN
SYP--
>V157RF-CABD02196542.1-igkv |(3007, 3305)|2.74573147928|(0.993,0.842,0.998)|-1
-SRGEIVLTQSPDFQSVTPKEKVTITCRASQSIG------SSLHWYQQKPDQSPKLLIKY
A---------SQSISGVPSRFSGSG--SGTDFTLT------IN-SLEAEDAATYYCQQSS
SL---
>V159RF-CABD02196547.1-igkv |(2239, 2541)|2.96394028297|(0.996,0.984,0.985)|-1
-SSGDVVMTQSPLSLPVTLGQPASISCRSSQSLVYS-DGNTYLNWFQQKPGQSPRRLIYK
V---------SNRDSGVPDRFSGSG--SGTDFTLE------IS-RVEAEDVGVYYCMQG-
-----
>V160RF-CABD02196553.1-igkv |(790, 1090)|2.99698000014|(1.000,0.998,0.999)|-1
-ARCDIQLTQSPTSLSASVGDRVTITCQASQGIS------NNLAWYQQKPGKVPKLLIYS
A---------SSLQSGVPSRFSGSG--SGTDFTLT------IS-SLQPEDVATYYCQRTY
NAP--
>V161RF-CABD02196556.1-igkv |(192, 492)|2.994900005|(1.000,1.000,0.995)|-1
-ARCDIQMTQSPSSLSASVGDRVTITCRASQSVS------NYLSWYQQKPGKAPKLLIYA
A---------SSLQSGVPSRFSGSG--SGTDFTLT------IS-SLQPEDFATYYCQHGY
GTP--
>V163RF-CABD02196901.1-igkv |(2814, 3114)|2.98632422844|(1.000,0.987,1.000)|-1
-DRCDIQMTQSPSSLSASVGGRVTITCRASQGIS------NNLNWYQQKPGKTPKLLIYA
A---------SSLQSGIPSRFSDSG--SGTDYTLT------IS-SLQPEDFAAYYCQQSD
STP--
>V166RF-CABD02337338.1-trgv |(1057, 1370)|2.97722818506|(0.999,0.992,0.987)|-1
-SQKSSNLEGRTKSVTRQTGSSAEITCDLTVT-----NT-FYIHWYLHQEGKAPQRLLYY
DVS---TARDVLESGLSSGKYYTHTP-RRWSWILR------LQ-NLIENDSGVYYCATWD
-----
>V168RF-CABD02337341.1-trgv |(2313, 2626)|2.93142849428|(0.993,0.961,0.982)|-1
-SQKSSNLEGRTKSVIRQTGSSAEITCDLDGG-----ST-GYIHWYLHQEGKAPQRLQYY
DSY---NSKVVLESGVSPGKYYTYTST-RKNLRLI------LR-NLIENDSGVYYCATWD
-----
>V169RF-CABD02379427.1-igkv |(3027, 3327)|3.0|(1.000,1.000,1.000)|-1
-ARCDIQMTQSPSSLSASVGGRVTITCRASQGIS------NNLNWYQQKPGKTPKLLIYA
A---------SSLQSGIPSRFSDSG--SGTDYTLT------IS-SLQPEDFAAYYCQQSD
STP--
>V170RF-CABD02379503.1-igkv |(6201, 6501)|2.99393200206|(0.999,0.995,1.000)|-1
-ARCDIQMTQSPSSLSASVGGRVTITCRASQDIS------NNLNWYQQKPGKTPKLLIYA
A---------SSLQSGIPSRFSDSG--SGTDYTLT------IS-SLQPEDFAAYYCQQSD
STP--
>V0RF-AQIB01018214.1-trgv |(163723, 164036)|2.96886891211|(1.000,1.000,0.972)|1
-SQKSSNLEGRTKSVTRPTGSSAEITCDLPEV-----SS-FYIHWYLHQEGKAPQRLLYY
DTS---NSRVVLESGISSGKYDSYGST-RRNLRLI------LR-NLIENDSGVYYCANWD
-----
>V1RF-AQIB01018215.1-trgv |(1470, 1783)|2.93056728515|(0.995,0.991,0.952)|1
-SQKSSNLEGRTKSVTRPTGSSAEITCDFSGD-----SN-FYIHWYLHQEGKAPQRLLYY
DVS---NSRDVLESGLSPGKYYTHTR-KRWSWILI------LR-NLIENDSGVYYCANWN
-----
>V2RF-AQIB01018217.1-trgv |(6282, 6595)|2.93748729347|(0.994,1.000,0.951)|1
-SQKSSNLEGRTKSVTRPTGSSAEITCDLPEV-----SS-FYIHWYLHQEGKAPQRLLYY
DSS---NSRVVLESGISSGKYNSYEST-RRSLRLR------LQ-NLIENDSGVYYCANWD
-----
>V3RF-AQIB01144236.1-igkv |(33225, 33525)|2.99598000014|(0.999,1.000,0.997)|1
-ARCDIQMTQSPSSLSASVGDRVTITCRASQGIN------KELSWYQQKPGKAPTLLIYA
A---------SSLQTGVPSRFSGSG--SGTDFTLA------IS-SLQPEDVATYYCLQDY
TTP--
>V4RF-AQIB01144236.1-igkv |(99005, 99323)|2.76463305256|(0.995,0.911,0.913)|1
-SSGDIVMTQTPLSLPVTPGEPASISCRSSQSLLDSDDGNTYLDWYLQKPGQSPQLLIYE
V---------SNRASGVPDRFSGSG--SDTDFTLK------IS-RVEAEDVGVYYCMQTI
EYP--
>V9RF-AQIB01144240.1-igkv |(12918, 13233)|2.9415734465|(0.997,0.961,0.989)|1
-TSGDIVMTQTPFSLPVNPGEPASISCRSSQSLSDS-DGYTYLYWYLQKPGQSPQLLIYL
G---------SNRASGVPDRFSGSG--SGTDFTLK------IS-RVEAEDVGVYYCMQGI
QLP--
>V11RF-AQIB01144242.1-igkv |(18230, 18530)|2.98096052424|(1.000,0.984,0.998)|1
-ARCDIQMTQSPSSLSASVGDRVTITCQGSQSLS------NFLNWYQQKPGKIPKLLIYR
A---------SSLQSGIPSRFSGSG--SGTDYTLT------IS-SLQPEDFATYYCQQGY
SYP--
>V12RF-AQIB01144242.1-igkv |(33676, 33991)|2.72243751013|(1.000,0.834,0.993)|1
-TSGDIVMTQTPLSLPVTPGEPASISCRSSQSLLHS-NGYTYLDWYVQKPGQSPQLLIYL
V---------SSRASGVPDRFSGSG--SGTDFTLK------IS-RVEAEDVGVYYCMQGT
QLP--
>V14RF-AQIB01144243.1-igkv |(18759, 19059)|2.99899600001|(1.000,0.999,1.000)|1
-ARCDIQMTQSPSSLSASVGDRVTITCQASQGIT------NDLAWYQQKPGETPKLLIYE
A---------SSLQSGIPSRFSGSG--SGTDFTLT------IS-SLQPEDFATYYCQHYY
STP--
>V15RF-AQIB01144243.1-igkv |(52384, 52684)|2.99796800026|(0.998,1.000,1.000)|1
-ARCDIQMTQSPSSLSASVGDRVTISCRASQNIY------SNLAWYQQKPGKTPKLLIYA
A---------SSLQSGIPSRFSGSG--SGTDFTLT------IS-SLQPEDYATYYCQHHY
GTP--
>V18RF-AQIB01144251.1-igkv |(6848, 7148)|2.96274467291|(0.992,0.997,0.975)|1
-ARCDIQMTQSPSSLSASVGDRVTITCHASQGIS------NWLAWYQQKPGKAPKLLIYY
A---------SNLETGVPSRFSGSR--SGTDFTVT------IS-SLQPEDIATYYCQQYD
NFP--
>V19RF-AQIB01144257.1-igkv |(11968, 12268)|2.95381238217|(0.995,1.000,0.963)|1
-ARCDIQMTQSPSSLSASVGDRVTITCRASQGIN------NYLSWYQQKPGKAPKPLIYY
A---------SSLETGVPSRFSGSG--SGPDYTLT------IS-SLQPEDIATYYCQQYD
NFP--
>V27RF-AQIB01144264.1-igkv |(45678, 45976)|2.88450961098|(0.999,0.914,1.000)|1
-SKGEIVLTQSPAFRSVTLKEKVTITCQASQSIG------SSLHWYQQKPDQSPKLLIKY
A---------SQSISGVPSRFSGSG--SGTDFTLT------IN-SLEAEDAATYYCQQSS
SF---
>V28RF-AQIB01144264.1-igkv |(72133, 72421)|2.95282941374|(0.998,0.962,0.998)|1
-----IVLTQSPATLSLSPGETATLSCRASQSVG------SSLAWYQQKPGQVPRLLIYG
A---------SSRATGIPDRFSGSG--SGTEFTLT------IS-SLQPEDFAVYYCQKYS
SSP--
>V31RF-AQIB01144265.1-igkv |(9151, 9443)|2.8824976111|(0.998,0.913,1.000)|1
-SRGDIVMTQSPAFVSVTPGEKVTITCQASEGIS------NYLHWYQQKPDQAPKLLIQY
A---------SQSISGVPSRFTGSG--SGTDFTFT------IS-SLEVEDAATYYCQQGN
-----
>V32RF-AQIB01144265.1-igkv |(25389, 25680)|2.94700655222|(0.997,0.987,0.967)|1
----DIQMTQSPSSLSASVGDRVTITCQASQSFS------SSLAWYQQKPGKAPKLLIYA
A---------SSLQSGVPSRFSGSK--AGTDFTLT------IS-SLQPEDVATYYCQQYY
STP--
>V33RF-AQIB01144265.1-igkv |(40570, 40862)|2.99799600001|(0.999,1.000,0.999)|1
-AKCDIQMTQSPSSLSASVGDRVTITCRASQTIS------SYLAWYQQKPGKVPKLLIYA
A---------SSLESGIPSRFSGSG--SGTEFTLT------IS-SLQPEDFATYYCQQHN
-----
>V34RF-AQIB01144265.1-igkv |(60992, 61284)|2.97470402421|(0.991,0.986,0.998)|1
-ARCDIQMTQSPSSLSASVGDRVTVTCRASQGIS------NYLSWYQQEPGKAPKLLIYA
A---------SSLESGVPSRFSGSG--SGTEFTLT------IS-SLQPEDFATYYCLQHN
-----
>V35RF-AQIB01144265.1-igkv |(75665, 75964)|2.99899600001|(1.000,1.000,0.999)|1
-TTGEIVMTQSPATLSLSPGERATLSCRASQSVS------SYLAWYQQKPGQAPRLLIYG
A---------SSRATGIPDRFSGSG--SGTEFTLT------IS-SLEPEDVGVYYCQQYN
NWN--
>V36RF-AQIB01144265.1-igkv |(84906, 85206)|2.98867205249|(0.999,1.000,0.990)|1
-ARCDIQMTQSPSSLSASVGDRVTITCRASQGIS------NYLNWYQQKPGKAPKLLIYS
A---------SRLQSGVPSRFSGSG--SGTEFTLT------IS-SLQPEDFATYYCEQFK
NYL--
>V38RF-AQIB01144269.1-igkv |(40447, 40747)|2.99385601037|(1.000,1.000,0.994)|1
-ARCDIQLTQSPSSLSASVGDRVTITCRASQGIS------SYLAWYQQKPGKAPKLLIYD
A---------SNLQSGVPSRFSGSG--SGTEFTLT------IS-SLQPEDFATYYCQQRN
SLP--
>V39RF-AQIB01144273.1-igkv |(1759, 2059)|2.99799200002|(1.000,0.999,0.999)|1
-ARCDIQMTQSPSSLSVSVGDRVTITCRASQGIS------NYLSWYQQKPGKAPKLLIYS
A---------SSLESGVPSRFSGSG--SGTDYTLT------IS-SLQPEDFAAYYCLQYQ
SIP--
>V41RF-AQIB01144273.1-igkv |(55407, 55707)|2.95410367172|(0.992,0.999,0.966)|1
-ARCDIQMTQSPSSLSASVGDRVTITCRASQGIS------NALAWYQQKPGKVPKLLIYA
A---------SSLQSGLPSGFSGSG--SGTEFTLT------IS-SLQPEDFATYYCQQGY
STP--
>V42RF-AQIB01144273.1-igkv |(67090, 67390)|3.0|(1.000,1.000,1.000)|1
-ARCDIQMTQSPSSLSASVGDRVTITCRASQGIS------NNLAWYQQKPGKAPKLLIYD
A---------TTLQSGVPSRFSGSG--SGTEFTLT------IS-SLQPEDFATYYCQQYN
SYP--
>V43RF-AQIB01144273.1-igkv |(86428, 86728)|2.71676090883|(0.957,0.928,0.867)|1
-TTGEIVMTQSPATLSLSPGETATLSCKTSQSVG------SKLAWYQQKPGQAPRLLIYG
A---------SSRATGIPARFSGSG--SGTDFTLA------IS-SLEPEDVGAYYCQETS
SLS--
>V44RF-AQIB01144274.1-igkv |(43133, 43433)|2.82905544896|(0.964,0.921,0.952)|1
-ARCDIQMTQSPSSLSASVGDTVTITCPASQGIS------SYLNWYQHKPGKAPKLLIYY
A---------TTLQSGVPSRFSGSG--SGTEFTLT------IS-SLQPEDFAAYYCQQYK
SLP--
>V45RF-AQIB01144274.1-igkv |(49577, 49877)|2.997|(0.999,0.999,0.999)|1
-ARCDIQMTQSPSSLSASVGDKVTITCHASQGIS------SWLAWYQQKPGKAPKLLIYK
A---------SSLQSGVPSRFSGSG--SGTDFTLT------IS-SLQPEDFATYYCQQIT
SAP--
>V47RF-AQIB01144276.1-igkv |(25002, 25302)|2.96532422844|(0.993,0.980,0.993)|1
-ARRDIQMSQSPSSLSASVGDRVTITCHASQGIS------SWLAWYQQKPGKAPKLLIYK
A---------SSLQSGVPSRFSGSG--SGTDFTLT------IS-SLQPEDFATYYCLQYD
SNP--
>V49RF-AQIB01144276.1-igkv |(40183, 40483)|2.99174403277|(1.000,1.000,0.992)|1
-ARCDIQMTQSPSSLSASVGDRVTITCQASQGIS------NYLAWYQQKPGKAPKLLIYY
A---------STLQSGVPSRFSGSG--SGTEFTLT------IS-SLQPEDFATYYCQQHN
SNP--
>V50RF-AQIB01144276.1-igkv |(56521, 56821)|3.0|(1.000,1.000,1.000)|1
-ARCDIQMTQSPSSLSASVGDRVTITCQASQGIS------NYLAWYQQKPGKAPKPLIYK
A---------STLESGVPSRFSGSG--SGTEFTLT------IS-SLQPEDFATYYCQQRN
SYP--
>V52RF-AQIB01144282.1-igkv |(46328, 46640)|2.94836106127|(0.992,0.985,0.973)|1
-CNGDIVLTQSPASLAVSPGQKATITCRASESVSLF--GINFIHWYQQKPGQPPKLLIYQ
A---------SNKDTGVPARFSGSG--SGTDFTLT------IN-PVEADDAANYYCLQSK
TSP--
>V53RF-AQIB01144282.1-igkv |(64268, 64559)|2.94507598606|(0.994,0.959,0.997)|1
-----IVLTQSPTSMAVSQGERVTISCTASSSIS-----TSYLHWYQQKPGFPPRLLVYT
T---------SSLASGVPARFSGSG--SGTSYTLT------IS-SMEAEDAANYYCQQGS
SIP--
>V55RF-AQIB01146122.1-iglv |(12217, 12527)|2.92099830469|(0.976,0.950,1.000)|1
-SWAEVVFTQ-PHSVSGSPGQTVTISCTRSSG---SID-SSFVYWYQQRPGSAPTTVIYN
D---------NRRPSGVPDRFSGSIDSSSNSASLT------IS-GLKSEDEADYYCQSDD
SSG--
>V56RF-AQIB01146122.1-iglv |(69507, 69814)|2.99899600001|(1.000,1.000,0.999)|1
-SWAQSVLTQ-PPSVSGAPGQRVTISCTGSSS---NI-GGYNVHWYQQLPGTTPKLLIYG
N---------NQRPSGVSDRFSGSK--SGTSASLT------IT-GLQSEDEADYYCQSYD
SSLS-
>V58RF-AQIB01146122.1-iglv |(97013, 97322)|2.99080001921|(0.999,0.992,1.000)|1
-CWAQSVLTQ-PPSASGAPGQSVTISCSGSSS---NIG-SNSVYWYQQFPGTAPKLLIYY
S---------NQRPSGVPDRFSGSK--SGTSASLT------IS-GLQSEDEADYYCAAWD
DSLSG
>V61RF-AQIB01146122.1-iglv |(131665, 131974)|2.98972803289|(1.000,0.998,0.992)|1
-SWAQSVLTQ-PPSASGAPGQSVTISCSGSSS---NIG-SNYVSWYQQLSGKAPKLLIYK
N---------SQRPSGVPDRFSGSK--SGTSASLT------IS-GLRSEDEADYYCAAWD
DSLNG
>V62RF-AQIB01146122.1-iglv |(149998, 150308)|2.93889226661|(0.992,0.985,0.965)|1
-SLSQPVLTQ-PASLSASPGASARLSCTLSSG---INVGSYSIYWYQQKPGSPPRYLLYY
YSD---SS--KGQGSGVPSRFSGSKDASANAGLLL------IS-GLQSEDEADYYCAI--
-----
>V63RF-AQIB01146122.1-iglv |(159131, 159440)|2.99289600501|(0.999,1.000,0.994)|1
-SWAQSVLTQ-PPSVSGAPGQRVTISCTGSSS---NIG-GYYVQWYQQLSGTAPKLLIYG
N---------NQRPSGVSDRFSGSK--SGTSASLT------IT-GLQSEDEADYYCETWD
NSLNG
>V64RF-AQIB01146122.1-iglv |(164963, 165270)|2.86616198126|(0.921,0.999,0.988)|1
-SWAQSVLTQ-PPSVSGAPGQRVTISCTGSSS---NI-GGYDVHWYQQLPGTTPKLLIYD
N---------NKRPSGVSDRFSGSK--SGTSASLT------IT-GLQTEDEADYFCQSYD
SSLG-
>V65RF-AQIB01146122.1-iglv |(187790, 188100)|2.80771714775|(0.993,0.952,0.902)|1
-SLSQPVLTQ-PASLSASPGASASLTCTFSGG---INVAGYYIYWYQQKPGSPPRYLLWY
KSD---SD--KHQGSGVPSRFSGSKDASANTGILR------IS-GLQSEDEADYYCAI--
-----
>V66RF-AQIB01146123.1-iglv |(2181, 2490)|2.93504987297|(0.987,0.965,0.985)|1
-SWAQSVLTQ-PRSASEATRKSITISCSGSSS---NIG-SNYVSWYQQLPGTAPKLLIYY
N---------DWRASGVSDRFSGSK--SGTSASLA------IS-GLQTEDEADYYCAAWD
DSLSG
>V68RF-AQIB01146133.1-iglv |(25439, 25742)|2.99275601537|(0.994,1.000,0.999)|1
-SWAQSALTQ-SPSVSGSPGQSVTISCTGTSS---DVGGYNYVSWYQQHPGKAPKLMIYE
V---------SKRPSGVSDRFSGSK--SGNTASLT------IS-GLQAEDEADYYCCSYT
TS---
>V72RF-AQIB01146136.1-iglv |(1665, 1968)|2.99280401921|(1.000,0.993,1.000)|1
-SWAQSAPTQ-PRSVSGSPGQSVTISCTGTSS---DIGGYNYVSWYQQHPGTAPKLMIYG
V---------SNRPSGVSDRFSGSK--SGNTASLT------IS-GLQAEDEADYYCCSYT
TS---
>V73RF-AQIB01146137.1-iglv |(9886, 10183)|2.9128099056|(0.967,0.959,0.989)|1
-SVASYELTQ-PPSVSVSPGQTARITCS---G---DVLKENYADWYQQKPGQAPVLLIYE
D---------SKRPSGIPERFSGST--SGDTTTLT------IS-STLSEDGADYYCFSGD
ENN--
>V75RF-AQIB01146137.1-iglv |(25864, 26167)|2.97874003277|(0.996,0.995,0.988)|1
-SVVSSELTQ-DPAVSVALGQTVRITCQ---G---DSLRSSYASWYQQKPGQAPVLVVYG
N---------NNRPSGIPERFSGSS--SGNTASLT------IT-GAQVEDEADYYCNSWD
SSGNH
>V76RF-AQIB01146138.1-iglv |(15714, 16017)|2.9530935653|(0.976,0.982,0.997)|1
-SWAQAALTQ-PPSVSKSLGQSVTISCTGTSS---DIAAYNDVSWYQQHPGTAPRLLIYS
V---------SNRPSGVSDCFSGSK--SGNTASLT------IS-GLQAEDEADYYCCSYR
SG---
>V78RF-AQIB01146140.1-iglv |(2757, 3067)|2.88017772754|(0.999,0.912,0.999)|1
-SWAQAALTQ-PHSVSGSPGQSVTISCTGTSS---DIGGYNRVSWYQQHPGKAPKLMIYE
V---------SNRPSGVSDRFSGSK--SGNTASLT------IS-GLQAEDEADYYCSSYA
SSSN-
>V79RF-AQIB01146140.1-iglv |(26014, 26324)|2.98376801985|(0.996,0.999,0.989)|1
-SWAQAALTQ-PPSVSGSPGQSVTISCTGTSS---DVGGYNYVSWYQQHPGKAPKLMIYE
V---------NKRPSGVSDRFSGSK--SGNTASLT------IS-GLQAEDEADYYCSSYA
GSNT-
>V82RF-AQIB01146141.1-iglv |(13491, 13794)|2.99383600705|(0.995,0.999,1.000)|1
-SWAQAAPTQ-SPSVSGSAGQSVTISCTGTSS---DIGGYNRVSWYQQHPGKAPKLMIYE
V---------SKRPSGVSDRFSGSK--SGNTASLT------IS-GLQAEDEADYYCSSYA
GS---
>V83RF-AQIB01146141.1-iglv |(50602, 50912)|2.76786491212|(0.914,0.915,0.942)|1
-SWAQSAPIQ-SPSVSGSLGQSVTISCTGTSS---DIGRYNYVSWYRQQPGTTTKLTMYN
V---------NTRPSGVSDRFSGSK--SGNTASLT------IS-GLQAEDEADYYCSSYE
TSDT-
>V84RF-AQIB01153480.1-ighv |(7301, 7610)|2.8734581712|(0.996,0.943,0.953)|1
-VLSQLQLQE-SGPGLVKPSETLSLTCAVSGGS-I---SSYWWGWIRQAPGKGLEWIGNI
YGS--GGS--TEYNPSLKSRVTISKDTSKNQFSLK------LS-SVTAADTAVYYCAR--
-----
>V85RF-AQIB01153481.1-ighv |(29869, 30184)|2.99498000014|(0.998,0.997,1.000)|1
-VQCEVQLVE-SGGGLIQPGGSLRLSCAASGFT-F---SDYAMSWVRQASGKGLEWVGYI
RSKSNNYA--TEYAASVKGRFTISRDDSKNTLYLQ------MS-GLKTEDTAVYYCTI--
-----
>V86RF-AQIB01153482.1-ighv |(4668, 4983)|3.0|(1.000,1.000,1.000)|1
-VQCEVQLVE-SGGGLVQPGGSLRLSCAASGFT-F---SDHYMQWVRQAPGKGLEWVGFI
RSKAYGGT--AEYAASVKGRFTISRDDSKSITSLQ------MN-SLKTEDTAVYYCTR--
-----
>V87RF-AQIB01153482.1-ighv |(18678, 18987)|3.0|(1.000,1.000,1.000)|1
-VQCEVQLVE-SGGGLVQPGGSLKLSCAASGFT-F---GDYAMSWVRQAPGKGLEWVSSI
SN--TGKT--TYYADSVKGRFTISRDNAKNSLSLQ------MN-SLRAEDTAVYYCAR--
-----
>V92RF-AQIB01153486.1-ighv |(413, 728)|2.99088400513|(0.998,0.993,1.000)|1
-VQCEVQLVE-SGGGLVQPGGSLRLSCAASGFT-F---SDYAMHWVRQAPGKGPEWVGFI
RSKAYGGT--AEYAASVKGRFTISRDDSKNTAYLQ------MN-SLKTEDTAVYYCTI--
-----
>V97RF-AQIB01153492.1-ighv |(6792, 7104)|2.96315937872|(0.999,1.000,0.968)|1
-VLSQVQLQE-SGPGLVKPSETLSLTCAVSGGS-I---SSSYWSWIRQSPGKGLEWIGDI
YGSS-GGS--TSYNPSLKSRVTMSVDTSKNQFSLK------LS-SVTAADTAVYYCAR--
-----
>V99RF-AQIB01153501.1-ighv |(4567, 4876)|2.994900005|(1.000,0.995,1.000)|1
-VQCEVQLVE-SGGGLVQPGASLRLSCAASGFT-F---GDYAMSWVRQAPGKGLEWVSYI
SSA--SST--IYYADSVKGRFTISRDNAKNSLYLQ------MN-SLKTEDTAVYYCTR--
-----
>V100RF-AQIB01153501.1-ighv |(18760, 19071)|2.83016746762|(0.951,0.910,0.979)|1
-VQCEVQLVE-SGGGVVQPEGSLRLSCAASRFT-F---DDYAMSWVRQAPGKGLEWVSVI
SW--TRRS--TYYADSVKGRFTISRDNTKNSLYLQ------MD-RLRAEDTALYYCAKD-
-----
>V104RF-AQIB01153507.1-ighv |(24714, 25023)|3.0|(1.000,1.000,1.000)|1
-VQCEVQLVE-SGGGLVQPGGSLRLSCAASGFT-F---SSYWMHWVRQAPGKGLEWVSLI
NS--DGGS--TRYADSVKGRFTISSENAKNSLYLQ------MN-SLRAEDTAVYYCAR--
-----
>V105RF-AQIB01153507.1-ighv |(32453, 32768)|2.9899000027|(0.997,0.993,1.000)|1
-VQCEVQLVQ-SGGGLVQPGGSLRLSCAASGFT-F---SEYAMAWVRQASGKGLEWVGRI
RSKSNNYG--TAYAASVKGSFTISRDDSKNTLYLQ------MS-SLKTEDTAVYYCTR--
-----
>V106RF-AQIB01153507.1-ighv |(42168, 42483)|2.80469116247|(0.986,1.000,0.871)|1
-VQCEVQLVE-SGGGLVQPGGSLKLSCAASGFT-F---SNYYMDWVRQAPGKGLEWVGRI
RNKANSHT--TEYAASVKDRFTISRDDSKNTLYLQ------MS-GLKTEDKAVYYCAR--
-----
>V107RF-AQIB01153509.1-ighv |(6082, 6394)|2.98993600205|(0.998,0.994,0.998)|1
-VQCEVQLVE-SGAGLVQPGGSLRLSCAASGFT-F---SDYYMDWVRQAPGKGLEWVSRI
SSG-SGSS--TYYPDSVKGRFTISRDNSKNTLYLQ------MN-SLRAEDTAVYYCAR--
-----
>V108RF-AQIB01153509.1-ighv |(13578, 13893)|2.81368799163|(0.985,0.876,1.000)|1
-VQCEVQLVE-SGGGLVQPGGSLRLSCAASGFT-F---SNHYMHWVRQAPGKGQEWVGFI
RNKANGGT--AEYAASVKGRFTISRDDSKSITSLQ------MN-SLKTEDTAVYYCTR--
-----
>V109RF-AQIB01153509.1-ighv |(29997, 30306)|2.99494800078|(1.000,0.997,0.998)|1
-VQCEVQLVE-SGGGLVQPGGSLRLSCAASGFT-F---GDYDMSWVRQAPGKGLEWVSFI
SY--TGKT--TYYADSVKGRFTISRDNAKNSLSLQ------MN-SLRAEDTAVYYCTR--
-----
>V111RF-AQIB01153509.1-ighv |(45356, 45665)|2.8000005966|(0.992,0.917,0.929)|1
-AHSEVQLVQ-SGAEVKKPGASVNVSCKASGYT-F---TDYYLHWVRQAPGKGLEWMGRI
DPE--NGE--SKYAQKFQDRLTMTADTSTDTAYME------LS-SLRSEDTAVYYCAT--
-----
>V112RF-AQIB01153511.1-ighv |(7980, 8295)|2.99298400013|(0.997,0.997,0.999)|1
-VQCEVQLVE-SGRGLVQPGGSLRLSCAVSGFT-F---SDHYMSWVREAPGKGLEWVGFM
RNKANGGR--TEYAASVKGRFTISRDDSKSIASLQ------MS-SLKTEDTAVYYCAR--
-----
>V113RF-AQIB01153511.1-ighv |(11094, 11404)|2.98772803289|(0.998,1.000,0.990)|1
-VQCEVQLVE-SGGGLVQPGGSLRLSCVASGFT-F---SDHYMDWVRQAPGKGLEWVSSI
STG-SGST--TLYPDSVKGRFTISRDNAKNTLYLQ------MN-SLRADDTAVYYCA---
-----
>V114RF-AQIB01153511.1-ighv |(40798, 41107)|2.99698000014|(0.998,1.000,0.999)|1
-VQCEVQLVE-SGGGLAKPGGSLRLSCAASGFT-F---SSYGMHWVRQAPGKGLEWISAI
NS--GGSN--TWYTDSVKGRFTISRDNSKNTLSLQ------MN-SLRAEDTAVYYCAK--
-----
>V116RF-AQIB01153517.1-ighv |(601, 913)|2.91970612475|(0.994,0.964,0.968)|1
-VLSQVQLQQ-WGGGLVKPSETLSLTCAVYGGS-IS--GYYYWSWIRQPPGKGLEWIGNI
DGN--SGS--TNYNPSLKSRVTISKDTSKNQFSLK------LS-SVTAADTAVYYCAR--
-----
>V118RF-AQIB01153537.1-ighv |(1707, 2018)|2.95810798542|(0.999,1.000,0.964)|1
-VQCEVQLVE-SGGGVVQPGGSLRLSCAASGFT-F---DDYGMHWVRQAPGKGLEWVSDI
SW--DGDS--TYYADSVKGRFTISRDDAKNSLYLQ------MD-SLRAEDTALYYCAKD-
-----
>V119RF-AQIB01153538.1-ighv |(4311, 4620)|2.9773601679|(0.998,0.994,0.986)|1
-AQSQVQLVQ-SGAEVKKPGASVKLSCKASGYT-F---TSYNINWVRQAPGQVLEWMGWI
NPS--NGN--TGYAQKFQGRVTMTRDTSTSTAYME------LS-SLISEDTAVYYCAR--
-----
>V123RF-AQIB01153541.1-ighv |(23910, 24219)|2.84755919449|(0.936,0.930,0.996)|1
-AHSEMQLVQ-SEAEVKKPGASVKVSCKVSGYT-F---TYPYLHWVRQTPGQGLEWMGWI
TPY--NGN--TNYAQKFQDRVTITRDRSMSTAYME------LS-SLRSEDTAVYYCAR--
-----
>V124RF-AQIB01153543.1-ighv |(7057, 7368)|2.994900005|(1.000,1.000,0.995)|1
-VQCEVQLVE-SGGGVVQPGGSLRLSCAASGFT-F---DDYAMGWVRQAPGKGLEWVSGI
SW--NSGS--TGYADSVKGRFTISRDNAKNSLYLQ------MN-RLRAEDTALYYCAKD-
-----
>V126RF-AQIB01153553.1-ighv |(7961, 8270)|2.96886891211|(1.000,0.972,1.000)|1
-VQGEVQLVE-SGGGLAKPGGSLRLSCSASGFT-F---SDYYMHWVRQASGKGLEWVSRI
NT--GGGS--TWYADSVKGRFTISRENAKNTLYLQ------MD-SLRAEDTAVYYCAR--
-----
>V127RF-AQIB01153553.1-ighv |(15671, 15986)|2.87365800141|(0.986,0.988,0.918)|1
-VKCEAQLME-SGGGLVQPGGSLRLSCAASGFT-F---SDHYMQWVRQAPGKGLEWVGLI
RNKVDGET--TDYAASVKGRVTISRDESKSITYLQ------MN-NLKTEDTAVYYCAR--
-----
>V128RF-AQIB01153553.1-ighv |(22330, 22639)|2.79662300417|(0.997,0.866,1.000)|1
-VQGEVQLVE-SGGGLVQPGGSLRLSCAASGFT-F---SSYAMHWARQAPGKGLEWVSYI
SSG--GGN--TYYADSVKGRFTISRDNSKNTLSLQ------MN-SLRAEDTAVYYCAR--
-----
>V130RF-AQIB01153555.1-ighv |(23903, 24218)|2.99166002957|(0.993,0.999,1.000)|1
-VQCEVQLVE-SGGGLVQPGGSLRLSCAASGFT-F---SDHYMDWVRQAPGKGLKWVGRI
RNKANSYT--TEYAASVKGRFTISRDDSKNTLYLQ------MS-SLKTEDTAVYYCTR--
-----
>V133RF-AQIB01153557.1-ighv |(2988, 3297)|2.99799200002|(1.000,0.999,0.999)|1
-VQCEVQLVE-SGGGLVQPGGSLRLSCAASGFT-F---SDYWMYWVRQAPGKGLEWVSRI
S-G-SSSS--TYYPDSVKGRFTISRDNAKNTLYLQ------MD-SLRAEDTAVYYCAR--
-----
>V134RF-AQIB01153557.1-ighv |(15135, 15441)|2.9731803079|(0.997,0.983,0.994)|1
-VQCEVQLVE-SGGGLVQPGGTLRLSCAASGFT-F---GNSDLIWIRQAPGKGLEWVSYI
SS---GGS--TYYSDSVKGRFTISRENAKNTLYLQ------MS-SLRVEDTAVYYCVR--
-----
>V135RF-AQIB01153558.1-ighv |(4802, 5117)|2.99498400013|(0.999,0.999,0.997)|1
-VQCEVQLVE-SGGGLVQPGGSLRLSCAASGFT-F---SNSWMSWVRQAPGKGLEWVARI
KSKADGGT--AEYAASVKGRFTISRDDSKNTLYLQ------MN-SLKTEDTAVYYCTI--
-----
>V139RF-AQIB01153566.1-ighv |(30566, 30881)|2.99275601537|(0.994,1.000,0.999)|1
-VQCEVQLVE-SGGGLVQPGGTLRLSCAASGFT-F---SNYWMDWVRQAPGKGLEWVGFI
KNKADGGT--AEYAASVKGRFTISRDDSKNTLYLQ------MN-SLKTEDTAVYYCTR--
-----
>V140RF-AQIB01156901.1-igkv |(3348, 3648)|2.99899600001|(1.000,0.999,1.000)|1
-AKCDIQMTQSPSSLSASVGDKVTITCQASQSIS------SWLAWYQQKPGKAPKLLIYK
A---------SSLESGVPSRFSGSG--SGTDFTLT------IS-SLQPEDFATYYCQQHN
SAP--
>V141RF-AQIB01158310.1-igkv |(1186, 1501)|2.78005197352|(0.985,0.895,0.940)|1
-TSGDIVMTQTPLSLPVTPGEPASISCRSSQSLLHS-NGYTYLNWYLQKPGQSPLLLIYL
V---------SNRASGVPDRFSGSG--SGTDFTLK------IS-RVEAEDVGVYYCMQDI
KLP--
>V144RF-AQIB01162311.1-trbv |(11768, 12065)|2.94919216959|(0.990,0.981,0.979)|1
--SLDTAVSQTPKYLVTQMGKKVSLKCEQNLG-------HDTMYWYKQDSKKLLKIMFSY
NNK---EL--TINET-VSTRFSPESPD-KAHLILH------IK-SLELGDSAVYFCASSQ
-----
>V145RF-AQIB01162312.1-trbv |(4219, 4516)|2.89590279134|(0.982,0.971,0.948)|1
--PTDTGVTQTPKHLVMGMTNKKSLKCEQHLG-------HNAMYWYKQKAKKPPELMFVY
QYE---KL--SINES-VPSRFSPECSK-SSLLYLH------LQ-ALQPEDSALYLCASSQ
-----
>V148RF-AQIB01162312.1-trbv |(22989, 23286)|2.94682735083|(0.996,0.971,0.983)|1
--PTDTGVTQTPKHLVMGMTNKKSLKCEQHLG-------HNAMYWYKQKAKKPPELMFVY
NYE---KL--SINES-VPSRFSPECSK-SSLLYLH------LR-ALQPEDSALYLCASSQ
-----
>V150RF-AQIB01162312.1-trbv |(41443, 41740)|2.98230822856|(0.998,0.985,1.000)|1
--PANADVTQSPKFQILKTGQNMTLKCAQDMN-------HNSMYWYRQDPGMGLRLIHYS
ATE---DT--TDTGE-VPDGYSVSRLN-KKEFLLR------LE-SAAPSQTSVYFCASSE
-----
>V151RF-AQIB01162312.1-trbv |(55583, 55896)|2.95842016586|(0.990,0.991,0.978)|1
--SLDTAVSQTPKYLVTQTGKNESLKCEQNLG-------HNAMYWYKQDSKKLLKIMFIY
SNK---EP--VLNET-VPNRFSPKSPD-KAHLNLY------IT-SVELGDSAVYFCASSQ
DTALQ
>V152RF-AQIB01162312.1-trbv |(59013, 59310)|2.88900028092|(0.956,0.965,0.969)|1
--PMETGVTQTPRHLVMGMTNKKSLKCEQHLG-------HNAMYWYKQKAKKPPELMFIY
NFK---ER--AENNS-VPSRFSPECPD-SSLLYLH------LR-ALQPEDSALYLCASSQ
-----
>V153RF-AQIB01162312.1-trbv |(70730, 71027)|2.94541305243|(0.974,0.993,0.980)|1
--PVNAGVTQTPKFQILKTGQNMTLKCAQDMN-------HDRMYWYRQDTGMGLRLIHYS
VGE---GN--TEKGE-VPSGYNASRLN-KKDFLLR------LE-LAAPSQTSIYFCASSE
-----
>V154RF-AQIB01162312.1-trbv |(74325, 74625)|2.61353971076|(0.892,0.859,0.869)|1
--HTDAGVSQSPRNKVTEEGKDVVLRCDPISG-------HIALYWYRQSLGKGLEFLIFF
QGN---DA--PDKSGLPSGRFSAERLE-GSVSTLK------IQ-RTQQGDSAVYLCASSS
-----
>V155RF-AQIB01162313.1-trbv |(10114, 10411)|2.9425766041|(0.990,0.974,0.980)|1
--HTGAGVSQSPSNKVTE-KGNVALRCDPISG-------HAVLYWYRQNLGQGLEFLIYF
QGT---SA--VDDSGLRSDRFSATRPE-GSVSTLK------IQ-RTEQGDSATYFCASSL
-----
>V157RF-AQIB01162313.1-trbv |(17798, 18094)|2.77609737519|(0.980,0.946,0.888)|1
--SVDSGVTQTPKHLITAIGQQVTLRCSPRSG-------DLSVYWYQQSLGQGLQFLIQY
YNG---AE--RAKG-NILERFSAQQFP-DLHSELN------LS-SLELGDSALYFCASSL
-----
>V161RF-AQIB01162317.1-trbv |(23070, 23367)|2.97288223716|(0.999,1.000,0.976)|1
--PVNAGVTQTPKFQVLKTGQSMTLQCAQDMN-------HDCMYWYRQDPGMGLRLIHYS
FGK---GS--TDKGE-VPDGYNVTRSS-TEDFTLR------LE-SAAPSQTSVYFCASSY
-----
>V163RF-AQIB01162317.1-trbv |(35256, 35552)|2.8615913698|(0.973,0.946,0.948)|1
--PVQAGVTQSPTHLIKTRGQQVTLRCSPISG-------HSSVYWYQQALGQGLQFILSY
DEE---EE--RDRG-TFPHRFSGHQFP-NYSSELN------VN-ASEVGDSALYLCASSL
-----
>V164RF-AQIB01162317.1-trbv |(46598, 46898)|2.96340127932|(0.995,0.975,0.995)|1
--HTGAGVSQSPSYKVTKRGQDVALRCDPISG-------HVALYWYRRTLGQGPELLTYF
QND---AQ--PDKSGLPSDRFSAERPE-GSVSTLK------IQ-RTQQGDSAVYLCASSL
-----
>V165RF-AQIB01162318.1-trbv |(2955, 3251)|2.9899000027|(0.999,0.995,0.996)|1
----NAGVTQTPKFQVLKTGQSMTVQCAQDMN-------HDYMFWYRQDPGMGLRLIHYS
GAA---GT--TDKGE-VPSGYNVSRLN-TEDFPLR------LE-SAAPSQTSVYFCASSY
ST---
>V172RF-AQIB01162320.1-trbv |(3376, 3672)|2.91860420047|(1.000,0.989,0.943)|1
--PVDTGVTQSPTHLIKMRGQQVTLRCSPISG-------HSSVYWYQQALGQGPQFIFQY
YEK---EE--RGRG-NFPDRFSGHQFP-NYSSELN------VS-ALLLGDSALYLCASSL
-----
>V173RF-AQIB01162320.1-trbv |(10674, 10965)|2.87675831648|(0.987,0.999,0.913)|1
----NAGVTQTPKFQVLKTGQSMIVQCAQNMN-------HDYMFWYRQDPGMGLRLIYYS
VTA---GI--TTKGE-VPNGYNVSRRN-TEDFLLR------LE-SAALSQTSVYFCASSY
-----
>V174RF-AQIB01162320.1-trbv |(14920, 15220)|2.97235210496|(0.991,1.000,0.982)|1
--HTGAGVSQSPRYKVIKKGQDVALRCDPISG-------HAALYWYQQALGQGPEFLTYF
NYK---DQ--PDKSGLPNNRFSAERPE-GSFSTLT------IQ-RTEQQDSAVYLCASSL
-----
>V176RF-AQIB01162320.1-trbv |(46876, 47173)|2.93574467291|(0.983,0.988,0.966)|1
--HMDARITQSPRHKITETGTPVTLRCHQTEN-------HRYMYWYRQDLGHGLRLIHYS
YGV---ED--TDKVE-VSDGYSVSRSK-TEDFLLT------LE-SATRSQTSVYLCASSE
-----
>V184RF-AQIB01162321.1-trbv |(2362, 2659)|2.94639750637|(0.992,1.000,0.959)|1
--TVDGGITQSPKYLFRKEGQNVTLSCEQNLN-------HDAMYWYRQDPGQGLRLIYYS
QTV---ND--IQKGD-TAEGYSVSRER-KQSFPLT------VT-SAQRNPTAFYLCASSI
-----
>V185RF-AQIB01162321.1-trbv |(20388, 20688)|2.82670560779|(0.969,0.907,0.966)|1
--STDTKVTQRPRLLVKANEQKAKMDCVPVKG-------HSYVYWYRKKLDEELKFLIYF
QNE---EI--IQKAEIINERFSAQCPQ-NSPCTLE------IQ-STESGDAALYFCASSK
-----
>V186RF-AQIB01162321.1-trbv |(29352, 29657)|2.89472588623|(0.988,0.979,0.938)|1
--SFHAEVTQTPGYLVKGKGQKTKMDCTPEKG-------HTFVYWYQQNQNKEFTFLISF
QNE---QV--LQETELHKKRFSSQCPK-NPPCSLE------IP-SSEPGDTALYLCASSQ
ST---
>V187RF-AQIB01162321.1-trbv |(41537, 41835)|2.82769746084|(0.975,0.985,0.894)|1
--SMDADVTQTPRNKIAKTGKRIMLECSQTKS-------HDRMYWYRQDPGLGLRLIYYS
FDV---KD--INKGE-ISDGYNVSRQE-QAKFSLS------LE-SATPNQTALYFCATSD
-----
>V188RF-AQIB01162321.1-trbv |(50021, 50318)|2.96668883957|(0.996,0.978,0.994)|1
--LMEADIYQNPRHCVIGTGKKITLECSQTMG-------HDKMYWYQQDPGMELHLIHYS
YGV---NS--TERGD-FSSESTVSRIR-IEHFPLT------LE-SASPSHTSQYLCASSE
-----
>V189RF-AQIB01162321.1-trbv |(81250, 81547)|2.94110611876|(0.982,1.000,0.962)|1
--PLEAQVTQNPRYLITVTGKKLTVTCSQNMN-------HEYMSWYRQDPGLGLRQIYYS
INV---EM--VDKGD-IPEGYIVSRKE-KRNFLLI------LE-SPSPSQTSLYFCASSL
-----
>V190RF-AQIB01162321.1-trbv |(86583, 86890)|2.92660565256|(0.968,0.997,0.965)|1
--LVDVKVTQSSRYLIKRTGEKVFLECVQDMD-------HERMFWYRQDPGLGLRLIYFS
YDV---KL--NEKGD-IPEGYNVSREK-KERFSLI------LG-FASTNQTSMYLCASSL
STA--
>V191RF-AQIB01162321.1-trbv |(106451, 106754)|2.98232022844|(0.999,0.986,0.998)|1
-SVFSAVVSQKPSRDVCQRGTSVTIQCQVDSQ-------VTMMFWYRQQPGQSMTLIATA
NQG--SEA--TYESGFVIDKFPISRPN-LTFSTLT------VS-NTSPEDSSIYLCSVE-
-----
>V194RF-AQIB01128636.1-trav |(12150, 12438)|2.91070318412|(0.995,0.935,0.995)|-1
-LSGELKVGQNPLFLSTQEGKNDTIYCNYSTA-----S--DRLYWYRQDPGKSLESLFVL
LSN---GA--VK----QEGRFMASLDTKARLSTLH------IT-AALQDLSATYFCAV--
-----
>V197RF-AQIB01128637.1-trdv |(70372, 70673)|2.51475205331|(0.966,0.769,0.929)|-1
-SGMAQTVTQSQPEMSVREAETVTLSCTYDTS-----ESDYYLFWYQQPPSRQMTLIIRQ
EAY---KQ--QN---ATENRFSVNFQKAAKSFSLK------IS-DSQLGDAAMYFCAFM-
-----
>V198RF-AQIB01128637.1-trav |(79553, 79853)|2.87742849428|(0.975,0.964,0.943)|-1
-SGMAQTVTQSQPEMSVREAETVTLSCTYDTS-----ESYYYLFWYKQPPSRQMTLIIRQ
EAY---KQ--QN---ATENRFSVNFQKAAKSFSLK------IS-DSQLGDAARYFCAYR-
-----
>V205RF-AQIB01128642.1-trav |(7440, 7727)|2.94701938908|(0.996,0.990,0.965)|-1
-LSGEDQVTQSPEALSLQEGESSSLNCSYTVS-----GL-RGLFWYRQDPGKGPEFLFSL
YSA---GE--EK----EKERLKATLTKKE--SFLH------IT-GPKPEDSATYLCAVQ-
-----
>V207RF-AQIB01128643.1-trav |(8686, 8977)|2.94061205453|(0.982,0.973,0.986)|-1
-RTNGDSVTQTEGPVTLPERAALTLNCTYQTS-----YS-AFIFWYVQYPKKEPELLLKS
S-E---NQ---E---TNSRGFQASHVKSDSSFHLE------KP-SVQLSDSAVYYCVLR-
-----
>V208RF-AQIB01128643.1-trav |(11902, 12205)|2.91965257659|(0.976,0.985,0.960)|-1
-SSMAQKVTQAQTEISVVEKEDVTLDCVYETR-----ETTYYLFWYKQPPSGELVFLIRQ
NSF---NE--QN---EINGRYSSNFQKSTSSFNLT------IT-ASQVMDSAVYFCALNE
-----
>V211RF-AQIB01128644.1-trav |(158071, 158361)|2.97288400513|(0.992,0.987,0.994)|-1
-MSRGDDVEQSL-FLSVREGDISVINCTYTDS-----SS-TYLYWYKQEPGAGLQLLIYI
LSN---TD--LK----QDQRLTVLLNKKDKHLSLR------IA-DTQTGDSAIYFCAES-
-----
>V213RF-AQIB01128644.1-trav |(203408, 203702)|2.98532022844|(1.000,0.999,0.987)|-1
-GINGDSVVQTEGQVLLSEGNSLIVNCSYEST-----QY-PSLFWYVQYPGEGPQLLLKA
MKD---ND---K---ESNKGFEATYRKETTSFHLE------KD-SVQESDSAVYFCALS-
-----
>V214RF-AQIB01128644.1-trav |(216592, 216885)|2.90215937872|(0.958,0.959,0.989)|-1
-GSGKNQVEQSPQSLIILEGKNCTLQCNYTVS-----PF-SNLRWYKQDTGKGLISLTIM
TFS---DN--TK----SNGRYTATLDADTKQSSLY------IT-AAQLSDSASYICVVS-
-----
>V215RF-AQIB01128644.1-trav |(232171, 232464)|2.98410040488|(1.000,0.985,1.000)|-1
VWGQQKEVEQNPGPLSVPEGATASLNCTYSNS-----AF-QYFMWYRQYSRKGPQLLIYI
YSS---GN--K-----EDGRFTAQVDKSSKYISLF------IR-DSQPSDSATYFCAMS-
-----
>V217RF-AQIB01128644.1-trav |(243150, 243447)|2.97536527997|(1.000,0.997,0.980)|-1
-TARAQSVTQPDIHITVSEGASLELRCNYSYG-----AT-PSLFWYVQSPGQGLQLLLKY
FSG---DT--LV---QGIKGFEAEFKRSQYSFNLR------KP-SVHWSDAAEYFCAAG-
-----
>V218RF-AQIB01128644.1-trav |(257060, 257353)|2.99393200206|(0.999,1.000,0.995)|-1
-VSRGESVGLHLPTVSVQEGDNSVINCTYSDS-----AS-DYFLWYKQESGKGPQSIIDI
RSN---MA--KR----QGQRLTVLLNKTMKHLSLQ------IA-ATEPGDSAVYFCAEN-
-----
>V219RF-AQIB01128644.1-trav |(262905, 263206)|2.97428822908|(0.997,0.994,0.984)|-1
-SGIAQKITQTQPAMFVQEKEAVTLDCTYDTS-----DQSYGLFWYKQPSSGEMIFLIRQ
ESY---DK--QN---ATEGRYSLNFQKARKSVNLV------IS-ASQVEDSAMYFCAMR-
-----
>V220RF-AQIB01128644.1-trav |(280831, 281125)|2.98521630725|(1.000,1.000,0.986)|-1
-RTRGDSVTQMEGPVTLSERAFLTINCTYTAT-----GY-PSLFWYVQYPGEGPQLLLKA
VKT---DE---K---GSNKGFEATYRKETTSFHLK------KD-SVQESDSAVYFCALS-
-----
>V221RF-AQIB01128644.1-trav |(305369, 305662)|3.0|(1.000,1.000,1.000)|-1
VWSQQKEVEQNPGPLSVPEGATASLNCTYSNS-----AF-QYFMWYRQYSRKGPQLLIYI
YSS---GN--K-----EDGRFTAQVDKSSKYISLF------IR-DSQPSDSATYFCAMS-
-----
>V222RF-AQIB01128644.1-trav |(340098, 340385)|2.994900005|(1.000,1.000,0.995)|-1
--VNSQQGEEDPQTLSIQEGENATMNCSYKTS------I-NNLQWYRQDSGRSLVQLTLI
RSN---ER--QK----NSGRLRVTLDTSKKSSSLL------IT-ASRAADTASYFCATD-
-----
>V224RF-AQIB01144282.1-igkv |(55648, 55948)|2.93746941923|(0.964,0.983,0.996)|-1
-TTGQVILTQSPATLSLSPGERATLSCRASQSVS------SYLAWYQQKPGQAPRLLIYS
A---------SSRATGIPDRFSGSG--SGTEFTLT------IS-SLEPEDVGVYHCYQYY
SGY--
>V227RF-AQIB01145361.1-ighv |(1895, 2208)|2.79297859347|(0.971,0.889,0.960)|-1
-VQCEVQLVE-SGGGLVQPGRFLRLSCAASGFT-F---SNCYMHWAHQAQGRGLEWVSLM
RKKANSYA--TEYAVSVKDRFTISRDDSKNTLYLQ------MN-SLKTEDTAVYYCA---
-----
>V228RF-AQIB01145362.1-ighv |(14904, 15217)|2.79297859347|(0.971,0.889,0.960)|-1
-VQCEVQLVE-SGGGLVQPGRFLRLSCAASGFT-F---SNCYMHWAHQAQGRGLEWVSLM
RKKANSYA--TEYAVSVKDRFTISRDDSKNTLYLQ------MN-SLKTEDTAVYYCA---
-----
>V230RF-AQIB01153518.1-ighv |(54, 366)|2.89465312015|(0.935,0.989,0.998)|-1
-VLSQVQLQE-SGPGLLKPSETLSLTCAVSGGS-IS-D-SYRWSWIRQPPGKGLEWIGNI
YGN--SAS--TNYNPSLKSRVTISKDTSKNQFSLK------LS-SVTAADTAVYYCAR--
-----
>V231RF-AQIB01158235.1-ighv |(4748, 5060)|2.989900005|(0.995,0.995,1.000)|-1
-VQCEVQLVE-SGGGLVQPGGSLRLSCVASGFT-F---SDHYMHWVRQALGKGLEWVSRI
SSG-SGSS--TYYADSVKGRFTISRDNAKNTLYLQ------MN-SLRAEDTAVYYCAR--
-----
>V1RF-JYKQ01003191.1-trgv |(1259, 1575)|2.93110646705|(0.995,0.974,0.967)|1
-SQKSSNLEGRTKSVTRPTGSSAEITCDLPEV-----SS-FYIHWYLHQEGKAPQRLLYY
DSS---NSRVVLESGISSGKYDSYGSTRRRNLRLR------LQ-NLIENDSGVYYCANWD
-----
>V2RF-JYKQ01003191.1-trgv |(5603, 5916)|2.94542595418|(0.999,0.971,0.980)|1
-GQKSSNLEGITKSVTRPTGSSAEITCDFSGD-----SN-FYIHWYLHQEGKVPQRLLYY
DVS---NSRDVLESGLSPGKYYTHTR-TRWSWILI------LR-NLIENDSGVYYCANWD
-----
>V3RF-JYKQ01005758.1-ighv |(2900, 3215)|2.84571523784|(0.980,0.905,0.983)|1
-VKCEAQLME-SGGGLVQPGGSLRLSCAASGFT-F---SSYGMSWVHQTPGKGLEWVGLI
RNKADGET--TDYAASVKGRVTISRDDSKSITSLQ------MN-NLKTEDTAVYYCAR--
-----
>V6RF-JYKQ01005770.1-ighv |(7257, 7566)|2.99067605248|(1.000,0.991,1.000)|1
-VQCEVQLVE-SGGGLVQPGRSLRLSCATSGFT-F---SNYWMFWVRQAPGKGLEWVSSI
S-G-SSSS--TYYPDSVKGRFTISRDNAKNMLYLQ------MN-SLRAEDTAVYYCAR--
-----
>V14RF-JYKQ01005774.1-ighv |(31522, 31837)|2.99899200002|(0.999,1.000,1.000)|1
-VQCEVQLVE-SGGGLVQPGGSLRLSCAASGFT-F---SNYWMNWVRQAPGKGLEWVGFI
KNKADGGT--AAYAESVKGRFTISRDDSKNTLYLQ------MN-SLKTEDTAVYYCTR--
-----
>V15RF-JYKQ01005777.1-ighv |(21925, 22238)|2.91823309455|(0.970,0.989,0.961)|1
-VQCEVQLVE-SRGGLVQPGGSLRLSCAASGFT-F---SDYYMHWVRQAQGKGLEWVGLI
RNKANSYT--TEYAAAVKGRFTISRDDSKNTLYLQ------MS-SLKTEDTALYYCT---
-----
>V17RF-JYKQ01005784.1-ighv |(1524, 1833)|2.98967205249|(1.000,0.991,0.999)|1
-VQCEVQLVE-SGGGLIQPGGSLRLSCAASGFT-F---SSYYMYWIRQAPGKGLEWVSAI
NT--GGGS--TWYADSVKGRFTISRENAKNTLYLQ------MN-SLRAEDTAVYYCAK--
-----
>V18RF-JYKQ01005787.1-ighv |(1654, 1969)|2.99199600001|(0.997,0.998,0.997)|1
-VQCEVQLVE-SGGGLVQPGGSLRLSCAASGFT-F---SDHYMDWVRQAPGKGPEWVGFI
RNKARGGT--AEYAASVKGRFTISRDDSKNVTYLQ------MS-SLKTEDTAVYYCTT--
-----
>V21RF-JYKQ01005789.1-ighv |(14344, 14653)|3.0|(1.000,1.000,1.000)|1
-VQCEVQLVE-SGGGLVQPGGSLRLSCAASGFT-F---SSYGMHWARQAPGKGLEWVSAI
NN--GGGS--TWYADSVKGRFTISRENAKNTLYLQ------MN-SLRAEDTAVYYCAK--
-----
>V24RF-JYKQ01029805.1-trbv |(7011, 7308)|2.77628667923|(0.914,0.919,0.948)|1
--PIDTGITQTPKHLVMGMTNKKSLKCEQHMG-------HRAVYWYKQKAKKPPEIMFMY
NYE---TL--SINES-VPSRFSPECSK-SSLLYLH------LR-ALQPEDSALYLCASSQ
-----
>V28RF-JYKQ01029807.1-trbv |(28941, 29238)|2.89590279134|(0.982,0.971,0.948)|1
--PTDTGVTQTPKHLVMGMTNKKSLKCEQHLG-------HNAMYWYKQKAKKPPELMFVY
QYE---KL--SINES-VPSRFSPECSK-SSLLYLH------LQ-ALQPEDSALYLCASSQ
-----
>V30RF-JYKQ01029809.1-trbv |(772, 1069)|2.97596034001|(0.985,0.993,0.999)|1
--PANADVTQSPKFQILKTGQSMTLQCAQDMN-------HNSMYWYQQDPGMGLRLIHYS
ATE---DT--TDPGE-VPDGYSVSRLN-KKEFLLK------LE-SAAPSQTSVYFCASSE
-----
>V31RF-JYKQ01029809.1-trbv |(15370, 15683)|2.74572487637|(0.989,0.967,0.858)|1
--SLDTAVSQTPKYLVTQTGKNESLKCEQNLG-------HDTMYWYKQDSKKLLKIMFSY
NNK---EP--ILNET-VPNRFSPKSPD-KAHLNLH------IK-SVELGDSAVYFCASSQ
DIALQ
>V33RF-JYKQ01029809.1-trbv |(33264, 33561)|2.97567605248|(0.995,0.995,0.986)|1
--PVNAGVTQTPKFQILKTGQNMTLKCAQDMN-------HNYMYWYRQDPGMGLRLIHYS
AGE---GS--TEKGE-VPDGYNASRLN-PQNFLLR------LE-SAAPSQTSMYFCASSE
-----
>V34RF-JYKQ01029809.1-trbv |(37007, 37307)|2.98696000066|(0.995,0.994,0.998)|1
--HTGAGVSQSPRNKVTEEGKDVVLRCDPISG-------HTALYWYRQSLGKGLEFLIYF
QGN---DA--PDKSGLPSGRFSAERTE-GSVSTLK------IQ-RTEQGDSAVYLCASSL
-----
>V35RF-JYKQ01029811.1-trbv |(568, 868)|2.93593600205|(0.980,0.976,0.980)|1
--HTGAGVSQFPSNKVTEKGKDVALRCDPISG-------HAVLYWYRQNLGQGLEFLIYF
QGT---GA--VDDSGLRSDRFSATRPE-GSVSTLK------IR-HTEQGDSATYFCASSL
-----
>V37RF-JYKQ01029811.1-trbv |(8288, 8584)|2.9138704721|(0.985,0.946,0.989)|1
--SVDSGVTQTPKHLITAIGQQVTLRCSPRSG-------DLSVYWYQQSLGQGLQFLVQY
YNG---EE--REKG-NILERFSAQQFP-DLHSELN------LS-SLELGDSALYFCASSL
-----
>V38RF-JYKQ01041707.1-ighv |(10254, 10563)|2.79588394224|(0.971,0.922,0.922)|1
-AHSQVQLVQ-SGPEVKQPGASVKVSCKASGYS-F---TTYGMNWVRQAPGQGLEWMGWM
NTY--TGN--PTYAQGFTERFVFSMDTSVSTVYLQ------IS-SLKAEDTAMYYCAR--
-----
>V39RF-JYKQ01041713.1-ighv |(30683, 30998)|2.99799600001|(0.999,1.000,0.999)|1
-VQCEVQLVE-SGGGLVQPGGSLRLSCAASGFT-F---SSSAMHWVRQASGKGLEWVGYI
RSKSNNYA--TQYAASVKGRFTISRDDSKNTLYLQ------MS-SLKTEDTAMYYCTT--
-----
>V41RF-JYKQ01041713.1-ighv |(51469, 51784)|2.99798400013|(1.000,1.000,0.998)|1
-VQCEVQLVE-SGGGLVQPGGSLRLSCAASGFT-F---SDHYMQWVRQAPGKGLEWVGFI
RSKAYGGT--AEYAASVKGRFTISRDDSKSIASLQ------MS-SLKTEDTAVYYCAR--
-----
>V43RF-JYKQ01041713.1-ighv |(71051, 71357)|3.0|(1.000,1.000,1.000)|1
-VQCEVQLVE-SGGGLVQPGGSLRLSCAASGFT-F---SSYGMNWVRQAPGKGLEWVSYI
SS---GGS--TYYADSVKGRFTISRDNSKNTLSLQ------MN-SLRAEDTAVYYCAG--
-----
>V45RF-JYKQ01041718.1-ighv |(11509, 11818)|2.80448511445|(0.997,0.870,1.000)|1
-VQGEVQLVE-SRGGLAKPGGSLRLSCAASGFT-F---SGYNMYWVRQASGKGLEWVSGI
SY--TGGS--TWYADSVKGRFTISRENAKNTLYLQ------MN-SLRAEDTAVYYCAR--
-----
>V46RF-JYKQ01041718.1-ighv |(32027, 32336)|2.99799200002|(1.000,0.999,0.999)|1
-VQCEVQLVE-SGGGLVKPGASLRLSCAASGFT-F---GDYTMHWVRQAPGKGLEWVSYI
SS--ASSY--IHYADSVKGRFTISRDNAKNSLYLQ------MN-SLKTEDTAVYYCTR--
-----
>V48RF-JYKQ01051981.1-igkv |(559, 859)|2.99699200002|(0.999,1.000,0.998)|1
-ARCDIQMTQSPSSLSASVGDRVTITCQASQGIS------SWLAWYQQKPGKAPKLLLYK
A---------SGLQSGVPSRFSGSG--SGTEFTLT------IS-SLQPEDFATYYCQQFS
SAL--
>V50RF-JYKQ01051984.1-igkv |(27105, 27405)|2.90163035638|(0.984,0.936,0.991)|1
-ARCDIQMNQSPSSLSASVGDTVTITCRANQGIS------NNLAWYQQKPGKVPQLLIYY
A---------SSLASGIPSRFSGSG--SGTEFTLT------IS-SLQPEDFAAYYCLQHN
SYP--
>V53RF-JYKQ01052451.1-igkv |(143240, 143558)|2.91892981862|(0.992,0.956,0.977)|1
-SSGDIVMTQTPLSLPVTPGEPASISCRSSQSLLDSEDGNTYLDWYLQKPGQSPQLLIYE
V---------SNRASGVPDRFSGSG--SDTDFTLK------IS-RVEAEDVGVYYCMQAL
QNP--
>V55RF-JYKQ01054925.1-trav |(5041, 5338)|2.64615296524|(0.965,0.802,0.981)|1
-GLRAQLVTQPEDQVTVAEGNPLTVKCTYSVS-----GN-PYLFWYVQYPNQGLQFLLKY
ITG---DN--LV---KGSYGFEAEFNKSQTSFHLK------KP-SALVSDSALYFCAVR-
-----
>V56RF-JYKQ01054933.1-trav |(11630, 11920)|2.9898400105|(0.994,1.000,0.996)|1
-MSRGEDVEQSL-FLSVREGDISVINCTYTDS-----SS-TYLYWYKQEPGAGLQLLIYI
LSN---MD--LK----RDQRVTVLLNKKDKHLSLR------IA-DTQTEDSAIYFCAES-
-----
>V57RF-JYKQ01054940.1-trav |(18103, 18397)|2.98532022844|(1.000,0.999,0.987)|1
-GINGDSVVQTEGQVLLSEGNSLIVNCSYEST-----QY-PSLFWYVQYPGEGPQLLLKA
MKD---ND---K---ESNKGFEATYRKETTSFHLE------KD-SVQESDSAVYFCALS-
-----
>V58RF-JYKQ01054940.1-trav |(31345, 31638)|2.97502906788|(0.982,0.995,1.000)|1
-GSGKNQVEQSPQSLIILEGKNCTLQCNYTVS-----PF-NNLRWYKQDTGKGPISLTIM
TFS---EN--TK----SNGRYIATLDADTKQSSLH------IT-AAQLSDSASYICVVS-
-----
>V59RF-JYKQ01054940.1-trav |(46970, 47276)|2.97403640693|(0.998,0.994,0.983)|1
VWSQQKEVEQDPGPFSVPEGATVTFNCTYSNS-----AS-QSFFWYRQDSRKEPKLLMSA
YSS---G---N-----EDGRFTAQLNRASQYISLL------IR-DSQLSDSATYLCAVYT
QCSP-
>V60RF-JYKQ01054940.1-trav |(52430, 52727)|2.89429209206|(0.998,0.937,0.976)|1
-GTRAQSVTQLDSQVSVSEGAPVLLRCNYSSS-----VP-PYLFWYVQYPNQGLQLLLKY
TSG---TT--LV---KGINGFEAEFKKSETSFHLR------KA-SAHVSDAAEYFCAVS-
-----
>V61RF-JYKQ01054942.1-trav |(16188, 16478)|2.96248712253|(0.996,0.971,0.998)|1
--VNGENVEQHPSILSVQEGDSSVIKCTYSDS-----AS-NYFPWYKQELGKEPQFIIDI
RSN---AH--EK----KDQRITVLLNKTAKHFSLH------IT-ETQPGDSAVYFCAAS-
-----
>V62RF-JYKQ01054942.1-trav |(38704, 38992)|2.98780001921|(0.998,0.991,0.999)|1
VWS-QQKVEQNSGPLSVPEGAIASLNCTYSDR-----GS-QSFFWYRQYSGQSPELLMST
YSS---GD--K-----EDGRFTAQLNRASQYVSLL------IR-DSQPSDSATYLCAV--
-----
>V65RF-JYKQ01054942.1-trav |(64627, 64920)|2.95737067436|(0.998,1.000,0.964)|1
-VSRGESVGLHLPTVSVQEGDNSVINCTYSDS-----AS-DYFLWYKQESGKGPQSIIDI
RSN---MA--KR----QGQRLTVFLNKTMKHLSLQ------IA-ATEPGDSAVYFCAEN-
-----
>V66RF-JYKQ01054942.1-trav |(70517, 70818)|2.89976559063|(1.000,0.994,0.927)|1
-SGIAQKITQTQPAMFVQEKEAVTLDCTYDTS-----DQSYGLFWYKQPSSGEMIFLILQ
MSY---DK--QN---ATEGRYSLNFQKARKSVNLV------IS-ASQVGDSAMYFCAMR-
-----
>V67RF-JYKQ01054942.1-trav |(88856, 89150)|2.99593600205|(1.000,1.000,0.996)|1
-RTRGDSVTQMEGPVTLSERAFLTINCTYTAT-----GY-PSLFWYVQYPGEGPQLLLKA
TKT---DE---K---GSNKGFEATYRKETTSFHLK------KD-SVQESDSAVYFCALS-
-----
>V68RF-JYKQ01054942.1-trav |(113522, 113815)|2.99286400565|(0.995,1.000,0.998)|1
VWSQQKEVEQNPGPLSVPEGATASLNCTYSNS-----AF-QYFMWYRQYSRKGPQLLIYI
YSS---GN--K-----EDGRFTAQVDKSSKYISLF------IR-DSQPNDSATYFCAMS-
-----
>V70RF-JYKQ01054953.1-trav |(3497, 3784)|2.99699200002|(0.999,1.000,0.998)|1
--VNSQQGEEDPQTLSIQEGENATMNCSYKTS------I-NNLQWYRQDSGRSLVQLILI
RSN---ER--EK----NSGRLRVTLDTSKKSSSLL------IT-ASRAADTASYFCATD-
-----
>V71RF-JYKQ01054957.1-trav |(3986, 4277)|2.95226014987|(0.978,0.989,0.986)|1
-RTNGDSVTQTEGPVTLPERAALTLNCTYQTS-----YS-AFIFWYVQYPNKEPELLLKS
S-E---NQ---E---TNSRGFQASHVKSDSSFHLE------KP-SVQLSDSAVYYCVLR-
-----
>V72RF-JYKQ01054957.1-trav |(7206, 7509)|2.78842728968|(0.959,0.968,0.884)|1
-SSMAQKVTQAQTEISVVEKEDVTLDCVYETR-----DTTYYLFWYKQPPSGELVFLIRQ
NSF---DE--QN---EINGRYYSKFQKSTSSFNLT------IT-ASQVVDSAVYFCALNE
-----
>V73RF-JYKQ01054957.1-trav |(42945, 43232)|2.70767561292|(0.936,0.911,0.877)|1
-LSGEDQVTQSPEALSLQEGDSSSLNCSYTVS-----GL-RGLLWYRQDPGKGPEFLFIL
YSA---GE--EK----EKERLKATLTKKE--SFLH------IT-GPKPEDSATYLCAVQ-
-----
>V76RF-JYKQ01062966.1-iglv |(12021, 12331)|2.98237212748|(1.000,0.989,0.994)|1
-SWAEVVFTQ-PHSVSGSPGQTVTISCTRSSG---SID-SSYVYWYQQRPGSAPTTVIYS
D---------DQRPSGVPDRFSGSIDSSSNSASLT------IS-GLKSEDEADYYCQSYD
SSS--
>V78RF-JYKQ01067101.1-ighv |(5042, 5351)|2.97616819862|(0.999,0.991,0.987)|1
-TQSQVQLVQ-SGAEVKKPGASVKLSCKASGYT-F---TSYGINWVRQAPGQGLEWMGWI
NPS--NGN--TGYAQKFQGRVTMTRDTSTSTAYME------LN-SLRSDDTAVYYCAR--
-----
>V79RF-JYKQ01067101.1-ighv |(30146, 30461)|2.84262047425|(0.999,0.902,0.980)|1
-VLSQVQLQE-SGPGVVKPSETLSLTCAVSGAS-IS-SGYYYWSWIRQPPGKGLEWIGGI
YSN--SGS--TNYNPSLKSRVTISKDTSKNQFSLK------LS-SVTAADTAVYYCAR--
-----
>V81RF-JYKQ01086555.1-ighv |(11851, 12160)|2.80194452986|(0.947,0.885,0.994)|1
-VQCEVQLVE-SGGGVVQPGGSLRLLCAASGFT-F---DDYAMHWVRQAPGKGLEWVSAI
SW--DGDS--TYYADSVKGRFTISRDNAKNSLYLQ------MN-SLRAEDTAVYYCAR--
-----
>V82RF-JYKQ01114545.1-iglv |(3565, 3871)|2.97741612211|(0.998,0.987,0.993)|1
--DSETVVTQ-EPSLSVSSGGTVTLTCGLSSG---SVSTSNYPSWYQQTPGQAPRTLIYR
T---------NTRPSGVPDRFSGSI--LGNKAALT------IT-GAQADDESDYYCMLYM
GSGI-
>V86RF-JYKQ01131090.1-trbv |(36297, 36594)|2.99798400013|(1.000,0.998,1.000)|1
--PVNAGVTQTPKFQILKTGQSMTLQCAQDMN-------HDCMYWYRQDPGMGLRLIHYS
VGE---GS--TDKGE-VPDGYNVTRSN-TEDFPLR------LE-SAAPSQTSVYFCASSY
-----
>V87RF-JYKQ01131090.1-trbv |(40488, 40788)|2.87170890173|(0.993,0.913,0.991)|1
--HTGAGVSQSPRYKVTKRGQDVALRCDPISG-------HDYLYWYQQAPGQGPAFLTYF
QND---AQ--RDKSGLPNDRFSAEMPE-GSVSTLK------IQ-RTEQGDSAVYLCASSL
-----
>V90RF-JYKQ01131090.1-trbv |(60130, 60430)|2.96993200206|(0.991,0.987,0.992)|1
--HTGAGVSQSPRYKVTKRGQDVALRCDPISG-------HVALYWYRRTLGQGPEFLTYF
QND---AQ--PDKSGLPSDRFSAERPE-GSVSTLK------IQ-RTEQGDAAVYLCASSL
-----
>V93RF-JYKQ01131092.1-trbv |(3324, 3621)|2.92749814152|(0.983,1.000,0.950)|1
--LVNAGVTQTQKFQVLKTGQSMTVQCAQDMN-------HDCMYWYRQDPGMGLRLIHYS
DAA---GT--TDKRE-VPSGYNVSRLN-IEDFPLR------LE-SAAPSQTSVYICASSY
-----
>V96RF-JYKQ01131093.1-trbv |(22892, 23189)|2.97974002125|(0.997,0.990,0.993)|1
--PGNAGVTQTPKFQILKTGQSMTLQCAQDMN-------HNYMSWYRQDPGVGLRLIHYS
VGA---GV--TDKGE-VSNGYNVSRLN-TEDFPLS------LE-SAASSQTSVYFCASSY
-----
>V97RF-JYKQ01131094.1-trbv |(5376, 5676)|2.94326255615|(0.996,0.955,0.999)|1
--HTGAGVSQFPRYRVTKRGQDVTLRCDPISG-------HEYLYWYQQAPGQGPELLTYF
QND---AQ--LDKSGLPSDRFSAERTE-GSVSTLK------IQ-RTEQGDSAVYLCASSL
-----
>V98RF-JYKQ01131094.1-trbv |(13819, 14115)|2.91810292772|(0.993,0.946,0.988)|1
--PVDTGVTQSPTHLIKTRGQQVILRCSPISG-------HSSVYWYQQALGQGPQFIFEY
YEK---EE--RGRG-NFPDRFSGRQFP-NYSSELN------VS-ALLLGDSALYLCASSL
-----
>V99RF-JYKQ01131094.1-trbv |(21287, 21594)|2.92372803289|(0.978,0.976,0.970)|1
--PGNADVTQTPKFQVLKTGQSLTLQCAQDMN-------HNYMYWYRQDPGMGLRLIHYS
VGA---GI--TDKGE-VPNGYNVFRLN-TEDFPLR------LE-SAALSQTSVYFCASSD
TTV--
>V100RF-JYKQ01131095.1-trbv |(9158, 9454)|2.94428667923|(0.996,0.962,0.991)|1
--PVDTGVTQSPTHLIKMRGQQVTLRCSPISG-------HSSVSWYQQALGQGPQFIFQY
YEK---EE--RGRG-NFPDRFSGRQFP-NYSSELN------VS-ALLLGDSALYLCASSL
-----
>V101RF-JYKQ01131096.1-trbv |(2555, 2846)|2.94586491212|(0.992,0.993,0.964)|1
----NAGVTQTPKFQVLKTGQSMIVQCAQDMK-------HDYMFWYRQDPGMGLRLIYYS
VTA---GI--TTKGE-VPNGYNVSRIN-TEDFLLR------LE-SAAPSQTSVYFCASSY
-----
>V102RF-JYKQ01131098.1-trbv |(4345, 4645)|2.95644268494|(0.997,0.973,0.989)|1
--HTGAGVSQSPRYKVIKKGQDVALRCDPISG-------HAGLYWYQQALGQGPEFLTYF
NYQ---AQ--PDKSGLPNDRFSAERHE-GSVSTLT------IQ-RTEQQDSAVYLCASSL
-----
>V104RF-JYKQ01131101.1-trbv |(9053, 9353)|2.97311631225|(0.985,0.990,0.999)|1
--HTDARVSQDPRHKITKTGQNVSFKCVPISE-------HNRLYWYRQTLGQGPEFLTYF
QNE---AQ--QDRSGLFSDRFSAERPE-GSISTLM------IQ-HTEQGDSAVYLCASSL
-----
>V105RF-JYKQ01131101.1-trbv |(23980, 24277)|2.98270803341|(0.996,0.999,0.988)|1
--HMDAGITQSPRHKITETGTPVTLRCHQTEN-------HRYMYWYRQDLGRGLRLIHYS
YGV---ED--TDKVE-VSDGYSVSRSK-TEDFLLT------LE-SATRSQTSVYFCASSE
-----
>V107RF-JYKQ01131102.1-trbv |(2948, 3248)|2.9092535536|(0.979,0.989,0.946)|1
--HTDAGVIQSPRHKVTEMGKEVTLRCEPISG-------HTYLFWYRQTMMQGLEFLIYF
NNK---DP--TDDSGMPKDRFSAKMPN-ASFSTLK------IQ-PSEPRDSAVYFCASSL
-----
>V112RF-JYKQ01131104.1-trbv |(2283, 2580)|2.88499822972|(0.995,0.982,0.927)|1
--TVDGGITQSPKYVFRKEGQNVTLSCEQNLN-------HNAMYWYRQDPGQGLRLIYYS
QIV---ND--IQKGD-IAEGYSVSRER-KQSFPLT------VT-SAQRNPTAFYLCASSI
-----
>V114RF-JYKQ01131105.1-trbv |(770, 1075)|2.88914737884|(0.974,0.976,0.943)|1
--SFHAEVTQTPGYLVKGKGQKTKMDCTPEKG-------HTYVYWYQQNQNKEFTFLISF
QDE---QV--LQETELHKKRFSSQCRK-NLPCSLE------IP-SSEPGDTALYLCASSQ
ST---
>V115RF-JYKQ01131107.1-trbv |(8150, 8448)|2.9156309073|(0.991,0.998,0.938)|1
--SMDADVTQTPRNKIAKTGKRIMLECSQTKG-------HDQMYWYRQDPGLGLRLIYYS
FDV---QD--INKGE-ISDGYSVSRQE-QAKFSLS------LE-SATPNQTALYFCATSD
-----
>V118RF-JYKQ01131110.1-trbv |(26751, 27058)|2.96756408064|(0.987,0.997,0.984)|1
--LVDVKVTQSSRYLIKRTGEKVFLECVQDMD-------HERMFWYRQDPGLGLRLIYFS
YDV---KL--NEKGD-IPEGYSVSREK-KERFSLI------LG-STSTNQTSMYLCASSL
STA--
>V119RF-JYKQ01131111.1-trbv |(5907, 6210)|2.91520177457|(0.973,0.949,0.998)|1
-SVFSAVISQKPSRDVCQRGTSVTFQCQVDSQ-------VTMMFWYRQRPGQSMTLIATA
NQG--SEA--TYESGFVIDKFPISRPN-LTFSTLT------VS-NTSPEDSSIYLCSVE-
-----
>V120RF-JYKQ01135385.1-trdv |(1626, 1927)|2.75399730343|(0.959,0.889,0.929)|1
-SGMAQTVTQSQPEVSVREAETVTLSCTYDTS-----ESNYYLFWYKQPPSRQMILIIRQ
EAY---KQ--QN---ATENRFSVNFQKAAKSFSLK------IS-DSQLGDAAMYFCAFM-
-----
>V121RF-JYKQ01135388.1-trav |(4501, 4803)|2.98789600501|(0.998,0.993,0.997)|1
-SGMAQTVTQSQPEMSVQEAETVTLSCTYDTS-----ESNYYLFWYKQPPSRQMILIIRQ
EAY---KQ--QN---ATENRFSVNFQKATKSFSLK------IS-DSQLGDAAMYFCAYRS
-----
>V122RF-JYKQ01135389.1-trav |(2804, 3092)|2.99496000066|(0.999,1.000,0.996)|1
-LSGELKVGQNPLFLSTQEGKNYTIYCNYSTA-----S--DRLYWYRQDPGKSLESLFVL
LSN---GA--VK----QEGRLMASLDTKARLSSLH------IT-AALQDLSATYFCAV--
-----
>V125RF-JYKQ01187337.1-igkv |(7825, 8116)|2.97170483945|(0.997,0.979,0.997)|1
-----IVLTQSPTSMAVSQGERVTISCTASSSVS-----TSYLHWYQQKPGFPPRLLVYR
T---------SNLASGVPARFSGSG--SGTSYTLT------IS-SMEAEDAANYYCQQGN
SIP--
>V126RF-JYKQ01245859.1-ighv |(891, 1200)|2.98870803341|(1.000,0.997,0.992)|1
-AHSQVQLVQ-SGAEVKKPGASVKVSCKASGYT-F---TDYYMHWVRQAPGQGLEWIGWI
NPY--NGN--TKYAQKFQGRVTMTRDTSTSTAYME------LS-SLRSEDTAVYYCAR--
-----
>V127RF-JYKQ01245874.1-ighv |(7328, 7639)|2.8242125406|(0.985,0.887,0.990)|1
-VRCEVQLVE-SGGGVVQPEGSLRLSCAASGFT-F---DDYAMHWVRQAPGKGLEWVSGI
SW--NGDS--TYYADSVKGRFTISRDNAKNSLFLQ------MN-RLRAEDTAVYYCAKD-
-----
>V128RF-JYKQ01245874.1-ighv |(37996, 38302)|2.99096400065|(0.996,0.999,0.996)|1
-VQCEEQLVE-SGGGLVQPGASLRLSCAASGFT-F---SSYDMHWVRQAPGKGLEWVSAI
SI---GGG--TYYPDSVKGRFTVSRDNAKNSLYLQ------MN-SLRAEDTAVYYCAR--
-----
>V130RF-JYKQ01245876.1-ighv |(36255, 36564)|3.0|(1.000,1.000,1.000)|1
-VQCEVQLVE-SGGGLVQPGGSLRLSCAASGFT-F---SSYWMNWVRQAPGKGLEWVSRI
NS--DGSS--TNYADSVKGRFTISRENAKNSLYLQ------MN-SLRAEDTAVYYCTT--
-----
>V131RF-JYKQ01245880.1-ighv |(7638, 7950)|2.99699200002|(0.999,1.000,0.998)|1
-VQCEVQLVE-SGGGLVQPGGSLRLSCVASGFT-F---SDYYMHWARQAPGKGLEWVSRI
SSG-SGSS--TYYPDSVKGRFTISRDNAKNTLYLQ------MN-SLRAEDTAVYYCAR--
-----
>V132RF-JYKQ01245881.1-ighv |(6177, 6492)|2.99699200002|(0.999,1.000,0.998)|1
-VQCEVQLVE-SGGGLVQPGGSLRLSCAASGFT-F---SDHYMDWVRQAPGKGLEWVGFI
KNKADGGT--ADYAASVKGRFTISRDDSKNTLYLQ------MN-SLKTEDTAVYYCTR--
-----
>V135RF-JYKQ01245886.1-ighv |(241, 551)|2.99180001921|(1.000,0.999,0.993)|1
-FQCEVQLVE-SGGGLVQPGGSLRLSCVASGFT-F---SDHYMDWVRQAPGKGLEWVSSI
STG-SGST--TLYPDSVKGRFTISRDNAKNTVYLQ------MN-SLRAEDTAVYYCA---
-----
>V136RF-JYKQ01245888.1-ighv |(1665, 1980)|2.99396400065|(0.997,0.997,1.000)|1
-VQCEVQLVE-SGRGLVQPGGSLRLSCAVSGFT-F---SDHYVSWVRQAPGKGLEWVGFM
RNKANGGR--TEYAASVKGTFTISRDDSKSIASLQ------MS-SLKTEDTAVYYCAR--
-----
>V137RF-JYKQ01245888.1-ighv |(18543, 18855)|2.98430822856|(1.000,0.998,0.987)|1
-VLSQVQLQE-SGPGVVKPSETLSLTCAVSGGS-IS--DSYYWSWIRQAPGKGLEWIGGI
YGS--GSS--TNYNPSLKSRVTISKDTSKNQFSLK------LS-SVTAADTAVYYCAR--
-----
>V138RF-JYKQ01245889.1-ighv |(13016, 13325)|2.99698000014|(1.000,0.999,0.998)|1
-VQCEVQLVE-SGGGLAQPGGSLRLSCAASGFT-F---SSYGMSWVRQAPGKGLEWVSGI
SN--TGGS--IYYADSVKGRFTISRDNSKNTLSLQ------MN-SLRAEDTAVYYCAK--
-----
>V139RF-JYKQ01245890.1-ighv |(4928, 5237)|2.99498000014|(0.998,1.000,0.997)|1
-VQCDVQLVE-SGGGLVKPGGSLRLSCVASGFT-F---SSYAMHWVRQAPGKGLEWVSVI
ST--SGGT--TYYADSVKGRFTISRDNAKNSLFLQ------MN-SLRAEDTAVYYCTR--
-----
>V141RF-JYKQ01245904.1-ighv |(629, 938)|2.98008440501|(0.998,1.000,0.983)|1
-VQCEVQLVE-SGGGVVQPGGSLRLSCAASGFT-F---DDYAMGWVRQAPGKGLEWVSAI
SW--DGDS--TGYADSVKGRFTISRDNAKNSLSLQ------MN-SLRAEDTAVYYCAR--
-----
>V142RF-JYKQ01005004.1-igkv |(7879, 8179)|2.97761205453|(0.997,0.988,0.993)|-1
-TTGETVMTQSPATLSLSPGERATLSCRASQSVG------SSLAWYQQKPGQAPRLLVYY
A---------SSRATGIPDRFSGSG--SGTDFTLT------IS-SLDPEDVGVYYCQKYN
DWP--
>V143RF-JYKQ01005007.1-igkv |(665, 964)|2.98751211712|(1.000,0.989,0.999)|-1
-TTGEIVMTQSPATLSLSPGERATLSCRASQSVG------SYLAWYQQKPGQAPRLLIYG
A---------SSRATGIPDRFSGSG--SGTEFTLT------IS-SLEPEDFAVYYCQQYN
NWN--
>V144RF-JYKQ01005012.1-igkv |(8346, 8639)|2.97639727933|(0.999,1.000,0.979)|-1
-ARCDIQMTQSPSSLSASVGDRVTITCRASQGIS------TYLNWYQQKPGKAPKLLIYA
A---------SSLQSGVPSRFSGSG--SGTVFTLT------IS-SLQSEDFATYYCLQYN
S----
>V145RF-JYKQ01005013.1-igkv |(2914, 3214)|2.99899600001|(1.000,0.999,1.000)|-1
-AKCDIQMTQSPSSLSASVGDRVTITCRASQGIS------SYLAWYQQKPGKAPKPLIYY
A---------SNLESGVPSRFSGSG--SGTDFTLT------IS-SLQPEDFATYYCQQYN
SAP--
>V146RF-JYKQ01005014.1-igkv |(6504, 6804)|2.99799600001|(0.999,0.999,1.000)|-1
-ARCDIQMTQSPSSLSASAGDRVTITCRASQGIS------SYLAWYQQKPGKAPKLLIYD
A---------SNLQSGVPSRFSGSG--SGTEFTLT------IS-SLQPEDFAVYYCQQRN
SYP--
>V148RF-JYKQ01005018.1-igkv |(609, 897)|2.86870003129|(1.000,0.918,0.979)|-1
-----IVLTQSPGTLSLSPGERATLSCRASQSVS------SSLAWYQQKPGQVPRLLIYG
A---------SSRATGIPDRFSGSG--SGTEFTLT------IS-SLEPEDFAVYYCQQYS
NWP--
>V149RF-JYKQ01005018.1-igkv |(13195, 13495)|3.0|(1.000,1.000,1.000)|-1
-ARCDIQMTQSPSSLSASVGDRVTITCRASQGIS------TYLNWYQQKPGKAPKLLIYA
A---------SRLESGVPSRFSGSG--SGTEFTLT------IS-SLQPEDFATYYCQQYN
SNP--
>V150RF-JYKQ01005019.1-igkv |(2049, 2337)|2.86870003129|(1.000,0.918,0.979)|-1
-----IVLTQSPGTLSLSPGERATLSCRASQSVS------SSLAWYQQKPGQVPRLLIYG
A---------SSRATGIPDRFSGSG--SGTEFTLT------IS-SLEPEDFAVYYCQQYS
NWP--
>V151RF-JYKQ01005022.1-igkv |(4846, 5146)|2.99899600001|(1.000,0.999,1.000)|-1
-ARCDIQMTQSPSSLSASAGDRVTITCRASQGIS------TYLNWYQQKPGKAPKLLIYA
A---------SSLQSGVPSRFSGSG--SGTEFTLT------IS-SLQPEDFATYYCQQYN
SYP--
>V152RF-JYKQ01005026.1-igkv |(2797, 3089)|3.0|(1.000,1.000,1.000)|-1
-AKCDIQMTQSPSSLSASVGDRVTITCRASQTIS------SYLAWYQQKPGKVPKLLIYA
A---------SSLESGVPSRFSGSG--SGTEFTLT------IS-SLQPEDFATYYCQQHN
-----
>V153RF-JYKQ01005027.1-igkv |(25376, 25667)|2.98782001102|(0.999,0.993,0.996)|-1
----DIQMTQSPASLSASVGDRVTITCRASQSFS------SSLAWYQQKPGKAPKLLIYS
A---------SSLQSGVPSRFSGSK--SGTDFTLT------IS-SLQPEDIASYYCQQYY
STP--
>V154RF-JYKQ01005032.1-igkv |(9334, 9634)|2.97478066996|(0.999,0.982,0.995)|-1
-TTGQVILTQSPATLSLSPGERATLSCRASQSVS------SNLAWYQQKPGQAPRLLIYG
A---------SSRATGIPDRFSGSG--SGTEFTLT------IS-SLEPEDFAVYYCQKYS
SSP--
>V156RF-JYKQ01005033.1-igkv |(2883, 3181)|2.88316657621|(0.998,0.914,0.999)|-1
-SKGEIVLTQSPAFRSVTLKEKVTITCQASQSIG------SSLHWYQQKPDQSPKLLIKY
A---------SQSISGVPSRFSGSG--SGTDFTLT------IN-SLEAEDAATYYCQQSR
SF---
>V160RF-JYKQ01015003.1-ighv |(1329, 1641)|2.97998400013|(0.994,0.994,0.992)|-1
-VLSQVQLQE-SGPGLVKPSETLSLTCAVSGGS-IS--GSYGWNWIRQPPGKGLEWIGRI
YGS--SGN--TYYNPSLKSRVTISRDTSKNQFSLK------LS-SVAAADTAVYYCAR--
-----
>V162RF-JYKQ01015026.1-ighv |(1663, 1972)|2.84007575588|(0.949,0.918,0.981)|-1
-AHSEMQLVQ-SEAEVKKPGASVKVSCKASGYT-F---TYRYLHWVRQTPGQGLEWMGWI
TPY--NGN--TNYAQKFQGRVTITRDRSMSTAYME------LS-SLRSEDTAVYYCAR--
-----
>V167RF-JYKQ01026663.1-trav |(902, 1202)|2.7495910766|(0.916,0.939,0.898)|-1
-SSVAQKVTQTQSSVSMPVEKAVTLNCQYETSR----W-SYYLFWYKQPPSKEMIFLIRQ
GSS---EP---N---AKSGRYSVNFQKAASSIALT------IS-ALQLEDSATYFCALWE
-----
>V173RF-JYKQ01042861.1-ighv |(9368, 9683)|2.99899600001|(1.000,1.000,0.999)|-1
-VQCEVQLVE-SGGGLVQPGGSLRLSCAASGFT-F---SDYYMYWVRQAPGKGLEWVGFI
RSKAYGGT--AEYAASVKGRFTISRDDSKSIASLQ------MN-SLRAEDTAVYYCTR--
-----
>V174RF-JYKQ01044654.1-igkv |(1250, 1550)|3.0|(1.000,1.000,1.000)|-1
-ARCDIQMTQSPSSLSASVGDKVTITCHASQGIS------SWLAWYQQKPGKAPKPLIYK
A---------SSLQSGVPSRFSGSG--SGTDFTLT------IS-SLQPEDFATYYCQQNS
SSP--
>V176RF-JYKQ01044662.1-igkv |(2570, 2870)|3.0|(1.000,1.000,1.000)|-1
-AKCDIQMTQSPPSLSASVGDRVTITCRASQGIS------NWLAWYQQKPGEAPKLLIYA
A---------STLQSGVPSRFSGSG--SGTEFTLT------IS-SLQPEDFATYYCQQHN
SYP--
>V178RF-JYKQ01052439.1-igkv |(123, 425)|2.88557299062|(0.981,0.991,0.926)|-1
-SSGDVVMTQSPLSLSVTIGQPASISCRSSQSLVHS-DGKTYLNWLQQKPGQPPRRLIYQ
V---------SNRDSGVPDRFSGSG--AGTDFTLK------IS-RVETEDVGVYYCVQG-
-----
>V179RF-JYKQ01052440.1-igkv |(29428, 29728)|2.99078801933|(1.000,0.998,0.993)|-1
-ARCDIQLTQSPSSLSASVGDRVTITCQASQGIS------NNLAWYQQKPGKVPKLLIYA
A---------STLQSGVPSRFSGSG--SGTDFTLT------IS-SLQPEDFATYYCQHGY
GTP--
>V183RF-JYKQ01052440.1-igkv |(90005, 90305)|2.99899600001|(1.000,1.000,0.999)|-1
-ARCDIQMTQSPSSLSASVGDRVTITCRASQGIS------NYLNWYQQKPGKAPKLLIYR
A---------SNLETGVPSRFSGSG--SGTDFTLT------IS-SLQPEDIATYYCQKHD
NSP--
>V185RF-JYKQ01052440.1-igkv |(120035, 120335)|2.991|(0.997,0.997,0.997)|-1
-ARCDIQMTQSPSSLSASIGDRVTITCRASQNIY------SNLAWYQQKPGKAPKPLIYY
A---------SSVETGVPSRFSGSG--SGTDYTLT------IS-SLQPEDVATYYCQQYD
NSP--
>V186RF-JYKQ01052441.1-igkv |(8581, 8881)|2.99696400065|(1.000,0.997,1.000)|-1
-ARCDILMTQSPASLSASVGDRVTITCRASQGIS------NYLAWYQQKPGETPKLLIYA
A---------SSLQSGIPSRFSGSG--SGTDFTLT------IS-SLQPEDFATYYCQHYY
STP--
>V188RF-JYKQ01052443.1-igkv |(11550, 11850)|2.9918400105|(1.000,0.998,0.994)|-1
-ARCDIQMTQSPSSLSASVGDRVTITCQASQSLS------NYLNWYQQKPGKIPKLLIYG
A---------SSLQSGIPSRFSGSG--SGTDYTLT------IS-SLQPEDFATYYCQQGY
SNP--
>V192RF-JYKQ01052444.1-igkv |(27757, 28057)|2.9889000027|(0.994,0.998,0.997)|-1
-ARCDIQMTQSPSSLSASVGDRVTITCRASQGIN------KELAWYQQKPGKAPMLLLYS
G---------SSLHTGVPSQFSGSG--SGTDFTLT------IS-SLQPEDVATYYCRQDY
TTP--
>V194RF-JYKQ01052444.1-igkv |(45830, 46130)|2.99385601037|(1.000,0.994,1.000)|-1
-ARCDIQMTQSPSSLSASVGDRVTITCRASQGIG------NYLAWYQQKPGETPKLLIYA
A---------SSLQSGIPSRFSGSG--SGTDYTLT------IS-SLQPEDFATYYCQQGY
SNP--
>V196RF-JYKQ01052450.1-igkv |(9881, 10181)|2.99185201038|(0.999,0.993,1.000)|-1
-ARCDIQMTQSPSSLSASVGDRVTITCRASQSIN------KELDWYQQKPGKAPTLLIYA
A---------SSLQTGVSSRFSGSG--SGTDFTLT------IS-SLQPEDVATYYCQQDY
TTP--
>V198RF-JYKQ01056010.1-ighv |(10615, 10921)|2.994900005|(1.000,1.000,0.995)|-1
-VQCEVQLVE-SGGGLVQPGGSLRLSCAASGFT-F---SSYAMQWVHQAPGKGLEWVSAI
GP--G-GD--TYYADAVKGRFTISRDNAKNSLYLQ------MN-SLRAEDTAVYYCAR--
-----
>V200RF-JYKQ01062878.1-ighv |(882, 1191)|2.99696400065|(1.000,1.000,0.997)|-1
-VQCEVQLVE-SGGGLVKPGASLRLSCAASGFT-F---SSYGMHWVRQAPGKGLEWVSYI
SSD--SSY--IYYADSVKGRFTISRDNAKNSLSLQ------MN-SLKTEDTAVYYCAR--
-----
>V201RF-JYKQ01062881.1-ighv |(1585, 1894)|2.96543912445|(0.999,0.995,0.974)|-1
-AHSQVQLVQ-SGAEVKKPGSSVKVSCKASGYT-F---TDYYMQWVRQAPGQGLEWMRWI
NPY--NGN--TKYAQKFQGRVTMTRDTSTSTAYME------LS-SLRSEDTAVYYCAT--
-----
>V202RF-JYKQ01062881.1-ighv |(4488, 4803)|2.85925823461|(0.917,0.998,0.993)|-1
-VQCEVQLVE-SGGGLVQPGGSLRLSCAASGFT-F---SNHCMSWVRQAPGKGLEWVGFI
RNKAKGGT--AEYAASVKGRFTISRDDSKSIAILQ------MN-SLKTEDTAMYYCTR--
-----
>V208RF-JYKQ01075085.1-igkv |(254, 554)|2.99089600501|(0.995,0.996,1.000)|-1
-ARCDIQMSQSPPSLSASVGDRVTITCQACQGIS------NYLAWYQQKPGKAPKLLIYA
A---------STLQSGVPSRFSGSG--SGTEFTLT------IS-SLQPEDFATYYCQQRN
SYP--
>V209RF-JYKQ01076935.1-igkv |(39827, 40127)|3.0|(1.000,1.000,1.000)|-1
-ARCDIQMTQSPSSLSASVGDTVTITCQASQGIS------DYLAWYQQKPGKAPKLLIYA
A---------SNLESGVPSRFSGSG--SGTEFTLT------IS-SLQPEDFATYYCQQYD
SDP--
>V210RF-JYKQ01076937.1-igkv |(20686, 20986)|2.96491360742|(0.979,0.988,1.000)|-1
-ARCDIQMSQSPSSLSASVGDRVTITCRASQGIS------NALAWFQQKPGKAPKLLIYA
A---------SSLQSGVPSRFSGSG--SGTDYTLT------IS-SLQPEDFATYYCQQGY
STP--
>V211RF-JYKQ01076937.1-igkv |(32283, 32583)|2.99899600001|(1.000,1.000,0.999)|-1
-ARCDIQMTQSPSSLSASVGDRVTITCRASQGIS------SYLNWYQQKPGKAPKLLIYY
A---------TSLESGVPSRFSGSG--SGTEFILT------IS-SLQPEDFATYYCQQHN
SYP--
>V212RF-JYKQ01076937.1-igkv |(51727, 52015)|2.8159980249|(0.991,0.879,0.995)|-1
-----IVMTQSPATLSLSLGETATISCRTSQSVG------RKLAWYQQKPGQAPRLLIYG
A---------SSRATGIPDRFSGSG--SGTDFTLT------IS-SLEPEDFAVYYCQETS
NLS--
>V213RF-JYKQ01080923.1-iglv |(36388, 36700)|3.0|(1.000,1.000,1.000)|-1
-SWAEVVFTQ-PHSVSGSPGQTVTISCTRSSG---SID-SKYVQWYQQRPGSAPTTVIYE
D---------NKRPSGVPDRFSGSIDSSSNSASLT------IS-GLKSEDEADYYCQSAD
GSYT-
>V215RF-JYKQ01081225.1-igkv |(3273, 3573)|2.99899600001|(1.000,1.000,0.999)|-1
-ARCDIQMTQSPSSLSASVGDKVTITCQASQSIS------SWLTWYQQKPGKAPKLLIYK
A---------STLQSGVPSRFSGSG--SGTEFTLT------IS-SLQPEDFATYYCQQFS
SAP--
>V218RF-JYKQ01126545.1-iglv |(13640, 13950)|2.98793200206|(0.997,0.998,0.993)|-1
-SWAQAALTQ-PPSVSGSPGQSVTISCTGTSS---DIGGYNYVSWYQQHPGKAPKLMIYD
V---------SKRPSGVSDRFSGSK--SGNTASLT------IS-GLQAEDEADYYCSSYA
SSST-
>V219RF-JYKQ01126545.1-iglv |(37360, 37652)|2.92691671673|(0.994,0.949,0.992)|-1
----SYELTQ-PPSVSVSPGQTARITCS---G---DALPEKYAYWYQQKPGQSPVLIIYE
D---------SKRPSGIPERFSGSS--SGTVATLT------IS-GAQVEDEADYYCYSAD
SSGN-
>V221RF-JYKQ01126545.1-iglv |(48188, 48491)|2.99385601037|(1.000,0.994,1.000)|-1
-SWAQAALTQ-PHSVSGSPGQSVTISCTGTSS---DIGGYDRVSWYQQHPGKAPKLMIYE
V---------SKRPSGVSDRFSGSK--SGNTASLT------IS-GLQAEDEADYYCSSYA
GS---
>V222RF-JYKQ01126545.1-iglv |(71572, 71866)|2.89463026991|(0.976,0.953,0.968)|-1
----QSALIQ-SPSVSGSLGQSVTISCTGTSS---DIGRYNYVSWYQQQPGTTTKLMMYN
V---------NTRPSGVSDRFSGSK--SGNTASLT------IS-GLQAEDEADYYCSSYE
AS---
>V224RF-JYKQ01126546.1-iglv |(24524, 24834)|2.99496800026|(0.997,0.999,0.999)|-1
-SWAQSALTQ-PPSVSGSPGQSVTISCTGTSS---DVGGYSYVSWYQQHPGKAPKLMIYG
V---------SNRPSGVSDRFSGSK--SGNTASLT------IS-GLQAEDEADYYCCSYT
TSST-
>V225RF-JYKQ01126546.1-iglv |(36976, 37279)|2.86968718425|(0.982,0.922,0.980)|-1
-SAASYDLTQ-PPSVSVSPGQTARITCG---G---DNIESEAVHWYQQKPPQAPVLVIYA
D---------SERPSGIPERFSGSK--SGNTATLT------IS-GVEAGDEADYYCQMWD
SSSKH
>V227RF-JYKQ01126546.1-iglv |(60437, 60740)|2.97406187285|(0.999,0.977,1.000)|-1
-SAASYDVTQ-PRSVSVSPGQTARITCG---G---DNIGSKYVQWYQQKPAQAPVLVIYD
N---------SDRPSGIPERFSGSN--SGNTATLT------IS-GVEAGDEADYYCQVWD
SSSDH
>V229RF-JYKQ01126546.1-iglv |(71769, 72072)|2.95558947566|(0.999,0.995,0.966)|-1
-SWAQAALTQ-PPSVSGSPGQSVTISCTGTSN---DVGGYNYVSWYQQHPGKALKLMIYE
V---------SKRPTGVSDRFSGSK--SGNTASLT------IS-GLQAEDEADYYCGSYS
GS---
>V232RF-JYKQ01126546.1-iglv |(116413, 116723)|2.98153608204|(0.996,1.000,0.986)|-1
-SWAQSALTQ-PPSVSGSPGQSVTISCTGTSS---DVGGYNYVSWYQQHPGKAPKLMIYE
V---------SKRPSGVSDRFSGSK--SGNTASLT------IS-GLQAEDEADYYCSSYR
SSNT-
>V237RF-JYKQ01126580.1-iglv |(2043, 2350)|2.99385601037|(1.000,1.000,0.994)|-1
-SWAQSVLTQ-PPSVSGDPGQRVTISCTGSSS---NI-GGYDVYWYQQVPGTAPKLLIYD
N---------NKRPSGVSDRFSGSK--SGTSASLT------IT-GLQTEDEADYYCQSYD
SSLS-
>V238RF-JYKQ01126580.1-iglv |(7851, 8158)|2.97168933582|(0.980,0.997,0.997)|-1
-SWAQSVLTQ-PPSVSGAPGQKVTISCTGSSS---NIG-GYNVYWYQLLPGTAPKLLIYD
N---------NKRPSGISDRFSGSK--SGTSASLA------IT-GLQSEDEADYYCQSYD
SSLS-
>V239RF-JYKQ01126581.1-iglv |(5729, 6039)|2.98667205249|(0.999,0.998,0.990)|-1
-SLSQPVLTQ-PASLSASPGASARLTCTLSSG---INVGSYSIYWYQQKPGSPPRYLLYY
YSD---SD--KHQGSGVPSRFSGSKDASANAGLLL------IS-GLQSEDEADYYCAI--
-----
>V241RF-JYKQ01126581.1-iglv |(20501, 20808)|2.99596000066|(1.000,0.997,0.999)|-1
-SWAQSVLTQ-PPSVSGAPGQRVTISCTGSSS---NIG-GYYVQWYQQLPGTAPKLLIYG
N---------NKRPSGVSDRFSGSQ--SGTSASLA------IT-GLQSEDEADYYCEAWD
NSLS-
>V242RF-JYKQ01126585.1-iglv |(7447, 7757)|2.74533318446|(0.977,0.853,0.975)|-1
-SLSQPVLTQ-PASLSASPGASVRLTCTLRSG---ISVGGYNIHWYQQKPGSPPRYLLYY
YSD---SN--KGQGSGVPSRFSGSKDASANAGILL------IS-GFQSEDEADYYCTT--
-----
>V243RF-JYKQ01126585.1-iglv |(12290, 12599)|2.988900005|(0.998,0.993,0.998)|-1
-SWAQSVLTQ-PPSASGAPGQRVTISCSGSSS---NIG-SNYVSWYQQLSGKAPKLLIYK
N---------NQRPSGVPDRFSGSK--SGNSASLA------IS-GLQSEDEADYYCAAWD
DSLSG
>V247RF-JYKQ01126589.1-iglv |(2854, 3164)|2.98560004313|(1.000,0.994,0.992)|-1
-SWAQSVLTQ-PPSVSGAPGQRVTISCTGSSS---NIGAGYYVQWYQQLPGTAPKLLIYE
N---------NKRPSGVTDRFSGSK--SGTSASLT------IT-GLQSEDEADYYCQSYD
SSLS-
>V248RF-JYKQ01126589.1-iglv |(33453, 33763)|2.82936424628|(0.994,0.898,0.975)|-1
-SLSQPVLTQ-PTSLSASPGASARLTCTLRSG---ISVGSYRIYWYQQKPGSPRRYLLNY
YSD---SD--KHQGSGVPSRFSGSKDASANAGILL------IS-GLQPEDEADYYCMI--
-----
>V249RF-JYKQ01126589.1-iglv |(38258, 38567)|2.99280401921|(1.000,0.993,1.000)|-1
-SWAQSVLTQ-PPSASGAPGQRVTISCSGSSS---NIG-SNYVYWYQQFPGTAPKLLIYY
S---------NQRPSGVPDRFSGSK--SGTSASLA------IT-GLQSEDEADYYCAAWD
NSLSG
>V253RF-JYKQ01187347.1-igkv |(14093, 14411)|2.97083253448|(0.998,0.982,0.992)|-1
-ACGDIVMTQSPDSLAVSLGERVTINCKSSQSLLYSSNNKNYLAWYQQKPGQAPKLLISW
A---------STRESGVPNRFSGSG--SGTDFTLT------IS-GLQAEDVAVYYCQQHY
SSP--
>V254RF-JYKQ01237599.1-ighv |(479, 788)|2.99196000066|(0.998,0.995,0.999)|-1
-VQGEVQLVE-SGGGLSKPGGSLRLSCAASGFT-F---SDYNMHWVRQASGKGLEWVSGI
SN--DGGS--TWYADSVKGRFTISRENAKNTLYLQ------MN-SLRAEDTAVYYCAG--
-----
