# Supplementary material for: Iterative Variable Gene Discovery from Whole Genome Sequencing with a Bootstrapped Multiresolution Algorithm
Source: Comput Math Methods Med. 2019 Feb 11;2019:3780245. doi: 10.1155/2019/3780245 (PMC6388353; doi:10.1155/2019/3780245)
Supplement: Supplementary Materials — supp_materialsV2.pdf: this is an updated document, which includes new figures requested by the reviewer. sequences_alignments.zip: these are genome sequence files that are relevant for reproducing some of the results. [file 3780245.f1.zip › 3780245.f1/sequences_alignments/bstrp_iteration_1_r.nwk]

(V9RF-ABDC01282056.1-ighv:0.14304,(V45RF-ABDC01377237.1-ighv:0.02302,(V4RF-ABDC01231268.1-ighv:0.00055,V138RF-ABDC01493416.1-ighv:0.01116)0.966:0.05819)0.761:0.01322,((((V118RF-CABD02117416.1-ighv:0.04216,((V10RF-JZKE01244690.1-ighv:0.08845,((V127RF-ABDC01396906.1-ighv:0.09677,(V44RF-AJFE01045048.1-ighv:0.00055,V160RF-AACZ03171037.1-ighv:0.01122)0.689:0.00245)0.537:0.02251,(V107RF-AACZ03097910.1-ighv:0.00055,(((V100RF-AQIB01153501.1-ighv:0.09384,V127RF-JYKQ01245874.1-ighv:0.04308)0.744:0.01137,(V222RF-AHZZ01103094.1-ighv:0.01087,(V115RF-CABD02117395.1-ighv:0.05601,V124RF-AQIB01153543.1-ighv:0.00054)0.145:0.02194)0.890:0.03461)0.742:0.02136,(V118RF-AQIB01153537.1-ighv:0.04486,(V81RF-JYKQ01086555.1-ighv:0.01082,V141RF-JYKQ01245904.1-ighv:0.03517)0.911:0.02187)0.847:0.00054)0.891:0.03254)0.821:0.02228)0.872:0.02817)0.738:0.00908,V27RF-ABGA01044319.1-ighv:0.03420)0.903:0.03494)0.888:0.03764,(V58RF-AGCE01147750.1-ighv:0.20080,V118RF-AGCE01148188.1-ighv:0.06421)0.733:0.01728)0.755:0.01432,((((V130RF-JYKQ01245876.1-ighv:0.03037,(V54RF-JABR01091180.1-ighv:0.06873,((V1RF-AJFE01003265.1-ighv:0.0,V117RF-AACZ03106490.1-ighv:0.0):0.04293,(V145RF-CABD02117499.1-ighv:0.01054,(V3RF-AJFE01011110.1-ighv:0.0,V91RF-AACZ03097899.1-ighv:0.0):0.00055)0.768:0.01071)0.771:0.01044)0.736:0.01208)0.347:0.01057,V162RF-AQIA01075825.1-ighv:0.03531)0.742:0.01275,V104RF-AQIB01153507.1-ighv:0.03446)0.740:0.01256,((((V14RF-AHZZ01064625.1-ighv:0.06878,(((((((V40RF-AHZZ01098950.1-ighv:0.03232,V137RF-JABR01077916.1-ighv:0.04488)0.776:0.01619,V167RF-AQIA01075832.1-ighv:0.00054)0.791:0.01571,(V154RF-AQIA01075814.1-ighv:0.01130,V160RF-JYKQ01015003.1-ighv:0.05898)0.192:0.00998)0.770:0.01056,((((V28RF-ABGA01058270.1-ighv:0.05585,V30RF-ABGA01058270.1-ighv:0.05703)0.864:0.02476,(V18RF-ABGA01044306.1-ighv:0.02155,((((V17RF-ABGA01044305.1-ighv:0.02159,V181RF-AHZZ01069461.1-ighv:0.05784)0.000:0.00054,V14RF-ABGA01044302.1-ighv:0.01052)0.498:0.00055,(V113RF-ADFV01131950.1-ighv:0.01068,V103RF-ABGA01313761.1-ighv:0.01074)0.800:0.01062)0.000:0.00054,V62RF-ABGA01104801.1-ighv:0.02102)0.842:0.01386)0.000:0.00054)0.856:0.01312,(V140RF-CABD02117482.1-ighv:0.03182,(V45RF-AJFE01045051.1-ighv:0.01090,V99RF-AACZ03097904.1-ighv:0.00054)0.874:0.02209)0.887:0.02109)0.000:0.00055,(V20RF-ABGA01044307.1-ighv:0.00930,(((V109RF-AACZ03097916.1-ighv:0.01058,V114RF-AGCE01147923.1-ighv:0.10405)0.688:0.01081,(V16RF-ABGA01044304.1-ighv:0.00055,V13RF-ABGA01037228.1-ighv:0.01092)0.622:0.00054)0.914:0.02094,V61RF-ABGA01104800.1-ighv:0.03245)0.758:0.01245)0.776:0.00928)0.903:0.02297)0.768:0.01152,(((V230RF-AQIB01153518.1-ighv:0.03075,V173RF-AQIA01075844.1-ighv:0.04237)0.780:0.00055,((V177RF-AQIA01075856.1-ighv:0.02035,(V178RF-AQIA01075857.1-ighv:0.00062,V79RF-JYKQ01067101.1-ighv:0.01995)0.938:0.04122)0.759:0.00998,V20RF-JABR01074704.1-ighv:0.02042)0.814:0.00998)0.874:0.02140,((V138RF-JABR01077917.1-ighv:0.02165,V116RF-AQIB01153517.1-ighv:0.06662)0.734:0.02894,V246RF-AHZZ01108758.1-ighv:0.08337)0.777:0.01437)0.861:0.01993)0.581:0.00055,((((V171RF-AQIA01075834.1-ighv:0.04236,(V166RF-AACZ03171037.1-ighv:0.0,V190RF-AACZ03098100.1-ighv:0.0):0.06478)0.805:0.01866,((V176RF-AQIA01075855.1-ighv:0.02210,V254RF-AHZZ01112481.1-ighv:0.03167)0.303:0.01084,V97RF-AQIB01153492.1-ighv:0.04341)0.406:0.01209)0.390:0.01079,(V39RF-AHZZ01098942.1-ighv:0.05574,((V249RF-AQIA01066387.1-ighv:0.01255,(V183RF-AQIA01075862.1-ighv:0.00053,V180RF-AQIA01075860.1-ighv:0.04442)0.923:0.03153)0.788:0.01108,V29RF-AHZZ01091603.1-ighv:0.06844)0.682:0.00608)0.776:0.01283)0.768:0.01117,((V205RF-AHZZ01090494.1-ighv:0.04188,(V214RF-AHZZ01096568.1-ighv:0.00054,V225RF-AHZZ01103258.1-ighv:0.01982)0.840:0.01981)0.942:0.04267,((V179RF-AQIA01075859.1-ighv:0.03189,(V77RF-AHZZ01129142.1-ighv:0.01104,V84RF-AQIB01153480.1-ighv:0.05913)0.545:0.01036)0.787:0.01061,(V137RF-JYKQ01245888.1-ighv:0.04195,V172RF-AQIA01075834.1-ighv:0.01797)0.682:0.00422)0.388:0.01022)0.725:0.01067)0.813:0.01045)0.861:0.02017,V88RF-JABR01035060.1-ighv:0.02213)0.325:0.02298)0.999:0.51030,((V207RF-JABR01190886.1-ighv:0.40547,(((V104RF-ADFV01131938.1-ighv:0.0,V105RF-ADFV01131939.1-ighv:0.0):0.04685,(V165RF-AACZ03171037.1-ighv:0.01032,((V38RF-JYKQ01041707.1-ighv:0.04637,(V146RF-CABD02117506.1-ighv:0.00051,(V90RF-AACZ03097899.1-ighv:0.00052,V0RF-ABGA01025787.1-ighv:0.04437)0.927:0.01039)0.802:0.04113)0.898:0.03336,V123RF-CABD02117431.1-ighv:0.00054)0.937:0.03240)0.794:0.01754)0.978:0.11376,(((V120RF-ADFV01131958.1-ighv:0.00054,((V15RF-ABGA01044302.1-ighv:0.0,V105RF-ABGA01313763.1-ighv:0.0):0.04151,V141RF-CABD02117482.1-ighv:0.01075)0.909:0.03060)0.994:0.06569,(V191RF-AACZ03098100.1-ighv:0.00054,(V235RF-ABGA01360478.1-ighv:0.09203,V113RF-CABD02117385.1-ighv:0.00997)1.000:0.00055)0.952:0.04270)0.775:0.01038,((V140RF-JABR01078980.1-ighv:0.05917,((V51RF-JABR01089346.1-ighv:0.02993,V103RF-JABR01068488.1-ighv:0.02273)0.979:0.07629,V141RF-JABR01086102.1-ighv:0.00054)0.529:0.03133)0.991:0.10080,(((((V126RF-JYKQ01245859.1-ighv:0.01086,V201RF-JYKQ01062881.1-ighv:0.04371)0.870:0.00054,(V57RF-AGCE01147749.1-ighv:0.06938,(((V40RF-AJFE01045037.1-ighv:0.03465,V51RF-ABGA01099940.1-ighv:0.05349)0.973:0.08915,((V110RF-ADFV01131946.1-ighv:0.03205,V121RF-ADFV01131959.1-ighv:0.03587)0.843:0.03393,V218RF-AHZZ01096575.1-ighv:0.06109)0.758:0.01789)0.306:0.04176,(V254RF-AQIA01073275.1-ighv:0.06834,V111RF-AQIB01153509.1-ighv:0.03758)0.316:0.04113)0.857:0.03935)0.964:0.06872)0.758:0.02108,(((V123RF-AQIB01153541.1-ighv:0.02700,V162RF-JYKQ01015026.1-ighv:0.00524)0.777:0.03246,((V51RF-AJFE01045051.1-ighv:0.0,V106RF-AACZ03097906.1-ighv:0.0):0.03205,V134RF-CABD02117467.1-ighv:0.02142)0.871:0.02697)0.994:0.09653,V72RF-AGCE01148067.1-ighv:0.07440)0.676:0.00411)0.801:0.01085,((((V96RF-JABR01055994.1-ighv:0.02203,(V119RF-AQIB01153538.1-ighv:0.02135,V78RF-JYKQ01067101.1-ighv:0.04337)0.770:0.00880)0.900:0.04271,(V120RF-AJFE01045444.1-ighv:0.0,V161RF-AACZ03171037.1-ighv:0.0):0.03391)0.697:0.04340,(V234RF-ABGA01360476.1-ighv:0.08767,((V149RF-CABD02117767.1-ighv:0.02003,(V188RF-AACZ03098097.1-ighv:0.08897,V148RF-CABD02117766.1-ighv:0.02165)0.686:0.00361)0.822:0.01983,V103RF-ADFV01131933.1-ighv:0.05517)0.764:0.01045)0.768:0.01573)0.832:0.01551,((V50RF-AJFE01045051.1-ighv:0.0,V105RF-AACZ03097906.1-ighv:0.0):0.07614,(V34RF-CABD02136332.1-ighv:0.0,V133RF-CABD02117467.1-ighv:0.0):0.00564)0.970:0.06367)0.520:0.00055)0.828:0.01967,V113RF-AGCE01147919.1-ighv:0.08282)0.339:0.01473)0.820:0.00054)0.920:0.08578)0.424:0.09790)0.838:0.16597,((((V1RF-AQIB01018215.1-trgv:0.01190,((V64RF-AQIA01046502.1-trgv:0.0,V2RF-JYKQ01003191.1-trgv:0.0):0.03160,V8RF-JABR01052882.1-trgv:0.02073)0.707:0.00953)0.882:0.04402,(V96RF-ADFV01046571.1-trgv:0.06390,(((V29RF-AJFE01038666.1-trgv:0.00053,V2RF-AACZ03050973.1-trgv:0.02048)0.952:0.04936,((V92RF-ABGA01290202.1-trgv:0.00054,V152RF-ABGA01132346.1-trgv:0.01046)0.759:0.01068,(V27RF-AJFE01038664.1-trgv:0.00054,V166RF-CABD02337338.1-trgv:0.03101)0.343:0.02084)0.858:0.02482)0.688:0.02157,V91RF-ABGA01290201.1-trgv:0.04755)0.759:0.02113)0.894:0.05649)0.775:0.09464,(((((V65RF-AQIA01046502.1-trgv:0.03100,(V2RF-AQIB01018217.1-trgv:0.03006,V1RF-JYKQ01003191.1-trgv:0.00055)0.849:0.01978)0.331:0.01010,V0RF-AQIB01018214.1-trgv:0.00055)0.819:0.02967,V1RF-AHZZ01030316.1-trgv:0.00055)0.782:0.00054,V63RF-AQIA01046502.1-trgv:0.00990)0.837:0.02587,(V90RF-ABGA01290201.1-trgv:0.00153,(V28RF-AJFE01038665.1-trgv:0.00980,V168RF-CABD02337341.1-trgv:0.05341)0.975:0.06447)0.884:0.04739)0.714:0.05615)0.999:1.91758,((((V125RF-JYKQ01187337.1-igkv:0.00055,(V8RF-AHZZ01040804.1-igkv:0.00055,V53RF-AQIB01144282.1-igkv:0.03299)0.840:0.01060)0.969:0.17229,((((V58RF-ABDC01394567.1-igkv:0.25595,(((V205RF-AQIA01017118.1-igkv:0.01062,V49RF-AHZZ01104241.1-igkv:0.00055)0.995:0.18240,((((((V41RF-AQIB01144273.1-igkv:0.04635,V215RF-AQIA01017123.1-igkv:0.02215)0.777:0.01044,((((V179RF-JYKQ01052440.1-igkv:0.00054,((V38RF-CABD02196554.1-igkv:0.01029,V160RF-CABD02196553.1-igkv:0.00055)0.744:0.01196,(V11RF-AJFE01012232.1-igkv:0.02125,V137RF-AACZ03151853.1-igkv:0.01055)0.893:0.03314)0.985:0.08148)0.776:0.01075,(V50RF-AQIA01017109.1-igkv:0.00055,V105RF-AHZZ01042084.1-igkv:0.02186)0.727:0.02250)0.767:0.01404,((V100RF-AHZZ01042080.1-igkv:0.02188,((V47RF-AQIA01017099.1-igkv:0.06491,V123RF-AHZZ01042093.1-igkv:0.04093)0.965:0.07112,V15RF-AQIB01144243.1-igkv:0.00054)0.436:0.02210)0.876:0.04075,V48RF-JABR01088351.1-igkv:0.02537)0.949:0.05713)0.794:0.02023,(V161RF-CABD02196556.1-igkv:0.02184,(((V50RF-JABR01088351.1-igkv:0.04661,V51RF-AQIA01017115.1-igkv:0.09158)0.751:0.01085,V136RF-ADFV01132961.1-igkv:0.07195)0.758:0.01035,(V10RF-AJFE01012232.1-igkv:0.01103,V136RF-AACZ03151853.1-igkv:0.02249)0.806:0.00207)0.633:0.00054)0.721:0.02223)0.907:0.03376)0.000:0.00054,((((V194RF-JYKQ01052444.1-igkv:0.02206,(V186RF-JYKQ01052441.1-igkv:0.02188,(((V49RF-AQIA01017105.1-igkv:0.0,V118RF-AQIA01058133.1-igkv:0.0):0.02158,((V108RF-AHZZ01042085.1-igkv:0.00053,(V49RF-JABR01088351.1-igkv:0.03206,V14RF-AQIB01144243.1-igkv:0.00055)0.818:0.01066)0.000:0.00054,V103RF-AHZZ01042083.1-igkv:0.08098)0.840:0.01068)0.855:0.00053,V47RF-JABR01088351.1-igkv:0.04377)0.894:0.02236)0.921:0.03382)0.737:0.01093,((V121RF-AHZZ01042093.1-igkv:0.02950,(V0RF-CABD02043817.1-igkv:0.01007,((((((V55RF-AACZ03070936.1-igkv:0.00054,(V170RF-CABD02379503.1-igkv:0.01016,(V163RF-CABD02196901.1-igkv:0.01021,V169RF-CABD02379427.1-igkv:0.00055)0.000:0.00055)0.843:0.01018)0.414:0.01016,V198RF-AACZ03151911.1-igkv:0.03070)0.000:0.00055,V120RF-AACZ03126842.1-igkv:0.01010)0.000:0.00055,(V214RF-AACZ03179806.1-igkv:0.01017,(V197RF-AACZ03151873.1-igkv:0.00055,V215RF-AACZ03183442.1-igkv:0.01027)0.931:0.03078)0.991:0.00054)0.946:0.00055,V209RF-AACZ03179013.1-igkv:0.00055)0.989:0.00054,V208RF-AACZ03178854.1-igkv:0.02026)0.776:0.00990)0.886:0.02679)0.789:0.01771,(V188RF-JYKQ01052443.1-igkv:0.00054,(V193RF-AQIA01007908.1-igkv:0.02171,V11RF-AQIB01144242.1-igkv:0.02142)0.930:0.02189)0.970:0.05538)0.868:0.02304)0.778:0.01099,(V58RF-ADFV01138112.1-igkv:0.03722,(V37RF-AGCE01134600.1-igkv:0.10343,V102RF-ADFV01106214.1-igkv:0.02322)0.756:0.01693)0.867:0.02666)0.790:0.01061,V210RF-JYKQ01076937.1-igkv:0.03407)0.786:0.01101)0.892:0.02317,((((V42RF-AQIB01144273.1-igkv:0.03230,(V47RF-AGCE01134610.1-igkv:0.09770,(V31RF-JABR01076261.1-igkv:0.04326,(V135RF-ABGA01394071.1-igkv:0.05786,V107RF-ABGA01318850.1-igkv:0.05567)0.382:0.02159)0.768:0.01271)0.754:0.01103)0.819:0.02160,((V48RF-AGCE01134612.1-igkv:0.01121,V49RF-AGCE01134613.1-igkv:0.01063)0.987:0.05558,(V134RF-ABGA01394068.1-igkv:0.01880,(V123RF-AJFE01047586.1-igkv:0.0,V179RF-AACZ03015562.1-igkv:0.0):0.04397)0.653:0.00345)0.887:0.02219)0.785:0.00053,((((V3RF-ABDC01165520.1-igkv:0.0,V98RF-ABDC01522041.1-igkv:0.0):0.14366,V4RF-JZKE01218258.1-igkv:0.10900)0.864:0.04771,((V18RF-AQIB01144251.1-igkv:0.03392,(((V196RF-AQIA01017118.1-igkv:0.00054,(V96RF-AHZZ01042078.1-igkv:0.01066,V185RF-JYKQ01052440.1-igkv:0.04195)0.963:0.05479)0.888:0.02165,V19RF-AQIB01144257.1-igkv:0.01107)0.756:0.01069,V98RF-JABR01061517.1-igkv:0.03326)0.961:0.05695)0.777:0.01056,(((V12RF-AJFE01012232.1-igkv:0.05784,(V140RF-ADFV01132961.1-igkv:0.04428,V155RF-ABGA01161530.1-igkv:0.02158)0.754:0.01144)0.875:0.02176,V183RF-JYKQ01052440.1-igkv:0.01058)0.391:0.02254,V55RF-AQIA01017115.1-igkv:0.00055)0.898:0.02647)0.766:0.02221)0.440:0.01206,V138RF-ADFV01132961.1-igkv:0.12892)0.953:0.07212)0.774:0.00054,((V142RF-AACZ03151853.1-igkv:0.01084,(V112RF-ABGA01342015.1-igkv:0.00054,(V144RF-ADFV01132961.1-igkv:0.03308,V42RF-AGCE01134604.1-igkv:0.04492)0.770:0.01054)0.869:0.02136)0.982:0.06852,((((((((V158RF-ABGA01180644.1-igkv:0.03276,(V214RF-AQIA01017123.1-igkv:0.00055,(V237RF-AHZZ01106331.1-igkv:0.00055,V145RF-JYKQ01005013.1-igkv:0.01065)0.931:0.01095)0.922:0.03330)0.912:0.03351,(V147RF-AACZ03151855.1-igkv:0.00054,(V39RF-ADFV01106195.1-igkv:0.02246,V154RF-ABGA01154386.1-igkv:0.06874)0.900:0.00055)0.000:0.00055)0.828:0.01085,((V117RF-ABGA01356729.1-igkv:0.02707,(V113RF-ABGA01356721.1-igkv:0.02414,((V157RF-ABGA01180641.1-igkv:0.01059,V159RF-ABGA01180644.1-igkv:0.01089)0.891:0.02478,(V109RF-ABGA01321409.1-igkv:0.01084,V197RF-ABGA01276916.1-igkv:0.01115)0.918:0.04136)0.547:0.01616)0.257:0.01354)0.477:0.01638,((V150RF-AACZ03151857.1-igkv:0.04370,V39RF-CABD02196563.1-igkv:0.01089)0.759:0.01154,(V85RF-ABGA01285648.1-igkv:0.05087,V38RF-AGCE01134600.1-igkv:0.10050)0.775:0.01798)0.885:0.02126)0.911:0.00054)0.000:0.00055,((((V49RF-AQIB01144276.1-igkv:0.02100,(((V36RF-JABR01076263.1-igkv:0.00054,(V260RF-AHZZ01189918.1-igkv:0.01120,V209RF-JYKQ01076935.1-igkv:0.01051)0.986:0.05620)0.809:0.02048,(V50RF-AGCE01134614.1-igkv:0.04296,V53RF-AGCE01134616.1-igkv:0.00055)0.845:0.03665)0.782:0.01296,(V41RF-JABR01076266.1-igkv:0.01514,(V40RF-JABR01076266.1-igkv:0.00054,V50RF-AQIB01144276.1-igkv:0.04393)0.867:0.02956)0.390:0.01096)0.760:0.01238)0.662:0.02914,((V227RF-AQIA01017135.1-igkv:0.01891,V140RF-AQIB01156901.1-igkv:0.00568)0.927:0.04207,((((V174RF-JYKQ01044654.1-igkv:0.01068,(V225RF-AQIA01017130.1-igkv:0.04627,V226RF-AQIA01017133.1-igkv:0.00054)0.912:0.01047)0.808:0.01072,(V82RF-AHZZ01176978.1-igkv:0.02148,(V248RF-AHZZ01111138.1-igkv:0.0,V251RF-AHZZ01111367.1-igkv:0.0):0.00055)0.845:0.01065)0.809:0.00054,(V45RF-AQIB01144274.1-igkv:0.02155,(V215RF-JYKQ01081225.1-igkv:0.03125,(V66RF-AHZZ01109397.1-igkv:0.01090,V48RF-JYKQ01051981.1-igkv:0.00055)0.937:0.04514)0.867:0.02892)0.827:0.01726)0.905:0.02077,(V247RF-AHZZ01110488.1-igkv:0.02213,V47RF-AQIB01144276.1-igkv:0.04396)0.645:0.00407)0.875:0.02895)0.814:0.02035)0.638:0.00055,V34RF-JABR01076263.1-igkv:0.00054)0.885:0.02402,V40RF-ADFV01106195.1-igkv:0.03048)0.871:0.02167)0.830:0.01075,((V177RF-AACZ03015561.1-igkv:0.03322,(V154RF-AACZ03151979.1-igkv:0.02278,V153RF-CABD02196513.1-igkv:0.03436)0.761:0.01150)0.919:0.03303,((V208RF-AQIA01017120.1-igkv:0.0,V53RF-AHZZ01104243.1-igkv:0.0,V152RF-JYKQ01005026.1-igkv:0.0):0.00055,V33RF-AQIB01144265.1-igkv:0.01125)0.910:0.03577)0.810:0.02154)0.142:0.00054,((V38RF-ADFV01106195.1-igkv:0.02351,(((V65RF-AHZZ01109397.1-igkv:0.03452,(V146RF-JYKQ01005014.1-igkv:0.01068,(((V213RF-AQIA01017123.1-igkv:0.02198,V217RF-AQIA01017125.1-igkv:0.00054)0.915:0.02168,V236RF-AHZZ01106331.1-igkv:0.00054)0.000:0.00055,V38RF-AQIB01144269.1-igkv:0.02214)0.849:0.01067)0.470:0.00054)0.835:0.02190,V223RF-AQIA01017128.1-igkv:0.01052)0.855:0.02201,(((V245RF-AHZZ01107399.1-igkv:0.00055,V176RF-JYKQ01044662.1-igkv:0.01089)0.959:0.03273,(V253RF-AHZZ01111367.1-igkv:0.01075,V208RF-JYKQ01075085.1-igkv:0.03271)0.000:0.00054)0.000:0.00054,V250RF-AHZZ01111138.1-igkv:0.02164)0.947:0.03454)0.739:0.01116)0.750:0.00902,((V84RF-AJFE01002352.1-igkv:0.0,V47RF-CABD02196595.1-igkv:0.0):0.06734,(V152RF-AACZ03151858.1-igkv:0.02132,V44RF-CABD02196587.1-igkv:0.05354)0.788:0.01458)0.400:0.01075)1.000:0.00054)0.825:0.01059,V86RF-ABGA01285649.1-igkv:0.04471)0.939:0.00055,((((V211RF-JYKQ01076937.1-igkv:0.02152,((V262RF-AHZZ01189923.1-igkv:0.04387,V218RF-AQIA01017126.1-igkv:0.05793)0.064:0.01083,V44RF-AQIB01144274.1-igkv:0.09400)0.364:0.00054)0.917:0.02225,(V29RF-JABR01076261.1-igkv:0.00054,V32RF-JABR01076263.1-igkv:0.05570)0.905:0.03316)0.177:0.00055,(V220RF-AQIA01017128.1-igkv:0.02226,(((V34RF-AQIB01144265.1-igkv:0.03502,V39RF-AQIB01144273.1-igkv:0.08014)0.506:0.00053,((V156RF-CABD02196521.1-igkv:0.02203,(V21RF-AJFE01012238.1-igkv:0.01067,V146RF-AACZ03151855.1-igkv:0.00055)0.933:0.03238)0.775:0.01145,(V57RF-AHZZ01105091.1-igkv:0.03297,V50RF-JYKQ01051984.1-igkv:0.07701)0.953:0.04532)0.767:0.01000)0.869:0.02101,(((V209RF-AQIA01017120.1-igkv:0.00658,V144RF-JYKQ01005012.1-igkv:0.02247)1.000:0.00463,(V151RF-JYKQ01005022.1-igkv:0.01118,V238RF-AHZZ01106331.1-igkv:0.03339)0.739:0.01094)0.649:0.01093,(V72RF-AHZZ01117753.1-igkv:0.03190,V149RF-JYKQ01005018.1-igkv:0.01214)0.859:0.02144)0.857:0.01095)1.000:0.00055)0.661:0.01085)0.844:0.02085,(((V115RF-ABGA01356724.1-igkv:0.01278,((V23RF-AJFE01012245.1-igkv:0.0,V149RF-AACZ03151857.1-igkv:0.0):0.04049,V43RF-CABD02196586.1-igkv:0.01511)0.762:0.03180)0.818:0.01988,(V211RF-AQIA01017120.1-igkv:0.01087,V36RF-AQIB01144265.1-igkv:0.03277)0.922:0.03292)0.052:0.01042,V36RF-ADFV01106193.1-igkv:0.04401)0.885:0.00055)0.727:0.01131)0.865:0.01074)0.000:0.00053)0.779:0.01090)0.875:0.02190,((V32RF-AQIB01144265.1-igkv:0.03369,(V27RF-JABR01076261.1-igkv:0.04249,(V52RF-AHZZ01104243.1-igkv:0.00055,(V207RF-AQIA01017120.1-igkv:0.01076,V153RF-JYKQ01005027.1-igkv:0.02189)0.780:0.01059)0.908:0.02908)0.662:0.00320)0.946:0.03335,((V33RF-AGCE01134599.1-igkv:0.04849,((V154RF-CABD02196515.1-igkv:0.02234,(V83RF-AJFE01002289.1-igkv:0.00055,V181RF-AACZ03015562.1-igkv:0.01103)0.000:0.00055)0.931:0.06183,((V132RF-ADFV01132961.1-igkv:0.03933,(V194RF-ABGA01257772.1-igkv:0.01064,((V7RF-AJFE01011588.1-igkv:0.01088,V183RF-AACZ03015754.1-igkv:0.01081)0.895:0.02204,V48RF-CABD02199693.1-igkv:0.01045)0.796:0.01065)0.764:0.01406)0.246:0.01086,((V3RF-AQIB01144236.1-igkv:0.01068,(V37RF-AQIA01017096.1-igkv:0.03185,((V111RF-AHZZ01042093.1-igkv:0.00054,V196RF-JYKQ01052450.1-igkv:0.01048)0.764:0.02165,V44RF-JABR01088351.1-igkv:0.01043)0.426:0.00055)0.808:0.01063)0.763:0.01560,(V192RF-JYKQ01052444.1-igkv:0.02155,(V44RF-AQIA01017097.1-igkv:0.02199,V119RF-AHZZ01042093.1-igkv:0.03282)0.848:0.00054)0.984:0.07251)0.786:0.01244)0.892:0.03648)0.791:0.02850)0.279:0.00055,(V76RF-ABGA01198108.1-igkv:0.07793,V185RF-AACZ03016143.1-igkv:0.13949)0.974:0.06769)0.903:0.03081)0.753:0.01084)0.006:0.00055,V182RF-AACZ03015564.1-igkv:0.05629)0.472:0.04031)0.708:0.04673,(V59RF-AQIA01017140.1-igkv:0.01308,V92RF-AHZZ01040807.1-igkv:0.00886)0.966:0.11061)0.832:0.05803)0.946:0.13150,(((V206RF-AQIA01017120.1-igkv:0.0,V51RF-AHZZ01104243.1-igkv:0.0):0.01132,V31RF-AQIB01144265.1-igkv:0.00055)0.975:0.10076,(V157RF-CABD02196542.1-igkv:0.02599,(V24RF-JABR01076260.1-igkv:0.00053,(V203RF-AQIA01017118.1-igkv:0.01029,(V27RF-AQIB01144264.1-igkv:0.00055,(V156RF-JYKQ01005033.1-igkv:0.01042,V47RF-AHZZ01104241.1-igkv:0.02074)0.000:0.00054)0.000:0.00053)0.786:0.02081)0.763:0.01635)0.980:0.12873)0.949:0.11429)0.835:0.10516,(((V33RF-JZKE01097728.1-igkv:0.03430,(V107RF-AGCE01134619.1-igkv:0.13139,(V61RF-AQIA01017150.1-igkv:0.00055,(V93RF-AHZZ01040808.1-igkv:0.00985,V253RF-JYKQ01187347.1-igkv:0.00962)0.909:0.02010)0.902:0.04325)0.711:0.03527)0.979:0.15357,(((V16RF-AJFE01012235.1-igkv:0.0,V143RF-AACZ03151853.1-igkv:0.0):0.08912,((V143RF-ABDC01562688.1-igkv:0.03242,(V30RF-ABDC01351837.1-igkv:0.05778,V32RF-JZKE01296733.1-igkv:0.06664)0.213:0.01176)0.984:0.09779,(V159RF-CABD02196547.1-igkv:0.04627,(V197RF-AQIA01017118.1-igkv:0.01040,V178RF-JYKQ01052439.1-igkv:0.04753)0.925:0.04662)0.861:0.03704)0.024:0.03367)0.857:0.05369,(((((V106RF-AHZZ01042085.1-igkv:0.02162,V48RF-AQIA01017100.1-igkv:0.02201)0.000:0.00055,(V12RF-AQIB01144242.1-igkv:0.02126,((((V41RF-AGCE01134603.1-igkv:0.03278,V37RF-ABDC01360666.1-igkv:0.09622)0.771:0.01176,V9RF-AQIB01144240.1-igkv:0.05608)0.495:0.02158,(V142RF-ADFV01132961.1-igkv:0.04274,(V22RF-JABR01076259.1-igkv:0.10225,(V15RF-AJFE01012234.1-igkv:0.0,V141RF-AACZ03151853.1-igkv:0.0):0.02234)0.904:0.04421)0.911:0.00054)0.887:0.02156,(V141RF-AQIB01158310.1-igkv:0.04015,(V36RF-AQIA01017094.1-igkv:0.06919,(V109RF-AHZZ01042091.1-igkv:0.00055,(((V14RF-AJFE01012234.1-igkv:0.00055,V140RF-AACZ03151853.1-igkv:0.01023)0.875:0.03741,(V137RF-ADFV01132961.1-igkv:0.04286,V130RF-ABGA01394062.1-igkv:0.04766)0.871:0.04464)0.747:0.01433,V39RF-AGCE01134602.1-igkv:0.08705)0.881:0.02139)0.263:0.01040)0.856:0.02058)0.618:0.00268)0.787:0.01100)0.782:0.01046)0.971:0.04420,V36RF-AGCE01134600.1-igkv:0.00055)0.777:0.01896,((V35RF-AGCE01134600.1-igkv:0.11931,(V53RF-JYKQ01052451.1-igkv:0.03456,(V4RF-AQIB01144236.1-igkv:0.00947,(V115RF-AHZZ01042093.1-igkv:0.01025,V43RF-JABR01088351.1-igkv:0.04100)0.893:0.00054)0.836:0.01613)0.372:0.01317)0.770:0.01022,(V9RF-AJFE01012232.1-igkv:0.02507,V135RF-ADFV01132961.1-igkv:0.14009)0.894:0.04651)0.876:0.03512)0.790:0.03022,V43RF-AGCE01134604.1-igkv:0.03152)0.162:0.02957)1.000:0.26560)0.868:0.07379,((V84RF-ABGA01285645.1-igkv:0.03487,V110RF-ABGA01321410.1-igkv:0.00055)0.795:0.02726,(V116RF-ABGA01356726.1-igkv:0.04569,((V45RF-CABD02196588.1-igkv:0.02217,(V136RF-ABGA01394075.1-igkv:0.02560,(V51RF-AGCE01134616.1-igkv:0.03378,V54RF-AGCE01134617.1-igkv:0.03363)0.959:0.05531)0.742:0.00986)0.783:0.01887,(V221RF-ABGA01315458.1-igkv:0.00055,(((V180RF-AACZ03015562.1-igkv:0.07995,(V219RF-AQIA01017126.1-igkv:0.00054,(V43RF-AQIB01144273.1-igkv:0.08948,(V261RF-AHZZ01189922.1-igkv:0.00055,V212RF-JYKQ01076937.1-igkv:0.01117)0.766:0.01132)0.449:0.02318)0.996:0.08316)0.000:0.00054,((((V244RF-AHZZ01107395.1-igkv:0.03771,V224RF-AQIA01017128.1-igkv:0.02026)0.775:0.01320,(((V226RF-AHZZ01104243.1-igkv:0.06804,(((V228RF-AQIA01017135.1-igkv:0.01776,V259RF-AHZZ01185532.1-igkv:0.13444)0.850:0.02928,((V216RF-AQIA01017123.1-igkv:0.01168,(V239RF-AHZZ01106331.1-igkv:0.01094,V142RF-JYKQ01005004.1-igkv:0.00053)0.365:0.02207)0.987:0.07142,V256RF-AQIA01075132.1-igkv:0.00054)0.738:0.01187)0.929:0.03287,(V73RF-AHZZ01117754.1-igkv:0.0,V35RF-AQIB01144265.1-igkv:0.0):0.00054)0.786:0.01083)0.741:0.01082,(V37RF-JABR01076263.1-igkv:0.02207,V143RF-JYKQ01005007.1-igkv:0.00055)0.815:0.01104)0.449:0.02337,((((V33RF-ADFV01106193.1-igkv:0.08373,(V28RF-AQIB01144264.1-igkv:0.03382,V48RF-AHZZ01104241.1-igkv:0.02103)0.690:0.00054)0.816:0.01085,(V204RF-AQIA01017118.1-igkv:0.00054,V154RF-JYKQ01005032.1-igkv:0.02119)0.900:0.02116)0.892:0.02214,((V224RF-AQIB01144282.1-igkv:0.00055,(V57RF-AQIA01017139.1-igkv:0.00055,V89RF-AHZZ01040804.1-igkv:0.01095)0.822:0.01096)1.000:0.13230,(V37RF-ADFV01106193.1-igkv:0.09560,(V132RF-ABGA01394066.1-igkv:0.06929,(V18RF-AJFE01012236.1-igkv:0.02282,V145RF-AACZ03151855.1-igkv:0.00055)0.776:0.01776)0.822:0.02184)0.772:0.01850)0.855:0.00054)0.813:0.03272,((V148RF-JYKQ01005018.1-igkv:0.0,V150RF-JYKQ01005019.1-igkv:0.0):0.03396,V210RF-AQIA01017120.1-igkv:0.00055)0.284:0.01107)0.675:0.00055)0.903:0.03214)0.760:0.01666,((V79RF-AHZZ01143621.1-igkv:0.0,V249RF-AHZZ01111138.1-igkv:0.0,V252RF-AHZZ01111367.1-igkv:0.0):0.04259,(V35RF-JABR01076263.1-igkv:0.03431,(V222RF-AQIA01017128.1-igkv:0.00054,V67RF-AHZZ01109398.1-igkv:0.02240)0.804:0.02219)0.927:0.03889)0.795:0.01870)0.849:0.01776,V39RF-JABR01076265.1-igkv:0.00054)0.727:0.01108)0.832:0.02171,(V88RF-ABGA01290070.1-igkv:0.01127,(V24RF-AJFE01012249.1-igkv:0.01081,V151RF-AACZ03151858.1-igkv:0.01076)0.944:0.04400)0.915:0.03448)0.761:0.01162)0.764:0.01610)0.801:0.02784)0.849:0.06716)0.970:0.12101)0.804:0.04099)0.424:0.03084,(V52RF-AQIB01144282.1-igkv:0.02996,(V229RF-AQIA01017139.1-igkv:0.01024,V178RF-AACZ03015561.1-igkv:0.05273)0.725:0.01187)1.000:0.27482)0.487:0.05494)0.888:0.18208,(((((((V80RF-JZKE01238797.1-iglv:0.00999,(V21RF-JZKE01249944.1-iglv:0.01829,V72RF-ABDC01418168.1-iglv:0.11948)0.823:0.03658)0.793:0.00997,((V141RF-ABDC01540867.1-iglv:0.0,V145RF-ABDC01624510.1-iglv:0.0):0.03092,(V14RF-ABDC01296165.1-iglv:0.02069,(V33RF-ABDC01359388.1-iglv:0.0,V134RF-ABDC01465190.1-iglv:0.0):0.03025)0.883:0.02156)0.734:0.00908)0.000:0.00053,(((V21RF-ABDC01342328.1-iglv:0.04094,V131RF-ABDC01425625.1-iglv:0.02212)0.933:0.04061,(V83RF-ABDC01442374.1-iglv:0.09421,V70RF-ABDC01417539.1-iglv:0.07366)0.634:0.00713)0.880:0.02770,V81RF-JZKE01238799.1-iglv:0.00783)0.740:0.01237)0.821:0.02886,(((V76RF-JYKQ01062966.1-iglv:0.01943,(V55RF-AQIB01146122.1-iglv:0.03070,V27RF-AQIA01007590.1-iglv:0.02021)0.752:0.00995)0.769:0.01615,(((V188RF-ABGA01252248.1-iglv:0.05649,V134RF-JABR01077601.1-iglv:0.05106)0.346:0.01115,(V30RF-AQIA01007600.1-iglv:0.01330,(V31RF-AHZZ01097949.1-iglv:0.00964,V213RF-JYKQ01080923.1-iglv:0.00974)0.824:0.01793)0.792:0.01445)0.780:0.01690,V41RF-AHZZ01099970.1-iglv:0.00942)0.803:0.01824)0.961:0.06040,(V132RF-JABR01077601.1-iglv:0.06085,(V50RF-CABD02231318.1-iglv:0.00054,(V193RF-AACZ03127313.1-iglv:0.00055,(V174RF-AACZ03176987.1-iglv:0.00997,V110RF-AJFE01022796.1-iglv:0.04054)0.132:0.00953)0.891:0.01922)0.893:0.03013)0.597:0.02052)0.887:0.04296)0.966:0.12192,(((V222RF-JYKQ01126545.1-iglv:0.00055,(V265RF-AHZZ01198550.1-iglv:0.00054,V83RF-AQIB01146141.1-iglv:0.02937)0.911:0.01054)0.992:0.13214,(((V266RF-AHZZ01198551.1-iglv:0.05451,(V35RF-AQIA01009608.1-iglv:0.03161,(V76RF-AQIB01146138.1-iglv:0.05575,V229RF-AHZZ01105199.1-iglv:0.02158)0.752:0.01005)0.995:0.07581)0.754:0.00925,((((((((V264RF-AHZZ01198550.1-iglv:0.0,V221RF-JYKQ01126545.1-iglv:0.0):0.02071,V78RF-AQIB01146140.1-iglv:0.01297)0.434:0.01312,(V1RF-AQIA01007574.1-iglv:0.00055,V82RF-AQIB01146141.1-iglv:0.02083)0.912:0.02067)0.845:0.00054,V4RF-AQIA01007574.1-iglv:0.00054)0.899:0.01344,V218RF-JYKQ01126545.1-iglv:0.00979)0.000:0.00054,V272RF-AHZZ01198553.1-iglv:0.00985)0.881:0.00983,(((V61RF-CABD02231421.1-iglv:0.05334,(V90RF-AJFE01010827.1-iglv:0.04006,V60RF-CABD02231419.1-iglv:0.03040)0.385:0.01008)0.525:0.00054,(V68RF-AQIB01146133.1-iglv:0.01059,(V234RF-AHZZ01105201.1-iglv:0.01404,(V224RF-JYKQ01126546.1-iglv:0.01005,(V33RF-AQIA01009600.1-iglv:0.01047,V72RF-AQIB01146136.1-iglv:0.03194)0.785:0.01065)0.780:0.00922)0.780:0.01662)0.870:0.01992)0.966:0.00054,(V232RF-JYKQ01126546.1-iglv:0.00919,(V177RF-ABGA01252219.1-iglv:0.01075,((V178RF-ABGA01252219.1-iglv:0.01986,V207RF-AACZ03177116.1-iglv:0.04204)0.852:0.02185,V176RF-ABGA01252219.1-iglv:0.03136)0.000:0.00054)0.971:0.04110)0.852:0.01055)0.819:0.01947)0.903:0.00054,(((V79RF-AQIB01146140.1-iglv:0.00998,(V5RF-AQIA01007575.1-iglv:0.01052,V229RF-JYKQ01126546.1-iglv:0.05401)0.648:0.00054)0.915:0.01997,(V98RF-AJFE01017584.1-iglv:0.02021,(V167RF-ABGA01252206.1-iglv:0.06143,V64RF-CABD02231427.1-iglv:0.02021)0.899:0.02998)0.933:0.03050)0.655:0.00055,(((V8RF-AQIA01007576.1-iglv:0.01175,(V49RF-ADFV01126756.1-iglv:0.03178,V115RF-JABR01071856.1-iglv:0.02180)0.765:0.01143)0.855:0.02689,(V171RF-ABGA01252216.1-iglv:0.07370,V227RF-AHZZ01105198.1-iglv:0.00054)0.891:0.01024)1.000:0.00060,(V105RF-JABR01071855.1-iglv:0.00055,V111RF-JABR01071856.1-iglv:0.03185)0.987:0.06226)0.785:0.01121)0.885:0.01962)0.868:0.02018)0.761:0.00926,((V104RF-JABR01071855.1-iglv:0.00054,((V99RF-AJFE01017586.1-iglv:0.0,V216RF-AACZ03191230.1-iglv:0.0):0.00055,V128RF-AACZ03127139.1-iglv:0.02066)0.932:0.02309)0.922:0.03497,V107RF-JABR01071855.1-iglv:0.04077)0.768:0.01405)0.669:0.02005)0.991:0.15287,((((V79RF-JZKE01238797.1-iglv:0.08429,(V18RF-ABDC01318810.1-iglv:0.02964,(V75RF-ABDC01422153.1-iglv:0.0,V88RF-ABDC01466438.1-iglv:0.0):0.04609)0.892:0.04602)0.987:0.12494,((V19RF-AQIA01007586.1-iglv:0.01072,V193RF-AHZZ01089506.1-iglv:0.00055)0.978:0.06522,(((V56RF-AQIB01146122.1-iglv:0.03310,(V237RF-JYKQ01126580.1-iglv:0.03213,V64RF-AQIB01146122.1-iglv:0.03181)0.072:0.01748)0.635:0.00055,(V102RF-AJFE01020628.1-iglv:0.04638,(V194RF-AHZZ01089506.1-iglv:0.03055,V238RF-JYKQ01126580.1-iglv:0.01027)0.923:0.03267)0.762:0.01218)0.791:0.01180,(V25RF-AQIA01007589.1-iglv:0.01015,(V247RF-JYKQ01126589.1-iglv:0.00997,((V44RF-AHZZ01099973.1-iglv:0.00499,(V20RF-AQIA01007586.1-iglv:0.03267,(V122RF-JABR01071860.1-iglv:0.01103,V128RF-JABR01071862.1-iglv:0.03393)0.219:0.01098)0.895:0.03308)0.757:0.01639,((V18RF-AQIA01007586.1-iglv:0.04499,(V63RF-AQIB01146122.1-iglv:0.03117,V241RF-JYKQ01126581.1-iglv:0.03143)0.775:0.01050)0.725:0.01063,V121RF-JABR01071860.1-iglv:0.05289)0.919:0.04080)0.767:0.00994)0.755:0.01000)0.855:0.01934)0.733:0.01578)0.447:0.00314)0.737:0.03615,((V17RF-AQIA01007586.1-iglv:0.08437,(V192RF-AHZZ01089506.1-iglv:0.02583,((V107RF-AJFE01020634.1-iglv:0.0,V51RF-CABD02231359.1-iglv:0.0):0.02924,V185RF-ABGA01252243.1-iglv:0.04543)0.829:0.02243)0.719:0.01883)0.955:0.06179,(V104RF-AGCE01112674.1-iglv:0.14339,(((((V243RF-JYKQ01126585.1-iglv:0.02024,V61RF-AQIB01146122.1-iglv:0.04030)0.879:0.01814,V3RF-JABR01016432.1-iglv:0.05111)0.920:0.00053,V22RF-AQIA01007587.1-iglv:0.01079)0.871:0.01976,(V118RF-JABR01071859.1-iglv:0.01320,(V14RF-AQIA01007584.1-iglv:0.00054,(V66RF-AQIB01146123.1-iglv:0.04118,V196RF-AHZZ01089506.1-iglv:0.00944)0.760:0.00955)0.960:0.04712)0.983:0.07052)0.773:0.01044,(((((V183RF-ABGA01252241.1-iglv:0.03051,V186RF-ABGA01252243.1-iglv:0.01017)0.856:0.02904,((V23RF-AQIA01007588.1-iglv:0.01988,V201RF-AHZZ01089508.1-iglv:0.00055)0.845:0.02120,(V58RF-AQIB01146122.1-iglv:0.05198,V249RF-JYKQ01126589.1-iglv:0.01095)0.343:0.01067)0.943:0.04073)0.784:0.01170,(((V76RF-JABR01189674.1-iglv:0.0,V127RF-JABR01071862.1-iglv:0.0):0.09433,V124RF-JABR01071861.1-iglv:0.02910)0.761:0.01101,(V43RF-ADFV01126738.1-iglv:0.03879,(V47RF-ADFV01126742.1-iglv:0.01008,V131RF-ADFV01132918.1-iglv:0.03014)0.846:0.01954)0.761:0.01093)0.844:0.01991)0.732:0.01030,(V172RF-AACZ03176953.1-iglv:0.01022,(V104RF-AJFE01020631.1-iglv:0.02005,(V54RF-CABD02231362.1-iglv:0.00054,V55RF-CABD02231364.1-iglv:0.01968)0.871:0.01992)0.620:0.00963)0.868:0.02049)0.764:0.01085,V130RF-JABR01071862.1-iglv:0.13937)0.754:0.01001)0.859:0.04394)0.844:0.02869)0.848:0.03471)0.812:0.03657,V110RF-AGCE01135277.1-iglv:0.10706)0.864:0.05265)0.842:0.05602)0.931:0.13943,((((V102RF-AGCE01112648.1-iglv:0.11301,(V113RF-JABR01071856.1-iglv:0.05450,((V11RF-AQIA01007576.1-iglv:0.02022,V75RF-AQIB01146137.1-iglv:0.01008)0.854:0.01999,((V89RF-AJFE01010827.1-iglv:0.0,V124RF-AACZ03127131.1-iglv:0.0):0.02000,V175RF-ABGA01252219.1-iglv:0.04105)0.754:0.00990)0.816:0.01898)0.831:0.02648)0.302:0.03057,(V24RF-ABDC01349227.1-iglv:0.07908,((V86RF-ABDC01449636.1-iglv:0.00055,(V25RF-ABDC01349230.1-iglv:0.01004,V52RF-ABDC01384523.1-iglv:0.00054)0.909:0.04118)0.985:0.14188,V26RF-JZKE01249957.1-iglv:0.05105)0.173:0.03955)0.954:0.11912)0.967:0.13721,((((V95RF-AJFE01017581.1-iglv:0.0,V133RF-AACZ03127143.1-iglv:0.0):0.01070,V65RF-CABD02231431.1-iglv:0.01033)0.943:0.07709,(V30RF-JZKE01249959.1-iglv:0.06751,((((((V230RF-AHZZ01105199.1-iglv:0.02221,V7RF-AQIA01007576.1-iglv:0.04143)0.812:0.02060,((V114RF-JABR01071856.1-iglv:0.04046,((V117RF-JABR01071856.1-iglv:0.00053,V227RF-JYKQ01126546.1-iglv:0.05205)0.936:0.03076,(V225RF-JYKQ01126546.1-iglv:0.04241,(V34RF-AQIA01009600.1-iglv:0.02028,V235RF-AHZZ01105201.1-iglv:0.01961)0.743:0.01042)0.876:0.02145)0.760:0.01084)0.687:0.00754,V231RF-AHZZ01105200.1-iglv:0.06926)0.308:0.00054)0.906:0.03297,(V13RF-AQIA01007576.1-iglv:0.00055,V271RF-AHZZ01198553.1-iglv:0.03173)0.923:0.03863)0.889:0.03445,((V173RF-ABGA01252219.1-iglv:0.00055,V174RF-ABGA01252219.1-iglv:0.00959)0.978:0.05196,((V172RF-ABGA01252218.1-iglv:0.08170,V62RF-CABD02231422.1-iglv:0.02186)0.817:0.04129,(V123RF-AACZ03127131.1-iglv:0.01873,(V88RF-AJFE01010827.1-iglv:0.01195,V91RF-AJFE01010828.1-iglv:0.02882)0.769:0.02708)0.790:0.03286)0.672:0.00055)0.802:0.01889)0.805:0.02087,V51RF-ADFV01126759.1-iglv:0.03364)0.934:0.05125,V101RF-AGCE01112648.1-iglv:0.07215)0.889:0.04483)0.917:0.06735)0.837:0.05262,((V270RF-AHZZ01198553.1-iglv:0.05539,(V122RF-AACZ03127129.1-iglv:0.00901,(V125RF-AACZ03127135.1-iglv:0.01017,V57RF-CABD02231415.1-iglv:0.04159)0.868:0.02173)0.846:0.02095)0.878:0.04099,(((V63RF-CABD02231427.1-iglv:0.02048,((V97RF-AJFE01017584.1-iglv:0.0,V129RF-AACZ03127139.1-iglv:0.0):0.02004,V170RF-ABGA01252215.1-iglv:0.02038)0.767:0.01015)0.847:0.02036,(V53RF-ADFV01126760.1-iglv:0.03913,(V219RF-JYKQ01126545.1-iglv:0.00055,(V267RF-AHZZ01198551.1-iglv:0.03148,(V2RF-AQIA01007574.1-iglv:0.00939,V106RF-JABR01071855.1-iglv:0.04062)0.764:0.01158)0.465:0.01278)0.883:0.03461)0.770:0.01622)0.787:0.01980,((V116RF-JABR01071856.1-iglv:0.04516,V73RF-AQIB01146137.1-iglv:0.02940)0.993:0.15423,((V92RF-AJFE01010829.1-iglv:0.0,V121RF-AACZ03127129.1-iglv:0.0):0.02046,V56RF-CABD02231410.1-iglv:0.00054)0.876:0.05754)0.946:0.08234)0.699:0.02573)0.919:0.07068)0.796:0.06283)0.979:0.19013,((V111RF-AJFE01022798.1-iglv:0.0,V195RF-AACZ03127321.1-iglv:0.0):0.48616,(V65RF-AQIB01146122.1-iglv:0.09950,((V191RF-AHZZ01089506.1-iglv:0.02264,((V16RF-AQIA01007586.1-iglv:0.01050,V62RF-AQIB01146122.1-iglv:0.01096)0.899:0.02152,V239RF-JYKQ01126581.1-iglv:0.00053)0.762:0.01048)0.523:0.01081,(((V248RF-JYKQ01126589.1-iglv:0.01112,(V19RF-JZKE01249933.1-iglv:0.02216,V82RF-JZKE01238800.1-iglv:0.02156)0.985:0.08020)0.789:0.01294,((V26RF-AQIA01007589.1-iglv:0.01240,V129RF-JABR01071862.1-iglv:0.03041)0.778:0.03092,(V105RF-AJFE01020631.1-iglv:0.03448,(V42RF-ADFV01126738.1-iglv:0.02290,V106RF-AJFE01020632.1-iglv:0.08075)0.808:0.03179)0.907:0.04021)0.539:0.00053)0.412:0.01862,(V200RF-AHZZ01089508.1-iglv:0.03237,(V21RF-AQIA01007587.1-iglv:0.00054,V242RF-JYKQ01126585.1-iglv:0.01070)0.995:0.08442)0.757:0.01889)0.890:0.04070)0.733:0.02375)0.959:0.25234)0.954:0.26524)0.452:0.07667)0.065:0.05734,(((V31RF-AQIA01007605.1-iglv:0.01016,(V5RF-JABR01043229.1-iglv:0.05597,(V30RF-AHZZ01097944.1-iglv:0.0,V82RF-JYKQ01114545.1-iglv:0.0):0.01969)0.767:0.01029)0.798:0.01040,(V115RF-AGCE01147939.1-iglv:0.06853,(V111RF-ABGA01335280.1-iglv:0.02836,((V112RF-AJFE01022798.1-iglv:0.0,V196RF-AACZ03127321.1-iglv:0.0):0.04184,V49RF-CABD02231299.1-iglv:0.00055)0.882:0.02426)0.877:0.03032)0.777:0.01495)0.390:0.00055,V135RF-JABR01077603.1-iglv:0.04165)1.000:0.50077)0.926:0.20938)0.977:0.34427,((((V86RF-ADFV01192042.1-trav:0.00998,V23RF-CABD02105615.1-trav:0.00054)1.000:1.59564,(((((V55RF-JYKQ01054925.1-trav:0.00054,(V59RF-ADFV01192035.1-trav:0.02261,V151RF-ABGA01113133.1-trav:0.04689)0.281:0.01132)0.986:0.24260,((V91RF-AGCE01026530.1-trav:0.00248,(V67RF-ADFV01192037.1-trav:0.02200,((V62RF-AJFE01069975.1-trav:0.0,V72RF-AACZ03097613.1-trav:0.0):0.01106,(V130RF-AQIA01064146.1-trav:0.01110,(V191RF-JABR01098600.1-trav:0.0,V217RF-AQIB01128644.1-trav:0.0):0.00055)0.892:0.02233)0.755:0.01099)0.856:0.03219)0.998:0.29375,((V60RF-JYKQ01054940.1-trav:0.02190,(V87RF-AHZZ01198216.1-trav:0.00054,(V126RF-AQIA01064144.1-trav:0.00055,((V66RF-ADFV01192037.1-trav:0.00054,(V148RF-ABGA01083939.1-trav:0.05594,V8RF-CABD02105586.1-trav:0.05164)0.786:0.01501)0.957:0.04378,V190RF-JABR01098600.1-trav:0.03315)0.852:0.02184)0.587:0.01101)0.883:0.02199)0.324:0.01564,(V70RF-ADFV01192038.1-trav:0.03320,(V142RF-ABGA01083934.1-trav:0.02181,(V65RF-AJFE01069975.1-trav:0.0,V75RF-AACZ03097614.1-trav:0.0):0.05629)0.000:0.00054)0.785:0.01757)0.831:0.09658)0.924:0.12936)0.908:0.22439,(((V132RF-ABDC01454736.1-trav:0.07755,((V73RF-ADFV01192039.1-trav:0.02199,(((V63RF-AHZZ01107545.1-trav:0.0,V67RF-JYKQ01054942.1-trav:0.0):0.00055,(V133RF-AQIA01064146.1-trav:0.00452,V220RF-AQIB01128644.1-trav:0.00881)0.929:0.00863)0.985:0.05743,(V127RF-ABGA01387833.1-trav:0.02249,((V68RF-AJFE01069976.1-trav:0.0,V78RF-AACZ03097618.1-trav:0.0):0.01073,V13RF-CABD02105590.1-trav:0.00054)0.408:0.02212)0.688:0.02219)0.419:0.00053)0.987:0.08406,V61RF-JZKE01143903.1-trav:0.02009)0.810:0.03124)0.867:0.05327,(V75RF-JZKE01143916.1-trav:0.11864,(((V63RF-ADFV01192035.1-trav:0.01060,V5RF-CABD02105579.1-trav:0.00055)0.828:0.01064,((V59RF-AJFE01069975.1-trav:0.01042,V69RF-AACZ03097613.1-trav:0.00055)0.913:0.02134,V145RF-ABGA01083939.1-trav:0.00055)0.000:0.00055)0.638:0.00203,(V98RF-AGCE01026534.1-trav:0.15524,(V201RF-JABR01098604.1-trav:0.04289,(V123RF-AQIA01064138.1-trav:0.02146,(V213RF-AQIB01128644.1-trav:0.0,V57RF-JYKQ01054940.1-trav:0.0):0.02114)0.669:0.00054)0.770:0.01080)0.730:0.01923)0.965:0.11143)0.909:0.08255)0.962:0.23598,(V49RF-JZKE01143890.1-trav:0.13606,(V87RF-AGCE01026527.1-trav:0.04547,(V103RF-ABDC01533415.1-trav:0.18322,(V77RF-ADFV01192039.1-trav:0.03090,(((((V137RF-AQIA01064149.1-trav:0.0,V71RF-JYKQ01054957.1-trav:0.0):0.00055,V35RF-AHZZ01098200.1-trav:0.02232)0.000:0.00055,V207RF-AQIB01128643.1-trav:0.01084)0.926:0.03103,V185RF-JABR01098598.1-trav:0.01642)0.792:0.01832,V122RF-ABGA01386446.1-trav:0.02199)0.779:0.01470)0.754:0.01041)0.437:0.01046)0.968:0.20013)0.961:0.21243)0.814:0.23154)0.988:0.66150,(V148RF-ADFV01192057.1-trdv:0.01757,((V26RF-AJFE01024273.1-trdv:0.0,V187RF-AACZ03095321.1-trdv:0.0):0.01085,V112RF-CABD02105639.1-trdv:0.01095)0.684:0.02647)0.997:0.97742)0.205:0.12221,((V35RF-JZKE01143868.1-trav:0.05281,((((V226RF-ABGA01321072.1-trdv:0.01967,(V59RF-AACZ03095317.1-trdv:0.00055,V27RF-CABD02105626.1-trdv:0.00990)0.000:0.00054)0.705:0.01970,(V150RF-AQIA01064166.1-trdv:0.01974,(((V121RF-JYKQ01135388.1-trav:0.00053,(V151RF-AQIA01064166.1-trav:0.00054,V3RF-AHZZ01035404.1-trav:0.00973)0.507:0.01939)0.776:0.00965,V198RF-AQIB01128637.1-trav:0.04097)0.443:0.01960,((V2RF-AHZZ01035404.1-trdv:0.00986,V120RF-JYKQ01135385.1-trdv:0.00992)0.000:0.00055,V197RF-AQIB01128637.1-trdv:0.02983)0.865:0.00973)0.996:0.00054)0.000:0.00053)0.915:0.01917,V172RF-JABR01098592.1-trdv:0.00984)0.775:0.00054,((V79RF-AGCE01026520.1-trdv:0.07156,(V93RF-ADFV01192049.1-trav:0.01017,(V171RF-JABR01098590.1-trav:0.02015,(V60RF-AACZ03095317.1-trav:0.00967,(V116RF-AJFE01024276.1-trav:0.00055,(V225RF-ABGA01321070.1-trav:0.0,V28RF-CABD02105626.1-trav:0.0):0.00055)0.000:0.00055)0.768:0.00985)0.749:0.00976)0.761:0.01014)0.858:0.01948,V78RF-AGCE01026520.1-trdv:0.03088)0.929:0.02963)0.557:0.01835)0.982:0.17873,((((V47RF-JZKE01143874.1-trdv:0.10412,(V95RF-ABDC01497734.1-trdv:0.30455,V45RF-JZKE01143873.1-trdv:0.13969)0.650:0.01029)0.998:0.17146,(V20RF-CABD02105611.1-trdv:0.03908,(V86RF-AACZ03097622.1-trdv:0.02945,V210RF-AACZ03179105.1-trdv:0.00294)0.765:0.01467)0.871:0.03793)0.876:0.06002,V167RF-JYKQ01026663.1-trav:0.03616)1.000:0.32058,(((V54RF-JZKE01143895.1-trav:0.03000,(V58RF-JZKE01143896.1-trav:0.04729,(V65RF-JZKE01143910.1-trav:0.05594,(V219RF-AQIB01128644.1-trav:0.01065,((V66RF-JYKQ01054942.1-trav:0.00054,(V132RF-AQIA01064146.1-trav:0.00055,V62RF-AHZZ01107545.1-trav:0.01022)0.929:0.02058)0.927:0.02120,((V72RF-ADFV01192039.1-trav:0.03431,(V126RF-ABGA01387831.1-trav:0.03076,(V77RF-AACZ03097618.1-trav:0.01001,((V67RF-AJFE01069976.1-trav:0.0,V202RF-AACZ03171512.1-trav:0.0):0.02090,V12RF-CABD02105589.1-trav:0.02061)1.000:0.00054)0.700:0.02061)0.715:0.00952)0.957:0.04921,V193RF-JABR01098600.1-trav:0.04912)0.356:0.00111)0.697:0.00138)1.000:0.13849)0.430:0.02652)0.769:0.01492)0.888:0.03399,V49RF-ABDC01379531.1-trav:0.01583)0.898:0.07966,(V51RF-JZKE01143891.1-trav:0.08820,(V88RF-AGCE01026527.1-trdv:0.08197,(((V72RF-AJFE01069976.1-trdv:0.0,V82RF-AACZ03097619.1-trdv:0.0):0.00974,V16RF-CABD02105598.1-trdv:0.02987)0.944:0.03246,(V123RF-ABGA01386446.1-trdv:0.05953,(V78RF-ADFV01192039.1-trdv:0.03921,(V208RF-AQIB01128643.1-trav:0.00945,(V186RF-JABR01098598.1-trav:0.02916,(V36RF-AHZZ01098200.1-trav:0.04937,(V138RF-AQIA01064149.1-trav:0.00969,V72RF-JYKQ01054957.1-trav:0.00978)0.702:0.00628)0.752:0.01385)0.780:0.00982)0.794:0.00991)0.751:0.00940)0.732:0.00728)0.817:0.03064)0.943:0.07820)0.991:0.18399)0.619:0.06831)0.815:0.04494)0.920:0.23873)0.805:0.18335)0.575:0.06963,(((V53RF-ABDC01388284.1-trav:0.11855,((((V69RF-ADFV01192038.1-trav:0.04045,(V10RF-CABD02105588.1-trav:0.00054,(V64RF-AJFE01069975.1-trav:0.00055,V74RF-AACZ03097614.1-trav:0.02191)0.842:0.01094)0.684:0.00586)0.837:0.02718,(V62RF-JYKQ01054942.1-trav:0.00054,(V189RF-JABR01098600.1-trav:0.05739,(V93RF-AGCE01026530.1-trav:0.07753,(V128RF-AQIA01064146.1-trav:0.02249,V59RF-AHZZ01107544.1-trav:0.01132)0.428:0.01133)0.108:0.00054)0.784:0.01052)0.963:0.06257)0.949:0.06295,((V95RF-AGCE01026531.1-trav:0.02669,((V147RF-ABGA01083939.1-trav:0.01121,(V65RF-ADFV01192037.1-trav:0.02292,((V61RF-AJFE01069975.1-trav:0.0,V71RF-AACZ03097613.1-trav:0.0):0.01134,V7RF-CABD02105584.1-trav:0.00055)0.000:0.00055)0.803:0.01136)0.778:0.01194,((V125RF-AQIA01064144.1-trav:0.0,V196RF-JABR01098603.1-trav:0.0):0.00054,(V86RF-AHZZ01198216.1-trav:0.00055,V59RF-JYKQ01054940.1-trav:0.00984)0.913:0.00956)0.842:0.02060)0.452:0.03122)0.996:0.15089,(V89RF-AGCE01026529.1-trav:0.07647,((V74RF-ADFV01192039.1-trav:0.03342,(V14RF-CABD02105592.1-trav:0.01098,(V79RF-AACZ03097619.1-trav:0.01100,V69RF-AJFE01069976.1-trav:0.02212)0.000:0.00053)0.769:0.01099)0.774:0.01108,(V128RF-ABGA01387833.1-trav:0.05670,((V215RF-AQIB01128644.1-trav:0.01098,((V134RF-AQIA01064146.1-trav:0.0,V221RF-AQIB01128644.1-trav:0.0):0.00055,V68RF-JYKQ01054942.1-trav:0.01091)0.000:0.00055)0.743:0.00054,(V32RF-AHZZ01098200.1-trav:0.02201,V187RF-JABR01098599.1-trav:0.02213)0.804:0.01106)0.930:0.03344)0.741:0.01074)0.884:0.04025)0.971:0.09399)0.526:0.01425)0.986:0.10013,((V50RF-ABDC01379531.1-trav:0.0,V93RF-ABDC01491653.1-trav:0.0):0.09468,(V60RF-JZKE01143902.1-trav:0.01251,(V59RF-JZKE01143896.1-trav:0.02727,V55RF-JZKE01143895.1-trav:0.05710)0.423:0.00054)0.830:0.01996)0.728:0.01228)0.811:0.04296)0.993:0.36094,(((V68RF-JZKE01143915.1-trav:0.11660,(((V192RF-JABR01098600.1-trav:0.01028,(V131RF-AQIA01064146.1-trav:0.02095,((V61RF-AHZZ01107544.1-trav:0.0,V218RF-AQIB01128644.1-trav:0.0):0.00055,V65RF-JYKQ01054942.1-trav:0.01043)0.000:0.00055)0.883:0.02167)0.922:0.04578,(V71RF-ADFV01192038.1-trav:0.02101,(V141RF-ABGA01083932.1-trav:0.04232,(V66RF-AJFE01069976.1-trav:0.00055,V11RF-CABD02105589.1-trav:0.01031)0.947:0.02089)0.880:0.00054)0.742:0.02144)0.995:0.13397,(V73RF-ABDC01418428.1-trav:0.15124,(V57RF-JZKE01143896.1-trav:0.17594,V53RF-JZKE01143895.1-trav:0.02168)0.534:0.03504)0.810:0.02372)0.943:0.06652)0.470:0.02017,(V92RF-AGCE01026530.1-trav:0.10847,((V63RF-AJFE01069975.1-trav:0.00055,V73RF-AACZ03097614.1-trav:0.01070)0.981:0.05584,(V143RF-ABGA01083937.1-trav:0.02130,(V58RF-AHZZ01107544.1-trav:0.01037,(V127RF-AQIA01064146.1-trav:0.01052,(V195RF-JABR01098601.1-trav:0.02111,V61RF-JYKQ01054942.1-trav:0.01056)0.788:0.01061)1.000:0.00054)0.889:0.02214)0.073:0.00985)0.907:0.04173)0.931:0.06062)0.956:0.16516,((V46RF-ABDC01377653.1-trav:0.12105,V73RF-JZKE01143916.1-trav:0.02309)0.791:0.09724,(V97RF-AGCE01026534.1-trav:0.17340,(V3RF-CABD02105570.1-trav:0.02162,(V150RF-ABGA01113130.1-trav:0.03321,((V55RF-AJFE01069975.1-trav:0.01068,V66RF-AACZ03097612.1-trav:0.00054)0.451:0.00055,(V60RF-ADFV01192035.1-trav:0.02211,((V198RF-JABR01098604.1-trav:0.00054,V211RF-AQIB01128644.1-trav:0.02183)0.828:0.00054,(V121RF-AQIA01064137.1-trav:0.01099,(V83RF-AHZZ01198213.1-trav:0.00055,V56RF-JYKQ01054933.1-trav:0.01080)0.928:0.03274)0.394:0.01086)0.925:0.03376)0.787:0.01042)0.180:0.01072)0.746:0.01053)0.431:0.01381)0.980:0.14281)0.811:0.07617)0.982:0.27759)0.466:0.11592,(((((V91RF-ADFV01192045.1-trav:0.04705,(V207RF-AHZZ01093946.1-trav:0.07554,((V115RF-AJFE01024276.1-trav:0.0,V58RF-AACZ03095314.1-trav:0.0):0.00055,V201RF-AACZ03171149.1-trav:0.04358)0.792:0.01069)0.000:0.00569)0.892:0.09753,(V104RF-ABDC01542818.1-trav:0.08863,V37RF-JZKE01143869.1-trav:0.00924)0.848:0.06955)0.999:0.50262,((((V73RF-AJFE01069977.1-trav:0.0,V17RF-CABD02105602.1-trav:0.0):0.00054,V83RF-AACZ03097619.1-trav:0.01164)0.752:0.01385,(V73RF-JYKQ01054957.1-trav:0.03573,((V139RF-AQIA01064151.1-trav:0.0,V205RF-AQIB01128642.1-trav:0.0):0.00055,V37RF-AHZZ01098200.1-trav:0.01166)0.656:0.00641)0.358:0.01552)0.991:0.33771,(V200RF-JABR01098604.1-trav:0.01953,(V62RF-ADFV01192035.1-trav:0.03271,(V57RF-AJFE01069975.1-trav:0.01076,V68RF-AACZ03097613.1-trav:0.00055)0.747:0.01064)0.833:0.04748)1.000:0.48342)0.629:0.02826)0.827:0.06293,(V87RF-AJFE01010527.1-trav:0.57386,(V4RF-AHZZ01035404.1-trav:0.00055,((V152RF-AQIA01064166.1-trav:0.0,V122RF-JYKQ01135389.1-trav:0.0):0.00054,(V93RF-JABR01039937.1-trav:0.04606,((V94RF-ADFV01192050.1-trav:0.03481,(V224RF-ABGA01321068.1-trav:0.00054,((V117RF-AJFE01024276.1-trav:0.01132,V61RF-AACZ03095319.1-trav:0.00055)0.920:0.02295,V29RF-CABD02105628.1-trav:0.02281)0.817:0.00054)0.579:0.00055)0.951:0.03471,V194RF-AQIB01128636.1-trav:0.02288)0.000:0.00053)0.850:0.01140)0.812:0.01110)0.999:0.51832)0.700:0.03780)0.808:0.06447,(((V62RF-JZKE01143910.1-trav:0.06745,((V70RF-AACZ03097613.1-trav:0.00055,(V60RF-AJFE01069975.1-trav:0.01002,(V146RF-ABGA01083939.1-trav:0.01001,V6RF-CABD02105581.1-trav:0.01003)0.000:0.00055)0.000:0.00054)0.543:0.00054,((V202RF-JABR01098604.1-trav:0.01847,(((V124RF-AQIA01064138.1-trav:0.0,V85RF-AHZZ01198214.1-trav:0.0):0.00055,V214RF-AQIB01128644.1-trav:0.03030)0.812:0.01001,V58RF-JYKQ01054940.1-trav:0.01002)0.714:0.00473)0.801:0.01696,V64RF-ADFV01192037.1-trav:0.02084)0.798:0.00994)0.888:0.09803)0.999:0.44903,((V82RF-AGCE01026522.1-trav:0.03297,V18RF-CABD02105602.1-trav:0.02808)0.999:0.47549,((V52RF-JZKE01143893.1-trav:0.10755,(V86RF-AGCE01026527.1-trav:0.15714,((V184RF-JABR01098598.1-trav:0.03041,(V136RF-AQIA01064148.1-trav:0.00996,(V222RF-AQIB01128644.1-trav:0.01999,(V34RF-AHZZ01098200.1-trav:0.01004,V70RF-JYKQ01054953.1-trav:0.00055)0.000:0.00054)0.847:0.00998)0.902:0.00053)0.894:0.02097,(((V71RF-AJFE01069976.1-trav:0.0,V81RF-AACZ03097619.1-trav:0.0):0.01012,(V121RF-ABGA01386446.1-trav:0.0,V15RF-CABD02105596.1-trav:0.0):0.00054)0.802:0.00832,V76RF-ADFV01192039.1-trav:0.07337)0.769:0.01145)0.762:0.03535)0.605:0.06462)0.985:0.18028,(V74RF-JZKE01143916.1-trav:0.13157,((V56RF-AJFE01069975.1-trav:0.0,V67RF-AACZ03097613.1-trav:0.0,V167RF-AACZ03171395.1-trav:0.0):0.02186,(V61RF-ADFV01192035.1-trav:0.01118,V149RF-ABGA01113129.1-trav:0.03333)0.228:0.00054)0.969:0.13390)0.991:0.27549)0.853:0.10489)0.175:0.08845)0.788:0.10118,(V56RF-AACZ03095312.1-trav:0.59031,(V145RF-AQIA01064165.1-trav:0.02111,V208RF-AHZZ01093949.1-trav:0.00786)0.996:0.55868)0.963:0.37924)0.811:0.07506)0.845:0.16837)0.962:0.32822)0.932:0.23562,((((V116RF-AQIA01048536.1-trbv:0.0,V191RF-AQIB01162321.1-trbv:0.0):0.00054,((((V81RF-AJFE01104369.1-trbv:0.0,V54RF-AACZ03067007.1-trbv:0.0):0.01982,V111RF-CABD02377030.1-trbv:0.02993)0.849:0.02524,(V128RF-AJFE01070459.1-trbv:0.01965,V46RF-ABGA01091263.1-trbv:0.02398)0.734:0.01490)0.877:0.02580,V119RF-JYKQ01131111.1-trbv:0.02001)0.767:0.00975)0.899:0.02980,V77RF-JABR01196792.1-trbv:0.00054)1.000:1.31894,(((V109RF-AQIA01048536.1-trbv:0.00054,((V184RF-AQIB01162321.1-trbv:0.02115,V112RF-JYKQ01131104.1-trbv:0.02066)0.764:0.01040,(V141RF-AHZZ01067649.1-trbv:0.02074,(V41RF-ABGA01091252.1-trbv:0.01081,((V130RF-AJFE01070460.1-trbv:0.0,V101RF-CABD02352526.1-trbv:0.0):0.00055,V43RF-AACZ03053991.1-trbv:0.01048)0.776:0.01036)0.938:0.03153)0.000:0.00054)0.901:0.02069)0.999:0.40504,((((V106RF-CABD02352531.1-trbv:0.00999,((V48RF-AACZ03053994.1-trbv:0.03136,V164RF-ABGA01225869.1-trbv:0.02180)0.394:0.00054,V189RF-AQIB01162321.1-trbv:0.05473)0.788:0.01041)0.293:0.01090,V29RF-ADFV01062084.1-trbv:0.00055)0.998:0.29574,(V0RF-JZKE01005121.1-trbv:0.21397,(((V68RF-JABR01092448.1-trbv:0.01985,(V129RF-AHZZ01067647.1-trbv:0.00053,(V190RF-AQIB01162321.1-trbv:0.02009,(V115RF-AQIA01048536.1-trbv:0.00055,V118RF-JYKQ01131110.1-trbv:0.01001)0.145:0.00055)0.870:0.01003)0.758:0.01000)0.962:0.04360,(V49RF-AACZ03053994.1-trbv:0.00055,(V127RF-AJFE01070459.1-trbv:0.01034,V107RF-CABD02352532.1-trbv:0.01048)0.821:0.01060)0.783:0.01143)0.837:0.02095,V30RF-ADFV01062084.1-trbv:0.00053)0.949:0.12058)0.985:0.19837)0.759:0.04821,(((V44RF-ABGA01091257.1-trbv:0.03303,V104RF-CABD02352529.1-trbv:0.00055)0.504:0.00133,(V187RF-AQIB01162321.1-trbv:0.02163,(V65RF-JABR01092448.1-trbv:0.02124,(V144RF-AHZZ01067649.1-trbv:0.04222,(V112RF-AQIA01048536.1-trbv:0.01033,V115RF-JYKQ01131107.1-trbv:0.00055)1.000:0.00054)0.799:0.01022)0.762:0.01040)0.791:0.03118)0.993:0.29449,(((V45RF-ABGA01091260.1-trbv:0.00054,((V188RF-AQIB01162321.1-trbv:0.01051,(V66RF-JABR01092448.1-trbv:0.00055,(V131RF-AHZZ01067648.1-trbv:0.01050,V113RF-AQIA01048536.1-trbv:0.03210)0.000:0.00055)0.000:0.00054)0.901:0.03157,((V80RF-AJFE01104359.1-trbv:0.0,V53RF-AACZ03067000.1-trbv:0.0):0.01093,V110RF-CABD02377005.1-trbv:0.02226)0.999:0.18458)0.888:0.03246)0.161:0.02112,(V125RF-AJFE01070459.1-trbv:0.00055,(V47RF-AACZ03053992.1-trbv:0.01065,V28RF-ADFV01062082.1-trbv:0.01061)0.000:0.00054)0.682:0.00054)0.999:0.37179,(((V77RF-JZKE01196378.1-trbv:0.08551,V110RF-JZKE01294668.1-trbv:0.10388)0.857:0.03566,(V133RF-ABDC01455982.1-trbv:0.23761,((V9RF-AGCE01061998.1-trbv:0.08151,V11RF-AGCE01062000.1-trbv:0.10863)0.981:0.07727,(V19RF-AGCE01062009.1-trbv:0.11918,(((V105RF-JYKQ01131101.1-trbv:0.01084,(V101RF-AQIA01048532.1-trbv:0.01099,V133RF-AHZZ01067649.1-trbv:0.01079)0.859:0.01076)0.990:0.00055,(V144RF-JABR01088213.1-trbv:0.02189,V176RF-AQIB01162320.1-trbv:0.01097)0.463:0.01085)0.906:0.04774,(V20RF-ADFV01062075.1-trbv:0.03583,(V35RF-AACZ03053988.1-trbv:0.02218,V94RF-CABD02352513.1-trbv:0.01103)0.822:0.02344)0.448:0.01314)0.812:0.02860)0.915:0.06767)0.737:0.02357)0.400:0.03675)0.947:0.12011,((V163RF-AJFE01070464.1-trbv:0.0,V14RF-AACZ03053981.1-trbv:0.0):0.27446,(V124RF-ABDC01368601.1-trbv:0.22958,((((((((((V151RF-JABR01088214.1-trbv:0.04411,((V151RF-AHZZ01067651.1-trbv:0.02275,V173RF-AQIB01162320.1-trbv:0.03384)0.294:0.01110,(V98RF-AQIA01048532.1-trbv:0.04594,V101RF-JYKQ01131096.1-trbv:0.00053)0.893:0.00054)0.830:0.02264)0.969:0.06082,(V165RF-AQIB01162318.1-trbv:0.00055,(V93RF-JYKQ01131092.1-trbv:0.05905,(V90RF-AQIA01048530.1-trbv:0.02277,V160RF-AHZZ01067652.1-trbv:0.03649)0.737:0.01388)0.872:0.03621)0.932:0.03869)0.833:0.02102,((V27RF-AACZ03053987.1-trbv:0.00054,V88RF-CABD02352510.1-trbv:0.03418)0.980:0.06903,V163RF-ABGA01223433.1-trbv:0.02217)0.839:0.02118)0.540:0.01100,(V101RF-ABGA01301086.1-trbv:0.05490,(V155RF-AJFE01070463.1-trbv:0.0,V30RF-AACZ03053988.1-trbv:0.0):0.06784)0.873:0.00055)0.937:0.02077,(V99RF-ABGA01301083.1-trbv:0.08518,(V147RF-AJFE01070463.1-trbv:0.00055,V24RF-AACZ03053983.1-trbv:0.01116)0.748:0.01032)0.964:0.06419)0.021:0.00053,(V157RF-JABR01088215.1-trbv:0.03357,((V144RF-AJFE01070463.1-trbv:0.02239,V21RF-AACZ03053983.1-trbv:0.01158)0.900:0.02253,V81RF-CABD02352501.1-trbv:0.01081)1.000:0.00054)0.854:0.00054)0.769:0.01122,(((V147RF-AHZZ01067651.1-trbv:0.0,V96RF-JYKQ01131093.1-trbv:0.0):0.08040,V99RF-JYKQ01131094.1-trbv:0.04901)0.570:0.02161,V94RF-AQIA01048530.1-trbv:0.05518)0.640:0.02666)0.737:0.01289,V13RF-AGCE01062002.1-trbv:0.16419)0.822:0.01931,(V86RF-AQIA01048530.1-trbv:0.01273,(V86RF-JYKQ01131090.1-trbv:0.01120,(V161RF-AQIB01162317.1-trbv:0.04671,V154RF-AHZZ01067652.1-trbv:0.00055)0.000:0.00054)0.795:0.02156)0.843:0.02198)0.688:0.00837,(((V7RF-ADFV01062069.1-trbv:0.00053,(V69RF-CABD02352482.1-trbv:0.04389,(V36RF-AJFE01039608.1-trbv:0.0,V7RF-AACZ03053974.1-trbv:0.0):0.00054)0.987:0.04322)0.775:0.00054,((((((V73RF-CABD02352493.1-trbv:0.04499,(V164RF-AJFE01070465.1-trbv:0.00055,V9RF-AACZ03053976.1-trbv:0.01089)0.874:0.02210)0.836:0.02119,((V172RF-AHZZ01067655.1-trbv:0.0,V33RF-JYKQ01029809.1-trbv:0.0):0.01281,(V153RF-AQIB01162312.1-trbv:0.07700,(V78RF-AQIA01048526.1-trbv:0.00055,V171RF-AHZZ01067655.1-trbv:0.02160)0.709:0.00162)0.961:0.06776)0.984:0.07718)0.781:0.01468,(V11RF-ADFV01062071.1-trbv:0.03187,V168RF-JABR01088216.1-trbv:0.07860)0.744:0.01242)0.310:0.00055,(V207RF-ABGA01277810.1-trbv:0.05808,(V210RF-ABGA01277815.1-trbv:0.05398,(V206RF-ABGA01277809.1-trbv:0.03248,((V162RF-AJFE01070464.1-trbv:0.0,V12RF-AACZ03053977.1-trbv:0.0):0.02288,V70RF-CABD02352488.1-trbv:0.01115)0.864:0.02714)0.931:0.05161)0.819:0.02092)0.750:0.01136)0.821:0.01078,V208RF-ABGA01277810.1-trbv:0.07959)0.841:0.00055,(V8RF-ADFV01062071.1-trbv:0.06388,(V164RF-JABR01088216.1-trbv:0.01484,(V150RF-AQIB01162312.1-trbv:0.02077,(V75RF-AQIA01048526.1-trbv:0.01034,(V177RF-AHZZ01067656.1-trbv:0.01040,V30RF-JYKQ01029809.1-trbv:0.01034)0.791:0.01031)0.766:0.01051)0.911:0.04945)0.991:0.09228)0.406:0.01863)0.893:0.02073)0.949:0.05739,(V0RF-AGCE01061995.1-trbv:0.03918,V4RF-AGCE01061995.1-trbv:0.05430)0.910:0.03738)0.369:0.00053)0.887:0.07340)0.248:0.02656)0.956:0.17990)0.930:0.13941)0.549:0.08442)0.587:0.10161)0.881:0.11575)0.972:0.32299,((((V37RF-JYKQ01029811.1-trbv:0.01116,(((V165RF-AHZZ01067653.1-trbv:0.00055,V82RF-AQIA01048528.1-trbv:0.03369)0.830:0.01073,(V153RF-JABR01088215.1-trbv:0.01047,V157RF-AQIB01162313.1-trbv:0.01060)1.000:0.00050)0.378:0.00054,(V17RF-AACZ03053981.1-trbv:0.01072,(V201RF-ABGA01277802.1-trbv:0.01071,V78RF-CABD02352499.1-trbv:0.02163)0.784:0.01076)0.976:0.04393)0.754:0.01038)0.989:0.19349,((V116RF-JZKE01294669.1-trbv:0.09062,(V18RF-AGCE01062008.1-trbv:0.04690,((V159RF-AJFE01070463.1-trbv:0.0,V34RF-AACZ03053988.1-trbv:0.0):0.02156,V93RF-CABD02352512.1-trbv:0.00055)0.978:0.07720)0.925:0.08303)0.982:0.20495,((V6RF-ADFV01062069.1-trbv:0.00054,(V35RF-AJFE01039607.1-trbv:0.0,V6RF-AACZ03053974.1-trbv:0.0):0.05712)0.971:0.15815,(V152RF-JABR01088215.1-trbv:0.16125,((((V22RF-ADFV01062076.1-trbv:0.02325,(((V148RF-AJFE01070463.1-trbv:0.01079,V100RF-ABGA01301086.1-trbv:0.00055)0.942:0.00054,V84RF-CABD02352508.1-trbv:0.03322)0.895:0.02158,((V154RF-AJFE01070463.1-trbv:0.00054,V29RF-AACZ03053988.1-trbv:0.01079)0.873:0.01075,V25RF-AACZ03053984.1-trbv:0.01070)0.000:0.00055)0.834:0.02089)0.214:0.01158,((V97RF-AQIA01048532.1-trbv:0.01075,V150RF-AHZZ01067651.1-trbv:0.00055)0.757:0.01054,(V98RF-JYKQ01131094.1-trbv:0.02211,(V172RF-AQIB01162320.1-trbv:0.01095,V100RF-JYKQ01131095.1-trbv:0.01093)0.784:0.01112)0.868:0.02274)0.644:0.02139)0.000:0.00054,((V151RF-AJFE01070463.1-trbv:0.05144,V87RF-CABD02352509.1-trbv:0.01377)0.827:0.03537,(V142RF-JABR01088213.1-trbv:0.08587,(V17RF-ADFV01062075.1-trbv:0.04893,(V23RF-AACZ03053983.1-trbv:0.03180,(V146RF-AJFE01070463.1-trbv:0.00054,V83RF-CABD02352503.1-trbv:0.01051)0.968:0.00055)0.329:0.02793)0.740:0.05814)0.330:0.04037)0.904:0.05291)0.833:0.02647,((V93RF-AQIA01048530.1-trbv:0.00055,V146RF-AHZZ01067651.1-trbv:0.02133)0.971:0.07502,(V163RF-AQIB01162317.1-trbv:0.06742,(V16RF-ADFV01062075.1-trbv:0.07797,(V157RF-AJFE01070463.1-trbv:0.0,V32RF-AACZ03053988.1-trbv:0.0):0.04343)0.890:0.04434)0.924:0.05715)0.856:0.02496)0.890:0.07411)0.548:0.07993)0.957:0.14146)0.763:0.03615)0.965:0.33050,((V100RF-CABD02352525.1-trbv:0.39743,((V140RF-AHZZ01067649.1-trbv:0.03516,(V25RF-ADFV01062079.1-trbv:0.03065,((V135RF-AJFE01070461.1-trbv:0.0,V41RF-AACZ03053991.1-trbv:0.0):0.01391,V39RF-ABGA01091249.1-trbv:0.01889)0.877:0.02570)0.739:0.01573)0.997:0.24866,((V136RF-ABDC01473376.1-trbv:0.27938,(((V132RF-AJFE01070460.1-trbv:0.01043,V45RF-AACZ03053992.1-trbv:0.00055)0.836:0.01041,(V103RF-CABD02352526.1-trbv:0.01038,V43RF-ABGA01091257.1-trbv:0.03134)0.000:0.00053)0.879:0.03284,(V64RF-JABR01092448.1-trbv:0.01029,(V114RF-JYKQ01131105.1-trbv:0.03994,V186RF-AQIB01162321.1-trbv:0.00054)0.877:0.02113)0.878:0.03372)0.966:0.13831)0.981:0.19289,(V142RF-ABDC01560090.1-trbv:0.12554,(V108RF-CABD02377004.1-trbv:0.05657,V185RF-AQIB01162321.1-trbv:0.04393)0.942:0.10545)0.977:0.17639)0.678:0.08648)0.947:0.16975)0.921:0.13735,(((V20RF-AGCE01062009.1-trbv:0.09331,(V107RF-JYKQ01131102.1-trbv:0.02409,(V34RF-ABGA01091248.1-trbv:0.05192,((V137RF-AJFE01070462.1-trbv:0.0,V37RF-AACZ03053989.1-trbv:0.0):0.00054,(V97RF-CABD02352515.1-trbv:0.01036,V96RF-CABD02352514.1-trbv:0.00055)0.841:0.01041)0.796:0.03330)0.826:0.05991)0.737:0.05200)0.994:0.20466,(((V141RF-AJFE01070463.1-trbv:0.00055,V18RF-AACZ03053981.1-trbv:0.01054)0.905:0.05860,(V20RF-AACZ03053983.1-trbv:0.07424,(V21RF-ADFV01062075.1-trbv:0.0,V95RF-CABD02352514.1-trbv:0.0):0.14005)0.800:0.03216)0.995:0.26515,(((V76RF-CABD02352499.1-trbv:0.00053,(V138RF-AJFE01070463.1-trbv:0.01124,V15RF-AACZ03053981.1-trbv:0.00054)0.754:0.02212)0.965:0.06794,((((V79RF-AQIA01048527.1-trbv:0.0,V173RF-AHZZ01067655.1-trbv:0.0,V34RF-JYKQ01029809.1-trbv:0.0):0.00053,V154RF-AQIB01162312.1-trbv:0.06946)0.974:0.07949,(V204RF-ABGA01277808.1-trbv:0.05441,(V74RF-CABD02352494.1-trbv:0.06654,V13RF-AACZ03053979.1-trbv:0.01069)0.749:0.01119)0.898:0.03880)0.923:0.05422,(V80RF-AQIA01048527.1-trbv:0.01105,((V155RF-AQIB01162313.1-trbv:0.05716,V35RF-JYKQ01029811.1-trbv:0.02253)0.771:0.01107,(V163RF-AHZZ01067653.1-trbv:0.04350,V206RF-JABR01184607.1-trbv:0.08337)0.641:0.00172)0.766:0.01096)0.989:0.08479)0.530:0.01190)0.963:0.11863,((V17RF-AGCE01062008.1-trbv:0.05553,((((V91RF-CABD02352511.1-trbv:0.0,V92RF-CABD02352512.1-trbv:0.0):0.00966,(V158RF-AJFE01070463.1-trbv:0.00055,V33RF-AACZ03053988.1-trbv:0.01051)0.950:0.03297)0.901:0.02322,(V196RF-ABGA01259417.1-trbv:0.01144,(V132RF-AHZZ01067649.1-trbv:0.01038,(V100RF-AQIA01048532.1-trbv:0.00055,V104RF-JYKQ01131101.1-trbv:0.02097)0.000:0.00055)1.000:0.13615)0.887:0.02204)0.799:0.01779,V18RF-ADFV01062075.1-trbv:0.05702)0.958:0.05737)0.926:0.07503,((V96RF-ABGA01301078.1-trbv:0.05698,((V155RF-AHZZ01067652.1-trbv:0.01269,(V87RF-AQIA01048530.1-trbv:0.02395,V87RF-JYKQ01131090.1-trbv:0.02058)0.283:0.01100)0.880:0.02560,((V95RF-AQIA01048531.1-trbv:0.02211,V97RF-JYKQ01131094.1-trbv:0.01115)0.868:0.02696,V147RF-JABR01088214.1-trbv:0.06454)0.240:0.02056)0.775:0.01456)0.863:0.03451,(((((V145RF-AJFE01070463.1-trbv:0.0,V22RF-AACZ03053983.1-trbv:0.0,V82RF-CABD02352502.1-trbv:0.0):0.05329,V63RF-ABGA01129113.1-trbv:0.04778)0.979:0.09387,V15RF-ADFV01062075.1-trbv:0.05509)0.711:0.02630,((V162RF-JABR01088215.1-trbv:0.06120,((V92RF-AQIA01048530.1-trbv:0.03153,V145RF-AHZZ01067651.1-trbv:0.01333)0.262:0.02296,(((V153RF-AJFE01070463.1-trbv:0.01077,(V89RF-CABD02352511.1-trbv:0.00055,V28RF-AACZ03053988.1-trbv:0.01070)0.000:0.00054)0.448:0.02191,(V150RF-AJFE01070463.1-trbv:0.01081,V26RF-AACZ03053986.1-trbv:0.01091)0.743:0.01096)0.924:0.03494,(((V102RF-JYKQ01131098.1-trbv:0.02214,V152RF-AHZZ01067651.1-trbv:0.00054)0.886:0.01812,(V99RF-AQIA01048532.1-trbv:0.00055,V174RF-AQIB01162320.1-trbv:0.03384)0.667:0.00450)0.897:0.03250,V0RF-JABR01013263.1-trbv:0.06816)0.749:0.01050)0.881:0.03532)0.658:0.02583)0.138:0.00053,(V91RF-AQIA01048530.1-trbv:0.01515,V161RF-AHZZ01067652.1-trbv:0.04632)0.924:0.04016)0.846:0.02660)0.904:0.03471,((V102RF-ABGA01301086.1-trbv:0.06791,(V156RF-AJFE01070463.1-trbv:0.01072,V31RF-AACZ03053988.1-trbv:0.00055)0.773:0.01043)0.930:0.03475,(V158RF-AHZZ01067652.1-trbv:0.00054,(V164RF-AQIB01162317.1-trbv:0.03307,V90RF-JYKQ01131090.1-trbv:0.01081)0.930:0.03322)0.917:0.04257)0.762:0.01108)0.690:0.00671)0.908:0.06666)0.863:0.08582)0.933:0.10173)0.900:0.09808)0.598:0.03984,((V138RF-AHZZ01067649.1-trbv:0.02234,(V21RF-AGCE01062009.1-trbv:0.10879,(V134RF-AJFE01070461.1-trbv:0.00103,(V39RF-AACZ03053991.1-trbv:0.02062,V98RF-CABD02352520.1-trbv:0.00055)0.870:0.02038)0.982:0.08243)0.376:0.01319)0.999:0.32563,(V116RF-ABDC01281097.1-trbv:0.10012,(V73RF-JABR01095742.1-trbv:0.04258,(V33RF-AJFE01039607.1-trbv:0.01045,V4RF-AACZ03053974.1-trbv:0.01029)0.835:0.03309)0.959:0.17243)0.997:0.30442)0.565:0.07454)0.911:0.12930)0.901:0.18653)0.929:0.21522,((V38RF-ABGA01091249.1-trbv:0.02297,V40RF-AACZ03053991.1-trbv:0.02140)0.999:0.61430,((V120RF-JZKE01294692.1-trbv:0.11972,(((V219RF-ABGA01277831.1-trbv:0.04796,(V5RF-ADFV01062069.1-trbv:0.00950,(V213RF-ABGA01277827.1-trbv:0.01932,((V34RF-AJFE01039607.1-trbv:0.00054,V67RF-CABD02352480.1-trbv:0.01905)0.874:0.00949,V1RF-ADFV01062069.1-trbv:0.01907)0.000:0.00055)0.886:0.01957)0.788:0.00993)0.798:0.02090,((V73RF-AQIA01048525.1-trbv:0.02146,((V145RF-AQIB01162312.1-trbv:0.0,V28RF-JYKQ01029807.1-trbv:0.0):0.02156,(V176RF-AHZZ01067656.1-trbv:0.01055,V148RF-AQIB01162312.1-trbv:0.00053)0.000:0.00055)0.208:0.01060)0.895:0.00053,(V72RF-JABR01095741.1-trbv:0.04300,(V68RF-AQIA01048525.1-trbv:0.04252,(V240RF-AHZZ01107345.1-trbv:0.04211,V24RF-JYKQ01029805.1-trbv:0.00055)0.723:0.02120)0.857:0.02134)0.859:0.03418)0.758:0.02097)0.958:0.09584,((V77RF-AQIA01048526.1-trbv:0.01054,V152RF-AQIB01162312.1-trbv:0.01067)0.650:0.00622,((V37RF-AJFE01039609.1-trbv:0.0,V8RF-AACZ03053975.1-trbv:0.0):0.01167,((V161RF-AJFE01070464.1-trbv:0.0,V11RF-AACZ03053977.1-trbv:0.0):0.01046,V72RF-CABD02352492.1-trbv:0.00055)0.938:0.03733)0.953:0.07263)0.834:0.05149)0.847:0.05921)0.995:0.30988,(((V4RF-ADFV01062069.1-trbv:0.06508,(V31RF-JYKQ01029809.1-trbv:0.00934,(V76RF-AQIA01048526.1-trbv:0.02841,(V151RF-AQIB01162312.1-trbv:0.03751,V169RF-AHZZ01067655.1-trbv:0.00054)0.772:0.00054)0.746:0.02951)0.887:0.03031)0.771:0.01542,((V72RF-AQIA01048525.1-trbv:0.01065,V175RF-AHZZ01067656.1-trbv:0.02121)0.931:0.03200,(V1RF-AGCE01061995.1-trbv:0.01864,(V205RF-ABGA01277809.1-trbv:0.02212,((V160RF-AJFE01070464.1-trbv:0.0,V10RF-AACZ03053977.1-trbv:0.0,V71RF-CABD02352491.1-trbv:0.0):0.03169,V9RF-ADFV01062071.1-trbv:0.04087)0.830:0.01823)0.943:0.02951)0.744:0.00055)0.740:0.01261)0.566:0.02045,(V144RF-AQIB01162311.1-trbv:0.05032,V119RF-JZKE01294690.1-trbv:0.19279)0.528:0.01016)0.810:0.13605)0.960:0.37239)0.821:0.17903)0.543:0.18506)0.475:0.12433)0.883:0.36298)0.871:0.19933)0.690:0.13657)0.977:0.73585)0.271:0.09956)0.929:0.15234,((V56RF-JABR01091180.1-ighv:0.01124,((V188RF-AHZZ01084893.1-ighv:0.01015,((((((V105RF-AQIB01153507.1-ighv:0.06154,(V85RF-AQIB01153481.1-ighv:0.03750,((V82RF-JABR01004698.1-ighv:0.00055,(V55RF-JABR01091180.1-ighv:0.01988,(V163RF-AQIA01075825.1-ighv:0.01995,(V6RF-ABGA01025808.1-ighv:0.02374,(V4RF-AJFE01011110.1-ighv:0.01000,V92RF-AACZ03097899.1-ighv:0.02028)0.861:0.01918)0.900:0.02681)0.887:0.00054)0.819:0.00979)0.814:0.01989,V39RF-JYKQ01041713.1-ighv:0.02737)0.808:0.03959)0.731:0.01023)0.972:0.06001,V156RF-AQIA01075814.1-ighv:0.01508)0.836:0.02314,(V130RF-AQIB01153555.1-ighv:0.01800,(V93RF-AACZ03097900.1-ighv:0.01315,V144RF-CABD02117494.1-ighv:0.01771)0.867:0.03087)0.461:0.00054)0.428:0.01025,V7RF-ABGA01025808.1-ighv:0.03053)0.870:0.00054,V187RF-AQIA01075865.1-ighv:0.03090)0.815:0.01021,V106RF-AQIB01153507.1-ighv:0.05161)0.000:0.00054)0.874:0.02122,((V166RF-AJFE01119883.1-ighv:0.01272,V147RF-CABD02117545.1-ighv:0.03077)0.972:0.06136,((V18RF-AHZZ01069451.1-ighv:0.01359,(V232RF-AQIA01066360.1-ighv:0.00054,V15RF-JYKQ01005777.1-ighv:0.02079)0.795:0.01032)0.311:0.02761,(V45RF-AHZZ01100290.1-ighv:0.00055,(V227RF-AQIB01145361.1-ighv:0.0,V228RF-AQIB01145362.1-ighv:0.0):0.02080)0.999:0.11918)0.899:0.00053)0.803:0.01030)0.859:0.01970)0.948:0.06868,(V3RF-ABGA01025791.1-ighv:0.01897,(((((((V9RF-JABR01059011.1-ighv:0.03183,(V9RF-ABGA01025808.1-ighv:0.05293,(V94RF-AACZ03097900.1-ighv:0.03075,V143RF-CABD02117492.1-ighv:0.03184)0.896:0.03087)0.471:0.00054)0.752:0.00925,(V17RF-JABR01070187.1-ighv:0.05197,(V73RF-ABGA01194059.1-ighv:0.02011,(V87RF-JABR01035060.1-ighv:0.00054,(V55RF-AHZZ01104761.1-ighv:0.01036,(V3RF-JYKQ01005758.1-ighv:0.08076,V127RF-AQIB01153553.1-ighv:0.02076)0.000:0.00055)0.887:0.02059)0.866:0.03261)0.918:0.04961)0.876:0.04067)0.785:0.01123,(((V116RF-ADFV01131954.1-ighv:0.01036,((V48RF-AJFE01045051.1-ighv:0.0,V103RF-AACZ03097906.1-ighv:0.0):0.03198,(V136RF-CABD02117473.1-ighv:0.03278,V24RF-ABGA01044313.1-ighv:0.02119)0.889:0.00054)0.897:0.02138)0.790:0.01125,(((((V18RF-JYKQ01005787.1-ighv:0.06837,(V242RF-AQIA01066385.1-ighv:0.00054,V92RF-AQIB01153486.1-ighv:0.04445)0.294:0.02254)0.730:0.01112,V253RF-AQIA01066397.1-ighv:0.01101)0.876:0.02251,V251RF-AQIA01066395.1-ighv:0.01029)0.743:0.01300,(V173RF-JYKQ01042861.1-ighv:0.03261,(V86RF-AQIB01153482.1-ighv:0.01054,V41RF-JYKQ01041713.1-ighv:0.02120)0.770:0.01238)0.389:0.01096)0.860:0.02744,(V58RF-ABGA01099948.1-ighv:0.03331,(V53RF-ABGA01099941.1-ighv:0.02152,(V158RF-AACZ03171037.1-ighv:0.02745,V121RF-CABD02117421.1-ighv:0.02112)0.788:0.01667)0.859:0.02278)0.770:0.01553)0.754:0.00914)0.870:0.02144,(V31RF-ABGA01058273.1-ighv:0.01040,V71RF-ABGA01174999.1-ighv:0.00054)0.926:0.03168)0.770:0.01040)0.000:0.00053,V109RF-ADFV01131944.1-ighv:0.04358)0.827:0.00055,(V164RF-AQIA01075826.1-ighv:0.02046,((V95RF-JABR01049702.1-ighv:0.05257,((V112RF-AQIB01153511.1-ighv:0.01019,V136RF-JYKQ01245888.1-ighv:0.02081)0.774:0.01024,(V189RF-AQIA01075867.1-ighv:0.05532,(V80RF-AHZZ01150255.1-ighv:0.04268,V216RF-AHZZ01096572.1-ighv:0.03132)0.749:0.01020)0.736:0.01031)0.770:0.01033)0.929:0.03272,((V255RF-AHZZ01125719.1-ighv:0.02030,((V202RF-JYKQ01062881.1-ighv:0.03213,V204RF-AHZZ01090492.1-ighv:0.04351)0.827:0.01958,V108RF-AQIB01153509.1-ighv:0.02304)0.771:0.01046)0.755:0.01003,V99RF-JABR01063291.1-ighv:0.04459)0.831:0.01931)0.740:0.01033)0.540:0.01053)0.763:0.01263,(V44RF-ABDC01375549.1-ighv:0.05638,(V17RF-ABDC01314388.1-ighv:0.16196,(V67RF-ABDC01407894.1-ighv:0.01055,(V7RF-ABDC01231274.1-ighv:0.03256,V69RF-ABDC01417489.1-ighv:0.02088)0.892:0.00053)0.748:0.01232)0.694:0.02129)0.775:0.01730)0.962:0.06600,(((V236RF-AQIA01066362.1-ighv:0.00054,(V17RF-AHZZ01069449.1-ighv:0.0,V14RF-JYKQ01005774.1-ighv:0.0):0.01062)0.909:0.02150,(((V85RF-JABR01035059.1-ighv:0.04544,(V119RF-AGCE01148199.1-ighv:0.06869,(V54RF-ABGA01099945.1-ighv:0.05970,(V183RF-AHZZ01084890.1-ighv:0.03184,V135RF-AQIB01153558.1-ighv:0.00053)0.820:0.02896)0.735:0.01539)0.229:0.01189)0.750:0.01211,(V122RF-ADFV01131961.1-ighv:0.01074,V146RF-ADFV01143437.1-ighv:0.04366)0.778:0.01077)0.789:0.01232,(V139RF-AQIB01153566.1-ighv:0.01158,V132RF-JYKQ01245881.1-ighv:0.04281)0.675:0.01102)0.761:0.00053)0.695:0.00055,V237RF-AQIA01066366.1-ighv:0.02030)0.671:0.02282)0.709:0.01159)0.519:0.01331)0.772:0.08746)0.842:0.05009,((V10RF-ABDC01282057.1-ighv:0.03190,V42RF-ABDC01373301.1-ighv:0.02264)0.758:0.00874,(V74RF-ABDC01421861.1-ighv:0.08591,(V12RF-ABDC01282065.1-ighv:0.11866,(V43RF-ABDC01375549.1-ighv:0.0,V87RF-ABDC01454767.1-ighv:0.0):0.05347)0.777:0.02228)0.837:0.02784)0.263:0.01363)0.856:0.02784)0.877:0.03178)0.899:0.02926,((((((((V135RF-CABD02117471.1-ighv:0.05765,(V119RF-AJFE01045439.1-ighv:0.01081,V162RF-AACZ03171037.1-ighv:0.02167)0.762:0.01318)0.687:0.01128,(V135RF-ABDC01471087.1-ighv:0.03083,((V108RF-AACZ03097912.1-ighv:0.01144,V130RF-CABD02117457.1-ighv:0.00970)0.996:0.11343,(V93RF-JZKE01278271.1-ighv:0.07047,(V118RF-ABDC01345813.1-ighv:0.05648,(V139RF-JABR01077917.1-ighv:0.10304,((V29RF-ABGA01058270.1-ighv:0.03251,V68RF-ABGA01174988.1-ighv:0.00055)0.932:0.03589,(((V126RF-CABD02117442.1-ighv:0.03221,V127RF-CABD02117444.1-ighv:0.00055)0.884:0.02164,(V111RF-AACZ03098145.1-ighv:0.03340,V114RF-AACZ03098176.1-ighv:0.03371)0.864:0.02192)0.984:0.05559,V80RF-ABGA01243345.1-ighv:0.00055)0.722:0.01947)0.649:0.00437)0.297:0.02869)0.515:0.01578)0.755:0.01595)0.866:0.04762)0.940:0.08007)0.945:0.06942,((V247RF-AQIA01066387.1-ighv:0.11180,V10RF-JABR01059011.1-ighv:0.05940)0.767:0.01585,(((V120RF-CABD02117420.1-ighv:0.02168,(((V159RF-AACZ03171037.1-ighv:0.01103,(V43RF-AJFE01045041.1-ighv:0.01110,V121RF-AGCE01148386.1-ighv:0.09636)0.789:0.01096)0.825:0.01103,((((V165RF-AQIA01075827.1-ighv:0.01049,V256RF-AHZZ01125719.1-ighv:0.00055)0.989:0.08084,(V202RF-AHZZ01090491.1-ighv:0.01057,V200RF-JYKQ01062878.1-ighv:0.02178)0.850:0.02056)0.557:0.02138,V117RF-ADFV01131956.1-ighv:0.06403)0.501:0.00055,V121RF-AJFE01045447.1-ighv:0.09009)0.858:0.00054)0.833:0.01062,((V106RF-ADFV01131940.1-ighv:0.03715,(V122RF-AJFE01045453.1-ighv:0.05119,(V56RF-ABGA01099946.1-ighv:0.06596,(V151RF-CABD02136430.1-ighv:0.02172,(V204RF-AACZ03172648.1-ighv:0.00055,V176RF-AACZ03182257.1-ighv:0.01101)0.881:0.00054)0.953:0.04425)0.764:0.01413)0.770:0.01736)0.719:0.02334,(V10RF-ABGA01025808.1-ighv:0.11580,V120RF-ABGA01384193.1-ighv:0.01468)0.868:0.02885)0.800:0.02186)0.719:0.00055)0.791:0.01085,((V99RF-AQIB01153501.1-ighv:0.00055,V46RF-JYKQ01041718.1-ighv:0.06189)0.960:0.04521,(V78RF-JABR01004697.1-ighv:0.04293,(V87RF-AQIB01153482.1-ighv:0.02122,(V179RF-AHZZ01069458.1-ighv:0.07591,((V157RF-AQIA01075814.1-ighv:0.03278,V109RF-AQIB01153509.1-ighv:0.02182)0.469:0.02127,V243RF-AQIA01066387.1-ighv:0.04445)0.906:0.00055)0.760:0.01185)0.953:0.05875)0.738:0.01176)0.954:0.04725)0.779:0.01032,(V114RF-ADFV01131951.1-ighv:0.02245,V125RF-ADFV01131961.1-ighv:0.01114)0.901:0.03366)0.842:0.01950)0.081:0.00282)0.899:0.04093,V119RF-CABD02117419.1-ighv:0.00100)0.817:0.02388,(V136RF-JABR01077916.1-ighv:0.02976,(V223RF-AHZZ01103097.1-ighv:0.03331,(V169RF-AQIA01075832.1-ighv:0.03280,V139RF-JYKQ01245890.1-ighv:0.00053)0.779:0.01077)0.769:0.01661)0.911:0.04209)0.917:0.04646,(((V161RF-AQIA01075823.1-ighv:0.06078,((((V26RF-AHZZ01091599.1-ighv:0.03832,V126RF-AQIB01153553.1-ighv:0.04189)0.461:0.02210,V181RF-AQIA01075862.1-ighv:0.01852)0.761:0.01475,(V45RF-JYKQ01041718.1-ighv:0.05765,V254RF-JYKQ01237599.1-ighv:0.02710)0.898:0.03110)0.786:0.01135,(V246RF-AQIA01066387.1-ighv:0.01128,V56RF-AHZZ01104763.1-ighv:0.02616)0.779:0.01314)0.753:0.01516)0.924:0.05113,(V71RF-AGCE01148057.1-ighv:0.04230,V68RF-AGCE01147944.1-ighv:0.08463)0.825:0.02636)0.769:0.01061,((V168RF-AQIA01075832.1-ighv:0.01371,(V215RF-AHZZ01096568.1-ighv:0.03070,V114RF-AQIB01153511.1-ighv:0.06047)0.361:0.01110)0.914:0.04167,(V86RF-JABR01035059.1-ighv:0.05644,V83RF-JABR01011024.1-ighv:0.04830)0.490:0.02190)0.875:0.00054)0.738:0.01144)0.804:0.02381,(((((V205RF-AACZ03172650.1-ighv:0.00055,(V175RF-AACZ03179884.1-ighv:0.01143,(V35RF-CABD02136430.1-ighv:0.0,V150RF-CABD02136430.1-ighv:0.0):0.02286)0.000:0.00055)0.945:0.03536,((V55RF-ABGA01099946.1-ighv:0.04725,V117RF-CABD02117398.1-ighv:0.04656)0.854:0.02328,(V12RF-ABGA01025810.1-ighv:0.05784,(V18RF-JABR01070187.1-ighv:0.01780,(V159RF-AQIA01075820.1-ighv:0.02277,V128RF-JYKQ01245874.1-ighv:0.01106)0.844:0.02170)0.871:0.02930)0.758:0.01085)0.781:0.01216)0.710:0.01122,((V66RF-AGCE01147874.1-ighv:0.04528,V60RF-AGCE01147864.1-ighv:0.06036)0.735:0.00809,(V198RF-JYKQ01056010.1-ighv:0.00055,(V14RF-JABR01066987.1-ighv:0.03403,V12RF-AHZZ01064615.1-ighv:0.06158)0.000:0.00055)0.939:0.04335)0.767:0.01739)0.925:0.03261,(V60RF-ABGA01099956.1-ighv:0.01483,((V17RF-JYKQ01005784.1-ighv:0.01090,(V234RF-AQIA01066360.1-ighv:0.04495,V20RF-AHZZ01069455.1-ighv:0.00055)0.874:0.02230)0.854:0.02538,(V24RF-AHZZ01069456.1-ighv:0.00054,V21RF-JYKQ01005789.1-ighv:0.01116)0.840:0.02651)0.715:0.02749)0.874:0.03982)0.935:0.00054,((((V57RF-ADFV01136793.1-ighv:0.04653,V138RF-CABD02117477.1-ighv:0.01521)0.654:0.02770,((V5RF-ABGA01025797.1-ighv:0.03377,V57RF-ABGA01099947.1-ighv:0.04347)0.874:0.03327,(V41RF-AJFE01045037.1-ighv:0.02275,V157RF-AACZ03171037.1-ighv:0.00054)0.934:0.03425)0.753:0.01210)0.886:0.03153,(V76RF-ABDC01423814.1-ighv:0.04367,(V161RF-ABGA01203420.1-ighv:0.02468,V134RF-AQIB01153557.1-ighv:0.15914)0.911:0.03972)0.902:0.00052)0.848:0.02463,((((((V102RF-JZKE01278610.1-ighv:0.04545,V106RF-JZKE01278614.1-ighv:0.08159)0.871:0.03035,((((V84RF-JZKE01255181.1-ighv:0.02961,V85RF-JZKE01255182.1-ighv:0.06733)0.852:0.03052,(V91RF-JZKE01278268.1-ighv:0.03258,(V31RF-JZKE01255160.1-ighv:0.09104,(V13RF-JZKE01244715.1-ighv:0.05297,(V94RF-JZKE01278273.1-ighv:0.00053,V98RF-JZKE01278602.1-ighv:0.05383)0.979:0.07138)0.784:0.01970)0.560:0.00154)0.413:0.01084)0.113:0.00054,(V100RF-JZKE01278607.1-ighv:0.00054,V101RF-JZKE01278609.1-ighv:0.05562)0.717:0.01095)0.671:0.00055,((V78RF-JZKE01235368.1-ighv:0.03361,V89RF-JZKE01278255.1-ighv:0.00054)0.821:0.02367,((V86RF-JZKE01278248.1-ighv:0.04561,((V12RF-JZKE01244710.1-ighv:0.04000,V99RF-JZKE01278605.1-ighv:0.03250)0.701:0.02767,V9RF-JZKE01244686.1-ighv:0.11203)0.257:0.00054)0.756:0.01852,(V97RF-JZKE01278602.1-ighv:0.04702,V92RF-JZKE01278271.1-ighv:0.05485)0.353:0.02612)0.845:0.02515)0.414:0.01292)0.747:0.02187)0.769:0.01789,(V105RF-JZKE01278611.1-ighv:0.03903,(V95RF-JZKE01278276.1-ighv:0.03411,V90RF-JZKE01278267.1-ighv:0.08332)0.532:0.04028)0.640:0.00955)0.917:0.03346,(V43RF-JYKQ01041713.1-ighv:0.01113,(V180RF-AHZZ01069458.1-ighv:0.02199,(V244RF-AQIA01066387.1-ighv:0.00055,V138RF-JYKQ01245889.1-ighv:0.05543)0.004:0.01437)0.867:0.02195)0.789:0.00055)0.766:0.01215,V128RF-AQIB01153553.1-ighv:0.04437)0.583:0.01068,(V42RF-AJFE01045037.1-ighv:0.06215,((V120RF-ABDC01345817.1-ighv:0.08092,((V6RF-ABDC01231272.1-ighv:0.00988,V41RF-ABDC01373300.1-ighv:0.00051)0.962:0.07275,((V88RF-JZKE01278253.1-ighv:0.02011,(V11RF-JZKE01244709.1-ighv:0.04404,V104RF-JZKE01278611.1-ighv:0.04537)0.803:0.01815)0.952:0.05418,(V96RF-JZKE01278277.1-ighv:0.04561,V103RF-JZKE01278610.1-ighv:0.05579)0.854:0.02262)0.809:0.04060)0.496:0.03965)0.762:0.02036,((V6RF-AJFE01011113.1-ighv:0.0,V98RF-AACZ03097900.1-ighv:0.0):0.04202,(V142RF-CABD02117487.1-ighv:0.02779,((V46RF-AJFE01045051.1-ighv:0.0,V101RF-AACZ03097906.1-ighv:0.0):0.01100,V97RF-AACZ03097900.1-ighv:0.00055)0.000:0.00472)0.872:0.03047)0.738:0.00921)0.606:0.01158)0.653:0.00308)0.752:0.01126)0.854:0.02708)0.820:0.01192)0.074:0.01033,(V52RF-ABGA01099941.1-ighv:0.08194,((((((V187RF-AHZZ01084892.1-ighv:0.04457,(V190RF-AQIA01075868.1-ighv:0.01077,V6RF-JYKQ01005770.1-ighv:0.03255)0.867:0.02053)0.770:0.01194,V133RF-AQIB01153557.1-ighv:0.01207)0.935:0.03208,V107RF-AQIB01153509.1-ighv:0.03231)0.371:0.00053,(V131RF-JYKQ01245880.1-ighv:0.01055,(V231RF-AQIB01158235.1-ighv:0.02136,(V113RF-AQIB01153511.1-ighv:0.01050,(V217RF-AHZZ01096574.1-ighv:0.01054,(V255RF-AQIA01073275.1-ighv:0.00055,V135RF-JYKQ01245886.1-ighv:0.01058)0.000:0.00055)0.787:0.01074)0.981:0.05789)0.740:0.01034)0.797:0.01056)0.890:0.02214,(V8RF-ABGA01025808.1-ighv:0.06540,V112RF-ADFV01131950.1-ighv:0.05657)0.000:0.00055)0.066:0.00906,V8RF-ABDC01231277.1-ighv:0.12825)0.744:0.01162)0.892:0.03157)0.930:0.00054)0.880:0.03129);
