# Supplementary material for: Iterative Variable Gene Discovery from Whole Genome Sequencing with a Bootstrapped Multiresolution Algorithm
Source: Comput Math Methods Med. 2019 Feb 11;2019:3780245. doi: 10.1155/2019/3780245 (PMC6388353; doi:10.1155/2019/3780245)
Supplement: Supplementary Materials — supp_materialsV2.pdf: this is an updated document, which includes new figures requested by the reviewer. sequences_alignments.zip: these are genome sequence files that are relevant for reproducing some of the results. [file 3780245.f1.zip › 3780245.f1/sequences_alignments/bstrp_iteration_2.fasta]

>V0RF-AHZZ01030316.1-trgv |(38846, 39156)|1.60519709581|(0.875,0.608,0.612)|1
SQKSSNLEGKTKSITGPTGSPAEITCDLPGVSTLYIHWYLHQEGKAPQRLLYYEPYYFTV
VLESGISPGKYDTASTRKSWNLRLQNLIENDSGIYYCATWD
>V1RF-AHZZ01030316.1-trgv |(43861, 44177)|2.98553608204|(1.000,0.990,0.996)|1
SQKSSNLEGRTKSVTRPTGSSAEITCDLPEVSSFYIHWYLHQEGKAPQRLLYYDSSNSRV
VLESGISPGKYDTYGSTRRRNLRLILRNLIENDSGVYYCANWD
>V2RF-AHZZ01035404.1-trdv |(2190, 2491)|2.85494383314|(0.991,0.953,0.931)|1
SGMAQTVTQSQPEMSVREAETMTLSCTYDTSESNYYLFWYKQPPSRQMILIIRQEAYKQQ
NATENRFSVNFQKAAKSFSLKISDSQLGDAAMYFCAFM
>V3RF-AHZZ01035404.1-trav |(11684, 11986)|2.99493200206|(1.000,0.996,0.999)|1
SGMAQTVTQSQPEMSVQEAETVTLSCTYDTSDSDYYLFWYKQPPSRQMILIIRQEAYKQQ
NATENRFSVNFQKAAKSFSLKISDSQLGDAAMYFCAYRS
>V4RF-AHZZ01035404.1-trav |(35215, 35503)|2.99799600001|(0.999,0.999,1.000)|1
LSGELKVGQNPLFLSTQEGKNYTIYCNYSTASNRLYWYRQDPGKSLESLFVLLSNGAVKQ
EGRLMASLDTKARLSSLHITAALQDLSATYFCAV
>V5RF-AHZZ01035404.1-trav |(52269, 52555)|1.50633017406|(0.557,0.463,0.905)|1
VSAAKNEVEQSPQDLTAQEGEFITINCSYSIGINSLHWLQQHPGGGIVSLFMLSSEKKKN
GRLIATINIQERHSSLHIAASQPRDSAIYICAV
>V6RF-AHZZ01040804.1-igkv |(26742, 27054)|2.41208562797|(0.981,0.989,0.705)|1
CNGDIVLTQSPASLAVSPGQRATITCRASESVSLLGINFIHWYQQKPGQPPKLLIYQASN
KDTGVPARFSGSGSGTDFTLTINPVEADDAANYYCLQSKDLP
>V7RF-AHZZ01040804.1-igkv |(44403, 44694)|2.99494800078|(1.000,0.998,0.997)|1
IVLTQSPTSMAVSQGERVTISCTASSSVSTSYLHWYQQKPGFPPRLLVYRTSSLASGVPA
RFSGSGSGTSYTLTISSMEAEDAANYYCQQGNSIP
>V8RF-AHZZ01042100.1-igkv |(22346, 22662)|2.39426919901|(0.945,0.696,0.977)|1
TSGDILLTQTPLSLPVTPAEPASISCRSSQSLLHSNGNTYLHWYLQKPGQSPQLLIYEVS
NRASGVPERFSGSGSGTDFTLKISLVEAEDVGVYYCMQTTQWP
>V9RF-AHZZ01042101.1-igkv |(1294, 1609)|2.63259108277|(0.943,0.852,0.884)|1
SSGDIVMTQTPLSLPVTLGEPTSISCRSSQSLVYSDGKTYLHWYLQKPGQSLQLLMYLVS
KRASGVPDRFSGSGSGTDFTLKISRVEAEDVGVYYCMQTLRSP
>V10RF-AHZZ01042101.1-igkv |(23302, 23620)|2.23644166627|(0.984,0.650,0.964)|1
SSGDIVMTQTPLFLPVTLGEPASISCRSSQSLLDSEDGNTYLDWYLQKPGQSPQLLIYEV
SNRASGVPDRFSGSGSDTDFTLKISRVEAEDVGVYYCMQALEFP
>V11RF-AHZZ01064615.1-ighv |(3396, 3696)|2.98796400065|(0.997,0.997,0.994)|1
VQCEVQLVESGGGLVQPGGSLRLSCAASGFTFSSYAMQWVHQTPGKGLEWVSAIGPGGDT
YYADAVKGRFTISRDNAKNSLYLQMNSLRAEAVYYCAR
>V12RF-AHZZ01064617.1-ighv |(710, 1019)|2.63305438058|(0.850,0.870,0.988)|1
AHSQEQLVQSGAEVKKPGASVKVSCKASEYTFTSYVISWLRQAPGQGFEWMGGINPSDGS
TSYAQKFQDRVTITADMSTSTVYMELSSLRSEDTAVYYCAR
>V13RF-AHZZ01064625.1-ighv |(10295, 10604)|2.92658443703|(0.990,0.950,0.993)|1
VLSQVQLQESGPAVVKPSQTLSLTCAVSGGSISSGYDWSWIRQSPGKALEWIGYISYSGS
TNYNPSLKSRVTISRDTSKNQFSLKLSSVTAADTAVYYCAR
>V14RF-AHZZ01064628.1-ighv |(242, 554)|2.7290952916|(0.954,0.839,0.994)|1
VLSQVKLQQWGEGLVKLSETLSLTCAVYGGSISGYYYWSWIRQAPGKGLEWIGSIYSSGS
STYYNPSLKSRVTISTDTSKNQFSLKLSSVTAADSAVYYCAR
>V15RF-AHZZ01064636.1-ighv |(1268, 1580)|2.67674188868|(0.869,0.906,0.916)|1
VLSQVKLQQWGEGLVKPSETLSLTCAVYGGSISGYYYWSWIRQPPGKGLEWIGNIDGNSA
STNYNPSLKNRVTISKDTSKNQFSLKLSSVTAADSAVYYCAR
>V16RF-AHZZ01069449.1-ighv |(25634, 25949)|3.0|(1.000,1.000,1.000)|1
VQCEVQLVESGGGLVQPGGSLRLSCAASGFTFSNYWMNWVRQAPGKGLEWVGFIKNKADG
GTAAYAESVKGRFTISRDDSKNTLYLQMNSLKTEDTAVYYCTR
>V17RF-AHZZ01069451.1-ighv |(7153, 7468)|2.99799200002|(1.000,0.999,0.999)|1
VQCEVQLVESGGGLVQPGRSLRLSCAASGFTFSNYYMHWVRQAQGKGLEWVGLIRNKANS
YTTEYAAAVKGRFTISRDDSKNTLYLQMSSLKTEDTAVYYCTT
>V18RF-AHZZ01069453.1-ighv |(22421, 22735)|2.32647796434|(0.963,0.703,0.909)|1
VFSQVTLKESGPALVKPTQTLTLTCTFSGFSLSTSGMRVSWIRQPPGKALEWLARIDWDD
DKYYSTSLKSRLTISKDTSKNQVVLTMTNMDPVDTATYYCARR
>V19RF-AHZZ01069455.1-ighv |(6977, 7286)|2.97360004313|(0.992,0.984,0.998)|1
VQCEVQLVESGGGLVQPGGSLRLSCAASGFTFSSYYMYWIRQAPGKGLQWVSAINTGGGS
TWYTDSVKGRFTISRENAKNTLYLQMNSLRAEDTAVYYCAK
>V20RF-AHZZ01069455.1-ighv |(20090, 20405)|2.49395048153|(0.978,0.733,0.998)|1
VQCEMQLVESGGGLAQPGGSLRLSCAASGFTFSDHYMHWVRQAPGKGPEWVGFIRNKAKG
GTAEYAASVKGRFTISRDDSKNVTYLQMNSLKTEDTAVYYCAR
>V21RF-AHZZ01069455.1-ighv |(33477, 33791)|2.26423290389|(0.970,0.747,0.817)|1
VLSQVTLKESGPALVKPTQTLTLTCTFSGFSLSTSGMCVSWIRQPPGKALEWLARIDWDN
DKYYSTSLKSRLTISKDTSKNQVVLTMTNMDPVDTATYYCARV
>V22RF-AHZZ01069455.1-ighv |(52071, 52380)|2.06554107248|(0.992,1.000,0.575)|1
VLSQVQLQESGPGLVKPSETLSLTCAVSGGSISSYWWGWIRQPPGKGLEWIGHIYGSSGS
NYLNPSLKSRVTISIDTSKNQLSLKLSSVTAADTAVYYCAR
>V23RF-AHZZ01069456.1-ighv |(9988, 10297)|3.0|(1.000,1.000,1.000)|1
VQCEVQLVESGGGLVQPGGSLRLSCAASGFTFSSYGMHWARQAPGKGLEWVSAINTGGGS
TWYADSVKGRFTISRENAKNTLYLQMNSLRAEDTAVYYCAK
>V24RF-AHZZ01091598.1-ighv |(21923, 22232)|2.69209737519|(0.952,0.918,0.860)|1
AHAQVQLVQSGAQIKQPGASVKLSCKASGYTFTSYYMHWVRQAPGQGLEWIGLISPYNGN
KGYAQNFQGRVTITTDTSTSTGYMELSSLRSEDTAVYYCTR
>V25RF-AHZZ01091599.1-ighv |(2219, 2528)|2.99899600001|(1.000,0.999,1.000)|1
VQCEVQLVESGGGLSKPGGSLRLSCAASGFTFSDYNMDWVRQASGKGLEWVSSINTGGGS
TWYADSVKGRFTISRENAKNTLYLQMNSLRAEDTAVYYCAR
>V26RF-AHZZ01091599.1-ighv |(13841, 14150)|2.83212111157|(0.969,1.000,0.891)|1
VQCEVQLVESGGGLVQPGGSLRLSCAASGFTFSDNYMEWVRQAPGKGLQWVGQINPNGGT
TFLMDSVKGRFTISRDNAKNTLYLQTSSLNTEDTAVYYCTR
>V27RF-AHZZ01091600.1-ighv |(4723, 5037)|1.60576770864|(0.929,0.693,0.576)|1
VLSQVTLKESGPALVKPTQTLTLTCTFSGFSLTTSGMGVGWIRQPPGKALEWLAHIYWDD
DKRYSPSLKSRLTISKDTSKNQVVLTMTNMDPVDTATYYCARR
>V28RF-AHZZ01091603.1-ighv |(4407, 4716)|2.99083600705|(0.994,0.998,0.999)|1
VLSQVQLQESGPGLVKPSETLSLTCAVSGGSISSNYWNWIRQPPGKGLEWIGRIYGGSGS
TDYSPSLKSRVTISTDTSKNQLSLKLSSVTAADTAMYYCAR
>V29RF-AHZZ01097944.1-iglv |(5376, 5682)|2.99798400013|(1.000,1.000,0.998)|1
DSETVVTQEPSLSVSSGGTVTLTCGLSSGSVSTSNYPSWYQQTPGQAPRTLIYRTNTRPS
GVPDRFSGSILGNKAALTITGAQADDESDYYCMLYMGSGI
>V30RF-AHZZ01097949.1-iglv |(59447, 59759)|2.99798400013|(1.000,1.000,0.998)|1
SWAEVVFTQPHSVSGSPGQTVTISCTRSSGSIDSKYVQWYQQRPGSAPTTVIYEDNKRPS
GVPDRFSGSIDSSSNSASLTISGLNSEDEADYYCQSADGSYN
>V31RF-AHZZ01098200.1-trav |(876, 1169)|2.99398000014|(0.999,0.998,0.997)|1
VWSQQKEVEQNPGPLSVPEGATASLNCTYSNSAFQNFMWYRQYSRKGPQLLIYTYSSGNK
EEGRFTAQVDKSSKYISLFIRDSQPSDSATYFCAMS
>V32RF-AHZZ01098200.1-trav |(13982, 14270)|1.97604324564|(0.741,0.562,0.815)|1
PVFEEAPVLLRCNYSSSSVSVYLFWYVQYPNQGLQLLLKYLSGPTLVKGINGFEAEFKKS
ETSFHLRKPSTHISDTAEYFCAVSDTVLETAEEL
>V33RF-AHZZ01098200.1-trav |(35496, 35783)|2.99496000066|(0.999,1.000,0.996)|1
VNSQQGEEDPQTLSIQEGENATMNCSYKTSINNLQWYRQDSGRSLVQLILICSNEREKNS
GRLRVTLDTSKKSSSLLITASRAADTASYFCATD
>V34RF-AHZZ01098200.1-trav |(47312, 47603)|2.95851611711|(0.990,0.979,0.990)|1
RTNGDLVTQTEGPVTLPERAALTLNCTYQTSYSAFIFWYVQYPNKEPELLLKSSENQETN
SRGFQASHDKSDSSFHLEKPSVQLSDSAVYYCVLR
>V35RF-AHZZ01098200.1-trav |(50539, 50842)|2.98788400513|(0.997,0.999,0.992)|1
SSMAQKVTQAQTEISVVEKEDVTLDCVYETRENTYYLFWYKQPPSGELVFLIRRNSFDEQ
NEMNGRYDSNFQKSTSSFNLTITASQVVDSAVYFCALNE
>V36RF-AHZZ01098200.1-trav |(85982, 86269)|2.9460773318|(0.979,0.970,0.999)|1
LSGEDQVMQSPEALSLQEGESSSLNCSYTVSGLRGLFWYRQDPGKGPEFLFSLYSAGEEK
EKERLKATLTKKESFLHITGPKPEDSATYLCAVQ
>V37RF-AHZZ01098206.1-trav |(7994, 8291)|1.84220465884|(0.676,0.521,0.846)|1
VRGIQVEQSPPDLILQEGANSTLRCNFSATVNNLQWFHQNPWGQLINLFYIASGTKQNGR
LSATTVTTERYSLLHISSSQTTDSGIYFCAVKSQCSP
>V38RF-AHZZ01098942.1-ighv |(3874, 4183)|2.99193200206|(0.999,0.998,0.995)|1
VLSQVQLQESGPGLVKPSETLSLTCAVSGGSFSSNYWSWICQPPGKGLEWIGGIYGSGGS
TYYNPSLKNRVTISTDTSKNQFSLKLSSVTAADTAVYYCAR
>V39RF-AHZZ01098950.1-ighv |(183, 495)|2.99799600001|(0.999,0.999,1.000)|1
VLSQVQLQESGPGLVKPSETLSLTCAVSGYSISSGYYWGWIRQPPGKGLEWIGYIYGNSA
STYYNPSLKSRVTISKDTSKNQFSLKLSSVTAADTAVYYCAR
>V40RF-AHZZ01099970.1-iglv |(6343, 6653)|3.0|(1.000,1.000,1.000)|1
SWAEVVFTQPHSVSGSPGQTVTISCTRSSGSIDSKYVQWYQQRPGSAPTTVIYNDDQRPS
GVPDRFSGSIDSSSNSASLTISGLKSEDEADYYCQSADSSS
>V41RF-AHZZ01099973.1-iglv |(38400, 38710)|2.99285201038|(1.000,0.994,0.999)|1
SWAQSVLTQPPSVSGAPGQRVTISCTGSSSNIGAGYYVSWYQQLPGTAPKLLIYENNKRP
SGVSDRFSGSKSGTSASLAITGLQAEDEADYYCQSYDSSLS
>V42RF-AHZZ01100290.1-ighv |(204, 517)|2.97506440553|(0.998,0.983,0.995)|1
VQCEVQLVESGGGLVQPGRFLRLSCAASGFTFSNYYMHWAHQAQGRGLEWVSLMRKKANS
YTTEYAVSVKDRFTISRDDSKNTLYLQMNSLKTEDTAVYYCA
>V43RF-AHZZ01104241.1-igkv |(8110, 8412)|2.47458291336|(0.924,0.894,0.761)|1
STGDVVMTQSPLSLPVTPGEPASISCRSSQSLLHSSGNTYLSWFQQKPGQSARRLIYKVS
NRDSGVPDRFTGSGAGTDFTLKISRVEAEDVGVYYCMEG
>V44RF-AHZZ01104241.1-igkv |(24888, 25186)|2.72781695215|(0.994,0.835,0.995)|1
SKGEIVLTQSPAFRSVTLKEKVTITCQASQSIGSSLHWYQQKPDRSPKLLIKYASQSISG
VPSRFSGSGSGTDFTLTINSLEAEDAATYYCQQSSSL
>V45RF-AHZZ01104241.1-igkv |(53164, 53464)|2.99288400513|(1.000,0.995,0.998)|1
TSGEIVLTQSPATLSLSPGERATLSCRASQSVGSSLAWYQQKPGQAPRLLIYGASSRATG
IPDRFSGSGSGTEFTLTISSLEPEDFVVYYCQKYSSSP
>V46RF-AHZZ01104241.1-igkv |(58624, 58924)|2.99799200002|(1.000,0.999,0.999)|1
VRCDIQMTQSPSFLSASVGDRVTITCQASQSISNDLAWYQQKPGKSPTLLIYDATNLHTG
VPSRFSGSGSGADYSLTISSLELEDFAAYYCQQEYSYP
>V47RF-AHZZ01104243.1-igkv |(11240, 11555)|1.54446241966|(0.473,0.610,0.573)|1
SIGDIELTQTLHSLPVNPGEPASISCQSSQSLLHSDGKTYFYWFLRKPGQHPRLPIYWVS
NWNTGAPDRFSGSGAGTDFTLKISVVEAEDVGVYYYTQVTHWP
>V48RF-AHZZ01104243.1-igkv |(37856, 38148)|2.83939966024|(0.997,0.889,0.999)|1
SRGDIVMTQSPAFVSVTPGEKVTITCQASEGISNYLHWYQQKPDQAPKLFIQYASQSISG
VPSRFTGSGSGTDFTFTISSLEVEDAATYYCQQGN
>V49RF-AHZZ01104243.1-igkv |(54085, 54379)|2.99280401921|(1.000,0.993,1.000)|1
RGDIQMTQSPSSLSASVGDRVTITCRASQSFSSLAWYQQKPGKAPKLLIYSASSLQSGVP
SRFSGSKSGTDFTLTISSLQPEDVASYYCQQYYSYP
>V50RF-AHZZ01104243.1-igkv |(69226, 69518)|3.0|(1.000,1.000,1.000)|1
AKCDIQMTQSPSSLSASVGDRVTITCRASQTISSYLAWYQQKPGKVPKLLIYAASSLESG
VPSRFSGSGSGTEFTLTISSLQPEDFATYYCQQHN
>V51RF-AHZZ01104760.1-ighv |(306, 615)|2.65150546287|(0.993,0.803,0.990)|1
VQGEVQLVESGGGLAKPGGSLRLSCAASGFTFSDHYMHWVRQAPGKGLEWISAINSGGGS
TYYAESVKGRFTISRENAKNTLYLQMDSLRAEDTAVYYCAR
>V52RF-AHZZ01104761.1-ighv |(4083, 4398)|2.99698000014|(0.998,1.000,0.999)|1
VKCEAQLMESGGGLVQPGGSLRLSCAASGFTFSDHYMQWVRQAPGKGLEWVGLIRNKADG
ETTDYAASVKGRVTTSRDDSKSITYLQMNNLKTEDTAVYYCAR
>V53RF-AHZZ01104763.1-ighv |(4374, 4683)|2.99698000014|(1.000,0.998,0.999)|1
VQCEVQLVESGGGLAKPGGSLRLSCAASGFTFSDYYMDWVRQAPGKALEWVSGISNTGGS
TWYADSVKGRFTISRENAKNTLYLQMSSLRAEDTAVYYCAR
>V54RF-AHZZ01105091.1-igkv |(457, 757)|2.99899600001|(1.000,1.000,0.999)|1
ARCDIQMNQSPSSLSASVGDTATITCRASQGISNNLAWYQQKPGKAPKLLIYAASSLESG
VPSRFSGSGSGTEFTLTISSLQPEDFAAYYCQQYNSLP
>V55RF-AHZZ01107544.1-trav |(5301, 5591)|2.99696400065|(1.000,1.000,0.997)|1
VNGENVEQHPSTLSVQEGDSSVIKCTYSDSASNYFPWYKQELGKGPQFIIDIRSNEHEKK
DQRITVLLNKTAKHFSLHITETQPGDSAVYFCAAS
>V56RF-AHZZ01107544.1-trav |(27803, 28091)|2.9898400105|(0.998,0.992,1.000)|1
VWSQQKVEQSSGPLSVPEGAIASLNCTYSDSGSQSFFWYRQYSGQSPELLMSTYSSGDKE
DGRFTAQLNRASQYVSLLIRDSQLSDSATYLCAV
>V57RF-AHZZ01107544.1-trav |(34317, 34614)|2.66644284622|(0.993,0.948,0.832)|1
GTRAQSVTQLDSQVSVSEGVPVLLRCNYSSSFSPTLFWYVQYPNQGLQLLLKYISGTTLV
KGINGFEAEFKKSETSFHLTKASAHVSDAAEYFCAVN
>V58RF-AHZZ01107544.1-trav |(53747, 54040)|3.0|(1.000,1.000,1.000)|1
VSRGESVGLHLPTVSVQEGDNSVINCTYSDSASDYFLWYKQESGKGPQSIIDIRSNMAKR
QGQRLTVLLNKTMKHLSLQIAATEPGDSAVYFCAEN
>V59RF-AHZZ01107545.1-trav |(4983, 5284)|2.97941612211|(0.988,0.999,0.993)|1
SGIAQKITQTQPAMFVQEKEAVTLDCTYDTSDQNYGLFWYKQPSSGEMIFLILQMSYDKQ
NATEGHYSLNFQKARKSVNLVISASQVGDSATYFCAMR
>V60RF-AHZZ01107545.1-trav |(23299, 23593)|3.0|(1.000,1.000,1.000)|1
RTRGDSVTQMEGPVTLSERAFLTINCTYTATGYPSLFWYVQYPGEGPQLLLKATKTDEKG
SNKGFEATYRKETTSFHLKKDSVQESDSAVYFCALS
>V61RF-AHZZ01108247.1-ighv |(744, 1053)|2.80273988855|(0.990,0.882,0.977)|1
AHSEVQLVQSGSEVKKPGATVKISCKASGYTFIDYYLHWVRQAPGKGLEWMGGVDPEDGE
ADYAQKFQGRVTITADTSTDTAYMELSSLRSEDTAVYYCAR
>V62RF-AHZZ01109397.1-igkv |(45, 345)|2.99899200002|(0.999,1.000,1.000)|1
ARCDIQMTQSPSSLSASVGDRVTITCRASQGISSYLNWYQQKPGKAPKLLIYDATTLQSG
VPSRFSGSGSGTEFTLTISSLQPEDFAVYYCQQRNSYP
>V63RF-AHZZ01109397.1-igkv |(20176, 20476)|3.0|(1.000,1.000,1.000)|1
ARCDIQMTQSPSSLSASVGDRVTITCQASQGISSWLSWYQQKPGKAPKLLLYKASGLQSG
VPSRFSGSGSGTEFTLTISSLQPEDFATYYCQQFSSAL
>V64RF-AHZZ01109398.1-igkv |(3225, 3525)|2.99899600001|(1.000,1.000,0.999)|1
TTGEIVMTQSPATLSLSPGERATLSCRASQSVSSRLAWYQQKPGQAPRLLIYDASSRATG
IPDRFSGSGSGTEFTLTISSLEPEDVGVYYCQQSYSWP
>V65RF-AHZZ01110760.1-ighv |(1676, 1985)|2.78246798908|(0.938,0.967,0.890)|1
VLSQVQLQESGPGLVKPSETLSLTCAVSGASISSNWWSWIRQAPGKGLEWIGEINGNSGS
TNYNPSLKSRVTISKDASKSQFSLKLSSVTAADTAVYYCAR
>V66RF-AHZZ01111404.1-ighv |(10609, 10903)|1.79562152184|(0.951,0.873,0.520)|1
AQSQVQLVQSGAEVKKPGASVKVSCKASGYTFSTYAISWVRQAPGQGLEWMGGIIPLVGI
TNYAQKFQGRDTSTSTAYMELSSLRSEDTAVYYCAR
>V67RF-AHZZ01111405.1-ighv |(9460, 9769)|2.75153158583|(0.991,0.946,0.875)|1
AHSQVQLVQSGAEVKQPGSSVKVSCKASGYTFTNSAMQWVRQTPGQGLEWIGWIIIGNGN
TNYAQKFQGRVTITRDTSTSTGYMELSSLRSEDTAVYYCAA
>V68RF-AHZZ01113072.1-ighv |(329, 638)|2.24697310356|(0.998,0.953,0.664)|1
VQCEVQLVESGGGLVQPGVSLRLSCAASGFTFSSTRMNWIRQAPGKKLEWVADIKYDGSE
KYYVDSVKGRFTISRDNAKNSLSLQMNSLRAEDTAVYYCVR
>V69RF-AHZZ01117753.1-igkv |(3232, 3532)|2.994900005|(1.000,1.000,0.995)|1
ARCDIQMTQSPSSLSASVGDRVTITCRASQGISTYLNWYQQKPGKAPKLLIYAASRLESG
VPPRFSGSGSGTEFTLTISSLQPEDFATYYCLQYKSDP
>V70RF-AHZZ01117754.1-igkv |(5922, 6221)|3.0|(1.000,1.000,1.000)|1
TTGEIVMTQSPATLSLSPGERATLSCRASQSVSSYLAWYQQKPGQAPRLLIYGASSRATG
IPDRFSGSGSGTEFTLTISSLEPEDVGVYYCQQYNNWN
>V71RF-AHZZ01117754.1-igkv |(31202, 31502)|2.20621985312|(0.698,0.824,0.762)|1
TTGEIVMTQSPATLSLSPGEGATLSCRASQSVGSYLAWYQQKPGQAPKLLIHSAYFRATG
IPDRFSGSGSRTEFTLTISSLEPEDVGVYHCQQYNDLP
>V72RF-AHZZ01123648.1-ighv |(7375, 7669)|1.79562152184|(0.951,0.873,0.520)|1
AQSQVQLVQSGAEVKKPGASVKVSCKASGYTFSTYAISWVRQAPGQGLEWMGGIIPLVGI
TNYAQKFQGRDTSTSTAYMELSSLRSEDTAVYYCAR
>V73RF-AHZZ01124687.1-ighv |(302, 609)|2.68888471933|(0.987,0.973,0.827)|1
AHAQVQLVQSGPEVKQPGASVKVSCKASGYTFTSYGMNWVRQAHGQRLEWMGWINTDSGN
PTYAQGFKERFTFSMDTSISTAYLQISSLKAEDTAVYYCA
>V74RF-AHZZ01129142.1-ighv |(1012, 1321)|2.99899200002|(0.999,1.000,1.000)|1
VLSQVQLQESGPGVVKPSETLSLTCAVSGGSISSYWWGWIRQPPGKGLEWIGYIYGSGSS
TNYNPSLKSRVTISKDTSKNQFSLKLSSVTAADTAVYYCAR
>V75RF-AHZZ01130977.1-trav |(3875, 4175)|2.14579279427|(0.826,0.653,0.786)|1
FSVAQKVTQAQSSVSMPVGKAVTLNCQYETSWWSYYLLWYKQFPGKEMIFLIRQGSSEQN
ARNGRYSVNFQKAASSIALTISALQLEDSATYFCALWE
>V76RF-AHZZ01143621.1-igkv |(14221, 14507)|2.90617944683|(0.993,0.946,0.977)|1
IVMTQSPATLSLSPGERATLSCRASQSVSSRLAWYQQKPGEAPRLLIYDASSRATGIPAR
FSGSGSGTDFTLTISSLEPEDVAVYFCQQESNW
>V77RF-AHZZ01150255.1-ighv |(7064, 7379)|2.97992430843|(0.986,0.999,0.996)|1
VQCEVQLLEYGGGLVQPGRSLRLSCAVSGFTFSDHYMSWVRQAPGKGPEWVGFMRNKANG
GRTEYAASVKGRFTISRDDSKSTASLQMSSLKTEDTAVYYCAT
>V78RF-AHZZ01169213.1-igkv |(5365, 5663)|2.43648046251|(0.958,0.725,0.949)|1
TTGEIVMTQSPATLALSPGERATLSCRASQSVSSYLAWYQQKPGQAPRLLIYGASSRATG
IPDRFSGSGSGTEFTLTISSLEPEDVGVYFCLQSSNW
>V79RF-AHZZ01176978.1-igkv |(12153, 12453)|3.0|(1.000,1.000,1.000)|1
ARCDIQMTQSPSSLSASVGDKVTITCHASQGISSWLSWYQQKPGKAPKLLIYKASSLQSG
VPSRFSGSGSGTDYTLTISSLQPEDFATYYCQQDSSSP
>V80RF-AHZZ01198213.1-trav |(10234, 10524)|2.99385601037|(1.000,1.000,0.994)|1
MSRGEDVEQSLFLSVREGDISVINCTYTDSSSTYLYWYKQEPGAGLQLLTYILSNMDLKR
DQRVTVLLNKKDKHLSLRIADTQTEDSAIYFCAES
>V81RF-AHZZ01198214.1-trav |(2660, 2948)|2.13406091925|(0.964,0.915,0.628)|1
VKSQKIEQNSEALNIQEGKTATLTCNYTNYSPSYLQWYRQDPGRGPVFLLLIRENEKEKW
KERLKVTFDTTLKQSLFHITASQPADSATYLCAL
>V82RF-AHZZ01198214.1-trav |(53657, 53950)|3.0|(1.000,1.000,1.000)|1
GSGKNQVEQSPQSLIILEGKNCTLQCNYTVSPFSNLRWYKQDTGKGPISLTIMTFSENTK
SNGRYTATLDADTKQSSLHITAAQLSDSASYICVVS
>V83RF-AHZZ01198216.1-trav |(1076, 1382)|2.99798400013|(1.000,1.000,0.998)|1
VWSQQKEVEQDPGPFSVPEGATVTFNCTYSNSASQSFFWYRQDSRKEPKLLMSVYSSGNE
DGRFTAQLNRASQYISLLIRDSQLSDSATYLCAVYTQCSP
>V84RF-AHZZ01198216.1-trav |(6535, 6832)|2.97560484445|(1.000,0.982,0.995)|1
GTRAQSVTQLDSQVSVSEGVPVLLRCNYSSSVSPYLFWYVQYPNQGLQLLLKYTSGTTLV
KGINGFEAEFKKSETSFHLTKASAHVSDAAEYFCAVN
>V85RF-AHZZ01040804.1-igkv |(3190, 3490)|2.97270402421|(0.987,0.994,0.992)|-1
TTGQVILTQSPATLSLSPGERATLSCRASQSVSNYLAWYQQKPGQAPRLLIHSASSRATG
IPDRFSGSGSGTEFTLTISSLEPEDVGVYHCYQYYSGY
>V86RF-AHZZ01040804.1-igkv |(12121, 12409)|1.98964989282|(0.629,0.693,0.821)|-1
TILTQSAAFVSATPGDKVTISCKASQDIDDDMNWYQLEPGEAPKLIIKDATTLVSGIPPR
FSGSGYGTDFTLTINNVESEDAAYYFCLQHDNFP
>V87RF-AHZZ01040807.1-igkv |(28694, 28982)|1.64351511098|(0.577,0.485,0.810)|-1
TILTQSPAFVSATPGDKVTISCRAGQDIDDDMNWYQQEPGEAPKLIIKDATTLVSGIPPQ
FSGSGYGIDFTLTINSMKSEDTAYYFCQQRDNTP
>V88RF-AHZZ01040807.1-igkv |(39921, 40221)|2.99067605248|(1.000,0.991,1.000)|-1
AKCDIQMTQSPTFLSASVGDRVTIACRASQSIHKGLAWYQQKPGKAPKLLISYASNLYTG
VPSRFSGSGSGTDFTLTISSLQPEDAATYYCFQYNSYP
>V89RF-AHZZ01040808.1-igkv |(17035, 17353)|2.98960007999|(1.000,0.990,1.000)|-1
ACGDIVMTQSPDSLAVSLGERVTINCKSSQSLLYSSNNKNYLAWYQQKPGQTPKLLISWA
STRESGVPNRFSGSGSGTDFTLTISGLQAEDVAVYYCQQHYSTP
>V90RF-AHZZ01042076.1-igkv |(7808, 8108)|2.77344698269|(0.999,0.995,0.857)|-1
TRCAIQMTQSPSSLSASVGDRVTITCRASQSIGSNLAWYQQKPGKVPKLLIYAASTLQSE
VPSRFSGSGSGTDFTLTISSLQPEDVATYYCQKCDSAP
>V91RF-AHZZ01042077.1-igkv |(2202, 2517)|2.59201478609|(0.996,0.783,0.980)|-1
SSGDIVMTQTPLSLPVTLGEPASISCRSSQSLLSSNEYNYLNWYLQKPGQSPQLLIYYGS
NRASGVPDRFSGSGSGTDFTLKISRVEAEDVGVYYCMQALQTP
>V92RF-AHZZ01042078.1-igkv |(13394, 13694)|2.99383600705|(0.995,0.999,1.000)|-1
ARCDIQMTQSPSSLSASVGDRVTITCRASQNIYSNLAWYQQKPGKAPKPLIYYASSLETG
VPSRFRGSGSGTDYTLTISSLQPEDIATYYCQQYNNSP
>V93RF-AHZZ01042078.1-igkv |(35394, 35709)|2.5320581523|(0.981,0.879,0.816)|-1
SSGDVVMTQSPLTLPVTPGQPASISCRSSQSLVHSDGNTYLSWYQQKPGQPPRLLIYKVS
NRYSGVPDRFSGSGAGTDFTLKISRVEAEDVGVYYCMQGTKVP
>V94RF-AHZZ01042078.1-igkv |(45757, 46072)|2.80351606499|(0.981,0.996,0.873)|-1
SSGDIVMTQTPLSLPVTPGEPASISCRSSQSLLHSDGYTYLDWYLQKPGQSPQLLIYGGS
NRASGVPDRFSGSGSGTDFTLKISKVEAEDVGVYYCMQHRALP
>V95RF-AHZZ01042079.1-igkv |(5782, 6096)|1.98100723921|(0.959,0.827,0.624)|-1
SSGDVVLTQTPLSLPVTPGEPASISCRSSQSLLHSNGNTYLDWYLQKPGQSPRLLIYKVT
NRESGVPDRFSGSGSGTDFTLKISRVEPEDVGVYYCMQGTKAP
>V96RF-AHZZ01042080.1-igkv |(4422, 4722)|2.98960007999|(1.000,0.990,1.000)|-1
ARCDIQLTQSPSSLSASVGDRVTISCRTSQNIYSNLAWYQQKPGKTPKLLIYAASSLQSG
IPSRFSGSGSGTDFTLTISSLQPEDVATYYCQHGYGTP
>V97RF-AHZZ01042080.1-igkv |(19769, 20084)|2.47188623838|(0.985,0.737,0.969)|-1
SSGDIVMTQTPLSLPVTPGEPASISCRSSQSLLHSNGNTYLYWYLQKPGQPPRLLIYRVS
NRFSGVPDRFSGSGSGTDFTLKISRVEAEDVGVYYCMQALQNP
>V98RF-AHZZ01042080.1-igkv |(24756, 25071)|2.70403353356|(0.974,0.881,0.903)|-1
SSGDIVMTQTPLSLPVTPGEPASISCRSSQSLLHSNGNTYLHWYLQKPGQSPKLLIYGGS
NRASGVPDRFSGSGSGTDFTLKISKVEVEDVGVYYCVQAIAFP
>V99RF-AHZZ01042083.1-igkv |(18979, 19279)|2.99293200206|(0.996,0.997,1.000)|-1
ARCDIHMTQSPSSLSASVGDRVTITCRASQGITDDLAWYQQKPGETPKLLIYEASSLQSG
IPSRFSGSGSGTEFTLTISSLQLNDSATYYCQHYYSYP
>V100RF-AHZZ01042083.1-igkv |(31495, 31813)|2.6633293409|(0.982,0.871,0.891)|-1
SRGDIMMTQTPLSLPITPGEPASISCRSSQSLLDSDDGYTYLDWYLQKPGQSPQPLIYFV
SSWASGVPDRFSGSGSGTDFTLKISRVEAEDVGVYYCMQCIEFI
>V101RF-AHZZ01042084.1-igkv |(28167, 28465)|2.98532022844|(1.000,0.999,0.987)|-1
ARCDIQLTQSPSSLSASVGDRVTITCQASQGISNNLAWYQQKPGKVPKLLIYKASTLQSG
VPSRFSGSGSGTDFTLTISSLQPEDFATYYCQYGYGI
>V102RF-AHZZ01042085.1-igkv |(3468, 3783)|2.97802032645|(1.000,0.993,0.986)|-1
TSGDIVMTQTPLSLPVSPGEPASISCRSSQSLLHSDGYTYLDWYLQKPGQSPQLLIYLVS
NRASGVPDRFSGSGSGTDFTLKISRVEAEDVGVYYCEQGTQLP
>V103RF-AHZZ01042085.1-igkv |(40087, 40402)|2.59886089188|(0.961,0.867,0.852)|-1
TSGDIVMTQTPLSLPVSPGEPASISCRSSQSLLHSGGKTYLYWYLQKPGQSPQLLIREVS
NRASGVPDRFSGSGSGTDFTLKISPVEAEDVGVYYCMQGIQLP
>V104RF-AHZZ01042085.1-igkv |(49587, 49887)|3.0|(1.000,1.000,1.000)|-1
ARCDIQMTQSPSSLSASVGDRVTITCRASQGITNDLAWYQQKPGETPKLLIYEASSLQSG
IPSRFSGSGSGTDFTLTISSLQPEDFATYYCQHYYSTP
>V105RF-AHZZ01042091.1-igkv |(7298, 7613)|2.99899600001|(1.000,1.000,0.999)|-1
TSGDIVMTQTPLSLSVTPGEPASISCRSSQSLLHSNGNTYLHWYLQKPGQSPQLLIYLVS
NRASGVPDRFSGSGSGTDFTLKISRVEAEDVGVYYCMQGIQLP
>V106RF-AHZZ01042093.1-igkv |(2142, 2442)|2.12272363222|(0.877,0.593,0.949)|-1
ARCAIQMTQSPSSPSATVGDRVTTTCRVSQSINNNLAWYQQKPGKTPKLLICEASSLQSG
IPSRFSGSGSGTDFTLTISSLQSEDVATYFCQHGYSYP
>V107RF-AHZZ01042093.1-igkv |(34873, 35173)|2.99280401921|(1.000,0.993,1.000)|-1
ARCDIQMTQSPSSLSASVGDRVTITCRASQGINKELDWYQQKPGKAPTLLIYAASSLQTG
VSSRFSGSGSGTDFTLTISSLQPEDVATYYCQQDYTTP
>V108RF-AHZZ01042093.1-igkv |(53999, 54314)|2.80257612196|(0.960,0.931,0.921)|-1
SSGDIVMTQTPLSLPVTPGEPASISCRSSQSLLHSNGYTYLYWYLQKPGQSPQLLMYFAS
YRASGVPDRFSGSGSGTDFTLEISRVEAEDIGVYYCMQGTQLP
>V109RF-AHZZ01042093.1-igkv |(71557, 71872)|2.47027680789|(0.982,0.761,0.920)|-1
YSGDIVMTQTPLSLPVIPGEPASISCRSSQSLLDSDGYTCLDWYLQKPGQSPQLLIYEVS
NRASGVPDRFSGSGSVTDFTLKISRVEAEDVGVYYCMQSIEFP
>V110RF-AHZZ01042093.1-igkv |(93881, 94199)|1.93567325051|(0.794,0.796,0.553)|-1
SSGDIVMTQTPLSLLVTPGEPASVSSCRCSQSLPYRGEKTYLYWSLQKPGQSPQLLIYFV
SNRASRVPDRFSGSGSDTDFTLKISWVETEDVGIYYRMENIELP
>V111RF-AHZZ01042093.1-igkv |(102084, 102402)|2.96769025636|(1.000,0.993,0.977)|-1
SSGDIVMTQTPLSLPVTPGEPASISCRSSQSLLDSDDGNTYLDWYLQKPGQSPQLLIYEV
SNRASGVPDRFSGSGSDTDFTLKISRVEAEDVGVYYCMQSTEYP
>V112RF-AHZZ01042093.1-igkv |(120004, 120320)|2.46390692883|(0.885,0.766,0.869)|-1
TSGDILLTQTPLSLPVTPGEPASISCRSSQSLLHSNENTYLHWYLQKPGQSPQLLICEVS
NRASGVPDRFSGSGSDTDFTLKINLVEAEDVGVYYCMQTTQWP
>V113RF-AHZZ01042093.1-igkv |(124902, 125217)|2.72765187213|(0.948,0.852,0.965)|-1
SSGDIVMTQTPLSLPVTLGEPTSISCRSSQSLVYSDGKTYLHWYLQKPGQSPQLLMYLVS
NRASGVPDRFSGSGSGTDFTLKISRVEAEDVGVYYCMQTLRSP
>V114RF-AHZZ01042093.1-igkv |(128335, 128650)|2.46298142391|(0.929,0.810,0.823)|-1
SSGDIVMTQTPLSLPVIPGEPASISCRSSQSLLHSDGYTYLHWYLQKPGQSPQLLIYLGS
NCASVVPDRFSGSGSGTDFTLKISRVEAEDIGIYYRMQNLQIP
>V115RF-AHZZ01042093.1-igkv |(133001, 133301)|2.98478801933|(0.992,0.994,0.999)|-1
ARCDTQMTQSLSSLFASVGDRVTITCRASQGINNELAWYQQKPGKAPTLLLYSGSSLHTG
VPSQFSGSGSGTDFTLTISSLQPEDVATYYCRQDYTTP
>V116RF-AHZZ01042093.1-igkv |(141218, 141533)|2.52551103278|(0.989,0.771,0.946)|-1
SSGDIVMTQTPLSLPVTPGEPSSISCRSSQSLLDSYGYTNLNWYLQKPGQSPQLLIYEVS
NRASGVPDRFSGSGSGTDFTLKISKVEAEDVGVYYCMQTPQTP
>V117RF-AHZZ01042093.1-igkv |(150847, 151147)|2.99899600001|(1.000,0.999,1.000)|-1
ARCDIQMTQSPSSLSASVGDRVTITCQASQGISNNLNWYQQKPGKTPKLLIYAASSLQSG
IPSRFSGSGSGTDFTLTISSLQPEDFATYYCQQRYSAP
>V118RF-AHZZ01042093.1-igkv |(165765, 166067)|2.76683289683|(0.999,0.877,0.956)|-1
TSGDIVMTQTPLSLPVSPGEPASISCRSSQSLLHSNGNTYLHWYLQKPGQSPQLLIYEVS
NWASGVPDRFSGSGSGTDFTLKISRVEAEDVGVYYCEQG
>V119RF-AHZZ01042093.1-igkv |(173599, 173899)|2.9949000027|(0.996,1.000,0.999)|-1
ARCDIQMTQSPSALSASVGDRVTISCRASQNIYSGLAWYQQKPGKAPKLLIYDASGLQSG
IPSQFSGSGSGTDFTLTISSLQPEDSATYYCQHYYDTP
>V120RF-AHZZ01042094.1-igkv |(1120, 1438)|2.69340065147|(0.994,0.818,0.998)|-1
TSGDIVMTQTPLSLPVTPGEPASISCRSSQSLFNSDYANTYLDWYLQKPGQSPQLLIYML
SNRASGVPDRFSGSGSGTDFTLKISRVEAEDVGVYYCMQSIEYP
>V121RF-AHZZ01044061.1-trav |(5488, 5785)|2.68533707447|(0.931,0.822,0.995)|-1
GLRAQLVTQPEDQVTVAERNPLTVKCTYSVSGNPYLFWYVQYPNQGLQFLLKYITGDNLV
KGSYGFEAEFNKSQTSFHLKKPSALVSDSALYFCAVR
>V122RF-AHZZ01044067.1-trav |(5751, 6054)|1.88466214486|(0.761,0.670,0.593)|-1
MCLVLVTTGQNIDQPTEMTAMEGAIVQINCTYQTSGFNGLSWYQQHDGEAPTLLSYNVLD
GLEEKGRFSSFLSNSKRYSYLLLKELQVKDSASYLCAVR
>V123RF-AHZZ01044070.1-trav |(1428, 1737)|1.76748087817|(0.863,0.765,0.532)|-1
TIMYLAIGTAGQSLEQPSEVTAVEGAIVQINCTYQTSRFDGLSWYQQRDGGAPTFLSYNA
LDGLEERGHFSSFLSRSDSYGYLLLQELQMKDSASYFCAVR
>V124RF-AHZZ01067647.1-trbv |(19172, 19469)|2.63417588067|(0.988,0.992,0.794)|-1
PLEAQVTQNPRYLITVTGKKLTVTCSQNMNHDYMSWYRQDPGLGLRQIYYSSNVELVDKG
DIPEGYNVSRKEKRNFPLILESPSPSQTSLYFCASSL
>V125RF-AHZZ01067647.1-trbv |(24494, 24801)|2.99393200206|(0.999,1.000,0.995)|-1
LVDVKVTQSSRYLIKRTGEKVFLECVQDMDHERMFWYRQDPGLGLRLIYFSYDVKVNEKG
DIPEGYSVSREKKERFSLILGSASTNQTSMYLCASSLSTA
>V126RF-AHZZ01067647.1-trbv |(37999, 38302)|2.47765618398|(0.892,0.743,0.935)|-1
SVFSAVVSQKPSRDVCQRGTSVTIQCQVDSQLTMMFWYRQQPGLSMTLIATANQGSEATY
ESGFVIDKFPISRPNLTFSTLTVSNTNPEDSSIYLCSVE
>V127RF-AHZZ01067648.1-trbv |(3732, 4029)|2.97241612211|(0.989,1.000,0.984)|-1
LMEADIYQNPRHRVIGTGKKITLECSQTMGHDKMYWYQQDPGMELHLIHYSYGVNSTERG
DFSSESTVSRIRIEHFPLTLESTSPSHTSQYLCASSE
>V128RF-AHZZ01067649.1-trbv |(1785, 2085)|2.99598000014|(0.999,0.997,1.000)|-1
HAEAGVSQDPRHKITKTGQNVSFKCVPISEHNRLYWYRQTLGQGPEFLTYFQNEAQQDRS
GLFSDRFSAERPEGSISTLMIQHTEQGDSAVYLCASSL
>V129RF-AHZZ01067649.1-trbv |(16676, 16973)|2.99899600001|(1.000,1.000,0.999)|-1
HMDAGITQSPRHKITETGTPVTLRCHQTENHRYMYWYRQDLGNGLRLIHYSYGVEDTDKV
EISDGYSVSRSKTEDFLLTLESATRSQTSVYFCASSE
>V130RF-AHZZ01067649.1-trbv |(28030, 28318)|2.23877662589|(0.926,0.655,0.913)|-1
GVTQSPRYKITEKKQPVAFWCNPISGHNTLYWYRQNLGQGPELLIRYENEEAVDDSRFPK
DRFSAERLKGVDSTLKIQPAELGDSAVYLCASSL
>V131RF-AHZZ01067649.1-trbv |(33773, 34073)|2.29967165214|(0.812,0.719,0.803)|-1
HTDAGVIQSPRHEVTEMGKEVTLRCEPISGHSSLFWYRQSMMRGLEFLIYFNNKSPIDDS
GMPKDRFSATMPNASFSTLKIQPSEPRDSAMYFCASSL
>V132RF-AHZZ01067649.1-trbv |(37056, 37356)|2.62932817251|(0.949,0.876,0.858)|-1
HTDAGVIQSPRHEVTEMGKEVTLRCEPISGHTYLFWYRQSMMQGLEFLIYFNDKSPIDDS
GMPKDRFSATMPNASFSTLKIQPSEPRDSAVYFCASSL
>V133RF-AHZZ01067649.1-trbv |(52456, 52756)|2.24006829526|(0.777,0.947,0.670)|-1
LIDAGVTQTPRHKVTEMGQEVTMRCQPILGHNTVFWYRQTVMQGLELLVYLRNKASLDDS
GMPKDRFSAEMPDASLATLKIQPSEPRDSAVYLCASGL
>V134RF-AHZZ01067649.1-trbv |(59401, 59701)|2.88273348784|(0.987,0.989,0.923)|-1
HTEAGVTQFPSHRVIEKGQTVTLRCDPISGHDYLYWYRRVMGKEIKFLIYFMRASVQDES
GMPNKRFSAERTGGTYSTLKVQPAELEDSGVYFCASSQ
>V135RF-AHZZ01067649.1-trbv |(64509, 64806)|1.58636603412|(0.918,0.611,0.639)|-1
HGDVMVIQNPRYQVTQLEKPVTLSCSQNLNHKVMYWYQQKPSQAPKLLFHYYDKDFNNEA
DTPDNFQSRRPNTSFCFLDIRSPGLEDAAVYLCASSK
>V136RF-AHZZ01067649.1-trbv |(69483, 69783)|2.92432267628|(0.989,0.985,0.955)|-1
SPGEEVTQTPKHLVKGEGQKAKLYCDPIKGHSYVFWYQQVLRKEFKFLISFQNKNVFDET
GMPKERFSAKCPANSPCSLEIQATKLKDSAVYFCASSQ
>V137RF-AHZZ01067649.1-trbv |(89894, 90191)|2.96485291224|(0.998,1.000,0.970)|-1
TVDGGITQSPKYLFRKEGQNVTLSCEQNLNHDAMYWYRQDPGQGLRLIYYSQIVNDIQNG
DIAEGYSVSRDRKESFPLTVTSAQRNPTAFYLCASSI
>V138RF-AHZZ01067649.1-trbv |(108243, 108543)|2.66434446456|(0.971,0.811,0.980)|-1
SADTKVTQRPRLLVKANEQKAKMDCVPVKGHSYVYWYRKKLDEELKFLVYFQNEEIIQKA
EIINERFSAQCPQNSPCTLEIQSTESGDAALYFCASSK
>V139RF-AHZZ01067649.1-trbv |(117153, 117458)|2.4068861632|(0.980,0.884,0.758)|-1
SFHAEVTQTPGYLVKGKGQKTKIDCTPEKGHTYVYWYQQNQNKEFTFLISFQDEQVLQET
ELHKKRFSSQCPKNLPCSLEIPSSEPGDTALYLCASSQST
>V140RF-AHZZ01067649.1-trbv |(129327, 129625)|2.97475601537|(0.988,0.993,0.994)|-1
SMDADVTQTPRNSIAKTGKRIMLECSQTKGHDQMYWYRQDPGLGLRLIFYSFDVEDINKG
EISDGYSASRQEQAKFSLSLESATPNQTALYFCATSD
>V141RF-AHZZ01067651.1-trbv |(1632, 1932)|3.0|(1.000,1.000,1.000)|-1
HTGAGVSQSPRYKVTKRGQDVALRCDPISGHDYLYWYQQALGQGPELLTYFNYEAQQDKS
GLPNDRFSADRPEGSVSTLKIQRTEQRDSAVYLCASSL
>V142RF-AHZZ01067651.1-trbv |(6692, 6982)|2.91354824291|(0.995,0.979,0.949)|-1
DAGVTQSPTHLIKMRGQQVTLRCSPISGHTSVSWYQQALGQGPQLIFEYDRKEERVRGNF
LDRFSGRQFPNYSSELNVNASEMGDSALYLCASSL
>V143RF-AHZZ01067651.1-trbv |(13303, 13600)|2.99799200002|(1.000,0.999,0.999)|-1
PGNAGVTQTPKFQILKTGQSMTLQCAQDMNHNYMSWYRQDPGVGLRLIHYSVGAGVTDKG
EVSNGYNVSRLNTEDFPLSLESAASSQTSVYFCASSY
>V144RF-AHZZ01067651.1-trbv |(19186, 19496)|2.09907332273|(0.822,0.617,0.815)|-1
HTGAGVSQFPRYRVTKRGQDVTLRCDPISGHEYLSWYQQAPGQGPEFLTYFQNDAQLDKS
GLPSDRFSAARPEGSVSTLKIQRTEQGDSAVYLCASSLATA
>V145RF-AHZZ01067651.1-trbv |(27974, 28285)|2.48378673554|(0.844,0.787,0.868)|-1
PVEPGVTQSPTHLIKTRGQQVILRCSPISGHSSVYWYQQALGQGPQFIFEYCQKEERGRG
NFPDRFSGRQFPNYSSELNVSALLLGDSALYLCASSLAQPAE
>V146RF-AHZZ01067651.1-trbv |(47891, 48187)|3.0|(1.000,1.000,1.000)|-1
PVDAGVTQSPTHLIKTRGQQVTLRCSPISGHTSVYWYQQALGQGPQFIFQYYEKEERERG
NFPDRFSGRQFPNYSSELNVSALLLGDSALYLCASSL
>V147RF-AHZZ01067651.1-trbv |(55192, 55483)|2.9743601679|(0.997,0.993,0.985)|-1
NADVTQTPKFRVLKTGQSMIVQCAQDMKHDYMFWYRQDPGMGLRLIYYSVTAGITTKGEV
PNGYNVSRINTEDFLLRLESAALSQTSVYFCASSY
>V148RF-AHZZ01067651.1-trbv |(59487, 59787)|2.99796800026|(0.998,1.000,1.000)|-1
HTGAGVSQSPRYKVIKKGQDVALRCDPISGHAALYWYQQALGQGPEFLTYFNYQAQPDKS
GLPNDRFSAERSEGSVSTLTIQRTEQQDSAVYLCASSL
>V149RF-AHZZ01067651.1-trbv |(68255, 68551)|2.22466192003|(0.939,0.886,0.667)|-1
PVIAGVAQSPTHLIKTRGQQVTLRCSPISGHNTVYWYQQALGQGPQLIFQYYRGEDRGRG
NFPERFSGHQFPNYSSELNVSALLLGDSALYLCASSL
>V150RF-AHZZ01067652.1-trbv |(695, 992)|3.0|(1.000,1.000,1.000)|-1
PVNAGVTQTPKFQVLKTGQSMTLQCAQDMNHDCMYWYRQDPGMGLRLIHYSVGEGSTDKG
EVPDGYNVTRSNTEDFPLRLESAAPSQTSVYFCASSY
>V151RF-AHZZ01067652.1-trbv |(5225, 5525)|2.99596000066|(1.000,0.999,0.997)|-1
HTGAGVSQSPRYKVTKRGQDVALRCDPISGHDYLYWYQQAPGQGPEFLTYFQNDAQRDKS
GLPNDRFSAERTEGSVSTLKIQRTEQADSAVYLCASSL
>V152RF-AHZZ01067652.1-trbv |(13142, 13432)|2.25674440155|(0.908,0.866,0.679)|-1
DAGVTQSPTHLIKTRGQQVTLRCSPISGHTSVSWYQQALGQGLQFILWYDEEEERGRGTF
PHRFSGHQFPNYSSELNVNASEVGDSALYLCASSL
>V153RF-AHZZ01067652.1-trbv |(18432, 18743)|2.58375035998|(0.898,0.939,0.795)|-1
NAGVTQTPKFQVLKTGQSMTLQCAQDMSHNWYRQHPGMGLRLIRYSAAADVTDKGEVPSG
YNVSRLNTEDFPLRLESAASSQTSVYFCASSYSPTLQGHLLS
>V154RF-AHZZ01067652.1-trbv |(24517, 24817)|2.99396400065|(0.999,0.999,0.996)|-1
HTGAGVSQSPRYKVTKRGQDVALRCDPISGHVALYWYQQALGQGPEFLTYFQNDAQPDKS
GLPSDRFSAERPEGSVSTLKIQRTQQGDAAVYLCASSL
>V155RF-AHZZ01067652.1-trbv |(35002, 35298)|2.68405999734|(0.972,0.829,0.962)|-1
SVDGGVTQSPRHLIKTTGQQVTLRCSPISGHTSVSWYQQALGQGPQFIFEYYEEKERERG
NFPDRFSGHQFPNYSSELNVNALEAGDSALYLCASSL
>V156RF-AHZZ01067652.1-trbv |(38310, 38607)|2.9731803079|(0.997,0.994,0.983)|-1
LVNAGVTQTPKFQVLKTGQSMTVQCAQDMNYNFMYWYRQDPGVGLRLIHYSGAAGTTDKG
EVPSGYNVSRLNTEIFPLRLESAAPSQTSVYICASSY
>V157RF-AHZZ01067652.1-trbv |(42887, 43187)|2.95487637781|(0.998,0.995,0.966)|-1
HTGARVSQSPRYKVTKRGQDVALRCDPISGHDYLYWYQQALGQGPELLTYFSYEAQQDKS
GLPSDRFSAERPEGSVSTLKIQRTQQWDSAMYLCASSL
>V158RF-AHZZ01067652.1-trbv |(53188, 53484)|2.16924919661|(0.991,0.862,0.688)|-1
SVDAGVTQSPTHLIRKRGQQVTLRCSPISGHNTVSWYQQALGQGPQFIFQYYEKEERGRG
NFPDRFSGHQFPNYSSELNVNASEMGDSALYLCASSL
>V159RF-AHZZ01067653.1-trbv |(5340, 5640)|2.985900005|(0.997,0.997,0.992)|-1
HTGAGVSQSPSNKVTEKGKDVVLRCDPISGHAVLYWYRQNLGQGLEFLIYFQGKGAVDDS
GLCSDRFSATRPEGSASTLKIQHTEQGDSAMYFCASSL
>V160RF-AHZZ01067653.1-trbv |(10391, 10687)|2.62083299139|(0.945,0.871,0.857)|-1
SVDTGVTQSPTHLIKTRGQQVTLRCSPISGHNTVSWYQQTPGQGPQFIFEYANELRTSEG
NFPHRFSGRQFRDYHSEMNVSALELGDSALYLCASSL
>V161RF-AHZZ01067653.1-trbv |(13070, 13360)|2.97632022844|(0.997,0.984,0.996)|-1
DCGVTQTPKHLITAIGQQVTLRCSPRSGDLSVYWYQQSLGQGLQFLIQYYNGEERAKGNI
LERFSAQQFPDLHSELNLSSLELGDSALYFCASSL
>V162RF-AHZZ01067653.1-trbv |(30671, 30959)|2.14448733578|(0.941,0.805,0.691)|-1
GVAQSPRYKITEKSQAVAFWCDPISGHATLYWYRQILGQGPELLVRFQNKGVVDDSQLPK
DRFSAERLKGVDSTLRIQPAELGDSAVYLCASSL
>V163RF-AHZZ01067653.1-trbv |(43250, 43547)|2.29556671058|(0.900,0.656,0.972)|-1
HRDAEITQSPRHKVTETGRQVTLTCHQTWNHNNMFWYRQDLGHGLRLIYYSAGASIIDKG
EVPDGYVVSRSKTEDFPLTLESATRSQTSVYFCASSE
>V164RF-AHZZ01067653.1-trbv |(52371, 52659)|2.45160860301|(0.912,0.877,0.758)|-1
GVAQSPRYKVIEKSQAVTFWCNPVSGHATLYWYRQILGQGPELLVQFRNNDVVDDSQLPK
DRFSAERLKGVNSTLKIQPAELGDSAVYLCASSL
>V165RF-AHZZ01067655.1-trbv |(10936, 11249)|2.99185201038|(0.999,1.000,0.993)|-1
SLDTAVSQTPKYLVTQTGKNESLKCEQNLGHNAMYWYKQDSKKLLKIMFIYNNKEPILNE
TVPNRFSPKSPDKAHLNLHIKSVELGDSAVYFCASSQDTALQ
>V166RF-AHZZ01067655.1-trbv |(14360, 14657)|2.49953851943|(0.850,0.983,0.764)|-1
PMDTGVTQTPRHLVMGMTNKKSLKCEQHLGHNAMYWYKQKAKKPPELMFIYNFKEPAENN
SVPSRFVPECPDSSLFYLHLRALQPEDSALYLCASSQ
>V167RF-AHZZ01067655.1-trbv |(26234, 26531)|2.99280401921|(1.000,1.000,0.993)|-1
LVNAGVTQTPKFQVLKTGQNMTLKCAQDMNHDRMYWYRQDPGMGLRLIHYSAGEGSTEKG
EVSNGYNASRLNKKDFLLRLESAAPSQTSMYFCASSE
>V168RF-AHZZ01067655.1-trbv |(28925, 29222)|2.99696400065|(1.000,1.000,0.997)|-1
PVNAGVTQTPKFQILKTGQNMTLKCAQDMNHNYMYWYRQDPGMGLRLIHYSAGEGSTEKG
EVPDGYNASRLNPQNFLLRLESAAPSQTSMYFCASSE
>V169RF-AHZZ01067655.1-trbv |(32665, 32965)|3.0|(1.000,1.000,1.000)|-1
HTGAGVSQSPRNKVTEEGKDVVLRCDPISGHTALYWYRQSLGKGLEFLIYFQGNDAPDKS
GLPSGRFSAERTEGSVSTLKIQRTEQGDSAVYLCASSL
>V170RF-AHZZ01067656.1-trbv |(7788, 8088)|1.90020480121|(0.915,0.947,0.515)|-1
HTEPEVTQTPSHQVTQMGQEVILRCVPISNHFYFYWYRQILGQKVEFLVSFVNDEISDKS
EMFDDRFSVGRSDGSNFTLKIKSTKLEDSAMYFCASSE
>V171RF-AHZZ01067656.1-trbv |(14292, 14589)|2.99799200002|(1.000,0.999,0.999)|-1
PLDTAVFQTPKYLVTQTGKKESLKCEQNLGHDTMYWYKQDSKKLLKIMFIYSNKEPILNE
TVPNRFSPDSPDKAHLNLHIKSVELGDSAVYFCASSQ
>V172RF-AHZZ01067656.1-trbv |(18626, 18923)|2.99799600001|(0.999,1.000,0.999)|-1
PTDTGVTQTPKHLVMGMTNKKSLKCEQHLGHNAMYWYKQKAKKPPELMFIYNYEKLSINE
SVPSRFSPECSKSSLLYLHLRALQPEDSALYLCASSQ
>V173RF-AHZZ01067656.1-trbv |(37172, 37469)|3.0|(1.000,1.000,1.000)|-1
PANADVTQSPKFQILKTGQSMTLQCAQDMNHNSMYWYRQDPGMGLRLIHYSATKDTTDPG
EVPDGYSVSRLNKKEFLLKLESAAPSQTSVYFCASSE
>V174RF-AHZZ01067659.1-trbv |(1943, 2234)|2.28453520713|(0.959,0.948,0.667)|-1
PEVTQTPSHQVTQMGQEVILRCVPISNHLYFYWYRQILGQKVEFLVSFYNGKISEQSEIF
DDRFSVGRSDGVHFTLKIKSTKLEDSAMYFCASSE
>V175RF-AHZZ01069458.1-ighv |(21609, 21918)|2.97339727933|(0.998,0.999,0.978)|-1
VQCEVQLVESGGGLVQPGASLRLSCEASGFTFGDYAMSWVHQAPGKGLEWVSSISYTGKN
IYYADSVKGRFTISRDNAKNSLSLQMNSLKTEDTAVYYCTR
>V176RF-AHZZ01069458.1-ighv |(26822, 27131)|3.0|(1.000,1.000,1.000)|-1
VQCEVQLVESGGGLVQPGGSLRLSCAASGFTFSSYDMSWVRQAPGKGLEWVSYISNGGGS
TYYADSVKGRFTISRDNSKNTLSLQMNSLRAEDTAVYYCAK
>V177RF-AHZZ01069461.1-ighv |(27499, 27811)|2.99054805197|(0.992,1.000,0.999)|-1
VLSQVQLQESGPGLVKPPETLSLTCAVSGGSISDSYYWSWIRQPPGKGLEWIGYIYGGSG
STSYNPSLKSRVTLSVDTSKNQFSLKLSSVTAADTAVYYCAR
>V178RF-AHZZ01084887.1-ighv |(16319, 16625)|2.52949920139|(0.977,0.974,0.756)|-1
CAEVQLVQSGAEVKRPGESLRISCKTSGYSFTSYWISWVRQMPGKGLEWMGMIDPSDSDT
RYSPSFQGQVTISADKSISTAYLQWSSLKASDTATYYCAR
>V179RF-AHZZ01084890.1-ighv |(9388, 9701)|2.99899600001|(1.000,1.000,0.999)|-1
VQCEVQLVESGGGLVQPGGSLRLSCAASGFTFSNSWMNWVRQAPGKGLEWVARIKSKADG
ETADYAASVKGRFTISRDDSKNTLYLQMNSLKTEDTAVYYCT
>V180RF-AHZZ01084890.1-ighv |(28760, 29069)|2.65248889646|(1.000,0.801,0.998)|-1
VQGEVQLVESGGGLAKPGGSLRLSCAASGFTFSNYWMYWVRQAPGKGLEWVSAINTGGGS
TYYADSVKGRFTISRENAKNTLYLQMNSLRAEDTAVYYCAK
>V181RF-AHZZ01084892.1-ighv |(6822, 7131)|2.18076074898|(0.989,0.989,0.621)|-1
VQCEVKLVESGGGLVQPGGSLRLSCAISGFTFSNYWMFWVRQAPGKGLEWVSSISGSSSS
TYYPDSVKGRFTISRDNAKNTLYLQMNSPRAEDTAVYYCAR
>V182RF-AHZZ01084892.1-ighv |(16134, 16440)|2.81996754444|(0.918,0.932,0.993)|-1
VQCEVQLVAYGGGLQQPGGSLRLSCGFTFSDHYMSWIRQAPGKGPEWVGFMRNKANGGTT
EYATSVKGRFTISRADSKSMASLQMSSLNTEDTAVYYCAR
>V183RF-AHZZ01084892.1-ighv |(32791, 33100)|2.98421230726|(1.000,0.999,0.986)|-1
VQCEVQLVESGGGLVQPGGSLRLSCAASGFTFSDYWMDWVRQAPGKGLEWVSSVSGSSSN
TYYPDSVKGRFTISRENAKNTLYLQMNSLRAEDTAVYYCAR
>V184RF-AHZZ01084893.1-ighv |(12328, 12643)|3.0|(1.000,1.000,1.000)|-1
VQCEVQLVESGGGLVQPGRSLRLSCAASGFTFSNYYMDWVRQAPGKGLEWVGRIRNKANS
YTTEYAASVKGRFTISRDDSKNTLYLQMSSLKTEDTAVYYCAR
>V185RF-AHZZ01084896.1-ighv |(1010, 1319)|2.44340179796|(0.977,0.971,0.723)|-1
VCAEVQLVQSGAEVKRPGESLRISCKTSGYSFTGSWISWVRQMPGKGLEWMGSIYPGDSD
TRYNPSFQGQVTISADKSISTAYLQWSSLKASDTATYYCAK
>V186RF-AHZZ01089506.1-iglv |(19553, 19862)|2.22157924939|(0.979,0.630,1.000)|-1
SWAQSVLTQPPSASEAPGQRVTISCSGSSSNIGSNYVNWYQQLEGKAPKLLIYNNNQRPS
GVPDRFSGSKSGTSASLTISGLQSEDEADYYCAAWDNSLNG
>V187RF-AHZZ01089506.1-iglv |(37855, 38165)|2.98003640693|(1.000,0.985,0.996)|-1
SLSQPVLTQPASLSASPGASARLTCTLSSGINVGSYRIYWYQQKPGSPPRYLLNYYSDSD
KDQGSGVPSRFSGSKDASANAGLLLISGLQSEDEADYYCAI
>V188RF-AHZZ01089506.1-iglv |(48570, 48877)|2.96886989205|(1.000,0.978,0.993)|-1
SWAQSVLTQPPSVSAAPGQKVTISCSGSSSNIGSKYVSWYQQLPGTAPKLLIYDNNKRPS
GISDRFSGSKSGTSATLAITGLQTGDEADYYCAAWDNSLS
>V189RF-AHZZ01089506.1-iglv |(53590, 53897)|2.99698000014|(1.000,0.999,0.998)|-1
SWAQSVLTQPPSVSGDPGQRVTISCTGSSSNIGGYYVYWYQQLPGTAPKLLIYDNNKRPS
GVSDRFSGSKSGTSASLTITGLQPGDEADYYCGAWDSSLS
>V190RF-AHZZ01089506.1-iglv |(59408, 59715)|2.98574403277|(0.998,0.998,0.990)|-1
SRAQSVLTQPPSVSGAPGQKVTISCTGSSSNIGGYNVYWYQQLPGTAPKLLIYDNNKRPS
GISDRFSGSKSGTSASLAITGLLPEDEADYYCQSYDSSLS
>V191RF-AHZZ01089506.1-iglv |(83472, 83782)|2.45699879873|(0.996,0.972,0.733)|-1
SLSQPVLTQPASLSASPGASASLTCTFSGGINVAGYYIYWYQQKPGSPPRYLLRYKSDSD
KGQGSGVPSRFSGSKDASANTGILRISGLQSEDEADYYCAI
>V192RF-AHZZ01089506.1-iglv |(88028, 88337)|2.99396400065|(0.997,0.997,1.000)|-1
SWAQSVLTQPRSASEAARKSVTISCSGSSSNIGSNSVSWYQQLPGTAPKLLIYYNDQRAS
GVSDRFSGSKSGTSASLAISGLQTEDEADYYCTAWDDSLSG
>V193RF-AHZZ01089507.1-iglv |(5814, 6121)|1.94883690572|(0.788,0.768,0.569)|-1
SNSQAVVTQEPSMTVSPGGTVTLTCASSTGAVTSGNYPNWFQQKPGQAPRTLIYNTNSKY
SWTPARFSGSLAGGKAALTLSGAQPEDEAEYYCLLYYSGA
>V194RF-AHZZ01089507.1-iglv |(10483, 10793)|2.24976842256|(0.982,0.972,0.651)|-1
SLSQPVLTQPASLSASPGASASLTCTFSGGINVAGYYIYWYQQKPGSPPRYLLWYKSDSD
KGQGSGVPSRFSGSKDASANTGILRISRLQSEDEADYYCAI
>V195RF-AHZZ01089507.1-iglv |(15336, 15645)|2.26166793909|(0.997,0.984,0.655)|-1
SWAQSVLTQPPSASGAPGQSVTISCSGSSSNIRGNGVHWYQQLSGTAPKLLIYNNNQRPS
GVPDRFSGSKSGTSASLAITGLRPEDEADYYCEAWDDSLSG
>V196RF-AHZZ01089508.1-iglv |(4484, 4790)|1.5801430979|(0.513,0.839,0.680)|-1
SLSQPVLTQPPSASASLGASVTLTCTLSSGYSNYAVDWHQQRPGKGPQFVMRVGTGGIVG
SKGDGIPDRFSGSGSGLNRYLTIKNTQEEDESDYHCGADH
>V197RF-AHZZ01089508.1-iglv |(11286, 11596)|2.74989965254|(0.997,0.866,0.959)|-1
SLSQPVLTQPTSLSASPGASARLTCTLRSGISVGSYRIFWYQQKPGSPPRYLLWYKSDSD
KHQGSGVPSRFSGSKDASANAGILLISGLQSEDEADYYCTT
>V198RF-AHZZ01089508.1-iglv |(16094, 16403)|2.99174403277|(1.000,0.992,1.000)|-1
SWAQSVLTQPPSASGAPGQRVTISCSGSSSNIGSNNVYWYQQFPGTAPKLLIYYSNQRPS
GVPDRFSGSKSGTSASLAITGLRSEDEADYYCAAWDDSLSS
>V199RF-AHZZ01090491.1-ighv |(1149, 1458)|2.99385601037|(1.000,1.000,0.994)|-1
VQCEVQLVESGGGLVKPGASLRLSCAASGFTFSSYGMHWVRQAPGKGLEWVSSISSDSSY
IYYADSVKGRFTISRDNAKNSLSLQMNSLRAEDTAVYYCAR
>V200RF-AHZZ01090492.1-ighv |(8844, 9153)|2.6937803975|(0.997,0.962,0.837)|-1
AHSQVQLVQSGAEVKKPGSSVKVSCKASGYTFTDYYMHWVRQAPGQGLEWMGEINPKTGG
TNYAQKFQGRVTMTRDTSTSTAYMELSSLRSEDTAVYYCAT
>V201RF-AHZZ01090492.1-ighv |(11745, 12060)|2.97337780343|(0.980,0.996,1.000)|-1
VQCEVQLVESGGGLVQPGGSLRLSCAASGFTFSNHCMSWVRQAPGKGPEWVGLIRNKANG
GRAEYAASVKGRFTISRDDSKSIASLQMNSLKTGDTAVYYCTR
>V202RF-AHZZ01090494.1-ighv |(1969, 2281)|2.98885201038|(0.994,0.995,1.000)|-1
VLSQVKLQESGPGLVKPSETLSLTCTVSSGSISDSYYWSWIRQAPGKGLEWIGRIYSSGS
STNYNPSLKNRVTISTDTSKNQFSLKLSSVTAADTAVYYCAR
>V203RF-AHZZ01090495.1-ighv |(1255, 1564)|2.75252039729|(0.957,0.982,0.856)|-1
AQSQVQLVQSGAEVKKPGASVKLSCKASGFTFISYAISWVRQAPGQGLEWMGEIIPAFGI
ADYAQKFQGRVTITADTSTSTAYMELSSRRSEDTAVYYCAR
>V204RF-AHZZ01093946.1-trav |(12355, 12645)|2.95519216959|(0.986,0.975,0.995)|-1
VSSEDKVMQNPLSLVVHEGDTVTLNCSYEVVNFQSLLWYKQEKKAPTFLFTLTSSGIEKK
SGRLSSILDKKDFFSILNITATQTRDSAVYLCAVE
>V205RF-AHZZ01093949.1-trav |(3892, 4191)|2.92723664903|(0.990,0.991,0.952)|-1
VNGQQIMQIPQYQHVQEGEDFTTYCNSSTTLNNIQWYKQRPGGHPVFLIMLVKSGEVKKQ
KRLTFQFGEAKKNSSLHITATQTTDVGSYFCAGHSAPQ
>V206RF-AHZZ01093949.1-trav |(14852, 15142)|2.13492007723|(0.883,0.610,0.901)|-1
TIIDAKTTQPTSMDCAEGRAANLPCNHSTIGGNEYIHWYRQIHSQGPQYVIHGLKNNETN
AMASLIITEDRKSSTLILPHATLRDTAVYYCIVRV
>V207RF-AHZZ01093949.1-trav |(55719, 56027)|2.04702387486|(0.786,0.627,0.739)|-1
VNSQQKNDDQQVKQNPPSLSVQEGGISILNCDYTNSMFDYFLWYKKYPAEGPTFLISISS
VKDKNEEGRFTVFLNKSAKHLSLHIRASQPGDSAVYLCAAR
>V208RF-AHZZ01093949.1-trav |(61192, 61479)|2.37016112853|(0.819,0.737,0.843)|-1
VRSQKPVQSPQVVILQEGEDAIINCNSSKALYSVHWYRQKHGEAPVFLMILLKGGEQKSH
DKIVATFNEKKQQSSLYLMASQLSYSRTYFCGAE
>V209RF-AHZZ01093949.1-trav |(89299, 89586)|2.12378643771|(0.680,0.721,0.887)|-1
VSSQELEQSPQSLIVQEGKNLTINCTSSKTLYGLHWYKQKYGEGLIFLIMLQQGGEEKSH
EKITAKLDEKKQQSFLHITASQPSHAGIYLCGGD
>V210RF-AHZZ01093953.1-trav |(7506, 7806)|2.43956463016|(0.901,0.795,0.816)|-1
SSVAQKVTQAQSSVSMPVGKAVTLNCQYETSSWSYDLFWYKQPPSKEMIFLIRQGYSEQN
ARNGRYSVNFQKAASSIALTISALQLEDSATYFCALRE
>V211RF-AHZZ01096568.1-ighv |(3158, 3467)|3.0|(1.000,1.000,1.000)|-1
VLSQVQLQESGPGLVKPSETLSLTCAVSGGSISSSYWNWIRQAPGKGLEWIGRIYSSGSS
TNYNPSLKNRVTISTDTSKNQFSLKLSSVTAADTAVYYCAR
>V212RF-AHZZ01096568.1-ighv |(16270, 16579)|2.99385601037|(1.000,0.994,1.000)|-1
VQGEVQLVESGGGLAKPGGSLRLSCAASGFTFSSYGMSWVRQAPGKGLEWVSAISSGGGS
TYYADSVKGRFTISRDNSKNTLSLQMNSLRAEDTAVYYCAK
>V213RF-AHZZ01096572.1-ighv |(422, 737)|2.98489600501|(0.993,0.994,0.998)|-1
VQCEVQLVESGRGLVQPGGSLRLSCAVSGFTFSDHYMSWVRQAPGKGPEWVGFMRNKANG
GRTEYAASVKGRFTISRDDSKSTPSLQMSSLNTEDTAVYYCAR
>V214RF-AHZZ01096574.1-ighv |(7206, 7516)|2.994900005|(1.000,1.000,0.995)|-1
VQCEVQLVESGGGLAQPGGSLRLSCVASGFTFSDHYMDWVRQAPGKGLEWVSSISTGSGS
TTLYPDSVKGRFTISRDNAKNTVYLQMNSLRAEDTAVYYCA
>V215RF-AHZZ01096575.1-ighv |(832, 1141)|2.97564005313|(0.996,0.993,0.987)|-1
AHSEVQLVQSGAEVRKPGATVKISCKASGYTFTDYYLSWVRQAPGKGLEWMGCVDPEDGE
AIYAQKFQGRVTITADTSTDTAYMELSSLRSEDTAVYYCAR
>V216RF-AHZZ01103093.1-ighv |(4113, 4425)|2.83434858657|(0.940,0.916,0.991)|-1
VLSQVQLQESGPGLLKPSETLSLTCAISGGSISSSYHYWSWIRQAPGKGLEWIGYISYSG
STNYNPSLKSRVTISTDTSKNQFSLKLSSVTAADTAVYYCAR
>V217RF-AHZZ01103093.1-ighv |(19002, 19311)|2.45687132234|(0.991,0.998,0.721)|-1
VLSQVQLQESGPGLVKPSETLSLTCAVSGYSISSGYYWGWIRQPPGKGLEWIGSIYSSGS
NYLNPSLKSRVTLSVDTSKNQFSLKLSSVTAADTAVYYCAR
>V218RF-AHZZ01103094.1-ighv |(666, 977)|2.99696400065|(1.000,1.000,0.997)|-1
VQCEVQLVESGGGVVQPGGSLRLSCAASGFTFDDYAMGWVRQAPGKGLEWVSAISWSGGS
TGYADSVKGRFTISRDNAKNSLYLQMNRLRAEDTALYYCAKD
>V219RF-AHZZ01103097.1-ighv |(667, 978)|2.99799600001|(0.999,1.000,0.999)|-1
VQCDVQLVESGGGLVKPGGSLRLSCVASGFTFSSYEMHWVRQAPGKGLEWVSGISTSGGT
TYYADSVKGRFTISRDNAKNSLFLQMNSLRAEDTAVYYCAKE
>V220RF-AHZZ01103097.1-ighv |(4629, 4936)|2.41712786625|(0.972,0.949,0.721)|-1
VLSQVQLQESGPGVVKPSETLSLTCAVSGYSISSGYYWGWIRQPPGKGLEWIGSIYSSGS
NYLNPSLKSRVTLSVDTSKNQFSLKLSSVTAADTAVYYCA
>V221RF-AHZZ01103258.1-ighv |(1265, 1574)|2.99494800078|(1.000,0.998,0.997)|-1
VLSQVQLQESGPGLVKPSETLSLTCAVSGGSISSNYWNWIRQAPGKGLEWIGSIYSSGSS
TNYNPSLKNRVTISTDTSKNQFSLKLSSVTAADTAVYYCAR
>V222RF-AHZZ01104243.1-igkv |(7682, 7981)|2.99088400513|(0.998,0.993,1.000)|-1
TTGEIVLTQSPATLSLSPGERATLSCRASQSVSSSLAWYQQKSGQAPRLLIYGASSRATG
IPDRFSGSGSGTDFTLTISILEPEDVAVYYCQQYYNWN
>V223RF-AHZZ01105198.1-iglv |(1704, 2007)|2.99698000014|(1.000,0.998,0.999)|-1
SWAQSALTQPRSVSGSPGQSVTISCTGTSSDIGGYNYVSWYQQHPGKAPKLMIYDVSKRP
SGVSDRFSGSKSGNTASLTISGLQAEDEADYYCSSYAGS
>V224RF-AHZZ01105198.1-iglv |(11242, 11543)|2.15042706119|(0.961,0.627,0.927)|-1
TLSVSVSPGQTARITCSGDVLKENYADWYQQKPGQAPVLVIYEDSKRPSGIPERFSGSTS
GDTTTLTISSTLSEDEADYYCFSGNENNPIVTQADGEV
>V225RF-AHZZ01105199.1-iglv |(5057, 5367)|2.99196000066|(0.998,0.995,0.999)|-1
SWAQAALTQPPSVSKSLGQSVTISCTGTSNDIGGYNAVSWYQQHPGTAPRLLIYEVSNRP
SGVSDRFSGSKSGNTASLTISGLQAEDEADYYCGSYRSGST
>V226RF-AHZZ01105199.1-iglv |(17460, 17763)|2.994900005|(1.000,0.995,1.000)|-1
SAASYELTQPHSVSVSPGQTARITCGGDNIGSKYVQWYQQKPAQAPVLVIYADSERPSGI
PERFSGSKSGNTATLTISGVEAGDEADYYCQVWDSSSDH
>V227RF-AHZZ01105200.1-iglv |(22027, 22330)|2.9505734465|(1.000,0.964,0.992)|-1
SAASYELTQPGSVSVSPRQTARITCGGDNIGSKSVHWYQQKPGQAPVLVIYNDSERPSGI
PERFSGSNSGNTATLTISGVEAGDEADYYCQVWDSSSKY
>V228RF-AHZZ01105200.1-igkv |(26500, 26797)|1.85474305734|(0.721,0.593,0.634)|-1
SVVSSELTQSCMSVPGTYSQDDCQGDSLKTYYASWYQQKQARSLCWSSMVTTTGPQGSPG
RFSVSWSGNTGSLTITAAQVEDEADYYCNSWDSSGNH
>V229RF-AHZZ01105201.1-iglv |(54273, 54578)|2.96964005313|(0.988,0.997,0.985)|-1
SVASYELTQPPSVSVSPGQTARITCSGDALPKNYAYWYQQKPGQAPVLVIYKDSERPSGI
PERFSSSSSGTTVTLTISGAQAEDEADYYCYSGDGNSLTV
>V230RF-AHZZ01105201.1-iglv |(63444, 63754)|2.9969280013|(0.997,1.000,1.000)|-1
SWAQSALTQPPSVSGSPGQSVTISCTGTSSDVGGYNYVSWYQQHPGTAPKLMIYDVSNRP
SGVSDRFSGSKSGNTASLTISGLQAEDEADYYCCSYTTSST
>V231RF-AHZZ01105201.1-iglv |(75648, 75951)|2.95598664203|(0.999,0.976,0.984)|-1
SAASYELTQPPSVSVSPGQTARITCGGDNIGSEAVHWYQQKPPQAPVLVIYADSERPSGI
PERFSGSNSGNTATLTISGVEAGDEADYYCQVWDISNDH
>V232RF-AHZZ01106331.1-igkv |(10056, 10356)|3.0|(1.000,1.000,1.000)|-1
ARCDIQLTQSPSSLSASVGDRVTITCRASQGISSYLAWYQQKPGKAPKLLIYDASNLQSG
VPSRFSGSGSGTEFTLTISSLQPEDFAVYYCQQRNSYP
>V233RF-AHZZ01106331.1-igkv |(16128, 16428)|3.0|(1.000,1.000,1.000)|-1
AKCDIQMTQSPSSLSASVGDRVTITCRASQGISSYLAWYQQKPGKAPKPLIYYASNLESG
VPSRFSGSGSGTEFTLTISSLQPEDFATYYCQQYNSAP
>V234RF-AHZZ01106331.1-igkv |(33100, 33400)|2.99074003277|(1.000,0.999,0.992)|-1
ARCDIQMTQSPSSLSASAGDRVTITCRASQGISTYLNWYQQKPGKAPTRLIYAASSLQSG
VPSRFSGSGSGTEFTLTISSLQPEDFATYYCLQYNSAP
>V235RF-AHZZ01106331.1-igkv |(43583, 43883)|3.0|(1.000,1.000,1.000)|-1
TTGETVMTQSPATLSLSPGERATLSCRASQSVGSSLAWYQQKPGQAPRLLVYYASSRATG
IPDRFSGSGSGTDFTLTISSLEPEDVGVYYCQKYNDWP
>V236RF-AHZZ01107345.1-trbv |(266, 563)|2.90189671725|(0.984,0.939,0.987)|-1
PIDSGITQTPKHLVIGMTNKKSLKCEQHMGHRAVYWYKQKAKKPPEIMFMYNYETLSINE
SVPSRFSPECSKSSLLHLHLQALQPEDSALYLCASSQ
>V237RF-AHZZ01107346.1-trbv |(98987, 99285)|2.60789057532|(0.962,0.890,0.837)|-1
TQTPSHQVTQMGQEVILRCVPIPNHLNFYWYRQILGQKVEFLVYFYNDNISEKSEIFDDR
FSVERPDGSNFTLKIKSTKLEDSAMYFCASSEATALQ
>V238RF-AHZZ01107346.1-trbv |(105930, 106243)|2.41536992486|(0.959,0.951,0.716)|-1
SLDTAVSQTPKYLVTQTGKKESLKCEQNLGHDAMYWYKQDSKKLLKIMFSYNNKELIINE
TVPNRISPDSPDKAHLNLHIKSVELGDSAVYFCASSQATALQ
>V239RF-AHZZ01107346.1-trbv |(110565, 110852)|1.65086013721|(0.554,0.901,0.581)|-1
SGVTQTPKHLVIGMTNKKSLKCEQHMGHRAVYWYKQKAKKPPEIMFMYNYETLSINESVP
SRFSPECSKSSLLHLHLQALQPETQPCISAPAAQ
>V240RF-AHZZ01107395.1-igkv |(1617, 1915)|2.93384072901|(0.996,0.958,0.986)|-1
TTGEIVMTQSPATLSLSPGERATLSCRASQSVNSYLAWYQQKPGQAPRLLIYDASSRATG
IPDRFSGSGSGTDFTLTISSLEPEDVAVYFCLQSSNW
>V241RF-AHZZ01107399.1-igkv |(425, 725)|2.99899600001|(1.000,0.999,1.000)|-1
AKCDIQMTQSPPSLSASVGDRVTITCQASQGISNWLAWYQQKPGEAPKLLIYAASTLQSG
VPSRFSGSGSGTEFTLTISSLQPEDFATYYCQQHNSYP
>V242RF-AHZZ01108758.1-ighv |(6447, 6754)|2.99593600205|(1.000,0.996,1.000)|-1
VLSQVQLQESGPGVVKPSETLSLTCAVYGGSVSGSYWSWIRQAPGKGLEWIGEINGNSGS
TSYNPSLKSRVTISTDTSKNQFSLKLSSVTAADTAVYYCA
>V243RF-AHZZ01110488.1-igkv |(1345, 1645)|2.99796800026|(0.998,1.000,1.000)|-1
ARCDIQMTQSPSSLSASVGDKVTITCHASQSISSWLAWYQQKPGKAPKLLIYKASSLQSG
VPSRFSGSGSGTDFTLTISSLQPEDFATYYCQQYDSNH
>V244RF-AHZZ01111138.1-igkv |(1438, 1738)|3.0|(1.000,1.000,1.000)|-1
ARCDIQMTQSPSSLSASVGDKVTITCHASQGISSWLSWYQQKPGKAPKLLIYKASSLQSG
VPSRFSGSGSGTDFTLTISSLQPEDFATYYCQQYSSSP
>V245RF-AHZZ01111138.1-igkv |(3529, 3815)|2.90617944683|(0.993,0.946,0.977)|-1
IVMTQSPATLSLSPGERATLSCRASQSVSSRLAWYQQKPGEAPRLLIYDASSRATGIPAR
FSGSGSGTDFTLTISSLEPEDVAVYFCQQESNW
>V246RF-AHZZ01111138.1-igkv |(14203, 14503)|2.99699200002|(0.999,1.000,0.998)|-1
ARCDIQMTQSPPSLSASVGDRVTITCQASQSISNYLAWYQQKPGKAPKLLIYAASTLQSG
VPSRFSGSGSGTEFTLTISSLQPEDFATYYCQRHNSYP
>V247RF-AHZZ01111367.1-igkv |(1438, 1738)|3.0|(1.000,1.000,1.000)|-1
ARCDIQMTQSPSSLSASVGDKVTITCHASQGISSWLSWYQQKPGKAPKLLIYKASSLQSG
VPSRFSGSGSGTDFTLTISSLQPEDFATYYCQQYSSSP
>V248RF-AHZZ01111367.1-igkv |(3529, 3815)|2.90617944683|(0.993,0.946,0.977)|-1
IVMTQSPATLSLSPGERATLSCRASQSVSSRLAWYQQKPGEAPRLLIYDASSRATGIPAR
FSGSGSGTDFTLTISSLEPEDVAVYFCQQESNW
>V249RF-AHZZ01111367.1-igkv |(14330, 14630)|2.99899600001|(1.000,1.000,0.999)|-1
ARCDIQMTQSPPSLSASVGDRVTITCQASQGISNYLAWYQQKPGKAPKLLIYAASTLQSG
VASRFSGSGSGTEFTLTISSLQPEDFATYYCQQHNSYP
>V250RF-AHZZ01112481.1-ighv |(613, 919)|3.0|(1.000,1.000,1.000)|-1
VLSQVQLQESGPGVVKPSETLSLTCAVSGGSISSSYWSWIRQPPGKGLEWIGYIYGGGST
NYNPSLKSRVTMSADTSKNQLSLKLSSVTAADTAVYYCAR
>V251RF-AHZZ01125719.1-ighv |(24239, 24554)|2.99899200002|(0.999,1.000,1.000)|-1
VQCEVQLVESGGGLVQPGGSLRVSCAASGFTFSNHYMQWVRQAPGKGLEWVGFIRNKANG
GTAEYAASVKGRFTISRDDSKSIASLQMNSLKTEDTAVYYCAR
>V252RF-AHZZ01125719.1-ighv |(41713, 42022)|3.0|(1.000,1.000,1.000)|-1
VQCEVQLAESGGGLVQPGGSLRLSCAASGFTFSSYEMHWVRQAPGKGLESVSVISGDSSY
THYADSVKGRFTISRDNAKNSLSLQMNSLRAEDTAVYYCAR
>V253RF-AHZZ01125719.1-ighv |(47992, 48299)|2.68888471933|(0.987,0.973,0.827)|-1
AHAQVQLVQSGPEVKQPGASVKVSCKASGYTFTSYGMNWVRQAHGQRLEWMGWINTDSGN
PTYAQGFKERFTFSMDTSISTAYLQISSLKAEDTAVYYCA
>V254RF-AHZZ01181503.1-ighv |(302, 609)|2.68888471933|(0.987,0.973,0.827)|-1
AHAQVQLVQSGPEVKQPGASVKVSCKASGYTFTSYGMNWVRQAHGQRLEWMGWINTDSGN
PTYAQGFKERFTFSMDTSISTAYLQISSLKAEDTAVYYCA
>V255RF-AHZZ01185532.1-igkv |(806, 1093)|2.98998000014|(0.997,0.998,0.995)|-1
TVVTQSPATLSLSPGERATISCRTSQSVGSRLAWYQQKPGQAPRLLIYGASNRATGIPDR
FSGSGSGTDFTLTISSLKPEDAAVYYCQQDNDWK
>V256RF-AHZZ01189918.1-igkv |(12178, 12478)|3.0|(1.000,1.000,1.000)|-1
ARCDIQMTQSPSSRSASVGDTVTITCQASQGISDYLAWYQQKPGKAPKLLIYAASNLESG
VPSRFSGSGSGTDFTLTISSLQPEDFATYYCQQYDSDP
>V257RF-AHZZ01189922.1-igkv |(4528, 4816)|2.99596000066|(1.000,0.997,0.999)|-1
IVMTQSPATLSLSLGETATISCRTSQSVGSKLAWYQQKPGQAPRLLIYGASSRATGIPDR
FSGSGSGTDFTLTISSLEPEDFAVYYCQETSNLS
>V258RF-AHZZ01189923.1-igkv |(14019, 14319)|2.97648007169|(0.993,0.984,1.000)|-1
ARCDIQMTLSPSSLSASVGDRVTITCRASQDISSYLNWYQQKPGKAPKLLIYYATSLESG
VPSRFSGSGSGTDFTLTISSLQPEDFATYYCQQFKSYP
>V259RF-AHZZ01198550.1-iglv |(8130, 8433)|3.0|(1.000,1.000,1.000)|-1
SWAQAALTQPHSVSGSPGQSVTISCTGTSSDIGGYDRVSWYQQHPGKAPKLMIYEVSKRP
SGVSDRFSGSKSGNTASLTISGLQAEDEADYYCSSYAGS
>V260RF-AHZZ01198550.1-iglv |(32463, 32773)|2.90142641716|(0.983,0.935,0.993)|-1
SWAQSALIQSPSVSGSLGQSVTISCTGTSSDIGRYNYVSWYRQQPGTTTKLMMYNVNTRP
SGVSDRFSGSKSGNTASLTISGLQAEDEADYYCSSYEASDT
>V261RF-AHZZ01198551.1-iglv |(10418, 10728)|2.99698000014|(0.998,1.000,0.999)|-1
SWAQSAPTQPPSVSGSPGQSVTISCTGTSSDIGYYNAVSWYQQHPGTAPKLMIYRVSNRP
SGVSDRFSGSKSGNTASLTISGLQAEDEADYYCSSYAGSDT
>V262RF-AHZZ01198551.1-iglv |(33935, 34238)|2.95821046559|(0.999,0.976,0.986)|-1
SAASYELTQPPSVSVSPGQMARITCSGDALPEKYADWYQQKPGQSPVLIIYEDSKWPSGI
PERFSGSSSGTVATLTISGAQVEDEADYYCYSTDSSGNH
>V263RF-AHZZ01198553.1-iglv |(13429, 13732)|2.44160696449|(0.993,0.968,0.728)|-1
SVVSSELTQDPAVSVALGQTVRITCQGDSLSSYYASWYQQKPGQAPVLVIYGNNNRPSGI
PERFSVSWSGNTGSLTITGAQVEDEADYYCGSWDSSGNH
>V264RF-AHZZ01198553.1-igkv |(31919, 32229)|2.34399473077|(0.839,0.693,0.919)|-1
SWAQAALTQPPSVSKSLGQSVTISCAGTSSGIASYSDVSWYQQHPGTAPRLLIYSVSNRP
SGVSDRFSGFKSGSTASLTISGLQAEDEAIYYCCSYRSGST
>V265RF-AHZZ01198553.1-iglv |(39757, 40060)|2.98488400513|(0.996,0.991,0.998)|-1
SEASYELIQPPSVSVSPGQTARITCSGDALPDYYAYWYQQKSGQAPMLVIYKDSERPSGI
PERFSGSSSGTTVTLTISGVQAEDEADYYCQSADSSGNH
>V266RF-AHZZ01198553.1-iglv |(56860, 57163)|2.99598400013|(0.998,0.998,1.000)|-1
SATSYELTQPPSVSAASGQTARITCGGDSIGSKNVQWYQQKPAQAPVLVIYADSKRPSGI
PERFSGSNSGNTATLTISGVEAGDEADYYCQVWDSSSKH
>V267RF-AHZZ01198553.1-iglv |(68992, 69302)|2.99093200206|(0.998,0.999,0.994)|-1
SWAQAALTQPPSVSGSPGQSVTISCTGTSSDIGGYNYVSWYQQHPGKAPKLMIYEVSKRP
SGVSDRFSGSKSGNTASLTISGLQAEDEADYYCGSYASSST
>V0RF-JABR01013263.1-trbv |(179, 479)|2.95616889635|(0.996,0.983,0.979)|1
HMGAGVSQSPRYKVTKKGQDVVLSCDPISGHEALYWYQQALGQGPKFLTYFNYEAQPDKS
GLPNDRFSAERPKGSVSTLTIQRTEQRDSAVYLCASSL
>V1RF-JABR01016432.1-igkv |(2852, 3152)|1.61659576952|(0.507,0.736,0.590)|1
HEALLSPSLSRPRTTMSVSLLLPGSWAQCVLTQPPSVSAAPGQRVTISCSGSSFNFRRYY
VSWYQQLPGAAPKLLIYDVNKRTSGVPERFSGSQSGTS
>V2RF-JABR01016432.1-iglv |(14602, 14903)|1.56692244732|(0.519,0.871,0.585)|1
SLSQPVLTQPPSASASLGASVTLTCTLSSGYSNYAVDWHQQRPGKGPQFVMRVGTGGIVG
SKGDGIPDRFSGSGSGLNRYLTIKNIQEEDESDYHCGA
>V3RF-JABR01016432.1-iglv |(27490, 27800)|2.68040268833|(0.968,0.968,0.824)|1
SLSQPVLTQPTSLSASPGASARLTCTLSSGINVGSYRIFWYQQKPGSPPRYLLWYKSDSD
KHQGSGVPSRFSGSKDASANAGILRISGLHSEDEADYYCTI
>V4RF-JABR01016432.1-iglv |(31781, 32090)|2.98974003277|(0.999,0.991,1.000)|1
SWAQSVLTQPPSASGPPGQSVTISCSGSSSNIGSNYVYWYQQLSGKAPKLLIYDNNKRPS
GVPDRFSGSKSGTSASLAISGLQTEDEADYYCAAWDDSLSG
>V5RF-JABR01020048.1-igkv |(1483, 1801)|2.54836887715|(0.996,0.795,0.926)|1
AYGDIVMTQSPDSLAVSLGERVTINCKSSQSLLYSSNNKNYLAWYQQKPGQAPKLLIYWA
STRESGVPNRFSGSGSGTDFTLTISGLQAEDMAVYYCQQYYSTP
>V6RF-JABR01043229.1-iglv |(142541, 142835)|2.97080401921|(0.988,0.988,0.995)|1
VVTQEPLLSVSSGGTVAITCGLSSGPVSTSNYPSWYQQTPGQAPRTLIYSTNTRPSGVPD
RFSGSILGNKAALTITGAEADDESDYYCVLYMGSGI
>V7RF-JABR01052882.1-trgv |(79087, 79393)|2.13305247196|(0.865,0.724,0.711)|1
RTKSVTRPAGSSAEITCDFSGDSNLYIHWYLHQEGKAPQRLLYYEPYYFKVVLESGISPG
KYDTASTRKSWNLRLQNLIENDSGVYYCATWDRHHDSDLP
>V8RF-JABR01052882.1-trgv |(83822, 84131)|2.48616065559|(0.850,0.772,0.897)|1
RTKSVTRPAGSSAEITCDLPEFSSFYIHWYLHQEGKAPQRLLYCDSSNSRVVLESGISPG
KYDTYVSTRRNLRLRLRNLIENDSGVYYCANWDRHSDSDLL
>V9RF-JABR01052882.1-trgv |(88181, 88494)|2.96290837717|(1.000,0.999,0.968)|1
SQKSSNLEGRTKSVTRPTGSSAEITCDFSGDSNFYIHWYLHQEGKAPQRLLYYDVSNSRD
VLESGLSLGKYYTHTRTRWSWILILRNLIENDSGVYYCATWD
>V10RF-JABR01059011.1-ighv |(294, 609)|3.0|(1.000,1.000,1.000)|1
VQCEVQLVESGGGLVQPGGSLRLSCAASGFTFSNYHMSWVRQAPGKGLEWVGFIRNKASG
GTAEYAASVKGRFTISRDDSKSITYLQMNSLKTEDTAVYYCAR
>V11RF-JABR01059011.1-ighv |(15565, 15872)|2.96084466791|(0.993,0.993,0.976)|1
VQCEVQSVESGGGLVQPGGSLRLSCAASGFTFSSYWMSWVRQAPGKGPEWVSDISGSTIY
YADSVKGRFTVSRDDAKNSLSLQMDSLRAEDTAVYYCARE
>V12RF-JABR01059012.1-ighv |(2630, 2952)|1.59868820017|(0.924,0.650,0.610)|1
VFSQVTLKESGPALVKPTQTLTLTCTFSGFSLSTSGMRVSWIRQPPGKALEWLALIYWDD
DKRYSPSLKSRLTISKDTSKNQVVLTMTNMDPVDTATYYCAQGAQ
>V13RF-JABR01059012.1-ighv |(17062, 17386)|2.65895295177|(0.979,0.930,0.837)|1
AHSQVQLVQSGAEVKQPGASVKVSCKASGYTFTSYAMNWVRQAHGQRLEWIGWINTNTGN
PTYAQGFKERFAFSMDTSISTAYLQISSLKAEDTAVYYCARDTVWK
>V14RF-JABR01062345.1-ighv |(2435, 2744)|2.77681757854|(0.954,0.937,0.899)|1
AQSQEQLVQSGAEVKKPGASVKVSCKASGFTFSSDAISWVRQAPGQGLEWMGRIIPILSR
TNYAQKFQGRVTITADTSTSTAYMELSSLRSEDTAVYYCAR
>V15RF-JABR01066987.1-ighv |(11840, 12146)|3.0|(1.000,1.000,1.000)|1
VQCEVQLTESGGGLVQPDGSLRLSCAASGFTFSSYAMQWVHQAPGKGLEWVSAIGPGGDT
YYADAVKGRFTISRDNTKNSLYLQMNSLRAEDTAVYYCAR
>V16RF-JABR01066987.1-ighv |(19343, 19652)|2.7438034122|(0.931,0.947,0.878)|1
AHSQEQLVQSGAEVKKPGASVKVSCKASGFTFDSSAISWVRQAPGQGLEWMGVIIPVAGI
TNYAQKFQGRVTITADTSTSTAYMELSSLRSEDTAMYYCAA
>V17RF-JABR01070187.1-ighv |(4809, 5118)|2.02390159402|(0.891,0.559,0.940)|1
AHSQVQLVQSGAEVKKPGSSVKVSCKASGYTFTDYYMHWVRQAPGQGLERMGWINTGSGS
TGYAQKFQGRVTMTRDTSTSTAYMELSSLRSEDTAVYYCTT
>V18RF-JABR01070187.1-ighv |(7644, 7959)|2.95175367204|(0.988,0.999,0.967)|1
VQCEVQLVESGGGLVQPGGSLRLSCAASGFTFSDYYMQWVRQAPGKGLQWVGLIRNKANG
GTTDYSVSVKGRCTISRDDSKSITSLQMNSLKTEDTAVYYCAR
>V19RF-JABR01070187.1-ighv |(14433, 14739)|2.99698000014|(1.000,0.999,0.998)|1
VQCEMQLVESGGGLVQPGGSLRLSCAASGFTFSSYDMHWVRQAPGKGLEWVSAISIGGGT
YYPDSVKGRFTISRDNAKNSLYLQMNSLRAEDMAVYYCAR
>V20RF-JABR01071886.1-ighv |(1825, 2139)|2.31128119253|(0.839,0.682,0.898)|1
VWSQVTLKESGPALVKPSQTLTLTCTFSGFSISTSGTGVGWIRQPSGKALEWLASIYWND
SKYYSTSLKSRLTISKDTSKNQVVLTMTNMDPVDTATYYCAHI
>V21RF-JABR01074704.1-ighv |(2136, 2448)|2.99385601037|(1.000,1.000,0.994)|1
VLSQVQLQESGPGLVKPSETLSLTCAVSGGSISSYNYWSWIRQPPGKGLEWIGHIYGNSA
STNYNPSLKSRVTISKDTSKNQFSLKLSSVTAADTAVYYCAR
>V22RF-JABR01074958.1-ighv |(126, 441)|2.36615517721|(0.950,0.684,0.983)|1
VQCEVQLVESGGGLVQPGGPLRLSCAASGFTFSDYYMPWVRQAPGKGLEWVGHIKNKANS
YTTEYAASVKGRFTISRDDSKNTLYLQMNSLKTEDTAVYYCAT
>V23RF-JABR01076259.1-igkv |(8845, 9160)|2.97997652411|(0.999,0.983,0.999)|1
SSGDIVMTQTPLSLPITVGETASISCRSSQSLLSSNGYNYLSWYLQKPGQSLQLLIYYGS
NRASGVPDRFSGSGSGTDFTLKISRVEAEDIGVYYCMQTLQTP
>V24RF-JABR01076260.1-igkv |(856, 1158)|2.60447591431|(0.925,0.894,0.827)|1
STGDVVMTQSPLSLPVTPGEPASISCRSSQSLLHSSGNTYLSWFQQKPGQSPRRLIYKVS
NRDSGVPDRFTGSGAGTDFTLKISRVEAEDVGVYYCMEG
>V25RF-JABR01076260.1-igkv |(17028, 17326)|2.81146636542|(1.000,0.874,0.999)|1
SKGEIVLTQSPAFRSVTPKEKVTITCRASQSIGSSLHWYQQKPDQSPKLLIKYASQSISG
VPSRFSGSGSGTDFTLTINSLEAEDAATYYCQQSSSF
>V26RF-JABR01076261.1-igkv |(12124, 12424)|2.22464681149|(0.992,0.634,1.000)|1
TTGEIVLTQSPAILSLSPGERATFSCRASQSIGSNLAWYQQKPGQAPRLLIYGASSRATG
IPDRFSGSGSGTEFTLTISSLEPEDFAVYYCQKYSSSP
>V27RF-JABR01076261.1-igkv |(17937, 18237)|2.4214833174|(0.960,0.859,0.773)|1
VRCDIQMTQSPSFLSASVEDTVTITCQVSQSISNDLAWYQQKPGKSPTLLIYDATNLHPG
FPSRFSGSGSGADYSLTISSLELEDFAAYYCQQEYSYP
>V28RF-JABR01076261.1-igkv |(78882, 79179)|2.9696826523|(0.998,0.974,1.000)|1
RCDIQMTQSPSSLSASVGDRVTITCRASQSFSSSLAWYQQKLGKAPKLLIYGASSLQSGI
PSRFSGSKSGTDFTLTISSLQPEDVAAYYCQQYYSYP
>V29RF-JABR01076261.1-igkv |(91397, 91697)|2.63600279109|(0.996,0.801,0.981)|1
ARCDIQMIQSPSSLPASVGDRVTITCRASQGISSYLNWYQQKPGKAPKLLIYYATTLQSG
VPSRFSGSGSGTEFTLTISSLQPEDFAVCYCQQHNSYP
>V30RF-JABR01076261.1-igkv |(111081, 111379)|3.0|(1.000,1.000,1.000)|1
ARCDIQMTQSPSSLSASVGDRVTITCRASQGISSYLNWYQQKPGKAPKLLIYAASSLASG
VPSRFSGSGSGTEFTLTISSLQPEDFAAYYCQQYNSA
>V31RF-JABR01076261.1-igkv |(121606, 121906)|2.35934331846|(0.976,0.684,0.989)|1
TTGEIVMTQSPATLSLSPGERATLSCRASQSAGSNLAWYQQKPRQAPRLLIYGASSRATG
IPARFSGSGSGTDFTLTISSLEPEDVGIYYCQQYNDWP
>V32RF-JABR01076261.1-igkv |(164504, 164804)|3.0|(1.000,1.000,1.000)|1
ARCDIQMSQSPSSLSASVGDRVTITCQASQGISNALAWYQQKPGKAPKLLIYDASSLDSG
VPSRFSGSGSGTEFTLTISSLQPEDFATYYCQQYNSDP
>V33RF-JABR01076263.1-igkv |(15350, 15650)|2.99593600205|(1.000,1.000,0.996)|1
ARCDIQMTQSPSSLSASVGDRVTITCQASQGISSYLSWYQQKPGKAPKLLIYKASSLASG
VPSRFSGSGSGTEFTLTISSLQPEDFAAYYCQQHNSLP
>V34RF-JABR01076263.1-igkv |(29170, 29470)|2.32578349447|(0.997,0.801,0.806)|1
ARCDIQMIQSPSSLPASVGDRVTITCRASQGISSYLNWYQQKPGKAPKLLIYYATTLQSG
VPSRFSGSGSGTEFTLTISSLQPEDFAAYYCLQHNSDP
>V35RF-JABR01076263.1-igkv |(35502, 35802)|3.0|(1.000,1.000,1.000)|1
ARCDIQMTQSPSSLSASVGDRVTITCQASQGISSWLAWYQQKPGKAPKLLIYKASSLQSG
VPSRFSGSGSGTEFTLTISSLQPEDFATYYCQQHNSNP
>V36RF-JABR01076263.1-igkv |(51711, 52011)|2.97484034555|(1.000,0.987,0.989)|1
TTGEIVMTQSPATLSLSPGERATLSCRASQSVSSRLVWYQQKHGQAPTLLIYGASSRATG
IPARFSGSGSGTDFTLTISSLEPEDVGVYYCQQDYSWP
>V37RF-JABR01076263.1-igkv |(105623, 105923)|3.0|(1.000,1.000,1.000)|1
ARCDIQMTQSPSSLSASVGDTVTITCQASQGISSYLAWYQQKPGKAPKLLIYAASTLQSG
VPSRFSGSGSGTDFTLTISSLQPEDFATYYCQQYNSNP
>V38RF-JABR01076263.1-igkv |(125399, 125698)|2.98183600705|(0.991,0.995,0.996)|1
TTGEIVMTQSPATLSLSPGERATLSCRASQSVGSYLAWYQQKPGQAPRLLIYGASSRATG
IPDRFSGSGSGTEFTLTISSLEPEDFAVYFCQHYNNWN
>V39RF-JABR01076264.1-igkv |(9604, 9904)|2.56879145254|(0.986,0.993,0.766)|1
ARCDIQMTQSPSSLSASIGDTVTITCHASQSISSWLAWYQQKPGKAPKLLIYKASSLQSG
VPSRFSGRGSGTDFTLTISSLQPEDFATYYCQKCNSNP
>V40RF-JABR01076265.1-igkv |(8185, 8485)|2.9700882474|(1.000,1.000,0.973)|1
TTGEIVMTQSPATLSLSPGERATLSCRASQSVSSYLAWYQQKPGQAPRLLIYGASSRATG
IPARFSGSGSGTDFTLTISSLEPEDVAVYYCQQGSNLP
>V41RF-JABR01076266.1-igkv |(4594, 4894)|3.0|(1.000,1.000,1.000)|1
ARCDIQMTQSPSSLSASVGDRVTITCQASQGISNYLAWYQQKPGKAPKLLIYKASTLQSG
VPSRFSGSGSGTDFTLTISSLQPEDFATYYCQQGNSYP
>V42RF-JABR01076266.1-igkv |(22548, 22848)|2.99899600001|(1.000,1.000,0.999)|1
ARCDIQMTQSPSSLSASVGDRVTITCQASQGISSYLAWYQQKPGKAPKLLIYDASTLQSG
VPSRFSGSGSGTDFTLTISSLQPEDFAAYYCQQGNSNP
>V43RF-JABR01080842.1-trav |(1737, 2024)|2.34577730718|(0.934,0.684,0.950)|1
LSGEDQVTQSPEALRLREGESSSLNCSYTVSSLRGLLWYRQDPGKGPEFLFILYSAGEEK
EKERLKATLTKKESFLHITGPKPEDSATYLCAVQ
>V44RF-JABR01088351.1-igkv |(10561, 10879)|2.98548011776|(1.000,0.989,0.997)|1
TSGDIVMTQTPLSLPVTPGEPASISCRSSQSLLDSDDGYTYLDWYLQKPGQSPQLLIYEV
SNRASGVSDRFSGSGSGTDFTLKISRVEAEDVGVYYCMQSIEYP
>V45RF-JABR01088351.1-igkv |(62711, 63011)|3.0|(1.000,1.000,1.000)|1
ARCDIQMTQSPSSLSASVGDRVTITCRASQSINKELSWYQQKPGKAPTLLIYAASSLQTG
VSSRFSGSGSGTDFTLTISSLQPEDVATYYCLQDYTTP
>V46RF-JABR01088351.1-igkv |(74390, 74708)|2.34368902196|(0.868,0.688,0.920)|1
SSGEIVMTRTPLSLPITPGEPASISCRSSQSLMDGDDGFTYLYWYLQKPGQSPQLLMHFA
SYRASGVPDRFSGSGSGTDFTLEISKVEAEDIGVYYCMQALELP
>V47RF-JABR01088351.1-igkv |(103867, 104182)|2.59407495899|(0.998,0.776,0.999)|1
SSGDIVMTQTPLSLPVIPGEPASISCRSSQSLLHSNGYTYLDWYLQKPGQSPQLLIYLGS
NRASGVPDRFSGSGSGTDFTLKISRVEAEDVGVYYCMQALEFP
>V48RF-JABR01088351.1-igkv |(113703, 114003)|2.98464005313|(0.999,0.990,0.996)|1
ARCDIQMTQSPSSLSASVGDRVTITCRASQGISNDLAWYQQKLGETPKLLIYDASSLQSG
IPSRFSGSGSGADFTLTISSLQPEDFATYYCQHYYSAP
>V49RF-JABR01088351.1-igkv |(136166, 136466)|2.99799200002|(1.000,0.999,0.999)|1
ARCDIQMTQSPSSLSASVGDRVTISCQASQNIYSNLGWYQQKPGKAPKLLIYAASTLQSG
VPSRFSGSGSGTDFTLTISSLQPEDVATYYCQHGYSTP
>V50RF-JABR01088351.1-igkv |(159354, 159654)|2.9969280013|(0.997,1.000,1.000)|1
ARCDIQMTQSPSSLSASVGDRITITCQASQGISNDLAWYQQKPGESPKLLIYEASSLQSG
IPSRFSGSGSGTDFTLTISSLQPEDFATYYCQHYYSTP
>V51RF-JABR01088351.1-igkv |(170244, 170542)|2.98253608204|(0.999,0.989,0.995)|1
ARCDIQMTQSPSSLSASVGDRVTISCQASESISDYLNWYQQKPGKAPKLLIYAASTLQSV
VPSRFSGSGSGTDFTLTISSLQPEDFATYYCQHGYGT
>V52RF-JABR01089346.1-ighv |(860, 1169)|2.98974003277|(0.999,1.000,0.991)|1
AQSQVQLVQSGAEVKKPGASVKVSCKASGYNFRSYAISWVRQAPGQGLEWMGVIIPIRSR
TSYAQKFQGRVTITADTSTSTAYMELSSLRSEDMAVYYCAR
>V53RF-JABR01090264.1-ighv |(61, 375)|2.04183952478|(0.833,0.569,0.902)|1
VWSQVTLKESGPALVKPTQTLTLTCTFSGFSISTSGTGMGWIRQPSGKALEWLASIYWNY
SKYYSTSLKSRLTISKDTSKNQVVLTMTNMDPVDTATYYCAHI
>V54RF-JABR01091180.1-ighv |(15340, 15652)|2.67876244809|(0.993,0.811,0.999)|1
VLSQVQLQESGPAVVKPSETLSLTCAVSGGSISSYYYWSWIRQPPGKGLEWIGYIYGSGG
STYYNPSLKSRVTISTDTSKNQFSLKLSSVTAADTAVYYCAR
>V55RF-JABR01091180.1-ighv |(60296, 60605)|2.99599200002|(0.998,0.999,0.999)|1
VQCEVQLVESGGGLVQPGGSLRLSCAASGFTFSSYWMSWVRQAPEKGLEWVSYINSDGSS
TSYADSMKGRFTISRDNAKNSLYLQMNSLRAEDRAVYYCVR
>V56RF-JABR01091180.1-ighv |(68033, 68348)|2.99596800026|(1.000,0.998,0.998)|1
VQCEVQLVESGGGLVQPGGSLRISCAASGFTFSSSAMHWVRQASGKGLEWVGRIRSKSKN
YATDYAASVKGRFTISRDDSKNTAYLQMNSLKTEDTAVYYCTT
>V57RF-JABR01091180.1-ighv |(78923, 79238)|2.99899600001|(1.000,0.999,1.000)|1
VQCEVQLVESGGGLVQPEGSLRLSCAASGFTFSSYYMHWVRQAPGKGLEWVGLIKNKANS
YTTEYAASVKGRFTISRDDSKNTLYLQMSSLKTEDTAVYYCAR
>V58RF-JABR01092448.1-trbv |(783, 1083)|2.40512696394|(0.896,0.749,0.851)|1
HTDAGVIQSPRHEVTEMGKEVTLRCEPISGHSSLFWYRQTMMRGLEFLIYFNNKSPIDDS
GMPKDRFSAKMPDASFSTLRIQPSEPRDSAVYFCASSL
>V59RF-JABR01092448.1-trbv |(15339, 15639)|2.24968130732|(0.783,0.898,0.670)|1
LIDAGVTQTPRHKVTEIGQEVTMRCQPILGHNTVFWYRQTMMQGLELLVYLRNKASLDDS
GMPKDRFSAEMPDASLATLKIQPSEPRDSAVYLCASGL
>V60RF-JABR01092448.1-trbv |(22332, 22623)|1.77849626392|(0.973,0.749,0.624)|1
PGVTQFPSHRVIEKGQTVTLRCDPISGHDYLYWYRRVIGKEIKFLIYFMRASMQDESGMP
KKRFSAERTGGTYSTLKLQPAELEDSGVYFCASSQ
>V61RF-JABR01092448.1-trbv |(27430, 27727)|1.90171773194|(0.919,0.737,0.639)|1
HGDVMVIQNPRYQVTQSGKPVTLSCSQNLNHKVMYWYQQKPSQAPKLLFHYYDKDFNNEA
DTPDNFQSRRPNTSFCFLDIRSPGLEDAAVYLCASSK
>V62RF-JABR01092448.1-trbv |(32724, 33024)|2.52517321848|(0.921,0.884,0.791)|1
SPGEEVTQTPKHLVKGEGQKAKLYCAPITGHSYVFWYQQVLKKEFKFLISFQNEDVVDET
QMPKERFSAKCPRNSPCSLEIQATKLKDSATYFCASSQ
>V63RF-JABR01092448.1-trbv |(49780, 50073)|2.26189115853|(0.872,0.770,0.734)|1
LSNAGITQNPRHLVRRRGQEARLRCSPMKGHSHVYWYQQLPEEGLKFMVYLQKEKIIDES
GMPKERFSAEFPKEGPSILRIQQAEQEDSAAYFCAS
>V64RF-JABR01092448.1-trbv |(70823, 71123)|2.32074559064|(0.955,0.686,0.933)|1
STDTKVTQRPRLLVKANEQKAKMECVPIKGHSYVYWYRKKLDEELKFLVYFQNEVIIQKA
EIINERFSAQCPQNSSCTLEIQSTESGDAALYFCASSK
>V65RF-JABR01092448.1-trbv |(79737, 80037)|2.97864005313|(0.997,0.988,0.994)|1
SFHAKVTQTPGYLVKGKGQKTKMDCTPEKGHTFVYWYQQNQNKEFTFLISFQSEQVLQET
ELHKKRFSSQCPKNPPCSLEILSSEPGDTALYLCASSQ
>V66RF-JABR01092448.1-trbv |(88946, 89244)|2.9498222392|(0.993,0.989,0.970)|1
SMDADVTQTPRNMIAKTGKRIMLECSQTKGHDQMYWYRQDPGLGLRLIYYSFDVKDINKG
EISDGYSVSRQEQAQFSLSLESATPNQTALYFCATSD
>V67RF-JABR01092448.1-trbv |(97426, 97723)|2.99696400065|(1.000,1.000,0.997)|1
LMEADIYQNPRHRVIGTGKKITLECSQTMGHDKMYWYQQDPGMELHLIHYSYGVNSTERG
DFSSESTVSRIRIEHFPLTLESASPSHTSQYLCASSE
>V68RF-JABR01092448.1-trbv |(131672, 131969)|2.40263203815|(0.876,0.920,0.714)|1
PLEAQVTQNPRHLITVTGKKLTVTCSQNMNHEYMSWYRQDPGLGLRQIYYSINVEVIDKG
DIPEGYNVSRKEKTNFPLILESPSPSQTSLYLCASSL
>V69RF-JABR01092448.1-trbv |(137251, 137558)|2.94382941374|(0.995,0.959,0.995)|1
LVDVKVTQSSRHLIKRMGEKVFLECVQDMDHERMFWYRQDPGLGLQLIYFSYDVKVNEKG
DIPEGYSVSREKKERFSLILGSASTNQTSMYLCASSLSTA
>V70RF-JABR01094257.1-igkv |(894, 1187)|2.55667446473|(0.923,0.838,0.847)|1
LASISCRSSQSLLHSDGKTYLNWYLQKPGQSPQLPIYTVSNQASGVQERFSGSGSGTDFT
LKISRVEAEDVGVYYCMQDTQIPPIVIQPLLEWLSC
>V71RF-JABR01095741.1-trbv |(145128, 145441)|2.20799031263|(0.954,0.984,0.625)|1
SLDTAVSQTPKYLVTQMGKKESLKCEQNLGHDTMYWYKQDSKKLLQIMFSYNNKELIINE
TVPNRISPDSPDKAHLILHIKSLELGDSAVYFCASSQGTALQ
>V72RF-JABR01095741.1-trbv |(149740, 150037)|2.94642008525|(0.988,0.979,0.980)|1
PTDAGVTQTPKHLVMGMTNKKSLKCEQHMGHRAMYWYKQKAKKPPEIMFMYNYEQLSINE
SVPSRFSPECSKSSLLNLHLQALQPEDSALYLCASSQ
>V73RF-JABR01095742.1-trbv |(5770, 6070)|2.91921046559|(0.986,0.973,0.963)|1
HTEPEVTQTPSHRVTQMGQEVILRCVPISNHLYFYWYRQILGQKVEFLVYFYNDEISEKS
EIFDDRFSVGRPDGSNFTLKIKSTKLEDSAMYFCASSE
>V74RF-JABR01095742.1-trbv |(13381, 13677)|2.03050765604|(0.890,0.977,0.555)|1
SLDTAVSQTPKYLVTQMGKKESLKCEQNLGHDAMYWYKQDSKKLLKIMFSYNNKELILNE
TVPNRISPDSPDKAHLILHIKSLELGDSAVYFCASTK
>V75RF-JABR01095742.1-trbv |(21882, 22173)|1.66315099172|(0.857,0.730,0.514)|1
PEVTQTPSHQVTRMGQEVILWCVPISNHFYFYWYRQILGQKVEFLVSFVNDNISEKSKIF
DDRFSVERPDGSNFTLKIKSTKLEDSAMYFCASSE
>V76RF-JABR01095742.1-trbv |(32732, 33020)|2.72010536978|(0.935,0.929,0.872)|1
TGVTQTPKHLVMGMTNKKSLKCEQHLRHNAMYWYKQKAKKPPELMFSFNYEKLSLNESVP
SRFSPECSKSSLLYLHVHALQPEDSALYLCASSQ
>V77RF-JABR01189674.1-iglv |(736, 1045)|2.99594800078|(0.997,0.999,1.000)|1
SWAQSVLTQPPSASGAPGQSVTISCSGSSSNIRGNGVHWYQQLSGTAPKILIYNNNQRPS
GVPDRFSGSKSGTSASLAITGLRSEDEADYYCEAWDDSLSA
>V78RF-JABR01196792.1-trbv |(5405, 5708)|2.96993200206|(0.989,0.993,0.988)|1
SVFSALVSQKPSRDVCQRGTSVTIQCQVDSQVTMMFWYRQQPGQSLTLIATANQGSEATY
EGGFVIDKFPISRPNLTFSTLTVSNTSPEDSSIYLCSVE
>V79RF-JABR01004697.1-ighv |(11840, 12149)|2.99899600001|(1.000,0.999,1.000)|-1
VQGEVQLVESGGGLVQPGGSLRLSCAASGFTFGDYAMSWVRQAPGKGLEWVSYISSASST
IYYADSVKGRFTISRDNAKNTLSLQMNNLRAEDTAVYYCAK
>V80RF-JABR01004697.1-ighv |(62563, 62872)|2.18882596413|(0.705,0.738,0.764)|-1
AQSQVQLVQSGAEVRKPGDSVKVSCKASGYTFTNHNVDWVRQAPGQGLVWMGGINTNTGG
TSCAQTFQGRVTMTRDTSTSTAFMELSCLRSEDTAVYYCAR
>V81RF-JABR01004697.1-ighv |(71645, 71954)|2.76763093133|(0.945,0.989,0.866)|-1
AHSQVQLVQSGAEIKQPGASVKVSCKASGYTFTSYYMHWVRQAPGQGLEWIGLISPYNGN
TGYAQNFQGRVTMTTDTSTSTGYMEMSSLRSEDTAVYYCTR
>V82RF-JABR01004698.1-ighv |(7380, 7689)|2.79020103418|(0.914,0.908,0.993)|-1
VQCELQLVESGGDLVQPGGYMRLSCAASGFTFSNYCISWVCQAPEKGLEWVSRINRDGSS
TYYADSMKGQVTISRENAKNTLYLQMNNLRAEDKAVYYCTR
>V83RF-JABR01004698.1-ighv |(16088, 16403)|3.0|(1.000,1.000,1.000)|-1
VQCEVQLVESGGGLVQPGGSLRLSCAASGFTFSSSAMHWVRQASGKGLEWVGRIRSKSNN
YATDYAASVKGRFTISRDDSKNTLYLQMNSLKTEDTAVYYCTT
>V84RF-JABR01011024.1-ighv |(77, 386)|2.99296000066|(0.997,0.996,1.000)|-1
VQCEVQLVESGGGLAKPAGSLRLSCAASGFTFSSYGMHWVRQAPGKGLEWVSYINSGGGS
TRYADSVKGRFTISRDNAKNTLYLQMDSLRAEDTAVYYCAR
>V85RF-JABR01032523.1-igkv |(5692, 6004)|2.35158949792|(0.828,0.756,0.793)|-1
CNGDIVLTQSPASLAVSPGQRATITCRASESVNFFGINLIHWYQQKPGQPPKLLIYQVSN
KDTGVPARFSGIGSGTDFTLTINPVEADDAANYYCLQSKNFP
>V86RF-JABR01035059.1-ighv |(16381, 16696)|3.0|(1.000,1.000,1.000)|-1
VQCEVQLVESGGGLVQPGGSLRLSCAASGFTFSNYWMGWVRQAPGKGLEWVGRIKKTTDG
GTAEYAASVKGRFTISRDDSKNTLYLQMNSLKTEDTAVYYCAR
>V87RF-JABR01035059.1-ighv |(36195, 36504)|2.95989637729|(0.998,0.966,1.000)|-1
VQGEVQLVESGGGLAKPAGSLRLSCAASGFTFSSYWMNWVRQAPGKGLEWVSAINSGGGS
TYYADSVKGRFTISRDNSKNMLYLQMNNLRAEDTAVYYCAR
>V88RF-JABR01035060.1-ighv |(7723, 8038)|3.0|(1.000,1.000,1.000)|-1
VKCEAQLMESGGGLVQPGGSLRLSCAASGFTFSDHYMQWVRQAPGKGLEWVGLIRNKADG
ETTDYAASVKGRVTISRDDSKSITYLQMSSLKTEDTAVYYCAR
>V89RF-JABR01035060.1-ighv |(11223, 11532)|2.99385601037|(1.000,0.994,1.000)|-1
VLSQVQLQESGPGLVKPSETLSLTCAVSGGSLSGYYWGWIRQPPGKGLEWIGYISGSSGS
TNYNPSLKSRVTISTDTSKNQFSLKLSSVTAADTAVYYCAR
>V90RF-JABR01035060.1-ighv |(22673, 22982)|2.69019077212|(1.000,0.820,0.992)|-1
VQGEVQLVESGGGLVQPEGSLRLSCAASGFTFSSYGMSWVRQAPGKGLEWVAVIWYDGSQ
KYYADSVKGRFTISRDNAKNTLYLQMDSLRAEDTAVYYCAK
>V91RF-JABR01035060.1-ighv |(72220, 72526)|2.40969510859|(0.989,0.997,0.703)|-1
CAEVQLVQSGAEVKRPGESLKISCKTSGYSFTSYWISWVRQMPGKGLEWMGMIYPGDSDT
RYSPSFQGQVTISADKSISTTYLQWSSLKASDTATYYCAK
>V92RF-JABR01039933.1-trbv |(3008, 3306)|1.60076213034|(0.511,0.547,0.556)|-1
MSAIELVPEHQTVTVSVGNPATLRCSMKGEAISNYYINWYRKTQDNTMTFIYREKGIYGP
GFKDNFQGDIDTEENQAVLKILAPSERDEGSYYCASD
>V93RF-JABR01039937.1-trav |(16162, 16450)|2.97593200206|(0.993,0.994,0.989)|-1
LSGELKVGQNPLFLSTQEGRNYTVYCNYSTASDRLYWYRQNPGKSLESLFVLLSNGAVKQ
EGRLMASLDTKARLSTLYITAALQDLSATYFCAV
>V94RF-JABR01041956.1-igkv |(1660, 1960)|2.75434302471|(0.889,0.925,0.974)|-1
TAGQVILTQSPATLSLSTGEIATLSCRASQSVNRYLAWYQQKPGQAPRLLIYGASSRATG
IPDRFSGSGSGTEFTLTISSLEPEDVGVYHCYQYNSRY
>V95RF-JABR01049702.1-ighv |(5414, 5728)|2.994900005|(1.000,1.000,0.995)|-1
VQCEVQLVESGGGLVQPGGSLRLSCAASGFTFSDHYLSWVRQAPGKGLEWVSFMRNNANG
GRTEYAASVKGRCTISRDDSKSITSLQMSSLKTEDTAVYYCAR
>V96RF-JABR01055994.1-ighv |(3382, 3691)|2.98886400565|(0.997,1.000,0.992)|-1
AQSQVQLVQSGAEVKKPGASVKLSCKASGYTFTSYNINWVRQAPGQGLEWMGWINPSSGS
TGYAQNFQGRVTMTRDTSTSTAYMELSSLRSEDTAVYYCAR
>V97RF-JABR01061517.1-igkv |(4119, 4433)|2.10016113455|(0.959,0.721,0.764)|-1
SSGDVVMTQTPLSLPVTPGEPASISCRSSESLLHSNGNTYLHWYLQKPGQSPQLLIYKVT
NRESGVPDRFSGSGSGTDFTLKISRVEPEDVGVYYCMQGTKAP
>V98RF-JABR01061517.1-igkv |(25345, 25645)|2.99698000014|(0.998,1.000,0.999)|-1
ARCDIQMTQSPSSLSASVGDRVTITCRSSQGINNYLSWCQQKPGKAPKPLIYYASSLETG
VPSRFSGSGSGTDFTLTISSLQPEDIATYYCQQYDNLP
>V99RF-JABR01063291.1-ighv |(13950, 14265)|2.96611631225|(0.986,1.000,0.981)|-1
VQCEVQLVESGGGLVQPGGSLRLSCAASGFTFSNHYMHWVHQAPGKGLEWVGFIRNNANG
ATTEYAASVKGRFTISRDDSKSVASLQMNSLKTEDTAVYYCAR
>V100RF-JABR01063291.1-ighv |(28996, 29310)|1.76535672645|(0.792,0.710,0.530)|-1
VLSQVTLKESGPALVKPTQTLTLTCTFSGFSLSTSGMGVGWIRQPPGKALEWLALIYWDD
DKRYSPSLKSRLTISKDTSKNQVVLTMTNMDPVDTATYYCVRR
>V101RF-JABR01064858.1-igkv |(492, 807)|2.67809566879|(0.971,0.838,0.941)|-1
SSGDVVMTQSPLSLPVTPGQPASISCRSSQSLVHSDGNTYLSWFQQKPGQPPRRLIYKVS
NRDSGVPDRFSGSGAGTDFTLKISRVEAEDVGVYYCLQGTYFP
>V102RF-JABR01067077.1-igkv |(7134, 7447)|2.49060438312|(0.934,0.982,0.733)|-1
SSGDVVMTQTPLSLSVTPGEPASISCRSSQSLLHSNGNTYLHWYLQKPGQSPQLLIYKVT
NRESGIPDRFSGSASGTDFTLKINRVEHEDVGVYYCMQSTKF
>V103RF-JABR01068488.1-ighv |(524, 833)|2.93906440553|(0.984,0.987,0.969)|-1
AQSQVQLVQSGAEVKKPGASVKVSCKASGYNFRSSAISWVRQAPGQGLEWMGVIIPILSR
TNYAQKFQGRVTITADTSTSTAYMELSSLRSEDTAVYYCTR
>V104RF-JABR01071855.1-iglv |(8003, 8306)|2.99798400013|(1.000,0.998,1.000)|-1
SWAQSALTQPPSVSGSPGQSVTISCTGTSSDVGGYNYVSWYQQHPGTAPKLMIYDVSNRP
SGVSDRFSGSKSGNTASLTISGLQAEDEADYYCCSYAGS
>V105RF-JABR01071855.1-iglv |(31384, 31694)|2.98120030738|(0.998,0.984,1.000)|-1
SWAQSALTQPRSVSGSPGQSVTISCTGTSNDVGSYNSVSWYQQHPGKAPKLVIYEVSKRP
SGVSDRFSGSKSGNTASLTISGLQAEDEADYYCSSYAGSGT
>V106RF-JABR01071855.1-iglv |(60946, 61249)|2.9824040992|(1.000,0.993,0.990)|-1
SAASYELTQPPSVSVSPGQTARITCSGDTLPDNYAYWFQQKPGQSPVLIIYEDSKRPSGI
PERFSGSSSGTVATLTISGAQVEDEADYYCYSSDSSGNH
>V107RF-JABR01071855.1-iglv |(71726, 72036)|2.94562728311|(0.999,0.956,0.998)|-1
SWAQSALTQPPSVSGSPGQSVTISCTGTSSDIGGYNYVSWYQQHPGTALKLMIYGVSNRP
SGVSDRFSGSKSGNTASLTISGLQAEDEADYYCSSYSSSYY
>V108RF-JABR01071855.1-iglv |(89714, 90006)|1.95967681903|(0.732,0.890,0.553)|-1
CPDSASLSGSSGQLVTISCTGTSSDVGSYNIVSWYQQHPGTGPQLMIYHVSYRPSGVPDR
FSGSKSGNTASMIISGFQVEEEADYYCYSYTSSIT
>V109RF-JABR01071856.1-iglv |(32049, 32337)|2.03794252859|(0.742,0.776,0.601)|-1
SWAQSALTQPRSVSGSPGQSVTISCTGTSSDVGHYNCFLVSSAPRHMIYGVSKWPSGVSD
HFSGSKSGNTVSMTISGLQAEDEADYYCCSYAGS
>V110RF-JABR01071856.1-iglv |(35802, 36107)|2.92748707911|(0.994,0.960,0.979)|-1
SVASYELTQPPSVSVSPGQTAKITCSGDILAKYYAQWYQQKPGQAPVLVIYKDSERPSGI
PERFSGSSSGTTVTLTISRAQAEDEADYYCYSGDDNNLTV
>V111RF-JABR01071856.1-iglv |(45472, 45775)|2.99798400013|(1.000,1.000,0.998)|-1
SWAQSALTQPRSVSGSPGQSVTISCTGTSNDVGSYNSVSWYQQHPGKAPKLVIYEVSKRP
SGVSDRFSGSKSGNTASLTISGLQAEDEADYYCCSYTTS
>V112RF-JABR01071856.1-iglv |(57958, 58263)|2.64792135702|(0.963,0.804,0.978)|-1
FVASYELTQPPSVSVSPRQTARITCGGDNIGSKAVHWYQQKPAQAPVLVIYNDSERPSGI
PERFSGSNSGNTATLTISGVQAGDEADYYCQVWDSSSATV
>V113RF-JABR01071856.1-iglv |(64968, 65271)|2.96417355698|(0.997,0.976,0.993)|-1
SVVSSELTQDPAVSVALGQTVKITCQGDSLSSYYASWYQQKPGQVPVLVIYGNSNRPSGI
PDRFSGSYSGNTASLTITGAQVEDEADYYCGSWDSSGNY
>V114RF-JABR01071856.1-iglv |(85218, 85521)|2.9338228881|(0.999,0.946,1.000)|-1
SAASYELTQPPSESVSPGQTARITCGGDNIGSKAVHWYQQKPAQVPVLVIYSDSNRPSGI
PERFSGSNSGNTATLTISGVEAGDEADYYCQVWDSSSDH
>V115RF-JABR01071856.1-iglv |(89682, 89985)|1.64860494786|(0.857,0.513,0.724)|-1
SVVSSELTQDPALSVALGHTVRITCQGDSLKTYYASWYQQKPGQVPVLVIYGNSNRPSGI
PGRFSSSYSGNTGSLTITAAQVEDEAVYYCHSWDSSGNY
>V116RF-JABR01071856.1-iglv |(104914, 105217)|2.98642016586|(1.000,0.988,0.999)|-1
SWAQSALTQPRSVSGSPGQSVTISCTGTSSDIGGYNLVSWYQQHPGTAPKLVIYDVSKRP
SGVSDRFSGSKSGNTASLTISGLQAEDEADYYCCSYAGS
>V117RF-JABR01071856.1-iglv |(114426, 114723)|2.9179362071|(0.975,0.996,0.951)|-1
SVASYELTQPPSVSVSPGQTARITCSGDVLKENYADWYQQKPGQAPVLVIHEDSKRPSGI
PEQFSGSTSGDTNTLTISSSLSEDEADYYCFSGNENN
>V118RF-JABR01071856.1-iglv |(122751, 123054)|2.99280401921|(1.000,0.993,1.000)|-1
SAASYDVTQPQSVSVSPGQTARITCGGDNIGSKAVHWYQQKPAQAPVLVIYDDSERPSGI
PERFSGSNSGNTATLTISGVEAGDEADYYCQVWDSSSDH
>V119RF-JABR01071859.1-iglv |(21796, 22105)|2.99496000066|(0.999,0.996,1.000)|-1
SWAQSVLTQPPSASEAARKSVTISCSGSSSNIGSNRVSWYQQLPGTAPKLLIYNNNQRPS
GVPDRFSGSKSGTSASLAISGLQTEDEADYYCAAWDDSLSS
>V120RF-JABR01071860.1-iglv |(8080, 8387)|1.97506699942|(0.868,0.846,0.567)|-1
SNSQAVVTQEPSLTVSPGGTVTLTCASSTGAVTSGNYPYWFQQKPGQAPTALIYATSSKH
SWTPARFSGSILGGKAALTLSGAQPEDEADYYCSLYYSGA
>V121RF-JABR01071860.1-iglv |(15235, 15523)|2.2136779959|(0.910,0.624,0.976)|-1
SPGASARLTCTLGSGISVGSYSIYWYQQKPGSPPRYLLYYYSDSDKGLGSGVPSRFSGSK
DASANTGILLISGLQSEDEADYYCAVSYSSASHS
>V122RF-JABR01071860.1-iglv |(31436, 31745)|2.98208440501|(1.000,0.985,0.998)|-1
SWAQSVLTQPPSVSGVPGQKVTISCTGSSSNIGGYYVQWYQQLPGTAPKLLIYQDNKRPS
GVSDRFSGSKSGTSASLAITGLQSEDEADYYCGTWDSSLNG
>V123RF-JABR01071860.1-iglv |(36557, 36866)|3.0|(1.000,1.000,1.000)|-1
SWAQSVLTQPPSVSGAPGQKVTISCTGSSSNIGGYYVSWYQQLPGTAPKLLIYQDNKRPS
GISDRFSGSKSGTSASLAITGLQTEDEADYYCQSYDSSLSG
>V124RF-JABR01071861.1-iglv |(13029, 13339)|2.65197460799|(0.897,0.906,0.856)|-1
SLSQPVLTQPASLSASPGASASLTCTFSGGINVAGYHIHWYQQKPGSPPRYLLWYKSDSD
KHQGSGVPSHFSGSKDASANTGILRISGLQSEDEADYYCAI
>V125RF-JABR01071861.1-iglv |(18449, 18758)|2.98976801985|(1.000,0.993,0.997)|-1
SWAQSVLTQPPSASGIPGQSVTISCSGSSSNIGSNNVYWYQQFPGTAPKLLIYNNNQRPS
GVPDRFSGSKSGTSASLAISGLRSEDEADYYCEAWDDNLSG
>V126RF-JABR01071862.1-iglv |(27039, 27346)|1.85810279743|(0.801,0.863,0.505)|-1
SNSQAVVTQEPSLTVSPGGTVTLTCGSSTGAVTSGNYPYWFQQKPGQAPRALIYNTNSKY
SWTPARFSGSLAEGKAALTLSGAQPEDEAEYYCLLYHSGT
>V127RF-JABR01071862.1-iglv |(60745, 61055)|2.56620202013|(0.993,0.948,0.788)|-1
SLSQPVLTQPASLSASPGASASLTCTFSSGINVAGYTIHWYQQKPGSPPRYLLRYKSDSD
KHQGSGVPSRFSGSKDASANTGILRISGLQSEDEADYYCAI
>V128RF-JABR01071862.1-iglv |(65675, 65984)|2.99594800078|(0.997,0.999,1.000)|-1
SWAQSVLTQPPSASGAPGQSVTISCSGSSSNIRGNGVHWYQQLSGTAPKILIYNNNQRPS
GVPDRFSGSKSGTSASLAITGLRSEDEADYYCEAWDDSLSA
>V129RF-JABR01071862.1-iglv |(83033, 83345)|2.994900005|(1.000,0.995,1.000)|-1
SWAQSVLTQPPSVSGTPGQRVTISCTGSSSNIGVGYYVSWYQQLPGTAPKLLIYQDNKRP
SGISDRFSGSKSGTSASLAITGLQSEDEADYYCQSYDNSLSG
>V130RF-JABR01071862.1-iglv |(111105, 111415)|2.95093047006|(0.999,0.960,0.998)|-1
SLSQPVLTQPTSLSASPGASARLTCTLSSGINVGSYRIFWYQQKPGSAPRYLLSYYTDSD
KHQGSGVPSRFSGSKDASANAGILLISGLQSEDEADYYCMI
>V131RF-JABR01071862.1-iglv |(116435, 116744)|2.98793200206|(0.997,0.993,0.998)|-1
SWAQSVLTQPRSASGTPGQRVTISCSGSSSNTGSNYVSWYQQLPGTAPKPLIYYDDKQAS
GVSDRFSGSKSGTSASLAISGLQSEDEADYYCATWDNSLSG
>V132RF-JABR01077598.1-igkv |(2147, 2457)|1.88487897521|(0.644,0.653,0.597)|-1
SLSQPVLTQSPSASASLGASVKLTCTLSSGHSSYTIAWHQQQPEKAPRYLMKLNSDGSHS
KGDGIPDRFSGSSSGAERYLTISNLQSEDEADYYCQTWDTG
>V133RF-JABR01077601.1-iglv |(19390, 19700)|2.97530822856|(0.997,0.984,0.995)|-1
SWANFMLTQPHSVSGSVGQKVVISCTRSSGSIGSYYVQWYQQRPGSAPTTVIYDDNERPS
GVPDRFSGSIDSSSNSASLTISGLETEDEADYYCQSYDSSS
>V134RF-JABR01077601.1-iglv |(49250, 49551)|1.89211990847|(0.774,0.515,0.917)|-1
VQAGLTQPPSVSKGLRQTATLTCTGSSNNVGNQGAAWLQQHQGHPPKLLSYRNNNRPSGI
SERFSASRSGNTASLTITGLQPEDEADYYCSAWDSSLS
>V135RF-JABR01077601.1-iglv |(59589, 59901)|2.99798400013|(1.000,0.998,1.000)|-1
SWAEVVFTQPHSVSGSPGQTVTISCTRSSGSIGSYYVQWYQQRPGSAPTTVIYNDNKRPS
GVPDRFSGSIDSSSNSASLTISGLKSEDEADYYCQSAADSYS
>V136RF-JABR01077603.1-iglv |(14585, 14894)|2.9899000027|(0.999,0.995,0.996)|-1
VDSETEVTQEPSLSVSPGGTVTLTCGLSSGSVSTSNYPSWYQQTPGQAPRMIIYNTNTRP
SGVPDRFSGSILGNKAALTITGAEADDESDYYCVLYMGSGI
>V137RF-JABR01077916.1-ighv |(11011, 11320)|3.0|(1.000,1.000,1.000)|-1
VQCEVQLVESGGDLVKPGGSLRLSCVASGFTFSSYAMHWVRQAPGKGLEWVSVISTSGGS
TYYADSVKGRFTISRDNAKNSLSLQMNSLRAEDTAVYYCAR
>V138RF-JABR01077916.1-ighv |(16007, 16319)|2.98057605748|(0.995,0.986,1.000)|-1
VLSQVQLQESGPGLVKPLETLSLTCAVSGYSISSGYYWSWIRQPPGKGLEWIGRIYGSSG
STDYNPSLKSRVTISKDTSKNQFSLKLSSVTAEDTAVYYCAR
>V139RF-JABR01077917.1-ighv |(3891, 4200)|2.98159608|(0.997,0.987,0.998)|-1
VLSQVQLQQWGEGLVKPSETLSLTCAVSGGSISSYWWSWIRQPPGKGLEWIGEINGNSGS
TNYNPSLKSRVTISTDTSKNQFSLKLSSVTAADTAVYYCAR
>V140RF-JABR01077917.1-ighv |(15725, 16034)|2.92331040301|(0.987,0.975,0.964)|-1
VQCEVQLVESGGGLVQPGGFLRLSCAGSGFAFSSYGMDWVRQAPGKGLEWVAVISYDGSQ
KYYADSVKDRFTISRDNSKNMLYLQMNNLRAEDTAVYYCAK
>V141RF-JABR01078980.1-ighv |(7987, 8296)|2.99194800078|(0.997,1.000,0.995)|-1
AQSQEQLVQSGAEVKKPGASVKVSCKASGFTFDSYAISWVRQAPGQGLEWMGWIVPDYDI
TNYAQKFQGRVTITADTSTSTAYMELSSLRSEDTAVYYCAR
>V142RF-JABR01086102.1-ighv |(13684, 13993)|2.96035913276|(0.998,0.992,0.973)|-1
AQSQEQLVQSGAEVKKPGASVKVSCKASGYTFSSYAISWVRQAPGQGLEWMGVINPIVGI
TNYAQKFQGRVTITADTSTSTAYMELSSLRSEDTAVYYCAR
>V143RF-JABR01088213.1-trbv |(2386, 2682)|2.97080001921|(0.993,0.992,0.986)|-1
SVDAGVTQSPTHLIKMRGQQVTLRCSPISGHNSVSWYQQALGQGPQLIVQYYREQENGRG
NFPERFSGHQFPNYSSELNVSALLLVDSALYLCASSL
>V144RF-JABR01088213.1-trbv |(19985, 20282)|2.0557452264|(0.923,0.589,0.905)|-1
SVAAGVIQAPRHLIKVKRETATLQCYPIPEHDTVYWYQQGPGQGPQFLISFYEKMQRDKG
SIPDRFSAQQFSDYHSELNMRSLELEDSALYLCASSL
>V145RF-JABR01088213.1-trbv |(27616, 27913)|2.97961205453|(0.995,0.999,0.986)|-1
HMDAGITQSPRHKITETGTPVTLRCHQTENHRYMYWYRQDLGYGLRLIHYSYGVEDTDKV
EVSDGYSVSRSKTEDFLLTLESATHSQTSVYLCASSE
>V146RF-JABR01088213.1-trbv |(44902, 45202)|2.17432332549|(0.754,0.671,0.779)|-1
HTDAGVIQSPRHEVTEMGKEVTLRCEPISGHNSLFWYRQTMMWGLELLIYFNNKAAIDDS
GMPKDRFSAEMPDASLATLKIQPSEPRDSAVYLCASGL
>V147RF-JABR01088214.1-trbv |(3878, 4174)|2.71846301927|(0.890,0.885,0.967)|-1
PGNAAVTQTPKFQVLKTGQSMTLQCAQDMNHECMSWYRQDPGMGLRLIHYSVAAGVTDKG
EVSNGYNVSRSNTEDFPLSLESAAPSQTSVHFCASSY
>V148RF-JABR01088214.1-trbv |(9866, 10166)|2.98280001921|(0.997,0.990,0.996)|-1
HTCAGVSQSPRYKVTKRGQDVTLRCDPISGHEYLYWYQQVPGQGREFLTYFQNDAQLDKS
GLPSDRFSAERPEGSISILKIQRTEQGDSAVYLCASSL
>V149RF-JABR01088214.1-trbv |(18277, 18573)|2.42768516185|(0.983,0.827,0.816)|-1
PVDTGVTQSPTHLIKTRGQQVILRCSPISGHSSVSWYQQALGQGPQFIFEYYKEEERERG
NFPERFSGRQFPNYSSELNVNTLEMGDSALYLCASSL
>V150RF-JABR01088214.1-trbv |(26048, 26345)|2.40140095306|(0.985,1.000,0.698)|-1
PGNADVTQTPKFQVLKTGQSMTLQCAQDMNHNYMYWYRQDPGMGLRLIHYSVGAGITDKG
DVPNGYNVSRLNTEDFPLRLELAALSQTSVYFCASSD
>V151RF-JABR01088214.1-trbv |(38458, 38754)|2.58065863741|(0.970,0.963,0.781)|-1
SVDAGVTQSPTHLIKTRGEQVTLRCSPISGHSSVSWYQQALGQGPQFIFEYYEKAERGRG
NFPERFSGLQFPNYSSELNVNALLLGDSALYLCASSL
>V152RF-JABR01088214.1-trbv |(45860, 46151)|2.98521630725|(1.000,1.000,0.986)|-1
NAGVTQTPKFQVLKTGQSMTVQCTQDMNHNYMYWYRQDPGMGLRLIYYSVTAGITTKGEV
SNGYNVSRINTEDFLLRLESAAPSQTSVYFCASSY
>V153RF-JABR01088215.1-trbv |(4946, 5242)|2.96984443764|(0.998,0.990,0.983)|-1
PVQAGVTQSPTYLIKRRGQQVTLRCSPISGHTSVSWYQQALGQGPQFIFEYSNELRTSEG
NFPDRFSGRQFRNYHSEMNVSALELGDSALYLCASSF
>V154RF-JABR01088215.1-trbv |(7599, 7895)|2.95438267424|(0.998,0.997,0.964)|-1
SVDSGVTQTPKHLITAIGQQVTLRCSPRSGDLSVYWYQQSLGQGLQFLIQYYNGKERAKG
NILERFSAQQFPDLHSELNLSSLELGDSALYFCASSL
>V155RF-JABR01088215.1-trbv |(24838, 25129)|2.50177872011|(0.925,0.805,0.850)|-1
AGVAQSPRYKITEKSQAVAFWCDPISGHATLYWYRQILGQGPELLVRFQNEDVVDDSQLP
KDRFSAERLKGVNSTLRIQPAELGDSAVYLCASSL
>V156RF-JABR01088215.1-trbv |(38689, 38986)|2.14587740282|(0.890,0.606,0.933)|-1
HRDARITQSPRYKITETGRQVTLTCHQTWSHNNMFWYRQDLGHGLRLIYYSAGAGVTDKG
EVPDGYVVSRSKTEDFPLTVESATRSQTSVYFCASSE
>V157RF-JABR01088215.1-trbv |(46617, 46908)|2.32455968508|(0.906,0.899,0.690)|-1
AGVAQSPRYKVIEKSQAVTFWCNPVSGHATLYWYRQILGQGPELLVQFQNNDVVDDSQLP
KDRFSAERLKGVNSTLKIQPAKLGDSAVYLCASSL
>V158RF-JABR01088215.1-trbv |(64243, 64539)|2.99696400065|(1.000,1.000,0.997)|-1
PVNAGVTQTPKFQVLKTGQSMILQCAQDMNHDYMYWYRQDPGMGLRLIHYSVGAGITDKG
EVSNGYSVSRSNTEDFPLRLESAAPSQTSVYFCASSY
>V159RF-JABR01088215.1-trbv |(68443, 68744)|1.94231126738|(0.884,0.768,0.607)|-1
AGVSQSPRYRVTKRRQEVALRCDPISGHEYLYWYQQAPGQGPEFLIYFRNDAQLDKSGLL
SSRFSAERPKGSVSTLKIQHTEQGDAAVYLCASSLATE
>V160RF-JABR01088215.1-trbv |(76395, 76685)|1.89831831021|(0.900,0.883,0.533)|-1
DAGVTQSPTHLIKTRGQQVTLRCSPISGHTNVYWYQQTLDQGLQFILWYDEEEERDRGTF
PHRFLGLQFPNYSSELNVSALLLGDSALYLCASSL
>V161RF-JABR01088215.1-trbv |(87775, 88076)|2.57951395414|(0.892,0.930,0.798)|-1
AGVLQSPRYRVTKRGQDVTLRCDPISGHEYLYWYQQAPGQGPEFLTYFWNDAQQDKSGLP
SGRFSAERPEGSVSTLKIQPTQQGDSAVYLCASSLATE
>V162RF-JABR01088215.1-trbv |(102278, 102574)|2.18589534821|(0.914,0.961,0.617)|-1
NAGVTQTSKFQVLKTGQNMTVQCAQDMNHNFMYWYRQDPGMGLRLIHYSGAAGTTDKGEV
PNGYNVSRLNTEVFPLRLESAAPSQTSVYICACGYST
>V163RF-JABR01088215.1-trbv |(106852, 107152)|2.95330075255|(0.984,0.971,1.000)|-1
HTGAGVSQSPRYKVSKRGQEVALRCDPISGHAALYWYQQALGQGPELLTYFNYEAQQDKS
GLLSDRFSAERPEGSVSTLTIERTEQGDSAVYLCASSL
>V164RF-JABR01088215.1-trbv |(114804, 115100)|2.177368456|(0.688,0.859,0.763)|-1
PVDTEVTQSPTHLIKTRGQQVTLRCSPISGHSSVYWHQQTLGQGPQLIFEYDRKEERGRG
NFPDRFSGRQFPNYSSELNVNASEMGDSALYLCASSL
>V165RF-JABR01088216.1-trbv |(3479, 3776)|2.991900005|(0.999,0.999,0.994)|-1
PANAGVTQSPKFQILKTGQSMTLQCAQDMNHNSMYWYRQDPGMGLRLIHYSVAENTTDTG
EVPDGYSVSRLKKKDFLLRLESAAPSQTSVYFCASSE
>V166RF-JABR01088216.1-trbv |(16712, 17025)|2.52846093309|(0.982,0.810,0.885)|-1
PLDTAVSQTLKYLVTQTGEKESLKCEQNLGHNAMYWYKQDSKKLLQIMFIYNNQEPILNE
TVPDRFSPKSPDKAHLILHIKSVELGDSAVYFCASSQDTALQ
>V167RF-JABR01088216.1-trbv |(20140, 20437)|2.05642845354|(0.844,0.607,0.811)|-1
PMETGVMQTPRHLVMGMTNKKPLKCEQHLGHNAMYWYKQKAKKPLELMFVYNFKERAENN
SVPSRFVPECPDSSHLYLHVRALQPEDSALYFCASSQ
>V168RF-JABR01088216.1-trav |(30363, 30669)|1.60528099736|(0.593,0.453,0.818)|-1
QSMTLQCAQDMNHERMYWYRQDPGMGLRLIHYSVAENTTDKGEVPDGYSVSRLNKKDFLL
RLESAAPSQTSVYFCASSEATVLHGRLLSAHKGRRGSALI
>V169RF-JABR01088216.1-trbv |(32988, 33285)|2.99899200002|(0.999,1.000,1.000)|-1
PVNAGVTQTPKFQILKTGQSMTLQCAQDMNHNYMYWYRQDPGMGLRLIHYSVGKGSTDTG
EVPDGYSVSRSNLQNFMLRLESAAPSQTSVYFCASSE
>V170RF-JABR01088216.1-trbv |(36726, 37026)|2.19060004893|(0.981,1.000,0.619)|-1
HTGAGVSQSPRNKVTEEGKDVVLRCDPISGHTALYWYRQSLGKGLEFLIYFQGKDAPDKS
GLPSGRFSVERPEGSVSTLKIQPTQQGDSAVYLCASSL
>V171RF-JABR01092598.1-ighv |(8862, 9169)|2.74956068306|(0.990,0.879,0.939)|-1
AHSEVQLVQSGAEVRKPGATVKISCKASGYTFTGYYLHWVRQAPGKGLEWMGLVDPEDGE
ANYAQKFQGRVTMTADTSTDTAYMELSSLRSEDTAVYYCA
>V172RF-JABR01098590.1-trav |(5160, 5460)|2.97592430843|(1.000,0.987,0.990)|-1
FSMAQTVTQSQPEMSVQEAETVTLSCTYDTSDSDYYLFWYKQPPSRQMILIIRQEAYKQQ
NATENRFSVNFQKAAKSFSLKISDSQLGDAAGYFCAYR
>V173RF-JABR01098592.1-trdv |(18652, 18953)|2.78161093835|(0.999,0.997,0.860)|-1
SSMAQTVTQSQPEMSVQEAETVTLNCTYDTSESNYYLFWYKQPPSRQMILIIRQEAYKQQ
NAKENRFSVNFQKAAKSFSLKISDSQLGDAAMYFCAFM
>V174RF-JABR01098593.1-trav |(12562, 12849)|2.03431270794|(0.657,0.676,0.873)|-1
VSSQELEQSPQSLIIQEGKNLTINCTSSKTLYSLHWYKQKYGEGLIFLMMLQKGGEEKSH
EKITAKLDEKKQQSFLHITASQPSHAGIYLCGGD
>V175RF-JABR01098593.1-trav |(29181, 29471)|2.58020777517|(0.892,0.798,0.931)|-1
VSSEDKVVQNPLSLVVHEGDTVTLNCSYEVINFRSLLWYKQEKKAPTFLFMLTSSGFDKK
KGRLSGILDKKELFSILNITATQTRDSAIYLCAVE
>V176RF-JABR01098595.1-trav |(1678, 1977)|2.55939586679|(0.980,0.991,0.762)|-1
VNGQQIMQIPQYQHVQEGEDFTTYCNSSTTLNNIQWYKQRPGGHPVFLIVLVKSGEVKKQ
KRLTFQFGEAKKNSSLHITATQTTDVGTYFCAGHSAPQ
>V177RF-JABR01098595.1-trav |(12709, 12999)|2.25578695659|(0.947,0.674,0.901)|-1
TIIDAKTTQPTSMDCAEGRGANLPCNHSTISGNEYIYWYRQIHSQGPQYVIHGLKNNETN
AMASLIITEDRKSSTLILPHATLRDTAVYYCIVRV
>V178RF-JABR01098595.1-trav |(53343, 53631)|1.72914536788|(0.588,0.526,0.642)|-1
KQNPPSLSVQEGGISILNCDYTNSMFDYFLWYKKYPAEGPTSLISISSIKDKKEEGRFTV
FLNKSAKHLSLHIGASQPGDSAMYLCAASAQCSP
>V179RF-JABR01098595.1-trav |(58455, 58742)|2.10228179446|(0.814,0.658,0.743)|-1
VRSQKPVQGPQAVILQEGEDAIINCNSSKALYSVHWYRQKHGEVPVFLMILLKGGEQKSH
DKIVATFNEKKHQSSLYLMASQLSYSGTYFCGAE
>V180RF-JABR01098596.1-trav |(10039, 10351)|1.55536721001|(0.630,0.484,0.549)|-1
VIGIQVEQSPPDLILQEGANSTLRCNYSATVSNLQWFHQNPWGQLINLFYIPSGTKQNGR
LSATTVTSERYSLLHISSSQTTDSGIYFCAVEPQYSPGTCSL
>V181RF-JABR01098596.1-trav |(31032, 31347)|1.50357242239|(0.785,0.556,0.550)|-1
GVSGQQKEKSDRQQVKQSPQSLIVQKGEISIINCAYENSAFDYFPWYRQFPGKGPALLIA
IRSAMSEKEEGRFKIFFNKSAKNFSLHIMDSQPGDSATYFCAA
>V182RF-JABR01098596.1-trav |(39751, 40051)|2.08129190141|(0.813,0.606,0.820)|-1
FSVAQKVTQAQSSVSMPVGKAVTLNCQYETSSWSYHIFWYKQLPGKEMIFLIRQGSSEQN
AKNGRYSVNFEKAASSITLTISALQLEDSATYFCALWE
>V183RF-JABR01098597.1-trav |(9844, 10131)|2.38652589709|(0.945,0.702,0.950)|-1
LSGEDQVTQSPEALRLQEGQSSSLNCSYTASNLRGLLWYRQDPGKGPEFLFILYSAGEEK
EKERLKATLTKKESFLHITGPKPEDSATYLCAVQ
>V184RF-JABR01098597.1-trav |(21891, 22182)|2.30484773634|(0.881,0.660,0.979)|-1
VSSKQEVTQIPAALSVPEGDNLVLNCSFTDSAIYNLQWFRQDPGKGLTSLLLIQSSQREQ
TSGRLNASLDKSSRHSTLYITASEPGDSATYLCAV
>V185RF-JABR01098598.1-trav |(19033, 19320)|2.98174002125|(0.995,0.988,0.999)|-1
VNSQQGEEDPQALSIQEGENATMNCSYKTSIDNLQWYRQDSGRSLVRLILIRSNEREKSS
GRLRVTLDTSKKSSSLLITASRAADTASYFCATD
>V186RF-JABR01098598.1-trav |(25184, 25475)|2.97806440553|(0.997,1.000,0.982)|-1
RTNGDSVTQTEGPVTLPERAALTLNCTYQTSYSAFMFWYVQYLNKEPELLLKSSENQETD
SRGFQASHVKSDSSFHLEKLSVQLSDSAVYYCVLR
>V187RF-JABR01098598.1-trav |(28683, 28986)|2.9349882524|(0.990,0.963,0.985)|-1
SSMAQKVTQAQTEISVVEKEDVNLDCVYETRDSTYYLFWYKQPPSGELIFLIRQNSFNEQ
NEINGRYSSNFQKSTSSFNLTITASQVVDSAVYFCALNE
>V188RF-JABR01098599.1-trav |(7776, 8069)|2.9939280013|(1.000,0.997,0.997)|-1
VWSQQKEVEQNPGPLSVPEGATASLNCTYSNSAFQYFMWYKQYSRKGPQLLIYTYSSGDK
EDGRFTAQVDKSSKYISLFIRDSQPSDSATYFCAMS
>V189RF-JABR01098599.1-trav |(19604, 19904)|1.51190015036|(0.889,0.687,0.515)|-1
GTRAQSVTQLDRQVPVFEEAPVLLRCNYSSSSVSVYLFWYVQYPNQGLQLLLKYLSGPTL
VKGINGFEAEFKKSETSFHLRKPSAHISDTAEYFCAVS
>V190RF-JABR01098600.1-trav |(14202, 14490)|2.9654040992|(0.983,0.990,0.993)|-1
VWSQQKVEQNSGSLSVPEGAIASLNCTYSDRGSQSFLWYRQYSGQSPELLISTYSSGDKE
DGRFTAQLNKASQYVSLLIRDSQLSDSATYLCVV
>V191RF-JABR01098600.1-trav |(20988, 21285)|2.92715364218|(0.994,0.958,0.981)|-1
GTRAQSVTQLDSQVSVSEGVPVLLRCNYSSSFSPSLFWYVQYPNQGLQLLLKYISGTALV
KGINGFEAEFKKSETTFHLTKASAHVSDAAEYFCAVS
>V192RF-JABR01098600.1-trav |(26541, 26838)|3.0|(1.000,1.000,1.000)|-1
TARAQSVTQPDIHITVSEGASLELRCNYSYGATPSLFWYVQSPGQGLQLLLKYFSGDTLV
QGIKGFEAEFKRSQYSFNLRKPSVHWSDAAEYFCAAG
>V193RF-JABR01098600.1-trav |(40729, 41022)|2.95610320239|(0.998,0.973,0.988)|-1
VSRGESVGLHLPTVSVQEGDNSVINCTYSDSVSDYFLWYKQESGKGPQFIIDIRSNMAKR
QGQRLTVLLNKTVKHLSLQIAATEPGDSAVYFCAEN
>V194RF-JABR01098600.1-trav |(52617, 52918)|2.92866172079|(0.988,0.967,0.976)|-1
SGIAQKITQTQPAMFMQEKEAVTLDCTYDTSDQNYGLFWYKQPSSGEMIFLIHQESYDKQ
NATEGRYSLNFQKARKSINLIISASQVGDSAMYFCAMR
>V195RF-JABR01098600.1-trav |(72791, 73095)|2.72976485398|(0.968,0.902,0.897)|-1
TQMQGPVTLSERAFLTINCTYTATGYPSLFWYVQYPGEGPQLLLKAAKDDDKGSNKDFEA
TYRKETTSFHLEKDSVQESDSAVYFCALSDTVTGTARGV
>V196RF-JABR01098601.1-trav |(15930, 16220)|2.99799600001|(0.999,1.000,0.999)|-1
VNGENVEQHPSILSVQEGDSSVIKCTYSDSASNYFPWYKQELGKGPQLIIDIRSNVHEKK
DQRITVLLNKTAKHFSLHITETQPGDSAVYFCAAS
>V197RF-JABR01098603.1-trav |(9193, 9499)|2.99798400013|(1.000,1.000,0.998)|-1
VWSQQKEVEQDPGPFSVPEGATVTFNCTYSNSASQSFFWYRQDSRKEPKLLMSVYSSGNE
DGRFTAQLNRASQYISLLIRDSQLSDSATYLCAVRTQCSP
>V198RF-JABR01098603.1-trav |(14624, 14921)|2.26855962926|(0.979,0.752,0.820)|-1
GTRAQSVTQLDSQVSVSEGVPVLLRCNYSSPVSPNLFWYVQYPNQGLQLLLKYTSGTTLV
KGINGFKAEFKKSETSFHLTKASAHVSDAAEYFCAVS
>V199RF-JABR01098604.1-trav |(11404, 11694)|2.99899600001|(1.000,1.000,0.999)|-1
MSRGEDVEQSLFLSVREGDISVINCTYTDSSSTYLYWYKQEPGAGLQLLTYILSNTDLKQ
DQRLTVLLNKKDKHLSLRIADTQTGDSAIYFCAES
>V200RF-JABR01098604.1-trav |(25125, 25413)|2.14404436939|(0.952,0.913,0.628)|-1
VKNQKIEQNSEALNIQEGKTATLTCNYTNYSPSYLQWYRQDPGRGPVFLLLIRENEKEKW
KERLKVTFDTTLKQSLFHITASQPADSATYLCAL
>V201RF-JABR01098604.1-trav |(37115, 37402)|2.93800040988|(0.983,0.968,0.988)|-1
ANGENQVEQSPRFLGPQQGDVAFMSCMYSVSRFNNLQWYRQNTGTGPKHLFSMYSAGYEK
QKGRLNATLLKNGSSLYITAMQPEDSATYFCAVD
>V202RF-JABR01098604.1-trav |(64438, 64732)|2.99294800078|(0.996,0.999,0.998)|-1
EINGDSVVQTEGQVLLSEGDSLIVNCSYESTQYPSLFWYVQYPGEGPQLLLKAMMANDKE
SNKGFEATYHKETTSFHLKKDSVQESDSAVYFCALS
>V203RF-JABR01098604.1-trav |(77658, 77951)|2.98660803841|(0.991,0.998,0.998)|-1
GSGKNQVEQSPQSLIILEGKNCTLQCNYTVSPFNNLRWYKQDTGKGPISLTIMTFSENTK
LNGRYTATLDADTKQSSLHITATQLSDSASYICVVS
>V204RF-JABR01098606.1-trav |(22478, 22773)|2.38430607518|(0.956,0.753,0.862)|-1
DQVTVAEGNPLTVKCTYSVSGNPYLFWYVQYPKQGLQFLLKYITGDNLVKGSYGFEAEFN
KSQTSFHLKKPSALVSDSALYFCAVRDTLIGAAGGA
>V205RF-JABR01098609.1-trav |(14815, 15124)|1.87662365701|(0.839,0.821,0.532)|-1
TIMYLVIGTAGQSLEQPSEVTAVEGAIVQINCSYQTSRFDGLSWYQQHDGGAPTFLSYNA
LDGLEERGHFSSFLSRSDSYGYLLLQELQMKDSASYFCAVR
>V206RF-JABR01098609.1-trav |(38904, 39196)|1.85173260333|(0.715,0.519,0.774)|-1
MAGAIVQINCTYQTSGFNGLSWYQQHDGEAPTLLFYNVLDGLEEKGRFSSFLSNSKGYSY
LLLKELQMKDSASYLCAVRDTVTMRSLQLQQNSKG
>V207RF-JABR01184607.1-trbv |(64, 364)|2.98057605748|(0.995,1.000,0.986)|-1
HTGAGVSQSPRNKVTEKGKDVALRCDPISGHTVLYWYRQNLGQGLEFLIYFRGTGAVDDS
GLRSDQFSATRPEGSDSTLKIQCTEQRDSAMYFCASSL
>V208RF-JABR01190886.1-ighv |(459, 765)|2.9681523093|(0.993,0.997,0.979)|-1
CAEVQLVQSGAEVKRPGESLKISCKTSGYSFTSYWISWVRQMPGKGLEWMGMIYLGDSDT
RYSPSFQGQVTISADKSISTTYLQWSSLKASDTATYYCAK
>V0RF-AGCE01061995.1-trbv |(4895, 5202)|2.96420529852|(0.993,1.000,0.973)|1
PVTAGVTQTPKFQVLKSGQSMTLQCAQDMNHDGMYWYRQDPGMGLRLIHYSVGEGTTAKG
EVPDGYNVSRSNTKDFPLRLEAAAPSHTSVYFCASSDSTV
>V1RF-AGCE01061995.1-trbv |(16809, 17122)|2.98985201038|(0.999,0.998,0.993)|1
PLDSAVSQTPKYLVTQMGKKESLKCEQNLGHDTMYWYKQDSKKLLKIMFIYNNKEPILNE
TVPNRFSPESPDKAHLNLHIESLELGDSAVYFCASSQDTALQ
>V2RF-AGCE01061995.1-trbv |(20780, 21093)|2.34996269803|(0.918,0.844,0.735)|1
PMDTGVTQTPKHLVMGMAHNKSLKCEQNLGHNAMYWYKQKAKMPLELMFIYSFQKQTENN
SVSSRFTPECPDSSHLHLHLHALQPEDSALYLCASSQDTALQ
>V3RF-AGCE01061995.1-trbv |(27181, 27477)|2.29402997922|(0.926,0.750,0.798)|1
LGEAGVTQTPRHLIKMRGQQVTLRCSPVSGHNRVFWYQQAPGQGPQFLFNYYNEMQRQKG
NFPDRFSGHQFSNHSSEMNVSALELGDSALYLCASSL
>V4RF-AGCE01061995.1-trbv |(36451, 36748)|2.94896483513|(0.999,1.000,0.957)|1
PVNAGVTQTPKFQVLKTGQSITLQCAQDMNHDRMYWYRQDPGMGLRLIHYSVGEGTTAKG
EVPDGYKVSRSNTKDFPLRLEAAVPSQTSMYFCASSD
>V5RF-AGCE01061996.1-trbv |(2395, 2695)|2.19305742197|(0.946,0.867,0.669)|1
HTGAGVSQSPSNKVTEKGKDVILRCDPISGHNALYWYRQSPGKGLEFLIYFQGKDAPDKS
GLPSDRFFAERAGGSSSTLKIQRTEQNDSAVYLCASSL
>V6RF-AGCE01061997.1-trbv |(5744, 6035)|2.57264187933|(0.934,0.826,0.873)|1
AGVSQSPSHKVTEKGKDVALSCDPISGHTVLYWYRQSPGQGPEFLIYFQGKNIADDSGLS
SDRFSAERPMGSVSTLQIQRTEQADSAVYLCASSL
>V7RF-AGCE01061997.1-trbv |(11316, 11637)|2.15087155805|(0.860,0.728,0.713)|1
QAEVTQSPTHLIQTRGQQVTLRCSPISGHTSVSWYQQASGQGPQFIFEYVDELKRSEGNF
PGRFSGYQFSDYHSEMNISTLELEDSALYLCASSLAQPCRVTATL
>V8RF-AGCE01061997.1-trbv |(14025, 14315)|2.01807017642|(0.956,0.593,0.894)|1
DSGVTQTPKHLLTAIGQQVTLRCSPRSGDLSVYWYRQSLDQSLQFLIQYYNKNEGEKGNI
PERFSGNQFPNMSSELNLSSLELGDSALYFCASSI
>V9RF-AGCE01061998.1-trbv |(1696, 1993)|2.95843912445|(0.994,0.969,0.998)|1
HGDAEITQSPRHKGTETGRQVTLKCHQTWNHNYMYWYRQDLGHGLRLIHYSYGVQDINKG
EVSDGYVASRSNLEDFPLTLESALSSQTSVYFCASSD
>V10RF-AGCE01062000.1-trbv |(935, 1235)|2.5353256383|(0.862,0.883,0.805)|1
QTDAGVIQSPRHKVTQMGQSVTLRCEPISGHNDLLWYRQTLVQTLELLSYFRSQTRVDDS
EMPQDRFSAEMPNASFSSLRIQPTEPRDSALYLCASTF
>V11RF-AGCE01062000.1-trbv |(15550, 15847)|2.96964403777|(0.991,0.983,0.996)|1
HGDAEITQSPRHKVTKTRRQVTLKCHQTWNHNYMYWYRQDLGHGLRLIHYSVAADNTEKG
EVSHGYVVSRSNTEDFPLTLESATHSQTSVYFCASSD
>V12RF-AGCE01062000.1-trbv |(27286, 27586)|2.25555624085|(0.721,0.822,0.758)|1
CTDTGIIQSPKHEVTEMGQAVTLRCEPILGHNLLFWYRQTLVQGLELLSYFRGRSIIDDE
QMPKDRFSAERPDGSFSTLRIQPAEQGDSAVYICASRL
>V13RF-AGCE01062002.1-trbv |(433, 734)|2.91690279134|(0.989,0.978,0.955)|1
NAGVTQTPKFQVLKKGQSMTLQCAQDVNYDCMYWYRQDPGMGLRLIYYSVDEGITDKGEV
HHGYNVSRSNREDFPLRLEAAALFQTSVYFCAISASTV
>V14RF-AGCE01062002.1-trbv |(6169, 6469)|2.05787258333|(0.968,0.822,0.662)|1
HTGAGVSQSPRYKVTKRGLDIAFRCDPISGHEMLYWYRGTLGQSPEYLTYFQYEVQQDKS
GLPSDRFSAERTGGSFSTLKIQRTEQEDSAVYLCASSS
>V15RF-AGCE01062004.1-trbv |(4599, 4895)|2.56586191169|(0.912,0.920,0.791)|1
PVEAGVTQNPTHLIKTRGQQVTLRCSPISGHTSVSWYQQALGQGPEFILEYYEKKERNRG
NFPHRFSGHQFRDYSSDLNVSNLERGDSALYLCASSL
>V16RF-AGCE01062006.1-trbv |(795, 1091)|2.56586191169|(0.912,0.920,0.791)|1
PVEAGVTQNPTHLIKTRGQQVTLRCSPISGHTSVSWYQQALGQGPEFILEYYEKKERNRG
NFPHRFSGHQFRDYSSDLNVSNLERGDSALYLCASSL
>V17RF-AGCE01062008.1-trbv |(590, 890)|2.96440816598|(0.993,0.991,0.981)|1
HAGAGVSQDPRHKVTKTGQNVTFRCDPISGHNSLYWYRQTLGQSPEFLTYFQNEVQLDKS
GLPSDRFFAERTKGSFSTLKIQRTEQGDSAMYLCASSL
>V18RF-AGCE01062008.1-trbv |(6797, 7094)|2.94811631225|(0.986,0.972,0.991)|1
SVAAGVIQYPRHLIKEKRKTAILKCYPIPGHDTVYWYQQGPGQGLQFLISYYEKTQRDKG
SIPDRFTAQQFSDYHSELNMSSLELGDSALYLCASSL
>V19RF-AGCE01062009.1-trbv |(1447, 1744)|2.97989600501|(0.992,0.997,0.991)|1
HMDGRITQSPRHKVTETGTPVALRCHQTENHRYMYWYRQDLGHGLRLIYYSYGVKDISKG
EVPDGYNVSRSNTEDFPLTLESTTGSQTSVYFCASSD
>V20RF-AGCE01062009.1-trbv |(16503, 16803)|2.96971202074|(0.994,0.988,0.988)|1
HTDAGVIQSPQHKMTEMGQEVTLRCEPISGHTQLFWYRQTVMRGLELLTYFNNENLIDDS
GMPKDRFSAQMPNASFSTLKIQPSEPGDSAVYFCASSL
>V21RF-AGCE01062009.1-trbv |(38765, 39065)|2.94619216959|(0.983,0.992,0.972)|1
HTAAGVTQFPSHRVIEKGQAVTLRCDPISGHEYLYWYRRVMGKEIKFLIYFLRDSKQDES
GMPNHRFSAERTGGTNSTLKVQSAELEDSGIYFCASSL
>V22RF-AGCE01062009.1-trbv |(43861, 44158)|1.67143788786|(0.883,0.711,0.549)|1
HGDAMVIQNPRYQVTQSGKPVTLSCSQNLKHNAMYWYQQKPSQAPKLLLYYYDKDLNTEA
DTPDNFQSRRPNTSFCFLDIRSSGLGDAATYLCASSR
>V23RF-AGCE01062009.1-trbv |(48813, 49110)|2.02218212177|(0.862,0.578,0.858)|1
SPGEEVTQTPRHLVKAKGQKAILYCIPIIGHDYVFWYQQVRKEFKFLISFQNENIFDETG
MPKKRFSAKCTQNSPCSLEIQATEMQDSAVYLCASSQ
>V24RF-AGCE01062011.1-trbv |(9642, 9942)|2.34108035373|(0.843,0.700,0.883)|1
LSNAGVTQNPRHLVRRKGQEARLRCSPVKGHNHVYWYQQLLGEGLKFMIYLQRESTIDES
GMPKEQFSAEFPKEGPSVLRIQQAERGDSAAYFCASSV
>V25RF-AGCE01062012.1-trbv |(4859, 5168)|1.61540197492|(0.534,0.498,0.727)|1
GSGLGAVVSQHPSRVICKSGTSVKIECRALDFQATTMFWYRQSQKEGLMLMATSNEGSKA
TYEQGFSEDHFPISHPDLTSSSLTVASAQPEDSSFYLCSGR
>V26RF-AGCE01062012.1-trbv |(11525, 11825)|2.21167837268|(0.909,0.695,0.812)|1
SLDTKVTQRPRHVVTAKEQKAKMDCVPIKGHGYVYWYHKKLEEELKFLFYLQNGEIIQKA
EEINERFSAQCPENSPCALEIQSTESGDAGLYFCASSK
>V27RF-AGCE01062014.1-trbv |(10290, 10587)|2.04961842266|(0.665,0.940,0.716)|1
FMEADLYQTPRHCVIGTGKKITLECSQTMGHDRMYWYQQDPGMELKLIHYSHGVNSTEKG
DLSSESTVSRIRKENFLPTLESASPSSTSQYLCTSSE
>V28RF-AGCE01062014.1-trbv |(50744, 51041)|2.00540211879|(0.848,1.000,0.548)|1
PLEAQVTQNPRYLITVTGKKLTVTCSQNMNHEYMSWYRQDPGLGLRQIYYSNNVDLVDKG
DVPEGYNVSRKEKRNFPLILERPRPNQTSLYLCASSL
>V29RF-AGCE01062014.1-trbv |(56057, 56354)|2.56199627756|(0.920,0.801,0.898)|1
LVEVKVTQNPRYLVKRVGEKVFLECAQDMDHGRMFWYRQDPGLGLRLIYFSYDIKTDEEG
DVPDGYSVSREKKEQFSLILGSARTNQTSVYLCASSS
>V30RF-AGCE01062014.1-trbv |(68614, 68917)|1.90890246067|(0.599,0.737,0.662)|1
SVFGAVVSQKPSRGVCQRGTSMTIQCHVDSQVTLMFWYRQLPGQSMTLIATANQGSDATY
EKGFAKDKFPISRPNLVFSTLNVSNVSPEDSGVYFCSAG
>V31RF-AGCE01134597.1-igkv |(30724, 31039)|2.58169227278|(0.999,0.779,0.981)|1
STGDIVMTQTPLSLPVTLGEPASISCRSSQSLLHSNGYTYLNWYLQKPGQSPQLLIYRVS
NRASGVPDRFSGSGSGTDFTLKISRVEAEDVGVYYCMQATQTP
>V32RF-AGCE01134598.1-igkv |(8615, 8915)|2.41157422447|(0.820,0.906,0.740)|1
ARCDIQMTQSPSFLSASAGDRVTITCQVSQGISNELPWYQQKPGKAPTLLIFAATRLQSG
IPSQFSGPGSGTDFTLNISSLQPDDFATYYCQQDYSYP
>V33RF-AGCE01134599.1-igkv |(6643, 6943)|2.9121361913|(1.000,0.931,1.000)|1
ARCDIQMTQSPSSLSASVGDRVTITCRASRSISTELDWYQQKPGKAPVLLIYAASSLQTG
VPSRFSGSGSGTDFTLTISSLQPEDVATYYCQQDYSYP
>V34RF-AGCE01134600.1-igkv |(5149, 5453)|2.34106602974|(0.972,0.676,0.990)|1
SSGDIVMTQSPLFLPVTPGKPASISCRSSQSLLYSDGNTYLNWFLQKPGQPPRRLIYKVS
TRDSGVPDRFSGSGSGTDFTLKISQVEAEDVGVYYCMQA
>V35RF-AGCE01134600.1-igkv |(15938, 16236)|2.95135913276|(0.995,0.970,0.989)|1
DIVMTQTPLSLSVTPGKPASIVCRSSQSLFDSEDGNTYLNWYLQKPGQSPQLLIYDASTH
ASGVPDRFSGSGSGTDFTLKISRVEAEDVGVYYCMQA
>V36RF-AGCE01134600.1-igkv |(26942, 27257)|2.99296000066|(0.999,0.996,0.998)|1
SSGDIVMTQTPLSLPVTPGEPASISCRSSQSLLHSDGYTYLDWYLQKPGQSPQLLIYTVS
NRASGVPDRFSGSGSGTDFTLKISRVEAEDVGVYYCMQATQAP
>V37RF-AGCE01134600.1-igkv |(34924, 35224)|2.9949000027|(0.996,1.000,0.999)|1
TRCDIQMTQSPSSLSASVGDKVTITCQASQGINSWLAWYQQKPGKAPRLLIYAASSLQTG
IPSRFSGSGSGTHYTLTISSLQPDDFATYYCQQTYSTP
>V38RF-AGCE01134600.1-igkv |(45692, 45992)|2.99594800078|(0.997,0.999,1.000)|1
ARCDIQMTQSPTFLSASVGDRVTITCQASQSIGSALAWYQQKPGKATRLLIYAASSLQSG
VPSRFSGSGSGTDFTLTISSLQPDDFATYYCQQYSSFP
>V39RF-AGCE01134602.1-igkv |(4964, 5279)|2.979900005|(0.995,0.995,0.990)|1
SSGDIVMTQTPLSLSVTPGEPASISCRSSQSLLHSNGNTYLHWFLQKPGQSPQRLIYRVS
NLASGIPDRFSGSGSGTDFTLKISRVEAEDIGVYYCVQSIQTP
>V40RF-AGCE01134603.1-igkv |(27342, 27657)|2.36021417454|(0.989,0.825,0.792)|1
SSGDTVMTQTPLSLPVTLGEPASISCRSSQSLLHSNGNTYLHWYLQKPGQSPQLLIYKVS
NRASGVSDRFSGSGSGTDFTLKISRVKAEDIGVYYCMQSTWFP
>V41RF-AGCE01134603.1-igkv |(35325, 35640)|2.95972492248|(0.999,0.971,0.993)|1
SSGDIVMTQTPLSLPVTPGEPASISCRSSQSLLYSDGKNYLYWYLQKPGQSPQLLIYLGS
NRASGVPDRFSGSGSGTDFTLKISRVEAEDVGVYYCMQGIELP
>V42RF-AGCE01134604.1-igkv |(11428, 11728)|2.98042016586|(0.998,0.997,0.986)|1
TRCDTQMTQSPSSLSASVGDRVTITCRASQSISNWLAWYQQKPGQVPKLLIYKASTLQSG
VPSRFSGSGSGTDFTLTISSLQPEDVATYYCQKCNSAP
>V43RF-AGCE01134604.1-igkv |(23700, 24015)|2.98783600705|(0.999,0.995,0.994)|1
SSGDIVMTQTPLSLPVTPGEPASISCRSSQSLLHSNGNTYLSWYLQKPGQSPQLLIYKVS
NRASGVPDRFSGSGSGTDFTLKISRVEAEDVGVYYCMQDTKTP
>V44RF-AGCE01134604.1-igkv |(38298, 38611)|2.42753953114|(0.930,0.736,0.904)|1
STGDIVMTQSPLFMPVTLGKPASISCRSSQSLLHSNGNTYLSWFLQKPGQSPRRLIYKVS
TRDSGVPDRFSGSGAGTDFTLKISTVEAEDVGVYYCLQSTRY
>V45RF-AGCE01134608.1-igkv |(4999, 5297)|2.02878872214|(0.980,0.560,0.996)|1
SRGDIVMTQSPAFFSGTPGEKVTITCRASEGISKYLHWYQQKPDQAPKLLIQYASQSISG
VPSRFSGSGSGTDFTLTISSLEVEDAATYYCQQGNKW
>V46RF-AGCE01134609.1-igkv |(1163, 1478)|2.72481547441|(0.987,0.836,0.989)|1
SSGDIVMTQTPLTLPVTLGKPASISCRSSQSLLYSDGKNYLHWYLQKPGQSPQLLIYTAS
NRFSGVPDRFSGSGSGTDFTLKISTVEAEDVGVYYCMQAIKHP
>V47RF-AGCE01134610.1-igkv |(3122, 3422)|2.99398000014|(0.997,0.998,0.999)|1
TRCDIQMTQSPSSLSASVGDKVTITCQASQGISNNLAWYQQKTGKAPRLLINEASSLESG
VPSRFSGSGSGTDFTLTISSLQPEDSATYYCQQHNSYP
>V48RF-AGCE01134612.1-igkv |(802, 1102)|3.0|(1.000,1.000,1.000)|1
ARCDIQMTQSPSSLSASVGDKVTITCQASQGINNYLAWYQQKPGKAPRLLIYYASSLDSG
VPSRFSGSGSGADYTLTISSLQPEDFATYYCQQYNSYP
>V49RF-AGCE01134613.1-igkv |(4841, 5141)|3.0|(1.000,1.000,1.000)|1
ARCDIQMTQSPSSLSASVGDKVTITCQASQGINNYLAWYQQKPGKAPRLLIYYASSLQSG
VPSRFSGSGSGADYTLTISSLQPEDFATYYCQQYSSYP
>V50RF-AGCE01134614.1-igkv |(11222, 11522)|2.99696400065|(1.000,0.997,1.000)|1
ARCDIQMTQSPSSLSASVGDKVTITCQASQGISKWLAWHQQKPGKAPKLLIYEASKLQSG
VPSRFSGSGSGTDFTLTISSLQPEDFATYYCQQYNSNP
>V51RF-AGCE01134616.1-igkv |(2365, 2665)|2.99396800026|(0.998,1.000,0.996)|1
STGQIVMTQSPATLSLSPKETATLSCRASQSVSSYLAWYQQKPGQAPRLLIYGASTRATG
IPDRFSGSGSGTEFTLTISSLEPEDFAVYYCQQYNNRP
>V52RF-AGCE01134616.1-igkv |(22982, 23297)|1.75508237667|(0.982,0.764,0.609)|1
SSGDIVMTQTPLSLPVTRGELASISCRSSQSLLHSNGNTYLWWYLQKPGQSPQPLIYKVS
NRFSGVPERFSGSGSETDFTLKISRVEAEDVGVYYCMQGTQLP
>V53RF-AGCE01134616.1-igkv |(27065, 27365)|3.0|(1.000,1.000,1.000)|1
ARCDIQMTQSPSSLSASVGDTVTITCQASQGISKWLAWYQQKPGKAPKLLIYDASKLQSG
VPSRFSGSGSGTDFTLTISSLQPEDFATYYCQQHNSNP
>V54RF-AGCE01134617.1-igkv |(5600, 5900)|2.94508252471|(0.990,0.999,0.960)|1
TSGQIVMTQSPATLSLSPKETATLSCRASQSVSSYLAWYQQKPGQGPRLLIYGASTRATG
IPARFSGSGSGTEFTLTISSLEPEDFAVYYCKQYNNWP
>V55RF-AGCE01134618.1-igkv |(1458, 1749)|2.1267500118|(0.914,0.593,0.970)|1
IVLTQSPTSMAVSQGERVTISCMASSSVSTSYLHWYQQKPGSPPRLLVYSTSSLASGVPA
RFSGSGSGTSYTLTISSMEADDAASYYCQQGDSFP
>V56RF-AGCE01147749.1-ighv |(15994, 16303)|2.99389600501|(1.000,0.999,0.995)|1
VHSQVQLVQSGAEVKKPGASMKVSCKASGYTFTDYYMNWVRQAPGKGLEWMGDIDPENGE
TSYAQKFQGRVTMTADTSTSTAYMELRSLRSEDTAVYYCAR
>V57RF-AGCE01147750.1-ighv |(13331, 13640)|2.93698468178|(0.991,0.999,0.953)|1
VQCEVQLVESGGGLVQSGWSLRLSCVASGSTFSDYYMHWVCQAPGKGLEWIGQINPNGRS
TYFTDFVKGRFTISRDNAKNSLYLQMNNLKTEDTAVYYCAG
>V58RF-AGCE01147864.1-ighv |(2102, 2409)|2.20042359171|(0.964,0.975,0.627)|1
VCAEVQLVQSGAEVKRPGESLKISCKASGYSFNSYWISWVRQMPGKGLEWMGIIYPGNSD
TRYSPSFQGHVTISADKSTSTAYLQWSSLKASDAAMYYCA
>V59RF-AGCE01147864.1-ighv |(20911, 21220)|3.0|(1.000,1.000,1.000)|1
VQCEVQLVESGGGLVQPGGSLRLSCAASGFTFSSYWMSWVRQAPGKGLEWVSAINTDGSS
TYYADAVKGRFTISRDNAKNSLYLQMNSLRAADTAVYYCAR
>V60RF-AGCE01147865.1-ighv |(13024, 13338)|1.96806000597|(0.797,0.857,0.548)|1
VLSQVTLKESGPAQVKPTQTLTLTCTFSGFSLSTYGMGVSWIRQPPGKALEWLATIYWDD
DKYYSPSLKSRLTISKDTSKNHVVLTMTNMDPVDAATYYCARE
>V61RF-AGCE01147865.1-ighv |(20279, 20594)|2.62887090521|(0.981,0.969,0.801)|1
VQCEVQLVESGGGLVQPGGSLRLSCAASVFTFSDYHMSWVRQAPGKGLEWVGLIRNKANG
GTAEYAESVKDRFTISRDDSENSLYLQMSSLKPEDTAVYYCTR
>V62RF-AGCE01147866.1-ighv |(3708, 4017)|2.7898502378|(0.924,0.921,0.947)|1
AHSQGQLVQSGAEVKKPGASVKVSCKASGYSFTSYVISWVRQNPRQGLEWMGGIYPGNGG
TNYAQKFQGRVTMTTDKSTSTAYMELSSLRSEDMAMYYCAG
>V63RF-AGCE01147870.1-ighv |(6257, 6566)|2.7722422836|(0.882,1.000,0.990)|1
VQCEVQLVESGGGLVQPGGSLRLSCAASGFTFSNYWMSWVRQAPGKGLEWVSYIRYDGGS
TSYADSVKGRFTISRDNAKNSLFLQMNSLRAEDTAMCYCAG
>V64RF-AGCE01147870.1-ighv |(13126, 13438)|2.68881517647|(0.880,0.866,0.996)|1
VQCDVQLAESGGGLVQPGGSLRLSCAASRFTFSSYDMDWVCQAPGKGLQWVSAVSAGGSN
TYYADSVKGRFTISRDNGKKFLYLQMNSLRAEDTAVYYCAKK
>V65RF-AGCE01147874.1-ighv |(2400, 2706)|2.99899600001|(1.000,1.000,0.999)|1
VQCEVQLVESGGGLAKPGGSLRLSCAASGFTFSSYAMSWVRQAPGKALEWVSAIGTGGST
YYADAVKGRFTISRDNAKNSLFLQMNSLRAEDTAVYYCAR
>V66RF-AGCE01147875.1-ighv |(4611, 4920)|2.47793515627|(0.791,0.994,0.986)|1
VQCEVQLVESGGGLVQPRGSLRLSCAASGFTFSSYAMSWVRQAPGKGLEWVSAISTDGSG
TSYADSVKGRFTISRDNAKNSLYLQMNSLRAEDTAVYHCER
>V67RF-AGCE01147944.1-ighv |(862, 1171)|2.99798400013|(1.000,0.998,1.000)|1
VQCEVQLVESGGGLAKPGGSLRLSCAASGFTFSSYYMDWVRQAPGKALEWVSAISTDGSG
TSYADSVKGRFTISRDNAKNSLYLQMSSLRAEDTAVYYCAT
>V68RF-AGCE01147945.1-ighv |(15994, 16303)|2.1276942018|(0.994,0.618,0.954)|1
VHSQVQLVQSGAEVKKPGAPVKVSCKTSGYTFTDYYMHWVRQAPEQGLEWMGRIYPGSGN
TNYAQKFQGRVTMTRDTSTSTAYMELSSLRSEDTAVYYCAR
>V69RF-AGCE01148055.1-ighv |(1634, 1941)|2.08106747101|(0.731,0.629,0.767)|1
VHSQVQMVQSGPELKQPGPSVRVSCKASGYTFNSYAINWVGQVPGQGLEGMGWINTYTGK
PTYAQGFTGRFVFSMDTSISTAYLQISSLKAEDTAVYYCV
>V70RF-AGCE01148057.1-ighv |(4263, 4572)|2.99593600205|(1.000,0.996,1.000)|1
VQCEVQLVESGGGLAKPGGSLRLSCAASGFVFSSYHMHWVRQAPGKGLEWVSFISSDGGS
TYYADSVKGRFTISRDNAKNSLYLQMSSLRAEDTAVYYCAR
>V71RF-AGCE01148067.1-ighv |(2196, 2505)|2.98297652411|(1.000,1.000,0.984)|1
VQSQVQLVQSGAEVKKPGASVKVSCKASGYTFTSYYMNWVRQAPGQGLEWMGWINPYNGN
TGYAQKFQGRVTMTVDKSTSTAYMELSSLRSEDTAVYYCAK
>V72RF-AGCE01148231.1-ighv |(5899, 6208)|1.9807703814|(0.897,0.897,0.557)|1
VCAEVQLMQSGAEVKRPGESLKISCKASGYSFNSYWIGWVRQMPGKGLEWMGMIYPGDSD
TRYSPSFQGHITISADKSTSTAYLQWSSLKASDAAMYYCAR
>V73RF-AGCE01026517.1-trbv |(47851, 48149)|1.51262680928|(0.505,0.736,0.469)|-1
MSAIELVPEHQTVTVSLGDPATLRCSMKGEAITNYYINWYRKTQGNTMTFIYREKDIYGP
GFKDRFQGEIDPEKDQAVLEILAASERDEGSYYCASD
>V74RF-AGCE01026519.1-trav |(24104, 24394)|2.20521382335|(0.708,0.800,0.733)|-1
GTNSNSVKQTDQVIISEGASVTMNCTYTAMGYPTLFWYVQYPNKPLQFLQEETMENSKNF
GARNIKDKNSPIAKHSVQVSDSAMYYCLLRDTVLR
>V75RF-AGCE01026519.1-trav |(29879, 30165)|1.81873386049|(0.567,0.718,0.762)|-1
VSAANNEVQQSPQDLTVQEGEFITINCSYSVGLTSLQWLQQHPGGGIVSLFTLSSEKKKN
GRLTATINLQEKHSSLHITASQPRDSAIYICAV
>V76RF-AGCE01026520.1-trav |(23771, 24058)|1.7881488122|(0.583,0.828,0.868)|-1
ISSQELEQSPQSWIIQEGENLTINCRSSKTLYALYWYKKKYGEGLIFLMMLQKGGEEKSH
EKITAKLDEKKQQSSLHITASQPSHTGIYLCGAD
>V77RF-AGCE01026520.1-trdv |(67373, 67673)|2.89860549808|(0.995,0.989,0.931)|-1
SSMAQTVTQSQPEMSVQEAETVTLNCTYDTSNSNYYLFWYKQPPSRQMILIIRQEGFKQQ
NATENRFSVNFQKAAKSFSLKISDSQLGDTAMYFCAYR
>V78RF-AGCE01026520.1-trdv |(76513, 76813)|2.92849766228|(0.985,0.956,0.991)|-1
FSIAQRVTQSESEMSVQEAETVTLNCTYDSSDSDYYLFWYKQPPSRHMILIIRQEAYKQQ
NATENRFSVNFQKAAKSFSLKISDSQLGDTAMYFCAYR
>V79RF-AGCE01026521.1-trav |(22968, 23292)|2.11770522798|(0.761,0.903,0.614)|-1
VNSQQKNDNQQVKQNTPFLSVQEGELSILNCDYTNNMFDYFLWYKKYPAEGPAILMSISS
VTNQNIDGRFTVFLNKSAKHLSLHIAASQPGDSAVYLCAANAQCSP
>V80RF-AGCE01026522.1-trav |(3924, 4211)|2.53838866514|(0.937,0.951,0.764)|-1
LSGEDQVTQSPEALRLQEGDSSSLNCSYTVGNFGGLLWYRQDPGKGPEFLFILYSAGEEK
QKERLKATLTKKESFLRITAPKPEDSATYLCAVQ
>V81RF-AGCE01026522.1-trav |(15303, 15602)|2.9415016842|(0.983,0.963,0.998)|-1
VSSKQEVTQIPAALSVPEGESLVFNCSFTDSAIYYLQWFRQDPGKGLTSLLLIQSSQREQ
TSGRLNASLDKSSRYSTLHIAASQPGDSATYLCAVRHS
>V82RF-AGCE01026522.1-trav |(67327, 67617)|2.54296739792|(0.857,0.864,0.826)|-1
TIIDAKTTQPTSMDCAEGRAANLPCNHSTISGNEYIHWYRQSYSQEPQYVIHGLKNNETN
EMASLIIAEDRKSSILILPHATLRDTAVYYCIVRV
>V83RF-AGCE01026522.1-trav |(73912, 74209)|2.0263947504|(0.826,0.569,0.872)|-1
GTRAQSVTQLDGHITVSEGAPLKLRCNYSYSTTPYLFWYVQYPSQSLQLLLKDLTGATQV
KGIKGFEAEFRKSETSFHLRKPSAHVSDTAVYFCAAS
>V84RF-AGCE01026527.1-trav |(1820, 2116)|2.94226014987|(0.980,0.991,0.972)|-1
VNSQQGEEEPQTLSIQEGENAIINCSYKTSITSLQWYRQDSNRGLTQLILIRSNEREKHS
GRLRFMLDTSMKSSSLFIAAAQAADTAAYFCATEAQC
>V85RF-AGCE01026527.1-trav |(7054, 7345)|2.97097652411|(0.996,0.996,0.980)|-1
RTYGDSVTQTEGPVTLPEGAALTLNCTYQSSYSVFLFWYVQYLDKEPQLLLKSSENQETD
SRGFQASHVKSDSSFRLEKPSVQLSDSAVYYCALR
>V86RF-AGCE01026527.1-trdv |(10273, 10576)|2.97858408012|(0.989,0.999,0.991)|-1
SSMAQKVTQAQTEISVVEKEDVTLDCVYETSDTTYYLYWYKQPSAREMIFLIRQNSFNEQ
NEISGRYSGNFQKSTSSFSLTIAASQVIDSAVYFCALSE
>V87RF-AGCE01026529.1-trav |(3178, 3469)|2.95806587284|(0.994,0.972,0.994)|-1
VWSQQKEVEQNPGSLSVPEGAIASLSCTYSNRAFQYFMWYRQYSRKGPELLTFIYSSDKK
EDGRFTAQLNKSSQYISLFIRDSQPSDSATYLCAM
>V88RF-AGCE01026530.1-trbv |(4836, 5154)|1.5783986342|(0.601,0.583,0.466)|-1
QSVTQLDGQVTVSEGAPVLLKCNYSSSVSAVYLFWYVQYPNQGLHFLLKYVSGPTLVKGI
KGFEAEIKKSESSFHLKKSSVHVSDAAEYFCAVSDTVPETAGEL
>V89RF-AGCE01026530.1-trav |(8602, 8899)|2.96351211712|(0.992,0.991,0.981)|-1
DARAQSVTQPDIHITVSEGASLELRCNYSYGATPYLFWYVQSPGQGLQLLLRYFSGDTLV
QGIKGFEAEFKRSQSSFNLRKPSVHWSDAAEYFCAVS
>V90RF-AGCE01026530.1-trav |(21106, 21396)|2.93200449196|(0.964,0.982,0.990)|-1
VNGENVEQHPSTLSVQVGDSSVINCTYSDSASNYFPWYKQELGKGPRLIIDIRSNVDKRK
DGRMTVLLNKAAKHFSLHITDTQPGDSALYFCAAG
>V91RF-AGCE01026530.1-trav |(40762, 41065)|2.97578801933|(0.995,0.988,0.993)|-1
VWSQQKVEQNSGPLNVPEGVIASLNCTYSDRGSQSFYWYRQYPGKSPELLMSVYSSGNED
GRFTAQLNRASQYVSLLIRDSQLSDSATYLCAVSTRCSP
>V92RF-AGCE01026530.1-trbv |(45429, 45753)|1.70915499793|(0.574,0.649,0.520)|-1
TRAQSVTQLDGQVTVSEGAPVLLKCNYSSSVTVYPFWYVQYPNQGLHFLLKYVSGPTLVK
GIKGFQAEIKKSENSFHLKKSSAHVSDAAEYFCAVSDTVPETAGEL
>V93RF-AGCE01026531.1-trav |(478, 766)|2.98480001921|(0.993,0.992,1.000)|-1
VWSQQKEVEQDPGPFNVPEGTTVAFNCTYSNSASQYFFWYRQDPRKGPKLLMSVYSSGNE
DGRFTAQLNRASQYVSLLIRDSQLSDSATYLCAV
>V94RF-AGCE01026534.1-trav |(4915, 5231)|2.02870162681|(0.933,0.868,0.601)|-1
QSVAQPEDRVTVAEGNPLTVKCTYSVSGTPYLFWYVQYPNQGLQFLLKYITGDNLVKGSC
GFEAEFNKSQTSFHLKKPSALVSDSASYFCAVRDTVMGAAGGA
>V95RF-AGCE01026534.1-trav |(23755, 24045)|2.9834040992|(0.989,0.999,0.996)|-1
MSSGEDVEQSRFLSVQEGDSVVMNCTYTDSSSSYLYWYKQEPGASLQLLAYILSNTDMKQ
DQRLTVQLDKKNKHLSLHVAEAQTGDSAIYFCAES
>V96RF-AGCE01026534.1-trav |(44840, 45134)|2.91252655653|(0.948,0.992,0.986)|-1
GISGDSVVQTEGEVLLSEGDSLTVNCSYESTGYPSLFWYVQYPGKGPELLLKATKGNDKG
SNKDFEAIYRTETTSFHLEKGSVRESDSAVYFCALS
>V97RF-AGCE01026534.1-trav |(47482, 47775)|2.601110808|(0.825,0.956,0.928)|-1
GSGKNQVEQSPQSLVILEGKNCTLQCNYTVTPFNNLRWYKQNAGKGPITLMFMTFSENTK
SNGRYTATLDANTKQSSLYITASQLSDSASFICVVS
>V98RF-AGCE01026535.1-trav |(1387, 1680)|1.57471550424|(0.595,0.480,0.557)|-1
AESKDQVSQPSTVASSEGAVAEIFCNHSVSNAYDFFWYLHFPGRAPRLLVKGSRPSQQGR
YNMTYERFSSSLLILQVQEADAAVYYCAVEGTEAGN
>V99RF-AGCE01112644.1-igkv |(18051, 18342)|2.05954092458|(0.780,0.812,0.597)|-1
SVASYELTQPRSVSVSPGQTASITCSGDKLGDKYAYWYQQKPGQAPVLVIYQDSKRPSGI
PERFSGSNSGNTATLTISGTQAVDEADYYCQVPHS
>V100RF-AGCE01112648.1-iglv |(492, 795)|2.98594800078|(0.997,0.995,0.994)|-1
FVTSYELTQPHSVSVAPGQTARITCGGNNIGGKYTYWYQQKSGQSPVLVIYRDNNRPSGI
PERFSGSNSGNTATLTISGVQAGDEADYYCQVWDSSSNH
>V101RF-AGCE01112648.1-iglv |(8719, 9022)|2.98974003277|(0.999,0.991,1.000)|-1
SVVSSAMTQEPAVSVALGQTARITCQGGGIGTYSANWYQQKPGQAPVLVIYDNNNRPSGI
PDRFSGSSSGNTASLTITGAQVEDEADYYCGSWDSSGTH
>V102RF-AGCE01112652.1-iglv |(287, 590)|2.54425337589|(0.964,0.760,0.974)|-1
SATSYELTQPHSVSVAPGQTARITCGGNNIGRKNVHWYQQKSGQAPVLVIYNDNNRPSGI
PERFSGSNSGNTATLTISGVQAGDEADYYCQVWDSSTDH
>V103RF-AGCE01112674.1-iglv |(4938, 5247)|2.96549264122|(0.998,0.982,0.987)|-1
SWAQSVLTQPPSASGAPGQRVTISCSGSSSNIGNNYANWYQQLPGKAPKLLIYGNSNRPS
GSPDRFSGSKSDTSATLAITGLQSADEADYYCETWDSSLNA
>V104RF-AGCE01112675.1-iglv |(2837, 3138)|1.95917923843|(0.829,0.832,0.556)|-1
SLSQPVLTQPPSTSASLGASVTLTCTLSSGYSNYAVDWYQQRPDKGPRFVMRVGTSGIVG
SKGDGIPDRFSVSGSGLNRYLTIKNIQEEDESDYYCGS
>V105RF-AGCE01134619.1-igkv |(15805, 16120)|1.8803108523|(0.916,0.622,0.745)|-1
AYGDIVMTQSPDSLAVSLGERVTVNCKSSQSLLYFNNKNYLAWYQQKPGQDPKLLISWAS
SRPAEVPDQFSGSGSGTDFTLTINSLQAEDVGLYYCQQYYSFP
>V106RF-AGCE01134619.1-igkv |(32675, 32987)|2.96232022844|(0.983,0.984,0.996)|-1
TYGDIVMTQSPGSLAVSLGERVTINCKSSQSLLSSSKNYLAWHQQKPGQAPKQIIVWAST
RVSGVPDRYSGSGSGTDFTLTISSLQAEDVAVYYCQQFYSAP
>V107RF-AGCE01134619.1-igkv |(44281, 44572)|2.28678929256|(0.724,0.862,0.793)|-1
NTVLTQSPALLSASLRDTIFMSCSANQSISDYLTWYQQKPGQPPKILVYDADNLYSGVSS
RFSGIQSGTNFILTISSVEADDAATYYCQQDYAIP
>V108RF-AGCE01134619.1-igkv |(59305, 59593)|2.36097750543|(0.807,0.737,0.841)|-1
TTLTQSPTLVSVTPGDKVTISCKASQDIDNDIYWYQQKPGEAPIFIIQEATTLVSGIPPR
FSGSGYGTDFTLTINNIELEDAAYYFCQQDDNFP
>V109RF-AGCE01135277.1-iglv |(31, 340)|2.98174003277|(0.991,0.999,0.992)|-1
CWAQSVLTQPPSVSGNPGQRVTISCSGSSSNIGSSYVNWYQQLPGTAPKLLIYDSNQRPS
GVSDQFSGSTSGNSASLTITGLQSADEADYYCQSYDSNLKA
>V110RF-AGCE01135286.1-iglv |(6543, 6850)|2.0734559642|(0.804,0.873,0.587)|-1
SNSQAVVTQEPSLTVSPGGTVTLTCASSTGTVTSSNYPCWIQQKPGQAPRTLIYNTNSKY
SWTPARFSGSLLGGKAALTLSGAQPEDEAEYYCLLYYSGA
>V111RF-AGCE01147916.1-ighv |(5261, 5570)|2.53625941136|(0.936,0.913,0.781)|-1
AHSQMQLVQSEAEVKKPGASVKVSCKASGYTFTYHYMHWVRQAPGQGLEWMGWIMPYNGN
TNYAQKVEGRVTITRDTSMSTIYMELRSLRSEDTAVYYCAR
>V112RF-AGCE01147919.1-ighv |(4216, 4525)|2.99899600001|(1.000,1.000,0.999)|-1
AHSQVQLVQSGAEVKKPGASVKISCKASGYTFTSYSMHWVQQAPGQGLEWIGYINTNTGG
TNYAQKFQGRVTMTRDTSTSTAYMELSSLKSEDTAVYYCAR
>V113RF-AGCE01147923.1-ighv |(7327, 7634)|2.99496800026|(0.997,0.999,0.999)|-1
VLSQVQLQESGPGLVKPSDTLSLTCAVSGYSISSGYWWSWIRQPPGKALEWIGSIYYSGS
AYYNPSLKSRVTISTDMSKNQFSLRMSSVTAADTAVYYCA
>V114RF-AGCE01147939.1-iglv |(7498, 7807)|2.95260484445|(0.989,0.994,0.971)|-1
VDSETVVTQEPSYLVSPGGTVTLTCGLSSGSVSTSHYPSWYQQTPGQAPQMLIYSTNTRP
SGVPDRFSGSILGNKAALTIKGAQADDETDYYCMLYMGSGI
>V115RF-AGCE01148076.1-ighv |(262, 572)|2.60151093654|(0.825,0.968,0.931)|-1
LSKVQVQLQQWGPGLVKPSETLSLTCAVYGYFISSDYWWSWIRQPPGKGLEWIGRISYIG
STYYNPSLKSRVTLSTDTSKSQFSLRLSSVTTADTVVYYCA
>V116RF-AGCE01148081.1-ighv |(431, 740)|2.60654506828|(0.992,0.792,0.972)|-1
VQSQVQLVQSGAEVKKPGASVKVSCKTSGYTFTNYYMYWVRQAPGQGLEWMGWIYPGNGN
TKYAQNFQGRVTMTADKSTSTAYMELSSLRSEDTTVYYCAR
>V117RF-AGCE01148188.1-ighv |(110, 419)|2.99080001921|(0.999,0.992,1.000)|-1
VQCEVQLVESGGGLAKPGGSLRLSCAASGFTFSDYWMGWVRQAPWKGLEWVGEINHNGGS
TYYADSVKGRFTISRDNAKNSLYLQMNSLRAEDTAVYYCAR
>V118RF-AGCE01148199.1-ighv |(2012, 2325)|2.99288400513|(1.000,0.998,0.995)|-1
VQCEVQLVESGGGLAQPGGSLRLSCAASGFTFSNYWMNWVCQAPGKGLEWVGRIKSKADG
GTAEYTASVKGRFTISRDDSKNMLYLQMRSLKTEDTAVYYCA
>V119RF-AGCE01148346.1-igkv |(2421, 2731)|2.05619386655|(0.647,0.717,0.776)|-1
SLSQPVLTQSPSASAALGASVKLTCTLSSGHSNYAIAWHQQQPGKAPRYVMKLTGDGSYN
KGDGIPDRFSGSSSGADRYLTISNLRSEDEADYYCQTWDTG
>V120RF-AGCE01148386.1-ighv |(210, 517)|2.99899600001|(1.000,1.000,0.999)|-1
VQCEVQLVESGGGLVKPGGSLRLSCAASGFTLSEYGMHWVRQAPGKGLEWVSFISYNGGY
IHYADSVKGRFTISRDNAKNSLYLQMSSLRAEDTAVYYCA
>V0RF-ADFV01062069.1-trbv |(9529, 9829)|2.5327411848|(0.941,0.859,0.818)|1
LTEPEVTQTPSHQVTQMGQEVILRCVPISNHLYFYWYRQILGQKFEFLVSFYSDKVSDKS
EIFDEQFSVERPDGSNFTLKIRSTKLEDSAMYFCASSE
>V1RF-ADFV01062069.1-trbv |(21787, 22100)|2.9136312831|(0.988,0.988,0.945)|1
PIDTEVTQTPKHLVMGISNKKSLKCEQHMGHRAMYWYKQKAKKPPELMFVYSYEKLSINE
SVPSRFSPECPKSSLLNLHLHALQPEDSALYLCASSQDTALQ
>V2RF-ADFV01062069.1-trbv |(29967, 30258)|2.4789167015|(0.838,0.800,0.847)|1
PEVTQTPSHQVTQMGQEVILQCVPISNHLRFYWYRQILGQKIEFLLYFFDGKISEKSEIV
DDRFSAARPDGSPFTLKIQSTKLEDSATYFCASSE
>V3RF-ADFV01062069.1-trbv |(35848, 36139)|2.42478420374|(0.846,0.763,0.843)|1
PEVTQTPSHQVTQMGQEVILQCVPISNHLHFYWYRQIMGQKIEFLLYFFNGKISEKSEIV
DDRFSAARPDGSPFTLKIQSTKLEDSATYFCASSE
>V4RF-ADFV01062069.1-trbv |(42333, 42630)|2.98580001921|(0.998,0.997,0.991)|1
SLDTAVSQTPKYLVTQMGNDKSLKCEQNLGHDTMYWYKQDSKKFLKIMFSYRNKEPILNE
TVPNRFSPDSPDKAHLNLHIKSLELGDSAVYFCASSQ
>V5RF-ADFV01062069.1-trbv |(46363, 46676)|2.9540773318|(0.995,0.975,0.986)|1
PIDTEVTQTPKHLVMGMTNKKSLECEQHMGHNAMYWYKQKAKKPPELMFVYNYEKLSINE
SVPSRFSPECPKSSLLNLHLHALQPEDSALYLCASSQDTALQ
>V6RF-ADFV01062069.1-trbv |(54249, 54545)|2.95977645736|(0.989,0.974,0.998)|1
PVEAGVTQTPRYLIKTRGQQVTLSCSPISGHQSVFWYQQTPGQGLQFLFEYFSETQREKG
NFPDRFSGRQFSNSRSEMNVSTLELGDSALYLCASSL
>V7RF-ADFV01062069.1-trbv |(61551, 61848)|3.0|(1.000,1.000,1.000)|1
PVNAGVTQTPKFQVLKTGQSMTLQCAQDMNHNSMYWYRQDPGMGLRLIHYSVGEGTTDKG
EVPDGYNVSRLNTQDFSLRLESAAPSQTSVYFCASSE
>V8RF-ADFV01062071.1-trbv |(8280, 8577)|2.99696400065|(1.000,1.000,0.997)|1
PVNAGVTQTPKFQVLKTGQSMTLQCAQDMNHNSMYWYRQDPGMGLRLIHYSAVEGITDKG
EVSDGYNVSRLNKQNLLLRLVSAAPSQTSVYFCASSE
>V9RF-ADFV01062071.1-trbv |(16301, 16614)|2.96102906788|(0.998,0.980,0.985)|1
PLDTAVLQTPKYLVTQTGKKESLKCEQNLGHNAMYWYKQDSKKFLKIMFSYSNKEPILNE
TVPNRFSPESPDKSHLNLHISSLELGDSAVYFCASSQDTALQ
>V10RF-ADFV01062071.1-trbv |(19707, 20020)|2.59882742436|(0.974,0.926,0.810)|1
PMETGVTQTPRHLVMGMTNKKSLKCEQDLGHNAMYWYKQSAEKPLQLMFVYNLKEQIENN
SVPSRFSPECPNSSHLFLHLHALQPEDSVLYLCASSQDTALQ
>V11RF-ADFV01062071.1-trbv |(27836, 28133)|2.99899600001|(1.000,1.000,0.999)|1
PVNAGVTQTPKFQVLKTGQSMTLQCAQDMNHNYMYWYRQDPGMGLRLIHYSTGEGTTDKG
EVSDGYDVSRSNTQNFLLRLESAAPSQTSVYFCASSE
>V12RF-ADFV01062073.1-trbv |(25101, 25398)|2.10709890194|(0.865,0.689,0.735)|1
PVMAGITQAPRSQILAVGRSMTLRCTQDMRHNAMYWYRQDLGLGLRLMHYSNTVGTTGKG
EVPDGYSVSRANTDDSPLTLASAVPSRTSVYFCASSD
>V13RF-ADFV01062075.1-trbv |(644, 934)|2.68014518058|(0.983,0.824,0.970)|1
DSGVTQTPKHLITAIGQRVTLRCSPRSGDLSVYWYQQSLDQGLQFLIQYYNGEERERGNI
LERFSAQQFPDLHSELNLSSLELGDSALYFCASSI
>V14RF-ADFV01062075.1-trbv |(8445, 8742)|2.2194691592|(0.901,0.629,0.959)|1
HRDAEITQSPRYKITETGRQVTLKCHQTWNHNNMFWYRQDLGHGLRLIHYSFGVPDTGKG
EVSDGYSVSRSKTEDFPLTLESAASSQTSVYFCASSE
>V15RF-ADFV01062075.1-trbv |(33395, 33695)|2.99798400013|(1.000,1.000,0.998)|1
HTGAGVSQSPRYKVTKKGQDVALRCDPISGHVSLYWYRQTLRQGPEFLTYFNYEAQQDKS
GLLSGRFSAERPEGSVSTLKIQRTEQGDTAVYLCASSL
>V16RF-ADFV01062075.1-trbv |(40699, 40989)|2.97799200002|(0.992,0.993,0.993)|1
ETGVTQSPTHLIKTRGQQVTLRCSPMSGHTSVYWYQQVLGQGLQFLLWYNEEAERERGNF
PRRFSGRQFPNYSSELNVNASLLEDSALYLCASSL
>V17RF-ADFV01062075.1-trbv |(60057, 60353)|2.98660004313|(0.991,0.997,0.999)|1
SVETGVTQSPTHLIKTRGQQVTLRCSPQSGHNTVSWYQQTLGQGPQFIVQYYREEENGRG
NFPPRFSGRQFPDYSSELNVNASLLEDSALYLCASSL
>V18RF-ADFV01062075.1-trbv |(69334, 69634)|2.9505766041|(0.986,0.996,0.970)|1
HADTGVSQDPRHKITKRGRNVTFRCDPISEHNSLYWYQRTLGQGPEFLTDFQNEAQLDKS
GLLSDHFSAERPKGSFSTLKIQRTEQGDSAMYLCASSL
>V19RF-ADFV01062075.1-trbv |(75853, 76150)|2.60493208044|(0.971,0.806,0.936)|1
SVAAGVIQSPRHLVKEKRETATLKCYPIPGHDTVYWYQQGPGQGPQFLISFYEKMQNDKG
SIPDRFSAQQFSDYHSELNMSSLELGDSALYLCASSL
>V20RF-ADFV01062075.1-trbv |(83965, 84262)|2.96413755993|(0.994,0.999,0.973)|1
HMDAGITQSPRHKVTETGTPVTLRCHQTENHCYMYWYRQDLGHGLRLIHYSYGVKDTDKG
EVSDGYSVSRSNTEDFLLTLGSATHSQTSVYFCAISE
>V21RF-ADFV01062075.1-trbv |(95774, 96074)|2.99294800078|(0.998,0.995,1.000)|1
LIEAGVVQSPRYKIIEKKQPVAFWCNPISGHNTLYWYRQNLGQGPELLIRYENEEAVDDS
QLPKDRFSAERLKGVDSTLKIQPAELGDSAVYLCASSL
>V22RF-ADFV01062076.1-trbv |(7831, 8127)|2.99193200206|(0.999,0.998,0.995)|1
PVDAGVTQSPTHLIKMRGQQVTLRCSPISGHTSVYWYQQALGQGPQFIIQYYEEEERGRG
NFPDRFSARQFPNYSSELNVNALLLGDSALYLCASSL
>V23RF-ADFV01062078.1-trbv |(10230, 10521)|2.62870219996|(0.971,0.919,0.828)|1
AGVTQFPSHRVIEKGQTVTLRCDPIPGHDYLYWYRRVMGKEIKFLICFLKESIQDESGMP
NNRFSAKSTGGTYSTLTVQPAELEDSGVYFCASSQ
>V24RF-ADFV01062079.1-trbv |(3580, 3877)|2.49067786389|(0.950,0.910,0.765)|1
HGDGMVIQNPRYQVTQLGKPVTLSCSQNLNHNVMYWYQQKSSQAPKLLFHYYDKDFNNEA
DTPDNFQSRRPNTSFCFLDIRSPGLGDAAVYLCATSR
>V25RF-ADFV01062079.1-trbv |(8562, 8862)|2.98196400065|(0.993,0.996,0.993)|1
SPGEEVTQTPKHLVKGEGQKAKLYCAPIKGHSYVFWYQQVLKKEFKFLISFQNENIFDET
GMPKERFSAKCLLNSPRSLEIQATKLKDSAVYFCASSQ
>V26RF-ADFV01062081.1-trbv |(16583, 16883)|2.5513715962|(0.961,0.801,0.901)|1
SMDTKVTQRPRLLVKANEQKAKMDCVPIKGHSYVYWYRKKLEEELKFLVYLQNEEIIQKA
EIINERFSAQCPKNSSCTLEIQSTESGDTALYFCASSK
>V27RF-ADFV01062081.1-trbv |(35693, 36012)|2.24337702591|(0.846,0.746,0.737)|1
SVLFPTRSVDADTTQIPRNRIAKTGKTIMLECSQTKGHDRMYWYRQDPGLGLRLIYYSFD
VKDINKGEISDGYRVSRQTQANFSLSLEFATPNQTALYFCATSD
>V28RF-ADFV01062082.1-trbv |(9024, 9321)|2.99185201038|(0.999,0.993,1.000)|1
LMEADIYQTPRYLVIRTGKKITLECSQTMGHDKMYWYQQDPGMELHLIHYSYGVNSTEKG
DLSSESTVSRIRTEHFPLTLESARPSHTSQYLCASSE
>V29RF-ADFV01062084.1-trbv |(20830, 21127)|2.9803601679|(0.999,0.987,0.995)|1
LLEAQVTQNPRYLITVTGKKLTVTCSQNMNHEYMSWYRQDPGLGLRQIYYSINVEAVDKG
DVPEGYNVSRKEKRNFPLILESPSPNQTSLYFCASSL
>V30RF-ADFV01062084.1-trbv |(25535, 25832)|2.98774003277|(0.999,0.991,0.998)|1
LVDVKVTQSSRYLVKRMGEKVFLECVQDMDHERMFWYRQDPGLGLRLIYFSYDVQMKEKG
DIPEGYSVSREKKEHFSLILESASTNQTSMYLCASSL
>V31RF-ADFV01062085.1-trbv |(301, 604)|2.47578719564|(0.906,0.900,0.756)|1
SVFSAVVSQKPSRDICQRGTSLTIQCQVNSQVTMMFWYRQQPGQSLTMIATANQGSEATY
ESGFVIDKFPISCPNLSFSTLTVSNMSPEDSSIYLCSVE
>V32RF-ADFV01106193.1-igkv |(6403, 6701)|2.55021331374|(0.814,0.874,0.975)|1
SRGEIVLTQSPAFLSVTPKEKVTITCRASQSIGSSLHWYQQKPDQSPKLLVKYASQSISG
VPSRFSGSGSGTDFTLTINSLEAEDVATYHCQQSSSL
>V33RF-ADFV01106193.1-igkv |(26068, 26361)|2.99599600001|(0.999,0.998,0.999)|1
TTREIVLTQSPATLSLSPGEKATLSCRASQSVGSNLAWYQQKPGQAPRLLIYGATNRATG
IPDRFSGSGSGTDFTLTISSLEPEDFAVYYCQKYGS
>V34RF-ADFV01106193.1-igkv |(39460, 39760)|2.26902774875|(0.965,1.000,0.645)|1
VRCDIQMTQSPSSLSASVGDRVTITCRASQSISNDLTWYQQKPGKAPTLLIYDATNLHTG
VPSRFSGGGSGADYSLTISSLQLEDFATYYCQQEYSYP
>V35RF-ADFV01106193.1-igkv |(55018, 55315)|1.69878929613|(0.646,0.514,0.611)|1
SRADIVMTQSPAFLSATPGEKVTVTCRASQSTGSSLRWYQQKPDQSPKLLVKYASQSISG
VPSRFSGSGSGTDFALTISSLKLKMLQLITVSRAVST
>V36RF-ADFV01106193.1-igkv |(68380, 68680)|2.99899600001|(1.000,1.000,0.999)|1
SRCDIQMTQSPSSLSASVGDRVTITCRASQGISNYLNWYQQKPGKAPKLLIYDASSLQSG
VPSRFSGSGSGTEFTLTISSLQPEDFAAYYCQQYKSYP
>V37RF-ADFV01106193.1-igkv |(80547, 80847)|2.99598400013|(0.998,0.998,1.000)|1
TTGEIVLTQSPATLSLSTRERATISCTASQSVSSYLAWYQQKPGQAPRLLIYYASSRATG
IPDRFSGSGSGTDFTLTISSLEPEDFAVYYCQQYKSFS
>V38RF-ADFV01106195.1-igkv |(6885, 7185)|2.99899600001|(1.000,0.999,1.000)|1
SRCDIQMTQSPSSLSASVGDRVTITCRASQGISSYLAWYQQKPGKAPELLIYAASTLQSG
VPSRFSGSGSGTEFTLTISSLQPEDFATYYCQQYNSYP
>V39RF-ADFV01106195.1-igkv |(45397, 45697)|3.0|(1.000,1.000,1.000)|1
ARCDIQMTQSPSSLSASVGDRVTITCRASQGISKWLAWYQQKPGKAPKPLIYDASSLQSG
VPSRFSGSGSGTEFTLTISSLQPEDFATYYCQQYNSYP
>V40RF-ADFV01106195.1-igkv |(64645, 64945)|2.99899600001|(1.000,0.999,1.000)|1
ARCDIQMTQSPTSLSASVGDRVTITCRASQGISSWLAWYQQKPGKAPKLLIYKASSLESG
VPSRFSGSGSGTEFTLTISSLQPEDFATYYCQQYNSDP
>V41RF-ADFV01106195.1-igkv |(72488, 72803)|2.14397750543|(0.688,0.758,0.722)|1
CNGDIVLTQSPVSLAVSPGRMATITCRASESVSVLGMTNLIDWCQQKPGQPPKLLIYQAS
NKDTGVPARFSGSGSGTDFTLTINPVEADDAANDYCLQSKNFP
>V42RF-ADFV01126738.1-iglv |(7858, 8168)|2.96602424945|(1.000,0.973,0.996)|1
SLSQSVVTQPASLSASPGASARLTCTLRSGINVGSYRISWYQQKPGSPPQYLLNYYSDSD
KGQGSGVPSRFSGSKDASTNAGISLISGLQSEDEADYYCMI
>V43RF-ADFV01126738.1-iglv |(12674, 12983)|2.99899600001|(1.000,1.000,0.999)|1
SWAQSVLTQPSSVSGTPGQRVTISCSGSSSNIGSNNVYWYQQLPGTAPKLLIYDNNQRPS
GVPDRFSGSKSGTSASLAISGLQTEDEADYYCEAWDDSLSG
>V44RF-ADFV01126740.1-iglv |(9361, 9671)|2.17275256931|(0.966,0.614,0.985)|1
SLSQPVLTQPSSLSASPGASARLTCTFSGGIIVGGYHIFWYQQKPGSPPRYLLRYKSDSD
KHQGSGVPSRFSGSKDASANAGILLISGLQSEDEADYYCMI
>V45RF-ADFV01126741.1-iglv |(7037, 7346)|2.63670067828|(0.887,0.881,0.870)|1
SWAQSALTQPPSVSAAPGQKVTISCSGSRSDIGNYAVSWYQQLPGTAPKLLIYENNKRPS
GISDRFSGSKSGTSASLGVTGLQTGDEANYYCLAWDSSLSA
>V46RF-ADFV01126741.1-iglv |(12573, 12885)|2.5266218921|(0.993,0.750,0.994)|1
SWAQSVLTQPPSVSGSPGQRVTIFCTGSSSNIGEGYYVHWYQQLPGTAPKLLIYENNKRP
SGISDRFSGSKSGTSASLAIAGLQTGDEADYYCQSYDSSLSA
>V47RF-ADFV01126742.1-iglv |(25243, 25552)|2.98230822856|(0.998,1.000,0.985)|1
SWAQSVLTQPPSVSGTPGQRVTISCSGSSSNIGSNNVYWYQQLPGTAPKLLIYYNNQRPS
GVPDRFSGSKSGTLASLAITGLRSEDEADYYCEAWDDSLSG
>V48RF-ADFV01126755.1-iglv |(18501, 18804)|2.60107019773|(0.937,0.781,0.985)|1
SVASYELAQPSSVSVSPGQTARITCSGDVLAKKYAQWFQQKTGQSPVLLIYKDSERPSGI
PERFSGSSSGTTVTLTISGAQAEDEADYYCQSADSSGNH
>V49RF-ADFV01126756.1-iglv |(8462, 8772)|2.99294800078|(0.998,0.995,1.000)|1
SWAQSALTQPRSVSGSPGQSVTISCTGTSSDVGGYNYVSWYQQHPGTAPKLMIYDVSKRP
SGVSDRFSGSKSGNTASLTISGLQAEDEADYYCCSYASDDT
>V50RF-ADFV01126759.1-iglv |(52, 349)|2.59933001049|(0.897,0.844,0.872)|1
SVASYELIQPPSVSVSPGQTARITCSGDVLGENYADWYQQKPGQAPVLVIYKDSERPPGI
PERFSGCTSGNTATLTISRVLTEEEADYYCLSGDEDN
>V51RF-ADFV01126759.1-iglv |(7253, 7556)|2.99698000014|(1.000,0.998,0.999)|1
SATSYELTQPPSVSVAPGQTAKITCGGNNIGSKNVYWYQQKPGQAPVLVIYRDSNRPSGI
PERFSGSNSGNTATLTISAVEAGDEADYYCQVWDSTSDH
>V52RF-ADFV01126759.1-iglv |(16005, 16316)|2.69129021796|(0.975,0.822,0.984)|1
SVTSYELTQPRPVSVAPGQTARITCGGNDIGNKYVYWYQQKPGQAPVLVIYEDSNRPSGI
PERFSGSNSGNTATLTISAVEAGDEADYYCQVWDSSSKHDTV
>V53RF-ADFV01126760.1-iglv |(18689, 18992)|2.99192000218|(0.998,0.994,1.000)|1
SVASYELTQPPSVSVSPGQTAKITCSGDALPKKYAYWYQQKSGQTPVLIIYEDSKRPSGI
PERFSGSSSGTMATLTISGTQVEDEADYYCYSADSSGNH
>V54RF-ADFV01126760.1-iglv |(26179, 26490)|2.31498160652|(0.795,0.704,0.872)|1
SVASYELTQPLSVSVAPGQTARITCGGNNIGSKAVQWHQQKPGQAPVPVIYGNSNRPSGI
PERFSGSNSGNTATLIISGAQAGDEADYYCQVWDSSSKHHTV
>V55RF-ADFV01136575.1-ighv |(24647, 24950)|1.68916019939|(0.528,0.590,0.619)|1
KQWICVALSDQAVSVFAGVQCEVQLVESGGGLVQPGGSLRLSYAASGFTFSSSAMHWVRQ
ASGKGLEWVGYIRSKANSYTTAYAASVQGRFTISRDDSK
>V56RF-ADFV01136793.1-ighv |(1288, 1597)|2.34837485352|(0.831,0.799,0.749)|1
AHSKVQLVQSGTEVKKPGASVKVSCQDSGYTLTDYSKHWVRQTPGKGLQWMGGFDPVDGE
TVNSQKFQRRVTMTEDTSTDTAYMELSSLRSEDTAVYYCAT
>V57RF-ADFV01136793.1-ighv |(10260, 10566)|3.0|(1.000,1.000,1.000)|1
VQCEVQLVESGGGLVQPGGSLRLSCVASGFTFSSYDMSWVRQAPGKGLEWVSYISSGGST
YYPDSVKGRFTISRDNAKNTLYLQMNSLRAEDTAVYYCAK
>V58RF-ADFV01138112.1-igkv |(5360, 5660)|3.0|(1.000,1.000,1.000)|1
ARCDIQMTQSPSSLSASVGDKVTITCRASQGISNDLNWYQQKPGKAPKLLIYYASSLQSG
IPSRFSGSGSGTTYTLTISSLQPEDFATYYCQQGYSTP
>V59RF-ADFV01192032.1-trav |(8211, 8514)|1.74643400474|(0.911,0.834,0.506)|1
MYLVLGTTGQNIDQPTEMTATEGAIVQINCTYQTSGFNGLFWYQQHDGEAPTFLSYNVLD
GLEEKGHFSSFLSRSKGYSYLLLKKLQMKDSASYLCAVR
>V60RF-ADFV01192035.1-trav |(8555, 8856)|2.96595641525|(0.996,0.981,0.990)|1
GLRAQLVAQPEDQVTVAEGNPLTVKCTYSVSGNPYLFWYVQYPNQGLQFLLKYIAGDNLV
KGSYGFEAEFNKSQTSFYLKKPSALVSDSALYFCAVRD
>V61RF-ADFV01192035.1-trav |(53089, 53379)|2.99294800078|(0.996,0.999,0.998)|1
MNRGEDVEQSLFLGVREGDSSVINCTYTDSSSTYLYWYKQEPGAGLQLLTYIFSNMDLKQ
DQRLTVLLNKKDKHLSLRIADTQTGDSAIYFCAES
>V62RF-ADFV01192035.1-trav |(63802, 64090)|2.98694800078|(0.996,0.993,0.998)|1
VKSQKIEQNSEALNIQEGKTATLTCNYTNYSPAYLLWYRQDPGRGPVFLLLIRENEKEKR
KERLKVTFDTTLKQSLFHITASQPADSATYLCAL
>V63RF-ADFV01192035.1-trav |(73447, 73734)|2.95774192532|(0.991,0.969,1.000)|1
ANGEKQVEHSPHFLGSQQGDVASVSCMYSVSRFNNLQWYRQNTGMGPKHLLSMYSAGYEK
QKGRLNATLLKNGSSLYITAVQPEDSATYFCAVD
>V64RF-ADFV01192035.1-trav |(102005, 102299)|2.97870083945|(0.999,1.000,0.981)|1
GINGDSVVQTEGQVLLSEGDSLIVNCSYETTQYPSLFWYVQYPGEGPQLLLKAMKANDKG
RNKGFEATYHKETTSFHLEKDSVQEADSAVYFCALS
>V65RF-ADFV01192037.1-trav |(3179, 3470)|2.95216889635|(0.986,0.969,0.999)|1
GSCKNQVEQSPQSLIILEGKNCTLQCNYTVSPFNNLRWYKQDTGKGPVSLTIMTLSENTK
SNGRYTATLDADTKQSSLHITASQLSDSASYICVV
>V66RF-ADFV01192037.1-trav |(20251, 20539)|2.98258408012|(0.997,0.987,0.999)|1
VWSQRKEVEQDPGPFNVPEGATVAFNCTYSNSVSQSFFWYRQDCRKEPKLLMSVYSSGNE
DGRFTAQLNRASQYIYLLIRDSQLSDSATYLCAV
>V67RF-ADFV01192037.1-trav |(26000, 26297)|2.99598400013|(0.998,1.000,0.998)|1
GTRAQSVTQLDSHVSVSEGTPVLLRCNYSSSYSPSLFWYVQYPNQGLQLLLKYTSGTTLV
KGINGFEAEFKKSETSFHLTKSSAHVSDAAEYFCAVS
>V68RF-ADFV01192037.1-trav |(31699, 31996)|2.85283890549|(0.992,0.926,0.957)|1
TARAQSVTQPDIHITVSEGASLELRCNYSYGATPSLFWYVQSPGRGLQLLLKYFSGDTLV
QGIKGFEAEFQRSQSSFNLRKPSVHWSDAAEYFCAVS
>V69RF-ADFV01192038.1-trav |(2363, 2653)|2.0240453611|(0.954,0.908,0.587)|1
VNGENVEQHPSTLSVQEGESSVIKCTYSDSASNYFPWYKQELGKGPKLIIDIRSNVGEKK
DQRITVTLNKTAKHFSLHITEIQPGDSAVYFCAAS
>V70RF-ADFV01192038.1-trav |(22028, 22319)|2.98209640489|(0.999,0.984,1.000)|1
VWSQQKEVEQNSGPLSDPEGAIASLNCTYSDRSSQSFFWYRQYSGKSPELITSIYSNGDK
EDGRFTAQLNKASQYVSLLIRDSQLSDSATYLCAV
>V71RF-ADFV01192038.1-trav |(28540, 28837)|2.9824040992|(1.000,0.990,0.993)|1
GTRAQSVTQLDSHVSVSEGTLVLLRCNYSSSVSPNLFWYVQYPNQGLQLLLKYISGTTLV
KGINGFEAEFKKSETSFHLTKPSAHVSDAAEYFCAVS
>V72RF-ADFV01192038.1-trav |(50418, 50711)|2.98676801985|(0.997,0.990,1.000)|1
VSRGESVGLHLPTLSVQEGNNSVINCAYSDSASDYFTWYKQESGKGPQFIIDIRSNMDKR
QGQRVTVLLNKTVKHLSLQIAATQPGDSAVYFCAEN
>V73RF-ADFV01192039.1-trav |(5009, 5312)|2.99089600501|(0.995,0.996,1.000)|1
PGIAQKIIQTQPAMFVQEKEAVTLDCTYDTSDQSYGLFWYKQPSSGEMIFLISQASYDKQ
NATEGRYSLNFQKARKSANLVISASQLGDSAKYFCAMRE
>V74RF-ADFV01192039.1-trav |(24309, 24603)|2.9909280013|(0.997,0.994,1.000)|1
RTHGDSVTQMEGPVTLSEEAFLTINCTYTATGYPTLFWYVQYPGEGPQLLLKATRADDKG
SNKGFEATYRKETTSFHLEKDSVQESDSAVYFCALS
>V75RF-ADFV01192039.1-trav |(50026, 50319)|2.98386400565|(0.994,0.999,0.991)|1
VWCQQKEVEQNPGPLSVPEGAIASLNCTYSNSAFQYFMWYRQYSRKGPELLMYTYSSGNK
EDGRFTAQVDKSSKCISLFIRNSQPSDSATYLCAMS
>V76RF-ADFV01192039.1-trav |(63753, 64050)|1.8850061943|(0.983,0.893,0.557)|1
GTRAQSVTQLDSQVPVFEEGPVELRCNYSSSVSVYLFWYVQYPNQGLQLLLKYTSGPTLV
KGINGFEAEFKKSETSFHLRKPSAHISDAAEYFCAVS
>V77RF-ADFV01192039.1-trav |(82783, 83070)|2.96370067828|(0.996,0.979,0.990)|1
VNSQQGEEDPQALTIQEGENATMNCSYKSSTNSLQWYRQESGRGLVHLILIRSNEREKHS
GRLRVTLDTSKKSSSLLITASRAADTASYFCAME
>V78RF-ADFV01192039.1-trav |(88347, 88638)|2.98896000066|(0.997,0.994,0.998)|1
RTNGDSVTQTEGPVTLPEQAALTLNCTYQSSYSTFLFWYVQYLNKAPELLLKSSENQETD
SRGFQASHVKSDSSFHLEKPSVQLSDSAVYYCALR
>V79RF-ADFV01192039.1-trdv |(91529, 91832)|2.86669524928|(0.985,0.937,0.957)|1
SSMTQKVTQAQTEISVVEKEDVTLDCVYESRDTTYYLFWYKQLPSGELVFLIRQNSFNEQ
NEINGRYSWNFQKSTSSFNLTITASQVMDSAVYFCALND
>V80RF-ADFV01192040.1-trav |(2622, 2909)|2.32468794359|(0.905,0.676,0.937)|1
LSGEDQVTQSPEALRLQEGENSSLICSYTVSNLRGLLWYRQDPGKGPEFLFILYSAGEEK
EKERLKATLTKEESFLHITAPKPEDSATYLCAVQ
>V81RF-ADFV01192040.1-trav |(15508, 15807)|2.14776077907|(0.879,0.598,0.988)|1
VSSKQEVTQIPAALSVPEGDNLVLNCSFTDSAIYNLQWFRQDPGKGLTSLLIIQSSQREQ
TSGRLNASLDKSSGRSTLYIAASQPGDSATYLCAVRHS
>V82RF-ADFV01192042.1-trav |(5847, 6159)|1.51117055436|(0.698,0.522,0.523)|1
VRGIQVEQSPPDLILQEGANSTLRCNFSATVNNLQWFHQNPWGQLINLFYIPSGTKQNGR
LSATTVTTERYSLLYISSSQTTDSGVYFCAVEPQCSPGTFSL
>V83RF-ADFV01192042.1-trav |(20737, 21049)|1.83712634535|(0.724,0.511,0.781)|1
VSGQQKEKSDQQQVKQSPQSLIVQKGGISIINCAYENSAFDYFPWYRQFSGKGPALLIAI
RSVVNEKEERRFKIFLNKSAKHFSLHIMDSQPGDSATYFCAA
>V84RF-ADFV01192042.1-trav |(28970, 29270)|2.02790343079|(0.683,0.625,0.888)|1
SSVAQEVTQAQSSVSMPVGKAVTLNCLYETSSWSYYIFWYKQLPSKEMILLIRQGSAEQN
AKNGRYSVNFKKAANSIALTISALRLEDSAKYFCALGE
>V85RF-ADFV01192042.1-trav |(37852, 38142)|1.72669129174|(0.920,0.530,0.794)|1
VSSVLNVEQSPQSLHVQEGDSTNFTCSFPSSNFYALHWYKWETAKSPKALFVMNLNGDEK
KKGRINATLNTKEGYSYLYIKGSQPEDSATYLCAF
>V86RF-ADFV01192042.1-trav |(45516, 45815)|2.10117652444|(0.945,0.826,0.661)|1
VNGQQIMQIPQCQHVQEGEDFTTYCNSSTTLSNIQWYKQRPGGHPVFLIQLVKSGEVKKQ
KRLTFQFGEAKKNSSLHITATQTTDVGTYFCAGHSAPQ
>V87RF-ADFV01192042.1-trav |(56528, 56818)|2.97745609036|(0.994,1.000,0.984)|1
TIIDAKTTQPTSMDCAEGRAANLPCNHSTISGNEYVYWYRQIHSQGPQYIIHGLKNNATN
EMASLIITEDRKSSTLILPHATLRDTAVYYCIVRV
>V88RF-ADFV01192042.1-trav |(77809, 78096)|1.98234698178|(0.714,0.782,0.577)|1
VSTQQLEQSPRFLSIQEGENLTVYCNSSTPVFSSLQWYRQDPGEGPVLLVTVVTGGEVKK
LKRLTFQFGDARKDSSLHITAAQPGDTGLYRCAG
>V89RF-ADFV01192042.1-trav |(83063, 83387)|2.39133090707|(0.758,0.836,0.913)|1
VNSQQKNDDQQVKQNLPSLSVQEGRISILNCDYTNSMFDYFLWYKKYPAEGPTFLISIRS
TEDKNEDGRFTVFLNKSAKHLSLHIVASQPGDSAVYLCAASAQCSP
>V90RF-ADFV01192042.1-trav |(88222, 88509)|2.09806943977|(0.856,0.589,0.915)|1
VRSQQPVQSPEAVILREGEDAIINCNSSKVLYSVHWYRQKRGEAPVFLMILLKGGEQKSH
DKISATFNEKKQQSSLYLVASQLSYSGTYFCGAE
>V91RF-ADFV01192042.1-trav |(97069, 97372)|1.73748930649|(0.627,0.505,0.863)|1
SSMSQRVIQSQPAISTQEGETVKLDCSFKTNIVYYILYWYKRPPNEKIIFLIYQQTDADT
NATQGQYSVSFQKATETIQLIISSSQPEDSATYFCCLKE
>V92RF-ADFV01192045.1-trav |(9669, 9956)|1.54137890808|(0.500,0.725,0.797)|1
VGSQELEQSRQSLIVEEGKNLTIKCMSSKTLYGLYWYKQNYGEGLIFLMMLQKGGEEKSH
EKITAKLDEKKQQSSMHITASEPSHAGIYLCGAD
>V93RF-ADFV01192045.1-trav |(29460, 29750)|2.90245386218|(0.966,0.987,0.952)|1
VSSEDKVVQSPLSLVVHEGDTVTLNCSYEVTNFRSLLWYKQEKKAPTFLFMLTSSGIEKK
SGRLSGILDNRELFSILNITATETRDSAIYLCAVE
>V94RF-ADFV01192049.1-trdv |(617, 918)|2.67815267208|(0.954,0.862,0.905)|1
SGMAQTVTQSQPEMSVQEAETVTLSCTYDTTESDYYLFWYKLPPSRQMILIIRQEAYKQQ
NATENHFSVNFQKAAKSFSLKISDSQLGDTAMYFCAFM
>V95RF-ADFV01192049.1-trav |(9724, 10024)|2.98570803341|(0.999,0.991,0.996)|1
FSMAQTVTQSQPEMSVQEAETVTLSCTYDTTESDYYLFWYKQPPSRQMILIIRQEAYKQQ
NATENRFSVNFQKAAKSFSLKISDSQLGDTAMYFCAYR
>V96RF-ADFV01192050.1-trav |(14951, 15239)|2.96069025636|(0.993,0.970,1.000)|1
LSGELKVGQNPPFLSTQEGKNYTIYCNYSTISDRLYWYRQDPGKSLESLFVLLSSGAVKQ
EGRLMASLDTKARLSTLHITAAVHDLSATYFCAV
>V97RF-ADFV01192052.1-trav |(11470, 11756)|1.71788363947|(0.547,0.614,0.799)|1
VSDAKNEVEQSPQDLTAQEGEFITINCSYSIGITALQWLQQHQGGGIVSLFMLSSGKKKN
GRLMATINIQEKHSSLHITASQPRDSAIYICAV
>V98RF-ADFV01046571.1-trgv |(4061, 4374)|2.96755704207|(0.996,0.996,0.977)|-1
SQKSSNLEGRTKSVTRPTGSSAEITCDLTVTDTFYIHWYLHQEGKAPQRLLYYDVSDSRD
VLESGLSQVKYYTHTPRRWSWILILRNLIENDSGVYYCASWG
>V99RF-ADFV01046573.1-trgv |(27483, 27793)|2.45361867528|(0.949,0.876,0.770)|-1
SQKSSNLEGRTKSVTRPTGSSAEITCDLPGASTLYIHWYLHQEGKAPQRLLYYEPYYFRV
VLESGITPGKYDTASTRSSWNLRLQNLIEKDSGVYYCATWD
>V100RF-ADFV01106195.1-igkv |(132520, 132838)|2.36991881757|(0.997,0.690,0.997)|-1
AYGDIVMTQSPDSLAVSLGERVTINCKSSQSVLYSSNNKNYLNWYQQKPGQAPKLLIYWA
STRESGVPDRFSGSGSGTDFTLTISSLQAEDVAVYYCQQSYSTP
>V101RF-ADFV01106214.1-igkv |(93146, 93461)|2.73656294027|(0.982,0.843,0.986)|-1
TSGDIVMTQTPLSLPVTPGEPTSISCRSSQSLLHSDGCTYLAWYLQKPGQSPQLLIYAVS
YRASGVPDRFSGSGSGTDFTLKISRVEAEDVGVYYCMQALQAP
>V102RF-ADFV01106214.1-igkv |(102002, 102302)|3.0|(1.000,1.000,1.000)|-1
ARCDIQMTQSPSSLSASVGDSVTITCRASQGISNWLAWYQQKPGKAPKLLIYKASSLQSG
IPSRFSGSGSGTTYTLTISSLQPEDFATYYCQQSYSTP
>V103RF-ADFV01131933.1-ighv |(14064, 14373)|2.99696400065|(1.000,0.997,1.000)|-1
AHSQVQLVQSGAEVKKPGASVKVSCKASGYTFTSYNMYWVRQAPGQGLEWMGVINPSSGG
TSYAQKFQGRVTMTRDTSISTAYMELSSLRSEDTATYYCAR
>V104RF-ADFV01131938.1-ighv |(1713, 2022)|2.9789280013|(0.993,0.996,0.990)|-1
AHSQVQLVQSGAEVKKPGTSVKVSCKASGYTFTSYAMNWARQAPGQRLEWMGWINTNTGN
PTYAQGFKERFVFSMDTSVSTAYLQISSLKAEDTAVYYCAR
>V105RF-ADFV01131939.1-ighv |(1427, 1736)|2.9789280013|(0.993,0.996,0.990)|-1
AHSQVQLVQSGAEVKKPGTSVKVSCKASGYTFTSYAMNWARQAPGQRLEWMGWINTNTGN
PTYAQGFKERFVFSMDTSVSTAYLQISSLKAEDTAVYYCAR
>V106RF-ADFV01131940.1-ighv |(4183, 4492)|3.0|(1.000,1.000,1.000)|-1
VQCDVQLVESGGGLAQPGGSLRLSCAASGFTFSNYYMSWVRQAPGKGLEWVSYISGDSSY
IYYADSVKGRFTISRDNAKNSLYLQMNSLRAEDTAVYYCTR
>V107RF-ADFV01131940.1-ighv |(12421, 12735)|2.48814052572|(0.954,0.765,0.910)|-1
VLSQVTLKESGPTLVKPTQTLTLTCTFSGFSLSTSGVGVGWIRQPPGKALEWLARIDWDD
DKYYSTSLKTRLTISKDTSKNQVVLTMTNMDPVDTATYYCARR
>V108RF-ADFV01131940.1-ighv |(27838, 28144)|2.71748950129|(0.994,1.000,0.828)|-1
VLSQVQLQESGPGLVKPSETLSLTCAVSGGSISGYYWSWIRQPPGKGLEWIGSIDSSGSK
YLNPSLKSRVTMSADTSKNQFSLKLSSVTAADTAVYYCAR
>V109RF-ADFV01131944.1-ighv |(5787, 6101)|2.99899600001|(1.000,0.999,1.000)|-1
VQCAVQLVESGGGLVQPGGSLRLSCAASGFTFSDYYMSWVRQAPGKGLEWVAVIRNKANG
GTTEYAASVKGRFTISRDDSKSIAYLQMNSLKTEDTAVYYCAE
>V110RF-ADFV01131946.1-ighv |(2041, 2350)|2.98474003277|(0.998,0.997,0.990)|-1
AHSEVQLVQSGAEVKKPGATVKISCKVSGYTFTSYYMHWVQQAPGKGLEWMGGVDPEGGE
TIYAEKFQGRVTITADTSTDTAYMELSSLRSEDTAVYYCAR
>V111RF-ADFV01131948.1-ighv |(1585, 1907)|2.43606576492|(0.915,0.720,0.946)|-1
VLSQVTLKESGPALVKPTETLTLTCTVSGFSLSTSGMGMSWIRQPPGKALEWLAHIFSND
QKSYSTSLKSRLTISKDTSKSQVVLAMTNMDPVDTATYYCARRAQ
>V112RF-ADFV01131950.1-ighv |(11086, 11386)|3.0|(1.000,1.000,1.000)|-1
QCEVQLVESGGSLVQPGGSLRLSCAASGFTFSDYYMHWVRQAPGKGLEWVSEITNSSTYY
ADSVKGRFTISRDNAKNTLYLQMNSLRAEDTAVYYCAK
>V113RF-ADFV01131950.1-ighv |(21617, 21923)|3.0|(1.000,1.000,1.000)|-1
VLSQVQLQESGPGLVKPSETLSLTCAVSGGSISGYYWSWIRQPPGKGLEWIGYIYSSGST
NYNPSLKSRVTMSVDTSKNQFSLKLSSVTAEDTAVYYCAR
>V114RF-ADFV01131951.1-ighv |(9601, 9910)|3.0|(1.000,1.000,1.000)|-1
VQCEVQLVESGGGLVQPGGSLRLSCAASGFTFSSYDMNWVRQAPGKGLEWVSYISSGGGT
IYYADSVKGRFTISRDNAKNSLYLQMNSLRAEDTAVYYCAK
>V115RF-ADFV01131951.1-ighv |(17955, 18261)|2.68427814164|(0.962,0.859,0.914)|-1
VLSQVQLQQWSAGPVKPSETLSLTCAVYGGSISGYYWGWIRQPPGKGLEWIGLIDSSGST
NYNPSLRSRVTMSVDTSKNQFSLKLSSVTAADTAVYYCAR
>V116RF-ADFV01131954.1-ighv |(4903, 5218)|3.0|(1.000,1.000,1.000)|-1
VQCEVQLVESGGGLVQPGGSLRLSCAASGFTFSDYAMSWVRQAPGKGLEWVGFIRSKAYG
GTTEYAASVKGRFTISRDDSKSVAYLQMNSLKTEDTAVYYCTR
>V117RF-ADFV01131956.1-ighv |(7476, 7785)|3.0|(1.000,1.000,1.000)|-1
VQCEVQLVESGGGLVQPGASLKLSCAASGFTFSSYGMHWVRQAPGKGLEWVSSISTSSSY
IYYADSVKGRFTISRDNSKNTLYLQMNSLRAEDTAVYYCAR
>V118RF-ADFV01131956.1-ighv |(12171, 12475)|1.9473391378|(0.974,0.984,0.532)|-1
CAEVQLVQSGAEVKRPGESLRISCKGSGYSFTSYWISWVRQMPGKGLEWMGMIYPSDSDT
RYSPSFQGHVTISADKSISTAYLQWSSLKASDTATYYCA
>V119RF-ADFV01131957.1-ighv |(4591, 4897)|2.84018969173|(0.976,0.897,0.993)|-1
VLSQVQLQESGPGLVKLSETLSLTCAVSGGSISGYYWSWIGQPAGKGLEWIGYIHSSGST
NYNPSLKSRVTMSADTSKNQFSLKLSSVTAEDTAVYYCAR
>V120RF-ADFV01131958.1-ighv |(4025, 4334)|2.99596000066|(1.000,0.997,0.999)|-1
AHSQVQLVQSGPEVKKPGASVKVSCKASGYTFTSSAMQWVRQAPGQGLEWMGWIIVGNGN
TNYAQKFQGRVTITRDTSTSTAYMELSSLRSEDTAVYYCAT
>V121RF-ADFV01131959.1-ighv |(269, 578)|2.95921476928|(0.999,0.988,0.975)|-1
AHSEVQLVQSGAEVKKPGATVKISCKASGYTFTSSYMHWVQQAPGKGLEWMGRVDPEDGE
TKYAEKFQGRVTITADTSTDTAYMELSSLRSEDTAVYYCAT
>V122RF-ADFV01131961.1-ighv |(38, 353)|3.0|(1.000,1.000,1.000)|-1
VQCEVQLVESGGGLVQPGGSLRLSCAASGFTFSNYWMHSVRQAPGKGLEWVGRIKNKADG
GTAEYAASVKGRFTISRDDSKNTLYLQMNSLKTEDTAVYYCTR
>V123RF-ADFV01131961.1-ighv |(8796, 9087)|1.97354260825|(0.976,0.541,0.988)|-1
AAVESGGGLVQPGGSLRLSCVASGFTFSNYAMGWVRQAPGKGLEWVSSISGSGSTYYPDS
VKGRFTISRDNAKNTLYLQMNSLRAEDTAVYYCAK
>V124RF-ADFV01131961.1-ighv |(20094, 20382)|1.92785503826|(0.660,0.792,0.573)|-1
VQCEVQLVESGGGLVQPGGSLRLSCAASGFTFSNNYMHWVRQAPGKGLEWVGLIRNKADG
GTTDYAASVKGRFTISRDDSKSIAYLQMNSLKTE
>V125RF-ADFV01131961.1-ighv |(37937, 38246)|3.0|(1.000,1.000,1.000)|-1
VQCEVQLVESGGGLVQPGGSLRLSCAASGFTFSSYGMNWVRQAPGKGLEWVSYISSGGGT
IYYADSVKGRFTISRDNAKNSLYLQMNSLRAEDTAVYYCTR
>V126RF-ADFV01131961.1-ighv |(48794, 49103)|2.59164525147|(0.975,0.996,0.773)|-1
VQSQVQLVQSGAEVKKPGSSVKVSCKASGGTFSSYAISWVRQAPGQGLEWMGVIIPAADL
TNYAQKFQGRLTITADTSTSTAYMELSSLRSEDTAVYYCAR
>V127RF-ADFV01132915.1-iglv |(43582, 43891)|2.16990075272|(0.956,0.614,0.975)|-1
SWANFMLTQPHSVSGSVGQKVVISCARSSGSIGSYYVQWYQQRSGSAPTTVIYKDNQRPT
GAPDRFSGSIDSSSNSASLTISGLETEDEADYYCQSYDSSN
>V128RF-ADFV01132915.1-iglv |(73010, 73322)|1.97995506583|(0.993,0.875,0.610)|-1
SWAEVVFTQPHSVSGSPGQTVTISCTRSSGSIASRYVHWYQQRPGSAPTTVIYDDVPRPS
GVPDRFSGSIDSSSNSASLTISGLKSEDEADYYCQSADDSYN
>V129RF-ADFV01132915.1-igkv |(87286, 87596)|1.80760397979|(0.661,0.735,0.515)|-1
SLSQPVLTQSPSASASPGASVKLTCTLSSGHSSYTIAWHQQQPEKAPRYLMKLSSDGSHS
KGDGIPDRFSGSSSGAERYLTISNLQSEDEADYYCQTWGSG
>V130RF-ADFV01132915.1-iglv |(116005, 116315)|2.47100399931|(0.949,0.938,0.742)|-1
SWAEVVFTQPHSVSGSPGQTVTISCTRSSGSIASNYVHWYQQRPDSAPTTVIYSDDQRPS
GVPDPFSGSIDSSSNSASLTISGLKSEDEADYYCQSYDSSS
>V131RF-ADFV01132918.1-iglv |(49559, 49868)|2.96906440553|(0.984,0.987,0.999)|-1
SWAQSVLTQPPSVSGTPGQRVTISCSGSSSNIGSNNVHWDQQLPGTAPKLLIYYNDQRPS
GVPDRFSGSKSGTSASLAITGLRSEDEADYYCEAWDDSLSG
>V132RF-ADFV01132961.1-igkv |(18470, 18770)|2.99185201038|(0.999,0.993,1.000)|-1
ARCDIQMTQSPSSLSVSVGDRVTITCRASQGISNELAWYQQKPGQAPMLLIYAASSLQTG
VPSRFSGSGSGTDYTLTISSLQPEDVATYYCLQDYTTP
>V133RF-ADFV01132961.1-igkv |(54096, 54396)|2.42603915281|(0.914,0.885,0.742)|-1
ATCDIQMTQSPSSLSASVGDRVTITCRASQGINNELAWYQQKPWKDPKLLIYSASNLLMG
VPSQFSGSGPGTDYTLTISSLQPEDAATYYCQWDYNTP
>V134RF-ADFV01132961.1-igkv |(60846, 61149)|2.27916323784|(0.982,0.770,0.807)|-1
IVMTQTPLSLPFTPGEAASISCRSSQSLLDSDGYTYLDWYLQKPGQSPQLLIYAVSNRAS
GVPDRFSGSGSGTDFTLKISRVEAEDVGVYYCLQALQAP
>V135RF-ADFV01132961.1-igkv |(93218, 93536)|2.9711523093|(0.994,0.980,0.998)|-1
STGDIVMTQTPLFLSITLGEPASISCRSSQSLFYSDDQNIYLDWYLQKPGQSPQLLIYFV
SYRASGVPDRFSGSGSGTDFILKISRLEAEDVGVYYCMQRIEFP
>V136RF-ADFV01132961.1-igkv |(104510, 104810)|2.99185201038|(0.999,1.000,0.993)|-1
ARCDMQMTQSPSSLSASVGDTVTITCRASQSISSYLNWYQQKPGKIPKLLIYAASTLQSG
VPSRFSGSGSGTDFTVTISSVQPEDFATYYCQHGYGTP
>V137RF-ADFV01132961.1-igkv |(146778, 147093)|2.99899600001|(1.000,1.000,0.999)|-1
SSGDIVMTQTPLSLSITPGEPASISCRSSQSLRYSDGNTYLYWYLQKPGQSPQLLIYRVS
NRFSGVPDRFSGSGSGTDFTLKISRVEAEDVGVYYCMQDLQAP
>V138RF-ADFV01132961.1-igkv |(157570, 157870)|2.98771202074|(0.992,0.998,0.998)|-1
ARCAIQMTQSPSSLSASVGDRVTITCRTSQGISNWIAWYQQKPGKAPKHLIYGASNLQTG
VPSRFSESGSGTDYTLTVSSLQPEDSTTYYCQQYDIFP
>V139RF-ADFV01132961.1-igkv |(167109, 167423)|2.51657203979|(0.995,0.797,0.903)|-1
SSGDVVMTQTPLSLPVTPGEPASISCRSSQSLLHSNGNTYLHWYLQKPGQSPQLLIYKVS
NRASEIPDRFSGSGSGTDFTLKISRVEAEDVGVYYCMQSTKVS
>V140RF-ADFV01132961.1-igkv |(188116, 188416)|2.98651211712|(0.999,1.000,0.988)|-1
IRCAIQMTQSPSSLSASVGDRVTITCRASQGISNYLNWYQQKPGKAPKLLIYRASSLETG
VPSRFSGSGSGTDFALTISSLQPEDIATYYCLQYDNLP
>V141RF-ADFV01132961.1-igkv |(214992, 215307)|2.32139587219|(0.907,0.716,0.848)|-1
SSGDVVMTQSPLSLPVTPGQPASISCRSSQSLVHSDGKTYLYWFQQRPGQPPRRLIYQVS
NRDSGVPDRFIGSGAGTDFTLKISRVEAEDVGVYYCMQGTQFP
>V142RF-ADFV01132961.1-igkv |(225521, 225836)|2.94831671213|(0.993,0.979,0.978)|-1
SSGDIVMTQTPLSLSITPGEPASISCRSSQSLRHSNGYTYLDWYLQKPGQSPQLLIYLGS
NRASGVPDRFSGSGSGTDFTLKISRVEAEDVGIYYCMQGIQLP
>V143RF-ADFV01132961.1-igkv |(238675, 238990)|2.66201467401|(0.960,0.843,0.919)|-1
SSGNIVLTQSPLSLPVTPGEPASISCRSSQSLLHSNGYNYLYWYLQKPGQSPQLLIYLGS
NRASGVPDRFSGSGSGTDFTLKISRVKAEDVGVYYCMQTLQTP
>V144RF-ADFV01132961.1-igkv |(246969, 247267)|2.97642008525|(0.998,0.990,0.989)|-1
TRCDIQMTQSPSSLSASVGDRVTITCRASQSISKWLAWYQQKPGKVPKLLIYAASTLQSG
VPSRLSGSGSGTDFTLTISSLQPEDVATYYCQKHDSA
>V145RF-ADFV01132961.1-igkv |(265341, 265656)|1.86494553233|(0.939,0.627,0.752)|-1
SSGDIVMTQTPLSLPVTPGQPASISCRSSQSLVHSNGNTYLNWIQQRLGQPPRLLIYKVS
NRASGVPERFSGSGAGTDFTLKISRVEAEDVGVYYCLQGTQFP
>V146RF-ADFV01143437.1-ighv |(651, 966)|2.99899600001|(1.000,1.000,0.999)|-1
VQCEVQLVESGGSLVQPGGSLRLSCAASGFTFSDYYMHWVRQAPGKGLEWVGRIKNKAGG
GTAEYAASVKGRFTISRDDSKNTLYLQMNSLKTEDTAVYYCTR
>V147RF-ADFV01143437.1-ighv |(3728, 4035)|1.89192864927|(0.885,0.522,0.895)|-1
WGRLIKALGGSLRLSCAASGFTFSSYAMHWVRQAPGKGLEWVSVISTSGGTILYTDSVKG
RFTVSRDNAQNSLYLQMNSLRAEDTAVYYCVKDTVSRSQC
>V148RF-ADFV01192057.1-trdv |(25030, 25336)|2.79696000066|(0.931,0.934,0.932)|-1
RGMLCDKVTQSSPDQTVASGSEVVLLCTYDTVYSNPDLFWFRIRPDYSFQFVFYGDDSRS
QAADFTQGRFSVKHILTQKAFHLVISPVRIEDSATYYCAL
>V0RF-AQIB01018214.1-trgv |(163723, 164036)|2.99280401921|(1.000,1.000,0.993)|1
SQKSSNLEGRTKSVTRPTGSSAEITCDLPEVSSFYIHWYLHQEGKAPQRLLYYDTSNSRV
VLESGISSGKYDSYGSTRRNLRLILRNLIENDSGVYYCANWD
>V1RF-AQIB01018215.1-trgv |(1470, 1783)|2.96140247224|(0.998,0.999,0.968)|1
SQKSSNLEGRTKSVTRPTGSSAEITCDFSGDSNFYIHWYLHQEGKAPQRLLYYDVSNSRD
VLESGLSPGKYYTHTRKRWSWILILRNLIENDSGVYYCANWN
>V2RF-AQIB01018217.1-trgv |(6282, 6595)|2.98432022844|(0.999,1.000,0.986)|1
SQKSSNLEGRTKSVTRPTGSSAEITCDLPEVSSFYIHWYLHQEGKAPQRLLYYDSSNSRV
VLESGISSGKYNSYESTRRSLRLRLQNLIENDSGVYYCANWD
>V3RF-AQIB01144236.1-igkv |(33225, 33525)|2.99899600001|(1.000,1.000,0.999)|1
ARCDIQMTQSPSSLSASVGDRVTITCRASQGINKELSWYQQKPGKAPTLLIYAASSLQTG
VPSRFSGSGSGTDFTLAISSLQPEDVATYYCLQDYTTP
>V4RF-AQIB01144236.1-igkv |(99005, 99323)|2.96886989205|(1.000,0.993,0.978)|1
SSGDIVMTQTPLSLPVTPGEPASISCRSSQSLLDSDDGNTYLDWYLQKPGQSPQLLIYEV
SNRASGVPDRFSGSGSDTDFTLKISRVEAEDVGVYYCMQTIEYP
>V5RF-AQIB01144237.1-igkv |(7567, 7881)|2.35606643487|(0.851,0.694,0.929)|1
TSGDILLTQTPLSLPVTPGQLASISCRSSQSLLHSNGNTYLHWYLQEPGQSPQLLIYEVS
NRASGVPDRFSGSGSDTDFTLKINLVEAEDVGVYYCMQLHNGP
>V6RF-AQIB01144237.1-igkv |(12519, 12834)|2.05105286895|(0.928,0.927,0.580)|1
SSGDIVMTQTPLSLPVTLGEQASISCRSSQSLVYSDGKTYLNWYLQKPGQSPQLLMYLVS
KRASGVPDRFSGRGSGTDFTLKISRVEAEDVGVYYCMQALRSP
>V7RF-AQIB01144237.1-igkv |(20593, 20893)|2.41310506154|(0.973,0.955,0.717)|1
ARCDIQMTQSLSSLSASVGDRVTITCRASQGINNELAWYQQKPGKAPMLLLYSGSSLHTG
VPSRFSGSGSGTDFTLAISSLQPEDVAPYYCLQDYTTP
>V8RF-AQIB01144237.1-igkv |(28737, 29052)|2.4340501565|(0.994,0.738,0.943)|1
SSGDIVMTQTPLSLPVTPGEPASISCRSSQSLLDSYGYTNLNWYLQKPGQSPQLLIYLGS
NRASGVPDRFSGSGSGTDFTLKISGVEAEDVGVYYCMQGIQLP
>V9RF-AQIB01144240.1-igkv |(12918, 13233)|2.98548011776|(1.000,0.989,0.997)|1
TSGDIVMTQTPFSLPVNPGEPASISCRSSQSLSDSDGYTYLYWYLQKPGQSPQLLIYLGS
NRASGVPDRFSGSGSGTDFTLKISRVEAEDVGVYYCMQGIQLP
>V10RF-AQIB01144242.1-igkv |(6923, 7238)|2.33918169547|(0.987,0.793,0.813)|1
SSGDIVMTQTPLSLPVTPGEPASISCRSSQSLLHSDGYTYLYWYVQKPGHSPQLLIYLVS
NRASGVPDRFSGSGSGTDFTLKISRVEAEDVGVYYCLQGIQLP
>V11RF-AQIB01144242.1-igkv |(18230, 18530)|2.994900005|(1.000,0.995,1.000)|1
ARCDIQMTQSPSSLSASVGDRVTITCQGSQSLSNFLNWYQQKPGKIPKLLIYRASSLQSG
IPSRFSGSGSGTDYTLTISSLQPEDFATYYCQQGYSYP
>V12RF-AQIB01144242.1-igkv |(33676, 33991)|2.93556771881|(0.997,0.951,0.996)|1
TSGDIVMTQTPLSLPVTPGEPASISCRSSQSLLHSNGYTYLDWYVQKPGQSPQLLIYLVS
SRASGVPDRFSGSGSGTDFTLKISRVEAEDVGVYYCMQGTQLP
>V13RF-AQIB01144243.1-igkv |(9275, 9590)|2.5193786115|(0.983,0.761,0.957)|1
TSGDIVMTQIPLSLPVTPGEPASISCRSSQSLLHSGGKTYLYWYLQKPGQSPQLLIYELS
NRASGVPDRFSGSGSGTDFTLKISGVEAEDVGVYYCMQGIQLP
>V14RF-AQIB01144243.1-igkv |(18759, 19059)|3.0|(1.000,1.000,1.000)|1
ARCDIQMTQSPSSLSASVGDRVTITCQASQGITNDLAWYQQKPGETPKLLIYEASSLQSG
IPSRFSGSGSGTDFTLTISSLQPEDFATYYCQHYYSTP
>V15RF-AQIB01144243.1-igkv |(52384, 52684)|2.99796800026|(0.998,1.000,1.000)|1
ARCDIQMTQSPSSLSASVGDRVTISCRASQNIYSNLAWYQQKPGKTPKLLIYAASSLQSG
IPSRFSGSGSGTDFTLTISSLQPEDYATYYCQHHYGTP
>V16RF-AQIB01144244.1-igkv |(12759, 13074)|2.52845103241|(0.986,0.749,0.995)|1
SSGDIVMTQTPLSLPVTPGEPASISCRSSQSLLHSDGRTYLYWYLQKPGQPPRLLIYTVS
NRFSGVPDRFSGSGSGTDFTLKISRVEAEDVGVYYCMQALQNP
>V17RF-AQIB01144247.1-igkv |(9074, 9389)|2.60210227438|(0.980,0.779,0.993)|1
SIGDIVMTQTPLSLPVTPGEPASISCRSSQSLLHSNGNTYLYWYLQKPGQPPQLLIYRVS
NRFSGVPDRFSGSGSGTDFTLKISRVEAEDVGVYYCMQALQTP
>V18RF-AQIB01144251.1-igkv |(6848, 7148)|2.98874403277|(0.999,0.999,0.991)|1
ARCDIQMTQSPSSLSASVGDRVTITCHASQGISNWLAWYQQKPGKAPKLLIYYASNLETG
VPSRFSGSRSGTDFTVTISSLQPEDIATYYCQQYDNFP
>V19RF-AQIB01144257.1-igkv |(11968, 12268)|2.97236527997|(0.997,1.000,0.977)|1
ARCDIQMTQSPSSLSASVGDRVTITCRASQGINNYLSWYQQKPGKAPKPLIYYASSLETG
VPSRFSGSGSGPDYTLTISSLQPEDIATYYCQQYDNFP
>V20RF-AQIB01144258.1-igkv |(1398, 1700)|2.58335005376|(0.887,0.819,0.896)|1
FSADVVMTQSPLSLPVTPGQPASITCRSSQSLLHSNGNTYLNWFLQKPGQPPRRLIYTVS
NRDSGVPDRFSGSGAGTDFTLKISRVEAEDVGVYYCMQV
>V21RF-AQIB01144263.1-igkv |(12287, 12602)|2.46610778961|(0.937,0.737,0.940)|1
SSGDVVMTQSPLSLPVTLGQPVSISCRSSQSLVHSDGKTYLNWLQQKPGQPPRLLIYQVS
NRYSGVPDRFSGSGAGTDFTLKISRVEAEDVGVYYCMQGTHFP
>V22RF-AQIB01144263.1-igkv |(20713, 21015)|2.67162740027|(0.976,0.842,0.931)|1
SSGDVVMTQSPLSLPVTPGQPASISCRSSQSLVHSDGKTYLNWFQQKPGQPPRRLIYQVS
SRDSGVPDRFSGSGAGTDFTLKISRVEAEDVGVYYCVQG
>V23RF-AQIB01144263.1-igkv |(50626, 50941)|2.73615570272|(0.996,0.845,0.983)|1
SSGDIVMTQTPLSLPVTLGEPASISCRSSQSLVYSDGKTYLDWYLQKPGQSPQLLIYYGS
NRASGVPDRFSGSGSGTDFTLKISSVEAEDVGVYYCMQAIQTP
>V24RF-AQIB01144263.1-igkv |(59031, 59331)|2.72652163966|(0.990,0.936,0.869)|1
TRCAIQMTQSPSSLSASVGDRVTITCWASQSIGSNLAWYQQKPGKVPKLLIYAASTLQSE
VPSRFSGSGSGTDFTLSISSLQPEDVATYYCQKCDSAH
>V25RF-AQIB01144263.1-igkv |(96224, 96526)|2.60447591431|(0.925,0.894,0.827)|1
STGDVVMTQSPLSLPVTPGEPASISCRSSQSLLHSSGNTYLSWFQQKPGQSPRRLIYKVS
NRDSGVPDRFTGSGAGTDFTLKISRVEAEDVGVYYCMEG
>V26RF-AQIB01144264.1-igkv |(29331, 29633)|2.60447591431|(0.925,0.894,0.827)|1
STGDVVMTQSPLSLPVTPGEPASISCRSSQSLLHSSGNTYLSWFQQKPGQSPRRLIYKVS
NRDSGVPDRFTGSGAGTDFTLKISRVEAEDVGVYYCMEG
>V27RF-AQIB01144264.1-igkv |(45678, 45976)|2.8490470192|(1.000,0.894,0.999)|1
SKGEIVLTQSPAFRSVTLKEKVTITCQASQSIGSSLHWYQQKPDQSPKLLIKYASQSISG
VPSRFSGSGSGTDFTLTINSLEAEDAATYYCQQSSSF
>V28RF-AQIB01144264.1-igkv |(72133, 72421)|2.99067605248|(1.000,0.991,1.000)|1
IVLTQSPATLSLSPGETATLSCRASQSVGSSLAWYQQKPGQVPRLLIYGASSRATGIPDR
FSGSGSGTEFTLTISSLQPEDFAVYYCQKYSSSP
>V29RF-AQIB01144264.1-igkv |(77620, 77920)|2.31825084019|(0.953,0.999,0.662)|1
VRCDIQMTQSPSFLSASVGDRVTITCQASQSISNDLAWYQQKPGKSPTLLICDATNLHTG
VPSWFSGSGSGADYYLTISSLELEDFAAYYCQQEYSYP
>V30RF-AQIB01144264.1-igkv |(103470, 103785)|2.11424379017|(0.759,0.639,0.773)|1
SSGDIVMIQTPLSLPVTPGEPASISCRSSQNLLHSDGNTYLHWYLQKPGQSPQLLIYGGS
NRFAGVPDRFSGSGSATDFTMKISRVEAKDVGVYYCMQGIQFP
>V31RF-AQIB01144265.1-igkv |(9151, 9443)|2.83958358676|(0.998,0.889,0.999)|1
SRGDIVMTQSPAFVSVTPGEKVTITCQASEGISNYLHWYQQKPDQAPKLLIQYASQSISG
VPSRFTGSGSGTDFTFTISSLEVEDAATYYCQQGN
>V32RF-AQIB01144265.1-igkv |(25389, 25680)|2.98064403777|(0.998,0.993,0.990)|1
DIQMTQSPSSLSASVGDRVTITCQASQSFSSSLAWYQQKPGKAPKLLIYAASSLQSGVPS
RFSGSKAGTDFTLTISSLQPEDVATYYCQQYYSTP
>V33RF-AQIB01144265.1-igkv |(40570, 40862)|3.0|(1.000,1.000,1.000)|1
AKCDIQMTQSPSSLSASVGDRVTITCRASQTISSYLAWYQQKPGKVPKLLIYAASSLESG
IPSRFSGSGSGTEFTLTISSLQPEDFATYYCQQHN
>V34RF-AQIB01144265.1-igkv |(60992, 61284)|2.98493200206|(0.994,0.993,0.998)|1
ARCDIQMTQSPSSLSASVGDRVTVTCRASQGISNYLSWYQQEPGKAPKLLIYAASSLESG
VPSRFSGSGSGTEFTLTISSLQPEDFATYYCLQHN
>V35RF-AQIB01144265.1-igkv |(75665, 75964)|3.0|(1.000,1.000,1.000)|1
TTGEIVMTQSPATLSLSPGERATLSCRASQSVSSYLAWYQQKPGQAPRLLIYGASSRATG
IPDRFSGSGSGTEFTLTISSLEPEDVGVYYCQQYNNWN
>V36RF-AQIB01144265.1-igkv |(84906, 85206)|2.99799600001|(0.999,1.000,0.999)|1
ARCDIQMTQSPSSLSASVGDRVTITCRASQGISNYLNWYQQKPGKAPKLLIYSASRLQSG
VPSRFSGSGSGTEFTLTISSLQPEDFATYYCEQFKNYL
>V37RF-AQIB01144269.1-igkv |(1727, 2027)|2.65098718013|(0.870,0.947,0.858)|1
STGEIVMTQSPATLSLSPGETTTLSCSASQSVGSYLAWYQQKPGQAPKLLIHSAYFRATG
IPDRFSGSGSRTVFTLTISSLEPEDVGVYYCQQYNDLP
>V38RF-AQIB01144269.1-igkv |(40447, 40747)|2.99280401921|(1.000,1.000,0.993)|1
ARCDIQLTQSPSSLSASVGDRVTITCRASQGISSYLAWYQQKPGKAPKLLIYDASNLQSG
VPSRFSGSGSGTEFTLTISSLQPEDFATYYCQQRNSLP
>V39RF-AQIB01144273.1-igkv |(1759, 2059)|2.99799200002|(1.000,0.999,0.999)|1
ARCDIQMTQSPSSLSVSVGDRVTITCRASQGISNYLSWYQQKPGKAPKLLIYSASSLESG
VPSRFSGSGSGTDYTLTISSLQPEDFAAYYCLQYQSIP
>V40RF-AQIB01144273.1-igkv |(12272, 12572)|2.6994252064|(0.975,0.927,0.859)|1
TTREIVFTQSPATLSLSPGERATLSCRASQSVGSSLAWYQQKSGQAPRLLVYHASSRATG
IPARFSGSGSGTDFTLTISSLEPEDVGVYYCQKYNDWP
>V41RF-AQIB01144273.1-igkv |(55407, 55707)|2.98432022844|(0.999,1.000,0.986)|1
ARCDIQMTQSPSSLSASVGDRVTITCRASQGISNALAWYQQKPGKVPKLLIYAASSLQSG
LPSGFSGSGSGTEFTLTISSLQPEDFATYYCQQGYSTP
>V42RF-AQIB01144273.1-igkv |(67090, 67390)|3.0|(1.000,1.000,1.000)|1
ARCDIQMTQSPSSLSASVGDRVTITCRASQGISNNLAWYQQKPGKAPKLLIYDATTLQSG
VPSRFSGSGSGTEFTLTISSLQPEDFATYYCQQYNSYP
>V43RF-AQIB01144273.1-igkv |(86428, 86728)|2.92157765396|(0.986,0.982,0.957)|1
TTGEIVMTQSPATLSLSPGETATLSCKTSQSVGSKLAWYQQKPGQAPRLLIYGASSRATG
IPARFSGSGSGTDFTLAISSLEPEDVGAYYCQETSSLS
>V44RF-AQIB01144274.1-igkv |(43133, 43433)|2.94081638724|(0.982,0.968,0.992)|1
ARCDIQMTQSPSSLSASVGDTVTITCPASQGISSYLNWYQHKPGKAPKLLIYYATTLQSG
VPSRFSGSGSGTEFTLTISSLQPEDFAAYYCQQYKSLP
>V45RF-AQIB01144274.1-igkv |(49577, 49877)|3.0|(1.000,1.000,1.000)|1
ARCDIQMTQSPSSLSASVGDKVTITCHASQGISSWLAWYQQKPGKAPKLLIYKASSLQSG
VPSRFSGSGSGTDFTLTISSLQPEDFATYYCQQITSAP
>V46RF-AQIB01144274.1-igkv |(65782, 66082)|2.12149072776|(0.977,0.593,0.999)|1
TTGEIVMTQSPATLALSPGERATLSCRTSQSVSSRLAWYQQKPGQAPRLLIYDASSRATG
IPDRFSGSGSGTEFTLTISSLEPEDVGVYYCQQDYSWP
>V47RF-AQIB01144276.1-igkv |(25002, 25302)|2.98580001921|(0.998,0.991,0.997)|1
ARRDIQMSQSPSSLSASVGDRVTITCHASQGISSWLAWYQQKPGKAPKLLIYKASSLQSG
VPSRFSGSGSGTDFTLTISSLQPEDFATYYCLQYDSNP
>V48RF-AQIB01144276.1-igkv |(29444, 29742)|2.3746002007|(0.973,0.686,0.999)|1
TTGEIVMTQSPATLALSPGERATLSCRASQSVSSRLAWYQQKPGQAPRLLIYDASSRATG
IPDRFSGSGSGTDFTLTISSLEPEDVAVYFCQQESNW
>V49RF-AQIB01144276.1-igkv |(40183, 40483)|2.994900005|(1.000,1.000,0.995)|1
ARCDIQMTQSPSSLSASVGDRVTITCQASQGISNYLAWYQQKPGKAPKLLIYYASTLQSG
VPSRFSGSGSGTEFTLTISSLQPEDFATYYCQQHNSNP
>V50RF-AQIB01144276.1-igkv |(56521, 56821)|3.0|(1.000,1.000,1.000)|1
ARCDIQMTQSPSSLSASVGDRVTITCQASQGISNYLAWYQQKPGKAPKPLIYKASTLESG
VPSRFSGSGSGTEFTLTISSLQPEDFATYYCQQRNSYP
>V51RF-AQIB01144282.1-igkv |(3113, 3400)|2.48225965808|(0.983,0.741,0.968)|1
TVVTQSPATLSLSPGERATVSCRTSQSVSNRLAWYQQKPGQAPRLLIYGASNRATGIPAR
FSGSGSGTDFTLTISSLELEDAAVYYCQQDNDWK
>V52RF-AQIB01144282.1-igkv |(46328, 46640)|2.9683601679|(0.995,0.991,0.983)|1
CNGDIVLTQSPASLAVSPGQKATITCRASESVSLFGINFIHWYQQKPGQPPKLLIYQASN
KDTGVPARFSGSGSGTDFTLTINPVEADDAANYYCLQSKTSP
>V53RF-AQIB01144282.1-igkv |(64268, 64559)|2.96755704207|(0.996,0.977,0.996)|1
IVLTQSPTSMAVSQGERVTISCTASSSISTSYLHWYQQKPGFPPRLLVYTTSSLASGVPA
RFSGSGSGTSYTLTISSMEAEDAANYYCQQGSSIP
>V54RF-AQIB01146109.1-igkv |(79026, 79336)|1.74875350943|(0.602,0.732,0.512)|1
SLSQPVLTQSPSASASLGASVKLTCTLSSGHSSYNIAWHQQQQGKAPRYLMRLNSDGSHS
KGDGIPDRFSGSSSGADRYLTISNLQSEDEADYYCHTWDTG
>V55RF-AQIB01146122.1-iglv |(12217, 12527)|2.97400040988|(0.995,0.980,1.000)|1
SWAEVVFTQPHSVSGSPGQTVTISCTRSSGSIDSSFVYWYQQRPGSAPTTVIYNDNRRPS
GVPDRFSGSIDSSSNSASLTISGLKSEDEADYYCQSDDSSG
>V56RF-AQIB01146122.1-iglv |(69507, 69814)|2.99798400013|(1.000,0.998,1.000)|1
SWAQSVLTQPPSVSGAPGQRVTISCTGSSSNIGGYNVHWYQQLPGTTPKLLIYGNNQRPS
GVSDRFSGSKSGTSASLTITGLQSEDEADYYCQSYDSSLS
>V57RF-AQIB01146122.1-iglv |(85423, 85724)|1.56692244732|(0.519,0.871,0.585)|1
SLSQPVLTQPPSASASLGASVTLTCTLSSGYSNYAVDWHQQRPGKGPQFVMRVGTGGIVG
SKGDGIPDRFSGSGSGLNRYLTIKNIQEEDESDYHCGA
>V58RF-AQIB01146122.1-iglv |(92188, 92498)|2.55455580216|(0.985,0.767,0.976)|1
SLSQPVLTQPTSLSASPGASARLTCTLRSGISVGSYRVLWYQQKPGNPPRYLLNYHTDSD
KDQGSGVPSRFSGSKDASANAGILLISGLQSEDEADYYCAI
>V59RF-AQIB01146122.1-iglv |(97013, 97322)|2.99696400065|(1.000,0.997,1.000)|1
CWAQSVLTQPPSASGAPGQSVTISCSGSSSNIGSNSVYWYQQFPGTAPKLLIYYSNQRPS
GVPDRFSGSKSGTSASLTISGLQSEDEADYYCAAWDDSLSG
>V60RF-AQIB01146122.1-iglv |(110604, 110914)|2.30021328572|(0.996,0.972,0.674)|1
SLSQPVLTQPASLSASPGASASLTCTFSGGINVAGYYIYWYQQKPGSPPRYLLRYKSDSE
KHQGSGVPSRFSGSKDASANTGILRISGLQSEDEADYYCAI
>V61RF-AQIB01146122.1-iglv |(126866, 127176)|2.90442445559|(0.986,0.946,0.979)|1
SLSQPVLTQPTSLSASPGASVRLTCTLRSGISVGGYNIHWYQQKPGSPPRYLLYYYSDSN
KGQGSGVPSRFSASKDASANAGILLISGFQSEDEADYYCTT
>V62RF-AQIB01146122.1-iglv |(131665, 131974)|2.99496000066|(0.999,1.000,0.996)|1
SWAQSVLTQPPSASGAPGQSVTISCSGSSSNIGSNYVSWYQQLSGKAPKLLIYKNSQRPS
GVPDRFSGSKSGTSASLTISGLRSEDEADYYCAAWDDSLNG
>V63RF-AQIB01146122.1-iglv |(149998, 150308)|2.97456084981|(1.000,0.994,0.982)|1
SLSQPVLTQPASLSASPGASARLSCTLSSGINVGSYSIYWYQQKPGSPPRYLLYYYSDSS
KGQGSGVPSRFSGSKDASANAGLLLISGLQSEDEADYYCAI
>V64RF-AQIB01146122.1-iglv |(159131, 159440)|2.99798400013|(1.000,1.000,0.998)|1
SWAQSVLTQPPSVSGAPGQRVTISCTGSSSNIGGYYVQWYQQLSGTAPKLLIYGNNQRPS
GVSDRFSGSKSGTSASLTITGLQSEDEADYYCETWDNSLNG
>V65RF-AQIB01146122.1-iglv |(164963, 165270)|2.96128218009|(0.976,0.998,0.990)|1
SWAQSVLTQPPSVSGAPGQRVTISCTGSSSNIGGYDVHWYQQLPGTTPKLLIYDNNKRPS
GVSDRFSGSKSGTSASLTITGLQTEDEADYFCQSYDSSLG
>V66RF-AQIB01146122.1-iglv |(187790, 188100)|2.82253770979|(0.998,0.972,0.896)|1
SLSQPVLTQPASLSASPGASASLTCTFSGGINVAGYYIYWYQQKPGSPPRYLLWYKSDSD
KHQGSGVPSRFSGSKDASANTGILRISGLQSEDEADYYCAI
>V67RF-AQIB01146123.1-iglv |(2181, 2490)|2.97554805197|(0.997,0.989,0.990)|1
SWAQSVLTQPRSASEATRKSITISCSGSSSNIGSNYVSWYQQLPGTAPKLLIYYNDWRAS
GVSDRFSGSKSGTSASLAISGLQTEDEADYYCAAWDDSLSG
>V68RF-AQIB01146133.1-iglv |(15765, 16070)|2.35124946755|(0.976,0.679,0.995)|1
SVASYELTQPPSVSVSPGQTAKITCSGDTLAKIYARWFQQKPGQAPVLVIYKDSERPSGI
PERFSGSSSGTTVTLTISGAQAEDEADYYCYSGDDNNLTV
>V69RF-AQIB01146133.1-iglv |(25439, 25742)|2.99899200002|(0.999,1.000,1.000)|1
SWAQSALTQSPSVSGSPGQSVTISCTGTSSDVGGYNYVSWYQQHPGKAPKLMIYEVSKRP
SGVSDRFSGSKSGNTASLTISGLQAEDEADYYCCSYTTS
>V70RF-AQIB01146133.1-iglv |(37913, 38216)|2.76876297038|(0.987,0.902,0.924)|1
SAASYDLTQPHSVSVSPGQTARITCGGDDIGSEAVHWYQQKPAQAPVLVIYDNSDRPSGI
PERFSGSNSGNTATLTISGVEAGDEADYYCQVWDISSDH
>V71RF-AQIB01146133.1-iglv |(45024, 45327)|2.07496894775|(0.974,0.756,0.730)|1
SVVSSELTQEPALSVALGHTVTMTCQGDSLSSYYASWYQQKPGQVPVLVIYGNTNRPSGI
SGRFSGSWSGNTASLTITGAQVEDEADYYCGSWDNSANH
>V72RF-AQIB01146135.1-iglv |(5642, 5953)|2.03101224441|(0.939,0.570,0.942)|1
SAASYELTQPPSVSVSPGQMARITCRGDSIGSKYVQWFQQKPAQAPVLVIYSDSKRPSGI
PERFSGSNSGNTATLTISGVQAGDEADYYCQVWDSSSKHATV
>V73RF-AQIB01146136.1-iglv |(1665, 1968)|2.99696400065|(1.000,0.997,1.000)|1
SWAQSAPTQPRSVSGSPGQSVTISCTGTSSDIGGYNYVSWYQQHPGTAPKLMIYGVSNRP
SGVSDRFSGSKSGNTASLTISGLQAEDEADYYCCSYTTS
>V74RF-AQIB01146137.1-iglv |(9886, 10183)|2.9849280013|(0.993,0.996,0.996)|1
SVASYELTQPPSVSVSPGQTARITCSGDVLKENYADWYQQKPGQAPVLLIYEDSKRPSGI
PERFSGSTSGDTTTLTISSTLSEDGADYYCFSGDENN
>V75RF-AQIB01146137.1-iglv |(18233, 18536)|2.76657138069|(1.000,0.869,0.968)|1
SAVSYELTQPRSVSVSPGQTARITCGGDSIGSKYVHWYQQKPAQAPVLVIYDNSNRPSGI
PERFSGSNSGNTATLTISGVQAGDEADYYCQVWDSSSKH
>V76RF-AQIB01146137.1-iglv |(25864, 26167)|2.99598000014|(0.999,1.000,0.997)|1
SVVSSELTQDPAVSVALGQTVRITCQGDSLRSSYASWYQQKPGQAPVLVVYGNNNRPSGI
PERFSGSSSGNTASLTITGAQVEDEADYYCNSWDSSGNH
>V77RF-AQIB01146138.1-iglv |(15714, 16017)|2.9909280013|(0.995,0.998,0.998)|1
SWAQAALTQPPSVSKSLGQSVTISCTGTSSDIAAYNDVSWYQQHPGTAPRLLIYSVSNRP
SGVSDCFSGSKSGNTASLTISGLQAEDEADYYCCSYRSG
>V78RF-AQIB01146138.1-iglv |(24129, 24432)|2.76657138069|(1.000,0.869,0.968)|1
SAVSYELTQPRSVSVSPGQTARITCGGDSIGSKYVHWYQQKPAQAPVLVIYDNSNRPSGI
PERFSGSNSGNTATLTISGVQAGDEADYYCQVWDSSSKH
>V79RF-AQIB01146140.1-iglv |(2757, 3067)|2.79598949566|(1.000,0.872,0.988)|1
SWAQAALTQPHSVSGSPGQSVTISCTGTSSDIGGYNRVSWYQQHPGKAPKLMIYEVSNRP
SGVSDRFSGSKSGNTASLTISGLQAEDEADYYCSSYASSSN
>V80RF-AQIB01146140.1-iglv |(26014, 26324)|2.99196000066|(0.998,0.999,0.995)|1
SWAQAALTQPPSVSGSPGQSVTISCTGTSSDVGGYNYVSWYQQHPGKAPKLMIYEVNKRP
SGVSDRFSGSKSGNTASLTISGLQAEDEADYYCSSYAGSNT
>V81RF-AQIB01146141.1-iglv |(2344, 2645)|2.9898400105|(0.998,0.992,1.000)|1
SVASYELTQPPSVSVSPGQTARITCSGDALPDNYAYWFQQKPGQSPVLIIYEDSKRPSGI
PERFSGSSSGTVATLTISGAQVEDEADYYCYSADSSGN
>V82RF-AQIB01146141.1-iglv |(10119, 10425)|1.82703657584|(0.927,0.513,0.889)|1
SVASYELTQPLSVSVALGQMARITCGGNNIGRKNVQWYQQKPDQAPVLVIYQDSKRPSGI
PERFSGSNSGNTATLTIDRAQAGDEADYYCQVWDSSTAHS
>V83RF-AQIB01146141.1-iglv |(13491, 13794)|2.99798400013|(1.000,0.998,1.000)|1
SWAQAAPTQSPSVSGSAGQSVTISCTGTSSDIGGYNRVSWYQQHPGKAPKLMIYEVSKRP
SGVSDRFSGSKSGNTASLTISGLQAEDEADYYCSSYAGS
>V84RF-AQIB01146141.1-iglv |(50602, 50912)|2.83656035716|(0.979,0.910,0.967)|1
SWAQSAPIQSPSVSGSLGQSVTISCTGTSSDIGRYNYVSWYRQQPGTTTKLTMYNVNTRP
SGVSDRFSGSKSGNTASLTISGLQAEDEADYYCSSYETSDT
>V85RF-AQIB01153480.1-ighv |(7301, 7610)|2.96261205453|(0.992,0.988,0.983)|1
VLSQLQLQESGPGLVKPSETLSLTCAVSGGSISSYWWGWIRQAPGKGLEWIGNIYGSGGS
TEYNPSLKSRVTISKDTSKNQFSLKLSSVTAADTAVYYCAR
>V86RF-AQIB01153481.1-ighv |(29869, 30184)|3.0|(1.000,1.000,1.000)|1
VQCEVQLVESGGGLIQPGGSLRLSCAASGFTFSDYAMSWVRQASGKGLEWVGYIRSKSNN
YATEYAASVKGRFTISRDDSKNTLYLQMSGLKTEDTAVYYCTI
>V87RF-AQIB01153482.1-ighv |(4668, 4983)|3.0|(1.000,1.000,1.000)|1
VQCEVQLVESGGGLVQPGGSLRLSCAASGFTFSDHYMQWVRQAPGKGLEWVGFIRSKAYG
GTAEYAASVKGRFTISRDDSKSITSLQMNSLKTEDTAVYYCTR
>V88RF-AQIB01153482.1-ighv |(18678, 18987)|3.0|(1.000,1.000,1.000)|1
VQCEVQLVESGGGLVQPGGSLKLSCAASGFTFGDYAMSWVRQAPGKGLEWVSSISNTGKT
TYYADSVKGRFTISRDNAKNSLSLQMNSLRAEDTAVYYCAR
>V89RF-AQIB01153482.1-ighv |(23774, 24083)|2.78259051477|(0.999,0.859,1.000)|1
VQGEVQLVESGGGLAKPGGSLRLSCAASGFTFSNYYMHWVRQAPGKGLEWVSSINTGGGS
TYYADSVKGRFTISRDNSKNTLSLQMDSLRAEDTAVYYCAK
>V90RF-AQIB01153484.1-ighv |(24203, 24512)|2.26541477313|(0.761,0.709,0.820)|1
AQSQVQLVQPGAEMRKPGDSVKVSCKASGYTFTNHDVDWVRQAPGQGPEWMGGINTNTGG
TSCAQTFQGRVTMTRDTTTSTAFMELSSLRSEDTAVYYCAR
>V91RF-AQIB01153484.1-ighv |(33458, 33767)|2.76346990442|(0.957,0.987,0.860)|1
AHSQVQLVQSGAEIKQPGASVKLSCKASGYTFTSYYMHWVRQAPGQGLEWIGLISPYNGN
KGYAQNFQGRVTITTDTSTSTGYMELSSLRSEDTAVYYCTR
>V92RF-AQIB01153485.1-ighv |(161, 470)|2.78767053933|(0.944,0.875,1.000)|1
VQGEVQLVESGGGLAKPGGSLRLSCAASGFTFSDYHMHWVRQAPGKGLQWVSAINSGGGS
TWYADSVKGRFTISRENAKNTLYLQMDSLRAEDTAVYYCAK
>V93RF-AQIB01153486.1-ighv |(413, 728)|2.99798400013|(1.000,0.998,1.000)|1
VQCEVQLVESGGGLVQPGGSLRLSCAASGFTFSDYAMHWVRQAPGKGPEWVGFIRSKAYG
GTAEYAASVKGRFTISRDDSKNTAYLQMNSLKTEDTAVYYCTI
>V94RF-AQIB01153489.1-ighv |(27642, 27951)|2.71085161002|(0.944,0.950,0.851)|1
AHSEVQLVQSGAEVRKPGASVKVSCKVSGYTLTELSMHWVRQAPGKGLEWMGGVDPVYGE
TIHAEKFQGRVTMTEDTSTDTAYMELSSLRSEDTAVYYCAR
>V95RF-AQIB01153491.1-ighv |(2235, 2549)|1.60576770864|(0.929,0.693,0.576)|1
VLSQVTLKESGPALVKPTQTLTLTCTFSGFSLTTSGMGVGWIRQPPGKALEWLAHIYWDD
DKRYSPSLKSRLTISKDTSKNQVVLTMTNMDPVDTATYYCARR
>V96RF-AQIB01153491.1-ighv |(11513, 11822)|2.49806193839|(0.942,0.961,0.743)|1
VHSQVQLVQSGAEVKKPGASVKLSCKASGFTLGSYAISWVRQAPGQGLEWMGGIIPLVGI
TNYAQKFQGRVTITADTSTTTAYMELSSLRSEDTAVYYCAR
>V97RF-AQIB01153491.1-ighv |(20597, 20906)|2.3114643416|(0.831,0.989,0.677)|1
AHSQVQLVQSGAEVEKPGASVKVSCKATGYTFTNYFMQWVRQAPGQGLEWMGWVYLGNGN
TNYVQKFQGRVTMTRDVSTNTAYMELGSLRSKDMAVYYCAR
>V98RF-AQIB01153492.1-ighv |(6792, 7104)|2.99598000014|(0.999,1.000,0.997)|1
VLSQVQLQESGPGLVKPSETLSLTCAVSGGSISSSYWSWIRQSPGKGLEWIGDIYGSSGG
STSYNPSLKSRVTMSVDTSKNQFSLKLSSVTAADTAVYYCAR
>V99RF-AQIB01153498.1-ighv |(778, 1087)|2.68004142764|(0.997,0.999,0.812)|1
AHSQVQLVQSGAEVKKPGSSVKVSCKASGYTFTDYYMQWVRQAPGQGLEWMGRINPKTGG
TDYAQKFQGRVTMTRDTSTSTAYMELSSLRSEDTAVYYCAR
>V100RF-AQIB01153501.1-ighv |(4567, 4876)|3.0|(1.000,1.000,1.000)|1
VQCEVQLVESGGGLVQPGASLRLSCAASGFTFGDYAMSWVRQAPGKGLEWVSYISSASST
IYYADSVKGRFTISRDNAKNSLYLQMNSLKTEDTAVYYCTR
>V101RF-AQIB01153501.1-ighv |(18760, 19071)|2.9454900387|(0.986,0.964,0.998)|1
VQCEVQLVESGGGVVQPEGSLRLSCAASRFTFDDYAMSWVRQAPGKGLEWVSVISWTRRS
TYYADSVKGRFTISRDNTKNSLYLQMDRLRAEDTALYYCAKD
>V102RF-AQIB01153504.1-ighv |(6983, 7290)|2.48308050934|(0.788,0.884,0.882)|1
AHSQVQLVLSRAEVEKPGASVKVSCKASGYTFTSYFMQWVGQAPGQGREWMGWVYLGNGN
TNYEQKFQGRVTITRDVSTSTTYMELSTLRSEDMAVYYCA
>V103RF-AQIB01153506.1-ighv |(6406, 6713)|2.48308050934|(0.788,0.884,0.882)|1
AHSQVQLVLSRAEVEKPGASVKVSCKASGYTFTSYFMQWVGQAPGQGREWMGWVYLGNGN
TNYEQKFQGRVTITRDVSTSTTYMELSTLRSEDMAVYYCA
>V104RF-AQIB01153507.1-ighv |(14778, 15088)|2.59964641897|(0.976,0.984,0.781)|1
ALSQVQLQESGPGVVKPSETLSLTCAVSGYSISSGYYWGWIRQPPGKGLEWIGSIYGSGG
SNYLNPSLKSRVTLSVDTSKNQFSLKLSSVTATDTAVYYCA
>V105RF-AQIB01153507.1-ighv |(24714, 25023)|3.0|(1.000,1.000,1.000)|1
VQCEVQLVESGGGLVQPGGSLRLSCAASGFTFSSYWMHWVRQAPGKGLEWVSLINSDGGS
TRYADSVKGRFTISSENAKNSLYLQMNSLRAEDTAVYYCAR
>V106RF-AQIB01153507.1-ighv |(32453, 32768)|2.99899200002|(0.999,1.000,1.000)|1
VQCEVQLVQSGGGLVQPGGSLRLSCAASGFTFSEYAMAWVRQASGKGLEWVGRIRSKSNN
YGTAYAASVKGSFTISRDDSKNTLYLQMSSLKTEDTAVYYCTR
>V107RF-AQIB01153507.1-ighv |(42168, 42483)|2.97195641525|(0.994,1.000,0.979)|1
VQCEVQLVESGGGLVQPGGSLKLSCAASGFTFSNYYMDWVRQAPGKGLEWVGRIRNKANS
HTTEYAASVKDRFTISRDDSKNTLYLQMSGLKTEDKAVYYCAR
>V108RF-AQIB01153509.1-ighv |(6082, 6394)|2.99799200002|(1.000,0.999,0.999)|1
VQCEVQLVESGAGLVQPGGSLRLSCAASGFTFSDYYMDWVRQAPGKGLEWVSRISSGSGS
STYYPDSVKGRFTISRDNSKNTLYLQMNSLRAEDTAVYYCAR
>V109RF-AQIB01153509.1-ighv |(13578, 13893)|2.96037047288|(0.997,0.967,1.000)|1
VQCEVQLVESGGGLVQPGGSLRLSCAASGFTFSNHYMHWVRQAPGKGQEWVGFIRNKANG
GTAEYAASVKGRFTISRDDSKSITSLQMNSLKTEDTAVYYCTR
>V110RF-AQIB01153509.1-ighv |(29997, 30306)|3.0|(1.000,1.000,1.000)|1
VQCEVQLVESGGGLVQPGGSLRLSCAASGFTFGDYDMSWVRQAPGKGLEWVSFISYTGKT
TYYADSVKGRFTISRDNAKNSLSLQMNSLRAEDTAVYYCTR
>V111RF-AQIB01153509.1-ighv |(39117, 39410)|1.74475257864|(0.598,0.936,0.579)|1
VQCEVQLVESGGGLVQPGGSLRLSCGASGFTFSDHYMDWVRQAPGKGLEWVSSISTGSGS
TTLYPDSVKGRFTISRDNAKNTLYLQMNSLRADVFS
>V112RF-AQIB01153509.1-ighv |(45356, 45665)|2.95020796184|(0.999,0.974,0.981)|1
AHSEVQLVQSGAEVKKPGASVNVSCKASGYTFTDYYLHWVRQAPGKGLEWMGRIDPENGE
SKYAQKFQDRLTMTADTSTDTAYMELSSLRSEDTAVYYCAT
>V113RF-AQIB01153511.1-ighv |(7980, 8295)|2.99799600001|(0.999,0.999,1.000)|1
VQCEVQLVESGRGLVQPGGSLRLSCAVSGFTFSDHYMSWVREAPGKGLEWVGFMRNKANG
GRTEYAASVKGRFTISRDDSKSIASLQMSSLKTEDTAVYYCAR
>V114RF-AQIB01153511.1-ighv |(11094, 11404)|2.98851611711|(1.000,1.000,0.989)|1
VQCEVQLVESGGGLVQPGGSLRLSCVASGFTFSDHYMDWVRQAPGKGLEWVSSISTGSGS
TTLYPDSVKGRFTISRDNAKNTLYLQMNSLRADDTAVYYCA
>V115RF-AQIB01153511.1-ighv |(40798, 41107)|2.9969280013|(0.997,1.000,1.000)|1
VQCEVQLVESGGGLAKPGGSLRLSCAASGFTFSSYGMHWVRQAPGKGLEWISAINSGGSN
TWYTDSVKGRFTISRDNSKNTLSLQMNSLRAEDTAVYYCAK
>V116RF-AQIB01153517.1-ighv |(601, 913)|2.9659815877|(0.999,0.978,0.991)|1
VLSQVQLQQWGGGLVKPSETLSLTCAVYGGSISGYYYWSWIRQPPGKGLEWIGNIDGNSG
STNYNPSLKSRVTISKDTSKNQFSLKLSSVTAADTAVYYCAR
>V117RF-AQIB01153522.1-ighv |(387, 699)|2.76153172754|(0.913,0.895,0.966)|1
VLSQVQLQESGPGLLKPSETLSLTCAVSGGSISGGYGWGWIRQPPGKGLEWIGSIYTSSG
NTYYNPSLKSRVTISTDTSNNQFSLKLNSVTAADTAVYYCAR
>V118RF-AQIB01153537.1-ighv |(1707, 2018)|2.98432022844|(0.999,1.000,0.986)|1
VQCEVQLVESGGGVVQPGGSLRLSCAASGFTFDDYGMHWVRQAPGKGLEWVSDISWDGDS
TYYADSVKGRFTISRDDAKNSLYLQMDSLRAEDTALYYCAKD
>V119RF-AQIB01153538.1-ighv |(4311, 4620)|2.991900005|(0.999,0.999,0.994)|1
AQSQVQLVQSGAEVKKPGASVKLSCKASGYTFTSYNINWVRQAPGQVLEWMGWINPSNGN
TGYAQKFQGRVTMTRDTSTSTAYMELSSLISEDTAVYYCAR
>V120RF-AQIB01153538.1-ighv |(21429, 21738)|2.46948052764|(0.949,0.911,0.755)|1
AHSQVQLVQSGVEVKKPGASVKVSCKASGYTFSIYAISWVRQAPGQGLEWMGAIIPLVGI
TNYAQKFQGRVTITADTSTSTAYMELSSLRSEDTAVYYCAR
>V121RF-AQIB01153538.1-ighv |(31031, 31340)|2.44339857711|(0.935,0.762,0.874)|1
AHSQVQLVQSGAEGKKPGSSVKVSCKASGYTFTNSAVQWVRQSPEQGLEWIGVIIIGNDN
TGYAQKFQGRVTITMDVSMSTAYVELSSLRSEDMAVYYCAA
>V122RF-AQIB01153541.1-ighv |(19819, 20128)|2.51335577262|(0.903,0.750,0.965)|1
AHSQEQLVQSGAEVKKPGASVKVSCKASGYIFTGYIISWLRQAPGQGFEWMGGINPSDGS
TSYAQKFQGRVTMTRDTSTSTVYVELSSLRSEDTAVYYCAA
>V123RF-AQIB01153541.1-ighv |(23910, 24219)|2.95426883377|(0.987,0.970,0.999)|1
AHSEMQLVQSEAEVKKPGASVKVSCKVSGYTFTYPYLHWVRQTPGQGLEWMGWITPYNGN
TNYAQKFQDRVTITRDRSMSTAYMELSSLRSEDTAVYYCAR
>V124RF-AQIB01153543.1-ighv |(7057, 7368)|2.99593600205|(1.000,1.000,0.996)|1
VQCEVQLVESGGGVVQPGGSLRLSCAASGFTFDDYAMGWVRQAPGKGLEWVSGISWNSGS
TGYADSVKGRFTISRDNAKNSLYLQMNRLRAEDTALYYCAKD
>V125RF-AQIB01153550.1-ighv |(2975, 3287)|2.75105988529|(0.876,0.968,1.000)|1
VLSQVQLQESGPGLVKPSETLSLTCAVSGYSISSAYDWSWIRQPPGKGLELIGYIYGNSA
STSYNPSLKSRVTISKDTSKNQFSLKLSSVTAADTAVYYCAR
>V126RF-AQIB01153553.1-ighv |(7961, 8270)|2.99598000014|(0.999,0.997,1.000)|1
VQGEVQLVESGGGLAKPGGSLRLSCSASGFTFSDYYMHWVRQASGKGLEWVSRINTGGGS
TWYADSVKGRFTISRENAKNTLYLQMDSLRAEDTAVYYCAR
>V127RF-AQIB01153553.1-ighv |(15671, 15986)|2.97694052476|(0.997,1.000,0.981)|1
VKCEAQLMESGGGLVQPGGSLRLSCAASGFTFSDHYMQWVRQAPGKGLEWVGLIRNKVDG
ETTDYAASVKGRVTISRDESKSITYLQMNNLKTEDTAVYYCAR
>V128RF-AQIB01153553.1-ighv |(22330, 22639)|2.94082233718|(0.999,0.951,1.000)|1
VQGEVQLVESGGGLVQPGGSLRLSCAASGFTFSSYAMHWARQAPGKGLEWVSYISSGGGN
TYYADSVKGRFTISRDNSKNTLSLQMNSLRAEDTAVYYCAR
>V129RF-AQIB01153555.1-ighv |(4669, 4978)|2.23814657075|(0.970,0.976,0.642)|1
VCAEVQLVQSGAEVKRPGESLRISCKTSGYSFTSSWISWVRQMPGKGLEWMGRIYPGDSD
TEYSPSFQGQVTISADKSISTTYLQWSSLKASDTATYYCAK
>V130RF-AQIB01153555.1-ighv |(23903, 24218)|2.99899200002|(0.999,1.000,1.000)|1
VQCEVQLVESGGGLVQPGGSLRLSCAASGFTFSDHYMDWVRQAPGKGLKWVGRIRNKANS
YTTEYAASVKGRFTISRDDSKNTLYLQMSSLKTEDTAVYYCTR
>V131RF-AQIB01153555.1-ighv |(39959, 40271)|2.25689975143|(0.992,0.994,0.648)|1
VQCEVQLVESGGGLVQPEGSLRLSCVASGFTFSNYDMAWVRQAPGKGLEWVSRISSPSGS
STYYPDSVKGRFTISRENAKNTLYLQMNSLRAEDTAVYYCAR
>V132RF-AQIB01153556.1-ighv |(2509, 2815)|2.21728654707|(0.857,0.628,0.999)|1
VQCEVQLVEYGGGLVQPGGSLRHSCGFTFSDHYMSWVHPAPGKGLEWVGFMRNKANGGRT
EYAASVKGRFTISRDDSKSIASLQMSSLNTEDTVLYYCAR
>V133RF-AQIB01153557.1-ighv |(2988, 3297)|3.0|(1.000,1.000,1.000)|1
VQCEVQLVESGGGLVQPGGSLRLSCAASGFTFSDYWMYWVRQAPGKGLEWVSRISGSSSS
TYYPDSVKGRFTISRDNAKNTLYLQMDSLRAEDTAVYYCAR
>V134RF-AQIB01153557.1-ighv |(15135, 15441)|2.98153608204|(0.996,0.986,1.000)|1
VQCEVQLVESGGGLVQPGGTLRLSCAASGFTFGNSDLIWIRQAPGKGLEWVSYISSGGST
YYSDSVKGRFTISRENAKNTLYLQMSSLRVEDTAVYYCVR
>V135RF-AQIB01153558.1-ighv |(4802, 5117)|2.99696400065|(1.000,1.000,0.997)|1
VQCEVQLVESGGGLVQPGGSLRLSCAASGFTFSNSWMSWVRQAPGKGLEWVARIKSKADG
GTAEYAASVKGRFTISRDDSKNTLYLQMNSLKTEDTAVYYCTI
>V136RF-AQIB01153561.1-ighv |(995, 1304)|2.59150062476|(0.950,0.882,0.832)|1
VQCEVQPVESGGGLVQPGGSLRLSCTASGFTFSSTRMNWIRQSPGKRLEWVADIKYDGSE
KYYVDSVKGRFTISRDNAKNSLYLQMNSLRAEDTAVYYCVR
>V137RF-AQIB01153564.1-ighv |(5745, 6054)|2.33930992553|(0.965,0.914,0.706)|1
VSAEVQLVQSGAEVKRPGESLKISCKTSGYSFTSYWISWVRQIPGKGLEWIGTIYPSDSD
TRYSPSFQGQVTISADKSISTAYLQWSSLKASDTATYYCAK
>V138RF-AQIB01153565.1-ighv |(7316, 7625)|2.6109574184|(0.965,0.954,0.798)|1
VCAEVQLVQSGAEVKKPGESLKISCKTSGYSFTSYWISWVRQIPGKGLEWIGAIDPSDSD
TRYSPSFQGQVTISADKSISTAYLQWSSLKSSDTATYYCAK
>V139RF-AQIB01153566.1-ighv |(30566, 30881)|2.99371202074|(0.994,1.000,1.000)|1
VQCEVQLVESGGGLVQPGGTLRLSCAASGFTFSNYWMDWVRQAPGKGLEWVGFIKNKADG
GTAEYAASVKGRFTISRDDSKNTLYLQMNSLKTEDTAVYYCTR
>V140RF-AQIB01156901.1-igkv |(3348, 3648)|2.99899600001|(1.000,0.999,1.000)|1
AKCDIQMTQSPSSLSASVGDKVTITCQASQSISSWLAWYQQKPGKAPKLLIYKASSLESG
VPSRFSGSGSGTDFTLTISSLQPEDFATYYCQQHNSAP
>V141RF-AQIB01158310.1-igkv |(1186, 1501)|2.95149304411|(0.992,0.988,0.973)|1
TSGDIVMTQTPLSLPVTPGEPASISCRSSQSLLHSNGYTYLNWYLQKPGQSPLLLIYLVS
NRASGVPDRFSGSGSGTDFTLKISRVEAEDVGVYYCMQDIKLP
>V142RF-AQIB01162308.1-trbv |(21269, 21567)|2.42822431193|(0.889,0.804,0.797)|1
TQTPSHQVTQMGQEVILRCVPIPNHLYFYWYRQILGQKVEFLVIFFDNNISEKSEIFDDR
FSVGRPDGSDFTLKIKSTKLEDSAMYFCASSEATALQ
>V143RF-AQIB01162311.1-trbv |(7799, 8097)|2.00713862905|(0.937,0.933,0.564)|1
TQTPSHQVTQMGQEVILRCVPIPNHLNFYWYRQILGQKVEFLVYFYNDKILEKSEIFDDR
FSVERPDGSNFTLKIKSTKLEDSATYFCASSEATALQ
>V144RF-AQIB01162311.1-trbv |(11768, 12065)|2.98470402421|(0.999,0.994,0.992)|1
SLDTAVSQTPKYLVTQMGKKVSLKCEQNLGHDTMYWYKQDSKKLLKIMFSYNNKELTINE
TVSTRFSPESPDKAHLILHIKSLELGDSAVYFCASSQ
>V145RF-AQIB01162312.1-trbv |(4219, 4516)|2.994900005|(1.000,1.000,0.995)|1
PTDTGVTQTPKHLVMGMTNKKSLKCEQHLGHNAMYWYKQKAKKPPELMFVYQYEKLSINE
SVPSRFSPECSKSSLLYLHLQALQPEDSALYLCASSQ
>V146RF-AQIB01162312.1-trbv |(12163, 12454)|2.25967385137|(0.844,0.766,0.727)|1
PEVTQTPSHQVTQMGQEVILWCVPISNHFYFYWYRQILGQKVEFLVYFYNGEISEKSEIF
DDRFSVGRSDGVHFTLKIKSTKLEDSATYFCASSE
>V147RF-AQIB01162312.1-trbv |(18644, 18941)|2.43340721488|(0.972,0.952,0.726)|1
PLDTAVFQTPKYLVTQMGKKVSLKCEQNLGHDTMYWYKQDSKKLLKIMFIYSNEEPILNE
TVPNRFSPESLGKAHLNLHIKPVELGDSAVYFCASSQ
>V148RF-AQIB01162312.1-trbv |(22989, 23286)|2.99280401921|(1.000,1.000,0.993)|1
PTDTGVTQTPKHLVMGMTNKKSLKCEQHLGHNAMYWYKQKAKKPPELMFVYNYEKLSINE
SVPSRFSPECSKSSLLYLHLRALQPEDSALYLCASSQ
>V149RF-AQIB01162312.1-trbv |(33931, 34221)|2.6455028039|(0.926,0.859,0.885)|1
EAGVTQTPRSLIKMRGQQVTLSCSPISGHRSVSWYQQTPGQGLQLLFEYFSETQRQKGNF
PNRFSGRQFSNSHSEMNVSTLELGDSALYLCASSL
>V150RF-AQIB01162312.1-trbv |(41443, 41740)|2.99496000066|(0.999,0.996,1.000)|1
PANADVTQSPKFQILKTGQNMTLKCAQDMNHNSMYWYRQDPGMGLRLIHYSATEDTTDTG
EVPDGYSVSRLNKKEFLLRLESAAPSQTSVYFCASSE
>V151RF-AQIB01162312.1-trbv |(55583, 55896)|2.98886400565|(0.997,1.000,0.992)|1
SLDTAVSQTPKYLVTQTGKNESLKCEQNLGHNAMYWYKQDSKKLLKIMFIYSNKEPVLNE
TVPNRFSPKSPDKAHLNLYITSVELGDSAVYFCASSQDTALQ
>V152RF-AQIB01162312.1-trbv |(59013, 59310)|2.99193200206|(0.999,0.998,0.995)|1
PMETGVTQTPRHLVMGMTNKKSLKCEQHLGHNAMYWYKQKAKKPPELMFIYNFKERAENN
SVPSRFSPECPDSSLLYLHLRALQPEDSALYLCASSQ
>V153RF-AQIB01162312.1-trbv |(70730, 71027)|2.98594800078|(0.995,0.998,0.993)|1
PVNAGVTQTPKFQILKTGQNMTLKCAQDMNHDRMYWYRQDTGMGLRLIHYSVGEGNTEKG
EVPSGYNASRLNKKDFLLRLELAAPSQTSIYFCASSE
>V154RF-AQIB01162312.1-trbv |(74325, 74625)|2.83176541579|(0.959,0.923,0.955)|1
HTDAGVSQSPRNKVTEEGKDVVLRCDPISGHIALYWYRQSLGKGLEFLIFFQGNDAPDKS
GLPSGRFSAERLEGSVSTLKIQRTQQGDSAVYLCASSS
>V155RF-AQIB01162313.1-trbv |(10114, 10411)|2.99192000218|(0.998,0.994,1.000)|1
HTGAGVSQSPSNKVTEKGNVALRCDPISGHAVLYWYRQNLGQGLEFLIYFQGTSAVDDSG
LRSDRFSATRPEGSVSTLKIQRTEQGDSATYFCASSL
>V156RF-AQIB01162313.1-trbv |(15115, 15427)|2.36230815269|(0.879,0.734,0.837)|1
PVDTGVTQSPTHLIKTRGQQVTLRCSPISGHTSVSWYQQAPGQGPQFIFKYANELRTSEG
NFPHRFSGRQFRDYHSEMNVSALELGDSALYLCASSLAQPGR
>V157RF-AQIB01162313.1-trbv |(17798, 18094)|2.96308424741|(0.998,0.997,0.971)|1
SVDSGVTQTPKHLITAIGQQVTLRCSPRSGDLSVYWYQQSLGQGLQFLIQYYNGAERAKG
NILERFSAQQFPDLHSELNLSSLELGDSALYFCASSL
>V158RF-AQIB01162314.1-trbv |(7361, 7658)|2.00232957831|(0.898,0.548,0.958)|1
HRDAEITQSPRHKITETGRQVTLKCHQTWNHNNMFWYRQDLGHGLRLIHYSYGVPDTNKG
EVPDGYSVSRSNEEDFPLTLESAASSQTSVYFCASSE
>V159RF-AQIB01162314.1-trbv |(17013, 17304)|2.33693419613|(0.934,0.817,0.757)|1
AGVAQSPRYKITEKSQAVAFWCDPISGHATLYWYRQILGQGPELLVQFQNDGVVDDSQLP
KDRFSAERLKGVNSTLRIQPAELGDSAMYLCASSL
>V160RF-AQIB01162316.1-trbv |(5792, 6099)|2.00299811982|(0.881,0.547,0.959)|1
HRDAGITQSPRYKVTEIGRQVTLTCHQTWNHSNMFWYRQDLGHGLNLIYYSAGASITDKG
EVPDGYAVSRSKTEDFPLTLESATRSQTSVYFCASSESTV
>V161RF-AQIB01162317.1-trbv |(23070, 23367)|2.99194800078|(0.997,1.000,0.995)|1
PVNAGVTQTPKFQVLKTGQSMTLQCAQDMNHDCMYWYRQDPGMGLRLIHYSFGKGSTDKG
EVPDGYNVTRSSTEDFTLRLESAAPSQTSVYFCASSY
>V162RF-AQIB01162317.1-trbv |(27290, 27591)|2.40197635327|(0.871,0.783,0.799)|1
AGVSQSPRYRVTKRGQDVALRCDPISGHDYLYWYQQAPGQGPAFLTYFQNDAQRDKSGLP
NDRFSAERPEGSLSTLKIQRTQQGDSAVYLCASSLATV
>V163RF-AQIB01162317.1-trbv |(35256, 35552)|2.95410021834|(0.992,0.980,0.983)|1
PVQAGVTQSPTHLIKTRGQQVTLRCSPISGHSSVYWYQQALGQGLQFILSYDEEEERDRG
TFPHRFSGHQFPNYSSELNVNASEVGDSALYLCASSL
>V164RF-AQIB01162317.1-trbv |(46598, 46898)|2.98686400565|(0.995,0.992,1.000)|1
HTGAGVSQSPSYKVTKRGQDVALRCDPISGHVALYWYRRTLGQGPELLTYFQNDAQPDKS
GLPSDRFSAERPEGSVSTLKIQRTQQGDSAVYLCASSL
>V165RF-AQIB01162318.1-trbv |(2955, 3251)|2.99396400065|(0.999,0.996,0.999)|1
NAGVTQTPKFQVLKTGQSMTVQCAQDMNHDYMFWYRQDPGMGLRLIHYSGAAGTTDKGEV
PSGYNVSRLNTEDFPLRLESAAPSQTSVYFCASSYST
>V166RF-AQIB01162319.1-trbv |(8580, 8876)|2.26801223062|(0.989,0.923,0.684)|1
PVDAGVTQSPTHLIKMRGQQVTLRCSPISGHNTVSWYQQALGQGPQFIFQYYEKEEREKG
NFPGRFSGHQFPNYSSELNVNASEMGDSALYLCASSL
>V167RF-AQIB01162319.1-trbv |(20234, 20534)|1.85265807571|(0.657,0.975,0.578)|1
HTGAGVSQSPRYKVTKRGQDVALRCDPISGHEALYWYQQAPGQGPELLTYFNYKAQPDKS
GLPNDRFSAERPEGSFSTLTIQRTEQRDSAVYLRASSL
>V168RF-AQIB01162319.1-trbv |(25283, 25579)|2.35285902909|(0.994,0.994,0.684)|1
PVDAGVTQSPTHLIKTRGQQVTLRCSPISGHTSVSWYQQALGQGPQLIFQYYEKEEREKG
NFPGRFSGHQFPNYSSELNVNASEMGDSALYLCASSL
>V169RF-AQIB01162319.1-trbv |(33229, 33529)|2.35884544923|(0.982,0.717,0.920)|1
HTGAGVSQSPRYRVTKRGQEVAFRCDPISGHEYLYWYQQAPGQGPEFLTYFQNDAQLDKS
GLPSGRFSAERPEGSVSTLKIQRTQQGDSAMYLCASSL
>V170RF-AQIB01162319.1-trbv |(42071, 42367)|1.67285733671|(0.945,0.643,0.663)|1
PVEPGVTQSPTHLIKTRGQQVILRCSPISGHSSVSWYQQSLGQGPQFIFEHYEKEERGRG
NFPGRFSGRQFPNYSSELNVSALLLGDSALYLCASSL
>V171RF-AQIB01162319.1-trbv |(49518, 49833)|2.49232617902|(0.911,0.742,0.955)|1
LFLSAGPGNADVTQTPKFQLLKTGQSLTLQCAQDMNYNYMFWYRQDPGVGLRRIHYSVAA
GITDKGEVPNGYNVSRLNREDFPLRLESAALSQTSVYFCASSD
>V172RF-AQIB01162320.1-trbv |(3376, 3672)|2.99288400513|(1.000,0.998,0.995)|1
PVDTGVTQSPTHLIKMRGQQVTLRCSPISGHSSVYWYQQALGQGPQFIFQYYEKEERGRG
NFPDRFSGHQFPNYSSELNVSALLLGDSALYLCASSL
>V173RF-AQIB01162320.1-trbv |(10674, 10965)|2.97470483945|(0.998,0.998,0.980)|1
NAGVTQTPKFQVLKTGQSMIVQCAQNMNHDYMFWYRQDPGMGLRLIYYSVTAGITTKGEV
PNGYNVSRRNTEDFLLRLESAALSQTSVYFCASSY
>V174RF-AQIB01162320.1-trbv |(14920, 15220)|2.99194800078|(0.997,1.000,0.995)|1
HTGAGVSQSPRYKVIKKGQDVALRCDPISGHAALYWYQQALGQGPEFLTYFNYKDQPDKS
GLPNNRFSAERPEGSFSTLTIQRTEQQDSAVYLCASSL
>V175RF-AQIB01162320.1-trbv |(23602, 23892)|2.42094020928|(0.952,0.735,0.912)|1
DAGVTQSPMHLIKTRGQQVTLRCFPISGHNTVSWYQQTLGQGPQLIFQYYREEERGKGNF
PDRFSGRQFPNYSSELNVSALLLGDSALYLCASSL
>V176RF-AQIB01162320.1-trbv |(46876, 47173)|2.98660004313|(0.991,0.999,0.997)|1
HMDARITQSPRHKITETGTPVTLRCHQTENHRYMYWYRQDLGHGLRLIHYSYGVEDTDKV
EVSDGYSVSRSKTEDFLLTLESATRSQTSVYLCASSE
>V177RF-AQIB01162320.1-trbv |(57872, 58160)|1.97310105933|(0.947,0.636,0.797)|1
GVTQSPRYKITEKKQPVAFWCNPISGHNTLYWYRQNLGQGPELLVRYENEEAVDDSQLPK
DRFSAERLKGVDSTLRIQPAELGDSAVYLCASSL
>V178RF-AQIB01162320.1-trbv |(63466, 63766)|2.54984324547|(0.926,0.787,0.912)|1
HTDAGVIQSPRHEVTEMGKEVTLRCEPISGHNSLFWYRQTMMRGLEFLIYFNNKSPIDDS
GMPKDRFSAKMPNASFSTLKIQPSEPRDSAVYFCASSL
>V179RF-AQIB01162320.1-trbv |(66748, 67048)|2.55768548976|(0.878,0.814,0.882)|1
HTDAGVIQSPRHEVIEMGKEVTLRCEPISGHTYLFWYRQTMMRGLEFLIYFNNKSPIDDS
GMPKDRFSAEMPEASFSILKIQPSEPRDSAVYFCASSL
>V180RF-AQIB01162320.1-trbv |(82427, 82727)|2.28236288146|(0.852,0.934,0.660)|1
LIDAGVTQTPRHKVTEMGQEVTMRCQPILGHNTIFWYRQTMMRGLEFLIYFNNKSPIDDS
GMPKDRFSAEMPNASLATLKIQPSEPRDSAVYLCASGL
>V181RF-AQIB01162320.1-trbv |(89350, 89651)|2.40994666249|(0.935,0.898,0.733)|1
AGVTQFPSHRVIEKGQAVTLRCEPISGHDYLYWYRRVMGKELKFLIYFLRASMQDEFGMP
NKRFSAERTGGTYSTLKVQPAELEDSGVYFCASSQDTV
>V182RF-AQIB01162320.1-trbv |(94443, 94740)|1.70723503797|(0.879,0.638,0.625)|1
HGDVMVIQNPRYQVTQLGKPVTLSCSQNLNHRVMYWYQQKPSHAPKLLFHYYDKDFNNEA
DTPDNFQSRRPNTSFCFLDISSPGLEDAAVYLCASSK
>V183RF-AQIB01162320.1-trbv |(99411, 99711)|2.50977613807|(0.947,0.872,0.798)|1
SPGEEVTQTPKHLVKGEGQKAKLYCAPITGHSYVFWYQQVLRKEFKFLISFQNKNVFDET
GMPKERFSAKCPPNSPCSLEIQATKLKDSAVYFCASSQ
>V184RF-AQIB01162321.1-trbv |(2362, 2659)|2.98974003277|(0.999,1.000,0.991)|1
TVDGGITQSPKYLFRKEGQNVTLSCEQNLNHDAMYWYRQDPGQGLRLIYYSQTVNDIQKG
DTAEGYSVSRERKQSFPLTVTSAQRNPTAFYLCASSI
>V185RF-AQIB01162321.1-trbv |(20388, 20688)|2.93414531208|(0.988,0.968,0.980)|1
STDTKVTQRPRLLVKANEQKAKMDCVPVKGHSYVYWYRKKLDEELKFLIYFQNEEIIQKA
EIINERFSAQCPQNSPCTLEIQSTESGDAALYFCASSK
>V186RF-AQIB01162321.1-trbv |(29352, 29657)|2.96950011724|(0.993,0.995,0.982)|1
SFHAEVTQTPGYLVKGKGQKTKMDCTPEKGHTFVYWYQQNQNKEFTFLISFQNEQVLQET
ELHKKRFSSQCPKNPPCSLEIPSSEPGDTALYLCASSQST
>V187RF-AQIB01162321.1-trbv |(41537, 41835)|2.89216849053|(0.988,0.989,0.929)|1
SMDADVTQTPRNKIAKTGKRIMLECSQTKSHDRMYWYRQDPGLGLRLIYYSFDVKDINKG
EISDGYNVSRQEQAKFSLSLESATPNQTALYFCATSD
>V188RF-AQIB01162321.1-trbv |(50021, 50318)|2.98693600205|(0.997,0.993,0.997)|1
LMEADIYQNPRHCVIGTGKKITLECSQTMGHDKMYWYQQDPGMELHLIHYSYGVNSTERG
DFSSESTVSRIRIEHFPLTLESASPSHTSQYLCASSE
>V189RF-AQIB01162321.1-trbv |(81250, 81547)|2.98164403777|(0.995,1.000,0.987)|1
PLEAQVTQNPRYLITVTGKKLTVTCSQNMNHEYMSWYRQDPGLGLRQIYYSINVEMVDKG
DIPEGYIVSRKEKRNFLLILESPSPSQTSLYFCASSL
>V190RF-AQIB01162321.1-trbv |(86583, 86890)|2.97320030738|(0.986,1.000,0.988)|1
LVDVKVTQSSRYLIKRTGEKVFLECVQDMDHERMFWYRQDPGLGLRLIYFSYDVKLNEKG
DIPEGYNVSREKKERFSLILGFASTNQTSMYLCASSLSTA
>V191RF-AQIB01162321.1-trbv |(106451, 106754)|2.99696400065|(1.000,0.997,1.000)|1
SVFSAVVSQKPSRDVCQRGTSVTIQCQVDSQVTMMFWYRQQPGQSMTLIATANQGSEATY
ESGFVIDKFPISRPNLTFSTLTVSNTSPEDSSIYLCSVE
>V192RF-AQIB01086294.1-ighv |(20916, 21222)|2.35237279133|(0.747,0.943,0.836)|-1
VRCEVQRVESGGGLVQPGGSLRLSCAASGFTISSSWMNWDFQAPGKGLECVSHISSVGST
DYPDSIKGQFTISRDNTKNTLYVQMNSLRAEDMAVYYCAR
>V193RF-AQIB01128636.1-trav |(12150, 12438)|2.97360004313|(0.992,0.984,0.998)|-1
LSGELKVGQNPLFLSTQEGKNDTIYCNYSTASDRLYWYRQDPGKSLESLFVLLSNGAVKQ
EGRFMASLDTKARLSTLHITAALQDLSATYFCAV
>V194RF-AQIB01128637.1-trav |(37303, 37593)|2.16487752254|(0.792,0.627,0.977)|-1
VSSEDKVVQNPLSLVVHDGDTVTLNCSYEVVNFRSLLWYKQEKKAPTFLFMLTSSGIEKK
SGRLSSILDKKELFSILNITATQTRDSAVYLCAVE
>V195RF-AQIB01128637.1-trdv |(70372, 70673)|2.85452791144|(0.996,0.952,0.931)|-1
SGMAQTVTQSQPEMSVREAETVTLSCTYDTSESDYYLFWYQQPPSRQMTLIIRQEAYKQQ
NATENRFSVNFQKAAKSFSLKISDSQLGDAAMYFCAFM
>V196RF-AQIB01128637.1-trav |(79553, 79853)|2.93721046559|(0.992,0.979,0.969)|-1
SGMAQTVTQSQPEMSVREAETVTLSCTYDTSESYYYLFWYKQPPSRQMTLIIRQEAYKQQ
NATENRFSVNFQKAAKSFSLKISDSQLGDAARYFCAYR
>V197RF-AQIB01128641.1-trav |(18235, 18547)|1.58410831029|(0.688,0.502,0.574)|-1
VRGIQVEQSPPDLILQEGANSTLRCNFSATVSNLQWFHQNPWGQLINLFYIPSGTKQNGR
LIATTVTKERYSLLHISSSQTTDSGIYFCAVESQCSPGTCSL
>V198RF-AQIB01128641.1-trdv |(41129, 41429)|2.19739804621|(0.942,0.670,0.865)|-1
SSVAQKVTQAQSSVSMTVGKAVTLNCQYETSWWSYYLFWYKQLPSKEMIFLIRQGSSEQN
ARNGRYSVNFEKAASSIALTISALQLEDSATYFCALWE
>V199RF-AQIB01128641.1-trav |(57380, 57679)|2.13132535502|(0.908,0.607,0.921)|-1
VNGQQIMQIPQYQHVQEGEDFTTYCNFSTTLNNIQWYKQRPGGHPVFLMMLVKSGEVKKQ
KRLTFRSGEAKKNSSLHITASQTTDVGSYFCAGHSAPQ
>V200RF-AQIB01128641.1-trav |(68354, 68644)|2.07564098201|(0.861,0.594,0.869)|-1
TIIDAKTTQPTSMDCAEGRAANLPCNHSTISANEYIHWYRQIHSQGPQYVIHGLKNKETN
AMASLIITEDRKSSTLILPHATLRDTAVYYCIVRV
>V201RF-AQIB01128641.1-trav |(105112, 105436)|1.939577326|(0.648,0.908,0.623)|-1
VNSQQKNDDQQVKQNPPSLSVQEGGISILNCDYTNSMFDYFLWYKKYPAEGPTFLISIRS
VKDKNEEGRFTVFLNKSAKHLSLHIGASQPGDSAVYLCAASAQCSP
>V202RF-AQIB01128642.1-trav |(7440, 7727)|2.99498400013|(0.999,0.997,0.999)|-1
LSGEDQVTQSPEALSLQEGESSSLNCSYTVSGLRGLFWYRQDPGKGPEFLFSLYSAGEEK
EKERLKATLTKKESFLHITGPKPEDSATYLCAVQ
>V203RF-AQIB01128642.1-trav |(19364, 19663)|2.22413031007|(0.851,0.632,0.985)|-1
VSGKQEVTQIPAALSVPEGDNLVLNCSFTDSAIYNLQWFRQDPGKGLTSLLLIQSSQREQ
TSGRLNASLDKSSGRSTLYITASQPTDSATYLCAVRHS
>V204RF-AQIB01128643.1-trav |(8686, 8977)|2.98996000066|(0.998,0.995,0.997)|-1
RTNGDSVTQTEGPVTLPERAALTLNCTYQTSYSAFIFWYVQYPKKEPELLLKSSENQETN
SRGFQASHVKSDSSFHLEKPSVQLSDSAVYYCVLR
>V205RF-AQIB01128643.1-trav |(11902, 12205)|2.9781523093|(0.999,0.995,0.985)|-1
SSMAQKVTQAQTEISVVEKEDVTLDCVYETRETTYYLFWYKQPPSGELVFLIRQNSFNEQ
NEINGRYSSNFQKSTSSFNLTITASQVMDSAVYFCALNE
>V206RF-AQIB01128644.1-trav |(117025, 117341)|2.51565101894|(0.935,0.838,0.826)|-1
QLVTQPEDQVTVAEGNPLTGKCTYSVSGNPYLFWYVQYPNQGLQFLLKYITGDNLVKGNY
GFEAEFNKSQTSFHLKKPSVLVSDSALYFCAVRDTLIGAAGGA
>V207RF-AQIB01128644.1-trav |(158071, 158361)|2.98896000066|(0.995,0.996,0.998)|-1
MSRGDDVEQSLFLSVREGDISVINCTYTDSSSTYLYWYKQEPGAGLQLLIYILSNTDLKQ
DQRLTVLLNKKDKHLSLRIADTQTGDSAIYFCAES
>V208RF-AQIB01128644.1-trav |(168024, 168312)|2.19697937032|(0.898,0.924,0.629)|-1
VKSQKIEQNSETLNIQEGKTATLTCNYTNYSPSYLQWYRQDPGRSPVFLLLIRENEKEKW
KERLKVTFDTTLKKSLFHITASQPADSATYLCAL
>V209RF-AQIB01128644.1-trav |(203408, 203702)|2.99899600001|(1.000,1.000,0.999)|-1
GINGDSVVQTEGQVLLSEGNSLIVNCSYESTQYPSLFWYVQYPGEGPQLLLKAMKDNDKE
SNKGFEATYRKETTSFHLEKDSVQESDSAVYFCALS
>V210RF-AQIB01128644.1-trav |(216592, 216885)|2.96537212748|(0.983,0.989,0.994)|-1
GSGKNQVEQSPQSLIILEGKNCTLQCNYTVSPFSNLRWYKQDTGKGLISLTIMTFSDNTK
SNGRYTATLDADTKQSSLYITAAQLSDSASYICVVS
>V211RF-AQIB01128644.1-trav |(232171, 232464)|2.99598000014|(0.999,0.997,1.000)|-1
VWGQQKEVEQNPGPLSVPEGATASLNCTYSNSAFQYFMWYRQYSRKGPQLLIYIYSSGNK
EDGRFTAQVDKSSKYISLFIRDSQPSDSATYFCAMS
>V212RF-AQIB01128644.1-trav |(237634, 237931)|2.30032859169|(0.959,0.906,0.693)|-1
GTRAQSVTQLDSQVSVSEGVPVLLRCNYSSSFPPNLFWYVQYPNQGLQLLLKYISGTALV
KGINGFKAEFKKSETSFHLTKASAHVSDAAEYFCAVS
>V213RF-AQIB01128644.1-trav |(243150, 243447)|3.0|(1.000,1.000,1.000)|-1
TARAQSVTQPDIHITVSEGASLELRCNYSYGATPSLFWYVQSPGQGLQLLLKYFSGDTLV
QGIKGFEAEFKRSQYSFNLRKPSVHWSDAAEYFCAAG
>V214RF-AQIB01128644.1-trav |(257060, 257353)|3.0|(1.000,1.000,1.000)|-1
VSRGESVGLHLPTVSVQEGDNSVINCTYSDSASDYFLWYKQESGKGPQSIIDIRSNMAKR
QGQRLTVLLNKTMKHLSLQIAATEPGDSAVYFCAEN
>V215RF-AQIB01128644.1-trav |(262905, 263206)|2.97368883957|(0.997,0.999,0.979)|-1
SGIAQKITQTQPAMFVQEKEAVTLDCTYDTSDQSYGLFWYKQPSSGEMIFLIRQESYDKQ
NATEGRYSLNFQKARKSVNLVISASQVEDSAMYFCAMR
>V216RF-AQIB01128644.1-trav |(280831, 281125)|3.0|(1.000,1.000,1.000)|-1
RTRGDSVTQMEGPVTLSERAFLTINCTYTATGYPSLFWYVQYPGEGPQLLLKAVKTDEKG
SNKGFEATYRKETTSFHLKKDSVQESDSAVYFCALS
>V217RF-AQIB01128644.1-trav |(305369, 305662)|3.0|(1.000,1.000,1.000)|-1
VWSQQKEVEQNPGPLSVPEGATASLNCTYSNSAFQYFMWYRQYSRKGPQLLIYIYSSGNK
EDGRFTAQVDKSSKYISLFIRDSQPSDSATYFCAMS
>V218RF-AQIB01128644.1-trav |(340098, 340385)|2.99593600205|(1.000,1.000,0.996)|-1
VNSQQGEEDPQTLSIQEGENATMNCSYKTSINNLQWYRQDSGRSLVQLTLIRSNERQKNS
GRLRVTLDTSKKSSSLLITASRAADTASYFCATD
>V219RF-AQIB01144282.1-igkv |(6898, 7198)|2.68538866514|(0.986,0.813,1.000)|-1
AKCDIQLTQSPTFLSASVGDRATIACRASQSINKGLAWYQQKPGKVPKLLISYASDLYTG
VPSRFSGSGSGTDFTLTISSLQPEDAATYYCFQYNSYP
>V220RF-AQIB01144282.1-igkv |(55648, 55948)|2.99899600001|(1.000,0.999,1.000)|-1
TTGQVILTQSPATLSLSPGERATLSCRASQSVSSYLAWYQQKPGQAPRLLIYSASSRATG
IPDRFSGSGSGTEFTLTISSLEPEDVGVYHCYQYYSGY
>V221RF-AQIB01144282.1-igkv |(64457, 64745)|1.84621007527|(0.594,0.781,0.602)|-1
TILTQSLAFVSATPGDKVTISCKASQDIDDDMNWYQQEPGEAPKLIIKDATTLVSGIPPR
FSGGRYGVDFTLTINNVESEDAAYYFCQQHDNFP
>V222RF-AQIB01144284.1-igkv |(30267, 30585)|2.63677404596|(0.996,0.795,0.995)|-1
AYGDIVMTQSPDSLAVSLGERVTINCKSSQSLLYSSNNKNYLAWYQQKPGQAPTLLISWA
STRESGVPNRFSGSGSGTDFTLTISGLQAEDVAVYYCQQHYSSP
>V223RF-AQIB01145361.1-ighv |(1895, 2208)|2.988|(0.996,0.996,0.996)|-1
VQCEVQLVESGGGLVQPGRFLRLSCAASGFTFSNCYMHWAHQAQGRGLEWVSLMRKKANS
YATEYAVSVKDRFTISRDDSKNTLYLQMNSLKTEDTAVYYCA
>V224RF-AQIB01145362.1-ighv |(14904, 15217)|2.988|(0.996,0.996,0.996)|-1
VQCEVQLVESGGGLVQPGRFLRLSCAASGFTFSNCYMHWAHQAQGRGLEWVSLMRKKANS
YATEYAVSVKDRFTISRDDSKNTLYLQMNSLKTEDTAVYYCA
>V225RF-AQIB01146043.1-iglv |(9768, 10077)|2.65174768455|(0.964,0.985,0.803)|-1
VDSETVVTQEPSLSVSSGGTVTITCGLSSGSVSTSNYPSWYQQTPGQAPRTLIYSTNTRP
SGVPDGFSGSILGNKAALTIMGAQADDESDYYCTLYMGSGI
>V226RF-AQIB01153518.1-ighv |(54, 366)|2.95681294446|(0.968,0.998,0.998)|-1
VLSQVQLQESGPGLLKPSETLSLTCAVSGGSISDSYRWSWIRQPPGKGLEWIGNIYGNSA
STNYNPSLKSRVTISKDTSKNQFSLKLSSVTAADTAVYYCAR
>V227RF-AQIB01158235.1-ighv |(4748, 5060)|2.99594800078|(0.997,0.999,1.000)|-1
VQCEVQLVESGGGLVQPGGSLRLSCVASGFTFSDHYMHWVRQALGKGLEWVSRISSGSGS
STYYADSVKGRFTISRDNAKNTLYLQMNSLRAEDTAVYYCAR
>V228RF-AQIB01159121.1-igkv |(3373, 3688)|2.61621611554|(0.976,0.838,0.899)|-1
SSGDVVMTQSPLSLPVTPGQPASISCRSSQSLVHSDGNTYLSWFQQKPGQPPRLLIYQVS
NRDSGVPDRFSGSGAGTDFTLKISRVEAEDVGVYYCVQGTKVP
>V0RF-CABD02043817.1-igkv |(3028, 3328)|2.99496000066|(0.997,0.998,1.000)|1
ARCDIQMTQSPSSLSASVGDRVTITCQASQGISNNLNWYQQKPEKTPKLLIYAASSLQSG
IPSRFSDSGSGTDYTLTISSLQPEDFATYYCQQSDSTP
>V1RF-CABD02105556.1-trav |(1379, 1688)|2.06244582937|(0.909,0.917,0.583)|1
TIMYLVIGTAGQSLEQPSEVTAVEGATVQINCTYQTSGFYGLSWYQQHDGGAPTFLSYNA
LDGLEETGHFSSFLSRSDSYGYLLLQELQMRDSASYFCAVR
>V2RF-CABD02105568.1-trav |(17605, 17902)|2.67059374292|(0.979,0.808,0.995)|1
GLRAQSVAQPEDQVTVAEGNPLTVKCTYSVSGNPYLFWYVQYPNKGLKFLLKYITGDNLV
KGSYGFEAEFNKSQTSFHLKKPSALVSDSALYFCAVR
>V3RF-CABD02105570.1-trav |(17984, 18274)|2.97776801985|(0.994,0.997,0.987)|1
MSRGEDVEQSLFLSVQEGDSSIIKCTYTDSSSTYLYWYKQEPGAGLQLLMYIFSNMDMKQ
DQRLTVLLNKKDKHLSLRIADTQTGDSAIYFCAES
>V4RF-CABD02105575.1-trav |(937, 1225)|2.27122562922|(0.747,0.749,0.998)|1
VKSQKIEQNSEALNIQEGKTATLTCNYTNYSPAYLQWCRQDPGRGPVFLLLIRENEKEKR
KERLKVTFDTTLKQSLFHITASQPADSATYLCAL
>V5RF-CABD02105579.1-trav |(4709, 5003)|2.99899600001|(1.000,1.000,0.999)|1
GINGDSVVQTEGQVLLSEGDSLIVNCSYETTQYPSLFWYVQYPGEGPQLLLKAMKANDKG
RNKGFEATYHKETTSFHLEKDSVQESDSAVYFCALS
>V6RF-CABD02105581.1-trav |(5845, 6138)|2.93677285433|(0.993,0.951,1.000)|1
GSGKNQVEQSPQSLIILEGKNCTLRCNYTVSPFNNLRWYKQDTGRGPVSLTIMTFSENTK
SNGRYTATLDADTKQSSLHITASQLSDSASYICVVS
>V7RF-CABD02105584.1-trav |(2822, 3110)|3.0|(1.000,1.000,1.000)|1
VWSQRKEVEQDPGPFNVPEGATVAFNCTYSNSASQSFFWYRQDCRKEPKLLMSVYSSGNE
DGRFTAQLNRASQYISLLIRDSQLSDSATYLCAV
>V8RF-CABD02105586.1-trav |(1660, 1957)|2.9829000027|(0.994,0.991,0.998)|1
GTRAQSVTQLDSHVSVSEGTPVLLRCNYSSSYSPSLFWYVQHPNKGLQLLLKYTSRATLV
KGINGFEAEFKKSETSFHLTKPSAHMSDAAEYFCAVS
>V9RF-CABD02105588.1-trav |(5783, 6073)|2.14795609729|(0.993,0.997,0.607)|1
VNGENVEQHPSTLSVQEGDSAVIKCTYSDSASNYFPWYKQELGKGPQLLIDIRSNVGEKK
DQGITVTLNKTAKHFSLHITETQPEDSAVYFCAAS
>V10RF-CABD02105588.1-trav |(25116, 25407)|2.99067605248|(1.000,1.000,0.991)|1
VWSQQKEVEQNSGPLSVPEGAIASLNCTYSDRRSQSFFWYRQYSGKSPELIMSIYSNGDK
EDGRFTAQLNKASQYVSLLIRDSQPSDSATYLCAV
>V11RF-CABD02105589.1-trav |(20536, 20829)|2.97870083945|(0.999,0.981,1.000)|1
VSRGESEGLHLPTLSVQEGDNSIINCAYSNSASDYFIWYKQESGKGPQFIIDIRSNMDKR
QGQRVTVLLNKTVKHLSLQIAATQPGDSAVYFCAEN
>V12RF-CABD02105589.1-trav |(26461, 26764)|2.98270402421|(0.995,0.988,1.000)|1
PGIAQKITQTQPGMFMQEKEAVTLDCTYDTSDQSYGLFWYKQPSSGEMIFLIYQGSYDQQ
NATEGRYSLNFQKARKSANLVISASQLGDSATYFCAMRE
>V13RF-CABD02105590.1-trav |(3574, 3868)|3.0|(1.000,1.000,1.000)|1
RTRGDSVTQMEGPVTLSEEAFLTINCTYTATGYPSLFWYVQYPGEGLQLLLKATKADDKG
SNKGFEATYHKETTSFHLEKDSVQASDSAVYFCALS
>V14RF-CABD02105592.1-trav |(17384, 17677)|2.99496000066|(0.999,1.000,0.996)|1
VWSQQKEVEQDPGPLSVPEGAIASLNCTYSNSAFQYFMWYRQYSRKGPELLMYTYSSGNK
EDGRFTVQVDKSSKYISLFIRDSQPSDSATYLCAMS
>V15RF-CABD02105596.1-trav |(11716, 12003)|3.0|(1.000,1.000,1.000)|1
VNSQQGEEDPQALSIQEGENATMNCSYKTSINNLQWYRQNSGRGLVHLILIRSNEREKHS
GRLRVTLDTSKKSSSLLITASRAADTASYFCATD
>V16RF-CABD02105598.1-trdv |(2122, 2425)|2.98286400565|(0.997,0.994,0.992)|1
SSMAQKVTQTQNEISVVEKEDVTLDCVYETRDTTYYLFWYKQPPSGELVFLVRQNSFDEQ
NEISGRYSWNFQKSTSSFNFTITASQVVDSAVYFCALSE
>V17RF-CABD02105602.1-trav |(5884, 6171)|2.99899600001|(1.000,1.000,0.999)|1
LSGEDQVTQSPEALRLQEGESSSLNCSYTVSGLRGLFWYRQDPGKGPEFLFTLYSAGEEK
EKERLKATLTKKESFLHITAPKPEDSATYLCAVQ
>V18RF-CABD02105602.1-trav |(17805, 18104)|2.93367293132|(0.986,0.958,0.993)|1
VSSKQEVTQIPAALSVPEGENLVLNCSFTDSAIYSLQWFRQDPGKGLTSLLLIQSSQREQ
TSGRLNASLDKSSGHSTLYIAASQPGDSATYLCAVRHS
>V19RF-CABD02105605.1-trav |(10343, 10640)|2.19649444043|(0.814,0.721,0.726)|1
VRGIQVEQSPPDLILQEGANSTLRCNFSDSVNNLQWFHQNPWGQLINLFYIPSGTKQNGR
LSATTVATERYSLLYISSSQTTDSGVYFCAVEPQCSP
>V20RF-CABD02105611.1-trdv |(4032, 4332)|2.97074467291|(0.998,0.981,0.993)|1
SSVAQKVTQAQSSVSTSVRKAVTLNCLYETSQWSYYIFWYKQLPSKEMIFLIRQGSAEQN
AKSGRYSVNFKKAAKSVALTISALQLEDSAKYFCALWE
>V21RF-CABD02105612.1-trav |(1576, 1866)|2.54227860323|(0.971,0.761,0.972)|1
VNSILNVEQSPQSLHVQEGDSTNFTCSFPSSNFYALHWYRWETAKSPEALFVMTLNGDEK
KKGRISATLNTKEGYSYLYIKGSQPEDSATYLCAF
>V22RF-CABD02105614.1-trav |(2102, 2401)|2.23091390683|(0.957,0.949,0.646)|1
VNGQQVMQIPQYQHVQEGEDFTTYCNSSTTLSNIQWYKQRPGGHPVFLIQLVKNGEVKKQ
KRLTFQFGEAKKNSSLHITATQTTDVGTYFCAGHSAPQ
>V23RF-CABD02105615.1-trav |(7807, 8097)|2.98474002125|(0.996,1.000,0.989)|1
TIIDAKTTQPTSMDCAEGRAANLPCNHSTISGNEYVYWYRQIHSQGPQYIIHGLKNNETN
EMASLIITEDRKSSTLILPHATLRDTAVYYCIVRV
>V24RF-CABD02105616.1-trav |(38647, 38934)|2.27800867365|(0.914,0.654,0.953)|1
VRSQQPVQTPQAMILREGEDAVINCSSSKALYSVHWYRQKHGEAPVFLMILLKGGEQKGH
DKISASFNEKKQQSSLYLMASQLSYSGTYFCGAE
>V25RF-CABD02105623.1-trav |(10762, 11052)|1.7956994521|(0.600,0.674,0.977)|1
VSSEDKVVQSPLSLVVHEGDTVTLNCSYEVTNFRSLLWNKQEKKAPTFLFMLTSSGIEKK
SGRLSSILDKKELFSILNITATQTRDSAIYLCAVE
>V26RF-CABD02105626.1-trdv |(13262, 13563)|2.91023335954|(0.997,0.995,0.934)|1
SGTAQTVTQSQPEMSVQEAETVTLSCTYDTSESNYYLFWYKQPPSRQMILVIRQEAYKQQ
NATENRFSVNFQKAAKSFSLKISDSQLGDTAMYFCAFM
>V27RF-CABD02105626.1-trav |(22480, 22780)|2.99798400013|(1.000,1.000,0.998)|1
FSMAQTVTQSQPEMSVQEAETVTLSCTYDTSESDYYLFWYKQPPSRQMILVIRQEAYKQQ
NATENRFSVNFQKAAKSFSLKISDSQLGDAAMYFCAYR
>V28RF-CABD02105628.1-trav |(15554, 15842)|2.9949000027|(0.996,0.999,1.000)|1
LSGELKVGQNPLFLSTQEGKNYTIYCNYSTTSDRLYWYKQDPGKSLESLFVLLSNGAVKQ
EGRLMASLDTKARLSSLHITAAVHDLSATYFCAV
>V29RF-CABD02105628.1-trav |(26467, 26757)|1.85946615213|(0.591,0.624,0.680)|1
GTSSNSVKQMGQITVSEGASVTMNGTYTSTGYPTLFWYVQYPSKPLQLLQRETMENSKNF
GGGNIKDKNSPIVKYSVQVSDSAMYYCLLGDTVLK
>V30RF-CABD02105628.1-trav |(32227, 32513)|2.02068003481|(0.675,0.679,0.667)|1
VSAAKNEVEQSPQDLTAQEGEFITINCSYSVGISVLHWLQQYPGGGIVSLFMLSSGKKKH
GRLIATINIQEKHSSLHITASHPRDSAIYICAV
>V31RF-CABD02136297.1-ighv |(2232, 2554)|2.46168859584|(0.883,0.739,0.927)|1
VLSQVTLKESGPVLVKPTEILTLTCTLSGFSLSTSGMGMSWIRQPPGKALEWLAHIFSND
KKSYSTSLKNRLIISKGTSKSQVVLTMTNMDPVDTATYYCAWRAQ
>V32RF-CABD02136313.1-ighv |(4960, 5275)|2.17921333736|(0.704,0.996,0.851)|1
VQCEVQLVESGGGLVQPGGSLRLSCAASGFTFSNIWMSWVRQALGKGLEWVGCIKSKANG
GTTDYTAPVKGRFTISRDDSKNTLYLQMNSLKTEDTAVYHCTT
>V33RF-CABD02136332.1-ighv |(9347, 9656)|2.99899200002|(0.999,1.000,1.000)|1
AHSQVQLVQSGAEVKKPGASVKVSCKASGYTFTSYYMHWVRQAPGQGLEWMGIINPSGGS
TSYAQKFQGRVTMTRDTSTSTVYMELSSLRSEDTAVYYCAR
>V34RF-CABD02136430.1-ighv |(38815, 39121)|2.98070803341|(0.992,0.989,1.000)|1
VQCEVHLVQSGGGLVQPGGSLRLSCAGSGFTFSSHAMHWVRQAPGKGLEWVSAIGTGGGT
YYADSVKGRFTISRDNAKNSLYLQMNSLRAEDMAVYYCAR
>V35RF-CABD02196505.1-igkv |(9143, 9461)|2.43139706538|(0.986,0.712,0.993)|1
AYGDIVMTQSPESLAVSLGERVTINCKSSQSVLYSSNNKNYLAWYQQKPGQAPKLLIYWA
STRQSGVPDRFSGSGSGTDFTLTISSLQAEDVAVYYCQQYYSTP
>V36RF-CABD02196508.1-igkv |(2277, 2565)|2.27758121945|(0.852,0.681,0.855)|1
TTLTQSPAFVSATPGDKVTISCKASQDIDDDMNWYQQKPGEAAIFIIQEATTLVSGIPPR
FSGSGYGTDFTLTINNIESEDAAYYFCLQDDNFP
>V37RF-CABD02196554.1-igkv |(8457, 8757)|3.0|(1.000,1.000,1.000)|1
ARCDIQLTQSPTSLSASVGDRVTITCQASQGISNNLAWYQQKPGKVPKLLIYSASSLQSG
VPSRFSGSGSGTDFTRTISSLQPEDVATYYCQRTYNAP
>V38RF-CABD02196563.1-igkv |(2290, 2590)|3.0|(1.000,1.000,1.000)|1
ARCDIQMTQSPSSLSASVGDRVTITCRASQGISSWLAWYQQKPGKAPKLLIYAASSLESG
VPSRFSGSGSGTDFTLTISSLQPEDFATYYCQQANSFP
>V39RF-CABD02196568.1-igkv |(5046, 5361)|2.73222579646|(0.996,0.905,0.900)|1
SSADIVMTQTPLSLPVTPGQPASISCKSSQSLLHSDGKTYLYWYLQKPGQSPQLLIYEVS
NRASGVPDRFSGSGSGTDFTLKISRVEAEDVRVYYCMQGIQLP
>V40RF-CABD02196577.1-igkv |(8821, 9136)|2.48078156133|(0.957,0.745,0.944)|1
SSGDIVMTQTPLSLPVNPGQLASISCRSSQSLLHSNGYTYLHWYLQKPGKSPQLLIYRVS
SHFSGVPDRFSGSGSGSDFTLKISWVEAEDVGVYYCMQATQFP
>V41RF-CABD02196578.1-igkv |(13447, 13733)|2.59603144307|(0.939,0.839,0.874)|1
FLSVTPGEKVTITCQASEGIGNYLYWYQQKPDQAPKLLIKYASQSISGVPSRFSGSGSGT
DSGSGSGTDFTFAISSLEAEDAATYYCQQGNKH
>V42RF-CABD02196586.1-igkv |(1073, 1373)|2.99899600001|(1.000,0.999,1.000)|1
ARCDIQMTQSPSSVSASVGDRVTITCRASQGISNSLNWYQQKPGKAPRLLIYDASSLESG
VPSRFSGSGSGTDFTLTISSLQPEDFATYYCQQFNSYP
>V43RF-CABD02196587.1-igkv |(1282, 1582)|3.0|(1.000,1.000,1.000)|1
ARCAIQMTQSPSSLSASVGDRVTITCRASQGISSYLAWYQQKPGKAPKLLIYYASSLQSG
VPSRFSGSGSGTDYTLTISSLQPEDFATYYCQQHSSTP
>V44RF-CABD02196588.1-igkv |(1835, 2135)|2.99698000014|(1.000,0.998,0.999)|1
TTGEIVMTQSPATLSVSPGERATLSCRASQSVSSYLAWYQQKPGQAPRLLIYGASNRATG
IPARFSGSGSGTDFTLTISSLEPEDFAVYYCQQYNNWS
>V45RF-CABD02196592.1-igkv |(6343, 6643)|1.54438519019|(0.866,0.627,0.563)|1
VRFDIQMTQSPSFLSASVGDRVSITCRASEGISSDLAWYLQKPGKSPKLFLYDAKDLRPG
VSSRFSGRGSGTDFTLTIISLKPEDFATYYCKQDFSYP
>V46RF-CABD02196595.1-igkv |(5365, 5665)|2.99698000014|(1.000,0.999,0.998)|1
ARCAIRMTQSPSSLSASTGDRVTITCRASQGISSYLAWYQQKPGKAPKLLIYAASTLQSG
VPSRFSGSGSGTEFTLTISCLQSEDFATYYCQQYYSYP
>V47RF-CABD02199693.1-igkv |(2056, 2356)|2.99899600001|(1.000,1.000,0.999)|1
ARCDIQVTQSPSSLSASVGDRVTITCRASQGISNELSWYQQKPGQAPTLLIYAASSLQSG
VPSRFSGSGSGTDFTLTISSLQPEDIATYYCLQDYTTP
>V48RF-CABD02231299.1-iglv |(4157, 4463)|2.98021230726|(0.998,0.999,0.984)|1
DSQTVVTQEPSFSVSPGGTVTLTCGLSSGSVSTSYYPSWYQQTPGQAPRMLIYSTNTRSS
GVPDRFFGSIIGNKAALTITGAQADDESDYYCVLYMGSGI
>V49RF-CABD02231318.1-iglv |(3555, 3862)|2.99067605248|(1.000,1.000,0.991)|1
SWANFMLTQPHSVSESPGQTVTISCTRSSGSIASNYVQWYQQRPGSAPTTVIYEDNQRPS
GVPDRFSGSIDSSSNSASLTISGLKTEDEADYYCQSYDSS
>V50RF-CABD02231359.1-iglv |(5556, 5865)|2.99593600205|(1.000,1.000,0.996)|1
SWAQSVLTQPPSVSAAPGQKVTISCSGSSSNIGNNYVSWYQQLPGTAPKILIYDNNKRPS
GISDRFSGSKSGTSATLGITGLQTGDEADYYCGTWDSSLSA
>V51RF-CABD02231360.1-igkv |(15331, 15617)|1.51218782163|(0.480,0.513,0.536)|1
SLSQPVLTQPPSASASLGASVTLTCPLSSGYSNYKVDWYQQRPGKGPRFVMRVGTSGIVG
SKGDGIPDRFSVLGSGLNRYLTIKNIQEEDESD
>V52RF-CABD02231360.1-iglv |(25045, 25355)|2.5649593666|(0.984,0.763,0.996)|1
SLSQPVLTQPTSLSASPGASARLTCTLRSGINLGTYRIYWYQQKPGSPPRYLLNYYSDSD
KHQGSGVPSRFSGSKDASTNAGILVISGLQSEDEADYYCMI
>V53RF-CABD02231362.1-iglv |(1583, 1892)|2.99899200002|(0.999,1.000,1.000)|1
SWAQSVLTQPPSASGTPGQRVTISCSGSSSNIGSNTVNWYQQLPGTAPKLLIYDNNKRPS
GVPDRFSGSKSGTSASLAISGLRSEDEADYYCAAWDDSLNG
>V54RF-CABD02231364.1-iglv |(18770, 19079)|2.99799600001|(0.999,0.999,1.000)|1
SWAQSVLTQPPSASGTPGQRITISCSGSSSNIGSNTVNWYQQLPGTAPKLLIYDNNKRPS
GVPDRFSGSKSGTSASLAISGLQSEDEADYYCAAWDDSLNG
>V55RF-CABD02231410.1-iglv |(1308, 1605)|2.99899200002|(0.999,1.000,1.000)|1
SVASYELTQPSSVSVSPGQTARITCSGDVLAKNYAGWYQQKPGQAPVLVIYKDSERPSGI
PERFSGSSSGTTVTLTISGAQVEDEADYYCYSAADNN
>V56RF-CABD02231415.1-iglv |(2745, 3048)|2.95863747374|(0.998,0.965,1.000)|1
SEASYELTQPPSVSVSLGQTARITCSGEELPKKYAYWYQQKPGQSPVLVIYKDSERPSGI
PERFSGSSSGTTVTLTISGVQAEDEADYYCLSADSSDTY
>V57RF-CABD02231416.1-iglv |(14948, 15251)|2.11410259067|(0.903,0.948,0.592)|1
SVTSYELTQPPSVSVAPGQAARITCGGNNIGSKSVHWYQQKPGQAPVLVIYYDSDWPSGI
PERFSGSNSGNTATLTISRVEAGDEADCYCQVWDSSSKH
>V58RF-CABD02231416.1-iglv |(22863, 23166)|2.78653903739|(0.992,0.863,0.996)|1
SVVSSELTQDPAVSVALGQTVRITCQGDSLRSYYASWYQQKPGQVPVLIIYGKNNRPSGI
PDRFSGSSSGNTASLTITGAQEEDEADYYCNSWDSSGNH
>V59RF-CABD02231419.1-iglv |(2003, 2306)|2.98867205249|(0.999,1.000,0.990)|1
SWAQSALTQPPSVSGSPGQSVTISCTGTSSDIGGYNRASWYQQHPGKAPKLMIYEVSKRP
SGVSNRFSGSKSGNTASLTISGLQAEDEADYYCSSYTSS
>V60RF-CABD02231421.1-iglv |(1448, 1751)|2.99385601037|(1.000,1.000,0.994)|1
SWAQSALTQPASVSGSPGQSITISCTGTSSDVGGYNYVSWYQQHPGKAPKLMIYYVSNRP
SGVSNRFSGSKSGNTASLTISGLQAEDEADYYCSSYTSS
>V61RF-CABD02231422.1-iglv |(7425, 7728)|2.97810040488|(0.998,0.983,0.998)|1
SATSYELTQPHSVSVATAQTARITCGGNNIGSKAVHWYQQKPGQDPVLVIYSDSNRPSGI
PERFSGSNSGNTATLTISRIEAGDEADYYCQVWDSSSDH
>V62RF-CABD02231427.1-iglv |(14063, 14366)|2.99599600001|(0.999,0.998,0.999)|1
SEASYELTQSPSVSVSPGQTARITCSGDALPKKYAYWYQQKPGQAPVLVIYEDSKQPSGI
PERFSGSSSGTMATLTISGAQVEDEADYYCYSTDSSGNH
>V63RF-CABD02231427.1-iglv |(25067, 25377)|2.86355045787|(0.982,0.996,0.908)|1
SWAQSALIQPPSASGSPGQSVTISCTGTSSDIGGYNYVSWYQRHPGKAPKLMIYEVSNRP
SGVPNRFSGSKSGNTASLTISGLQAEDEADYYCCSYAGSNN
>V64RF-CABD02231431.1-iglv |(3583, 3879)|3.0|(1.000,1.000,1.000)|1
SVASYELTQPPSVSVSPGQTASITCSGDKLGDEYAYWYQQKPGQSPVLVIYQDSKRPSGI
PERFSGSNSGNTATLTISGTQAMDEADYYCQAWDSST
>V65RF-CABD02352478.1-trbv |(1118, 1418)|2.17758684394|(0.992,0.999,0.617)|1
LTEPEVTQTPSHQVTQMGQEVILRCVPISNHLYFYWYRQILGQKVEFLVSFYNNKISEKA
EIFDDQFSVERPDGSNFTLKIRSTKLEDSAMYFCASSE
>V66RF-CABD02352480.1-trbv |(136, 449)|2.97482866804|(0.997,0.999,0.980)|1
PIDTEVTQTPKHLVMGMTNKKSLKCEQHMGHRAMYWYKQKAKKPPELMFVYSYEKLSVNE
SVPSRFSPECPNNSLLNLHLHALQPEDSALYLCASSQDTALQ
>V67RF-CABD02352480.1-trbv |(7988, 8284)|2.33134858062|(0.972,0.815,0.778)|1
PVEAGVTQTPRYLIKTRGQQVTLSCSPISGHRSVSWYQQTLGQGLQFLFEYFGETQRNKG
NFPGRFSGRQFSNSRSEMNVSTLELGDSALYLCASSL
>V68RF-CABD02352482.1-trbv |(248, 545)|2.99594800078|(0.997,0.999,1.000)|1
PVNAGVAQTPKFQVLKTGQSMTLQCAQDMNHNSMYWYRQDPGMGLRLIYYSAAEGTTAKG
EVPDGYNVSRLNKREFSLRLESAAPSQTSVYFCASSE
>V69RF-CABD02352488.1-trbv |(3197, 3494)|2.99293600205|(0.999,0.995,0.999)|1
PVNAGVTQTPKFHVLKTGQSMTLLCAQDMNHEYMYWYRQDPGMGLRLIHYSVGEGTTAKG
EVPDGYNVSRLKKQNFLLGLESAAPSQTSVYFCASSY
>V70RF-CABD02352491.1-trbv |(2383, 2680)|3.0|(1.000,1.000,1.000)|1
PLDTAVSQTPKYLVTQMGKKESLKCEQNLGHNAMYWYKQDSKKFLKTMFIYSNKEPILNE
TVPNRFSPDSPDKAHLNLHINSLELGDSAVYFCASSQ
>V71RF-CABD02352492.1-trbv |(775, 1088)|2.92516849053|(0.999,1.000,0.940)|1
PMEMGVTQTPRHLVMGMTNKKSLKCEQHLGHNAMYWYKQSAKKPLELMFVYSLEERVENN
SVPSRFSPECPNSSHLFLHLHALQPEDSALYLCASSQDTALQ
>V72RF-CABD02352493.1-trbv |(4882, 5179)|2.97580866856|(0.997,1.000,0.980)|1
PVDAGVTQTPKFQVLKTGQSMTLQCAQDMNHNYMYWYRQDPGKGLRLIHYSAGEGTTAKG
EVPDGYNVSRLNTQNFLLRLELAARSQTSVYFCATSE
>V73RF-CABD02352494.1-trbv |(447, 747)|2.95152072039|(0.993,0.976,0.984)|1
HTRAGVSQSPSNKVTEKGKDVVFRCDPISGHSVLYWYQQSLGQGLEFLIYFQGNSAPDKS
GLPSDRFSAERTGGSVSTLTIQRTQQEDSAMYLCASSL
>V74RF-CABD02352498.1-trbv |(5308, 5605)|2.49688509678|(0.988,0.890,0.795)|1
PMIAGITQAPTSQILAAGRSMTLRCTQDMRHNAMYWYRQDLGLGLRLIHYSNTAGTTGKG
EVPDGYSVSRANTDDFPLMLASAVPSQTSVYFCASSD
>V75RF-CABD02352499.1-trbv |(1151, 1451)|2.99174403277|(1.000,1.000,0.992)|1
HTGAGVSQTPSNKVTEKGKDVELRCDPISGHTALYWYRQSLGQGPEFLIYFQGTGATDDS
GLPNDRFFAVRPEGSVSTLKIQRTEQGDSAVYLCASSL
>V76RF-CABD02352499.1-trbv |(5984, 6280)|2.15964333735|(0.809,0.665,0.771)|1
PVEAGATQSPTHLLKTRGQQVTLRCSPISGHSSVSWYQKAPGQGPQFIFEYANELRRLEG
NFPNRFSGRQFHDYRSEMNVSALELGDSALYLCARSL
>V77RF-CABD02352499.1-trbv |(8716, 9012)|2.9864040992|(0.990,1.000,0.997)|1
PVDSGVTQTPKHLITATGQRVTLRCSPRSGDLSVYWYQQSLDQGLQFLIQYYNGEERAKG
NILERFSAQQFPDSHSELNLSSLELGDSALYLCASSV
>V78RF-CABD02352499.1-trbv |(16726, 17023)|1.96446792058|(0.806,0.540,0.984)|1
HRDAEITQSPRHKITETGRQVTLACYQTWNHNNMFWYRQDLGHGLRLSHYSYGVQDTNKG
EVSDGCSVSRSNTEDFPLTLESAASSQTSVYFCASSE
>V79RF-CABD02352501.1-trbv |(6663, 6963)|2.04533731781|(0.742,0.600,0.790)|1
CTDPGIIQSPKHEVTEMGQTVTLRCEPIFGHNLLFWYRETFVQGLELLSYFRSRSIIDNA
GMPTDRFSAERPDGSFSTLKIQPAEQGDSAVYVCASRL
>V80RF-CABD02352501.1-trbv |(16783, 17080)|2.96190837717|(0.999,1.000,0.967)|1
PVNAGVTQTPKFQVLKTGQSMTLQCAQDMNHDYMYWYRQDPGMGLRLIHYSVGAGITDKG
EVPNGYNVSRSNTEDFPLRLQSAAPSQTSVYFCASSY
>V81RF-CABD02352502.1-trbv |(788, 1088)|2.99899600001|(1.000,0.999,1.000)|1
HTGAGVSQSPRYKVAKRGRDVALRCDSISGHVTLYWYRQTLGQGSEVLTYFRSDAQRDKS
GRPSGRFSAERPERSVSTLKIQRTEQGDSAVYLCASSL
>V82RF-CABD02352503.1-trbv |(2597, 2893)|2.99298400013|(0.997,0.997,0.999)|1
SVETGVTQSPTHLIKTRGQQVTLRCSPQSGHNTVSWYQQALGQGPQLIFQYYREEENGRG
NFSPRFSGRQFPNYSSELNVNALELDDSALYLCASSL
>V83RF-CABD02352508.1-trbv |(1078, 1374)|2.99899200002|(0.999,1.000,1.000)|1
PVDAGVTQSPTHLIKTRGQQVTLRCSPQSGHNTVSWYQQALGQGPQFIFEYYEKEERGRG
NFPDRFSARQFPNYSSELNVNALLLGDSALYLCASSL
>V84RF-CABD02352508.1-trbv |(6352, 6643)|1.9368099056|(0.651,0.659,0.629)|1
NAGVTQTPKFHVVKTGQSMTLLCAQDMNHEYMYRYRQDPGKGLRLIYYSVAAALTDKGEV
PNGYNVSRSNTEDFPLKLESAAPSQTSVYFCGSSY
>V85RF-CABD02352509.1-trbv |(2773, 3083)|2.11644799711|(0.861,0.954,0.590)|1
HTGAGVSQAPRFKVTKRGQDVALRCDPISGHVALYWYRQALGQGPEFLTYFNDEAQPDKS
GMPNDRFSAERPEGSISTLTIQRTEQRDSAMYLCASSLARA
>V86RF-CABD02352509.1-trbv |(10643, 10939)|2.99498400013|(0.999,0.997,0.999)|1
LVDAGVTQSPTHLIKTRGQQVTLRCSPKSGHDTVSWYQQALGQGPQFIFQYYEEEERQRG
NFPDRFSGHQFPNYSSELNVNALLLGDSALYLCASSL
>V87RF-CABD02352510.1-trbv |(11938, 12229)|2.95451241325|(0.999,0.972,0.987)|1
NAGVTQTPKFHILKTGQSMTLQCAQDMNHGYMSWYRQDPGMGLRLIYYSAAAGTIDKGEV
PNGYNVSRLNTEDFLLRPVSAAPSQTSVYFCASSY
>V88RF-CABD02352511.1-trbv |(3159, 3459)|3.0|(1.000,1.000,1.000)|1
HTGAGVSQSPRYKVTKRGQDVTLRCDPISSHATLYWYQQALGQGPEFLTYFNYEAQPDKS
GLPNDRFSAERPEGSNSTLTIQRTEQRDSAMYLCASSL
>V89RF-CABD02352511.1-trbv |(16331, 16627)|2.4852716929|(0.973,0.975,0.737)|1
PVDAGVTQSPTHLIKMRGQQVTLRCSPKSGHDTVSWYQQALGQGPQFIFEYYEKEERGRG
NFPDRFSARQFPNYSSELNVNPLLMGDSALYLCASSL
>V90RF-CABD02352511.1-trbv |(25598, 25898)|3.0|(1.000,1.000,1.000)|1
HADTGVSQDPRHKITKRGQNVTFRCDPISEHNQLYWYRQTLGQGPEFLTYFQNEAQLEKS
RLLSDRFSAERPKGSFSTLEIQRTEQGDSAMYLCASSL
>V91RF-CABD02352512.1-trbv |(835, 1135)|3.0|(1.000,1.000,1.000)|1
HADTGVSQDPRHKITKRGQNVTFRCDPISEHNQLYWYRQTLGQGPEFLTYFQNEAQLEKS
RLLSDRFSAERPKGSFSTLEIQRTEQGDSAMYLCASSL
>V92RF-CABD02352512.1-trbv |(7390, 7687)|2.97384066792|(0.997,0.980,0.998)|1
SVAAGVIQSPRHLIKEKRETATLKCYPIPRHDTVYWYQQGPGQDPQFLISFYEKMQSDKG
SIPDRFSAQQFSDYHSELNMSSLELGDSALYFCASSL
>V93RF-CABD02352513.1-trbv |(1353, 1650)|2.99699200002|(0.999,1.000,0.998)|1
HMDAGITQSPRHKVTEIGTPVTLRCHQTENHRYMYWYRQDPGHGLRLIHYSYGVKDTDKG
EVSDGYSVSRSKTEDFLLTLESATSSQTSVYFCAISE
>V94RF-CABD02352514.1-trbv |(8741, 9041)|2.99294800078|(0.998,0.995,1.000)|1
LIEAGVVQSPRYKIIEKKQPVAFWCNPISGHNTLYWYRQNLGQGPELLIRYENEEAVDDS
QLPKDRFSAERLKGVDSTLKIQPAELGDSAVYLCASSL
>V95RF-CABD02352514.1-trbv |(14343, 14643)|2.99899200002|(0.999,1.000,1.000)|1
HTDAGVIQSPRHEVTEMGQEVTLRCKPISGHNSLFWYRQTMMRGLELLIYFNNNVPIDDS
GMPKDRFSAKMPNASFSTLKIQPSEPRDSAVYFCASSL
>V96RF-CABD02352515.1-trbv |(2177, 2477)|2.98230822856|(0.998,1.000,0.985)|1
HTDAGVIQSPRHEVTEMGQEVTLRCKPISGHNSLFWYRQTMMRGLELLIYFNNNVPIDDS
AMPKDRFSAKMPNASFSTLKIQPSEPRDSAVYFCASSL
>V97RF-CABD02352520.1-trbv |(3657, 3957)|2.97897252412|(0.999,0.983,0.998)|1
HIEAGVTQFPSHSVIEKGQTVTLRCDPISGHDNLYWYRRVMGKEIKFLLHFVKESKQDES
GMPNNRFLAERTGGTYSTLKVQPAELEDSGVYFCASSQ
>V98RF-CABD02352520.1-trbv |(8783, 9080)|2.54187413994|(0.952,0.914,0.786)|1
HGDAMVIQNPRYQVTQFGKPVTLSCSQNLNHNIMYWYQQKSSQAPKLLFHYYDKDFNNEA
DTPDNFQSRRPNTSFCFLDISSPGLGDAAMYLCATSR
>V99RF-CABD02352525.1-trbv |(5450, 5746)|2.93433795981|(0.991,0.976,0.970)|1
LSNAGVMQNPRHLVRRRGQEARLRCSPMKGHSHVYWYRQLPEEGLKFMVYLQKENIIDES
GMPKERFSAEFPKEGPSILRIQQAVRGDSAAYFCASS
>V100RF-CABD02352526.1-trbv |(2325, 2622)|3.0|(1.000,1.000,1.000)|1
TVDGGITQSPKYLFRKEGQNVTLNCEQNLNHDAMYWYRQDPGQGLRLIYYSQIVNDFQKG
DIAEGYSVSREKKESFPLTVTSAQKNPTAFYLCASSI
>V101RF-CABD02352526.1-trbv |(20182, 20482)|2.47292667378|(0.924,0.839,0.799)|1
STDTKVTQRPRLLVKASEQKAKMDCVPIKGHSYVYWYRKKLEEELKFLVYFQNEEIIQKA
EIINERFLAQCSKNSSCTLEIQSTESGDTALYFCASSK
>V102RF-CABD02352526.1-trbv |(29242, 29542)|2.97810040488|(0.998,0.998,0.983)|1
SFHAKVTQTPGHLVKGKGQKTKMDCTPEKGHTFVYWYQQNQNKEFMLLISFQNEQVLQET
EMHKKRFSSQCPSNTPCSLAILSSEPGDTALYLCASSQ
>V103RF-CABD02352529.1-trbv |(2516, 2814)|2.9138228881|(0.993,0.992,0.940)|1
SMDADVTQTPRNRITKTGKRIMLECSQTKGHDRMYWYRQDPGLGLRLIYYSFDVKDINKG
EISDGYSVSRQAQAKFSLSLESATPNQTALYFCATSD
>V104RF-CABD02352529.1-trbv |(16657, 16954)|2.30872895513|(0.949,0.999,0.658)|1
LMEADIYQTPRYLVIGTGKKITLECSQTMGHDKMYWYQQDPGMELHLIHYSYGVNSTEKG
GLSSESTVSRIRTEHFPLTLESARPSHTSQYLCASSE
>V105RF-CABD02352531.1-trbv |(24520, 24817)|2.98851611711|(1.000,1.000,0.989)|1
PLEAQVTQNPRYLITVTGKKLTVTCSQNMNHEYMSWYRQDPGLGLRQIYYSINVEAIDKG
DVPEGYNVSRKEKRNFPLILESPSPNQTSLYFCASSL
>V106RF-CABD02352532.1-trbv |(6479, 6776)|2.99399200002|(0.998,0.999,0.997)|1
LVDVKVTQSSRYLVKRMGEKVFLECVQDMDHENMFWYRQDPGLGLRLIYFSSDVKMKEKG
DIPEGYSVSREKKERFSLILESTSTNQTSMYLCASSL
>V107RF-CABD02377004.1-trbv |(3098, 3398)|2.95966884009|(0.994,0.976,0.991)|1
SMDTKVTQRPRLLVKANEQKAKMDCVPIKRHSYVYWYHKTLEEELKFLIYFQNEEIIQKA
EIINERFSAQCPQNSPCTLEIQSTESGDTARYFCANSK
>V108RF-CABD02377004.1-trbv |(12039, 12339)|2.14881063316|(0.799,0.657,0.773)|1
CFHAKVTQTPGYLVKGKGRKTKMYCTPENGHTFVCWYQQNQNKEFMFLISFQNEQVLQET
EMHKKRFSPQCPKNPPCSLAILSSEPGDTALYLCASSP
>V109RF-CABD02377005.1-trbv |(21584, 21875)|2.94083253448|(0.988,0.982,0.972)|1
LMEAEIYQTPRYHVIGTGKKITLECSQTMGHDKMYWSRSRNGITPHPPFLWVNSTEKGDL
SSESTVSRIRIEHFPLTLESASPSHTSQYLCASSE
>V110RF-CABD02377030.1-trbv |(2304, 2607)|2.95022423344|(0.981,0.994,0.976)|1
SVFSAVISQKPSRDICQRGTSMTIQCQVNSQVTMMFWYCQQPGQSVTLIATANQGSEATY
ESGFVIDKFPISCPNLTFSTLTVSNRSPEDSSIYLCSVE
>V111RF-CABD02105639.1-trdv |(1838, 2144)|2.97767205249|(0.996,0.995,0.987)|-1
RGMLCDKVTQSSPDQTVASGSEVVLLCTYDTVYSNPDLFWYRIRPDYSFQFVFYGDNSGS
QAADFTQGRFSVKHILTQKAFHLVISPVRTEDSATYYCAF
>V112RF-CABD02117385.1-ighv |(3331, 3640)|3.0|(1.000,1.000,1.000)|-1
AHSQVQLVQSGAEVKKPGASVKVSCKASGYTFTGYAMHWVRQAPGQRLEWMGWINTGNGN
TKYSQKFQGRVTITRDTSASTAYMELSSLRSEDTAVYYCAR
>V113RF-CABD02117388.1-ighv |(2426, 2731)|1.54408521063|(0.753,0.542,0.556)|-1
VLSQITLKESGPTLVKPTQTLTLTCTFSGFSLSTSGTSVSWIRQPPGKALEWLAAIYSDD
DKRYSPSLKSRLTITKDTSKNQVVLTMTNMDPVDTATYYC
>V114RF-CABD02117395.1-ighv |(10192, 10503)|2.99593600205|(1.000,1.000,0.996)|-1
VQCEVQLVESGGGLVQPGRSLRLSCVASGFTFDDYAMHWVRQAPGKGLEWVSGISWNSGS
TGYADSVKGRFTISRDNAKNSLYLQMNSLRAEDTALYYCAKD
>V115RF-CABD02117395.1-ighv |(23380, 23689)|2.75715320354|(0.978,0.985,0.854)|-1
VHSQVQLVQSGAEVRKPGSSVKVSCKLSGGTFSSYAISWVRQAPGQGLEWMGGFIPILGT
ANYAQKFQGRVTITADESTSTAYMELSSLRSEDTAVYYCAR
>V116RF-CABD02117398.1-ighv |(503, 809)|2.99899600001|(1.000,1.000,0.999)|-1
VQCEVQLVESEGGLVQPGGSLRLSCAASGFTFSSYNMHWVRQAPGKGLEWVSAIGTGGDT
YYPGSVKGRFTISRENAKNSLYLQMNSLRAEDTAVYYCAR
>V117RF-CABD02117416.1-ighv |(7584, 7893)|2.99593600205|(1.000,1.000,0.996)|-1
VQCEVQLVESGGGLVQPGGSLRLSCAASGFTFSDYYMSWVRQAPGKGLEWVSGINWNGGS
TGYADSVKGRFTISRNNAKNSLYLQMNSLRAEDTALYYCAR
>V118RF-CABD02117419.1-ighv |(907, 1216)|3.0|(1.000,1.000,1.000)|-1
VQCEVQLVESGGGLVKPGGSLRLSCAASGFTFSSYWMSWVRQAPGKGLEWVSVISSSGRT
TYYADSVKGRFTISRDNAKNSLYLQMNSLRAEDTAVYYCAR
>V119RF-CABD02117420.1-ighv |(2703, 3012)|2.99899600001|(1.000,0.999,1.000)|-1
VQCDVQLVESGGGLVQPGGSLRLSCAASGFTFSSYGMSWVRQAPGKGLEWVSYISSSSSY
IYYADSVKGRFTISRDNAKNSLYLQMNSLRAEDTAVYYCAR
>V120RF-CABD02117421.1-ighv |(1503, 1818)|3.0|(1.000,1.000,1.000)|-1
AQCEVQLVESGGGLVKPGGSLRLSCAASGFTFSNYYMEWVRQAPGKGLEWVGFIRTKAKG
GTTEYAASVKGRFTISRDDSKSIAYLQMNSLKTEDTAVYYCTR
>V121RF-CABD02117430.1-ighv |(2094, 2408)|2.53261382323|(0.941,0.786,0.903)|-1
VLSQVTLKESGPVLVKPTETLTLTCTVSGFSLSNARMGVSWIRQPPGKALEWLAHIFSND
EKSYSTSLKSRLTISKDTSKSQVVLTMTNMDPVDTATYYCAWI
>V122RF-CABD02117431.1-ighv |(1312, 1621)|2.99389600501|(1.000,0.999,0.995)|-1
AHSQVQLVQSGSEVKKPGASVKVSCKASGYTFTSYGMNWVRQAPGQGLEWMGWINTYTGN
PTYAQGFTGRFVFSMDTSVSTAYLQISSLKAEDTAMYYCAR
>V123RF-CABD02117438.1-ighv |(419, 731)|2.30823461948|(0.853,0.979,0.667)|-1
VLSQVQLQQWGPGLVKPSETLSLTCAVYGGSISSSDYYWSWIRQPPGKGLEWIGLINYVR
STNYNPSLKSRVTISVDTSKNQFSLKLSSVTAADTAVYYCAR
>V124RF-CABD02117439.1-ighv |(2063, 2375)|2.75306024415|(0.909,0.880,1.000)|-1
VLSQVQLQQWGTGLVKPSETLSLTCAVYGGSISSDGYYWSWIRQPPGKGLEWIGYIYYSG
STYYNPSLKSRVTISVDTSKNQFSLKLSSVTAADTAVYYCAR
>V125RF-CABD02117442.1-ighv |(1416, 1725)|2.99296000066|(0.997,0.996,1.000)|-1
VQCQVQLVESAGGVVQPGRSLTLSCTASGFTFSSYGMHWVRQAPGKGLEWVAVISYDASN
KYYAASVKGRFTISRDNSKNTLYLQMNSLRAEDTAVYYCAK
>V126RF-CABD02117444.1-ighv |(7682, 7991)|3.0|(1.000,1.000,1.000)|-1
VQCQVQLVESGGGVVQPGRSLRLSCTASGFTFSSYGMHWVRQAPGKGLEWVAVISYDASN
KYYADSVKGRFTISRDNSKNTLYLQMNSLRAEDTAVYYCAK
>V127RF-CABD02117445.1-ighv |(8585, 8891)|2.26209525525|(0.903,0.907,0.661)|-1
VLSQVQLQQWGAGVVKPSETLSLTCAVYGGSFSGYYWNWIRQPPGKGLEWIGRISYDGST
NYNPSLKSRVTISVDTSKNQFSLKLSSVTAADTAVYYCAR
>V128RF-CABD02117454.1-ighv |(1407, 1716)|2.65547321532|(0.994,0.977,0.811)|-1
VLSQVQLQESGPGLVKPSETLSLTCVVSGGSISSSNWWSWVRQPPGKGLEWIGEIYHSGS
PNYNPSLKSRVTISVDKSKNQFSLKLSSVTATDTAVYYCAR
>V129RF-CABD02117457.1-ighv |(5100, 5407)|2.98521630725|(1.000,1.000,0.986)|-1
VQCEVQLVESGGGLVQPEGSLKLSCAASGFTFSSYAMDWVRQAPGKGLEWVAHIWNDGSQ
KYYADSVKGRFTISRDNSKSMLYLQMDSLKAEDTAMYYCT
>V130RF-CABD02117463.1-ighv |(7715, 8026)|2.74451417048|(0.994,0.999,0.841)|-1
VQCEVQLVESGGGVVQPGRSLRLSCAASGFTFDDYAMHWVRQAPGKGLEWVSRISWGGGS
TYYADSVKGLFTISRDNSKISLYLQMNSLRAEDTALYYCAKD
>V131RF-CABD02117467.1-ighv |(8162, 8468)|2.7419382801|(0.988,0.841,0.996)|-1
AQCEVQLVESGGGLVQPGGSLRPSCAASGFAFSSYVLHWVRRAPGKGLEWVSAIGTGGDT
YYADSVMGRFTISRDNAKKSLYLQMNSLIAEDMAVYYCAR
>V132RF-CABD02117467.1-ighv |(15696, 16005)|2.99899200002|(0.999,1.000,1.000)|-1
AHSQVQLVQSGAEVKKPGASVKVSCKASGYTFTSYYMHWVRQAPGQGLEWMGIINPSGGS
TSYAQKFQGRVTMTRDTSTSTVYMELSSLRSEDTAVYYCAR
>V133RF-CABD02117467.1-ighv |(19808, 20117)|2.98989600501|(0.998,0.993,0.999)|-1
AYSQMQLVQSGAEVKKTGASVKVSCKASGYTFTYRSLHWVRQAPGQALEWMGWITPYNGN
TNYAQKFQDRVTITRDRSMSTAYMELSSLRSEDTAVYYCAR
>V134RF-CABD02117471.1-ighv |(687, 996)|2.99199200002|(0.998,0.997,0.997)|-1
VQCDVQLVQSGGGLVQPGGSLRLSCAASGFTFSSYWMHWVRQAPGKGLEWVANIKKDGSG
KYYVDSVKGRFTISRDNAKNSLYLQMNSLRAEDTAVYYCAR
>V135RF-CABD02117473.1-ighv |(12286, 12601)|2.99899200002|(0.999,1.000,1.000)|-1
VQCEVQLVESGGGLVKPGGSLRLSCTASGFTFGDYTMSWVRQAPGKGLEWVGFIRSKAYG
GTTEYAASVKGRFTISRDDSKSIAYLQMNSLKTEDTAVYYCTT
>V136RF-CABD02117475.1-ighv |(8201, 8508)|2.52111950764|(0.914,0.955,0.755)|-1
VCAEVQLVQSAAEVKRPGESLRISCKGSGYSFTSYWIGWVRQMPGKGLEWMGIIYPGDSD
TRYSPSFQGQVTISADSSISTAYLQWSSLKASDTAMYYCA
>V137RF-CABD02117477.1-ighv |(2704, 3013)|2.994900005|(1.000,1.000,0.995)|-1
VQCEVQLVESGGGLVQPGGSLRLSCVASGFTFSSYAMSWVRQAPGKGLEWVSTISSTGGS
TWYPGSVKGRFTISRDNSKNTLYLQMNSLRAEDTAVYYCAK
>V138RF-CABD02117482.1-ighv |(11133, 11445)|2.99385601037|(1.000,0.994,1.000)|-1
VLSQVQLQESGPGLVKPSQTLSLTCTVSGGSISSGSYYWSWIRQPPGKGLEWIGYIYYSG
STNYNPSLKSRVTISVDTSKNQFSLKLSSVTAADTAVYYCAR
>V139RF-CABD02117482.1-ighv |(15935, 16229)|2.98875601537|(1.000,0.994,0.995)|-1
QLVQSGPEVKKPGASVKVSCKASGYTFTSSAMQWVRQAPGQGLEWIGWIIVGSGNTNYAQ
KFQGRVTITRDTSTSTAYMELSSLRSEDMAVYYCAA
>V140RF-CABD02117487.1-ighv |(1480, 1789)|3.0|(1.000,1.000,1.000)|-1
VQCEVQLVESGGGLVQPGGSLRLSCAASGFTFSSYHMSWVRQAPGKGLEWVSVIYSDGSS
TYYAASVKGRFTISRDNSKNTLYLQMNSLRAEDTAVYYCAR
>V141RF-CABD02117492.1-ighv |(7493, 7808)|2.99798400013|(1.000,1.000,0.998)|-1
VQCEVQLVESGGGLVQPGGSLRLSCAASGFTFSNYYKSWVCQAPGKGLEWVRFIRNKANG
GTTEYTTSVKGRFTISRDDSKSITYLQMNSLKTEDTAVYYCSR
>V142RF-CABD02117494.1-ighv |(3416, 3731)|3.0|(1.000,1.000,1.000)|-1
VQCEVQLLESGGGLVQPGGSLRLSCAASGFTFSDHYMDWVRQAPGKGLEWVGRIRNKANS
YTTEYAASVKGRFTISRDDSKNSLYLQMNSLKTEDTAVYYCTT
>V143RF-CABD02117499.1-ighv |(3042, 3351)|3.0|(1.000,1.000,1.000)|-1
VQCEVQLLESGGGLVQPGGSLRLSCAASGFTFSSYWMHWVRQAPGKGLEWVSRINSDGSS
TSYADSVKGRFTISRDNAKNTLYLQMNSLRAEDTAVYYCAR
>V144RF-CABD02117506.1-ighv |(3288, 3597)|2.99193200206|(0.999,0.995,0.998)|-1
TYSQVQLVQSGHEVKQPGASVKVSCKASGYSFTSYGMNWVRQAPGQGLEWMGWFNTYTGN
PTYAQGFTGRFVFSMDTSVSTAYLQISSLKAEDTAMYYCAR
>V145RF-CABD02117545.1-ighv |(2488, 2803)|2.9304040992|(0.976,0.969,0.986)|-1
VQCEVQLVESGGGLVQPGGSLRLSCAASGFTFSDHYRSWVRQAQGKGLELVGLIRNKANS
YTTEYAASGKGRFTISRGDSKNTLYLQMSSLKTEDLAVYYCAR
>V146RF-CABD02117766.1-ighv |(420, 729)|2.99699200002|(0.999,1.000,0.998)|-1
AHSQVQLVQSGAEVKKPGASVKVSCKASGYTFTDYYMHWVRQAPGQGLEWMGRINPNSGG
TNYTQKFQGRVTMTRDTSISTAYMELSRLRSEDTATYYCAR
>V147RF-CABD02117767.1-ighv |(2221, 2530)|2.99498000014|(0.998,0.997,1.000)|-1
AHSQVQLVQSGAEVKKPGASVKVSCKASGYTFTGYYMHWVRQAPGQGLEWMGWINPNSGG
TNYAQKFQGRVTMTRDTSISTAYMELSRLRSEDTATYYCTR
>V148RF-CABD02136430.1-ighv |(23813, 24119)|2.98070803341|(0.992,0.989,1.000)|-1
VQCEVHLVQSGGGLVQPGGSLRLSCAGSGFTFSSHAMHWVRQAPGKGLEWVSAIGTGGGT
YYADSVKGRFTISRDNAKNSLYLQMNSLRAEDMAVYYCAR
>V149RF-CABD02136430.1-ighv |(37941, 38248)|2.99899200002|(0.999,1.000,1.000)|-1
AQCEVQLVESGGGLVQPGGSLRLSCAASGFTFSNHYTSWVLQAPGKGLEWVSYISGDSDY
TNYADSVKGRFTISRDNAKNSLYLRMNSLRAEDTAVYYCV
>V150RF-CABD02196508.1-igkv |(4447, 4759)|2.48468234975|(0.939,0.925,0.752)|-1
CNGDIVLTQSPASLAMSPGQRATITCRASECVSFLGINLIHWYQQKPGQPPKLLIYQASN
KDIGVPARFSGSGSGTDFTLTINPVEANNTAKYYCLQSKNFP
>V151RF-CABD02196513.1-igkv |(3814, 4114)|2.99796800026|(0.998,1.000,1.000)|-1
AKCDIQMTQSPSTLSASVGDRVTITCRASQGISKLLAWYQQKPGKAPKLLIYAASSLESG
VPSRFSGSGSGTEFTLTISSLQPDDFATYYCQQHSSTP
>V152RF-CABD02196515.1-igkv |(8253, 8553)|2.97723755493|(1.000,0.979,1.000)|-1
ARCDIRMTQSPSSLSASVGDRVTITCRASQGIRNDLGWYQQKPGKAPKILIYAASSLQSG
VPSRFSGSGSGTDFTLTISSLQPEDFATYYCLQDYNYP
>V153RF-CABD02196517.1-igkv |(696, 995)|2.75540052227|(0.997,0.980,0.856)|-1
IVMTQSPATLSLSPGERATLSCRASQSVSSYLTWYQQKPGQAPRLLIYGASTRATGIPAR
FSGSGSGTDFTLTISSLQPEDFAVYYCQQHSNWPPTVI
>V154RF-CABD02196521.1-igkv |(5557, 5857)|3.0|(1.000,1.000,1.000)|-1
ARCDIQMTQSPSSLSASVGDRVTITCRASQGISKWLAWYQQKPGKAPKRLIYAASSLESG
VPSRFSGSGSGTEFTLTISSLQPEDFATYYCLQYNSYP
>V155RF-CABD02196542.1-igkv |(3007, 3305)|2.75726982916|(0.995,0.849,0.995)|-1
SRGEIVLTQSPDFQSVTPKEKVTITCRASQSIGSSLHWYQQKPDQSPKLLIKYASQSISG
VPSRFSGSGSGTDFTLTINSLEAEDAATYYCQQSSSL
>V156RF-CABD02196545.1-igkv |(4900, 5202)|2.37958834618|(0.954,0.720,0.910)|-1
SSGDIVMTQTPLSLPVTNGEPASISCRSSQSLVHSDGNTYLNWIQQRPGQPPRLLIYKVS
NRFSGVPDRFSGSGAGTDFTLKISRVEAEDVAVYYCTQG
>V157RF-CABD02196547.1-igkv |(2239, 2541)|2.9888720041|(0.999,0.995,0.995)|-1
SSGDVVMTQSPLSLPVTLGQPASISCRSSQSLVYSDGNTYLNWFQQKPGQSPRRLIYKVS
NRDSGVPDRFSGSGSGTDFTLEISRVEAEDVGVYYCMQG
>V158RF-CABD02196553.1-igkv |(790, 1090)|3.0|(1.000,1.000,1.000)|-1
ARCDIQLTQSPTSLSASVGDRVTITCQASQGISNNLAWYQQKPGKVPKLLIYSASSLQSG
VPSRFSGSGSGTDFTLTISSLQPEDVATYYCQRTYNAP
>V159RF-CABD02196556.1-igkv |(192, 492)|2.99899600001|(1.000,1.000,0.999)|-1
ARCDIQMTQSPSSLSASVGDRVTITCRASQSVSNYLSWYQQKPGKAPKLLIYAASSLQSG
VPSRFSGSGSGTDFTLTISSLQPEDFATYYCQHGYGTP
>V160RF-CABD02196559.1-igkv |(8610, 8928)|2.66256225323|(0.999,0.825,0.959)|-1
SSGDIVMTQTPLSLPVTPGQPASISCRSSQSLLDSDDGNTYLYWYLQKPGQSPQLLIYEV
SNRASGVPDRFSGSGSGTDFTLKISRVEAEDVGVYYCMQSRELP
>V161RF-CABD02196901.1-igkv |(2814, 3114)|2.99798400013|(1.000,0.998,1.000)|-1
DRCDIQMTQSPSSLSASVGGRVTITCRASQGISNNLNWYQQKPGKTPKLLIYAASSLQSG
IPSRFSDSGSGTDYTLTISSLQPEDFAAYYCQQSDSTP
>V162RF-CABD02196902.1-igkv |(2361, 2661)|2.1835708758|(0.943,0.872,0.661)|-1
AKCAIQMTQSPSSLPASTGDRVTITCQASQGIGSYLNWYQQKPGKSPKLLIYYASYLQSG
IPSRFSGSGSGTDFTLTIDCLQPEDFATYYCEQSYGTP
>V163RF-CABD02337338.1-trgv |(1057, 1370)|2.97868883957|(1.000,0.998,0.982)|-1
SQKSSNLEGRTKSVTRQTGSSAEITCDLTVTNTFYIHWYLHQEGKAPQRLLYYDVSTARD
VLESGLSSGKYYTHTPRRWSWILRLQNLIENDSGVYYCATWD
>V164RF-CABD02337338.1-trgv |(5430, 5730)|1.77172440608|(0.847,0.536,0.748)|-1
SQKSSNLEGRTKSVTRPPGSSAVITCDLPVENAAYIHWYLHQEGKAPQRLLYYDSYNSRV
VLESGISREKYHAYASTGKSLKFIVENLIEHDSGVYYC
>V165RF-CABD02337341.1-trgv |(2313, 2626)|2.97796052424|(0.999,0.997,0.983)|-1
SQKSSNLEGRTKSVIRQTGSSAEITCDLDGGSTGYIHWYLHQEGKAPQRLQYYDSYNSKV
VLESGVSPGKYYTYTSTRKNLRLILRNLIENDSGVYYCATWD
>V166RF-CABD02379427.1-igkv |(3027, 3327)|3.0|(1.000,1.000,1.000)|-1
ARCDIQMTQSPSSLSASVGGRVTITCRASQGISNNLNWYQQKPGKTPKLLIYAASSLQSG
IPSRFSDSGSGTDYTLTISSLQPEDFAAYYCQQSDSTP
>V167RF-CABD02379503.1-igkv |(6201, 6501)|2.99798400013|(1.000,0.998,1.000)|-1
ARCDIQMTQSPSSLSASVGGRVTITCRASQDISNNLNWYQQKPGKTPKLLIYAASSLQSG
IPSRFSDSGSGTDYTLTISSLQPEDFAAYYCQQSDSTP
>V0RF-ABDC01047890.1-ighv |(234, 540)|2.76727538434|(0.924,0.896,0.954)|1
VQCNVQLVESGGGLVQPGGSLTLSCAASRFTFSSYAMSWFRQAPGKGMEWVALIRNDGST
YYADAVKSEFTISRDNAKNKLYLQMNSLRAEDTALYYCAR
>V1RF-ABDC01116809.1-trbv |(1528, 1849)|1.87415124718|(0.733,0.884,0.516)|1
QVTQIPRYLITETGKKVTVTCSQNMNHEYMFWYRQDPGQGLKLVYYSVNVGFVTEGDVSE
GYTASRTERPSFPLNVESARASQTALHLCASSLYSLHSAAQPAAF
>V2RF-ABDC01116809.1-trbv |(7343, 7638)|2.40844940286|(0.838,0.848,0.752)|1
LVDAEVTQTPGHLIKRTGEKVLLECSQDMDHERMFWYRQDPGLGLRLIYFSFDVGSEEKG
DVWEAYSASRKQKDRFPLVLESAGTNQTSVYLCASR
>V3RF-ABDC01165520.1-igkv |(7469, 7769)|2.99899200002|(0.999,1.000,1.000)|1
ARCDIQMTQSPSSLAASVGDTVTISCRASQGISSWLSWHQQKPGKPPKTLINKASNLESG
VPSRFSGSGSGTDFTLTIKGLQPEDFATYYCQQYDSSP
>V4RF-ABDC01231268.1-ighv |(5361, 5667)|2.99899600001|(1.000,0.999,1.000)|1
VQCDVQLLESGGGLVQPGGSLRLSCAASGFTFSSYYMHWVRQAPGKGLEWVSTISSGGST
YYADAVKGRFTISRDNGKSSLYLQMNSLKAEDTAVYYCAR
>V5RF-ABDC01231269.1-ighv |(3071, 3380)|1.8747161934|(0.973,0.989,0.502)|1
AHSEVQLVQSGAEVKPPGASVKVSCKASGYTFTSYYMHWVRQAPGQGLEWEGRINPSSGE
TNYAQKFQGRVTMTRDTSTSTAYMELSSLRPEDTAVYYCAR
>V6RF-ABDC01231272.1-ighv |(378, 697)|2.96392188321|(0.994,1.000,0.972)|1
VQCEVQLVESGGGLVQPGGSLRLSCVASGFTLTSYGMNWVRQAPGKGLEWISYIYSSSTS
YADSVKGRFTISTDNGKNSLYLQMNSLRAEDTAMYYCARHTVRG
>V7RF-ABDC01231274.1-ighv |(17, 332)|2.99696400065|(1.000,1.000,0.997)|1
VQCEVQLVESGGGLAQPGGSLRLSCAASGFTFSSYYMYWVRQAPGKGLEWVGFVRNKANG
GTAEYAASVKGRFTISRDDSKSTAYLQMNSLRAEDTALYYCAR
>V8RF-ABDC01231277.1-ighv |(694, 1003)|2.99799600001|(0.999,0.999,1.000)|1
VQCEVQLAESGGGLVQPGGSLRLSCAASGFTFSNYYMYWVRQAPGKGLEWISTISNSGSS
TGYADSVKGRFTTSRDNSKNMLYLQMNSLKAEDTALYYCAR
>V9RF-ABDC01282056.1-ighv |(476, 782)|2.99080001921|(0.999,1.000,0.992)|1
VQCEVQLVESGGGLVQPGGSLKLSCAASGFTFSSYDMHWVRQAPGKGLEWVSVIGIGGST
YYADAMKGRFTISRDNGKNMLYLQMSSVQAEDTAVYYCTR
>V10RF-ABDC01282057.1-ighv |(6536, 6845)|2.99696400065|(1.000,1.000,0.997)|1
VQCEVQLVESGGGLVQPGGSLRLSCAASGFTFSSYWMYWVRQAPGKGLEWVSRINPDGGS
TNYADAVKGRFTISRDNGKNTLYLQMNSLKAEDTAVYYCAR
>V11RF-ABDC01282063.1-ighv |(1659, 1962)|2.63947015123|(0.948,0.798,0.985)|1
VQCEEQLVESGGGLVQPGGSLRLSCAASGFSFDDYVMHWIRQAPGKGLEWISYIYSSSTS
YADSVKGRFTISSDNGKNMLYLQMNSLRAEDTAMYYCAR
>V12RF-ABDC01282065.1-ighv |(718, 1027)|2.9618099056|(0.978,1.000,0.986)|1
VQCEVQLVESGGGLVPPGGSLRLSCAASGFTFSDYWMSWIRQAPGKGLEWVGEINGDGGN
TNYADAMKGRFTISRDNSKNTLYLQMNSLRAKDTAVYYCGR
>V13RF-ABDC01296165.1-iglv |(3112, 3422)|2.33910019321|(0.844,0.791,0.750)|1
SLSQPVVTQPPSLSASPGASARLTCTLSSGFSVGSYAISWHQQKPGSPPRYLLYYHTDSN
KHQGSGVPSRFSGSKDASANAGILHVSGLQPEDEADYYCAV
>V14RF-ABDC01296165.1-iglv |(8050, 8360)|2.99186400565|(1.000,0.997,0.995)|1
SLANFVLTQPSSVSGSPGQKVTISCTRSSGNIGSNYVHWYQQRPGSAPTTVIYRDDKRPS
GVPDRFSGSSDSSSNSASLTISGLQSEDEADYYCQSYDASA
>V15RF-ABDC01296166.1-iglv |(4596, 4906)|2.38156559587|(0.848,0.791,0.776)|1
SLSQPVVTQPPSLSASPGASARLTCTLSSGFSVGSYAISWHQQKPGSPPRYLLYYHTDSD
KHQGSGVPSRFSGSKDASANAGILHVSGLQPEDEADYYCAV
>V16RF-ABDC01296168.1-iglv |(909, 1230)|1.98338491941|(0.928,0.568,0.896)|1
SLSQPVLTQPPSASASPGASAKLTCTLSSGYSNYGIAWHQQHPEKSPRYLMYVYSDGSQS
KGDGIPDRFSGSSSGADRYLTISNVQPEDEADYYCQTWDGGVNHS
>V17RF-ABDC01314388.1-ighv |(6282, 6597)|2.98410021834|(0.988,1.000,0.997)|1
VQCEVQLVESGGGLVQPGGSLKLSCAASGLTFSDYWMSWIRQAPGKGLEWAGLNRSKAYG
GIAEYAASVKDRFTISRDDSKSTAYLQMNSLKAKDTALYYCVR
>V18RF-ABDC01318810.1-iglv |(15156, 15463)|2.98480001921|(0.993,1.000,0.992)|1
SWAQSALTQPPSVSGAPGETVTISCSGSSSNIGGYDANWYQQLPGTAPKLLIYGNSNRPS
GVPARFSGSKSGSSASLTIAGLQAEDEGDYYCSSWDSSLS
>V19RF-ABDC01318812.1-iglv |(1658, 1965)|2.22159835383|(0.989,0.683,0.896)|1
SWAQSALTQPPSVSGAPGQSVTISCLGSNSNIGGNYANWYQQLPGTAPKTLIYANSNRPS
GVPARFSGSKSGSSASLTITELQAEDEADYYCSAWDDSLS
>V20RF-ABDC01339850.1-iglv |(5825, 6125)|1.89545393909|(0.630,0.958,0.661)|1
SVASQLTQVPAVSVALGQTASITCQGDGIRSYYANWYQQKPGQAPVLLIYSDNNRPSGIP
ERSSGSNSGNMATLTMNRAQADDEGDYHCQSFDSRGTL
>V21RF-ABDC01342328.1-iglv |(7715, 8025)|1.80401623602|(0.843,0.525,0.783)|1
SLSQPAVTQLPSLSASPGASARLTCTLRSDISVGGKYVYWHQQKPGSPPRYLLYYYSDSN
KHQGSGVPSRFSGSKDTSANAGILHVSGLQPEDEADYYCAM
>V22RF-ABDC01342328.1-iglv |(12642, 12952)|2.89560549808|(0.990,0.996,0.926)|1
SLANFFLTQPSSVSGSPGQKVTISCTRSSGNIGSNYVHWYQQRPGSAPSTVIYEYNKRPS
GVPDRFSGSMDSSSNSASLTISGLQSEDEADYYCQSYDGSY
>V23RF-ABDC01347843.1-iglv |(8431, 8731)|2.60042597125|(0.887,0.838,0.885)|1
SVASQPNQVPAVSVALGQTASITCQGDGLRSYYPGWYQQKPGQAPVLVFYGNNKRPSGIP
ERFSGSKSGNTAMLTISGAQADDEADYYCQTWDSTGTH
>V24RF-ABDC01347844.1-iglv |(5493, 5791)|2.48607541711|(0.942,0.733,0.976)|1
SVASQLTQVPAVSVALGQTARITCQGDSLRSYYANWYQQKPGQAPVLLIYGDNQRPSGIP
ERFSGSKSGNTATLTVSGAQVEDEADYYCGSYAGSGT
>V25RF-ABDC01349227.1-iglv |(6289, 6580)|2.93868832739|(0.993,0.983,0.966)|1
SVASQVTQVPAVSVALGQTARITCQGDSLSSYYPGWYQQKPSQAPVLVVYGNNERPSGIP
ERFSGSKSGNTATLTISGAQVEDEADYYCGSYAGS
>V26RF-ABDC01349230.1-iglv |(865, 1165)|2.99092000218|(0.999,0.997,0.995)|1
SVASQLTQVPAVSVALGQTASITCQGDGLSSDYANWYQQKPGQAPVLLIYGENQRPSGIP
ERFSSSDSGDTATLTISGAQAGDEADYYCQVWDSENNK
>V27RF-ABDC01351831.1-igkv |(554, 852)|2.42917194745|(0.771,0.958,0.946)|1
TRCDIQVTQSPSSVSASPGDTVTISCRASQDISNRLSWYQQKPGKPPKALIYVASNLHSG
VSSRFSGSGSGTDYSLTIRGLETDDAATYFCRQYKIN
>V28RF-ABDC01351832.1-igkv |(2497, 2812)|2.4666580855|(0.988,0.747,0.946)|1
SSGDVVMTQTPVSLPVTPGEPASISCRSSQSLLHSDGKTYLYWYLQKPGQSPQLLIYLGF
TRASGVPDRFSGSGSGTDFTLKISKVEAEDVGVYYCMQAIQPP
>V29RF-ABDC01351835.1-igkv |(461, 776)|2.63677404596|(0.996,0.795,0.995)|1
SNGEIVMTQTPLSLPVTPGEPASISCRSSQSLLHSDGNTYLHWYLQKPGQSPQLLIYRVS
NRFSGVPDRFSGSGSGTDFTLKISRVEAEDVGVYYCMQGTQTP
>V30RF-ABDC01351837.1-igkv |(5117, 5415)|2.40344949955|(0.761,0.944,0.920)|1
TRCDIQVTQSPSSMSVSPGDTVTISCRASQDISNRLSWYQQKPGKPPKPLIYVASNLHSG
VSSRFSGSGSGTDYSLTIRSLETDDAATYFCRQYKNN
>V31RF-ABDC01351837.1-igkv |(9264, 9579)|2.96216889635|(0.978,0.991,0.995)|1
SSGDVVMTQTPLSLSVTPGESASISCRASQSIQDSDGNTYLNWFLQKPGQPPRRLIHKVS
NRDSGVSDGFSGSGSGTDFTLKISRVEAEDVGVYYCMQASYFP
>V32RF-ABDC01352111.1-iglv |(14382, 14693)|1.79732853128|(0.989,0.567,0.838)|1
SWAQSALTQPPSVSGAPGQSVTISCLGSSSNIGGGYVVHWYQQLPGTAPKLLIYGGSGRP
SGVPARFSGSKSGSSASLTIAGLQAKDEADYYCQSYDSSLDA
>V33RF-ABDC01352115.1-iglv |(760, 1076)|2.08056221321|(0.928,0.618,0.868)|1
SLSQPVLTQPPSASASPGASAKLTCTLSSGHSNYGITWHQQQPGKAPRYLMYVYSDGSQS
KGDGVPDRFSGSSSGADRYLTISNVQPEDEADYYCQTADSSGV
>V34RF-ABDC01359388.1-iglv |(1496, 1806)|2.98309640489|(1.000,0.985,0.999)|1
SLANFVLTQPSSVSGSPGQKVTVSCTRSSGNIGSNYVYWYQQRPGSAPTTVIYRDDQRPS
GVPDRFSGSIDSSSNSASLTISGLQSEDEADYYCQSYDGSA
>V35RF-ABDC01360510.1-igkv |(1890, 2205)|2.47529157576|(0.867,0.904,0.757)|1
SSGDIVMTQTPLSLPVTPGEPASISCRSSQSLLHSNGNTYLQWYLQKPGQSPQPLIYRVS
NRFSGVPDRFSGSGAGTDFTLKISRVEAADVGVYYCMQGIQFP
>V36RF-ABDC01360510.1-igkv |(9535, 9833)|2.31571774549|(0.742,0.925,0.986)|1
IRCDIQMTQSPSSLAASPGETVTISCRASQGINRNLAWYQHKPGNAPKRLIYGASNLQSG
VSSRFSGSGSGTDYSLTIRGLETDDVATYFCHQYNSN
>V37RF-ABDC01360510.1-igkv |(13925, 14240)|2.47587028286|(0.976,0.743,0.954)|1
SRGDIVMTQTPVSLPVTPGEPASISCRSSQSLLHSNGKTYLQWFLQKPGQSPQLLIYLGF
TRASGVPDRFSGSGSGTDFTLKISKVEAEDVGVYYCMQTIQLP
>V38RF-ABDC01360666.1-igkv |(4785, 5100)|2.98393200206|(0.993,0.997,0.994)|1
SSGDIVMTQTPLSLPVTPGESASISCRSSQSLLHSDGKTYLQWFLQKPGQSPQLLIYLGF
TRASGVPDRFSGSGSGTDFTLKISKVEAEDVGVYYCMQTIQFP
>V39RF-ABDC01360670.1-igkv |(1063, 1378)|2.12445444797|(0.891,0.630,0.849)|1
SSGDIVMTQTPLSLPVTPGEPASISCRASESLLDSDGKTYLYWFLQKPGQPPRRLIYQVS
NRDSGVSDRFSGSGSGTDFTLKISRVEAEDVGVYYCAQATKLP
>V40RF-ABDC01363519.1-trav |(2177, 2465)|1.81405114851|(0.637,0.624,0.571)|1
SLSLAKTTQPIAMESYEGQEVNIPCSHTDIATSETIFWYQQFPNQGPRFIIQGYKTNVTN
EVASLFIPADRKSSTLSLSRAALSDSAVYYCILD
>V41RF-ABDC01369760.1-iglv |(2306, 2610)|1.62060898255|(0.520,0.657,0.516)|1
TSQEVVTQETSLLTTPGGTVTLTCGSSTGAVTTSNYANWVQQGSNEVPRGLIYGTSNRYP
GVPARFSGSLLGDKAALTITGAQAEDEAEYYCALWFSNH
>V42RF-ABDC01373300.1-ighv |(1180, 1499)|2.96625728969|(0.994,1.000,0.974)|1
VQCEVQLVESGGGLVQPGGSLRLSCVASGFTLTSYGMNWVRQAPGKGLEWISYIYSSSTS
YADSVKGRFTISTDNGKNTLYLQMNSLRAEDTAMYYCARHTVRG
>V43RF-ABDC01373301.1-ighv |(8478, 8785)|2.99593600205|(1.000,1.000,0.996)|1
VQCEVQLVESGGGLVQPGGSLRLSCAASGFTFSSYYMHWVRQAPGKGLEWVSRINPDGGS
TIYADAVKGRFTISRDNSKNSLYLQMNSLKAEDTAVYYCA
>V44RF-ABDC01375549.1-ighv |(174, 483)|3.0|(1.000,1.000,1.000)|1
VQCEVQLVESGGGLVQPGGSLRLSCAASGFTFSSYWMNWVRQAPGKGLEWVADINGDGGS
TNYADAVKGRFTISRDNAKNSLYLQMNSLRAEDTALYYCAT
>V45RF-ABDC01375549.1-ighv |(8525, 8840)|2.99393200206|(0.999,1.000,0.995)|1
VQCEVQLVESGGGLVQPGGSLKLSCVASGFTFSDYYMHWVRQAPGKGLEWVAFIRNKANG
GTAEYAASVKGRFTISRDDSKSTAYLQMNSLRTEDTAVYYCER
>V46RF-ABDC01377237.1-ighv |(8637, 8946)|2.99899600001|(1.000,0.999,1.000)|1
VQCDVQLVESGGGLVQPGGSLRLSCAASGFTFSSYWMYWVRQAPGKGLEWVSAISGNGGS
TYYADAVKGRFTISRDNGKNTLYLQMNSLKAEDTAVYYCAR
>V47RF-ABDC01377653.1-trav |(1660, 1950)|2.96594800078|(0.987,0.989,0.990)|1
MSRGEKLEQSPFLSVQEGDSSVINCTYTETTSTYFYWYKQGPREGLQLIMTIFSYEDKKQ
ERRLSVLLNKMEKHLSLHISDTQPADSAVYFCAVS
>V48RF-ABDC01377655.1-trav |(2230, 2518)|2.36805337278|(0.750,0.838,0.849)|1
VHSQKIEQNPWALSIQEGETAAVTCNYTSYSPAFFQWYRQDPEKGLVFLLLIRENEGEKQ
EGRLKVTFDTKLKQSSFYIADSQPADSAAYLCAA
>V49RF-ABDC01377657.1-trav |(531, 828)|1.86397903341|(0.743,0.713,0.550)|1
DAGAQSVTQPDGHVTVSEEHSLELRCNYSYGGAFYLFWYVQYPGHGLQLLLRYFSGDTLV
KGIKGFEAELRKNESSFTLRKPRVHWSDTAEYFCALS
>V50RF-ABDC01379531.1-trav |(895, 1198)|2.94684837921|(0.993,0.961,0.997)|1
SGMAQKVTQSQPAMWVQEKEAVTLDCTYDTRDSTYYLFWYKQPSSGEMILLIRQDSYNQQ
NATEGRYSLNFQKASKSIKLVISASQVGDSAIYFCALSE
>V51RF-ABDC01379531.1-trav |(6655, 6946)|2.9929000027|(1.000,0.996,0.997)|1
VRSQQKEVDQTPEFLSVSEGAMASLNCTYSNTASRYFFWYRQYSGKGPELLVSIFSTGDK
QEGRFTAQLNKASRYVSLVIRDSQPSDSATYLCAL
>V52RF-ABDC01384522.1-iglv |(5368, 5671)|1.89509050123|(0.959,0.527,0.937)|1
AVSPYELTQPPSVSVTPGQTARIPCSGDKLGEKYVYWYQQKPGQAPVLVIYKDSERPSGI
PERFSGSSSGNTAALTISGAQAGDEADYYCHVWDSSSDH
>V53RF-ABDC01384523.1-iglv |(1675, 1975)|2.99598000014|(0.999,0.997,1.000)|1
SVASQLTQVPAVSVALGQTASITCQGDGLSSDYANWYQQKPGQAPVLLIYGENQRPSGIP
ERFSSSVSGDTATLTISGAQAGDEADYYCQVWDSENNK
>V54RF-ABDC01388284.1-trav |(3312, 3602)|2.94876429988|(0.990,0.963,0.999)|1
VRSQQVVEQTPESLVVSEGTTASLSCTYSDTASQSFLWYRQYSGKGPELLMFIYSTGDKE
EGRFTAQLNKASRNVSLLIRDSQPSDSATYLCAVS
>V55RF-ABDC01388284.1-trav |(7133, 7430)|2.56461051925|(0.891,0.829,0.863)|1
GTWAQRVTQPDGHITVSEGDPLELRCNYSSSVSPYLFWYVQYPNQGLELLLKYTSGNSLV
TGIKSFKAEFNKGETSFHLKKASAHLSDSAQYFCAVS
>V56RF-ABDC01388286.1-trav |(1105, 1402)|2.08140708421|(0.875,0.925,0.582)|1
DTRAQSVTQPDGHVTVFEGDSVELRCNYSYGATPYLFWYVQYPGQGLQLLLQYYSGNTLV
QGIKGFEAEVRKDESSFTLRKPRVHWSDTAEYFCALS
>V57RF-ABDC01391612.1-ighv |(2185, 2509)|2.76718588966|(0.925,0.948,0.899)|1
AHSEVQLVQSGAEVKPPGASVKVSCKASGYTFTSYAMHWVRQAPGQGLEYMGWINTNTGG
TSYAQKFQGRVTMTRDTSTSTAYMELSSLRPEDTAVYYCARDTVLQ
>V58RF-ABDC01393119.1-trav |(29, 326)|2.08140708421|(0.875,0.925,0.582)|1
DTRAQSVTQPDGHVTVFEGDSVELRCNYSYGATPYLFWYVQYPGQGLQLLLQYYSGNTLV
QGIKGFEAEVRKDESSFTLRKPRVHWSDTAEYFCALS
>V59RF-ABDC01394567.1-igkv |(5428, 5726)|2.97348806553|(0.986,0.994,0.994)|1
TRCDIQMTQSPSSVSASPGETVTISCRASQGINNNLVWYQHKPGKPPKSLIYGASNLYPG
VLSRFSGSGSGTDYSLTIRGLETDDAATYYCQQYNSF
>V60RF-ABDC01394567.1-igkv |(9543, 9858)|2.77652683325|(0.954,0.884,0.958)|1
SSGDVVMTQTPLSLPVTPGESVSITCRASQSLQDSDGNTYLNWVLQKPGQPPKRLIYKVS
NGDNGVSDRFSGSGSGTDFTLKISRVEAEDVGVYYCMQASYFP
>V61RF-ABDC01396012.1-igkv |(1397, 1712)|2.49317723355|(0.988,0.769,0.926)|1
SSGEIVMTQSPLSLPVTPGEPASISCRSSQSLLHSNGNTYLQWFLQKPGQSPQLLIYLGF
TRASGVPDRFSGSGSGTDFTLKISRVEAEDVGVYYCMQAIQYP
>V62RF-ABDC01398089.1-iglv |(1263, 1573)|2.54531007134|(0.946,0.841,0.843)|1
SLANLVLTQPSSVSGSPGQKVTISCTRSSGDIGGYYVHWHQQRPGSAPTTVIYEDNERPS
GVPDRFSGSIDSSSNSASLTISGLQSEDEADYYCQSYDDSC
>V63RF-ABDC01398089.1-iglv |(8544, 8868)|2.42757816242|(0.858,0.809,0.789)|1
SLSQPVLTQPPSLSASLGASAGLTCTLSSGTVVGGYHISWYQQKPGGPPRYLLRYYSDSD
KHQGSGVPSHFSGSKDASANAGILQVSRLQPEDEADYYCMTYHANS
>V64RF-ABDC01399103.1-trbv |(74, 387)|2.27405616613|(0.886,0.686,0.854)|1
PLDTAVFQTPKYLLTQTGNDVSLKCEQTLGYDTMYWYKQDSTKLLKIMFIYSNKEKILNE
TASNRFSPESPDKAHLNLHINSPEPGDSAVYLCASSYDTALQ
>V65RF-ABDC01399713.1-iglv |(4883, 5179)|2.20723855945|(0.988,0.661,0.923)|1
SWAQSALTQPPSVSGAPGQSVTISCSNIKGSYAHWYQQLPGTAPKLLIYYNSDRASGVPA
RFSGSKSGSSASLTIAGLQAEDEADYYCQSYDSSLDA
>V66RF-ABDC01405194.1-trbv |(1647, 1949)|2.18132060986|(0.887,0.829,0.662)|1
AGVTQTPGHLIRARGQQMTLKCFPVSGHNRVYWYQQTPGQGLQFLIEYYNGEQGQKENIS
PRFSGHQFSDYRSELNLSALELGDSALYLCASSFHSPAE
>V67RF-ABDC01405197.1-trbv |(141, 429)|2.52300144232|(0.812,0.894,0.849)|1
AMVMQNPRYQVTRVGKTVTLSCSQNMNHDTMYWYQQKLSQAPKLLFYYYDTEFNNETDTS
YNFQPSRPNTSFSSVDIRSPGLGDSAVYLCASSR
>V68RF-ABDC01407894.1-ighv |(4990, 5305)|2.99899600001|(1.000,1.000,0.999)|1
VQCEVQLVESGGGLAQPGGSLRLSCAASGFTFSDYYMSWVRQAPGKGLEWVGFIRNKANG
GTAEYAASVKGRFTISRDDSKSTTYLQMNSLRAEDTALYYCAR
>V69RF-ABDC01410282.1-trav |(2484, 2790)|1.6009561346|(0.549,0.826,0.929)|1
SGMSQQIIQPQLAISKQEGETVELECSYDTSVPYHILYWYKRPPSGEIIYLIHHRIDADT
NATTQGRYSVSFQKATKTIRLIISSSQPEDSATYFCCLRQ
>V70RF-ABDC01417489.1-ighv |(3793, 4108)|3.0|(1.000,1.000,1.000)|1
VQCEVQLVESGGGLAQPGGSLRLSCAASGFTFSDYYMNWVRQAPGKGLEWVGVIRNKANG
GTAEYAASVKGRFTISRDDSKSTAYLQMNSLRAEDTALYYCAR
>V71RF-ABDC01417539.1-iglv |(3342, 3652)|2.95681341387|(1.000,0.998,0.964)|1
SLANIVLTQPSSVSGSPGQKVTLSCTRSSGDIGSSYVSWYQQRPGSAPTTVIYEDNERPS
GVPDRFSGSIDSSSNSASLTISALQSEDEADYYCQSYDDSY
>V72RF-ABDC01418168.1-iglv |(580, 890)|2.08803316534|(0.943,0.684,0.788)|1
SLSQPVVTQPPSLSASPGASARLTCTLRSDISVGGKDMYWYQQKPGSPPRYLLYYYSDSN
KHQGSGVPSRFSGSKDASANAGILHVSGLQPEDEADYYCAV
>V73RF-ABDC01418168.1-iglv |(5505, 5817)|2.95982866804|(0.992,0.994,0.975)|1
SLANLVLTQPSSVSGSPGQKVTISCTRSSGDIGDAYVTWYQQRPGSAPTTVIIGDDQRPS
RVPDRFSGSIDSSSNSASLTISGLQSEDEADYYCQSYGIRNS
>V74RF-ABDC01418428.1-trav |(328, 621)|2.97295304822|(0.981,0.997,0.997)|1
VRGGENVGLHPPTLSVQEGDTSVINCSYSDSASSYLLWYKQKLGKSPQSIIDIRSNMGKK
QKGRFTVFLSKTAKHLSLHIAATQPGDSAVYFCAES
>V75RF-ABDC01421861.1-ighv |(7067, 7376)|2.99193600205|(0.996,0.996,1.000)|1
VQCEVQLLESGGGLVQPGGSLRLSCAASGFTFSSYYMSWVRQAPRKGLEWVSYINGDGGY
TNYADAVKGRFTISRDNSKNSLYLQMNNLKAEDTAMYYCAR
>V76RF-ABDC01422153.1-iglv |(2569, 2876)|2.99494800078|(1.000,0.998,0.997)|1
SWAQSALTQPPSASGAPGQSVTISCSGSSSNIGGNYANWYQQLPGTAPKLLIYGNSDRPS
GVPARFSGSKSGSSASLTIAGLQAEDEGDYYCSSWDDSLS
>V77RF-ABDC01423814.1-ighv |(3316, 3625)|3.0|(1.000,1.000,1.000)|1
VQCEVQLVESGGGLVQPGGSLRLSCAASGFTFSSYAMSWVRQAPGKGLEWVSTISNGGGS
TYYTDAVKGRFTISRDNSKNSLYLQMNSLRAEDTALYYCAR
>V78RF-ABDC01436920.1-trav |(1407, 1731)|2.48763148989|(0.789,0.874,0.910)|1
VSGQNQVEQSPQSLIILEGENGTLQCNHTVSPFNNLRWYKQETGKGPVSLIIMTYSKNKE
SKGRYTATLDANTKQSSLHVTASQLSDSASYICVVSALCFPGTDSQ
>V79RF-ABDC01437312.1-trav |(895, 1195)|2.02062192079|(0.636,0.846,0.781)|1
STVAQKVTQAQPATSMTVGQAVILNCQYETSWPQYYIYWYKQIPSKEMIFLLRQGSTRPS
EKSGRYSLNFEKEDKSINLTISALRLEDSAKYYCALQE
>V80RF-ABDC01440241.1-trav |(2301, 2594)|2.50459485347|(0.865,0.759,0.960)|1
VRGGENVGLHPPTLSVQEGDTSVINCSYSNSASIYFSWYKKELGKGPQFIIDIRSNRDKK
EEQRFTIFVNKTVKHLSLHIAGTQPGDSAVYFCAES
>V81RF-ABDC01442374.1-iglv |(1223, 1533)|2.98767605248|(0.999,0.990,0.999)|1
SLTNLVLTQPNSVSGSPGQKVTISCTRSTGSIGGYFVHWYQQRPGSAPTTVIYADDQRPS
GVPDRFSGSIDSSSNSASLTISGLQSEDEADYYCQSYDDSY
>V82RF-ABDC01445022.1-trav |(2658, 2952)|2.95500028092|(0.978,0.987,0.991)|1
SVTQTEGQMLLTERDSLIVNCSYETSQYPSLFWYVQYPGEGPQLLLKAMKANDKGINKGF
EATYNRETTSFHLQKASVHESDSAVYYCALSDTVTG
>V83RF-ABDC01446518.1-igkv |(1290, 1603)|2.58286208414|(0.965,0.901,0.817)|1
SSGDVVMTQTPLSLPVTPGESASISCRASQSLLYSDGNTYLNWFLQKPGQPPKLLIYKIS
NRDSGVSDRFSGSGSGTDFTLKISRVEAEDVGVYYCTQGTKL
>V84RF-ABDC01449636.1-iglv |(4939, 5239)|2.99699200002|(0.999,0.998,1.000)|1
SVASQLTQVPAVSVALGQTARITCQGDSLSSYYPNWYQQKPGQAPVLLIYGENQRPSGIP
ERFSSSVSGDTATLTISGAQAGDEADYYCQVWDSENNK
>V85RF-ABDC01454767.1-ighv |(1191, 1500)|3.0|(1.000,1.000,1.000)|1
VQCEVQLVESGGGLVQPGGSLRLSCAASGFTFSSYWMNWVRQAPGKGLEWVADINGDGGS
TNYADAVKGRFTISRDNAKNSLYLQMNSLRAEDTALYYCAT
>V86RF-ABDC01466438.1-iglv |(4568, 4875)|2.99494800078|(1.000,0.998,0.997)|1
SWAQSALTQPPSASGAPGQSVTISCSGSSSNIGGNYANWYQQLPGTAPKLLIYGNSDRPS
GVPARFSGSKSGSSASLTIAGLQAEDEGDYYCSSWDDSLS
>V87RF-ABDC01472745.1-igkv |(710, 1025)|1.83337726188|(0.851,0.597,0.700)|1
SSGDVVMTQTPLSLPVTPGELASISCRASESLLYSDGNTYLNWFVQKPGQPPKRLIYKVS
NRDNGVSDRFSGSGSGTDFTLKISRVEAEDVGVYYCVQGTKLP
>V88RF-ABDC01487737.1-trbv |(1203, 1500)|1.90803018024|(0.946,0.896,0.547)|1
SVTAGVTQTPRFQILKTGQNTTLTCTQDTNHEEMYWYRQDPGLGLRLIYYSVGVGITEKG
QVYNGYNVSRSSTETFPLTLESATPSQTSGYFCASSE
>V89RF-ABDC01488042.1-igkv |(970, 1286)|2.06453005449|(0.693,0.644,0.750)|1
SLSQPVLTQPPSASASPGASAKLTCTLSSAHSGYTIAWHQQQPGKAPRYLMRVYSDGSQS
KGDGIPDRFSGSSSGADRYLTISNVQPEDEADYYCQTGDSSGV
>V90RF-ABDC01490559.1-trbv |(1388, 1679)|2.69064084149|(0.890,0.894,0.908)|1
AGVSQSPRHKVTERGQNVTLSCDPISGHNVLYWYRQTLGQGPQYLVYFQGREATDKSGLR
SERISAERPEGSFSTLKIQLAEQGDSAVYLCASSL
>V91RF-ABDC01491653.1-trav |(356, 647)|2.9929000027|(1.000,0.996,0.997)|1
VRSQQKEVDQTPEFLSVSEGAMASLNCTYSNTASRYFFWYRQYSGKGPELLVSIFSTGDK
QEGRFTAQLNKASRYVSLVIRDSQPSDSATYLCAL
>V92RF-ABDC01492430.1-ighv |(1622, 1908)|1.75612777645|(0.704,0.551,0.619)|1
EVRPPGASVKVSCKASGYTFTSYYMYWMKQAPGQGLEWMRRIDPEDGSTRYAQKFQGRVT
MTATTSTNTAFMELSNLRPEDTAVYYCARHSVT
>V93RF-ABDC01497734.1-trdv |(531, 837)|2.90491739643|(0.966,0.986,0.955)|1
STVAQKVTQVETARSTTVGAVVTLNCQYETSGGAYFFIFWYKQLPSKEMIFLLRQGSDLY
NAKDDQRYSVNFQEEANSIDLTISALRLEDSAKYFCALAE
>V94RF-ABDC01498106.1-iglv |(348, 644)|2.20723855945|(0.988,0.661,0.923)|1
SWAQSALTQPPSVSGAPGQSVTISCSNIKGSYAHWYQQLPGTAPKLLIYYNSDRASGVPA
RFSGSKSGSSASLTIAGLQAEDEADYYCQSYDSSLDA
>V95RF-ABDC01519549.1-trav |(483, 780)|1.85962858774|(0.882,0.836,0.534)|1
DARAQSVTQTDGHVTVFEGDSVELRCNYSYGATPYLFWYVQYPGQGLQLLLQYYSGNTLV
QGIKGFKAEFRKNESSFTLRKPRVHWSDTAEYFCALS
>V96RF-ABDC01522041.1-igkv |(82, 382)|2.99899200002|(0.999,1.000,1.000)|1
ARCDIQMTQSPSSLAASVGDTVTISCRASQGISSWLSWHQQKPGKPPKTLINKASNLESG
VPSRFSGSGSGTDFTLTIKGLQPEDFATYYCQQYDSSP
>V97RF-ABDC01523330.1-igkv |(1251, 1566)|2.48024629244|(0.983,0.742,0.964)|1
SSGEIVMTQSPLSLPVTPGEPASISCRSSQSLLHSNGNTYLYWFLQKPGQSPQPLIYLVS
NRFSGVSDRFSGSGSGTDFTLKISRVEAEDVGVYYCMQDLQTP
>V98RF-ABDC01526110.1-trav |(609, 906)|1.86397903341|(0.743,0.713,0.550)|1
DAGAQSVTQPDGHVTVSEEHSLELRCNYSYGGAFYLFWYVQYPGHGLQLLLRYFSGDTLV
KGIKGFEAELRKNESSFTLRKPRVHWSDTAEYFCALS
>V99RF-ABDC01527872.1-trbv |(327, 624)|2.62968630922|(0.900,0.878,0.860)|1
PLDTAVFQTPKYLLTQTGNNVSLKCGQTLGHDNMYWYKQDATKLLKIMFSYNNQELMVNE
TASNRFSPESPDKAHLNLHINSPEPGDSAVYLCASSD
>V100RF-ABDC01533414.1-trav |(231, 518)|2.57583704999|(0.831,0.878,0.889)|1
VNSQQGEENLQALSIQEGENATINCSYTSSINNLQWYRQDAGRGPTLLILIRANKREERH
GRLTATLNPSIKSSSLIITASCAADTATYFCATD
>V101RF-ABDC01533415.1-trav |(1221, 1515)|2.98492000218|(0.993,0.997,0.995)|1
GTDGDSVTQTEGPVTLPEGEALTLNCTYQSNYAAFLFWYVQFQNKEPELLLKSSSETQET
DGRGFQANNNKSDSSFHLKKPSVQLSDSAVYFCAMR
>V102RF-ABDC01542818.1-trav |(328, 615)|2.96148712253|(0.997,0.972,0.995)|1
VSSEDKVVQSPPSMAVHEGDSATLTCNYVVSYFRSLQWYKQEKNAPVFLFTLTSSGIEKK
SGRFSSILDNKELSTLNITATQTGDSAIYFCAVE
>V103RF-ABDC01543158.1-trav |(548, 845)|1.78401990713|(0.763,0.619,0.592)|1
LNGQQVKQIPEFLHIQEGEDFSIYCNSTSTLTTAQWYKQRPGGSPVLLMILVKDGEVKEK
RLTAQFVETRKGSSLHITAAQTADVGTYFCAVAQCSP
>V104RF-ABDC01556235.1-iglv |(1158, 1468)|2.14781408781|(0.841,0.791,0.655)|1
SLSQPVVTQPPSLSASPGASARLTCTLSSGFSVGSYAISWHQQKPGSPPRYLLYYHTDSD
KHQGSGVPSRFSGSKDALANAGILHVSGLQPEDEADYYCAV
>V105RF-ABDC01570800.1-iglv |(151, 463)|2.74296245654|(0.943,0.964,0.863)|1
SLANLVLTQPSSVSGSPGQKVTISCTRSSGDIGDAYVNWYQQRPGSAPTTVIYGDDQRPP
RVPDRFSGSIDSSSNSASLTISGLQSEDEGDYYCQSYGIRNS
>V106RF-ABDC01583217.1-igkv |(589, 904)|2.7745050076|(0.995,0.882,0.954)|1
SSGDIVMTQTPLSLPVTPGEPASISCRSSQSLLHSDGKTYLYWYLQKPGQSPQLLIYLGF
TRASGVPDRFSGSGSGTDFTLKISKVEAEDVGVYYCMQTIQLP
>V107RF-ABDC01598575.1-trbv |(504, 790)|2.33673620375|(0.789,0.716,0.907)|1
AGVTQTPGHLITARGQQVTLKCSPVSGHPSVFWYKQALGEGPQFLIQYYEEKESDKGNFP
ARFSGHQFSDYRSELNLSALELGDSALYLCASS
>V108RF-ABDC01599688.1-igkv |(938, 1236)|2.25855741524|(0.963,0.992,0.643)|1
IRCDIQMTQSPSSLAASPGETVTISCRASQGISNYLSWYQQKPGKPPKSLIYGASNLHSG
VSSRFSGSGSGTDYSLTIRGLETDDAATYYCQQGHSY
>V109RF-ABDC01281089.1-trbv |(2653, 2950)|2.5667724743|(0.857,0.880,0.834)|-1
PMDTGVTQTPRHLVMGMTDKKSLECGQNLEHNAMYWYKQSAKKALEPLFIFNYKKLYENV
TVPSRFTPEYQDNAHFYLHLDALQPEDSATYLCASSQ
>V110RF-ABDC01281093.1-trbv |(2690, 2987)|2.08034032505|(0.893,0.812,0.635)|-1
PMDTGVTQTPRHLVMGMTDKKSLECEQNLGHNAMYWYKQSAKKAPELMFLCRLQKLTDNL
TVPSRFTPECRDSSHLYLHLDALQPEDSATYLCASSQ
>V111RF-ABDC01281094.1-trbv |(2622, 2919)|2.64833025132|(0.920,0.855,0.893)|-1
PLDTAVFQTPKYLLTQTGNDVSLKCEQTLGHNSMYWYKQDSTKLLKIMFSYNNQEKILNE
TASNRFSPESPDKAHLNLHINSPEPGDSAVYLCASSD
>V112RF-ABDC01281096.1-trbv |(2097, 2394)|2.70374052663|(0.904,0.953,0.863)|-1
PTDTGVTQTPRHLVMGMTDKKSLKCHQNLGHNAMYWYKLSAKKPPELMFYYYYQALRENM
TVPSRFSPECPDNSHLYLHLDALQPEDSATYLCASSQ
>V113RF-ABDC01281097.1-trbv |(3192, 3492)|2.94474003277|(0.984,0.976,0.985)|-1
HTEPGVIQTPSHQVTKKGQEVILRCDPISGHLYFYWYRQISGQKLEFLVSFYNDNISEKS
ELFTDQFSLKRPKGSYLALKIQSTELEDSAMYFCASSK
>V114RF-ABDC01281097.1-trbv |(8780, 9077)|2.65327617662|(0.889,0.905,0.863)|-1
PLDTAVFQTPKYLLTQMGNNVALKCGQTLGHDYMYWYKQDSTKLLKIMFTYNNQELMLNE
TASNRFSPESPDKAHLNLHINSPEPGDSAVYLCASSD
>V115RF-ABDC01345813.1-ighv |(1734, 2043)|2.97700028092|(1.000,0.991,0.987)|-1
VRCEVQLVESGGGLVQPGGSLRLSCAASGFTFSSYGMHWVRQAPGKGLEWVAVIRYDGSK
QYYADAVKGRFTISRDNSKNMLYLQMNSLKVEDTAMYYCAK
>V116RF-ABDC01345814.1-ighv |(4248, 4551)|2.77211387893|(0.983,0.862,0.984)|-1
VQCDVQLVESGGGLVQPGGSLRLSCAASGFTLSSYGMNWVRQAPGKGLEWVSYIYSSSTY
YADSVKGRFTTSRENSQNMLYLQMNSLRDEDTAMYYCAR
>V117RF-ABDC01345817.1-ighv |(603, 906)|2.95696000066|(0.987,0.986,0.984)|-1
VQCEVQLVQSGGGLVQPGGSLRLSCAASGFTFSSYGMNWVRQAPGKGLEWVSYIYSSSTY
YADSVKGRFTTSRENSQNMLYLQMNSLRDEDTAMYYCAR
>V118RF-ABDC01358932.1-igkv |(615, 919)|2.69115313144|(0.992,0.839,0.955)|-1
SSGDIVMTQTPLSLPVTLGEPASISCRSSQSLLHSDGNSYMCWYLQKPGQSLQPLIYRVS
NRFSGVPDRFSGSGSGTDFTLKISRVEAEDVGVYYCMQD
>V119RF-ABDC01368596.1-trbv |(1048, 1348)|2.23941652221|(0.860,0.849,0.668)|-1
HTDAGVIQTPRHEVTEMGQAVTLKCEPISGHDTLLWYKQTLVQGLELLTYFRSQSQIDDA
GMPKGRFSAEMPNASFSTLKIQPTELRDSAVYLCASSS
>V120RF-ABDC01368601.1-trbv |(2109, 2406)|2.95422423344|(0.991,0.978,0.986)|-1
SVTAGVTQTPRFQILKTGQNMTLMCTQDTNHDSMYWYRQDPGLGLRLIHYSVAAGTTARG
DIPEGYNVSRSSTETFSLTMESATPSQTSAYFCASSE
>V121RF-ABDC01368602.1-trbv |(3661, 3963)|1.65726865564|(0.795,0.561,0.617)|-1
AGVTQTPGHLIKARGQQVTLKCFPVSGHDQVSWYQQALGQGPQFLIQYYGGQELEKGNFP
ARFSGHQFRDYRSELNLSALELGDSALYLCASSFHSPAE
>V122RF-ABDC01381867.1-igkv |(294, 594)|1.74237468773|(0.618,0.569,0.573)|-1
TTGNTALIQFPEHLTASLGDSVSINCRAGQSISDYLSWYQQKPGQAPKLLIYDADNLYSG
VSSRFTGLQSGTEFILTITNVKADDAATYYCQQDYTVP
>V123RF-ABDC01396906.1-ighv |(901, 1210)|2.99596000066|(1.000,0.999,0.997)|-1
VQCEVQLVESGGGLVQPGGSLRLSCAASGFTFDYYGMNWVRQAPGKGLEWVSYISWNGGS
TYYADAVKGRFTISRDNSKNMLYLQMNSLRAQDTAVYYCAR
>V124RF-ABDC01406436.1-iglv |(5624, 5924)|1.89545393909|(0.630,0.958,0.661)|-1
SVASQLTQVPAVSVALGQTASITCQGDGIRSYYANWYQQKPGQAPVLLIYSDNNRPSGIP
ERSSGSNSGNMATLTMNRAQADDEGDYHCQSFDSRGTL
>V125RF-ABDC01418360.1-iglv |(1917, 2229)|2.65762867815|(0.926,0.861,0.892)|-1
SVAFQLTQVPAVSVALGQTASITCQGEGLSSYYVNWYQQKPGQAPVLIIYTDIFSNSNRP
SGIPERFSSSVSGDTATLTISGAQAQDEADYYCQVWVSENNK
>V126RF-ABDC01419594.1-ighv |(2167, 2474)|2.03256006445|(0.967,0.980,0.564)|-1
AHSQVQLVQSGAEVKPPGASVKVSCKASGYTFTSYYMHWVRQTPGQGLEWMGEINPNSGG
TSYAQKFQGRVTMTRDTSTSTAYMELSSLRPDDTAVYYCA
>V127RF-ABDC01425625.1-iglv |(109, 419)|2.89555901428|(0.999,0.998,0.922)|-1
SLANFVLTQPSSVSGSPGQKVTISCTRSSGNIGSYYVQWYQQRPGSAPSTVIYKHNKRPS
GVPDRFSGSIDSSSNSASLTISGLQSEDEADYYCQSYDGSY
>V128RF-ABDC01454736.1-trav |(1674, 1968)|2.97719216959|(0.986,0.997,0.995)|-1
RTHGNSVTQTEGQVTLSEKAFLHINCTYTSTGYPSLFWYVQYPGEGPQLLLKAATANDKG
MNKGFEATYKKETTSFHLEKASVHESDSAVYYCAMS
>V129RF-ABDC01455982.1-trbv |(239, 546)|2.84216172767|(0.987,0.985,0.900)|-1
HTDAGITQNPRHKITEIGKQVTLSCHQNDNHFYMYWYRQDLGHGLRLIYYSVDAQSTDKE
EVAEGYKVSRSNKEDFLLFLESATRSQTSVYFCASSEYTA
>V130RF-ABDC01465190.1-iglv |(381, 691)|2.98309640489|(1.000,0.985,0.999)|-1
SLANFVLTQPSSVSGSPGQKVTVSCTRSSGNIGSNYVYWYQQRPGSAPTTVIYRDDQRPS
GVPDRFSGSIDSSSNSASLTISGLQSEDEADYYCQSYDGSA
>V131RF-ABDC01471087.1-ighv |(643, 952)|2.99899600001|(1.000,1.000,0.999)|-1
VQCEVQLVESGGGLVQPGGSLRLSCAASGFTFSDYWMNWVRQAPGKGLEWVAHIRYDGSK
QYYADAVKGRFTISRDNSKNSLYLQMNSLRAEDTALYYCAR
>V132RF-ABDC01473376.1-trbv |(205, 505)|2.9395031224|(0.989,0.989,0.964)|-1
SYDAKVTQTPGHLIKEKGQKASMDCTPQQGHNSLYWYQQSQNKELEFLVYFENKELFDQT
EMHKKRFSSKCPPDSPCRLEILSSEPGDSALYFCASSP
>V133RF-ABDC01491936.1-trbv |(1492, 1794)|1.64740352734|(0.798,0.561,0.615)|-1
AGVTQTPRHLITARGQQVTLKCFPVSGHNQVSWYQQALGQGLQFLIQYFEGEEREKGNFP
ARFSGHQFSDYRSELNLSALELGDSALYLCASSFHSPAE
>V134RF-ABDC01493416.1-ighv |(429, 735)|2.99696400065|(1.000,0.997,1.000)|-1
VQCDVQLLESGGGLVQPGGSLRLSCAASGFTLSSYYMHWVRQAPGKGLEWVSTISSGGST
YYADAVKGRFTISRDNGKSSLYLQMNSLKAEDTAVYYCAR
>V135RF-ABDC01493570.1-iglv |(337, 641)|1.62060898255|(0.520,0.657,0.516)|-1
TSQEVVTQETSLLTTPGGTVTLTCGSSTGAVTTSNYANWVQQGSNEVPRGLIYGTSNRYP
GVPARFSGSLLGDKAALTITGAQAEDEAEYYCALWFSNH
>V136RF-ABDC01537099.1-igkv |(1719, 2017)|2.43164248363|(0.771,0.958,0.934)|-1
TRCDIQVTQSPSSVSASPGDTVTISCRASQDISNRLSWYQQKPGKPPKALIYVASNLHSG
VSSRFSGSGSGTDYSLTIRGLETDDAATYFCRQYKNN
>V137RF-ABDC01540867.1-iglv |(1970, 2280)|2.99799200002|(1.000,0.999,0.999)|-1
SLANFVLTQPSSVSGSPGQKVTISCTRSSGNIESSYVHWYQQRPGSAPTTVIYDDNERPS
GVPDRFSGSIDSSSNSASLTISGLQSEDEADYYCQSYDASA
>V138RF-ABDC01560090.1-trbv |(258, 558)|2.96894800078|(0.990,0.992,0.987)|-1
SMDTEVTQSPRYLVKGKEQKTKMDCVPKKGHSYVYWYQKKLEEGLKFLVYLQDEDIIEKE
EIINNRFSAQCPKNSPCILEIQSTESGDSALYFCASSQ
>V139RF-ABDC01562688.1-igkv |(1193, 1508)|2.93726255615|(0.996,0.955,0.993)|-1
SSGDIVMTQTPLSLPVTPGETASISCRASQSIQYSDGNTYLNWFLQKPGQPPKRLIYKVS
NRDSGVSDRFSGSGSGTDFTLTISRVEAEDVGVYYCMQASYYP
>V140RF-ABDC01582683.1-iglv |(809, 1119)|2.30504905901|(0.957,0.946,0.675)|-1
SLSQPVLTQPSSLSASPGASARLTCTLSSGSSVGSYWINWYQQKPGSPPRYLLSYYSDSY
KHQVSGVPSRFSGSKDASANAGILHVSGLQPEDEADYYCAV
>V141RF-ABDC01624510.1-iglv |(99, 409)|2.99799200002|(1.000,0.999,0.999)|-1
SLANFVLTQPSSVSGSPGQKVTISCTRSSGNIESSYVHWYQQRPGSAPTTVIYDDNERPS
GVPDRFSGSIDSSSNSASLTISGLQSEDEADYYCQSYDASA
>V142RF-ABDC01625120.1-trbv |(508, 808)|1.97146018329|(0.630,0.866,0.689)|-1
HAGAGVSQSPRHKVTERGQNVTLSCDPISGHISLYWYRQTPEKGLEFLIYFQREEEGDKS
GLRSDRFSAERPEGSVSTLKIRAAEQGDSTLYLCTSSL
>V143RF-ABDC01653181.1-trbv |(226, 528)|2.18132060986|(0.887,0.829,0.662)|-1
AGVTQTPGHLIRARGQQMTLKCFPVSGHNRVYWYQQTPGQGLQFLIEYYNGEQGQKENIS
PRFSGHQFSDYRSELNLSALELGDSALYLCASSFHSPAE
>V144RF-ABDC01655862.1-trbv |(462, 762)|1.87453461522|(0.626,0.991,0.684)|-1
HAGAGVSQSPRHKVAEKGQNVTLRCDPISGHDFLYWYRHTLGQGPQFLIYFQDKGVAEQS
KLIGERISAERPEGSFSTLKIRPAEQGDSAVYLCTSSL
>V0RF-JZKE01005121.1-trbv |(3942, 4254)|2.96278066996|(0.981,0.985,0.998)|1
LVETKVTQTPRHLVKRTGEKVLLKCSQDMDHERMFWYRQDPGLGLRLIYFSYDVDNDEKG
DVSEGYSASRKKKEYFPLVLESASTNQTSVYLCASRYPQRCT
>V1RF-JZKE01068552.1-trbv |(289, 585)|1.89139282982|(0.971,0.904,0.547)|1
SMNAGVTQTPRFQILETGQNMTLRCVQDMNHNNMYWYRQDPGLGLRLIHYSVGAGTTANG
EVPEGYSVSRSSTKNFPLTLGSATPSQTSVYFCASSD
>V2RF-JZKE01073331.1-trdv |(5473, 5772)|1.76341473101|(0.808,0.612,0.619)|1
SIVAQKVTQAQTARSTTVGQTVTLNCQYETSRIYYTINWYKQLPSKEMIFLLRQGSNSQN
AKDGRYSVNFRKEAKSIDLTISDLRLEDLAKYFCALCE
>V3RF-JZKE01214711.1-trav |(1444, 1730)|1.68972233588|(0.565,0.508,0.695)|1
RMMSITKKTGSYIIITCDIQQSTSQYIHWYLFQEGRTPQRILYYDLVSSKTVLESGFSLE
KYHAYASRGKSSRFILQNLEESDSGVYYCATWS
>V4RF-JZKE01218258.1-igkv |(171021, 171321)|2.99180001921|(1.000,0.999,0.993)|1
ARCDIQMTQSPSSLAASLGDTVTITCQASQGISNYLSWYQQKPGQSPKILIYGASNLETG
VPSRFSGSGSGTDFTLTISSLQPEDFATYYCLQSYNYP
>V5RF-JZKE01218259.1-igkv |(864, 1179)|2.58605741288|(0.991,0.779,0.981)|1
SSGEIVMTQTPLSLPVTLGEPASISCRSSQSLLHSNGNTYLSWYLQKPGQSPQLLIYLGF
TRASGVPDRFSGSGSGTDFTLKISKVEAEDVGVYYCMQTIQVP
>V6RF-JZKE01218259.1-igkv |(11427, 11740)|2.60959118825|(0.915,0.791,0.980)|1
SSGDIVMTQTPLSLSVTPGESASISCTASQNIQNTKGNTYLNWFLQKPGQPPKRLIYKIS
NRDSGVSDRFSGSGSGTDFTLEISRVEAEDVGVYYCMQASYY
>V7RF-JZKE01218269.1-igkv |(713, 1028)|2.26768044397|(0.986,0.656,0.979)|1
SSGEIVMTQTPLSLPVTPGEPASISCSSSQSLLHSNGNTYLYWYLQKPGQSPQLLIYRVS
NRLSGVPDRFSGSGSGTDFTLKISRVEAEDVGVYYCMQALQFP
>V8RF-JZKE01218271.1-igkv |(2296, 2608)|1.7149443604|(0.980,0.519,0.852)|1
ACGDIVMTQSPGSLAASPGERVTINCKSSQSLLYNNNNYLAWYQQKPGQAPKVLISWAST
RASGVPDRFSGSGSGTDFTLTISSLQAEDVAVYYCAQYYNYP
>V9RF-JZKE01244686.1-ighv |(3631, 3937)|2.997|(0.999,0.999,0.999)|1
VQCEVQLVESGGGLVQPGGSLTLSCVASGFTFSSYAMCWVRQAPGKGLEWVSAIGSGGGT
YYADAVKGQFTISRDNSKNTLSLQMKSLQAEDTAMYYCAR
>V10RF-JZKE01244690.1-ighv |(27, 336)|2.95823565456|(0.997,0.993,0.971)|1
VQCEVQLVESGGGLVQPGGSLRLSCAASGFTFDDYAMHWVRQAPGKGLDWVSVINWNGDY
INYADAVKGRFTISRDNSKNSLYLQMNSLRAEDTAVYYCAR
>V11RF-JZKE01244709.1-ighv |(12, 321)|2.99798400013|(1.000,1.000,0.998)|1
VQCEVQLVESGGGLVQPGGSLRLSCAVSGFTVSNYYMSWVRQAPGKGLEWVSYIYSDDGD
TNYADAVKGRFTTSTDNGKNMLYLQMNSLRTEDTAVYYCAR
>V12RF-JZKE01244710.1-ighv |(1079, 1388)|3.0|(1.000,1.000,1.000)|1
AQCEVQLVESGGGLVQPGGSLTLSCAASGFTFSDYYMSWVRQAPGKGLEWVSRISNTGGS
TWYADAVKGRFTISRDNSKNTLSLQMNSLRAEDTAVYYCAR
>V13RF-JZKE01244715.1-ighv |(308, 614)|2.99899600001|(1.000,0.999,1.000)|1
VRCEVQLVESGGGLVQPGGSLTLSCAASGFTFSSYAMHWVRQAPGKGLEWVSRINSGGST
SYADAVKGRFTISRDNSKNMLSLQMNSLRSEDTAVYYCTR
>V14RF-JZKE01247537.1-trbv |(10488, 10784)|1.59475083781|(0.892,0.741,0.503)|1
SVNAGITQTPRFQILETGQNMTLRCVQDMNHNNIYWYRQDPGLGLRLIHYSVGAGTTTNG
EVPEGYSVSRSSTKNFPLTLGSATPSQTSVYFCASSD
>V15RF-JZKE01249931.1-iglv |(10411, 10721)|2.2702434905|(0.904,0.925,0.658)|1
SLSQPVLTQPPSLSASPGASARLTCTLSSGTVVGGYHISWYQQKPGSRPRYLLRYHSDSN
KHQGSGIPSRFSGSKDASANAGILHISGLQPNDEADYYCLT
>V16RF-JZKE01249932.1-iglv |(5041, 5344)|2.2061254436|(0.710,0.751,0.763)|1
SLSQPVLTQPPSASASLGASAKLTCTLSSAHSGYTIAWYQQQPGKAPQYLMYVKSDGRHS
KGDGIPDHFSGSSSGADRYLTISNIQPEDEADYICGADY
>V17RF-JZKE01249932.1-iglv |(7450, 7753)|2.2061254436|(0.710,0.751,0.763)|1
SLSQPVLTQPPSASASLGASAKLTCTLSSAHSGYTIAWYQQQPGKAPQYLMYVKSDGRHS
KGDGIPDHFSGSSSGADRYLTISNIQPEDEADYICGADY
>V18RF-JZKE01249933.1-iglv |(3726, 4036)|2.79268002839|(0.998,0.949,0.896)|1
SLSQPVLTQPPSLSASPGASARLTCTLSSGFSVGSYAIYWYQQKPGSPPRYLLSYYSDSD
KHQGSGVPRRFSGSKDASANVGILHISGLQPEDEADYYCMV
>V19RF-JZKE01249942.1-igkv |(820, 1133)|1.83570737079|(0.588,0.613,0.655)|1
SLSQPVLTQPPSASASPGASAKLTCTLSSAHSSYTIAWHQQQPGKAPRYLMWVNSAGSHS
KGDGIPDRFSGSSSGADRYLTISNIQPEDEADYYCQTWDSGI
>V20RF-JZKE01249944.1-iglv |(1831, 2141)|2.98851611711|(1.000,0.989,1.000)|1
SLANVVLTQPSSVSGSPGQKVTISCTRSSGNIGDNYVHWYQQRPGSAPTTVIYADDKRPS
GVPDRFSGSIDSSSNSASLTISGLQSEDEADYYCQSYGSSA
>V21RF-JZKE01249954.1-iglv |(2355, 2642)|2.11595021711|(0.805,0.627,0.803)|1
PAVSVALGQTARISCQGDDHISNFVPTNWYQQKPGQAPVLVIYGNSNRPSGIPERFSGSK
SGTTATLTISGAQAGDEADYYCQSLDMSGNNHTV
>V22RF-JZKE01249955.1-iglv |(302, 610)|2.05480999448|(0.905,0.574,0.934)|1
SVASQLTQVPAASVALGQTARITCQEDGIRRFFTNWYQQKPGETPVLLIYDSSKQPSGIP
ERFSGSKSGTTATLTISGAQAGDEADYYCQSFDISSNYLTA
>V23RF-JZKE01249956.1-igkv |(39, 357)|2.44177052025|(0.876,0.841,0.772)|1
SPFLSSLAGSMASQLTQEPSVSVALGQTARMTCQGDSLRSYYASWYQQKPGQAPVLVIYS
NSNRPSGIPERFSGSKSGTTATLTISGAQAEDEADYYCGSYTGS
>V24RF-JZKE01249956.1-iglv |(5127, 5437)|2.56363522562|(0.816,0.992,0.900)|1
SGAQSALTQPSSVSGNPGQSVTISCAGTSSDVGKYNYVSWYQQHPGTAPKLLIYNVNTRT
SGIPDRFSGSKSGNTASLTISGLLAEDEADYHCSSYRSGNA
>V25RF-JZKE01249957.1-iglv |(3969, 4267)|2.96472550775|(1.000,0.987,0.980)|1
SVASQLTQVPAVSVALGQTARITCQGDSLSSYYPNWYQQKPGQAPVLVIYGNSNRPSGIP
ERFSSSDSGTTATLTISGAQAGDEADYYCGSYAGSDT
>V26RF-JZKE01249957.1-iglv |(9221, 9531)|2.5537557606|(0.813,0.995,0.899)|1
SGAQSALTQPSSVSGNPGQSVTISCAGTSSDIGKYNYVSWYQQHPGTAPKLLIYNVNTRA
SGIPDRFSGSKSGNTASLTISGLLAEDEADYHCSSYRSGNA
>V27RF-JZKE01249957.1-igkv |(15254, 15557)|2.0436110911|(0.715,0.756,0.617)|1
FVASDELTQPHSVSVSPGQTAKITCSGDSLAKKYASWLQQKPGQSPVLVIYKDSERPSGI
PERFSGSSSGTTVTLTITGAQVEDEADYYCQSRDSSGTH
>V28RF-JZKE01249958.1-iglv |(6051, 6351)|2.36862908524|(0.913,0.693,0.942)|1
SVASQLTQVPAASVALGQTARITCQEDGIRSFFTNWYQQKPGEAPVLLIYDSSKQPSGIP
ERFSGSKSGTTATLTISGAQAGDEADYYCQSFDISSNY
>V29RF-JZKE01249959.1-iglv |(447, 745)|2.92186884012|(0.992,0.950,0.987)|1
SVASYELTQPPSVSVSPGQTARITCGGNNIGNKYAYWHQQKAGQAPVLIIYSDSNRPSGI
PERFSGSNSGNTATLTISGTQAGDEADYYCQVWDGSN
>V30RF-JZKE01255160.1-ighv |(7108, 7423)|2.994900005|(1.000,1.000,0.995)|1
VQCEVQLVESGGGLVQPGGSLTLSCAASGFSFSNYWMHWVRQAPGKGLEWVSSIGNDGST
SYADAVKGRFTISRDNDKNTLSLRMNSLRAEDTAVYYCARETV
>V31RF-JZKE01296733.1-igkv |(5866, 6179)|2.96821230726|(0.994,0.995,0.980)|1
SSGDIVMTQTPLSLSVTPGESASISCTASQSILHTDGNTYLNWLLQKPGQPPKRLIYKIS
NRDSGVSDRFSGSGSGTDFTLEISRVEAEDVGVYYCMQASYY
>V32RF-JZKE01097728.1-igkv |(2698, 3010)|2.95338267424|(0.997,0.963,0.998)|-1
ACGDIVMTQSLRSLAVSPGERVTIDCKSSQSLLSNNKNYLAWHQQKPGQAPKLLIYWAST
RASGVPDRFSGSGSGTDFTLTISSVQAEDVAVYYCQQYHSTP
>V33RF-JZKE01143868.1-trav |(15192, 15493)|2.94692000218|(0.983,0.985,0.979)|-1
SSVAQTVTQSQPEMSVQEAGTVTLDCTYATSDSNYYLFWYKQPPSRQMILIIRQEAYKQQ
NATENRFSVNFQKAAKSFSLEISDSQLEDAAMYFCAFM
>V34RF-JZKE01143869.1-trav |(6274, 6564)|2.97775601537|(0.989,0.994,0.995)|-1
VSSEDKVIQSPSSLAVHEGDSATLTCNYEVSYFQSLQWYKQEKNAPTFLFTLTSSGIEKK
SGRLSSILDNKELLSTLNITATQTRDSAIYFCAVE
>V35RF-JZKE01143870.1-trav |(3358, 3666)|1.64532649372|(0.548,0.513,0.774)|-1
VNSQQKDNDQEVKQNSPSLSVQEGGISVLNCDYTNNMFDYFLWFKQYPAKGPALLISTSS
VVDKKVDGRFTVFSNRSAKHLSLHIAASQPGDSALYLCAAS
>V36RF-JZKE01143870.1-trav |(12640, 12943)|1.90513486779|(0.608,0.857,0.809)|-1
SSMSQQVIQSQSAISKQEGETVKLECSYNTSVPYHILYWYKRPPSGEIIFLIFQHTDTDT
NATQGQYSVSFQKAAKTIRLIISPSQLEDSATYFCCLRE
>V37RF-JZKE01143870.1-trav |(25555, 25844)|1.51413201213|(0.514,0.788,0.477)|-1
IMGDAKTTQPNSMESTEEEPVYLPCNHSTISGSEYVYWYRQILLQGPEYVIHGLKSNVTN
SMATLAISADRKSSTLILPRVTLGDTAVYYCIVR
>V38RF-JZKE01143870.1-trdv |(43747, 44046)|1.76341473101|(0.808,0.612,0.619)|-1
SIVAQKVTQAQTARSTTVGQTVTLNCQYETSRIYYTINWYKQLPSKEMIFLLRQGSNSQN
AKDGRYSVNFRKEAKSIDLTISDLRLEDLAKYFCALCE
>V39RF-JZKE01143871.1-trav |(16684, 16984)|2.08260227718|(0.845,0.764,0.646)|-1
RTGAQSVAQPDVHVTVSEGDPLKLRCTYSGGVVTSYLFWYIRYPGQSLQFLLKYTSGDTL
VKGMKGFEAELRKNESSFHLKKHSARLSDSAQYFCAVS
>V40RF-JZKE01143872.1-trdv |(10578, 10878)|1.82015118041|(0.806,0.518,0.781)|-1
STVAQKVTQAQTARSMTVGRTVSLNCRYETSWNYYYIFWYKQLPSKEMIFLLYQYSGNQN
AKDGRYSVNFRKEVKSIDLTISALRLEDSAKYYCALAE
>V41RF-JZKE01143872.1-trav |(21701, 22001)|2.0933080853|(0.856,0.649,0.773)|-1
LNGQEVKQIPQFLHIQEGEDFSTYCNSTSTLNTVQWYKQRPGGSPVLLMILVKSGEVKKE
KRLTAQFGETRKDSSLHITAAQTADVGTYFCAVAQCSP
>V42RF-JZKE01143873.1-trdv |(6157, 6456)|2.95063465422|(0.975,0.999,0.979)|-1
STVAQKVTQYQATTSMTEGQAVTLNCQYETSSTTYFICWYKQLPSKEMIFLLRQGSTSQN
AKDGRYSVNFRKEAKSINLTISALRLEDSAKYFCALWD
>V43RF-JZKE01143873.1-trdv |(14264, 14561)|2.02595000814|(0.712,0.604,0.768)|-1
SVAQKVTQSQSARSTTEGRAVTLNCRYETSWSYYYIFWYKQLPSKEMIFLLRQDSDGGNA
NNGRYSVSFRKEVKSIDLTISALRLEDSAKYYCALAE
>V44RF-JZKE01143874.1-trdv |(2471, 2770)|2.93540816598|(0.982,0.984,0.970)|-1
STVAQKVTQAQTATTRTVGQAVTLNCQYEASWSSYYIYWYKQLPSNEMIFLLRQYSGDQN
AKNGRYSINFQKEAKSIDLTISALRLEDSAKYFCALWD
>V45RF-JZKE01143889.1-trdv |(1124, 1427)|1.74424942129|(0.763,0.651,0.548)|-1
SSISQKVTQAHAAISMLERKAVTLDCVYEAIAFSYYLFWYKQPPNGEMILLIDQESFNEQ
NATKGRYCLNFQKSAGSISLTITALRLGDSAMYFCALRE
>V46RF-JZKE01143890.1-trav |(1103, 1400)|2.99199600001|(0.997,0.998,0.997)|-1
RSNGDSVTQTEGTVTLPEGAPVILNCTYETTYSVSYLFWYVQYLNQSPQLLLKSSTENQR
GENRGFQANLVKSDKSFHLEKSSLRMSDSAVYYCALS
>V47RF-JZKE01143891.1-trav |(1676, 1998)|2.80526848764|(0.933,0.975,0.907)|-1
TNGDSVTQTEGPVTLPEGEALTLNCTYQSSYAAFLFWYVQFQNKEPVLLLKSSSETQEMD
SRGFQANNVKSDSSFHLKKPSVQLSDSAVYYCAMRDTARGTAGGA
>V48RF-JZKE01143891.1-trav |(8677, 8980)|2.98202424585|(0.987,0.997,0.999)|-1
PSMAQKVTQAQPEISVVEKESVTLDCVYETRDPTYYLFWYKQPPSGEMIFLIRQDSFNEK
NETKDRYFLNLQKSTSSISLTITASQLMDSAVYFCALRE
>V49RF-JZKE01143893.1-trav |(6613, 6900)|2.95098000014|(0.984,0.985,0.982)|-1
VNSQQGEENPQALSIQEGENATINCSYKSSISNLQWYRQDSGRGLTLLILIRANKREEHH
GRLTVTLNTSIKSSSLIITASCAADSATYFCATD
>V50RF-JZKE01143895.1-trav |(12286, 12579)|2.88979292281|(0.981,0.924,0.999)|-1
VSGGENVGLHPPTLNVQEGDTSVINCTYSNSASNYFPWYKQELGKGPQFIIDIRSNMDNK
QEQRFTVLLNKTAKHLSLHIAGTQAGDSAVYFCAES
>V51RF-JZKE01143895.1-trav |(15624, 15933)|2.99799600001|(0.999,1.000,0.999)|-1
AGIAQKVTQSQPAMSVQEKEAVTLDCTYDTSTSVTSYTLFWYKQPSSGEMILLIRQDSYN
QQNATEGRYSLNFQKASKSIKLVISASQVGDSAIYFCALSE
>V52RF-JZKE01143895.1-trav |(22481, 22772)|2.991|(0.997,0.997,0.997)|-1
VRSQQKEVEQTPESLSVSEGATASLNCTYSNTASQYFTWYRQYSGKGPELLVSIYSNGDK
EEERFTVHLNMASRYVSLLIRDSQPSDSATYLCAV
>V53RF-JZKE01143895.1-trav |(26982, 27279)|1.93891668422|(0.853,0.607,0.742)|-1
GTGAQTVTQPDLHVTVTEGASLELRCNYSVSFTPSLWWYVQYPNQGLQLLLKYVSGSTLV
KGIQGFEAEFRKNESSFHLRKTFAHLSDSAQYFCAVS
>V54RF-JZKE01143896.1-trav |(1244, 1537)|2.96845211916|(0.992,0.981,0.996)|-1
VRGGENMGLHPPNLSVQEGDTSVINCTYSNSNSDYFCWYKQEPGKGPQFIMDIRSNKDKK
QEGRFTILLNKMAKHLSLHIAGTQAGDSAAYLCAES
>V55RF-JZKE01143896.1-trav |(8327, 8630)|2.98767605248|(0.999,0.990,0.999)|-1
SGIAQKVTQVQPAMLVQEKEAVTLDCTYDTSDSRYTLFWYKQPSSGEMLLLIRQDSYNQQ
NATEGRYSLNFQKANKSIKLVISASQVGDSAIYFCALME
>V56RF-JZKE01143896.1-trav |(15626, 15938)|2.96428365264|(0.997,0.999,0.971)|-1
VRSQQKEVEQTPESLSVSEGATASLNCTYSNTASQYFAWYRQYSGKGPELPVSIYSTGDK
EEEGRFTVQLNKGSRYVSLLIRDSQPSDSATYLCAVSTQCSP
>V57RF-JZKE01143902.1-trav |(453, 744)|2.98996800026|(0.998,0.996,0.996)|-1
VRSQQKEVEQTPESLSVSEGATASLNCTYSNTASQYFAWYRQYSGKGPELLVFIYSTGDK
EEGRFTVQLNKASRYVSLLIRDSQPSDSATYLCAV
>V58RF-JZKE01143903.1-trav |(641, 935)|2.9909280013|(0.995,0.998,0.998)|-1
RTHGDSVTQMEGQVTLSEEAFLTINCTYTATGYPALFWYVQYPGEGPQLLLKATKANDKG
INKGFEATYKRETTSFHLEKASVHESDSAVYYCALS
>V59RF-JZKE01143910.1-trav |(6899, 7192)|2.93374224752|(0.973,0.967,0.996)|-1
VSGKNQVEQGPQSLIIPEGENCTLQCNYTVSPFNNLRWYKQETGRGPVSLIIMNYSKSKE
SNGRYTATLDASAKQSSLHITASQLSDSASYICVAS
>V60RF-JZKE01143910.1-trav |(27248, 27545)|1.80278270328|(0.668,0.511,0.736)|-1
GTGAQTVTQPDLHVTVTQGAFLELRCNYSVSFTPFLWWYVQYPNQGLQLLLKYVSGNTLV
KGIQGFEAEFRKNESSFHLRKTFAHLSDSAQYFCAVS
>V61RF-JZKE01143910.1-trav |(50038, 50331)|2.7269732542|(0.988,0.833,0.998)|-1
VSGGENVGLHPPTLNVQEGDTSVINCTYSDSASIYFPWYKQELGKGPQFITDIRSNMDNK
QEQRFTVLLNKTAKHLSLHIAGTQAGDSAVYFCAES
>V62RF-JZKE01143910.1-trav |(57835, 58138)|2.99174403277|(1.000,0.992,1.000)|-1
AGVAQKVTQSQPAMLVQEKEAVTLDCTYDTSDSSYGLFWYKQPSSGEMLLLIRQDSYNQQ
NATEGRYSLNFQKARKSIHLVISALQLGDSAIYFCALSE
>V63RF-JZKE01143913.1-trav |(1691, 1985)|2.5984018452|(0.842,0.851,0.994)|-1
RTYGNTVTQGEGQVTLSEGAFLTINCTYTSTGYPTLFWYVQYPGEGPQLFLKATQANDKA
INKGFEATYKRETTSFHLEKASVHESDSAMYYCVLS
>V64RF-JZKE01143915.1-trav |(5771, 6058)|1.92088220753|(0.700,0.560,0.936)|-1
EVRGLQVQQSPSVLSLQEGTSPTLRCNFSATVYNMQWFRQNPGGGLISLFFMTSGTKQNG
RLNSTMNSKELYSTLHITASQLEDSGTYLCAVQE
>V65RF-JZKE01143915.1-trav |(12659, 12952)|2.95882119202|(0.976,0.993,0.992)|-1
VSRGENVEQRPSTLHVQEGDTSVINCTYSDSASSYFPWYKQELGKGPQLFIDIRSNLDKK
QDQRITLLLNRMTKHLSLHIAATQPGDSAVYFCVAS
>V66RF-JZKE01143915.1-trdv |(19560, 19869)|2.37544392829|(0.846,0.790,0.773)|-1
SSITQKVTQDQPAMLVQEKEAVTLDCTYDTSTSVNNFALFWYKQPSSGEMLLLIRQDSYN
QQNATEGRYSLNFQKAKKSIHLLISASQLEDSAMYFCALKK
>V67RF-JZKE01143916.1-trav |(6285, 6609)|1.51207224085|(0.541,0.581,0.438)|-1
AQSKDQVFQLPMVASSEGAVVEISCNHSVSNAYNFFWYLQFPGCAPRLLVKGSKPSQQGR
YNMTYERFSSSLLILQVQEADAAVYYCAVEDTEAGNPSRAEQKQRE
>V68RF-JZKE01143916.1-trav |(14368, 14665)|2.15756281553|(0.945,0.807,0.697)|-1
GLRAQSVTQPEDQVTVSEGNPLTVKCTYSYSGSPYLFWYVQYPNEGLQFLLKYIRGDNLV
KGSHGFEAEFNKSQTSFHLKKASACGSDSALYFCAVS
>V69RF-JZKE01143916.1-trav |(31693, 32009)|2.18505776276|(0.758,0.917,0.651)|-1
QSVTQPDGHITVSEGDPLELRCNYSSSVPPSLFWYVQYPNQGLQLLLKYTSGNSLVTGIK
SFKAEFNRSETSFQLKKASAHLSDSAQYFCAVSDTVPGAAGGA
>V70RF-JZKE01143916.1-trav |(38882, 39172)|2.96697252412|(0.995,0.979,0.994)|-1
ISRGEKVEQSPFLSVQEGDSSVINCTYTESTSTYFYWYKQGPGEGPQLLMTILSSMDKKQ
EQRLSVLLNKREKHLSLHISDTQPGDSAVYFCAVS
>V71RF-JZKE01143916.1-trav |(40477, 40765)|2.94994028297|(0.976,0.987,0.988)|-1
VNSQKIEQNPRALNIHEGETAAVTCNYTSYSPAFLQWYRQDPERGLVFLLLIRENEGEKQ
EGRLKVTFDTTHKQSSFYITDSQPADSATYLCAA
>V72RF-JZKE01143916.1-trav |(59581, 59872)|2.98770402421|(0.992,0.997,0.999)|-1
SHGDSVTQTDGQMLLTEGDSLIVNCSYETRQYPALFWYVQYPGEGLQLLLKAAKANDKGI
NKGFEATYNRETTSFHLEKASVHVSDSAVYYCALS
>V73RF-JZKE01143916.1-trav |(65263, 65563)|1.86621338782|(0.876,0.748,0.588)|-1
DARAQSVTQPDLSITVSEGASLELRCNYSYRGGNVYLFWYVQYPGQGLQLLLRYYSGNTL
VQGMKGFEAEVRKNEFSFTLRKPSVHWSDAAEYFCALS
>V74RF-JZKE01196378.1-trbv |(847, 1154)|2.95296034001|(0.992,0.984,0.978)|-1
HTDAGITQNPRFRVTETGKQVTLRCHQTDKYDYMYWYRQDLGRGLRLIHYSYGVQRTDKG
EFSEGYNVSRSDMEDFPLTLESATPSQTSVYFCAISDSTA
>V75RF-JZKE01235368.1-ighv |(1130, 1439)|3.0|(1.000,1.000,1.000)|-1
VQCQVQLVESGGGLVQPGGSLTLSCAASGFTFSSYWMYWVRQAPGKGLEWVSSINYGGGS
TYYADGVKGRFTISRDNSKNTLSLQMNSLRAEDTAVYYCAK
>V76RF-JZKE01238797.1-iglv |(185, 497)|2.99289600501|(0.999,1.000,0.994)|-1
SWAQSALTQPPSVSGAPGQTVTISCTGSSSNIGGGYYASWYQQLPGSAPKLLIYYDSDRP
SGIPARFSGSKSGSSASLTITGLQAEDEADYYCAAWDTSLSG
>V77RF-JZKE01238797.1-iglv |(4422, 4732)|3.0|(1.000,1.000,1.000)|-1
SLANFVLTQPSSVSGSPGQKVTISCTRSSGNIGDNYVSWYQQRPGSAPTTVIYDDNQRPS
GVPDRFSGSIDSSSNSASLTISGLQSEDEADYYCQSYDSSA
>V78RF-JZKE01238799.1-iglv |(2255, 2565)|2.99899600001|(1.000,1.000,0.999)|-1
SLANFVLTQPSSVSGSPGQKVTISCTRSSGNIGSYYVHWYQQRPGSAPTTVIYNDNQRPS
GVPDRFSGSIDSSSNSASLTISGLQSEDEADYYCQSYDSSA
>V79RF-JZKE01238800.1-iglv |(606, 916)|2.89227037078|(1.000,0.949,0.960)|-1
SLSQPVLTQPPSLSASPGASARLTCTLSSGFSVGSYAIYWYQQKPGSPPRYLLSYYSDSS
KHQGSGVPSRFSGSKDASANAGILHISGLQPEDEADYYCMA
>V80RF-JZKE01238817.1-iglv |(491, 803)|2.09704157414|(0.695,0.716,0.688)|-1
RWAEVVFTQPHSVSGSPGQKVIISCTRSSGNVGDNYVSWYQQRPGSAPTAVIYDDDQRPS
GVPDRFSGSIDSSSNSASLIISGLQPDDDADYHCLSGYDNYY
>V81RF-JZKE01255181.1-ighv |(445, 754)|3.0|(1.000,1.000,1.000)|-1
VQCEVQLVESGGGLVQPGGSLTLSCAASGFTFSDYYMHWVRQAPGKGLEWVSYISSSGGS
TYYADAVKGRFTISRDNSKNTLSLQMNSLRAEDTAVYYCVR
>V82RF-JZKE01255182.1-ighv |(1026, 1335)|2.99899600001|(1.000,0.999,1.000)|-1
VQCEVQLVESGGGLVQPGGSLTFSCAASGFTFSSYNMHWVRQAPGKGLEWVSYISNTGGS
TYYAEAVKGRFTISRDNSKNTLSLQMNSLRAEDTAVYYCAG
>V83RF-JZKE01278248.1-ighv |(4833, 5139)|2.99593600205|(1.000,0.996,1.000)|-1
VQCEVQLVESGGGLIQPGGSLTLSCAASGFTISSYYMDWVRQASGKGLEWVSAISSGGST
YYADAVKGRFTISRDNSKNTLSLQMNSLRAEDTAVYYCAR
>V84RF-JZKE01278249.1-ighv |(3382, 3691)|2.65034577942|(0.933,0.808,0.978)|-1
IQCEVHLVESGGGLVQPGASLKLSCAASGFSFSSYGMNWVRQAPGKGLEWVSHIDYDAGS
TYYADAVKGRFTISRDNSKNTLSLQMNSLRAEDTAMYYCAR
>V85RF-JZKE01278253.1-ighv |(3391, 3700)|2.9771523093|(0.996,1.000,0.982)|-1
VQCEVQLVESGGGLVQPGGSLRLSCAASGFTFSDYYMHWVRQAPGKGLEWVSYIYSDGGD
TNHADAVKGRFTTSTDNGKNMLYLQMNSLRAEDTAVYYCAR
>V86RF-JZKE01278255.1-ighv |(2535, 2844)|3.0|(1.000,1.000,1.000)|-1
VQCEVQLVESGGGLVQPGGSLTLSCAASGFTFSSYWMYWVRQAPGKGLEWVSSINSGGGS
TYYADAVKGRFTISRDNSKNTLSLQMNSLRAEDTAVYYCAK
>V87RF-JZKE01278267.1-ighv |(5092, 5401)|2.99798400013|(1.000,1.000,0.998)|-1
VQCEVQLVESGGGLVQPGGSLRLSCAASGFTFSSYGMNWARQAPGKGLEWVSTINYDGSS
TSYADAVKGRFTISRDNSKNTIYLQMNSLRAEDTAVYYCAK
>V88RF-JZKE01278268.1-ighv |(3308, 3617)|3.0|(1.000,1.000,1.000)|-1
VQCEVQLVESGGGLVQPGGSLTLSCVASGFTFSSYYMHWVRQAPGKGLEWVSYINTAGGS
TSYADAVKGRFTISRDNSKNTLSLQMNSLRAEDTAVYYCAR
>V89RF-JZKE01278271.1-ighv |(48, 354)|3.0|(1.000,1.000,1.000)|-1
VQCEVQLVESGGGLAQPGGSLTLSCAASGFTFSNYGMHWVRQAPGKGLEWVSAISSGGST
YYADAVKGRFTISRDNSKNTLSLQMNSLRTEDTAVYYCAK
>V90RF-JZKE01278271.1-ighv |(7402, 7711)|2.99899600001|(1.000,1.000,0.999)|-1
VQCEVQLVESGGGLVQPGGSLTLSCAASGFTFSSYDMSWVRQAPGKGLEWVAVIWADGSK
QYYADSVKGRFTISRDNGKNMLYLQMNSLRAEDTAMYYCAS
>V91RF-JZKE01278273.1-ighv |(24, 333)|2.994900005|(1.000,0.995,1.000)|-1
VQCEVQLVESGGGLVQPGGSLTLSCAASGFTFSSYVMYWFRQAPGKGLEWVSRISSSGGS
TSYADALKGRFTISRDNSKNTLSLQMNSLRAEDTAVYYCAK
>V92RF-JZKE01278276.1-ighv |(456, 765)|3.0|(1.000,1.000,1.000)|-1
VQCEVQLVESGGGLVQPGGSLKLSCAASGFTFSSYGMNWVRQAPGKGLEWISHINYDAGS
TYYADAVKGRFTISRDNSKNTLSLQMNSLKAEDTAVYYCAK
>V93RF-JZKE01278277.1-ighv |(1432, 1741)|2.99593600205|(1.000,0.996,1.000)|-1
VQCEVQLVESGGGLVQPGGSLTLSCAVSGFTVSSYGMNWVRQAPGKGLEWVSYIYSDGGS
TNYADAVKGRFTTSTDKSKNTLSLQMNSLRAEDTAVYYCAR
>V94RF-JZKE01278602.1-ighv |(13, 322)|3.0|(1.000,1.000,1.000)|-1
VQCEVQLVESGGGLVQPGGSLTLSCAASGFTFSSYWMSWVRQAPGKGLEWVSTISHTGGS
TYYADALKGRFTISRDNSKNTLSLQMNSLRTEDTAVYYCAR
>V95RF-JZKE01278602.1-ighv |(4600, 4909)|2.99089600501|(0.999,0.994,0.998)|-1
VQCEVQLVESGGGLVQPGGSLRLSCVASGFTFSSYVMYWFRQSPGKGLEWVSRISSSGGS
TSYADALKGRITISRDNSKNTLSLQMNSLRAEDTAVYYCAI
>V96RF-JZKE01278605.1-ighv |(401, 710)|3.0|(1.000,1.000,1.000)|-1
VQCEVQLVESGGGLVQPGGSLTLSCAASGFTFSDYYMSWVRQAPGKGLEWVSRISSDGTS
TYYADAVKGRFTISRDNSKNTLSLQMNSLQAEDTAVYYCAR
>V97RF-JZKE01278607.1-ighv |(3705, 4014)|2.99899200002|(0.999,1.000,1.000)|-1
VQCEVQLVESGGGLVQPGGSLTLSCAASGFSFSSYWMHWVRQAPGKGLEWVSYINSAGGS
TYYADAVKGRFTISRDNSKNTLSLQMNSLRAEDTAVYYCAR
>V98RF-JZKE01278609.1-ighv |(657, 966)|3.0|(1.000,1.000,1.000)|-1
VQCEVQLVESGGGLIQPGGSLTLSCAASGFSFSSYRMNWVRQAPGKGLEWISYISSGGGS
TYYADAVKGRFTISRDNSKNTLSLQMNSLRAEDTAVYYCAR
>V99RF-JZKE01278610.1-ighv |(3774, 4083)|3.0|(1.000,1.000,1.000)|-1
VQCEVQLVESGGGLVQPGGSLTLSCAASGFSFSSYDMSWVRQAPGKGLEWVSYINYGGGS
TSYADAVKGRFTISRDNSKNTLSLQMNSLRADDTAVYYCAS
>V100RF-JZKE01278610.1-ighv |(12525, 12834)|2.991900005|(0.999,0.994,0.999)|-1
VHCEVQLVESGGGLVQPGGSLTLSCAASGFTVSSYCMSWVRQAPGKGLEWVSYIYSDGGS
RNYADAVKGRFTTSTDNGKNTLYLQMNSLRAEDTALYYCAR
>V101RF-JZKE01278611.1-ighv |(583, 892)|2.99696400065|(1.000,1.000,0.997)|-1
VQCEVQLVESGGGLVQPGGSLRLSCVASGFTFSDYYMSWVRQAPGKGLEWVLYIYSDDGD
TSYADAVKGRFTISTDNGKNMLYLQMNSLRAEDTAVYYCAR
>V102RF-JZKE01278611.1-ighv |(6883, 7192)|2.99899600001|(1.000,0.999,1.000)|-1
VQCEVQLVESGGGLVQPGGSLKLSCAASGFTFSSYGMNWVRQTPGKGLEWISYINSAGGS
TSYADAVKGRFTISRDNSKNTLSLQMNSLRAEDTAVYYCAR
>V103RF-JZKE01278614.1-ighv |(2171, 2477)|3.0|(1.000,1.000,1.000)|-1
VQCEVQLVESGGGLVQPGGSLTLSCAVSGFTVSSYDMSWIRQASGKGLEWVSYISYGGST
YYADAVKGRFTISRDNGKNTLSLQMNSLRTEDTAVYYCAR
>V104RF-JZKE01294660.1-trbv |(1696, 1993)|2.51937680314|(0.799,0.925,0.981)|-1
PVEAQVTQTPRNRITETGKNVTVTCSQNMNHEYMSWYRQDPGLGLKLIYYSAKVEFVTKG
DAPDGYTASRREKPSFSLNVESTRTSQTALYLCASSL
>V105RF-JZKE01294664.1-trbv |(5111, 5409)|1.62823610869|(0.832,0.549,0.648)|-1
SMDAGVTQTPRNRIAKTGQSILLECSQTEAHDRMYWYRQDPGLGLWLIYYSLGVNSTNEG
EVSKGYSVSRKEHAKFSLSLETAVPNQTALYFCASSH
>V106RF-JZKE01294668.1-trbv |(161, 463)|2.97567605248|(0.995,0.995,0.986)|-1
HTDAGITQNPRFRVTETGKQVTLRCHQTDKHDYMYWYRQDLGHGLRLIHYSIGAGNTEKG
QFSDGYSVSRSNEQNFSLTLESATPSQTSVYFCASSDST
>V107RF-JZKE01294668.1-trbv |(25796, 26084)|2.42885152436|(0.767,0.885,0.916)|-1
AMVMQNPRYQVTRVGKTVTLSCSQNMNHNTMYWYQQKLSQAPKLLFYYYEREFNNETDTS
DNFQPSRPDTSSSSLDIRSPGLGDSAMYLCATSR
>V108RF-JZKE01294668.1-trbv |(32591, 32891)|2.24363196736|(0.804,0.790,0.696)|-1
SSGEEVTQTPGHLLKGKGQKVKMYCVPIKGHRYVFWYQQILGKEFKFLFSFQDKEIFEET
EMLKQRFSAECPQNLPCSLEIQTAELQDSAVYLCASSE
>V109RF-JZKE01294668.1-trbv |(34381, 34677)|2.41514056171|(0.838,0.918,0.730)|-1
PAVSQTPSYQVTQMGQGVILRCDPISGHIFLYWYQQNHRQEMKFLLSFHYQNIAAESAMP
KERFSAERPNGTYSTLKIRPAEPGDSAVYLCASGSDT
>V110RF-JZKE01294669.1-trbv |(2779, 3079)|2.58042323844|(0.820,0.949,0.903)|-1
HMGAGVSQSPRHKITMRGQNVTLRCDPISGYTFLFWYQQTLGQGPQLLIYFQDKDVVDKS
KLTGDRISAERPEGSFSRLKIQPAEQGDSAVYLCASSL
>V111RF-JZKE01294669.1-trbv |(11432, 11727)|1.88007032103|(0.868,0.798,0.556)|-1
PTEAGVTQTPRHLIKARGQQVTLRCSPVSGHNRVYWYQQALGQGLQFLIQYYNGEEGEKG
NFPARFSGHQFSDYRSELNMSALELGDSALYLCASN
>V112RF-JZKE01294669.1-trbv |(21670, 21960)|2.93696800026|(0.979,0.977,0.981)|-1
DAGVIQSPRHLIKGKQETTILKCYPLSGHDTVYWYQQAPGQGLQFLISYYEKMQREKGNI
PQRFSGQQFADYHSELNLSSLEPGDSALYLCASSL
>V113RF-JZKE01294672.1-trbv |(4950, 5250)|2.46787897521|(0.807,0.816,0.854)|-1
HTGAGVSQSPRHKVTERGQNVSLRCDPISGHVSLFWYRQTPGQGLQLLIYFQGADATDKS
GLPSDRISAERPEGSFSTLKIQPAEQGDSAVYLCASSL
>V114RF-JZKE01294688.1-trbv |(5277, 5597)|1.88513349538|(0.663,0.763,0.549)|-1
EAGVTQTPRHLIKARGQQVTLRCSPVSGHASVYWYQQALGQGPQFLIQYYDGEEGEKGNF
PARFSGHQFSDYRSELNMSALELGDSALYLCDSSFHSPAEPPAVC
>V115RF-JZKE01294690.1-trbv |(9942, 10239)|2.93587652911|(0.972,0.988,0.977)|-1
PLDTAVFQTPKYLVSQMGNNVSLKCKQTLGHNTMYWYKQDSEKLLKIMFAYNNKELILNE
TVSNRFSPASPDKAHLNLHIESPEPDDSAVYLCASSY
>V116RF-JZKE01294692.1-trbv |(174, 471)|2.97880001921|(0.991,0.998,0.990)|-1
PVDTGITQTPRHLVMGMTDKKSLKCEQNLGHDAMYWYKQSAKKPPELMFYYNYQELRENL
TVSSRFSPECPDSSHLYLHLDALQPDDSAMYLCASSQ
>V117RF-JZKE01294699.1-trbv |(3116, 3413)|2.52564005313|(0.838,0.841,0.847)|-1
PMDTAVFQTPKYLLTETGNNVSLKCEQTLGNDAMYWYKQDSEKLLKIMFTYNNKELILNE
TVSNRFSPGSPDKAHLNLHIESPEAGDSAVYLCASSY
>V118RF-JZKE01294700.1-trbv |(9965, 10265)|2.36726948684|(0.795,0.730,0.915)|-1
HTEPGVIQTPTYQVIEKGQEVILRCDPISGHLYFYWYQQIWGQKVEFLVSFYNDNISEKS
KIFKDRFSLERPRGSYLALKIQSTEPEDSATYLCASSP
>V0RF-JYKQ01003190.1-trgv |(993, 1303)|1.60519709581|(0.875,0.608,0.612)|1
SQKSSNLEGKTKSITGPTGSPAEITCDLPGVSTLYIHWYLHQEGKAPQRLLYYEPYYFTV
VLESGISPGKYDTASTRKSWNLRLQNLIENDSGIYYCATWD
>V1RF-JYKQ01003191.1-trgv |(1259, 1575)|2.97481638724|(1.000,0.990,0.986)|1
SQKSSNLEGRTKSVTRPTGSSAEITCDLPEVSSFYIHWYLHQEGKAPQRLLYYDSSNSRV
VLESGISSGKYDSYGSTRRRNLRLRLQNLIENDSGVYYCANWD
>V2RF-JYKQ01003191.1-trgv |(5603, 5916)|2.98553608204|(1.000,0.996,0.990)|1
GQKSSNLEGITKSVTRPTGSSAEITCDFSGDSNFYIHWYLHQEGKVPQRLLYYDVSNSRD
VLESGLSPGKYYTHTRTRWSWILILRNLIENDSGVYYCANWD
>V3RF-JYKQ01005758.1-ighv |(2900, 3215)|2.96554104219|(0.996,0.977,0.994)|1
VKCEAQLMESGGGLVQPGGSLRLSCAASGFTFSSYGMSWVHQTPGKGLEWVGLIRNKADG
ETTDYAASVKGRVTISRDDSKSITSLQMNNLKTEDTAVYYCAR
>V4RF-JYKQ01005763.1-ighv |(2160, 2469)|2.5503924745|(0.961,0.861,0.832)|1
VQCEVQLVESGGGLVQPGASLRLCCAASGFTFSSTRMNWIRQSPGKKLEWVADIKYDGSE
KYYVDSVKGRFTISRDNAKNSLYLQMNSLRAEDTAVYYCVR
>V5RF-JYKQ01005769.1-ighv |(5096, 5411)|2.59039451875|(0.823,1.000,0.986)|1
VQCEVQLVESGGGLAQPGGSLRLSCAASGFTFSDHYMDWVRQAPGKGLEWVGRIRNKANG
YTTEYAASVKGRFTISRDDSKNTLYLQMSSMKTEDTAVYHCAR
>V6RF-JYKQ01005770.1-ighv |(7257, 7566)|2.99798400013|(1.000,0.998,1.000)|1
VQCEVQLVESGGGLVQPGRSLRLSCATSGFTFSNYWMFWVRQAPGKGLEWVSSISGSSSS
TYYPDSVKGRFTISRDNAKNMLYLQMNSLRAEDTAVYYCAR
>V7RF-JYKQ01005771.1-ighv |(8999, 9305)|2.22527103553|(0.780,0.660,0.948)|1
VQCEVQLVEYGGGLVQRGGSLRLSCGFTFSVHFMSWVHQAPAKGLEWVGFMRNKANGGTT
EYATSVKGRSTISRADSKSMASLQMSSLNTEDTAVYYCAR
>V8RF-JYKQ01005772.1-ighv |(16443, 16752)|2.89414901463|(0.984,1.000,0.925)|1
VQCEVQLVESGGGLVQPGGSLRLSCAASGFTFSNYWMNWVRQAPGKGLEWVARIKSKADG
ETANYAASVKGRFTISRDDSKNTLYLQMNSLKTEETAVYYC
>V9RF-JYKQ01005772.1-ighv |(36472, 36781)|2.84477343928|(0.994,0.894,0.996)|1
VQGEVQLVESGGGLAKPGGSLRLSCAASGFTFSSYWMHWVRQAPGKGLEWISAINSAGSS
IYYADSVKGRFTISRENAKNTLYLQMNSLRAEDTAVYYCAK
>V10RF-JYKQ01005773.1-ighv |(3691, 4000)|2.2037736937|(0.914,0.859,0.664)|1
VQCEVQLVESGGGSIQPGASLRLCCAAPGFTFSSTRMNWIRQAPGKKLEWVADIKYDGSE
KYYVDSVKGRFTISRDNAKNSLSLQMNSLRAEDTAVYYCVR
>V11RF-JYKQ01005773.1-ighv |(11326, 11632)|2.38643035002|(0.903,0.965,0.694)|1
CAEVQLVQSGAEVKRPGESLRISCKTSGYSFTSNWISWVRQMPGKGLEWMGMIDPSDSDT
RYSPSFQGQVTISADKSISTTYLQWSSLKASDSATYYCAK
>V12RF-JYKQ01005774.1-ighv |(1635, 1941)|2.38643035002|(0.903,0.965,0.694)|1
CAEVQLVQSGAEVKRPGESLRISCKTSGYSFTSNWISWVRQMPGKGLEWMGMIDPSDSDT
RYSPSFQGQVTISADKSISTTYLQWSSLKASDSATYYCAK
>V13RF-JYKQ01005774.1-ighv |(20410, 20718)|2.37103669184|(0.958,0.736,0.880)|1
VQGGVQLVESEGNFVQPGGSLRLSCAVSGFTFSSYDLDWIRHAPGKGLEWVSGISIAGST
YYANSVKGRFAISIDNAKNTLYLQMNSLIAEDTAIYYCVSE
>V14RF-JYKQ01005774.1-ighv |(31522, 31837)|3.0|(1.000,1.000,1.000)|1
VQCEVQLVESGGGLVQPGGSLRLSCAASGFTFSNYWMNWVRQAPGKGLEWVGFIKNKADG
GTAAYAESVKGRFTISRDDSKNTLYLQMNSLKTEDTAVYYCTR
>V15RF-JYKQ01005777.1-ighv |(21925, 22238)|2.96874467291|(0.994,0.999,0.977)|1
VQCEVQLVESRGGLVQPGGSLRLSCAASGFTFSDYYMHWVRQAQGKGLEWVGLIRNKANS
YTTEYAAAVKGRFTISRDDSKNTLYLQMSSLKTEDTALYYCT
>V16RF-JYKQ01005777.1-ighv |(46860, 47174)|2.38953632408|(0.896,0.726,0.878)|1
VFSQVTLKESGPALVKPTQTLTLTCTFSGFSLSTSGMRVSWVRQPPGKALEWLARIDWDD
DKYYSTSLKSRLTISKDTSKNQVVLTMTNMDPVDTATYYCARG
>V17RF-JYKQ01005784.1-ighv |(1524, 1833)|2.99593600205|(1.000,0.996,1.000)|1
VQCEVQLVESGGGLIQPGGSLRLSCAASGFTFSSYYMYWIRQAPGKGLEWVSAINTGGGS
TWYADSVKGRFTISRENAKNTLYLQMNSLRAEDTAVYYCAK
>V18RF-JYKQ01005787.1-ighv |(1654, 1969)|2.99698000014|(1.000,0.998,0.999)|1
VQCEVQLVESGGGLVQPGGSLRLSCAASGFTFSDHYMDWVRQAPGKGPEWVGFIRNKARG
GTAEYAASVKGRFTISRDDSKNVTYLQMSSLKTEDTAVYYCTT
>V19RF-JYKQ01005787.1-ighv |(14728, 15050)|2.32736340553|(0.910,0.809,0.748)|1
VLSQVTLKESGPALVKPTQTLTLTCTVSGFSLTTSGVGVSWIRQAPGKALEWLAHIYWTD
SKYYSPSLKSRLTISKDTSKNQVVLTITNTDPVDTATYYCARGAQ
>V20RF-JYKQ01005788.1-ighv |(4951, 5260)|2.46917775608|(0.991,1.000,0.725)|1
VLSQVQLQESGPGLVKPSETLSLTCAVSGGSISSYWWGWIRQPPGKGLEWIGIIYGSGGS
NYLNPSLKSRVTLSVDTSKNQFSLKLSSVTAADTAVYYCAR
>V21RF-JYKQ01005789.1-ighv |(14344, 14653)|3.0|(1.000,1.000,1.000)|1
VQCEVQLVESGGGLVQPGGSLRLSCAASGFTFSSYGMHWARQAPGKGLEWVSAINNGGGS
TWYADSVKGRFTISRENAKNTLYLQMNSLRAEDTAVYYCAK
>V22RF-JYKQ01029804.1-trbv |(8296, 8587)|2.21484506203|(0.851,0.684,0.797)|1
PEVTQIPSHQVTQMGQEVILQCVPIPNHLYFYWYRQILGQKVEFLVIFFNNNISEKSEIF
DDRFSVERPDGSNFTLKIKSTKLEDSAMYFCASSE
>V23RF-JYKQ01029805.1-trbv |(2386, 2683)|2.23602934331|(0.948,0.956,0.643)|1
SLDTAVSQTPKYLVTQTGKNEYLKCEQNLGHDTMYWYKQDSKKLLNIMFSYNNKQLIINE
TVPNRISPDSPDKAHLNLHITSLELGDSAVYFCASSQ
>V24RF-JYKQ01029805.1-trbv |(7011, 7308)|2.96668003481|(0.985,0.993,0.989)|1
PIDTGITQTPKHLVMGMTNKKSLKCEQHMGHRAVYWYKQKAKKPPEIMFMYNYETLSINE
SVPSRFSPECSKSSLLYLHLRALQPEDSALYLCASSQ
>V25RF-JYKQ01029807.1-trbv |(1964, 2255)|2.28453520713|(0.959,0.948,0.667)|1
PEVTQTPSHQVTQMGQEVILRCVPISNHLYFYWYRQILGQKVEFLVSFYNGKISEQSEIF
DDRFSVGRSDGVHFTLKIKSTKLEDSAMYFCASSE
>V26RF-JYKQ01029807.1-trbv |(9551, 9848)|1.87668703534|(0.982,0.990,0.504)|1
SLDTAVPQTPKYLVTQTGKEESVKCEQNLGHDAMYWYKQDSKKLLKIMFSYNNKQLFINE
TVSNRFSPDSPDKARLILHIKSLELGDSAVYFCASSQ
>V27RF-JYKQ01029807.1-trbv |(18088, 18388)|2.47114567491|(0.920,0.947,0.735)|1
HTEPEVTQTPSHQVTQMGQEVILRCVPISNHFYFYWYRQILGQKVEFLVSFVNDEISDKS
EMFDDRFSVERPDGSNFTLKIKSTKLEDSAMYFCASSE
>V28RF-JYKQ01029807.1-trbv |(28941, 29238)|2.994900005|(1.000,1.000,0.995)|1
PTDTGVTQTPKHLVMGMTNKKSLKCEQHLGHNAMYWYKQKAKKPPELMFVYQYEKLSINE
SVPSRFSPECSKSSLLYLHLQALQPEDSALYLCASSQ
>V29RF-JYKQ01029807.1-trbv |(39844, 40134)|2.63739703336|(0.907,0.826,0.933)|1
EAGVTQTPRSLIKMRGQQVTLSCSPISGHRSVSWYQQTPGQGLQFLFEYFSETQREKGKF
PSRFSGRQFSNSRSEMNVSTLELEDSALYLCASSL
>V30RF-JYKQ01029809.1-trbv |(772, 1069)|2.99698000014|(0.998,1.000,0.999)|1
PANADVTQSPKFQILKTGQSMTLQCAQDMNHNSMYWYQQDPGMGLRLIHYSATEDTTDPG
EVPDGYSVSRLNKKEFLLKLESAAPSQTSVYFCASSE
>V31RF-JYKQ01029809.1-trbv |(15370, 15683)|2.95954165691|(0.999,0.994,0.970)|1
SLDTAVSQTPKYLVTQTGKNESLKCEQNLGHDTMYWYKQDSKKLLKIMFSYNNKEPILNE
TVPNRFSPKSPDKAHLNLHIKSVELGDSAVYFCASSQDIALQ
>V32RF-JYKQ01029809.1-trbv |(18791, 19104)|2.54492721525|(0.856,0.943,0.792)|1
PMDTGVTQTPRHLVMGMTNKKSLKCEQHLGHNAMYWYKQKARKPPELMFIYNFKEPAENN
SVPSRFVPECPDSSLFYLHLHALQPEDSALYLCASSQDTALQ
>V33RF-JYKQ01029809.1-trbv |(33264, 33561)|2.99696400065|(1.000,1.000,0.997)|1
PVNAGVTQTPKFQILKTGQNMTLKCAQDMNHNYMYWYRQDPGMGLRLIHYSAGEGSTEKG
EVPDGYNASRLNPQNFLLRLESAAPSQTSMYFCASSE
>V34RF-JYKQ01029809.1-trbv |(37007, 37307)|3.0|(1.000,1.000,1.000)|1
HTGAGVSQSPRNKVTEEGKDVVLRCDPISGHTALYWYRQSLGKGLEFLIYFQGNDAPDKS
GLPSGRFSAERTEGSVSTLKIQRTEQGDSAVYLCASSL
>V35RF-JYKQ01029811.1-trbv |(568, 868)|2.97979201242|(0.990,0.994,0.996)|1
HTGAGVSQFPSNKVTEKGKDVALRCDPISGHAVLYWYRQNLGQGLEFLIYFQGTGAVDDS
GLRSDRFSATRPEGSVSTLKIRHTEQGDSATYFCASSL
>V36RF-JYKQ01029811.1-trbv |(5612, 5908)|2.37019663819|(0.948,0.747,0.857)|1
PVDTGVTQSPTHLIKTRGQQVTLRCSPISGHTSVSWYQQAPGQGPQFIFEYANELRTSEG
NFPHRFSGRQFRDYHSEMNVSALELGDSALYLCASSL
>V37RF-JYKQ01029811.1-trbv |(8288, 8584)|2.99498400013|(0.999,0.997,0.999)|1
SVDSGVTQTPKHLITAIGQQVTLRCSPRSGDLSVYWYQQSLGQGLQFLVQYYNGEEREKG
NILERFSAQQFPDLHSELNLSSLELGDSALYFCASSL
>V38RF-JYKQ01041707.1-ighv |(10254, 10563)|2.94526188151|(0.995,0.977,0.976)|1
AHSQVQLVQSGPEVKQPGASVKVSCKASGYSFTTYGMNWVRQAPGQGLEWMGWMNTYTGN
PTYAQGFTERFVFSMDTSVSTVYLQISSLKAEDTAMYYCAR
>V39RF-JYKQ01041713.1-ighv |(30683, 30998)|3.0|(1.000,1.000,1.000)|1
VQCEVQLVESGGGLVQPGGSLRLSCAASGFTFSSSAMHWVRQASGKGLEWVGYIRSKSNN
YATQYAASVKGRFTISRDDSKNTLYLQMSSLKTEDTAMYYCTT
>V40RF-JYKQ01041713.1-ighv |(41631, 41955)|2.78775890313|(0.893,0.979,0.966)|1
VQCEVQLVESGGGLVQPGESLRLSCAASGFTFSDYYMDWVCQAQGRGWSGLATQTLFLNK
ANSYTTEYAASVKGRFTISRDDSENTLYLQTSSMNTEDTAVYYCAR
>V41RF-JYKQ01041713.1-ighv |(51469, 51784)|3.0|(1.000,1.000,1.000)|1
VQCEVQLVESGGGLVQPGGSLRLSCAASGFTFSDHYMQWVRQAPGKGLEWVGFIRSKAYG
GTAEYAASVKGRFTISRDDSKSIASLQMSSLKTEDTAVYYCAR
>V42RF-JYKQ01041713.1-ighv |(65843, 66152)|2.8280917126|(0.991,0.883,1.000)|1
VQCEVQLVESGGGLVKPGGSLRLSCAASGFTFGDYAMSRVRQAPGKGLEWVSSISNTGKT
IYYADSVKGRFTISRDNAKNSLSLQMSSLRAEDTAVYYCAR
>V43RF-JYKQ01041713.1-ighv |(71051, 71357)|3.0|(1.000,1.000,1.000)|1
VQCEVQLVESGGGLVQPGGSLRLSCAASGFTFSSYGMNWVRQAPGKGLEWVSYISSGGST
YYADSVKGRFTISRDNSKNTLSLQMNSLRAEDTAVYYCAG
>V44RF-JYKQ01041718.1-ighv |(4152, 4461)|2.75594651426|(0.960,0.987,0.855)|1
AHSQVQLVQSGAEIKQPGASVKLSCKASGYTFTSYYMHWVRQAPGQGLEWIGLISPYNGN
KGYAQNFQGRVTITADTSTSTGYMELSSLRSEDTAVYYCTR
>V45RF-JYKQ01041718.1-ighv |(11509, 11818)|2.97129965252|(1.000,0.974,1.000)|1
VQGEVQLVESRGGLAKPGGSLRLSCAASGFTFSGYNMYWVRQASGKGLEWVSGISYTGGS
TWYADSVKGRFTISRENAKNTLYLQMNSLRAEDTAVYYCAR
>V46RF-JYKQ01041718.1-ighv |(32027, 32336)|2.99899600001|(1.000,1.000,0.999)|1
VQCEVQLVESGGGLVKPGASLRLSCAASGFTFGDYTMHWVRQAPGKGLEWVSYISSASSY
IHYADSVKGRFTISRDNAKNSLYLQMNSLKTEDTAVYYCTR
>V47RF-JYKQ01041720.1-ighv |(764, 1078)|1.57245688985|(0.898,0.693,0.539)|1
VLSQVTLKESGPALVKPTQTLTLTCTFSGFSLTTSGMGVGWIRQPPGKALEWLANIYWDD
GKYYSPSLKSRLTISKDTSRKQVVLTMTNMDPVDTATYYCARG
>V48RF-JYKQ01051981.1-igkv |(559, 859)|3.0|(1.000,1.000,1.000)|1
ARCDIQMTQSPSSLSASVGDRVTITCQASQGISSWLAWYQQKPGKAPKLLLYKASGLQSG
VPSRFSGSGSGTEFTLTISSLQPEDFATYYCQQFSSAL
>V49RF-JYKQ01051984.1-igkv |(165, 453)|1.89595597654|(0.990,0.519,0.976)|1
IVMTQSPATWALSPGERATLSCRASQSVSSRLAWYQQKPGQAPRLLIYGASSRATGIPDR
FSGSGSGTEFTLTISSLEPEDVGVYYCQQDYSWP
>V50RF-JYKQ01051984.1-igkv |(27105, 27405)|2.96417355698|(0.997,0.976,0.993)|1
ARCDIQMNQSPSSLSASVGDTVTITCRANQGISNNLAWYQQKPGKVPQLLIYYASSLASG
IPSRFSGSGSGTEFTLTISSLQPEDFAAYYCLQHNSYP
>V51RF-JYKQ01051985.1-igkv |(4005, 4303)|2.39550077441|(0.971,0.937,0.718)|1
TTVEIVMTQSPATLSLSPGERATLSCRASQSVSSYLSWYQQKPGQAPRILIYGASSRATG
IPDRFSGSGSGTDFTLTISSLEPEDVGVYFCPQSSNW
>V52RF-JYKQ01052451.1-igkv |(138345, 138660)|2.30347518505|(0.822,0.716,0.810)|1
TSGDILLTQTPLSLPVTTGEPASISCRSSQSLLHSNENTYLHWYLQKPGQSPQLLIYEVS
NRASGVPERLSGSGSDTDFTLKINLVEAEDVGVYYCMQTTQWP
>V53RF-JYKQ01052451.1-igkv |(143240, 143558)|2.97854805197|(0.998,0.990,0.991)|1
SSGDIVMTQTPLSLPVTPGEPASISCRSSQSLLDSEDGNTYLDWYLQKPGQSPQLLIYEV
SNRASGVPDRFSGSGSDTDFTLKISRVEAEDVGVYYCMQALQNP
>V54RF-JYKQ01054915.1-trav |(5555, 5858)|2.17364328324|(0.759,0.694,0.739)|1
MCLILVTTGQNIDQPTEMTAMEGAIVQINCTYQTSGFNGLSWYQQHDGEAPTLLSYNVLD
GLEEKGRFSSFLSNSKRYSYLLLKELQMKDSASYLCAVR
>V55RF-JYKQ01054925.1-trav |(5041, 5338)|2.90424535942|(0.994,0.931,0.995)|1
GLRAQLVTQPEDQVTVAEGNPLTVKCTYSVSGNPYLFWYVQYPNQGLQFLLKYITGDNLV
KGSYGFEAEFNKSQTSFHLKKPSALVSDSALYFCAVR
>V56RF-JYKQ01054933.1-trav |(11630, 11920)|2.99598000014|(0.999,1.000,0.997)|1
MSRGEDVEQSLFLSVREGDISVINCTYTDSSSTYLYWYKQEPGAGLQLLIYILSNMDLKR
DQRVTVLLNKKDKHLSLRIADTQTEDSAIYFCAES
>V57RF-JYKQ01054940.1-trav |(18103, 18397)|2.99899600001|(1.000,1.000,0.999)|1
GINGDSVVQTEGQVLLSEGNSLIVNCSYESTQYPSLFWYVQYPGEGPQLLLKAMKDNDKE
SNKGFEATYRKETTSFHLEKDSVQESDSAVYFCALS
>V58RF-JYKQ01054940.1-trav |(31345, 31638)|2.99392000218|(0.996,0.998,1.000)|1
GSGKNQVEQSPQSLIILEGKNCTLQCNYTVSPFNNLRWYKQDTGKGPISLTIMTFSENTK
SNGRYIATLDADTKQSSLHITAAQLSDSASYICVVS
>V59RF-JYKQ01054940.1-trav |(46970, 47276)|2.99174403277|(1.000,1.000,0.992)|1
VWSQQKEVEQDPGPFSVPEGATVTFNCTYSNSASQSFFWYRQDSRKEPKLLMSAYSSGNE
DGRFTAQLNRASQYISLLIRDSQLSDSATYLCAVYTQCSP
>V60RF-JYKQ01054940.1-trav |(52430, 52727)|2.97097652411|(0.996,0.980,0.996)|1
GTRAQSVTQLDSQVSVSEGAPVLLRCNYSSSVPPYLFWYVQYPNQGLQLLLKYTSGTTLV
KGINGFEAEFKKSETSFHLRKASAHVSDAAEYFCAVS
>V61RF-JYKQ01054942.1-trav |(16188, 16478)|2.98442416586|(0.999,0.987,0.999)|1
VNGENVEQHPSILSVQEGDSSVIKCTYSDSASNYFPWYKQELGKEPQFIIDIRSNAHEKK
DQRITVLLNKTAKHFSLHITETQPGDSAVYFCAAS
>V62RF-JYKQ01054942.1-trav |(38704, 38992)|2.99899600001|(1.000,0.999,1.000)|1
VWSQQKVEQNSGPLSVPEGAIASLNCTYSDRGSQSFFWYRQYSGQSPELLMSTYSSGDKE
DGRFTAQLNRASQYVSLLIRDSQPSDSATYLCAV
>V63RF-JYKQ01054942.1-trav |(45190, 45487)|2.71929316693|(0.971,0.831,0.995)|1
GTKAQSVTQLDSQVSVSEGVPVLLRCNYSSSFPPTLFWYVQYPNQGLQLLLKYTSGTTLV
KGINGFEAEFKKSETSFHLTKASAHVSDAAEYFCAVN
>V64RF-JYKQ01054942.1-trav |(64627, 64920)|2.98521630725|(1.000,1.000,0.986)|1
VSRGESVGLHLPTVSVQEGDNSVINCTYSDSASDYFLWYKQESGKGPQSIIDIRSNMAKR
QGQRLTVFLNKTMKHLSLQIAATEPGDSAVYFCAEN
>V65RF-JYKQ01054942.1-trav |(70517, 70818)|2.91572292008|(1.000,0.999,0.934)|1
SGIAQKITQTQPAMFVQEKEAVTLDCTYDTSDQSYGLFWYKQPSSGEMIFLILQMSYDKQ
NATEGRYSLNFQKARKSVNLVISASQVGDSAMYFCAMR
>V66RF-JYKQ01054942.1-trav |(88856, 89150)|3.0|(1.000,1.000,1.000)|1
RTRGDSVTQMEGPVTLSERAFLTINCTYTATGYPSLFWYVQYPGEGPQLLLKATKTDEKG
SNKGFEATYRKETTSFHLKKDSVQESDSAVYFCALS
>V67RF-JYKQ01054942.1-trav |(113522, 113815)|2.99899200002|(0.999,1.000,1.000)|1
VWSQQKEVEQNPGPLSVPEGATASLNCTYSNSAFQYFMWYRQYSRKGPQLLIYIYSSGNK
EDGRFTAQVDKSSKYISLFIRDSQPNDSATYFCAMS
>V68RF-JYKQ01054944.1-trav |(3305, 3602)|1.63796750815|(0.927,0.776,0.515)|1
TRAQSVTQLDSQVPVFEEAPVLLRCNYSSSSVSVYLFWYVQYPNQGLQLLLKYLSGPTLV
KGINGFEAEFKKSETSFHLRKPSAHISDTAEYFCAVS
>V69RF-JYKQ01054953.1-trav |(3497, 3784)|3.0|(1.000,1.000,1.000)|1
VNSQQGEEDPQTLSIQEGENATMNCSYKTSINNLQWYRQDSGRSLVQLILIRSNEREKNS
GRLRVTLDTSKKSSSLLITASRAADTASYFCATD
>V70RF-JYKQ01054957.1-trav |(3986, 4277)|2.99399200002|(0.998,0.999,0.997)|1
RTNGDSVTQTEGPVTLPERAALTLNCTYQTSYSAFIFWYVQYPNKEPELLLKSSENQETN
SRGFQASHVKSDSSFHLEKPSVQLSDSAVYYCVLR
>V71RF-JYKQ01054957.1-trav |(7206, 7509)|2.95284837921|(0.995,0.999,0.963)|1
SSMAQKVTQAQTEISVVEKEDVTLDCVYETRDTTYYLFWYKQPPSGELVFLIRQNSFDEQ
NEINGRYYSKFQKSTSSFNLTITASQVVDSAVYFCALNE
>V72RF-JYKQ01054957.1-trav |(42945, 43232)|2.9057880379|(0.985,0.976,0.950)|1
LSGEDQVTQSPEALSLQEGDSSSLNCSYTVSGLRGLLWYRQDPGKGPEFLFILYSAGEEK
EKERLKATLTKKESFLHITGPKPEDSATYLCAVQ
>V73RF-JYKQ01054966.1-trav |(1126, 1423)|1.90054647729|(0.728,0.528,0.872)|1
VRGIQVEQSPPDLILQEGANSTLRCNYSATVSSLQWFHQNPWGQLINLFYITSGTKQNGR
LSATTVTKERYSLLHISSSQTTDSGIYFCAVEPQCSP
>V74RF-JYKQ01062966.1-iglv |(12021, 12331)|2.99296800026|(0.999,0.997,0.997)|1
SWAEVVFTQPHSVSGSPGQTVTISCTRSSGSIDSSYVYWYQQRPGSAPTTVIYSDDQRPS
GVPDRFSGSIDSSSNSASLTISGLKSEDEADYYCQSYDSSS
>V75RF-JYKQ01067073.1-ighv |(701, 1007)|2.2543615622|(0.721,0.943,0.931)|1
VRCEVQRVESGGGLVQPGGSLRLSCAASGFTISSSWMNWDFQAPGKGLECVSHIISGGST
DYPDSFKGRFTISRDNTKNTLYVQKNSLRAEDMAVYYCAR
>V76RF-JYKQ01067101.1-ighv |(5042, 5351)|2.9929000027|(1.000,0.997,0.996)|1
TQSQVQLVQSGAEVKKPGASVKLSCKASGYTFTSYGINWVRQAPGQGLEWMGWINPSNGN
TGYAQKFQGRVTMTRDTSTSTAYMELNSLRSDDTAVYYCAR
>V77RF-JYKQ01067101.1-ighv |(30146, 30461)|2.95598664203|(0.999,0.976,0.984)|1
VLSQVQLQESGPGVVKPSETLSLTCAVSGASISSGYYYWSWIRQPPGKGLEWIGGIYSNS
GSTNYNPSLKSRVTISKDTSKNQFSLKLSSVTAADTAVYYCAR
>V78RF-JYKQ01079834.1-igkv |(1757, 2043)|2.54116317779|(0.949,0.768,0.947)|1
IVLTQSPATLALSPGEGATLSCRASQSVSRYSSWYQQKPGQAPRLLIYGASSRATGIPAR
FSGSGSGTDFTLTISSLEPEDVAVYFCQQSNNW
>V79RF-JYKQ01086555.1-ighv |(11851, 12160)|2.94907315918|(0.981,0.970,1.000)|1
VQCEVQLVESGGGVVQPGGSLRLLCAASGFTFDDYAMHWVRQAPGKGLEWVSAISWDGDS
TYYADSVKGRFTISRDNAKNSLYLQMNSLRAEDTAVYYCAR
>V80RF-JYKQ01114545.1-iglv |(3565, 3871)|2.99798400013|(1.000,1.000,0.998)|1
DSETVVTQEPSLSVSSGGTVTLTCGLSSGSVSTSNYPSWYQQTPGQAPRTLIYRTNTRPS
GVPDRFSGSILGNKAALTITGAQADDESDYYCMLYMGSGI
>V81RF-JYKQ01131089.1-trbv |(3084, 3375)|2.5229657026|(0.949,0.805,0.872)|1
AGVAQSPRYKITEKSQAVAFWCDPISGHATLYWYRQILGQGPELLVRFQNEDVVDDSQLP
KDRFSAERLKGVDSTLKIQPAELGDSAVYLCASSL
>V82RF-JYKQ01131090.1-trbv |(8544, 8841)|2.29891640466|(0.885,0.658,0.972)|1
HRDAEITQSPRYKVTETGRKVTLTCHQTWNHNNMFWYRQDLGHGLRLIYYSAGASIIDKG
EVPDGYVVSRSKTEDFPLTLESATRSQTSVYFCASSE
>V83RF-JYKQ01131090.1-trbv |(17704, 17995)|2.38996285646|(0.901,0.890,0.721)|1
AGVVQSPRYKVIEKSQAVTFWCNPVSGHATLYWYRQILGQGLELLVQFRNNDVVDDSQLP
KDRFSAERLKGVNSTLKIQPAELGDSAVYLCASSL
>V84RF-JYKQ01131090.1-trbv |(36297, 36594)|3.0|(1.000,1.000,1.000)|1
PVNAGVTQTPKFQILKTGQSMTLQCAQDMNHDCMYWYRQDPGMGLRLIHYSVGEGSTDKG
EVPDGYNVTRSNTEDFPLRLESAAPSQTSVYFCASSY
>V85RF-JYKQ01131090.1-trbv |(40488, 40788)|2.97002987349|(0.997,0.975,1.000)|1
HTGAGVSQSPRYKVTKRGQDVALRCDPISGHDYLYWYQQAPGQGPAFLTYFQNDAQRDKS
GLPNDRFSAEMPEGSVSTLKIQRTEQGDSAVYLCASSL
>V86RF-JYKQ01131090.1-trbv |(48415, 48705)|2.43418180669|(0.950,0.896,0.749)|1
DAGVTQSPTHLIKTRGQQVTLRCSPISGHTSVYWYQQALGQGLQFILWYDEEEQRDRGTF
PHRFSGRQFPNYSSELNVNASEMGDSALYLCASSL
>V87RF-JYKQ01131090.1-trbv |(54020, 54340)|2.62790692883|(0.929,0.945,0.810)|1
NAGVTQTPKFQVLKTGQSMTLQCAQDMSHNSSYWYGQDPGMGLRLIRYSAAAGVTDKGEV
PSGYNVSRLNTEDFRLRLESAAPSQTSVYFCASSYSPTLQGRLLS
>V88RF-JYKQ01131090.1-trbv |(60130, 60430)|2.99389600501|(1.000,0.995,0.999)|1
HTGAGVSQSPRYKVTKRGQDVALRCDPISGHVALYWYRRTLGQGPEFLTYFQNDAQPDKS
GLPSDRFSAERPEGSVSTLKIQRTEQGDAAVYLCASSL
>V89RF-JYKQ01131091.1-trbv |(1114, 1410)|2.68405999734|(0.972,0.829,0.962)|1
SVDGGVTQSPRHLIKTTGQQVTLRCSPISGHTSVSWYQQALGQGPQFIFEYYEEKERERG
NFPDRFSGHQFPNYSSELNVNALEAGDSALYLCASSL
>V90RF-JYKQ01131092.1-trbv |(9, 305)|2.68405999734|(0.972,0.829,0.962)|1
SVDGGVTQSPRHLIKTTGQQVTLRCSPISGHTSVSWYQQALGQGPQFIFEYYEEKERERG
NFPDRFSGHQFPNYSSELNVNALEAGDSALYLCASSL
>V91RF-JYKQ01131092.1-trbv |(3324, 3621)|2.97841612211|(0.995,1.000,0.984)|1
LVNAGVTQTQKFQVLKTGQSMTVQCAQDMNHDCMYWYRQDPGMGLRLIHYSDAAGTTDKR
EVPSGYNVSRLNIEDFPLRLESAAPSQTSVYICASSY
>V92RF-JYKQ01131093.1-trbv |(3504, 3804)|2.22026641182|(0.967,0.978,0.634)|1
HTGARVSQSPRYKVTKRGQDVALRCDPISGHDYLYWYQQVLEQGPELLTYFSYGAQQDKS
GLPGDRFSAERPEGSVSTLQIQHTQQGDSAVYPCASSL
>V93RF-JYKQ01131093.1-trbv |(13830, 14126)|2.21081778804|(0.936,0.832,0.694)|1
SVDAGVTQSPTHLIRKRGQQVTLRCSPISGHNTVSWYKRALGQGPQFIFQYYEKEERERG
NFPGRFSGHQFPNYSSELNVNASEMGDSALYLCASSL
>V94RF-JYKQ01131093.1-trbv |(22892, 23189)|2.99799200002|(1.000,0.999,0.999)|1
PGNAGVTQTPKFQILKTGQSMTLQCAQDMNHNYMSWYRQDPGVGLRLIHYSVGAGVTDKG
EVSNGYNVSRLNTEDFPLSLESAASSQTSVYFCASSY
>V95RF-JYKQ01131094.1-trbv |(5376, 5676)|2.99080001921|(0.999,0.992,1.000)|1
HTGAGVSQFPRYRVTKRGQDVTLRCDPISGHEYLYWYQQAPGQGPELLTYFQNDAQLDKS
GLPSDRFSAERTEGSVSTLKIQRTEQGDSAVYLCASSL
>V96RF-JYKQ01131094.1-trbv |(13819, 14115)|2.97974403277|(0.996,0.988,0.996)|1
PVDTGVTQSPTHLIKTRGQQVILRCSPISGHSSVYWYQQALGQGPQFIFEYYEKEERGRG
NFPDRFSGRQFPNYSSELNVSALLLGDSALYLCASSL
>V97RF-JYKQ01131094.1-trbv |(21287, 21594)|2.97399200002|(0.992,0.991,0.991)|1
PGNADVTQTPKFQVLKTGQSLTLQCAQDMNHNYMYWYRQDPGMGLRLIHYSVGAGITDKG
EVPNGYNVFRLNTEDFPLRLESAALSQTSVYFCASSDTTV
>V98RF-JYKQ01131095.1-trbv |(9158, 9454)|2.96748712253|(0.999,0.974,0.997)|1
PVDTGVTQSPTHLIKMRGQQVTLRCSPISGHSSVSWYQQALGQGPQFIFQYYEKEERGRG
NFPDRFSGRQFPNYSSELNVSALLLGDSALYLCASSL
>V99RF-JYKQ01131096.1-trbv |(2555, 2846)|2.98874403277|(0.999,0.999,0.991)|1
NAGVTQTPKFQVLKTGQSMIVQCAQDMKHDYMFWYRQDPGMGLRLIYYSVTAGITTKGEV
PNGYNVSRINTEDFLLRLESAAPSQTSVYFCASSY
>V100RF-JYKQ01131098.1-trbv |(4345, 4645)|2.98660007999|(0.999,0.989,0.999)|1
HTGAGVSQSPRYKVIKKGQDVALRCDPISGHAGLYWYQQALGQGPEFLTYFNYQAQPDKS
GLPNDRFSAERHEGSVSTLTIQRTEQQDSAVYLCASSL
>V101RF-JYKQ01131101.1-trbv |(106, 402)|2.14753259877|(0.918,0.966,0.602)|1
PVDAGVAQSPTHLIKTRGQQVTLRCSPISGHNTVYWYQQALGQGPQLIFQYYRGEDRGRG
NFPDRFSGHQFPNYSSELNVSALLLGDSALYLCASSL
>V102RF-JYKQ01131101.1-trbv |(9053, 9353)|2.99393200206|(0.999,0.995,1.000)|1
HTDARVSQDPRHKITKTGQNVSFKCVPISEHNRLYWYRQTLGQGPEFLTYFQNEAQQDRS
GLFSDRFSAERPEGSISTLMIQHTEQGDSAVYLCASSL
>V103RF-JYKQ01131101.1-trbv |(23980, 24277)|2.99392000218|(1.000,0.998,0.996)|1
HMDAGITQSPRHKITETGTPVTLRCHQTENHRYMYWYRQDLGRGLRLIHYSYGVEDTDKV
EVSDGYSVSRSKTEDFLLTLESATRSQTSVYFCASSE
>V104RF-JYKQ01131101.1-trbv |(35047, 35338)|1.75118444996|(0.951,0.522,0.844)|1
AGVTQSPRYKITEKKQPVAFWCNPISGHNTLYWYRQNSGQGPELLVRYENEEAVDDSQLP
KDRFSAERLKGVDSTLRIQPAELGDSAVYLCASSL
>V105RF-JYKQ01131102.1-trbv |(2948, 3248)|2.96854104219|(0.997,0.995,0.978)|1
HTDAGVIQSPRHKVTEMGKEVTLRCEPISGHTYLFWYRQTMMQGLEFLIYFNNKDPTDDS
GMPKDRFSAKMPNASFSTLKIQPSEPRDSAVYFCASSL
>V106RF-JYKQ01131102.1-trbv |(18186, 18486)|2.2245147469|(0.789,0.948,0.654)|1
LIDAGVTQTPRHKVTEMGQEVTMRCQPILGHNTVFWYRQTMMQGLELLVYLRNKASLDDS
GMPKDRFSAEMPNASLATLKIQPSEPRDSAVYLCASGL
>V107RF-JYKQ01131102.1-trbv |(25139, 25439)|2.48773678512|(0.985,0.989,0.735)|1
HTEAGVTQFPSHRVIEKGQTVTLRCDPISGHDYLYWYRRVMGKEIKFLISFMRVSTQDES
GMPNKRFSAERTGGTYSTLKVQPAELEDSGVYFCASSQ
>V108RF-JYKQ01131102.1-trbv |(30162, 30459)|1.58636603412|(0.918,0.611,0.639)|1
HGDVMVIQNPRYQVTQLEKPVTLSCSQNLNHKVMYWYQQKPSQAPKLLFHYYDKDFNNEA
DTPDNFQSRRPNTSFCFLDIRSPGLEDAAVYLCASSK
>V109RF-JYKQ01131102.1-trbv |(35121, 35421)|2.42556840852|(0.991,0.985,0.714)|1
SPGEEVTQTPKHLVKGEGQKAKLYCDPIKGHSYVFWYQQVLRKEFKFLISFQNKNVFDET
GMPKERFSAKCHANSPCSLEIQATKLKDSAVYFCASSQ
>V110RF-JYKQ01131103.1-trbv |(16377, 16677)|1.84087430491|(0.789,0.572,0.690)|1
LSNAGITQNPRHLVRRRGQEARLRCSPTKEHSHVYWYRQLPEEGLKFMVYLQKEKIIDES
GMPKEQFSAEFPKEGPSILRIQQAEQEDSAAYFCASSP
>V111RF-JYKQ01131104.1-trbv |(2283, 2580)|2.95654165691|(0.998,0.993,0.969)|1
TVDGGITQSPKYVFRKEGQNVTLSCEQNLNHNAMYWYRQDPGQGLRLIYYSQIVNDIQKG
DIAEGYSVSRERKQSFPLTVTSAQRNPTAFYLCASSI
>V112RF-JYKQ01131104.1-trbv |(20313, 20613)|2.58281380597|(0.938,0.829,0.877)|1
STDTKVTQRPRLLVKANGQKAKMDCVPVKGHSYVYWYRKKLDEELKFLVYFQNEEIIQKA
EIINERFSAQCPQNSPCTLEIQSTESGDAALYYCASSK
>V113RF-JYKQ01131105.1-trbv |(770, 1075)|2.97280001921|(0.993,0.994,0.986)|1
SFHAEVTQTPGYLVKGKGQKTKMDCTPEKGHTYVYWYQQNQNKEFTFLISFQDEQVLQET
ELHKKRFSSQCRKNLPCSLEIPSSEPGDTALYLCASSQST
>V114RF-JYKQ01131107.1-trbv |(8150, 8448)|2.94572941874|(0.994,0.999,0.958)|1
SMDADVTQTPRNKIAKTGKRIMLECSQTKGHDQMYWYRQDPGLGLRLIYYSFDVQDINKG
EISDGYSVSRQEQAKFSLSLESATPNQTALYFCATSD
>V115RF-JYKQ01131107.1-trbv |(16640, 16937)|2.39007568096|(0.962,1.000,0.690)|1
LMEADIYQNPRHRVIGTGKKITLECSQTMGHDKMYWYQQDPGMELHLIHYSYGVNSTERG
DYSSKSTVSRLRIEHFPLTLESTSPSHTSQYLCASSE
>V116RF-JYKQ01131110.1-trbv |(21384, 21680)|2.4089796803|(0.968,1.000,0.698)|1
PLEAQVTQNPRYLITVTGKKLTVTCSQNMNHEYMSWYRQDPGLGLRQIYYSSNVELVDKG
DIPEGYNVSRKEKTTFPLILESPSPSQTSLYFCASSY
>V117RF-JYKQ01131110.1-trbv |(26751, 27058)|2.98474002125|(0.996,1.000,0.989)|1
LVDVKVTQSSRYLIKRTGEKVFLECVQDMDHERMFWYRQDPGLGLRLIYFSYDVKLNEKG
DIPEGYSVSREKKERFSLILGSTSTNQTSMYLCASSLSTA
>V118RF-JYKQ01131111.1-trbv |(5907, 6210)|2.9793601679|(0.988,0.992,1.000)|1
SVFSAVISQKPSRDVCQRGTSVTFQCQVDSQVTMMFWYRQRPGQSMTLIATANQGSEATY
ESGFVIDKFPISRPNLTFSTLTVSNTSPEDSSIYLCSVE
>V119RF-JYKQ01135385.1-trdv |(1626, 1927)|2.89217365357|(0.995,0.983,0.931)|1
SGMAQTVTQSQPEVSVREAETVTLSCTYDTSESNYYLFWYKQPPSRQMILIIRQEAYKQQ
NATENRFSVNFQKAAKSFSLKISDSQLGDAAMYFCAFM
>V120RF-JYKQ01135388.1-trav |(4501, 4803)|3.0|(1.000,1.000,1.000)|1
SGMAQTVTQSQPEMSVQEAETVTLSCTYDTSESNYYLFWYKQPPSRQMILIIRQEAYKQQ
NATENRFSVNFQKATKSFSLKISDSQLGDAAMYFCAYRS
>V121RF-JYKQ01135389.1-trav |(2804, 3092)|3.0|(1.000,1.000,1.000)|1
LSGELKVGQNPLFLSTQEGKNYTIYCNYSTASDRLYWYRQDPGKSLESLFVLLSNGAVKQ
EGRLMASLDTKARLSSLHITAALQDLSATYFCAV
>V122RF-JYKQ01135389.1-trav |(19852, 20154)|1.55860810956|(0.560,0.477,0.873)|1
VSAAKNEVEQSPQDLTAQEGEFITINCSYSIGINSLHWLQQHPGGGIVSLFMLSSEKKKN
GRLIATINTQERHSSLHIAASQPRDSAIYICAVRHSALQ
>V123RF-JYKQ01187326.1-igkv |(1372, 1659)|2.62207451259|(0.997,0.789,0.995)|1
TVVTQSPATLSVSPGERATISCRTSQSVGSRLAWYQQKPGQAPRLLIYGASNRATGIPDR
FSGSGSGTDFTLTISSLKPEDAAVYYCQQDNDWK
>V124RF-JYKQ01187337.1-igkv |(7825, 8116)|2.99499200002|(0.999,0.998,0.998)|1
IVLTQSPTSMAVSQGERVTISCTASSSVSTSYLHWYQQKPGFPPRLLVYRTSNLASGVPA
RFSGSGSGTSYTLTISSMEAEDAANYYCQQGNSIP
>V125RF-JYKQ01245859.1-ighv |(891, 1200)|2.99899600001|(1.000,1.000,0.999)|1
AHSQVQLVQSGAEVKKPGASVKVSCKASGYTFTDYYMHWVRQAPGQGLEWIGWINPYNGN
TKYAQKFQGRVTMTRDTSTSTAYMELSSLRSEDTAVYYCAR
>V126RF-JYKQ01245874.1-ighv |(7328, 7639)|2.95279341439|(0.999,0.963,0.996)|1
VRCEVQLVESGGGVVQPEGSLRLSCAASGFTFDDYAMHWVRQAPGKGLEWVSGISWNGDS
TYYADSVKGRFTISRDNAKNSLFLQMNRLRAEDTAVYYCAKD
>V127RF-JYKQ01245874.1-ighv |(37996, 38302)|2.99899200002|(0.999,1.000,1.000)|1
VQCEEQLVESGGGLVQPGASLRLSCAASGFTFSSYDMHWVRQAPGKGLEWVSAISIGGGT
YYPDSVKGRFTVSRDNAKNSLYLQMNSLRAEDTAVYYCAR
>V128RF-JYKQ01245876.1-ighv |(15391, 15700)|2.44947918403|(0.968,0.989,0.717)|1
VLSQLQLQESGPGVVKPSETLSLTCAVSGGSISSYWWGWIRQPPGKGLEWIGSIYGSGGS
NYLNPSLKSRVTLSVDTSKNQFSLKLSSVTAADTAVYYCAR
>V129RF-JYKQ01245876.1-ighv |(36255, 36564)|3.0|(1.000,1.000,1.000)|1
VQCEVQLVESGGGLVQPGGSLRLSCAASGFTFSSYWMNWVRQAPGKGLEWVSRINSDGSS
TNYADSVKGRFTISRENAKNSLYLQMNSLRAEDTAVYYCTT
>V130RF-JYKQ01245880.1-ighv |(7638, 7950)|3.0|(1.000,1.000,1.000)|1
VQCEVQLVESGGGLVQPGGSLRLSCVASGFTFSDYYMHWARQAPGKGLEWVSRISSGSGS
STYYPDSVKGRFTISRDNAKNTLYLQMNSLRAEDTAVYYCAR
>V131RF-JYKQ01245881.1-ighv |(6177, 6492)|2.99796800026|(0.998,1.000,1.000)|1
VQCEVQLVESGGGLVQPGGSLRLSCAASGFTFSDHYMDWVRQAPGKGLEWVGFIKNKADG
GTADYAASVKGRFTISRDDSKNTLYLQMNSLKTEDTAVYYCTR
>V132RF-JYKQ01245882.1-ighv |(18027, 18336)|2.64099606504|(0.988,0.937,0.826)|1
AHAQVQLVQSGAEVKQPGASVKVSCKASGYTFTSYGMNWVRQAHGQRLEWMGWINTNTGN
PTYAQGFKERFTFSMDTSISTAYLQISSLKAEDTAVYYCAR
>V133RF-JYKQ01245882.1-ighv |(35101, 35410)|2.75115893582|(0.960,0.915,0.899)|1
AHSEVQLVQSGAEVKKPGATVKISCKASGYTFTDYYLHWVRQAPGKGLEWMGRVDPEDGE
ADYAQKFQDRLTMTADTSTDTAYMELSSLRSEDTAVYYCTR
>V134RF-JYKQ01245886.1-ighv |(241, 551)|2.99293600205|(0.999,0.999,0.995)|1
FQCEVQLVESGGGLVQPGGSLRLSCVASGFTFSDHYMDWVRQAPGKGLEWVSSISTGSGS
TTLYPDSVKGRFTISRDNAKNTVYLQMNSLRAEDTAVYYCA
>V135RF-JYKQ01245888.1-ighv |(1665, 1980)|2.99899600001|(1.000,0.999,1.000)|1
VQCEVQLVESGRGLVQPGGSLRLSCAVSGFTFSDHYVSWVRQAPGKGLEWVGFMRNKANG
GRTEYAASVKGTFTISRDDSKSIASLQMSSLKTEDTAVYYCAR
>V136RF-JYKQ01245888.1-ighv |(18543, 18855)|3.0|(1.000,1.000,1.000)|1
VLSQVQLQESGPGVVKPSETLSLTCAVSGGSISDSYYWSWIRQAPGKGLEWIGGIYGSGS
STNYNPSLKSRVTISKDTSKNQFSLKLSSVTAADTAVYYCAR
>V137RF-JYKQ01245889.1-ighv |(13016, 13325)|3.0|(1.000,1.000,1.000)|1
VQCEVQLVESGGGLAQPGGSLRLSCAASGFTFSSYGMSWVRQAPGKGLEWVSGISNTGGS
IYYADSVKGRFTISRDNSKNTLSLQMNSLRAEDTAVYYCAK
>V138RF-JYKQ01245890.1-ighv |(4928, 5237)|2.99899600001|(1.000,1.000,0.999)|1
VQCDVQLVESGGGLVKPGGSLRLSCVASGFTFSSYAMHWVRQAPGKGLEWVSVISTSGGT
TYYADSVKGRFTISRDNAKNSLFLQMNSLRAEDTAVYYCTR
>V139RF-JYKQ01245900.1-ighv |(4135, 4449)|1.90888414634|(0.928,0.526,0.931)|1
VLSQVTLKESGPALVKPTQTLTLTCTFSGFSISTTGTGVGWIRQPPGKALEWLASIYWND
SKYYSTSLKSRLTISKDTSKNQVVLTMTNMDPVDTATYYCARV
>V140RF-JYKQ01245904.1-ighv |(629, 938)|2.99798400013|(1.000,1.000,0.998)|1
VQCEVQLVESGGGVVQPGGSLRLSCAASGFTFDDYAMGWVRQAPGKGLEWVSAISWDGDS
TGYADSVKGRFTISRDNAKNSLSLQMNSLRAEDTAVYYCAR
>V141RF-JYKQ01005004.1-igkv |(7879, 8179)|2.99899600001|(1.000,1.000,0.999)|-1
TTGETVMTQSPATLSLSPGERATLSCRASQSVGSSLAWYQQKPGQAPRLLVYYASSRATG
IPDRFSGSGSGTDFTLTISSLDPEDVGVYYCQKYNDWP
>V142RF-JYKQ01005007.1-igkv |(665, 964)|2.994900005|(1.000,0.995,1.000)|-1
TTGEIVMTQSPATLSLSPGERATLSCRASQSVGSYLAWYQQKPGQAPRLLIYGASSRATG
IPDRFSGSGSGTEFTLTISSLEPEDFAVYYCQQYNNWN
>V143RF-JYKQ01005012.1-igkv |(8346, 8639)|2.99385601037|(1.000,1.000,0.994)|-1
ARCDIQMTQSPSSLSASVGDRVTITCRASQGISTYLNWYQQKPGKAPKLLIYAASSLQSG
VPSRFSGSGSGTVFTLTISSLQSEDFATYYCLQYNS
>V144RF-JYKQ01005013.1-igkv |(2914, 3214)|3.0|(1.000,1.000,1.000)|-1
AKCDIQMTQSPSSLSASVGDRVTITCRASQGISSYLAWYQQKPGKAPKPLIYYASNLESG
VPSRFSGSGSGTDFTLTISSLQPEDFATYYCQQYNSAP
>V145RF-JYKQ01005014.1-igkv |(6504, 6804)|3.0|(1.000,1.000,1.000)|-1
ARCDIQMTQSPSSLSASAGDRVTITCRASQGISSYLAWYQQKPGKAPKLLIYDASNLQSG
VPSRFSGSGSGTEFTLTISSLQPEDFAVYYCQQRNSYP
>V146RF-JYKQ01005017.1-igkv |(2312, 2623)|2.06709666603|(0.647,0.761,0.757)|-1
TTGEIVLTQSPATLSLSPGETATLSCRASESVGSYLAWYQQKPGQAPKLLVHSAYFRATG
IPDRFSGSGSRTEFTLTISSLEPEDVGVYHCQQYHDWSPTVI
>V147RF-JYKQ01005018.1-igkv |(609, 897)|2.98874403277|(0.999,0.991,0.999)|-1
IVLTQSPGTLSLSPGERATLSCRASQSVSSSLAWYQQKPGQVPRLLIYGASSRATGIPDR
FSGSGSGTEFTLTISSLEPEDFAVYYCQQYSNWP
>V148RF-JYKQ01005018.1-igkv |(13195, 13495)|3.0|(1.000,1.000,1.000)|-1
ARCDIQMTQSPSSLSASVGDRVTITCRASQGISTYLNWYQQKPGKAPKLLIYAASRLESG
VPSRFSGSGSGTEFTLTISSLQPEDFATYYCQQYNSNP
>V149RF-JYKQ01005019.1-igkv |(2049, 2337)|2.98874403277|(0.999,0.991,0.999)|-1
IVLTQSPGTLSLSPGERATLSCRASQSVSSSLAWYQQKPGQVPRLLIYGASSRATGIPDR
FSGSGSGTEFTLTISSLEPEDFAVYYCQQYSNWP
>V150RF-JYKQ01005022.1-igkv |(4846, 5146)|3.0|(1.000,1.000,1.000)|-1
ARCDIQMTQSPSSLSASAGDRVTITCRASQGISTYLNWYQQKPGKAPKLLIYAASSLQSG
VPSRFSGSGSGTEFTLTISSLQPEDFATYYCQQYNSYP
>V151RF-JYKQ01005026.1-igkv |(2797, 3089)|3.0|(1.000,1.000,1.000)|-1
AKCDIQMTQSPSSLSASVGDRVTITCRASQTISSYLAWYQQKPGKVPKLLIYAASSLESG
VPSRFSGSGSGTEFTLTISSLQPEDFATYYCQQHN
>V152RF-JYKQ01005027.1-igkv |(25376, 25667)|2.99186400565|(1.000,0.995,0.997)|-1
DIQMTQSPASLSASVGDRVTITCRASQSFSSSLAWYQQKPGKAPKLLIYSASSLQSGVPS
RFSGSKSGTDFTLTISSLQPEDIASYYCQQYYSTP
>V153RF-JYKQ01005032.1-igkv |(9334, 9634)|2.99798400013|(1.000,0.998,1.000)|-1
TTGQVILTQSPATLSLSPGERATLSCRASQSVSSNLAWYQQKPGQAPRLLIYGASSRATG
IPDRFSGSGSGTEFTLTISSLEPEDFAVYYCQKYSSSP
>V154RF-JYKQ01005032.1-igkv |(50469, 50773)|2.02852072039|(0.668,0.685,0.677)|-1
SIGDIELTQTLHSLPVNPGEPASISCQSSQSLLHSDGKTYFYWFLQKPGQHPRHPIYWVS
NWNSGVPDRFSGSGAGTDFTLRISVVEAEDVGVYYYMQV
>V155RF-JYKQ01005033.1-igkv |(2883, 3181)|2.84701501984|(1.000,0.894,0.997)|-1
SKGEIVLTQSPAFRSVTLKEKVTITCQASQSIGSSLHWYQQKPDQSPKLLIKYASQSISG
VPSRFSGSGSGTDFTLTINSLEAEDAATYYCQQSRSF
>V156RF-JYKQ01005040.1-igkv |(7064, 7364)|2.53096374525|(0.986,0.995,0.750)|-1
TRCAIQMTQSPSSLSASVGDRVTITCRASQSIGSNLAWYQQKPGKVPKLLIYAASTLQSE
VPSRFSGSGSGADFTLTISSLQPEDVATYYCQKCDSAP
>V157RF-JYKQ01005045.1-igkv |(2627, 2942)|2.49419763699|(0.947,0.996,0.731)|-1
SSGDIVMTQTPLSLPVTPGEPASISCRSSQSLLHSDGYTYLDWYLQKPGQSPQLLIHGGS
NRASGVPDRFSGSGSGTDFTLKISKVEAEDVGVYYCMQHRALP
>V158RF-JYKQ01005048.1-igkv |(219, 521)|2.66167912623|(0.978,0.906,0.856)|-1
SSGDVVMTQSPLSLPVTPGQPASISCRSSQSLVHSNGNTYLSWLQQKPGQPPRLLIYKVS
NRDSGVPDRFSGSGAGTDFTLKISRVEAEDVGVYYCVQV
>V159RF-JYKQ01015003.1-ighv |(1329, 1641)|2.99698000014|(0.998,0.999,1.000)|-1
VLSQVQLQESGPGLVKPSETLSLTCAVSGGSISGSYGWNWIRQPPGKGLEWIGRIYGSSG
NTYYNPSLKSRVTISRDTSKNQFSLKLSSVAAADTAVYYCAR
>V160RF-JYKQ01015024.1-ighv |(3039, 3348)|2.44463425252|(0.880,0.750,0.880)|-1
AHSQEQLVQSGAEVKKPGASVKVSCKASGYIFTGYIISWLRQAPGQGFEWMGGIHPGYGS
TSYAQKFQGRVTMTGDTSTSTVYMELSSLRSEDTAMYYCAA
>V161RF-JYKQ01015026.1-ighv |(1663, 1972)|2.96266005261|(0.990,0.981,0.992)|-1
AHSEMQLVQSEAEVKKPGASVKVSCKASGYTFTYRYLHWVRQTPGQGLEWMGWITPYNGN
TNYAQKFQGRVTITRDRSMSTAYMELSSLRSEDTAVYYCAR
>V162RF-JYKQ01026643.1-trav |(15229, 15519)|2.45167677197|(0.875,0.736,0.925)|-1
VSSEDKVMQNPLSLVVHEGDTVTLNCSYEVANFRSLLWYKQEKKAPIFLFTLTSSGIEKK
SGRLSSILDKKDLYSILNITATQTRDSAVYLCAVE
>V163RF-JYKQ01026644.1-trav |(630, 917)|2.09391313891|(0.666,0.738,0.885)|-1
VTSQELEQSPQSLIVQEGKNLTINCTSSKTLYGLHWYKQKYGEGLIFLMMLQQGGEEKSH
EKITAKLDEKKQQSFLHITASQPSHAGIYLCGGD
>V164RF-JYKQ01026645.1-trav |(2233, 2520)|2.15106576492|(0.690,0.721,0.885)|-1
VSSQELEQSPQSLIVQEGKNLTINCTSSKTLYGLHWYKQKYGEGLIFLMMLQQGGEEKSH
EKITAKLDEKKQQSFLHITASQPSHAGIYLCGGD
>V165RF-JYKQ01026655.1-trav |(5208, 5498)|2.46253104629|(0.893,0.793,0.831)|-1
TIIDAKTTQPTSMDCAEGRAANLPCNHSTISGSEYVYWYRQIHSQEPQYVIHGLKNNETN
VMASLIITEDRKSSTLILPHATLRDTAVYYCIVRG
>V166RF-JYKQ01026663.1-trav |(902, 1202)|2.89902032645|(0.969,0.976,0.955)|-1
SSVAQKVTQTQSSVSMPVEKAVTLNCQYETSRWSYYLFWYKQPPSKEMIFLIRQGSSEPN
AKSGRYSVNFQKAASSIALTISALQLEDSATYFCALWE
>V167RF-JYKQ01026665.1-trav |(1710, 2010)|2.44251226488|(0.894,0.795,0.816)|-1
SSVAQKVTQAQSSVSMPVGKAVTLNCQYETSWWSYDLFWYKQPPSKEMIFLIRQGYSEQN
ARNGRYSVNFQKAASSIALTISALQLEDSATYFCALRE
>V168RF-JYKQ01042840.1-ighv |(1682, 1994)|2.30365940917|(0.934,0.688,0.901)|-1
VLSQLQLQESGPGLVRPSETLSLICTVSGGSISDSYYWNWIRQPPGKGLEWIGNIYGGGG
STNYNPSLKSRVTISKDASKNQFSLKLSSVTAADTAVYYCAR
>V169RF-JYKQ01042857.1-ighv |(1035, 1344)|2.70513028259|(0.979,0.990,0.826)|-1
AQSQVQLVQSGAEVKKPGASVKLSCKASGFTFGSYAISWVRQAPGQGLEWMGEIIPAFGI
ADYAQKFQGRVTITADTSTNTAYMELSSLRSEDTAVYYCAR
>V170RF-JYKQ01042859.1-ighv |(151, 465)|1.65277151814|(0.843,0.702,0.522)|-1
VLSQVTLKESGPALVKPTQTLTLTCTFSGFSISTSGMGVSWIRQPSGKALEWLALIYWND
DKYYSPSLKSRLTISKDTSKNQVVLTMTNMDPVDTATYYCARV
>V171RF-JYKQ01042861.1-ighv |(9368, 9683)|3.0|(1.000,1.000,1.000)|-1
VQCEVQLVESGGGLVQPGGSLRLSCAASGFTFSDYYMYWVRQAPGKGLEWVGFIRSKAYG
GTAEYAASVKGRFTISRDDSKSIASLQMNSLRAEDTAVYYCTR
>V172RF-JYKQ01044654.1-igkv |(1250, 1550)|3.0|(1.000,1.000,1.000)|-1
ARCDIQMTQSPSSLSASVGDKVTITCHASQGISSWLAWYQQKPGKAPKPLIYKASSLQSG
VPSRFSGSGSGTDFTLTISSLQPEDFATYYCQQNSSSP
>V173RF-JYKQ01044659.1-igkv |(1025, 1322)|1.82711140098|(0.850,0.579,0.719)|-1
TTGETVLTQSPATLYLSPGERATLSCRASQSVGSYLAWYQQKPGQAPRLLICGASSRAAG
IPARFSGSGSGTDFTLTISSLEPEDFAVYFCLQRETG
>V174RF-JYKQ01044662.1-igkv |(2570, 2870)|3.0|(1.000,1.000,1.000)|-1
AKCDIQMTQSPPSLSASVGDRVTITCRASQGISNWLAWYQQKPGEAPKLLIYAASTLQSG
VPSRFSGSGSGTEFTLTISSLQPEDFATYYCQQHNSYP
>V175RF-JYKQ01052437.1-igkv |(14196, 14511)|2.27308347854|(0.953,0.684,0.899)|-1
SSGDVVMTQSPLSLPVTPGQPASISCRSSQSLVHSNGNTYLNWFQQKPGQPPRLLIYKVS
NRYSGVPDRFSGSGAGTDFTLKISRVEAEDVGIYYCMQSIHLP
>V176RF-JYKQ01052439.1-igkv |(123, 425)|2.97851211712|(0.997,0.996,0.986)|-1
SSGDVVMTQSPLSLSVTIGQPASISCRSSQSLVHSDGKTYLNWLQQKPGQPPRRLIYQVS
NRDSGVPDRFSGSGAGTDFTLKISRVETEDVGVYYCVQG
>V177RF-JYKQ01052440.1-igkv |(29428, 29728)|2.99389600501|(1.000,0.999,0.995)|-1
ARCDIQLTQSPSSLSASVGDRVTITCQASQGISNNLAWYQQKPGKVPKLLIYAASTLQSG
VPSRFSGSGSGTDFTLTISSLQPEDFATYYCQHGYGTP
>V178RF-JYKQ01052440.1-igkv |(44786, 45101)|2.30850217163|(0.975,0.672,0.969)|-1
SSGDIVMTQTPFSLPVTPGEPASISCRSSQSLLHSDGRTYLYWYLQKPGQPPRLLIYRVS
NRFSGVPDRFSGSGSGTDFTLKISRVEAEDVGVYYCMQALQNP
>V179RF-JYKQ01052440.1-igkv |(49779, 50094)|2.69070373172|(0.953,0.881,0.892)|-1
SSGDIVMTQTPLSLPVTPGEPASISCRSSQSLLHSNGNTYLHWYLQKPGQSPQLLFYGGS
NRASGVPDRFSGSGSGTDFTLKISKVEAEDVGVYYCVQAIAFP
>V180RF-JYKQ01052440.1-igkv |(68584, 68899)|2.54157958563|(0.989,0.760,0.982)|-1
SSGDIVMTQTPLSLPVTAGEPASISCRSSQSLLHSNGNTYLYWYLQKPGQPPWLLIYRVS
NRFSGVPDRFSGSGSGTDFTLKISRVEAEDVGVYYCMQALQTP
>V181RF-JYKQ01052440.1-igkv |(90005, 90305)|3.0|(1.000,1.000,1.000)|-1
ARCDIQMTQSPSSLSASVGDRVTITCRASQGISNYLNWYQQKPGKAPKLLIYRASNLETG
VPSRFSGSGSGTDFTLTISSLQPEDIATYYCQKHDNSP
>V182RF-JYKQ01052440.1-igkv |(99434, 99748)|1.9703533234|(0.966,0.797,0.648)|-1
SSGDVVMTQTPLSLPVTPGEPASISCRSSQSLLHSNGNTYLHWYLQKPGQSPRLLIYKVT
NRESGVPDRFSGSGSGTDFTLKISRVEPEDVGVYYCMQNTKAP
>V183RF-JYKQ01052440.1-igkv |(120035, 120335)|2.99598400013|(0.998,0.998,1.000)|-1
ARCDIQMTQSPSSLSASIGDRVTITCRASQNIYSNLAWYQQKPGKAPKPLIYYASSVETG
VPSRFSGSGSGTDYTLTISSLQPEDVATYYCQQYDNSP
>V184RF-JYKQ01052441.1-igkv |(8581, 8881)|2.99899600001|(1.000,0.999,1.000)|-1
ARCDILMTQSPASLSASVGDRVTITCRASQGISNYLAWYQQKPGETPKLLIYAASSLQSG
IPSRFSGSGSGTDFTLTISSLQPEDFATYYCQHYYSTP
>V185RF-JYKQ01052442.1-igkv |(12441, 12756)|2.62625363152|(0.977,0.819,0.933)|-1
TSGDIVMTQTPLSLPVTPGEPASISCRSSQSLLHSGGKTYLYWYLQKPGQSPQLLIQEVS
NRASGVPDRFSGSGSGTDFTLKISRVEAEDVGVYYCMQGIQLP
>V186RF-JYKQ01052443.1-igkv |(11550, 11850)|2.99899600001|(1.000,0.999,1.000)|-1
ARCDIQMTQSPSSLSASVGDRVTITCQASQSLSNYLNWYQQKPGKIPKLLIYGASSLQSG
IPSRFSGSGSGTDYTLTISSLQPEDFATYYCQQGYSNP
>V187RF-JYKQ01052443.1-igkv |(27506, 27821)|2.77459093887|(0.997,0.858,0.994)|-1
TSGDIVMTQTPLSLPVTLGEPASISCRSSQSLLHSDGYTYLDWYVQKPGQSPQLLIYLVS
NRASGVPDRFSGSGSGTDFTLKISRVEAEDVGVYYCMQGTQLP
>V188RF-JYKQ01052444.1-igkv |(11183, 11498)|2.54667557143|(0.990,0.761,0.985)|-1
YSGDIVMTQTPLSLPVIPGEPASISCRSSQSLLDSDGYTCLDWYLQKPGQSPQLLIYEVS
NRASGVPDRFSGSGSGTDFTLKISRVEAEDVGVYYCMQSIEFP
>V189RF-JYKQ01052444.1-igkv |(23082, 23397)|2.60700696111|(0.936,0.855,0.863)|-1
SSGDIVMTQTPLSLPVIPGEPASISCRSSQSLLRSDGYTYLHWYLQKPGQSPQLLIYLGS
NCASGVPDRFSGSGSGTDFTLKISRVEAEDIGIYYRMQNLQIP
>V190RF-JYKQ01052444.1-igkv |(27757, 28057)|2.99599600001|(0.999,0.998,0.999)|-1
ARCDIQMTQSPSSLSASVGDRVTITCRASQGINKELAWYQQKPGKAPMLLLYSGSSLHTG
VPSQFSGSGSGTDFTLTISSLQPEDVATYYCRQDYTTP
>V191RF-JYKQ01052444.1-igkv |(35903, 36218)|2.77116921837|(0.998,0.860,0.987)|-1
SSGDIVMTQTPLSLPVTPGQPASISCRSSQSLLHSDGYTYLHWYLQKPGQSPRLLIYLVS
NRASGVPDRFSGSGSGTDFTLKISRVETEDVGVYYCMQTLQTP
>V192RF-JYKQ01052444.1-igkv |(45830, 46130)|2.99385601037|(1.000,0.994,1.000)|-1
ARCDIQMTQSPSSLSASVGDRVTITCRASQGIGNYLAWYQQKPGETPKLLIYAASSLQSG
IPSRFSGSGSGTDYTLTISSLQPEDFATYYCQQGYSNP
>V193RF-JYKQ01052444.1-igkv |(60842, 61157)|2.72998046744|(0.988,0.864,0.945)|-1
TNGDIVMTQTPLSLPVTPGEPASISCRSSQSLLHSDGKTYLHWYLQKPGQSPQLLIYLVS
NRASGVPDRFSGSGSGTDFTLKISRVEVEDVGVYYCEQGTQLP
>V194RF-JYKQ01052450.1-igkv |(9881, 10181)|2.99593600205|(1.000,0.996,1.000)|-1
ARCDIQMTQSPSSLSASVGDRVTITCRASQSINKELDWYQQKPGKAPTLLIYAASSLQTG
VSSRFSGSGSGTDFTLTISSLQPEDVATYYCQQDYTTP
>V195RF-JYKQ01052451.1-igkv |(138372, 138687)|2.62181211064|(1.000,0.793,0.987)|-1
SRGDIVMTQTPLSLPVTPGEPASISCRSSQSLLHSNGYTYLHWYLQKPGQSPQLLIYLGS
NRASGVPDRFSGSGSGTDFTLKISRVEAEDVGVYYCEQTLQTP
>V196RF-JYKQ01056010.1-ighv |(10615, 10921)|3.0|(1.000,1.000,1.000)|-1
VQCEVQLVESGGGLVQPGGSLRLSCAASGFTFSSYAMQWVHQAPGKGLEWVSAIGPGGDT
YYADAVKGRFTISRDNAKNSLYLQMNSLRAEDTAVYYCAR
>V197RF-JYKQ01056018.1-ighv |(1836, 2148)|2.63084854301|(0.859,0.868,0.918)|-1
VLSQVKLQQWGEGLVKPSETLSLTCAIYGGSISGYYYWSWIRQPPGKGLEWIGNIYGGGG
STNYNPSLKNRVTISKDTSKNQFSLKLSSVTAADTAVYYCAR
>V198RF-JYKQ01062878.1-ighv |(882, 1191)|3.0|(1.000,1.000,1.000)|-1
VQCEVQLVESGGGLVKPGASLRLSCAASGFTFSSYGMHWVRQAPGKGLEWVSYISSDSSY
IYYADSVKGRFTISRDNAKNSLSLQMNSLKTEDTAVYYCAR
>V199RF-JYKQ01062881.1-ighv |(1585, 1894)|2.991900005|(0.999,0.999,0.994)|-1
AHSQVQLVQSGAEVKKPGSSVKVSCKASGYTFTDYYMQWVRQAPGQGLEWMRWINPYNGN
TKYAQKFQGRVTMTRDTSTSTAYMELSSLRSEDTAVYYCAT
>V200RF-JYKQ01062881.1-ighv |(4488, 4803)|2.97463883425|(0.979,1.000,0.999)|-1
VQCEVQLVESGGGLVQPGGSLRLSCAASGFTFSNHCMSWVRQAPGKGLEWVGFIRNKAKG
GTAEYAASVKGRFTISRDDSKSIAILQMNSLKTEDTAMYYCTR
>V201RF-JYKQ01062939.1-trav |(3077, 3367)|2.00864098201|(0.844,0.577,0.836)|-1
TIIDAKTTQPTSMDCAEGRAANLPCNHSAISANEYIHWYRQIHSQGPQYVIHGLKDNETN
AMASLIITEDRKSSTLILPHATLRDTAVYYCILRV
>V202RF-JYKQ01066660.1-trav |(3004, 3294)|2.13492007723|(0.883,0.610,0.901)|-1
TIIDAKTTQPTSMDCAEGRAANLPCNHSTIGGNEYIHWYRQIHSQGPQYVIHGLKNNETN
AMASLIITEDRKSSTLILPHATLRDTAVYYCIVRV
>V203RF-JYKQ01066663.1-trav |(1183, 1482)|2.02176730703|(0.889,0.555,0.955)|-1
VNGQQIMQIPQYQHVQEGEDFTTHCNFSTTLSNIQWYKQRPGGHPVFLITLVKSREVKKQ
KRLTFKSGEAKKNSSLHITATQTTDVGTYFCAGHSAPQ
>V204RF-JYKQ01066669.1-trav |(750, 1050)|2.44251226488|(0.894,0.795,0.816)|-1
SSVAQKVTQAQSSVSMPVGKAVTLNCQYETSWWSYDLFWYKQPPSKEMIFLIRQGYSEQN
ARNGRYSVNFQKAASSIALTISALQLEDSATYFCALRE
>V205RF-JYKQ01075081.1-igkv |(781, 1078)|2.04416485805|(0.660,0.903,0.697)|-1
TTGETVLMQSPATLSLSPGERATLSCRASQSVSNRLAWYQQKPGQAPRLLIYGASSRATG
IPDRFSGSRSGTEFSLTISSLEPEDFAVYFCLQRVTG
>V206RF-JYKQ01075085.1-igkv |(254, 554)|2.99798400013|(1.000,0.998,1.000)|-1
ARCDIQMSQSPPSLSASVGDRVTITCQACQGISNYLAWYQQKPGKAPKLLIYAASTLQSG
VPSRFSGSGSGTEFTLTISSLQPEDFATYYCQQRNSYP
>V207RF-JYKQ01076935.1-igkv |(39827, 40127)|3.0|(1.000,1.000,1.000)|-1
ARCDIQMTQSPSSLSASVGDTVTITCQASQGISDYLAWYQQKPGKAPKLLIYAASNLESG
VPSRFSGSGSGTEFTLTISSLQPEDFATYYCQQYDSDP
>V208RF-JYKQ01076937.1-igkv |(20686, 20986)|2.9898400105|(0.994,0.996,1.000)|-1
ARCDIQMSQSPSSLSASVGDRVTITCRASQGISNALAWFQQKPGKAPKLLIYAASSLQSG
VPSRFSGSGSGTDYTLTISSLQPEDFATYYCQQGYSTP
>V209RF-JYKQ01076937.1-igkv |(32283, 32583)|3.0|(1.000,1.000,1.000)|-1
ARCDIQMTQSPSSLSASVGDRVTITCRASQGISSYLNWYQQKPGKAPKLLIYYATSLESG
VPSRFSGSGSGTEFILTISSLQPEDFATYYCQQHNSYP
>V210RF-JYKQ01076937.1-igkv |(51727, 52015)|2.96464165191|(0.999,0.970,0.999)|-1
IVMTQSPATLSLSLGETATISCRTSQSVGRKLAWYQQKPGQAPRLLIYGASSRATGIPDR
FSGSGSGTDFTLTISSLEPEDFAVYYCQETSNLS
>V211RF-JYKQ01080923.1-iglv |(36388, 36700)|3.0|(1.000,1.000,1.000)|-1
SWAEVVFTQPHSVSGSPGQTVTISCTRSSGSIDSKYVQWYQQRPGSAPTTVIYEDNKRPS
GVPDRFSGSIDSSSNSASLTISGLKSEDEADYYCQSADGSYT
>V212RF-JYKQ01081225.1-igkv |(3273, 3573)|2.99899200002|(0.999,1.000,1.000)|-1
ARCDIQMTQSPSSLSASVGDKVTITCQASQSISSWLTWYQQKPGKAPKLLIYKASTLQSG
VPSRFSGSGSGTEFTLTISSLQPEDFATYYCQQFSSAP
>V213RF-JYKQ01098165.1-iglv |(3777, 4077)|1.98909548917|(0.995,0.866,0.621)|-1
QSVLTQPPSVSGALGQRVTISCSGSGSNIGSNDVYWYQQFPGTAPKLLIYDNNQRPSGVP
DRFSGSKSGTSASLAISGLQPGDEADYYCAAWNDSLSG
>V214RF-JYKQ01098166.1-iglv |(974, 1284)|2.14494431407|(0.986,0.855,0.681)|-1
SLSQPMLTQPASLSASPGASASLTCTFSGGINVAGYYIYWYQQKPGSPPRYLLKYKSDSD
KHQGSGVPSRFSGSKDASANTGILRISGLQSEDEADYYCAI
>V215RF-JYKQ01126545.1-iglv |(13640, 13950)|2.99698000014|(0.998,0.999,1.000)|-1
SWAQAALTQPPSVSGSPGQSVTISCTGTSSDIGGYNYVSWYQQHPGKAPKLMIYDVSKRP
SGVSDRFSGSKSGNTASLTISGLQAEDEADYYCSSYASSST
>V216RF-JYKQ01126545.1-iglv |(37360, 37652)|2.98097252412|(0.999,0.983,1.000)|-1
SYELTQPPSVSVSPGQTARITCSGDALPEKYAYWYQQKPGQSPVLIIYEDSKRPSGIPER
FSGSSSGTVATLTISGAQVEDEADYYCYSADSSGN
>V217RF-JYKQ01126545.1-iglv |(44839, 45135)|2.05137864375|(0.895,0.567,0.952)|-1
SVASYELTQPLSVSVALGQMARITCGGNNIGRKYVYWYQQKPDQAPVLVIYEDSKRPSGI
PERFSGSNSGNMATLTIDGAQARDEADYYCQVWDSST
>V218RF-JYKQ01126545.1-iglv |(48188, 48491)|3.0|(1.000,1.000,1.000)|-1
SWAQAALTQPHSVSGSPGQSVTISCTGTSSDIGGYDRVSWYQQHPGKAPKLMIYEVSKRP
SGVSDRFSGSKSGNTASLTISGLQAEDEADYYCSSYAGS
>V219RF-JYKQ01126545.1-iglv |(71572, 71866)|2.97974002125|(0.997,0.993,0.990)|-1
QSALIQSPSVSGSLGQSVTISCTGTSSDIGRYNYVSWYQQQPGTTTKLMMYNVNTRPSGV
SDRFSGSKSGNTASLTISGLQAEDEADYYCSSYEAS
>V220RF-JYKQ01126546.1-iglv |(14999, 15296)|2.74248618871|(0.972,0.860,0.960)|-1
SVASYELTQPPSVSVSPGQTAKITCSGDVLAKYYAHWFQQKPGQAPVLVIYKDSERPSGI
PERFSSSSSGTTVTLTISGAQAEDEADYYCYSGDDNN
>V221RF-JYKQ01126546.1-iglv |(24524, 24827)|2.99593600205|(1.000,0.996,1.000)|-1
SWAQSALTQPPSVSGSPGQSVTISCTGTSSDVGGYSYVSWYQQHPGKAPKLMIYGVSNRP
SGVSDRFSGSKSGNTASLTISGLQAEDEADYYCCSYTTS
>V222RF-JYKQ01126546.1-iglv |(36976, 37279)|2.96335913276|(0.999,0.974,0.993)|-1
SAASYDLTQPPSVSVSPGQTARITCGGDNIESEAVHWYQQKPPQAPVLVIYADSERPSGI
PERFSGSKSGNTATLTISGVEAGDEADYYCQMWDSSSKH
>V223RF-JYKQ01126546.1-iglv |(44080, 44383)|1.81851536258|(0.980,0.727,0.665)|-1
SVVSSELTQESALSVALGQTVRITCQGDSLSSYYASWYQQKPGQVPVLVIYGNTNRPSGI
PGRFSGSWSGNTASLTITGAQVEDEADYYCGSWDNSGNH
>V224RF-JYKQ01126546.1-iglv |(60437, 60740)|2.99067605248|(1.000,0.991,1.000)|-1
SAASYDVTQPRSVSVSPGQTARITCGGDNIGSKYVQWYQQKPAQAPVLVIYDNSDRPSGI
PERFSGSNSGNTATLTISGVEAGDEADYYCQVWDSSSDH
>V225RF-JYKQ01126546.1-iglv |(71769, 72072)|2.98758408012|(1.000,0.998,0.990)|-1
SWAQAALTQPPSVSGSPGQSVTISCTGTSNDVGGYNYVSWYQQHPGKALKLMIYEVSKRP
TGVSDRFSGSKSGNTASLTISGLQAEDEADYYCGSYSGS
>V226RF-JYKQ01126546.1-iglv |(81293, 81598)|1.83984979817|(0.699,0.533,0.713)|-1
SVASYELTQPPLVSVSPGQTARISFSGDILKENYADWYQQKPGQAPVLVIYEDSKRPSGI
PERFSGSTSGDTTTLTISSTLSEDEADYSCFSGNENNPTV
>V227RF-JYKQ01126546.1-iglv |(89596, 89899)|2.70351211177|(0.998,0.852,0.946)|-1
SAASYDVTQPRSVSVSPGQTARITCGGDSIGSKVVNWYQQKPAQAPVLVIYADSVRPSGI
PERFSGSNSGNTATLTISGIEAGDEADYYCQVWDSSSDH
>V228RF-JYKQ01126546.1-iglv |(116413, 116723)|2.99298000014|(0.998,0.999,0.996)|-1
SWAQSALTQPPSVSGSPGQSVTISCTGTSSDVGGYNYVSWYQQHPGKAPKLMIYEVSKRP
SGVSDRFSGSKSGNTASLTISGLQAEDEADYYCSSYRSSNT
>V229RF-JYKQ01126579.1-iglv |(22005, 22315)|2.40930015418|(0.992,0.952,0.723)|-1
SLSQPVLTQPASLSASPGASASLTCTFSGGINVAGYYIHWYQQKPGSPPRYLLRYKSDSD
KHQGSGVPSRFSGSKDASANTGILRISGLQSEDEADYYCAI
>V230RF-JYKQ01126579.1-iglv |(26551, 26860)|2.56589057532|(0.948,0.823,0.876)|-1
SWAQSVLTQPRSASEAARKSVTISCSGSSSNIGSNYVSWYQQLPETAPKLLIYYDDLRAS
GVSDRFSGSKSGTSASLAISGLQTEDEADYYCAAWDDSLSG
>V231RF-JYKQ01126579.1-igkv |(50868, 51190)|1.7153492608|(0.841,0.633,0.603)|-1
SLSQSVLTQPPSFSTSGASASLTCTLRSDINVSRYRIYWYQQKPESPPRYLLSYYSDSYK
HQGSGVPSRFSGSKDASVNAGLLLISGLQPEDEADYYCKTGYGNA
>V232RF-JYKQ01126580.1-iglv |(2043, 2350)|2.99174403277|(1.000,1.000,0.992)|-1
SWAQSVLTQPPSVSGDPGQRVTISCTGSSSNIGGYDVYWYQQVPGTAPKLLIYDNNKRPS
GVSDRFSGSKSGTSASLTITGLQTEDEADYYCQSYDSSLS
>V233RF-JYKQ01126580.1-iglv |(7851, 8158)|2.98527613247|(0.989,0.999,0.998)|-1
SWAQSVLTQPPSVSGAPGQKVTISCTGSSSNIGGYNVYWYQLLPGTAPKLLIYDNNKRPS
GISDRFSGSKSGTSASLAITGLQSEDEADYYCQSYDSSLS
>V234RF-JYKQ01126581.1-iglv |(5729, 6039)|2.99067605248|(1.000,1.000,0.991)|-1
SLSQPVLTQPASLSASPGASARLTCTLSSGINVGSYSIYWYQQKPGSPPRYLLYYYSDSD
KHQGSGVPSRFSGSKDASANAGLLLISGLQSEDEADYYCAI
>V235RF-JYKQ01126581.1-iglv |(16324, 16633)|2.69997627355|(0.991,0.822,0.995)|-1
SWAQSVLTQPPSVSAAPGQRVTISCSGSSSNIGRGYVSWYQQLPGTAPKLLIYDNNKRPS
GISDRFSGSKSGNSASLTITGLQTGDEADYYCGAWDSSLSA
>V236RF-JYKQ01126581.1-iglv |(20501, 20808)|2.99899600001|(1.000,1.000,0.999)|-1
SWAQSVLTQPPSVSGAPGQRVTISCTGSSSNIGGYYVQWYQQLPGTAPKLLIYGNNKRPS
GVSDRFSGSQSGTSASLAITGLQSEDEADYYCEAWDNSLS
>V237RF-JYKQ01126585.1-iglv |(7447, 7757)|2.91697650973|(0.999,0.940,0.992)|-1
SLSQPVLTQPASLSASPGASVRLTCTLRSGISVGGYNIHWYQQKPGSPPRYLLYYYSDSN
KGQGSGVPSRFSGSKDASANAGILLISGFQSEDEADYYCTT
>V238RF-JYKQ01126585.1-iglv |(12290, 12599)|2.99798400013|(1.000,1.000,0.998)|-1
SWAQSVLTQPPSASGAPGQRVTISCSGSSSNIGSNYVSWYQQLSGKAPKLLIYKNNQRPS
GVPDRFSGSKSGNSASLAISGLQSEDEADYYCAAWDDSLSG
>V239RF-JYKQ01126586.1-iglv |(1288, 1598)|2.42204194905|(0.990,0.860,0.788)|-1
SLSQPMLTQPASLSASPGASASLTCTFSGGINVAGYYIHWYQQKPGSPPRYLLRYKSDSD
KHQGSGVPSRFSGSKDASANTGILRISGLQSEDEADYYCAI
>V240RF-JYKQ01126586.1-iglv |(6152, 6459)|2.67372403653|(0.857,0.984,0.904)|-1
SWAQSVLTQPPSASGAPGQSVTISCSGSSSNIRGNGVHWYQQLSGTAPKLLIYNNNQRPS
GVPDRFSGSKSGTSASLTITGLRSEDEAHYYCEAWDNSLS
>V241RF-JYKQ01126589.1-iglv |(2854, 3164)|2.9918400105|(1.000,0.994,0.998)|-1
SWAQSVLTQPPSVSGAPGQRVTISCTGSSSNIGAGYYVQWYQQLPGTAPKLLIYENNKRP
SGVTDRFSGSKSGTSASLTITGLQSEDEADYYCQSYDSSLS
>V242RF-JYKQ01126589.1-iglv |(33453, 33763)|2.82485531199|(0.996,0.896,0.974)|-1
SLSQPVLTQPTSLSASPGASARLTCTLRSGISVGSYRIYWYQQKPGSPRRYLLNYYSDSD
KHQGSGVPSRFSGSKDASANAGILLISGLQPEDEADYYCMI
>V243RF-JYKQ01126589.1-iglv |(38258, 38567)|2.99798400013|(1.000,0.998,1.000)|-1
SWAQSVLTQPPSASGAPGQRVTISCSGSSSNIGSNYVYWYQQFPGTAPKLLIYYSNQRPS
GVPDRFSGSKSGTSASLAITGLQSEDEADYYCAAWDNSLSG
>V244RF-JYKQ01135395.1-trdv |(125257, 125563)|1.85738028485|(0.636,0.652,0.582)|-1
RGMLCDKVTQSSPDQMVASGSEVVLLCTYDSTYSDPGLFWYRIRPDYNFQFVIYGDESRS
HGAYFAQGRFSVKHLLTQRAFHLVISPVRTEDSATYYCAM
>V245RF-JYKQ01187338.1-igkv |(11159, 11459)|2.5453184453|(0.815,0.999,0.870)|-1
TTGQVILTQSPATLSLSPGERATLSCRASQSVSSYLAWYQQKPGQAPRLLIHSVSSRATG
IPDRFSGSGSGTEFTLTISSLEPEDVGVYHCYQHSSGY
>V246RF-JYKQ01187347.1-igkv |(14093, 14411)|2.99083600705|(1.000,0.996,0.995)|-1
ACGDIVMTQSPDSLAVSLGERVTINCKSSQSLLYSSNNKNYLAWYQQKPGQAPKLLISWA
STRESGVPNRFSGSGSGTDFTLTISGLQAEDVAVYYCQQHYSSP
>V247RF-JYKQ01237599.1-ighv |(479, 788)|2.99899200002|(0.999,1.000,1.000)|-1
VQGEVQLVESGGGLSKPGGSLRLSCAASGFTFSDYNMHWVRQASGKGLEWVSGISNDGGS
TWYADSVKGRFTISRENAKNTLYLQMNSLRAEDTAVYYCAG
>V0RF-AACZ03015560.1-igkv |(51593, 51911)|2.55368388254|(0.969,0.759,0.989)|1
AYGDIVMTQSPDSLAVSLGGRATINCKSSQSILYSSNNKNYLAWYQQKPGQPPKLLIYWA
STRQSGVPDRFSGSGSGTDFTLTISSLQAEDVAVYYCQQHYSAP
>V1RF-AACZ03015560.1-igkv |(63266, 63554)|2.27758121945|(0.852,0.681,0.855)|1
TTLTQSPAFVSATPGDKVTISCKASQDIDDDMNWYQQKPGEAAIFIIQEATTLVSGIPPR
FSGSGYGTDFTLTINNIESEDAAYYFCLQDDNFP
>V2RF-AACZ03050973.1-trgv |(700, 1013)|2.87556288124|(1.000,0.985,0.918)|1
SQKSSNLEGRMKSVTRPTGSSAEITCDLIVINAVYIHWYLHQEGKSPQRLLYYDVSNSRD
VLESGLSLGKYYTHTPRRWSWILRLQNLIENDSGVYYCATWD
>V3RF-AACZ03050974.1-trav |(13446, 13755)|1.69991505964|(0.601,0.588,0.531)|1
RMKSVTRPTGSSAVITCDLPVENAGYTHWYLHQEGKAPQRLLYYDSYNSRVVLESGISQE
KYHTYASTGKSLKFILENLIERDSGVYYCATWDRHSDSDLC
>V4RF-AACZ03053974.1-trbv |(14398, 14698)|2.97820030738|(0.997,0.999,0.983)|1
LTEPEVTQTPSHQVTQMGQEVILRCVPISNHLYFYWYRQILGQKVEFLVSFYNNKISEKS
EIFDDQFSVERPDGSNFTLKIRSTKLEDSAMYFCASSE
>V5RF-AACZ03053974.1-trbv |(26630, 26943)|2.32497548775|(0.892,0.999,0.665)|1
PIDTEVTQTPKHLVMGMTNKKSLKCEQHMGHRAMYWYKQKAKKPPELMFVYSYKKLSINE
SVPSRFSPECPNSSLLNLHLHALQPEDLALYLCASSQDTALQ
>V6RF-AACZ03053974.1-trbv |(34490, 34786)|2.99294800078|(0.998,0.995,1.000)|1
PVEAGVTQTPRYLIKARGQQVTLSCSPISGHRSVSWYQQTPGQGLQFLFEYFSETQRNKG
NFPGRFSGRQFSNSRSEMNVSTLELGDSALYLCASSL
>V7RF-AACZ03053974.1-trbv |(41734, 42031)|2.99899600001|(1.000,1.000,0.999)|1
PVNAGVTQTPKFQVLKTGQSMTLQCAQDMNHNSMYWYRQDPGMGLRLIYYSVGEGTTDKG
EVPDGYNVSRLNKREFSLRLESAAPSQTSVYFCASSE
>V8RF-AACZ03053975.1-trbv |(1894, 2207)|2.93008808336|(1.000,1.000,0.943)|1
PMEMGVTQTPRHLVMGMTNKKSLKCEQHLGHNAMYWYKQSAKKPLELMFVYNFKEQTENN
SVPSRFSPECPNSSHLFLHLHALQPEDSALYLCASSQDTALQ
>V9RF-AACZ03053976.1-trbv |(3094, 3391)|2.99070402421|(0.993,0.998,1.000)|1
PVNAGVTQSPKFRVLKTGQSMTLQCAQDMNHNYMYWYQQDPGMGLRLIHYSAGEGTTAKG
EVPDGYNVSRLNTQNFLLRLESAAPSQTSVYFCATSE
>V10RF-AACZ03053977.1-trbv |(2980, 3277)|3.0|(1.000,1.000,1.000)|1
PLDTAVSQTPKYLVTQMGKKESLKCEQNLGHNAMYWYKQDSKKFLKTMFIYSNKEPILNE
TVPNRFSPDSPDKAHLNLHINSLELGDSAVYFCASSQ
>V11RF-AACZ03053977.1-trbv |(6432, 6729)|2.99799200002|(1.000,0.999,0.999)|1
PMEMGVTQTPRHLVMGMTNKKSLKCEQHLGHNAMYWYKQSAKKPLELMFVYSLEERVENN
SVPSRFSPECPNSSHLFLHLHTLQPEDSALYLCASSQ
>V12RF-AACZ03053977.1-trbv |(14911, 15208)|2.99696400065|(1.000,1.000,0.997)|1
PVNAGVTQTPKFRVLKTGQSMSLLCAQDMNHEYMYWYRQDPGMGLRLIHYSVGEGTTAEG
EVPDGYNVSRLKKQNFLLGLESAAPSQTSVYFCASSY
>V13RF-AACZ03053979.1-trbv |(398, 698)|2.99174403277|(1.000,1.000,0.992)|1
HTGAGVSQSPSNKVTEKGKDVELRCDPISGHTALYWYRQSLGQGLEFLIYFQGNSAPDKS
GLPSDRFSAERTGGSVSTLTIQRTQQEDSAVYLCASSL
>V14RF-AACZ03053981.1-trbv |(4476, 4773)|2.99699200002|(0.999,0.998,1.000)|1
PVIAGITQAPTSQILAAGRSMTLRCTQDMRHNAMYWYRQDLGLGLRLIHYSNTAGTTGKG
EVPDGYSVSRANTDDFPLTLASAVPSQTSVYFCASSD
>V15RF-AACZ03053981.1-trbv |(8075, 8375)|2.994900005|(1.000,1.000,0.995)|1
HTGAGVSQTPSNKVTEKGKDVELRCDPISGHAALYWYRQSLGQGPEFLIYFQGTGAADDS
GLPNDRFFAVRPEGSVSTLKIQRTEQGDSAVYLCASSL
>V16RF-AACZ03053981.1-trbv |(12907, 13203)|2.34946538755|(0.911,0.749,0.821)|1
PVEAGVTQSPTHLIKTRGQQVTLRCSPISGHSSVSWYQQALGQGHQFISRYANELRRSEG
NFPNRFSGRQFHDYCSEMNVSALELGDSALYLCARSL
>V17RF-AACZ03053981.1-trbv |(15649, 15945)|2.98967205249|(1.000,0.991,0.999)|1
PVDSGVTQTPKHLITATGQQVTLRCSPRSGDLSVYWYQQSLDQGLQFLIQYYNGEESAKG
NILERFSAQQFPDLHSELNLSSLELGDSALYFCASSV
>V18RF-AACZ03053981.1-trbv |(23626, 23923)|1.90068533721|(0.876,0.506,1.000)|1
HRDAEITQSPRHKITETGRQVTLACHQTWNHNNMFWYRQDLGHGLRLIHYSYGVQDTNKG
EVSDGYSVSRSNTEDFPLTLESAASSQTSVYFCASSE
>V19RF-AACZ03053981.1-trbv |(31375, 31675)|2.97720030738|(0.998,0.996,0.984)|1
LSEAEVAQSPRYKITEKSQAVAFWCDPISGHATLYWYRQILGQGPELLVQFQDESVVDDS
QLPKDRFSAERLKGVDSILKIQPAELGDSAMYLCASSL
>V20RF-AACZ03053981.1-trbv |(48721, 49018)|1.90661950725|(0.916,0.507,0.998)|1
HRDAGITQSPRHKITETGRQVTLMCHQTWSHSYMFWYRQDLGHGLRLIYYSAAADITDKG
EVPDGYVVSRSKTENFPLTLESATRSQTSVYFCASSE
>V21RF-AACZ03053983.1-trbv |(4545, 4845)|2.9307634587|(0.992,0.982,0.961)|1
LTEAGVAQSPRYKIIEKRQSVAFWCNPISGHATLYWYQQILGQGPKLLIQFQNNGVVDDS
QLPKDRFSAERLKGVDSTLKIQPAKLEDSAMYLCASSL
>V22RF-AACZ03053983.1-trbv |(21546, 21843)|2.97840127932|(1.000,1.000,0.980)|1
PVNAGVTQTPKFQVLKTGQSMTLQCAQDMNHKYMYWYRQDPGMGLRLIHYSVGAGITDKG
EVPNGYNVSRSNTEDFPLSLVSAAPSQTSVYFCASSY
>V23RF-AACZ03053983.1-trbv |(25762, 26062)|2.99899600001|(1.000,0.999,1.000)|1
HTGAGVSQSPRYKVAKRGRDVALRCDSISGHVTLYWYRQTLGQGSEVLTYFRSDAQRDKS
GRPSGRFSAERPERSVSTLKIQRTEQGDSAVYLCASSL
>V24RF-AACZ03053983.1-trbv |(33686, 33982)|2.99899600001|(1.000,1.000,0.999)|1
PVDAGVTQSPTHLIKTRGQQVTLRCSPQSGHNTVSWYQQALGQGPQFIFQYYREEENGRG
NFSPRFSGRQFPNYSSELNVNALELDDSALYLCASSL
>V25RF-AACZ03053983.1-trbv |(40132, 40429)|2.98483600705|(0.998,0.993,0.994)|1
PVNAGVTQTPKFRILKIGQSMTLQCAQDMNHNYMYWYRQDPGMGLKLIYYSVGAGITDKG
EVPNGYNVSRSTTEDFPLRLESAAPSLTSVYFCASSY
>V26RF-AACZ03053984.1-trbv |(12230, 12526)|2.98980401921|(0.999,0.999,0.992)|1
PVDAGVTQSPTHLIKTRGQQVTLRCSPISGHTSVSWYQQALGQGPQFIFQYYEKEERGRG
NFPDRFSACQFPNYSSELNVNALLLGDSALYLCASSL
>V27RF-AACZ03053986.1-trbv |(8, 308)|2.99899200002|(0.999,1.000,1.000)|1
HTGAGVSQSPRYKVTKRGQDVTLRCDPISGHVALYWYRQALGQGPEFLTYFNYEAQPDKS
GLPNDRFSAERPEGSNSTLTIQRTEQRDSAMYLCASSL
>V28RF-AACZ03053987.1-trbv |(5059, 5356)|2.89911529989|(0.997,0.965,0.950)|1
PMNAGVTQTPKFHILKTGQSMTLQCAQDMNHGYMSWYRQDPGMGLRLIYYSAAAGTTDKG
EVPNGYNVSRLNTEDFPLRLVSAAPSQTSVYFCASSY
>V29RF-AACZ03053988.1-trbv |(2703, 3003)|2.99088400513|(0.998,1.000,0.993)|1
HTGAGVSQSPRYKVTKRGQDVTLRCDPISSHATLYWYQQALGQGPEFLTYFNYEAQPDKS
GLPNDRFSAERPEGSNSTQTIQRTEQRDSAMYLCASSL
>V30RF-AACZ03053988.1-trbv |(11127, 11423)|2.99798400013|(1.000,0.998,1.000)|1
PVDAGVTQSPTHLIKTRGQHVTLRCSPISGHTSVSWYQQALGQGPQFIFEYYEKEERGRG
NFPDRFSARQFPNYSSELNVNALLLGDSALYLCASSL
>V31RF-AACZ03053988.1-trbv |(18445, 18742)|2.9958720041|(0.996,1.000,1.000)|1
PVNAVVTQTPKFQVLKTGQSMTLQCAQDMNHDCMSWYRQDPGMGLRRIHYSVAAGITDKG
EVPDGYNVSRSNKEDLPLRLESAAPSQTSVYFCASSY
>V32RF-AACZ03053988.1-trbv |(23071, 23371)|2.99599200002|(0.998,0.999,0.999)|1
HTGAGVSQSPRYKVTKRGQDVALRCDPISGHVSLFWYQQALGQGPEFLTYFRNEAQLDKS
GLPSDRFFAERPEGSVSTLKIQRTQQEDSAVYLCASSL
>V33RF-AACZ03053988.1-trbv |(31286, 31582)|2.99298000014|(0.998,0.996,0.999)|1
PVEAGVTQSPTHLIKTRGQQVTLRCSPISGHTSVYWYQQALGLGLQFLLWYDEGEERNRG
NFPRRFSGRQFPNYSSELNVNALELEDSALYLCASSL
>V34RF-AACZ03053988.1-trbv |(40506, 40806)|2.97120155558|(0.997,0.976,1.000)|1
HADTGVSQDPSHKITKRGQNVTFRCDPISEHNRLYWYRQTLGQCPEFLTYFQNEAQLEKS
RLLSDRFSAERPKGSFSTLEIQHTEQGDSAIYLCASSL
>V35RF-AACZ03053988.1-trbv |(47037, 47334)|2.99288400513|(1.000,0.995,0.998)|1
SVAAGVIQSPRYLIKEKRETATLKCYPIPRHDTVYWYQQGPGQDPQFLISFYEKMQSDKG
SIPDRFSAQQFSDYHSELNMSSLELGDSALYFCASSS
>V36RF-AACZ03053988.1-trbv |(55269, 55566)|2.9602624826|(1.000,0.994,0.970)|1
HMDAGITQSPRHKVTETGTPVTLRCHQTENHRYMYWYRQDPGHGLRLIHYSYDVKDTDKG
EVSDGYSVSRSKTEDFLLTLESTTSSQTSVYFCAISE
>V37RF-AACZ03053989.1-trbv |(6507, 6807)|2.45325717519|(0.957,0.714,1.000)|1
LIEAGVVQSPRYKIIEKKQPVAFWCNPISGHNTLYWYWQNLGQGPELLIRYENEEAVDDS
QLPKDRFSAERLKGVDSTLKIQPAELGDSAVYLCASSL
>V38RF-AACZ03053989.1-trbv |(12103, 12403)|3.0|(1.000,1.000,1.000)|1
HTDAGVIQSPRHEVTEMGQEVTLRCKPISGHNSLFWYRQTMMQGLELLIYFNNNVPIDDS
GMPKDRFSAKMPNASFSTLKIQPSEPRDSAVYFCASSL
>V39RF-AACZ03053991.1-trbv |(6886, 7186)|2.36555753229|(0.880,0.954,0.689)|1
LIDAGVTQTPRHKVTEMGQEVTMRCQPILGHNTVFWYRQTMMQGLELLAYFRNRAPLDDS
GMPKDRFSAEMLDATLATLKIQPSEPRDSAVYFCASGL
>V40RF-AACZ03053991.1-trbv |(13707, 14007)|2.94429455551|(0.997,0.956,0.998)|1
HIEAGVTQFPSHSVIEKGQTVTLRCDPVSGHDNLYWYRRVMGNEIKFLLHFVKESKQDES
GMPNNRFLAERTGGTYSTLKVQPAELEDSGVYFCASSQ
>V41RF-AACZ03053991.1-trbv |(18826, 19123)|2.96467205249|(0.985,0.986,0.994)|1
HGDAKVIQNPRYQVTQFEKPVTLGCSQNLNHNVMYWYQQKSSQAPKLLFHYYDKDFNNEA
DTPDNFQSRRPNTSFCFLDIRSPGLGDAAMYLCATSR
>V42RF-AACZ03053991.1-trbv |(23811, 24111)|2.99698000014|(0.998,0.999,1.000)|1
SPGEEVTQTPKHLVRGEGQKAKLYCAPIKGHSYVFWYQQVLKKEFKFLISFQNENVFDKT
GMPKERFSAKCLSNSPCSLEIQATKLEDSAVYFCASSQ
>V43RF-AACZ03053991.1-trbv |(41750, 42046)|2.30495800815|(0.966,0.668,0.970)|1
LSNAGVMQNPRHLVRRRGQEARLRCSPVKGHNHVYWYRQLPEEGLKFMVYLQKENIIDES
GMPKERFSAEFPKEGPSILRIQQAVRGDSAAYFCASS
>V44RF-AACZ03053991.1-trbv |(44878, 45175)|2.96074839429|(0.987,1.000,0.975)|1
TVDGGITQSPKYLFRKEGQNVTLNCEQNLNHDAMYWYRQDPGQGLRLIYYSQIVNDFQKG
DIAEGYSVSREKKESFPLTVTLAQKNPTAFYLCASSI
>V45RF-AACZ03053992.1-trbv |(7444, 7744)|2.47343041452|(0.929,0.831,0.808)|1
STDTKVTQRPRLLVKASEQKAKMDCVPIKGHSYVYWYRKKLEEELKFLIYFQNEELIQKA
EIINERFLAQCPKNSSCTLEIQSTESGDTALYFCASSK
>V46RF-AACZ03053992.1-trbv |(16518, 16818)|2.99498400013|(0.999,0.999,0.997)|1
SFHAKVTQTPGHLVKGKGQKTKMDCTPEKGHVFVYWYQQNQNKEFMLLISFQNEQVLQET
EMHKKRFSSQCPKNTPCSLAILSSEPGDTALYLCASSQ
>V47RF-AACZ03053992.1-trbv |(27256, 27554)|2.51754920221|(0.992,0.992,0.747)|1
SMDADVTQTPRNRITKTGKRIMLECSQTKGHDRMYWYRQDPGLGLRLIYYSFDVKDINKG
EISDGYSVSRQAQAKFSLSLESAIPNQTALYFCATSD
>V48RF-AACZ03053992.1-trbv |(41278, 41575)|2.99088400513|(0.998,0.993,1.000)|1
LMEADIYQTPRYLVIGTGKKIALECSQTMGHDKMYWYQQDPGMELHLIHYSYGVNSTEKG
DLSSESTVSRIRTEHFPLTLESARPSHTSQYLCASSE
>V49RF-AACZ03053994.1-trbv |(21067, 21364)|2.97461205453|(0.996,0.992,0.987)|1
PLEAQVTQNPRYLITVTGKKLTVTCSQNMNHDYMSWYRQDPGLGLRQIYYSVNVEVIDKG
DVPEGYNVSRKEKRNFPLILESPSPNQTSLYFCASSL
>V50RF-AACZ03053994.1-trbv |(26364, 26661)|2.99799200002|(1.000,0.999,0.999)|1
LVDVKVTQSSRYLVKRMGEKVFLECVQDMDHENMFWYRQDPGLGLRLIYFSYDVKMKEKG
DIPEGYSVSREKKERFSLILESASTNQTSMYLCASSL
>V51RF-AACZ03053995.1-trbv |(9498, 9801)|2.68613874128|(0.963,0.817,0.991)|1
SVFSAVISQKPSRDICQRGTSLTIQCQVNSQVTMMFWYRQQPGQSPTLIATANQGSEATY
ETGFVIDKFPISRPNLTFSTLTVSNMSPEDSSIYLCSVE
>V52RF-AACZ03066999.1-trbv |(221141, 221441)|2.41379134264|(0.901,0.794,0.802)|1
SMDTKVTQRPRLLVKANEQKAKTDCVPIKRHSYVYWYHKTLEEELKFLIYFQNEEIIQKA
EIINERFSAQCPQNSPCTLEIQSTESGDTAWYFCANSK
>V53RF-AACZ03066999.1-trbv |(230067, 230355)|1.56495241044|(0.567,0.520,0.503)|1
CFHAKVTQTPGYLVKGKGRKTKMYYTPENRHTFVCWYQQNQNKEFMFLISFQNEQVLQEM
EMHKKRFSSQCPKNPPCSLAILSSEPGDTALYLC
>V54RF-AACZ03067000.1-trbv |(17891, 18182)|2.99389600501|(1.000,0.995,0.999)|1
LMEAEIYQTPRHRVIGTGKKITLECSQTMGHDKMYWSRSRNGITPHPPFLWVNSTEKGDL
SSESTVSRIRIERFPLTLESASPSHTSQYLCASSE
>V55RF-AACZ03067007.1-trbv |(7737, 8040)|2.99699200002|(0.999,0.998,1.000)|1
SVFSAVISQKPSRDICQRGTSMTIQCQVDSQVTMMFWYCQQPGQSMTLIATANQGSEATY
ESRFVIDKFPISRPNLTFSTLTVSNRRPEDSSIYLCSVE
>V56RF-AACZ03070936.1-igkv |(7433, 7733)|3.0|(1.000,1.000,1.000)|1
ARCDIQMTQSPSSLSASVGGRVTITCRASQGISNNLNWYQQKPGKTPKLLIYAASSLQSG
IPSRFSDSGSGTDYTLTISSLQPEDFATYYCQQSDSTP
>V57RF-AACZ03095312.1-trav |(40528, 40815)|2.92603223422|(0.983,0.972,0.972)|1
VRSQQPVQSPQAVILREGEDAVINCSSSKALYSVHWYRQKHGEAPVFLMMLLKGGEQKGH
DKISASFNEKKQQSSLYLMASQLSYSGTYFCGAE
>V58RF-AACZ03095314.1-trav |(457, 747)|3.0|(1.000,1.000,1.000)|1
VSSEDKVVQSPLSLVVHEGDTVTLNCSYEVTNFQSLLWYKQEKKAPTFLFMLTSSGIEKK
SGRLSSILDKKELFSILNITATQTGDSAIYLCAVE
>V59RF-AACZ03095317.1-trdv |(27773, 28074)|2.90655350692|(0.998,0.991,0.934)|1
SGMAQTVTQSQPEMSVQEAETVTLSCTYDTSESNYYLFWYKQPPSRQMILVIRQEAYKQQ
NATENRFSVNFQKAAKSFSLKISDSQLGDTAMYFCAFM
>V60RF-AACZ03095317.1-trav |(36941, 37243)|3.0|(1.000,1.000,1.000)|1
FSMAQTVTQTQPEMSVQEAETVTLSCTYDTSESDYYLFWYKQPPSRQMILVIRQEAYKQQ
NATENRFSVNFQKAAKSFSLKISDSQLGDAAMYFCAYRS
>V61RF-AACZ03095319.1-trav |(17030, 17318)|2.99494800078|(1.000,0.997,0.998)|1
LSGELKVEQNPLFLSTQEGKNYTIYCNYSTTSDRLYWYRQDPGKSLESLFVLLSNGAVKQ
EGQLMASLDTKARLSTLHITAAVHDLSATYFCAV
>V62RF-AACZ03095319.1-trav |(33732, 34018)|1.82424215008|(0.607,0.570,0.667)|1
VSAARNEVEQSPQDLTAQEGELITINCSYSVGINALHWLQQHPGGGIVSLFMLSSGKKKH
GRLIATINIQEKHSSLHITASHPRDSAIYICAV
>V63RF-AACZ03097606.1-trav |(3590, 3899)|2.11661512343|(0.897,0.901,0.606)|1
TIMYLVIGTAGQSLEQPSEVTAVEGAIVQINCTYQTSGFYGLSWYQQHDGGAPTFLSYNA
LDGLEETGHFSSFLSRSDSYGYLLLQKLQMKDSASYFCAVR
>V64RF-AACZ03097611.1-trav |(13724, 14040)|2.47377584976|(0.972,0.751,0.934)|1
QSVAQPEDQVKVAEGNPLTVKCTYSVSGNPYLFWYVQYPNRGLQFLLKYITGDNLVKGSY
GFEAEFNKSQTSFHLKKPSALVSDSALYFCAVRDTLIGAAGGA
>V65RF-AACZ03097612.1-trav |(9441, 9731)|2.99899600001|(1.000,0.999,1.000)|1
MSRGEDVEQSLFLSVREGDSSVINCTYTDSSSTYLYWYKQEPGAGLQLLTYIFSNMDMKQ
DQRLTVLLNKKDKHLSLRIADTQTGDSAIYFCAES
>V66RF-AACZ03097613.1-trav |(2901, 3189)|3.0|(1.000,1.000,1.000)|1
VKSQKIEQNSEALNIQEGKTATLTCNYTNYSPAYLQWYRQDPGRGPVFLLLIRENEKEKR
KERLKVTFDTTLKQGVFHITASQPADSATYLCAL
>V67RF-AACZ03097613.1-trav |(17275, 17562)|2.99496000066|(0.999,0.996,1.000)|1
ANGENQVEHSPHFLGPQQGDVASMSCTYSVSRFNNLQWYRQNTGMGPKHLLSMYSAGYEK
QKGRLNATLLKNGSSLYITAVQPEDSATYFCAVD
>V68RF-AACZ03097613.1-trav |(45730, 46024)|3.0|(1.000,1.000,1.000)|1
GINGDSVVQTEGQVLLSEGDSLIVNCSYETTQYPSLLWYVQYPGEGPQLLLKAMKANDNG
RNKGFEATYRKETTSFHLEKDSVQESDSAVYFCALS
>V69RF-AACZ03097613.1-trav |(59820, 60113)|3.0|(1.000,1.000,1.000)|1
GSGKNQVEQSPQSLIILEGKNCTLQCNYTVSPFNNLRWYKQDTGRGPVSLTIMTFSENTK
SNGRYTATLDADTKQSSLHITASQLSDSASYICVVS
>V70RF-AACZ03097613.1-trav |(75553, 75841)|3.0|(1.000,1.000,1.000)|1
VWSQRKEVEQDPGPFNVPEGATVAFNCTYSNSASQSFFWYRQDCRKEPKLLMSVYSSGNE
DGRFTAQLNRASQYISLLIRDSKLSDSATYLCAV
>V71RF-AACZ03097613.1-trav |(86767, 87064)|2.99389600501|(1.000,0.995,0.999)|1
TVRAQSVTQPDIHITVSEGASLELRCNYSYGATPSLFWYVQSPGQGLQLLLKYFSGDTLV
QGIKGFEAEFKRSQSSFNLRKPSVHWSDAAEYFCAVG
>V72RF-AACZ03097614.1-trav |(12294, 12584)|2.99296000066|(0.999,0.998,0.996)|1
VNGENVEQHPSTLSVQEGDGAVIKCTYSDSASNYFPWYKQELGKGPQLIIDIHSNMGEKK
DQRIAVTLNKTAKHFSLHITETQPEDSAVYFCAAS
>V73RF-AACZ03097614.1-trav |(31772, 32063)|2.98798000014|(0.997,0.996,0.995)|1
VWSQQKEVEQNSGPLSVPEGAIVSLNCTYSDRRSQSFFWYRQYSGKSPELIMSIYSNGDE
EDGKFTAQLNKASQYVSLLIRDSQPSDSATYLCAV
>V74RF-AACZ03097614.1-trav |(38270, 38567)|3.0|(1.000,1.000,1.000)|1
GTRAQSATQLDSHVSVSEGALVLLRCNYSSSVPPYLFWYVQYPNQGLQLLLKYTTGATLV
KGINGFEAEFKKSETSFHLTKPSAHVNDAAEYFCAVS
>V75RF-AACZ03097617.1-trav |(9971, 10264)|1.99305752832|(0.992,0.996,0.549)|1
VSRGESVGLHLPTLSVQEGDNSIINCAYSNSASDYFIWYKQESGKGPQFIIDIRSNMDKR
QGQRVTVLLNKTVKHLSLQIAATQLGDSAVYFCAEN
>V76RF-AACZ03097618.1-trav |(4827, 5130)|3.0|(1.000,1.000,1.000)|1
PGIAQKITQTQPGMFVQEKEAVTLDCTYDTSDQSYGLFWYKQPSSGEMIFLIYQGSYDQQ
NATEGRYSLNFQKARKSANLVISASQLGDSAMYFCAMKE
>V77RF-AACZ03097618.1-trav |(21644, 21938)|3.0|(1.000,1.000,1.000)|1
RTRGDSVTQMEGPVTLSEEAFLTINCTYTATGYPSLFWYVQYPGEGLQLLLKATKADDKG
SNKGFEATYRKETTSFHLEKDSVQASDSAVYFCALS
>V78RF-AACZ03097619.1-trav |(24003, 24296)|3.0|(1.000,1.000,1.000)|1
VWSQQKEVEQDPGPLSVPEGAIASLNCTYSNSAFQYFMWYRQYSRKGPELLMYTYSSDNK
EDGRFTAQVDKSSKYISLFIRDSQPSDSATYLCAMS
>V79RF-AACZ03097619.1-trav |(37053, 37344)|1.57392348702|(0.939,0.658,0.606)|1
GTRAQSVTQLDSQVFEEAPVELRCNYSSSVSVYLFWYVQYPNQGLQLLLKYLSGSTLVKG
INGFEAEFKKSETSFHLRKPSVHISDAAEYFCAVS
>V80RF-AACZ03097619.1-trav |(56042, 56329)|2.99899200002|(0.999,1.000,1.000)|1
VNSQQGEEDPQALSIQEGENAIMNCSYKTSINNLQWYRQNSGRGLVHLILIRSNEREKHS
GRLRVTLDTSKKSSSLLITASRAADTASYFCATD
>V81RF-AACZ03097619.1-trdv |(66115, 66418)|3.0|(1.000,1.000,1.000)|1
SSMAQKVTQAQTEISVVEKEDVTLDCVYETRDTTYYLFWYKQPPSGELVFLIRRNSFDEQ
NEISGRYSWNFQKSTSSFNFTITASQVVDSAVYFCALSE
>V82RF-AACZ03097619.1-trav |(99749, 100036)|2.98742416586|(1.000,1.000,0.988)|1
LSGEDQVTQSPEALRLQEGESSSLNCSYTVSGLRGLFWYRQDPGKGPEFLFALYSAGEEK
EKERLKATLTKKESFLHITAPKPEDSATYLCAVQ
>V83RF-AACZ03097619.1-trav |(111650, 111949)|2.14776077907|(0.879,0.598,0.988)|1
VSSKQEVTQIPAALSVPEGDNLVLNCSFTDSAIYNLQWFRQDPGKGLTSLLLIQSSQREQ
TSGRLNASLDKSSGRSTLYIAASQPGDSATYLCAVRHS
>V84RF-AACZ03097621.1-trav |(4277, 4574)|1.84960334351|(0.714,0.533,0.726)|1
VRGIQVEQSPPDLILQEGANSTLRCNFSASVNNLQWFHQNPWGQLINLFYIPSGTKQNGR
LSATTVATERYSLLYISSSQTTDSGVYFCAVEPQCSP
>V85RF-AACZ03097622.1-trdv |(8097, 8397)|2.9451025444|(0.995,0.972,0.981)|1
SSVAQKVTQAQSSVSMPVRKAVTLNCLYEASWWSYYIFWYKQLPSKEMVFLIRQGSGEQN
AKSGRYSVNFKKAAKSVALTISALQLEDSAKYFCAFWE
>V86RF-AACZ03097622.1-trav |(17372, 17662)|2.22615921514|(0.981,0.642,0.972)|1
VSSILNVEQSPQSLHVQEGDSTNFTCSFTSSNFYALHWYRWETAKSPEALFVMTLNGDEK
KKGRISATLNTKEGYSYLYIKGSQPEDSATYLCAF
>V87RF-AACZ03097624.1-trav |(2805, 3104)|2.24986913738|(0.982,0.949,0.661)|1
VNGQQVMQIPQYQHVQEGEDFTTYCNSSTTLSNIQWYKQRPGGHPVFLIQLVKSGEVKKQ
KRLTFQFGEAKKNSSLHITATQTTDVGTYFCAGHSAPQ
>V88RF-AACZ03097624.1-trav |(14019, 14309)|2.24564394251|(0.912,0.634,0.989)|1
TIIDAKTTQPTSMDCAEGRAANLPCNHSTISGNEYIHWYRQIHSQGPQYIIHGLKNNETN
EMASLIITEDRKSSTLILPHATLRDTAVYYCIVRV
>V89RF-AACZ03097899.1-ighv |(18928, 19237)|2.99499200002|(0.999,0.998,0.998)|1
TYSQVQLVQSGHEVKQPGASVKVSCKASGYSFTTYGMNWVRQAPGQGLEWMGWFNTYTGN
PTYAQGFTGRFVFSMDTSVSTAYLQISSLKAEDTAMYYCAR
>V90RF-AACZ03097899.1-ighv |(75199, 75508)|3.0|(1.000,1.000,1.000)|1
VQCEVQLLESGGGLVQPGGSLRLSCAASGFTFSSYWMHWVRQAPGKGLEWVSRINSDGSS
TSYADSVKGRFTISRDNAKNTLYLQMNSLRAEDTAVYYCTR
>V91RF-AACZ03097899.1-ighv |(83090, 83405)|3.0|(1.000,1.000,1.000)|1
VQCEVQLVESGGGLVQPGGSLRLSCAASGFTFSGSAMHWVRQASGKGLEWVGRIRSKANS
YATAYAASVKGRFTISRDDSKNTAYLQMNSLKTEDTAVYYCAR
>V92RF-AACZ03097900.1-ighv |(7950, 8265)|2.99799600001|(0.999,1.000,0.999)|1
VQCEVQLLESGGGLVQPGGSLRLSCAASGFTFSDYYMDWVRQAPGKGLEWVGRIRNKANS
YTTEYAASVKGRFTISRDDSKNSLYLQRNSLKTEDTAVYYCTR
>V93RF-AACZ03097900.1-ighv |(23404, 23719)|2.99371202074|(0.994,1.000,1.000)|1
VQCEVQLVESRGGLVQPGGSLRLSCAVSGFTFSDYYMSWVRQAPGKGLEWVGFIRNKANG
GTTEYTTSVKGRFTISRDDSKSITYLQMNSLKTEDTAVYYCSR
>V94RF-AACZ03097900.1-ighv |(27981, 28295)|2.28507000185|(0.965,0.723,0.854)|1
VLSQVTLKESGPALVKPTETLTLTCTFSGFSLSTSGMRVSWIRQPPGKALEWLARIDWDD
DKYYSTSLKTRLTISKDTSKNQVVLTMTNMDPVDTATYYCARI
>V95RF-AACZ03097900.1-ighv |(37008, 37317)|2.66764483193|(0.988,0.968,0.820)|1
VQSQVQLVQSGAEVKKPGSSVKVSCKVSGGTFSSYAISWVRQAPGQGLEWMGVIIPILGT
ANYAQKFQGRVTITADESTSTAYMELSSLRSEDTAVYYCAT
>V96RF-AACZ03097900.1-ighv |(75733, 76039)|3.0|(1.000,1.000,1.000)|1
VQCEVQLVESGGGLVQPGGSLRLSCAASGFTFSSYHMSWVRQAPGKGLEWVSVIYSGGST
YYADSVKGRFTISRDNSKNTLYLQMNSLRAEDTAVYYCAR
>V97RF-AACZ03097900.1-ighv |(92730, 93036)|3.0|(1.000,1.000,1.000)|1
VQCEVQLVESGGGLVQPGGSLRLSCAASGFTFSSYAMHWVRQAPGKGLEWVSLIYSGDST
YYADSVKGRFTISRDNSKNTLYLQMGSLRAEDTAVYYCAR
>V98RF-AACZ03097904.1-ighv |(3428, 3734)|2.99899600001|(1.000,0.999,1.000)|1
VLSQLQLQESGPGLVKPSETLSLTCTVSGGSISSYYWSWIRQPPGKGLEWIGYIYYSGSA
YYNPSLKSRVTISVDTSKNQFSLKLSSVTAADTAVYYCAR
>V99RF-AACZ03097905.1-ighv |(2226, 2538)|2.8368427581|(0.983,0.892,0.995)|1
VLSQLQLQESGPGLVKPSQTLSLTCTVSGGSISSGSYYWSWIRQPAGKGLEWIGNIYYSG
STYYNPSLKSRVTISVDTSKNQFSLKLSSVTAADTAVYYCAR
>V100RF-AACZ03097906.1-ighv |(13610, 13916)|3.0|(1.000,1.000,1.000)|1
VQCEVQLVESGGGLVQPGGSLRLSCAASGFTVSSYHMSWVRQAPGKGLEWVSVIYSGGST
YYADSVKGRFTISRDNSKNTLYLQMNSLRAEDTAVYYCAR
>V101RF-AACZ03097906.1-ighv |(27525, 27832)|2.61199677071|(0.990,0.987,0.787)|1
VCAEVQLVQSGAEVKKPGESLKISCKGSGYSFTSYWIGWVRQMPGKGLEWMGIIYPGDSD
TRYSPSFQGQVTISADKSISTAYLQWSSLKASDTAMYYCA
>V102RF-AACZ03097906.1-ighv |(49257, 49572)|3.0|(1.000,1.000,1.000)|1
VQCEVQLVESGGGLVQPGRSLRLSCTASGFTFGDYAMSWIRQAPGKGLEWVGFIRSKAYG
GTTEYAASVKGRFTISRDDSKSIAYLQMNGLKTEDTAVYYCTR
>V103RF-AACZ03097906.1-ighv |(64529, 64835)|2.10172437926|(0.988,0.589,0.996)|1
VQCEDQLVESGGGLVQPGGSLRPSCAASGFAFSSYVLHWVRRAPGKGLEWVSAIGTGGDT
YYADSVMGRFTISRDNAKKSLYLQMNSLIAEDMAVYYCAR
>V104RF-AACZ03097906.1-ighv |(72260, 72569)|2.99899200002|(0.999,1.000,1.000)|1
AHSQVQLVQSGAEVKKPGASVKVSCKASGYTFTSYTISWLRQAPGQGLEWMGVISPSDGS
TSYAQKFQGRVTMTRDTSTSTVYMELSSLRSEDTAVYYCAR
>V105RF-AACZ03097906.1-ighv |(76385, 76694)|2.99899600001|(1.000,0.999,1.000)|1
AYSQMQLVQSGAEVKKPGSSVKVSCKASGYTFTYRYLHWVRQAPGQALEWMGWITPYNGN
TNYAQKFQDRVTITRDRSMSTAYMELRSLRSEDSAVYYCAR
>V106RF-AACZ03097910.1-ighv |(1033, 1344)|2.99593600205|(1.000,1.000,0.996)|1
VQCEVQLVESGGGVVQPGGSLRLSCAASGFTFDDYAMHWVRQAPGKGLEWVSLISWDGGS
TYYADSVKGRFTISRDNSKNSLYLQMNSLRAEDTALYYCAKD
>V107RF-AACZ03097912.1-ighv |(17400, 17707)|2.98028822908|(0.999,0.996,0.986)|1
VQCEVQLVESGGGLVQPESSLKLSCAASGFTFSSYAMNWVRQAPGKGLEWVAHIWNDGSQ
KYYADSVKGRFTISRDNSKSMLYLQMDSLKAEDTAMYYCT
>V108RF-AACZ03097916.1-ighv |(3845, 4154)|2.99698000014|(1.000,0.998,0.999)|1
VLSQVQLQESGPGLVKPSETLSLTCAVSGYSISSGYYWGWIRQPPGKGLEWIGSIYHSGS
TYYNPSLKSRVTISVDTSKNQFSLKLSSVTAADTAVYYCAR
>V109RF-AACZ03097919.1-ighv |(14915, 15224)|2.66580713845|(0.914,0.844,0.928)|1
VQCEVQLVESGGGLVQPGGSLRLSCAASGFTFSNSDTNWVHQAPGKGLELVSGVSWNGSR
MHYADSVKGRFIISRDNSRNSLYLQTNSLRAEDTAVYYCVR
>V110RF-AACZ03098145.1-ighv |(4162, 4471)|2.99371202074|(0.994,1.000,1.000)|1
VQCQVQLVESGGGVVQPGRSLRLSCAASGFTFSSYGMHWVRQAPGKGLEWVAFISYDGSN
KHYADSVRGRFTISRDNSKNTLYLQMNRLRAEDTAVYYCAR
>V111RF-AACZ03098146.1-ighv |(6178, 6490)|2.83534405623|(1.000,0.886,1.000)|1
VLSQVQLQESGPGLVKPSQTLSLTCAVSGGSITSGYYYWSWIRQPPGKGLEWIGGIYTSG
STYYNPSLKSRVTISVDTSKNQFSLKLSSVTAADTAVYYCAR
>V112RF-AACZ03098148.1-ighv |(5185, 5491)|1.84122913068|(0.864,0.771,0.556)|1
VLSQVQLQQWGAGLVKPSETLSLTCAVYGGSFSDYYWGWVRQPPGKGLEWIGHINYGGST
NYNPSLKSRVTISVDKSKNQFSLKLSSVTAADTAVYYCAR
>V113RF-AACZ03098176.1-ighv |(689, 998)|2.97374467291|(0.999,0.994,0.982)|1
VQCQVRLVESGGGVVQPGRSLRLSCAASGFTFSSYGMHWVRQAPGKGLEWVAFIQYDGSN
KYYADSVKGRFTISKDNSKNTLYLQMNSLRAEDTAVYYCAR
>V114RF-AACZ03102011.1-ighv |(12521, 12836)|2.59973593989|(0.968,0.999,0.775)|1
VQCEVQLVESGGGLVQPGGSLRLSCAASGFTFSDHYMSWVRQAQGKGLELVGLIRNKANS
YTTEYAASVKGRFTISREDLKNTLYLQMSSPKTEDLAVYYCAR
>V115RF-AACZ03102011.1-ighv |(35465, 35774)|2.34087112165|(0.889,0.859,0.713)|1
AQSRVQLVQSGAEVKKPGASVKVSCKASGYTFTSYCMHWVRQAHAQGLEWMGLVCPSDGS
TSHAQKFQGRVTITRDTSMSTAYMELSSLRSEDMAMYYCVR
>V116RF-AACZ03106490.1-ighv |(5495, 5804)|3.0|(1.000,1.000,1.000)|1
VQCEVQLVESGGGLVQPGGSLRLSCAASGFTFSSYWMHWVRQAPGKGLVWVSRINSDGSS
TSYADSLKGQFTISRDNAKNTLYLQMNSLRAEDMAVYYCTR
>V117RF-AACZ03107095.1-ighv |(2793, 3107)|2.60817252732|(0.932,0.830,0.893)|1
VLSQVTLKESGPALVKPTETLTLTCTLSGFSLSTSGMGMSWIRQPPGKALEWLAHIFSND
KKSYSTSLKNRLIISKDTSKSQVVLTMTNMDPVDTATYYCAWR
>V118RF-AACZ03126842.1-igkv |(17937, 18255)|2.37945765534|(0.983,0.690,0.998)|1
SSGDIVMTQTPLSLPVTPGEPASISCRSSESLLDTDDEHTYLNWYLQKPGQSPQLLIYEV
SNRASGVPDRFSGSGSGTDFTLKISRVEAEDVGVYYCMQALQTP
>V119RF-AACZ03126842.1-igkv |(27906, 28206)|2.99598000014|(0.999,1.000,0.997)|1
ARCDIQMTQSPSSLSASVGDRVTITCRASQGISNNLNWYQQKPGKTPKLLIYAASSLQSG
IPFRFSDSGSGTDYTLTISSLQPEDFATYYCQQSDSTP
>V120RF-AACZ03127129.1-iglv |(13910, 14207)|2.99696400065|(1.000,0.997,1.000)|1
SVASYELTQPSSVSVSPGQTARITCSGDVLAKNYARWFQQKPGQAPVLVIYKDSERPSGI
PERFSGSSSGTTVTLTISGAQVEDEADYYCYSAADNN
>V121RF-AACZ03127129.1-iglv |(32581, 32884)|3.0|(1.000,1.000,1.000)|1
SEASYELTQPPSVSVSPGQTARITCSGDALPKQYAYWYQQKPGQAPVLVIYKDSERPSGI
PERFSGSSSGTTVTLTISGVQAEDEADYYCQSADSSGTY
>V122RF-AACZ03127131.1-iglv |(7169, 7472)|2.99798400013|(1.000,1.000,0.998)|1
SVTSYELTQPPSVSVAPGQTARITCGGNNIGSKAVHWYQQKPGQAPVLVIYYDSDRPSGI
PERFSGSNSGNTATLTISRVEAGDEADYYCQVWDSSSKH
>V123RF-AACZ03127131.1-iglv |(15097, 15400)|3.0|(1.000,1.000,1.000)|1
SVVSSELTQDPAVSVALGQTVRITCQGDSLRSYYASWYQQKPGQAPVLVIYGNNNRPSGI
PDRFSGSSSGNTASLTITGAQAEDEADYYCSSLDSSGNH
>V124RF-AACZ03127135.1-iglv |(12358, 12661)|2.99288400513|(1.000,0.995,0.998)|1
SEASYELTQPPSVSVSLGQTARITCSGEALPKKYAYWYQQKPGQAPVLVIYKDSERPSGI
PERFSGSSSGTIVTLTISGVQAEDEADYYCQSADSSGTY
>V125RF-AACZ03127138.1-iglv |(6948, 7251)|2.05384353947|(0.898,0.983,0.563)|1
SATSYELTQPHSVSVATAQTARITCGGNNIGSKAVHWYQQKPGQDPVLVIYSNSNQPSGI
PERFSGSNPGNTATLTISRVEAGDEVDYYCQVWDSSSDH
>V126RF-AACZ03127139.1-iglv |(1837, 2140)|2.66582619759|(0.974,0.959,0.822)|1
SATSYELTQPHSVSVATAQMARITCGGNNIGSKAVHWYQQKPGQDPVLVIYSDSNRPSGI
PERFSGSNSGNTATLTISRVEAGDEVDYYCQVWDSSSDH
>V127RF-AACZ03127139.1-iglv |(22125, 22435)|2.94960484445|(0.988,0.993,0.970)|1
SWAQSALTQPPSVSRSPGQSVTISCTGTSSDVGGYNYVSWYQQHPGKAPKLMIYDVSKRP
SGVPDRFSGSKSGNTASLTISGLQAEDEADYYCCSYAGSYS
>V128RF-AACZ03127139.1-iglv |(41415, 41718)|3.0|(1.000,1.000,1.000)|1
SEASYELTQPPSVSVSPGQTARITCSGDALPKQYAYWYQQKSGQAPVLIIYEDSKRPSGI
PERFSGSSSGTMATLTISGAQVEDEADYYCYSTDSSGNH
>V129RF-AACZ03127139.1-iglv |(48899, 49191)|1.53249919239|(0.508,0.849,0.557)|1
SVASYELTQPLSVSVALGQTARITCGGNNIGSKNVHWYQQKPGQAPVLVIYRDSNRPSGI
PERFSGSNSGNTATLTISRAQAGDEAITVRCGTAA
>V130RF-AACZ03127139.1-iglv |(52418, 52728)|2.75272179272|(0.998,0.997,0.846)|1
SWAQSALTQPPSASGSPGQSVTISCTGTSSDIGGYNYVSWYQQHPGKAPKLMIYEVSKRP
SGVPDRFSGSKSGNTASLTVSRLQAEDEADYYCSSYAGSNN
>V131RF-AACZ03127142.1-iglv |(7297, 7595)|1.82375048211|(0.714,0.576,0.633)|1
LCALPVLTQPPSASASLGASVKLTCTLSSEHSTYTIEWYQQRPGRSPQYIMKVKSDGSHS
KGDGIPDRFMGSSSGADRYLTISNLQSDDEAEYHCGE
>V132RF-AACZ03127143.1-iglv |(3944, 4240)|2.99899600001|(1.000,0.999,1.000)|1
SVASYELTQPPSVSVSPGQTASITCSGDKLGDKYAYWYQQKSGQSPVLVIYQDSKRPSGI
PERFSGSNSGNTATLTISGTQAMDEADYYCQAWDSST
>V133RF-AACZ03151853.1-igkv |(10232, 10550)|2.37243766625|(0.989,0.695,0.981)|1
TSGDIVMTQTPLSLPVTPGEPASISCRSSQSLLDSDDGNTYLDWFLQKPEQSPQLLIYEV
SNWASGVPDRFSGSGSGTDFTLKISRVEAEDVGVYYCMQALQTP
>V134RF-AACZ03151853.1-igkv |(38017, 38335)|1.65546536478|(0.860,0.614,0.613)|1
SSEDIVMTQTPLSLPVTPGEQASISCRSCQSLLDSDDGNTYLDLYLQKPGQSPQLLIYTL
SYRASGVSDRFSGRGSGNDFTLKISRVEAEDVEVYYCMQHIEFP
>V135RF-AACZ03151853.1-igkv |(48491, 48784)|3.0|(1.000,1.000,1.000)|1
ARCDIQMTQSPSSLSASVGDRVTITCRASQSISNYLSWYQQKPGKAPKLLIYDASTLQSG
VPSRFSGSGSGTDFTLTISSLQPEDFATYYCQRGYG
>V136RF-AACZ03151853.1-igkv |(70778, 71078)|2.99067605248|(1.000,0.991,1.000)|1
ARCDIQLTQSPSSLSASVGDRVTITCQASQDISNYLNWYQQKPGKVPKLLIYSASNLQSG
VPSRFSGSGSGTDFTLTISSLQPEDVATYYCQRTYNAP
>V137RF-AACZ03151853.1-igkv |(99987, 100287)|2.89151845765|(0.965,1.000,0.935)|1
ARCDIQMTQSPSSLSASVGDRVTITCQASQDISNYLNWYQQKPGKAPKLLIYDASNLETG
VPSRFSGSGSGTDFTFTISSLQPEDIATYYYQQYDNLP
>V138RF-AACZ03151853.1-igkv |(122999, 123314)|2.59668458672|(0.970,0.880,0.842)|1
SSGDVVMTQSPLSLPVTLGQPASISCRSSQSLVYSDGNTYLSWIQQRPGQPPRLLIYKVS
NRDSGVPDRFSGSGAGTDFTLKISRVEAEDVGVYYCVQGIQLP
>V139RF-AACZ03151853.1-igkv |(133574, 133889)|2.99493200206|(1.000,0.999,0.996)|1
SSADIVMTQTPLSLSVTPGQPASISCKSSQSLLHSDGNTYLYWYLQKPGQSPQLLIYRVS
NRASGVPDRFSGSGSGTDFTLKISQVEAEDVGVYYCMQGIQLP
>V140RF-AACZ03151853.1-igkv |(146050, 146365)|2.98197252412|(1.000,0.984,0.999)|1
SSGDIVMTQSPLSLPVTPGEPASISCRSSQSLLHSNRYNYLDWYLQKPGQSPQLLIYLGS
NRASGVPDRFSGSGSGTDFTLKISRVEAEDVGVYYCMQALQTP
>V141RF-AACZ03151853.1-igkv |(154335, 154635)|2.99067605248|(1.000,0.991,1.000)|1
TRCDIQMTQSPSSLSASVGDRVTITCWASQGISNYLAWYQQKPGKVPKLLIYAASTLQSG
VPSRFSGSGSGTDFTLTISSLQPEDVATYYCQKYNSAP
>V142RF-AACZ03151853.1-igkv |(190625, 190927)|2.99799600001|(0.999,1.000,0.999)|1
SSGDIVMTQTPLSSPVTLGQPASISCRSSQSLVHSDGNTYLSWLQQRPGQPPRLLIYKVS
NRFSGVPDRFSGSGAGTDFTLKISRVEAEDVGVYYCTQA
>V143RF-AACZ03151853.1-igkv |(207246, 207544)|2.44371239815|(0.995,0.718,0.995)|1
SRGEIVLTQSPDFQSVPPKEKVTITCRASQSIGSSLHWYQQKPGQSPKLLIKYASQSISG
VPSRFSGSGSGTDFTLTINSLEAEDAATYYCQQSSSL
>V144RF-AACZ03151855.1-igkv |(12698, 12994)|2.99698000014|(1.000,0.998,0.999)|1
TTGEIVLTQSSATLSLSPGERATLSCRASQSVSSSYLAWYQQKPGQAPRLLIYDASSRAT
GIPDRFSGSGSGTDFTLTISRLEPEDFAVYYCQQYGS
>V145RF-AACZ03151855.1-igkv |(28194, 28494)|2.99899600001|(1.000,0.999,1.000)|1
ARCDIQMTQSPSSLSASVGDRVTITCRASQGISNYLAWFQQKPGKAPKRLIYAASSLQSG
VPSRFSGSGSGTEFTLTISSLQPEDFATYYCLQHNSYP
>V146RF-AACZ03151855.1-igkv |(45639, 45939)|2.99798400013|(1.000,0.998,1.000)|1
ARCDIQMTQSPSSLSASVGDRVTITCRASQGISSWLAWYQQKPGKAPKPLIYAASSLQSG
VPSRFSGSGSGTEFTLTISSLQPEDFATYYCQQYNSYP
>V147RF-AACZ03151855.1-igkv |(60285, 60585)|2.65716620566|(0.947,1.000,0.802)|1
TTGEIVLTQSPATLSLSPGERATLSCRASQSVSSYLAWYQQKPGQAPRLLIYGASNRATG
IPARFSGSGSRTDFTLTISSVEPEDFAVYYCQQYNNQP
>V148RF-AACZ03151857.1-igkv |(4301, 4601)|3.0|(1.000,1.000,1.000)|1
ARCAIQLTQSPSSLSASVGDRVTITCRASQGISNRLNWYQQKPGKAPKLLIYDASSLESG
VPSRFSGSGSGTDFTLTISSLQPEDFATYYCQQFNSYP
>V149RF-AACZ03151857.1-igkv |(10072, 10372)|2.98297652411|(1.000,1.000,0.984)|1
ASCDIQMTQSPSSVSASVGDRVTITCQASQGISSWLAWYQQKPGKAPKLLIYAASSLQSG
VPSRFSGNGSGTDFTLTISSLQPEDFATYYCQQANSFP
>V150RF-AACZ03151858.1-igkv |(2327, 2627)|2.99899600001|(1.000,1.000,0.999)|1
TTGEIVLTQSPATLSLSPGEKATLSCRASQSVSSYLAWYQQKPGQAPRLLIYDASNRATG
ISARFSGSGSGTDFTLTISSLEPEDFAVYYCQQRSNWH
>V151RF-AACZ03151858.1-igkv |(39404, 39704)|2.99174403277|(1.000,0.992,1.000)|1
ARCAIQMTQSPSSLSASVGDRVTITCRASQGISSYLAWYQQKPAKAPKLLIYYASSLQSG
VPSRFSGSGSGTEFTLTISSLQPEDFATYYCQQLNSYP
>V152RF-AACZ03151858.1-igkv |(56994, 57304)|1.91159026005|(0.976,0.929,0.543)|1
ARCAIRMTQSPSSLSASTGDRVTITCRASQGISSYLAWYQQKPGKAPKLLNYAASTLQSG
VPSRFSGSRSGTEFTLTISCLQSEDFATYYCQQYYSYPPTV
>V153RF-AACZ03151979.1-igkv |(10219, 10519)|2.99799600001|(0.999,1.000,0.999)|1
AKCDIQMTQSPSTLSASVGDRVTITCRASQGISSYLNWYQQKPGKAPKLLIYAASTLESG
VPSRFSGSGSGTEFTLTISSLQPDDFATYYCQQYSSTP
>V154RF-AACZ03171037.1-ighv |(18459, 18781)|2.20297612256|(0.774,0.650,0.913)|1
VLSQVTLKESGPVLVKPTETLTLTCTISGFSLSNAGMGVSWIRQPPGKALEWLAHIFWND
EKSYSTSLKSRLTISKDTSKSQVVLTMTNMDPVDTATYYCTRRAQ
>V155RF-AACZ03171037.1-ighv |(42750, 43059)|2.74120395011|(0.985,0.842,0.993)|1
THAQVQLVQSGAEVKKPGATVKISCKASGYTLTELSMHWVRQAPGKRLEWMGGFDPEDGE
TIYAQKFQGRVTMTEDTSTDTAYMELSSLRSEDTAVYYCAT
>V156RF-AACZ03171037.1-ighv |(52793, 53102)|2.99899200002|(0.999,1.000,1.000)|1
VQCEVQLVESGGGLVKPGGSLRLSCAASGFTFSSYAMHWVRQAPEKGLEWVSTISGSGGS
TWYPDSVKGRFTISRDNSKNTLYLQMNSLRAEDTAVYYCAR
>V157RF-AACZ03171037.1-ighv |(63661, 63976)|3.0|(1.000,1.000,1.000)|1
VQCEVQLVESGGGLVKPGGSLRLSCAASGFTFSSYSMNWVRQAPGKGLEWVGFIRTKAKG
GTTEYAASVKGRFTISRDDSKSIAYLQMNSLKTEDTAVYYCTR
>V158RF-AACZ03171037.1-ighv |(86377, 86686)|3.0|(1.000,1.000,1.000)|1
VQCEVQLVESGGGLVQPGGSLRLSCAASGFTFSSYGMHWVRQAPGKGLEWVSYISYDSSY
IYYADSVKGRFTISRDNAKNSLYLQMNSLRAEDTAVYYCAT
>V159RF-AACZ03171037.1-ighv |(116832, 117141)|2.994900005|(1.000,1.000,0.995)|1
VQCEVQLVESGGGLVQPGGSLRLSCAASGFTFDDYGMSWVRQAPGKGLEWVSLISWDGGS
TYYADSVKGRFTISRDNSKNSLYLQMSSLRAEDTALYYCAR
>V160RF-AACZ03171037.1-ighv |(129850, 130159)|2.99899600001|(1.000,1.000,0.999)|1
AHSQVQLVQSGAEVKKPGASVKVSCKASGYTFTSYDINWVRQATGQGLEWMGWMNPNSGN
TGYAQKFQGRVTMTRDTSISTAYMELSSLRSEDTAVYYCAR
>V161RF-AACZ03171037.1-ighv |(150598, 150907)|2.99598000014|(0.999,0.997,1.000)|1
VQCEVQLVESGGGLVQPGGSLTLSCAASGFTFSSYWMSWVRQAPGKGPEWVANIKKDGSE
KYYADSVKGRFTISRDNAKNSLYLQMNSLRAEDTAVYYCTR
>V162RF-AACZ03171037.1-ighv |(157231, 157541)|1.68062319314|(0.535,0.583,0.770)|1
WRKLDKAWVSLRLSCAASGFTFSSHSTHWVPQAPGKGLQWVSVISGSGSTIYYADSVKGR
FTISRDNTKNSLYLQMNRLRAEDAAAYYSVRDTVRRSQCEP
>V163RF-AACZ03171037.1-ighv |(174851, 175165)|1.69489642175|(0.900,0.765,0.527)|1
VLSQVTLKESGPTLVKPTQTLTLTCTFSGFSLSTSGVGVGWIRQPPGKALEWLALIYSDN
DKRYSPSLKSRLTITKDTSKNQVVLTMTNMDPVDTATYYCAHR
>V164RF-AACZ03171037.1-ighv |(187799, 188108)|2.99496000066|(0.999,1.000,0.996)|1
AHSQVQLVQSGSEVKKPGASVKVSCKASGYTFTSYAMNWVRQAPGQGLEWMGWINTNTGN
PTYAQGFTGRFVFSLDTSVSTAYLQISSLKAEDTAVYYCAR
>V165RF-AACZ03171037.1-ighv |(200692, 201001)|2.99699200002|(0.999,1.000,0.998)|1
VLSQVQLQESGPGLVKPSETLSLTCAVSGGSISSSNWWSWVRQPPGKGLEWIGEIYHSGS
PNYNPSLKSRVTISVDKSKNQFSLKLSSVTAADTAVYYCAR
>V166RF-AACZ03171395.1-trav |(594, 882)|3.0|(1.000,1.000,1.000)|1
VKSQKIEQNSEALNIQEGKTATLTCNYTNYSPAYLQWYRQDPGRGPVFLLLIRENEKEKR
KERLKVTFDTTLKQGVFHITASQPADSATYLCAL
>V167RF-AACZ03173011.1-ighv |(4916, 5238)|2.19702411625|(0.895,0.624,0.941)|1
VLSQVTLMESGPALVKPTETLTLTCTLSGFSLSTSGMGMSWIRQPPGKALEWLAHIFSND
KKSYSTSLKNRLIISKDTSKSQVVLTMTNMDPVDTATYYCAWRAQ
>V168RF-AACZ03176953.1-iglv |(7473, 7783)|1.83049109844|(0.813,0.576,0.696)|1
SLSQPVLTQPSSHSASSGASVRLTCTLSSGFSVGDFWIRWYQQKPGNPPRYLLYYHSDSN
KGQGSGVPSRFSGSNDASANAGILRVSGLQPEDEAYYYCGT
>V169RF-AACZ03176953.1-iglv |(11235, 11544)|2.58415056948|(0.997,0.773,0.996)|1
SWAQSVLTQPPSVSAAPGQKVTISCSGSSCNIGNNYVSWYQQLPGTAPKILIYDNNKRPS
GISDRFSGSKSGTSATLGITGLQTGDEADYYCGTWDSSLSA
>V170RF-AACZ03176953.1-iglv |(41685, 41995)|2.54331627949|(0.988,0.788,0.929)|1
SLSQPVLTQPTSLSASPGASARLTCTLRSGINLGSYRIYWYQQKPGSPPRYLLRYKSDSD
KQQGSGVPSRFSGSKDASTNAGILVISGLQSEDEADYYCMI
>V171RF-AACZ03176953.1-iglv |(46517, 46826)|3.0|(1.000,1.000,1.000)|1
SWAQSVLTQPPSASGTPGQRVTISCSGSSSNIGSNTVNWYQQLPGTAPKLLIYSNNQRPS
GVSDRFSGSKSGTSASLAISGLRSEDEADYYCAAWDDSLSG
>V172RF-AACZ03176965.1-iglv |(24589, 24892)|2.28862953201|(0.792,0.879,0.689)|1
SWAQSALTQPPFVSGAPGQSVTISCTGTSSDVGDYDHVFWYQKRLSTTSRLLIYNVNTRP
SGISDLFSGSKSGNMASLTISGLKSEVEANYHCSLYSSS
>V173RF-AACZ03176987.1-iglv |(5895, 6205)|2.99174403277|(1.000,0.992,1.000)|1
SWANFMLTQPHSVSESPGQTVTISCTRSSGSIASDYVQWYQQRPGSAPTTVIYEDNRRPS
GVPDRFSGSIGSSSNSASLTISGLKSEDEADYYCQSYDSSS
>V174RF-AACZ03179884.1-ighv |(12665, 12971)|2.99480001|(0.995,1.000,1.000)|1
VQCEVQLVQSGGGLVQPGGSLRLSCAGSGFTFSSYAMHWVRQAPGKGLEWVSAIGTGGGT
YYADSVKGRFTISRDNAKNSLYLQRNSLRAEDMAVYYCAR
>V175RF-AACZ03182257.1-ighv |(5938, 6245)|2.99696400065|(1.000,1.000,0.997)|1
AQCEVQLVESGGGLVQPGGSLRLSCAASGFTFSNHYTSWVLQAPGKGLEWVSYISGDRGY
TNYADSVKGRFTISRDNAKNSLYLQMNSLRAEDTAVYYCV
>V176RF-AACZ03015561.1-igkv |(2130, 2430)|2.97169465218|(0.999,1.000,0.975)|-1
AKCDIQMTQSPSTLSASVGDRVTITCRASQGISSWLAWYQQKPGKAPKLLIYKASSLESG
VPSRFSSSGSGTEFTLTISSLQPDDFATYYCQQYSSYP
>V177RF-AACZ03015561.1-igkv |(34244, 34556)|2.97942016586|(0.997,0.998,0.985)|-1
CNGDIVLTQSPASLAVSPGQRATITCRASESVSFLGINLIHWYQQKPGQPPKLLIYQASN
KDTGVPARFSGSGSGTDFTLTINLVEANDTANYYCLQSKNFP
>V178RF-AACZ03015562.1-igkv |(7056, 7356)|3.0|(1.000,1.000,1.000)|-1
TRCDIQMTQSPSSLSASVGDRVTITCRASQGISNYLAWYQQKPGKAPKLLIYYASRLESG
VPSRFSGSGSGTDYTLTISSLQPEDFATYYCQQYNSNP
>V179RF-AACZ03015562.1-igkv |(21131, 21434)|2.99593600205|(1.000,1.000,0.996)|-1
TIGEIVMTQSPATLSLSPGERATLSCRASQSVSSSYLSWYQQKPGQAPRLLIYGASTRAT
GIPARFSGSGSGTDFTLTISSLQPEDFAVYYCQQDYKLP
>V180RF-AACZ03015562.1-igkv |(33603, 33903)|2.99696400065|(1.000,0.997,1.000)|-1
ARCDIQMTQSPSSLSASVGDRVTITCRASQGIRNDLGWYQQKPGKAPKLLIYAASSLQSG
VPSRFSGSGSGTDFTLTISSLQPEDFATYYCLQDYNYS
>V181RF-AACZ03015564.1-igkv |(7726, 8026)|3.0|(1.000,1.000,1.000)|-1
TRCDIQMTQSPSSLSASVGDRVTITCRASQSISNSLAWYQQKPGKAPKLLIYAASRLESG
VPSRFSGSGSGTDYTLTISSLQPEDFATYYCQQYYSTP
>V182RF-AACZ03015754.1-igkv |(14686, 14986)|3.0|(1.000,1.000,1.000)|-1
ARCDIQVTQSPSSLSASVGDRVTITCRTSQGISNGLSWYQQKPGQAPTLLIYAASSLQSG
IPSRFSGSGSGTDFTLTISSLQPEDVATYYCLQDYTTP
>V183RF-AACZ03016034.1-igkv |(14230, 14530)|2.77445712047|(0.993,0.855,1.000)|-1
ARCDIPMTQSPSSLSASVGDRVTITCRASQGISNNLNWYQQKPGKTPKLLIYAASSLQSG
IPSRFSDSGSGTDYTLTISSLQPEDFAAYYCQQSDSTP
>V184RF-AACZ03016143.1-igkv |(754, 1054)|2.95805224805|(0.997,0.970,0.994)|-1
ARCAIQMTQPPSSLFASVGDSVTITCRASQSVTNHWYQQKPGKAPKLLIYRVSSLQMGVP
SRFSGSGSGTDFTLTISSLQPDDVATYYCQQEYTVGVT
>V185RF-AACZ03054006.1-trbv |(3325, 3619)|2.20696252847|(0.784,0.736,0.715)|-1
VRSQTIHQWPATLVQPVGSPLSLECTVEGTSNPNLYWYRQAAGRGLQLLFYSVGIGQISS
EVPQNLSASRPQDRQFILSSKKLLLSDSGFYLCAWS
>V186RF-AACZ03095321.1-trdv |(4778, 5084)|2.994|(0.998,0.998,0.998)|-1
RGMLCDKVTQSSPDQTVASGSEVVLLCTYDAVYSNPDLFWYRIRPDYSFQFVFYGDNSRS
QAADFTQGRFSVKHILTQKAFHLVISPVRTEDSATYYCAF
>V187RF-AACZ03098097.1-ighv |(6348, 6654)|2.97951611711|(0.997,0.997,0.986)|-1
HSQVQLVQSGAEVKKLGASVKVSCKASGYTFTDYFIHWVQQAPGQGLEWMGWINPNSGGT
NYAQKFQSRVTMTRNTSISTAYMELSRLRSDDTAVYYCAR
>V188RF-AACZ03098097.1-ighv |(38713, 39031)|1.80041394223|(0.838,0.521,0.784)|-1
VLSQVQLQQSGPGLVKPSQTLSLTCAISRDSVSSNSAAWNWIRQSPSRGLEWLGRTYYRS
KWYNDYAASVQSRITINPDTSKNQFSLQLNSVTPEDTAVYYCAR
>V189RF-AACZ03098100.1-ighv |(12261, 12570)|2.99699200002|(0.999,1.000,0.998)|-1
VLSQVQLQESGPGLVKPSETLSLTCAVSGGSISSSNWWSWVRQPPGKGLEWIGEIYHSGS
PNYNPSLKSRVTISVDKSKNQFSLKLSSVTAADTAVYYCAR
>V190RF-AACZ03098100.1-ighv |(19369, 19678)|2.99899600001|(1.000,0.999,1.000)|-1
AHSQVQLVQSGAEVKKPGASVKVSCKASGYTFTSYAMHWVRQAPGQRLEWMGWINTGNGN
TKYSQKFQGRVTITRDTSASTAYMELSSLRSEDTAVYYCAR
>V191RF-AACZ03098103.1-ighv |(623, 937)|2.24887175613|(0.935,0.765,0.766)|-1
VLSQVTLKESGPTLVKPTQTLTLTCTFSGFSLSTSGVGVGWIRQPPGKALEWLALIYWDD
DKRYSPSLKSRLTITKDTSKNQVVLTMTNMDPVDTATYYCAHR
>V192RF-AACZ03127313.1-iglv |(14865, 15172)|2.99067605248|(1.000,1.000,0.991)|-1
SWANFMLTQPHSVSESPGQTVTISCTRSSGSIASDYVQWYQQRPGSAPTTVIYEDNRRPS
GVPDRFSGSIDSSSNSASLTISGLKTEDEADYYCQSYDSS
>V193RF-AACZ03127314.1-igkv |(28405, 28711)|1.83788149875|(0.601,0.589,0.813)|-1
SLSQPVLTQSSSASASLGSSVKLTCTLSSGHSSYIIAWHQQQPGKAPRYLMKLEGSGSYN
KGSGVPDRFSGSSSGADRYLTINNLQSEDEADYYCETWGS
>V194RF-AACZ03127321.1-iglv |(54420, 54720)|2.98782001102|(0.999,0.993,0.996)|-1
SLSQLVLTQSPSASASLGASVKLTCTLSSGHSSYAIAWHQQQPEKGPRYLMKLNSDGSHS
KGDGIPDRFSGSSSGAERYLTISSLQSEDEADYYCQTW
>V195RF-AACZ03127321.1-iglv |(122715, 123024)|2.9898400105|(0.998,1.000,0.992)|-1
VDSQTVVTQEPPFSVSPGGTVTLTCGLSSGSVSTSYYPSWYQQTPGQAPRTLIYSTNTRS
SGVPGRFFGSIIGNKAALTITGAQADDESDYYCLLYMGSGI
>V196RF-AACZ03151873.1-igkv |(7769, 8069)|2.99899200002|(0.999,1.000,1.000)|-1
ARCDIQMTQSPSSLSASVGDRVTITCRASQGINNNLNWYQQKPGKTPKLLIYAASSLQSG
IPSRFCDSGSGTDYTLTISSLQPEDFATYYCQQSDGTP
>V197RF-AACZ03151911.1-igkv |(7475, 7775)|2.97506187285|(1.000,0.999,0.978)|-1
ARCDIQMTQSTSSLSASVGDRVTITCRASQGISNNLNWYQQKPGKTPKLLIYAASSLQSG
ILSRFSDSGSGTDYTLTISSLQPEDFAAYYCQQSDSTP
>V198RF-AACZ03171059.1-trav |(889, 1176)|2.25070503159|(0.918,0.644,0.953)|-1
VRSQQPVQSPQAMILREGEDAVVNCSSSKALYSVHWYRQKHGEAPIFLMILLKGGEQKGH
DKISASFNEKKQQSSLYLMASQLSYSGTYFCGAE
>V199RF-AACZ03171126.1-ighv |(3284, 3590)|2.60199719968|(0.962,0.878,0.844)|-1
VLSQVQLQQWGTELLKPSETLSLTCAVYGGSFSGYYWSWIRQPPGKGLEWIGEINHSGST
NYNPSLKSRVTISVDTSKNQFSLKLSSVTAADTAVYYCAR
>V200RF-AACZ03171149.1-trav |(1638, 1925)|2.99294800078|(0.998,1.000,0.995)|-1
VSSEDKVVQSPLSLVVHEGDTVTLNCSYEVTNFQSLLWYKQEKKAPTFLFMLTSSGIEKK
SGRLSSILDKKELFSILNTATQTGDSAIYLCAVE
>V201RF-AACZ03171512.1-trav |(590, 893)|2.99899600001|(1.000,0.999,1.000)|-1
PGIAQKITQTQPGMFVQEKEAVTLDCTYDTSDPSYGLFWYKQPSSGEMIFLIYQGSYDQQ
NATEGRYSLNFQKARKSANLVISASQLGDSAMYFCAVRE
>V202RF-AACZ03171676.1-trav |(1205, 1504)|2.24986913738|(0.982,0.949,0.661)|-1
VNGQQVMQIPQYQHVQEGEDFTTYCNSSTTLSNIQWYKQRPGGHPVFLIQLVKSGEVKKQ
KRLTFQFGEAKKNSSLHITATQTTDVGTYFCAGHSAPQ
>V203RF-AACZ03172648.1-ighv |(10152, 10459)|3.0|(1.000,1.000,1.000)|-1
AQCEVQLVESGGGLVQPGGSLRLSCAASGFTFSNHYTSWVLQAPGKGLEWVSYISGDSGY
TNYADSVKGRFTISRDNAKNSLYLQMNSLRAEDTAVYYCV
>V204RF-AACZ03172650.1-ighv |(24637, 24943)|3.0|(1.000,1.000,1.000)|-1
VQCEVQLVQSGGGLVQPGGSLRLSCAGSGFTFSSYAMHWVRQAPGKGLEWVSAIGTGGGT
YYADSVKGRFTISRDNAKNSLYLQMNSLRAEDMAVYYCAR
>V205RF-AACZ03173117.1-ighv |(1009, 1323)|2.306836289|(0.933,0.693,0.893)|-1
VLSQVTLKESGPVLVKPTETLTLTCTLSGFSLSTSGMGMSWIRQPPGKALEWLAHIFSND
KKSYSTSLKNRLIISKDTSKSQVVLTMTNMDPVDTATYYCAWR
>V206RF-AACZ03177116.1-iglv |(1182, 1492)|2.99498000014|(0.998,1.000,0.997)|-1
SWAQSALTQPASVSGSPGQSITISCTGTSSDVGGYNAVSWYQQHPGKAPKLMIYDVNKRP
SGVSNRFSGSKSGNTASLTISGLQAEDEADYYCSSYRSGGT
>V207RF-AACZ03178854.1-igkv |(8334, 8634)|2.99596000066|(1.000,0.997,0.999)|-1
ARCDIQMTQSPSSLSASVGDRVTITCWASQGISNNLNWYQQKPGKTPKLLIYAASSLQSG
IPSRFSDSGSGTDYTLTISSLQPEDFATYYCQQSDSTS
>V208RF-AACZ03179013.1-igkv |(41180, 41480)|3.0|(1.000,1.000,1.000)|-1
ARCDIQMTQSPSSLSASVGDRVTITCRASQGISNNLNWYQQKPGKTPKLLIYAASSLQSG
IPSRFSDSGSGTDYTLTISSLQPEDFATYYCQQSDSTP
>V209RF-AACZ03179105.1-trdv |(5604, 5904)|2.93061052253|(0.995,0.956,0.986)|-1
SSVAQKVTQAQSSVSMPVRKAVTLNCLYEASWWSYYIFWYKQLPSKEMIFLIRQGSDEQN
AKSGRYSVNFKKAAKSVALTISALQLEDSAKYFCALWE
>V210RF-AACZ03179105.1-trav |(14455, 14745)|2.15380585495|(0.973,0.659,0.881)|-1
VSSILNVEQSPQSLHVQEGDSTSFTCSFPSSNFYALHWYRWETAKSPEALFVMTLNGDEK
KKGRISATLNTKKGYSYLYIKGSQPEDSATYLCAF
>V211RF-AACZ03179105.1-trav |(21888, 22187)|2.19254156213|(0.951,0.884,0.661)|-1
VNGRQVMQIPQYQHVQEGEVFTTYCNSSTTLSNIQWYKQRPGGHPVFLIQLVKSGEVKKQ
KRLTFQFGEAKKNSSLHITATQTTDVGTYFCAGHSAPQ
>V212RF-AACZ03179105.1-trav |(33413, 33703)|2.34433376522|(0.899,0.673,0.989)|-1
TIIDAKTTQSTSMDCAEGRAANLPCNHSTISGNEYIHWYRQIHSQGPQYIIHGLKNNETN
EMASLIITEDRKSSTLILPHATLRDTAVYYCIVRV
>V213RF-AACZ03179806.1-igkv |(3188, 3488)|2.99899200002|(0.999,1.000,1.000)|-1
ARCDIQMTQSPSSLSASVGDRVTITCRASQGIINNLNWYQQKPGKTPKLLIYAASSLQSG
IPSRFSDSGSGTDYTLTISSLQPEDFATYYCQQSDSTP
>V214RF-AACZ03183442.1-igkv |(591, 891)|2.99598000014|(0.999,0.997,1.000)|-1
ARCDIQMTQSPSSMSASVGDRVTITCRASQGINNNLNWYQQKPGKTPKLLIYAASSLQSG
IPSRFCDSGSGTDYTLTISSLQPEDFATYYCQQSDGTP
>V215RF-AACZ03191230.1-iglv |(228, 538)|2.95516889635|(0.987,1.000,0.970)|-1
SWAQSALTQPPSVSGSPGQSVTISCTGTSSDVGGYNYVSWYQQHPGTAPKLMIYDVSKRP
SGVPDRFSGSKSGNTASLTISGLQAEDEADYYCCSYAGSYS
>V0RF-AJFE01000016.1-trdv |(1583, 1883)|2.29139587219|(0.897,0.706,0.838)|1
SSVAQKVTQAQSSVSMPVRKAVTLNCLHEASWWSYYIFWYKQLPSKEMIFLIRQGSDELN
AKSGRYSVNFKKAAKSVTLTISALQLEDSAKYFCALWE
>V1RF-AJFE01003265.1-ighv |(14098, 14407)|3.0|(1.000,1.000,1.000)|1
VQCEVQLVESGGGLVQPGGSLRLSCAASGFTFSSYWMHWVRQAPGKGLVWVSRINSDGSS
TSYADSLKGQFTISRDNAKNTLYLQMNSLRAEDMAVYYCTR
>V2RF-AJFE01011107.1-ighv |(15076, 15385)|2.80640906282|(0.997,0.998,0.872)|1
TYSQVQLVQSGHEVKQPGASVKVSCKASGYSFTTYGMNWVRQAPGQGLEWMGWFNTYTGN
PTYAQGFTGRFVFSMDTSVGTAYLQISSLKAEDTAMYYCAR
>V3RF-AJFE01011110.1-ighv |(45852, 46161)|3.0|(1.000,1.000,1.000)|1
VQCEVQLLESGGGLVQPGGSLRLSCAASGFTFSSYWMHWVRQAPGKGLEWVSRINSDGSS
TSYADSVKGRFTISRDNAKNTLYLQMNSLRAEDTAVYYCTR
>V4RF-AJFE01011110.1-ighv |(53572, 53887)|3.0|(1.000,1.000,1.000)|1
VQCEVQLVESGGGLVQPGGSLRLSCAASGFTFSGSAMHWVRQASGKGLEWVGRIRSKANS
YATAYAASVKGRFTISRDDSKNKAYLQMNSLKTEDTAVYYCTT
>V5RF-AJFE01011111.1-ighv |(20882, 21191)|2.66764483193|(0.988,0.968,0.820)|1
VQSQVQLVQSGAEVKKPGSSVKVSCKVSGGTFSSYAISWVRQAPGQGLEWMGVIIPILGT
ANYAQKFQGRVTITADESTSTAYMELSSLRSEDTAVYYCAT
>V6RF-AJFE01011113.1-ighv |(30008, 30314)|3.0|(1.000,1.000,1.000)|1
VQCEVQLVESGGGLVQPGGSLRLSCAASGFTFSSYAMHWVRQAPGKGLEWVSLIYSGDST
YYADSVKGRFTISRDNSKNTLYLQMGSLRAEDTAVYYCAR
>V7RF-AJFE01011588.1-igkv |(6066, 6365)|2.99798400013|(1.000,1.000,0.998)|1
ARCDIQVTQSPSSLSASVGDRVTITCRASQGISNGLSWYQQKPGQAPTLLIYAASSLQSG
IPSRFSGSGSGTDFTLTISSLQPEDVATYYCLQDYTTH
>V8RF-AJFE01012232.1-igkv |(670, 988)|2.93464593441|(0.999,0.948,0.998)|1
SSGDIVMTQAPLSLPITPGEPASISCRSSQSLLDSDDGNTYLDWYLQKPGQSPQLLIYTL
SYRASGVPDRFSGSGSGTDFTLKISRVEAEDVGVYYCMQHIEFP
>V9RF-AJFE01012232.1-igkv |(11186, 11479)|3.0|(1.000,1.000,1.000)|1
ARCDIQMTQSPSSLSASVGDRVTITCRASQSISNYLSWYQQKPGKAPKLLIYYASTLQSG
VPSRFSGSGSGTDFTLTISSLQPEDFATYYCQHGYG
>V10RF-AJFE01012232.1-igkv |(33464, 33764)|2.99593600205|(1.000,0.996,1.000)|1
ARCDIQLTQSPSSLSASVGDRVTITCRASQGISSYLNWYQQKPGKVPKLLIYSASNLQSG
VPSRFSGSGSGTDFTLTISSLQPEDVATYYCQRTYNAP
>V11RF-AJFE01012232.1-igkv |(62717, 63017)|2.99698000014|(1.000,0.998,0.999)|1
ARCDIRMTQSPSSLSASVGDRVTITCQASQDISNYLNWYQQKPGKAPKLLIYDASNLETG
VPSRFSGSGSGTDFTFTISSLQPEDIATYYCQQYDNLP
>V12RF-AJFE01012234.1-igkv |(5885, 6200)|2.62541489974|(0.965,0.896,0.842)|1
SSGDVVMTQSPRSLPVTLGQPASISCRSSQSLVYSDGNTYLSWIQQRPGQPPRLLIYKVS
NRDSGVPDRFSGSGAGTDFTLKISRVEAEDVGVYYCVQGIQLP
>V13RF-AJFE01012234.1-igkv |(16459, 16774)|2.99285201038|(1.000,0.999,0.994)|1
SSADIVMTQTPLSLSVTPGQPASISCKSSQSLLHSDGNTYLYWYLQKPGQSPQLLIYRVS
NRASGVPDRFSGSGSGTDFTLKISRVEAEDVGVYYCMQGIQLP
>V14RF-AJFE01012234.1-igkv |(28936, 29251)|2.98197252412|(1.000,0.984,0.999)|1
SSGDIVMTQSPLSLPVTPGEPASISCRSSQSLLHSNRYNYLDWYLQKPGQSPQLLIYLGS
NRASGVPDRFSGSGSGTDFTLKISRVEAEDVGVYYCMQALQTP
>V15RF-AJFE01012235.1-igkv |(6765, 7067)|2.99799600001|(0.999,1.000,0.999)|1
SSGDIVMTQTPLSSPVTLGQPASISCRSSQSLVHSDGNTYLSWLQQRPGQPPRLLIYKVS
NRFSGVPDRFSGSGAGTDFTLKISRVEAEDVGVYYCTQA
>V16RF-AJFE01012235.1-igkv |(23412, 23710)|2.44371239815|(0.995,0.718,0.995)|1
SRGEIVLTQSPDFQSVPPKEKVTITCRASQSIGSSLHWYQQKPGQSPKLLIKYASQSISG
VPSRFSGSGSGTDFTLTINSLEAEDAATYYCQQSSSL
>V17RF-AJFE01012236.1-igkv |(7268, 7564)|2.97506187285|(1.000,0.978,0.999)|1
TTGEIVLMQSSATLSLSPGERATLSCRASQSVSSSYLAWYQQKPGQAPRLLIYDASTRAT
GIPDRFSGSGSGTDFTLTISRLEPEDFAVYYCQQYGS
>V18RF-AJFE01012238.1-igkv |(1220, 1535)|2.53818451818|(0.974,0.773,0.944)|1
SSGDIVMTQNPPSLPVNPGEPASISCRSSQSLLHSNGYTYLHWYLQKPGQSPQLLIYRVS
NRFSGIPDRFSGSGSGSDFTLKISWVEAEDVGVYYCMQATQFP
>V19RF-AJFE01012238.1-igkv |(18126, 18418)|2.40003833133|(0.877,0.724,0.889)|1
SRGDVVMTQSPAFLSVTPGEKVTITCQASEGIGNYLYWYQQKPDQAPKLLIKYASQSISG
VPSRFSGSGSGTDFTFTISSLEAEDAATYYRQQGN
>V20RF-AJFE01012238.1-igkv |(29982, 30282)|2.99899600001|(1.000,0.999,1.000)|1
ARCDIQMTQSPSSLSASVGDRVTITCRASQGISNYLAWFQQKPGKVPKRLIYAASSLQSG
VPSRFSGSGSGTEFTLTISSLQPEDFATYYCLQHNSYP
>V21RF-AJFE01012238.1-igkv |(62062, 62362)|2.65716620566|(0.947,1.000,0.802)|1
TTGEIVLTQSPATLSLSPGERATLSCRASQSVSSYLAWYQQKPGQAPRLLIYGASNRATG
IPARFSGSGSRTDFTLTISSVEPEDFAVYYCQQYNNQP
>V22RF-AJFE01012245.1-igkv |(2610, 2910)|3.0|(1.000,1.000,1.000)|1
ARCAIQLTQSPSSLSASVGDRVTITCRASQGISNRLNWYQQKPGKAPKLLIYDASSLESG
VPSRFSGSGSGTDFTLTISSLQPEDFATYYCQQFNSYP
>V23RF-AJFE01012249.1-igkv |(2485, 2785)|2.99698000014|(1.000,0.998,0.999)|1
TTREIVLTQSPATLSLSPGEKATLSCRASQSVSSYLAWYQQKPGQAPRLLIYDASNRATG
IPARFSGSGSGTDFTLTISSLEPEDFAVYYCQQRSNWH
>V24RF-AJFE01016082.1-igkv |(1156, 1468)|2.32342466308|(0.790,0.998,0.716)|1
CNGDIVLTQSPASLAVSPGQRATITCRASESVSFLGINLIHWYQQKPGQPPKLLIYQASN
KDTGVPAGFSSSGSGTDFTLTINPVEANDTANYYCLQSKNFP
>V25RF-AJFE01024273.1-trdv |(100475, 100781)|2.994|(0.998,0.998,0.998)|1
RGMLCDKVTQSSPDQTVASGSEVVLLCTYDAVYSNPDLFWYRIRPDYSFQFVFYGDNSRS
QAADFTQGRFSVKHILTQKAFHLVISPVRTEDSATYYCAF
>V26RF-AJFE01038664.1-trgv |(24515, 24829)|1.55039850394|(0.582,0.434,0.626)|1
TRPTGSSAEITCDLPGASTLYIRWHLHQEGKAPQCLLYYEPYYSRVVLESGITPGKYDTG
STRSNWNLRLQNLIENDSGVYYCATWDRHSDSDTENLPVVASG
>V27RF-AJFE01038664.1-trgv |(28742, 29055)|2.95184543622|(1.000,0.984,0.972)|1
SQKSSNLEGRTKSVTRETRSSAEITCDLTVTNTFYIHWYLHQEGKAPQRLLYYDVSTARD
VLESGLSPGKYYTHTPRRWSWILRLQNLIENDSGVYYCATWD
>V28RF-AJFE01038665.1-trgv |(1085, 1398)|2.98696000066|(0.997,0.996,0.994)|1
SQKSSNLEGRTKSVIRQTGSSAEITCDLDGGSTGYIHWYLHQEGKAPQRLLYYDSYTSRV
VLESGISPGKYDTYGSTRKNLRLILRNLIENDSGVYYCATWD
>V29RF-AJFE01038666.1-trgv |(1901, 2214)|2.96226365316|(0.998,0.995,0.972)|1
SQKSSNLEGRMKSVTRPTGSSAEITCDLTVINAVYIHWYLHQEGKSPQRLLYYDVSNSRD
VLESGLSPGKYYTHTPRRWSWILRLQNLIENDSGVYYCATWD
>V30RF-AJFE01038666.1-trav |(16565, 16874)|1.69991505964|(0.601,0.588,0.531)|1
RMKSVTRPTGSSAVITCDLPVENAGYTHWYLHQEGKAPQRLLYYDSYNSRVVLESGISQE
KYHTYASTGKSLKFILENLIERDSGVYYCATWDRHSDSDLC
>V31RF-AJFE01039607.1-trbv |(115731, 116041)|1.78043560256|(0.617,0.697,0.525)|1
SMDTGITQTPKYLVTAMGSKRTMKREHLRHDSMYWYRQKAKKSLEFMFYYNCKEFIENKT
VPNHFTPECPDSSRLYLHVVALQQEDSAVYLCTSSQDTALQ
>V32RF-AJFE01039607.1-trbv |(117721, 118021)|2.92629798149|(0.993,0.999,0.944)|1
LTEPEVTQTPSHQVTQMGQEVILRCVPISNHLYFYWYRQILGQKVEFLVSFYNNEISEKS
EIFDDQFSVERPDGSNFTLKIWSTKLEDSAMYFCASSE
>V33RF-AJFE01039607.1-trbv |(129949, 130246)|2.99299600001|(0.998,0.998,0.997)|1
PIDTEVTQTPKHLVMGMTNKKSLKCEQHMGHRAMYWYKQKAKKPPELMFVYSYEKLSINE
SVPSRFSPECPNSSLLNLHLHALQPEDSALYLCASSQ
>V34RF-AJFE01039607.1-trbv |(137829, 138125)|2.99294800078|(0.998,0.995,1.000)|1
PVEAGVTQTPRYLIKARGQQVTLSCSPISGHRSVSWYQQTPGQGLQFLFEYFSETQRNKG
NFPGRFSGRQFSNSRSEMNVSTLELGDSALYLCASSL
>V35RF-AJFE01039608.1-trbv |(1218, 1515)|2.99899600001|(1.000,1.000,0.999)|1
PVNAGVTQTPKFQVLKTGQSMTLQCAQDMNHNSMYWYRQDPGMGLRLIYYSVGEGTTDKG
EVPDGYNVSRLNKREFSLRLESAAPSQTSVYFCASSE
>V36RF-AJFE01039609.1-trbv |(5245, 5558)|2.93008808336|(1.000,1.000,0.943)|1
PMEMGVTQTPRHLVMGMTNKKSLKCEQHLGHNAMYWYKQSAKKPLELMFVYNFKEQTENN
SVPSRFSPECPNSSHLFLHLHALQPEDSALYLCASSQDTALQ
>V37RF-AJFE01045032.1-ighv |(257, 569)|2.54477500585|(0.999,0.959,0.775)|1
VLSQVQLQQWGPGLVKPSETLSLTCAVYGGSISSSGYYWSWIRQPPGKGLEWIGEINHSG
STNYNPSLKSRVTISVDTSKNQFSLKLSSVTAADTAVYYCAR
>V38RF-AJFE01045035.1-ighv |(280, 602)|2.20297612256|(0.774,0.650,0.913)|1
VLSQVTLKESGPVLVKPTETLTLTCTISGFSLSNAGMGVSWIRQPPGKALEWLAHIFWND
EKSYSTSLKSRLTISKDTSKSQVVLTMTNMDPVDTATYYCTRRAQ
>V39RF-AJFE01045037.1-ighv |(4711, 5020)|2.95229565252|(0.994,0.968,0.993)|1
THAQVQLVQSGAEVKKPGATVKISCKASGYTLTELSMHWVRQAPGKGLEWMGGFDPEDGE
TIYAQKFQGRVTMTEDTSTDTAYMELSSLRSEDTAVYYCAT
>V40RF-AJFE01045037.1-ighv |(12790, 13099)|2.99899600001|(1.000,0.999,1.000)|1
VQCEVQLVESGGGLVKPGGSLRLSCAASGFTFSNYYMHWVRQAPEKGLEWVSTISGSGGS
TWYPDSVKGRFTISRDNSKNTLYLQMNSLRAEDTAVYYCAR
>V41RF-AJFE01045037.1-ighv |(23646, 23958)|2.99696400065|(1.000,1.000,0.997)|1
VQCEVQLVESGGGLVKPGGSLRLSCAASGFTFSSYSMNWVRQAPGKGLEWVAYISSPSGS
STYYADSVKGRFTISRDNSKNTLYLQMNSLRAEDTAVYYCAR
>V42RF-AJFE01045041.1-ighv |(1266, 1575)|3.0|(1.000,1.000,1.000)|1
VQCEVQLVESGGALVKPGGSLRLSCAASGFTFSSYGMHWVRQAPGKGLEWVSYISYDSSY
IYYADSVKGRFTISRDNAKNSLYLQMNSLRAEDTAVYYCAR
>V43RF-AJFE01045048.1-ighv |(1386, 1695)|3.0|(1.000,1.000,1.000)|1
VQCEVQLVESGGGLVQPGGSLRLSCAASGFTFDDYGMSWVRQAPGKGLEWVSLISWDGGS
TYYADSVKGRFTISRDNSKNSLYLQMNSLRAEDTALYYCAR
>V44RF-AJFE01045051.1-ighv |(2850, 3156)|2.99596000066|(1.000,0.999,0.997)|1
VLSQLQLQESGPGLVKPSETLSLTCTVSGGSISSYYWSWIRQPPGKGLEWIGNIYYSGSA
YYNPSLKSRVTISVDTSKNQFSLKLSSVTAADTAVYYCAR
>V45RF-AJFE01045051.1-ighv |(17267, 17573)|3.0|(1.000,1.000,1.000)|1
VQCEVQLVESGGGLVQPGGSLRLSCAASGFTVSSYHMSWVRQAPGKGLEWVSVIYSGGST
YYADSVKGRFTISRDNSKNTLYLQMNSLRAEDTAVYYCAR
>V46RF-AJFE01045051.1-ighv |(31190, 31497)|2.61199677071|(0.990,0.987,0.787)|1
VCAEVQLVQSGAEVKKPGESLKISCKGSGYSFTSYWIGWVRQMPGKGLEWMGIIYPGDSD
TRYSPSFQGQVTISADKSISTAYLQWSSLKASDTAMYYCA
>V47RF-AJFE01045051.1-ighv |(52919, 53234)|3.0|(1.000,1.000,1.000)|1
VQCEVQLVESGGGLVQPGRSLRLSCTASGFTFGDYAMSWIRQAPGKGLEWVGFIRSKAYG
GTTEYAASVKGRFTISRDDSKSIAYLQMNGLKTEDTAVYYCTR
>V48RF-AJFE01045051.1-ighv |(68146, 68452)|2.10172437926|(0.988,0.589,0.996)|1
VQCEDQLVESGGGLVQPGGSLRPSCAASGFAFSSYVLHWVRRAPGKGLEWVSAIGTGGDT
YYADSVMGRFTISRDNAKKSLYLQMNSLIAEDMAVYYCAR
>V49RF-AJFE01045051.1-ighv |(75870, 76179)|2.99899200002|(0.999,1.000,1.000)|1
AHSQVQLVQSGAEVKKPGASVKVSCKASGYTFTSYTISWLRQAPGQGLEWMGVISPSDGS
TSYAQKFQGRVTMTRDTSTSTVYMELSSLRSEDTAVYYCAR
>V50RF-AJFE01045051.1-ighv |(79995, 80304)|2.99899600001|(1.000,0.999,1.000)|1
AYSQMQLVQSGAEVKKPGSSVKVSCKASGYTFTYRYLHWVRQAPGQALEWMGWITPYNGN
TNYAQKFQDRVTITRDRSMSTAYMELRSLRSEDSAVYYCAR
>V51RF-AJFE01045053.1-ighv |(1090, 1399)|2.66580713845|(0.914,0.844,0.928)|1
VQCEVQLVESGGGLVQPGGSLRLSCAASGFTFSNSDTNWVHQAPGKGLELVSGVSWNGSR
MHYADSVKGRFIISRDNSRNSLYLQTNSLRAEDTAVYYCVR
>V52RF-AJFE01069972.1-trav |(2006, 2315)|1.5668578468|(0.904,0.585,0.646)|1
TVMYLVLGTTGQNTDQPTEMTATEGAIVQINCTYQTSGFNGLFWYQQHAGEAPTFLSYNV
LDGLEEKGRFSLFLSRSKGYSYLLLKELQMKDSASYLCAVR
>V53RF-AJFE01069974.1-trav |(29024, 29340)|2.47377584976|(0.972,0.751,0.934)|1
QSVAQPEDQVKVAEGNPLTVKCTYSVSGNPYLFWYVQYPNRGLQFLLKYITGDNLVKGSY
GFEAEFNKSQTSFHLKKPSALVSDSALYFCAVRDTLIGAAGGA
>V54RF-AJFE01069975.1-trav |(15309, 15599)|3.0|(1.000,1.000,1.000)|1
MTRGEDVEQSLFLSVREGDSSVINCTYTDSSSTYLYWYKQEPGAGLQLLTYIFSNMDMKQ
DQRLTVLLNKKDKHLSLRIADTQTGDSAIYFCAES
>V55RF-AJFE01069975.1-trav |(34873, 35161)|3.0|(1.000,1.000,1.000)|1
VKSQKIEQNSEALNIQEGKTATLTCNYTNYSPAYLQWYRQDPGRGPVFLLLIRENEKEKR
KERLKVTFDTTLKQGVFHITASQPADSATYLCAL
>V56RF-AJFE01069975.1-trav |(49199, 49486)|2.98894800078|(0.998,0.996,0.995)|1
ANGENQVEHSPHFLGPQQGDVASMSCTYSVSRFNNLQWYRQNTGMGPKHLLSMYSAGYEK
QKGRLNAILLKNGSSLYITAVQPEDSATYFCAVD
>V57RF-AJFE01069975.1-trav |(63490, 63787)|2.11109372325|(0.869,0.830,0.627)|1
DARAQSVSQHNHHVILSEAASLELGCNYSYGGTVNLFWYVQYPGQHLQLLLKYFSGDPLV
KGIKGFEAEFIKSKFSFNLRKPSVQWSDTAEYFCAVN
>V58RF-AJFE01069975.1-trav |(77622, 77916)|2.99798400013|(1.000,0.998,1.000)|1
GINGDSVVQTEGQVLLSEGDSLIVNCSYETTQYPSLLWYVLYPGEGPQLLLKAMKANDNG
RNKGFEATYRKETTSFHLEKDSVQESDSAVYFCALS
>V59RF-AJFE01069975.1-trav |(91696, 91989)|2.99796800026|(0.998,1.000,1.000)|1
GSGKNQVEQSPQSLIILEGKNCTLQCNYTVSPFNNLRWYKQDTGRGPVSLTIMTFSENTK
SNGRYTATLDADTKKSSLHITASQLSDSASYICVVS
>V60RF-AJFE01069975.1-trav |(107426, 107714)|3.0|(1.000,1.000,1.000)|1
VWSQRKEVEQDPGPFNVPEGATVAFNCTYSNSASQSFFWYRQDCRKEPKLLMSVYSSGNE
DGRFTAQLNRASQYISLLIRDSKLSDSATYLCAV
>V61RF-AJFE01069975.1-trav |(118638, 118935)|2.99389600501|(1.000,0.995,0.999)|1
TVRAQSVTQPDIHITVSEGASLELRCNYSYGATPSLFWYVQSPGQGLQLLLKYFSGDTLV
QGIKGFEAEFKRSQSSFNLRKPSVHWSDAAEYFCAVG
>V62RF-AJFE01069975.1-trav |(134910, 135200)|2.99392000218|(1.000,0.998,0.996)|1
VNGENVEQHPSTLSVQEGDGAVIKCTYSDSASNYFPWYKQELGKGPQLIIDIRSNMGEKK
DQRIAVTLNKTAKHFSLHITETQPEDSAVYFCAAS
>V63RF-AJFE01069975.1-trav |(154372, 154663)|2.99699200002|(0.999,1.000,0.998)|1
VWSQQKEVEQNSGPLSVPEGAIASLNCTYSDRRSQSFFWYRQYSGKSPELIMSIYSNGDE
EDGRFTAQLNKASQYVSLLIRDSQPSDSATYLCAV
>V64RF-AJFE01069975.1-trav |(160863, 161160)|3.0|(1.000,1.000,1.000)|1
GTRAQSATQLDSHVSVSEGALVLLRCNYSSSVPPYLFWYVQYPNQGLQLLLKYTTGATLV
KGINGFEAEFKKSETSFHLTKPSAHVNDAAEYFCAVS
>V65RF-AJFE01069976.1-trav |(18238, 18531)|2.99593600205|(1.000,0.996,1.000)|1
VSRGESVGLHLPTLSVQEGDNSIINCAYSNSASDYFIWYKQESGKGPQFIIDIRSNMDKR
QGQRVTVLLNKTVKHLSLQIAATQPGDSAVYFCAEN
>V66RF-AJFE01069976.1-trav |(24122, 24425)|2.99899600001|(1.000,0.999,1.000)|1
PGIAQKITQTQPGMFVQEKEAVTLDCTYDTSDPSYGLFWYKQPSSGEMIFLIYQGSYDQQ
NATEGRYSLNFQKARKSANLVISASQLGDSAMYFCAVRE
>V67RF-AJFE01069976.1-trav |(40935, 41229)|3.0|(1.000,1.000,1.000)|1
RTRGDSVTQMEGPVTLSEEAFLTINCTYTATGYPSLFWYVQYPGEGLQLLLKATKADDKG
SNKGFEATYRKETTSFHLEKDSVQASDSAVYFCALS
>V68RF-AJFE01069976.1-trav |(65330, 65623)|2.99594800078|(0.997,1.000,0.999)|1
VWSQQKEVEQDPGPLSVPEGAIASLNCTYSNSAFQYFMWYRQYSRKGPELLMYTYSSGNK
EDGRFIAQVDTSSKYISLFIRDSQPSDSATYLCAMS
>V69RF-AJFE01069976.1-trav |(78780, 79071)|1.57392348702|(0.939,0.658,0.606)|1
GTRAQSVTQLDSQVFEEAPVELRCNYSSSVSVYLFWYVQYPNQGLQLLLKYLSGSTLVKG
INGFEAEFKKSETSFHLRKPSVHISDAAEYFCAVS
>V70RF-AJFE01069976.1-trav |(97788, 98075)|2.99899200002|(0.999,1.000,1.000)|1
VNSQQGEEDPQALSIQEGENAIMNCSYKTSINNLQWYRQNSGRGLVHLILIRSNEREKHS
GRLRVTLDTSKKSSSLLITASRAADTASYFCATD
>V71RF-AJFE01069976.1-trdv |(107857, 108160)|3.0|(1.000,1.000,1.000)|1
SSMAQKVTQAQTEISVVEKEDVTLDCVYETRDTTYYLFWYKQPPSGELVFLIRRNSFDEQ
NEISGRYSWNFQKSTSSFNFTITASQVVDSAVYFCALSE
>V72RF-AJFE01069977.1-trav |(1078, 1365)|2.99899600001|(1.000,1.000,0.999)|1
LSGEDQVTQSPEALRLQEGESSSLNCSYTVSGLRGLFWYRQDPGKGPEFLFTLYSAGEEK
EKERLKATLTKKESFLHITAPKPEDSATYLCAVQ
>V73RF-AJFE01069977.1-trav |(12990, 13289)|2.41332097845|(0.897,0.702,0.988)|1
VSSKQEVTQIPAALSVPEGDNLVLNCSFTDSAIYSLQWFRQDPGKGLTSLLLIQSSQREQ
TSGRLNASLDKSSGRSTLYIAASQPGDSATYLCAVRHS
>V74RF-AJFE01069977.1-trav |(31158, 31455)|1.84960334351|(0.714,0.533,0.726)|1
VRGIQVEQSPPDLILQEGANSTLRCNFSASVNNLQWFHQNPWGQLINLFYIPSGTKQNGR
LSATTVATERYSLLYISSSQTTDSGVYFCAVEPQCSP
>V75RF-AJFE01069977.1-trdv |(56532, 56832)|2.29139587219|(0.897,0.706,0.838)|1
SSVAQKVTQAQSSVSMPVRKAVTLNCLHEASWWSYYIFWYKQLPSKEMIFLIRQGSDELN
AKSGRYSVNFKKAAKSVTLTISALQLEDSAKYFCALWE
>V76RF-AJFE01070458.1-trbv |(41725, 42019)|2.03207674124|(0.769,0.632,0.715)|1
VRSQTIHQWPATLVQPVGSPLSLECTVEGTSNPNLYWYRQAAGRGLQVLFYSVGIGQISS
EVPQNLSASRPQDRQFILSSKKLLLSDSGFYLCAWS
>V77RF-AJFE01104359.1-trbv |(3464, 3764)|2.41379134264|(0.901,0.794,0.802)|1
SMDTKVTQRPRLLVKANEQKAKTDCVPIKRHSYVYWYHKTLEEELKFLIYFQNEEIIQKA
EIINERFSAQCPQNSPCTLEIQSTESGDTAWYFCANSK
>V78RF-AJFE01104359.1-trbv |(12388, 12676)|1.55186089188|(0.612,0.518,0.503)|1
CFHAKVTQTPGYLVKGKGRKTKMYYTPENGHTFVCWYQQNQNKEFMFLISFQNEQVLQEM
EMHKKRFSSQCPKNPPCSLAILSSEPGDTALYLC
>V79RF-AJFE01104359.1-trbv |(36551, 36842)|2.99389600501|(1.000,0.995,0.999)|1
LMEAEIYQTPRHRVIGTGKKITLECSQTMGHDKMYWSRSRNGITPHPPFLWVNSTEKGDL
SSESTVSRIRIERFPLTLESASPSHTSQYLCASSE
>V80RF-AJFE01104369.1-trbv |(8636, 8939)|2.99699200002|(0.999,0.998,1.000)|1
SVFSAVISQKPSRDICQRGTSMTIQCQVDSQVTMMFWYCQQPGQSMTLIATANQGSEATY
ESRFVIDKFPISRPNLTFSTLTVSNRRPEDSSIYLCSVE
>V81RF-AJFE01000028.1-igkv |(103568, 103886)|2.29380667749|(0.987,0.659,0.998)|-1
SSGDIVMTQTPLSLPVTPGEPASISCRSSESLLDTDDEYTYLNWYLQKPGQSPQLLIYEV
SNRASGVPDRFSGSGSGTDFTLKISRVEAEDVGVYYCMQALQTP
>V82RF-AJFE01002289.1-igkv |(593, 893)|2.99696400065|(1.000,0.997,1.000)|-1
ARCDIQMTQSPSSLSASVGDRVTITCRASQGIRNDLGWYQQKPGKAPKLLIYAASSLQSG
VPSRFSGSGSGTDFTLTISSLQPEDFATYYCLQDYNYP
>V83RF-AJFE01002352.1-igkv |(655, 955)|2.99698000014|(1.000,0.999,0.998)|-1
ARCAIRMTQSPSSLSASTGDRVTITCRASQGISSYLAWYQQKPGKAPKLLIYAASTLQSG
VPSRFSGSGSGTEFTLTISCLQSEDFATYYCQQYYSYP
>V84RF-AJFE01003455.1-igkv |(8866, 9184)|2.85751751797|(0.999,0.910,0.981)|-1
TSGDIVMTQTPLSLPVTPGEPASISCRSSQSLLDSDDGNAYLDWYLQKPGQSPQLLIYEV
SNWASGVPDRFSGSGSGTDFTLKISRVEAEDVGVYYCMQALQTP
>V85RF-AJFE01010527.1-trdv |(4455, 4755)|2.29139587219|(0.897,0.706,0.838)|-1
SSVAQKVTQAQSSVSMPVRKAVTLNCLHEASWWSYYIFWYKQLPSKEMIFLIRQGSDELN
AKSGRYSVNFKKAAKSVTLTISALQLEDSAKYFCALWE
>V86RF-AJFE01010527.1-trav |(11555, 11845)|2.9338222392|(0.985,0.962,0.989)|-1
VSSILNVEQSPQSLHVQEGDSTNFTCSFPSSNFYALHWYRWETAKSPEALFVMTLNGDEK
KTGRISATLNTKEGYSYLYIKGSQPEDSATYLCAF
>V87RF-AJFE01010827.1-iglv |(3125, 3428)|2.9696826523|(0.998,1.000,0.974)|-1
SVTSYVLTQPPSVSVAPEQTARITCGGNNIGSKSVHWYQQKPGQAPVLVIYDDSDRPSGI
PERFSGSKSGNTATLTISRVEAGDEADYYCQVWDSSSKH
>V88RF-AJFE01010827.1-iglv |(11046, 11349)|3.0|(1.000,1.000,1.000)|-1
SVVSSELTQDPAVSVALGQTVRITCQGDSLRSYYASWYQQKPGQAPVLVIYGNNNRPSGI
PDRFSGSSSGNTASLTITGAQAEDEADYYCSSLDSSGNH
>V89RF-AJFE01010827.1-iglv |(27044, 27354)|2.96953206285|(0.991,0.982,0.997)|-1
SWAQSALTQPPSVSGSPGQSVTISCTGTSSDVGSYNRVSWDQQPPGKAPKLMIYEVSKRP
SGVPDRFSGSKSGNTASLTISGLQAEDEADYYCSSYTSSST
>V90RF-AJFE01010828.1-iglv |(147, 450)|2.99296000066|(0.997,1.000,0.996)|-1
SVTSYVLTQPPSVSVAPGQTARITCGGNNIGSKSVHWYQQKPGQAPVLVVYDDSDQPSGI
PERFSGSKSGNTATLTISRVEAGDEADYYCQVWDSSSDH
>V91RF-AJFE01010829.1-iglv |(16809, 17106)|2.99696400065|(1.000,0.997,1.000)|-1
SVASYELTQPSSVSVSPGQTARITCSGDVLAKNYARWFQQKPGQAPVLVIYKDSERPSGI
PERFSGSSSGTTVTLTISGAQVEDEADYYCYSAADNN
>V92RF-AJFE01010829.1-iglv |(39526, 39836)|2.31351849522|(0.851,0.996,0.670)|-1
SWAQSALTQPPSVSGSPGQSVTISCTGTSTDIGSYNTVSWYQQHPGKAPKLMIYDVRWRP
SGVPDRFSGSKSGNTASLTISGLQAEDEADYSCCSYAGSST
>V93RF-AJFE01010857.1-ighv |(227, 534)|2.73381848264|(0.957,0.979,0.847)|-1
AHSQVQLVQSGAEVKKPGASVKISCKASGYTFTSYGISWVRQAPGQGLEWMGWIDAYYGN
TNYAEKLQGRVTMTTDTSRRTAYMELRRLRSDHTAVYYCA
>V94RF-AJFE01017581.1-iglv |(4261, 4557)|2.99899600001|(1.000,0.999,1.000)|-1
SVASYELTQPPSVSVSPGQTASITCSGDKLGDKYAYWYQQKSGQSPVLVIYQDSKRPSGI
PERFSGSNSGNTATLTISGTQAMDEADYYCQAWDSST
>V95RF-AJFE01017582.1-iglv |(28022, 28320)|1.87600933137|(0.702,0.576,0.665)|-1
LCALPVLTQPPSASASLGASVKLTCTLSSEHSTYTIEWYQQRPGRSPQYIMEVKSDGSHS
KGDGIPDRFMGSSSGADRYLTISNLQSDDEAEYHCGE
>V96RF-AJFE01017584.1-iglv |(3557, 3860)|3.0|(1.000,1.000,1.000)|-1
SEASYELTQPPSVSVSPGQTARITCSGDALPKQYAYWYQQKSGQAPVLIIYEDSKRPSGI
PERFSGSSSGTMATLTISGAQVEDEADYYCYSTDSSGNH
>V97RF-AJFE01017584.1-iglv |(14566, 14876)|2.90346854|(1.000,0.971,0.947)|-1
SWAQSALTQPPSASRSPGQSVTISCTGTSSDIGGYNYVSWYQQHPGKAPKLMIYEVSKRP
SGVPDRFSGSKSGNTASLTVSGLQAEDEADYYCSSYAGSNN
>V98RF-AJFE01017586.1-iglv |(12261, 12571)|2.95516889635|(0.987,1.000,0.970)|-1
SWAQSALTQPPSVSGSPGQSVTISCTGTSSDVGGYNYVSWYQQHPGTAPKLMIYDVSKRP
SGVPDRFSGSKSGNTASLTISGLQAEDEADYYCCSYAGSYS
>V99RF-AJFE01017587.1-iglv |(6592, 6895)|1.97324334769|(0.976,0.543,0.982)|-1
SATSYELTQPHSVSVATAQTARITCRGNNIGSKAVHWYQQKPGQDPVLVIYSDSNRPSGI
PERFSGSNSGNTATLTISRVEAGDEADYYCQVWDSSSDH
>V100RF-AJFE01020628.1-iglv |(6538, 6850)|2.99899600001|(1.000,0.999,1.000)|-1
SWAQSVLTQPPSVSGAPGQRVTISCTGSSSNIGAGYDVHWYQQLPGTAPKLLIYENNKRP
SGVPDRFSGSKSGTSASLAITGLQAEDEADYYCQSYDSSLSG
>V101RF-AJFE01020628.1-iglv |(24239, 24549)|2.37996588028|(0.819,0.719,0.982)|-1
SLSQPVLTQPPSFSASPGESARLTCTLPSDINVGSYNIYWYQQKPGSPPRYLLYYYSDSD
KGQGSGVPSRFSGSKDASANTGILVISGLQSEDAADYYCMI
>V102RF-AJFE01020631.1-iglv |(2749, 3058)|2.99699200002|(0.999,1.000,0.998)|-1
SWAQSVLTQPPSVSGTPGQRVTISCSGSSSNIGSNTVNWYQQLPGTAPKLLIYSNNQRPS
GVPDRFSGSKSGTSASLAVSGLRSEDEADYYCAAWDDSLNG
>V103RF-AJFE01020631.1-iglv |(16910, 17217)|1.87271454616|(0.863,0.928,0.503)|-1
SNSQTVVTQEPSLTVSPGGTVTLTCASSIEAVTSGYYPNWFQQKPGQAPRALIYSTSNKH
SWTPARFSGSLLGGKAALTLSGAQPEDEAEYYCLLYYGGA
>V104RF-AJFE01020631.1-iglv |(24444, 24762)|2.96190837717|(0.999,0.967,1.000)|-1
SLSQPVLTQPTSLSASPGASARLTCTLRSGINVGSYYISWYQQKPGSPPRYLLNYYSDSD
KGQGSGVPSRFSGSKDASTNAGLLLISGLQSEDEADYYCAIWYS
>V105RF-AJFE01020632.1-iglv |(18572, 18882)|2.93653720745|(0.996,0.975,0.970)|-1
SLSQSVVTQPASLSASPGASASLTCTLRSGINVGTYRISWYQQKPGSPPRYLLRYKSDSD
KQQGSGVPSRFSGSKDASANAGILVISGLQSEDEADYYCMI
>V106RF-AJFE01020634.1-iglv |(1918, 2227)|2.99593600205|(1.000,1.000,0.996)|-1
SWAQSVLTQPPSVSAAPGQKVTISCSGSSSNIGNNYVSWYQQLPGTAPKILIYDNNKRPS
GISDRFSGSKSGTSATLGITGLQTGDEADYYCGTWDSSLSA
>V107RF-AJFE01022795.1-iglv |(18504, 18811)|1.97728255563|(0.647,0.688,0.649)|-1
SVVQAGLTQPPSVSKGLRQTATLTCTGNSNNVGNQGAAWLQQHQGHPPKLLSYRNNNRPS
GISERFSASRSGNTASLTITGLQPEDEAEYYCSAWDSSLS
>V108RF-AJFE01022796.1-igkv |(38920, 39226)|1.89250883253|(0.645,0.589,0.900)|-1
SLSQPVLTQSSSASASLGSSVKLTCTLSSGHSSYIIAWHQQQPGKAPRYLMKLEGSGSYN
KGSGVPDRFSGSSSGADRYLTISNLQSEDEADYYCETWDS
>V109RF-AJFE01022796.1-iglv |(57629, 57936)|2.97554104219|(0.998,0.979,1.000)|-1
SWANFMLTQPHSVSESLGQTVTISCPRSSGSIASNYVQWYQQRPGSAPTTVIYEDNRRPS
GVPDRFSGSIDRSSNSASLTISGLKSEDEADYYCQSYDSS
>V110RF-AJFE01022798.1-iglv |(2606, 2906)|2.98782001102|(0.999,0.993,0.996)|-1
SLSQLVLTQSPSASASLGASVKLTCTLSSGHSSYAIAWHQQQPEKGPRYLMKLNSDGSHS
KGDGIPDRFSGSSSGAERYLTISSLQSEDEADYYCQTW
>V111RF-AJFE01022798.1-iglv |(70777, 71086)|2.9898400105|(0.998,1.000,0.992)|-1
VDSQTVVTQEPPFSVSPGGTVTLTCGLSSGSVSTSYYPSWYQQTPGQAPRTLIYSTNTRS
SGVPGRFFGSIIGNKAALTITGAQADDESDYYCLLYMGSGI
>V112RF-AJFE01024275.1-trav |(11529, 11815)|1.82424215008|(0.607,0.570,0.667)|-1
VSAARNEVEQSPQDLTAQEGELITINCSYSVGINALHWLQQHPGGGIVSLFMLSSGKKKH
GRLIATINIQEKHSSLHITASHPRDSAIYICAV
>V113RF-AJFE01024276.1-trav |(19317, 19607)|3.0|(1.000,1.000,1.000)|-1
VSSEDKVVQSPLSLVVHEGDTVTLNCSYEVTNFQSLLWYKQEKKAPTFLFMLTSSGIEKK
SGRLSSILDKKELFSILNITATQTGDSAIYLCAVE
>V114RF-AJFE01024276.1-trav |(73725, 74027)|3.0|(1.000,1.000,1.000)|-1
FSMAQTVTQSQPEMSVQEAETVTLSCTYDTSESDYYLFWYKQPPSRQMILVIRQEAYKQQ
NATENRFSVNFQKAAKSFSLKISDSQLGDAAMYFCAYRS
>V115RF-AJFE01024276.1-trav |(95666, 95954)|2.99199600001|(0.997,0.997,0.998)|-1
LSGELKVEQSPLFLSTQEGKNYTIYCNYSTTSDRLYWYRQDPGKSLESLFVLLSNGAVKQ
EGQLMASLDTKARLSTLHITAAVHDLSATYFCAV
>V116RF-AJFE01045431.1-ighv |(1008, 1322)|1.69489642175|(0.900,0.765,0.527)|-1
VLSQVTLKESGPTLVKPTQTLTLTCTFSGFSLSTSGVGVGWIRQPPGKALEWLALIYSDN
DKRYSPSLKSRLTITKDTSKNQVVLTMTNMDPVDTATYYCAHR
>V117RF-AJFE01045439.1-ighv |(4672, 4981)|3.0|(1.000,1.000,1.000)|-1
VQCEVQLVESGGGLVQPGGSLTLSCAASGFTFSSYWMSWVRQAPGKGLEWVANIKKDGSE
KYYADSVKGRFTISRDNAKNSLYLQMNSLRAEDTAVYYCAT
>V118RF-AJFE01045444.1-ighv |(1979, 2288)|2.99899600001|(1.000,1.000,0.999)|-1
AHSQVQLVQSGAEVKKPGASVKVSCKASGYTFTSYDINWVRQATGQGLEWMGWMNPNSGN
TGYAQKFQGRVTMTRDTSISTAYMELSSLRSEDTAVYYCAR
>V119RF-AJFE01045447.1-ighv |(71, 380)|2.99899600001|(1.000,1.000,0.999)|-1
VQCEVQLVESGGGVVQPGRSLRLSCAASGFTFSNYAMHWVRQAPGKGLEWVSVISSSGSY
IYYADSVKGRFTISRDNAKNSLYLQMNSLRAEDTALYYCAK
>V120RF-AJFE01045453.1-ighv |(639, 948)|2.99899600001|(1.000,1.000,0.999)|-1
VQCQVQLVESGGGLVKPGGSLRLSCAASGFTFSNHYMSWIRQAPGKGLEWVSYISYDSSY
INYADSVKGRFTISRDNAKNSLYLQMNSLRAEDTAVYYCAR
>V121RF-AJFE01047586.1-igkv |(1119, 1419)|3.0|(1.000,1.000,1.000)|-1
TRCDIQMTQSPSSLSASVGDRVTITCRASQGISNYLAWYQQKPGKAPKLLIYYASRLESG
VPSRFSGSGSGTDYTLTISSLQPEDFATYYCQQYNSNP
>V122RF-AJFE01070459.1-trbv |(7045, 7343)|2.51754920221|(0.992,0.992,0.747)|-1
SMDADVTQTPRNRITKTGKRIMLECSQTKGHDRMYWYRQDPGLGLRLIYYSFDVKDINKG
EISDGYSVSRQAQAKFSLSLESAIPNQTALYFCATSD
>V123RF-AJFE01070459.1-trbv |(21089, 21386)|2.99899600001|(1.000,0.999,1.000)|-1
LMEADIYQTPRYLVIGTGKKITLECSQTMGHDKMYWYQQDPGMELHLIHYSYGVNSTEKG
DLSSESTVSRIRTEHFPLTLESARPSHTSQYLCASSE
>V124RF-AJFE01070459.1-trbv |(65610, 65907)|2.10085069959|(0.926,0.593,0.941)|-1
PLEAQVTQNPRYLITVTGKKLTVTCFQNMNHEYMSWYRQDPGLGLRQIYYSINVEAIEKG
DVPEGYNVSRKEKRNFPLILESPSPNQTSLYFCASSL
>V125RF-AJFE01070459.1-trbv |(70897, 71194)|2.99698000014|(1.000,0.999,0.998)|-1
LVDVKVTQSSRYLVKRMGEKVFLECVQDMDHENMFWYRQDPGLGLRLIYFSSDVKMKEKG
DIPEGYSVSREKKERFSLILESASTNQTSMYLCASSI
>V126RF-AJFE01070459.1-trbv |(89682, 89985)|2.90740376074|(0.991,0.937,0.991)|-1
SVFSAVISQKPSRDICQRGTSLTIQCQVDSQVTMMFWYRQQPGQSPTLIATANQGSEATY
ETGFVIDKFPISRPNLTFSTLTVSNMSPEDSSIYLCSVE
>V127RF-AJFE01070460.1-trbv |(14989, 15285)|2.30495800815|(0.966,0.668,0.970)|-1
LSNAGVMQNPRHLVRRRGQEARLRCSPVKGHNHVYWYRQLPEEGLKFMVYLQKENIIDES
GMPKERFSAEFPKEGPSILRIQQAVRGDSAAYFCASS
>V128RF-AJFE01070460.1-trbv |(18108, 18405)|3.0|(1.000,1.000,1.000)|-1
TVDGGITQSPKYLFRKEGQNVTLNCEQNLNHDAMYWYRQDPGQGLRLIYYSQIVNDFQKG
DIAEGYSVSREKKESFPLTVTSAQKNPTAFYLCASSI
>V129RF-AJFE01070460.1-trbv |(35929, 36229)|2.28257073671|(0.925,0.736,0.808)|-1
STDTKVTQRPRLLVKASEQKAKMDCVPIKGHSYVYWYRKKLEEELEFLVYFQNEELIQKA
EIINERFLAQCPKNSSCTLEIQSTESGDTALYFCASSK
>V130RF-AJFE01070460.1-trbv |(44986, 45286)|2.98989600501|(0.998,0.999,0.993)|-1
SFHAKVTQTPGHLVKGKGQKTKMDCTPEKGHVFVYWYQQNQNKEFMLLISFQNEQVLQET
EMHKTRFSSQCPKNTPCSLAILSSEPGDTALYLCASSQ
>V131RF-AJFE01070461.1-trbv |(12301, 12601)|2.36555753229|(0.880,0.954,0.689)|-1
LIDAGVTQTPRHKVTEMGQEVTMRCQPILGHNTVFWYRQTMMQGLELLAYFRNRAPLDDS
GMPKDRFSAEMLDATLATLKIQPSEPRDSAVYFCASGL
>V132RF-AJFE01070461.1-trbv |(19125, 19425)|2.96050267138|(0.998,0.991,0.974)|-1
HKEAGVTQFPSHSVIEKGQTVTLRCDPISGHDNLYWYRRVMGKEIKFLLHFVRESKQDES
GMPNNRFLAERTGGTYSTLKVQPAELEDSGVYFCASSQ
>V133RF-AJFE01070461.1-trbv |(29248, 29548)|2.99698000014|(0.998,0.999,1.000)|-1
SPGEEVTQTPKHLVRGEGQKAKLYCAPIKGHSYVFWYQQVLKKEFKFLISFQNENVFDKT
GMPKERFSAKCLSNSPCSLEIQATKLEDSAVYFCASSQ
>V134RF-AJFE01070462.1-trbv |(12014, 12314)|2.45325717519|(0.957,0.714,1.000)|-1
LIEAGVVQSPRYKIIEKKQPVAFWCNPISGHNTLYWYWQNLGQGPELLIRYENEEAVDDS
QLPKDRFSAERLKGVDSTLKIQPAELGDSAVYLCASSL
>V135RF-AJFE01070462.1-trbv |(17609, 17909)|3.0|(1.000,1.000,1.000)|-1
HTDAGVIQSPRHEVTEMGQEVTLRCKPISGHNSLFWYRQTMMQGLELLIYFNNNVPIDDS
GMPKDRFSAKMPNASFSTLKIQPSEPRDSAVYFCASSL
>V136RF-AJFE01070463.1-trbv |(1165, 1465)|2.98450011724|(0.998,1.000,0.987)|-1
HTGAGVSQTPSNKVTEKGKDVELRCDPISGHAALYWYRQSLGQGPEFLIYFRGTGAADDS
GLPNDRFFAVRPEGSVSTLKIQRTEQGDSAVYLCASSL
>V137RF-AJFE01070463.1-trbv |(5986, 6282)|2.05483283232|(0.911,0.602,0.867)|-1
PVEAGVTQSLTHLIKTRGQQVTLRCSPISGHSSVSWYQQALGQGHQFISEYANELRRSEG
NFPNRFSGRQFHDYCSEMNVSALELGDSALYLCARSL
>V138RF-AJFE01070463.1-trbv |(16689, 16977)|2.00219928117|(0.882,0.543,0.999)|-1
AEITQSPRHKITETGRQVTLVCHQTWNHNNMFWYRQDLGHGLRLIHYSYGVQDTNKGEVS
DGYSVSRSNTEDFPLTLESAASSQTSVYFCASSE
>V139RF-AJFE01070463.1-trbv |(24431, 24731)|2.99296000066|(0.999,0.996,0.998)|-1
LSEAEVAQSPRYKITEKSQAVAFWCDPISGHATLYWYRQILGQGPELLVQFQDESVVDDS
QLPKDRFSAERLKGVDSTLKIQPAELGDSAMYLCASSL
>V140RF-AJFE01070463.1-trbv |(41824, 42121)|1.90661950725|(0.916,0.507,0.998)|-1
HRDAGITQSPRHKITETGRQVTLMCHQTWSHSYMFWYRQDLGHGLRLIYYSAAADITDKG
EVPDGYVVSRSKTENFPLTLESATRSQTSVYFCASSE
>V141RF-AJFE01070463.1-trbv |(57682, 57982)|2.27206444302|(0.737,0.758,0.790)|-1
CTDAGIIQSPKHEVTEMGQTVTLRCEPIFGHNLLFWYRDTFVQGLELLSYFRSRSIIDNA
GMPTDRFSAERPDGSFSTLKIQPAEQGDSAVYVCASRL
>V142RF-AJFE01070463.1-trbv |(67763, 68060)|2.97606587284|(1.000,1.000,0.978)|-1
PVNGGVTQTPKFQVLKTGQSMTLQCAQDMNHDYMYWYRQDPGMGLRLIHYSAGAGITDKG
EVPNGYNVSRSNTEDFPLSLVSAAPSQTSVYFCASSY
>V143RF-AJFE01070463.1-trbv |(71976, 72276)|2.99899600001|(1.000,0.999,1.000)|-1
HTGAGVSQSPRYKVAKRGRDVALRCDSISGHVTLYWYRQTLGQGSEVLTYFRSDAQRDKS
GRPSGRFSAERPERSVSTLKIQRTEQGDSAVYLCASSL
>V144RF-AJFE01070463.1-trbv |(79903, 80199)|2.99293600205|(0.999,0.995,0.999)|-1
SVETGVTQSPTHLIKTRGQQVTLRCSPQSGHNTVSWYQQALGQGPQFIFQYYREEENGRG
NFSPRFSGRQFPNYSSELNVNALELDDSALYLCASSL
>V145RF-AJFE01070463.1-trbv |(86352, 86648)|2.99696400065|(1.000,0.997,1.000)|-1
NAGVTQTPKFRILKIGQSMTLQCAQDMNHNYMYWYRQDPGMGLKLIYYSVGAGITDKGEV
PNGYNVSRSTTEDFPLRLESAAPSQTSVYFCASSYST
>V146RF-AJFE01070463.1-trbv |(99363, 99659)|2.99385601037|(1.000,0.994,1.000)|-1
PVDAGVTQSPTHLIKTRGQHVTLRCSPISGHKSVSWYQQALGQGPQFIFEYYEKEERGRG
NFPDRFSARQFPNYSSELNVNALLLGDSALYLCASSL
>V147RF-AJFE01070463.1-trbv |(104634, 104931)|2.09437524763|(0.682,0.669,0.788)|-1
PMNAGVTQTPKFHVLKTGQSMTLLCAQDMNHEYMYRYRQDPGKGLRLIYYSVAAALTDKG
EVPNGYNVSRSNTEDFLLKLESAAPSQTSVYFCASSY
>V148RF-AJFE01070463.1-trbv |(108994, 109294)|2.9958720041|(0.996,1.000,1.000)|-1
HTGAGVSQSPRYKVTKRGQDVTLRCDPISGHVALYWYQQALGQGPEFLTYFNYEAQPDKS
GLPNDRFSAERPEGSNSTLTIQRTEQRDSAMYLCASNL
>V149RF-AJFE01070463.1-trbv |(116814, 117110)|2.98985201038|(0.999,0.993,0.998)|-1
SVDAGVTQSPIHLIKTRGQQVTLRCSPQSGHDTVSWYQQVLGQGPQCIFEYYEEEERQRG
NFPDRFSGHQFPNYSSELNVNALLLGDSALYLCASSL
>V150RF-AJFE01070463.1-trbv |(124111, 124405)|2.3677155727|(0.982,0.850,0.769)|-1
PVNAGVTQTPKFRILKTGQSMTLQCARDMNHGYMSWYRQDPGMGLRLIYYSAAAGTTDKE
VPNGYNVSRLNTEDFPLRLVSAAPSQTSVYFCASSY
>V151RF-AJFE01070463.1-trbv |(128406, 128706)|2.99696400065|(1.000,1.000,0.997)|-1
HTGAGVSQSPRYKVTKRGQDVTLRCDPISSHATLYWYQQALGQGPEFLTYFNYEAQPDKS
GLPNDRFSAERPEGSISTLTIQRTEQRDSAMYLCASSL
>V152RF-AJFE01070463.1-trbv |(136837, 137133)|2.99798400013|(1.000,0.998,1.000)|-1
PVDAGVTQSPTHLIKTRGQHVTLRCSPISGHTSVSWYQQALGQGPQFIFQYYEKEERGRG
NFPDRFSARQFPNYSSELNVNALLLGDSALYLCASSL
>V153RF-AJFE01070463.1-trbv |(144146, 144443)|2.9958720041|(0.996,1.000,1.000)|-1
PVNAVVTQTPKFQVLKTGQSMTLQCAQDMNHDCMSWYRQDPGMGLRRIHYSVAAGITDKG
EVPDGYNVSRSNKEDLPLRLESAAPSQTSVYFCASSY
>V154RF-AJFE01070463.1-trbv |(148806, 149106)|2.99499600001|(0.998,0.998,0.999)|-1
HTGAGVSQSPKYKVTKRGQDVALRCDPISGHVSLFWYQQALGQGPEFLTYFRNEAQLDKS
GLPSDRFFAERPEGSVSTLKIQRTQQEDSAVYLCASSL
>V155RF-AJFE01070463.1-trbv |(157011, 157307)|2.99298000014|(0.998,0.996,0.999)|-1
PVEAGVTQSPTHLIKTRGQQVTLRCSPISGHTSVYWYQQALGLGLQFLLWYDEGEERNRG
NFPRRFSGRQFPNYSSELNVNALELEDSALYLCASSL
>V156RF-AJFE01070463.1-trbv |(166234, 166534)|2.99594800078|(0.997,0.999,1.000)|-1
HADTGVSQDPSHKITKRGQNVTFRCDPISEHNRLYWYRQTLGQGPEFLTYFQNEAQLEKS
RLLSDRFSAERPKGSFSTLEIQHTEQGDSAIYLCASSL
>V157RF-AJFE01070463.1-trbv |(172755, 173052)|2.99288400513|(1.000,0.995,0.998)|-1
SVAAGVIQSPRYLIKEKRETATLKCYPIPRHDTVYWYQQGPGQDPQFLISFYEKMQSDKG
SIPDRFSAQQFSDYHSELNMSSLELGDSALYFCASSS
>V158RF-AJFE01070464.1-trbv |(8813, 9110)|3.0|(1.000,1.000,1.000)|-1
PLDTAVSQTPKYLVTQMGKKESLKCEQNLGHNAMYWYKQDSKKFLKTMFIYSNKEPILNE
TVPNRFSPDSPDKAHLNLHINSLELGDSAVYFCASSQ
>V159RF-AJFE01070464.1-trbv |(12266, 12563)|2.99799200002|(1.000,0.999,0.999)|-1
PMEMGVTQTPRHLVMGMTNKKSLKCEQHLGHNAMYWYKQSAKKPLELMFVYSLEERVENN
SVPSRFSPECPNSSHLFLHLHTLQPEDSALYLCASSQ
>V160RF-AJFE01070464.1-trbv |(20566, 20863)|2.99696400065|(1.000,1.000,0.997)|-1
PVNAGVTQTPKFRVLKTGQSMSLLCAQDMNHEYMYWYRQDPGMGLRLIHYSVGEGTTAEG
EVPDGYNVSRLKKQNFLLGLESAAPSQTSVYFCASSY
>V161RF-AJFE01070464.1-trbv |(52077, 52374)|2.99699200002|(0.999,0.998,1.000)|-1
PVIAGITQAPTSQILAAGRSMTLRCTQDMRHNAMYWYRQDLGLGLRLIHYSNTAGTTGKG
EVPDGYSVSRANTDDFPLTLASAVPSQTSVYFCASSD
>V162RF-AJFE01070465.1-trbv |(4903, 5200)|2.99899200002|(0.999,1.000,1.000)|-1
PVNAGVTQSPKFRVLKTGQSMTLQCAQDMNHNYMYWYRQDPGMGLRLIHYSAGEGTTAKG
EVPDGYNVSRLNTQNFLLRLESAAPSQTSVYFCATSE
>V163RF-AJFE01119867.1-ighv |(1662, 1971)|2.53797459541|(0.881,0.888,0.797)|-1
AQSRVQLAQSGAEVKKPGASVKVSCKASGYTFTSYRMHWVCQAHAQGLEWMGLVCPSDGS
TSHAQKFQGRVTITRDTSMSTAYMELSSLRSEDTAMYYCVR
>V164RF-AJFE01119883.1-ighv |(31777, 32092)|2.9939280013|(0.996,0.999,0.999)|-1
VQCEVQLVESGGGLVQPGGSLRLSCAASGFTFSDHYMSWVRQAQGKGLELVRLIRNKANS
YTTEYAASVKGRFTISREDSKNTLYLQMSSLKTEDLAVYYCAR
>V0RF-ABGA01025787.1-ighv |(2055, 2364)|2.9681802388|(0.996,0.990,0.983)|1
TYSQVQLVQSGHEVKQPGASVKVSCKDSGYSFTTYGMNWVQQAPEQGLEWMGWFNTDTGN
PTYAQGFTGRFVFSMDTSVSTAYLQISSLKAEDTAMYYCAR
>V1RF-ABGA01025787.1-ighv |(23079, 23369)|1.84850820126|(0.616,0.565,0.721)|1
EVKKPGESLRISCKTSGYSFTSYWIHWVRQVPEKELEWIGGIYPGNSDTRYSPSFQGHVT
ISADSSISTTYLQWSSLKASDTAMYYCVRQTIQNL
>V2RF-ABGA01025790.1-ighv |(836, 1151)|2.68226604529|(0.986,0.812,0.999)|1
VQCEVQLVESGGGLVQPGGSLRLSCAASGFTSSDYQMYWVRQASGKGPEWVGYIGSKSNS
YATAYAASVKGRFTISRDDSKNTLYLQMNSLKTEDMAVYYCAR
>V3RF-ABGA01025791.1-ighv |(3901, 4216)|3.0|(1.000,1.000,1.000)|1
VQCEVQLVESGGGLVQPGGSLRLSCAASGFTFSSYWMSWVRQAPGKGLEWVGFIKNKADG
GTTDYAASVKGRFTISRDDSKNTLYLQMNSLKTEDTAIYYCAR
>V4RF-ABGA01025791.1-ighv |(14222, 14536)|1.83991801166|(0.728,0.510,0.941)|1
VLSQVTLKESGPALVKPTQTLTLTCTFSGFSLSTSGIGVGWIRQPLGKAMEWLAHIYWTD
SKYYSSSLKSRLTISKDTSKSQVVLIMTSMDPVDTATYYCARI
>V5RF-ABGA01025797.1-ighv |(8415, 8724)|2.99599600001|(0.999,0.999,0.998)|1
VQCEVQLVESGGGLVQPGGSLRLSCVASGFTFSSYAMRWVHQAPGKGLEWVSAISGSGGS
TWYPDSVKGRFTISRDNAKNTLYLQMNSLRAEDTAVYYCVR
>V6RF-ABGA01025808.1-ighv |(3704, 4019)|2.99899600001|(1.000,0.999,1.000)|1
VQCEVQLVESGGGLVQPGGSLRLSCAASGFTFSSSAMHWVRQAPGKGLEWVGRIRSKANS
YATEYAASVKGRFTISRDDSKNTAYLQMNSLKTEDTALYYCTT
>V7RF-ABGA01025808.1-ighv |(11416, 11731)|2.99899200002|(0.999,1.000,1.000)|1
LQCEVQLVESGGGLVQPGGSLRLSCAASGFTFSDHYMDWVRQAPGKGLEWVARIRNKANS
YTTEYAASVKGRFTISRDDSKNTLYLQMSSLKTEDTAVYYCAR
>V8RF-ABGA01025808.1-ighv |(27673, 27982)|3.0|(1.000,1.000,1.000)|1
VQCEVQLVESGGGLVQPGGSLRLSCAASGFTFRDHYMNWVRQAPGKGLEWVSAISGSSSS
TYYADSVKGRFTISRDNAKNTLYLQMNSLRAEDTAVYYCVR
>V9RF-ABGA01025808.1-ighv |(39511, 39826)|3.0|(1.000,1.000,1.000)|1
VQCEVQLVESGGGLVQPGGSLRLSCAASGFTFSNYYMSWVRQAPGKGLEWEGFIKNKTNG
GTTEYAASVKGRFTISRDDSKSITYLQMSSLKTEDTAVYYCTR
>V10RF-ABGA01025808.1-ighv |(52101, 52413)|2.97596052424|(0.997,0.981,0.999)|1
VQCELQLVESRGDLVQPGGSLRLSCAASGFTFSSYGMNWVCQAPGKGLEWVSVISRSSGT
IHYADSMKGRFTISRDNAKNSLYLQMNNSLRAEDTAVYYCVK
>V11RF-ABGA01025808.1-ighv |(65728, 66037)|2.62235794071|(0.939,0.957,0.801)|1
VQSQVQLVQSGAEVKKPGSSVKISCKVSEDTFSSYAISWVQQAPGQGLEWMGGIIPVLGT
ADYAQKFQGRVTITADTSTSTAYMELSSLRSEDTAVYYCAT
>V12RF-ABGA01025810.1-ighv |(7175, 7481)|2.99899200002|(0.999,1.000,1.000)|1
VQCEVQLVESGGGLVQPGGSLRLSCAASGFTISSYDMHWVHQAPGKGLEWVSAISTGGGT
YYADSVKGRFTISRDNAKNTLYLQMNNLRAEDTAVYYCAK
>V13RF-ABGA01037228.1-ighv |(1414, 1723)|2.99494800078|(1.000,0.997,0.998)|1
VLSQVQLQESGPGLVKPSETLSLTCAVSGGSISSGYYWGWIRQPPGKGLEWIGSIYYSGS
TYYNPSLKSRVTISVDTSKNQFSLKLSSVTAEDTAVYYCAR
>V14RF-ABGA01044302.1-ighv |(5170, 5476)|2.99498000014|(0.998,0.997,1.000)|1
VLSQVQLQESGPGLVKPSETLSLTCAVSGGSISSYYWSWIQQPPGKGLEWIGYIYSSGST
NYNPSLKSRVTMSVDTSKNQFSLKLSSVTAADTAVYYCAR
>V15RF-ABGA01044302.1-ighv |(9977, 10286)|2.9669280013|(0.987,0.990,0.990)|1
AHSQVQLGQSGPQVKKPESSVKVSCKASGYTFTSSAMQWVRQAPGQGLEWIGWIIVGSGN
TNYAQKFQGRVTITRDTSTSTAYMELSSLRSEDTAVYYCAA
>V16RF-ABGA01044304.1-ighv |(6033, 6342)|2.99596000066|(1.000,0.997,0.999)|1
VLSQVQLQESGPGLVKPSETLSLTCAVSGGSISSGYYWGWIRQPPGKGLEWIGSIYYSGS
TYYNPSLKSRVTISVDTSKNQFSLKLSSVTAADTAVYYCAR
>V17RF-ABGA01044305.1-ighv |(3517, 3823)|2.99899600001|(1.000,1.000,0.999)|1
VLSQVQLQESGPGLVKPSETLSLTCAVSGGSISSYYWGWIRQPPGKGLEWIGYIYSSGST
NYNPSLKSRVTMSVDTSKNQFSLKLSSVTAADTAVYYCVR
>V18RF-ABGA01044306.1-ighv |(1052, 1358)|3.0|(1.000,1.000,1.000)|1
VLSQVQLQESGPGLVKPSETLSLTCAVSGGSISSNYWSWIRQPPGKGLEWIGYIYSSGST
YYNPSLKSRVTMSIDTSKNQFSLKLSSVTAADTAVYYCAR
>V19RF-ABGA01044306.1-ighv |(5855, 6164)|2.12558965548|(0.679,0.920,0.871)|1
AHSQVQLVQSGPEVKKPGSSVKVSFKSSGYTFTSSAMQWVQQAPGQGLEWIGWIIVGNGN
TNYAQKFQGRVTITRDMSTSTAYMELSSLRSEDMAEYYSAA
>V20RF-ABGA01044307.1-ighv |(456, 762)|3.0|(1.000,1.000,1.000)|1
VLSQVQLQESGPGLVKPSETLSLTCAVSGGSISSYYWSWIRQPPGKGLEWIGGIYSSGST
YYNPSLKSRVTISVDTSKNQFSLKLSSVTAADTAVYYCAR
>V21RF-ABGA01044310.1-ighv |(2823, 3129)|2.67845004263|(0.998,0.811,1.000)|1
VQCEVQLVESGGGLVQPGGSLRLSCAASGFTVSSSSMIWVRQAPGKGLEWVSYISSDGSA
YYTDSVKGRFTVSRDNSKNTLYLQMNSLRAEDTAVYYCAK
>V22RF-ABGA01044310.1-ighv |(11412, 11713)|1.66718037843|(0.682,0.586,0.527)|1
LVQPGGSLRLSFAASGFTFSSSWMHWVCQAPEKGLERVANIKCDGSEKYYADSVKGRLTI
SRDNAKNSLYLQMNSLRAEDMAVYYCVRDTVRGGQCEP
>V23RF-ABGA01044310.1-ighv |(19040, 19346)|2.36281903207|(0.963,0.965,0.691)|1
CAEVQLVQSGAEVKRPGESLRISCKTSGYSFTSNWISWVRQMPGKGLEWMGSIYPGDSDT
RYSPSFQGHVTISADKSISTAYLQWSSLKASDTAMYYCAK
>V24RF-ABGA01044313.1-ighv |(11041, 11356)|2.99899600001|(1.000,0.999,1.000)|1
VQCEVQLVESGGGLVHPGGSLRLSCTASGFTFGDYAMSWVRQAPGKGLEWVGFIRSKAYG
GTTEYAASVKGRFTISRDDSKSIAYLQMNSLKTEDTAVYYCAR
>V25RF-ABGA01044314.1-ighv |(13359, 13668)|2.46435240245|(0.995,0.724,1.000)|1
VQCEVQLVESGGGLVQPGGSLRLSCAASEFTFSSNDMSWVRQAPEKGLEWVSYISNSGRT
TYYADSVKGRFTISRDNAKNSLYLQMNSLRAEDTAVYYCVR
>V26RF-ABGA01044316.1-ighv |(14128, 14437)|2.56273801777|(0.864,0.807,0.915)|1
AHSQVQLVQSGAEVKRPGASVKVSCKASGYTFTSCYMYWVQQAPGQGLEWMGVINPSDGS
TSYAQKFQGRVTMTRDTSTSTVYMELSSLRSEDTAVYYYAR
>V27RF-ABGA01044319.1-ighv |(4092, 4401)|2.9939280013|(0.996,0.999,0.999)|1
VQCEVQLVESEGGLVQPGGSLRLSCAASGFTFDDYAMHWVRQAPGKGLKWVSGINWNGGS
TYYADSVKGRFTISRDNSKNSLYLQMNSLRAEDTALYYCAK
>V28RF-ABGA01058270.1-ighv |(14488, 14797)|2.92996799578|(0.988,0.994,0.953)|1
VLSQVQLQQWGPGLVKPSETLSLTCAVCGGSISSGYYWSWIRQPPGKGLEWIGYMHHSGS
TYYNPSLKSRVTMSVETSKNQFSLKLSSVTAADTAVYYCAR
>V29RF-ABGA01058270.1-ighv |(28194, 28503)|2.96988400513|(0.991,0.993,0.986)|1
VQCEVQLVESGGGLVQSRGSLRFSCAASGFTFSSCGMNWVRQAPGKGLEWVAIIWYDGSN
KYYADSVKGRFTISRDNSKNMLYLQMNSLRVEDMAVYYCAK
>V30RF-ABGA01058270.1-ighv |(38768, 39077)|2.976900005|(0.994,0.989,0.994)|1
VLSQVRLQESGPGLVKPSETLSLTCAVSVDSISSGYYWSWIRQPPGKGLEWIGYIHHSGS
TYYNPSLKSRVTMSVDTSKNQFSLKLSSVTAADMAVYYCAT
>V31RF-ABGA01058273.1-ighv |(621, 936)|2.99799600001|(0.999,0.999,1.000)|1
VQCDVQLVESGGGLVQPGGSLRLSCAASGFTFSDYYMSWVHQPPGKGLEWVGLIRNKANG
GTTEYAASVKGRFTISRDDSKSIAYLQMNSLKTEDTAVYYCTR
>V32RF-ABGA01091248.1-trbv |(6357, 6654)|2.21376216846|(0.715,0.947,0.962)|1
HMDAGITQSPRHKITETGTPVTLKCHQTENRRYMYWCRQDLGHGLRLIHYSYGVKDTDKG
EVSDGYSVSRSKTEDFLLTLESATRSQTSVYFCAISE
>V33RF-ABGA01091248.1-trbv |(17283, 17574)|2.30331742146|(0.983,0.720,0.882)|1
AGVAQSPRYKIIEKKQPVAFWCNPISGHNTLYWYRQNLGQGPELLIRYENEEAVDDSQLP
KDRFSAERLKGVDSTLKIQPAELGDSAVYLCASSL
>V34RF-ABGA01091248.1-trbv |(29358, 29658)|2.93880255864|(0.994,0.974,0.974)|1
HTDAGVIQSPRHEVTEMGKEVTLRCKPISGHEDLFWYRQTMMQGLELLIYFNNKAVMDDS
GMPKDRFSAKMPNASFSTLKIQPSEPRDSAVYFCASSL
>V35RF-ABGA01091248.1-trbv |(32661, 32961)|2.44333622415|(0.978,0.722,0.974)|1
HTDAGVIQSPRHEVTEMGKEVTLRCKPISGHDYLFWYRQTMMQRLELLIYFNNKAVMDDS
GMPKDRFSAKMPNASFSTLKIQPSEPRDSAVYFCASSL
>V36RF-ABGA01091249.1-trbv |(2283, 2583)|2.12620678569|(0.856,0.954,0.594)|1
LIDAGVTQTPRHKVTEMGQEVTMRCQPILGHNTVFWYRQTMMQGLELLAYFRNQAPLDDS
GMPKDRFSAEMPDATLATLKIQPSEPRDSAVYLCASGL
>V37RF-ABGA01091249.1-trbv |(9220, 9521)|2.45050041582|(0.971,0.927,0.745)|1
AGVTQFPSHSVIEKGQTVTLRCDPISGHDYLYWYRRVMGKEIKFLIYFVRESKQDESSMP
KNRFLAERTGGTYSTLKVQPAELEDSGVYFCASSQVTV
>V38RF-ABGA01091249.1-trbv |(14302, 14599)|2.96832422844|(0.994,0.981,0.994)|1
HGVAMVIQNPRYQVTQFGKPVTLSCSQNLNHNVMYWYQQKSSQAPKLLFHYYDKDFNNEA
DTPDNFQSRRPNTSFCFLDIRSPGLGDAAMYLCATSR
>V39RF-ABGA01091249.1-trbv |(19286, 19586)|2.89400384073|(0.990,0.980,0.936)|1
SPGEEVTQTPKHLVKGEGQEAKLYCAPIKGHSYVFWYQQVLKKEFKFLISFQNENVFDKT
GMPKERFSAKCLPNSPCSLEIQATKLEDSAVYFCASSQ
>V40RF-ABGA01091251.1-trbv |(2217, 2517)|2.04390358353|(0.935,0.806,0.648)|1
LSNAGVTQNPRHLVRRRGQEARLRCSPMKGHSYVYWYRQLPEEGLKFMVYLQKEKIIDES
GMPKERFSAEFPKEGPSILRIQQAVRGDSAAYFCASSP
>V41RF-ABGA01091252.1-trbv |(2503, 2800)|2.98379201242|(0.994,1.000,0.990)|1
TVDGGITQSPKYLFRKEGQNVTLSCEQNLNHDAMYWYRQDPGQGLRLIYYSGIVNDFQKG
DIAEGYSVSREKKESFPLTVTSAQKNPTAFYLCASSI
>V42RF-ABGA01091256.1-trbv |(1883, 2180)|2.05808636718|(0.924,0.803,0.649)|1
SMDTKVTQRPRLLVKANEQKAKMDCVPIKGHSYVYWYRKKPEEELKFLLYFQNEEIQKAE
IINERFSAQYPKNSSCTLEIQSTETGDMALYFCASSK
>V43RF-ABGA01091257.1-trbv |(2769, 3069)|2.96140068997|(0.997,0.981,0.985)|1
SFHARVTQTPGHLVKGKGQKTKMDCTPEKGHTFVYWYQQNQNKEFMLLISFQNKQVLQET
EMHKKRFSSQCPKNTPCSLATLSSEPGDTALYLCASSQ
>V44RF-ABGA01091257.1-trbv |(13504, 13802)|2.90790891268|(0.993,0.989,0.938)|1
SMDADVTQTPRNRITKTGKRIMLECSQTKGHDGMYWYRQDPGLGLRLIYYSFDVKDINKG
EISDGYSVSRRTQAKFSLSLESATPNQTALYFCATSD
>V45RF-ABGA01091260.1-trbv |(5031, 5328)|2.96766265282|(0.999,0.996,0.975)|1
LMEADIYQTPRHLVIGTGKKITLECSQTMGHDKMYWYQQDPGMELHLIHYSYGVNSTEKG
DLSSESTVSRIRMEHFPLTLESARPSHTSQYLCASSE
>V46RF-ABGA01091263.1-trbv |(8280, 8583)|2.95741612211|(0.988,0.993,0.977)|1
SVFSAVVSQKPSRDICQRGTSLTIQCQVDSQVTMMFWYRQQPGQSLTLIATANQGSEATY
ESGFVIDKFPISRPNLTFSTLTVSNMSPEDSGIYLCSVE
>V47RF-ABGA01099934.1-ighv |(8362, 8671)|2.53851320286|(1.000,0.997,0.755)|1
VLSQVQLQESGPGLVKPSETLSLTCAVSGGSISSGYYWGWIRQPPGKGLEWIGHINYGGS
TSYNPSLKSRVTLSVDTSKNQFSLKLSSVTAADTAVYYCAR
>V48RF-ABGA01099934.1-ighv |(21569, 21878)|2.61306568643|(0.833,0.903,0.948)|1
AHSHVQLVQSGDEVRKPGASVKVSCKASGYTFTNHNMDWVRQAPGQGFEWMGGINTNTGG
TSYAQTFQGRVIMTRDTSTNTAFMELSSLRSEDMTVYYCAR
>V49RF-ABGA01099935.1-ighv |(7135, 7459)|2.14370056636|(0.803,0.765,0.660)|1
AHSQVQLVQSEPEMKQPGASVKFSCKATGYTFTSYVMNWVRQAPGQGLEWVGWINTNTGN
PMYAQGFTGQFVFSMDTSVSTVYLQISSLKAEDMAVYYCLRDTVWK
>V50RF-ABGA01099938.1-ighv |(2861, 3183)|2.37788596786|(0.780,0.758,0.945)|1
VLSQVTLKESGPALVKPTETLTLTCTVSGFSLSNSKMGVSWIRQPPGKALEWLAHIFSND
EKSYSTSLKSRLTISKDTSKSQVVLTMTNMDPVDTATYYCTRRAQ
>V51RF-ABGA01099940.1-ighv |(16077, 16386)|2.98780001921|(0.998,0.999,0.991)|1
AHAEVQLVQSGAEVKKPGASVKFSCKVSGYTFTELSMHWVRQAPGKGLEWMGGFDPDDGE
TIYAQKFQGRVTMTEDTSTDTAYMELSSLRSEDTAMYYCAT
>V52RF-ABGA01099941.1-ighv |(996, 1308)|2.99798400013|(1.000,0.998,1.000)|1
VQCEVQLVESGGGLVQPGGSLRLSCAASGFTFTNYYLHWFRQAPGKGLEWVAYISSGSGG
STNYPDSVKGRFTISRDNAKNTLYLQMNSLRAEDTAVYYCAR
>V53RF-ABGA01099941.1-ighv |(12097, 12412)|2.98521630725|(1.000,1.000,0.986)|1
VQCEVQLVESGGGLVQPGGSLRLSCAASGFTFSNYYMHWVRQAPGKGLEWVGFIRTEAKG
GTTEYAASVKGRFTISRDDSKSIAYLQTNSLKTEDTAVYYCTR
>V54RF-ABGA01099945.1-ighv |(5584, 5899)|2.97308440501|(0.997,0.995,0.982)|1
VQCEVQLVESGGGLVQPGGSLRLSCAASGFTFSNAWLSWVRQAPGKGLEWVGRIKSKADG
GTTDYAAPVKGRFTISRDDSKNTLYLQMNSLKTEDTAVYYCAT
>V55RF-ABGA01099946.1-ighv |(22626, 22932)|3.0|(1.000,1.000,1.000)|1
VQCEVQLVESGGGLVQPGGSLRLSCAASGFTVSSYDMHWVRQAPGKGLEWVSAIDTDGDT
YYADSVKGRFTISRENAKNSLYLQMNSLRAKDTAVYYCAR
>V56RF-ABGA01099946.1-ighv |(36315, 36622)|2.99798400013|(1.000,1.000,0.998)|1
VQCEVQLVESGGGLVQPGRSLRLSCAASGITFSNQYMSWVRQATGKGLEWVSYISGDSSY
TSYADSVKGRFTISRDNAKNSLYLQMNSLRVEDTAVYYCV
>V57RF-ABGA01099947.1-ighv |(19776, 20085)|2.99899600001|(1.000,1.000,0.999)|1
VQCEVQLVESGGGLVQPGGSLRLSCAASGFTFSSYSMSWVRQAPGKGLEWVSAISGSGSS
TYYPDSVKGRFTISRDNAKNTLYLQMNSLRAEDMAVYYCVR
>V58RF-ABGA01099948.1-ighv |(6262, 6577)|2.98992000218|(0.996,1.000,0.994)|1
VQCEVQLVESGGGLVQPGGSLRLSCAASGFTFSNYYMHWVRQAPGKGLEWVGFIASKAYG
GTTEYAASVKGRFTISRDDSKSIVYLQMNSLKTEGTAVYYCTR
>V59RF-ABGA01099955.1-ighv |(3480, 3787)|2.554842897|(0.870,0.984,0.782)|1
VCAEVQLVQSGAEVKRPGESLRISCKGSGYSFTSYWISWVRQMPGKGLELMGIIDPSDSD
TRYSPSFQGHITISADKSISTAYLQWTSLKASDTAMYYCA
>V60RF-ABGA01099956.1-ighv |(15185, 15494)|3.0|(1.000,1.000,1.000)|1
VQCEVQLVESGGGLVQPGGSLRLSCAASGFTFSSYAMYWVRQAPGKGLEWVSAINSGGGS
TYYADSVKGRFTISRENAKNTLYLQMSSLRAEDTAVYYCAK
>V61RF-ABGA01104800.1-ighv |(1132, 1438)|2.99593600205|(1.000,1.000,0.996)|1
VLSQVQLQESGPGLVKPSETLSLTCAVSGGSISGYSWSWIRQPPGKGLEWIGSIHSSGST
YYNPSLKSRVTISADTSKNQFSLKLSSVTAADTAVYYCAR
>V62RF-ABGA01104801.1-ighv |(6863, 7169)|2.92979088874|(0.997,1.000,0.944)|1
VLSQVQLQESGPGLVKPSETLSLTCAVSGGSISSYYWSWIRQPPGKGLEWIGYIHSSGST
NSNPSLKSRVTMSVDTSKNQFSLKLSSVTAADTAVYYCAR
>V63RF-ABGA01129113.1-trbv |(1435, 1735)|2.94217355698|(0.987,0.991,0.966)|1
HTGAGVSQSPRYKVAKRGQDVALRCDSIFGHVTFYWYQQTLGQGPEVLTYFRSDAQRDKS
GLPSGRFSAERPEGSVSTMKIQHTEQGDSAVYLCASSL
>V64RF-ABGA01154382.1-igkv |(15548, 15866)|2.62234548143|(0.980,0.790,0.987)|1
AYGDIVMTQSPDSLAVSLGERITINCKSSQSVLYSSNNKNYLAWYQQKPGQAPKLLIYWA
STRQSGVPDRFSGSGSGTDFTFTISSLQAEDVAVYYCQQSYSAP
>V65RF-ABGA01154383.1-igkv |(2950, 3250)|2.30086119666|(0.848,0.705,0.828)|1
TRAETTLTQSPAFVSATPGDKVTISCKASQDIDDDMNWYQQKPGEAAIFIIQEATTLISG
IPPRFSGSGYGTDFTLTINNIESEDAAYYFCLQHDNFP
>V66RF-ABGA01154588.1-trav |(5719, 6028)|1.90989417942|(0.877,0.901,0.525)|1
TIMYLVIGTAGQSLEQPSEVTAVEGAIVQINCTYQTSGFYGLSWYQQHDGGAPTFLSYST
LDGLEERGHFSSFLSRSDSYGYLLLQELQMKDSASYFCAVR
>V67RF-ABGA01173923.1-trav |(675, 979)|1.85041817589|(0.841,0.868,0.506)|1
QNIDQPTEITAMEGAIVQINCTYQTSGFNGLFWYQQHAREAPTFLSYNVLDGLDEKGHVS
SFLSRSKGYSYLLLKELQMKDSASYLCAVRDTVTMRSLW
>V68RF-ABGA01174988.1-ighv |(27125, 27434)|2.99696400065|(1.000,0.997,1.000)|1
VQCEVQLVESGGGLVQSRGSLRLSCAASGFTFSSCGMNWVRQAPGKGLEWVAVIWYDGSN
KYYADSVKGRFTISRDNSKNMLYLQMNSLRVEDTAVYYCAK
>V69RF-ABGA01174994.1-ighv |(8215, 8524)|2.68510752777|(0.964,0.982,0.820)|1
AQSQVQLVQSGAEVKKPGASVKVSCKASGYTFTNYYMQWVQQAPGQGLEWMREFNTRNGN
TQYIQEFQGRVTITRDTSTSTAYMELSSLRSEDTAVYYCVR
>V70RF-ABGA01174995.1-ighv |(11362, 11671)|2.40051858706|(0.972,0.778,0.849)|1
AHAKVQLVQSGAEVKKPGASVKVSCKVSGYTLTRLSMHWVRQAPRKGLEWMGGFYPVDGE
TIYAQKFQGRVTMTEDTSTDTAYMEISSLRSEDTAVYYCAT
>V71RF-ABGA01174999.1-ighv |(1443, 1758)|3.0|(1.000,1.000,1.000)|1
VQCEVQLVESGGGLVQPGGSLRLSCAASGFTFSDYYMSWVHQPPGKGLEWVGLIRNKANG
GTTEYAASVKGRFTISRDDSKSIAYLQMNSLKTEDTAVYYCTR
>V72RF-ABGA01174999.1-ighv |(24157, 24466)|2.62267548029|(0.962,0.987,0.789)|1
VQCEVQLVESGGGLVQAGESLRLSCAASGFTFSSYRMNWVRQAPGKGLEWVSYISSDSSY
IYYADSVKVRFTISGDNAKNSMYLQMNNLRAKDTPVYYCVK
>V73RF-ABGA01194059.1-ighv |(3549, 3864)|2.9969280013|(0.997,1.000,1.000)|1
VQCEVQLVESGGGLVQPGGSLRLSCAASGFTFSNHYMQWVRQAPGKGLEWVGLIRNKADG
ETTDYAASVKGRVTISRDDSKSITYLQMSSLKTEDSAVYYCAR
>V74RF-ABGA01194064.1-ighv |(10045, 10354)|2.69848510638|(0.964,0.941,0.848)|1
VLSQVQLQESGPGLVKPLETLSLTCAVSGGSISSSNWWSWVRQPPGKGLEWIGEIYQSGS
TNYNPSLKSRVTISVDKSKNQFSLKLSSVTAADTAVYYCAR
>V75RF-ABGA01197604.1-igkv |(7602, 7920)|2.28084042541|(0.989,0.659,0.986)|1
SSGDIVMTQTPLSLPVTPGEPASISCRSSESLLDTDDEYTYLNWYLQKPGQSPQLLIYEV
SSQASGVPDRFSGSGSGTDFTLKISRVEAEDVGVYYCMQALQTP
>V76RF-ABGA01198108.1-igkv |(6191, 6491)|2.98898400013|(0.997,0.995,0.997)|1
ARCDIQMTQSPTSLSASIGDSVTSTCQASQSISNELAWYQQKPGKVPKLLIYRVSSLQMG
IPSRFSGSGSGTDFTLTITSLQPDDVATYYCQQEYSYP
>V77RF-ABGA01224584.1-trbv |(1799, 2106)|2.39318212177|(0.983,0.987,0.699)|1
LVDMKVTQSSRYLVKRMGEKVFLECVQDMDHERMFWYRQDPGLGLRLIYFSYDVKMKEQG
DVPEGYSVSREKKGHFSLILESASTNQTSMYLCASSLSTA
>V78RF-ABGA01239557.1-trav |(769, 1061)|1.61008402895|(0.516,0.628,0.814)|1
TLIDAKTTQPTSMDCTEGRAANLPCNHSTISGNEYVYWFRQIHSQGPQYLIHGLKNSETN
EMASLIITEDRKSSTLILPHATLRDTAVYYCIVRV
>V79RF-ABGA01243343.1-ighv |(9466, 9772)|2.43488316774|(0.869,0.720,0.974)|1
VLSQVQLQQWGAGLVKPSETLSLTCAVYGGSFSDYGWNWIRQPPGKGLEWIGYIVSSGRT
NYNPSLKSRVTMSVDTSKNQFSLKLSSVTAADTAVYYCAR
>V80RF-ABGA01243345.1-ighv |(15320, 15629)|2.99798400013|(1.000,1.000,0.998)|1
VQCEVQLVESGGGLVQPGGSLRLSCAASGFTFSSYGMHWVRQAPGKGLEWVAVIWYDGSN
KYYADSVKGRFTISRDNSKNTLYLQMNSLRVEDTAVYYCAK
>V81RF-ABGA01276890.1-trbv |(7515, 7815)|2.66421784212|(0.965,0.982,0.810)|1
LTEAGVAQSPRYKIIEKRQSVAFWCNPISGHATLYWYQQILGQGPKLLIQFQNDGVVDDS
QLPKDRFSAERLKGVDSTLKIQPANLGDSAVYLCASSL
>V82RF-ABGA01285645.1-igkv |(2124, 2410)|2.84233632021|(0.988,0.905,0.977)|1
IVMMQSPATLSVSPGERGTISCRASQSVSNYLAWYQQKPGQSPRLLIYRASNRATGIPAR
FSGSGSGTDFTLTISSVELEDFAVYYCQQYNAG
>V83RF-ABGA01285648.1-igkv |(32619, 32919)|2.99798400013|(1.000,0.998,1.000)|1
ARCDIQMTQSPSSVSASVGDRVTITCRASQGISSALAWYQQKPGKPAKLLIYAASSLQSG
VPSRFSGSGSGTDYTLTISSLQPEDFATYYCQQYNSVP
>V84RF-ABGA01285649.1-igkv |(12602, 12902)|2.98598000014|(0.995,0.997,0.994)|1
ARCDIQMTQSPSSLSASVGDRVTITCRASQGISDDLAWHQQKPGKAPKLLIYAASSLQSG
VPSRFSGSESGTEFTLTISSLQPEDFATYYCQQYNSYP
>V85RF-ABGA01285651.1-igkv |(14331, 14619)|2.75395116666|(0.985,0.998,0.846)|1
IVMTQSPATLSLSPGERATISCRASQSVSNYLAWYQQKPGQAPRLLIHSASTRATGIPAR
FSGSGSGTDFTLTISSLEPEDFAVYYCQQGNNLP
>V86RF-ABGA01290070.1-igkv |(266, 566)|2.94276838753|(0.995,0.963,0.989)|1
TTGEVVLTQSPATLSLSPGERATLSCRASQSVSNYLAWYQQKPGQAPRLLIYDASNRATG
IPARFSGSGSGTDFTLTISSLEPEDFAVYYCQQRSNLP
>V87RF-ABGA01290201.1-trgv |(6850, 7160)|2.16301162943|(0.912,0.684,0.802)|1
SQISSNLEGRTKSVTGPTGSSAEITCDLPGASTLYIHWYLYQEGKAPQRLLYYEPYYFRV
VLESGITPGKYDTGSTRSSWNLRLQNLIENDSGVYYCATWD
>V88RF-ABGA01290201.1-trgv |(11173, 11486)|2.97014531208|(1.000,0.980,0.992)|1
SQKSSNLEGRTKSVTRPTGSSAEITCDLPGESTVYIHWYLHQEGKAPQRLLYYDSYNSRV
VLESGISPGKYDTYGSTRKNLRLILRNLIENDSGVYYCAIWD
>V89RF-ABGA01290201.1-trgv |(15529, 15842)|2.95838667423|(0.999,0.999,0.965)|1
SQKSSNLEGGTKSVTRPTRSSAEITCDLTVTNAFYIHWYLHQEGKAPQRLLYYDVSNSRD
VLESGLGPGKYYTHTPRWWSWILILRNLIENDSGVYYCATWY
>V90RF-ABGA01290202.1-trgv |(2218, 2531)|2.96786491212|(1.000,0.999,0.972)|1
SQKSSNLEGGTKSVTRPTRSSAEITCDLTVTNAFYIHWYLHQEGKAPQRLLYYDVSTARD
VLESGLSPGKYYTHTPRRWSWILRLQNLIENDSGVYYCATWD
>V91RF-ABGA01290204.1-trgv |(7449, 7762)|2.19752758973|(0.931,0.694,0.821)|1
SQKSSNLEGRTKSVTRPTGSLAVITCDLPVEDAAYIHWYLHQEGKAPQRLLYYDVSTSKV
VLESGISPGKYQTYASTRRSFRFILENLIEHDSGVYYCATWD
>V92RF-ABGA01297342.1-iglv |(5546, 5856)|1.92452685543|(0.904,0.531,0.917)|1
SLSQPVPTEPSSHSASSGASARLTCTLSSGFSVGDFWISWYQQKPGNPPRYLLYYHSDSD
KGQGSGVPSRFSGSNDASANAGILRISGLQPEDEADYYCGT
>V93RF-ABGA01301078.1-trbv |(8868, 9168)|2.97639727933|(0.999,1.000,0.979)|1
HTGAGVSQSPRYKVTKRGQDVALRCDPISGHDYLYWYQQALGQGPEFLTYFQNDVQLDKS
GMPSDRFSAEGLEGSISTLKIQRTEQGDSAVYLCASSL
>V94RF-ABGA01301081.1-trbv |(710, 1000)|1.99189440369|(0.963,0.786,0.663)|1
ETGVTQSPTYLIKTRGQQVTLRCSPISGHKSVSWYQQALGQGPQFIFQYYREEENGRGNF
PRRFSGHQFLNHSSELNVNALELEDSALYLCASSL
>V95RF-ABGA01301082.1-trbv |(3712, 4002)|2.16242439863|(0.932,0.786,0.708)|1
ETGVTQSPTYLIKTRGQQVTLRCSPISGHKSVSWYQQALGQGPQFIFQYYREEENGRGNF
PHRFSGHQFLNHTSELNVNALELDDSALYLCASSL
>V96RF-ABGA01301083.1-trbv |(1589, 1880)|2.99294800078|(0.996,0.999,0.998)|1
NAGVTQTPKFRILKTGQSMTLQCAQDMNHNYMYWYRRDPGMGLKLIYYLVAAGTTDKGEV
PDGYSVSRSTTEDFPLTLESAAPSQTSVYFCASSY
>V97RF-ABGA01301086.1-trbv |(3670, 3966)|2.99798400013|(1.000,0.998,1.000)|1
PVDAGVTQSPTHLIKTRGQQVTLRCSPISGHKSVSWYQQALGQGPQFIFEYYEKEERGRG
NFPDRFSARQFPNYSSELNVNALLLGDSALYLCASSL
>V98RF-ABGA01301086.1-trbv |(10960, 11257)|2.97096034001|(0.998,0.984,0.990)|1
PMNAGVTQTPKFQVLKTGQSMTLQCAQDMNHDYMSWYRQDPGIGLRLIHYSVAAGITEKG
ETPSGYNVSRSNTEDFPLRLESAAPSQTSVYFCASSY
>V99RF-ABGA01301086.1-trbv |(15590, 15890)|2.96485201038|(0.990,0.991,0.984)|1
HTGAGVSQSPRYKVTKRGQDVALRCDPISGHVSLFWYQQALGQGPELLTYFQNEVQLHKS
GLPSDRFFAERPEGSICTLKIQRTQQEDSAMYLCASSL
>V100RF-ABGA01313761.1-ighv |(1090, 1396)|3.0|(1.000,1.000,1.000)|1
VLSQVQLQESGPGLVKPSETLSLTCAVSGGSISGYYWSWIRQPPGKGLEWIGYIYSSGST
NYNPSLKSRVTVSVDTSKNQFSLKLSSVTAADTAVYYCAR
>V101RF-ABGA01313763.1-ighv |(465, 774)|2.9669280013|(0.987,0.990,0.990)|1
AHSQVQLGQSGPQVKKPESSVKVSCKASGYTFTSSAMQWVRQAPGQGLEWIGWIIVGSGN
TNYAQKFQGRVTITRDTSTSTAYMELSSLRSEDTAVYYCAA
>V102RF-ABGA01313764.1-ighv |(1353, 1662)|2.80310370387|(0.990,0.881,0.979)|1
VLSQVQLQESGPGLVKPSETLSLTCAVSGGSISSSYYWGWIRQPTGKGLEWIGHIYSSGS
TYYNPSLKSRVTISVDTSKNQFSLKLSSVTAEDTAVYYCAR
>V103RF-ABGA01318850.1-igkv |(776, 1076)|2.99899600001|(1.000,0.999,1.000)|1
SRCDIQMTQSPSSVSASVGDRVTITCQASQGVSNALAWYQQKPGKTPKLLIYDATTLQSG
VPSRFSGSGSGTDYTLTISSLQPEDFATYYCQQYNSYP
>V104RF-ABGA01321409.1-igkv |(1894, 2185)|3.0|(1.000,1.000,1.000)|1
DIQMTQSPSSVSASVGDRVTITCRASQSISSWLAWYQQKPGKAPKLLIYKASNLQSGVPS
RFSGSGSGTDFTLTISSLQPEDFATYYCQQYSSTP
>V105RF-ABGA01321410.1-igkv |(12114, 12400)|2.94643621385|(1.000,0.987,0.965)|1
IVMTQSPATLSVSPGERGTISCRASQSVSNYLAWYQQKPGQSPRLLIYRASNRATGIPAR
FSGSGSGTDFTLTISSVEPEDFAVYYCQQYNTG
>V106RF-ABGA01335280.1-iglv |(1203, 1509)|2.97280001921|(0.989,0.988,0.996)|1
DSQTVVTQEPSFSVSPGGTVTLTCGLSSGSVSTSYYPSWYQQTPGQALRMLIYSTNTRTS
GVPDCFSGSILGNKAALTITGAQADDESDYYCVLYMGSGI
>V107RF-ABGA01342015.1-igkv |(1575, 1875)|2.99798400013|(1.000,1.000,0.998)|1
TRCDIQMTQSPSSLSASVGDRVTITCRASQSISNYLAWYQQKPGKVPKLLIYAASTLQSG
VPSRFSGSGSGTDFTLTISSLQPEDVATYYCQKHNSAP
>V108RF-ABGA01356721.1-igkv |(4236, 4536)|3.0|(1.000,1.000,1.000)|1
SRCDIQMTQSPSSLSASVGDRVTITCRASQSISSWLAWYQQKPGKAPKLLIYAASSLQSG
VPSRFSGSGSGTDFTLTISSLQPEDFATYYCQQHNSYP
>V109RF-ABGA01356722.1-igkv |(4085, 4385)|2.38831848316|(0.971,0.693,0.992)|1
SRCDIQMTQPPSSMSAYVGDRVTVNCQASQGISSWLAWYQQKPGKAPKLLIYKASSLQSG
VPSRFSGSGSGTDYTLTISSLRPEDFATYYCQQANGVP
>V110RF-ABGA01356724.1-igkv |(802, 1093)|2.99899200002|(0.999,1.000,1.000)|1
DIQMTQSPSSVSASVGDRVTITCRASQGISNYLNWYQQKPGKAPKLLIYAASSLQSGVPS
RFSGSGSGTDFTLTISSLQPEDFATYYCQHFNSYP
>V111RF-ABGA01356726.1-igkv |(7542, 7842)|2.99280401921|(1.000,0.993,1.000)|1
TTGEIVLTQSPATLSLSPGERATVSCRASQSVSNYLAWYQQKPGQSPRLLIYDASNRATG
IPARFSGSGSGTDFTLTISSLEPEDFAVYYCQQYNNQT
>V112RF-ABGA01356729.1-igkv |(273, 573)|2.99698000014|(1.000,0.999,0.998)|1
ARCDIQMTQSPSSVSASVGDRVTITCRASQGISSYLAWYQQKPGKAPKLLIYAASSLQSG
VPSRFSGSGSGTEFTLTISSLQPEDFATYYCMQHNSYP
>V113RF-ABGA01362157.1-ighv |(1861, 2165)|2.70226363924|(0.877,0.986,0.886)|1
CAEVQLVQSGAEVKRPGESLRISCKGSGYSFTSYWISWVRQMPGKGLELMGMIDPSDSDT
RYSQSFQGHITISADKSISTAYLQWTSLKASDTAMYYCA
>V114RF-ABGA01378070.1-trbv |(11166, 11457)|2.10202850089|(0.727,0.668,0.721)|1
LMEADIYQTPRHRVIRTGKKITLECSQTMGHDKRYWSRSRNGITPHPLFLWVNSTEKGDL
SSESTVSRIRIQHFPLTLESASPSHTSQYLCASSE
>V115RF-ABGA01384193.1-ighv |(10967, 11276)|2.99899600001|(1.000,1.000,0.999)|1
VQCEVQLVESGGGLVQPGGSLRLSCAASGFTFSSYGMNWVRQAPGKGLEWVSYISGDSSY
INYADSVKGRFTISRDNAKNSLYLRMNSLRAEDTAVYYCVK
>V116RF-ABGA01386446.1-trav |(520, 807)|3.0|(1.000,1.000,1.000)|1
VNSQQGEEDPQALSIQEGENATMNCSYKTSINNLQWYRQNSGRGLVHLILIRSNEREKHS
GRLRVTLDTSKKSSSLLITASRAADTASYFCATD
>V117RF-ABGA01386446.1-trav |(6159, 6450)|2.9828400105|(0.997,0.995,0.991)|1
RTNGDPVTQTEGPVTLPERAALTLNCTYQSSYSAFLFWYVQYLNKEPELLLRSSENQETD
SRGFQASHVKSDSSFHLEKPSVQLSDSAVYYCVLR
>V118RF-ABGA01386446.1-trdv |(9538, 9841)|2.97037212748|(0.992,0.998,0.981)|1
SSMAQKVTQAQAAISVVEKEEVTLDCVYETRDATYYLFWYKQPSSGELVFLIRQNSFNEQ
NEVNGRYSWNFQKSTSSFNLTITASQVMDSAVYFCALSE
>V119RF-ABGA01386449.1-trav |(5636, 5936)|1.62769282347|(0.750,0.580,0.552)|1
LSGEDQEKSPEALRLQEGESSSLNCSYTVSGLRGLFWYRQDPGKGPELLFFLYSAGEEKE
KERLKATLTKKESFLHITAPKPEDSATYLCAVQARCSP
>V120RF-ABGA01386453.1-trav |(7857, 8156)|1.91236995672|(0.735,0.542,0.966)|1
VSSKQEVTQIPGALSVPEGENLVLNCSFTDSAIYNLRWFRQDPGKGLTSLLFIQSSQREQ
TSGRLNASLDKSSGRSTLSIAASQPGDSATYLCAVRHS
>V121RF-ABGA01387831.1-trav |(4904, 5207)|2.96370048487|(0.990,0.975,1.000)|1
PGIAQKITQTLPAMFVQEKEAVTLDCTYDTSDQSYGLFWYKQPSSGEMILLIYQGSYDKQ
NATEGRYSLNFQKARKSANLVISASQLGDSAMYFCAMKE
>V122RF-ABGA01387833.1-trav |(6325, 6619)|2.97412824764|(0.985,0.992,0.998)|1
RTHGDSVTQMEGPVTLSEEAFLTINCTYTATGYPSLFWYVQYPGEGLQLLLKATKADDKG
SNKGFEATYHKETTSFHLEKDSVRESDSGVYFCALS
>V123RF-ABGA01387833.1-trav |(37695, 37988)|2.99298000014|(0.998,0.999,0.996)|1
VWCQQKEVEQNPGPLSVPEGAIASLNCTYSNSAFQYFMWYRQYSRKGPELLIYIYSSGNK
QDGRFTAQVDTSGKYMSLFIRDSQPSDSATYLCAMS
>V124RF-ABGA01394059.1-igkv |(7736, 8051)|2.58666682788|(0.996,0.918,0.817)|1
SSGDIVMTQSPLSLPVTPGEPASISCRSSQSLLHSNRYNYLNWYLQKPGQSPQLLIYLGS
NRASRVPDRFSGSGSGTDFTLKISRVEAEDVGVYYCTQTLQTP
>V125RF-ABGA01394062.1-igkv |(9765, 10067)|2.9791803079|(0.997,0.983,1.000)|1
SSAEIVMTQTPLSLSITPGEPASISCRSSQSLLHSDGNTYLHWYLQKPGQPPQLLIYEVS
NRFSGVPDRFSGSGSGTDFTLKISRVEAEDVGVYYCMQD
>V126RF-ABGA01394064.1-igkv |(17826, 18124)|1.95727347924|(0.992,0.536,0.994)|1
SRGEIVLTQSPAFRSETLKEKVTITCRASQSIGSRLHWYQQKPDQSPKLLIKYASQSISG
VPSRFSGSGSGTDFTLTINSLEAEDAATYYCQQGSSL
>V127RF-ABGA01394066.1-igkv |(10063, 10363)|2.94475367204|(0.993,0.972,0.982)|1
TTGEIVLTQSPATLSLSPGERATLSCRASQSVSNYLAWYQQKPGQVPRLLIYRASNRTTG
IPDRFSGSGSGTDFTLTISRLDPEDFAVYYCQQYGSSP
>V128RF-ABGA01394066.1-igkv |(40656, 40948)|2.22201297559|(0.990,0.635,0.993)|1
SRGDIVMTQSPAFLSVTPVEKVTITCQASEGISNYLNWYQQKPDQAPKLLIKYASQSISG
VPSRFSGSGSGTDFTFTISSLEAEDAATYYCQQGN
>V129RF-ABGA01394068.1-igkv |(3664, 3964)|3.0|(1.000,1.000,1.000)|1
SRCDIQMTQSPSSVSASVGDRVTITCRASQGISNYLAWYQQKPGKAPKLLIYYASSLQSG
VPSRFSGSGSGTDYTLTISSLQPEDFATYYCQQYNSYP
>V130RF-ABGA01394071.1-igkv |(1743, 2043)|2.99899200002|(0.999,1.000,1.000)|1
SRCDIQMTQSPSSLSASVGDRVTITCQASQGISNALAWYQQKPGKTTKLLIYRASSLQSG
VPSSFSGSGSGTDFTLTISSLQPEDFATYYCQQYYSDP
>V131RF-ABGA01394075.1-igkv |(3782, 4082)|2.96833728137|(0.998,0.978,0.994)|1
TTGEIVMTQSPATLSLSPRERATISCRASQSVSSNLAWYQQKPGQAPRLLIYGASNRATG
IPARFSGSGSGTDFTLTISSLEPEDFAVYYCQQYNNWP
>V132RF-ABGA01047585.1-trbv |(3005, 3305)|2.27817489325|(0.796,0.708,0.805)|-1
CFHAKVTQTPGYLVKGKGKKTKMYCTPEKGHTFVCWYQQNQNKEFMFLISFQNEQVLQET
EMHKKRFSSRCPKNPPCSLAILSLEPGDTALYLCASSP
>V133RF-ABGA01052527.1-trbv |(437, 737)|2.07751318374|(0.784,0.590,0.878)|-1
CFHAKVTQTPGYLVKGKGRKTKMYCTPAKGHTFVCWYQQNQNKEFMFLISFQNEQVLQET
EMHKKRFSSQCPKNPPCSLAILSLEPGDTALYLCASSP
>V134RF-ABGA01061552.1-trav |(1941, 2240)|2.06507753281|(0.917,0.785,0.661)|-1
VNGQQVMQIPQCQHVQEGEDFTTYCNSSIALSNIQWYKQRPGGHPVFLIQLVKSGEVKKQ
KRLTFQFGEAKKNSSLHITATQTTDVGTYFCAGHSAPQ
>V135RF-ABGA01061554.1-trav |(7774, 8077)|2.09003280232|(0.746,0.676,0.697)|-1
SSVAQQVTQAQSSVSMPVGKAVTLNCLYETSWWWSYYIFWYKQPPSKEMIFLIRQGSGEQ
NAKNGRYSVTFKEAAKSIALTISALQLEDSAKYFCAVWE
>V136RF-ABGA01083932.1-trav |(371, 664)|2.97226014987|(0.992,0.981,1.000)|-1
VSRGESVRPHLSTLGVQEGDNSVINCAYSDSASDYFIWYKQESGKGPQFIIDIRSNMDKR
QGQRVTVLLNKTVKHLSLQIAATQPGDSAVYFCAEN
>V137RF-ABGA01083934.1-trav |(495, 792)|2.98364403777|(0.999,0.991,0.994)|-1
GTRAQSVTQLDSHVSVSEGALVLLRCNYSSSVSPYLFWYVQYPNQGLQLLLKYTSGTTLV
KGINGFEAEFKKSETSFHLTKPSAHVSDTAQYFCAVS
>V138RF-ABGA01083937.1-trav |(4214, 4504)|2.994|(0.998,0.998,0.998)|-1
VNGENVEQHPSTLSVQEGDSSVIKCTYSDSASNYFPWYKQEVGKGPQFIIDIRSNMGEKK
DQRITVILNKTAKHFSLHITETQPGDSAVYFCAAS
>V139RF-ABGA01083938.1-trav |(4846, 5150)|2.04623822265|(0.901,0.640,0.791)|-1
TARAQSVTQPDIHITVSEGTSLELRCNYSYGATPSLFWYVQFPGQGLQLLLKYFSGETLV
QGIKSFEAEFKRSQSSFNLRKSSVHWSDAAEYFCAAGGA
>V140RF-ABGA01083939.1-trav |(4457, 4751)|2.99899600001|(1.000,1.000,0.999)|-1
GINGDSVVQTEGQVLLSEGDSLIVNCSYETTQYPSLFWYVQYPGEGPQLLLKAMKANDKG
RNKGFEATYRKETTSFHLEKDSVQESDSAVYFCALS
>V141RF-ABGA01083939.1-trav |(18067, 18360)|3.0|(1.000,1.000,1.000)|-1
GSGKNQVEQSPQSLIILEGKNCTLQCNYTVSPFSNLRWYKQDTGRGPVSLTIMTFSENTK
SNGRYTATLDADTKQSSLHITASQLSDSASYICVVS
>V142RF-ABGA01083939.1-trav |(34050, 34338)|2.98979201242|(1.000,0.994,0.996)|-1
VWSQQKEVEQDPGPFNVPEGATVAFNCTYSNSASQSFFWYRQDCRKEPKLLMSVYSSGNE
NGRFTAQLNRASQYISLLIRDSQLSDSATYLCAV
>V143RF-ABGA01083939.1-trav |(39521, 39818)|2.96950008499|(0.995,0.985,0.990)|-1
GTRAQSVTQLDSHVPVSEGTRVLLRCNYSSSYSPSLFWYVQHPNQGLQLLLKYLSGPTLV
KGINGFEAEFKKSETSFHLTKSSAHVSDAAEYFCAMS
>V144RF-ABGA01113129.1-trav |(4972, 5260)|2.97456408064|(0.994,0.984,0.997)|-1
VKSQKIEQNSEALNIQEGKTATLTCNYTNYSPTYLQWYRQDPGRGPVFLLLIRENEKEKR
KERLKVSFDTTLKQSLFHITASQPADSATYFCAL
>V145RF-ABGA01113130.1-trav |(6720, 7010)|2.98870803341|(1.000,0.997,0.992)|-1
MSRGEDVEQTLFLSVQEGDSSVINCTYTDSSSTYLYWYKQEPGAGLQLLTYIFSNMDLKQ
DQRLTVLLNKKDKHLSLRIADTQTGDSAIYFCAEH
>V146RF-ABGA01113133.1-trav |(15271, 15560)|2.95106440553|(0.990,0.975,0.987)|-1
QSVAQPEDEVTVAEGNPLTVKCTYSVSGNPYLFWYIQYPNEGLQFLLKYITGDNLVKGSY
GFEAEFNKSQTSFHLKKPSALVSDSALYFCAVRD
>V147RF-ABGA01132346.1-trgv |(695, 1008)|2.96507224753|(0.999,0.997,0.972)|-1
SQKSSNLEGGTKSVTRPTRSSAEITCDLTVTNALYIHWYLHQEGKAPQRLLYYDVSTARD
VLESGLSPGKYYTHTPRRWSWILRLQNLIENDSGVYYCATWD
>V148RF-ABGA01154384.1-igkv |(10732, 11047)|2.64719424734|(0.959,0.959,0.812)|-1
CNGDIVLTQSPASLAMSPGQRATITCRASESVSVLGMTNLIHWYQQKPGQPPKLLIYRAS
NKDTGVPARFSGSGSGTDFTLTINPVEADDAANYYCMQSKNFP
>V149RF-ABGA01154386.1-igkv |(10957, 11257)|2.93343797113|(0.997,0.998,0.948)|-1
ARCDIQMTQSPSSLSASVGDRVTITCRASQGISSWLAWYQQKPGKAPKPLIYKVSSLESG
IPSRFSGSESGTEFTLTISSLQPEDFATYYCQQYNSVP
>V150RF-ABGA01161530.1-igkv |(226, 526)|2.99799600001|(0.999,1.000,0.999)|-1
IRCDIQMTQSPSSLSASVGDRVTITCRASQGISNYLNWYQQKPGKAPKLLIYRASNLQTG
VPSGFSGSGSGTDFTLTISSLQPEDIATYYCQQYDNLP
>V151RF-ABGA01164369.1-igkv |(1745, 2045)|2.01806846011|(0.936,1.000,0.549)|-1
IRCDIQMTQSPSSLSASVGDRVTITCRASQGISNYLNWYQQKPGKAPKLLIYRASNLQTG
VPPRFSGSRSGTDFTLTISSLQPKDIATYYCQQYDNLP
>V152RF-ABGA01180641.1-igkv |(2646, 2946)|2.99799600001|(0.999,1.000,0.999)|-1
ARCDIQMTQSPSSVSASVGDRVTITCRASQSISSWLAWYQKKPGKAPKLLIYKASSLQSG
VPSRFSGSGSGTEFTLTISSLQPEDFATYYCTQHNSYS
>V153RF-ABGA01180644.1-igkv |(8050, 8350)|2.99899600001|(1.000,0.999,1.000)|-1
ARGDIQMTQSPSSLSASVGDRVTITCRASQSISSYLAWYQQKPGKAPKPLIYAASNLQSG
VPSRFSGSGSGTEFTLTISSLQPEDFATYYCQQYKSDP
>V154RF-ABGA01180644.1-igkv |(24182, 24473)|2.99398000014|(0.999,0.997,0.998)|-1
DIQMTQSPSSVSASVGDRVTISCRASQSISSWLAWYQKKPGKAPKLLIYKASSLQSGVPS
RFSGSGSGTEFTLTISSLQPEDFATYYCTQHNSYP
>V155RF-ABGA01199503.1-igkv |(3988, 4290)|2.67902954621|(0.969,0.851,0.922)|-1
SSGDVVMTQSPLSLPVTLGQPASISCRSSQSLVHSDGNTYLNWFQQRPGQPPRRLIYKVS
NRDSGVPDRFSGSGAGTDFTLKISRVEAEDVGVYYCMQG
>V156RF-ABGA01203420.1-ighv |(3238, 3560)|2.98557605748|(1.000,0.995,0.991)|-1
VQCEVQLVESGGGLVQPGGSLRLSCAASGFTVSSNEMSWIRQAPGKGLEWVSTISRGGST
YYTDSVKGRFTISRDNSKNTLYLQMNSLRVEDTAVYYCARDTVKG
>V157RF-ABGA01203422.1-ighv |(651, 957)|2.05455800256|(0.988,1.000,0.570)|-1
VLSQVQLQESGPGLVKPSETLSLTCAVSGGSISSNYWSWIRQPPGKGLEWIGHIHYGGSN
YLNPSLKSRVTISVDTSKNQFSLKLSSVTAADTAVYYCAR
>V158RF-ABGA01223433.1-trbv |(4452, 4749)|2.99194800078|(0.999,0.996,0.997)|-1
PVNAGVTQTPKFHVLKTGQSMTLQCAQDMNHDYMSWYRQDPGMGLRLIHYSAGAGITDKG
EVPNGYNVSRLNTEDFQLRLESAAPSQTSVYFCASSY
>V159RF-ABGA01225869.1-trbv |(7999, 8296)|2.9734040992|(0.997,0.987,0.990)|-1
PLEAQVTQNPRYLITVTGKKLKVTCSQNMNHEYMSWYRQDPGLGLRQIYYSMNVEVVDKG
DVPEGYNVSRKEKRNFPLILESPSPNQTSLYFCASSL
>V160RF-ABGA01225869.1-trbv |(13353, 13650)|2.38314133294|(0.984,0.991,0.694)|-1
LVDVKVTQSSRYLVKRMGEKVFLECVQDMDHERMFWYRQDPGLGLRLIYFSYDVKMKEQG
DVPEGYSVSREKKGHFSLILESASTNQTSMYLCASSL
>V161RF-ABGA01252206.1-iglv |(13174, 13484)|2.90036630143|(0.997,0.966,0.950)|-1
SWDQSALIQPPSMSGSPGQSVTISCTGTSSDVGGYNYVSWYQQHPGTAPKLMIYAVSNQP
SGVPNRFSGSKSGNTASLTISGLQAEDEADYYCSSYAGSNN
>V162RF-ABGA01252209.1-iglv |(753, 1069)|2.73464544952|(0.956,0.856,0.962)|-1
CVSPFPGSWAQSALIQPPSVSGSPGQSVTISCTGTSSNYVSWYQQHPGKAPKLMIYEVSK
RPSGVPDRFSGSKSGNTASLTISGLQAEDEADYYCSSYASSNN
>V163RF-ABGA01252210.1-iglv |(1732, 2028)|2.64813404735|(0.936,0.851,0.896)|-1
SVASYELTQPLSVSVAPGQTARITCGGNNIGSKAVQWYQQKPGQAPLLVIYSDSNRPSGI
PEQFSGSNLGNTATLTISGAQAGDEADYYCQVRDSST
>V164RF-ABGA01252215.1-iglv |(9236, 9539)|2.98450011724|(0.998,0.987,1.000)|-1
SEASYELTQPPSVSVSPGQTARITCSGDALPKKYAYWFQQKSGQAPVLVIYKDSKRPSGI
PERFSGSSSGTMATLTISGAQVEDEADYYCYSTDSSGNH
>V165RF-ABGA01252216.1-iglv |(11892, 12202)|2.71488045338|(0.988,0.875,0.920)|-1
SWAQSALTQPRSVSGSPGQSVTISCTGTSSDIGGYNAVSWHQQHPGKAPKLMIYDVSNRP
SGVPNRFSGSKSGNMASLTISGLQAEDEADYYCSSYAGSYT
>V166RF-ABGA01252218.1-iglv |(480, 780)|2.98221630725|(0.999,0.985,0.999)|-1
SVTSYELTQPHSVSVATAQTARITCGGNNIGSKAVHWYQQKPGQAPVLVIYDDSNQPSGI
PERFSGSNSGNTATLTISGAQAGDEADYYCQVWDSSKH
>V167RF-ABGA01252219.1-iglv |(2097, 2400)|2.99185201038|(0.999,1.000,0.993)|-1
SATSYELTQPPSVSVAPRQTARITCGGNNIGSKSVHWYQQKPGQAPVLVIYGDSNRPSGI
SERFSGSNSGNTATLTISRVEAGDEAVYYCQVWDSSSDY
>V168RF-ABGA01252219.1-iglv |(9992, 10295)|2.99699200002|(0.999,1.000,0.998)|-1
SATSYELTQPPSVSVAPRQTARITCGGNNIGSKSVHWYQQKPGQAPVLVIYGDSDRPSGI
SERFSGSNSGNTATLTISRVEAGDEAVYYCQVWDSSSDY
>V169RF-ABGA01252219.1-iglv |(17960, 18263)|2.96586891211|(0.999,0.971,0.999)|-1
SVVSSELTQDPAVSVTLGQTVKITCQGDSLRSYYASWYQQKPGQAPVLVIYGNNNRPSGI
PDRFSGASSGNTASLTITGAQAEDEADYYCNSWDGSGNH
>V170RF-ABGA01252219.1-iglv |(34167, 34477)|2.99698000014|(0.998,1.000,0.999)|-1
SWAQSALTQPPSVSGSPGQSITISCTGTSSDVGGYNYVSWYQQHPGTAPKLMIYDVSKRP
SGVPDRFSGSKSGNTASLTISGLQTEDEADYYCSSYRSGDT
>V171RF-ABGA01252219.1-iglv |(46613, 46923)|2.994|(0.998,0.998,0.998)|-1
SWAQSALTQPASVSGSPGQSITISCTGTSSDVGGYNYVSWYQQHPGKAPKLMIYDVSKRP
SGVPDRFSGSKSGNTASLTISGLQAEDEADYYCSSYRSGST
>V172RF-ABGA01252219.1-iglv |(70767, 71077)|2.98021230726|(0.998,0.999,0.984)|-1
SWAQSALTQPPSVSGSPGQSITISCTGTSSDIGGYNAVSWYQQHPGKAPKLMIYEVSKRP
SGVPDRFSGSKSGNTASLTISGLQAEDEADYYCSSYRSGGT
>V173RF-ABGA01252220.1-iglv |(4657, 4954)|2.52975274784|(0.974,0.808,0.884)|-1
SVDSYELTQPPSVSVSPGQTARITCSGDVLGENYADWYQQKPGQAPVLVIYKDSERPPGI
PERFSGSTSGNTTTLTISSVLTEDKADYYCLSGDEDN
>V174RF-ABGA01252221.1-iglv |(70213, 70518)|2.28007819894|(0.974,0.666,0.957)|-1
SEASYELTQPSSVSVSLGQTARITCSGDVLAKKYAQWFQQKPGQAPVLVIYKDSERPSGI
PERFSSSSSGTTVTLTISGAQVEDEADYYCYSGDDNNLTV
>V175RF-ABGA01252221.1-iglv |(89127, 89430)|2.20457294712|(0.985,0.625,1.000)|-1
FEASYELTQPHSVSVSPGQMARITCSGEELPENYAYWYQQKPGQSPVLVIYKDSERPSGI
PERFSGSSSGTTVTLTISGVQAEDEADYYCQSADSSGTY
>V176RF-ABGA01252241.1-iglv |(4150, 4460)|2.4671826891|(0.843,0.753,0.940)|-1
SLSQSMLTQPASLSASPGASASLTCTLRSDINVGTYRIYWYQQKPGSPPRYLLRYKSDSD
KHQGSGVPSRFSGSKDASANAGLLLISGLQSEDEAGYYCMI
>V177RF-ABGA01252241.1-iglv |(8984, 9293)|2.98080401921|(0.996,0.989,0.996)|-1
SWAQSVLTQPPSASGTPGQRVTISCSGSSSNIGSNYVYWYQQFPGMAPKHLIYDNNQQPS
GVPDRFSGSKSGTSASLAISGLRSKDEADYYCAAWDNSLSG
>V178RF-ABGA01252243.1-igkv |(11516, 11822)|1.95047816405|(0.663,0.603,0.900)|-1
SLSQPVLTQSSSASASLGSSVKLTCTLSSGHSSYAIAWHQQQPGKAPRYLMRLEGSGSYN
KGSGIPDRFSGSSSGADRYLTISNLQSEDEADYYCQTWDS
>V179RF-ABGA01252243.1-iglv |(44201, 44510)|2.98376801985|(0.998,0.991,0.995)|-1
SWAQSVLTRPPSVSAAPGQKVTISCSGSSSNIGNYAVSWYQQLPGTAPKLLIYENNKRPS
GISDRFSGSKSGTSATLGITGLQTGDEADYYCSAWDSSLSA
>V180RF-ABGA01252243.1-iglv |(49802, 50111)|2.98560004313|(1.000,0.994,0.992)|-1
SWAQSVLTQPPSASGTPGQRVTISCSGSSSNIGSNYVYWYQQFPGMAPKLLIYDNNQRPS
GVPDRFSGSKSGTSASLAISGLRSEDEADYYCAALDNSLSG
>V181RF-ABGA01252248.1-iglv |(2689, 2998)|2.27516007741|(0.817,0.688,0.836)|-1
SVVQAGLTQPPSVSKGLRQTATLTCTGNSNNVGNQGAAWLQQHQGHPPKLLSYRNNNRPS
GISERFSASRSGNTASLTITGLQPEDEADYYCSAWDSSLSA
>V182RF-ABGA01252248.1-iglv |(12457, 12769)|2.97121230726|(0.995,0.981,0.996)|-1
SWAEVVFTQPHSVSGSPGQTVTISCTRSSGSIDNRYVYWYQQRPGSAPTTVIYDDNQRPS
GVPDRFSGSIDSSSNSASLTISGLKSEDEADYYCQSANDSHN
>V183RF-ABGA01252249.1-iglv |(2028, 2335)|2.60202169148|(0.959,0.783,0.978)|-1
SWANFMLTQPHSVSGSVGQKVIISCTRSSGSIGSYYVQWYQQHSGSAPTTVINKDNQRPS
GVPDRFSGSIDSSSNSASLTISGLKTEDEADYYCQSYDSS
>V184RF-ABGA01257764.1-igkv |(287, 587)|2.46824573637|(0.991,0.725,0.999)|-1
ATCDIQMTQSPFSLSASVGDRVTITSRASQGITNELAWYQQKPGKAPKFLIYSASSLQTG
VTSRFSGSGSGTDYTLTISSLQPEDVATYYCQRDYNTP
>V185RF-ABGA01257764.1-igkv |(8367, 8682)|2.67877754921|(0.993,0.905,0.870)|-1
SSGDVVMTQTPLSLPVTPGEPASISCRSSQSLLHSDGNTYLDWYLQKPGQSPQLLIYRVS
NRASGVPDRFSGSGSGTDFTLKISRVEAEDVGVYYCMQATKTP
>V186RF-ABGA01257764.1-igkv |(15129, 15444)|2.07962017523|(0.975,0.589,0.965)|-1
TSGDIAMTQTPLSLPVTPGEPASVSCRSSQSLLHSDGNTYLDWYLQKPGQPPQLLIYMLS
YRASGVSDRFSGSGSGTDFTLKISRVEAEDVGVYYCMQALQAP
>V187RF-ABGA01257772.1-igkv |(3885, 4185)|2.99899600001|(1.000,0.999,1.000)|-1
ARCAIQMTQSPSSLSASVGDRVTITCRASQGISNELSWYQQKPGQAPTLLIYAASSLQSG
VPSRFSGSGSGTDFTLTISSLQPEDVATYYCLQDYTTP
>V188RF-ABGA01257777.1-igkv |(9241, 9556)|2.42895248839|(0.989,0.714,0.987)|-1
SSGDIVMTQTPLSLPVTLGQPASMSCRSSQSLLDSDGYTYLDWYLQKPGQSPQLLIYEVS
NRASGVPDRFSGSGSGTDFTLKISRVEAEDVGVYYCMQALQVP
>V189RF-ABGA01259417.1-trbv |(2271, 2571)|2.98782001102|(0.997,1.000,0.991)|-1
HADTGVSQDPRHKITKRGQNVTFRCDPISEHNRLYWYRQTLGQGPEFLTYFQNEAQQEKS
GLFSDQFSAERPKGSFSTLKIQRTEQGDSAMYLCASSL
>V190RF-ABGA01276916.1-igkv |(1327, 1627)|2.99899600001|(1.000,1.000,0.999)|-1
ARCDIQMTQSPSSVSASVGDRVTITCRASQSISSWLAWYQQKPGKAPKLLIYKASNLQSG
VPSRFSGSGSGTDFTLTISSLQPEDFATYYCIQHSSTP
>V191RF-ABGA01277799.1-trbv |(1145, 1442)|2.11405500887|(0.895,0.588,0.964)|-1
HRDAGITQSPRYKVTETGRQVTLTCHQTWSHSYMFWYRQDLGHGLRLIYYSTATGITDKG
EVPDGYIVSRSKTENFLLTLESATRSQTSVYFCASSE
>V192RF-ABGA01277800.1-trbv |(311, 608)|1.92082110564|(0.876,0.515,0.973)|-1
HRDAGITQSPRHKITETGRQVTLTCHQTWSHSYMFWYRQDLGHGLRLIHYSLGVPDTNKG
EVSDGYTVSRSKTEDFPLTLESAASSQTSVYFCASSE
>V193RF-ABGA01277802.1-trbv |(3406, 3702)|2.2651038276|(0.863,0.716,0.790)|-1
PVQAGVTQSPTHLIKMRGQQVTLRCSPFSGHTSVSWYQQSLGQGPQFIFEYANELRRSKG
NFPDRFSGRQFRDYHSEMNVSALELGDSALYLCASRL
>V194RF-ABGA01277802.1-trbv |(6147, 6443)|3.0|(1.000,1.000,1.000)|-1
PVDSGVTQTPKHLITATGQRVTLRCSPRSGDLSVYWYQQSLDQGLQFLIQYYNGEEREKG
NILERFSAQQFPDLHSELNLSSLELGDSALYFCASSV
>V195RF-ABGA01277803.1-trbv |(1353, 1650)|2.24617204078|(0.879,0.716,0.786)|-1
PVQAGVTQSPTHLIKMRGQQVTLRCSPFSGHTSVSWYQQSLGQGPQFIFEYANELRRSKG
NFPDRFSGRQFRDYHSEMNVSALELGDSALYLCASKV
>V196RF-ABGA01277806.1-trbv |(4577, 4874)|2.39175213741|(0.961,0.802,0.811)|-1
PVIAGITQAPRSQILAAGRSVTLRCTQDMRHNAMYWYRQDLGLGLRLIHYSNTAGTIGKG
EVPDGYSVSRANTDDFPLTLVSAIPSQTSVYFCASSD
>V197RF-ABGA01277808.1-trbv |(1866, 2166)|2.95787637781|(0.997,1.000,0.965)|-1
HTGAGVSQSPSNKVTEKGKDVELRCDPISGHTALYWYRQSLGQGLEFLIYFQGNSAPDES
GLPSDRFYAERSGGSISTLKIQHTQQEDSAMYLCASSL
>V198RF-ABGA01277809.1-trbv |(3151, 3448)|2.95763747374|(0.999,0.997,0.966)|-1
PLDTAVSQTPKYLVTQMGKKESLKCEQNLGHDAMYWYKQDSKKFLKIMFIYNNKEPILNE
TVPNRFSPNSPDKAHLQLHISSLELGDSAVYFCASSQ
>V199RF-ABGA01277809.1-trbv |(6593, 6890)|1.67807799469|(0.621,0.848,0.476)|-1
PMEMGVTQTPRHLVMGMTNKKSLKCEQDLGHNAMYWYKQSAEKPLELMFAYNLKEPTENN
SVPSRFLPECPNSSHLFLHLHALQPEDSALYLCTSSQ
>V200RF-ABGA01277809.1-trbv |(14738, 15029)|2.98880001921|(0.999,0.998,0.992)|-1
NAGVTQIPKFRVLKTGQSMTLQCAQDMNHDYMYWYRQDPGMGLRLIHYSAGEGTTTKGEV
PDGYNVSRLKKQNFLLGLESAAPSQTSVYFCASSY
[truncated: 51,213 more chars]
