# Supplementary material for: Iterative Variable Gene Discovery from Whole Genome Sequencing with a Bootstrapped Multiresolution Algorithm
Source: Comput Math Methods Med. 2019 Feb 11;2019:3780245. doi: 10.1155/2019/3780245 (PMC6388353; doi:10.1155/2019/3780245)
Supplement: Supplementary Materials — supp_materialsV2.pdf: this is an updated document, which includes new figures requested by the reviewer. sequences_alignments.zip: these are genome sequence files that are relevant for reproducing some of the results. [file 3780245.f1.zip › 3780245.f1/sequences_alignments/bstrp_iteration_2_r.dnd]

(
(
(
(
(
V31RF-CABD02136297.1-ighv:0.0123547
,
(
V117RF-AACZ03107095.1-ighv:0.00488761
,
V205RF-AACZ03173117.1-ighv:0.00488761
):0.00746713
):0.0385312
,
(
V121RF-CABD02117430.1-ighv:0.0384619
,
(
V111RF-ADFV01131948.1-ighv:0.0376885
,
(
(
V154RF-AACZ03171037.1-ighv:-0
,
V38RF-AJFE01045035.1-ighv:-0
):0.0246332
,
V50RF-ABGA01099938.1-ighv:0.0246332
):0.0130553
):0.000773441
):0.012424
):0.0544636
,
(
V19RF-JYKQ01005787.1-ighv:0.0792396
,
(
V20RF-JABR01071886.1-ighv:0.0656376
,
(
V191RF-AACZ03098103.1-ighv:0.0460595
,
(
V248RF-AQIA01066387.1-ighv:0.0343813
,
(
V107RF-ADFV01131940.1-ighv:0.0330375
,
(
V94RF-AACZ03097900.1-ighv:0.0238367
,
(
V21RF-AHZZ01069455.1-ighv:0.022545
,
(
V18RF-AHZZ01069453.1-ighv:0.00984269
,
V16RF-JYKQ01005777.1-ighv:0.00984269
):0.0127023
):0.00129175
):0.00920079
):0.00134373
):0.0116782
):0.0195781
):0.0136019
):0.02611
):2.48878
,
(
(
(
(
V13RF-JYKQ01005774.1-ighv:0.0309971
,
(
V235RF-AQIA01066362.1-ighv:-0
,
V239RF-AQIA01066369.1-ighv:-0
):0.0309971
):0.227882
,
(
(
V132RF-AQIB01153556.1-ighv:0.0715773
,
V7RF-JYKQ01005771.1-ighv:0.0715773
):0.192494
,
(
(
V10RF-JYKQ01005773.1-ighv:0.0421282
,
(
V136RF-AQIB01153561.1-ighv:0.0269823
,
(
(
V68RF-AHZZ01113072.1-ighv:0.0203681
,
V4RF-JYKQ01005763.1-ighv:0.0203681
):0
,
V186RF-AQIA01075862.1-ighv:0.0203681
):0.00661423
):0.0151458
):0.122594
,
(
(
V192RF-AQIB01086294.1-ighv:0.0259099
,
V75RF-JYKQ01067073.1-ighv:0.0259099
):0.167489
,
(
(
(
V129RF-CABD02117457.1-ighv:0.0101422
,
V107RF-AACZ03097912.1-ighv:0.0101422
):0.0723192
,
(
V90RF-JABR01035060.1-ighv:0.067915
,
(
V29RF-ABGA01058270.1-ighv:0.0151675
,
V68RF-ABGA01174988.1-ighv:0.0151675
):0.0527476
):0.0145463
):0.0650482
,
(
V72RF-ABGA01174999.1-ighv:0.184122
,
(
V122RF-ADFV01131961.1-ighv:0.171968
,
(
V82RF-JABR01004698.1-ighv:0.188867
,
(
V0RF-ABDC01047890.1-ighv:0.162063
,
(
V32RF-AQIA01007915.1-ighv:0.156329
,
(
V175RF-AHZZ01069458.1-ighv:0.127338
,
(
(
V101RF-AQIB01153501.1-ighv:0.058362
,
V126RF-JYKQ01245874.1-ighv:0.058362
):0.0760994
,
(
V10RF-ABGA01025808.1-ighv:0.133094
,
(
(
V117RF-AGCE01148188.1-ighv:0.0739152
,
(
V25RF-AHZZ01091599.1-ighv:0.0364292
,
V247RF-JYKQ01237599.1-ighv:0.0364292
):0.0374859
):0.0350466
,
(
V131RF-CABD02117467.1-ighv:0.112897
,
(
(
V66RF-AGCE01147875.1-ighv:0.067915
,
(
V55RF-JABR01091180.1-ighv:0.0475384
,
(
V116RF-AACZ03106490.1-ighv:-0
,
V1RF-AJFE01003265.1-ighv:-0
):0.0475384
):0.0203766
):0.0132151
,
(
V131RF-AQIB01153555.1-ighv:0.0817956
,
(
V11RF-AHZZ01064615.1-ighv:0.0609509
,
(
V5RF-ABGA01025797.1-ighv:0.0596283
,
V12RF-ABGA01025810.1-ighv:0.0596283
):0.00132257
):0.0208447
):-0.000665441
):0.0317667
):-0.003935
):0.0241326
):0.001367
):-0.0071234
):0.0289912
):0.00573386
):0.026804
):-0.0168986
):0.0121537
):-0.0366125
):0.0458891
):-0.0286763
):0.0993493
):-0.00519282
):1.03249
,
(
(
(
(
(
V6RF-ABDC01231272.1-ighv:0.00484029
,
V42RF-ABDC01373300.1-ighv:0.00484029
):0.055442
,
V11RF-ABDC01282063.1-ighv:0.0602823
):0.0568555
,
(
V192RF-AQIA01075868.1-ighv:0.120811
,
(
(
V116RF-ABDC01345814.1-ighv:0.0154805
,
V117RF-ABDC01345817.1-ighv:0.0154805
):0.0936418
,
(
(
V116RF-CABD02117398.1-ighv:0.0582376
,
(
(
V34RF-CABD02136430.1-ighv:-0
,
V148RF-CABD02136430.1-ighv:-0
):0.01795
,
(
V174RF-AACZ03179884.1-ighv:0.00503527
,
V204RF-AACZ03172650.1-ighv:0.00503527
):0.0129148
):0.0402875
):0.0380326
,
(
V79RF-JABR01004697.1-ighv:0.102747
,
(
(
V127RF-JYKQ01245874.1-ighv:0.0153224
,
V160RF-AQIA01075820.1-ighv:0.0153224
):0.0711598
,
(
V21RF-ABGA01044310.1-ighv:0.0840732
,
(
V52RF-ABGA01099941.1-ighv:0.0698552
,
(
(
V108RF-AQIB01153509.1-ighv:0.0253837
,
V130RF-JYKQ01245880.1-ighv:0.0253837
):0.0512519
,
(
V82RF-JZKE01255182.1-ighv:0.0796246
,
(
(
V114RF-ADFV01131951.1-ighv:0.0151675
,
V125RF-ADFV01131961.1-ighv:0.0151675
):0.0575391
,
(
V115RF-AQIB01153511.1-ighv:0.0670613
,
(
V41RF-AJFE01045037.1-ighv:0.0631219
,
(
V89RF-JZKE01278271.1-ighv:0.061072
,
(
V128RF-AQIB01153553.1-ighv:0.0569366
,
(
V137RF-CABD02117477.1-ighv:0.0414951
,
(
V57RF-ADFV01136793.1-ighv:0.0456821
,
(
V169RF-AQIA01075832.1-ighv:0.0312907
,
(
V43RF-JYKQ01041713.1-ighv:0.0246354
,
(
V212RF-AHZZ01096568.1-ighv:0.0231598
,
(
V176RF-AHZZ01069458.1-ighv:0.0153224
,
V244RF-AQIA01066387.1-ighv:0.0153224
):0.00783738
):0.00147566
):0.00665524
):0.0143915
):-0.00418703
):0.0154415
):0.00413541
):0.00204989
):0.00393948
):0.00564525
):0.00691802
):-0.00298902
):-0.00678039
):0.014218
):0.00240905
):0.0162651
):-0.00647711
):0.0128521
):0.0116889
):-0.00367345
):0.00887465
,
(
(
(
(
V91RF-JZKE01278273.1-ighv:0.0256441
,
V95RF-JZKE01278602.1-ighv:0.0256441
):0.0471873
,
(
V103RF-JZKE01278614.1-ighv:0.0531193
,
(
V94RF-JZKE01278602.1-ighv:0.0470928
,
(
V83RF-JZKE01278248.1-ighv:0.0410145
,
(
V81RF-JZKE01255181.1-ighv:0.0337132
,
(
V12RF-JZKE01244710.1-ighv:0.0309971
,
V96RF-JZKE01278605.1-ighv:0.0309971
):0.00271605
):0.00730135
):0.00607828
):0.00602645
):0.0197121
):0.0127877
,
(
V9RF-JZKE01244686.1-ighv:0.0874199
,
(
V84RF-JZKE01278249.1-ighv:0.0839251
,
(
V30RF-JZKE01255160.1-ighv:0.0757195
,
(
V13RF-JZKE01244715.1-ighv:0.0666728
,
(
V92RF-JZKE01278276.1-ighv:0.0510368
,
(
V102RF-JZKE01278611.1-ighv:0.0504544
,
(
V99RF-JZKE01278610.1-ighv:0.0440513
,
(
(
V75RF-JZKE01235368.1-ighv:0.0151675
,
V86RF-JZKE01278255.1-ighv:0.0151675
):0.0304088
,
(
V98RF-JZKE01278609.1-ighv:0.0421084
,
(
V88RF-JZKE01278268.1-ighv:0.0256441
,
V97RF-JZKE01278607.1-ighv:0.0256441
):0.0164644
):0.00346779
):-0.00152497
):0.00640318
):0.000582378
):0.015636
):0.0090467
):0.00820557
):0.00349478
):-0.00180075
):0.0405342
,
(
V2RF-ABGA01025790.1-ighv:0.144571
,
(
(
(
V11RF-JZKE01244709.1-ighv:0.0447404
,
(
V85RF-JZKE01278253.1-ighv:0.0364292
,
V101RF-JZKE01278611.1-ighv:0.0364292
):0.00831115
):0.0239207
,
(
V93RF-JZKE01278277.1-ighv:0.0475384
,
V100RF-JZKE01278610.1-ighv:0.0475384
):0.0211226
):0.0511692
,
(
(
(
V134RF-CABD02117471.1-ighv:0.0364292
,
V117RF-AJFE01045439.1-ighv:0.0364292
):0.0428803
,
(
(
V110RF-AACZ03098145.1-ighv:0.0309971
,
V113RF-AACZ03098176.1-ighv:0.0309971
):0.0166046
,
(
V80RF-ABGA01243345.1-ighv:0.0448245
,
(
V125RF-CABD02117442.1-ighv:0.0151675
,
V126RF-CABD02117444.1-ighv:0.0151675
):0.029657
):0.0027773
):0.0317077
):0.0147734
,
(
(
(
V252RF-AHZZ01125719.1-ighv:0.00503527
,
V166RF-AQIA01075827.1-ighv:0.00503527
):0.0682324
,
(
V120RF-AJFE01045453.1-ighv:0.0697461
,
(
V117RF-ADFV01131956.1-ighv:0.0544648
,
(
V115RF-ABGA01384193.1-ighv:0.047655
,
(
(
V199RF-AHZZ01090491.1-ighv:0.0151675
,
V198RF-JYKQ01062878.1-ighv:0.0151675
):0.0199339
,
(
V119RF-CABD02117420.1-ighv:0.0283206
,
(
V158RF-AACZ03171037.1-ighv:0.0151675
,
V42RF-AJFE01045041.1-ighv:0.0151675
):0.0131532
):0.00678074
):0.0125537
):0.00680973
):0.0152813
):0.00352157
):0.0193716
,
(
(
V87RF-JZKE01278267.1-ighv:0.0710611
,
(
V60RF-ABGA01099956.1-ighv:0.0379108
,
(
(
V23RF-AHZZ01069456.1-ighv:0.00498507
,
V21RF-JYKQ01005789.1-ighv:0.00498507
):0.0343648
,
(
V19RF-AHZZ01069455.1-ighv:0.0203681
,
V234RF-AQIA01066360.1-ighv:0.0203681
):0.0189817
):-0.00143903
):0.0331503
):0.0184014
,
(
(
(
V4RF-ABDC01231268.1-ighv:0.00503527
,
V134RF-ABDC01493416.1-ighv:0.00503527
):0.0547196
,
(
V43RF-ABDC01373301.1-ighv:0.0494828
,
(
V105RF-AQIB01153507.1-ighv:0.0364292
,
(
V143RF-CABD02117499.1-ighv:0.0309971
,
V163RF-AQIA01075825.1-ighv:0.0309971
):0.0054321
):0.0130536
):0.0102721
):0.0352863
,
(
V11RF-JABR01059011.1-ighv:0.100451
,
(
V67RF-AGCE01147944.1-ighv:0.064485
,
(
V70RF-AGCE01148057.1-ighv:0.0524497
,
(
V137RF-JABR01077916.1-ighv:0.0525519
,
(
V118RF-CABD02117419.1-ighv:0.0486808
,
(
(
V97RF-AACZ03097900.1-ighv:-0
,
V6RF-AJFE01011113.1-ighv:-0
):0.0299681
,
(
V140RF-CABD02117487.1-ighv:0.0127323
,
(
V96RF-AACZ03097900.1-ighv:0.00503527
,
(
V100RF-AACZ03097906.1-ighv:-0
,
V45RF-AJFE01045051.1-ighv:-0
):0.00503527
):0.00769702
):0.0172358
):0.0187128
):0.00387101
):-0.000102144
):0.0120353
):0.0359658
):-0.00540953
):-0.00557876
):0.00317671
):0.0014437
):0.0257474
):0.0247409
):-0.018418
):-0.000140846
):0.614438
,
(
(
(
(
(
(
V140RF-JABR01077917.1-ighv:0.0475384
,
V185RF-AQIA01075862.1-ighv:0.0475384
):0.0372811
,
(
V115RF-ABDC01345813.1-ighv:0.0589883
,
V131RF-ABDC01471087.1-ighv:0.0589883
):0.0258312
):0.0387414
,
(
V64RF-AGCE01147870.1-ighv:0.135502
,
(
V9RF-ABDC01282056.1-ighv:0.104406
,
(
V12RF-ABDC01282065.1-ighv:0.105741
,
(
V87RF-JABR01035059.1-ighv:0.0926177
,
(
V161RF-AACZ03171037.1-ighv:0.078453
,
(
(
V15RF-JABR01066987.1-ighv:0.0153224
,
V196RF-JYKQ01056010.1-ighv:0.0153224
):0.0498442
,
(
(
V129RF-JYKQ01245876.1-ighv:0.0309971
,
(
V90RF-AACZ03097899.1-ighv:-0
,
V3RF-AJFE01011110.1-ighv:-0
):0.0309971
):0.0347289
,
(
V59RF-AGCE01147864.1-ighv:0.0423869
,
V65RF-AGCE01147874.1-ighv:0.0423869
):0.0233391
):-0.000559457
):0.0132865
):0.0141647
):0.0131232
):-0.0013348
):0.0310956
):-0.0119407
):0.0205853
,
(
(
V109RF-AACZ03097919.1-ighv:-0
,
V51RF-AJFE01045053.1-ighv:-0
):0.131636
,
(
(
V56RF-ABGA01099946.1-ighv:0.0581694
,
(
V149RF-CABD02136430.1-ighv:0.0127323
,
(
V175RF-AACZ03182257.1-ighv:0.00503527
,
V203RF-AACZ03172648.1-ighv:0.00503527
):0.00769702
):0.0454371
):0.0591363
,
(
V134RF-AQIB01153557.1-ighv:0.137101
,
(
V247RF-AQIA01066387.1-ighv:0.127163
,
(
(
V43RF-AJFE01045048.1-ighv:0.0503791
,
(
V218RF-AHZZ01103094.1-ighv:0.0150156
,
V124RF-AQIB01153543.1-ighv:0.0150156
):0.0353635
):0.0409281
,
(
(
V45RF-JYKQ01041718.1-ighv:0.0532197
,
V182RF-AQIA01075862.1-ighv:0.0532197
):0.0413911
,
(
(
V156RF-AACZ03171037.1-ighv:0.0650307
,
(
V8RF-ABGA01025808.1-ighv:0.0419423
,
V57RF-ABGA01099947.1-ighv:0.0419423
):0.0230884
):0.0133077
,
(
(
V138RF-JYKQ01245890.1-ighv:0.0151675
,
V170RF-AQIA01075832.1-ighv:0.0151675
):0.054177
,
(
V25RF-ABGA01044314.1-ighv:0.056104
,
(
V110RF-AQIB01153509.1-ighv:0.0256441
,
V158RF-AQIA01075814.1-ighv:0.0256441
):0.03046
):0.0132405
):0.00899392
):0.0162724
):-0.00330359
):0.0358559
):0.009938
):-0.0197954
):0.0143302
):0.0125104
):0.0427927
,
(
(
(
V3RF-JYKQ01005758.1-ighv:0.0438175
,
(
V52RF-AHZZ01104761.1-ighv:0.0148668
,
V127RF-AQIB01153553.1-ighv:0.0148668
):0.0289507
):0.0920617
,
(
(
V61RF-AGCE01147865.1-ighv:0.0903234
,
(
V118RF-AGCE01148199.1-ighv:0.0724674
,
(
V18RF-JYKQ01005787.1-ighv:0.0701787
,
(
(
V179RF-AHZZ01084890.1-ighv:0.0150156
,
V135RF-AQIB01153558.1-ighv:0.0150156
):0.0330483
,
(
V146RF-ADFV01143437.1-ighv:0.0432698
,
(
V3RF-ABGA01025791.1-ighv:0.0340661
,
(
V131RF-JYKQ01245881.1-ighv:0.0265025
,
(
V139RF-AQIB01153566.1-ighv:0.0200621
,
(
V237RF-AQIA01066366.1-ighv:0.0175892
,
(
(
V16RF-AHZZ01069449.1-ighv:-0
,
V14RF-JYKQ01005774.1-ighv:-0
):0.00488761
,
V236RF-AQIA01066362.1-ighv:0.00488761
):0.0127016
):0.00247294
):0.00644039
):0.00756356
):0.00920367
):0.00479419
):0.0221147
):0.00228874
):0.017856
):0.0148429
,
(
V17RF-ABDC01314388.1-ighv:0.107792
,
(
V45RF-ABDC01375549.1-ighv:0.0689776
,
(
(
(
V31RF-ABGA01058273.1-ighv:0.00488761
,
V71RF-ABGA01174999.1-ighv:0.00488761
):0.0477039
,
(
(
V120RF-CABD02117421.1-ighv:0.0199615
,
V157RF-AACZ03171037.1-ighv:0.0199615
):0.0285868
,
(
V58RF-ABGA01099948.1-ighv:0.0528763
,
(
(
V102RF-AACZ03097906.1-ighv:-0
,
V47RF-AJFE01045051.1-ighv:-0
):0.0365094
,
(
V135RF-CABD02117473.1-ighv:0.0412396
,
(
V116RF-ADFV01131954.1-ighv:0.027749
,
(
V93RF-AQIB01153486.1-ighv:0.0199615
,
V242RF-AQIA01066385.1-ighv:0.0199615
):0.00778747
):0.0134907
):-0.00473021
):0.0163669
):-0.00432803
):0.00404325
):0.00479938
,
(
(
V141RF-CABD02117492.1-ighv:0.0303695
,
V93RF-AACZ03097900.1-ighv:0.0303695
):0.0307342
,
(
V9RF-ABGA01025808.1-ighv:0.0592338
,
(
V200RF-JYKQ01062881.1-ighv:0.0370348
,
(
V201RF-AHZZ01090492.1-ighv:0.043898
,
(
V87RF-AQIB01153482.1-ighv:0.0251285
,
V109RF-AQIB01153509.1-ighv:0.0251285
):0.0187695
):-0.00686321
):0.022199
):0.00186984
):-0.0037127
):0.0115867
):0.0388145
):-0.00262576
):0.0307128
):0.0319888
,
(
V40RF-JYKQ01041713.1-ighv:0.148634
,
(
V26RF-AHZZ01091599.1-ighv:0.142791
,
(
(
V106RF-AQIB01153507.1-ighv:0.0572108
,
(
V86RF-AQIB01153481.1-ighv:0.061263
,
(
(
V4RF-AJFE01011110.1-ighv:0.0251285
,
V6RF-ABGA01025808.1-ighv:0.0251285
):0.0184166
,
(
V250RF-AQIA01066395.1-ighv:0.0383834
,
(
V39RF-JYKQ01041713.1-ighv:0.0290967
,
(
V164RF-AQIA01075825.1-ighv:0.0174141
,
(
V56RF-JABR01091180.1-ighv:0.0148668
,
V83RF-JABR01004698.1-ighv:0.0148668
):0.00254736
):0.0116825
):0.00928671
):0.00516171
):0.0177179
):-0.00405219
):0.0523839
,
(
(
V42RF-AHZZ01100290.1-ighv:0.00994053
,
(
V223RF-AQIB01145361.1-ighv:-0
,
V224RF-AQIB01145362.1-ighv:-0
):0.00994053
):0.094643
,
(
(
V145RF-CABD02117545.1-ighv:0.0251285
,
V114RF-AACZ03102011.1-ighv:0.0251285
):0.0349112
,
(
(
V15RF-JYKQ01005777.1-ighv:0.0150516
,
(
V17RF-AHZZ01069451.1-ighv:0.00994053
,
V232RF-AQIA01066360.1-ighv:0.00994053
):0.00511111
):0.0400425
,
(
V5RF-JYKQ01005769.1-ighv:0.043446
,
(
V157RF-AQIA01075814.1-ighv:0.0307188
,
(
V130RF-AQIB01153555.1-ighv:0.027749
,
(
V142RF-CABD02117494.1-ighv:0.0148668
,
V92RF-AACZ03097900.1-ighv:0.0148668
):0.0128822
):0.00296981
):0.0127272
):0.0116481
):0.00494548
):0.0445439
):0.00501117
):0.0331967
):0.00584297
):0.0192336
):0.019071
):0.449592
,
(
(
(
(
V95RF-JABR01049702.1-ighv:0.0696553
,
(
V182RF-AHZZ01084892.1-ighv:0.0543122
,
(
V77RF-AHZZ01150255.1-ighv:0.0410694
,
(
V190RF-AQIA01075867.1-ighv:0.0354396
,
(
V213RF-AHZZ01096572.1-ighv:0.027749
,
(
V113RF-AQIB01153511.1-ighv:0.0148668
,
V135RF-JYKQ01245888.1-ighv:0.0148668
):0.0128822
):0.00769062
):0.0056298
):0.0132428
):0.0153431
):0.0216693
,
(
(
V88RF-JABR01035060.1-ighv:0.0251285
,
V73RF-ABGA01194059.1-ighv:0.0251285
):0.0488161
,
(
V18RF-JABR01070187.1-ighv:0.0813073
,
(
V53RF-ABGA01099941.1-ighv:0.0631552
,
(
V24RF-ABGA01044313.1-ighv:0.0730471
,
(
(
V7RF-ABDC01231274.1-ighv:0.0199615
,
(
V68RF-ABDC01407894.1-ighv:0.0148668
,
V70RF-ABDC01417489.1-ighv:0.0148668
):0.00509472
):0.0430367
,
(
V20RF-AHZZ01069455.1-ighv:0.0693778
,
(
V109RF-ADFV01131944.1-ighv:0.0593603
,
(
V99RF-JABR01063291.1-ighv:0.0609194
,
(
V171RF-JYKQ01042861.1-ighv:0.0452614
,
(
V10RF-JABR01059011.1-ighv:0.0364393
,
(
V165RF-AQIA01075826.1-ighv:0.0359327
,
(
V251RF-AHZZ01125719.1-ighv:0.0398295
,
(
V253RF-AQIA01066397.1-ighv:0.0251655
,
(
V41RF-JYKQ01041713.1-ighv:0.0148668
,
V251RF-AQIA01066395.1-ighv:0.0148668
):0.0102987
):0.014664
):-0.00389678
):0.000506621
):0.00882206
):0.0156581
):-0.0015591
):0.0100175
):-0.00637958
):0.0100489
):-0.00989193
):0.0181521
):-0.00736274
):0.01738
):0.0181042
,
(
(
V86RF-JABR01035059.1-ighv:0.0521098
,
V54RF-ABGA01099945.1-ighv:0.0521098
):0.0355755
,
(
V91RF-AACZ03097899.1-ighv:0.0760883
,
(
V164RF-AJFE01119883.1-ighv:0.0620935
,
(
V22RF-JABR01074958.1-ighv:0.0519547
,
(
V107RF-AQIB01153507.1-ighv:0.047309
,
(
V57RF-JABR01091180.1-ighv:0.0384028
,
(
V188RF-AQIA01075865.1-ighv:0.027749
,
(
V184RF-AHZZ01084893.1-ighv:0.0251285
,
V7RF-ABGA01025808.1-ighv:0.0251285
):0.00262048
):0.0106538
):0.00890622
):0.00464577
):0.0101387
):0.0139948
):0.011597
):0.0217435
):0.0542452
,
(
V57RF-AGCE01147750.1-ighv:0.15455
,
(
(
V90RF-JZKE01278271.1-ighv:0.0948553
,
(
V75RF-ABDC01421861.1-ighv:0.0663808
,
(
(
V44RF-ABDC01375549.1-ighv:-0
,
V85RF-ABDC01454767.1-ighv:-0
):0.0561925
,
(
V10RF-ABDC01282057.1-ighv:0.0309971
,
V46RF-ABDC01377237.1-ighv:0.0309971
):0.0251954
):0.0101883
):0.0284745
):0.00858843
,
(
(
(
V120RF-AGCE01148386.1-ighv:0.076191
,
(
V219RF-AHZZ01103097.1-ighv:0.0685665
,
(
V19RF-JABR01070187.1-ighv:0.0537926
,
V55RF-ABGA01099946.1-ighv:0.0537926
):0.0147739
):0.00762445
):0.00649436
,
(
(
V137RF-JYKQ01245889.1-ighv:0.0719145
,
(
(
V162RF-AQIA01075823.1-ighv:0.0337132
,
(
V53RF-AHZZ01104763.1-ighv:0.0203681
,
V246RF-AQIA01066387.1-ighv:0.0203681
):0.0133451
):0.0260617
,
(
V84RF-JABR01011024.1-ighv:0.0564979
,
(
(
V126RF-AQIB01153553.1-ighv:0.0391858
,
(
V51RF-AHZZ01104760.1-ighv:0.0364292
,
V92RF-AQIB01153485.1-ighv:0.0364292
):0.00275654
):0.0161441
,
(
(
V9RF-JYKQ01005772.1-ighv:0.0203681
,
V240RF-AQIA01066378.1-ighv:0.0203681
):0.0417616
,
(
V17RF-JYKQ01005784.1-ighv:0.0506379
,
(
V180RF-AHZZ01084890.1-ighv:0.0364292
,
V89RF-AQIB01153482.1-ighv:0.0364292
):0.0142087
):0.0114918
):-0.00679984
):0.00116803
):0.00327702
):0.0121395
):0.00682389
,
(
(
V112RF-ADFV01131950.1-ighv:0.0555489
,
(
V227RF-AQIB01158235.1-ighv:0.0440409
,
(
V114RF-AQIB01153511.1-ighv:0.0138857
,
(
V134RF-JYKQ01245886.1-ighv:0.0075127
,
(
V214RF-AHZZ01096574.1-ighv:0.00498507
,
V255RF-AQIA01073275.1-ighv:0.00498507
):0.00252764
):0.00637297
):0.0301552
):0.011508
):0.0124736
,
(
V40RF-AJFE01045037.1-ighv:0.0649038
,
(
V183RF-AHZZ01084892.1-ighv:0.0337334
,
(
V133RF-AQIB01153557.1-ighv:0.0310367
,
(
V6RF-JYKQ01005770.1-ighv:0.0203681
,
V191RF-AQIA01075868.1-ighv:0.0203681
):0.0106685
):0.00269679
):0.0311704
):0.00311871
):0.0107158
):0.003947
):0.0119067
,
(
(
V106RF-ADFV01131940.1-ighv:0.0648926
,
(
V100RF-AQIB01153501.1-ighv:0.0309971
,
V46RF-JYKQ01041718.1-ighv:0.0309971
):0.0338955
):0.0359111
,
(
V8RF-ABDC01231277.1-ighv:0.103465
,
(
(
V88RF-AQIB01153482.1-ighv:0.0364292
,
V243RF-AQIA01066387.1-ighv:0.0364292
):0.0609588
,
(
V156RF-ABGA01203420.1-ighv:0.106291
,
(
V119RF-AJFE01045447.1-ighv:0.0829294
,
(
V10RF-JZKE01244690.1-ighv:0.0694986
,
(
V123RF-ABDC01396906.1-ighv:0.065354
,
(
V77RF-ABDC01423814.1-ighv:0.0668101
,
(
V117RF-CABD02117416.1-ighv:0.0546773
,
(
V114RF-CABD02117395.1-ighv:0.0557813
,
(
(
V79RF-JYKQ01086555.1-ighv:0.0203681
,
V140RF-JYKQ01245904.1-ighv:0.0203681
):0.0319119
,
(
V118RF-AQIB01153537.1-ighv:0.0524679
,
(
V27RF-ABGA01044319.1-ighv:0.0434031
,
(
V159RF-AACZ03171037.1-ighv:0.0394319
,
(
V130RF-CABD02117463.1-ighv:0.0253837
,
V106RF-AACZ03097910.1-ighv:0.0253837
):0.0140482
):0.00397123
):0.00906475
):-0.000187896
):0.00350137
):-0.00110407
):0.0121329
):-0.00145616
):0.00414458
):0.0134308
):0.0233618
):-0.00890319
):0.00607704
):-0.00266133
):-0.00621165
):0.00885167
):0.0511066
):0.0091237
):0.449592
):0.164846
):0.418048
):0.964568
,
(
(
V115RF-AGCE01148076.1-ighv:0.140222
,
(
(
V14RF-AHZZ01064628.1-ighv:0.0822389
,
(
(
V139RF-JABR01077917.1-ighv:0.0519064
,
(
V197RF-JYKQ01056018.1-ighv:0.033367
,
(
V15RF-AHZZ01064636.1-ighv:0.0253837
,
V116RF-AQIB01153517.1-ighv:0.0253837
):0.00798333
):0.0185394
):0.022454
,
(
V79RF-ABGA01243343.1-ighv:0.0556292
,
(
V115RF-ADFV01131951.1-ighv:0.0603922
,
(
V127RF-CABD02117445.1-ighv:0.0625173
,
(
V28RF-ABGA01058270.1-ighv:0.0457098
,
(
V124RF-CABD02117439.1-ighv:0.0390202
,
(
V123RF-CABD02117438.1-ighv:0.036715
,
(
V199RF-AACZ03171126.1-ighv:0.0205777
,
V37RF-AJFE01045032.1-ighv:0.0205777
):0.0161373
):0.00230529
):0.00668959
):0.0168074
):-0.00212511
):-0.00476301
):0.0187313
):0.00787842
):0.0238056
,
(
(
V113RF-AGCE01147923.1-ighv:0.0831111
,
(
(
V104RF-AQIB01153507.1-ighv:0.0311318
,
(
(
V20RF-JYKQ01005788.1-ighv:0.0151675
,
V128RF-JYKQ01245876.1-ighv:0.0151675
):0.0134128
,
(
V161RF-AQIA01075821.1-ighv:0.0178726
,
(
V217RF-AHZZ01103093.1-ighv:0.00503527
,
V220RF-AHZZ01103097.1-ighv:0.00503527
):0.0128373
):0.0107077
):0.00255151
):0.0618705
,
(
V13RF-AHZZ01064625.1-ighv:0.0806417
,
(
(
(
V74RF-ABGA01194064.1-ighv:-0
,
V229RF-ABGA01360480.1-ighv:-0
):0.0204058
,
(
V128RF-CABD02117454.1-ighv:0.0100403
,
(
V165RF-AACZ03171037.1-ighv:-0
,
V189RF-AACZ03098100.1-ighv:-0
):0.0100403
):0.0103654
):0.0522592
,
(
(
(
V98RF-AACZ03097904.1-ighv:0.00503527
,
V44RF-AJFE01045051.1-ighv:0.00503527
):0.0208943
,
(
V138RF-CABD02117482.1-ighv:0.0201628
,
V99RF-AACZ03097905.1-ighv:0.0201628
):0.00576681
):0.0400385
,
(
V30RF-ABGA01058270.1-ighv:0.0799645
,
(
V117RF-AQIB01153522.1-ighv:0.0697064
,
(
(
V47RF-ABGA01099934.1-ighv:0.0464142
,
(
(
V77RF-JYKQ01067101.1-ighv:0.00984269
,
V179RF-AQIA01075857.1-ighv:0.00984269
):0.0308019
,
(
V102RF-ABGA01313764.1-ighv:0.0291308
,
(
(
V108RF-AACZ03097916.1-ighv:0.0126039
,
(
V13RF-ABGA01037228.1-ighv:0.00498507
,
V16RF-ABGA01044304.1-ighv:0.00498507
):0.00761883
):0.0118575
,
(
V111RF-AACZ03098146.1-ighv:0.0153224
,
V20RF-ABGA01044307.1-ighv:0.0153224
):0.00913898
):0.00466944
):0.0115138
):0.00576962
):0.00529265
,
(
(
V108RF-ADFV01131940.1-ighv:0.0259099
,
V61RF-ABGA01104800.1-ighv:0.0259099
):0.0233693
,
(
V177RF-AHZZ01069461.1-ighv:0.0521435
,
(
V119RF-ADFV01131957.1-ighv:0.0434929
,
(
V18RF-ABGA01044306.1-ighv:0.0252434
,
(
V62RF-ABGA01104801.1-ighv:0.0192639
,
(
V17RF-ABGA01044305.1-ighv:0.01795
,
(
(
V113RF-ADFV01131950.1-ighv:0.0101422
,
V100RF-ABGA01313761.1-ighv:0.0101422
):0.00518022
,
V14RF-ABGA01044302.1-ighv:0.0153224
):0.00262765
):0.00131382
):0.00597948
):0.0182495
):0.00865064
):-0.00286432
):0.00242768
):0.0179995
):0.0102581
):-0.0139964
):0.00669693
):0.00797676
):0.0123605
):-0.00989114
):0.0100702
,
(
(
(
(
V98RF-AQIB01153492.1-ighv:0.033875
,
(
V250RF-AHZZ01112481.1-ighv:0.0259099
,
V177RF-AQIA01075855.1-ighv:0.0259099
):0.00796517
):0.0192868
,
(
V28RF-AHZZ01091603.1-ighv:0.0533186
,
(
V159RF-AQIA01075818.1-ighv:0.0392784
,
(
V249RF-AQIA01066387.1-ighv:0.0406658
,
(
V172RF-AQIA01075834.1-ighv:0.0283206
,
(
V181RF-AQIA01075860.1-ighv:0.0201628
,
V184RF-AQIA01075862.1-ighv:0.0201628
):0.00815785
):0.0123452
):-0.00138738
):0.0140402
):-0.00015676
):0.00889019
,
(
V65RF-AHZZ01110760.1-ighv:0.0659996
,
(
V38RF-AHZZ01098942.1-ighv:0.0607832
,
(
(
V21RF-JABR01074704.1-ighv:0.0203681
,
V174RF-AQIA01075844.1-ighv:0.0203681
):0.0202736
,
(
V180RF-AQIA01075859.1-ighv:0.0368824
,
(
V226RF-AQIB01153518.1-ighv:0.053558
,
(
V125RF-AQIB01153550.1-ighv:0.047132
,
(
V138RF-JABR01077916.1-ighv:0.0450528
,
(
V54RF-JABR01091180.1-ighv:0.0443341
,
(
V178RF-AQIA01075856.1-ighv:0.0308349
,
(
(
V39RF-AHZZ01098950.1-ighv:0.0201628
,
V168RF-AQIA01075832.1-ighv:0.0201628
):0
,
V171RF-AQIA01075832.1-ighv:0.0201628
):0.0106721
):0.0134992
):0.000718698
):0.0020792
):0.00642607
):-0.0166757
):0.00375932
):0.0201415
):0.00521632
):-0.00394753
):0.00822008
,
(
V242RF-AHZZ01108758.1-ighv:0.0892464
,
(
V168RF-JYKQ01042840.1-ighv:0.0783632
,
(
(
V202RF-AHZZ01090494.1-ighv:0.0337132
,
(
V211RF-AHZZ01096568.1-ighv:0.0100403
,
V221RF-AHZZ01103258.1-ighv:0.0100403
):0.0236729
):0.0329638
,
(
V216RF-AHZZ01103093.1-ighv:0.0678679
,
(
V159RF-JYKQ01015003.1-ighv:0.0547936
,
(
(
V89RF-JABR01035060.1-ighv:0.0203681
,
V155RF-AQIA01075814.1-ighv:0.0203681
):0.028633
,
(
V85RF-AQIB01153480.1-ighv:0.0364697
,
(
V74RF-AHZZ01129142.1-ighv:0.0256441
,
(
V136RF-JYKQ01245888.1-ighv:0.0203681
,
V173RF-AQIA01075834.1-ighv:0.0203681
):0.00527596
):0.0108257
):0.0125313
):0.0057925
):0.0130743
):-0.00119095
):0.0116863
):0.0108832
):-0.0189743
):0.0229093
):0.0128631
):0.0341771
):2.04997
,
(
(
(
(
V38RF-JYKQ01041707.1-ighv:0.0100403
,
V252RF-AQIA01066397.1-ighv:0.0100403
):0.0397789
,
(
V0RF-ABGA01025787.1-ighv:0.0243251
,
(
V2RF-AJFE01011107.1-ighv:0.0075127
,
(
V144RF-CABD02117506.1-ighv:0.00498507
,
V89RF-AACZ03097899.1-ighv:0.00498507
):0.00252764
):0.0168124
):0.0254942
):0.0190413
,
(
(
V122RF-CABD02117431.1-ighv:0.0203681
,
V164RF-AACZ03171037.1-ighv:0.0203681
):0.0308822
,
(
(
V104RF-ADFV01131938.1-ighv:-0
,
V105RF-ADFV01131939.1-ighv:-0
):0.0402099
,
(
V167RF-AQIA01075830.1-ighv:0.030008
,
(
V13RF-JABR01059012.1-ighv:0.0285903
,
(
(
(
V73RF-AHZZ01124687.1-ighv:-0
,
V253RF-AHZZ01125719.1-ighv:-0
):0
,
V254RF-AHZZ01181503.1-ighv:-0
):0.0153224
,
V132RF-JYKQ01245882.1-ighv:0.0153224
):0.0132679
):0.00141766
):0.0102019
):0.0110404
):0.0176102
):1.76658
,
(
(
(
(
V59RF-ABGA01099955.1-ighv:0.0102461
,
V113RF-ABGA01362157.1-ighv:0.0102461
):0.0521641
,
(
(
V137RF-AQIB01153564.1-ighv:0.0256441
,
V138RF-AQIB01153565.1-ighv:0.0256441
):0.0155217
,
(
(
(
V178RF-AHZZ01084887.1-ighv:0.0205777
,
(
V11RF-JYKQ01005773.1-ighv:-0
,
V12RF-JYKQ01005774.1-ighv:-0
):0.0205777
):0
,
V238RF-AQIA01066369.1-ighv:0.0205777
):0.0136517
,
(
(
V91RF-JABR01035060.1-ighv:0.00503527
,
V208RF-JABR01190886.1-ighv:0.00503527
):0.0256443
,
(
V23RF-ABGA01044310.1-ighv:0.0272823
,
(
V129RF-AQIB01153555.1-ighv:0.0230061
,
(
V185RF-AHZZ01084896.1-ighv:0.0151675
,
V187RF-AQIA01075862.1-ighv:0.0151675
):0.00783863
):0.00427622
):0.00339723
):0.00354989
):0.00693636
):0.0212444
):-0.00274132
,
(
V58RF-AGCE01147864.1-ighv:0.0480898
,
(
V136RF-CABD02117475.1-ighv:0.0205777
,
(
V101RF-AACZ03097906.1-ighv:-0
,
V46RF-AJFE01045051.1-ighv:-0
):0.0205777
):0.0275121
):0.0115791
):1.19597
,
(
(
(
V62RF-AGCE01147866.1-ighv:0.110329
,
(
V12RF-AHZZ01064617.1-ighv:0.0620083
,
(
V122RF-AQIB01153541.1-ighv:0.0309971
,
V160RF-JYKQ01015024.1-ighv:0.0309971
):0.0310112
):0.048321
):0.028465
,
(
(
(
V16RF-JABR01066987.1-ighv:0.0645687
,
(
(
V203RF-AHZZ01090495.1-ighv:0.0151675
,
V169RF-JYKQ01042857.1-ighv:0.0151675
):0.0421461
,
(
(
V96RF-AQIB01153491.1-ighv:0.0309971
,
V176RF-AQIA01075848.1-ighv:0.0309971
):0.0246751
,
(
(
V14RF-JABR01062345.1-ighv:0.0419839
,
(
V52RF-JABR01089346.1-ighv:0.0256441
,
V103RF-JABR01068488.1-ighv:0.0256441
):0.0163398
):0.0128195
,
(
V120RF-AQIB01153538.1-ighv:0.0477088
,
(
V141RF-JABR01078980.1-ighv:0.0364292
,
V142RF-JABR01086102.1-ighv:0.0364292
):0.0112795
):0.00709452
):0.000868984
):0.00164125
):0.00725511
):0.0142628
,
(
V126RF-ADFV01131961.1-ighv:0.0665171
,
(
V11RF-ABGA01025808.1-ighv:0.0533945
,
(
V115RF-CABD02117395.1-ighv:0.0309971
,
(
V95RF-AACZ03097900.1-ighv:-0
,
V5RF-AJFE01011111.1-ighv:-0
):0.0309971
):0.0223973
):0.0131227
):0.0123143
):0.0577707
,
(
V121RF-AQIB01153538.1-ighv:0.0901312
,
(
V67RF-AHZZ01111405.1-ighv:0.0510422
,
(
(
V15RF-ABGA01044302.1-ighv:-0
,
V101RF-ABGA01313763.1-ighv:-0
):0.0317299
,
(
V120RF-ADFV01131958.1-ighv:0.021461
,
V139RF-CABD02117482.1-ighv:0.021461
):0.0102689
):0.0193122
):0.039089
):0.046471
):0.0021922
):0.0327312
,
(
(
V90RF-AQIB01153484.1-ighv:0.0829837
,
V48RF-ABGA01099934.1-ighv:0.0829837
):0.109967
,
(
(
V56RF-ADFV01136793.1-ighv:0.102539
,
(
(
V94RF-AQIB01153489.1-ighv:0.0256441
,
V241RF-AQIA01066385.1-ighv:0.0256441
):0.04757
,
(
V70RF-ABGA01174995.1-ighv:0.0518212
,
(
V51RF-ABGA01099940.1-ighv:0.0447404
,
(
V155RF-AACZ03171037.1-ighv:0.00498507
,
V39RF-AJFE01045037.1-ighv:0.00498507
):0.0397553
):0.00708084
):0.0213928
):0.0293245
):0.0897204
,
(
(
V97RF-AQIB01153491.1-ighv:0.0715773
,
(
V102RF-AQIB01153504.1-ighv:-0
,
V103RF-AQIB01153506.1-ighv:-0
):0.0715773
):0.079795
,
(
(
V111RF-AGCE01147916.1-ighv:0.0664262
,
(
(
V123RF-AQIB01153541.1-ighv:0.0151675
,
V161RF-JYKQ01015026.1-ighv:0.0151675
):0.0323923
,
(
V133RF-CABD02117467.1-ighv:0.0256441
,
(
V105RF-AACZ03097906.1-ighv:-0
,
V50RF-AJFE01045051.1-ighv:-0
):0.0256441
):0.0219157
):0.0188665
):0.0749472
,
(
V93RF-AJFE01010857.1-ighv:0.169516
,
(
(
V115RF-AACZ03102011.1-ighv:0.0203681
,
V163RF-AJFE01119867.1-ighv:0.0203681
):0.125201
,
(
(
(
V110RF-ADFV01131946.1-ighv:0.0309971
,
V121RF-ADFV01131959.1-ighv:0.0309971
):0.0423984
,
(
V112RF-AQIB01153509.1-ighv:0.0607793
,
(
(
V61RF-AHZZ01108247.1-ighv:0.0339048
,
(
V215RF-AHZZ01096575.1-ighv:0.0259099
,
V171RF-JABR01092598.1-ighv:0.0259099
):0.00799495
):0.00469531
,
(
V133RF-JYKQ01245882.1-ighv:0.0309971
,
V254RF-AQIA01073275.1-ighv:0.0309971
):0.00760299
):0.0221792
):0.0126162
):0.0661303
,
(
(
V227RF-ABGA01360476.1-ighv:0.0909049
,
(
V187RF-AACZ03098097.1-ighv:0.0704985
,
(
(
V146RF-CABD02117766.1-ighv:0.0203681
,
V147RF-CABD02117767.1-ighv:0.0203681
):0.0376565
,
(
V103RF-ADFV01131933.1-ighv:0.047581
,
(
(
V33RF-CABD02136332.1-ighv:-0
,
V132RF-CABD02117467.1-ighv:-0
):0.0364292
,
(
V104RF-AACZ03097906.1-ighv:-0
,
V49RF-AJFE01045051.1-ighv:-0
):0.0364292
):0.0111518
):0.0104436
):0.0124739
):0.0204064
):0.0232168
,
(
(
(
V112RF-CABD02117385.1-ighv:0.00498507
,
V190RF-AACZ03098100.1-ighv:0.00498507
):0.0369573
,
V228RF-ABGA01360478.1-ighv:0.0419423
):0.0579203
,
(
V69RF-ABGA01174994.1-ighv:0.118352
,
(
(
V81RF-JABR01004697.1-ighv:0.0270016
,
(
V24RF-AHZZ01091598.1-ighv:0.0126039
,
(
(
V91RF-AQIB01153484.1-ighv:-0
,
V245RF-AQIA01066387.1-ighv:-0
):0.00498507
,
V44RF-JYKQ01041718.1-ighv:0.00498507
):0.00761883
):0.0143977
):0.0859714
,
(
(
(
V160RF-AACZ03171037.1-ighv:-0
,
V118RF-AJFE01045444.1-ighv:-0
):0.0583006
,
(
V76RF-JYKQ01067101.1-ighv:0.0323552
,
(
V175RF-AQIA01075848.1-ighv:0.0337932
,
(
V96RF-JABR01055994.1-ighv:0.0256441
,
V119RF-AQIB01153538.1-ighv:0.0256441
):0.00814914
):-0.00143803
):0.0259454
):0.0318243
,
(
V56RF-AGCE01147749.1-ighv:0.0942265
,
(
V57RF-ABDC01391612.1-ighv:0.0921059
,
(
V116RF-AGCE01148081.1-ighv:0.0945293
,
(
V112RF-AGCE01147919.1-ighv:0.0814305
,
(
V71RF-AGCE01148067.1-ighv:0.060588
,
(
(
V99RF-AQIB01153498.1-ighv:0.0177678
,
(
V200RF-AHZZ01090492.1-ighv:0.00498507
,
V156RF-AQIA01075814.1-ighv:0.00498507
):0.0127827
):0.021418
,
(
V125RF-JYKQ01245859.1-ighv:0.0256441
,
V199RF-JYKQ01062881.1-ighv:0.0256441
):0.0135417
):0.0214022
):0.0208425
):0.0130988
):-0.00242342
):0.00212063
):-0.00410166
):0.0228482
):0.00537866
):-0.018489
):0.014259
):0.0254042
):0.00604361
):0.0239462
):-0.0281423
):0.00999893
):0.0408866
):0.000691682
):-0.0214251
):1.19597
):0.570605
):0.283389
):-0.0529133
):0.491729
):3.9143
,
(
(
(
(
(
V107RF-AGCE01134619.1-igkv:0.399172
,
(
(
V148RF-ABGA01154384.1-igkv:0.0463703
,
(
(
V6RF-AHZZ01040804.1-igkv:0.0360935
,
(
V85RF-JABR01032523.1-igkv:0.0253837
,
V229RF-AQIA01017139.1-igkv:0.0253837
):0.0107099
):0.0117442
,
(
V150RF-CABD02196508.1-igkv:0.0360539
,
V24RF-AJFE01016082.1-igkv:0.0360539
):0.0117838
):-0.00146743
):0.310156
,
(
V46RF-JABR01088351.1-igkv:0.162984
,
(
(
V83RF-ABDC01446518.1-igkv:0.0760538
,
(
V60RF-ABDC01394567.1-igkv:0.0700431
,
(
(
V6RF-JZKE01218259.1-igkv:0.0253837
,
V31RF-JZKE01296733.1-igkv:0.0253837
):0.0302133
,
(
V31RF-ABDC01351837.1-igkv:0.0465544
,
V139RF-ABDC01562688.1-igkv:0.0465544
):0.00904256
):0.0144462
):0.0060107
):0.0391351
,
(
(
V97RF-ABDC01523330.1-igkv:0.0696926
,
(
V37RF-ABDC01360510.1-igkv:0.0410805
,
V61RF-ABDC01396012.1-igkv:0.0410805
):0.0286121
):0.0326854
,
(
V34RF-AGCE01134600.1-igkv:0.088387
,
(
(
V156RF-CABD02196545.1-igkv:0.0372039
,
(
V142RF-AACZ03151853.1-igkv:-0
,
V15RF-AJFE01012235.1-igkv:-0
):0.0372039
):0.0462318
,
(
(
V175RF-JYKQ01052437.1-igkv:0.0606552
,
(
V176RF-JYKQ01052439.1-igkv:0.0423183
,
(
V21RF-AQIB01144263.1-igkv:0.0454491
,
(
V141RF-ADFV01132961.1-igkv:0.0497888
,
(
V93RF-AHZZ01042078.1-igkv:0.0350982
,
(
V198RF-AQIA01017118.1-igkv:0.0316926
,
(
V197RF-AQIA01017118.1-igkv:0.0345313
,
(
V158RF-JYKQ01005048.1-igkv:0.0318164
,
(
V22RF-AQIB01144263.1-igkv:0.0207916
,
V228RF-AQIB01159121.1-igkv:0.0207916
):0.0110247
):0.00271492
):-0.00283869
):0.0034056
):0.0146906
):-0.00433969
):-0.00313081
):0.0183368
):0.0155706
,
(
V20RF-AQIB01144258.1-igkv:0.0815319
,
(
V44RF-AGCE01134604.1-igkv:0.0836243
,
(
(
V202RF-AQIA01017118.1-igkv:0.0234864
,
(
V43RF-AHZZ01104241.1-igkv:0.00508649
,
(
(
V24RF-JABR01076260.1-igkv:-0
,
V25RF-AQIB01144263.1-igkv:-0
):0
,
V26RF-AQIB01144264.1-igkv:-0
):0.00508649
):0.0183999
):0.0348501
,
(
(
V138RF-AACZ03151853.1-igkv:0.00488761
,
V12RF-AJFE01012234.1-igkv:0.00488761
):0.037526
,
(
V157RF-CABD02196547.1-igkv:0.0316926
,
(
V101RF-JABR01064858.1-igkv:0.0207916
,
V155RF-ABGA01199503.1-igkv:0.0207916
):0.010901
):0.010721
):0.0159229
):0.0252878
):-0.00209246
):-0.00530611
):0.0072099
):0.00495131
):0.013991
):0.0128109
):0.0477947
):0.193543
):0.0426453
):0.625424
,
(
(
(
V135RF-ADFV01132961.1-igkv:0.0977593
,
(
V35RF-AGCE01134600.1-igkv:0.0810416
,
(
V100RF-AHZZ01042083.1-igkv:0.0846988
,
(
(
V188RF-ABGA01257777.1-igkv:0.0199615
,
V223RF-ABGA01322683.1-igkv:0.0199615
):0.0415515
,
(
V120RF-AHZZ01042094.1-igkv:0.0602441
,
(
(
V10RF-AHZZ01042101.1-igkv:0.0248784
,
V195RF-AQIA01017094.1-igkv:0.0248784
):0.0205057
,
(
(
V39RF-AQIA01017097.1-igkv:0.0174141
,
(
V109RF-AHZZ01042093.1-igkv:0.00488761
,
V188RF-JYKQ01052444.1-igkv:0.00488761
):0.0125265
):0.0173284
,
(
V160RF-CABD02196559.1-igkv:0.0301022
,
(
V111RF-AHZZ01042093.1-igkv:0.0248784
,
V44RF-JABR01088351.1-igkv:0.0248784
):0.00522376
):0.0046404
):0.0106415
):0.01486
):0.00126896
):0.0231858
):-0.00365717
):0.0167177
):0.0143333
,
(
(
V53RF-AQIA01017115.1-igkv:0.0775059
,
(
(
V56RF-AQIA01017115.1-igkv:0.0719889
,
(
V35RF-ABDC01360510.1-igkv:0.0604425
,
(
(
V7RF-JZKE01218269.1-igkv:0.0418043
,
(
(
V16RF-AQIB01144244.1-igkv:0.00984269
,
V178RF-JYKQ01052440.1-igkv:0.00984269
):0.0137034
,
(
V52RF-AQIA01017115.1-igkv:0.0180598
,
(
V180RF-JYKQ01052440.1-igkv:0.0136108
,
(
V17RF-AQIB01144247.1-igkv:0.0123547
,
(
V97RF-AHZZ01042080.1-igkv:0.00488761
,
V54RF-AQIA01017115.1-igkv:0.00488761
):0.00746713
):0.00125602
):0.00444905
):0.00548626
):0.0182582
):0.0100105
,
(
V137RF-ADFV01132961.1-igkv:0.0372039
,
V125RF-ABGA01394062.1-igkv:0.0372039
):0.0146109
):0.00862771
):0.0115464
):0.00933458
,
(
V46RF-AGCE01134609.1-igkv:0.0940736
,
(
(
V191RF-JYKQ01052444.1-igkv:0.0356862
,
V36RF-AQIA01017094.1-igkv:0.0356862
):0.0269442
,
(
V142RF-ADFV01132961.1-igkv:0.0591569
,
(
(
(
V103RF-AHZZ01042085.1-igkv:0.0148668
,
(
V185RF-JYKQ01052442.1-igkv:0.00488761
,
V119RF-AQIA01058132.1-igkv:0.00488761
):0.00997918
):0.0324636
,
(
V39RF-CABD02196568.1-igkv:0.022545
,
(
V139RF-AACZ03151853.1-igkv:0.00488761
,
V13RF-AJFE01012234.1-igkv:0.00488761
):0.0176574
):0.0247854
):0.00694523
,
(
(
V10RF-AQIB01144242.1-igkv:0.0303695
,
V187RF-JYKQ01052443.1-igkv:0.0303695
):0.0211789
,
(
V9RF-AQIB01144240.1-igkv:0.0552843
,
(
V41RF-AGCE01134603.1-igkv:0.056592
,
(
V5RF-JZKE01218259.1-igkv:0.0384619
,
(
V28RF-ABDC01351832.1-igkv:0.0199615
,
V106RF-ABDC01583217.1-igkv:0.0199615
):0.0185004
):0.0181301
):-0.00130771
):-0.00373597
):0.00272723
):0.00488128
):0.00347349
):0.0314432
):-0.0127501
):-0.00381754
):0.0125663
,
(
V40RF-CABD02196577.1-igkv:0.106229
,
(
V40RF-AGCE01134603.1-igkv:0.0816081
,
(
V108RF-AHZZ01042093.1-igkv:0.0839794
,
(
(
V113RF-AHZZ01042093.1-igkv:0.0303695
,
V42RF-AQIA01017097.1-igkv:0.0303695
):0.0422782
,
(
V118RF-AACZ03126842.1-igkv:0.0662358
,
(
V23RF-AQIB01144263.1-igkv:0.0615763
,
(
V23RF-JABR01076259.1-igkv:0.0538347
,
(
V31RF-AGCE01134597.1-igkv:0.0330278
,
(
V91RF-AHZZ01042077.1-igkv:0.00488761
,
V200RF-AQIA01017118.1-igkv:0.00488761
):0.0281402
):0.0208069
):0.00774159
):0.0046595
):0.00641186
):0.0113317
):-0.00237136
):0.0246213
):-0.0161571
):0.0220203
):0.317463
,
(
(
V18RF-AJFE01012238.1-igkv:0.0927972
,
(
V38RF-ABDC01360666.1-igkv:0.0950232
,
(
V118RF-ABDC01358932.1-igkv:0.0875065
,
(
V102RF-JABR01067077.1-igkv:0.0940868
,
(
(
V98RF-AHZZ01042080.1-igkv:0.0148668
,
V179RF-JYKQ01052440.1-igkv:0.0148668
):0.0468439
,
(
(
V199RF-AQIA01017118.1-igkv:0.0174141
,
(
V94RF-AHZZ01042078.1-igkv:0.00488761
,
V157RF-JYKQ01005045.1-igkv:0.00488761
):0.0125265
):0.0534321
,
(
V29RF-ABDC01351835.1-igkv:0.0601069
,
(
V139RF-ADFV01132961.1-igkv:0.0740461
,
(
V101RF-ADFV01106214.1-igkv:0.0468322
,
(
V134RF-ADFV01132961.1-igkv:0.0546476
,
(
V43RF-AGCE01134604.1-igkv:0.0304073
,
(
V36RF-AGCE01134600.1-igkv:0.0251285
,
V185RF-ABGA01257764.1-igkv:0.0251285
):0.00527885
):0.0242403
):-0.00781538
):0.0272139
):-0.0139393
):0.0107394
):-0.00913556
):0.0323761
):-0.00658026
):0.00751664
):-0.00222601
):0.00633176
,
(
(
V5RF-AQIB01144237.1-igkv:0.0578125
,
(
V8RF-AHZZ01042100.1-igkv:0.0356862
,
(
V112RF-AHZZ01042093.1-igkv:0.0199615
,
V52RF-JYKQ01052451.1-igkv:0.0199615
):0.0157247
):0.0221263
):0.0454881
,
(
(
V39RF-AGCE01134602.1-igkv:0.0811916
,
(
V13RF-AQIB01144243.1-igkv:0.0475983
,
(
(
V105RF-AHZZ01042091.1-igkv:0.027749
,
(
V141RF-AQIB01158310.1-igkv:0.0199615
,
V46RF-AQIA01017099.1-igkv:0.0199615
):0.00778747
):0.00759574
,
(
V118RF-AHZZ01042093.1-igkv:0.0386555
,
(
V193RF-JYKQ01052444.1-igkv:0.0357439
,
(
V12RF-AQIB01144242.1-igkv:0.022545
,
(
V102RF-AHZZ01042085.1-igkv:0.0199615
,
V48RF-AQIA01017100.1-igkv:0.0199615
):0.00258349
):0.0131989
):0.00291157
):-0.0033108
):0.0122535
):0.0335934
):0.00534648
,
(
(
(
V81RF-AJFE01000028.1-igkv:0.00974675
,
V75RF-ABGA01197604.1-igkv:0.00974675
):0.055485
,
(
V8RF-AJFE01012232.1-igkv:0.0607693
,
(
(
V133RF-AACZ03151853.1-igkv:0.0147209
,
V84RF-AJFE01003455.1-igkv:0.0147209
):0.0314756
,
(
V40RF-AQIA01017097.1-igkv:0.0274717
,
(
V4RF-AQIB01144236.1-igkv:0.0248784
,
V53RF-JYKQ01052451.1-igkv:0.0248784
):0.00259333
):0.0187248
):0.0145728
):0.00446244
):0.0113962
,
(
V9RF-AHZZ01042101.1-igkv:0.0808113
,
(
(
V116RF-AHZZ01042093.1-igkv:0.0356862
,
V8RF-AQIB01144237.1-igkv:0.0356862
):0.0168375
,
(
V45RF-AQIA01017097.1-igkv:0.0456602
,
(
V195RF-JYKQ01052451.1-igkv:0.0383834
,
(
V143RF-ADFV01132961.1-igkv:0.0425688
,
(
V47RF-JABR01088351.1-igkv:0.0412396
,
(
(
V140RF-AACZ03151853.1-igkv:-0
,
V14RF-AJFE01012234.1-igkv:-0
):0.0199615
,
V124RF-ABGA01394059.1-igkv:0.0199615
):0.0212781
):0.00132919
):-0.00418545
):0.0072768
):0.00686349
):0.0282877
):-0.00418346
):0.00991023
):0.0167625
):-0.00417165
):0.317463
):0.307961
):1.02413
,
(
(
(
(
V34RF-ADFV01106193.1-igkv:0.0573685
,
(
V27RF-JABR01076261.1-igkv:0.0362643
,
(
V29RF-AQIB01144264.1-igkv:0.018326
,
(
V46RF-AHZZ01104241.1-igkv:0.00513877
,
V205RF-AQIA01017118.1-igkv:0.00513877
):0.0131872
):0.0179383
):0.0211041
):0.144752
,
(
(
V3RF-ABDC01165520.1-igkv:-0
,
V96RF-ABDC01522041.1-igkv:-0
):0.167253
,
(
(
V30RF-ABDC01351837.1-igkv:0.0239873
,
(
V27RF-ABDC01351831.1-igkv:0.00519213
,
V136RF-ABDC01537099.1-igkv:0.00519213
):0.0187951
):0.0910281
,
(
V36RF-ABDC01360510.1-igkv:0.0868327
,
(
V59RF-ABDC01394567.1-igkv:0.0740255
,
V108RF-ABDC01599688.1-igkv:0.0740255
):0.0128071
):0.0281827
):0.0522379
):0.0348675
):0.809686
,
(
(
(
V184RF-AACZ03016143.1-igkv:0.139218
,
(
V76RF-ABGA01198108.1-igkv:0.124314
,
(
V32RF-AGCE01134598.1-igkv:0.123538
,
(
V37RF-AGCE01134600.1-igkv:0.0921934
,
(
(
(
V41RF-AQIB01144273.1-igkv:0.0376037
,
V208RF-JYKQ01076937.1-igkv:0.0376037
):0.0250077
,
(
V192RF-JYKQ01052444.1-igkv:0.058184
,
(
V99RF-AHZZ01042083.1-igkv:0.0581879
,
(
V184RF-JYKQ01052441.1-igkv:0.0351525
,
(
V48RF-JABR01088351.1-igkv:0.0327013
,
(
(
V49RF-AQIA01017105.1-igkv:-0
,
V120RF-AQIA01058133.1-igkv:-0
):0.0223922
,
(
V50RF-JABR01088351.1-igkv:0.018326
,
(
V104RF-AHZZ01042085.1-igkv:0.00513877
,
V14RF-AQIB01144243.1-igkv:0.00513877
):0.0131872
):0.00406618
):0.0103091
):0.00245123
):0.0230354
):-3.88175e-06
):0.00442741
):0.00423298
,
(
V130RF-ABGA01394071.1-igkv:0.0718774
,
(
(
V11RF-AQIB01144242.1-igkv:0.0210101
,
V186RF-JYKQ01052443.1-igkv:0.0210101
):0.0401148
,
(
V117RF-AHZZ01042093.1-igkv:0.0491975
,
(
(
V196RF-AACZ03151873.1-igkv:0.00513877
,
V214RF-AACZ03183442.1-igkv:0.00513877
):0.0279661
,
(
V197RF-AACZ03151911.1-igkv:0.0219578
,
(
(
V161RF-CABD02196901.1-igkv:0.0103522
,
V167RF-CABD02379503.1-igkv:0.0103522
):0.0125533
,
(
V207RF-AACZ03178854.1-igkv:0.0179954
,
(
V183RF-AACZ03016034.1-igkv:0.0176648
,
(
V0RF-CABD02043817.1-igkv:0.0143195
,
(
V213RF-AACZ03179806.1-igkv:0.00774547
,
(
V119RF-AACZ03126842.1-igkv:0.00513877
,
V208RF-AACZ03179013.1-igkv:0.00513877
):0.0026067
):0.00657405
):0.00334527
):0.000330612
):0.00491007
):-0.000947706
):0.0111471
):0.0160926
):0.0119274
):0.0107526
):-0.00503306
):0.0253491
):0.0313442
):0.000776455
):0.0149037
):0.0192637
,
(
(
(
(
V88RF-AHZZ01040807.1-igkv:0.0103522
,
V59RF-AQIA01017140.1-igkv:0.0103522
):0.0161062
,
V219RF-AQIB01144282.1-igkv:0.0264584
):0.125639
,
(
V133RF-ADFV01132961.1-igkv:0.154557
,
(
V109RF-ABGA01356722.1-igkv:0.136924
,
(
V38RF-AGCE01134600.1-igkv:0.125789
,
(
(
V7RF-AQIB01144237.1-igkv:0.0376254
,
(
V115RF-AHZZ01042093.1-igkv:0.0264584
,
(
V190RF-JYKQ01052444.1-igkv:0.0210101
,
V44RF-AQIA01017097.1-igkv:0.0210101
):0.00544831
):0.011167
):0.0932164
,
(
V28RF-JABR01076261.1-igkv:0.11046
,
(
V221RF-AQIA01017128.1-igkv:0.121793
,
(
V47RF-AGCE01134610.1-igkv:0.10395
,
(
(
(
V132RF-ADFV01132961.1-igkv:0.040542
,
(
(
V182RF-AACZ03015754.1-igkv:0.0103522
,
V7RF-AJFE01011588.1-igkv:0.0103522
):0.0161062
,
V187RF-ABGA01257772.1-igkv:0.0264584
):0.0140836
):0.0172105
,
(
V33RF-AGCE01134599.1-igkv:0.0584485
,
(
V37RF-AQIA01017096.1-igkv:0.0257876
,
(
V3RF-AQIB01144236.1-igkv:0.0196881
,
(
V45RF-JABR01088351.1-igkv:0.0129971
,
(
V107RF-AHZZ01042093.1-igkv:0.00513877
,
V194RF-JYKQ01052450.1-igkv:0.00513877
):0.0078583
):0.00669103
):0.00609951
):0.0326609
):-0.000696037
):0.0461352
,
(
V50RF-JYKQ01051984.1-igkv:0.100442
,
(
(
V152RF-CABD02196515.1-igkv:0.0129971
,
(
V180RF-AACZ03015562.1-igkv:0.00513877
,
V82RF-AJFE01002289.1-igkv:0.00513877
):0.0078583
):0.0728774
,
(
(
V151RF-CABD02196513.1-igkv:0.0319889
,
V176RF-AACZ03015561.1-igkv:0.0319889
):0.0430223
,
(
(
V206RF-JYKQ01075085.1-igkv:0.0347963
,
(
V241RF-AHZZ01107399.1-igkv:0.00513877
,
V174RF-JYKQ01044662.1-igkv:0.00513877
):0.0296576
):0.0348713
,
(
(
V46RF-CABD02196595.1-igkv:-0
,
V83RF-AJFE01002352.1-igkv:-0
):0.0840115
,
(
(
V152RF-ABGA01180641.1-igkv:0.010684
,
V154RF-ABGA01180644.1-igkv:0.010684
):0.0557826
,
(
V83RF-ABGA01285648.1-igkv:0.057401
,
(
V149RF-AACZ03151857.1-igkv:0.0614134
,
(
V50RF-AGCE01134614.1-igkv:0.0676846
,
(
(
V145RF-AACZ03151855.1-igkv:0.00513877
,
V20RF-AJFE01012238.1-igkv:0.00513877
):0.0512244
,
(
V149RF-ABGA01154386.1-igkv:0.0514483
,
(
V151RF-AACZ03151858.1-igkv:0.0390507
,
(
V84RF-ABGA01285649.1-igkv:0.0292236
,
(
V39RF-ADFV01106195.1-igkv:0.0103522
,
V146RF-AACZ03151855.1-igkv:0.0103522
):0.0188715
):0.00982705
):0.0123976
):0.00491485
):0.0113214
):-0.00627121
):-0.00401232
):0.00906549
):0.017545
):-0.0143439
):0.00534359
):0.0108633
):0.014568
):0.00344528
):6.27041e-05
):0.0178422
):-0.0113323
):0.0203814
):-0.00505231
):0.0111344
):0.017633
):-0.00245911
):-0.0129565
,
(
(
V138RF-ADFV01132961.1-igkv:0.104087
,
(
(
V18RF-AQIB01144251.1-igkv:0.0490951
,
V11RF-AJFE01012232.1-igkv:0.0490951
):0.0227316
,
(
V98RF-JABR01061517.1-igkv:0.0639862
,
(
V92RF-AHZZ01042078.1-igkv:0.0264584
,
V183RF-JYKQ01052440.1-igkv:0.0264584
):0.0375279
):0.00784048
):0.0322599
):0.0255563
,
(
(
V136RF-ADFV01132961.1-igkv:0.095841
,
(
(
V96RF-AHZZ01042080.1-igkv:0.0210101
,
V15RF-AQIB01144243.1-igkv:0.0210101
):0.0370009
,
(
V119RF-AHZZ01042093.1-igkv:0.0433051
,
V47RF-AQIA01017099.1-igkv:0.0433051
):0.0147059
):0.0378301
):0.00856955
,
(
(
(
V24RF-AQIB01144263.1-igkv:0.0223922
,
(
V201RF-AQIA01017118.1-igkv:0.0129971
,
(
V90RF-AHZZ01042076.1-igkv:0.00513877
,
V156RF-JYKQ01005040.1-igkv:0.00513877
):0.0078583
):0.00939513
):0.0322123
,
(
V42RF-AGCE01134604.1-igkv:0.0380123
,
V144RF-ADFV01132961.1-igkv:0.0380123
):0.0165923
):0.0384537
,
(
V39RF-JABR01076264.1-igkv:0.0579636
,
(
V47RF-AQIB01144276.1-igkv:0.0433051
,
V225RF-AQIA01017130.1-igkv:0.0433051
):0.0146585
):0.0350946
):0.0113524
):0.0252324
):0.00949819
):0.0193404
):0.442808
,
(
(
(
(
V150RF-ABGA01161530.1-igkv:0.0376037
,
V55RF-AQIA01017115.1-igkv:0.0376037
):0.0472444
,
(
V47RF-CABD02199693.1-igkv:0.0961191
,
(
V153RF-AACZ03151979.1-igkv:0.0795284
,
(
(
V32RF-AQIB01144265.1-igkv:0.0344988
,
(
V152RF-JYKQ01005027.1-igkv:0.0189205
,
(
V49RF-AHZZ01104243.1-igkv:0.0161471
,
V207RF-AQIA01017120.1-igkv:0.0161471
):0.00277333
):0.0155783
):0.0503589
,
(
V54RF-AHZZ01105091.1-igkv:0.0769399
,
(
(
(
V63RF-AHZZ01109397.1-igkv:0.00513877
,
V48RF-JYKQ01051981.1-igkv:0.00513877
):0.0268501
,
V212RF-JYKQ01081225.1-igkv:0.0319889
):0.0457567
,
(
V181RF-AACZ03015564.1-igkv:0.0615449
,
(
V42RF-CABD02196586.1-igkv:0.0706119
,
(
V153RF-ABGA01180644.1-igkv:0.0574812
,
(
V42RF-AQIB01144273.1-igkv:0.0501613
,
(
V32RF-JABR01076261.1-igkv:0.0655376
,
(
(
V243RF-AHZZ01110488.1-igkv:0.0285429
,
(
V45RF-AQIB01144274.1-igkv:0.0223721
,
(
(
V79RF-AHZZ01176978.1-igkv:0.0103522
,
(
V244RF-AHZZ01111138.1-igkv:-0
,
V247RF-AHZZ01111367.1-igkv:-0
):0.0103522
):0.00933593
,
(
V172RF-JYKQ01044654.1-igkv:0.0103522
,
V226RF-AQIA01017133.1-igkv:0.0103522
):0.00933593
):0.00268405
):0.00617072
):0.0179579
,
(
(
V104RF-ABGA01321409.1-igkv:0.010684
,
V190RF-ABGA01276916.1-igkv:0.010684
):0.0409919
,
(
(
V140RF-AQIB01156901.1-igkv:0.0103522
,
V227RF-AQIA01017135.1-igkv:0.0103522
):0.038506
,
(
V154RF-CABD02196521.1-igkv:0.0397909
,
(
V108RF-ABGA01356721.1-igkv:0.0334672
,
(
V38RF-CABD02196563.1-igkv:0.0320527
,
(
V40RF-ADFV01106195.1-igkv:0.0407173
,
(
V35RF-JABR01076263.1-igkv:0.0264584
,
V53RF-AGCE01134616.1-igkv:0.0264584
):0.0142589
):-0.00866463
):0.00141452
):0.00632375
):0.00906721
):0.00281772
):-0.00517513
):0.0190368
):-0.0153762
):0.00731989
):0.0131306
):-0.00906693
):0.0162007
):-0.000805698
):0.00791779
):-0.00532933
):0.0165907
):-0.011271
):0.00656629
,
(
(
V37RF-CABD02196554.1-igkv:0.0707125
,
(
V49RF-JABR01088351.1-igkv:0.0555878
,
V50RF-AQIA01017109.1-igkv:0.0555878
):0.0151247
):0.0175051
,
(
V194RF-AQIA01007908.1-igkv:0.0716987
,
(
(
V58RF-ADFV01138112.1-igkv:0.0264584
,
V102RF-ADFV01106214.1-igkv:0.0264584
):0.0255773
,
(
V166RF-CABD02379427.1-igkv:0.00513877
,
V56RF-AACZ03070936.1-igkv:0.00513877
):0.0468969
):0.0196631
):0.0165189
):0.00319678
):0.300874
,
(
V4RF-JZKE01218258.1-igkv:0.109276
,
(
(
(
V39RF-AQIB01144273.1-igkv:0.0724774
,
(
(
V48RF-AGCE01134612.1-igkv:0.0103522
,
V49RF-AGCE01134613.1-igkv:0.0103522
):0.0607361
,
(
(
V148RF-AACZ03151857.1-igkv:-0
,
V22RF-AJFE01012245.1-igkv:-0
):0.0631892
,
(
V103RF-ABGA01318850.1-igkv:0.056163
,
(
V110RF-ABGA01356724.1-igkv:0.0390417
,
(
(
V178RF-AACZ03015562.1-igkv:-0
,
V121RF-AJFE01047586.1-igkv:-0
):0.0264584
,
V129RF-ABGA01394068.1-igkv:0.0264584
):0.0125833
):0.0171213
):0.0070262
):0.00789911
):0.0013891
):0.00410111
,
(
(
V19RF-AQIB01144257.1-igkv:0.015642
,
V196RF-AQIA01017118.1-igkv:0.015642
):0.0408513
,
(
V140RF-ADFV01132961.1-igkv:0.0433051
,
V181RF-JYKQ01052440.1-igkv:0.0433051
):0.0131882
):0.0200852
):0.013931
,
(
(
V51RF-AQIA01017115.1-igkv:0.0863723
,
(
(
V36RF-AQIB01144265.1-igkv:0.0210101
,
V211RF-AQIA01017120.1-igkv:0.0210101
):0.0452672
,
(
V51RF-JABR01088351.1-igkv:0.0670679
,
(
(
V159RF-CABD02196556.1-igkv:0.0187181
,
(
V135RF-AACZ03151853.1-igkv:0.010571
,
V9RF-AJFE01012232.1-igkv:0.010571
):0.00814705
):0.046439
,
(
V36RF-ADFV01106193.1-igkv:0.0490141
,
(
(
V69RF-AHZZ01117753.1-igkv:0.0210101
,
V148RF-JYKQ01005018.1-igkv:0.0210101
):0.0182877
,
(
V34RF-AQIB01144265.1-igkv:0.0378333
,
(
V220RF-AQIA01017128.1-igkv:0.0401739
,
(
V215RF-AQIA01017123.1-igkv:0.0384465
,
(
V234RF-AHZZ01106331.1-igkv:0.0225152
,
(
V150RF-JYKQ01005022.1-igkv:0.0185515
,
(
V143RF-JYKQ01005012.1-igkv:0.010571
,
V209RF-AQIA01017120.1-igkv:0.010571
):0.00798045
):0.00396371
):0.0159313
):0.00172741
):-0.00234062
):0.00146449
):0.00971631
):0.016143
):0.00191087
):-0.000790641
):0.020095
):0.00378006
,
(
(
(
(
V214RF-AQIA01017123.1-igkv:0.00774547
,
(
V233RF-AHZZ01106331.1-igkv:0.00513877
,
V144RF-JYKQ01005013.1-igkv:0.00513877
):0.0026067
):0.02967
,
(
(
(
V50RF-AHZZ01104243.1-igkv:-0
,
V151RF-JYKQ01005026.1-igkv:-0
):0
,
V208RF-AQIA01017120.1-igkv:-0
):0.00530225
,
V33RF-AQIB01144265.1-igkv:0.00530225
):0.0321133
):0.0265751
,
(
V44RF-AQIB01144274.1-igkv:0.0564788
,
(
(
V30RF-JABR01076261.1-igkv:0.0267414
,
V33RF-JABR01076263.1-igkv:0.0267414
):0.0222939
,
(
(
V258RF-AHZZ01189923.1-igkv:0.0319889
,
V209RF-JYKQ01076937.1-igkv:0.0319889
):0.014508
,
(
V218RF-AQIA01017126.1-igkv:0.0527772
,
(
V34RF-JABR01076263.1-igkv:0.0603814
,
(
V43RF-CABD02196587.1-igkv:0.0436812
,
(
V112RF-ABGA01356729.1-igkv:0.0338127
,
(
V223RF-AQIA01017128.1-igkv:0.0271805
,
(
V62RF-AHZZ01109397.1-igkv:0.0264892
,
(
(
V145RF-JYKQ01005014.1-igkv:0.0156811
,
(
V232RF-AHZZ01106331.1-igkv:0.0103522
,
V38RF-AQIB01144269.1-igkv:0.0103522
):0.00532895
):0.00536882
,
(
V213RF-AQIA01017123.1-igkv:0.0103522
,
V217RF-AQIA01017125.1-igkv:0.0103522
):0.0106978
):0.00543927
):0.000691315
):0.0066322
):0.00986846
):0.0167002
):-0.0076042
):-0.00628034
):0.00253845
):0.00744346
):0.00751184
):0.0197807
,
(
(
V158RF-CABD02196553.1-igkv:0.0292236
,
(
V136RF-AACZ03151853.1-igkv:0.015642
,
V10RF-AJFE01012232.1-igkv:0.015642
):0.0135817
):0.0369968
,
(
(
V141RF-AACZ03151853.1-igkv:0.015642
,
V107RF-ABGA01342015.1-igkv:0.015642
):0.043909
,
(
(
V101RF-AHZZ01042084.1-igkv:0.0158068
,
V177RF-JYKQ01052440.1-igkv:0.0158068
):0.0563245
,
(
V38RF-ADFV01106195.1-igkv:0.0473851
,
(
(
V256RF-AHZZ01189918.1-igkv:0.0103522
,
V207RF-JYKQ01076935.1-igkv:0.0103522
):0.0402931
,
(
(
V49RF-AQIB01144276.1-igkv:0.0237342
,
(
V246RF-AHZZ01111138.1-igkv:0.015642
,
V249RF-AHZZ01111367.1-igkv:0.015642
):0.00809225
):0.00658187
,
(
V50RF-AQIB01144276.1-igkv:0.0321576
,
(
V41RF-JABR01076266.1-igkv:0.0237342
,
(
V37RF-JABR01076263.1-igkv:0.0210101
,
V42RF-JABR01076266.1-igkv:0.0210101
):0.00272415
):0.00842334
):-0.00184147
):0.0203292
):-0.0032602
):0.0247463
):-0.0125803
):0.00666938
):0.0175509
):0.00638107
):0.000357099
):0.0187663
):0.300874
):0.141934
):0.366877
):0.23732
,
(
(
V100RF-ADFV01106195.1-igkv:0.219402
,
(
(
(
V94RF-JABR01041956.1-igkv:0.0535755
,
(
V245RF-JYKQ01187338.1-igkv:0.019668
,
(
V220RF-AQIB01144282.1-igkv:0.00774547
,
(
V85RF-AHZZ01040804.1-igkv:0.00513877
,
V57RF-AQIA01017139.1-igkv:0.00513877
):0.0026067
):0.0119226
):0.0339074
):0.0535897
,
(
(
V37RF-ADFV01106193.1-igkv:0.0675488
,
(
V127RF-ABGA01394066.1-igkv:0.046708
,
(
V144RF-AACZ03151855.1-igkv:0.0104605
,
V17RF-AJFE01012236.1-igkv:0.0104605
):0.0362476
):0.0208408
):0.00546556
,
(
V33RF-ADFV01106193.1-igkv:0.0541165
,
(
(
V153RF-JYKQ01005032.1-igkv:0.0103522
,
V204RF-AQIA01017118.1-igkv:0.0103522
):0.0248226
,
(
V26RF-JABR01076261.1-igkv:0.0356409
,
(
V45RF-AHZZ01104241.1-igkv:0.0219317
,
V28RF-AQIB01144264.1-igkv:0.0219317
):0.0137092
):-0.000466123
):0.0189418
):0.0188979
):0.0341508
):0.00780508
,
(
(
(
V51RF-AQIB01144282.1-igkv:0.0363536
,
(
V255RF-AHZZ01185532.1-igkv:0.00535908
,
V123RF-JYKQ01187326.1-igkv:0.00535908
):0.0309945
):0.0637352
,
(
(
V51RF-AGCE01134616.1-igkv:0.0319889
,
V54RF-AGCE01134617.1-igkv:0.0319889
):0.0509624
,
(
(
V82RF-ABGA01285645.1-igkv:0.0165024
,
V105RF-ABGA01321410.1-igkv:0.0165024
):0.0613514
,
(
V179RF-AACZ03015562.1-igkv:0.0726538
,
(
V111RF-ABGA01356726.1-igkv:0.0444997
,
(
(
V150RF-AACZ03151858.1-igkv:0.0103522
,
V23RF-AJFE01012249.1-igkv:0.0103522
):0.0348598
,
(
(
V147RF-AACZ03151855.1-igkv:-0
,
V21RF-AJFE01012238.1-igkv:-0
):0.041544
,
(
V86RF-ABGA01290070.1-igkv:0.0438718
,
(
V44RF-CABD02196588.1-igkv:0.0416838
,
(
V85RF-ABGA01285651.1-igkv:0.0306123
,
(
V40RF-JABR01076265.1-igkv:0.0210101
,
V215RF-ABGA01315458.1-igkv:0.0210101
):0.00960222
):0.0110715
):0.00218802
):-0.00232782
):0.00366796
):-0.000712268
):0.0281541
):0.00520007
):0.00509741
):0.0171375
):0.011971
,
(
(
V43RF-AQIB01144273.1-igkv:0.054699
,
(
V219RF-AQIA01017126.1-igkv:0.0191273
,
(
V257RF-AHZZ01189922.1-igkv:0.00535908
,
V210RF-JYKQ01076937.1-igkv:0.00535908
):0.0137682
):0.0355717
):0.0591979
,
(
(
V71RF-AHZZ01117754.1-igkv:0.0319889
,
V37RF-AQIB01144269.1-igkv:0.0319889
):0.0802361
,
(
(
V216RF-AQIA01017123.1-igkv:0.0568227
,
(
V40RF-AQIB01144273.1-igkv:0.0347963
,
(
V235RF-AHZZ01106331.1-igkv:0.00513877
,
V141RF-JYKQ01005004.1-igkv:0.00513877
):0.0296576
):0.0220264
):0.0361413
,
(
V78RF-JYKQ01079834.1-igkv:0.0743467
,
(
(
V36RF-JABR01076263.1-igkv:0.0320311
,
(
V64RF-AHZZ01109398.1-igkv:0.0103522
,
V222RF-AQIA01017128.1-igkv:0.0103522
):0.0216789
):0.0265286
,
(
V51RF-JYKQ01051985.1-igkv:0.0589977
,
(
V222RF-AHZZ01104243.1-igkv:0.0560444
,
(
(
(
(
V76RF-AHZZ01143621.1-igkv:-0
,
V245RF-AHZZ01111138.1-igkv:-0
):0
,
V248RF-AHZZ01111367.1-igkv:-0
):0.0165024
,
V48RF-AQIB01144276.1-igkv:0.0165024
):0.0271655
,
(
V228RF-AQIA01017135.1-igkv:0.0436509
,
(
V240RF-AHZZ01107395.1-igkv:0.0409249
,
(
V78RF-AHZZ01169213.1-igkv:0.0533199
,
(
V256RF-AQIA01075132.1-igkv:0.0553872
,
(
(
V147RF-JYKQ01005018.1-igkv:-0
,
V149RF-JYKQ01005019.1-igkv:-0
):0.0394386
,
(
V224RF-AQIA01017128.1-igkv:0.0296561
,
(
V210RF-AQIA01017120.1-igkv:0.0212536
,
(
(
V70RF-AHZZ01117754.1-igkv:-0
,
V35RF-AQIB01144265.1-igkv:-0
):0.0210502
,
(
V38RF-JABR01076263.1-igkv:0.0103522
,
V142RF-JYKQ01005007.1-igkv:0.0103522
):0.010698
):0.000203455
):0.00840252
):0.00978241
):0.0159487
):-0.00206735
):-0.0123949
):0.00272596
):1.70469e-05
):0.0123765
):0.00295329
):-0.000438049
):0.015787
):0.0186173
):0.019261
):0.00167195
):-0.00183722
):0.00291058
):0.104432
):0.766121
,
(
(
V108RF-AGCE01134619.1-igkv:0.0575585
,
(
(
V36RF-CABD02196508.1-igkv:-0
,
V1RF-AACZ03015560.1-igkv:-0
):0.0107994
,
V65RF-ABGA01154383.1-igkv:0.0107994
):0.0467591
):0.293407
,
(
(
(
V32RF-ADFV01106193.1-igkv:0.0353997
,
(
(
V25RF-JABR01076260.1-igkv:0.0178517
,
(
V44RF-AHZZ01104241.1-igkv:0.0144702
,
(
V203RF-AQIA01017118.1-igkv:0.00782629
,
(
V27RF-AQIB01144264.1-igkv:0.00519213
,
V155RF-JYKQ01005033.1-igkv:0.00519213
):0.00263416
):0.00664393
):0.00338146
):0.0142188
,
(
V155RF-CABD02196542.1-igkv:0.0104605
,
(
V143RF-AACZ03151853.1-igkv:-0
,
V16RF-AJFE01012235.1-igkv:-0
):0.0104605
):0.0216101
):0.0033292
):0.0836457
,
(
V128RF-ABGA01394066.1-igkv:0.0359514
,
(
(
V48RF-AHZZ01104243.1-igkv:-0
,
V206RF-AQIA01017120.1-igkv:-0
):0.00530225
,
V31RF-AQIB01144265.1-igkv:0.00530225
):0.0306491
):0.0830941
):0.139081
,
(
(
V52RF-AQIB01144282.1-igkv:0.0470413
,
V177RF-AACZ03015561.1-igkv:0.0470413
):0.212873
,
(
(
V53RF-AQIB01144282.1-igkv:0.0203071
,
(
V230RF-AQIA01017139.1-igkv:0.0134156
,
(
V7RF-AHZZ01040804.1-igkv:0.00530225
,
V124RF-JYKQ01187337.1-igkv:0.00530225
):0.00811331
):0.00689158
):0.226448
,
(
(
V31RF-JABR01076261.1-igkv:0.0549762
,
V131RF-ABGA01394075.1-igkv:0.0549762
):0.176737
,
(
V106RF-AGCE01134619.1-igkv:0.0873507
,
(
V32RF-JZKE01097728.1-igkv:0.0702166
,
(
(
(
V5RF-JABR01020048.1-igkv:0.00974675
,
V61RF-AQIA01017150.1-igkv:0.00974675
):0.0125923
,
(
V222RF-AQIB01144284.1-igkv:0.0147555
,
(
V89RF-AHZZ01040808.1-igkv:0.00974675
,
V246RF-JYKQ01187347.1-igkv:0.00974675
):0.00500874
):0.00758353
):0.0253453
,
(
V0RF-AACZ03015560.1-igkv:0.0326955
,
(
V35RF-CABD02196505.1-igkv:0.0248784
,
V64RF-ABGA01154382.1-igkv:0.0248784
):0.00781709
):0.0149888
):0.0225324
):0.017134
):0.144362
):0.0150422
):0.0131597
):-0.00178817
):0.0928394
):0.766121
):0.280885
):0.602552
):0.418121
,
(
(
(
(
V16RF-JZKE01249932.1-iglv:-0
,
V17RF-JZKE01249932.1-iglv:-0
):0.140989
,
(
V194RF-AACZ03127321.1-iglv:-0
,
V110RF-AJFE01022798.1-iglv:-0
):0.140989
):0.213059
,
(
V63RF-ABDC01398089.1-iglv:0.172923
,
(
(
V101RF-AJFE01020628.1-iglv:0.0933124
,
(
(
(
V127RF-JABR01071862.1-iglv:0.0126039
,
(
V229RF-JYKQ01126579.1-iglv:0.00498507
,
V239RF-JYKQ01126586.1-iglv:0.00498507
):0.00761883
):0.00614718
,
(
V124RF-JABR01071861.1-iglv:0.0216965
,
(
V15RF-AQIA01007585.1-iglv:0.0190771
,
(
V60RF-AQIB01146122.1-iglv:0.0126223
,
(
(
V191RF-AHZZ01089506.1-iglv:0.0100403
,
V194RF-AHZZ01089507.1-iglv:0.0100403
):0
,
V66RF-AQIB01146122.1-iglv:0.0100403
):0.00258194
):0.00645486
):0.00261937
):-0.00294544
):0.0753036
,
(
(
V42RF-ADFV01126738.1-iglv:0.054952
,
(
V104RF-AJFE01020631.1-iglv:0.0378278
,
(
(
V63RF-AQIB01146122.1-iglv:0.0100403
,
V16RF-AQIA01007586.1-iglv:0.0100403
):0.0117037
,
(
V187RF-AHZZ01089506.1-iglv:0.0151675
,
V234RF-JYKQ01126581.1-iglv:0.0151675
):0.00657658
):0.0160837
):0.0171243
):0.0166449
,
(
(
V237RF-JYKQ01126585.1-iglv:0.0075127
,
(
V61RF-AQIB01146122.1-iglv:0.00498507
,
V21RF-AQIA01007587.1-iglv:0.00498507
):0.00252764
):0.0768593
,
(
(
(
V197RF-AHZZ01089508.1-iglv:0.0256441
,
V3RF-JABR01016432.1-iglv:0.0256441
):0.0199287
,
(
V242RF-JYKQ01126589.1-iglv:0.0420041
,
(
V58RF-AQIB01146122.1-iglv:0.0421084
,
(
V130RF-JABR01071862.1-iglv:0.0203681
,
V26RF-AQIA01007589.1-iglv:0.0203681
):0.0217403
):-0.000104338
):0.00356865
):0.0223659
,
(
V176RF-ABGA01252241.1-iglv:0.0533945
,
(
V105RF-AJFE01020632.1-iglv:0.047581
,
(
V52RF-CABD02231360.1-iglv:0.0203681
,
V170RF-AACZ03176953.1-iglv:0.0203681
):0.0272129
):0.00581345
):0.0145442
):0.0164334
):-0.0127751
):0.0224577
):-0.000742212
):0.0201953
,
(
V15RF-JZKE01249931.1-iglv:0.0814853
,
(
(
V13RF-ABDC01296165.1-iglv:0.00498507
,
V15RF-ABDC01296166.1-iglv:0.00498507
):0.05184
,
(
V140RF-ABDC01582683.1-iglv:0.0503791
,
(
V18RF-JZKE01249933.1-iglv:0.0203681
,
V79RF-JZKE01238800.1-iglv:0.0203681
):0.030011
):0.00644602
):0.0246602
):0.0320224
):0.0594148
):0.181125
):1.77272
,
(
(
(
V6RF-JABR01043229.1-iglv:0.0384297
,
V225RF-AQIB01146043.1-iglv:0.0384297
):0.41411
,
(
(
(
(
(
V64RF-CABD02231431.1-iglv:0.0104605
,
(
V132RF-AACZ03127143.1-iglv:-0
,
V94RF-AJFE01017581.1-iglv:-0
):0.0104605
):0.103332
,
(
V29RF-JZKE01249959.1-iglv:0.104607
,
(
(
(
(
V231RF-AHZZ01105201.1-iglv:0.0207916
,
V34RF-AQIA01009600.1-iglv:0.0207916
):0.0164123
,
V222RF-JYKQ01126546.1-iglv:0.0372039
):0.0300282
,
(
(
V266RF-AHZZ01198553.1-iglv:0.0154805
,
V13RF-AQIA01007576.1-iglv:0.0154805
):0.0527643
,
(
V227RF-AHZZ01105200.1-iglv:0.0602942
,
(
(
V75RF-AQIB01146137.1-iglv:-0
,
V78RF-AQIB01146138.1-iglv:-0
):0.0528424
,
(
(
V226RF-AHZZ01105199.1-iglv:0.0316513
,
V7RF-AQIA01007576.1-iglv:0.0316513
):0.0203505
,
(
V70RF-AQIB01146133.1-iglv:0.0522706
,
(
V114RF-JABR01071856.1-iglv:0.0530366
,
(
V227RF-JYKQ01126546.1-iglv:0.0344483
,
(
(
V118RF-JABR01071856.1-iglv:0.0207916
,
V10RF-AQIA01007576.1-iglv:0.0207916
):0.00538962
,
V224RF-JYKQ01126546.1-iglv:0.0261813
):0.008267
):0.0185884
):-0.000766024
):-0.000268787
):0.000840567
):0.00745181
):0.00795058
):-0.00101268
):0.0344954
,
(
(
V100RF-AGCE01112648.1-iglv:0.054378
,
V102RF-AGCE01112652.1-iglv:0.054378
):0.030103
,
(
V163RF-ABGA01252210.1-iglv:0.0876878
,
(
(
V51RF-ADFV01126759.1-iglv:0.0573765
,
(
(
V167RF-ABGA01252219.1-iglv:0.00508649
,
V168RF-ABGA01252219.1-iglv:0.00508649
):0.0449654
,
(
V122RF-AACZ03127131.1-iglv:0.0316926
,
(
V87RF-AJFE01010827.1-iglv:0.0207916
,
V90RF-AJFE01010828.1-iglv:0.0207916
):0.010901
):0.0183594
):0.00732454
):0.0138985
,
(
V166RF-ABGA01252218.1-iglv:0.055023
,
(
V61RF-CABD02231422.1-iglv:0.0154805
,
V126RF-AACZ03127139.1-iglv:0.0154805
):0.0395425
):0.016252
):0.0164129
):-0.00320689
):0.0172466
):0.00287911
):0.00918619
):0.0456931
,
(
(
(
V117RF-JABR01071856.1-iglv:0.0380123
,
V74RF-AQIB01146137.1-iglv:0.0380123
):0.0490108
,
(
V50RF-ADFV01126759.1-iglv:0.0380123
,
V173RF-ABGA01252220.1-iglv:0.0380123
):0.0490108
):0.0643566
,
(
(
(
V262RF-AHZZ01198551.1-iglv:0.0292823
,
(
V2RF-AQIA01007574.1-iglv:0.018524
,
(
V216RF-JYKQ01126545.1-iglv:0.0217366
,
(
V106RF-JABR01071855.1-iglv:0.015642
,
V81RF-AQIB01146141.1-iglv:0.015642
):0.00609465
):-0.00321262
):0.0107583
):0.0193799
,
(
V53RF-ADFV01126760.1-iglv:0.0429056
,
(
V62RF-CABD02231427.1-iglv:0.0261813
,
(
(
V128RF-AACZ03127139.1-iglv:-0
,
V96RF-AJFE01017584.1-iglv:-0
):0.0207916
,
V164RF-ABGA01252215.1-iglv:0.0207916
):0.00538962
):0.0167244
):0.00575666
):0.0567591
,
(
(
V175RF-ABGA01252221.1-iglv:0.0583236
,
(
V265RF-AHZZ01198553.1-iglv:0.0590831
,
(
V56RF-CABD02231415.1-iglv:0.0316926
,
(
V121RF-AACZ03127129.1-iglv:0.0207916
,
V124RF-AACZ03127135.1-iglv:0.0207916
):0.010901
):0.0273905
):-0.000759445
):0.0394022
,
(
V48RF-ADFV01126755.1-iglv:0.075639
,
(
V220RF-JYKQ01126546.1-iglv:0.046708
,
(
V55RF-CABD02231410.1-iglv:0.0104605
,
(
V120RF-AACZ03127129.1-iglv:-0
,
V91RF-AJFE01010829.1-iglv:-0
):0.0104605
):0.0362476
):0.028931
):0.0220867
):0.0076956
):0.0459582
):0.00810629
):0.0842531
,
(
(
V101RF-AGCE01112648.1-iglv:0.106528
,
(
V169RF-ABGA01252219.1-iglv:0.0511474
,
(
V113RF-JABR01071856.1-iglv:0.0485873
,
(
V58RF-CABD02231416.1-iglv:0.0472002
,
(
V263RF-AHZZ01198553.1-iglv:0.0372039
,
(
V76RF-AQIB01146137.1-iglv:0.0154805
,
V11RF-AQIA01007576.1-iglv:0.0154805
):0.0217234
):0.00999632
):0.00138703
):0.00256016
):0.0553807
):0.0871971
,
(
V28RF-JZKE01249958.1-iglv:0.161436
,
(
V23RF-ABDC01347843.1-iglv:0.125014
,
(
(
V125RF-ABDC01418360.1-iglv:0.0655039
,
(
V84RF-ABDC01449636.1-iglv:0.0237342
,
(
V26RF-ABDC01349230.1-iglv:0.00513877
,
V53RF-ABDC01384523.1-iglv:0.00513877
):0.0185954
):0.0417697
):0.0521115
,
(
V25RF-JZKE01249957.1-iglv:0.0685371
,
(
V24RF-ABDC01347844.1-iglv:0.0568527
,
V25RF-ABDC01349227.1-iglv:0.0568527
):0.0116843
):0.0490783
):0.0073982
):0.0364222
):0.0322894
):0.0500138
):0.129879
,
(
V181RF-ABGA01252248.1-iglv:0.342602
,
(
V172RF-AACZ03176965.1-iglv:0.261322
,
(
V46RF-ADFV01126741.1-iglv:0.0822662
,
(
V235RF-JYKQ01126581.1-iglv:0.0489801
,
(
V179RF-ABGA01252243.1-iglv:0.0391858
,
(
(
V50RF-CABD02231359.1-iglv:-0
,
V106RF-AJFE01020634.1-iglv:-0
):0.00498507
,
V169RF-AACZ03176953.1-iglv:0.00498507
):0.0342007
):0.00979426
):0.0332862
):0.179056
):0.0812804
):0.0310156
):0.0789214
):1.27954
,
(
(
(
(
V106RF-ABGA01335280.1-iglv:0.0369781
,
(
V48RF-CABD02231299.1-iglv:0.0205777
,
(
V195RF-AACZ03127321.1-iglv:-0
,
V111RF-AJFE01022798.1-iglv:-0
):0.0205777
):0.0164004
):0.0222582
,
(
V114RF-AGCE01147939.1-iglv:0.0521025
,
(
V136RF-JABR01077603.1-iglv:0.0340667
,
(
(
V29RF-AHZZ01097944.1-iglv:-0
,
V80RF-JYKQ01114545.1-iglv:-0
):0.0153224
,
V31RF-AQIA01007605.1-iglv:0.0153224
):0.0187443
):0.0180358
):0.00713376
):0.325464
,
(
(
(
(
V73RF-ABDC01418168.1-iglv:0.0201628
,
V105RF-ABDC01570800.1-iglv:0.0201628
):0.0645478
,
(
(
(
V22RF-ABDC01342328.1-iglv:0.0309971
,
V127RF-ABDC01425625.1-iglv:0.0309971
):0.01978
,
(
(
(
V137RF-ABDC01540867.1-iglv:-0
,
V141RF-ABDC01624510.1-iglv:-0
):0.0283206
,
(
V77RF-JZKE01238797.1-iglv:0.0203681
,
V78RF-JZKE01238799.1-iglv:0.0203681
):0.0079525
):0.00919853
,
(
V20RF-JZKE01249944.1-iglv:0.0364697
,
(
V14RF-ABDC01296165.1-iglv:0.0256441
,
(
V34RF-ABDC01359388.1-iglv:-0
,
V130RF-ABDC01465190.1-iglv:-0
):0.0256441
):0.0108257
):0.0010494
):0.013258
):0.0168435
,
(
V81RF-ABDC01442374.1-iglv:0.0650307
,
(
V62RF-ABDC01398089.1-iglv:0.0419423
,
V71RF-ABDC01417539.1-iglv:0.0419423
):0.0230884
):0.00258996
):0.0170899
):0.0305894
,
(
(
V182RF-ABGA01252248.1-iglv:0.0472058
,
(
V135RF-JABR01077601.1-iglv:0.0441319
,
(
(
(
V30RF-AHZZ01097949.1-iglv:0.00994053
,
V211RF-JYKQ01080923.1-iglv:0.00994053
):0.0102222
,
V30RF-AQIA01007600.1-iglv:0.0201628
):0.0274885
,
(
V55RF-AQIB01146122.1-iglv:0.0443335
,
(
V130RF-ADFV01132915.1-iglv:0.0364895
,
(
V27RF-AQIA01007590.1-iglv:0.0283987
,
(
V40RF-AHZZ01099970.1-iglv:0.0203681
,
V74RF-JYKQ01062966.1-iglv:0.0203681
):0.00803057
):0.00809082
):0.00784399
):0.00331778
):-0.00351942
):0.00307393
):0.0436121
,
(
(
(
V173RF-AACZ03176987.1-iglv:0.0153599
,
(
V49RF-CABD02231318.1-iglv:0.0101422
,
V192RF-AACZ03127313.1-iglv:0.0101422
):0.00521776
):0.0105499
,
V109RF-AJFE01022796.1-iglv:0.0259099
):0.0393183
,
(
V133RF-JABR01077601.1-iglv:0.0368125
,
V183RF-ABGA01252249.1-iglv:0.0368125
):0.0284157
):0.0255898
):0.0244821
):0.192246
,
(
(
V123RF-AACZ03127131.1-iglv:-0
,
V88RF-AJFE01010827.1-iglv:-0
):0.297429
,
(
(
(
V264RF-AHZZ01198553.1-igkv:0.00498507
,
V12RF-AQIA01007576.1-igkv:0.00498507
):0.0502898
,
(
V225RF-AHZZ01105199.1-iglv:0.0372039
,
V77RF-AQIB01146138.1-iglv:0.0372039
):0.0180709
):0.0846123
,
(
(
V24RF-JZKE01249956.1-iglv:0.0100403
,
V26RF-JZKE01249957.1-iglv:0.0100403
):0.127222
,
(
(
V0RF-AQIA01007569.1-iglv:0.0193412
,
(
V84RF-AQIB01146141.1-iglv:0.0183142
,
(
V260RF-AHZZ01198550.1-iglv:0.00524662
,
V219RF-JYKQ01126545.1-iglv:0.00524662
):0.0130676
):0.00102694
):0.0895904
,
(
(
V107RF-JABR01071855.1-iglv:0.0440117
,
(
V261RF-AHZZ01198551.1-iglv:0.0453361
,
(
V73RF-AQIB01146136.1-iglv:0.0352028
,
(
V49RF-ADFV01126756.1-iglv:0.0363113
,
(
(
V69RF-AQIB01146133.1-iglv:0.0154805
,
V33RF-AQIA01009600.1-iglv:0.0154805
):0.0114345
,
(
(
V127RF-AACZ03127139.1-iglv:0.0100403
,
(
V215RF-AACZ03191230.1-iglv:-0
,
V98RF-AJFE01017586.1-iglv:-0
):0.0100403
):0.0215588
,
(
V221RF-JYKQ01126546.1-iglv:0.0208309
,
(
V230RF-AHZZ01105201.1-iglv:0.0102461
,
V104RF-JABR01071855.1-iglv:0.0102461
):0.0105848
):0.0107682
):-0.00468405
):0.00939627
):-0.00110856
):0.0101333
):-0.00132436
):0.0226086
,
(
(
V172RF-ABGA01252219.1-iglv:0.0296589
,
(
V206RF-AACZ03177116.1-iglv:0.0337932
,
(
V170RF-ABGA01252219.1-iglv:0.0203681
,
V171RF-ABGA01252219.1-iglv:0.0203681
):0.0134251
):-0.00413432
):0.0469958
,
(
V161RF-ABGA01252206.1-iglv:0.0828963
,
(
(
V105RF-JABR01071855.1-iglv:0.0154805
,
V111RF-JABR01071856.1-iglv:0.0154805
):0.0467216
,
(
V89RF-AJFE01010827.1-iglv:0.0746999
,
(
V63RF-CABD02231427.1-iglv:0.0549868
,
(
V165RF-ABGA01252216.1-iglv:0.0677783
,
(
(
V130RF-AACZ03127139.1-iglv:0.0100403
,
V97RF-AJFE01017584.1-iglv:0.0100403
):0.0472909
,
(
V225RF-JYKQ01126546.1-iglv:0.0541739
,
(
V60RF-CABD02231421.1-iglv:0.0494807
,
(
(
V228RF-JYKQ01126546.1-iglv:0.0205799
,
(
V80RF-AQIB01146140.1-iglv:0.0102461
,
V5RF-AQIA01007575.1-iglv:0.0102461
):0.0103338
):0.0122186
,
(
(
V83RF-AQIB01146141.1-iglv:0.0102461
,
V1RF-AQIA01007574.1-iglv:0.0102461
):0.0240161
,
(
V8RF-AQIA01007576.1-iglv:0.0358177
,
(
V59RF-CABD02231419.1-iglv:0.0447575
,
(
V116RF-JABR01071856.1-iglv:0.037868
,
(
(
V259RF-AHZZ01198550.1-iglv:-0
,
V218RF-JYKQ01126545.1-iglv:-0
):0.0221685
,
(
V223RF-AHZZ01105198.1-iglv:0.0275787
,
(
V79RF-AQIB01146140.1-iglv:0.0179451
,
(
(
V267RF-AHZZ01198553.1-iglv:0.0100403
,
V215RF-JYKQ01126545.1-iglv:0.0100403
):0.000205752
,
V4RF-AQIA01007574.1-iglv:0.0102461
):0.00769899
):0.00963362
):-0.00541022
):0.0156996
):0.00688946
):-0.0089398
):-0.00155554
):-0.00146365
):0.0166821
):0.00469328
):0.00315733
):0.010447
):-0.0127915
):0.0197131
):-0.0124978
):0.0206942
):-0.00624162
):-0.0100343
):0.0423112
):0.0283307
):0.00262481
):0.157542
):0.0101173
):0.0771539
):0.839358
,
(
V35RF-AQIA01009608.1-iglv:0.204984
,
(
(
(
V131RF-JABR01071862.1-iglv:0.101754
,
(
V119RF-JABR01071859.1-iglv:0.0490322
,
(
(
(
V192RF-AHZZ01089506.1-iglv:0.0100403
,
V14RF-AQIA01007584.1-iglv:0.0100403
):0.0156037
,
V67RF-AQIB01146123.1-iglv:0.0256441
):0
,
V230RF-JYKQ01126579.1-iglv:0.0256441
):0.0233882
):0.0527218
):0.0235592
,
(
V103RF-AGCE01112674.1-iglv:0.116247
,
(
(
(
V240RF-JYKQ01126586.1-iglv:0.01795
,
(
V24RF-AQIA01007588.1-iglv:0.0177678
,
(
V195RF-AHZZ01089507.1-iglv:0.0151675
,
(
V77RF-JABR01189674.1-iglv:-0
,
V128RF-JABR01071862.1-iglv:-0
):0.0151675
):0.00260033
):0.00018226
):0.0517247
,
(
V62RF-AQIB01146122.1-iglv:0.0426831
,
(
V4RF-JABR01016432.1-iglv:0.0463508
,
(
V186RF-AHZZ01089506.1-iglv:0.0364697
,
(
V238RF-JYKQ01126585.1-iglv:0.0256441
,
V22RF-AQIA01007587.1-iglv:0.0256441
):0.0108257
):0.00988102
):-0.00366766
):0.0269916
):0.00213301
,
(
(
(
V102RF-AJFE01020631.1-iglv:0.0230254
,
(
V171RF-AACZ03176953.1-iglv:0.0256826
,
(
V53RF-CABD02231362.1-iglv:0.0100403
,
V54RF-CABD02231364.1-iglv:0.0100403
):0.0156423
):-0.00265726
):0.02454
,
(
V43RF-ADFV01126738.1-iglv:0.0364697
,
(
V47RF-ADFV01126742.1-iglv:0.0203681
,
V131RF-ADFV01132918.1-iglv:0.0203681
):0.0161016
):0.0110957
):0.0102125
,
(
(
V177RF-ABGA01252241.1-iglv:0.0203681
,
V180RF-ABGA01252243.1-iglv:0.0203681
):0.0347533
,
(
V125RF-JABR01071861.1-iglv:0.0475597
,
(
V59RF-AQIB01146122.1-iglv:0.0323552
,
(
V243RF-JYKQ01126589.1-iglv:0.0230061
,
(
V198RF-AHZZ01089508.1-iglv:0.0100403
,
V23RF-AQIA01007588.1-iglv:0.0100403
):0.0129657
):0.00934909
):0.0152046
):0.00756162
):0.00265652
):0.0140299
):0.0444395
):0.00906599
):0.0191623
,
(
(
V76RF-JZKE01238797.1-iglv:0.0855478
,
(
(
V65RF-ABDC01399713.1-iglv:-0
,
V94RF-ABDC01498106.1-iglv:-0
):0.0837387
,
(
V19RF-ABDC01318812.1-iglv:0.062685
,
(
V18RF-ABDC01318810.1-iglv:0.0368125
,
(
V76RF-ABDC01422153.1-iglv:-0
,
V86RF-ABDC01466438.1-iglv:-0
):0.0368125
):0.0258725
):0.0210537
):0.00180911
):0.0630856
,
(
(
V45RF-ADFV01126741.1-iglv:0.0777455
,
(
V188RF-AHZZ01089506.1-iglv:0.0596283
,
V17RF-AQIA01007586.1-iglv:0.0596283
):0.0181171
):0.0501219
,
(
V109RF-AGCE01135277.1-iglv:0.121174
,
(
(
V122RF-JABR01071860.1-iglv:0.0604732
,
(
(
V190RF-AHZZ01089506.1-iglv:0.0205777
,
V233RF-JYKQ01126580.1-iglv:0.0205777
):0.032745
,
(
(
V20RF-AQIA01007586.1-iglv:0.0313612
,
(
V123RF-JABR01071860.1-iglv:0.0203681
,
V129RF-JABR01071862.1-iglv:0.0203681
):0.0109931
):0.0217592
,
(
(
V189RF-AHZZ01089506.1-iglv:0.00503527
,
V19RF-AQIA01007586.1-iglv:0.00503527
):0.0467346
,
(
(
(
V241RF-JYKQ01126589.1-iglv:0.0101422
,
V25RF-AQIA01007589.1-iglv:0.0101422
):0.0143355
,
(
V41RF-AHZZ01099973.1-iglv:0.0151675
,
V100RF-AJFE01020628.1-iglv:0.0151675
):0.00931022
):0.0126936
,
(
V232RF-JYKQ01126580.1-iglv:0.0368539
,
(
V56RF-AQIB01146122.1-iglv:0.0313208
,
V65RF-AQIB01146122.1-iglv:0.0313208
):0.00553306
):0.000317365
):0.0145987
):0.00135045
):0.000202361
):0.00715042
):-0.00262627
,
(
V18RF-AQIA01007586.1-iglv:0.0421646
,
(
V64RF-AQIB01146122.1-iglv:0.0313208
,
V236RF-JYKQ01126581.1-iglv:0.0313208
):0.0108438
):0.0156822
):0.0633274
):0.00669307
):0.020766
):-0.00415784
):0.0605086
):0.839358
):0.440185
):0.493173
):0.294963
):3.57642
,
(
(
(
(
(
V9RF-JABR01052882.1-trgv:0.0201628
,
V1RF-AQIB01018215.1-trgv:0.0201628
):0.0052209
,
(
V2RF-JYKQ01003191.1-trgv:-0
,
V64RF-AQIA01046502.1-trgv:-0
):0.0253837
):0.0573347
,
(
V98RF-ADFV01046571.1-trgv:0.0664258
,
(
(
V2RF-AACZ03050973.1-trgv:0.00994053
,
V29RF-AJFE01038666.1-trgv:0.00994053
):0.046748
,
(
V89RF-ABGA01290201.1-trgv:0.0485931
,
(
(
V90RF-ABGA01290202.1-trgv:0.00493586
,
V147RF-ABGA01132346.1-trgv:0.00493586
):0.0178747
,
(
V163RF-CABD02337338.1-trgv:0.0150156
,
V27RF-AJFE01038664.1-trgv:0.0150156
):0.00779492
):0.0257826
):0.00809541
):0.00973733
):0.0162925
):0.0627027
,
(
V99RF-ADFV01046573.1-trgv:0.128379
,
(
(
V165RF-CABD02337341.1-trgv:0.0306801
,
V28RF-AJFE01038665.1-trgv:0.0306801
):0.03915
,
(
V88RF-ABGA01290201.1-trgv:0.0570661
,
(
V65RF-AQIA01046502.1-trgv:0.0281093
,
(
(
V0RF-AQIB01018214.1-trgv:0.0175892
,
(
V1RF-AHZZ01030316.1-trgv:0.00493586
,
V63RF-AQIA01046502.1-trgv:0.00493586
):0.0126533
):0.00919799
,
(
V2RF-AQIB01018217.1-trgv:0.0150156
,
V1RF-JYKQ01003191.1-trgv:0.0150156
):0.0117716
):0.00132208
):0.0289569
):0.012764
):0.0585488
):0.0170422
):5.05657
,
(
(
(
(
V148RF-ADFV01192057.1-trdv:0.801263
,
(
(
(
(
V20RF-CABD02105611.1-trdv:0.0376681
,
(
(
(
V0RF-AJFE01000016.1-trdv:-0
,
V75RF-AJFE01069977.1-trdv:-0
):0
,
V85RF-AJFE01010527.1-trdv:-0
):0.0238154
,
(
V85RF-AACZ03097622.1-trdv:0.015642
,
V209RF-AACZ03179105.1-trdv:0.015642
):0.00817346
):0.0138526
):0.0531828
,
(
(
V210RF-AHZZ01093953.1-trav:0.00513877
,
(
V167RF-JYKQ01026665.1-trav:-0
,
V204RF-JYKQ01066669.1-trav:-0
):0.00513877
):0.0439563
,
V166RF-JYKQ01026663.1-trav:0.0490951
):0.0417558
):0.115633
,
(
V93RF-ABDC01497734.1-trdv:0.179879
,
(
V42RF-JZKE01143873.1-trdv:0.11939
,
V44RF-JZKE01143874.1-trdv:0.11939
):0.0604888
):0.0266057
):0.142465
,
(
(
V48RF-JZKE01143891.1-trav:0.128543
,
(
V86RF-AGCE01026527.1-trdv:0.0913359
,
(
V118RF-ABGA01386446.1-trdv:0.0633022
,
(
(
V16RF-CABD02105598.1-trdv:0.0207916
,
(
V81RF-AACZ03097619.1-trdv:-0
,
V71RF-AJFE01069976.1-trdv:-0
):0.0207916
):0.0344583
,
(
V79RF-ADFV01192039.1-trdv:0.0553086
,
(
V35RF-AHZZ01098200.1-trav:0.0344488
,
(
(
V71RF-JYKQ01054957.1-trav:0.0102461
,
V140RF-AQIA01064149.1-trav:0.0102461
):0.0186702
,
(
V187RF-JABR01098598.1-trav:0.0261813
,
V205RF-AQIB01128643.1-trav:0.0261813
):0.00273504
):0.00553248
):0.0208598
):-5.86361e-05
):0.00805228
):0.0280337
):0.0372074
):0.180323
,
(
(
V78RF-AGCE01026520.1-trdv:0.0764495
,
(
(
V77RF-AGCE01026520.1-trdv:0.0482554
,
(
V196RF-AQIB01128637.1-trav:0.037301
,
(
(
V172RF-JABR01098590.1-trav:0.0251575
,
(
V120RF-JYKQ01135388.1-trav:0.0129163
,
(
V3RF-AHZZ01035404.1-trav:0.00513877
,
V152RF-AQIA01064166.1-trav:0.00513877
):0.00777758
):0.0122411
):-0.000744846
,
(
V95RF-ADFV01192049.1-trav:0.018326
,
(
V60RF-AACZ03095317.1-trav:0.0051257
,
(
(
V27RF-CABD02105626.1-trav:-0
,
V114RF-AJFE01024276.1-trav:-0
):0
,
V219RF-ABGA01321070.1-trav:-0
):0.0051257
):0.0132003
):0.0060866
):0.0128884
):0.0109543
):0.0105484
,
(
V33RF-JZKE01143868.1-trav:0.057365
,
(
(
V173RF-JABR01098592.1-trdv:0.0292447
,
(
V151RF-AQIA01064166.1-trdv:0.0264995
,
(
(
V2RF-AHZZ01035404.1-trdv:0.0103522
,
V119RF-JYKQ01135385.1-trdv:0.0103522
):0.0106579
,
V195RF-AQIB01128637.1-trdv:0.0210101
):0.00548942
):0.00274523
):0.00560744
,
(
V94RF-ADFV01192049.1-trdv:0.0334137
,
(
V220RF-ABGA01321072.1-trdv:0.0129971
,
(
V26RF-CABD02105626.1-trdv:0.00513877
,
V59RF-AACZ03095317.1-trdv:0.00513877
):0.0078583
):0.0204166
):0.00143847
):0.0225128
):0.00143875
):0.0176458
):0.173077
,
(
(
(
V194RF-JABR01098600.1-trav:0.0326908
,
(
V215RF-AQIB01128644.1-trav:0.0224328
,
(
V65RF-JYKQ01054942.1-trav:0.0129971
,
(
V59RF-AHZZ01107545.1-trav:0.00513877
,
V134RF-AQIA01064146.1-trav:0.00513877
):0.0078583
):0.00943574
):0.010258
):0.02006
,
(
V73RF-ADFV01192039.1-trav:0.0386132
,
(
V121RF-ABGA01387831.1-trav:0.0331008
,
(
(
V201RF-AACZ03171512.1-trav:-0
,
V66RF-AJFE01069976.1-trav:-0
):0.0181361
,
(
V12RF-CABD02105589.1-trav:0.0154805
,
V76RF-AACZ03097618.1-trav:0.0154805
):0.00265555
):0.0149648
):0.00551236
):0.0141375
):0.080633
,
(
V66RF-JZKE01143915.1-trdv:0.0992023
,
(
V62RF-JZKE01143910.1-trav:0.0558541
,
(
(
V50RF-ABDC01379531.1-trav:0.0428411
,
V51RF-JZKE01143895.1-trav:0.0428411
):0.00572393
,
V55RF-JZKE01143896.1-trav:0.048565
):0.00728906
):0.0433483
):0.0341814
):0.116142
):0.0593406
):0.0400828
):0.452314
):0.208789
,
(
V74RF-AGCE01026519.1-trav:1.02726
,
(
(
(
(
V22RF-CABD02105614.1-trav:0.00513877
,
(
V87RF-AACZ03097624.1-trav:-0
,
V202RF-AACZ03171676.1-trav:-0
):0.00513877
):0.0152153
,
(
V146RF-AQIA01064165.1-trav:0.018326
,
(
V144RF-AQIA01064159.1-trav:0.0129971
,
(
V205RF-AHZZ01093949.1-trav:0.0103522
,
V176RF-JABR01098595.1-trav:0.0103522
):0.0026449
):0.00532895
):0.00202808
):0.496388
,
(
(
V198RF-AACZ03171059.1-trav:0.0191273
,
(
V24RF-CABD02105616.1-trav:0.0163229
,
V57RF-AACZ03095312.1-trav:0.0163229
):0.00280443
):0.0400131
,
(
V208RF-AHZZ01093949.1-trav:0.0276281
,
V148RF-AQIA01064166.1-trav:0.0276281
):0.0315123
):0.457602
):0.214085
,
(
(
V7RF-CABD02105584.1-trav:0.0247799
,
(
V59RF-JYKQ01054940.1-trav:0.00758872
,
(
V83RF-AHZZ01198216.1-trav:0.00503527
,
(
V197RF-JABR01098603.1-trav:-0
,
V127RF-AQIA01064144.1-trav:-0
):0.00503527
):0.00255345
):0.0171912
):0.646589
,
(
V71RF-JZKE01143916.1-trav:0.54214
,
(
V59RF-JZKE01143910.1-trav:0.0936735
,
(
V141RF-ABGA01083939.1-trav:0.00923993
,
(
V59RF-AJFE01069975.1-trav:0.00790882
,
(
V6RF-CABD02105581.1-trav:0.00524662
,
V69RF-AACZ03097613.1-trav:0.00524662
):0.00266221
):0.0013311
):0.0844336
):0.448467
):0.129228
):0.0594586
):0.296435
):-0.0172102
):2.38142
,
(
(
(
(
(
V193RF-JABR01098600.1-trav:0.0228743
,
(
V133RF-AQIA01064146.1-trav:0.0132731
,
(
(
V58RF-AHZZ01107544.1-trav:-0
,
V214RF-AQIB01128644.1-trav:-0
):0.00524662
,
V64RF-JYKQ01054942.1-trav:0.00524662
):0.00802648
):0.00960124
):0.0388175
,
(
V136RF-ABGA01083932.1-trav:0.034122
,
(
V72RF-ADFV01192038.1-trav:0.0242458
,
(
V11RF-CABD02105589.1-trav:0.00524662
,
V65RF-AJFE01069976.1-trav:0.00524662
):0.0189992
):0.00987621
):0.0275698
):0.111845
,
(
V54RF-JZKE01143896.1-trav:0.106535
,
(
V80RF-ABDC01440241.1-trav:0.084581
,
(
V50RF-JZKE01143895.1-trav:0.0159752
,
V61RF-JZKE01143910.1-trav:0.0159752
):0.0686058
):0.0219537
):0.067002
):0.488946
,
(
(
(
V100RF-ABDC01533414.1-trav:0.0513366
,
V49RF-JZKE01143893.1-trav:0.0513366
):0.111863
,
(
V84RF-AGCE01026527.1-trav:0.126061
,
(
V77RF-ADFV01192039.1-trav:0.0540335
,
(
(
(
V15RF-CABD02105596.1-trav:-0
,
V116RF-ABGA01386446.1-trav:-0
):0.00535908
,
(
V80RF-AACZ03097619.1-trav:-0
,
V70RF-AJFE01069976.1-trav:-0
):0.00535908
):0.0269965
,
(
V185RF-JABR01098598.1-trav:0.0255144
,
(
V138RF-AQIA01064148.1-trav:0.014942
,
(
V218RF-AQIB01128644.1-trav:0.0135611
,
(
V33RF-AHZZ01098200.1-trav:0.00535908
,
V69RF-JYKQ01054953.1-trav:0.00535908
):0.00820203
):0.00138088
):0.0105724
):0.00684112
):0.0216779
):0.0720277
):0.0371387
):0.208547
,
(
V4RF-CABD02105575.1-trav:0.164324
,
V48RF-ABDC01377655.1-trav:0.164324
):0.207423
):0.290735
):1.92126
,
(
(
(
V110RF-CABD02377030.1-trbv:0.0261813
,
(
V55RF-AACZ03067007.1-trbv:-0
,
V80RF-AJFE01104369.1-trbv:-0
):0.0261813
):1.30881
,
(
(
V82RF-AGCE01026522.1-trav:0.0470321
,
(
V165RF-JYKQ01026655.1-trav:0.0345216
,
(
V177RF-JABR01098595.1-trav:0.0245099
,
(
(
V87RF-ADFV01192042.1-trav:0.00530225
,
V23RF-CABD02105615.1-trav:0.00530225
):0.0108658
,
(
V88RF-AACZ03097624.1-trav:0.00530225
,
V212RF-AACZ03179105.1-trav:0.00530225
):0.0108658
):0.00834193
):0.0100117
):0.0125105
):1.07773
,
(
(
V111RF-CABD02105639.1-trdv:0.0101422
,
(
V186RF-AACZ03095321.1-trdv:-0
,
V25RF-AJFE01024273.1-trdv:-0
):0.0101422
):0.837115
,
(
(
(
V146RF-ABGA01113133.1-trav:0.0316235
,
(
V2RF-CABD02105568.1-trav:0.0260529
,
(
V60RF-ADFV01192035.1-trav:0.0198766
,
(
V122RF-AQIA01064137.1-trav:0.00782629
,
(
V121RF-AHZZ01044061.1-trav:0.00519213
,
V55RF-JYKQ01054925.1-trav:0.00519213
):0.00263416
):0.0120503
):0.00617633
):0.00557058
):0.24945
,
(
(
V89RF-AGCE01026530.1-trav:0.0288493
,
(
V68RF-ADFV01192037.1-trav:0.0253854
,
(
(
V71RF-AACZ03097613.1-trav:-0
,
V61RF-AJFE01069975.1-trav:-0
):0.01852
,
(
(
V192RF-JABR01098600.1-trav:-0
,
V213RF-AQIB01128644.1-trav:-0
):0.00519213
,
V132RF-AQIA01064146.1-trav:0.00519213
):0.0133278
):0.00686539
):0.00346396
):0.190323
,
(
V55RF-ABDC01388284.1-trav:0.167988
,
(
(
V60RF-JYKQ01054940.1-trav:0.0337172
,
(
V198RF-JABR01098603.1-trav:0.0335301
,
(
V63RF-JYKQ01054942.1-trav:0.031158
,
(
V212RF-AQIB01128644.1-trav:0.0223076
,
(
V191RF-JABR01098600.1-trav:0.0205961
,
(
V131RF-AQIA01064146.1-trav:0.0144902
,
(
V57RF-AHZZ01107544.1-trav:0.0131336
,
(
V84RF-AHZZ01198216.1-trav:0.00519213
,
V128RF-AQIA01064144.1-trav:0.00519213
):0.0079415
):0.00135658
):0.00610587
):0.00171149
):0.00885046
):0.00237208
):0.000187092
):0.0273993
,
(
(
V74RF-AACZ03097614.1-trav:-0
,
V64RF-AJFE01069975.1-trav:-0
):0.0680946
,
(
V143RF-ABGA01083939.1-trav:0.0520096
,
(
V8RF-CABD02105586.1-trav:0.0513099
,
(
V137RF-ABGA01083934.1-trav:0.0323768
,
(
V67RF-ADFV01192037.1-trav:0.0267414
,
V71RF-ADFV01192038.1-trav:0.0267414
):0.00563541
):0.018933
):0.000699759
):0.016085
):-0.00697811
):0.106872
):0.0511842
):0.0619012
):0.175104
,
(
(
(
V63RF-JZKE01143913.1-trav:0.0956158
,
(
V128RF-ABDC01454736.1-trav:0.083988
,
(
V58RF-JZKE01143903.1-trav:0.0735224
,
(
(
(
(
V60RF-AHZZ01107545.1-trav:-0
,
V66RF-JYKQ01054942.1-trav:-0
):0.00524662
,
V216RF-AQIB01128644.1-trav:0.00524662
):0
,
V135RF-AQIA01064146.1-trav:0.00524662
):0.0398078
,
(
V74RF-ADFV01192039.1-trav:0.0312722
,
(
V122RF-ABGA01387833.1-trav:0.0242458
,
(
V13RF-CABD02105590.1-trav:0.00524662
,
(
V77RF-AACZ03097618.1-trav:-0
,
V67RF-AJFE01069976.1-trav:-0
):0.00524662
):0.0189992
):0.00702643
):0.0137822
):0.028468
):0.0104656
):0.0116278
):0.0834607
,
(
V72RF-JZKE01143916.1-trav:0.145102
,
(
V96RF-AGCE01026534.1-trav:0.0984021
,
(
(
(
V68RF-AACZ03097613.1-trav:0.00524662
,
V58RF-AJFE01069975.1-trav:0.00524662
):0.0121309
,
(
V140RF-ABGA01083939.1-trav:0.00790882
,
(
V64RF-ADFV01192035.1-trav:0.00524662
,
V5RF-CABD02105579.1-trav:0.00524662
):0.00266221
):0.0094687
):0.0233317
,
(
V202RF-JABR01098604.1-trav:0.0326861
,
(
(
V209RF-AQIB01128644.1-trav:-0
,
V57RF-JYKQ01054940.1-trav:-0
):0.0159752
,
V125RF-AQIA01064138.1-trav:0.0159752
):0.0167109
):0.00802311
):0.0576928
):0.0466997
):0.0339747
):0.175933
,
(
V46RF-JZKE01143890.1-trav:0.223196
,
(
V101RF-ABDC01533415.1-trav:0.11607
,
(
V85RF-AGCE01026527.1-trav:0.0478993
,
(
V78RF-ADFV01192039.1-trav:0.0393136
,
(
V117RF-ABGA01386446.1-trav:0.032365
,
(
V186RF-JABR01098598.1-trav:0.0287781
,
(
V34RF-AHZZ01098200.1-trav:0.0134156
,
(
V204RF-AQIB01128643.1-trav:0.00530225
,
(
V70RF-JYKQ01054957.1-trav:-0
,
V139RF-AQIA01064149.1-trav:-0
):0.00530225
):0.00811331
):0.0153625
):0.00358693
):0.0069486
):0.00858564
):0.0681709
):0.107126
):0.131814
):0.101168
):0.39108
):0.277505
):0.210232
):1.85317
,
(
(
(
(
V74RF-ABDC01418428.1-trav:0.185385
,
(
V65RF-JZKE01143915.1-trav:0.151949
,
(
V90RF-AGCE01026530.1-trav:0.101225
,
(
(
V72RF-AACZ03097614.1-trav:0.00530225
,
V62RF-AJFE01069975.1-trav:0.00530225
):0.0413828
,
(
V138RF-ABGA01083937.1-trav:0.0309122
,
(
V196RF-JABR01098601.1-trav:0.0175338
,
(
(
V55RF-AHZZ01107544.1-trav:0.010684
,
V129RF-AQIA01064146.1-trav:0.010684
):0.00546317
,
V61RF-JYKQ01054942.1-trav:0.0161471
):0.00138667
):0.0133783
):0.0157729
):0.0545399
):0.050724
):0.0334362
):0.106002
,
(
(
V47RF-ABDC01377653.1-trav:0.0693477
,
V70RF-JZKE01143916.1-trav:0.0693477
):0.147277
,
(
V95RF-AGCE01026534.1-trav:0.116939
,
(
(
V145RF-ABGA01113130.1-trav:0.0294821
,
(
V3RF-CABD02105570.1-trav:0.0316832
,
(
V61RF-ADFV01192035.1-trav:0.0161471
,
(
V65RF-AACZ03097612.1-trav:0.00530225
,
V54RF-AJFE01069975.1-trav:0.00530225
):0.0108449
):0.0155361
):-0.0022011
):0.0159195
,
(
(
V80RF-AHZZ01198213.1-trav:0.00530225
,
V56RF-JYKQ01054933.1-trav:0.00530225
):0.0206267
,
(
V123RF-AQIA01064137.1-trav:0.0161889
,
(
V199RF-JABR01098604.1-trav:0.010684
,
V207RF-AQIB01128644.1-trav:0.010684
):0.00550491
):0.00974011
):0.0194726
):0.071537
):0.0996864
):0.0747622
):0.245999
,
(
(
(
V54RF-ABDC01388284.1-trav:0.130772
,
(
(
V51RF-ABDC01379531.1-trav:-0
,
V91RF-ABDC01491653.1-trav:-0
):0.0791211
,
(
V52RF-JZKE01143895.1-trav:0.0359514
,
(
V56RF-JZKE01143896.1-trav:0.0161471
,
V57RF-JZKE01143902.1-trav:0.0161471
):0.0198042
):0.0431697
):0.0516505
):0.0671954
,
(
(
V87RF-AGCE01026529.1-trav:0.086339
,
(
V123RF-ABGA01387833.1-trav:0.0521513
,
(
(
V188RF-JABR01098599.1-trav:0.0207753
,
(
V31RF-AHZZ01098200.1-trav:0.0200895
,
(
V67RF-JYKQ01054942.1-trav:0.00790882
,
(
V211RF-AQIB01128644.1-trav:0.00524662
,
(
V217RF-AQIB01128644.1-trav:-0
,
V136RF-AQIA01064146.1-trav:-0
):0.00524662
):0.00266221
):0.0121807
):0.000685729
):0.0273796
,
(
V75RF-ADFV01192039.1-trav:0.0298583
,
(
(
V14RF-CABD02105592.1-trav:0.010571
,
V78RF-AACZ03097619.1-trav:0.010571
):0.00540413
,
V68RF-AJFE01069976.1-trav:0.0159752
):0.0138832
):0.0182965
):0.00399641
):0.0341877
):0.0873924
,
(
V93RF-AGCE01026531.1-trav:0.15141
,
(
(
V70RF-ADFV01192038.1-trav:0.0316832
,
(
V73RF-AACZ03097614.1-trav:0.0134156
,
(
V10RF-CABD02105588.1-trav:0.00530225
,
V63RF-AJFE01069975.1-trav:0.00530225
):0.00811331
):0.0182677
):0.0467134
,
(
V91RF-AGCE01026530.1-trav:0.0615193
,
(
V190RF-JABR01098600.1-trav:0.0408098
,
(
V130RF-AQIA01064146.1-trav:0.0191273
,
(
V56RF-AHZZ01107544.1-trav:0.0163229
,
V62RF-JYKQ01054942.1-trav:0.0163229
):0.00280443
):0.0216825
):0.0207095
):0.0168773
):0.0730129
):0.0223219
):0.0242356
):0.307121
,
(
(
V81RF-AGCE01026522.1-trav:0.0448228
,
(
V184RF-JABR01098597.1-trav:0.0273261
,
(
V203RF-AQIB01128642.1-trav:0.0264995
,
(
V18RF-CABD02105602.1-trav:0.0103522
,
V73RF-AJFE01069977.1-trav:0.0103522
):0.0161473
):0.00082661
):0.0174967
):0.364444
,
(
V80RF-AGCE01026522.1-trav:0.0511754
,
(
V80RF-ADFV01192040.1-trav:0.03601
,
(
(
(
(
V17RF-CABD02105602.1-trav:-0
,
V72RF-AJFE01069977.1-trav:-0
):0.00535908
,
V82RF-AACZ03097619.1-trav:0.00535908
):0.0180186
,
(
V72RF-JYKQ01054957.1-trav:0.0191273
,
(
V36RF-AHZZ01098200.1-trav:0.00535908
,
(
V202RF-AQIB01128642.1-trav:-0
,
V141RF-AQIA01064151.1-trav:-0
):0.00535908
):0.0137682
):0.00425042
):0.0057252
,
(
V43RF-JABR01080842.1-trav:0.0219317
,
V183RF-JABR01098597.1-trav:0.0219317
):0.0071712
):0.00690714
):0.0151654
):0.358091
):0.0958219
):0.0322974
):1.44686
,
(
(
V142RF-ABGA01083939.1-trav:0.0191273
,
(
V66RF-ADFV01192037.1-trav:0.0163229
,
(
V70RF-AACZ03097613.1-trav:-0
,
V60RF-AJFE01069975.1-trav:-0
):0.0163229
):0.00280443
):0.668456
,
(
(
(
(
V96RF-ADFV01192050.1-trav:0.0262484
,
(
(
V61RF-AACZ03095319.1-trav:0.00535908
,
V115RF-AJFE01024276.1-trav:0.00535908
):0.0138114
,
(
V28RF-CABD02105628.1-trav:0.0107994
,
V218RF-ABGA01321068.1-trav:0.0107994
):0.00837116
):0.00707786
):0.0172484
,
(
V93RF-JABR01039937.1-trav:0.0319678
,
(
V193RF-AQIB01128636.1-trav:0.0191273
,
(
V4RF-AHZZ01035404.1-trav:0.00535908
,
(
V121RF-JYKQ01135389.1-trav:-0
,
V153RF-AQIA01064166.1-trav:-0
):0.00535908
):0.0137682
):0.0128405
):0.011529
):0.475219
,
(
(
(
V21RF-CABD02105612.1-trav:0.010684
,
V86RF-AACZ03097622.1-trav:0.010684
):0
,
V86RF-AJFE01010527.1-trav:0.010684
):0.420689
,
(
(
V102RF-ABDC01542818.1-trav:0.0452661
,
V34RF-JZKE01143869.1-trav:0.0452661
):0.0875881
,
(
(
V204RF-AHZZ01093946.1-trav:0.0217366
,
(
V162RF-JYKQ01026643.1-trav:0.010684
,
V150RF-AQIA01064166.1-trav:0.010684
):0.0110526
):0.039052
,
(
V175RF-JABR01098593.1-trav:0.0485804
,
(
V221RF-ABGA01321081.1-trav:0.0404644
,
(
V93RF-ADFV01192045.1-trav:0.0361695
,
(
(
V58RF-AACZ03095314.1-trav:-0
,
V113RF-AJFE01024276.1-trav:-0
):0.00535908
,
V200RF-AACZ03171149.1-trav:0.00535908
):0.0308105
):0.00429489
):0.00811599
):0.0122082
):0.0720655
):0.298519
):0.087343
):0.0271935
,
(
(
V144RF-ABGA01113129.1-trav:0.0247799
,
(
V62RF-ADFV01192035.1-trav:0.0163229
,
(
(
V66RF-AACZ03097613.1-trav:-0
,
V166RF-AACZ03171395.1-trav:-0
):0
,
V55RF-AJFE01069975.1-trav:-0
):0.0163229
):0.00845706
):0.527184
,
(
(
V65RF-ADFV01192037.1-trav:0.0360427
,
(
V210RF-AQIB01128644.1-trav:0.0270945
,
(
(
(
V82RF-AHZZ01198214.1-trav:-0
,
V126RF-AQIA01064138.1-trav:-0
):0.010571
,
V58RF-JYKQ01054940.1-trav:0.010571
):0.00540413
,
V203RF-JABR01098604.1-trav:0.0159752
):0.0111193
):0.00894823
):0.403332
,
(
V201RF-JABR01098604.1-trav:0.046808
,
(
V63RF-ADFV01192035.1-trav:0.0247799
,
(
V67RF-AACZ03097613.1-trav:0.00535908
,
V56RF-AJFE01069975.1-trav:0.00535908
):0.0194208
):0.0220281
):0.392566
):0.112589
):-0.00605392
):0.141674
):1.44686
):0.406306
):0.0680906
):0.460159
):1.72175
,
(
(
(
(
(
V118RF-JYKQ01131111.1-trbv:0.0276086
,
(
V78RF-JABR01196792.1-trbv:0.0235659
,
(
V126RF-AHZZ01067647.1-trbv:0.0154805
,
(
V191RF-AQIB01162321.1-trbv:-0
,
V118RF-AQIA01048536.1-trbv:-0
):0.0154805
):0.0080854
):0.0040427
):0.0196566
,
(
V31RF-ADFV01062085.1-trbv:0.0303044
,
(
V46RF-ABGA01091263.1-trbv:0.0234864
,
(
V51RF-AACZ03053995.1-trbv:0.00508649
,
V126RF-AJFE01070459.1-trbv:0.00508649
):0.0183999
):0.006818
):0.0169608
):1.16559
,
(
(
(
V138RF-ABDC01560090.1-trbv:0.148736
,
(
V26RF-AGCE01062012.1-trbv:0.105078
,
(
(
V107RF-CABD02377004.1-trbv:0.0103522
,
(
V52RF-AACZ03066999.1-trbv:-0
,
V77RF-AJFE01104359.1-trbv:-0
):0.0103522
):0.0550761
,
(
(
V64RF-JABR01092448.1-trbv:0.027841
,
(
(
(
V138RF-AHZZ01067649.1-trbv:0.0103522
,
V185RF-AQIB01162321.1-trbv:0.0103522
):0.00528981
,
V112RF-JYKQ01131104.1-trbv:0.015642
):0.00536809
,
V112RF-AQIA01048536.1-trbv:0.0210101
):0.00683094
):0.0174082
,
(
V26RF-ADFV01062081.1-trbv:0.0292236
,
(
V101RF-CABD02352526.1-trbv:0.015642
,
(
V45RF-AACZ03053992.1-trbv:0.0103522
,
V129RF-AJFE01070460.1-trbv:0.0103522
):0.00528981
):0.0135817
):0.0160255
):0.0201791
):0.0396493
):0.0436587
):0.208899
,
(
V108RF-JZKE01294668.1-trbv:0.309726
,
(
V132RF-ABDC01473376.1-trbv:0.24707
,
(
V132RF-ABGA01047585.1-trbv:0.0682667
,
(
(
V65RF-JABR01092448.1-trbv:0.0224328
,
(
V186RF-AQIB01162321.1-trbv:0.0154649
,
(
(
V139RF-AHZZ01067649.1-trbv:0.0101422
,
V113RF-JYKQ01131105.1-trbv:0.0101422
):0.000209991
,
V113RF-AQIA01048536.1-trbv:0.0103522
):0.00511276
):0.00696788
):0.0318906
,
(
V43RF-ABGA01091257.1-trbv:0.0223721
,
(
V102RF-CABD02352526.1-trbv:0.0129971
,
(
V46RF-AACZ03053992.1-trbv:0.00513877
,
V130RF-AJFE01070460.1-trbv:0.00513877
):0.0078583
):0.00937507
):0.0319512
):0.0139433
):0.178803
):0.0626562
):0.0479094
):0.344049
,
(
(
V41RF-AACZ03053991.1-trbv:0.0281605
,
(
V24RF-ADFV01062079.1-trbv:0.0239873
,
(
V98RF-CABD02352520.1-trbv:0.0158068
,
V38RF-ABGA01091249.1-trbv:0.0158068
):0.00818047
):0.00417323
):0.61788
,
(
(
V109RF-ABDC01281089.1-trbv:0.175289
,
(
(
V112RF-ABDC01281096.1-trbv:0.0677794
,
V116RF-JZKE01294692.1-trbv:0.0677794
):0.0782925
,
(
(
(
V72RF-JABR01095741.1-trbv:0.0438246
,
(
V68RF-AQIA01048525.1-trbv:0.0380565
,
(
V236RF-AHZZ01107345.1-trbv:0.0212331
,
V24RF-JYKQ01029805.1-trbv:0.0212331
):0.0168233
):0.00576811
):0.0155302
,
(
(
V73RF-AQIA01048525.1-trbv:0.0171634
,
(
(
V145RF-AQIB01162312.1-trbv:-0
,
V28RF-JYKQ01029807.1-trbv:-0
):0.0131336
,
(
V172RF-AHZZ01067656.1-trbv:0.00519213
,
V148RF-AQIB01162312.1-trbv:0.00519213
):0.0079415
):0.00402976
):0.0382228
,
(
V213RF-ABGA01277831.1-trbv:0.0412805
,
(
V5RF-ADFV01062069.1-trbv:0.0261173
,
(
V207RF-ABGA01277827.1-trbv:0.0215761
,
(
V1RF-ADFV01062069.1-trbv:0.0229894
,
(
V5RF-AACZ03053974.1-trbv:0.0153116
,
(
V66RF-CABD02352480.1-trbv:0.0104605
,
V33RF-AJFE01039607.1-trbv:0.0104605
):0.00485115
):0.00767784
):-0.00141335
):0.00454123
):0.0151632
):0.0141057
):0.00396857
):0.0841486
,
(
V2RF-AGCE01061995.1-trbv:0.106398
,
(
(
(
V166RF-AHZZ01067655.1-trbv:0.0104605
,
V32RF-JYKQ01029809.1-trbv:0.0104605
):0.0219595
,
(
V152RF-AQIB01162312.1-trbv:0.0104605
,
V77RF-AQIA01048526.1-trbv:0.0104605
):0.0219595
):0.0409497
,
(
(
V10RF-ADFV01062071.1-trbv:0.0253837
,
V203RF-ABGA01277811.1-trbv:0.0253837
):0.0155215
,
(
(
V8RF-AACZ03053975.1-trbv:-0
,
V36RF-AJFE01039609.1-trbv:-0
):0.0288587
,
(
V71RF-CABD02352492.1-trbv:0.00519213
,
(
V11RF-AACZ03053977.1-trbv:-0
,
V159RF-AJFE01070464.1-trbv:-0
):0.00519213
):0.0236666
):0.0120464
):0.0324646
):0.0330288
):0.0371049
):0.00256854
):0.0292172
):0.1954
,
(
(
(
V144RF-AQIB01162311.1-trbv:0.057315
,
(
(
V238RF-AHZZ01107346.1-trbv:0.0306801
,
V71RF-JABR01095741.1-trbv:0.0306801
):0.00366608
,
(
V23RF-JYKQ01029805.1-trbv:0.0104605
,
V67RF-AQIA01048525.1-trbv:0.0104605
):0.0238857
):0.0229688
):0.0215297
,
(
(
V4RF-ADFV01062069.1-trbv:0.0791203
,
(
V166RF-JABR01088216.1-trbv:0.0598852
,
(
V31RF-JYKQ01029809.1-trbv:0.0348076
,
(
V151RF-AQIB01162312.1-trbv:0.0281083
,
(
V165RF-AHZZ01067655.1-trbv:0.0150156
,
V76RF-AQIA01048526.1-trbv:0.0150156
):0.0130927
):0.00669932
):0.0250776
):0.0192351
):-0.0119606
,
(
(
V147RF-AQIB01162312.1-trbv:0.0296227
,
(
V171RF-AHZZ01067656.1-trbv:0.0158068
,
V72RF-AQIA01048525.1-trbv:0.0158068
):0.0138159
):0.0321174
,
(
V9RF-ADFV01062071.1-trbv:0.0431156
,
(
(
(
V70RF-CABD02352491.1-trbv:-0
,
V10RF-AACZ03053977.1-trbv:-0
):0
,
V158RF-AJFE01070464.1-trbv:-0
):0.0380565
,
(
V1RF-AGCE01061995.1-trbv:0.0323337
,
V198RF-ABGA01277809.1-trbv:0.0323337
):0.00572273
):0.00505918
):0.0186245
):0.00541951
):0.0116851
):0.0619604
,
(
(
(
V99RF-ABDC01527872.1-trbv:0.0323337
,
V114RF-ABDC01281097.1-trbv:0.0323337
):0.02491
,
(
V64RF-ABDC01399103.1-trbv:0.0380123
,
V111RF-ABDC01281094.1-trbv:0.0380123
):0.0192315
):0.0304649
,
(
V115RF-JZKE01294690.1-trbv:0.0740255
,
V117RF-JZKE01294699.1-trbv:0.0740255
):0.0136831
):0.0530965
):0.229884
):0.275352
):0.0556442
):0.511169
):1.95793
,
(
(
(
(
(
V132RF-AJFE01070461.1-trbv:0.0156811
,
(
V97RF-CABD02352520.1-trbv:0.0103522
,
V40RF-AACZ03053991.1-trbv:0.0103522
):0.00532895
):0.0643304
,
(
V21RF-AGCE01062009.1-trbv:0.0639862
,
(
V134RF-AHZZ01067649.1-trbv:0.015642
,
V107RF-JYKQ01131102.1-trbv:0.015642
):0.0483443
):0.0160253
):0.30832
,
(
(
(
V37RF-AACZ03053989.1-trbv:-0
,
V134RF-AJFE01070462.1-trbv:-0
):0.100704
,
(
(
V19RF-AACZ03053981.1-trbv:0.00513877
,
V139RF-AJFE01070463.1-trbv:0.00513877
):0.0775109
,
(
V21RF-AACZ03053983.1-trbv:0.0210101
,
V81RF-ABGA01276890.1-trbv:0.0210101
):0.0616396
):0.0180542
):0.176047
,
(
V110RF-JZKE01294669.1-trbv:0.215687
,
(
V29RF-AACZ03053988.1-trbv:0.16787
,
(
(
V102RF-JYKQ01131101.1-trbv:0.0129971
,
(
V128RF-AHZZ01067649.1-trbv:0.00513877
,
V102RF-AQIA01048532.1-trbv:0.00513877
):0.0078583
):0.0995317
,
(
V17RF-AGCE01062008.1-trbv:0.085081
,
(
V18RF-ADFV01062075.1-trbv:0.0543479
,
(
V189RF-ABGA01259417.1-trbv:0.0390945
,
(
(
V90RF-CABD02352511.1-trbv:-0
,
V91RF-CABD02352512.1-trbv:-0
):0.0237342
,
(
V34RF-AACZ03053988.1-trbv:0.00513877
,
V156RF-AJFE01070463.1-trbv:0.00513877
):0.0185954
):0.0153603
):0.0152534
):0.0307331
):0.0274477
):0.0553409
):0.0478174
):0.0610639
):0.111581
):0.0858791
,
(
(
(
V25RF-ADFV01062079.1-trbv:0.0319889
,
(
(
V42RF-AACZ03053991.1-trbv:-0
,
V133RF-AJFE01070461.1-trbv:-0
):0.015642
,
V39RF-ABGA01091249.1-trbv:0.015642
):0.0163469
):0.0138998
,
(
V62RF-JABR01092448.1-trbv:0.0448197
,
(
V183RF-AQIB01162320.1-trbv:0.018326
,
(
V136RF-AHZZ01067649.1-trbv:0.00513877
,
V109RF-JYKQ01131102.1-trbv:0.00513877
):0.0131872
):0.0264937
):0.00106899
):0.351025
,
(
V24RF-AGCE01062011.1-trbv:0.077694
,
(
V63RF-JABR01092448.1-trbv:0.0443103
,
(
V99RF-CABD02352525.1-trbv:0.0104605
,
(
V43RF-AACZ03053991.1-trbv:-0
,
V127RF-AJFE01070460.1-trbv:-0
):0.0104605
):0.0338498
):0.0333838
):0.31922
):0.0772969
):1.32945
,
(
(
(
(
V112RF-JZKE01294669.1-trbv:0.118594
,
(
V18RF-AGCE01062008.1-trbv:0.0587334
,
(
V19RF-ADFV01062075.1-trbv:0.0323768
,
(
V92RF-CABD02352512.1-trbv:0.0104605
,
(
V35RF-AACZ03053988.1-trbv:-0
,
V157RF-AJFE01070463.1-trbv:-0
):0.0104605
):0.0219164
):0.0263566
):0.0598605
):0.15558
,
(
(
(
V13RF-ADFV01062075.1-trbv:0.0288215
,
(
V17RF-AACZ03053981.1-trbv:0.01852
,
(
V77RF-CABD02352499.1-trbv:0.0158068
,
V194RF-ABGA01277802.1-trbv:0.0158068
):0.00271316
):0.0103015
):0.0111671
,
(
V82RF-AQIA01048528.1-trbv:0.026889
,
(
V37RF-JYKQ01029811.1-trbv:0.015977
,
(
V161RF-AHZZ01067653.1-trbv:0.010684
,
(
V154RF-JABR01088215.1-trbv:0.00519213
,
V157RF-AQIB01162313.1-trbv:0.00519213
):0.00549184
):0.005293
):0.010912
):0.0130995
):0.222361
,
(
(
V3RF-AGCE01061995.1-trbv:0.121537
,
(
(
V29RF-JYKQ01029807.1-trbv:0.0359514
,
(
V149RF-AQIB01162312.1-trbv:0.0273261
,
V74RF-AQIA01048525.1-trbv:0.0273261
):0.00862527
):0.0119729
,
(
V205RF-ABGA01277825.1-trbv:0.0423601
,
(
V6RF-ADFV01062069.1-trbv:0.0295376
,
(
V67RF-CABD02352480.1-trbv:0.0158068
,
(
V6RF-AACZ03053974.1-trbv:-0
,
V34RF-AJFE01039607.1-trbv:-0
):0.0158068
):0.0137308
):0.0128226
):0.00556408
):0.0736132
):0.0536737
,
(
(
V16RF-AACZ03053981.1-trbv:0.0824332
,
(
(
V193RF-ABGA01277802.1-trbv:0.0104605
,
V195RF-ABGA01277803.1-trbv:0.0104605
):0.0520484
,
(
V153RF-JABR01088215.1-trbv:0.0617574
,
(
(
V160RF-AHZZ01067653.1-trbv:0.00519213
,
V81RF-AQIA01048528.1-trbv:0.00519213
):0.0160615
,
(
V156RF-AQIB01162313.1-trbv:0.00519213
,
V36RF-JYKQ01029811.1-trbv:0.00519213
):0.0160615
):0.0405038
):0.000751387
):0.0199244
):0.0664477
,
(
(
(
V89RF-AQIA01048530.1-trbv:0.0403554
,
(
V86RF-JYKQ01131090.1-trbv:0.0301862
,
(
V152RF-AHZZ01067652.1-trbv:0.0273261
,
V163RF-AQIB01162317.1-trbv:0.0273261
):0.00286007
):0.0101692
):0.0379747
,
(
V16RF-ADFV01062075.1-trbv:0.0568527
,
(
V33RF-AACZ03053988.1-trbv:-0
,
V155RF-AJFE01070463.1-trbv:-0
):0.0568527
):0.0214773
):0.0413129
,
(
(
V15RF-AGCE01062004.1-trbv:-0
,
V16RF-AGCE01062006.1-trbv:-0
):0.139771
,
(
(
V17RF-ADFV01062075.1-trbv:0.0482418
,
(
V24RF-AACZ03053983.1-trbv:0.01852
,
(
V82RF-CABD02352503.1-trbv:0.00519213
,
V144RF-AJFE01070463.1-trbv:0.00519213
):0.0133278
):0.0297218
):0.0461373
,
(
(
(
V142RF-AHZZ01067651.1-trbv:0.010684
,
V94RF-AQIA01048530.1-trbv:0.010684
):0.0566584
,
(
V93RF-JYKQ01131093.1-trbv:0.0409853
,
(
V166RF-AQIB01162319.1-trbv:0.0212331
,
V168RF-AQIB01162319.1-trbv:0.0212331
):0.0197522
):0.026357
):0.0258682
,
(
V143RF-JABR01088213.1-trbv:0.0803467
,
(
V175RF-AQIB01162320.1-trbv:0.0865578
,
(
(
(
V155RF-AHZZ01067652.1-trbv:-0
,
V89RF-JYKQ01131091.1-trbv:-0
):0
,
V90RF-JYKQ01131092.1-trbv:-0
):0.0821826
,
(
(
V86RF-CABD02352509.1-trbv:0.0323337
,
V149RF-AJFE01070463.1-trbv:0.0323337
):0.0439537
,
(
V149RF-AHZZ01067651.1-trbv:0.0881607
,
(
(
V151RF-JABR01088214.1-trbv:0.0624229
,
(
V89RF-CABD02352511.1-trbv:0.0415531
,
(
V22RF-ADFV01062076.1-trbv:0.0364863
,
(
V83RF-CABD02352508.1-trbv:0.0233192
,
(
V26RF-AACZ03053984.1-trbv:0.0151485
,
(
V97RF-ABGA01301086.1-trbv:0.0118166
,
(
V152RF-AJFE01070463.1-trbv:0.00782629
,
(
V30RF-AACZ03053988.1-trbv:0.00519213
,
V146RF-AJFE01070463.1-trbv:0.00519213
):0.00263416
):0.00399026
):0.00333196
):0.00817072
):0.0131671
):0.00506673
):0.0208698
):0.00017976
,
(
V149RF-JABR01088214.1-trbv:0.0583613
,
(
V97RF-AQIA01048531.1-trbv:0.0310014
,
(
(
V146RF-AHZZ01067651.1-trbv:0.00519213
,
V98RF-AQIA01048532.1-trbv:0.00519213
):0.0272505
,
(
(
V172RF-AQIB01162320.1-trbv:0.0104605
,
V98RF-JYKQ01131095.1-trbv:0.0104605
):0.0220457
,
(
V145RF-AHZZ01067651.1-trbv:0.0212331
,
V96RF-JYKQ01131094.1-trbv:0.0212331
):0.011273
):-6.3546e-05
):-0.00144118
):0.0273599
):0.00424131
):0.0255581
):-0.0118732
):0.00589514
):0.00437517
):-0.00621112
):0.0128638
):0.00116853
):0.0453915
):-0.0201277
):0.029238
):0.0263303
):0.0871381
):0.0118246
):0.270792
,
(
V10RF-AGCE01062000.1-trbv:0.434878
,
(
V113RF-ABDC01281097.1-trbv:0.15043
,
(
V69RF-AQIA01048525.1-trbv:0.0679433
,
(
(
V0RF-ADFV01062069.1-trbv:0.037647
,
(
V4RF-AACZ03053974.1-trbv:0.0103522
,
V32RF-AJFE01039607.1-trbv:0.0103522
):0.0272948
):0.0160098
,
(
V73RF-JABR01095742.1-trbv:0.0376037
,
V27RF-JYKQ01029807.1-trbv:0.0376037
):0.016053
):0.0142866
):0.082487
):0.284447
):0.110088
):1.15188
,
(
(
V12RF-AGCE01062000.1-trbv:0.199265
,
(
V119RF-ABDC01368596.1-trbv:0.181866
,
(
(
V180RF-AQIB01162320.1-trbv:0.0610223
,
(
(
(
(
V133RF-AHZZ01067649.1-trbv:-0
,
V107RF-AQIA01048532.1-trbv:-0
):0.0103522
,
V59RF-JABR01092448.1-trbv:0.0103522
):0
,
V106RF-JYKQ01131102.1-trbv:0.0103522
):0.0329529
,
(
V39RF-AACZ03053991.1-trbv:-0
,
V131RF-AJFE01070461.1-trbv:-0
):0.0433051
):0.0177172
):0.0891431
,
(
V20RF-AGCE01062009.1-trbv:0.0884406
,
(
(
V34RF-ABGA01091248.1-trbv:0.015642
,
V35RF-ABGA01091248.1-trbv:0.015642
):0.0318471
,
(
(
(
V38RF-AACZ03053989.1-trbv:-0
,
V135RF-AJFE01070462.1-trbv:-0
):0.00774547
,
(
V95RF-CABD02352514.1-trbv:0.00513877
,
V96RF-CABD02352515.1-trbv:0.00513877
):0.0026067
):0.0475924
,
(
V105RF-JYKQ01131102.1-trbv:0.0350148
,
(
V132RF-AHZZ01067649.1-trbv:0.0334217
,
(
V179RF-AQIB01162320.1-trbv:0.0282649
,
(
V106RF-AQIA01048532.1-trbv:0.0197287
,
(
V178RF-AQIB01162320.1-trbv:0.018326
,
(
V131RF-AHZZ01067649.1-trbv:0.0210502
,
(
V58RF-JABR01092448.1-trbv:0.0103522
,
V105RF-AQIA01048532.1-trbv:0.0103522
):0.010698
):-0.00272415
):0.00140269
):0.00853622
):0.00515673
):0.00159317
):0.0203231
):-0.00784887
):0.0409515
):0.0617248
):0.0317007
):0.0173988
):0.164696
,
(
V118RF-JZKE01294700.1-trbv:0.372488
,
(
(
V21RF-ADFV01062075.1-trbv:-0
,
V94RF-CABD02352514.1-trbv:-0
):0.279839
,
(
(
(
(
(
V81RF-CABD02352502.1-trbv:-0
,
V23RF-AACZ03053983.1-trbv:-0
):0
,
V143RF-AJFE01070463.1-trbv:-0
):0.0490951
,
V63RF-ABGA01129113.1-trbv:0.0490951
):0.0658912
,
(
(
(
V93RF-ABGA01301078.1-trbv:0.0659684
,
(
V169RF-AQIB01162319.1-trbv:0.0632875
,
(
V148RF-JABR01088214.1-trbv:0.0595533
,
(
(
V95RF-JYKQ01131094.1-trbv:0.015642
,
V96RF-AQIA01048531.1-trbv:0.015642
):0.0306253
,
(
(
V151RF-AHZZ01067652.1-trbv:0.0210101
,
V85RF-JYKQ01131090.1-trbv:0.0210101
):0
,
V88RF-AQIA01048530.1-trbv:0.0210101
):0.0252572
):0.0132861
):0.00373415
):0.00268094
):0.0229638
,
(
V15RF-ADFV01062075.1-trbv:0.0732665
,
(
V164RF-AQIB01162317.1-trbv:0.0264995
,
(
V154RF-AHZZ01067652.1-trbv:0.0210101
,
V88RF-JYKQ01131090.1-trbv:0.0210101
):0.00548942
):0.046767
):0.0156657
):0.00167898
,
(
(
V99RF-ABGA01301086.1-trbv:0.0404544
,
(
V32RF-AACZ03053988.1-trbv:0.00513877
,
V154RF-AJFE01070463.1-trbv:0.00513877
):0.0353156
):0.0629597
,
(
(
V0RF-JABR01013263.1-trbv:0.0602755
,
(
V174RF-AQIB01162320.1-trbv:0.0224328
,
(
V100RF-AQIA01048532.1-trbv:0.0129971
,
(
V148RF-AHZZ01067651.1-trbv:0.0103522
,
V100RF-JYKQ01131098.1-trbv:0.0103522
):0.0026449
):0.00943574
):0.0378427
):0.00706619
,
(
(
(
V88RF-CABD02352511.1-trbv:0.00513877
,
V151RF-AJFE01070463.1-trbv:0.00513877
):0.0185954
,
(
V27RF-AACZ03053986.1-trbv:0.0103522
,
V148RF-AJFE01070463.1-trbv:0.0103522
):0.0133821
):0.0456935
,
(
V163RF-JABR01088215.1-trbv:0.0609989
,
(
(
V141RF-AHZZ01067651.1-trbv:0.0210101
,
V93RF-AQIA01048530.1-trbv:0.0210101
):0.0281761
,
(
V157RF-AHZZ01067652.1-trbv:0.0264584
,
V92RF-AQIA01048530.1-trbv:0.0264584
):0.0227278
):0.0118127
):0.00842881
):-0.00208607
):0.0360724
):-0.0128029
):0.0243751
):0.0576988
,
(
V113RF-JZKE01294672.1-trbv:0.159401
,
(
(
(
(
(
V169RF-AHZZ01067655.1-trbv:-0
,
V34RF-JYKQ01029809.1-trbv:-0
):0
,
V79RF-AQIA01048527.1-trbv:-0
):0.0319889
,
V154RF-AQIB01162312.1-trbv:0.0319889
):0.0557741
,
(
V197RF-ABGA01277808.1-trbv:0.0523127
,
(
V73RF-CABD02352494.1-trbv:0.0376037
,
V13RF-AACZ03053979.1-trbv:0.0376037
):0.0147089
):0.0354503
):0.026849
,
(
(
V75RF-CABD02352499.1-trbv:0.0129971
,
(
V15RF-AACZ03053981.1-trbv:0.00513877
,
V136RF-AJFE01070463.1-trbv:0.00513877
):0.0078583
):0.0830382
,
(
V207RF-JABR01184607.1-trbv:0.0545469
,
(
V155RF-AQIB01162313.1-trbv:0.0323989
,
(
V35RF-JYKQ01029811.1-trbv:0.0320311
,
(
V159RF-AHZZ01067653.1-trbv:0.0264584
,
V80RF-AQIA01048527.1-trbv:0.0264584
):0.00557268
):0.000367891
):0.0221479
):0.0414884
):0.0185767
):0.0447889
):0.0132842
):0.107154
):0.0926491
):-0.00852716
):1.15188
):0.177572
):0.628479
):1.71062
,
(
(
(
V224RF-ABGA01349559.1-trbv:0.0330913
,
(
V109RF-CABD02377005.1-trbv:0.0161471
,
(
V54RF-AACZ03067000.1-trbv:-0
,
V79RF-AJFE01104359.1-trbv:-0
):0.0161471
):0.0169442
):0.0929198
,
(
(
V45RF-ABGA01091260.1-trbv:0.0144702
,
(
V48RF-AACZ03053992.1-trbv:0.00782629
,
(
V28RF-ADFV01062082.1-trbv:0.00519213
,
V123RF-AJFE01070459.1-trbv:0.00519213
):0.00263416
):0.00664393
):0.0363834
,
(
V115RF-AQIA01048536.1-trbv:0.023309
,
(
V115RF-JYKQ01131107.1-trbv:0.0226307
,
(
V188RF-AQIB01162321.1-trbv:0.00782629
,
(
V127RF-AHZZ01067648.1-trbv:0.00519213
,
V67RF-JABR01092448.1-trbv:0.00519213
):0.00263416
):0.0148044
):0.00067829
):0.0275446
):0.0751575
):2.81738
,
(
(
(
(
V41RF-ABGA01091252.1-trbv:0.0131336
,
(
(
V100RF-CABD02352526.1-trbv:-0
,
V128RF-AJFE01070460.1-trbv:-0
):0.00519213
,
V44RF-AACZ03053991.1-trbv:0.00519213
):0.0079415
):0.02347
,
(
(
V137RF-AHZZ01067649.1-trbv:0.0212331
,
V111RF-AQIA01048536.1-trbv:0.0212331
):0.00550829
,
(
V184RF-AQIB01162321.1-trbv:0.0212331
,
V111RF-JYKQ01131104.1-trbv:0.0212331
):0.00550829
):0.00986226
):0.347494
,
(
V104RF-JZKE01294660.1-trbv:0.389348
,
(
V36RF-AACZ03053988.1-trbv:0.277584
,
(
(
V196RF-ABGA01277806.1-trbv:0.0323768
,
(
V74RF-CABD02352498.1-trbv:0.0104605
,
(
V14RF-AACZ03053981.1-trbv:-0
,
V161RF-AJFE01070464.1-trbv:-0
):0.0104605
):0.0219164
):0.184076
,
(
(
(
V165RF-JABR01088216.1-trbv:0.0452436
,
(
V150RF-AQIB01162312.1-trbv:0.0239873
,
(
(
V173RF-AHZZ01067656.1-trbv:0.0104605
,
V30RF-JYKQ01029809.1-trbv:0.0104605
):0.00534636
,
V75RF-AQIA01048526.1-trbv:0.0158068
):0.00818047
):0.0212563
):0.0588326
,
(
(
(
V168RF-AHZZ01067655.1-trbv:-0
,
V33RF-JYKQ01029809.1-trbv:-0
):0.0380123
,
V78RF-AQIA01048526.1-trbv:0.0380123
):0.048748
,
(
(
V200RF-ABGA01277809.1-trbv:0.0359514
,
(
V69RF-CABD02352488.1-trbv:0.0158068
,
(
V12RF-AACZ03053977.1-trbv:-0
,
V160RF-AJFE01070464.1-trbv:-0
):0.0158068
):0.0201446
):0.0357589
,
(
(
V72RF-CABD02352493.1-trbv:0.035173
,
(
V9RF-AACZ03053976.1-trbv:0.00519213
,
V162RF-AJFE01070465.1-trbv:0.00519213
):0.0299809
):0.035901
,
(
V202RF-ABGA01277810.1-trbv:0.0779694
,
(
V204RF-ABGA01277815.1-trbv:0.0646515
,
(
V201RF-ABGA01277810.1-trbv:0.0620705
,
(
V8RF-ADFV01062071.1-trbv:0.0668779
,
(
V169RF-JABR01088216.1-trbv:0.0635893
,
(
V11RF-ADFV01062071.1-trbv:0.0604128
,
(
V68RF-CABD02352482.1-trbv:0.0325062
,
(
V7RF-ADFV01062069.1-trbv:0.0212331
,
(
V7RF-AACZ03053974.1-trbv:-0
,
V35RF-AJFE01039608.1-trbv:-0
):0.0212331
):0.011273
):0.0279066
):0.00317653
):0.00328857
):-0.00480738
):0.00258102
):0.0133179
):-0.00689544
):0.00063625
):0.01505
):0.017316
):0.0190218
,
(
(
(
V0RF-AGCE01061995.1-trbv:0.0437792
,
V4RF-AGCE01061995.1-trbv:0.0437792
):0.0397758
,
(
(
V31RF-AACZ03053988.1-trbv:-0
,
V153RF-AJFE01070463.1-trbv:-0
):0.0639877
,
(
V161RF-AQIB01162317.1-trbv:0.0309998
,
(
V87RF-AQIA01048530.1-trbv:0.01852
,
(
V150RF-AHZZ01067652.1-trbv:0.00519213
,
V84RF-JYKQ01131090.1-trbv:0.00519213
):0.0133278
):0.0124798
):0.0329879
):0.0195673
):0.0200998
,
(
(
V96RF-ABGA01301083.1-trbv:0.0477583
,
(
V25RF-AACZ03053983.1-trbv:0.0158068
,
V145RF-AJFE01070463.1-trbv:0.0158068
):0.0319515
):0.0550962
,
(
(
V91RF-JYKQ01131092.1-trbv:0.0481725
,
(
V165RF-AQIB01162318.1-trbv:0.046708
,
(
V156RF-AHZZ01067652.1-trbv:0.0267414
,
V91RF-AQIA01048530.1-trbv:0.0267414
):0.0199666
):0.00146443
):0.0465321
,
(
(
V152RF-JABR01088214.1-trbv:0.0500916
,
(
V99RF-AQIA01048532.1-trbv:0.0345658
,
(
V173RF-AQIB01162320.1-trbv:0.0245099
,
(
V147RF-AHZZ01067651.1-trbv:0.0161471
,
V99RF-JYKQ01131096.1-trbv:0.0161471
):0.00836281
):0.0100559
):0.0155258
):0.038379
,
(
(
V150RF-JABR01088214.1-trbv:0.0212331
,
V97RF-JYKQ01131094.1-trbv:0.0212331
):0.0444072
,
(
(
V143RF-AHZZ01067651.1-trbv:-0
,
V94RF-JYKQ01131093.1-trbv:-0
):0.0670231
,
(
V95RF-AQIA01048530.1-trbv:0.0805557
,
(
(
V87RF-CABD02352510.1-trbv:0.0245967
,
(
V28RF-AACZ03053987.1-trbv:0.0159752
,
V150RF-AJFE01070463.1-trbv:0.0159752
):0.00862152
):0.0481195
,
(
V98RF-ABGA01301086.1-trbv:0.0556056
,
(
V158RF-ABGA01223433.1-trbv:0.0409068
,
(
V158RF-JABR01088215.1-trbv:0.0323978
,
(
V142RF-AJFE01070463.1-trbv:0.01852
,
(
V80RF-CABD02352501.1-trbv:0.0158068
,
V22RF-AACZ03053983.1-trbv:0.0158068
):0.00271316
):0.0138779
):0.00850894
):0.0146988
):0.0171106
):0.00783944
):-0.0135326
):-0.00138275
):0.0228302
):0.00623397
):0.00814989
):0.000800386
):0.0194431
):0.0933546
):0.0611311
):0.111764
):-0.0052501
):1.02963
,
(
V185RF-AACZ03054006.1-trbv:0.849707
,
(
(
(
(
(
V49RF-AACZ03053994.1-trbv:0.0212741
,
(
V29RF-ADFV01062084.1-trbv:0.0104605
,
V105RF-CABD02352531.1-trbv:0.0104605
):0.0108137
):-4.09801e-05
,
V159RF-ABGA01225869.1-trbv:0.0212331
):0.0168344
,
(
(
V124RF-AHZZ01067647.1-trbv:0.0212331
,
V116RF-JYKQ01131110.1-trbv:0.0212331
):0.0125631
,
(
V68RF-JABR01092448.1-trbv:0.0323768
,
(
V189RF-AQIB01162321.1-trbv:0.0212331
,
V116RF-AQIA01048536.1-trbv:0.0212331
):0.0111437
):0.00141936
):0.00427133
):0.273385
,
(
(
V2RF-ABDC01116809.1-trbv:0.0945053
,
V0RF-JZKE01005121.1-trbv:0.0945053
):0.074294
,
(
V29RF-AGCE01062014.1-trbv:0.109066
,
(
(
V69RF-JABR01092448.1-trbv:0.0266254
,
(
V190RF-AQIB01162321.1-trbv:0.0140273
,
(
V117RF-JYKQ01131110.1-trbv:0.00758872
,
(
V125RF-AHZZ01067647.1-trbv:0.00503527
,
V117RF-AQIA01048536.1-trbv:0.00503527
):0.00255345
):0.00643862
):0.0125981
):0.0254686
,
(
(
V77RF-ABGA01224584.1-trbv:0.00519213
,
V160RF-ABGA01225869.1-trbv:0.00519213
):0.0258296
,
(
V30RF-ADFV01062084.1-trbv:0.0240078
,
(
(
V106RF-CABD02352532.1-trbv:0.0104605
,
V50RF-AACZ03053994.1-trbv:0.0104605
):0
,
V125RF-AJFE01070459.1-trbv:0.0104605
):0.0135473
):0.00701396
):0.0210723
):0.0569718
):0.0597334
):0.142653
):0.0670823
,
(
V104RF-CABD02352529.1-trbv:0.367238
,
(
(
(
V44RF-ABGA01091257.1-trbv:0.01852
,
(
V103RF-CABD02352529.1-trbv:0.00519213
,
(
V47RF-AACZ03053992.1-trbv:-0
,
V122RF-AJFE01070459.1-trbv:-0
):0.00519213
):0.0133278
):0.0170393
,
(
V187RF-AQIB01162321.1-trbv:0.0316883
,
(
V140RF-AHZZ01067649.1-trbv:0.0253644
,
(
V66RF-JABR01092448.1-trbv:0.01852
,
(
V114RF-JYKQ01131107.1-trbv:0.00519213
,
V114RF-AQIA01048536.1-trbv:0.00519213
):0.0133278
):0.00684438
):0.00632395
):0.00387099
):0.29209
,
(
(
(
V74RF-JZKE01196378.1-trbv:0.0912649
,
V106RF-JZKE01294668.1-trbv:0.0912649
):0.0819413
,
(
V129RF-ABDC01455982.1-trbv:0.17651
,
(
(
V19RF-AGCE01062009.1-trbv:0.100578
,
(
(
(
(
V129RF-AHZZ01067649.1-trbv:0.0104605
,
V103RF-JYKQ01131101.1-trbv:0.0104605
):0
,
V103RF-AQIA01048532.1-trbv:0.0104605
):0.0094161
,
(
V145RF-JABR01088213.1-trbv:0.0158068
,
V176RF-AQIB01162320.1-trbv:0.0158068
):0.00406974
):0.02795
,
(
V32RF-ABGA01091248.1-trbv:0.0408957
,
(
V20RF-ADFV01062075.1-trbv:0.0323337
,
V93RF-CABD02352513.1-trbv:0.0323337
):0.00856198
):0.00693088
):0.0527511
):0.035386
,
(
(
(
V163RF-AHZZ01067653.1-trbv:0.0104605
,
V82RF-JYKQ01131090.1-trbv:0.0104605
):0.0699152
,
V14RF-ADFV01062075.1-trbv:0.0803756
):0.0267101
,
(
V9RF-AGCE01061998.1-trbv:0.0868327
,
V11RF-AGCE01062000.1-trbv:0.0868327
):0.020253
):0.028878
):0.040546
):-0.00330353
):0.121248
,
(
V120RF-ABDC01368601.1-trbv:0.22455
,
(
V13RF-AGCE01062002.1-trbv:0.169945
,
(
V167RF-AHZZ01067655.1-trbv:0.0496369
,
V153RF-AQIB01162312.1-trbv:0.0496369
):0.120308
):0.0546054
):0.0699033
):0.0331959
):0.0395887
):0.0112964
):0.471172
):1.02963
):1.78775
):0.851167
):0.434622
):0.953396
):0.587535
):0.758987
)
;
