# Supplementary material for: Iterative Variable Gene Discovery from Whole Genome Sequencing with a Bootstrapped Multiresolution Algorithm
Source: Comput Math Methods Med. 2019 Feb 11;2019:3780245. doi: 10.1155/2019/3780245 (PMC6388353; doi:10.1155/2019/3780245)
Supplement: Supplementary Materials — supp_materialsV2.pdf: this is an updated document, which includes new figures requested by the reviewer. sequences_alignments.zip: these are genome sequence files that are relevant for reproducing some of the results. [file 3780245.f1.zip › 3780245.f1/sequences_alignments/bstrp_iteration_2_r.fasta]

>V1RF-AHZZ01030316.1-trgv |(43861, 44177)|2.98553608204|(1.000,0.990,0.996)|1
-SQKSSNLEGRTKSVTRPTGSSAEITCDLPEVS------SFYIHWYLHQEGKAPQ---RL
LYYDSSN--SRVVLESGISPGKYDTYGSTRRRNLRLI------LR-NLIENDSGVYYCAN
WD-----
>V2RF-AHZZ01035404.1-trdv |(2190, 2491)|2.85494383314|(0.991,0.953,0.931)|1
-SGMAQTVTQSQPEMSVREAETMTLSCTYDTSE-----SNYYLFWYKQPPSRQMI---LI
IRQEAYK--Q-Q----NATENRFSVNFQKAAKSFSLK------IS-DSQLGDAAMYFCAF
M------
>V3RF-AHZZ01035404.1-trav |(11684, 11986)|2.99493200206|(1.000,0.996,0.999)|1
-SGMAQTVTQSQPEMSVQEAETVTLSCTYDTSD-----SDYYLFWYKQPPSRQMI---LI
IRQEAYK--Q-Q----NATENRFSVNFQKAAKSFSLK------IS-DSQLGDAAMYFCAY
RS-----
>V4RF-AHZZ01035404.1-trav |(35215, 35503)|2.99799600001|(0.999,0.999,1.000)|1
-LSGELKVGQNPLFLSTQEGKNYTIYCNYSTAS-------NRLYWYRQDPGKSLE---SL
FVLLSNG--A-VK-----QEGRLMASLDTKARLSSLH------IT-AALQDLSATYFCAV
-------
>V6RF-AHZZ01040804.1-igkv |(26742, 27054)|2.41208562797|(0.981,0.989,0.705)|1
-CNGDIVLTQSPASLAVSPGQRATITCRASESVSL-LG-INFIHWYQQKPGQPPK---LL
IYQ------A-SNKDTG-VPARFSGSG--SGTDFTLT------IN-PVEADDAANYYCLQ
SKDLP--
>V7RF-AHZZ01040804.1-igkv |(44403, 44694)|2.99494800078|(1.000,0.998,0.997)|1
-----IVLTQSPTSMAVSQGERVTISCTASSSV-----STSYLHWYQQKPGFPPR---LL
VYR------T-SSLASG-VPARFSGSG--SGTSYTLT------IS-SMEAEDAANYYCQQ
GNSIP--
>V8RF-AHZZ01042100.1-igkv |(22346, 22662)|2.39426919901|(0.945,0.696,0.977)|1
-TSGDILLTQTPLSLPVTPAEPASISCRSSQSLLHS-NGNTYLHWYLQKPGQSPQ---LL
IYE------V-SNRASG-VPERFSGSG--SGTDFTLK------IS-LVEAEDVGVYYCMQ
TTQWP--
>V9RF-AHZZ01042101.1-igkv |(1294, 1609)|2.63259108277|(0.943,0.852,0.884)|1
-SSGDIVMTQTPLSLPVTLGEPTSISCRSSQSLVYS-DGKTYLHWYLQKPGQSLQ---LL
MYL------V-SKRASG-VPDRFSGSG--SGTDFTLK------IS-RVEAEDVGVYYCMQ
TLRSP--
>V10RF-AHZZ01042101.1-igkv |(23302, 23620)|2.23644166627|(0.984,0.650,0.964)|1
-SSGDIVMTQTPLFLPVTLGEPASISCRSSQSLLDSEDGNTYLDWYLQKPGQSPQ---LL
IYE------V-SNRASG-VPDRFSGSG--SDTDFTLK------IS-RVEAEDVGVYYCMQ
ALEFP--
>V11RF-AHZZ01064615.1-ighv |(3396, 3696)|2.98796400065|(0.997,0.997,0.994)|1
-VQCEVQLVES-GGGLVQPGGSLRLSCAASGFTF--S--SYAMQWVHQTPGKGLE---WV
SAIGP--G-G-DTYYADAVKGRFTISRDNAKNSLYLQ------MN-SL--RAEAVYYCAR
-------
>V12RF-AHZZ01064617.1-ighv |(710, 1019)|2.63305438058|(0.850,0.870,0.988)|1
-AHSQEQLVQS-GAEVKKPGASVKVSCKASEYTF--T--SYVISWLRQAPGQGFE---WM
GGINPSD--G-STSYAQKFQDRVTITADMSTSTVYME------LS-SLRSEDTAVYYCAR
-------
>V13RF-AHZZ01064625.1-ighv |(10295, 10604)|2.92658443703|(0.990,0.950,0.993)|1
-VLSQVQLQES-GPAVVKPSQTLSLTCAVSGGSI--SSG-YDWSWIRQSPGKALE---WI
GYISY-S--G-STNYNPSLKSRVTISRDTSKNQFSLK------LS-SVTAADTAVYYCAR
-------
>V14RF-AHZZ01064628.1-ighv |(242, 554)|2.7290952916|(0.954,0.839,0.994)|1
-VLSQVKLQQW-GEGLVKLSETLSLTCAVYGGSI--S-GYYYWSWIRQAPGKGLE---WI
GSIYSSG--S-STYYNPSLKSRVTISTDTSKNQFSLK------LS-SVTAADSAVYYCAR
-------
>V15RF-AHZZ01064636.1-ighv |(1268, 1580)|2.67674188868|(0.869,0.906,0.916)|1
-VLSQVKLQQW-GEGLVKPSETLSLTCAVYGGSI--S-GYYYWSWIRQPPGKGLE---WI
GNIDGNS--A-STNYNPSLKNRVTISKDTSKNQFSLK------LS-SVTAADSAVYYCAR
-------
>V16RF-AHZZ01069449.1-ighv |(25634, 25949)|3.0|(1.000,1.000,1.000)|1
-VQCEVQLVES-GGGLVQPGGSLRLSCAASGFTF--S--NYWMNWVRQAPGKGLE---WV
GFIKNKADGG-TAAYAESVKGRFTISRDDSKNTLYLQ------MN-SLKTEDTAVYYCTR
-------
>V17RF-AHZZ01069451.1-ighv |(7153, 7468)|2.99799200002|(1.000,0.999,0.999)|1
-VQCEVQLVES-GGGLVQPGRSLRLSCAASGFTF--S--NYYMHWVRQAQGKGLE---WV
GLIRNKANSY-TTEYAAAVKGRFTISRDDSKNTLYLQ------MS-SLKTEDTAVYYCTT
-------
>V18RF-AHZZ01069453.1-ighv |(22421, 22735)|2.32647796434|(0.963,0.703,0.909)|1
-VFSQVTLKES-GPALVKPTQTLTLTCTFSGFSL--STSGMRVSWIRQPPGKALE---WL
ARIDWD---D-DKYYSTSLKSRLTISKDTSKNQVVLT------MT-NMDPVDTATYYCAR
R------
>V19RF-AHZZ01069455.1-ighv |(6977, 7286)|2.97360004313|(0.992,0.984,0.998)|1
-VQCEVQLVES-GGGLVQPGGSLRLSCAASGFTF--S--SYYMYWIRQAPGKGLQ---WV
SAINTGG--G-STWYTDSVKGRFTISRENAKNTLYLQ------MN-SLRAEDTAVYYCAK
-------
>V20RF-AHZZ01069455.1-ighv |(20090, 20405)|2.49395048153|(0.978,0.733,0.998)|1
-VQCEMQLVES-GGGLAQPGGSLRLSCAASGFTF--S--DHYMHWVRQAPGKGPE---WV
GFIRNKAKGG-TAEYAASVKGRFTISRDDSKNVTYLQ------MN-SLKTEDTAVYYCAR
-------
>V21RF-AHZZ01069455.1-ighv |(33477, 33791)|2.26423290389|(0.970,0.747,0.817)|1
-VLSQVTLKES-GPALVKPTQTLTLTCTFSGFSL--STSGMCVSWIRQPPGKALE---WL
ARIDWD---N-DKYYSTSLKSRLTISKDTSKNQVVLT------MT-NMDPVDTATYYCAR
V------
>V23RF-AHZZ01069456.1-ighv |(9988, 10297)|3.0|(1.000,1.000,1.000)|1
-VQCEVQLVES-GGGLVQPGGSLRLSCAASGFTF--S--SYGMHWARQAPGKGLE---WV
SAINTGG--G-STWYADSVKGRFTISRENAKNTLYLQ------MN-SLRAEDTAVYYCAK
-------
>V24RF-AHZZ01091598.1-ighv |(21923, 22232)|2.69209737519|(0.952,0.918,0.860)|1
-AHAQVQLVQS-GAQIKQPGASVKLSCKASGYTF--T--SYYMHWVRQAPGQGLE---WI
GLISPYN--G-NKGYAQNFQGRVTITTDTSTSTGYME------LS-SLRSEDTAVYYCTR
-------
>V25RF-AHZZ01091599.1-ighv |(2219, 2528)|2.99899600001|(1.000,0.999,1.000)|1
-VQCEVQLVES-GGGLSKPGGSLRLSCAASGFTF--S--DYNMDWVRQASGKGLE---WV
SSINTG--GG-STWYADSVKGRFTISRENAKNTLYLQ------MN-SLRAEDTAVYYCAR
-------
>V26RF-AHZZ01091599.1-ighv |(13841, 14150)|2.83212111157|(0.969,1.000,0.891)|1
-VQCEVQLVES-GGGLVQPGGSLRLSCAASGFTF--S--DNYMEWVRQAPGKGLQ---WV
GQINPNG--G-TTFLMDSVKGRFTISRDNAKNTLYLQ------TS-SLNTEDTAVYYCTR
-------
>V28RF-AHZZ01091603.1-ighv |(4407, 4716)|2.99083600705|(0.994,0.998,0.999)|1
-VLSQVQLQES-GPGLVKPSETLSLTCAVSGGSI--S--SNYWNWIRQPPGKGLE---WI
GRIYGGS--G-STDYSPSLKSRVTISTDTSKNQLSLK------LS-SVTAADTAMYYCAR
-------
>V29RF-AHZZ01097944.1-iglv |(5376, 5682)|2.99798400013|(1.000,1.000,0.998)|1
--DSETVVTQE-PSLSVSSGGTVTLTCGLSSGSV---STSNYPSWYQQTPGQAPR---TL
IYR------T-NTRPSG-VPDRFSGSI--LGNKAALT------IT-GAQADDESDYYCML
YMGSGI-
>V30RF-AHZZ01097949.1-iglv |(59447, 59759)|2.99798400013|(1.000,1.000,0.998)|1
-SWAEVVFTQP-HSVSGSPGQTVTISCTRSSGSI---DS-KYVQWYQQRPGSAPT---TV
IYE------D-NKRPSG-VPDRFSGSIDSSSNSASLT------IS-GLNSEDEADYYCQS
ADGSYN-
>V31RF-AHZZ01098200.1-trav |(876, 1169)|2.99398000014|(0.999,0.998,0.997)|1
VWSQQKEVEQNPGPLSVPEGATASLNCTYSNSA------FQNFMWYRQYSRKGPQ---LL
IYTYSSG--N-K------EEGRFTAQVDKSSKYISLF------IR-DSQPSDSATYFCAM
S------
>V33RF-AHZZ01098200.1-trav |(35496, 35783)|2.99496000066|(0.999,1.000,0.996)|1
--VNSQQGEEDPQTLSIQEGENATMNCSYKTS-------INNLQWYRQDSGRSLV---QL
ILICSNE--R-EK-----NSGRLRVTLDTSKKSSSLL------IT-ASRAADTASYFCAT
D------
>V34RF-AHZZ01098200.1-trav |(47312, 47603)|2.95851611711|(0.990,0.979,0.990)|1
-RTNGDLVTQTEGPVTLPERAALTLNCTYQTSY------SAFIFWYVQYPNKEPE---LL
LKSS-EN--Q--E--T--NSRGFQASHDKSDSSFHLE------KP-SVQLSDSAVYYCVL
R------
>V35RF-AHZZ01098200.1-trav |(50539, 50842)|2.98788400513|(0.997,0.999,0.992)|1
-SSMAQKVTQAQTEISVVEKEDVTLDCVYETRE-----NTYYLFWYKQPPSGELV---FL
IRRNSFD--E-Q----NEMNGRYDSNFQKSTSSFNLT------IT-ASQVVDSAVYFCAL
NE-----
>V36RF-AHZZ01098200.1-trav |(85982, 86269)|2.9460773318|(0.979,0.970,0.999)|1
-LSGEDQVMQSPEALSLQEGESSSLNCSYTVSG------LRGLFWYRQDPGKGPE---FL
FSLYSAG--E-EK-----EKERLKATLTKK--ESFLH------IT-GPKPEDSATYLCAV
Q------
>V38RF-AHZZ01098942.1-ighv |(3874, 4183)|2.99193200206|(0.999,0.998,0.995)|1
-VLSQVQLQES-GPGLVKPSETLSLTCAVSGGSF--S--SNYWSWICQPPGKGLE---WI
GGIYGSG--G-STYYNPSLKNRVTISTDTSKNQFSLK------LS-SVTAADTAVYYCAR
-------
>V39RF-AHZZ01098950.1-ighv |(183, 495)|2.99799600001|(0.999,0.999,1.000)|1
-VLSQVQLQES-GPGLVKPSETLSLTCAVSGYSI--SSG-YYWGWIRQPPGKGLE---WI
GYIYGNS--A-STYYNPSLKSRVTISKDTSKNQFSLK------LS-SVTAADTAVYYCAR
-------
>V40RF-AHZZ01099970.1-iglv |(6343, 6653)|3.0|(1.000,1.000,1.000)|1
-SWAEVVFTQP-HSVSGSPGQTVTISCTRSSGSI---DS-KYVQWYQQRPGSAPT---TV
IYN------D-DQRPSG-VPDRFSGSIDSSSNSASLT------IS-GLKSEDEADYYCQS
ADSSS--
>V41RF-AHZZ01099973.1-iglv |(38400, 38710)|2.99285201038|(1.000,0.994,0.999)|1
-SWAQSVLTQP-PSVSGAPGQRVTISCTGSSSNI---GAGYYVSWYQQLPGTAPK---LL
IYE------N-NKRPSG-VSDRFSGSK--SGTSASLA------IT-GLQAEDEADYYCQS
YDSSLS-
>V42RF-AHZZ01100290.1-ighv |(204, 517)|2.97506440553|(0.998,0.983,0.995)|1
-VQCEVQLVES-GGGLVQPGRFLRLSCAASGFTF--S--NYYMHWAHQAQGRGLE---WV
SLMRKKANSY-TTEYAVSVKDRFTISRDDSKNTLYLQ------MN-SLKTEDTAVYYCA-
-------
>V43RF-AHZZ01104241.1-igkv |(8110, 8412)|2.47458291336|(0.924,0.894,0.761)|1
-STGDVVMTQSPLSLPVTPGEPASISCRSSQSLLH-SSGNTYLSWFQQKPGQSAR---RL
IYK------V-SNRDSG-VPDRFTGSG--AGTDFTLK------IS-RVEAEDVGVYYCME
G------
>V44RF-AHZZ01104241.1-igkv |(24888, 25186)|2.72781695215|(0.994,0.835,0.995)|1
-SKGEIVLTQSPAFRSVTLKEKVTITCQASQS------IGSSLHWYQQKPDRSPK---LL
IKY------A-SQSISG-VPSRFSGSG--SGTDFTLT------IN-SLEAEDAATYYCQQ
SSSL---
>V45RF-AHZZ01104241.1-igkv |(53164, 53464)|2.99288400513|(1.000,0.995,0.998)|1
-TSGEIVLTQSPATLSLSPGERATLSCRASQSV------GSSLAWYQQKPGQAPR---LL
IYG------A-SSRATG-IPDRFSGSG--SGTEFTLT------IS-SLEPEDFVVYYCQK
YSSSP--
>V46RF-AHZZ01104241.1-igkv |(58624, 58924)|2.99799200002|(1.000,0.999,0.999)|1
-VRCDIQMTQSPSFLSASVGDRVTITCQASQSI------SNDLAWYQQKPGKSPT---LL
IYD------A-TNLHTG-VPSRFSGSG--SGADYSLT------IS-SLELEDFAAYYCQQ
EYSYP--
>V48RF-AHZZ01104243.1-igkv |(37856, 38148)|2.83939966024|(0.997,0.889,0.999)|1
-SRGDIVMTQSPAFVSVTPGEKVTITCQASEG------ISNYLHWYQQKPDQAPK---LF
IQY------A-SQSISG-VPSRFTGSG--SGTDFTFT------IS-SLEVEDAATYYCQQ
GN-----
>V49RF-AHZZ01104243.1-igkv |(54085, 54379)|2.99280401921|(1.000,0.993,1.000)|1
--RGDIQMTQSPSSLSASVGDRVTITCRASQSF-------SSLAWYQQKPGKAPK---LL
IYS------A-SSLQSG-VPSRFSGSK--SGTDFTLT------IS-SLQPEDVASYYCQQ
YYSYP--
>V50RF-AHZZ01104243.1-igkv |(69226, 69518)|3.0|(1.000,1.000,1.000)|1
-AKCDIQMTQSPSSLSASVGDRVTITCRASQTI------SSYLAWYQQKPGKVPK---LL
IYA------A-SSLESG-VPSRFSGSG--SGTEFTLT------IS-SLQPEDFATYYCQQ
HN-----
>V51RF-AHZZ01104760.1-ighv |(306, 615)|2.65150546287|(0.993,0.803,0.990)|1
-VQGEVQLVES-GGGLAKPGGSLRLSCAASGFTF--S--DHYMHWVRQAPGKGLE---WI
SAINSG--GG-STYYAESVKGRFTISRENAKNTLYLQ------MD-SLRAEDTAVYYCAR
-------
>V52RF-AHZZ01104761.1-ighv |(4083, 4398)|2.99698000014|(0.998,1.000,0.999)|1
-VKCEAQLMES-GGGLVQPGGSLRLSCAASGFTF--S--DHYMQWVRQAPGKGLE---WV
GLIRNKADGE-TTDYAASVKGRVTTSRDDSKSITYLQ------MN-NLKTEDTAVYYCAR
-------
>V53RF-AHZZ01104763.1-ighv |(4374, 4683)|2.99698000014|(1.000,0.998,0.999)|1
-VQCEVQLVES-GGGLAKPGGSLRLSCAASGFTF--S--DYYMDWVRQAPGKALE---WV
SGISNT--GG-STWYADSVKGRFTISRENAKNTLYLQ------MS-SLRAEDTAVYYCAR
-------
>V54RF-AHZZ01105091.1-igkv |(457, 757)|2.99899600001|(1.000,1.000,0.999)|1
-ARCDIQMNQSPSSLSASVGDTATITCRASQGI------SNNLAWYQQKPGKAPK---LL
IYA------A-SSLESG-VPSRFSGSG--SGTEFTLT------IS-SLQPEDFAAYYCQQ
YNSLP--
>V55RF-AHZZ01107544.1-trav |(5301, 5591)|2.99696400065|(1.000,1.000,0.997)|1
--VNGENVEQHPSTLSVQEGDSSVIKCTYSDSA------SNYFPWYKQELGKGPQ---FI
IDIRSNE--H-EK-----KDQRITVLLNKTAKHFSLH------IT-ETQPGDSAVYFCAA
S------
>V56RF-AHZZ01107544.1-trav |(27803, 28091)|2.9898400105|(0.998,0.992,1.000)|1
VWS-QQKVEQSSGPLSVPEGAIASLNCTYSDSG------SQSFFWYRQYSGQSPE---LL
MSTYSSG--D-K------EDGRFTAQLNRASQYVSLL------IR-DSQLSDSATYLCAV
-------
>V57RF-AHZZ01107544.1-trav |(34317, 34614)|2.66644284622|(0.993,0.948,0.832)|1
-GTRAQSVTQLDSQVSVSEGVPVLLRCNYSSSF------SPTLFWYVQYPNQGLQ---LL
LKYISGT--T-LV--K--GINGFEAEFKKSETSFHLT------KA-SAHVSDAAEYFCAV
N------
>V58RF-AHZZ01107544.1-trav |(53747, 54040)|3.0|(1.000,1.000,1.000)|1
-VSRGESVGLHLPTVSVQEGDNSVINCTYSDSA------SDYFLWYKQESGKGPQ---SI
IDIRSNM--A-KR-----QGQRLTVLLNKTMKHLSLQ------IA-ATEPGDSAVYFCAE
N------
>V59RF-AHZZ01107545.1-trav |(4983, 5284)|2.97941612211|(0.988,0.999,0.993)|1
-SGIAQKITQTQPAMFVQEKEAVTLDCTYDTSD-----QNYGLFWYKQPSSGEMI---FL
ILQMSYD--K-Q----NATEGHYSLNFQKARKSVNLV------IS-ASQVGDSATYFCAM
R------
>V60RF-AHZZ01107545.1-trav |(23299, 23593)|3.0|(1.000,1.000,1.000)|1
-RTRGDSVTQMEGPVTLSERAFLTINCTYTATG------YPSLFWYVQYPGEGPQ---LL
LKATKTD--E--K--G--SNKGFEATYRKETTSFHLK------KD-SVQESDSAVYFCAL
S------
>V61RF-AHZZ01108247.1-ighv |(744, 1053)|2.80273988855|(0.990,0.882,0.977)|1
-AHSEVQLVQS-GSEVKKPGATVKISCKASGYTF--I--DYYLHWVRQAPGKGLE---WM
GGVDPED--G-EADYAQKFQGRVTITADTSTDTAYME------LS-SLRSEDTAVYYCAR
-------
>V62RF-AHZZ01109397.1-igkv |(45, 345)|2.99899200002|(0.999,1.000,1.000)|1
-ARCDIQMTQSPSSLSASVGDRVTITCRASQGI------SSYLNWYQQKPGKAPK---LL
IYD------A-TTLQSG-VPSRFSGSG--SGTEFTLT------IS-SLQPEDFAVYYCQQ
RNSYP--
>V63RF-AHZZ01109397.1-igkv |(20176, 20476)|3.0|(1.000,1.000,1.000)|1
-ARCDIQMTQSPSSLSASVGDRVTITCQASQGI------SSWLSWYQQKPGKAPK---LL
LYK------A-SGLQSG-VPSRFSGSG--SGTEFTLT------IS-SLQPEDFATYYCQQ
FSSAL--
>V64RF-AHZZ01109398.1-igkv |(3225, 3525)|2.99899600001|(1.000,1.000,0.999)|1
-TTGEIVMTQSPATLSLSPGERATLSCRASQSV------SSRLAWYQQKPGQAPR---LL
IYD------A-SSRATG-IPDRFSGSG--SGTEFTLT------IS-SLEPEDVGVYYCQQ
SYSWP--
>V65RF-AHZZ01110760.1-ighv |(1676, 1985)|2.78246798908|(0.938,0.967,0.890)|1
-VLSQVQLQES-GPGLVKPSETLSLTCAVSGASI--S--SNWWSWIRQAPGKGLE---WI
GEINGNS--G-STNYNPSLKSRVTISKDASKSQFSLK------LS-SVTAADTAVYYCAR
-------
>V67RF-AHZZ01111405.1-ighv |(9460, 9769)|2.75153158583|(0.991,0.946,0.875)|1
-AHSQVQLVQS-GAEVKQPGSSVKVSCKASGYTF--T--NSAMQWVRQTPGQGLE---WI
GWIIIGN--G-NTNYAQKFQGRVTITRDTSTSTGYME------LS-SLRSEDTAVYYCAA
-------
>V68RF-AHZZ01113072.1-ighv |(329, 638)|2.24697310356|(0.998,0.953,0.664)|1
-VQCEVQLVES-GGGLVQPGVSLRLSCAASGFTF--S--STRMNWIRQAPGKKLE---WV
ADIKYD--GS-EKYYVDSVKGRFTISRDNAKNSLSLQ------MN-SLRAEDTAVYYCVR
-------
>V69RF-AHZZ01117753.1-igkv |(3232, 3532)|2.994900005|(1.000,1.000,0.995)|1
-ARCDIQMTQSPSSLSASVGDRVTITCRASQGI------STYLNWYQQKPGKAPK---LL
IYA------A-SRLESG-VPPRFSGSG--SGTEFTLT------IS-SLQPEDFATYYCLQ
YKSDP--
>V70RF-AHZZ01117754.1-igkv |(5922, 6221)|3.0|(1.000,1.000,1.000)|1
-TTGEIVMTQSPATLSLSPGERATLSCRASQSV------SSYLAWYQQKPGQAPR---LL
IYG------A-SSRATG-IPDRFSGSG--SGTEFTLT------IS-SLEPEDVGVYYCQQ
YNNWN--
>V71RF-AHZZ01117754.1-igkv |(31202, 31502)|2.20621985312|(0.698,0.824,0.762)|1
-TTGEIVMTQSPATLSLSPGEGATLSCRASQSV------GSYLAWYQQKPGQAPK---LL
IHS------A-YFRATG-IPDRFSGSG--SRTEFTLT------IS-SLEPEDVGVYHCQQ
YNDLP--
>V73RF-AHZZ01124687.1-ighv |(302, 609)|2.68888471933|(0.987,0.973,0.827)|1
-AHAQVQLVQS-GPEVKQPGASVKVSCKASGYTF--T--SYGMNWVRQAHGQRLE---WM
GWINTDS--G-NPTYAQGFKERFTFSMDTSISTAYLQ------IS-SLKAEDTAVYYCA-
-------
>V74RF-AHZZ01129142.1-ighv |(1012, 1321)|2.99899200002|(0.999,1.000,1.000)|1
-VLSQVQLQES-GPGVVKPSETLSLTCAVSGGSI--S-S-YWWGWIRQPPGKGLE---WI
GYIYGSG--S-STNYNPSLKSRVTISKDTSKNQFSLK------LS-SVTAADTAVYYCAR
-------
>V76RF-AHZZ01143621.1-igkv |(14221, 14507)|2.90617944683|(0.993,0.946,0.977)|1
-----IVMTQSPATLSLSPGERATLSCRASQSV------SSRLAWYQQKPGEAPR---LL
IYD------A-SSRATG-IPARFSGSG--SGTDFTLT------IS-SLEPEDVAVYFCQQ
ESNW---
>V77RF-AHZZ01150255.1-ighv |(7064, 7379)|2.97992430843|(0.986,0.999,0.996)|1
-VQCEVQLLEY-GGGLVQPGRSLRLSCAVSGFTF--S--DHYMSWVRQAPGKGPE---WV
GFMRNKANGG-RTEYAASVKGRFTISRDDSKSTASLQ------MS-SLKTEDTAVYYCAT
-------
>V78RF-AHZZ01169213.1-igkv |(5365, 5663)|2.43648046251|(0.958,0.725,0.949)|1
-TTGEIVMTQSPATLALSPGERATLSCRASQSV------SSYLAWYQQKPGQAPR---LL
IYG------A-SSRATG-IPDRFSGSG--SGTEFTLT------IS-SLEPEDVGVYFCLQ
SSNW---
>V79RF-AHZZ01176978.1-igkv |(12153, 12453)|3.0|(1.000,1.000,1.000)|1
-ARCDIQMTQSPSSLSASVGDKVTITCHASQGI------SSWLSWYQQKPGKAPK---LL
IYK------A-SSLQSG-VPSRFSGSG--SGTDYTLT------IS-SLQPEDFATYYCQQ
DSSSP--
>V80RF-AHZZ01198213.1-trav |(10234, 10524)|2.99385601037|(1.000,1.000,0.994)|1
-MSRGEDVEQSL-FLSVREGDISVINCTYTDSS------STYLYWYKQEPGAGLQ---LL
TYILSNM--D-LK-----RDQRVTVLLNKKDKHLSLR------IA-DTQTEDSAIYFCAE
S------
>V82RF-AHZZ01198214.1-trav |(53657, 53950)|3.0|(1.000,1.000,1.000)|1
-GSGKNQVEQSPQSLIILEGKNCTLQCNYTVSP------FSNLRWYKQDTGKGPI---SL
TIMTFSE--N-TK-----SNGRYTATLDADTKQSSLH------IT-AAQLSDSASYICVV
S------
>V83RF-AHZZ01198216.1-trav |(1076, 1382)|2.99798400013|(1.000,1.000,0.998)|1
VWSQQKEVEQDPGPFSVPEGATVTFNCTYSNSA------SQSFFWYRQDSRKEPK---LL
MSVYS----S-G-----NEDGRFTAQLNRASQYISLL------IR-DSQLSDSATYLCAV
YTQCSP-
>V84RF-AHZZ01198216.1-trav |(6535, 6832)|2.97560484445|(1.000,0.982,0.995)|1
-GTRAQSVTQLDSQVSVSEGVPVLLRCNYSSSV------SPYLFWYVQYPNQGLQ---LL
LKYTSGT--T-LV--K--GINGFEAEFKKSETSFHLT------KA-SAHVSDAAEYFCAV
N------
>V85RF-AHZZ01040804.1-igkv |(3190, 3490)|2.97270402421|(0.987,0.994,0.992)|-1
-TTGQVILTQSPATLSLSPGERATLSCRASQSV------SNYLAWYQQKPGQAPR---LL
IHS------A-SSRATG-IPDRFSGSG--SGTEFTLT------IS-SLEPEDVGVYHCYQ
YYSGY--
>V88RF-AHZZ01040807.1-igkv |(39921, 40221)|2.99067605248|(1.000,0.991,1.000)|-1
-AKCDIQMTQSPTFLSASVGDRVTIACRASQSI------HKGLAWYQQKPGKAPK---LL
ISY------A-SNLYTG-VPSRFSGSG--SGTDFTLT------IS-SLQPEDAATYYCFQ
YNSYP--
>V89RF-AHZZ01040808.1-igkv |(17035, 17353)|2.98960007999|(1.000,0.990,1.000)|-1
-ACGDIVMTQSPDSLAVSLGERVTINCKSSQSLLYSSNNKNYLAWYQQKPGQTPK---LL
ISW------A-STRESG-VPNRFSGSG--SGTDFTLT------IS-GLQAEDVAVYYCQQ
HYSTP--
>V90RF-AHZZ01042076.1-igkv |(7808, 8108)|2.77344698269|(0.999,0.995,0.857)|-1
-TRCAIQMTQSPSSLSASVGDRVTITCRASQSI------GSNLAWYQQKPGKVPK---LL
IYA------A-STLQSE-VPSRFSGSG--SGTDFTLT------IS-SLQPEDVATYYCQK
CDSAP--
>V91RF-AHZZ01042077.1-igkv |(2202, 2517)|2.59201478609|(0.996,0.783,0.980)|-1
-SSGDIVMTQTPLSLPVTLGEPASISCRSSQSLL-SSNEYNYLNWYLQKPGQSPQ---LL
IYY------G-SNRASG-VPDRFSGSG--SGTDFTLK------IS-RVEAEDVGVYYCMQ
ALQTP--
>V92RF-AHZZ01042078.1-igkv |(13394, 13694)|2.99383600705|(0.995,0.999,1.000)|-1
-ARCDIQMTQSPSSLSASVGDRVTITCRASQNI------YSNLAWYQQKPGKAPK---PL
IYY------A-SSLETG-VPSRFRGSG--SGTDYTLT------IS-SLQPEDIATYYCQQ
YNNSP--
>V93RF-AHZZ01042078.1-igkv |(35394, 35709)|2.5320581523|(0.981,0.879,0.816)|-1
-SSGDVVMTQSPLTLPVTPGQPASISCRSSQSLVH-SDGNTYLSWYQQKPGQPPR---LL
IYK------V-SNRYSG-VPDRFSGSG--AGTDFTLK------IS-RVEAEDVGVYYCMQ
GTKVP--
>V94RF-AHZZ01042078.1-igkv |(45757, 46072)|2.80351606499|(0.981,0.996,0.873)|-1
-SSGDIVMTQTPLSLPVTPGEPASISCRSSQSLLHS-DGYTYLDWYLQKPGQSPQ---LL
IYG------G-SNRASG-VPDRFSGSG--SGTDFTLK------IS-KVEAEDVGVYYCMQ
HRALP--
>V96RF-AHZZ01042080.1-igkv |(4422, 4722)|2.98960007999|(1.000,0.990,1.000)|-1
-ARCDIQLTQSPSSLSASVGDRVTISCRTSQNI------YSNLAWYQQKPGKTPK---LL
IYA------A-SSLQSG-IPSRFSGSG--SGTDFTLT------IS-SLQPEDVATYYCQH
GYGTP--
>V97RF-AHZZ01042080.1-igkv |(19769, 20084)|2.47188623838|(0.985,0.737,0.969)|-1
-SSGDIVMTQTPLSLPVTPGEPASISCRSSQSLL-HSNGNTYLYWYLQKPGQPPR---LL
IYR------V-SNRFSG-VPDRFSGSG--SGTDFTLK------IS-RVEAEDVGVYYCMQ
ALQNP--
>V98RF-AHZZ01042080.1-igkv |(24756, 25071)|2.70403353356|(0.974,0.881,0.903)|-1
-SSGDIVMTQTPLSLPVTPGEPASISCRSSQSLLHS-NGNTYLHWYLQKPGQSPK---LL
IYG------G-SNRASG-VPDRFSGSG--SGTDFTLK------IS-KVEVEDVGVYYCVQ
AIAFP--
>V99RF-AHZZ01042083.1-igkv |(18979, 19279)|2.99293200206|(0.996,0.997,1.000)|-1
-ARCDIHMTQSPSSLSASVGDRVTITCRASQGI------TDDLAWYQQKPGETPK---LL
IYE------A-SSLQSG-IPSRFSGSG--SGTEFTLT------IS-SLQLNDSATYYCQH
YYSYP--
>V100RF-AHZZ01042083.1-igkv |(31495, 31813)|2.6633293409|(0.982,0.871,0.891)|-1
-SRGDIMMTQTPLSLPITPGEPASISCRSSQSLLDSDDGYTYLDWYLQKPGQSPQ---PL
IYF------V-SSWASG-VPDRFSGSG--SGTDFTLK------IS-RVEAEDVGVYYCMQ
CIEFI--
>V101RF-AHZZ01042084.1-igkv |(28167, 28465)|2.98532022844|(1.000,0.999,0.987)|-1
-ARCDIQLTQSPSSLSASVGDRVTITCQASQGI------SNNLAWYQQKPGKVPK---LL
IYK------A-STLQSG-VPSRFSGSG--SGTDFTLT------IS-SLQPEDFATYYCQY
GYGI---
>V102RF-AHZZ01042085.1-igkv |(3468, 3783)|2.97802032645|(1.000,0.993,0.986)|-1
-TSGDIVMTQTPLSLPVSPGEPASISCRSSQSLLHS-DGYTYLDWYLQKPGQSPQ---LL
IYL------V-SNRASG-VPDRFSGSG--SGTDFTLK------IS-RVEAEDVGVYYCEQ
GTQLP--
>V103RF-AHZZ01042085.1-igkv |(40087, 40402)|2.59886089188|(0.961,0.867,0.852)|-1
-TSGDIVMTQTPLSLPVSPGEPASISCRSSQSLL-HSGGKTYLYWYLQKPGQSPQ---LL
IRE------V-SNRASG-VPDRFSGSG--SGTDFTLK------IS-PVEAEDVGVYYCMQ
GIQLP--
>V104RF-AHZZ01042085.1-igkv |(49587, 49887)|3.0|(1.000,1.000,1.000)|-1
-ARCDIQMTQSPSSLSASVGDRVTITCRASQGI------TNDLAWYQQKPGETPK---LL
IYE------A-SSLQSG-IPSRFSGSG--SGTDFTLT------IS-SLQPEDFATYYCQH
YYSTP--
>V105RF-AHZZ01042091.1-igkv |(7298, 7613)|2.99899600001|(1.000,1.000,0.999)|-1
-TSGDIVMTQTPLSLSVTPGEPASISCRSSQSLLHS-NGNTYLHWYLQKPGQSPQ---LL
IYL------V-SNRASG-VPDRFSGSG--SGTDFTLK------IS-RVEAEDVGVYYCMQ
GIQLP--
>V107RF-AHZZ01042093.1-igkv |(34873, 35173)|2.99280401921|(1.000,0.993,1.000)|-1
-ARCDIQMTQSPSSLSASVGDRVTITCRASQGI------NKELDWYQQKPGKAPT---LL
IYA------A-SSLQTG-VSSRFSGSG--SGTDFTLT------IS-SLQPEDVATYYCQQ
DYTTP--
>V108RF-AHZZ01042093.1-igkv |(53999, 54314)|2.80257612196|(0.960,0.931,0.921)|-1
-SSGDIVMTQTPLSLPVTPGEPASISCRSSQSLL-HSNGYTYLYWYLQKPGQSPQ---LL
MYF------A-SYRASG-VPDRFSGSG--SGTDFTLE------IS-RVEAEDIGVYYCMQ
GTQLP--
>V109RF-AHZZ01042093.1-igkv |(71557, 71872)|2.47027680789|(0.982,0.761,0.920)|-1
-YSGDIVMTQTPLSLPVIPGEPASISCRSSQSLLDS-DGYTCLDWYLQKPGQSPQ---LL
IYE------V-SNRASG-VPDRFSGSG--SVTDFTLK------IS-RVEAEDVGVYYCMQ
SIEFP--
>V111RF-AHZZ01042093.1-igkv |(102084, 102402)|2.96769025636|(1.000,0.993,0.977)|-1
-SSGDIVMTQTPLSLPVTPGEPASISCRSSQSLLDSDDGNTYLDWYLQKPGQSPQ---LL
IYE------V-SNRASG-VPDRFSGSG--SDTDFTLK------IS-RVEAEDVGVYYCMQ
STEYP--
>V112RF-AHZZ01042093.1-igkv |(120004, 120320)|2.46390692883|(0.885,0.766,0.869)|-1
-TSGDILLTQTPLSLPVTPGEPASISCRSSQSLLHS-NENTYLHWYLQKPGQSPQ---LL
ICE------V-SNRASG-VPDRFSGSG--SDTDFTLK------IN-LVEAEDVGVYYCMQ
TTQWP--
>V113RF-AHZZ01042093.1-igkv |(124902, 125217)|2.72765187213|(0.948,0.852,0.965)|-1
-SSGDIVMTQTPLSLPVTLGEPTSISCRSSQSLV-YSDGKTYLHWYLQKPGQSPQ---LL
MYL------V-SNRASG-VPDRFSGSG--SGTDFTLK------IS-RVEAEDVGVYYCMQ
TLRSP--
>V115RF-AHZZ01042093.1-igkv |(133001, 133301)|2.98478801933|(0.992,0.994,0.999)|-1
-ARCDTQMTQSLSSLFASVGDRVTITCRASQGI------NNELAWYQQKPGKAPT---LL
LYS------G-SSLHTG-VPSQFSGSG--SGTDFTLT------IS-SLQPEDVATYYCRQ
DYTTP--
>V116RF-AHZZ01042093.1-igkv |(141218, 141533)|2.52551103278|(0.989,0.771,0.946)|-1
-SSGDIVMTQTPLSLPVTPGEPSSISCRSSQSLLDS-YGYTNLNWYLQKPGQSPQ---LL
IYE------V-SNRASG-VPDRFSGSG--SGTDFTLK------IS-KVEAEDVGVYYCMQ
TPQTP--
>V117RF-AHZZ01042093.1-igkv |(150847, 151147)|2.99899600001|(1.000,0.999,1.000)|-1
-ARCDIQMTQSPSSLSASVGDRVTITCQASQGI------SNNLNWYQQKPGKTPK---LL
IYA------A-SSLQSG-IPSRFSGSG--SGTDFTLT------IS-SLQPEDFATYYCQQ
RYSAP--
>V118RF-AHZZ01042093.1-igkv |(165765, 166067)|2.76683289683|(0.999,0.877,0.956)|-1
-TSGDIVMTQTPLSLPVSPGEPASISCRSSQSLLHS-NGNTYLHWYLQKPGQSPQ---LL
IYE------V-SNWASG-VPDRFSGSG--SGTDFTLK------IS-RVEAEDVGVYYCEQ
G------
>V119RF-AHZZ01042093.1-igkv |(173599, 173899)|2.9949000027|(0.996,1.000,0.999)|-1
-ARCDIQMTQSPSALSASVGDRVTISCRASQNI------YSGLAWYQQKPGKAPK---LL
IYD------A-SGLQSG-IPSQFSGSG--SGTDFTLT------IS-SLQPEDSATYYCQH
YYDTP--
>V120RF-AHZZ01042094.1-igkv |(1120, 1438)|2.69340065147|(0.994,0.818,0.998)|-1
-TSGDIVMTQTPLSLPVTPGEPASISCRSSQSLFNSDYANTYLDWYLQKPGQSPQ---LL
IYM------L-SNRASG-VPDRFSGSG--SGTDFTLK------IS-RVEAEDVGVYYCMQ
SIEYP--
>V121RF-AHZZ01044061.1-trav |(5488, 5785)|2.68533707447|(0.931,0.822,0.995)|-1
-GLRAQLVTQPEDQVTVAERNPLTVKCTYSVSG------NPYLFWYVQYPNQGLQ---FL
LKYITGD--N-LV--K--GSYGFEAEFNKSQTSFHLK------KP-SALVSDSALYFCAV
R------
>V124RF-AHZZ01067647.1-trbv |(19172, 19469)|2.63417588067|(0.988,0.992,0.794)|-1
--PLEAQVTQNPRYLITVTGKKLTVTCSQNM-N------HDYMSWYRQDPGLGLR---QI
YYSSN-V--E-LVDKGD-IPEGYNVS-RKEKRNFPLI------LE-SPSPSQTSLYFCAS
SL-----
>V125RF-AHZZ01067647.1-trbv |(24494, 24801)|2.99393200206|(0.999,1.000,0.995)|-1
--LVDVKVTQSSRYLIKRTGEKVFLECVQDM-D------HERMFWYRQDPGLGLR---LI
YFSYD-V--K-VNEKGD-IPEGYSVS-REKKERFSLI------LG-SASTNQTSMYLCAS
SLSTA--
>V126RF-AHZZ01067647.1-trbv |(37999, 38302)|2.47765618398|(0.892,0.743,0.935)|-1
-SVFSAVVSQKPSRDVCQRGTSVTIQCQVDS-Q------LTMMFWYRQQPGLSMT---LI
ATANQGS--E-ATYESGFVIDKFPIS-RPNLTFSTLT------VS-NTNPEDSSIYLCSV
E------
>V127RF-AHZZ01067648.1-trbv |(3732, 4029)|2.97241612211|(0.989,1.000,0.984)|-1
--LMEADIYQNPRHRVIGTGKKITLECSQTM-G------HDKMYWYQQDPGMELH---LI
HYSYG-V--N-STERGD-FSSESTVS-RIRIEHFPLT------LE-STSPSHTSQYLCAS
SE-----
>V128RF-AHZZ01067649.1-trbv |(1785, 2085)|2.99598000014|(0.999,0.997,1.000)|-1
--HAEAGVSQDPRHKITKTGQNVSFKCVPIS-E------HNRLYWYRQTLGQGPE---FL
TYFQN-E--A-QQDRSGLFSDRFSAE-RPEGSISTLM------IQ-HTEQGDSAVYLCAS
SL-----
>V129RF-AHZZ01067649.1-trbv |(16676, 16973)|2.99899600001|(1.000,1.000,0.999)|-1
--HMDAGITQSPRHKITETGTPVTLRCHQTE-N------HRYMYWYRQDLGNGLR---LI
HYSYG-V--E-DTDKVE-ISDGYSVS-RSKTEDFLLT------LE-SATRSQTSVYFCAS
SE-----
>V131RF-AHZZ01067649.1-trbv |(33773, 34073)|2.29967165214|(0.812,0.719,0.803)|-1
--HTDAGVIQSPRHEVTEMGKEVTLRCEPIS-G------HSSLFWYRQSMMRGLE---FL
IYFNN-K--S-PIDDSGMPKDRFSAT-MPNASFSTLK------IQ-PSEPRDSAMYFCAS
SL-----
>V132RF-AHZZ01067649.1-trbv |(37056, 37356)|2.62932817251|(0.949,0.876,0.858)|-1
--HTDAGVIQSPRHEVTEMGKEVTLRCEPIS-G------HTYLFWYRQSMMQGLE---FL
IYFND-K--S-PIDDSGMPKDRFSAT-MPNASFSTLK------IQ-PSEPRDSAVYFCAS
SL-----
>V133RF-AHZZ01067649.1-trbv |(52456, 52756)|2.24006829526|(0.777,0.947,0.670)|-1
--LIDAGVTQTPRHKVTEMGQEVTMRCQPIL-G------HNTVFWYRQTVMQGLE---LL
VYLRN-K--A-SLDDSGMPKDRFSAE-MPDASLATLK------IQ-PSEPRDSAVYLCAS
GL-----
>V134RF-AHZZ01067649.1-trbv |(59401, 59701)|2.88273348784|(0.987,0.989,0.923)|-1
--HTEAGVTQFPSHRVIEKGQTVTLRCDPIS-G------HDYLYWYRRVMGKEIK---FL
IYFMR-A--S-VQDESGMPNKRFSAE-RTGGTYSTLK------VQ-PAELEDSGVYFCAS
SQ-----
>V136RF-AHZZ01067649.1-trbv |(69483, 69783)|2.92432267628|(0.989,0.985,0.955)|-1
--SPGEEVTQTPKHLVKGEGQKAKLYCDPIK-G------HSYVFWYQQVLRKEFK---FL
ISFQN-K--N-VFDETGMPKERFSAK-CPANSPCSLE------IQ-ATKLKDSAVYFCAS
SQ-----
>V137RF-AHZZ01067649.1-trbv |(89894, 90191)|2.96485291224|(0.998,1.000,0.970)|-1
--TVDGGITQSPKYLFRKEGQNVTLSCEQNL-N------HDAMYWYRQDPGQGLR---LI
YYSQI-V--N-DIQNGD-IAEGYSVS-RDRKESFPLT------VT-SAQRNPTAFYLCAS
SI-----
>V138RF-AHZZ01067649.1-trbv |(108243, 108543)|2.66434446456|(0.971,0.811,0.980)|-1
--SADTKVTQRPRLLVKANEQKAKMDCVPVK-G------HSYVYWYRKKLDEELK---FL
VYFQN-E--E-IIQKAEIINERFSAQ-CPQNSPCTLE------IQ-STESGDAALYFCAS
SK-----
>V139RF-AHZZ01067649.1-trbv |(117153, 117458)|2.4068861632|(0.980,0.884,0.758)|-1
--SFHAEVTQTPGYLVKGKGQKTKIDCTPEK-G------HTYVYWYQQNQNKEFT---FL
ISFQD-E--Q-VLQETELHKKRFSSQ-CPKNLPCSLE------IP-SSEPGDTALYLCAS
SQST---
>V140RF-AHZZ01067649.1-trbv |(129327, 129625)|2.97475601537|(0.988,0.993,0.994)|-1
--SMDADVTQTPRNSIAKTGKRIMLECSQTK-G------HDQMYWYRQDPGLGLR---LI
FYSFD-V--E-DINKGE-ISDGYSAS-RQEQAKFSLS------LE-SATPNQTALYFCAT
SD-----
>V141RF-AHZZ01067651.1-trbv |(1632, 1932)|3.0|(1.000,1.000,1.000)|-1
--HTGAGVSQSPRYKVTKRGQDVALRCDPIS-G------HDYLYWYQQALGQGPE---LL
TYFNY-E--A-QQDKSGLPNDRFSAD-RPEGSVSTLK------IQ-RTEQRDSAVYLCAS
SL-----
>V142RF-AHZZ01067651.1-trbv |(6692, 6982)|2.91354824291|(0.995,0.979,0.949)|-1
----DAGVTQSPTHLIKMRGQQVTLRCSPIS-G------HTSVSWYQQALGQGPQ---LI
FEYDR-K--E-ERVRGN-FLDRFSGR-QFPNYSSELN------VN-ASEMGDSALYLCAS
SL-----
>V143RF-AHZZ01067651.1-trbv |(13303, 13600)|2.99799200002|(1.000,0.999,0.999)|-1
--PGNAGVTQTPKFQILKTGQSMTLQCAQDM-N------HNYMSWYRQDPGVGLR---LI
HYSVG-A--G-VTDKGE-VSNGYNVS-RLNTEDFPLS------LE-SAASSQTSVYFCAS
SY-----
>V145RF-AHZZ01067651.1-trbv |(27974, 28285)|2.48378673554|(0.844,0.787,0.868)|-1
--PVEPGVTQSPTHLIKTRGQQVILRCSPIS-G------HSSVYWYQQALGQGPQ---FI
FEYCQ-K--E-ERGRGN-FPDRFSGR-QFPNYSSELN------VS-ALLLGDSALYLCAS
SLAQPAE
>V146RF-AHZZ01067651.1-trbv |(47891, 48187)|3.0|(1.000,1.000,1.000)|-1
--PVDAGVTQSPTHLIKTRGQQVTLRCSPIS-G------HTSVYWYQQALGQGPQ---FI
FQYYE-K--E-ERERGN-FPDRFSGR-QFPNYSSELN------VS-ALLLGDSALYLCAS
SL-----
>V147RF-AHZZ01067651.1-trbv |(55192, 55483)|2.9743601679|(0.997,0.993,0.985)|-1
----NADVTQTPKFRVLKTGQSMIVQCAQDM-K------HDYMFWYRQDPGMGLR---LI
YYSVT-A--G-ITTKGE-VPNGYNVS-RINTEDFLLR------LE-SAALSQTSVYFCAS
SY-----
>V148RF-AHZZ01067651.1-trbv |(59487, 59787)|2.99796800026|(0.998,1.000,1.000)|-1
--HTGAGVSQSPRYKVIKKGQDVALRCDPIS-G------HAALYWYQQALGQGPE---FL
TYFNY-Q--A-QPDKSGLPNDRFSAE-RSEGSVSTLT------IQ-RTEQQDSAVYLCAS
SL-----
>V149RF-AHZZ01067651.1-trbv |(68255, 68551)|2.22466192003|(0.939,0.886,0.667)|-1
--PVIAGVAQSPTHLIKTRGQQVTLRCSPIS-G------HNTVYWYQQALGQGPQ---LI
FQYYR-G--E-DRGRGN-FPERFSGH-QFPNYSSELN------VS-ALLLGDSALYLCAS
SL-----
>V150RF-AHZZ01067652.1-trbv |(695, 992)|3.0|(1.000,1.000,1.000)|-1
--PVNAGVTQTPKFQVLKTGQSMTLQCAQDM-N------HDCMYWYRQDPGMGLR---LI
HYSVG-E--G-STDKGE-VPDGYNVT-RSNTEDFPLR------LE-SAAPSQTSVYFCAS
SY-----
>V151RF-AHZZ01067652.1-trbv |(5225, 5525)|2.99596000066|(1.000,0.999,0.997)|-1
--HTGAGVSQSPRYKVTKRGQDVALRCDPIS-G------HDYLYWYQQAPGQGPE---FL
TYFQN-D--A-QRDKSGLPNDRFSAE-RTEGSVSTLK------IQ-RTEQADSAVYLCAS
SL-----
>V152RF-AHZZ01067652.1-trbv |(13142, 13432)|2.25674440155|(0.908,0.866,0.679)|-1
----DAGVTQSPTHLIKTRGQQVTLRCSPIS-G------HTSVSWYQQALGQGLQ---FI
LWYDE-E--E-ERGRGT-FPHRFSGH-QFPNYSSELN------VN-ASEVGDSALYLCAS
SL-----
>V154RF-AHZZ01067652.1-trbv |(24517, 24817)|2.99396400065|(0.999,0.999,0.996)|-1
--HTGAGVSQSPRYKVTKRGQDVALRCDPIS-G------HVALYWYQQALGQGPE---FL
TYFQN-D--A-QPDKSGLPSDRFSAE-RPEGSVSTLK------IQ-RTQQGDAAVYLCAS
SL-----
>V155RF-AHZZ01067652.1-trbv |(35002, 35298)|2.68405999734|(0.972,0.829,0.962)|-1
--SVDGGVTQSPRHLIKTTGQQVTLRCSPIS-G------HTSVSWYQQALGQGPQ---FI
FEYYE-E--K-ERERGN-FPDRFSGH-QFPNYSSELN------VN-ALEAGDSALYLCAS
SL-----
>V156RF-AHZZ01067652.1-trbv |(38310, 38607)|2.9731803079|(0.997,0.994,0.983)|-1
--LVNAGVTQTPKFQVLKTGQSMTVQCAQDM-N------YNFMYWYRQDPGVGLR---LI
HYSGA-A--G-TTDKGE-VPSGYNVS-RLNTEIFPLR------LE-SAAPSQTSVYICAS
SY-----
>V157RF-AHZZ01067652.1-trbv |(42887, 43187)|2.95487637781|(0.998,0.995,0.966)|-1
--HTGARVSQSPRYKVTKRGQDVALRCDPIS-G------HDYLYWYQQALGQGPE---LL
TYFSY-E--A-QQDKSGLPSDRFSAE-RPEGSVSTLK------IQ-RTQQWDSAMYLCAS
SL-----
>V159RF-AHZZ01067653.1-trbv |(5340, 5640)|2.985900005|(0.997,0.997,0.992)|-1
--HTGAGVSQSPSNKVTEKGKDVVLRCDPIS-G------HAVLYWYRQNLGQGLE---FL
IYFQG-K--G-AVDDSGLCSDRFSAT-RPEGSASTLK------IQ-HTEQGDSAMYFCAS
SL-----
>V160RF-AHZZ01067653.1-trbv |(10391, 10687)|2.62083299139|(0.945,0.871,0.857)|-1
--SVDTGVTQSPTHLIKTRGQQVTLRCSPIS-G------HNTVSWYQQTPGQGPQ---FI
FEYAN-E--L-RTSEGN-FPHRFSGR-QFRDYHSEMN------VS-ALELGDSALYLCAS
SL-----
>V161RF-AHZZ01067653.1-trbv |(13070, 13360)|2.97632022844|(0.997,0.984,0.996)|-1
----DCGVTQTPKHLITAIGQQVTLRCSPRS-G------DLSVYWYQQSLGQGLQ---FL
IQYYN-G--E-ERAKGN-ILERFSAQ-QFPDLHSELN------LS-SLELGDSALYFCAS
SL-----
>V163RF-AHZZ01067653.1-trbv |(43250, 43547)|2.29556671058|(0.900,0.656,0.972)|-1
--HRDAEITQSPRHKVTETGRQVTLTCHQTW-N------HNNMFWYRQDLGHGLR---LI
YYSAG-A--S-IIDKGE-VPDGYVVS-RSKTEDFPLT------LE-SATRSQTSVYFCAS
SE-----
>V165RF-AHZZ01067655.1-trbv |(10936, 11249)|2.99185201038|(0.999,1.000,0.993)|-1
--SLDTAVSQTPKYLVTQTGKNESLKCEQNL-G------HNAMYWYKQDSKKLLK---IM
FIYNN-K--E-PILN-ETVPNRFSPK-SPDKAHLNLH------IK-SVELGDSAVYFCAS
SQDTALQ
>V166RF-AHZZ01067655.1-trbv |(14360, 14657)|2.49953851943|(0.850,0.983,0.764)|-1
--PMDTGVTQTPRHLVMGMTNKKSLKCEQHL-G------HNAMYWYKQKAKKPPE---LM
FIYNF-K--E-PAEN-NSVPSRFVPE-CPDSSLFYLH------LR-ALQPEDSALYLCAS
SQ-----
>V167RF-AHZZ01067655.1-trbv |(26234, 26531)|2.99280401921|(1.000,1.000,0.993)|-1
--LVNAGVTQTPKFQVLKTGQNMTLKCAQDM-N------HDRMYWYRQDPGMGLR---LI
HYSAG-E--G-STEKGE-VSNGYNAS-RLNKKDFLLR------LE-SAAPSQTSMYFCAS
SE-----
>V168RF-AHZZ01067655.1-trbv |(28925, 29222)|2.99696400065|(1.000,1.000,0.997)|-1
--PVNAGVTQTPKFQILKTGQNMTLKCAQDM-N------HNYMYWYRQDPGMGLR---LI
HYSAG-E--G-STEKGE-VPDGYNAS-RLNPQNFLLR------LE-SAAPSQTSMYFCAS
SE-----
>V169RF-AHZZ01067655.1-trbv |(32665, 32965)|3.0|(1.000,1.000,1.000)|-1
--HTGAGVSQSPRNKVTEEGKDVVLRCDPIS-G------HTALYWYRQSLGKGLE---FL
IYFQG-N--D-APDKSGLPSGRFSAE-RTEGSVSTLK------IQ-RTEQGDSAVYLCAS
SL-----
>V171RF-AHZZ01067656.1-trbv |(14292, 14589)|2.99799200002|(1.000,0.999,0.999)|-1
--PLDTAVFQTPKYLVTQTGKKESLKCEQNL-G------HDTMYWYKQDSKKLLK---IM
FIYSN-K--E-PILN-ETVPNRFSPD-SPDKAHLNLH------IK-SVELGDSAVYFCAS
SQ-----
>V172RF-AHZZ01067656.1-trbv |(18626, 18923)|2.99799600001|(0.999,1.000,0.999)|-1
--PTDTGVTQTPKHLVMGMTNKKSLKCEQHL-G------HNAMYWYKQKAKKPPE---LM
FIYNY-E--K-LSIN-ESVPSRFSPE-CSKSSLLYLH------LR-ALQPEDSALYLCAS
SQ-----
>V173RF-AHZZ01067656.1-trbv |(37172, 37469)|3.0|(1.000,1.000,1.000)|-1
--PANADVTQSPKFQILKTGQSMTLQCAQDM-N------HNSMYWYRQDPGMGLR---LI
HYSAT-K--D-TTDPGE-VPDGYSVS-RLNKKEFLLK------LE-SAAPSQTSVYFCAS
SE-----
>V175RF-AHZZ01069458.1-ighv |(21609, 21918)|2.97339727933|(0.998,0.999,0.978)|-1
-VQCEVQLVES-GGGLVQPGASLRLSCEASGFTF--G--DYAMSWVHQAPGKGLE---WV
SSISYT--GK-NIYYADSVKGRFTISRDNAKNSLSLQ------MN-SLKTEDTAVYYCTR
-------
>V176RF-AHZZ01069458.1-ighv |(26822, 27131)|3.0|(1.000,1.000,1.000)|-1
-VQCEVQLVES-GGGLVQPGGSLRLSCAASGFTF--S--SYDMSWVRQAPGKGLE---WV
SYISNG--GG-STYYADSVKGRFTISRDNSKNTLSLQ------MN-SLRAEDTAVYYCAK
-------
>V177RF-AHZZ01069461.1-ighv |(27499, 27811)|2.99054805197|(0.992,1.000,0.999)|-1
-VLSQVQLQES-GPGLVKPPETLSLTCAVSGGSI--SDS-YYWSWIRQPPGKGLE---WI
GYIYGGS--G-STSYNPSLKSRVTLSVDTSKNQFSLK------LS-SVTAADTAVYYCAR
-------
>V178RF-AHZZ01084887.1-ighv |(16319, 16625)|2.52949920139|(0.977,0.974,0.756)|-1
--CAEVQLVQS-GAEVKRPGESLRISCKTSGYSF--T--SYWISWVRQMPGKGLE---WM
GMIDPSD--S-DTRYSPSFQGQVTISADKSISTAYLQ------WS-SLKASDTATYYCAR
-------
>V179RF-AHZZ01084890.1-ighv |(9388, 9701)|2.99899600001|(1.000,1.000,0.999)|-1
-VQCEVQLVES-GGGLVQPGGSLRLSCAASGFTF--S--NSWMNWVRQAPGKGLE---WV
ARIKSKADGE-TADYAASVKGRFTISRDDSKNTLYLQ------MN-SLKTEDTAVYYCT-
-------
>V180RF-AHZZ01084890.1-ighv |(28760, 29069)|2.65248889646|(1.000,0.801,0.998)|-1
-VQGEVQLVES-GGGLAKPGGSLRLSCAASGFTF--S--NYWMYWVRQAPGKGLE---WV
SAINTG--GG-STYYADSVKGRFTISRENAKNTLYLQ------MN-SLRAEDTAVYYCAK
-------
>V182RF-AHZZ01084892.1-ighv |(16134, 16440)|2.81996754444|(0.918,0.932,0.993)|-1
-VQCEVQLVAY-GGGLQQPGGSLRLSCGF---TF--S--DHYMSWIRQAPGKGPE---WV
GFMRNKANGG-TTEYATSVKGRFTISRADSKSMASLQ------MS-SLNTEDTAVYYCAR
-------
>V183RF-AHZZ01084892.1-ighv |(32791, 33100)|2.98421230726|(1.000,0.999,0.986)|-1
-VQCEVQLVES-GGGLVQPGGSLRLSCAASGFTF--S--DYWMDWVRQAPGKGLE---WV
SSVS-G-SSS-NTYYPDSVKGRFTISRENAKNTLYLQ------MN-SLRAEDTAVYYCAR
-------
>V184RF-AHZZ01084893.1-ighv |(12328, 12643)|3.0|(1.000,1.000,1.000)|-1
-VQCEVQLVES-GGGLVQPGRSLRLSCAASGFTF--S--NYYMDWVRQAPGKGLE---WV
GRIRNKANSY-TTEYAASVKGRFTISRDDSKNTLYLQ------MS-SLKTEDTAVYYCAR
-------
>V185RF-AHZZ01084896.1-ighv |(1010, 1319)|2.44340179796|(0.977,0.971,0.723)|-1
-VCAEVQLVQS-GAEVKRPGESLRISCKTSGYSF--T--GSWISWVRQMPGKGLE---WM
GSIYPGD--S-DTRYNPSFQGQVTISADKSISTAYLQ------WS-SLKASDTATYYCAK
-------
>V186RF-AHZZ01089506.1-iglv |(19553, 19862)|2.22157924939|(0.979,0.630,1.000)|-1
-SWAQSVLTQP-PSASEAPGQRVTISCSGSSSNI---G-SNYVNWYQQLEGKAPK---LL
IYN------N-NQRPSG-VPDRFSGSK--SGTSASLT------IS-GLQSEDEADYYCAA
WDNSLNG
>V187RF-AHZZ01089506.1-iglv |(37855, 38165)|2.98003640693|(1.000,0.985,0.996)|-1
-SLSQPVLTQP-ASLSASPGASARLTCTLSSGIN---VGSYRIYWYQQKPGSPPR---YL
LNYYSDS--D-KDQGSG-VPSRFSGSKDASANAGLLL------IS-GLQSEDEADYYCAI
-------
>V188RF-AHZZ01089506.1-iglv |(48570, 48877)|2.96886989205|(1.000,0.978,0.993)|-1
-SWAQSVLTQP-PSVSAAPGQKVTISCSGSSSNI---G-SKYVSWYQQLPGTAPK---LL
IYD------N-NKRPSG-ISDRFSGSK--SGTSATLA------IT-GLQTGDEADYYCAA
WDNSLS-
>V189RF-AHZZ01089506.1-iglv |(53590, 53897)|2.99698000014|(1.000,0.999,0.998)|-1
-SWAQSVLTQP-PSVSGDPGQRVTISCTGSSSNI---G-GYYVYWYQQLPGTAPK---LL
IYD------N-NKRPSG-VSDRFSGSK--SGTSASLT------IT-GLQPGDEADYYCGA
WDSSLS-
>V190RF-AHZZ01089506.1-iglv |(59408, 59715)|2.98574403277|(0.998,0.998,0.990)|-1
-SRAQSVLTQP-PSVSGAPGQKVTISCTGSSSNI---G-GYNVYWYQQLPGTAPK---LL
IYD------N-NKRPSG-ISDRFSGSK--SGTSASLA------IT-GLLPEDEADYYCQS
YDSSLS-
>V191RF-AHZZ01089506.1-iglv |(83472, 83782)|2.45699879873|(0.996,0.972,0.733)|-1
-SLSQPVLTQP-ASLSASPGASASLTCTFSGGIN---VAGYYIYWYQQKPGSPPR---YL
LRYKSDS--D-KGQGSG-VPSRFSGSKDASANTGILR------IS-GLQSEDEADYYCAI
-------
>V192RF-AHZZ01089506.1-iglv |(88028, 88337)|2.99396400065|(0.997,0.997,1.000)|-1
-SWAQSVLTQP-RSASEAARKSVTISCSGSSSNI---G-SNSVSWYQQLPGTAPK---LL
IYY------N-DQRASG-VSDRFSGSK--SGTSASLA------IS-GLQTEDEADYYCTA
WDDSLSG
>V194RF-AHZZ01089507.1-iglv |(10483, 10793)|2.24976842256|(0.982,0.972,0.651)|-1
-SLSQPVLTQP-ASLSASPGASASLTCTFSGGIN---VAGYYIYWYQQKPGSPPR---YL
LWYKSDS--D-KGQGSG-VPSRFSGSKDASANTGILR------IS-RLQSEDEADYYCAI
-------
>V195RF-AHZZ01089507.1-iglv |(15336, 15645)|2.26166793909|(0.997,0.984,0.655)|-1
-SWAQSVLTQP-PSASGAPGQSVTISCSGSSSNI---R-GNGVHWYQQLSGTAPK---LL
IYN------N-NQRPSG-VPDRFSGSK--SGTSASLA------IT-GLRPEDEADYYCEA
WDDSLSG
>V197RF-AHZZ01089508.1-iglv |(11286, 11596)|2.74989965254|(0.997,0.866,0.959)|-1
-SLSQPVLTQP-TSLSASPGASARLTCTLRSGIS---VGSYRIFWYQQKPGSPPR---YL
LWYKSDS--D-KHQGSG-VPSRFSGSKDASANAGILL------IS-GLQSEDEADYYCTT
-------
>V198RF-AHZZ01089508.1-iglv |(16094, 16403)|2.99174403277|(1.000,0.992,1.000)|-1
-SWAQSVLTQP-PSASGAPGQRVTISCSGSSSNI---G-SNNVYWYQQFPGTAPK---LL
IYY------S-NQRPSG-VPDRFSGSK--SGTSASLA------IT-GLRSEDEADYYCAA
WDDSLSS
>V199RF-AHZZ01090491.1-ighv |(1149, 1458)|2.99385601037|(1.000,1.000,0.994)|-1
-VQCEVQLVES-GGGLVKPGASLRLSCAASGFTF--S--SYGMHWVRQAPGKGLE---WV
SSISSDS--S-YIYYADSVKGRFTISRDNAKNSLSLQ------MN-SLRAEDTAVYYCAR
-------
>V200RF-AHZZ01090492.1-ighv |(8844, 9153)|2.6937803975|(0.997,0.962,0.837)|-1
-AHSQVQLVQS-GAEVKKPGSSVKVSCKASGYTF--T--DYYMHWVRQAPGQGLE---WM
GEINPKT--G-GTNYAQKFQGRVTMTRDTSTSTAYME------LS-SLRSEDTAVYYCAT
-------
>V201RF-AHZZ01090492.1-ighv |(11745, 12060)|2.97337780343|(0.980,0.996,1.000)|-1
-VQCEVQLVES-GGGLVQPGGSLRLSCAASGFTF--S--NHCMSWVRQAPGKGPE---WV
GLIRNKANGG-RAEYAASVKGRFTISRDDSKSIASLQ------MN-SLKTGDTAVYYCTR
-------
>V202RF-AHZZ01090494.1-ighv |(1969, 2281)|2.98885201038|(0.994,0.995,1.000)|-1
-VLSQVKLQES-GPGLVKPSETLSLTCTVSSGSI--SDS-YYWSWIRQAPGKGLE---WI
GRIYSSG--S-STNYNPSLKNRVTISTDTSKNQFSLK------LS-SVTAADTAVYYCAR
-------
>V203RF-AHZZ01090495.1-ighv |(1255, 1564)|2.75252039729|(0.957,0.982,0.856)|-1
-AQSQVQLVQS-GAEVKKPGASVKLSCKASGFTF--I--SYAISWVRQAPGQGLE---WM
GEIIPAF--G-IADYAQKFQGRVTITADTSTSTAYME------LS-SRRSEDTAVYYCAR
-------
>V204RF-AHZZ01093946.1-trav |(12355, 12645)|2.95519216959|(0.986,0.975,0.995)|-1
-VSSEDKVMQNPLSLVVHEGDTVTLNCSYEVVN------FQSLLWYKQEK-KAPT---FL
FTLTSSG--I-EK-----KSGRLSSILDKKDFFSILN------IT-ATQTRDSAVYLCAV
E------
>V205RF-AHZZ01093949.1-trav |(3892, 4191)|2.92723664903|(0.990,0.991,0.952)|-1
--VNGQQIMQIPQYQHVQEGEDFTTYCNSST-T------LNNIQWYKQRPGGHPV---FL
IMLVKSG--E-V-----KKQKRLTFQFGEAKKNSSLH------IT-ATQTTDVGSYFCAG
HSAPQ--
>V208RF-AHZZ01093949.1-trav |(61192, 61479)|2.37016112853|(0.819,0.737,0.843)|-1
--VRSQKPVQSPQVVILQEGEDAIINCNSSK-A------LYSVHWYRQKHGEAPV---FL
MILLKGG--E-Q-----KSHDKIVATFNEKKQQSSLY------LM-ASQLSYSRTYFCGA
E------
>V210RF-AHZZ01093953.1-trav |(7506, 7806)|2.43956463016|(0.901,0.795,0.816)|-1
-SSVAQKVTQAQSSVSMPVGKAVTLNCQYETSSW-----SYDLFWYKQPPSKEMI---FL
IRQGYSE--Q-N-----ARNGRYSVNFQKAASSIALT------IS-ALQLEDSATYFCAL
RE-----
>V211RF-AHZZ01096568.1-ighv |(3158, 3467)|3.0|(1.000,1.000,1.000)|-1
-VLSQVQLQES-GPGLVKPSETLSLTCAVSGGSI--S-S-SYWNWIRQAPGKGLE---WI
GRIYSSG--S-STNYNPSLKNRVTISTDTSKNQFSLK------LS-SVTAADTAVYYCAR
-------
>V212RF-AHZZ01096568.1-ighv |(16270, 16579)|2.99385601037|(1.000,0.994,1.000)|-1
-VQGEVQLVES-GGGLAKPGGSLRLSCAASGFTF--S--SYGMSWVRQAPGKGLE---WV
SAISSG--GG-STYYADSVKGRFTISRDNSKNTLSLQ------MN-SLRAEDTAVYYCAK
-------
>V213RF-AHZZ01096572.1-ighv |(422, 737)|2.98489600501|(0.993,0.994,0.998)|-1
-VQCEVQLVES-GRGLVQPGGSLRLSCAVSGFTF--S--DHYMSWVRQAPGKGPE---WV
GFMRNKANGG-RTEYAASVKGRFTISRDDSKSTPSLQ------MS-SLNTEDTAVYYCAR
-------
>V214RF-AHZZ01096574.1-ighv |(7206, 7516)|2.994900005|(1.000,1.000,0.995)|-1
-VQCEVQLVES-GGGLAQPGGSLRLSCVASGFTF--S--DHYMDWVRQAPGKGLE---WV
SSISTG-SGS-TTLYPDSVKGRFTISRDNAKNTVYLQ------MN-SLRAEDTAVYYCA-
-------
>V215RF-AHZZ01096575.1-ighv |(832, 1141)|2.97564005313|(0.996,0.993,0.987)|-1
-AHSEVQLVQS-GAEVRKPGATVKISCKASGYTF--T--DYYLSWVRQAPGKGLE---WM
GCVDPED--G-EAIYAQKFQGRVTITADTSTDTAYME------LS-SLRSEDTAVYYCAR
-------
>V216RF-AHZZ01103093.1-ighv |(4113, 4425)|2.83434858657|(0.940,0.916,0.991)|-1
-VLSQVQLQES-GPGLLKPSETLSLTCAISGGSI--SSSYHYWSWIRQAPGKGLE---WI
GYISYS---G-STNYNPSLKSRVTISTDTSKNQFSLK------LS-SVTAADTAVYYCAR
-------
>V217RF-AHZZ01103093.1-ighv |(19002, 19311)|2.45687132234|(0.991,0.998,0.721)|-1
-VLSQVQLQES-GPGLVKPSETLSLTCAVSGYSI--SSG-YYWGWIRQPPGKGLE---WI
GSIYSSG----SNYLNPSLKSRVTLSVDTSKNQFSLK------LS-SVTAADTAVYYCAR
-------
>V218RF-AHZZ01103094.1-ighv |(666, 977)|2.99696400065|(1.000,1.000,0.997)|-1
-VQCEVQLVES-GGGVVQPGGSLRLSCAASGFTF--D--DYAMGWVRQAPGKGLE---WV
SAISW--SGG-STGYADSVKGRFTISRDNAKNSLYLQ------MN-RLRAEDTALYYCAK
D------
>V219RF-AHZZ01103097.1-ighv |(667, 978)|2.99799600001|(0.999,1.000,0.999)|-1
-VQCDVQLVES-GGGLVKPGGSLRLSCVASGFTF--S--SYEMHWVRQAPGKGLE---WV
SGISTS--GG-TTYYADSVKGRFTISRDNAKNSLFLQ------MN-SLRAEDTAVYYCAK
E------
>V220RF-AHZZ01103097.1-ighv |(4629, 4936)|2.41712786625|(0.972,0.949,0.721)|-1
-VLSQVQLQES-GPGVVKPSETLSLTCAVSGYSI--SSG-YYWGWIRQPPGKGLE---WI
GSIYSSG----SNYLNPSLKSRVTLSVDTSKNQFSLK------LS-SVTAADTAVYYCA-
-------
>V221RF-AHZZ01103258.1-ighv |(1265, 1574)|2.99494800078|(1.000,0.998,0.997)|-1
-VLSQVQLQES-GPGLVKPSETLSLTCAVSGGSI--S-S-NYWNWIRQAPGKGLE---WI
GSIYSSG--S-STNYNPSLKNRVTISTDTSKNQFSLK------LS-SVTAADTAVYYCAR
-------
>V222RF-AHZZ01104243.1-igkv |(7682, 7981)|2.99088400513|(0.998,0.993,1.000)|-1
-TTGEIVLTQSPATLSLSPGERATLSCRASQSV------SSSLAWYQQKSGQAPR---LL
IYG------A-SSRATG-IPDRFSGSG--SGTDFTLT------IS-ILEPEDVAVYYCQQ
YYNWN--
>V223RF-AHZZ01105198.1-iglv |(1704, 2007)|2.99698000014|(1.000,0.998,0.999)|-1
-SWAQSALTQP-RSVSGSPGQSVTISCTGTSSDI---GGYNYVSWYQQHPGKAPK---LM
IYD------V-SKRPSG-VSDRFSGSK--SGNTASLT------IS-GLQAEDEADYYCSS
YAGS---
>V225RF-AHZZ01105199.1-iglv |(5057, 5367)|2.99196000066|(0.998,0.995,0.999)|-1
-SWAQAALTQP-PSVSKSLGQSVTISCTGTSNDI---GGYNAVSWYQQHPGTAPR---LL
IYE------V-SNRPSG-VSDRFSGSK--SGNTASLT------IS-GLQAEDEADYYCGS
YRSGST-
>V226RF-AHZZ01105199.1-iglv |(17460, 17763)|2.994900005|(1.000,0.995,1.000)|-1
-SAASYELTQP-HSVSVSPGQTARITCGGDN--I---GS-KYVQWYQQKPAQAPV---LV
IYA------D-SERPSG-IPERFSGSK--SGNTATLT------IS-GVEAGDEADYYCQV
WDSSSDH
>V227RF-AHZZ01105200.1-iglv |(22027, 22330)|2.9505734465|(1.000,0.964,0.992)|-1
-SAASYELTQP-GSVSVSPRQTARITCGGDN--I---GS-KSVHWYQQKPGQAPV---LV
IYN------D-SERPSG-IPERFSGSN--SGNTATLT------IS-GVEAGDEADYYCQV
WDSSSKY
>V230RF-AHZZ01105201.1-iglv |(63444, 63754)|2.9969280013|(0.997,1.000,1.000)|-1
-SWAQSALTQP-PSVSGSPGQSVTISCTGTSSDV---GGYNYVSWYQQHPGTAPK---LM
IYD------V-SNRPSG-VSDRFSGSK--SGNTASLT------IS-GLQAEDEADYYCCS
YTTSST-
>V231RF-AHZZ01105201.1-iglv |(75648, 75951)|2.95598664203|(0.999,0.976,0.984)|-1
-SAASYELTQP-PSVSVSPGQTARITCGGDN--I---GS-EAVHWYQQKPPQAPV---LV
IYA------D-SERPSG-IPERFSGSN--SGNTATLT------IS-GVEAGDEADYYCQV
WDISNDH
>V232RF-AHZZ01106331.1-igkv |(10056, 10356)|3.0|(1.000,1.000,1.000)|-1
-ARCDIQLTQSPSSLSASVGDRVTITCRASQGI------SSYLAWYQQKPGKAPK---LL
IYD------A-SNLQSG-VPSRFSGSG--SGTEFTLT------IS-SLQPEDFAVYYCQQ
RNSYP--
>V233RF-AHZZ01106331.1-igkv |(16128, 16428)|3.0|(1.000,1.000,1.000)|-1
-AKCDIQMTQSPSSLSASVGDRVTITCRASQGI------SSYLAWYQQKPGKAPK---PL
IYY------A-SNLESG-VPSRFSGSG--SGTEFTLT------IS-SLQPEDFATYYCQQ
YNSAP--
>V234RF-AHZZ01106331.1-igkv |(33100, 33400)|2.99074003277|(1.000,0.999,0.992)|-1
-ARCDIQMTQSPSSLSASAGDRVTITCRASQGI------STYLNWYQQKPGKAPT---RL
IYA------A-SSLQSG-VPSRFSGSG--SGTEFTLT------IS-SLQPEDFATYYCLQ
YNSAP--
>V235RF-AHZZ01106331.1-igkv |(43583, 43883)|3.0|(1.000,1.000,1.000)|-1
-TTGETVMTQSPATLSLSPGERATLSCRASQSV------GSSLAWYQQKPGQAPR---LL
VYY------A-SSRATG-IPDRFSGSG--SGTDFTLT------IS-SLEPEDVGVYYCQK
YNDWP--
>V236RF-AHZZ01107345.1-trbv |(266, 563)|2.90189671725|(0.984,0.939,0.987)|-1
--PIDSGITQTPKHLVIGMTNKKSLKCEQHM-G------HRAVYWYKQKAKKPPE---IM
FMYNY-E--T-LSIN-ESVPSRFSPE-CSKSSLLHLH------LQ-ALQPEDSALYLCAS
SQ-----
>V238RF-AHZZ01107346.1-trbv |(105930, 106243)|2.41536992486|(0.959,0.951,0.716)|-1
--SLDTAVSQTPKYLVTQTGKKESLKCEQNL-G------HDAMYWYKQDSKKLLK---IM
FSYNN-K--E-LIIN-ETVPNRISPD-SPDKAHLNLH------IK-SVELGDSAVYFCAS
SQATALQ
>V240RF-AHZZ01107395.1-igkv |(1617, 1915)|2.93384072901|(0.996,0.958,0.986)|-1
-TTGEIVMTQSPATLSLSPGERATLSCRASQSV------NSYLAWYQQKPGQAPR---LL
IYD------A-SSRATG-IPDRFSGSG--SGTDFTLT------IS-SLEPEDVAVYFCLQ
SSNW---
>V241RF-AHZZ01107399.1-igkv |(425, 725)|2.99899600001|(1.000,0.999,1.000)|-1
-AKCDIQMTQSPPSLSASVGDRVTITCQASQGI------SNWLAWYQQKPGEAPK---LL
IYA------A-STLQSG-VPSRFSGSG--SGTEFTLT------IS-SLQPEDFATYYCQQ
HNSYP--
>V242RF-AHZZ01108758.1-ighv |(6447, 6754)|2.99593600205|(1.000,0.996,1.000)|-1
-VLSQVQLQES-GPGVVKPSETLSLTCAVYGGSV--SG--SYWSWIRQAPGKGLE---WI
GEINGNS--G-STSYNPSLKSRVTISTDTSKNQFSLK------LS-SVTAADTAVYYCA-
-------
>V243RF-AHZZ01110488.1-igkv |(1345, 1645)|2.99796800026|(0.998,1.000,1.000)|-1
-ARCDIQMTQSPSSLSASVGDKVTITCHASQSI------SSWLAWYQQKPGKAPK---LL
IYK------A-SSLQSG-VPSRFSGSG--SGTDFTLT------IS-SLQPEDFATYYCQQ
YDSNH--
>V244RF-AHZZ01111138.1-igkv |(1438, 1738)|3.0|(1.000,1.000,1.000)|-1
-ARCDIQMTQSPSSLSASVGDKVTITCHASQGI------SSWLSWYQQKPGKAPK---LL
IYK------A-SSLQSG-VPSRFSGSG--SGTDFTLT------IS-SLQPEDFATYYCQQ
YSSSP--
>V245RF-AHZZ01111138.1-igkv |(3529, 3815)|2.90617944683|(0.993,0.946,0.977)|-1
-----IVMTQSPATLSLSPGERATLSCRASQSV------SSRLAWYQQKPGEAPR---LL
IYD------A-SSRATG-IPARFSGSG--SGTDFTLT------IS-SLEPEDVAVYFCQQ
ESNW---
>V246RF-AHZZ01111138.1-igkv |(14203, 14503)|2.99699200002|(0.999,1.000,0.998)|-1
-ARCDIQMTQSPPSLSASVGDRVTITCQASQSI------SNYLAWYQQKPGKAPK---LL
IYA------A-STLQSG-VPSRFSGSG--SGTEFTLT------IS-SLQPEDFATYYCQR
HNSYP--
>V247RF-AHZZ01111367.1-igkv |(1438, 1738)|3.0|(1.000,1.000,1.000)|-1
-ARCDIQMTQSPSSLSASVGDKVTITCHASQGI------SSWLSWYQQKPGKAPK---LL
IYK------A-SSLQSG-VPSRFSGSG--SGTDFTLT------IS-SLQPEDFATYYCQQ
YSSSP--
>V248RF-AHZZ01111367.1-igkv |(3529, 3815)|2.90617944683|(0.993,0.946,0.977)|-1
-----IVMTQSPATLSLSPGERATLSCRASQSV------SSRLAWYQQKPGEAPR---LL
IYD------A-SSRATG-IPARFSGSG--SGTDFTLT------IS-SLEPEDVAVYFCQQ
ESNW---
>V249RF-AHZZ01111367.1-igkv |(14330, 14630)|2.99899600001|(1.000,1.000,0.999)|-1
-ARCDIQMTQSPPSLSASVGDRVTITCQASQGI------SNYLAWYQQKPGKAPK---LL
IYA------A-STLQSG-VASRFSGSG--SGTEFTLT------IS-SLQPEDFATYYCQQ
HNSYP--
>V250RF-AHZZ01112481.1-ighv |(613, 919)|3.0|(1.000,1.000,1.000)|-1
-VLSQVQLQES-GPGVVKPSETLSLTCAVSGGSI--S--SSYWSWIRQPPGKGLE---WI
GYIYGGG----STNYNPSLKSRVTMSADTSKNQLSLK------LS-SVTAADTAVYYCAR
-------
>V251RF-AHZZ01125719.1-ighv |(24239, 24554)|2.99899200002|(0.999,1.000,1.000)|-1
-VQCEVQLVES-GGGLVQPGGSLRVSCAASGFTF--S--NHYMQWVRQAPGKGLE---WV
GFIRNKANGG-TAEYAASVKGRFTISRDDSKSIASLQ------MN-SLKTEDTAVYYCAR
-------
>V252RF-AHZZ01125719.1-ighv |(41713, 42022)|3.0|(1.000,1.000,1.000)|-1
-VQCEVQLAES-GGGLVQPGGSLRLSCAASGFTF--S--SYEMHWVRQAPGKGLE---SV
SVISGDS--S-YTHYADSVKGRFTISRDNAKNSLSLQ------MN-SLRAEDTAVYYCAR
-------
>V253RF-AHZZ01125719.1-ighv |(47992, 48299)|2.68888471933|(0.987,0.973,0.827)|-1
-AHAQVQLVQS-GPEVKQPGASVKVSCKASGYTF--T--SYGMNWVRQAHGQRLE---WM
GWINTDS--G-NPTYAQGFKERFTFSMDTSISTAYLQ------IS-SLKAEDTAVYYCA-
-------
>V254RF-AHZZ01181503.1-ighv |(302, 609)|2.68888471933|(0.987,0.973,0.827)|-1
-AHAQVQLVQS-GPEVKQPGASVKVSCKASGYTF--T--SYGMNWVRQAHGQRLE---WM
GWINTDS--G-NPTYAQGFKERFTFSMDTSISTAYLQ------IS-SLKAEDTAVYYCA-
-------
>V255RF-AHZZ01185532.1-igkv |(806, 1093)|2.98998000014|(0.997,0.998,0.995)|-1
-----TVVTQSPATLSLSPGERATISCRTSQSV------GSRLAWYQQKPGQAPR---LL
IYG------A-SNRATG-IPDRFSGSG--SGTDFTLT------IS-SLKPEDAAVYYCQQ
DNDWK--
>V256RF-AHZZ01189918.1-igkv |(12178, 12478)|3.0|(1.000,1.000,1.000)|-1
-ARCDIQMTQSPSSRSASVGDTVTITCQASQGI------SDYLAWYQQKPGKAPK---LL
IYA------A-SNLESG-VPSRFSGSG--SGTDFTLT------IS-SLQPEDFATYYCQQ
YDSDP--
>V257RF-AHZZ01189922.1-igkv |(4528, 4816)|2.99596000066|(1.000,0.997,0.999)|-1
-----IVMTQSPATLSLSLGETATISCRTSQSV------GSKLAWYQQKPGQAPR---LL
IYG------A-SSRATG-IPDRFSGSG--SGTDFTLT------IS-SLEPEDFAVYYCQE
TSNLS--
>V258RF-AHZZ01189923.1-igkv |(14019, 14319)|2.97648007169|(0.993,0.984,1.000)|-1
-ARCDIQMTLSPSSLSASVGDRVTITCRASQDI------SSYLNWYQQKPGKAPK---LL
IYY------A-TSLESG-VPSRFSGSG--SGTDFTLT------IS-SLQPEDFATYYCQQ
FKSYP--
>V259RF-AHZZ01198550.1-iglv |(8130, 8433)|3.0|(1.000,1.000,1.000)|-1
-SWAQAALTQP-HSVSGSPGQSVTISCTGTSSDI---GGYDRVSWYQQHPGKAPK---LM
IYE------V-SKRPSG-VSDRFSGSK--SGNTASLT------IS-GLQAEDEADYYCSS
YAGS---
>V260RF-AHZZ01198550.1-iglv |(32463, 32773)|2.90142641716|(0.983,0.935,0.993)|-1
-SWAQSALIQS-PSVSGSLGQSVTISCTGTSSDI---GRYNYVSWYRQQPGTTTK---LM
MYN------V-NTRPSG-VSDRFSGSK--SGNTASLT------IS-GLQAEDEADYYCSS
YEASDT-
>V261RF-AHZZ01198551.1-iglv |(10418, 10728)|2.99698000014|(0.998,1.000,0.999)|-1
-SWAQSAPTQP-PSVSGSPGQSVTISCTGTSSDI---GYYNAVSWYQQHPGTAPK---LM
IYR------V-SNRPSG-VSDRFSGSK--SGNTASLT------IS-GLQAEDEADYYCSS
YAGSDT-
>V262RF-AHZZ01198551.1-iglv |(33935, 34238)|2.95821046559|(0.999,0.976,0.986)|-1
-SAASYELTQP-PSVSVSPGQMARITCSGDA--L---PE-KYADWYQQKPGQSPV---LI
IYE------D-SKWPSG-IPERFSGSS--SGTVATLT------IS-GAQVEDEADYYCYS
TDSSGNH
>V263RF-AHZZ01198553.1-iglv |(13429, 13732)|2.44160696449|(0.993,0.968,0.728)|-1
-SVVSSELTQD-PAVSVALGQTVRITCQGDS--L---SS-YYASWYQQKPGQAPV---LV
IYG------N-NNRPSG-IPERFSVSW--SGNTGSLT------IT-GAQVEDEADYYCGS
WDSSGNH
>V264RF-AHZZ01198553.1-igkv |(31919, 32229)|2.34399473077|(0.839,0.693,0.919)|-1
-SWAQAALTQP-PSVSKSLGQSVTISCAGTSSGI---ASYSDVSWYQQHPGTAPR---LL
IYS------V-SNRPSG-VSDRFSGFK--SGSTASLT------IS-GLQAEDEAIYYCCS
YRSGST-
>V265RF-AHZZ01198553.1-iglv |(39757, 40060)|2.98488400513|(0.996,0.991,0.998)|-1
-SEASYELIQP-PSVSVSPGQTARITCSGDA--L---PD-YYAYWYQQKSGQAPM---LV
IYK------D-SERPSG-IPERFSGSS--SGTTVTLT------IS-GVQAEDEADYYCQS
ADSSGNH
>V266RF-AHZZ01198553.1-iglv |(56860, 57163)|2.99598400013|(0.998,0.998,1.000)|-1
-SATSYELTQP-PSVSAASGQTARITCGGDS--I---GS-KNVQWYQQKPAQAPV---LV
IYA------D-SKRPSG-IPERFSGSN--SGNTATLT------IS-GVEAGDEADYYCQV
WDSSSKH
>V267RF-AHZZ01198553.1-iglv |(68992, 69302)|2.99093200206|(0.998,0.999,0.994)|-1
-SWAQAALTQP-PSVSGSPGQSVTISCTGTSSDI---GGYNYVSWYQQHPGKAPK---LM
IYE------V-SKRPSG-VSDRFSGSK--SGNTASLT------IS-GLQAEDEADYYCGS
YASSST-
>V0RF-JABR01013263.1-trbv |(179, 479)|2.95616889635|(0.996,0.983,0.979)|1
--HMGAGVSQSPRYKVTKKGQDVVLSCDPIS-G------HEALYWYQQALGQGPK---FL
TYFNY-E--A-QPDKSGLPNDRFSAE-RPKGSVSTLT------IQ-RTEQRDSAVYLCAS
SL-----
>V3RF-JABR01016432.1-iglv |(27490, 27800)|2.68040268833|(0.968,0.968,0.824)|1
-SLSQPVLTQP-TSLSASPGASARLTCTLSSGIN---VGSYRIFWYQQKPGSPPR---YL
LWYKSDS--D-KHQGSG-VPSRFSGSKDASANAGILR------IS-GLHSEDEADYYCTI
-------
>V4RF-JABR01016432.1-iglv |(31781, 32090)|2.98974003277|(0.999,0.991,1.000)|1
-SWAQSVLTQP-PSASGPPGQSVTISCSGSSSNI---G-SNYVYWYQQLSGKAPK---LL
IYD------N-NKRPSG-VPDRFSGSK--SGTSASLA------IS-GLQTEDEADYYCAA
WDDSLSG
>V5RF-JABR01020048.1-igkv |(1483, 1801)|2.54836887715|(0.996,0.795,0.926)|1
-AYGDIVMTQSPDSLAVSLGERVTINCKSSQSLLYSSNNKNYLAWYQQKPGQAPK---LL
IYW------A-STRESG-VPNRFSGSG--SGTDFTLT------IS-GLQAEDMAVYYCQQ
YYSTP--
>V6RF-JABR01043229.1-iglv |(142541, 142835)|2.97080401921|(0.988,0.988,0.995)|1
------VVTQE-PLLSVSSGGTVAITCGLSSGPV---STSNYPSWYQQTPGQAPR---TL
IYS------T-NTRPSG-VPDRFSGSI--LGNKAALT------IT-GAEADDESDYYCVL
YMGSGI-
>V9RF-JABR01052882.1-trgv |(88181, 88494)|2.96290837717|(1.000,0.999,0.968)|1
-SQKSSNLEGRTKSVTRPTGSSAEITCDFSGDS------NFYIHWYLHQEGKAPQ---RL
LYYDVSN--SRDVLESGLSLGKYYTHT-RTRWSWILI------LR-NLIENDSGVYYCAT
WD-----
>V10RF-JABR01059011.1-ighv |(294, 609)|3.0|(1.000,1.000,1.000)|1
-VQCEVQLVES-GGGLVQPGGSLRLSCAASGFTF--S--NYHMSWVRQAPGKGLE---WV
GFIRNKASGG-TAEYAASVKGRFTISRDDSKSITYLQ------MN-SLKTEDTAVYYCAR
-------
>V11RF-JABR01059011.1-ighv |(15565, 15872)|2.96084466791|(0.993,0.993,0.976)|1
-VQCEVQSVES-GGGLVQPGGSLRLSCAASGFTF--S--SYWMSWVRQAPGKGPE---WV
SDIS--G--S-TIYYADSVKGRFTVSRDDAKNSLSLQ------MD-SLRAEDTAVYYCAR
E------
>V13RF-JABR01059012.1-ighv |(17062, 17386)|2.65895295177|(0.979,0.930,0.837)|1
-AHSQVQLVQS-GAEVKQPGASVKVSCKASGYTF--T--SYAMNWVRQAHGQRLE---WI
GWINTNT--G-NPTYAQGFKERFAFSMDTSISTAYLQ------IS-SLKAEDTAVYYCAR
DTVWK--
>V14RF-JABR01062345.1-ighv |(2435, 2744)|2.77681757854|(0.954,0.937,0.899)|1
-AQSQEQLVQS-GAEVKKPGASVKVSCKASGFTF--S--SDAISWVRQAPGQGLE---WM
GRIIPIL--S-RTNYAQKFQGRVTITADTSTSTAYME------LS-SLRSEDTAVYYCAR
-------
>V15RF-JABR01066987.1-ighv |(11840, 12146)|3.0|(1.000,1.000,1.000)|1
-VQCEVQLTES-GGGLVQPDGSLRLSCAASGFTF--S--SYAMQWVHQAPGKGLE---WV
SAIGP--GG--DTYYADAVKGRFTISRDNTKNSLYLQ------MN-SLRAEDTAVYYCAR
-------
>V16RF-JABR01066987.1-ighv |(19343, 19652)|2.7438034122|(0.931,0.947,0.878)|1
-AHSQEQLVQS-GAEVKKPGASVKVSCKASGFTF--D--SSAISWVRQAPGQGLE---WM
GVIIPVA--G-ITNYAQKFQGRVTITADTSTSTAYME------LS-SLRSEDTAMYYCAA
-------
>V18RF-JABR01070187.1-ighv |(7644, 7959)|2.95175367204|(0.988,0.999,0.967)|1
-VQCEVQLVES-GGGLVQPGGSLRLSCAASGFTF--S--DYYMQWVRQAPGKGLQ---WV
GLIRNKANGG-TTDYSVSVKGRCTISRDDSKSITSLQ------MN-SLKTEDTAVYYCAR
-------
>V19RF-JABR01070187.1-ighv |(14433, 14739)|2.99698000014|(1.000,0.999,0.998)|1
-VQCEMQLVES-GGGLVQPGGSLRLSCAASGFTF--S--SYDMHWVRQAPGKGLE---WV
SAISIG---G-GTYYPDSVKGRFTISRDNAKNSLYLQ------MN-SLRAEDMAVYYCAR
-------
>V20RF-JABR01071886.1-ighv |(1825, 2139)|2.31128119253|(0.839,0.682,0.898)|1
-VWSQVTLKES-GPALVKPSQTLTLTCTFSGFSI--STSGTGVGWIRQPSGKALE---WL
ASIYWN---D-SKYYSTSLKSRLTISKDTSKNQVVLT------MT-NMDPVDTATYYCAH
I------
>V21RF-JABR01074704.1-ighv |(2136, 2448)|2.99385601037|(1.000,1.000,0.994)|1
-VLSQVQLQES-GPGLVKPSETLSLTCAVSGGSI--SS-YNYWSWIRQPPGKGLE---WI
GHIYGNS--A-STNYNPSLKSRVTISKDTSKNQFSLK------LS-SVTAADTAVYYCAR
-------
>V22RF-JABR01074958.1-ighv |(126, 441)|2.36615517721|(0.950,0.684,0.983)|1
-VQCEVQLVES-GGGLVQPGGPLRLSCAASGFTF--S--DYYMPWVRQAPGKGLE---WV
GHIKNKANSY-TTEYAASVKGRFTISRDDSKNTLYLQ------MN-SLKTEDTAVYYCAT
-------
>V23RF-JABR01076259.1-igkv |(8845, 9160)|2.97997652411|(0.999,0.983,0.999)|1
-SSGDIVMTQTPLSLPITVGETASISCRSSQSLL-SSNGYNYLSWYLQKPGQSLQ---LL
IYY------G-SNRASG-VPDRFSGSG--SGTDFTLK------IS-RVEAEDIGVYYCMQ
TLQTP--
>V24RF-JABR01076260.1-igkv |(856, 1158)|2.60447591431|(0.925,0.894,0.827)|1
-STGDVVMTQSPLSLPVTPGEPASISCRSSQSLLH-SSGNTYLSWFQQKPGQSPR---RL
IYK------V-SNRDSG-VPDRFTGSG--AGTDFTLK------IS-RVEAEDVGVYYCME
G------
>V25RF-JABR01076260.1-igkv |(17028, 17326)|2.81146636542|(1.000,0.874,0.999)|1
-SKGEIVLTQSPAFRSVTPKEKVTITCRASQS------IGSSLHWYQQKPDQSPK---LL
IKY------A-SQSISG-VPSRFSGSG--SGTDFTLT------IN-SLEAEDAATYYCQQ
SSSF---
>V26RF-JABR01076261.1-igkv |(12124, 12424)|2.22464681149|(0.992,0.634,1.000)|1
-TTGEIVLTQSPAILSLSPGERATFSCRASQSI------GSNLAWYQQKPGQAPR---LL
IYG------A-SSRATG-IPDRFSGSG--SGTEFTLT------IS-SLEPEDFAVYYCQK
YSSSP--
>V27RF-JABR01076261.1-igkv |(17937, 18237)|2.4214833174|(0.960,0.859,0.773)|1
-VRCDIQMTQSPSFLSASVEDTVTITCQVSQSI------SNDLAWYQQKPGKSPT---LL
IYD------A-TNLHPG-FPSRFSGSG--SGADYSLT------IS-SLELEDFAAYYCQQ
EYSYP--
>V28RF-JABR01076261.1-igkv |(78882, 79179)|2.9696826523|(0.998,0.974,1.000)|1
--RCDIQMTQSPSSLSASVGDRVTITCRASQSF------SSSLAWYQQKLGKAPK---LL
IYG------A-SSLQSG-IPSRFSGSK--SGTDFTLT------IS-SLQPEDVAAYYCQQ
YYSYP--
>V30RF-JABR01076261.1-igkv |(111081, 111379)|3.0|(1.000,1.000,1.000)|1
-ARCDIQMTQSPSSLSASVGDRVTITCRASQGI------SSYLNWYQQKPGKAPK---LL
IYA------A-SSLASG-VPSRFSGSG--SGTEFTLT------IS-SLQPEDFAAYYCQQ
YNSA---
>V31RF-JABR01076261.1-igkv |(121606, 121906)|2.35934331846|(0.976,0.684,0.989)|1
-TTGEIVMTQSPATLSLSPGERATLSCRASQS------AGSNLAWYQQKPRQAPR---LL
IYG------A-SSRATG-IPARFSGSG--SGTDFTLT------IS-SLEPEDVGIYYCQQ
YNDWP--
>V32RF-JABR01076261.1-igkv |(164504, 164804)|3.0|(1.000,1.000,1.000)|1
-ARCDIQMSQSPSSLSASVGDRVTITCQASQGI------SNALAWYQQKPGKAPK---LL
IYD------A-SSLDSG-VPSRFSGSG--SGTEFTLT------IS-SLQPEDFATYYCQQ
YNSDP--
>V33RF-JABR01076263.1-igkv |(15350, 15650)|2.99593600205|(1.000,1.000,0.996)|1
-ARCDIQMTQSPSSLSASVGDRVTITCQASQGI------SSYLSWYQQKPGKAPK---LL
IYK------A-SSLASG-VPSRFSGSG--SGTEFTLT------IS-SLQPEDFAAYYCQQ
HNSLP--
>V34RF-JABR01076263.1-igkv |(29170, 29470)|2.32578349447|(0.997,0.801,0.806)|1
-ARCDIQMIQSPSSLPASVGDRVTITCRASQGI------SSYLNWYQQKPGKAPK---LL
IYY------A-TTLQSG-VPSRFSGSG--SGTEFTLT------IS-SLQPEDFAAYYCLQ
HNSDP--
>V35RF-JABR01076263.1-igkv |(35502, 35802)|3.0|(1.000,1.000,1.000)|1
-ARCDIQMTQSPSSLSASVGDRVTITCQASQGI------SSWLAWYQQKPGKAPK---LL
IYK------A-SSLQSG-VPSRFSGSG--SGTEFTLT------IS-SLQPEDFATYYCQQ
HNSNP--
>V36RF-JABR01076263.1-igkv |(51711, 52011)|2.97484034555|(1.000,0.987,0.989)|1
-TTGEIVMTQSPATLSLSPGERATLSCRASQSV------SSRLVWYQQKHGQAPT---LL
IYG------A-SSRATG-IPARFSGSG--SGTDFTLT------IS-SLEPEDVGVYYCQQ
DYSWP--
>V37RF-JABR01076263.1-igkv |(105623, 105923)|3.0|(1.000,1.000,1.000)|1
-ARCDIQMTQSPSSLSASVGDTVTITCQASQGI------SSYLAWYQQKPGKAPK---LL
IYA------A-STLQSG-VPSRFSGSG--SGTDFTLT------IS-SLQPEDFATYYCQQ
YNSNP--
>V38RF-JABR01076263.1-igkv |(125399, 125698)|2.98183600705|(0.991,0.995,0.996)|1
-TTGEIVMTQSPATLSLSPGERATLSCRASQSV------GSYLAWYQQKPGQAPR---LL
IYG------A-SSRATG-IPDRFSGSG--SGTEFTLT------IS-SLEPEDFAVYFCQH
YNNWN--
>V39RF-JABR01076264.1-igkv |(9604, 9904)|2.56879145254|(0.986,0.993,0.766)|1
-ARCDIQMTQSPSSLSASIGDTVTITCHASQSI------SSWLAWYQQKPGKAPK---LL
IYK------A-SSLQSG-VPSRFSGRG--SGTDFTLT------IS-SLQPEDFATYYCQK
CNSNP--
>V40RF-JABR01076265.1-igkv |(8185, 8485)|2.9700882474|(1.000,1.000,0.973)|1
-TTGEIVMTQSPATLSLSPGERATLSCRASQSV------SSYLAWYQQKPGQAPR---LL
IYG------A-SSRATG-IPARFSGSG--SGTDFTLT------IS-SLEPEDVAVYYCQQ
GSNLP--
>V41RF-JABR01076266.1-igkv |(4594, 4894)|3.0|(1.000,1.000,1.000)|1
-ARCDIQMTQSPSSLSASVGDRVTITCQASQGI------SNYLAWYQQKPGKAPK---LL
IYK------A-STLQSG-VPSRFSGSG--SGTDFTLT------IS-SLQPEDFATYYCQQ
GNSYP--
>V42RF-JABR01076266.1-igkv |(22548, 22848)|2.99899600001|(1.000,1.000,0.999)|1
-ARCDIQMTQSPSSLSASVGDRVTITCQASQGI------SSYLAWYQQKPGKAPK---LL
IYD------A-STLQSG-VPSRFSGSG--SGTDFTLT------IS-SLQPEDFAAYYCQQ
GNSNP--
>V43RF-JABR01080842.1-trav |(1737, 2024)|2.34577730718|(0.934,0.684,0.950)|1
-LSGEDQVTQSPEALRLREGESSSLNCSYTVSS------LRGLLWYRQDPGKGPE---FL
FILYSAG--E-EK-----EKERLKATLTKK--ESFLH------IT-GPKPEDSATYLCAV
Q------
>V44RF-JABR01088351.1-igkv |(10561, 10879)|2.98548011776|(1.000,0.989,0.997)|1
-TSGDIVMTQTPLSLPVTPGEPASISCRSSQSLLDSDDGYTYLDWYLQKPGQSPQ---LL
IYE------V-SNRASG-VSDRFSGSG--SGTDFTLK------IS-RVEAEDVGVYYCMQ
SIEYP--
>V45RF-JABR01088351.1-igkv |(62711, 63011)|3.0|(1.000,1.000,1.000)|1
-ARCDIQMTQSPSSLSASVGDRVTITCRASQSI------NKELSWYQQKPGKAPT---LL
IYA------A-SSLQTG-VSSRFSGSG--SGTDFTLT------IS-SLQPEDVATYYCLQ
DYTTP--
>V46RF-JABR01088351.1-igkv |(74390, 74708)|2.34368902196|(0.868,0.688,0.920)|1
-SSGEIVMTRTPLSLPITPGEPASISCRSSQSLMDGDDGFTYLYWYLQKPGQSPQ---LL
MHF------A-SYRASG-VPDRFSGSG--SGTDFTLE------IS-KVEAEDIGVYYCMQ
ALELP--
>V47RF-JABR01088351.1-igkv |(103867, 104182)|2.59407495899|(0.998,0.776,0.999)|1
-SSGDIVMTQTPLSLPVIPGEPASISCRSSQSLLHS-NGYTYLDWYLQKPGQSPQ---LL
IYL------G-SNRASG-VPDRFSGSG--SGTDFTLK------IS-RVEAEDVGVYYCMQ
ALEFP--
>V48RF-JABR01088351.1-igkv |(113703, 114003)|2.98464005313|(0.999,0.990,0.996)|1
-ARCDIQMTQSPSSLSASVGDRVTITCRASQGI------SNDLAWYQQKLGETPK---LL
IYD------A-SSLQSG-IPSRFSGSG--SGADFTLT------IS-SLQPEDFATYYCQH
YYSAP--
>V49RF-JABR01088351.1-igkv |(136166, 136466)|2.99799200002|(1.000,0.999,0.999)|1
-ARCDIQMTQSPSSLSASVGDRVTISCQASQNI------YSNLGWYQQKPGKAPK---LL
IYA------A-STLQSG-VPSRFSGSG--SGTDFTLT------IS-SLQPEDVATYYCQH
GYSTP--
>V50RF-JABR01088351.1-igkv |(159354, 159654)|2.9969280013|(0.997,1.000,1.000)|1
-ARCDIQMTQSPSSLSASVGDRITITCQASQGI------SNDLAWYQQKPGESPK---LL
IYE------A-SSLQSG-IPSRFSGSG--SGTDFTLT------IS-SLQPEDFATYYCQH
YYSTP--
>V51RF-JABR01088351.1-igkv |(170244, 170542)|2.98253608204|(0.999,0.989,0.995)|1
-ARCDIQMTQSPSSLSASVGDRVTISCQASESI------SDYLNWYQQKPGKAPK---LL
IYA------A-STLQSV-VPSRFSGSG--SGTDFTLT------IS-SLQPEDFATYYCQH
GYGT---
>V52RF-JABR01089346.1-ighv |(860, 1169)|2.98974003277|(0.999,1.000,0.991)|1
-AQSQVQLVQS-GAEVKKPGASVKVSCKASGYNF--R--SYAISWVRQAPGQGLE---WM
GVIIPIR--S-RTSYAQKFQGRVTITADTSTSTAYME------LS-SLRSEDMAVYYCAR
-------
>V54RF-JABR01091180.1-ighv |(15340, 15652)|2.67876244809|(0.993,0.811,0.999)|1
-VLSQVQLQES-GPAVVKPSETLSLTCAVSGGSI--S-SYYYWSWIRQPPGKGLE---WI
GYIYGSG--G-STYYNPSLKSRVTISTDTSKNQFSLK------LS-SVTAADTAVYYCAR
-------
>V55RF-JABR01091180.1-ighv |(60296, 60605)|2.99599200002|(0.998,0.999,0.999)|1
-VQCEVQLVES-GGGLVQPGGSLRLSCAASGFTF--S--SYWMSWVRQAPEKGLE---WV
SYINSD--GS-STSYADSMKGRFTISRDNAKNSLYLQ------MN-SLRAEDRAVYYCVR
-------
>V56RF-JABR01091180.1-ighv |(68033, 68348)|2.99596800026|(1.000,0.998,0.998)|1
-VQCEVQLVES-GGGLVQPGGSLRISCAASGFTF--S--SSAMHWVRQASGKGLE---WV
GRIRSKSKNY-ATDYAASVKGRFTISRDDSKNTAYLQ------MN-SLKTEDTAVYYCTT
-------
>V57RF-JABR01091180.1-ighv |(78923, 79238)|2.99899600001|(1.000,0.999,1.000)|1
-VQCEVQLVES-GGGLVQPEGSLRLSCAASGFTF--S--SYYMHWVRQAPGKGLE---WV
GLIKNKANSY-TTEYAASVKGRFTISRDDSKNTLYLQ------MS-SLKTEDTAVYYCAR
-------
>V58RF-JABR01092448.1-trbv |(783, 1083)|2.40512696394|(0.896,0.749,0.851)|1
--HTDAGVIQSPRHEVTEMGKEVTLRCEPIS-G------HSSLFWYRQTMMRGLE---FL
IYFNN-K--S-PIDDSGMPKDRFSAK-MPDASFSTLR------IQ-PSEPRDSAVYFCAS
SL-----
>V59RF-JABR01092448.1-trbv |(15339, 15639)|2.24968130732|(0.783,0.898,0.670)|1
--LIDAGVTQTPRHKVTEIGQEVTMRCQPIL-G------HNTVFWYRQTMMQGLE---LL
VYLRN-K--A-SLDDSGMPKDRFSAE-MPDASLATLK------IQ-PSEPRDSAVYLCAS
GL-----
>V62RF-JABR01092448.1-trbv |(32724, 33024)|2.52517321848|(0.921,0.884,0.791)|1
--SPGEEVTQTPKHLVKGEGQKAKLYCAPIT-G------HSYVFWYQQVLKKEFK---FL
ISFQN-E--D-VVDETQMPKERFSAK-CPRNSPCSLE------IQ-ATKLKDSATYFCAS
SQ-----
>V63RF-JABR01092448.1-trbv |(49780, 50073)|2.26189115853|(0.872,0.770,0.734)|1
--LSNAGITQNPRHLVRRRGQEARLRCSPMK-G------HSHVYWYQQLPEEGLK---FM
VYLQK-E--K-IIDESGMPKERFSAE-FPKEGPSILR------IQ-QAEQEDSAAYFCAS
-------
>V64RF-JABR01092448.1-trbv |(70823, 71123)|2.32074559064|(0.955,0.686,0.933)|1
--STDTKVTQRPRLLVKANEQKAKMECVPIK-G------HSYVYWYRKKLDEELK---FL
VYFQN-E--V-IIQKAEIINERFSAQ-CPQNSSCTLE------IQ-STESGDAALYFCAS
SK-----
>V65RF-JABR01092448.1-trbv |(79737, 80037)|2.97864005313|(0.997,0.988,0.994)|1
--SFHAKVTQTPGYLVKGKGQKTKMDCTPEK-G------HTFVYWYQQNQNKEFT---FL
ISFQS-E--Q-VLQETELHKKRFSSQ-CPKNPPCSLE------IL-SSEPGDTALYLCAS
SQ-----
>V66RF-JABR01092448.1-trbv |(88946, 89244)|2.9498222392|(0.993,0.989,0.970)|1
--SMDADVTQTPRNMIAKTGKRIMLECSQTK-G------HDQMYWYRQDPGLGLR---LI
YYSFD-V--K-DINKGE-ISDGYSVS-RQEQAQFSLS------LE-SATPNQTALYFCAT
SD-----
>V67RF-JABR01092448.1-trbv |(97426, 97723)|2.99696400065|(1.000,1.000,0.997)|1
--LMEADIYQNPRHRVIGTGKKITLECSQTM-G------HDKMYWYQQDPGMELH---LI
HYSYG-V--N-STERGD-FSSESTVS-RIRIEHFPLT------LE-SASPSHTSQYLCAS
SE-----
>V68RF-JABR01092448.1-trbv |(131672, 131969)|2.40263203815|(0.876,0.920,0.714)|1
--PLEAQVTQNPRHLITVTGKKLTVTCSQNM-N------HEYMSWYRQDPGLGLR---QI
YYSIN-V--E-VIDKGD-IPEGYNVS-RKEKTNFPLI------LE-SPSPSQTSLYLCAS
SL-----
>V69RF-JABR01092448.1-trbv |(137251, 137558)|2.94382941374|(0.995,0.959,0.995)|1
--LVDVKVTQSSRHLIKRMGEKVFLECVQDM-D------HERMFWYRQDPGLGLQ---LI
YFSYD-V--K-VNEKGD-IPEGYSVS-REKKERFSLI------LG-SASTNQTSMYLCAS
SLSTA--
>V71RF-JABR01095741.1-trbv |(145128, 145441)|2.20799031263|(0.954,0.984,0.625)|1
--SLDTAVSQTPKYLVTQMGKKESLKCEQNL-G------HDTMYWYKQDSKKLLQ---IM
FSYNN-K--E-LIIN-ETVPNRISPD-SPDKAHLILH------IK-SLELGDSAVYFCAS
SQGTALQ
>V72RF-JABR01095741.1-trbv |(149740, 150037)|2.94642008525|(0.988,0.979,0.980)|1
--PTDAGVTQTPKHLVMGMTNKKSLKCEQHM-G------HRAMYWYKQKAKKPPE---IM
FMYNY-E--Q-LSIN-ESVPSRFSPE-CSKSSLLNLH------LQ-ALQPEDSALYLCAS
SQ-----
>V73RF-JABR01095742.1-trbv |(5770, 6070)|2.91921046559|(0.986,0.973,0.963)|1
--HTEPEVTQTPSHRVTQMGQEVILRCVPIS-N------HLYFYWYRQILGQKVE---FL
VYFYN-D--E-ISEKSEIFDDRFSVG-RPDGSNFTLK------IK-STKLEDSAMYFCAS
SE-----
>V77RF-JABR01189674.1-iglv |(736, 1045)|2.99594800078|(0.997,0.999,1.000)|1
-SWAQSVLTQP-PSASGAPGQSVTISCSGSSSNI---R-GNGVHWYQQLSGTAPK---IL
IYN------N-NQRPSG-VPDRFSGSK--SGTSASLA------IT-GLRSEDEADYYCEA
WDDSLSA
>V78RF-JABR01196792.1-trbv |(5405, 5708)|2.96993200206|(0.989,0.993,0.988)|1
-SVFSALVSQKPSRDVCQRGTSVTIQCQVDS-Q------VTMMFWYRQQPGQSLT---LI
ATANQGS--E-ATYEGGFVIDKFPIS-RPNLTFSTLT------VS-NTSPEDSSIYLCSV
E------
>V79RF-JABR01004697.1-ighv |(11840, 12149)|2.99899600001|(1.000,0.999,1.000)|-1
-VQGEVQLVES-GGGLVQPGGSLRLSCAASGFTF--G--DYAMSWVRQAPGKGLE---WV
SYISSA--SS-TIYYADSVKGRFTISRDNAKNTLSLQ------MN-NLRAEDTAVYYCAK
-------
>V81RF-JABR01004697.1-ighv |(71645, 71954)|2.76763093133|(0.945,0.989,0.866)|-1
-AHSQVQLVQS-GAEIKQPGASVKVSCKASGYTF--T--SYYMHWVRQAPGQGLE---WI
GLISPYN--G-NTGYAQNFQGRVTMTTDTSTSTGYME------MS-SLRSEDTAVYYCTR
-------
>V82RF-JABR01004698.1-ighv |(7380, 7689)|2.79020103418|(0.914,0.908,0.993)|-1
-VQCELQLVES-GGDLVQPGGYMRLSCAASGFTF--S--NYCISWVCQAPEKGLE---WV
SRINRD--GS-STYYADSMKGQVTISRENAKNTLYLQ------MN-NLRAEDKAVYYCTR
-------
>V83RF-JABR01004698.1-ighv |(16088, 16403)|3.0|(1.000,1.000,1.000)|-1
-VQCEVQLVES-GGGLVQPGGSLRLSCAASGFTF--S--SSAMHWVRQASGKGLE---WV
GRIRSKSNNY-ATDYAASVKGRFTISRDDSKNTLYLQ------MN-SLKTEDTAVYYCTT
-------
>V84RF-JABR01011024.1-ighv |(77, 386)|2.99296000066|(0.997,0.996,1.000)|-1
-VQCEVQLVES-GGGLAKPAGSLRLSCAASGFTF--S--SYGMHWVRQAPGKGLE---WV
SYINSG--GG-STRYADSVKGRFTISRDNAKNTLYLQ------MD-SLRAEDTAVYYCAR
-------
>V85RF-JABR01032523.1-igkv |(5692, 6004)|2.35158949792|(0.828,0.756,0.793)|-1
-CNGDIVLTQSPASLAVSPGQRATITCRASESVNF-FG-INLIHWYQQKPGQPPK---LL
IYQ------V-SNKDTG-VPARFSGIG--SGTDFTLT------IN-PVEADDAANYYCLQ
SKNFP--
>V86RF-JABR01035059.1-ighv |(16381, 16696)|3.0|(1.000,1.000,1.000)|-1
-VQCEVQLVES-GGGLVQPGGSLRLSCAASGFTF--S--NYWMGWVRQAPGKGLE---WV
GRIKKTTDGG-TAEYAASVKGRFTISRDDSKNTLYLQ------MN-SLKTEDTAVYYCAR
-------
>V87RF-JABR01035059.1-ighv |(36195, 36504)|2.95989637729|(0.998,0.966,1.000)|-1
-VQGEVQLVES-GGGLAKPAGSLRLSCAASGFTF--S--SYWMNWVRQAPGKGLE---WV
SAINS--GGG-STYYADSVKGRFTISRDNSKNMLYLQ------MN-NLRAEDTAVYYCAR
-------
>V88RF-JABR01035060.1-ighv |(7723, 8038)|3.0|(1.000,1.000,1.000)|-1
-VKCEAQLMES-GGGLVQPGGSLRLSCAASGFTF--S--DHYMQWVRQAPGKGLE---WV
GLIRNKADGE-TTDYAASVKGRVTISRDDSKSITYLQ------MS-SLKTEDTAVYYCAR
-------
>V89RF-JABR01035060.1-ighv |(11223, 11532)|2.99385601037|(1.000,0.994,1.000)|-1
-VLSQVQLQES-GPGLVKPSETLSLTCAVSGGSL--S-G-YYWGWIRQPPGKGLE---WI
GYISGSS--G-STNYNPSLKSRVTISTDTSKNQFSLK------LS-SVTAADTAVYYCAR
-------
>V90RF-JABR01035060.1-ighv |(22673, 22982)|2.69019077212|(1.000,0.820,0.992)|-1
-VQGEVQLVES-GGGLVQPEGSLRLSCAASGFTF--S--SYGMSWVRQAPGKGLE---WV
AVIWYD--GS-QKYYADSVKGRFTISRDNAKNTLYLQ------MD-SLRAEDTAVYYCAK
-------
>V91RF-JABR01035060.1-ighv |(72220, 72526)|2.40969510859|(0.989,0.997,0.703)|-1
--CAEVQLVQS-GAEVKRPGESLKISCKTSGYSF--T--SYWISWVRQMPGKGLE---WM
GMIYPGD--S-DTRYSPSFQGQVTISADKSISTTYLQ------WS-SLKASDTATYYCAK
-------
>V93RF-JABR01039937.1-trav |(16162, 16450)|2.97593200206|(0.993,0.994,0.989)|-1
-LSGELKVGQNPLFLSTQEGRNYTVYCNYSTAS-------DRLYWYRQNPGKSLE---SL
FVLLSNG--A-VK-----QEGRLMASLDTKARLSTLY------IT-AALQDLSATYFCAV
-------
>V94RF-JABR01041956.1-igkv |(1660, 1960)|2.75434302471|(0.889,0.925,0.974)|-1
-TAGQVILTQSPATLSLSTGEIATLSCRASQSV------NRYLAWYQQKPGQAPR---LL
IYG------A-SSRATG-IPDRFSGSG--SGTEFTLT------IS-SLEPEDVGVYHCYQ
YNSRY--
>V95RF-JABR01049702.1-ighv |(5414, 5728)|2.994900005|(1.000,1.000,0.995)|-1
-VQCEVQLVES-GGGLVQPGGSLRLSCAASGFTF--S--DHYLSWVRQAPGKGLE---WV
SFMRNNANGG-RTEYAASVKGRCTISRDDSKSITSLQ------MS-SLKTEDTAVYYCAR
-------
>V96RF-JABR01055994.1-ighv |(3382, 3691)|2.98886400565|(0.997,1.000,0.992)|-1
-AQSQVQLVQS-GAEVKKPGASVKLSCKASGYTF--T--SYNINWVRQAPGQGLE---WM
GWINPSS--G-STGYAQNFQGRVTMTRDTSTSTAYME------LS-SLRSEDTAVYYCAR
-------
>V98RF-JABR01061517.1-igkv |(25345, 25645)|2.99698000014|(0.998,1.000,0.999)|-1
-ARCDIQMTQSPSSLSASVGDRVTITCRSSQGI------NNYLSWCQQKPGKAPK---PL
IYY------A-SSLETG-VPSRFSGSG--SGTDFTLT------IS-SLQPEDIATYYCQQ
YDNLP--
>V99RF-JABR01063291.1-ighv |(13950, 14265)|2.96611631225|(0.986,1.000,0.981)|-1
-VQCEVQLVES-GGGLVQPGGSLRLSCAASGFTF--S--NHYMHWVHQAPGKGLE---WV
GFIRNNANGA-TTEYAASVKGRFTISRDDSKSVASLQ------MN-SLKTEDTAVYYCAR
-------
>V101RF-JABR01064858.1-igkv |(492, 807)|2.67809566879|(0.971,0.838,0.941)|-1
-SSGDVVMTQSPLSLPVTPGQPASISCRSSQSLVH-SDGNTYLSWFQQKPGQPPR---RL
IYK------V-SNRDSG-VPDRFSGSG--AGTDFTLK------IS-RVEAEDVGVYYCLQ
GTYFP--
>V102RF-JABR01067077.1-igkv |(7134, 7447)|2.49060438312|(0.934,0.982,0.733)|-1
-SSGDVVMTQTPLSLSVTPGEPASISCRSSQSLLHS-NGNTYLHWYLQKPGQSPQ---LL
IYK------V-TNRESG-IPDRFSGSA--SGTDFTLK------IN-RVEHEDVGVYYCMQ
STKF---
>V103RF-JABR01068488.1-ighv |(524, 833)|2.93906440553|(0.984,0.987,0.969)|-1
-AQSQVQLVQS-GAEVKKPGASVKVSCKASGYNF--R--SSAISWVRQAPGQGLE---WM
GVIIPIL--S-RTNYAQKFQGRVTITADTSTSTAYME------LS-SLRSEDTAVYYCTR
-------
>V104RF-JABR01071855.1-iglv |(8003, 8306)|2.99798400013|(1.000,0.998,1.000)|-1
-SWAQSALTQP-PSVSGSPGQSVTISCTGTSSDV---GGYNYVSWYQQHPGTAPK---LM
IYD------V-SNRPSG-VSDRFSGSK--SGNTASLT------IS-GLQAEDEADYYCCS
YAGS---
>V105RF-JABR01071855.1-iglv |(31384, 31694)|2.98120030738|(0.998,0.984,1.000)|-1
-SWAQSALTQP-RSVSGSPGQSVTISCTGTSNDV---GSYNSVSWYQQHPGKAPK---LV
IYE------V-SKRPSG-VSDRFSGSK--SGNTASLT------IS-GLQAEDEADYYCSS
YAGSGT-
>V106RF-JABR01071855.1-iglv |(60946, 61249)|2.9824040992|(1.000,0.993,0.990)|-1
-SAASYELTQP-PSVSVSPGQTARITCSGDT--L---PD-NYAYWFQQKPGQSPV---LI
IYE------D-SKRPSG-IPERFSGSS--SGTVATLT------IS-GAQVEDEADYYCYS
SDSSGNH
>V107RF-JABR01071855.1-iglv |(71726, 72036)|2.94562728311|(0.999,0.956,0.998)|-1
-SWAQSALTQP-PSVSGSPGQSVTISCTGTSSDI---GGYNYVSWYQQHPGTALK---LM
IYG------V-SNRPSG-VSDRFSGSK--SGNTASLT------IS-GLQAEDEADYYCSS
YSSSYY-
>V111RF-JABR01071856.1-iglv |(45472, 45775)|2.99798400013|(1.000,1.000,0.998)|-1
-SWAQSALTQP-RSVSGSPGQSVTISCTGTSNDV---GSYNSVSWYQQHPGKAPK---LV
IYE------V-SKRPSG-VSDRFSGSK--SGNTASLT------IS-GLQAEDEADYYCCS
YTTS---
>V113RF-JABR01071856.1-iglv |(64968, 65271)|2.96417355698|(0.997,0.976,0.993)|-1
-SVVSSELTQD-PAVSVALGQTVKITCQGDS--L---SS-YYASWYQQKPGQVPV---LV
IYG------N-SNRPSG-IPDRFSGSY--SGNTASLT------IT-GAQVEDEADYYCGS
WDSSGNY
>V114RF-JABR01071856.1-iglv |(85218, 85521)|2.9338228881|(0.999,0.946,1.000)|-1
-SAASYELTQP-PSESVSPGQTARITCGGDN--I---GS-KAVHWYQQKPAQVPV---LV
IYS------D-SNRPSG-IPERFSGSN--SGNTATLT------IS-GVEAGDEADYYCQV
WDSSSDH
>V116RF-JABR01071856.1-iglv |(104914, 105217)|2.98642016586|(1.000,0.988,0.999)|-1
-SWAQSALTQP-RSVSGSPGQSVTISCTGTSSDI---GGYNLVSWYQQHPGTAPK---LV
IYD------V-SKRPSG-VSDRFSGSK--SGNTASLT------IS-GLQAEDEADYYCCS
YAGS---
>V117RF-JABR01071856.1-iglv |(114426, 114723)|2.9179362071|(0.975,0.996,0.951)|-1
-SVASYELTQP-PSVSVSPGQTARITCSGDV--L---KE-NYADWYQQKPGQAPV---LV
IHE------D-SKRPSG-IPEQFSGST--SGDTNTLT------IS-SSLSEDEADYYCFS
GNENN--
>V118RF-JABR01071856.1-iglv |(122751, 123054)|2.99280401921|(1.000,0.993,1.000)|-1
-SAASYDVTQP-QSVSVSPGQTARITCGGDN--I---GS-KAVHWYQQKPAQAPV---LV
IYD------D-SERPSG-IPERFSGSN--SGNTATLT------IS-GVEAGDEADYYCQV
WDSSSDH
>V119RF-JABR01071859.1-iglv |(21796, 22105)|2.99496000066|(0.999,0.996,1.000)|-1
-SWAQSVLTQP-PSASEAARKSVTISCSGSSSNI---G-SNRVSWYQQLPGTAPK---LL
IYN------N-NQRPSG-VPDRFSGSK--SGTSASLA------IS-GLQTEDEADYYCAA
WDDSLSS
>V122RF-JABR01071860.1-iglv |(31436, 31745)|2.98208440501|(1.000,0.985,0.998)|-1
-SWAQSVLTQP-PSVSGVPGQKVTISCTGSSSNI---G-GYYVQWYQQLPGTAPK---LL
IYQ------D-NKRPSG-VSDRFSGSK--SGTSASLA------IT-GLQSEDEADYYCGT
WDSSLNG
>V123RF-JABR01071860.1-iglv |(36557, 36866)|3.0|(1.000,1.000,1.000)|-1
-SWAQSVLTQP-PSVSGAPGQKVTISCTGSSSNI---G-GYYVSWYQQLPGTAPK---LL
IYQ------D-NKRPSG-ISDRFSGSK--SGTSASLA------IT-GLQTEDEADYYCQS
YDSSLSG
>V124RF-JABR01071861.1-iglv |(13029, 13339)|2.65197460799|(0.897,0.906,0.856)|-1
-SLSQPVLTQP-ASLSASPGASASLTCTFSGGIN---VAGYHIHWYQQKPGSPPR---YL
LWYKSDS--D-KHQGSG-VPSHFSGSKDASANTGILR------IS-GLQSEDEADYYCAI
-------
>V125RF-JABR01071861.1-iglv |(18449, 18758)|2.98976801985|(1.000,0.993,0.997)|-1
-SWAQSVLTQP-PSASGIPGQSVTISCSGSSSNI---G-SNNVYWYQQFPGTAPK---LL
IYN------N-NQRPSG-VPDRFSGSK--SGTSASLA------IS-GLRSEDEADYYCEA
WDDNLSG
>V127RF-JABR01071862.1-iglv |(60745, 61055)|2.56620202013|(0.993,0.948,0.788)|-1
-SLSQPVLTQP-ASLSASPGASASLTCTFSSGIN---VAGYTIHWYQQKPGSPPR---YL
LRYKSDS--D-KHQGSG-VPSRFSGSKDASANTGILR------IS-GLQSEDEADYYCAI
-------
>V128RF-JABR01071862.1-iglv |(65675, 65984)|2.99594800078|(0.997,0.999,1.000)|-1
-SWAQSVLTQP-PSASGAPGQSVTISCSGSSSNI---R-GNGVHWYQQLSGTAPK---IL
IYN------N-NQRPSG-VPDRFSGSK--SGTSASLA------IT-GLRSEDEADYYCEA
WDDSLSA
>V129RF-JABR01071862.1-iglv |(83033, 83345)|2.994900005|(1.000,0.995,1.000)|-1
-SWAQSVLTQP-PSVSGTPGQRVTISCTGSSSNI---GVGYYVSWYQQLPGTAPK---LL
IYQ------D-NKRPSG-ISDRFSGSK--SGTSASLA------IT-GLQSEDEADYYCQS
YDNSLSG
>V130RF-JABR01071862.1-iglv |(111105, 111415)|2.95093047006|(0.999,0.960,0.998)|-1
-SLSQPVLTQP-TSLSASPGASARLTCTLSSGIN---VGSYRIFWYQQKPGSAPR---YL
LSYYTDS--D-KHQGSG-VPSRFSGSKDASANAGILL------IS-GLQSEDEADYYCMI
-------
>V131RF-JABR01071862.1-iglv |(116435, 116744)|2.98793200206|(0.997,0.993,0.998)|-1
-SWAQSVLTQP-RSASGTPGQRVTISCSGSSSNT---G-SNYVSWYQQLPGTAPK---PL
IYY------D-DKQASG-VSDRFSGSK--SGTSASLA------IS-GLQSEDEADYYCAT
WDNSLSG
>V133RF-JABR01077601.1-iglv |(19390, 19700)|2.97530822856|(0.997,0.984,0.995)|-1
-SWANFMLTQP-HSVSGSVGQKVVISCTRSSGSI---GS-YYVQWYQQRPGSAPT---TV
IYD------D-NERPSG-VPDRFSGSIDSSSNSASLT------IS-GLETEDEADYYCQS
YDSSS--
>V135RF-JABR01077601.1-iglv |(59589, 59901)|2.99798400013|(1.000,0.998,1.000)|-1
-SWAEVVFTQP-HSVSGSPGQTVTISCTRSSGSI---GS-YYVQWYQQRPGSAPT---TV
IYN------D-NKRPSG-VPDRFSGSIDSSSNSASLT------IS-GLKSEDEADYYCQS
AADSYS-
>V136RF-JABR01077603.1-iglv |(14585, 14894)|2.9899000027|(0.999,0.995,0.996)|-1
-VDSETEVTQE-PSLSVSPGGTVTLTCGLSSGSV---STSNYPSWYQQTPGQAPR---MI
IYN------T-NTRPSG-VPDRFSGSI--LGNKAALT------IT-GAEADDESDYYCVL
YMGSGI-
>V137RF-JABR01077916.1-ighv |(11011, 11320)|3.0|(1.000,1.000,1.000)|-1
-VQCEVQLVES-GGDLVKPGGSLRLSCVASGFTF--S--SYAMHWVRQAPGKGLE---WV
SVISTSG--G-STYYADSVKGRFTISRDNAKNSLSLQ------MN-SLRAEDTAVYYCAR
-------
>V138RF-JABR01077916.1-ighv |(16007, 16319)|2.98057605748|(0.995,0.986,1.000)|-1
-VLSQVQLQES-GPGLVKPLETLSLTCAVSGYSI--SS-GYYWSWIRQPPGKGLE---WI
GRIYGSS--G-STDYNPSLKSRVTISKDTSKNQFSLK------LS-SVTAEDTAVYYCAR
-------
>V139RF-JABR01077917.1-ighv |(3891, 4200)|2.98159608|(0.997,0.987,0.998)|-1
-VLSQVQLQQW-GEGLVKPSETLSLTCAVSGGSI--S--SYWWSWIRQPPGKGLE---WI
GEINGNS--G-STNYNPSLKSRVTISTDTSKNQFSLK------LS-SVTAADTAVYYCAR
-------
>V140RF-JABR01077917.1-ighv |(15725, 16034)|2.92331040301|(0.987,0.975,0.964)|-1
-VQCEVQLVES-GGGLVQPGGFLRLSCAGSGFAF--S--SYGMDWVRQAPGKGLE---WV
AVISY--DGS-QKYYADSVKDRFTISRDNSKNMLYLQ------MN-NLRAEDTAVYYCAK
-------
>V141RF-JABR01078980.1-ighv |(7987, 8296)|2.99194800078|(0.997,1.000,0.995)|-1
-AQSQEQLVQS-GAEVKKPGASVKVSCKASGFTF--D--SYAISWVRQAPGQGLE---WM
GWIVPDY--D-ITNYAQKFQGRVTITADTSTSTAYME------LS-SLRSEDTAVYYCAR
-------
>V142RF-JABR01086102.1-ighv |(13684, 13993)|2.96035913276|(0.998,0.992,0.973)|-1
-AQSQEQLVQS-GAEVKKPGASVKVSCKASGYTF--S--SYAISWVRQAPGQGLE---WM
GVINPIV--G-ITNYAQKFQGRVTITADTSTSTAYME------LS-SLRSEDTAVYYCAR
-------
>V143RF-JABR01088213.1-trbv |(2386, 2682)|2.97080001921|(0.993,0.992,0.986)|-1
--SVDAGVTQSPTHLIKMRGQQVTLRCSPIS-G------HNSVSWYQQALGQGPQ---LI
VQYYR-E--Q-ENGRGN-FPERFSGH-QFPNYSSELN------VS-ALLLVDSALYLCAS
SL-----
>V145RF-JABR01088213.1-trbv |(27616, 27913)|2.97961205453|(0.995,0.999,0.986)|-1
--HMDAGITQSPRHKITETGTPVTLRCHQTE-N------HRYMYWYRQDLGYGLR---LI
HYSYG-V--E-DTDKVE-VSDGYSVS-RSKTEDFLLT------LE-SATHSQTSVYLCAS
SE-----
>V148RF-JABR01088214.1-trbv |(9866, 10166)|2.98280001921|(0.997,0.990,0.996)|-1
--HTCAGVSQSPRYKVTKRGQDVTLRCDPIS-G------HEYLYWYQQVPGQGRE---FL
TYFQN-D--A-QLDKSGLPSDRFSAE-RPEGSISILK------IQ-RTEQGDSAVYLCAS
SL-----
>V149RF-JABR01088214.1-trbv |(18277, 18573)|2.42768516185|(0.983,0.827,0.816)|-1
--PVDTGVTQSPTHLIKTRGQQVILRCSPIS-G------HSSVSWYQQALGQGPQ---FI
FEYYK-E--E-ERERGN-FPERFSGR-QFPNYSSELN------VN-TLEMGDSALYLCAS
SL-----
>V150RF-JABR01088214.1-trbv |(26048, 26345)|2.40140095306|(0.985,1.000,0.698)|-1
--PGNADVTQTPKFQVLKTGQSMTLQCAQDM-N------HNYMYWYRQDPGMGLR---LI
HYSVG-A--G-ITDKGD-VPNGYNVS-RLNTEDFPLR------LE-LAALSQTSVYFCAS
SD-----
>V151RF-JABR01088214.1-trbv |(38458, 38754)|2.58065863741|(0.970,0.963,0.781)|-1
--SVDAGVTQSPTHLIKTRGEQVTLRCSPIS-G------HSSVSWYQQALGQGPQ---FI
FEYYE-K--A-ERGRGN-FPERFSGL-QFPNYSSELN------VN-ALLLGDSALYLCAS
SL-----
>V152RF-JABR01088214.1-trbv |(45860, 46151)|2.98521630725|(1.000,1.000,0.986)|-1
----NAGVTQTPKFQVLKTGQSMTVQCTQDM-N------HNYMYWYRQDPGMGLR---LI
YYSVT-A--G-ITTKGE-VSNGYNVS-RINTEDFLLR------LE-SAAPSQTSVYFCAS
SY-----
>V153RF-JABR01088215.1-trbv |(4946, 5242)|2.96984443764|(0.998,0.990,0.983)|-1
--PVQAGVTQSPTYLIKRRGQQVTLRCSPIS-G------HTSVSWYQQALGQGPQ---FI
FEYSN-E--L-RTSEGN-FPDRFSGR-QFRNYHSEMN------VS-ALELGDSALYLCAS
SF-----
>V154RF-JABR01088215.1-trbv |(7599, 7895)|2.95438267424|(0.998,0.997,0.964)|-1
--SVDSGVTQTPKHLITAIGQQVTLRCSPRS-G------DLSVYWYQQSLGQGLQ---FL
IQYYN-G--K-ERAKGN-ILERFSAQ-QFPDLHSELN------LS-SLELGDSALYFCAS
SL-----
>V158RF-JABR01088215.1-trbv |(64243, 64539)|2.99696400065|(1.000,1.000,0.997)|-1
--PVNAGVTQTPKFQVLKTGQSMILQCAQDM-N------HDYMYWYRQDPGMGLR---LI
HYSVG-A--G-ITDKGE-VSNGYSVS-RSNTEDFPLR------LE-SAAPSQTSVYFCAS
SY-----
>V163RF-JABR01088215.1-trbv |(106852, 107152)|2.95330075255|(0.984,0.971,1.000)|-1
--HTGAGVSQSPRYKVSKRGQEVALRCDPIS-G------HAALYWYQQALGQGPE---LL
TYFNY-E--A-QQDKSGLLSDRFSAE-RPEGSVSTLT------IE-RTEQGDSAVYLCAS
SL-----
>V165RF-JABR01088216.1-trbv |(3479, 3776)|2.991900005|(0.999,0.999,0.994)|-1
--PANAGVTQSPKFQILKTGQSMTLQCAQDM-N------HNSMYWYRQDPGMGLR---LI
HYSVA-E--N-TTDTGE-VPDGYSVS-RLKKKDFLLR------LE-SAAPSQTSVYFCAS
SE-----
>V166RF-JABR01088216.1-trbv |(16712, 17025)|2.52846093309|(0.982,0.810,0.885)|-1
--PLDTAVSQTLKYLVTQTGEKESLKCEQNL-G------HNAMYWYKQDSKKLLQ---IM
FIYNN-Q--E-PILN-ETVPDRFSPK-SPDKAHLILH------IK-SVELGDSAVYFCAS
SQDTALQ
>V169RF-JABR01088216.1-trbv |(32988, 33285)|2.99899200002|(0.999,1.000,1.000)|-1
--PVNAGVTQTPKFQILKTGQSMTLQCAQDM-N------HNYMYWYRQDPGMGLR---LI
HYSVG-K--G-STDTGE-VPDGYSVS-RSNLQNFMLR------LE-SAAPSQTSVYFCAS
SE-----
>V171RF-JABR01092598.1-ighv |(8862, 9169)|2.74956068306|(0.990,0.879,0.939)|-1
-AHSEVQLVQS-GAEVRKPGATVKISCKASGYTF--T--GYYLHWVRQAPGKGLE---WM
GLVDPED--G-EANYAQKFQGRVTMTADTSTDTAYME------LS-SLRSEDTAVYYCA-
-------
>V172RF-JABR01098590.1-trav |(5160, 5460)|2.97592430843|(1.000,0.987,0.990)|-1
-FSMAQTVTQSQPEMSVQEAETVTLSCTYDTSD-----SDYYLFWYKQPPSRQMI---LI
IRQEAYK--Q-Q----NATENRFSVNFQKAAKSFSLK------IS-DSQLGDAAGYFCAY
R------
>V173RF-JABR01098592.1-trdv |(18652, 18953)|2.78161093835|(0.999,0.997,0.860)|-1
-SSMAQTVTQSQPEMSVQEAETVTLNCTYDTSE-----SNYYLFWYKQPPSRQMI---LI
IRQEAYK--Q-Q----NAKENRFSVNFQKAAKSFSLK------IS-DSQLGDAAMYFCAF
M------
>V175RF-JABR01098593.1-trav |(29181, 29471)|2.58020777517|(0.892,0.798,0.931)|-1
-VSSEDKVVQNPLSLVVHEGDTVTLNCSYEVIN------FRSLLWYKQEK-KAPT---FL
FMLTSSG--F-DK-----KKGRLSGILDKKELFSILN------IT-ATQTRDSAIYLCAV
E------
>V176RF-JABR01098595.1-trav |(1678, 1977)|2.55939586679|(0.980,0.991,0.762)|-1
--VNGQQIMQIPQYQHVQEGEDFTTYCNSST-T------LNNIQWYKQRPGGHPV---FL
IVLVKSG--E-V-----KKQKRLTFQFGEAKKNSSLH------IT-ATQTTDVGTYFCAG
HSAPQ--
>V177RF-JABR01098595.1-trav |(12709, 12999)|2.25578695659|(0.947,0.674,0.901)|-1
--TIIDAKTTQPTSMDCAEGRGANLPCNHSTIS-----GNEYIYWYRQIHSQGPQ---YV
IHGLKNN--E--------TNAMASLIITEDRKSSTLI------LP-HATLRDTAVYYCIV
RV-----
>V183RF-JABR01098597.1-trav |(9844, 10131)|2.38652589709|(0.945,0.702,0.950)|-1
-LSGEDQVTQSPEALRLQEGQSSSLNCSYTASN------LRGLLWYRQDPGKGPE---FL
FILYSAG--E-EK-----EKERLKATLTKK--ESFLH------IT-GPKPEDSATYLCAV
Q------
>V184RF-JABR01098597.1-trav |(21891, 22182)|2.30484773634|(0.881,0.660,0.979)|-1
-VSSKQEVTQIPAALSVPEGDNLVLNCSFTDSA------IYNLQWFRQDPGKGLT---SL
LLIQSSQ--R-EQ-----TSGRLNASLDKSSRHSTLY------IT-ASEPGDSATYLCAV
-------
>V185RF-JABR01098598.1-trav |(19033, 19320)|2.98174002125|(0.995,0.988,0.999)|-1
--VNSQQGEEDPQALSIQEGENATMNCSYKTS-------IDNLQWYRQDSGRSLV---RL
ILIRSNE--R-EK-----SSGRLRVTLDTSKKSSSLL------IT-ASRAADTASYFCAT
D------
>V186RF-JABR01098598.1-trav |(25184, 25475)|2.97806440553|(0.997,1.000,0.982)|-1
-RTNGDSVTQTEGPVTLPERAALTLNCTYQTSY------SAFMFWYVQYLNKEPE---LL
LKSS-EN--Q--E--T--DSRGFQASHVKSDSSFHLE------KL-SVQLSDSAVYYCVL
R------
>V187RF-JABR01098598.1-trav |(28683, 28986)|2.9349882524|(0.990,0.963,0.985)|-1
-SSMAQKVTQAQTEISVVEKEDVNLDCVYETRD-----STYYLFWYKQPPSGELI---FL
IRQNSFN--E-Q----NEINGRYSSNFQKSTSSFNLT------IT-ASQVVDSAVYFCAL
NE-----
>V188RF-JABR01098599.1-trav |(7776, 8069)|2.9939280013|(1.000,0.997,0.997)|-1
VWSQQKEVEQNPGPLSVPEGATASLNCTYSNSA------FQYFMWYKQYSRKGPQ---LL
IYTYSSG--D-K------EDGRFTAQVDKSSKYISLF------IR-DSQPSDSATYFCAM
S------
>V190RF-JABR01098600.1-trav |(14202, 14490)|2.9654040992|(0.983,0.990,0.993)|-1
VWS-QQKVEQNSGSLSVPEGAIASLNCTYSDRG------SQSFLWYRQYSGQSPE---LL
ISTYSSG--D-K------EDGRFTAQLNKASQYVSLL------IR-DSQLSDSATYLCVV
-------
>V191RF-JABR01098600.1-trav |(20988, 21285)|2.92715364218|(0.994,0.958,0.981)|-1
-GTRAQSVTQLDSQVSVSEGVPVLLRCNYSSSF------SPSLFWYVQYPNQGLQ---LL
LKYISGT--A-LV--K--GINGFEAEFKKSETTFHLT------KA-SAHVSDAAEYFCAV
S------
>V192RF-JABR01098600.1-trav |(26541, 26838)|3.0|(1.000,1.000,1.000)|-1
-TARAQSVTQPDIHITVSEGASLELRCNYSYGA------TPSLFWYVQSPGQGLQ---LL
LKYFSGD--T-LV--Q--GIKGFEAEFKRSQYSFNLR------KP-SVHWSDAAEYFCAA
G------
>V193RF-JABR01098600.1-trav |(40729, 41022)|2.95610320239|(0.998,0.973,0.988)|-1
-VSRGESVGLHLPTVSVQEGDNSVINCTYSDSV------SDYFLWYKQESGKGPQ---FI
IDIRSNM--A-KR-----QGQRLTVLLNKTVKHLSLQ------IA-ATEPGDSAVYFCAE
N------
>V194RF-JABR01098600.1-trav |(52617, 52918)|2.92866172079|(0.988,0.967,0.976)|-1
-SGIAQKITQTQPAMFMQEKEAVTLDCTYDTSD-----QNYGLFWYKQPSSGEMI---FL
IHQESYD--K-Q----NATEGRYSLNFQKARKSINLI------IS-ASQVGDSAMYFCAM
R------
>V196RF-JABR01098601.1-trav |(15930, 16220)|2.99799600001|(0.999,1.000,0.999)|-1
--VNGENVEQHPSILSVQEGDSSVIKCTYSDSA------SNYFPWYKQELGKGPQ---LI
IDIRSNV--H-EK-----KDQRITVLLNKTAKHFSLH------IT-ETQPGDSAVYFCAA
S------
>V197RF-JABR01098603.1-trav |(9193, 9499)|2.99798400013|(1.000,1.000,0.998)|-1
VWSQQKEVEQDPGPFSVPEGATVTFNCTYSNSA------SQSFFWYRQDSRKEPK---LL
MSVYS----S-G-----NEDGRFTAQLNRASQYISLL------IR-DSQLSDSATYLCAV
RTQCSP-
>V198RF-JABR01098603.1-trav |(14624, 14921)|2.26855962926|(0.979,0.752,0.820)|-1
-GTRAQSVTQLDSQVSVSEGVPVLLRCNYSSPV------SPNLFWYVQYPNQGLQ---LL
LKYTSGT--T-LV--K--GINGFKAEFKKSETSFHLT------KA-SAHVSDAAEYFCAV
S------
>V199RF-JABR01098604.1-trav |(11404, 11694)|2.99899600001|(1.000,1.000,0.999)|-1
-MSRGEDVEQSL-FLSVREGDISVINCTYTDSS------STYLYWYKQEPGAGLQ---LL
TYILSNT--D-LK-----QDQRLTVLLNKKDKHLSLR------IA-DTQTGDSAIYFCAE
S------
>V201RF-JABR01098604.1-trav |(37115, 37402)|2.93800040988|(0.983,0.968,0.988)|-1
-ANGENQVEQSPRFLGPQQGDVAFMSCMYSVSR------FNNLQWYRQNTGTGPK---HL
FSMYSAG--Y-EK-----QKGRLNATLL--KNGSSLY------IT-AMQPEDSATYFCAV
D------
>V202RF-JABR01098604.1-trav |(64438, 64732)|2.99294800078|(0.996,0.999,0.998)|-1
-EINGDSVVQTEGQVLLSEGDSLIVNCSYESTQ------YPSLFWYVQYPGEGPQ---LL
LKAMMAN--D--K--E--SNKGFEATYHKETTSFHLK------KD-SVQESDSAVYFCAL
S------
>V203RF-JABR01098604.1-trav |(77658, 77951)|2.98660803841|(0.991,0.998,0.998)|-1
-GSGKNQVEQSPQSLIILEGKNCTLQCNYTVSP------FNNLRWYKQDTGKGPI---SL
TIMTFSE--N-TK-----LNGRYTATLDADTKQSSLH------IT-ATQLSDSASYICVV
S------
>V207RF-JABR01184607.1-trbv |(64, 364)|2.98057605748|(0.995,1.000,0.986)|-1
--HTGAGVSQSPRNKVTEKGKDVALRCDPIS-G------HTVLYWYRQNLGQGLE---FL
IYFRG-T--G-AVDDSGLRSDQFSAT-RPEGSDSTLK------IQ-CTEQRDSAMYFCAS
SL-----
>V208RF-JABR01190886.1-ighv |(459, 765)|2.9681523093|(0.993,0.997,0.979)|-1
--CAEVQLVQS-GAEVKRPGESLKISCKTSGYSF--T--SYWISWVRQMPGKGLE---WM
GMIYLGD--S-DTRYSPSFQGQVTISADKSISTTYLQ------WS-SLKASDTATYYCAK
-------
>V0RF-AGCE01061995.1-trbv |(4895, 5202)|2.96420529852|(0.993,1.000,0.973)|1
--PVTAGVTQTPKFQVLKSGQSMTLQCAQDM-N------HDGMYWYRQDPGMGLR---LI
HYSVG-E--G-TTAKGE-VPDGYNVS-RSNTKDFPLR------LE-AAAPSHTSVYFCAS
SDSTV--
>V1RF-AGCE01061995.1-trbv |(16809, 17122)|2.98985201038|(0.999,0.998,0.993)|1
--PLDSAVSQTPKYLVTQMGKKESLKCEQNL-G------HDTMYWYKQDSKKLLK---IM
FIYNN-K--E-PILN-ETVPNRFSPE-SPDKAHLNLH------IE-SLELGDSAVYFCAS
SQDTALQ
>V2RF-AGCE01061995.1-trbv |(20780, 21093)|2.34996269803|(0.918,0.844,0.735)|1
--PMDTGVTQTPKHLVMGMAHNKSLKCEQNL-G------HNAMYWYKQKAKMPLE---LM
FIYSF-Q--K-QTEN-NSVSSRFTPE-CPDSSHLHLH------LH-ALQPEDSALYLCAS
SQDTALQ
>V3RF-AGCE01061995.1-trbv |(27181, 27477)|2.29402997922|(0.926,0.750,0.798)|1
--LGEAGVTQTPRHLIKMRGQQVTLRCSPVS-G------HNRVFWYQQAPGQGPQ---FL
FNYYN-E--M-QRQKGN-FPDRFSGH-QFSNHSSEMN------VS-ALELGDSALYLCAS
SL-----
>V4RF-AGCE01061995.1-trbv |(36451, 36748)|2.94896483513|(0.999,1.000,0.957)|1
--PVNAGVTQTPKFQVLKTGQSITLQCAQDM-N------HDRMYWYRQDPGMGLR---LI
HYSVG-E--G-TTAKGE-VPDGYKVS-RSNTKDFPLR------LE-AAVPSQTSMYFCAS
SD-----
>V9RF-AGCE01061998.1-trbv |(1696, 1993)|2.95843912445|(0.994,0.969,0.998)|1
--HGDAEITQSPRHKGTETGRQVTLKCHQTW-N------HNYMYWYRQDLGHGLR---LI
HYSYG-V--Q-DINKGE-VSDGYVAS-RSNLEDFPLT------LE-SALSSQTSVYFCAS
SD-----
>V10RF-AGCE01062000.1-trbv |(935, 1235)|2.5353256383|(0.862,0.883,0.805)|1
--QTDAGVIQSPRHKVTQMGQSVTLRCEPIS-G------HNDLLWYRQTLVQTLE---LL
SYFRS-Q--T-RVDDSEMPQDRFSAE-MPNASFSSLR------IQ-PTEPRDSALYLCAS
TF-----
>V11RF-AGCE01062000.1-trbv |(15550, 15847)|2.96964403777|(0.991,0.983,0.996)|1
--HGDAEITQSPRHKVTKTRRQVTLKCHQTW-N------HNYMYWYRQDLGHGLR---LI
HYSVA-A--D-NTEKGE-VSHGYVVS-RSNTEDFPLT------LE-SATHSQTSVYFCAS
SD-----
>V12RF-AGCE01062000.1-trbv |(27286, 27586)|2.25555624085|(0.721,0.822,0.758)|1
--CTDTGIIQSPKHEVTEMGQAVTLRCEPIL-G------HNLLFWYRQTLVQGLE---LL
SYFRG-R--S-IIDDEQMPKDRFSAE-RPDGSFSTLR------IQ-PAEQGDSAVYICAS
RL-----
>V13RF-AGCE01062002.1-trbv |(433, 734)|2.91690279134|(0.989,0.978,0.955)|1
----NAGVTQTPKFQVLKKGQSMTLQCAQDV-N------YDCMYWYRQDPGMGLR---LI
YYSVD-E--G-ITDKGE-VHHGYNVS-RSNREDFPLR------LE-AAALFQTSVYFCAI
SASTV--
>V15RF-AGCE01062004.1-trbv |(4599, 4895)|2.56586191169|(0.912,0.920,0.791)|1
--PVEAGVTQNPTHLIKTRGQQVTLRCSPIS-G------HTSVSWYQQALGQGPE---FI
LEYYE-K--K-ERNRGN-FPHRFSGH-QFRDYSSDLN------VS-NLERGDSALYLCAS
SL-----
>V16RF-AGCE01062006.1-trbv |(795, 1091)|2.56586191169|(0.912,0.920,0.791)|1
--PVEAGVTQNPTHLIKTRGQQVTLRCSPIS-G------HTSVSWYQQALGQGPE---FI
LEYYE-K--K-ERNRGN-FPHRFSGH-QFRDYSSDLN------VS-NLERGDSALYLCAS
SL-----
>V17RF-AGCE01062008.1-trbv |(590, 890)|2.96440816598|(0.993,0.991,0.981)|1
--HAGAGVSQDPRHKVTKTGQNVTFRCDPIS-G------HNSLYWYRQTLGQSPE---FL
TYFQN-E--V-QLDKSGLPSDRFFAE-RTKGSFSTLK------IQ-RTEQGDSAMYLCAS
SL-----
>V18RF-AGCE01062008.1-trbv |(6797, 7094)|2.94811631225|(0.986,0.972,0.991)|1
--SVAAGVIQYPRHLIKEKRKTAILKCYPIP-G------HDTVYWYQQGPGQGLQ---FL
ISYYE-K--T-QRDKGS-IPDRFTAQ-QFSDYHSELN------MS-SLELGDSALYLCAS
SL-----
>V19RF-AGCE01062009.1-trbv |(1447, 1744)|2.97989600501|(0.992,0.997,0.991)|1
--HMDGRITQSPRHKVTETGTPVALRCHQTE-N------HRYMYWYRQDLGHGLR---LI
YYSYG-V--K-DISKGE-VPDGYNVS-RSNTEDFPLT------LE-STTGSQTSVYFCAS
SD-----
>V20RF-AGCE01062009.1-trbv |(16503, 16803)|2.96971202074|(0.994,0.988,0.988)|1
--HTDAGVIQSPQHKMTEMGQEVTLRCEPIS-G------HTQLFWYRQTVMRGLE---LL
TYFNN-E--N-LIDDSGMPKDRFSAQ-MPNASFSTLK------IQ-PSEPGDSAVYFCAS
SL-----
>V21RF-AGCE01062009.1-trbv |(38765, 39065)|2.94619216959|(0.983,0.992,0.972)|1
--HTAAGVTQFPSHRVIEKGQAVTLRCDPIS-G------HEYLYWYRRVMGKEIK---FL
IYFLR-D--S-KQDESGMPNHRFSAE-RTGGTNSTLK------VQ-SAELEDSGIYFCAS
SL-----
>V24RF-AGCE01062011.1-trbv |(9642, 9942)|2.34108035373|(0.843,0.700,0.883)|1
--LSNAGVTQNPRHLVRRKGQEARLRCSPVK-G------HNHVYWYQQLLGEGLK---FM
IYLQR-E--S-TIDESGMPKEQFSAE-FPKEGPSVLR------IQ-QAERGDSAAYFCAS
SV-----
>V26RF-AGCE01062012.1-trbv |(11525, 11825)|2.21167837268|(0.909,0.695,0.812)|1
--SLDTKVTQRPRHVVTAKEQKAKMDCVPIK-G------HGYVYWYHKKLEEELK---FL
FYLQN-G--E-IIQKAEEINERFSAQ-CPENSPCALE------IQ-STESGDAGLYFCAS
SK-----
>V29RF-AGCE01062014.1-trbv |(56057, 56354)|2.56199627756|(0.920,0.801,0.898)|1
--LVEVKVTQNPRYLVKRVGEKVFLECAQDM-D------HGRMFWYRQDPGLGLR---LI
YFSYD-I--K-TDEEGD-VPDGYSVS-REKKEQFSLI------LG-SARTNQTSVYLCAS
SS-----
>V31RF-AGCE01134597.1-igkv |(30724, 31039)|2.58169227278|(0.999,0.779,0.981)|1
-STGDIVMTQTPLSLPVTLGEPASISCRSSQSLL-HSNGYTYLNWYLQKPGQSPQ---LL
IYR------V-SNRASG-VPDRFSGSG--SGTDFTLK------IS-RVEAEDVGVYYCMQ
ATQTP--
>V32RF-AGCE01134598.1-igkv |(8615, 8915)|2.41157422447|(0.820,0.906,0.740)|1
-ARCDIQMTQSPSFLSASAGDRVTITCQVSQGI------SNELPWYQQKPGKAPT---LL
IFA------A-TRLQSG-IPSQFSGPG--SGTDFTLN------IS-SLQPDDFATYYCQQ
DYSYP--
>V33RF-AGCE01134599.1-igkv |(6643, 6943)|2.9121361913|(1.000,0.931,1.000)|1
-ARCDIQMTQSPSSLSASVGDRVTITCRASRSI------STELDWYQQKPGKAPV---LL
IYA------A-SSLQTG-VPSRFSGSG--SGTDFTLT------IS-SLQPEDVATYYCQQ
DYSYP--
>V34RF-AGCE01134600.1-igkv |(5149, 5453)|2.34106602974|(0.972,0.676,0.990)|1
-SSGDIVMTQSPLFLPVTPGKPASISCRSSQSLLY-SDGNTYLNWFLQKPGQPPR---RL
IYK------V-STRDSG-VPDRFSGSG--SGTDFTLK------IS-QVEAEDVGVYYCMQ
A------
>V35RF-AGCE01134600.1-igkv |(15938, 16236)|2.95135913276|(0.995,0.970,0.989)|1
----DIVMTQTPLSLSVTPGKPASIVCRSSQSLFDSEDGNTYLNWYLQKPGQSPQ---LL
IYD------A-STHASG-VPDRFSGSG--SGTDFTLK------IS-RVEAEDVGVYYCMQ
A------
>V36RF-AGCE01134600.1-igkv |(26942, 27257)|2.99296000066|(0.999,0.996,0.998)|1
-SSGDIVMTQTPLSLPVTPGEPASISCRSSQSLLHS-DGYTYLDWYLQKPGQSPQ---LL
IYT------V-SNRASG-VPDRFSGSG--SGTDFTLK------IS-RVEAEDVGVYYCMQ
ATQAP--
>V37RF-AGCE01134600.1-igkv |(34924, 35224)|2.9949000027|(0.996,1.000,0.999)|1
-TRCDIQMTQSPSSLSASVGDKVTITCQASQGI------NSWLAWYQQKPGKAPR---LL
IYA------A-SSLQTG-IPSRFSGSG--SGTHYTLT------IS-SLQPDDFATYYCQQ
TYSTP--
>V38RF-AGCE01134600.1-igkv |(45692, 45992)|2.99594800078|(0.997,0.999,1.000)|1
-ARCDIQMTQSPTFLSASVGDRVTITCQASQSI------GSALAWYQQKPGKATR---LL
IYA------A-SSLQSG-VPSRFSGSG--SGTDFTLT------IS-SLQPDDFATYYCQQ
YSSFP--
>V39RF-AGCE01134602.1-igkv |(4964, 5279)|2.979900005|(0.995,0.995,0.990)|1
-SSGDIVMTQTPLSLSVTPGEPASISCRSSQSLLHS-NGNTYLHWFLQKPGQSPQ---RL
IYR------V-SNLASG-IPDRFSGSG--SGTDFTLK------IS-RVEAEDIGVYYCVQ
SIQTP--
>V40RF-AGCE01134603.1-igkv |(27342, 27657)|2.36021417454|(0.989,0.825,0.792)|1
-SSGDTVMTQTPLSLPVTLGEPASISCRSSQSLL-HSNGNTYLHWYLQKPGQSPQ---LL
IYK------V-SNRASG-VSDRFSGSG--SGTDFTLK------IS-RVKAEDIGVYYCMQ
STWFP--
>V41RF-AGCE01134603.1-igkv |(35325, 35640)|2.95972492248|(0.999,0.971,0.993)|1
-SSGDIVMTQTPLSLPVTPGEPASISCRSSQSLL-YSDGKNYLYWYLQKPGQSPQ---LL
IYL------G-SNRASG-VPDRFSGSG--SGTDFTLK------IS-RVEAEDVGVYYCMQ
GIELP--
>V42RF-AGCE01134604.1-igkv |(11428, 11728)|2.98042016586|(0.998,0.997,0.986)|1
-TRCDTQMTQSPSSLSASVGDRVTITCRASQSI------SNWLAWYQQKPGQVPK---LL
IYK------A-STLQSG-VPSRFSGSG--SGTDFTLT------IS-SLQPEDVATYYCQK
CNSAP--
>V43RF-AGCE01134604.1-igkv |(23700, 24015)|2.98783600705|(0.999,0.995,0.994)|1
-SSGDIVMTQTPLSLPVTPGEPASISCRSSQSLLHS-NGNTYLSWYLQKPGQSPQ---LL
IYK------V-SNRASG-VPDRFSGSG--SGTDFTLK------IS-RVEAEDVGVYYCMQ
DTKTP--
>V44RF-AGCE01134604.1-igkv |(38298, 38611)|2.42753953114|(0.930,0.736,0.904)|1
-STGDIVMTQSPLFMPVTLGKPASISCRSSQSLLH-SNGNTYLSWFLQKPGQSPR---RL
IYK------V-STRDSG-VPDRFSGSG--AGTDFTLK------IS-TVEAEDVGVYYCLQ
STRY---
>V46RF-AGCE01134609.1-igkv |(1163, 1478)|2.72481547441|(0.987,0.836,0.989)|1
-SSGDIVMTQTPLTLPVTLGKPASISCRSSQSLL-YSDGKNYLHWYLQKPGQSPQ---LL
IYT------A-SNRFSG-VPDRFSGSG--SGTDFTLK------IS-TVEAEDVGVYYCMQ
AIKHP--
>V47RF-AGCE01134610.1-igkv |(3122, 3422)|2.99398000014|(0.997,0.998,0.999)|1
-TRCDIQMTQSPSSLSASVGDKVTITCQASQGI------SNNLAWYQQKTGKAPR---LL
INE------A-SSLESG-VPSRFSGSG--SGTDFTLT------IS-SLQPEDSATYYCQQ
HNSYP--
>V48RF-AGCE01134612.1-igkv |(802, 1102)|3.0|(1.000,1.000,1.000)|1
-ARCDIQMTQSPSSLSASVGDKVTITCQASQGI------NNYLAWYQQKPGKAPR---LL
IYY------A-SSLDSG-VPSRFSGSG--SGADYTLT------IS-SLQPEDFATYYCQQ
YNSYP--
>V49RF-AGCE01134613.1-igkv |(4841, 5141)|3.0|(1.000,1.000,1.000)|1
-ARCDIQMTQSPSSLSASVGDKVTITCQASQGI------NNYLAWYQQKPGKAPR---LL
IYY------A-SSLQSG-VPSRFSGSG--SGADYTLT------IS-SLQPEDFATYYCQQ
YSSYP--
>V50RF-AGCE01134614.1-igkv |(11222, 11522)|2.99696400065|(1.000,0.997,1.000)|1
-ARCDIQMTQSPSSLSASVGDKVTITCQASQGI------SKWLAWHQQKPGKAPK---LL
IYE------A-SKLQSG-VPSRFSGSG--SGTDFTLT------IS-SLQPEDFATYYCQQ
YNSNP--
>V51RF-AGCE01134616.1-igkv |(2365, 2665)|2.99396800026|(0.998,1.000,0.996)|1
-STGQIVMTQSPATLSLSPKETATLSCRASQSV------SSYLAWYQQKPGQAPR---LL
IYG------A-STRATG-IPDRFSGSG--SGTEFTLT------IS-SLEPEDFAVYYCQQ
YNNRP--
>V53RF-AGCE01134616.1-igkv |(27065, 27365)|3.0|(1.000,1.000,1.000)|1
-ARCDIQMTQSPSSLSASVGDTVTITCQASQGI------SKWLAWYQQKPGKAPK---LL
IYD------A-SKLQSG-VPSRFSGSG--SGTDFTLT------IS-SLQPEDFATYYCQQ
HNSNP--
>V54RF-AGCE01134617.1-igkv |(5600, 5900)|2.94508252471|(0.990,0.999,0.960)|1
-TSGQIVMTQSPATLSLSPKETATLSCRASQSV------SSYLAWYQQKPGQGPR---LL
IYG------A-STRATG-IPARFSGSG--SGTEFTLT------IS-SLEPEDFAVYYCKQ
YNNWP--
>V56RF-AGCE01147749.1-ighv |(15994, 16303)|2.99389600501|(1.000,0.999,0.995)|1
-VHSQVQLVQS-GAEVKKPGASMKVSCKASGYTF--T--DYYMNWVRQAPGKGLE---WM
GDIDPEN--G-ETSYAQKFQGRVTMTADTSTSTAYME------LR-SLRSEDTAVYYCAR
-------
>V57RF-AGCE01147750.1-ighv |(13331, 13640)|2.93698468178|(0.991,0.999,0.953)|1
-VQCEVQLVES-GGGLVQSGWSLRLSCVASGSTF--S--DYYMHWVCQAPGKGLE---WI
GQINPN--GR-STYFTDFVKGRFTISRDNAKNSLYLQ------MN-NLKTEDTAVYYCAG
-------
>V58RF-AGCE01147864.1-ighv |(2102, 2409)|2.20042359171|(0.964,0.975,0.627)|1
-VCAEVQLVQS-GAEVKRPGESLKISCKASGYSF--N--SYWISWVRQMPGKGLE---WM
GIIYPGN--S-DTRYSPSFQGHVTISADKSTSTAYLQ------WS-SLKASDAAMYYCA-
-------
>V59RF-AGCE01147864.1-ighv |(20911, 21220)|3.0|(1.000,1.000,1.000)|1
-VQCEVQLVES-GGGLVQPGGSLRLSCAASGFTF--S--SYWMSWVRQAPGKGLE---WV
SAINT--DGS-STYYADAVKGRFTISRDNAKNSLYLQ------MN-SLRAADTAVYYCAR
-------
>V61RF-AGCE01147865.1-ighv |(20279, 20594)|2.62887090521|(0.981,0.969,0.801)|1
-VQCEVQLVES-GGGLVQPGGSLRLSCAASVFTF--S--DYHMSWVRQAPGKGLE---WV
GLIRNKANGG-TAEYAESVKDRFTISRDDSENSLYLQ------MS-SLKPEDTAVYYCTR
-------
>V62RF-AGCE01147866.1-ighv |(3708, 4017)|2.7898502378|(0.924,0.921,0.947)|1
-AHSQGQLVQS-GAEVKKPGASVKVSCKASGYSF--T--SYVISWVRQNPRQGLE---WM
GGIYPGN--G-GTNYAQKFQGRVTMTTDKSTSTAYME------LS-SLRSEDMAMYYCAG
-------
>V64RF-AGCE01147870.1-ighv |(13126, 13438)|2.68881517647|(0.880,0.866,0.996)|1
-VQCDVQLAES-GGGLVQPGGSLRLSCAASRFTF--S--SYDMDWVCQAPGKGLQ---WV
SAVSA--GGS-NTYYADSVKGRFTISRDNGKKFLYLQ------MN-SLRAEDTAVYYCAK
K------
>V65RF-AGCE01147874.1-ighv |(2400, 2706)|2.99899600001|(1.000,1.000,0.999)|1
-VQCEVQLVES-GGGLAKPGGSLRLSCAASGFTF--S--SYAMSWVRQAPGKALE---WV
SAIGT--GG--STYYADAVKGRFTISRDNAKNSLFLQ------MN-SLRAEDTAVYYCAR
-------
>V66RF-AGCE01147875.1-ighv |(4611, 4920)|2.47793515627|(0.791,0.994,0.986)|1
-VQCEVQLVES-GGGLVQPRGSLRLSCAASGFTF--S--SYAMSWVRQAPGKGLE---WV
SAISTD--GS-GTSYADSVKGRFTISRDNAKNSLYLQ------MN-SLRAEDTAVYHCER
-------
>V67RF-AGCE01147944.1-ighv |(862, 1171)|2.99798400013|(1.000,0.998,1.000)|1
-VQCEVQLVES-GGGLAKPGGSLRLSCAASGFTF--S--SYYMDWVRQAPGKALE---WV
SAISTDG--S-GTSYADSVKGRFTISRDNAKNSLYLQ------MS-SLRAEDTAVYYCAT
-------
>V70RF-AGCE01148057.1-ighv |(4263, 4572)|2.99593600205|(1.000,0.996,1.000)|1
-VQCEVQLVES-GGGLAKPGGSLRLSCAASGFVF--S--SYHMHWVRQAPGKGLE---WV
SFISSDG--G-STYYADSVKGRFTISRDNAKNSLYLQ------MS-SLRAEDTAVYYCAR
-------
>V71RF-AGCE01148067.1-ighv |(2196, 2505)|2.98297652411|(1.000,1.000,0.984)|1
-VQSQVQLVQS-GAEVKKPGASVKVSCKASGYTF--T--SYYMNWVRQAPGQGLE---WM
GWINPYN--G-NTGYAQKFQGRVTMTVDKSTSTAYME------LS-SLRSEDTAVYYCAK
-------
>V74RF-AGCE01026519.1-trav |(24104, 24394)|2.20521382335|(0.708,0.800,0.733)|-1
-GTNSNSVKQ-TDQVIISEGASVTMNCTYTAMG------YPTLFWYVQYPNKPLQ---FL
QEETMEN--S-K-----NF-----GARNIKDKNSPIA------KH-SVQVSDSAMYYCLL
RDTVLR-
>V77RF-AGCE01026520.1-trdv |(67373, 67673)|2.89860549808|(0.995,0.989,0.931)|-1
-SSMAQTVTQSQPEMSVQEAETVTLNCTYDTSN-----SNYYLFWYKQPPSRQMI---LI
IRQEGFK--Q-Q----NATENRFSVNFQKAAKSFSLK------IS-DSQLGDTAMYFCAY
R------
>V78RF-AGCE01026520.1-trdv |(76513, 76813)|2.92849766228|(0.985,0.956,0.991)|-1
-FSIAQRVTQSESEMSVQEAETVTLNCTYDSSD-----SDYYLFWYKQPPSRHMI---LI
IRQEAYK--Q-Q----NATENRFSVNFQKAAKSFSLK------IS-DSQLGDTAMYFCAY
R------
>V80RF-AGCE01026522.1-trav |(3924, 4211)|2.53838866514|(0.937,0.951,0.764)|-1
-LSGEDQVTQSPEALRLQEGDSSSLNCSYTVGN------FGGLLWYRQDPGKGPE---FL
FILYSAG--E-EK-----QKERLKATLTKK--ESFLR------IT-APKPEDSATYLCAV
Q------
>V81RF-AGCE01026522.1-trav |(15303, 15602)|2.9415016842|(0.983,0.963,0.998)|-1
-VSSKQEVTQIPAALSVPEGESLVFNCSFTDSA------IYYLQWFRQDPGKGLT---SL
LLIQSSQ--R-EQ-----TSGRLNASLDKSSRYSTLH------IA-ASQPGDSATYLCAV
RHS----
>V82RF-AGCE01026522.1-trav |(67327, 67617)|2.54296739792|(0.857,0.864,0.826)|-1
--TIIDAKTTQPTSMDCAEGRAANLPCNHSTIS-----GNEYIHWYRQSYSQEPQ---YV
IHGLKNN--E--------TNEMASLIIAEDRKSSILI------LP-HATLRDTAVYYCIV
RV-----
>V84RF-AGCE01026527.1-trav |(1820, 2116)|2.94226014987|(0.980,0.991,0.972)|-1
--VNSQQGEEEPQTLSIQEGENAIINCSYKTS-------ITSLQWYRQDSNRGLT---QL
ILIRSNE--R-EK-----HSGRLRFMLDTSMKSSSLF------IA-AAQAADTAAYFCAT
EAQC---
>V85RF-AGCE01026527.1-trav |(7054, 7345)|2.97097652411|(0.996,0.996,0.980)|-1
-RTYGDSVTQTEGPVTLPEGAALTLNCTYQSSY------SVFLFWYVQYLDKEPQ---LL
LKSS-EN--Q--E--T--DSRGFQASHVKSDSSFRLE------KP-SVQLSDSAVYYCAL
R------
>V86RF-AGCE01026527.1-trdv |(10273, 10576)|2.97858408012|(0.989,0.999,0.991)|-1
-SSMAQKVTQAQTEISVVEKEDVTLDCVYETSD-----TTYYLYWYKQPSAREMI---FL
IRQNSFN--E-Q----NEISGRYSGNFQKSTSSFSLT------IA-ASQVIDSAVYFCAL
SE-----
>V87RF-AGCE01026529.1-trav |(3178, 3469)|2.95806587284|(0.994,0.972,0.994)|-1
VWSQQKEVEQNPGSLSVPEGAIASLSCTYSNRA------FQYFMWYRQYSRKGPE---LL
TFIYSSD--K-K------EDGRFTAQLNKSSQYISLF------IR-DSQPSDSATYLCAM
-------
>V89RF-AGCE01026530.1-trav |(8602, 8899)|2.96351211712|(0.992,0.991,0.981)|-1
-DARAQSVTQPDIHITVSEGASLELRCNYSYGA------TPYLFWYVQSPGQGLQ---LL
LRYFSGD--T-LV--Q--GIKGFEAEFKRSQSSFNLR------KP-SVHWSDAAEYFCAV
S------
>V90RF-AGCE01026530.1-trav |(21106, 21396)|2.93200449196|(0.964,0.982,0.990)|-1
--VNGENVEQHPSTLSVQVGDSSVINCTYSDSA------SNYFPWYKQELGKGPR---LI
IDIRSNV--D-KR-----KDGRMTVLLNKAAKHFSLH------IT-DTQPGDSALYFCAA
G------
>V91RF-AGCE01026530.1-trav |(40762, 41065)|2.97578801933|(0.995,0.988,0.993)|-1
VWS-QQKVEQNSGPLNVPEGVIASLNCTYSDRG------SQSFYWYRQYPGKSPE---LL
MSVYSSG----N------EDGRFTAQLNRASQYVSLL------IR-DSQLSDSATYLCAV
STRCSP-
>V93RF-AGCE01026531.1-trav |(478, 766)|2.98480001921|(0.993,0.992,1.000)|-1
VWSQQKEVEQDPGPFNVPEGTTVAFNCTYSNSA------SQYFFWYRQDPRKGPK---LL
MSVYSSG----N------EDGRFTAQLNRASQYVSLL------IR-DSQLSDSATYLCAV
-------
>V95RF-AGCE01026534.1-trav |(23755, 24045)|2.9834040992|(0.989,0.999,0.996)|-1
-MSSGEDVEQSR-FLSVQEGDSVVMNCTYTDSS------SSYLYWYKQEPGASLQ---LL
AYILSNT--D-MK-----QDQRLTVQLDKKNKHLSLH------VA-EAQTGDSAIYFCAE
S------
>V96RF-AGCE01026534.1-trav |(44840, 45134)|2.91252655653|(0.948,0.992,0.986)|-1
-GISGDSVVQTEGEVLLSEGDSLTVNCSYESTG------YPSLFWYVQYPGKGPE---LL
LKATKGN--D--K--G--SNKDFEAIYRTETTSFHLE------KG-SVRESDSAVYFCAL
S------
>V100RF-AGCE01112648.1-iglv |(492, 795)|2.98594800078|(0.997,0.995,0.994)|-1
-FVTSYELTQP-HSVSVAPGQTARITCGGNN--I---GG-KYTYWYQQKSGQSPV---LV
IYR------D-NNRPSG-IPERFSGSN--SGNTATLT------IS-GVQAGDEADYYCQV
WDSSSNH
>V101RF-AGCE01112648.1-iglv |(8719, 9022)|2.98974003277|(0.999,0.991,1.000)|-1
-SVVSSAMTQE-PAVSVALGQTARITCQGGG--I---GT-YSANWYQQKPGQAPV---LV
IYD------N-NNRPSG-IPDRFSGSS--SGNTASLT------IT-GAQVEDEADYYCGS
WDSSGTH
>V102RF-AGCE01112652.1-iglv |(287, 590)|2.54425337589|(0.964,0.760,0.974)|-1
-SATSYELTQP-HSVSVAPGQTARITCGGNN--I---GR-KNVHWYQQKSGQAPV---LV
IYN------D-NNRPSG-IPERFSGSN--SGNTATLT------IS-GVQAGDEADYYCQV
WDSSTDH
>V103RF-AGCE01112674.1-iglv |(4938, 5247)|2.96549264122|(0.998,0.982,0.987)|-1
-SWAQSVLTQP-PSASGAPGQRVTISCSGSSSNI---G-NNYANWYQQLPGKAPK---LL
IYG------N-SNRPSG-SPDRFSGSK--SDTSATLA------IT-GLQSADEADYYCET
WDSSLNA
>V106RF-AGCE01134619.1-igkv |(32675, 32987)|2.96232022844|(0.983,0.984,0.996)|-1
-TYGDIVMTQSPGSLAVSLGERVTINCKSSQSLL--SSSKNYLAWHQQKPGQAPK---QI
IVW------A-STRVSG-VPDRYSGSG--SGTDFTLT------IS-SLQAEDVAVYYCQQ
FYSAP--
>V107RF-AGCE01134619.1-igkv |(44281, 44572)|2.28678929256|(0.724,0.862,0.793)|-1
----NTVLTQSPALLSASLRDTIFMSCSANQSIS------DYLTWYQQKPGQPPK---IL
VYD------A-DNLYSG-VSSRFSGIQ--SGTNFILT------IS-SVEADDAATYYCQQ
DYAIP--
>V108RF-AGCE01134619.1-igkv |(59305, 59593)|2.36097750543|(0.807,0.737,0.841)|-1
-----TTLTQSPTLVSVTPGDKVTISCKASQD------IDNDIYWYQQKPGEAPI---FI
IQE------A-TTLVSG-IPPRFSGSG--YGTDFTLT------IN-NIELEDAAYYFCQQ
DDNFP--
>V109RF-AGCE01135277.1-iglv |(31, 340)|2.98174003277|(0.991,0.999,0.992)|-1
-CWAQSVLTQP-PSVSGNPGQRVTISCSGSSSNI---G-SSYVNWYQQLPGTAPK---LL
IYD------S-NQRPSG-VSDQFSGST--SGNSASLT------IT-GLQSADEADYYCQS
YDSNLKA
>V111RF-AGCE01147916.1-ighv |(5261, 5570)|2.53625941136|(0.936,0.913,0.781)|-1
-AHSQMQLVQS-EAEVKKPGASVKVSCKASGYTF--T--YHYMHWVRQAPGQGLE---WM
GWIMPYN--G-NTNYAQKVEGRVTITRDTSMSTIYME------LR-SLRSEDTAVYYCAR
-------
>V112RF-AGCE01147919.1-ighv |(4216, 4525)|2.99899600001|(1.000,1.000,0.999)|-1
-AHSQVQLVQS-GAEVKKPGASVKISCKASGYTF--T--SYSMHWVQQAPGQGLE---WI
GYINTNT--G-GTNYAQKFQGRVTMTRDTSTSTAYME------LS-SLKSEDTAVYYCAR
-------
>V113RF-AGCE01147923.1-ighv |(7327, 7634)|2.99496800026|(0.997,0.999,0.999)|-1
-VLSQVQLQES-GPGLVKPSDTLSLTCAVSGYSI--SSG-YWWSWIRQPPGKALE---WI
GSIYY-S--G-SAYYNPSLKSRVTISTDMSKNQFSLR------MS-SVTAADTAVYYCA-
-------
>V114RF-AGCE01147939.1-iglv |(7498, 7807)|2.95260484445|(0.989,0.994,0.971)|-1
-VDSETVVTQE-PSYLVSPGGTVTLTCGLSSGSV---STSHYPSWYQQTPGQAPQ---ML
IYS------T-NTRPSG-VPDRFSGSI--LGNKAALT------IK-GAQADDETDYYCML
YMGSGI-
>V115RF-AGCE01148076.1-ighv |(262, 572)|2.60151093654|(0.825,0.968,0.931)|-1
LSKVQVQLQQW-GPGLVKPSETLSLTCAVYGYFI--SS-DYWWSWIRQPPGKGLE---WI
GRISYI---G-STYYNPSLKSRVTLSTDTSKSQFSLR------LS-SVTTADTVVYYCA-
-------
>V116RF-AGCE01148081.1-ighv |(431, 740)|2.60654506828|(0.992,0.792,0.972)|-1
-VQSQVQLVQS-GAEVKKPGASVKVSCKTSGYTF--T--NYYMYWVRQAPGQGLE---WM
GWIYPGN--G-NTKYAQNFQGRVTMTADKSTSTAYME------LS-SLRSEDTTVYYCAR
-------
>V117RF-AGCE01148188.1-ighv |(110, 419)|2.99080001921|(0.999,0.992,1.000)|-1
-VQCEVQLVES-GGGLAKPGGSLRLSCAASGFTF--S--DYWMGWVRQAPWKGLE---WV
GEINHN--GG-STYYADSVKGRFTISRDNAKNSLYLQ------MN-SLRAEDTAVYYCAR
-------
>V118RF-AGCE01148199.1-ighv |(2012, 2325)|2.99288400513|(1.000,0.998,0.995)|-1
-VQCEVQLVES-GGGLAQPGGSLRLSCAASGFTF--S--NYWMNWVCQAPGKGLE---WV
GRIKSKADGG-TAEYTASVKGRFTISRDDSKNMLYLQ------MR-SLKTEDTAVYYCA-
-------
>V120RF-AGCE01148386.1-ighv |(210, 517)|2.99899600001|(1.000,1.000,0.999)|-1
-VQCEVQLVES-GGGLVKPGGSLRLSCAASGFTL--S--EYGMHWVRQAPGKGLE---WV
SFISYN--GG-YIHYADSVKGRFTISRDNAKNSLYLQ------MS-SLRAEDTAVYYCA-
-------
>V0RF-ADFV01062069.1-trbv |(9529, 9829)|2.5327411848|(0.941,0.859,0.818)|1
--LTEPEVTQTPSHQVTQMGQEVILRCVPIS-N------HLYFYWYRQILGQKFE---FL
VSFYS-D--K-VSDKSEIFDEQFSVE-RPDGSNFTLK------IR-STKLEDSAMYFCAS
SE-----
>V1RF-ADFV01062069.1-trbv |(21787, 22100)|2.9136312831|(0.988,0.988,0.945)|1
--PIDTEVTQTPKHLVMGISNKKSLKCEQHM-G------HRAMYWYKQKAKKPPE---LM
FVYSY-E--K-LSIN-ESVPSRFSPE-CPKSSLLNLH------LH-ALQPEDSALYLCAS
SQDTALQ
>V4RF-ADFV01062069.1-trbv |(42333, 42630)|2.98580001921|(0.998,0.997,0.991)|1
--SLDTAVSQTPKYLVTQMGNDKSLKCEQNL-G------HDTMYWYKQDSKKFLK---IM
FSYRN-K--E-PILN-ETVPNRFSPD-SPDKAHLNLH------IK-SLELGDSAVYFCAS
SQ-----
>V5RF-ADFV01062069.1-trbv |(46363, 46676)|2.9540773318|(0.995,0.975,0.986)|1
--PIDTEVTQTPKHLVMGMTNKKSLECEQHM-G------HNAMYWYKQKAKKPPE---LM
FVYNY-E--K-LSIN-ESVPSRFSPE-CPKSSLLNLH------LH-ALQPEDSALYLCAS
SQDTALQ
>V6RF-ADFV01062069.1-trbv |(54249, 54545)|2.95977645736|(0.989,0.974,0.998)|1
--PVEAGVTQTPRYLIKTRGQQVTLSCSPIS-G------HQSVFWYQQTPGQGLQ---FL
FEYFS-E--T-QREKGN-FPDRFSGR-QFSNSRSEMN------VS-TLELGDSALYLCAS
SL-----
>V7RF-ADFV01062069.1-trbv |(61551, 61848)|3.0|(1.000,1.000,1.000)|1
--PVNAGVTQTPKFQVLKTGQSMTLQCAQDM-N------HNSMYWYRQDPGMGLR---LI
HYSVG-E--G-TTDKGE-VPDGYNVS-RLNTQDFSLR------LE-SAAPSQTSVYFCAS
SE-----
>V8RF-ADFV01062071.1-trbv |(8280, 8577)|2.99696400065|(1.000,1.000,0.997)|1
--PVNAGVTQTPKFQVLKTGQSMTLQCAQDM-N------HNSMYWYRQDPGMGLR---LI
HYSAV-E--G-ITDKGE-VSDGYNVS-RLNKQNLLLR------LV-SAAPSQTSVYFCAS
SE-----
>V9RF-ADFV01062071.1-trbv |(16301, 16614)|2.96102906788|(0.998,0.980,0.985)|1
--PLDTAVLQTPKYLVTQTGKKESLKCEQNL-G------HNAMYWYKQDSKKFLK---IM
FSYSN-K--E-PILN-ETVPNRFSPE-SPDKSHLNLH------IS-SLELGDSAVYFCAS
SQDTALQ
>V10RF-ADFV01062071.1-trbv |(19707, 20020)|2.59882742436|(0.974,0.926,0.810)|1
--PMETGVTQTPRHLVMGMTNKKSLKCEQDL-G------HNAMYWYKQSAEKPLQ---LM
FVYNL-K--E-QIEN-NSVPSRFSPE-CPNSSHLFLH------LH-ALQPEDSVLYLCAS
SQDTALQ
>V11RF-ADFV01062071.1-trbv |(27836, 28133)|2.99899600001|(1.000,1.000,0.999)|1
--PVNAGVTQTPKFQVLKTGQSMTLQCAQDM-N------HNYMYWYRQDPGMGLR---LI
HYSTG-E--G-TTDKGE-VSDGYDVS-RSNTQNFLLR------LE-SAAPSQTSVYFCAS
SE-----
>V13RF-ADFV01062075.1-trbv |(644, 934)|2.68014518058|(0.983,0.824,0.970)|1
----DSGVTQTPKHLITAIGQRVTLRCSPRS-G------DLSVYWYQQSLDQGLQ---FL
IQYYN-G--E-ERERGN-ILERFSAQ-QFPDLHSELN------LS-SLELGDSALYFCAS
SI-----
>V14RF-ADFV01062075.1-trbv |(8445, 8742)|2.2194691592|(0.901,0.629,0.959)|1
--HRDAEITQSPRYKITETGRQVTLKCHQTW-N------HNNMFWYRQDLGHGLR---LI
HYSFG-V--P-DTGKGE-VSDGYSVS-RSKTEDFPLT------LE-SAASSQTSVYFCAS
SE-----
>V15RF-ADFV01062075.1-trbv |(33395, 33695)|2.99798400013|(1.000,1.000,0.998)|1
--HTGAGVSQSPRYKVTKKGQDVALRCDPIS-G------HVSLYWYRQTLRQGPE---FL
TYFNY-E--A-QQDKSGLLSGRFSAE-RPEGSVSTLK------IQ-RTEQGDTAVYLCAS
SL-----
>V16RF-ADFV01062075.1-trbv |(40699, 40989)|2.97799200002|(0.992,0.993,0.993)|1
----ETGVTQSPTHLIKTRGQQVTLRCSPMS-G------HTSVYWYQQVLGQGLQ---FL
LWYNE-E--A-ERERGN-FPRRFSGR-QFPNYSSELN------VN-ASLLEDSALYLCAS
SL-----
>V17RF-ADFV01062075.1-trbv |(60057, 60353)|2.98660004313|(0.991,0.997,0.999)|1
--SVETGVTQSPTHLIKTRGQQVTLRCSPQS-G------HNTVSWYQQTLGQGPQ---FI
VQYYR-E--E-ENGRGN-FPPRFSGR-QFPDYSSELN------VN-ASLLEDSALYLCAS
SL-----
>V18RF-ADFV01062075.1-trbv |(69334, 69634)|2.9505766041|(0.986,0.996,0.970)|1
--HADTGVSQDPRHKITKRGRNVTFRCDPIS-E------HNSLYWYQRTLGQGPE---FL
TDFQN-E--A-QLDKSGLLSDHFSAE-RPKGSFSTLK------IQ-RTEQGDSAMYLCAS
SL-----
>V19RF-ADFV01062075.1-trbv |(75853, 76150)|2.60493208044|(0.971,0.806,0.936)|1
--SVAAGVIQSPRHLVKEKRETATLKCYPIP-G------HDTVYWYQQGPGQGPQ---FL
ISFYE-K--M-QNDKGS-IPDRFSAQ-QFSDYHSELN------MS-SLELGDSALYLCAS
SL-----
>V20RF-ADFV01062075.1-trbv |(83965, 84262)|2.96413755993|(0.994,0.999,0.973)|1
--HMDAGITQSPRHKVTETGTPVTLRCHQTE-N------HCYMYWYRQDLGHGLR---LI
HYSYG-V--K-DTDKGE-VSDGYSVS-RSNTEDFLLT------LG-SATHSQTSVYFCAI
SE-----
>V21RF-ADFV01062075.1-trbv |(95774, 96074)|2.99294800078|(0.998,0.995,1.000)|1
--LIEAGVVQSPRYKIIEKKQPVAFWCNPIS-G------HNTLYWYRQNLGQGPE---LL
IRYEN-E--E-AVDDSQLPKDRFSAE-RLKGVDSTLK------IQ-PAELGDSAVYLCAS
SL-----
>V22RF-ADFV01062076.1-trbv |(7831, 8127)|2.99193200206|(0.999,0.998,0.995)|1
--PVDAGVTQSPTHLIKMRGQQVTLRCSPIS-G------HTSVYWYQQALGQGPQ---FI
IQYYE-E--E-ERGRGN-FPDRFSAR-QFPNYSSELN------VN-ALLLGDSALYLCAS
SL-----
>V24RF-ADFV01062079.1-trbv |(3580, 3877)|2.49067786389|(0.950,0.910,0.765)|1
--HGDGMVIQNPRYQVTQLGKPVTLSCSQNL-N------HNVMYWYQQKSSQAPK---LL
FHYYD-K--D-FNNE-ADTPDNFQSR-RPNTSFCFLD------IR-SPGLGDAAVYLCAT
SR-----
>V25RF-ADFV01062079.1-trbv |(8562, 8862)|2.98196400065|(0.993,0.996,0.993)|1
--SPGEEVTQTPKHLVKGEGQKAKLYCAPIK-G------HSYVFWYQQVLKKEFK---FL
ISFQN-E--N-IFDETGMPKERFSAK-CLLNSPRSLE------IQ-ATKLKDSAVYFCAS
SQ-----
>V26RF-ADFV01062081.1-trbv |(16583, 16883)|2.5513715962|(0.961,0.801,0.901)|1
--SMDTKVTQRPRLLVKANEQKAKMDCVPIK-G------HSYVYWYRKKLEEELK---FL
VYLQN-E--E-IIQKAEIINERFSAQ-CPKNSSCTLE------IQ-STESGDTALYFCAS
SK-----
>V28RF-ADFV01062082.1-trbv |(9024, 9321)|2.99185201038|(0.999,0.993,1.000)|1
--LMEADIYQTPRYLVIRTGKKITLECSQTM-G------HDKMYWYQQDPGMELH---LI
HYSYG-V--N-STEKGD-LSSESTVS-RIRTEHFPLT------LE-SARPSHTSQYLCAS
SE-----
>V29RF-ADFV01062084.1-trbv |(20830, 21127)|2.9803601679|(0.999,0.987,0.995)|1
--LLEAQVTQNPRYLITVTGKKLTVTCSQNM-N------HEYMSWYRQDPGLGLR---QI
YYSIN-V--E-AVDKGD-VPEGYNVS-RKEKRNFPLI------LE-SPSPNQTSLYFCAS
SL-----
>V30RF-ADFV01062084.1-trbv |(25535, 25832)|2.98774003277|(0.999,0.991,0.998)|1
--LVDVKVTQSSRYLVKRMGEKVFLECVQDM-D------HERMFWYRQDPGLGLR---LI
YFSYD-V--Q-MKEKGD-IPEGYSVS-REKKEHFSLI------LE-SASTNQTSMYLCAS
SL-----
>V31RF-ADFV01062085.1-trbv |(301, 604)|2.47578719564|(0.906,0.900,0.756)|1
-SVFSAVVSQKPSRDICQRGTSLTIQCQVNS-Q------VTMMFWYRQQPGQSLT---MI
ATANQGS--E-ATYESGFVIDKFPIS-CPNLSFSTLT------VS-NMSPEDSSIYLCSV
E------
>V32RF-ADFV01106193.1-igkv |(6403, 6701)|2.55021331374|(0.814,0.874,0.975)|1
-SRGEIVLTQSPAFLSVTPKEKVTITCRASQS------IGSSLHWYQQKPDQSPK---LL
VKY------A-SQSISG-VPSRFSGSG--SGTDFTLT------IN-SLEAEDVATYHCQQ
SSSL---
>V33RF-ADFV01106193.1-igkv |(26068, 26361)|2.99599600001|(0.999,0.998,0.999)|1
-TTREIVLTQSPATLSLSPGEKATLSCRASQSV------GSNLAWYQQKPGQAPR---LL
IYG------A-TNRATG-IPDRFSGSG--SGTDFTLT------IS-SLEPEDFAVYYCQK
YGS----
>V34RF-ADFV01106193.1-igkv |(39460, 39760)|2.26902774875|(0.965,1.000,0.645)|1
-VRCDIQMTQSPSSLSASVGDRVTITCRASQSI------SNDLTWYQQKPGKAPT---LL
IYD------A-TNLHTG-VPSRFSGGG--SGADYSLT------IS-SLQLEDFATYYCQQ
EYSYP--
>V36RF-ADFV01106193.1-igkv |(68380, 68680)|2.99899600001|(1.000,1.000,0.999)|1
-SRCDIQMTQSPSSLSASVGDRVTITCRASQGI------SNYLNWYQQKPGKAPK---LL
IYD------A-SSLQSG-VPSRFSGSG--SGTEFTLT------IS-SLQPEDFAAYYCQQ
YKSYP--
>V37RF-ADFV01106193.1-igkv |(80547, 80847)|2.99598400013|(0.998,0.998,1.000)|1
-TTGEIVLTQSPATLSLSTRERATISCTASQSV------SSYLAWYQQKPGQAPR---LL
IYY------A-SSRATG-IPDRFSGSG--SGTDFTLT------IS-SLEPEDFAVYYCQQ
YKSFS--
>V38RF-ADFV01106195.1-igkv |(6885, 7185)|2.99899600001|(1.000,0.999,1.000)|1
-SRCDIQMTQSPSSLSASVGDRVTITCRASQGI------SSYLAWYQQKPGKAPE---LL
IYA------A-STLQSG-VPSRFSGSG--SGTEFTLT------IS-SLQPEDFATYYCQQ
YNSYP--
>V39RF-ADFV01106195.1-igkv |(45397, 45697)|3.0|(1.000,1.000,1.000)|1
-ARCDIQMTQSPSSLSASVGDRVTITCRASQGI------SKWLAWYQQKPGKAPK---PL
IYD------A-SSLQSG-VPSRFSGSG--SGTEFTLT------IS-SLQPEDFATYYCQQ
YNSYP--
>V40RF-ADFV01106195.1-igkv |(64645, 64945)|2.99899600001|(1.000,0.999,1.000)|1
-ARCDIQMTQSPTSLSASVGDRVTITCRASQGI------SSWLAWYQQKPGKAPK---LL
IYK------A-SSLESG-VPSRFSGSG--SGTEFTLT------IS-SLQPEDFATYYCQQ
YNSDP--
>V42RF-ADFV01126738.1-iglv |(7858, 8168)|2.96602424945|(1.000,0.973,0.996)|1
-SLSQSVVTQP-ASLSASPGASARLTCTLRSGIN---VGSYRISWYQQKPGSPPQ---YL
LNYYSDS--D-KGQGSG-VPSRFSGSKDASTNAGISL------IS-GLQSEDEADYYCMI
-------
>V43RF-ADFV01126738.1-iglv |(12674, 12983)|2.99899600001|(1.000,1.000,0.999)|1
-SWAQSVLTQP-SSVSGTPGQRVTISCSGSSSNI---G-SNNVYWYQQLPGTAPK---LL
IYD------N-NQRPSG-VPDRFSGSK--SGTSASLA------IS-GLQTEDEADYYCEA
WDDSLSG
>V45RF-ADFV01126741.1-iglv |(7037, 7346)|2.63670067828|(0.887,0.881,0.870)|1
-SWAQSALTQP-PSVSAAPGQKVTISCSGSRSDI---G-NYAVSWYQQLPGTAPK---LL
IYE------N-NKRPSG-ISDRFSGSK--SGTSASLG------VT-GLQTGDEANYYCLA
WDSSLSA
>V46RF-ADFV01126741.1-iglv |(12573, 12885)|2.5266218921|(0.993,0.750,0.994)|1
-SWAQSVLTQP-PSVSGSPGQRVTIFCTGSSSNI---GEGYYVHWYQQLPGTAPK---LL
IYE------N-NKRPSG-ISDRFSGSK--SGTSASLA------IA-GLQTGDEADYYCQS
YDSSLSA
>V47RF-ADFV01126742.1-iglv |(25243, 25552)|2.98230822856|(0.998,1.000,0.985)|1
-SWAQSVLTQP-PSVSGTPGQRVTISCSGSSSNI---G-SNNVYWYQQLPGTAPK---LL
IYY------N-NQRPSG-VPDRFSGSK--SGTLASLA------IT-GLRSEDEADYYCEA
WDDSLSG
>V48RF-ADFV01126755.1-iglv |(18501, 18804)|2.60107019773|(0.937,0.781,0.985)|1
-SVASYELAQP-SSVSVSPGQTARITCSGDV--L---AK-KYAQWFQQKTGQSPV---LL
IYK------D-SERPSG-IPERFSGSS--SGTTVTLT------IS-GAQAEDEADYYCQS
ADSSGNH
>V49RF-ADFV01126756.1-iglv |(8462, 8772)|2.99294800078|(0.998,0.995,1.000)|1
-SWAQSALTQP-RSVSGSPGQSVTISCTGTSSDV---GGYNYVSWYQQHPGTAPK---LM
IYD------V-SKRPSG-VSDRFSGSK--SGNTASLT------IS-GLQAEDEADYYCCS
YASDDT-
>V50RF-ADFV01126759.1-iglv |(52, 349)|2.59933001049|(0.897,0.844,0.872)|1
-SVASYELIQP-PSVSVSPGQTARITCSGDV--L---GE-NYADWYQQKPGQAPV---LV
IYK------D-SERPPG-IPERFSGCT--SGNTATLT------IS-RVLTEEEADYYCLS
GDEDN--
>V51RF-ADFV01126759.1-iglv |(7253, 7556)|2.99698000014|(1.000,0.998,0.999)|1
-SATSYELTQP-PSVSVAPGQTAKITCGGNN--I---GS-KNVYWYQQKPGQAPV---LV
IYR------D-SNRPSG-IPERFSGSN--SGNTATLT------IS-AVEAGDEADYYCQV
WDSTSDH
>V53RF-ADFV01126760.1-iglv |(18689, 18992)|2.99192000218|(0.998,0.994,1.000)|1
-SVASYELTQP-PSVSVSPGQTAKITCSGDA--L---PK-KYAYWYQQKSGQTPV---LI
IYE------D-SKRPSG-IPERFSGSS--SGTMATLT------IS-GTQVEDEADYYCYS
ADSSGNH
>V56RF-ADFV01136793.1-ighv |(1288, 1597)|2.34837485352|(0.831,0.799,0.749)|1
-AHSKVQLVQS-GTEVKKPGASVKVSCQDSGYTL--T--DYSKHWVRQTPGKGLQ---WM
GGFDPVD--G-ETVNSQKFQRRVTMTEDTSTDTAYME------LS-SLRSEDTAVYYCAT
-------
>V57RF-ADFV01136793.1-ighv |(10260, 10566)|3.0|(1.000,1.000,1.000)|1
-VQCEVQLVES-GGGLVQPGGSLRLSCVASGFTF--S--SYDMSWVRQAPGKGLE---WV
SYISSG---G-STYYPDSVKGRFTISRDNAKNTLYLQ------MN-SLRAEDTAVYYCAK
-------
>V58RF-ADFV01138112.1-igkv |(5360, 5660)|3.0|(1.000,1.000,1.000)|1
-ARCDIQMTQSPSSLSASVGDKVTITCRASQGI------SNDLNWYQQKPGKAPK---LL
IYY------A-SSLQSG-IPSRFSGSG--SGTTYTLT------IS-SLQPEDFATYYCQQ
GYSTP--
>V60RF-ADFV01192035.1-trav |(8555, 8856)|2.96595641525|(0.996,0.981,0.990)|1
-GLRAQLVAQPEDQVTVAEGNPLTVKCTYSVSG------NPYLFWYVQYPNQGLQ---FL
LKYIAGD--N-LV--K--GSYGFEAEFNKSQTSFYLK------KP-SALVSDSALYFCAV
RD-----
>V61RF-ADFV01192035.1-trav |(53089, 53379)|2.99294800078|(0.996,0.999,0.998)|1
-MNRGEDVEQSL-FLGVREGDSSVINCTYTDSS------STYLYWYKQEPGAGLQ---LL
TYIFSNM--D-LK-----QDQRLTVLLNKKDKHLSLR------IA-DTQTGDSAIYFCAE
S------
>V62RF-ADFV01192035.1-trav |(63802, 64090)|2.98694800078|(0.996,0.993,0.998)|1
--VKSQKIEQNSEALNIQEGKTATLTCNYTNYS------PAYLLWYRQDPGRGPV---FL
LLIRENE--K-EK-----RKERLKVTFDTTLKQSLFH------IT-ASQPADSATYLCAL
-------
>V63RF-ADFV01192035.1-trav |(73447, 73734)|2.95774192532|(0.991,0.969,1.000)|1
-ANGEKQVEHSPHFLGSQQGDVASVSCMYSVSR------FNNLQWYRQNTGMGPK---HL
LSMYSAG--Y-EK-----QKGRLNATLL--KNGSSLY------IT-AVQPEDSATYFCAV
D------
>V64RF-ADFV01192035.1-trav |(102005, 102299)|2.97870083945|(0.999,1.000,0.981)|1
-GINGDSVVQTEGQVLLSEGDSLIVNCSYETTQ------YPSLFWYVQYPGEGPQ---LL
LKAMKAN--D--K--G--RNKGFEATYHKETTSFHLE------KD-SVQEADSAVYFCAL
S------
>V65RF-ADFV01192037.1-trav |(3179, 3470)|2.95216889635|(0.986,0.969,0.999)|1
-GSCKNQVEQSPQSLIILEGKNCTLQCNYTVSP------FNNLRWYKQDTGKGPV---SL
TIMTLSE--N-TK-----SNGRYTATLDADTKQSSLH------IT-ASQLSDSASYICVV
-------
>V66RF-ADFV01192037.1-trav |(20251, 20539)|2.98258408012|(0.997,0.987,0.999)|1
VWSQRKEVEQDPGPFNVPEGATVAFNCTYSNSV------SQSFFWYRQDCRKEPK---LL
MSVYSSG--N-E-------DGRFTAQLNRASQYIYLL------IR-DSQLSDSATYLCAV
-------
>V67RF-ADFV01192037.1-trav |(26000, 26297)|2.99598400013|(0.998,1.000,0.998)|1
-GTRAQSVTQLDSHVSVSEGTPVLLRCNYSSSY------SPSLFWYVQYPNQGLQ---LL
LKYTSGT--T-LV--K--GINGFEAEFKKSETSFHLT------KS-SAHVSDAAEYFCAV
S------
>V68RF-ADFV01192037.1-trav |(31699, 31996)|2.85283890549|(0.992,0.926,0.957)|1
-TARAQSVTQPDIHITVSEGASLELRCNYSYGA------TPSLFWYVQSPGRGLQ---LL
LKYFSGD--T-LV--Q--GIKGFEAEFQRSQSSFNLR------KP-SVHWSDAAEYFCAV
S------
>V70RF-ADFV01192038.1-trav |(22028, 22319)|2.98209640489|(0.999,0.984,1.000)|1
VWSQQKEVEQNSGPLSDPEGAIASLNCTYSDRS------SQSFFWYRQYSGKSPE---LI
TSIYSNG--D-K------EDGRFTAQLNKASQYVSLL------IR-DSQLSDSATYLCAV
-------
>V71RF-ADFV01192038.1-trav |(28540, 28837)|2.9824040992|(1.000,0.990,0.993)|1
-GTRAQSVTQLDSHVSVSEGTLVLLRCNYSSSV------SPNLFWYVQYPNQGLQ---LL
LKYISGT--T-LV--K--GINGFEAEFKKSETSFHLT------KP-SAHVSDAAEYFCAV
S------
>V72RF-ADFV01192038.1-trav |(50418, 50711)|2.98676801985|(0.997,0.990,1.000)|1
-VSRGESVGLHLPTLSVQEGNNSVINCAYSDSA------SDYFTWYKQESGKGPQ---FI
IDIRSNM--D-KR-----QGQRVTVLLNKTVKHLSLQ------IA-ATQPGDSAVYFCAE
N------
>V73RF-ADFV01192039.1-trav |(5009, 5312)|2.99089600501|(0.995,0.996,1.000)|1
-PGIAQKIIQTQPAMFVQEKEAVTLDCTYDTSD-----QSYGLFWYKQPSSGEMI---FL
ISQASYD--K-Q----NATEGRYSLNFQKARKSANLV------IS-ASQLGDSAKYFCAM
RE-----
>V74RF-ADFV01192039.1-trav |(24309, 24603)|2.9909280013|(0.997,0.994,1.000)|1
-RTHGDSVTQMEGPVTLSEEAFLTINCTYTATG------YPTLFWYVQYPGEGPQ---LL
LKATRAD--D--K--G--SNKGFEATYRKETTSFHLE------KD-SVQESDSAVYFCAL
S------
>V75RF-ADFV01192039.1-trav |(50026, 50319)|2.98386400565|(0.994,0.999,0.991)|1
VWCQQKEVEQNPGPLSVPEGAIASLNCTYSNSA------FQYFMWYRQYSRKGPE---LL
MYTYSSG--N-K------EDGRFTAQVDKSSKCISLF------IR-NSQPSDSATYLCAM
S------
>V77RF-ADFV01192039.1-trav |(82783, 83070)|2.96370067828|(0.996,0.979,0.990)|1
--VNSQQGEEDPQALTIQEGENATMNCSYKSS-------TNSLQWYRQESGRGLV---HL
ILIRSNE--R-EK-----HSGRLRVTLDTSKKSSSLL------IT-ASRAADTASYFCAM
E------
>V78RF-ADFV01192039.1-trav |(88347, 88638)|2.98896000066|(0.997,0.994,0.998)|1
-RTNGDSVTQTEGPVTLPEQAALTLNCTYQSSY------STFLFWYVQYLNKAPE---LL
LKSS-EN--Q--E--T--DSRGFQASHVKSDSSFHLE------KP-SVQLSDSAVYYCAL
R------
>V79RF-ADFV01192039.1-trdv |(91529, 91832)|2.86669524928|(0.985,0.937,0.957)|1
-SSMTQKVTQAQTEISVVEKEDVTLDCVYESRD-----TTYYLFWYKQLPSGELV---FL
IRQNSFN--E-Q----NEINGRYSWNFQKSTSSFNLT------IT-ASQVMDSAVYFCAL
ND-----
>V80RF-ADFV01192040.1-trav |(2622, 2909)|2.32468794359|(0.905,0.676,0.937)|1
-LSGEDQVTQSPEALRLQEGENSSLICSYTVSN------LRGLLWYRQDPGKGPE---FL
FILYSAG--E-EK-----EKERLKATLTKE--ESFLH------IT-APKPEDSATYLCAV
Q------
>V87RF-ADFV01192042.1-trav |(56528, 56818)|2.97745609036|(0.994,1.000,0.984)|1
--TIIDAKTTQPTSMDCAEGRAANLPCNHSTIS-----GNEYVYWYRQIHSQGPQ---YI
IHGLKNN--A--------TNEMASLIITEDRKSSTLI------LP-HATLRDTAVYYCIV
RV-----
>V93RF-ADFV01192045.1-trav |(29460, 29750)|2.90245386218|(0.966,0.987,0.952)|1
-VSSEDKVVQSPLSLVVHEGDTVTLNCSYEVTN------FRSLLWYKQEK-KAPT---FL
FMLTSSG--I-EK-----KSGRLSGILDNRELFSILN------IT-ATETRDSAIYLCAV
E------
>V94RF-ADFV01192049.1-trdv |(617, 918)|2.67815267208|(0.954,0.862,0.905)|1
-SGMAQTVTQSQPEMSVQEAETVTLSCTYDTTE-----SDYYLFWYKLPPSRQMI---LI
IRQEAYK--Q-Q----NATENHFSVNFQKAAKSFSLK------IS-DSQLGDTAMYFCAF
M------
>V95RF-ADFV01192049.1-trav |(9724, 10024)|2.98570803341|(0.999,0.991,0.996)|1
-FSMAQTVTQSQPEMSVQEAETVTLSCTYDTTE-----SDYYLFWYKQPPSRQMI---LI
IRQEAYK--Q-Q----NATENRFSVNFQKAAKSFSLK------IS-DSQLGDTAMYFCAY
R------
>V96RF-ADFV01192050.1-trav |(14951, 15239)|2.96069025636|(0.993,0.970,1.000)|1
-LSGELKVGQNPPFLSTQEGKNYTIYCNYSTIS-------DRLYWYRQDPGKSLE---SL
FVLLSSG--A-VK-----QEGRLMASLDTKARLSTLH------IT-AAVHDLSATYFCAV
-------
>V98RF-ADFV01046571.1-trgv |(4061, 4374)|2.96755704207|(0.996,0.996,0.977)|-1
-SQKSSNLEGRTKSVTRPTGSSAEITCDLTVTD------TFYIHWYLHQEGKAPQ---RL
LYYDVSD--SRDVLESGLSQVKYYTHT-PRRWSWILI------LR-NLIENDSGVYYCAS
WG-----
>V99RF-ADFV01046573.1-trgv |(27483, 27793)|2.45361867528|(0.949,0.876,0.770)|-1
-SQKSSNLEGRTKSVTRPTGSSAEITCDLPGAS------TLYIHWYLHQEGKAPQ---RL
LYYEPYY--FRVVLESGITPGKYDTAST--RSSWNLR------LQ-NLIEKDSGVYYCAT
WD-----
>V100RF-ADFV01106195.1-igkv |(132520, 132838)|2.36991881757|(0.997,0.690,0.997)|-1
-AYGDIVMTQSPDSLAVSLGERVTINCKSSQSVLYSSNNKNYLNWYQQKPGQAPK---LL
IYW------A-STRESG-VPDRFSGSG--SGTDFTLT------IS-SLQAEDVAVYYCQQ
SYSTP--
>V101RF-ADFV01106214.1-igkv |(93146, 93461)|2.73656294027|(0.982,0.843,0.986)|-1
-TSGDIVMTQTPLSLPVTPGEPTSISCRSSQSLLHS-DGCTYLAWYLQKPGQSPQ---LL
IYA------V-SYRASG-VPDRFSGSG--SGTDFTLK------IS-RVEAEDVGVYYCMQ
ALQAP--
>V102RF-ADFV01106214.1-igkv |(102002, 102302)|3.0|(1.000,1.000,1.000)|-1
-ARCDIQMTQSPSSLSASVGDSVTITCRASQGI------SNWLAWYQQKPGKAPK---LL
IYK------A-SSLQSG-IPSRFSGSG--SGTTYTLT------IS-SLQPEDFATYYCQQ
SYSTP--
>V103RF-ADFV01131933.1-ighv |(14064, 14373)|2.99696400065|(1.000,0.997,1.000)|-1
-AHSQVQLVQS-GAEVKKPGASVKVSCKASGYTF--T--SYNMYWVRQAPGQGLE---WM
GVINPSS--G-GTSYAQKFQGRVTMTRDTSISTAYME------LS-SLRSEDTATYYCAR
-------
>V104RF-ADFV01131938.1-ighv |(1713, 2022)|2.9789280013|(0.993,0.996,0.990)|-1
-AHSQVQLVQS-GAEVKKPGTSVKVSCKASGYTF--T--SYAMNWARQAPGQRLE---WM
GWINTNT--G-NPTYAQGFKERFVFSMDTSVSTAYLQ------IS-SLKAEDTAVYYCAR
-------
>V105RF-ADFV01131939.1-ighv |(1427, 1736)|2.9789280013|(0.993,0.996,0.990)|-1
-AHSQVQLVQS-GAEVKKPGTSVKVSCKASGYTF--T--SYAMNWARQAPGQRLE---WM
GWINTNT--G-NPTYAQGFKERFVFSMDTSVSTAYLQ------IS-SLKAEDTAVYYCAR
-------
>V106RF-ADFV01131940.1-ighv |(4183, 4492)|3.0|(1.000,1.000,1.000)|-1
-VQCDVQLVES-GGGLAQPGGSLRLSCAASGFTF--S--NYYMSWVRQAPGKGLE---WV
SYISGD--SS-YIYYADSVKGRFTISRDNAKNSLYLQ------MN-SLRAEDTAVYYCTR
-------
>V107RF-ADFV01131940.1-ighv |(12421, 12735)|2.48814052572|(0.954,0.765,0.910)|-1
-VLSQVTLKES-GPTLVKPTQTLTLTCTFSGFSL--STSGVGVGWIRQPPGKALE---WL
ARIDWD---D-DKYYSTSLKTRLTISKDTSKNQVVLT------MT-NMDPVDTATYYCAR
R------
>V108RF-ADFV01131940.1-ighv |(27838, 28144)|2.71748950129|(0.994,1.000,0.828)|-1
-VLSQVQLQES-GPGLVKPSETLSLTCAVSGGSI--S-G-YYWSWIRQPPGKGLE---WI
GSIDS-S--G-SKYLNPSLKSRVTMSADTSKNQFSLK------LS-SVTAADTAVYYCAR
-------
>V109RF-ADFV01131944.1-ighv |(5787, 6101)|2.99899600001|(1.000,0.999,1.000)|-1
-VQCAVQLVES-GGGLVQPGGSLRLSCAASGFTF--S--DYYMSWVRQAPGKGLE---WV
AVIRNKANGG-TTEYAASVKGRFTISRDDSKSIAYLQ------MN-SLKTEDTAVYYCAE
-------
>V110RF-ADFV01131946.1-ighv |(2041, 2350)|2.98474003277|(0.998,0.997,0.990)|-1
-AHSEVQLVQS-GAEVKKPGATVKISCKVSGYTF--T--SYYMHWVQQAPGKGLE---WM
GGVDPEG--G-ETIYAEKFQGRVTITADTSTDTAYME------LS-SLRSEDTAVYYCAR
-------
>V111RF-ADFV01131948.1-ighv |(1585, 1907)|2.43606576492|(0.915,0.720,0.946)|-1
-VLSQVTLKES-GPALVKPTETLTLTCTVSGFSL--STSGMGMSWIRQPPGKALE---WL
AHIFSN---D-QKSYSTSLKSRLTISKDTSKSQVVLA------MT-NMDPVDTATYYCAR
RAQ----
>V112RF-ADFV01131950.1-ighv |(11086, 11386)|3.0|(1.000,1.000,1.000)|-1
--QCEVQLVES-GGSLVQPGGSLRLSCAASGFTF--S--DYYMHWVRQAPGKGLE---WV
SEITN----S-STYYADSVKGRFTISRDNAKNTLYLQ------MN-SLRAEDTAVYYCAK
-------
>V113RF-ADFV01131950.1-ighv |(21617, 21923)|3.0|(1.000,1.000,1.000)|-1
-VLSQVQLQES-GPGLVKPSETLSLTCAVSGGSI--S-G-YYWSWIRQPPGKGLE---WI
GYIYS-S--G-STNYNPSLKSRVTMSVDTSKNQFSLK------LS-SVTAEDTAVYYCAR
-------
>V114RF-ADFV01131951.1-ighv |(9601, 9910)|3.0|(1.000,1.000,1.000)|-1
-VQCEVQLVES-GGGLVQPGGSLRLSCAASGFTF--S--SYDMNWVRQAPGKGLE---WV
SYISSG--GG-TIYYADSVKGRFTISRDNAKNSLYLQ------MN-SLRAEDTAVYYCAK
-------
>V115RF-ADFV01131951.1-ighv |(17955, 18261)|2.68427814164|(0.962,0.859,0.914)|-1
-VLSQVQLQQW-SAGPVKPSETLSLTCAVYGGSI----SGYYWGWIRQPPGKGLE---WI
GLIDS-S--G-STNYNPSLRSRVTMSVDTSKNQFSLK------LS-SVTAADTAVYYCAR
-------
>V116RF-ADFV01131954.1-ighv |(4903, 5218)|3.0|(1.000,1.000,1.000)|-1
-VQCEVQLVES-GGGLVQPGGSLRLSCAASGFTF--S--DYAMSWVRQAPGKGLE---WV
GFIRSKAYGG-TTEYAASVKGRFTISRDDSKSVAYLQ------MN-SLKTEDTAVYYCTR
-------
>V117RF-ADFV01131956.1-ighv |(7476, 7785)|3.0|(1.000,1.000,1.000)|-1
-VQCEVQLVES-GGGLVQPGASLKLSCAASGFTF--S--SYGMHWVRQAPGKGLE---WV
SSISTSS--S-YIYYADSVKGRFTISRDNSKNTLYLQ------MN-SLRAEDTAVYYCAR
-------
>V119RF-ADFV01131957.1-ighv |(4591, 4897)|2.84018969173|(0.976,0.897,0.993)|-1
-VLSQVQLQES-GPGLVKLSETLSLTCAVSGGSI--S-G-YYWSWIGQPAGKGLE---WI
GYIHS-S--G-STNYNPSLKSRVTMSADTSKNQFSLK------LS-SVTAEDTAVYYCAR
-------
>V120RF-ADFV01131958.1-ighv |(4025, 4334)|2.99596000066|(1.000,0.997,0.999)|-1
-AHSQVQLVQS-GPEVKKPGASVKVSCKASGYTF--T--SSAMQWVRQAPGQGLE---WM
GWIIVGN--G-NTNYAQKFQGRVTITRDTSTSTAYME------LS-SLRSEDTAVYYCAT
-------
>V121RF-ADFV01131959.1-ighv |(269, 578)|2.95921476928|(0.999,0.988,0.975)|-1
-AHSEVQLVQS-GAEVKKPGATVKISCKASGYTF--T--SSYMHWVQQAPGKGLE---WM
GRVDPED--G-ETKYAEKFQGRVTITADTSTDTAYME------LS-SLRSEDTAVYYCAT
-------
>V122RF-ADFV01131961.1-ighv |(38, 353)|3.0|(1.000,1.000,1.000)|-1
-VQCEVQLVES-GGGLVQPGGSLRLSCAASGFTF--S--NYWMHSVRQAPGKGLE---WV
GRIKNKADGG-TAEYAASVKGRFTISRDDSKNTLYLQ------MN-SLKTEDTAVYYCTR
-------
>V125RF-ADFV01131961.1-ighv |(37937, 38246)|3.0|(1.000,1.000,1.000)|-1
-VQCEVQLVES-GGGLVQPGGSLRLSCAASGFTF--S--SYGMNWVRQAPGKGLE---WV
SYISSG--GG-TIYYADSVKGRFTISRDNAKNSLYLQ------MN-SLRAEDTAVYYCTR
-------
>V126RF-ADFV01131961.1-ighv |(48794, 49103)|2.59164525147|(0.975,0.996,0.773)|-1
-VQSQVQLVQS-GAEVKKPGSSVKVSCKASGGTF--S--SYAISWVRQAPGQGLE---WM
GVIIPAA--D-LTNYAQKFQGRLTITADTSTSTAYME------LS-SLRSEDTAVYYCAR
-------
>V130RF-ADFV01132915.1-iglv |(116005, 116315)|2.47100399931|(0.949,0.938,0.742)|-1
-SWAEVVFTQP-HSVSGSPGQTVTISCTRSSGSI---AS-NYVHWYQQRPDSAPT---TV
IYS------D-DQRPSG-VPDPFSGSIDSSSNSASLT------IS-GLKSEDEADYYCQS
YDSSS--
>V131RF-ADFV01132918.1-iglv |(49559, 49868)|2.96906440553|(0.984,0.987,0.999)|-1
-SWAQSVLTQP-PSVSGTPGQRVTISCSGSSSNI---G-SNNVHWDQQLPGTAPK---LL
IYY------N-DQRPSG-VPDRFSGSK--SGTSASLA------IT-GLRSEDEADYYCEA
WDDSLSG
>V132RF-ADFV01132961.1-igkv |(18470, 18770)|2.99185201038|(0.999,0.993,1.000)|-1
-ARCDIQMTQSPSSLSVSVGDRVTITCRASQGI------SNELAWYQQKPGQAPM---LL
IYA------A-SSLQTG-VPSRFSGSG--SGTDYTLT------IS-SLQPEDVATYYCLQ
DYTTP--
>V133RF-ADFV01132961.1-igkv |(54096, 54396)|2.42603915281|(0.914,0.885,0.742)|-1
-ATCDIQMTQSPSSLSASVGDRVTITCRASQGI------NNELAWYQQKPWKDPK---LL
IYS------A-SNLLMG-VPSQFSGSG--PGTDYTLT------IS-SLQPEDAATYYCQW
DYNTP--
>V134RF-ADFV01132961.1-igkv |(60846, 61149)|2.27916323784|(0.982,0.770,0.807)|-1
-----IVMTQTPLSLPFTPGEAASISCRSSQSLLDS-DGYTYLDWYLQKPGQSPQ---LL
IYA------V-SNRASG-VPDRFSGSG--SGTDFTLK------IS-RVEAEDVGVYYCLQ
ALQAP--
>V135RF-ADFV01132961.1-igkv |(93218, 93536)|2.9711523093|(0.994,0.980,0.998)|-1
-STGDIVMTQTPLFLSITLGEPASISCRSSQSLFYSDDQNIYLDWYLQKPGQSPQ---LL
IYF------V-SYRASG-VPDRFSGSG--SGTDFILK------IS-RLEAEDVGVYYCMQ
RIEFP--
>V136RF-ADFV01132961.1-igkv |(104510, 104810)|2.99185201038|(0.999,1.000,0.993)|-1
-ARCDMQMTQSPSSLSASVGDTVTITCRASQSI------SSYLNWYQQKPGKIPK---LL
IYA------A-STLQSG-VPSRFSGSG--SGTDFTVT------IS-SVQPEDFATYYCQH
GYGTP--
>V137RF-ADFV01132961.1-igkv |(146778, 147093)|2.99899600001|(1.000,1.000,0.999)|-1
-SSGDIVMTQTPLSLSITPGEPASISCRSSQSLR-YSDGNTYLYWYLQKPGQSPQ---LL
IYR------V-SNRFSG-VPDRFSGSG--SGTDFTLK------IS-RVEAEDVGVYYCMQ
DLQAP--
>V138RF-ADFV01132961.1-igkv |(157570, 157870)|2.98771202074|(0.992,0.998,0.998)|-1
-ARCAIQMTQSPSSLSASVGDRVTITCRTSQGI------SNWIAWYQQKPGKAPK---HL
IYG------A-SNLQTG-VPSRFSESG--SGTDYTLT------VS-SLQPEDSTTYYCQQ
YDIFP--
>V139RF-ADFV01132961.1-igkv |(167109, 167423)|2.51657203979|(0.995,0.797,0.903)|-1
-SSGDVVMTQTPLSLPVTPGEPASISCRSSQSLLHS-NGNTYLHWYLQKPGQSPQ---LL
IYK------V-SNRASE-IPDRFSGSG--SGTDFTLK------IS-RVEAEDVGVYYCMQ
STKVS--
>V140RF-ADFV01132961.1-igkv |(188116, 188416)|2.98651211712|(0.999,1.000,0.988)|-1
-IRCAIQMTQSPSSLSASVGDRVTITCRASQGI------SNYLNWYQQKPGKAPK---LL
IYR------A-SSLETG-VPSRFSGSG--SGTDFALT------IS-SLQPEDIATYYCLQ
YDNLP--
>V141RF-ADFV01132961.1-igkv |(214992, 215307)|2.32139587219|(0.907,0.716,0.848)|-1
-SSGDVVMTQSPLSLPVTPGQPASISCRSSQSLVH-SDGKTYLYWFQQRPGQPPR---RL
IYQ------V-SNRDSG-VPDRFIGSG--AGTDFTLK------IS-RVEAEDVGVYYCMQ
GTQFP--
>V142RF-ADFV01132961.1-igkv |(225521, 225836)|2.94831671213|(0.993,0.979,0.978)|-1
-SSGDIVMTQTPLSLSITPGEPASISCRSSQSLR-HSNGYTYLDWYLQKPGQSPQ---LL
IYL------G-SNRASG-VPDRFSGSG--SGTDFTLK------IS-RVEAEDVGIYYCMQ
GIQLP--
>V143RF-ADFV01132961.1-igkv |(238675, 238990)|2.66201467401|(0.960,0.843,0.919)|-1
-SSGNIVLTQSPLSLPVTPGEPASISCRSSQSLLHS-NGYNYLYWYLQKPGQSPQ---LL
IYL------G-SNRASG-VPDRFSGSG--SGTDFTLK------IS-RVKAEDVGVYYCMQ
TLQTP--
>V144RF-ADFV01132961.1-igkv |(246969, 247267)|2.97642008525|(0.998,0.990,0.989)|-1
-TRCDIQMTQSPSSLSASVGDRVTITCRASQSI------SKWLAWYQQKPGKVPK---LL
IYA------A-STLQSG-VPSRLSGSG--SGTDFTLT------IS-SLQPEDVATYYCQK
HDSA---
>V146RF-ADFV01143437.1-ighv |(651, 966)|2.99899600001|(1.000,1.000,0.999)|-1
-VQCEVQLVES-GGSLVQPGGSLRLSCAASGFTF--S--DYYMHWVRQAPGKGLE---WV
GRIKNKAGGG-TAEYAASVKGRFTISRDDSKNTLYLQ------MN-SLKTEDTAVYYCTR
-------
>V148RF-ADFV01192057.1-trdv |(25030, 25336)|2.79696000066|(0.931,0.934,0.932)|-1
RGMLCDKVTQSSPDQTVASGSEVVLLCTYDTVY-----SNPDLFWFRIRPDYSFQ---FV
FYGDDSR--S-QA--ADFTQGRFSVKHILTQKAFHLV------IS-PVRIEDSATYYCAL
-------
>V0RF-AQIB01018214.1-trgv |(163723, 164036)|2.99280401921|(1.000,1.000,0.993)|1
-SQKSSNLEGRTKSVTRPTGSSAEITCDLPEVS------SFYIHWYLHQEGKAPQ---RL
LYYDTSN--SRVVLESGISSGKYDSYGST-RRNLRLI------LR-NLIENDSGVYYCAN
WD-----
>V1RF-AQIB01018215.1-trgv |(1470, 1783)|2.96140247224|(0.998,0.999,0.968)|1
-SQKSSNLEGRTKSVTRPTGSSAEITCDFSGDS------NFYIHWYLHQEGKAPQ---RL
LYYDVSN--SRDVLESGLSPGKYYTHT-RKRWSWILI------LR-NLIENDSGVYYCAN
WN-----
>V2RF-AQIB01018217.1-trgv |(6282, 6595)|2.98432022844|(0.999,1.000,0.986)|1
-SQKSSNLEGRTKSVTRPTGSSAEITCDLPEVS------SFYIHWYLHQEGKAPQ---RL
LYYDSSN--SRVVLESGISSGKYNSYE-STRRSLRLR------LQ-NLIENDSGVYYCAN
WD-----
>V3RF-AQIB01144236.1-igkv |(33225, 33525)|2.99899600001|(1.000,1.000,0.999)|1
-ARCDIQMTQSPSSLSASVGDRVTITCRASQGI------NKELSWYQQKPGKAPT---LL
IYA------A-SSLQTG-VPSRFSGSG--SGTDFTLA------IS-SLQPEDVATYYCLQ
DYTTP--
>V4RF-AQIB01144236.1-igkv |(99005, 99323)|2.96886989205|(1.000,0.993,0.978)|1
-SSGDIVMTQTPLSLPVTPGEPASISCRSSQSLLDSDDGNTYLDWYLQKPGQSPQ---LL
IYE------V-SNRASG-VPDRFSGSG--SDTDFTLK------IS-RVEAEDVGVYYCMQ
TIEYP--
>V5RF-AQIB01144237.1-igkv |(7567, 7881)|2.35606643487|(0.851,0.694,0.929)|1
-TSGDILLTQTPLSLPVTPGQLASISCRSSQSLLHS-NGNTYLHWYLQEPGQSPQ---LL
IYE------V-SNRASG-VPDRFSGSG--SDTDFTLK------IN-LVEAEDVGVYYCMQ
LHNGP--
>V7RF-AQIB01144237.1-igkv |(20593, 20893)|2.41310506154|(0.973,0.955,0.717)|1
-ARCDIQMTQSLSSLSASVGDRVTITCRASQGI------NNELAWYQQKPGKAPM---LL
LYS------G-SSLHTG-VPSRFSGSG--SGTDFTLA------IS-SLQPEDVAPYYCLQ
DYTTP--
>V8RF-AQIB01144237.1-igkv |(28737, 29052)|2.4340501565|(0.994,0.738,0.943)|1
-SSGDIVMTQTPLSLPVTPGEPASISCRSSQSLLDS-YGYTNLNWYLQKPGQSPQ---LL
IYL------G-SNRASG-VPDRFSGSG--SGTDFTLK------IS-GVEAEDVGVYYCMQ
GIQLP--
>V9RF-AQIB01144240.1-igkv |(12918, 13233)|2.98548011776|(1.000,0.989,0.997)|1
-TSGDIVMTQTPFSLPVNPGEPASISCRSSQSLS-DSDGYTYLYWYLQKPGQSPQ---LL
IYL------G-SNRASG-VPDRFSGSG--SGTDFTLK------IS-RVEAEDVGVYYCMQ
GIQLP--
>V10RF-AQIB01144242.1-igkv |(6923, 7238)|2.33918169547|(0.987,0.793,0.813)|1
-SSGDIVMTQTPLSLPVTPGEPASISCRSSQSLL-HSDGYTYLYWYVQKPGHSPQ---LL
IYL------V-SNRASG-VPDRFSGSG--SGTDFTLK------IS-RVEAEDVGVYYCLQ
GIQLP--
>V11RF-AQIB01144242.1-igkv |(18230, 18530)|2.994900005|(1.000,0.995,1.000)|1
-ARCDIQMTQSPSSLSASVGDRVTITCQGSQSL------SNFLNWYQQKPGKIPK---LL
IYR------A-SSLQSG-IPSRFSGSG--SGTDYTLT------IS-SLQPEDFATYYCQQ
GYSYP--
>V12RF-AQIB01144242.1-igkv |(33676, 33991)|2.93556771881|(0.997,0.951,0.996)|1
-TSGDIVMTQTPLSLPVTPGEPASISCRSSQSLLHS-NGYTYLDWYVQKPGQSPQ---LL
IYL------V-SSRASG-VPDRFSGSG--SGTDFTLK------IS-RVEAEDVGVYYCMQ
GTQLP--
>V13RF-AQIB01144243.1-igkv |(9275, 9590)|2.5193786115|(0.983,0.761,0.957)|1
-TSGDIVMTQIPLSLPVTPGEPASISCRSSQSLLHS-GGKTYLYWYLQKPGQSPQ---LL
IYE------L-SNRASG-VPDRFSGSG--SGTDFTLK------IS-GVEAEDVGVYYCMQ
GIQLP--
>V14RF-AQIB01144243.1-igkv |(18759, 19059)|3.0|(1.000,1.000,1.000)|1
-ARCDIQMTQSPSSLSASVGDRVTITCQASQGI------TNDLAWYQQKPGETPK---LL
IYE------A-SSLQSG-IPSRFSGSG--SGTDFTLT------IS-SLQPEDFATYYCQH
YYSTP--
>V15RF-AQIB01144243.1-igkv |(52384, 52684)|2.99796800026|(0.998,1.000,1.000)|1
-ARCDIQMTQSPSSLSASVGDRVTISCRASQNI------YSNLAWYQQKPGKTPK---LL
IYA------A-SSLQSG-IPSRFSGSG--SGTDFTLT------IS-SLQPEDYATYYCQH
HYGTP--
>V16RF-AQIB01144244.1-igkv |(12759, 13074)|2.52845103241|(0.986,0.749,0.995)|1
-SSGDIVMTQTPLSLPVTPGEPASISCRSSQSLL-HSDGRTYLYWYLQKPGQPPR---LL
IYT------V-SNRFSG-VPDRFSGSG--SGTDFTLK------IS-RVEAEDVGVYYCMQ
ALQNP--
>V17RF-AQIB01144247.1-igkv |(9074, 9389)|2.60210227438|(0.980,0.779,0.993)|1
-SIGDIVMTQTPLSLPVTPGEPASISCRSSQSLL-HSNGNTYLYWYLQKPGQPPQ---LL
IYR------V-SNRFSG-VPDRFSGSG--SGTDFTLK------IS-RVEAEDVGVYYCMQ
ALQTP--
>V18RF-AQIB01144251.1-igkv |(6848, 7148)|2.98874403277|(0.999,0.999,0.991)|1
-ARCDIQMTQSPSSLSASVGDRVTITCHASQGI------SNWLAWYQQKPGKAPK---LL
IYY------A-SNLETG-VPSRFSGSR--SGTDFTVT------IS-SLQPEDIATYYCQQ
YDNFP--
>V19RF-AQIB01144257.1-igkv |(11968, 12268)|2.97236527997|(0.997,1.000,0.977)|1
-ARCDIQMTQSPSSLSASVGDRVTITCRASQGI------NNYLSWYQQKPGKAPK---PL
IYY------A-SSLETG-VPSRFSGSG--SGPDYTLT------IS-SLQPEDIATYYCQQ
YDNFP--
>V20RF-AQIB01144258.1-igkv |(1398, 1700)|2.58335005376|(0.887,0.819,0.896)|1
-FSADVVMTQSPLSLPVTPGQPASITCRSSQSLLH-SNGNTYLNWFLQKPGQPPR---RL
IYT------V-SNRDSG-VPDRFSGSG--AGTDFTLK------IS-RVEAEDVGVYYCMQ
V------
>V21RF-AQIB01144263.1-igkv |(12287, 12602)|2.46610778961|(0.937,0.737,0.940)|1
-SSGDVVMTQSPLSLPVTLGQPVSISCRSSQSLVH-SDGKTYLNWLQQKPGQPPR---LL
IYQ------V-SNRYSG-VPDRFSGSG--AGTDFTLK------IS-RVEAEDVGVYYCMQ
GTHFP--
>V22RF-AQIB01144263.1-igkv |(20713, 21015)|2.67162740027|(0.976,0.842,0.931)|1
-SSGDVVMTQSPLSLPVTPGQPASISCRSSQSLVH-SDGKTYLNWFQQKPGQPPR---RL
IYQ------V-SSRDSG-VPDRFSGSG--AGTDFTLK------IS-RVEAEDVGVYYCVQ
G------
>V23RF-AQIB01144263.1-igkv |(50626, 50941)|2.73615570272|(0.996,0.845,0.983)|1
-SSGDIVMTQTPLSLPVTLGEPASISCRSSQSLV-YSDGKTYLDWYLQKPGQSPQ---LL
IYY------G-SNRASG-VPDRFSGSG--SGTDFTLK------IS-SVEAEDVGVYYCMQ
AIQTP--
>V24RF-AQIB01144263.1-igkv |(59031, 59331)|2.72652163966|(0.990,0.936,0.869)|1
-TRCAIQMTQSPSSLSASVGDRVTITCWASQSI------GSNLAWYQQKPGKVPK---LL
IYA------A-STLQSE-VPSRFSGSG--SGTDFTLS------IS-SLQPEDVATYYCQK
CDSAH--
>V25RF-AQIB01144263.1-igkv |(96224, 96526)|2.60447591431|(0.925,0.894,0.827)|1
-STGDVVMTQSPLSLPVTPGEPASISCRSSQSLLH-SSGNTYLSWFQQKPGQSPR---RL
IYK------V-SNRDSG-VPDRFTGSG--AGTDFTLK------IS-RVEAEDVGVYYCME
G------
>V26RF-AQIB01144264.1-igkv |(29331, 29633)|2.60447591431|(0.925,0.894,0.827)|1
-STGDVVMTQSPLSLPVTPGEPASISCRSSQSLLH-SSGNTYLSWFQQKPGQSPR---RL
IYK------V-SNRDSG-VPDRFTGSG--AGTDFTLK------IS-RVEAEDVGVYYCME
G------
>V27RF-AQIB01144264.1-igkv |(45678, 45976)|2.8490470192|(1.000,0.894,0.999)|1
-SKGEIVLTQSPAFRSVTLKEKVTITCQASQS------IGSSLHWYQQKPDQSPK---LL
IKY------A-SQSISG-VPSRFSGSG--SGTDFTLT------IN-SLEAEDAATYYCQQ
SSSF---
>V28RF-AQIB01144264.1-igkv |(72133, 72421)|2.99067605248|(1.000,0.991,1.000)|1
-----IVLTQSPATLSLSPGETATLSCRASQSV------GSSLAWYQQKPGQVPR---LL
IYG------A-SSRATG-IPDRFSGSG--SGTEFTLT------IS-SLQPEDFAVYYCQK
YSSSP--
>V29RF-AQIB01144264.1-igkv |(77620, 77920)|2.31825084019|(0.953,0.999,0.662)|1
-VRCDIQMTQSPSFLSASVGDRVTITCQASQSI------SNDLAWYQQKPGKSPT---LL
ICD------A-TNLHTG-VPSWFSGSG--SGADYYLT------IS-SLELEDFAAYYCQQ
EYSYP--
>V31RF-AQIB01144265.1-igkv |(9151, 9443)|2.83958358676|(0.998,0.889,0.999)|1
-SRGDIVMTQSPAFVSVTPGEKVTITCQASEG------ISNYLHWYQQKPDQAPK---LL
IQY------A-SQSISG-VPSRFTGSG--SGTDFTFT------IS-SLEVEDAATYYCQQ
GN-----
>V32RF-AQIB01144265.1-igkv |(25389, 25680)|2.98064403777|(0.998,0.993,0.990)|1
----DIQMTQSPSSLSASVGDRVTITCQASQSF------SSSLAWYQQKPGKAPK---LL
IYA------A-SSLQSG-VPSRFSGSK--AGTDFTLT------IS-SLQPEDVATYYCQQ
YYSTP--
>V33RF-AQIB01144265.1-igkv |(40570, 40862)|3.0|(1.000,1.000,1.000)|1
-AKCDIQMTQSPSSLSASVGDRVTITCRASQTI------SSYLAWYQQKPGKVPK---LL
IYA------A-SSLESG-IPSRFSGSG--SGTEFTLT------IS-SLQPEDFATYYCQQ
HN-----
>V34RF-AQIB01144265.1-igkv |(60992, 61284)|2.98493200206|(0.994,0.993,0.998)|1
-ARCDIQMTQSPSSLSASVGDRVTVTCRASQGI------SNYLSWYQQEPGKAPK---LL
IYA------A-SSLESG-VPSRFSGSG--SGTEFTLT------IS-SLQPEDFATYYCLQ
HN-----
>V35RF-AQIB01144265.1-igkv |(75665, 75964)|3.0|(1.000,1.000,1.000)|1
-TTGEIVMTQSPATLSLSPGERATLSCRASQSV------SSYLAWYQQKPGQAPR---LL
IYG------A-SSRATG-IPDRFSGSG--SGTEFTLT------IS-SLEPEDVGVYYCQQ
YNNWN--
>V36RF-AQIB01144265.1-igkv |(84906, 85206)|2.99799600001|(0.999,1.000,0.999)|1
-ARCDIQMTQSPSSLSASVGDRVTITCRASQGI------SNYLNWYQQKPGKAPK---LL
IYS------A-SRLQSG-VPSRFSGSG--SGTEFTLT------IS-SLQPEDFATYYCEQ
FKNYL--
>V37RF-AQIB01144269.1-igkv |(1727, 2027)|2.65098718013|(0.870,0.947,0.858)|1
-STGEIVMTQSPATLSLSPGETTTLSCSASQSV------GSYLAWYQQKPGQAPK---LL
IHS------A-YFRATG-IPDRFSGSG--SRTVFTLT------IS-SLEPEDVGVYYCQQ
YNDLP--
>V38RF-AQIB01144269.1-igkv |(40447, 40747)|2.99280401921|(1.000,1.000,0.993)|1
-ARCDIQLTQSPSSLSASVGDRVTITCRASQGI------SSYLAWYQQKPGKAPK---LL
IYD------A-SNLQSG-VPSRFSGSG--SGTEFTLT------IS-SLQPEDFATYYCQQ
RNSLP--
>V39RF-AQIB01144273.1-igkv |(1759, 2059)|2.99799200002|(1.000,0.999,0.999)|1
-ARCDIQMTQSPSSLSVSVGDRVTITCRASQGI------SNYLSWYQQKPGKAPK---LL
IYS------A-SSLESG-VPSRFSGSG--SGTDYTLT------IS-SLQPEDFAAYYCLQ
YQSIP--
>V40RF-AQIB01144273.1-igkv |(12272, 12572)|2.6994252064|(0.975,0.927,0.859)|1
-TTREIVFTQSPATLSLSPGERATLSCRASQSV------GSSLAWYQQKSGQAPR---LL
VYH------A-SSRATG-IPARFSGSG--SGTDFTLT------IS-SLEPEDVGVYYCQK
YNDWP--
>V41RF-AQIB01144273.1-igkv |(55407, 55707)|2.98432022844|(0.999,1.000,0.986)|1
-ARCDIQMTQSPSSLSASVGDRVTITCRASQGI------SNALAWYQQKPGKVPK---LL
IYA------A-SSLQSG-LPSGFSGSG--SGTEFTLT------IS-SLQPEDFATYYCQQ
GYSTP--
>V42RF-AQIB01144273.1-igkv |(67090, 67390)|3.0|(1.000,1.000,1.000)|1
-ARCDIQMTQSPSSLSASVGDRVTITCRASQGI------SNNLAWYQQKPGKAPK---LL
IYD------A-TTLQSG-VPSRFSGSG--SGTEFTLT------IS-SLQPEDFATYYCQQ
YNSYP--
>V43RF-AQIB01144273.1-igkv |(86428, 86728)|2.92157765396|(0.986,0.982,0.957)|1
-TTGEIVMTQSPATLSLSPGETATLSCKTSQSV------GSKLAWYQQKPGQAPR---LL
IYG------A-SSRATG-IPARFSGSG--SGTDFTLA------IS-SLEPEDVGAYYCQE
TSSLS--
>V44RF-AQIB01144274.1-igkv |(43133, 43433)|2.94081638724|(0.982,0.968,0.992)|1
-ARCDIQMTQSPSSLSASVGDTVTITCPASQGI------SSYLNWYQHKPGKAPK---LL
IYY------A-TTLQSG-VPSRFSGSG--SGTEFTLT------IS-SLQPEDFAAYYCQQ
YKSLP--
>V45RF-AQIB01144274.1-igkv |(49577, 49877)|3.0|(1.000,1.000,1.000)|1
-ARCDIQMTQSPSSLSASVGDKVTITCHASQGI------SSWLAWYQQKPGKAPK---LL
IYK------A-SSLQSG-VPSRFSGSG--SGTDFTLT------IS-SLQPEDFATYYCQQ
ITSAP--
>V47RF-AQIB01144276.1-igkv |(25002, 25302)|2.98580001921|(0.998,0.991,0.997)|1
-ARRDIQMSQSPSSLSASVGDRVTITCHASQGI------SSWLAWYQQKPGKAPK---LL
IYK------A-SSLQSG-VPSRFSGSG--SGTDFTLT------IS-SLQPEDFATYYCLQ
YDSNP--
>V48RF-AQIB01144276.1-igkv |(29444, 29742)|2.3746002007|(0.973,0.686,0.999)|1
-TTGEIVMTQSPATLALSPGERATLSCRASQSV------SSRLAWYQQKPGQAPR---LL
IYD------A-SSRATG-IPDRFSGSG--SGTDFTLT------IS-SLEPEDVAVYFCQQ
ESNW---
>V49RF-AQIB01144276.1-igkv |(40183, 40483)|2.994900005|(1.000,1.000,0.995)|1
-ARCDIQMTQSPSSLSASVGDRVTITCQASQGI------SNYLAWYQQKPGKAPK---LL
IYY------A-STLQSG-VPSRFSGSG--SGTEFTLT------IS-SLQPEDFATYYCQQ
HNSNP--
>V50RF-AQIB01144276.1-igkv |(56521, 56821)|3.0|(1.000,1.000,1.000)|1
-ARCDIQMTQSPSSLSASVGDRVTITCQASQGI------SNYLAWYQQKPGKAPK---PL
IYK------A-STLESG-VPSRFSGSG--SGTEFTLT------IS-SLQPEDFATYYCQQ
RNSYP--
>V51RF-AQIB01144282.1-igkv |(3113, 3400)|2.48225965808|(0.983,0.741,0.968)|1
-----TVVTQSPATLSLSPGERATVSCRTSQSV------SNRLAWYQQKPGQAPR---LL
IYG------A-SNRATG-IPARFSGSG--SGTDFTLT------IS-SLELEDAAVYYCQQ
DNDWK--
>V52RF-AQIB01144282.1-igkv |(46328, 46640)|2.9683601679|(0.995,0.991,0.983)|1
-CNGDIVLTQSPASLAVSPGQKATITCRASESVS--LFGINFIHWYQQKPGQPPK---LL
IYQ------A-SNKDTG-VPARFSGSG--SGTDFTLT------IN-PVEADDAANYYCLQ
SKTSP--
>V53RF-AQIB01144282.1-igkv |(64268, 64559)|2.96755704207|(0.996,0.977,0.996)|1
-----IVLTQSPTSMAVSQGERVTISCTASSSI-----STSYLHWYQQKPGFPPR---LL
VYT------T-SSLASG-VPARFSGSG--SGTSYTLT------IS-SMEAEDAANYYCQQ
GSSIP--
>V55RF-AQIB01146122.1-iglv |(12217, 12527)|2.97400040988|(0.995,0.980,1.000)|1
-SWAEVVFTQP-HSVSGSPGQTVTISCTRSSGSI---DS-SFVYWYQQRPGSAPT---TV
IYN------D-NRRPSG-VPDRFSGSIDSSSNSASLT------IS-GLKSEDEADYYCQS
DDSSG--
>V56RF-AQIB01146122.1-iglv |(69507, 69814)|2.99798400013|(1.000,0.998,1.000)|1
-SWAQSVLTQP-PSVSGAPGQRVTISCTGSSSNI---G-GYNVHWYQQLPGTTPK---LL
IYG------N-NQRPSG-VSDRFSGSK--SGTSASLT------IT-GLQSEDEADYYCQS
YDSSLS-
>V58RF-AQIB01146122.1-iglv |(92188, 92498)|2.55455580216|(0.985,0.767,0.976)|1
-SLSQPVLTQP-TSLSASPGASARLTCTLRSGIS---VGSYRVLWYQQKPGNPPR---YL
LNYHTDS--D-KDQGSG-VPSRFSGSKDASANAGILL------IS-GLQSEDEADYYCAI
-------
>V59RF-AQIB01146122.1-iglv |(97013, 97322)|2.99696400065|(1.000,0.997,1.000)|1
-CWAQSVLTQP-PSASGAPGQSVTISCSGSSSNI---G-SNSVYWYQQFPGTAPK---LL
IYY------S-NQRPSG-VPDRFSGSK--SGTSASLT------IS-GLQSEDEADYYCAA
WDDSLSG
>V60RF-AQIB01146122.1-iglv |(110604, 110914)|2.30021328572|(0.996,0.972,0.674)|1
-SLSQPVLTQP-ASLSASPGASASLTCTFSGGIN---VAGYYIYWYQQKPGSPPR---YL
LRYKSDS--E-KHQGSG-VPSRFSGSKDASANTGILR------IS-GLQSEDEADYYCAI
-------
>V61RF-AQIB01146122.1-iglv |(126866, 127176)|2.90442445559|(0.986,0.946,0.979)|1
-SLSQPVLTQP-TSLSASPGASVRLTCTLRSGIS---VGGYNIHWYQQKPGSPPR---YL
LYYYSDS--N-KGQGSG-VPSRFSASKDASANAGILL------IS-GFQSEDEADYYCTT
-------
>V62RF-AQIB01146122.1-iglv |(131665, 131974)|2.99496000066|(0.999,1.000,0.996)|1
-SWAQSVLTQP-PSASGAPGQSVTISCSGSSSNI---G-SNYVSWYQQLSGKAPK---LL
IYK------N-SQRPSG-VPDRFSGSK--SGTSASLT------IS-GLRSEDEADYYCAA
WDDSLNG
>V63RF-AQIB01146122.1-iglv |(149998, 150308)|2.97456084981|(1.000,0.994,0.982)|1
-SLSQPVLTQP-ASLSASPGASARLSCTLSSGIN---VGSYSIYWYQQKPGSPPR---YL
LYYYSDS--S-KGQGSG-VPSRFSGSKDASANAGLLL------IS-GLQSEDEADYYCAI
-------
>V64RF-AQIB01146122.1-iglv |(159131, 159440)|2.99798400013|(1.000,1.000,0.998)|1
-SWAQSVLTQP-PSVSGAPGQRVTISCTGSSSNI---G-GYYVQWYQQLSGTAPK---LL
IYG------N-NQRPSG-VSDRFSGSK--SGTSASLT------IT-GLQSEDEADYYCET
WDNSLNG
>V65RF-AQIB01146122.1-iglv |(164963, 165270)|2.96128218009|(0.976,0.998,0.990)|1
-SWAQSVLTQP-PSVSGAPGQRVTISCTGSSSNI---G-GYDVHWYQQLPGTTPK---LL
IYD------N-NKRPSG-VSDRFSGSK--SGTSASLT------IT-GLQTEDEADYFCQS
YDSSLG-
>V66RF-AQIB01146122.1-iglv |(187790, 188100)|2.82253770979|(0.998,0.972,0.896)|1
-SLSQPVLTQP-ASLSASPGASASLTCTFSGGIN---VAGYYIYWYQQKPGSPPR---YL
LWYKSDS--D-KHQGSG-VPSRFSGSKDASANTGILR------IS-GLQSEDEADYYCAI
-------
>V67RF-AQIB01146123.1-iglv |(2181, 2490)|2.97554805197|(0.997,0.989,0.990)|1
-SWAQSVLTQP-RSASEATRKSITISCSGSSSNI---G-SNYVSWYQQLPGTAPK---LL
IYY------N-DWRASG-VSDRFSGSK--SGTSASLA------IS-GLQTEDEADYYCAA
WDDSLSG
>V69RF-AQIB01146133.1-iglv |(25439, 25742)|2.99899200002|(0.999,1.000,1.000)|1
-SWAQSALTQS-PSVSGSPGQSVTISCTGTSSDV---GGYNYVSWYQQHPGKAPK---LM
IYE------V-SKRPSG-VSDRFSGSK--SGNTASLT------IS-GLQAEDEADYYCCS
YTTS---
>V70RF-AQIB01146133.1-iglv |(37913, 38216)|2.76876297038|(0.987,0.902,0.924)|1
-SAASYDLTQP-HSVSVSPGQTARITCGGDD--I---GS-EAVHWYQQKPAQAPV---LV
IYD------N-SDRPSG-IPERFSGSN--SGNTATLT------IS-GVEAGDEADYYCQV
WDISSDH
>V73RF-AQIB01146136.1-iglv |(1665, 1968)|2.99696400065|(1.000,0.997,1.000)|1
-SWAQSAPTQP-RSVSGSPGQSVTISCTGTSSDI---GGYNYVSWYQQHPGTAPK---LM
IYG------V-SNRPSG-VSDRFSGSK--SGNTASLT------IS-GLQAEDEADYYCCS
YTTS---
>V74RF-AQIB01146137.1-iglv |(9886, 10183)|2.9849280013|(0.993,0.996,0.996)|1
-SVASYELTQP-PSVSVSPGQTARITCSGDV--L---KE-NYADWYQQKPGQAPV---LL
IYE------D-SKRPSG-IPERFSGST--SGDTTTLT------IS-STLSEDGADYYCFS
GDENN--
>V75RF-AQIB01146137.1-iglv |(18233, 18536)|2.76657138069|(1.000,0.869,0.968)|1
-SAVSYELTQP-RSVSVSPGQTARITCGGDS--I---GS-KYVHWYQQKPAQAPV---LV
IYD------N-SNRPSG-IPERFSGSN--SGNTATLT------IS-GVQAGDEADYYCQV
WDSSSKH
>V76RF-AQIB01146137.1-iglv |(25864, 26167)|2.99598000014|(0.999,1.000,0.997)|1
-SVVSSELTQD-PAVSVALGQTVRITCQGDS--L---RS-SYASWYQQKPGQAPV---LV
VYG------N-NNRPSG-IPERFSGSS--SGNTASLT------IT-GAQVEDEADYYCNS
WDSSGNH
>V77RF-AQIB01146138.1-iglv |(15714, 16017)|2.9909280013|(0.995,0.998,0.998)|1
-SWAQAALTQP-PSVSKSLGQSVTISCTGTSSDI---AAYNDVSWYQQHPGTAPR---LL
IYS------V-SNRPSG-VSDCFSGSK--SGNTASLT------IS-GLQAEDEADYYCCS
YRSG---
>V78RF-AQIB01146138.1-iglv |(24129, 24432)|2.76657138069|(1.000,0.869,0.968)|1
-SAVSYELTQP-RSVSVSPGQTARITCGGDS--I---GS-KYVHWYQQKPAQAPV---LV
IYD------N-SNRPSG-IPERFSGSN--SGNTATLT------IS-GVQAGDEADYYCQV
WDSSSKH
>V79RF-AQIB01146140.1-iglv |(2757, 3067)|2.79598949566|(1.000,0.872,0.988)|1
-SWAQAALTQP-HSVSGSPGQSVTISCTGTSSDI---GGYNRVSWYQQHPGKAPK---LM
IYE------V-SNRPSG-VSDRFSGSK--SGNTASLT------IS-GLQAEDEADYYCSS
YASSSN-
>V80RF-AQIB01146140.1-iglv |(26014, 26324)|2.99196000066|(0.998,0.999,0.995)|1
-SWAQAALTQP-PSVSGSPGQSVTISCTGTSSDV---GGYNYVSWYQQHPGKAPK---LM
IYE------V-NKRPSG-VSDRFSGSK--SGNTASLT------IS-GLQAEDEADYYCSS
YAGSNT-
>V81RF-AQIB01146141.1-iglv |(2344, 2645)|2.9898400105|(0.998,0.992,1.000)|1
-SVASYELTQP-PSVSVSPGQTARITCSGDA--L---PD-NYAYWFQQKPGQSPV---LI
IYE------D-SKRPSG-IPERFSGSS--SGTVATLT------IS-GAQVEDEADYYCYS
ADSSGN-
>V83RF-AQIB01146141.1-iglv |(13491, 13794)|2.99798400013|(1.000,0.998,1.000)|1
-SWAQAAPTQS-PSVSGSAGQSVTISCTGTSSDI---GGYNRVSWYQQHPGKAPK---LM
IYE------V-SKRPSG-VSDRFSGSK--SGNTASLT------IS-GLQAEDEADYYCSS
YAGS---
>V84RF-AQIB01146141.1-iglv |(50602, 50912)|2.83656035716|(0.979,0.910,0.967)|1
-SWAQSAPIQS-PSVSGSLGQSVTISCTGTSSDI---GRYNYVSWYRQQPGTTTK---LT
MYN------V-NTRPSG-VSDRFSGSK--SGNTASLT------IS-GLQAEDEADYYCSS
YETSDT-
>V85RF-AQIB01153480.1-ighv |(7301, 7610)|2.96261205453|(0.992,0.988,0.983)|1
-VLSQLQLQES-GPGLVKPSETLSLTCAVSGGSI--S-S-YWWGWIRQAPGKGLE---WI
GNIYGSG--G-STEYNPSLKSRVTISKDTSKNQFSLK------LS-SVTAADTAVYYCAR
-------
>V86RF-AQIB01153481.1-ighv |(29869, 30184)|3.0|(1.000,1.000,1.000)|1
-VQCEVQLVES-GGGLIQPGGSLRLSCAASGFTF--S--DYAMSWVRQASGKGLE---WV
GYIRSKSNNY-ATEYAASVKGRFTISRDDSKNTLYLQ------MS-GLKTEDTAVYYCTI
-------
>V87RF-AQIB01153482.1-ighv |(4668, 4983)|3.0|(1.000,1.000,1.000)|1
-VQCEVQLVES-GGGLVQPGGSLRLSCAASGFTF--S--DHYMQWVRQAPGKGLE---WV
GFIRSKAYGG-TAEYAASVKGRFTISRDDSKSITSLQ------MN-SLKTEDTAVYYCTR
-------
>V88RF-AQIB01153482.1-ighv |(18678, 18987)|3.0|(1.000,1.000,1.000)|1
-VQCEVQLVES-GGGLVQPGGSLKLSCAASGFTF--G--DYAMSWVRQAPGKGLE---WV
SSISNT--GK-TTYYADSVKGRFTISRDNAKNSLSLQ------MN-SLRAEDTAVYYCAR
-------
>V89RF-AQIB01153482.1-ighv |(23774, 24083)|2.78259051477|(0.999,0.859,1.000)|1
-VQGEVQLVES-GGGLAKPGGSLRLSCAASGFTF--S--NYYMHWVRQAPGKGLE---WV
SSINTG--GG-STYYADSVKGRFTISRDNSKNTLSLQ------MD-SLRAEDTAVYYCAK
-------
>V90RF-AQIB01153484.1-ighv |(24203, 24512)|2.26541477313|(0.761,0.709,0.820)|1
-AQSQVQLVQP-GAEMRKPGDSVKVSCKASGYTF--T--NHDVDWVRQAPGQGPE---WM
GGINTNT--G-GTSCAQTFQGRVTMTRDTTTSTAFME------LS-SLRSEDTAVYYCAR
-------
>V91RF-AQIB01153484.1-ighv |(33458, 33767)|2.76346990442|(0.957,0.987,0.860)|1
-AHSQVQLVQS-GAEIKQPGASVKLSCKASGYTF--T--SYYMHWVRQAPGQGLE---WI
GLISPYN--G-NKGYAQNFQGRVTITTDTSTSTGYME------LS-SLRSEDTAVYYCTR
-------
>V92RF-AQIB01153485.1-ighv |(161, 470)|2.78767053933|(0.944,0.875,1.000)|1
-VQGEVQLVES-GGGLAKPGGSLRLSCAASGFTF--S--DYHMHWVRQAPGKGLQ---WV
SAINSG--GG-STWYADSVKGRFTISRENAKNTLYLQ------MD-SLRAEDTAVYYCAK
-------
>V93RF-AQIB01153486.1-ighv |(413, 728)|2.99798400013|(1.000,0.998,1.000)|1
-VQCEVQLVES-GGGLVQPGGSLRLSCAASGFTF--S--DYAMHWVRQAPGKGPE---WV
GFIRSKAYGG-TAEYAASVKGRFTISRDDSKNTAYLQ------MN-SLKTEDTAVYYCTI
-------
>V94RF-AQIB01153489.1-ighv |(27642, 27951)|2.71085161002|(0.944,0.950,0.851)|1
-AHSEVQLVQS-GAEVRKPGASVKVSCKVSGYTL--T--ELSMHWVRQAPGKGLE---WM
GGVDPVY--G-ETIHAEKFQGRVTMTEDTSTDTAYME------LS-SLRSEDTAVYYCAR
-------
>V96RF-AQIB01153491.1-ighv |(11513, 11822)|2.49806193839|(0.942,0.961,0.743)|1
-VHSQVQLVQS-GAEVKKPGASVKLSCKASGFTL--G--SYAISWVRQAPGQGLE---WM
GGIIPLV--G-ITNYAQKFQGRVTITADTSTTTAYME------LS-SLRSEDTAVYYCAR
-------
>V97RF-AQIB01153491.1-ighv |(20597, 20906)|2.3114643416|(0.831,0.989,0.677)|1
-AHSQVQLVQS-GAEVEKPGASVKVSCKATGYTF--T--NYFMQWVRQAPGQGLE---WM
GWVYLGN--G-NTNYVQKFQGRVTMTRDVSTNTAYME------LG-SLRSKDMAVYYCAR
-------
>V98RF-AQIB01153492.1-ighv |(6792, 7104)|2.99598000014|(0.999,1.000,0.997)|1
-VLSQVQLQES-GPGLVKPSETLSLTCAVSGGSI--S--SSYWSWIRQSPGKGLE---WI
GDIYGSS-GG-STSYNPSLKSRVTMSVDTSKNQFSLK------LS-SVTAADTAVYYCAR
-------
>V99RF-AQIB01153498.1-ighv |(778, 1087)|2.68004142764|(0.997,0.999,0.812)|1
-AHSQVQLVQS-GAEVKKPGSSVKVSCKASGYTF--T--DYYMQWVRQAPGQGLE---WM
GRINPKT--G-GTDYAQKFQGRVTMTRDTSTSTAYME------LS-SLRSEDTAVYYCAR
-------
>V100RF-AQIB01153501.1-ighv |(4567, 4876)|3.0|(1.000,1.000,1.000)|1
-VQCEVQLVES-GGGLVQPGASLRLSCAASGFTF--G--DYAMSWVRQAPGKGLE---WV
SYISSA--SS-TIYYADSVKGRFTISRDNAKNSLYLQ------MN-SLKTEDTAVYYCTR
-------
>V101RF-AQIB01153501.1-ighv |(18760, 19071)|2.9454900387|(0.986,0.964,0.998)|1
-VQCEVQLVES-GGGVVQPEGSLRLSCAASRFTF--D--DYAMSWVRQAPGKGLE---WV
SVISWT--RR-STYYADSVKGRFTISRDNTKNSLYLQ------MD-RLRAEDTALYYCAK
D------
>V102RF-AQIB01153504.1-ighv |(6983, 7290)|2.48308050934|(0.788,0.884,0.882)|1
-AHSQVQLVLS-RAEVEKPGASVKVSCKASGYTF--T--SYFMQWVGQAPGQGRE---WM
GWVYLGN--G-NTNYEQKFQGRVTITRDVSTSTTYME------LS-TLRSEDMAVYYCA-
-------
>V103RF-AQIB01153506.1-ighv |(6406, 6713)|2.48308050934|(0.788,0.884,0.882)|1
-AHSQVQLVLS-RAEVEKPGASVKVSCKASGYTF--T--SYFMQWVGQAPGQGRE---WM
GWVYLGN--G-NTNYEQKFQGRVTITRDVSTSTTYME------LS-TLRSEDMAVYYCA-
-------
>V104RF-AQIB01153507.1-ighv |(14778, 15088)|2.59964641897|(0.976,0.984,0.781)|1
-ALSQVQLQES-GPGVVKPSETLSLTCAVSGYSI--SSG-YYWGWIRQPPGKGLE---WI
GSIYGSG--G-SNYLNPSLKSRVTLSVDTSKNQFSLK------LS-SVTATDTAVYYCA-
-------
>V105RF-AQIB01153507.1-ighv |(24714, 25023)|3.0|(1.000,1.000,1.000)|1
-VQCEVQLVES-GGGLVQPGGSLRLSCAASGFTF--S--SYWMHWVRQAPGKGLE---WV
SLINSDG--G-STRYADSVKGRFTISSENAKNSLYLQ------MN-SLRAEDTAVYYCAR
-------
>V106RF-AQIB01153507.1-ighv |(32453, 32768)|2.99899200002|(0.999,1.000,1.000)|1
-VQCEVQLVQS-GGGLVQPGGSLRLSCAASGFTF--S--EYAMAWVRQASGKGLE---WV
GRIRSKSNNY-GTAYAASVKGSFTISRDDSKNTLYLQ------MS-SLKTEDTAVYYCTR
-------
>V107RF-AQIB01153507.1-ighv |(42168, 42483)|2.97195641525|(0.994,1.000,0.979)|1
-VQCEVQLVES-GGGLVQPGGSLKLSCAASGFTF--S--NYYMDWVRQAPGKGLE---WV
GRIRNKANSH-TTEYAASVKDRFTISRDDSKNTLYLQ------MS-GLKTEDKAVYYCAR
-------
>V108RF-AQIB01153509.1-ighv |(6082, 6394)|2.99799200002|(1.000,0.999,0.999)|1
-VQCEVQLVES-GAGLVQPGGSLRLSCAASGFTF--S--DYYMDWVRQAPGKGLE---WV
SRISSGS-GS-STYYPDSVKGRFTISRDNSKNTLYLQ------MN-SLRAEDTAVYYCAR
-------
>V109RF-AQIB01153509.1-ighv |(13578, 13893)|2.96037047288|(0.997,0.967,1.000)|1
-VQCEVQLVES-GGGLVQPGGSLRLSCAASGFTF--S--NHYMHWVRQAPGKGQE---WV
GFIRNKANGG-TAEYAASVKGRFTISRDDSKSITSLQ------MN-SLKTEDTAVYYCTR
-------
>V110RF-AQIB01153509.1-ighv |(29997, 30306)|3.0|(1.000,1.000,1.000)|1
-VQCEVQLVES-GGGLVQPGGSLRLSCAASGFTF--G--DYDMSWVRQAPGKGLE---WV
SFISY--TGK-TTYYADSVKGRFTISRDNAKNSLSLQ------MN-SLRAEDTAVYYCTR
-------
>V112RF-AQIB01153509.1-ighv |(45356, 45665)|2.95020796184|(0.999,0.974,0.981)|1
-AHSEVQLVQS-GAEVKKPGASVNVSCKASGYTF--T--DYYLHWVRQAPGKGLE---WM
GRIDPEN--G-ESKYAQKFQDRLTMTADTSTDTAYME------LS-SLRSEDTAVYYCAT
-------
>V113RF-AQIB01153511.1-ighv |(7980, 8295)|2.99799600001|(0.999,0.999,1.000)|1
-VQCEVQLVES-GRGLVQPGGSLRLSCAVSGFTF--S--DHYMSWVREAPGKGLE---WV
GFMRNKANGG-RTEYAASVKGRFTISRDDSKSIASLQ------MS-SLKTEDTAVYYCAR
-------
>V114RF-AQIB01153511.1-ighv |(11094, 11404)|2.98851611711|(1.000,1.000,0.989)|1
-VQCEVQLVES-GGGLVQPGGSLRLSCVASGFTF--S--DHYMDWVRQAPGKGLE---WV
SSISTG-SGS-TTLYPDSVKGRFTISRDNAKNTLYLQ------MN-SLRADDTAVYYCA-
-------
>V115RF-AQIB01153511.1-ighv |(40798, 41107)|2.9969280013|(0.997,1.000,1.000)|1
-VQCEVQLVES-GGGLAKPGGSLRLSCAASGFTF--S--SYGMHWVRQAPGKGLE---WI
SAINSG--GS-NTWYTDSVKGRFTISRDNSKNTLSLQ------MN-SLRAEDTAVYYCAK
-------
>V116RF-AQIB01153517.1-ighv |(601, 913)|2.9659815877|(0.999,0.978,0.991)|1
-VLSQVQLQQW-GGGLVKPSETLSLTCAVYGGSI--S-GYYYWSWIRQPPGKGLE---WI
GNIDGNS--G-STNYNPSLKSRVTISKDTSKNQFSLK------LS-SVTAADTAVYYCAR
-------
>V117RF-AQIB01153522.1-ighv |(387, 699)|2.76153172754|(0.913,0.895,0.966)|1
-VLSQVQLQES-GPGLLKPSETLSLTCAVSGGSI--SGG-YGWGWIRQPPGKGLE---WI
GSIYTSS--G-NTYYNPSLKSRVTISTDTSNNQFSLK------LN-SVTAADTAVYYCAR
-------
>V118RF-AQIB01153537.1-ighv |(1707, 2018)|2.98432022844|(0.999,1.000,0.986)|1
-VQCEVQLVES-GGGVVQPGGSLRLSCAASGFTF--D--DYGMHWVRQAPGKGLE---WV
SDISWD--GD-STYYADSVKGRFTISRDDAKNSLYLQ------MD-SLRAEDTALYYCAK
D------
>V119RF-AQIB01153538.1-ighv |(4311, 4620)|2.991900005|(0.999,0.999,0.994)|1
-AQSQVQLVQS-GAEVKKPGASVKLSCKASGYTF--T--SYNINWVRQAPGQVLE---WM
GWINPSN--G-NTGYAQKFQGRVTMTRDTSTSTAYME------LS-SLISEDTAVYYCAR
-------
>V120RF-AQIB01153538.1-ighv |(21429, 21738)|2.46948052764|(0.949,0.911,0.755)|1
-AHSQVQLVQS-GVEVKKPGASVKVSCKASGYTF--S--IYAISWVRQAPGQGLE---WM
GAIIPLV--G-ITNYAQKFQGRVTITADTSTSTAYME------LS-SLRSEDTAVYYCAR
-------
>V121RF-AQIB01153538.1-ighv |(31031, 31340)|2.44339857711|(0.935,0.762,0.874)|1
-AHSQVQLVQS-GAEGKKPGSSVKVSCKASGYTF--T--NSAVQWVRQSPEQGLE---WI
GVIIIGN--D-NTGYAQKFQGRVTITMDVSMSTAYVE------LS-SLRSEDMAVYYCAA
-------
>V122RF-AQIB01153541.1-ighv |(19819, 20128)|2.51335577262|(0.903,0.750,0.965)|1
-AHSQEQLVQS-GAEVKKPGASVKVSCKASGYIF--T--GYIISWLRQAPGQGFE---WM
GGINPSD--G-STSYAQKFQGRVTMTRDTSTSTVYVE------LS-SLRSEDTAVYYCAA
-------
>V123RF-AQIB01153541.1-ighv |(23910, 24219)|2.95426883377|(0.987,0.970,0.999)|1
-AHSEMQLVQS-EAEVKKPGASVKVSCKVSGYTF--T--YPYLHWVRQTPGQGLE---WM
GWITPYN--G-NTNYAQKFQDRVTITRDRSMSTAYME------LS-SLRSEDTAVYYCAR
-------
>V124RF-AQIB01153543.1-ighv |(7057, 7368)|2.99593600205|(1.000,1.000,0.996)|1
-VQCEVQLVES-GGGVVQPGGSLRLSCAASGFTF--D--DYAMGWVRQAPGKGLE---WV
SGISW--NSG-STGYADSVKGRFTISRDNAKNSLYLQ------MN-RLRAEDTALYYCAK
D------
>V125RF-AQIB01153550.1-ighv |(2975, 3287)|2.75105988529|(0.876,0.968,1.000)|1
-VLSQVQLQES-GPGLVKPSETLSLTCAVSGYSI--SS-AYDWSWIRQPPGKGLE---LI
GYIYGNS--A-STSYNPSLKSRVTISKDTSKNQFSLK------LS-SVTAADTAVYYCAR
-------
>V126RF-AQIB01153553.1-ighv |(7961, 8270)|2.99598000014|(0.999,0.997,1.000)|1
-VQGEVQLVES-GGGLAKPGGSLRLSCSASGFTF--S--DYYMHWVRQASGKGLE---WV
SRINTG--GG-STWYADSVKGRFTISRENAKNTLYLQ------MD-SLRAEDTAVYYCAR
-------
>V127RF-AQIB01153553.1-ighv |(15671, 15986)|2.97694052476|(0.997,1.000,0.981)|1
-VKCEAQLMES-GGGLVQPGGSLRLSCAASGFTF--S--DHYMQWVRQAPGKGLE---WV
GLIRNKVDGE-TTDYAASVKGRVTISRDESKSITYLQ------MN-NLKTEDTAVYYCAR
-------
>V128RF-AQIB01153553.1-ighv |(22330, 22639)|2.94082233718|(0.999,0.951,1.000)|1
-VQGEVQLVES-GGGLVQPGGSLRLSCAASGFTF--S--SYAMHWARQAPGKGLE---WV
SYISSG--GG-NTYYADSVKGRFTISRDNSKNTLSLQ------MN-SLRAEDTAVYYCAR
-------
>V129RF-AQIB01153555.1-ighv |(4669, 4978)|2.23814657075|(0.970,0.976,0.642)|1
-VCAEVQLVQS-GAEVKRPGESLRISCKTSGYSF--T--SSWISWVRQMPGKGLE---WM
GRIYPGD--S-DTEYSPSFQGQVTISADKSISTTYLQ------WS-SLKASDTATYYCAK
-------
>V130RF-AQIB01153555.1-ighv |(23903, 24218)|2.99899200002|(0.999,1.000,1.000)|1
-VQCEVQLVES-GGGLVQPGGSLRLSCAASGFTF--S--DHYMDWVRQAPGKGLK---WV
GRIRNKANSY-TTEYAASVKGRFTISRDDSKNTLYLQ------MS-SLKTEDTAVYYCTR
-------
>V131RF-AQIB01153555.1-ighv |(39959, 40271)|2.25689975143|(0.992,0.994,0.648)|1
-VQCEVQLVES-GGGLVQPEGSLRLSCVASGFTF--S--NYDMAWVRQAPGKGLE---WV
SRISSP-SGS-STYYPDSVKGRFTISRENAKNTLYLQ------MN-SLRAEDTAVYYCAR
-------
>V132RF-AQIB01153556.1-ighv |(2509, 2815)|2.21728654707|(0.857,0.628,0.999)|1
-VQCEVQLVEY-GGGLVQPGGSLRHSC---GFTF--S--DHYMSWVHPAPGKGLE---WV
GFMRNKANGG-RTEYAASVKGRFTISRDDSKSIASLQ------MS-SLNTEDTVLYYCAR
-------
>V133RF-AQIB01153557.1-ighv |(2988, 3297)|3.0|(1.000,1.000,1.000)|1
-VQCEVQLVES-GGGLVQPGGSLRLSCAASGFTF--S--DYWMYWVRQAPGKGLE---WV
SRIS-G-SSS-STYYPDSVKGRFTISRDNAKNTLYLQ------MD-SLRAEDTAVYYCAR
-------
>V134RF-AQIB01153557.1-ighv |(15135, 15441)|2.98153608204|(0.996,0.986,1.000)|1
-VQCEVQLVES-GGGLVQPGGTLRLSCAASGFTF--G--NSDLIWIRQAPGKGLE---WV
SYISS---GG-STYYSDSVKGRFTISRENAKNTLYLQ------MS-SLRVEDTAVYYCVR
-------
>V135RF-AQIB01153558.1-ighv |(4802, 5117)|2.99696400065|(1.000,1.000,0.997)|1
-VQCEVQLVES-GGGLVQPGGSLRLSCAASGFTF--S--NSWMSWVRQAPGKGLE---WV
ARIKSKADGG-TAEYAASVKGRFTISRDDSKNTLYLQ------MN-SLKTEDTAVYYCTI
-------
>V136RF-AQIB01153561.1-ighv |(995, 1304)|2.59150062476|(0.950,0.882,0.832)|1
-VQCEVQPVES-GGGLVQPGGSLRLSCTASGFTF--S--STRMNWIRQSPGKRLE---WV
ADIKYD--GS-EKYYVDSVKGRFTISRDNAKNSLYLQ------MN-SLRAEDTAVYYCVR
-------
>V137RF-AQIB01153564.1-ighv |(5745, 6054)|2.33930992553|(0.965,0.914,0.706)|1
-VSAEVQLVQS-GAEVKRPGESLKISCKTSGYSF--T--SYWISWVRQIPGKGLE---WI
GTIYPSD--S-DTRYSPSFQGQVTISADKSISTAYLQ------WS-SLKASDTATYYCAK
-------
>V138RF-AQIB01153565.1-ighv |(7316, 7625)|2.6109574184|(0.965,0.954,0.798)|1
-VCAEVQLVQS-GAEVKKPGESLKISCKTSGYSF--T--SYWISWVRQIPGKGLE---WI
GAIDPSD--S-DTRYSPSFQGQVTISADKSISTAYLQ------WS-SLKSSDTATYYCAK
-------
>V139RF-AQIB01153566.1-ighv |(30566, 30881)|2.99371202074|(0.994,1.000,1.000)|1
-VQCEVQLVES-GGGLVQPGGTLRLSCAASGFTF--S--NYWMDWVRQAPGKGLE---WV
GFIKNKADGG-TAEYAASVKGRFTISRDDSKNTLYLQ------MN-SLKTEDTAVYYCTR
-------
>V140RF-AQIB01156901.1-igkv |(3348, 3648)|2.99899600001|(1.000,0.999,1.000)|1
-AKCDIQMTQSPSSLSASVGDKVTITCQASQSI------SSWLAWYQQKPGKAPK---LL
IYK------A-SSLESG-VPSRFSGSG--SGTDFTLT------IS-SLQPEDFATYYCQQ
HNSAP--
>V141RF-AQIB01158310.1-igkv |(1186, 1501)|2.95149304411|(0.992,0.988,0.973)|1
-TSGDIVMTQTPLSLPVTPGEPASISCRSSQSLLHS-NGYTYLNWYLQKPGQSPL---LL
IYL------V-SNRASG-VPDRFSGSG--SGTDFTLK------IS-RVEAEDVGVYYCMQ
DIKLP--
>V144RF-AQIB01162311.1-trbv |(11768, 12065)|2.98470402421|(0.999,0.994,0.992)|1
--SLDTAVSQTPKYLVTQMGKKVSLKCEQNL-G------HDTMYWYKQDSKKLLK---IM
FSYNN-K--E-LTIN-ETVSTRFSPE-SPDKAHLILH------IK-SLELGDSAVYFCAS
SQ-----
>V145RF-AQIB01162312.1-trbv |(4219, 4516)|2.994900005|(1.000,1.000,0.995)|1
--PTDTGVTQTPKHLVMGMTNKKSLKCEQHL-G------HNAMYWYKQKAKKPPE---LM
FVYQY-E--K-LSIN-ESVPSRFSPE-CSKSSLLYLH------LQ-ALQPEDSALYLCAS
SQ-----
>V147RF-AQIB01162312.1-trbv |(18644, 18941)|2.43340721488|(0.972,0.952,0.726)|1
--PLDTAVFQTPKYLVTQMGKKVSLKCEQNL-G------HDTMYWYKQDSKKLLK---IM
FIYSN-E--E-PILN-ETVPNRFSPE-SLGKAHLNLH------IK-PVELGDSAVYFCAS
SQ-----
>V148RF-AQIB01162312.1-trbv |(22989, 23286)|2.99280401921|(1.000,1.000,0.993)|1
--PTDTGVTQTPKHLVMGMTNKKSLKCEQHL-G------HNAMYWYKQKAKKPPE---LM
FVYNY-E--K-LSIN-ESVPSRFSPE-CSKSSLLYLH------LR-ALQPEDSALYLCAS
SQ-----
>V149RF-AQIB01162312.1-trbv |(33931, 34221)|2.6455028039|(0.926,0.859,0.885)|1
----EAGVTQTPRSLIKMRGQQVTLSCSPIS-G------HRSVSWYQQTPGQGLQ---LL
FEYFS-E--T-QRQKGN-FPNRFSGR-QFSNSHSEMN------VS-TLELGDSALYLCAS
SL-----
>V150RF-AQIB01162312.1-trbv |(41443, 41740)|2.99496000066|(0.999,0.996,1.000)|1
--PANADVTQSPKFQILKTGQNMTLKCAQDM-N------HNSMYWYRQDPGMGLR---LI
HYSAT-E--D-TTDTGE-VPDGYSVS-RLNKKEFLLR------LE-SAAPSQTSVYFCAS
SE-----
>V151RF-AQIB01162312.1-trbv |(55583, 55896)|2.98886400565|(0.997,1.000,0.992)|1
--SLDTAVSQTPKYLVTQTGKNESLKCEQNL-G------HNAMYWYKQDSKKLLK---IM
FIYSN-K--E-PVLN-ETVPNRFSPK-SPDKAHLNLY------IT-SVELGDSAVYFCAS
SQDTALQ
>V152RF-AQIB01162312.1-trbv |(59013, 59310)|2.99193200206|(0.999,0.998,0.995)|1
--PMETGVTQTPRHLVMGMTNKKSLKCEQHL-G------HNAMYWYKQKAKKPPE---LM
FIYNF-K--E-RAEN-NSVPSRFSPE-CPDSSLLYLH------LR-ALQPEDSALYLCAS
SQ-----
>V153RF-AQIB01162312.1-trbv |(70730, 71027)|2.98594800078|(0.995,0.998,0.993)|1
--PVNAGVTQTPKFQILKTGQNMTLKCAQDM-N------HDRMYWYRQDTGMGLR---LI
HYSVG-E--G-NTEKGE-VPSGYNAS-RLNKKDFLLR------LE-LAAPSQTSIYFCAS
SE-----
>V154RF-AQIB01162312.1-trbv |(74325, 74625)|2.83176541579|(0.959,0.923,0.955)|1
--HTDAGVSQSPRNKVTEEGKDVVLRCDPIS-G------HIALYWYRQSLGKGLE---FL
IFFQG-N--D-APDKSGLPSGRFSAE-RLEGSVSTLK------IQ-RTQQGDSAVYLCAS
SS-----
>V155RF-AQIB01162313.1-trbv |(10114, 10411)|2.99192000218|(0.998,0.994,1.000)|1
--HTGAGVSQSPSNKVTE-KGNVALRCDPIS-G------HAVLYWYRQNLGQGLE---FL
IYFQG-T--S-AVDDSGLRSDRFSAT-RPEGSVSTLK------IQ-RTEQGDSATYFCAS
SL-----
>V156RF-AQIB01162313.1-trbv |(15115, 15427)|2.36230815269|(0.879,0.734,0.837)|1
--PVDTGVTQSPTHLIKTRGQQVTLRCSPIS-G------HTSVSWYQQAPGQGPQ---FI
FKYAN-E--L-RTSEGN-FPHRFSGR-QFRDYHSEMN------VS-ALELGDSALYLCAS
SLAQPGR
>V157RF-AQIB01162313.1-trbv |(17798, 18094)|2.96308424741|(0.998,0.997,0.971)|1
--SVDSGVTQTPKHLITAIGQQVTLRCSPRS-G------DLSVYWYQQSLGQGLQ---FL
IQYYN-G--A-ERAKGN-ILERFSAQ-QFPDLHSELN------LS-SLELGDSALYFCAS
SL-----
>V161RF-AQIB01162317.1-trbv |(23070, 23367)|2.99194800078|(0.997,1.000,0.995)|1
--PVNAGVTQTPKFQVLKTGQSMTLQCAQDM-N------HDCMYWYRQDPGMGLR---LI
HYSFG-K--G-STDKGE-VPDGYNVT-RSSTEDFTLR------LE-SAAPSQTSVYFCAS
SY-----
>V163RF-AQIB01162317.1-trbv |(35256, 35552)|2.95410021834|(0.992,0.980,0.983)|1
--PVQAGVTQSPTHLIKTRGQQVTLRCSPIS-G------HSSVYWYQQALGQGLQ---FI
LSYDE-E--E-ERDRGT-FPHRFSGH-QFPNYSSELN------VN-ASEVGDSALYLCAS
SL-----
>V164RF-AQIB01162317.1-trbv |(46598, 46898)|2.98686400565|(0.995,0.992,1.000)|1
--HTGAGVSQSPSYKVTKRGQDVALRCDPIS-G------HVALYWYRRTLGQGPE---LL
TYFQN-D--A-QPDKSGLPSDRFSAE-RPEGSVSTLK------IQ-RTQQGDSAVYLCAS
SL-----
>V165RF-AQIB01162318.1-trbv |(2955, 3251)|2.99396400065|(0.999,0.996,0.999)|1
----NAGVTQTPKFQVLKTGQSMTVQCAQDM-N------HDYMFWYRQDPGMGLR---LI
HYSGA-A--G-TTDKGE-VPSGYNVS-RLNTEDFPLR------LE-SAAPSQTSVYFCAS
SYST---
>V166RF-AQIB01162319.1-trbv |(8580, 8876)|2.26801223062|(0.989,0.923,0.684)|1
--PVDAGVTQSPTHLIKMRGQQVTLRCSPIS-G------HNTVSWYQQALGQGPQ---FI
FQYYE-K--E-EREKGN-FPGRFSGH-QFPNYSSELN------VN-ASEMGDSALYLCAS
SL-----
>V168RF-AQIB01162319.1-trbv |(25283, 25579)|2.35285902909|(0.994,0.994,0.684)|1
--PVDAGVTQSPTHLIKTRGQQVTLRCSPIS-G------HTSVSWYQQALGQGPQ---LI
FQYYE-K--E-EREKGN-FPGRFSGH-QFPNYSSELN------VN-ASEMGDSALYLCAS
SL-----
>V169RF-AQIB01162319.1-trbv |(33229, 33529)|2.35884544923|(0.982,0.717,0.920)|1
--HTGAGVSQSPRYRVTKRGQEVAFRCDPIS-G------HEYLYWYQQAPGQGPE---FL
TYFQN-D--A-QLDKSGLPSGRFSAE-RPEGSVSTLK------IQ-RTQQGDSAMYLCAS
SL-----
>V172RF-AQIB01162320.1-trbv |(3376, 3672)|2.99288400513|(1.000,0.998,0.995)|1
--PVDTGVTQSPTHLIKMRGQQVTLRCSPIS-G------HSSVYWYQQALGQGPQ---FI
FQYYE-K--E-ERGRGN-FPDRFSGH-QFPNYSSELN------VS-ALLLGDSALYLCAS
SL-----
>V173RF-AQIB01162320.1-trbv |(10674, 10965)|2.97470483945|(0.998,0.998,0.980)|1
----NAGVTQTPKFQVLKTGQSMIVQCAQNM-N------HDYMFWYRQDPGMGLR---LI
YYSVT-A--G-ITTKGE-VPNGYNVS-RRNTEDFLLR------LE-SAALSQTSVYFCAS
SY-----
>V174RF-AQIB01162320.1-trbv |(14920, 15220)|2.99194800078|(0.997,1.000,0.995)|1
--HTGAGVSQSPRYKVIKKGQDVALRCDPIS-G------HAALYWYQQALGQGPE---FL
TYFNY-K--D-QPDKSGLPNNRFSAE-RPEGSFSTLT------IQ-RTEQQDSAVYLCAS
SL-----
>V175RF-AQIB01162320.1-trbv |(23602, 23892)|2.42094020928|(0.952,0.735,0.912)|1
----DAGVTQSPMHLIKTRGQQVTLRCFPIS-G------HNTVSWYQQTLGQGPQ---LI
FQYYR-E--E-ERGKGN-FPDRFSGR-QFPNYSSELN------VS-ALLLGDSALYLCAS
SL-----
>V176RF-AQIB01162320.1-trbv |(46876, 47173)|2.98660004313|(0.991,0.999,0.997)|1
--HMDARITQSPRHKITETGTPVTLRCHQTE-N------HRYMYWYRQDLGHGLR---LI
HYSYG-V--E-DTDKVE-VSDGYSVS-RSKTEDFLLT------LE-SATRSQTSVYLCAS
SE-----
>V178RF-AQIB01162320.1-trbv |(63466, 63766)|2.54984324547|(0.926,0.787,0.912)|1
--HTDAGVIQSPRHEVTEMGKEVTLRCEPIS-G------HNSLFWYRQTMMRGLE---FL
IYFNN-K--S-PIDDSGMPKDRFSAK-MPNASFSTLK------IQ-PSEPRDSAVYFCAS
SL-----
>V179RF-AQIB01162320.1-trbv |(66748, 67048)|2.55768548976|(0.878,0.814,0.882)|1
--HTDAGVIQSPRHEVIEMGKEVTLRCEPIS-G------HTYLFWYRQTMMRGLE---FL
IYFNN-K--S-PIDDSGMPKDRFSAE-MPEASFSILK------IQ-PSEPRDSAVYFCAS
SL-----
>V180RF-AQIB01162320.1-trbv |(82427, 82727)|2.28236288146|(0.852,0.934,0.660)|1
--LIDAGVTQTPRHKVTEMGQEVTMRCQPIL-G------HNTIFWYRQTMMRGLE---FL
IYFNN-K--S-PIDDSGMPKDRFSAE-MPNASLATLK------IQ-PSEPRDSAVYLCAS
GL-----
>V183RF-AQIB01162320.1-trbv |(99411, 99711)|2.50977613807|(0.947,0.872,0.798)|1
--SPGEEVTQTPKHLVKGEGQKAKLYCAPIT-G------HSYVFWYQQVLRKEFK---FL
ISFQN-K--N-VFDETGMPKERFSAK-CPPNSPCSLE------IQ-ATKLKDSAVYFCAS
SQ-----
>V184RF-AQIB01162321.1-trbv |(2362, 2659)|2.98974003277|(0.999,1.000,0.991)|1
--TVDGGITQSPKYLFRKEGQNVTLSCEQNL-N------HDAMYWYRQDPGQGLR---LI
YYSQT-V--N-DIQKGD-TAEGYSVS-RERKQSFPLT------VT-SAQRNPTAFYLCAS
SI-----
>V185RF-AQIB01162321.1-trbv |(20388, 20688)|2.93414531208|(0.988,0.968,0.980)|1
--STDTKVTQRPRLLVKANEQKAKMDCVPVK-G------HSYVYWYRKKLDEELK---FL
IYFQN-E--E-IIQKAEIINERFSAQ-CPQNSPCTLE------IQ-STESGDAALYFCAS
SK-----
>V186RF-AQIB01162321.1-trbv |(29352, 29657)|2.96950011724|(0.993,0.995,0.982)|1
--SFHAEVTQTPGYLVKGKGQKTKMDCTPEK-G------HTFVYWYQQNQNKEFT---FL
ISFQN-E--Q-VLQETELHKKRFSSQ-CPKNPPCSLE------IP-SSEPGDTALYLCAS
SQST---
>V187RF-AQIB01162321.1-trbv |(41537, 41835)|2.89216849053|(0.988,0.989,0.929)|1
--SMDADVTQTPRNKIAKTGKRIMLECSQTK-S------HDRMYWYRQDPGLGLR---LI
YYSFD-V--K-DINKGE-ISDGYNVS-RQEQAKFSLS------LE-SATPNQTALYFCAT
SD-----
>V188RF-AQIB01162321.1-trbv |(50021, 50318)|2.98693600205|(0.997,0.993,0.997)|1
--LMEADIYQNPRHCVIGTGKKITLECSQTM-G------HDKMYWYQQDPGMELH---LI
HYSYG-V--N-STERGD-FSSESTVS-RIRIEHFPLT------LE-SASPSHTSQYLCAS
SE-----
>V189RF-AQIB01162321.1-trbv |(81250, 81547)|2.98164403777|(0.995,1.000,0.987)|1
--PLEAQVTQNPRYLITVTGKKLTVTCSQNM-N------HEYMSWYRQDPGLGLR---QI
YYSIN-V--E-MVDKGD-IPEGYIVS-RKEKRNFLLI------LE-SPSPSQTSLYFCAS
SL-----
>V190RF-AQIB01162321.1-trbv |(86583, 86890)|2.97320030738|(0.986,1.000,0.988)|1
--LVDVKVTQSSRYLIKRTGEKVFLECVQDM-D------HERMFWYRQDPGLGLR---LI
YFSYD-V--K-LNEKGD-IPEGYNVS-REKKERFSLI------LG-FASTNQTSMYLCAS
SLSTA--
>V191RF-AQIB01162321.1-trbv |(106451, 106754)|2.99696400065|(1.000,0.997,1.000)|1
-SVFSAVVSQKPSRDVCQRGTSVTIQCQVDS-Q------VTMMFWYRQQPGQSMT---LI
ATANQGS--E-ATYESGFVIDKFPIS-RPNLTFSTLT------VS-NTSPEDSSIYLCSV
E------
>V192RF-AQIB01086294.1-ighv |(20916, 21222)|2.35237279133|(0.747,0.943,0.836)|-1
-VRCEVQRVES-GGGLVQPGGSLRLSCAASGFTI--S--SSWMNWDFQAPGKGLE---CV
SHISSV---G-STDYPDSIKGQFTISRDNTKNTLYVQ------MN-SLRAEDMAVYYCAR
-------
>V193RF-AQIB01128636.1-trav |(12150, 12438)|2.97360004313|(0.992,0.984,0.998)|-1
-LSGELKVGQNPLFLSTQEGKNDTIYCNYSTAS-------DRLYWYRQDPGKSLE---SL
FVLLSNG--A-VK-----QEGRFMASLDTKARLSTLH------IT-AALQDLSATYFCAV
-------
>V195RF-AQIB01128637.1-trdv |(70372, 70673)|2.85452791144|(0.996,0.952,0.931)|-1
-SGMAQTVTQSQPEMSVREAETVTLSCTYDTSE-----SDYYLFWYQQPPSRQMT---LI
IRQEAYK--Q-Q----NATENRFSVNFQKAAKSFSLK------IS-DSQLGDAAMYFCAF
M------
>V196RF-AQIB01128637.1-trav |(79553, 79853)|2.93721046559|(0.992,0.979,0.969)|-1
-SGMAQTVTQSQPEMSVREAETVTLSCTYDTSE-----SYYYLFWYKQPPSRQMT---LI
IRQEAYK--Q-Q----NATENRFSVNFQKAAKSFSLK------IS-DSQLGDAARYFCAY
R------
>V202RF-AQIB01128642.1-trav |(7440, 7727)|2.99498400013|(0.999,0.997,0.999)|-1
-LSGEDQVTQSPEALSLQEGESSSLNCSYTVSG------LRGLFWYRQDPGKGPE---FL
FSLYSAG--E-EK-----EKERLKATLTKK--ESFLH------IT-GPKPEDSATYLCAV
Q------
>V203RF-AQIB01128642.1-trav |(19364, 19663)|2.22413031007|(0.851,0.632,0.985)|-1
-VSGKQEVTQIPAALSVPEGDNLVLNCSFTDSA------IYNLQWFRQDPGKGLT---SL
LLIQSSQ--R-EQ-----TSGRLNASLDKSSGRSTLY------IT-ASQPTDSATYLCAV
RHS----
>V204RF-AQIB01128643.1-trav |(8686, 8977)|2.98996000066|(0.998,0.995,0.997)|-1
-RTNGDSVTQTEGPVTLPERAALTLNCTYQTSY------SAFIFWYVQYPKKEPE---LL
LKSS-EN--Q--E--T--NSRGFQASHVKSDSSFHLE------KP-SVQLSDSAVYYCVL
R------
>V205RF-AQIB01128643.1-trav |(11902, 12205)|2.9781523093|(0.999,0.995,0.985)|-1
-SSMAQKVTQAQTEISVVEKEDVTLDCVYETRE-----TTYYLFWYKQPPSGELV---FL
IRQNSFN--E-Q----NEINGRYSSNFQKSTSSFNLT------IT-ASQVMDSAVYFCAL
NE-----
>V207RF-AQIB01128644.1-trav |(158071, 158361)|2.98896000066|(0.995,0.996,0.998)|-1
-MSRGDDVEQSL-FLSVREGDISVINCTYTDSS------STYLYWYKQEPGAGLQ---LL
IYILSNT--D-LK-----QDQRLTVLLNKKDKHLSLR------IA-DTQTGDSAIYFCAE
S------
>V209RF-AQIB01128644.1-trav |(203408, 203702)|2.99899600001|(1.000,1.000,0.999)|-1
-GINGDSVVQTEGQVLLSEGNSLIVNCSYESTQ------YPSLFWYVQYPGEGPQ---LL
LKAMKDN--D--K--E--SNKGFEATYRKETTSFHLE------KD-SVQESDSAVYFCAL
S------
>V210RF-AQIB01128644.1-trav |(216592, 216885)|2.96537212748|(0.983,0.989,0.994)|-1
-GSGKNQVEQSPQSLIILEGKNCTLQCNYTVSP------FSNLRWYKQDTGKGLI---SL
TIMTFSD--N-TK-----SNGRYTATLDADTKQSSLY------IT-AAQLSDSASYICVV
S------
>V211RF-AQIB01128644.1-trav |(232171, 232464)|2.99598000014|(0.999,0.997,1.000)|-1
VWGQQKEVEQNPGPLSVPEGATASLNCTYSNSA------FQYFMWYRQYSRKGPQ---LL
IYIYSSG--N-K------EDGRFTAQVDKSSKYISLF------IR-DSQPSDSATYFCAM
S------
>V212RF-AQIB01128644.1-trav |(237634, 237931)|2.30032859169|(0.959,0.906,0.693)|-1
-GTRAQSVTQLDSQVSVSEGVPVLLRCNYSSSF------PPNLFWYVQYPNQGLQ---LL
LKYISGT--A-LV--K--GINGFKAEFKKSETSFHLT------KA-SAHVSDAAEYFCAV
S------
>V213RF-AQIB01128644.1-trav |(243150, 243447)|3.0|(1.000,1.000,1.000)|-1
-TARAQSVTQPDIHITVSEGASLELRCNYSYGA------TPSLFWYVQSPGQGLQ---LL
LKYFSGD--T-LV--Q--GIKGFEAEFKRSQYSFNLR------KP-SVHWSDAAEYFCAA
G------
>V214RF-AQIB01128644.1-trav |(257060, 257353)|3.0|(1.000,1.000,1.000)|-1
-VSRGESVGLHLPTVSVQEGDNSVINCTYSDSA------SDYFLWYKQESGKGPQ---SI
IDIRSNM--A-KR-----QGQRLTVLLNKTMKHLSLQ------IA-ATEPGDSAVYFCAE
N------
>V215RF-AQIB01128644.1-trav |(262905, 263206)|2.97368883957|(0.997,0.999,0.979)|-1
-SGIAQKITQTQPAMFVQEKEAVTLDCTYDTSD-----QSYGLFWYKQPSSGEMI---FL
IRQESYD--K-Q----NATEGRYSLNFQKARKSVNLV------IS-ASQVEDSAMYFCAM
R------
>V216RF-AQIB01128644.1-trav |(280831, 281125)|3.0|(1.000,1.000,1.000)|-1
-RTRGDSVTQMEGPVTLSERAFLTINCTYTATG------YPSLFWYVQYPGEGPQ---LL
LKAVKTD--E--K--G--SNKGFEATYRKETTSFHLK------KD-SVQESDSAVYFCAL
S------
>V217RF-AQIB01128644.1-trav |(305369, 305662)|3.0|(1.000,1.000,1.000)|-1
VWSQQKEVEQNPGPLSVPEGATASLNCTYSNSA------FQYFMWYRQYSRKGPQ---LL
IYIYSSG--N-K------EDGRFTAQVDKSSKYISLF------IR-DSQPSDSATYFCAM
S------
>V218RF-AQIB01128644.1-trav |(340098, 340385)|2.99593600205|(1.000,1.000,0.996)|-1
--VNSQQGEEDPQTLSIQEGENATMNCSYKTS-------INNLQWYRQDSGRSLV---QL
TLIRSNE--R-QK-----NSGRLRVTLDTSKKSSSLL------IT-ASRAADTASYFCAT
D------
>V219RF-AQIB01144282.1-igkv |(6898, 7198)|2.68538866514|(0.986,0.813,1.000)|-1
-AKCDIQLTQSPTFLSASVGDRATIACRASQSI------NKGLAWYQQKPGKVPK---LL
ISY------A-SDLYTG-VPSRFSGSG--SGTDFTLT------IS-SLQPEDAATYYCFQ
YNSYP--
>V220RF-AQIB01144282.1-igkv |(55648, 55948)|2.99899600001|(1.000,0.999,1.000)|-1
-TTGQVILTQSPATLSLSPGERATLSCRASQSV------SSYLAWYQQKPGQAPR---LL
IYS------A-SSRATG-IPDRFSGSG--SGTEFTLT------IS-SLEPEDVGVYHCYQ
YYSGY--
>V222RF-AQIB01144284.1-igkv |(30267, 30585)|2.63677404596|(0.996,0.795,0.995)|-1
-AYGDIVMTQSPDSLAVSLGERVTINCKSSQSLLYSSNNKNYLAWYQQKPGQAPT---LL
ISW------A-STRESG-VPNRFSGSG--SGTDFTLT------IS-GLQAEDVAVYYCQQ
HYSSP--
>V223RF-AQIB01145361.1-ighv |(1895, 2208)|2.988|(0.996,0.996,0.996)|-1
-VQCEVQLVES-GGGLVQPGRFLRLSCAASGFTF--S--NCYMHWAHQAQGRGLE---WV
SLMRKKANSY-ATEYAVSVKDRFTISRDDSKNTLYLQ------MN-SLKTEDTAVYYCA-
-------
>V224RF-AQIB01145362.1-ighv |(14904, 15217)|2.988|(0.996,0.996,0.996)|-1
-VQCEVQLVES-GGGLVQPGRFLRLSCAASGFTF--S--NCYMHWAHQAQGRGLE---WV
SLMRKKANSY-ATEYAVSVKDRFTISRDDSKNTLYLQ------MN-SLKTEDTAVYYCA-
-------
>V225RF-AQIB01146043.1-iglv |(9768, 10077)|2.65174768455|(0.964,0.985,0.803)|-1
-VDSETVVTQE-PSLSVSSGGTVTITCGLSSGSV---STSNYPSWYQQTPGQAPR---TL
IYS------T-NTRPSG-VPDGFSGSI--LGNKAALT------IM-GAQADDESDYYCTL
YMGSGI-
>V226RF-AQIB01153518.1-ighv |(54, 366)|2.95681294446|(0.968,0.998,0.998)|-1
-VLSQVQLQES-GPGLLKPSETLSLTCAVSGGSI--SD-SYRWSWIRQPPGKGLE---WI
GNIYGNS--A-STNYNPSLKSRVTISKDTSKNQFSLK------LS-SVTAADTAVYYCAR
-------
>V227RF-AQIB01158235.1-ighv |(4748, 5060)|2.99594800078|(0.997,0.999,1.000)|-1
-VQCEVQLVES-GGGLVQPGGSLRLSCVASGFTF--S--DHYMHWVRQALGKGLE---WV
SRISSG-SGS-STYYADSVKGRFTISRDNAKNTLYLQ------MN-SLRAEDTAVYYCAR
-------
>V228RF-AQIB01159121.1-igkv |(3373, 3688)|2.61621611554|(0.976,0.838,0.899)|-1
-SSGDVVMTQSPLSLPVTPGQPASISCRSSQSLVH-SDGNTYLSWFQQKPGQPPR---LL
IYQ------V-SNRDSG-VPDRFSGSG--AGTDFTLK------IS-RVEAEDVGVYYCVQ
GTKVP--
>V0RF-CABD02043817.1-igkv |(3028, 3328)|2.99496000066|(0.997,0.998,1.000)|1
-ARCDIQMTQSPSSLSASVGDRVTITCQASQGI------SNNLNWYQQKPEKTPK---LL
IYA------A-SSLQSG-IPSRFSDSG--SGTDYTLT------IS-SLQPEDFATYYCQQ
SDSTP--
>V2RF-CABD02105568.1-trav |(17605, 17902)|2.67059374292|(0.979,0.808,0.995)|1
-GLRAQSVAQPEDQVTVAEGNPLTVKCTYSVSG------NPYLFWYVQYPNKGLK---FL
LKYITGD--N-LV--K--GSYGFEAEFNKSQTSFHLK------KP-SALVSDSALYFCAV
R------
>V3RF-CABD02105570.1-trav |(17984, 18274)|2.97776801985|(0.994,0.997,0.987)|1
-MSRGEDVEQSL-FLSVQEGDSSIIKCTYTDSS------STYLYWYKQEPGAGLQ---LL
MYIFSNM--D-MK-----QDQRLTVLLNKKDKHLSLR------IA-DTQTGDSAIYFCAE
S------
>V4RF-CABD02105575.1-trav |(937, 1225)|2.27122562922|(0.747,0.749,0.998)|1
--VKSQKIEQNSEALNIQEGKTATLTCNYTNYS------PAYLQWCRQDPGRGPV---FL
LLIRENE--K-EK-----RKERLKVTFDTTLKQSLFH------IT-ASQPADSATYLCAL
-------
>V5RF-CABD02105579.1-trav |(4709, 5003)|2.99899600001|(1.000,1.000,0.999)|1
-GINGDSVVQTEGQVLLSEGDSLIVNCSYETTQ------YPSLFWYVQYPGEGPQ---LL
LKAMKAN--D--K--G--RNKGFEATYHKETTSFHLE------KD-SVQESDSAVYFCAL
S------
>V6RF-CABD02105581.1-trav |(5845, 6138)|2.93677285433|(0.993,0.951,1.000)|1
-GSGKNQVEQSPQSLIILEGKNCTLRCNYTVSP------FNNLRWYKQDTGRGPV---SL
TIMTFSE--N-T-----KSNGRYTATLDADTKQSSLH------IT-ASQLSDSASYICVV
S------
>V7RF-CABD02105584.1-trav |(2822, 3110)|3.0|(1.000,1.000,1.000)|1
VWSQRKEVEQDPGPFNVPEGATVAFNCTYSNSA------SQSFFWYRQDCRKEPK---LL
MSVYS----S-G-----NEDGRFTAQLNRASQYISLL------IR-DSQLSDSATYLCAV
-------
>V8RF-CABD02105586.1-trav |(1660, 1957)|2.9829000027|(0.994,0.991,0.998)|1
-GTRAQSVTQLDSHVSVSEGTPVLLRCNYSSSY------SPSLFWYVQHPNKGLQ---LL
LKYTSRA--T-LV--K--GINGFEAEFKKSETSFHLT------KP-SAHMSDAAEYFCAV
S------
>V10RF-CABD02105588.1-trav |(25116, 25407)|2.99067605248|(1.000,1.000,0.991)|1
VWSQQKEVEQNSGPLSVPEGAIASLNCTYSDRR------SQSFFWYRQYSGKSPE---LI
MSIYSNG--D-K------EDGRFTAQLNKASQYVSLL------IR-DSQPSDSATYLCAV
-------
>V11RF-CABD02105589.1-trav |(20536, 20829)|2.97870083945|(0.999,0.981,1.000)|1
-VSRGESEGLHLPTLSVQEGDNSIINCAYSNSA------SDYFIWYKQESGKGPQ---FI
IDIRSNM--D-KR-----QGQRVTVLLNKTVKHLSLQ------IA-ATQPGDSAVYFCAE
N------
>V12RF-CABD02105589.1-trav |(26461, 26764)|2.98270402421|(0.995,0.988,1.000)|1
-PGIAQKITQTQPGMFMQEKEAVTLDCTYDTSD-----QSYGLFWYKQPSSGEMI---FL
IYQGSYD--Q-Q----NATEGRYSLNFQKARKSANLV------IS-ASQLGDSATYFCAM
RE-----
>V13RF-CABD02105590.1-trav |(3574, 3868)|3.0|(1.000,1.000,1.000)|1
-RTRGDSVTQMEGPVTLSEEAFLTINCTYTATG------YPSLFWYVQYPGEGLQ---LL
LKATKAD--D--K--G--SNKGFEATYHKETTSFHLE------KD-SVQASDSAVYFCAL
S------
>V14RF-CABD02105592.1-trav |(17384, 17677)|2.99496000066|(0.999,1.000,0.996)|1
VWSQQKEVEQDPGPLSVPEGAIASLNCTYSNSA------FQYFMWYRQYSRKGPE---LL
MYTYSSG--N-K------EDGRFTVQVDKSSKYISLF------IR-DSQPSDSATYLCAM
S------
>V15RF-CABD02105596.1-trav |(11716, 12003)|3.0|(1.000,1.000,1.000)|1
--VNSQQGEEDPQALSIQEGENATMNCSYKTS-------INNLQWYRQNSGRGLV---HL
ILIRSNE--R-EK-----HSGRLRVTLDTSKKSSSLL------IT-ASRAADTASYFCAT
D------
>V16RF-CABD02105598.1-trdv |(2122, 2425)|2.98286400565|(0.997,0.994,0.992)|1
-SSMAQKVTQTQNEISVVEKEDVTLDCVYETRD-----TTYYLFWYKQPPSGELV---FL
VRQNSFD--E-Q----NEISGRYSWNFQKSTSSFNFT------IT-ASQVVDSAVYFCAL
SE-----
>V17RF-CABD02105602.1-trav |(5884, 6171)|2.99899600001|(1.000,1.000,0.999)|1
-LSGEDQVTQSPEALRLQEGESSSLNCSYTVSG------LRGLFWYRQDPGKGPE---FL
FTLYSAG--E-EK-----EKERLKATLTKK--ESFLH------IT-APKPEDSATYLCAV
Q------
>V18RF-CABD02105602.1-trav |(17805, 18104)|2.93367293132|(0.986,0.958,0.993)|1
-VSSKQEVTQIPAALSVPEGENLVLNCSFTDSA------IYSLQWFRQDPGKGLT---SL
LLIQSSQ--R-EQ-----TSGRLNASLDKSSGHSTLY------IA-ASQPGDSATYLCAV
RHS----
>V20RF-CABD02105611.1-trdv |(4032, 4332)|2.97074467291|(0.998,0.981,0.993)|1
-SSVAQKVTQAQSSVSTSVRKAVTLNCLYETSQW-----SYYIFWYKQLPSKEMI---FL
IRQGSAE--Q-N-----AKSGRYSVNFKKAAKSVALT------IS-ALQLEDSAKYFCAL
WE-----
>V21RF-CABD02105612.1-trav |(1576, 1866)|2.54227860323|(0.971,0.761,0.972)|1
-VNSILNVEQSPQSLHVQEGDSTNFTCSFPSSN------FYALHWYRWETAKSPE---AL
FVMTLNG--D-EK-----KKGRISATLNTKEGYSYLY------IK-GSQPEDSATYLCAF
-------
>V22RF-CABD02105614.1-trav |(2102, 2401)|2.23091390683|(0.957,0.949,0.646)|1
--VNGQQVMQIPQYQHVQEGEDFTTYCNSST-T------LSNIQWYKQRPGGHPV---FL
IQLVKNG--E-V-----KKQKRLTFQFGEAKKNSSLH------IT-ATQTTDVGTYFCAG
HSAPQ--
>V23RF-CABD02105615.1-trav |(7807, 8097)|2.98474002125|(0.996,1.000,0.989)|1
--TIIDAKTTQPTSMDCAEGRAANLPCNHSTIS-----GNEYVYWYRQIHSQGPQ---YI
IHGLKNN--E--------TNEMASLIITEDRKSSTLI------LP-HATLRDTAVYYCIV
RV-----
>V24RF-CABD02105616.1-trav |(38647, 38934)|2.27800867365|(0.914,0.654,0.953)|1
--VRSQQPVQTPQAMILREGEDAVINCSSSK-A------LYSVHWYRQKHGEAPV---FL
MILLKGG--E-Q-----KGHDKISASFNEKKQQSSLY------LM-ASQLSYSGTYFCGA
E------
>V26RF-CABD02105626.1-trdv |(13262, 13563)|2.91023335954|(0.997,0.995,0.934)|1
-SGTAQTVTQSQPEMSVQEAETVTLSCTYDTSE-----SNYYLFWYKQPPSRQMI---LV
IRQEAYK--Q-Q----NATENRFSVNFQKAAKSFSLK------IS-DSQLGDTAMYFCAF
M------
>V27RF-CABD02105626.1-trav |(22480, 22780)|2.99798400013|(1.000,1.000,0.998)|1
-FSMAQTVTQSQPEMSVQEAETVTLSCTYDTSE-----SDYYLFWYKQPPSRQMI---LV
IRQEAYK--Q-Q----NATENRFSVNFQKAAKSFSLK------IS-DSQLGDAAMYFCAY
R------
>V28RF-CABD02105628.1-trav |(15554, 15842)|2.9949000027|(0.996,0.999,1.000)|1
-LSGELKVGQNPLFLSTQEGKNYTIYCNYSTTS-------DRLYWYKQDPGKSLE---SL
FVLLSNG--A-VK-----QEGRLMASLDTKARLSSLH------IT-AAVHDLSATYFCAV
-------
>V31RF-CABD02136297.1-ighv |(2232, 2554)|2.46168859584|(0.883,0.739,0.927)|1
-VLSQVTLKES-GPVLVKPTEILTLTCTLSGFSL--STSGMGMSWIRQPPGKALE---WL
AHIFSN---D-KKSYSTSLKNRLIISKGTSKSQVVLT------MT-NMDPVDTATYYCAW
RAQ----
>V33RF-CABD02136332.1-ighv |(9347, 9656)|2.99899200002|(0.999,1.000,1.000)|1
-AHSQVQLVQS-GAEVKKPGASVKVSCKASGYTF--T--SYYMHWVRQAPGQGLE---WM
GIINPSG--G-STSYAQKFQGRVTMTRDTSTSTVYME------LS-SLRSEDTAVYYCAR
-------
>V34RF-CABD02136430.1-ighv |(38815, 39121)|2.98070803341|(0.992,0.989,1.000)|1
-VQCEVHLVQS-GGGLVQPGGSLRLSCAGSGFTF--S--SHAMHWVRQAPGKGLE---WV
SAIGTG---G-GTYYADSVKGRFTISRDNAKNSLYLQ------MN-SLRAEDMAVYYCAR
-------
>V35RF-CABD02196505.1-igkv |(9143, 9461)|2.43139706538|(0.986,0.712,0.993)|1
-AYGDIVMTQSPESLAVSLGERVTINCKSSQSVLYSSNNKNYLAWYQQKPGQAPK---LL
IYW------A-STRQSG-VPDRFSGSG--SGTDFTLT------IS-SLQAEDVAVYYCQQ
YYSTP--
>V36RF-CABD02196508.1-igkv |(2277, 2565)|2.27758121945|(0.852,0.681,0.855)|1
-----TTLTQSPAFVSATPGDKVTISCKASQD------IDDDMNWYQQKPGEAAI---FI
IQE------A-TTLVSG-IPPRFSGSG--YGTDFTLT------IN-NIESEDAAYYFCLQ
DDNFP--
>V37RF-CABD02196554.1-igkv |(8457, 8757)|3.0|(1.000,1.000,1.000)|1
-ARCDIQLTQSPTSLSASVGDRVTITCQASQGI------SNNLAWYQQKPGKVPK---LL
IYS------A-SSLQSG-VPSRFSGSG--SGTDFTRT------IS-SLQPEDVATYYCQR
TYNAP--
>V38RF-CABD02196563.1-igkv |(2290, 2590)|3.0|(1.000,1.000,1.000)|1
-ARCDIQMTQSPSSLSASVGDRVTITCRASQGI------SSWLAWYQQKPGKAPK---LL
IYA------A-SSLESG-VPSRFSGSG--SGTDFTLT------IS-SLQPEDFATYYCQQ
ANSFP--
>V39RF-CABD02196568.1-igkv |(5046, 5361)|2.73222579646|(0.996,0.905,0.900)|1
-SSADIVMTQTPLSLPVTPGQPASISCKSSQSLL-HSDGKTYLYWYLQKPGQSPQ---LL
IYE------V-SNRASG-VPDRFSGSG--SGTDFTLK------IS-RVEAEDVRVYYCMQ
GIQLP--
>V40RF-CABD02196577.1-igkv |(8821, 9136)|2.48078156133|(0.957,0.745,0.944)|1
-SSGDIVMTQTPLSLPVNPGQLASISCRSSQSLL-HSNGYTYLHWYLQKPGKSPQ---LL
IYR------V-SSHFSG-VPDRFSGSG--SGSDFTLK------IS-WVEAEDVGVYYCMQ
ATQFP--
>V42RF-CABD02196586.1-igkv |(1073, 1373)|2.99899600001|(1.000,0.999,1.000)|1
-ARCDIQMTQSPSSVSASVGDRVTITCRASQGI------SNSLNWYQQKPGKAPR---LL
IYD------A-SSLESG-VPSRFSGSG--SGTDFTLT------IS-SLQPEDFATYYCQQ
FNSYP--
>V43RF-CABD02196587.1-igkv |(1282, 1582)|3.0|(1.000,1.000,1.000)|1
-ARCAIQMTQSPSSLSASVGDRVTITCRASQGI------SSYLAWYQQKPGKAPK---LL
IYY------A-SSLQSG-VPSRFSGSG--SGTDYTLT------IS-SLQPEDFATYYCQQ
HSSTP--
>V44RF-CABD02196588.1-igkv |(1835, 2135)|2.99698000014|(1.000,0.998,0.999)|1
-TTGEIVMTQSPATLSVSPGERATLSCRASQSV------SSYLAWYQQKPGQAPR---LL
IYG------A-SNRATG-IPARFSGSG--SGTDFTLT------IS-SLEPEDFAVYYCQQ
YNNWS--
>V46RF-CABD02196595.1-igkv |(5365, 5665)|2.99698000014|(1.000,0.999,0.998)|1
-ARCAIRMTQSPSSLSASTGDRVTITCRASQGI------SSYLAWYQQKPGKAPK---LL
IYA------A-STLQSG-VPSRFSGSG--SGTEFTLT------IS-CLQSEDFATYYCQQ
YYSYP--
>V47RF-CABD02199693.1-igkv |(2056, 2356)|2.99899600001|(1.000,1.000,0.999)|1
-ARCDIQVTQSPSSLSASVGDRVTITCRASQGI------SNELSWYQQKPGQAPT---LL
IYA------A-SSLQSG-VPSRFSGSG--SGTDFTLT------IS-SLQPEDIATYYCLQ
DYTTP--
>V48RF-CABD02231299.1-iglv |(4157, 4463)|2.98021230726|(0.998,0.999,0.984)|1
--DSQTVVTQE-PSFSVSPGGTVTLTCGLSSGSV---STSYYPSWYQQTPGQAPR---ML
IYS------T-NTRSSG-VPDRFFGSI--IGNKAALT------IT-GAQADDESDYYCVL
YMGSGI-
>V49RF-CABD02231318.1-iglv |(3555, 3862)|2.99067605248|(1.000,1.000,0.991)|1
-SWANFMLTQP-HSVSESPGQTVTISCTRSSGSI---AS-NYVQWYQQRPGSAPT---TV
IYE------D-NQRPSG-VPDRFSGSIDSSSNSASLT------IS-GLKTEDEADYYCQS
YDSS---
>V50RF-CABD02231359.1-iglv |(5556, 5865)|2.99593600205|(1.000,1.000,0.996)|1
-SWAQSVLTQP-PSVSAAPGQKVTISCSGSSSNI---GNN-YVSWYQQLPGTAPK---IL
IYD------N-NKRPSG-ISDRFSGSK--SGTSATLG------IT-GLQTGDEADYYCGT
WDSSLSA
>V52RF-CABD02231360.1-iglv |(25045, 25355)|2.5649593666|(0.984,0.763,0.996)|1
-SLSQPVLTQP-TSLSASPGASARLTCTLRSGIN---LGTYRIYWYQQKPGSPPR---YL
LNYYSDS--D-KHQGSG-VPSRFSGSKDASTNAGILV------IS-GLQSEDEADYYCMI
-------
>V53RF-CABD02231362.1-iglv |(1583, 1892)|2.99899200002|(0.999,1.000,1.000)|1
-SWAQSVLTQP-PSASGTPGQRVTISCSGSSSNI---G-SNTVNWYQQLPGTAPK---LL
IYD------N-NKRPSG-VPDRFSGSK--SGTSASLA------IS-GLRSEDEADYYCAA
WDDSLNG
>V54RF-CABD02231364.1-iglv |(18770, 19079)|2.99799600001|(0.999,0.999,1.000)|1
-SWAQSVLTQP-PSASGTPGQRITISCSGSSSNI---G-SNTVNWYQQLPGTAPK---LL
IYD------N-NKRPSG-VPDRFSGSK--SGTSASLA------IS-GLQSEDEADYYCAA
WDDSLNG
>V55RF-CABD02231410.1-iglv |(1308, 1605)|2.99899200002|(0.999,1.000,1.000)|1
-SVASYELTQP-SSVSVSPGQTARITCSGDV--L---AK-NYAGWYQQKPGQAPV---LV
IYK------D-SERPSG-IPERFSGSS--SGTTVTLT------IS-GAQVEDEADYYCYS
AADNN--
>V56RF-CABD02231415.1-iglv |(2745, 3048)|2.95863747374|(0.998,0.965,1.000)|1
-SEASYELTQP-PSVSVSLGQTARITCSGEE--L---PK-KYAYWYQQKPGQSPV---LV
IYK------D-SERPSG-IPERFSGSS--SGTTVTLT------IS-GVQAEDEADYYCLS
ADSSDTY
>V58RF-CABD02231416.1-iglv |(22863, 23166)|2.78653903739|(0.992,0.863,0.996)|1
-SVVSSELTQD-PAVSVALGQTVRITCQGDS--L---RS-YYASWYQQKPGQVPV---LI
IYG------K-NNRPSG-IPDRFSGSS--SGNTASLT------IT-GAQEEDEADYYCNS
WDSSGNH
>V59RF-CABD02231419.1-iglv |(2003, 2306)|2.98867205249|(0.999,1.000,0.990)|1
-SWAQSALTQP-PSVSGSPGQSVTISCTGTSSDI---GGYNRASWYQQHPGKAPK---LM
IYE------V-SKRPSG-VSNRFSGSK--SGNTASLT------IS-GLQAEDEADYYCSS
YTSS---
>V60RF-CABD02231421.1-iglv |(1448, 1751)|2.99385601037|(1.000,1.000,0.994)|1
-SWAQSALTQP-ASVSGSPGQSITISCTGTSSDV---GGYNYVSWYQQHPGKAPK---LM
IYY------V-SNRPSG-VSNRFSGSK--SGNTASLT------IS-GLQAEDEADYYCSS
YTSS---
>V61RF-CABD02231422.1-iglv |(7425, 7728)|2.97810040488|(0.998,0.983,0.998)|1
-SATSYELTQP-HSVSVATAQTARITCGGNN--I---GS-KAVHWYQQKPGQDPV---LV
IYS------D-SNRPSG-IPERFSGSN--SGNTATLT------IS-RIEAGDEADYYCQV
WDSSSDH
>V62RF-CABD02231427.1-iglv |(14063, 14366)|2.99599600001|(0.999,0.998,0.999)|1
-SEASYELTQS-PSVSVSPGQTARITCSGDA--L---PK-KYAYWYQQKPGQAPV---LV
IYE------D-SKQPSG-IPERFSGSS--SGTMATLT------IS-GAQVEDEADYYCYS
TDSSGNH
>V63RF-CABD02231427.1-iglv |(25067, 25377)|2.86355045787|(0.982,0.996,0.908)|1
-SWAQSALIQP-PSASGSPGQSVTISCTGTSSDI---GGYNYVSWYQRHPGKAPK---LM
IYE------V-SNRPSG-VPNRFSGSK--SGNTASLT------IS-GLQAEDEADYYCCS
YAGSNN-
>V64RF-CABD02231431.1-iglv |(3583, 3879)|3.0|(1.000,1.000,1.000)|1
-SVASYELTQP-PSVSVSPGQTASITCSGDK--L---GD-EYAYWYQQKPGQSPV---LV
IYQ------D-SKRPSG-IPERFSGSN--SGNTATLT------IS-GTQAMDEADYYCQA
WDSST--
>V66RF-CABD02352480.1-trbv |(136, 449)|2.97482866804|(0.997,0.999,0.980)|1
--PIDTEVTQTPKHLVMGMTNKKSLKCEQHM-G------HRAMYWYKQKAKKPPE---LM
FVYSY-E--K-LSVN-ESVPSRFSPE-CPNNSLLNLH------LH-ALQPEDSALYLCAS
SQDTALQ
>V67RF-CABD02352480.1-trbv |(7988, 8284)|2.33134858062|(0.972,0.815,0.778)|1
--PVEAGVTQTPRYLIKTRGQQVTLSCSPIS-G------HRSVSWYQQTLGQGLQ---FL
FEYFG-E--T-QRNKGN-FPGRFSGR-QFSNSRSEMN------VS-TLELGDSALYLCAS
SL-----
>V68RF-CABD02352482.1-trbv |(248, 545)|2.99594800078|(0.997,0.999,1.000)|1
--PVNAGVAQTPKFQVLKTGQSMTLQCAQDM-N------HNSMYWYRQDPGMGLR---LI
YYSAA-E--G-TTAKGE-VPDGYNVS-RLNKREFSLR------LE-SAAPSQTSVYFCAS
SE-----
>V69RF-CABD02352488.1-trbv |(3197, 3494)|2.99293600205|(0.999,0.995,0.999)|1
--PVNAGVTQTPKFHVLKTGQSMTLLCAQDM-N------HEYMYWYRQDPGMGLR---LI
HYSVG-E--G-TTAKGE-VPDGYNVS-RLKKQNFLLG------LE-SAAPSQTSVYFCAS
SY-----
>V70RF-CABD02352491.1-trbv |(2383, 2680)|3.0|(1.000,1.000,1.000)|1
--PLDTAVSQTPKYLVTQMGKKESLKCEQNL-G------HNAMYWYKQDSKKFLK---TM
FIYSN-K--E-PILN-ETVPNRFSPD-SPDKAHLNLH------IN-SLELGDSAVYFCAS
SQ-----
>V71RF-CABD02352492.1-trbv |(775, 1088)|2.92516849053|(0.999,1.000,0.940)|1
--PMEMGVTQTPRHLVMGMTNKKSLKCEQHL-G------HNAMYWYKQSAKKPLE---LM
FVYSL-E--E-RVEN-NSVPSRFSPE-CPNSSHLFLH------LH-ALQPEDSALYLCAS
SQDTALQ
>V72RF-CABD02352493.1-trbv |(4882, 5179)|2.97580866856|(0.997,1.000,0.980)|1
--PVDAGVTQTPKFQVLKTGQSMTLQCAQDM-N------HNYMYWYRQDPGKGLR---LI
HYSAG-E--G-TTAKGE-VPDGYNVS-RLNTQNFLLR------LE-LAARSQTSVYFCAT
SE-----
>V73RF-CABD02352494.1-trbv |(447, 747)|2.95152072039|(0.993,0.976,0.984)|1
--HTRAGVSQSPSNKVTEKGKDVVFRCDPIS-G------HSVLYWYQQSLGQGLE---FL
IYFQG-N--S-APDKSGLPSDRFSAE-RTGGSVSTLT------IQ-RTQQEDSAMYLCAS
SL-----
>V74RF-CABD02352498.1-trbv |(5308, 5605)|2.49688509678|(0.988,0.890,0.795)|1
--PMIAGITQAPTSQILAAGRSMTLRCTQDM-R------HNAMYWYRQDLGLGLR---LI
HYSNT-A--G-TTGKGE-VPDGYSVS-RANTDDFPLM------LA-SAVPSQTSVYFCAS
SD-----
>V75RF-CABD02352499.1-trbv |(1151, 1451)|2.99174403277|(1.000,1.000,0.992)|1
--HTGAGVSQTPSNKVTEKGKDVELRCDPIS-G------HTALYWYRQSLGQGPE---FL
IYFQG-T--G-ATDDSGLPNDRFFAV-RPEGSVSTLK------IQ-RTEQGDSAVYLCAS
SL-----
>V77RF-CABD02352499.1-trbv |(8716, 9012)|2.9864040992|(0.990,1.000,0.997)|1
--PVDSGVTQTPKHLITATGQRVTLRCSPRS-G------DLSVYWYQQSLDQGLQ---FL
IQYYN-G--E-ERAKGN-ILERFSAQ-QFPDSHSELN------LS-SLELGDSALYLCAS
SV-----
>V80RF-CABD02352501.1-trbv |(16783, 17080)|2.96190837717|(0.999,1.000,0.967)|1
--PVNAGVTQTPKFQVLKTGQSMTLQCAQDM-N------HDYMYWYRQDPGMGLR---LI
HYSVG-A--G-ITDKGE-VPNGYNVS-RSNTEDFPLR------LQ-SAAPSQTSVYFCAS
SY-----
>V81RF-CABD02352502.1-trbv |(788, 1088)|2.99899600001|(1.000,0.999,1.000)|1
--HTGAGVSQSPRYKVAKRGRDVALRCDSIS-G------HVTLYWYRQTLGQGSE---VL
TYFRS-D--A-QRDKSGRPSGRFSAE-RPERSVSTLK------IQ-RTEQGDSAVYLCAS
SL-----
>V82RF-CABD02352503.1-trbv |(2597, 2893)|2.99298400013|(0.997,0.997,0.999)|1
--SVETGVTQSPTHLIKTRGQQVTLRCSPQS-G------HNTVSWYQQALGQGPQ---LI
FQYYR-E--E-ENGRGN-FSPRFSGR-QFPNYSSELN------VN-ALELDDSALYLCAS
SL-----
>V83RF-CABD02352508.1-trbv |(1078, 1374)|2.99899200002|(0.999,1.000,1.000)|1
--PVDAGVTQSPTHLIKTRGQQVTLRCSPQS-G------HNTVSWYQQALGQGPQ---FI
FEYYE-K--E-ERGRGN-FPDRFSAR-QFPNYSSELN------VN-ALLLGDSALYLCAS
SL-----
>V86RF-CABD02352509.1-trbv |(10643, 10939)|2.99498400013|(0.999,0.997,0.999)|1
--LVDAGVTQSPTHLIKTRGQQVTLRCSPKS-G------HDTVSWYQQALGQGPQ---FI
FQYYE-E--E-ERQRGN-FPDRFSGH-QFPNYSSELN------VN-ALLLGDSALYLCAS
SL-----
>V87RF-CABD02352510.1-trbv |(11938, 12229)|2.95451241325|(0.999,0.972,0.987)|1
----NAGVTQTPKFHILKTGQSMTLQCAQDM-N------HGYMSWYRQDPGMGLR---LI
YYSAA-A--G-TIDKGE-VPNGYNVS-RLNTEDFLLR------PV-SAAPSQTSVYFCAS
SY-----
>V88RF-CABD02352511.1-trbv |(3159, 3459)|3.0|(1.000,1.000,1.000)|1
--HTGAGVSQSPRYKVTKRGQDVTLRCDPIS-S------HATLYWYQQALGQGPE---FL
TYFNY-E--A-QPDKSGLPNDRFSAE-RPEGSNSTLT------IQ-RTEQRDSAMYLCAS
SL-----
>V89RF-CABD02352511.1-trbv |(16331, 16627)|2.4852716929|(0.973,0.975,0.737)|1
--PVDAGVTQSPTHLIKMRGQQVTLRCSPKS-G------HDTVSWYQQALGQGPQ---FI
FEYYE-K--E-ERGRGN-FPDRFSAR-QFPNYSSELN------VN-PLLMGDSALYLCAS
SL-----
>V90RF-CABD02352511.1-trbv |(25598, 25898)|3.0|(1.000,1.000,1.000)|1
--HADTGVSQDPRHKITKRGQNVTFRCDPIS-E------HNQLYWYRQTLGQGPE---FL
TYFQN-E--A-QLEKSRLLSDRFSAE-RPKGSFSTLE------IQ-RTEQGDSAMYLCAS
SL-----
>V91RF-CABD02352512.1-trbv |(835, 1135)|3.0|(1.000,1.000,1.000)|1
--HADTGVSQDPRHKITKRGQNVTFRCDPIS-E------HNQLYWYRQTLGQGPE---FL
TYFQN-E--A-QLEKSRLLSDRFSAE-RPKGSFSTLE------IQ-RTEQGDSAMYLCAS
SL-----
>V92RF-CABD02352512.1-trbv |(7390, 7687)|2.97384066792|(0.997,0.980,0.998)|1
--SVAAGVIQSPRHLIKEKRETATLKCYPIP-R------HDTVYWYQQGPGQDPQ---FL
ISFYE-K--M-QSDKGS-IPDRFSAQ-QFSDYHSELN------MS-SLELGDSALYFCAS
SL-----
>V93RF-CABD02352513.1-trbv |(1353, 1650)|2.99699200002|(0.999,1.000,0.998)|1
--HMDAGITQSPRHKVTEIGTPVTLRCHQTE-N------HRYMYWYRQDPGHGLR---LI
HYSYG-V--K-DTDKGE-VSDGYSVS-RSKTEDFLLT------LE-SATSSQTSVYFCAI
SE-----
>V94RF-CABD02352514.1-trbv |(8741, 9041)|2.99294800078|(0.998,0.995,1.000)|1
--LIEAGVVQSPRYKIIEKKQPVAFWCNPIS-G------HNTLYWYRQNLGQGPE---LL
IRYEN-E--E-AVDDSQLPKDRFSAE-RLKGVDSTLK------IQ-PAELGDSAVYLCAS
SL-----
>V95RF-CABD02352514.1-trbv |(14343, 14643)|2.99899200002|(0.999,1.000,1.000)|1
--HTDAGVIQSPRHEVTEMGQEVTLRCKPIS-G------HNSLFWYRQTMMRGLE---LL
IYFNN-N--V-PIDDSGMPKDRFSAK-MPNASFSTLK------IQ-PSEPRDSAVYFCAS
SL-----
>V96RF-CABD02352515.1-trbv |(2177, 2477)|2.98230822856|(0.998,1.000,0.985)|1
--HTDAGVIQSPRHEVTEMGQEVTLRCKPIS-G------HNSLFWYRQTMMRGLE---LL
IYFNN-N--V-PIDDSAMPKDRFSAK-MPNASFSTLK------IQ-PSEPRDSAVYFCAS
SL-----
>V97RF-CABD02352520.1-trbv |(3657, 3957)|2.97897252412|(0.999,0.983,0.998)|1
--HIEAGVTQFPSHSVIEKGQTVTLRCDPIS-G------HDNLYWYRRVMGKEIK---FL
LHFVK-E--S-KQDESGMPNNRFLAE-RTGGTYSTLK------VQ-PAELEDSGVYFCAS
SQ-----
>V98RF-CABD02352520.1-trbv |(8783, 9080)|2.54187413994|(0.952,0.914,0.786)|1
--HGDAMVIQNPRYQVTQFGKPVTLSCSQNL-N------HNIMYWYQQKSSQAPK---LL
FHYYD-K--D-FNNE-ADTPDNFQSR-RPNTSFCFLD------IS-SPGLGDAAMYLCAT
SR-----
>V99RF-CABD02352525.1-trbv |(5450, 5746)|2.93433795981|(0.991,0.976,0.970)|1
--LSNAGVMQNPRHLVRRRGQEARLRCSPMK-G------HSHVYWYRQLPEEGLK---FM
VYLQK-E--N-IIDESGMPKERFSAE-FPKEGPSILR------IQ-QAVRGDSAAYFCAS
S------
>V100RF-CABD02352526.1-trbv |(2325, 2622)|3.0|(1.000,1.000,1.000)|1
--TVDGGITQSPKYLFRKEGQNVTLNCEQNL-N------HDAMYWYRQDPGQGLR---LI
YYSQI-V--N-DFQKGD-IAEGYSVS-REKKESFPLT------VT-SAQKNPTAFYLCAS
SI-----
>V101RF-CABD02352526.1-trbv |(20182, 20482)|2.47292667378|(0.924,0.839,0.799)|1
--STDTKVTQRPRLLVKASEQKAKMDCVPIK-G------HSYVYWYRKKLEEELK---FL
VYFQN-E--E-IIQKAEIINERFLAQ-CSKNSSCTLE------IQ-STESGDTALYFCAS
SK-----
>V102RF-CABD02352526.1-trbv |(29242, 29542)|2.97810040488|(0.998,0.998,0.983)|1
--SFHAKVTQTPGHLVKGKGQKTKMDCTPEK-G------HTFVYWYQQNQNKEFM---LL
ISFQN-E--Q-VLQETEMHKKRFSSQ-CPSNTPCSLA------IL-SSEPGDTALYLCAS
SQ-----
>V103RF-CABD02352529.1-trbv |(2516, 2814)|2.9138228881|(0.993,0.992,0.940)|1
--SMDADVTQTPRNRITKTGKRIMLECSQTK-G------HDRMYWYRQDPGLGLR---LI
YYSFD-V--K-DINKGE-ISDGYSVS-RQAQAKFSLS------LE-SATPNQTALYFCAT
SD-----
>V104RF-CABD02352529.1-trbv |(16657, 16954)|2.30872895513|(0.949,0.999,0.658)|1
--LMEADIYQTPRYLVIGTGKKITLECSQTM-G------HDKMYWYQQDPGMELH---LI
HYSYG-V--N-STEKGG-LSSESTVS-RIRTEHFPLT------LE-SARPSHTSQYLCAS
SE-----
>V105RF-CABD02352531.1-trbv |(24520, 24817)|2.98851611711|(1.000,1.000,0.989)|1
--PLEAQVTQNPRYLITVTGKKLTVTCSQNM-N------HEYMSWYRQDPGLGLR---QI
YYSIN-V--E-AIDKGD-VPEGYNVS-RKEKRNFPLI------LE-SPSPNQTSLYFCAS
SL-----
>V106RF-CABD02352532.1-trbv |(6479, 6776)|2.99399200002|(0.998,0.999,0.997)|1
--LVDVKVTQSSRYLVKRMGEKVFLECVQDM-D------HENMFWYRQDPGLGLR---LI
YFSSD-V--K-MKEKGD-IPEGYSVS-REKKERFSLI------LE-STSTNQTSMYLCAS
SL-----
>V107RF-CABD02377004.1-trbv |(3098, 3398)|2.95966884009|(0.994,0.976,0.991)|1
--SMDTKVTQRPRLLVKANEQKAKMDCVPIK-R------HSYVYWYHKTLEEELK---FL
IYFQN-E--E-IIQKAEIINERFSAQ-CPQNSPCTLE------IQ-STESGDTARYFCAN
SK-----
>V109RF-CABD02377005.1-trbv |(21584, 21875)|2.94083253448|(0.988,0.982,0.972)|1
--LMEAEIYQTPRYHVIGTGKKITLECSQTM-G------HDKMYWSRSRNGITPH---PP
FL--W-V--N-STEKGD-LSSESTVS-RIRIEHFPLT------LE-SASPSHTSQYLCAS
SE-----
>V110RF-CABD02377030.1-trbv |(2304, 2607)|2.95022423344|(0.981,0.994,0.976)|1
-SVFSAVISQKPSRDICQRGTSMTIQCQVNSQV-------TMMFWYCQQPGQSVT---LI
ATANQGS--E-ATYESGFVIDKFPIS-CPNLTFSTLT------VS-NRSPEDSSIYLCSV
E------
>V111RF-CABD02105639.1-trdv |(1838, 2144)|2.97767205249|(0.996,0.995,0.987)|-1
RGMLCDKVTQSSPDQTVASGSEVVLLCTYDTVY-----SNPDLFWYRIRPDYSFQ---FV
FYGDNSG--S-QA--ADFTQGRFSVKHILTQKAFHLV------IS-PVRTEDSATYYCAF
-------
>V112RF-CABD02117385.1-ighv |(3331, 3640)|3.0|(1.000,1.000,1.000)|-1
-AHSQVQLVQS-GAEVKKPGASVKVSCKASGYTF--T--GYAMHWVRQAPGQRLE---WM
GWINTGN--G-NTKYSQKFQGRVTITRDTSASTAYME------LS-SLRSEDTAVYYCAR
-------
>V114RF-CABD02117395.1-ighv |(10192, 10503)|2.99593600205|(1.000,1.000,0.996)|-1
-VQCEVQLVES-GGGLVQPGRSLRLSCVASGFTF--D--DYAMHWVRQAPGKGLE---WV
SGISWN--SG-STGYADSVKGRFTISRDNAKNSLYLQ------MN-SLRAEDTALYYCAK
D------
>V115RF-CABD02117395.1-ighv |(23380, 23689)|2.75715320354|(0.978,0.985,0.854)|-1
-VHSQVQLVQS-GAEVRKPGSSVKVSCKLSGGTF--S--SYAISWVRQAPGQGLE---WM
GGFIPIL--G-TANYAQKFQGRVTITADESTSTAYME------LS-SLRSEDTAVYYCAR
-------
>V116RF-CABD02117398.1-ighv |(503, 809)|2.99899600001|(1.000,1.000,0.999)|-1
-VQCEVQLVES-EGGLVQPGGSLRLSCAASGFTF--S--SYNMHWVRQAPGKGLE---WV
SAIGTG---G-DTYYPGSVKGRFTISRENAKNSLYLQ------MN-SLRAEDTAVYYCAR
-------
>V117RF-CABD02117416.1-ighv |(7584, 7893)|2.99593600205|(1.000,1.000,0.996)|-1
-VQCEVQLVES-GGGLVQPGGSLRLSCAASGFTF--S--DYYMSWVRQAPGKGLE---WV
SGINWN--GG-STGYADSVKGRFTISRNNAKNSLYLQ------MN-SLRAEDTALYYCAR
-------
>V118RF-CABD02117419.1-ighv |(907, 1216)|3.0|(1.000,1.000,1.000)|-1
-VQCEVQLVES-GGGLVKPGGSLRLSCAASGFTF--S--SYWMSWVRQAPGKGLE---WV
SVISSSG--R-TTYYADSVKGRFTISRDNAKNSLYLQ------MN-SLRAEDTAVYYCAR
-------
>V119RF-CABD02117420.1-ighv |(2703, 3012)|2.99899600001|(1.000,0.999,1.000)|-1
-VQCDVQLVES-GGGLVQPGGSLRLSCAASGFTF--S--SYGMSWVRQAPGKGLE---WV
SYISSSS--S-YIYYADSVKGRFTISRDNAKNSLYLQ------MN-SLRAEDTAVYYCAR
-------
>V120RF-CABD02117421.1-ighv |(1503, 1818)|3.0|(1.000,1.000,1.000)|-1
-AQCEVQLVES-GGGLVKPGGSLRLSCAASGFTF--S--NYYMEWVRQAPGKGLE---WV
GFIRTKAKGG-TTEYAASVKGRFTISRDDSKSIAYLQ------MN-SLKTEDTAVYYCTR
-------
>V121RF-CABD02117430.1-ighv |(2094, 2408)|2.53261382323|(0.941,0.786,0.903)|-1
-VLSQVTLKES-GPVLVKPTETLTLTCTVSGFSL--SNARMGVSWIRQPPGKALE---WL
AHIFSN---D-EKSYSTSLKSRLTISKDTSKSQVVLT------MT-NMDPVDTATYYCAW
I------
>V122RF-CABD02117431.1-ighv |(1312, 1621)|2.99389600501|(1.000,0.999,0.995)|-1
-AHSQVQLVQS-GSEVKKPGASVKVSCKASGYTF--T--SYGMNWVRQAPGQGLE---WM
GWINTYT--G-NPTYAQGFTGRFVFSMDTSVSTAYLQ------IS-SLKAEDTAMYYCAR
-------
>V123RF-CABD02117438.1-ighv |(419, 731)|2.30823461948|(0.853,0.979,0.667)|-1
-VLSQVQLQQW-GPGLVKPSETLSLTCAVYGGSI--SSSDYYWSWIRQPPGKGLE---WI
GLINY-V--R-STNYNPSLKSRVTISVDTSKNQFSLK------LS-SVTAADTAVYYCAR
-------
>V124RF-CABD02117439.1-ighv |(2063, 2375)|2.75306024415|(0.909,0.880,1.000)|-1
-VLSQVQLQQW-GTGLVKPSETLSLTCAVYGGSI--SSDGYYWSWIRQPPGKGLE---WI
GYIYY-S--G-STYYNPSLKSRVTISVDTSKNQFSLK------LS-SVTAADTAVYYCAR
-------
>V125RF-CABD02117442.1-ighv |(1416, 1725)|2.99296000066|(0.997,0.996,1.000)|-1
-VQCQVQLVES-AGGVVQPGRSLTLSCTASGFTF--S--SYGMHWVRQAPGKGLE---WV
AVISYDA--S-NKYYAASVKGRFTISRDNSKNTLYLQ------MN-SLRAEDTAVYYCAK
-------
>V126RF-CABD02117444.1-ighv |(7682, 7991)|3.0|(1.000,1.000,1.000)|-1
-VQCQVQLVES-GGGVVQPGRSLRLSCTASGFTF--S--SYGMHWVRQAPGKGLE---WV
AVISYDA--S-NKYYADSVKGRFTISRDNSKNTLYLQ------MN-SLRAEDTAVYYCAK
-------
>V127RF-CABD02117445.1-ighv |(8585, 8891)|2.26209525525|(0.903,0.907,0.661)|-1
-VLSQVQLQQW-GAGVVKPSETLSLTCAVYGGSF----SGYYWNWIRQPPGKGLE---WI
GRISY-D--G-STNYNPSLKSRVTISVDTSKNQFSLK------LS-SVTAADTAVYYCAR
-------
>V128RF-CABD02117454.1-ighv |(1407, 1716)|2.65547321532|(0.994,0.977,0.811)|-1
-VLSQVQLQES-GPGLVKPSETLSLTCVVSGGSI--SSS-NWWSWVRQPPGKGLE---WI
GEIYH-S--G-SPNYNPSLKSRVTISVDKSKNQFSLK------LS-SVTATDTAVYYCAR
-------
>V129RF-CABD02117457.1-ighv |(5100, 5407)|2.98521630725|(1.000,1.000,0.986)|-1
-VQCEVQLVES-GGGLVQPEGSLKLSCAASGFTF--S--SYAMDWVRQAPGKGLE---WV
AHIWND--GS-QKYYADSVKGRFTISRDNSKSMLYLQ------MD-SLKAEDTAMYYCT-
-------
>V130RF-CABD02117463.1-ighv |(7715, 8026)|2.74451417048|(0.994,0.999,0.841)|-1
-VQCEVQLVES-GGGVVQPGRSLRLSCAASGFTF--D--DYAMHWVRQAPGKGLE---WV
SRISWG--GG-STYYADSVKGLFTISRDNSKISLYLQ------MN-SLRAEDTALYYCAK
D------
>V131RF-CABD02117467.1-ighv |(8162, 8468)|2.7419382801|(0.988,0.841,0.996)|-1
-AQCEVQLVES-GGGLVQPGGSLRPSCAASGFAF--S--SYVLHWVRRAPGKGLE---WV
SAIGT---GG-DTYYADSVMGRFTISRDNAKKSLYLQ------MN-SLIAEDMAVYYCAR
-------
>V132RF-CABD02117467.1-ighv |(15696, 16005)|2.99899200002|(0.999,1.000,1.000)|-1
-AHSQVQLVQS-GAEVKKPGASVKVSCKASGYTF--T--SYYMHWVRQAPGQGLE---WM
GIINPSG--G-STSYAQKFQGRVTMTRDTSTSTVYME------LS-SLRSEDTAVYYCAR
-------
>V133RF-CABD02117467.1-ighv |(19808, 20117)|2.98989600501|(0.998,0.993,0.999)|-1
-AYSQMQLVQS-GAEVKKTGASVKVSCKASGYTF--T--YRSLHWVRQAPGQALE---WM
GWITPYN--G-NTNYAQKFQDRVTITRDRSMSTAYME------LS-SLRSEDTAVYYCAR
-------
>V134RF-CABD02117471.1-ighv |(687, 996)|2.99199200002|(0.998,0.997,0.997)|-1
-VQCDVQLVQS-GGGLVQPGGSLRLSCAASGFTF--S--SYWMHWVRQAPGKGLE---WV
ANIKKDG--S-GKYYVDSVKGRFTISRDNAKNSLYLQ------MN-SLRAEDTAVYYCAR
-------
>V135RF-CABD02117473.1-ighv |(12286, 12601)|2.99899200002|(0.999,1.000,1.000)|-1
-VQCEVQLVES-GGGLVKPGGSLRLSCTASGFTF--G--DYTMSWVRQAPGKGLE---WV
GFIRSKAYGG-TTEYAASVKGRFTISRDDSKSIAYLQ------MN-SLKTEDTAVYYCTT
-------
>V136RF-CABD02117475.1-ighv |(8201, 8508)|2.52111950764|(0.914,0.955,0.755)|-1
-VCAEVQLVQS-AAEVKRPGESLRISCKGSGYSF--T--SYWIGWVRQMPGKGLE---WM
GIIYPGD--S-DTRYSPSFQGQVTISADSSISTAYLQ------WS-SLKASDTAMYYCA-
-------
>V137RF-CABD02117477.1-ighv |(2704, 3013)|2.994900005|(1.000,1.000,0.995)|-1
-VQCEVQLVES-GGGLVQPGGSLRLSCVASGFTF--S--SYAMSWVRQAPGKGLE---WV
STISST--GG-STWYPGSVKGRFTISRDNSKNTLYLQ------MN-SLRAEDTAVYYCAK
-------
>V138RF-CABD02117482.1-ighv |(11133, 11445)|2.99385601037|(1.000,0.994,1.000)|-1
-VLSQVQLQES-GPGLVKPSQTLSLTCTVSGGSI--SSGSYYWSWIRQPPGKGLE---WI
GYIYY-S--G-STNYNPSLKSRVTISVDTSKNQFSLK------LS-SVTAADTAVYYCAR
-------
>V139RF-CABD02117482.1-ighv |(15935, 16229)|2.98875601537|(1.000,0.994,0.995)|-1
------QLVQS-GPEVKKPGASVKVSCKASGYTF--T--SSAMQWVRQAPGQGLE---WI
GWIIVGS--G-NTNYAQKFQGRVTITRDTSTSTAYME------LS-SLRSEDMAVYYCAA
-------
>V140RF-CABD02117487.1-ighv |(1480, 1789)|3.0|(1.000,1.000,1.000)|-1
-VQCEVQLVES-GGGLVQPGGSLRLSCAASGFTF--S--SYHMSWVRQAPGKGLE---WV
SVIYSDG--S-STYYAASVKGRFTISRDNSKNTLYLQ------MN-SLRAEDTAVYYCAR
-------
>V141RF-CABD02117492.1-ighv |(7493, 7808)|2.99798400013|(1.000,1.000,0.998)|-1
-VQCEVQLVES-GGGLVQPGGSLRLSCAASGFTF--S--NYYKSWVCQAPGKGLE---WV
RFIRNKANGG-TTEYTTSVKGRFTISRDDSKSITYLQ------MN-SLKTEDTAVYYCSR
-------
>V142RF-CABD02117494.1-ighv |(3416, 3731)|3.0|(1.000,1.000,1.000)|-1
-VQCEVQLLES-GGGLVQPGGSLRLSCAASGFTF--S--DHYMDWVRQAPGKGLE---WV
GRIRNKANSY-TTEYAASVKGRFTISRDDSKNSLYLQ------MN-SLKTEDTAVYYCTT
-------
>V143RF-CABD02117499.1-ighv |(3042, 3351)|3.0|(1.000,1.000,1.000)|-1
-VQCEVQLLES-GGGLVQPGGSLRLSCAASGFTF--S--SYWMHWVRQAPGKGLE---WV
SRINSDG--S-STSYADSVKGRFTISRDNAKNTLYLQ------MN-SLRAEDTAVYYCAR
-------
>V144RF-CABD02117506.1-ighv |(3288, 3597)|2.99193200206|(0.999,0.995,0.998)|-1
-TYSQVQLVQS-GHEVKQPGASVKVSCKASGYSF--T--SYGMNWVRQAPGQGLE---WM
GWFNTYT--G-NPTYAQGFTGRFVFSMDTSVSTAYLQ------IS-SLKAEDTAMYYCAR
-------
>V145RF-CABD02117545.1-ighv |(2488, 2803)|2.9304040992|(0.976,0.969,0.986)|-1
-VQCEVQLVES-GGGLVQPGGSLRLSCAASGFTF--S--DHYRSWVRQAQGKGLE---LV
GLIRNKANSY-TTEYAASGKGRFTISRGDSKNTLYLQ------MS-SLKTEDLAVYYCAR
-------
>V146RF-CABD02117766.1-ighv |(420, 729)|2.99699200002|(0.999,1.000,0.998)|-1
-AHSQVQLVQS-GAEVKKPGASVKVSCKASGYTF--T--DYYMHWVRQAPGQGLE---WM
GRINPNS--G-GTNYTQKFQGRVTMTRDTSISTAYME------LS-RLRSEDTATYYCAR
-------
>V147RF-CABD02117767.1-ighv |(2221, 2530)|2.99498000014|(0.998,0.997,1.000)|-1
-AHSQVQLVQS-GAEVKKPGASVKVSCKASGYTF--T--GYYMHWVRQAPGQGLE---WM
GWINPNS--G-GTNYAQKFQGRVTMTRDTSISTAYME------LS-RLRSEDTATYYCTR
-------
>V148RF-CABD02136430.1-ighv |(23813, 24119)|2.98070803341|(0.992,0.989,1.000)|-1
-VQCEVHLVQS-GGGLVQPGGSLRLSCAGSGFTF--S--SHAMHWVRQAPGKGLE---WV
SAIGTG---G-GTYYADSVKGRFTISRDNAKNSLYLQ------MN-SLRAEDMAVYYCAR
-------
>V149RF-CABD02136430.1-ighv |(37941, 38248)|2.99899200002|(0.999,1.000,1.000)|-1
-AQCEVQLVES-GGGLVQPGGSLRLSCAASGFTF--S--NHYTSWVLQAPGKGLE---WV
SYISG--DSD-YTNYADSVKGRFTISRDNAKNSLYLR------MN-SLRAEDTAVYYCV-
-------
>V150RF-CABD02196508.1-igkv |(4447, 4759)|2.48468234975|(0.939,0.925,0.752)|-1
-CNGDIVLTQSPASLAMSPGQRATITCRASECVSF-LG-INLIHWYQQKPGQPPK---LL
IYQ------A-SNKDIG-VPARFSGSG--SGTDFTLT------IN-PVEANNTAKYYCLQ
SKNFP--
>V151RF-CABD02196513.1-igkv |(3814, 4114)|2.99796800026|(0.998,1.000,1.000)|-1
-AKCDIQMTQSPSTLSASVGDRVTITCRASQGI------SKLLAWYQQKPGKAPK---LL
IYA------A-SSLESG-VPSRFSGSG--SGTEFTLT------IS-SLQPDDFATYYCQQ
HSSTP--
>V152RF-CABD02196515.1-igkv |(8253, 8553)|2.97723755493|(1.000,0.979,1.000)|-1
-ARCDIRMTQSPSSLSASVGDRVTITCRASQGI------RNDLGWYQQKPGKAPK---IL
IYA------A-SSLQSG-VPSRFSGSG--SGTDFTLT------IS-SLQPEDFATYYCLQ
DYNYP--
>V154RF-CABD02196521.1-igkv |(5557, 5857)|3.0|(1.000,1.000,1.000)|-1
-ARCDIQMTQSPSSLSASVGDRVTITCRASQGI------SKWLAWYQQKPGKAPK---RL
IYA------A-SSLESG-VPSRFSGSG--SGTEFTLT------IS-SLQPEDFATYYCLQ
YNSYP--
>V155RF-CABD02196542.1-igkv |(3007, 3305)|2.75726982916|(0.995,0.849,0.995)|-1
-SRGEIVLTQSPDFQSVTPKEKVTITCRASQS------IGSSLHWYQQKPDQSPK---LL
IKY------A-SQSISG-VPSRFSGSG--SGTDFTLT------IN-SLEAEDAATYYCQQ
SSSL---
>V156RF-CABD02196545.1-igkv |(4900, 5202)|2.37958834618|(0.954,0.720,0.910)|-1
-SSGDIVMTQTPLSLPVTNGEPASISCRSSQSLVH-SDGNTYLNWIQQRPGQPPR---LL
IYK------V-SNRFSG-VPDRFSGSG--AGTDFTLK------IS-RVEAEDVAVYYCTQ
G------
>V157RF-CABD02196547.1-igkv |(2239, 2541)|2.9888720041|(0.999,0.995,0.995)|-1
-SSGDVVMTQSPLSLPVTLGQPASISCRSSQSLVY-SDGNTYLNWFQQKPGQSPR---RL
IYK------V-SNRDSG-VPDRFSGSG--SGTDFTLE------IS-RVEAEDVGVYYCMQ
G------
>V158RF-CABD02196553.1-igkv |(790, 1090)|3.0|(1.000,1.000,1.000)|-1
-ARCDIQLTQSPTSLSASVGDRVTITCQASQGI------SNNLAWYQQKPGKVPK---LL
IYS------A-SSLQSG-VPSRFSGSG--SGTDFTLT------IS-SLQPEDVATYYCQR
TYNAP--
>V159RF-CABD02196556.1-igkv |(192, 492)|2.99899600001|(1.000,1.000,0.999)|-1
-ARCDIQMTQSPSSLSASVGDRVTITCRASQSV------SNYLSWYQQKPGKAPK---LL
IYA------A-SSLQSG-VPSRFSGSG--SGTDFTLT------IS-SLQPEDFATYYCQH
GYGTP--
>V160RF-CABD02196559.1-igkv |(8610, 8928)|2.66256225323|(0.999,0.825,0.959)|-1
-SSGDIVMTQTPLSLPVTPGQPASISCRSSQSLLDSDDGNTYLYWYLQKPGQSPQ---LL
IYE------V-SNRASG-VPDRFSGSG--SGTDFTLK------IS-RVEAEDVGVYYCMQ
SRELP--
>V161RF-CABD02196901.1-igkv |(2814, 3114)|2.99798400013|(1.000,0.998,1.000)|-1
-DRCDIQMTQSPSSLSASVGGRVTITCRASQGI------SNNLNWYQQKPGKTPK---LL
IYA------A-SSLQSG-IPSRFSDSG--SGTDYTLT------IS-SLQPEDFAAYYCQQ
SDSTP--
>V163RF-CABD02337338.1-trgv |(1057, 1370)|2.97868883957|(1.000,0.998,0.982)|-1
-SQKSSNLEGRTKSVTRQTGSSAEITCDLTVTN------TFYIHWYLHQEGKAPQ---RL
LYYDVST--ARDVLESGLSSGKYYTHT-PRRWSWILR------LQ-NLIENDSGVYYCAT
WD-----
>V165RF-CABD02337341.1-trgv |(2313, 2626)|2.97796052424|(0.999,0.997,0.983)|-1
-SQKSSNLEGRTKSVIRQTGSSAEITCDLDGGS------TGYIHWYLHQEGKAPQ---RL
QYYDSYN--SKVVLESGVSPGKYYTYTST-RKNLRLI------LR-NLIENDSGVYYCAT
WD-----
>V166RF-CABD02379427.1-igkv |(3027, 3327)|3.0|(1.000,1.000,1.000)|-1
-ARCDIQMTQSPSSLSASVGGRVTITCRASQGI------SNNLNWYQQKPGKTPK---LL
IYA------A-SSLQSG-IPSRFSDSG--SGTDYTLT------IS-SLQPEDFAAYYCQQ
SDSTP--
>V167RF-CABD02379503.1-igkv |(6201, 6501)|2.99798400013|(1.000,0.998,1.000)|-1
-ARCDIQMTQSPSSLSASVGGRVTITCRASQDI------SNNLNWYQQKPGKTPK---LL
IYA------A-SSLQSG-IPSRFSDSG--SGTDYTLT------IS-SLQPEDFAAYYCQQ
SDSTP--
>V0RF-ABDC01047890.1-ighv |(234, 540)|2.76727538434|(0.924,0.896,0.954)|1
-VQCNVQLVES-GGGLVQPGGSLTLSCAASRFTF--S--SYAMSWFRQAPGKGME---WV
ALIRND---G-STYYADAVKSEFTISRDNAKNKLYLQ------MN-SLRAEDTALYYCAR
-------
>V2RF-ABDC01116809.1-trbv |(7343, 7638)|2.40844940286|(0.838,0.848,0.752)|1
--LVDAEVTQTPGHLIKRTGEKVLLECSQDM-D------HERMFWYRQDPGLGLR---LI
YFSFD-V--G-SEEKGD-VWEAYSAS-RKQKDRFPLV------LE-SAGTNQTSVYLCAS
R------
>V3RF-ABDC01165520.1-igkv |(7469, 7769)|2.99899200002|(0.999,1.000,1.000)|1
-ARCDIQMTQSPSSLAASVGDTVTISCRASQGI------SSWLSWHQQKPGKPPK---TL
INK------A-SNLESG-VPSRFSGSG--SGTDFTLT------IK-GLQPEDFATYYCQQ
YDSSP--
>V4RF-ABDC01231268.1-ighv |(5361, 5667)|2.99899600001|(1.000,0.999,1.000)|1
-VQCDVQLLES-GGGLVQPGGSLRLSCAASGFTF--S--SYYMHWVRQAPGKGLE---WV
STISS-G--G-STYYADAVKGRFTISRDNGKSSLYLQ------MN-SLKAEDTAVYYCAR
-------
>V6RF-ABDC01231272.1-ighv |(378, 697)|2.96392188321|(0.994,1.000,0.972)|1
-VQCEVQLVES-GGGLVQPGGSLRLSCVASGFTL--T--SYGMNWVRQAPGKGLE---WI
SYIYS----S-STSYADSVKGRFTISTDNGKNSLYLQ------MN-SLRAEDTAMYYCAR
HTVRG--
>V7RF-ABDC01231274.1-ighv |(17, 332)|2.99696400065|(1.000,1.000,0.997)|1
-VQCEVQLVES-GGGLAQPGGSLRLSCAASGFTF--S--SYYMYWVRQAPGKGLE---WV
GFVRNKANGG-TAEYAASVKGRFTISRDDSKSTAYLQ------MN-SLRAEDTALYYCAR
-------
>V8RF-ABDC01231277.1-ighv |(694, 1003)|2.99799600001|(0.999,0.999,1.000)|1
-VQCEVQLAES-GGGLVQPGGSLRLSCAASGFTF--S--NYYMYWVRQAPGKGLE---WI
STISNS--GS-STGYADSVKGRFTTSRDNSKNMLYLQ------MN-SLKAEDTALYYCAR
-------
>V9RF-ABDC01282056.1-ighv |(476, 782)|2.99080001921|(0.999,1.000,0.992)|1
-VQCEVQLVES-GGGLVQPGGSLKLSCAASGFTF--S--SYDMHWVRQAPGKGLE---WV
SVIGI--GG--STYYADAMKGRFTISRDNGKNMLYLQ------MS-SVQAEDTAVYYCTR
-------
>V10RF-ABDC01282057.1-ighv |(6536, 6845)|2.99696400065|(1.000,1.000,0.997)|1
-VQCEVQLVES-GGGLVQPGGSLRLSCAASGFTF--S--SYWMYWVRQAPGKGLE---WV
SRINPD--GG-STNYADAVKGRFTISRDNGKNTLYLQ------MN-SLKAEDTAVYYCAR
-------
>V11RF-ABDC01282063.1-ighv |(1659, 1962)|2.63947015123|(0.948,0.798,0.985)|1
-VQCEEQLVES-GGGLVQPGGSLRLSCAASGFSF--D--DYVMHWIRQAPGKGLE---WI
SYIYS----S-STSYADSVKGRFTISSDNGKNMLYLQ------MN-SLRAEDTAMYYCAR
-------
>V12RF-ABDC01282065.1-ighv |(718, 1027)|2.9618099056|(0.978,1.000,0.986)|1
-VQCEVQLVES-GGGLVPPGGSLRLSCAASGFTF--S--DYWMSWIRQAPGKGLE---WV
GEING--DGG-NTNYADAMKGRFTISRDNSKNTLYLQ------MN-SLRAKDTAVYYCGR
-------
>V13RF-ABDC01296165.1-iglv |(3112, 3422)|2.33910019321|(0.844,0.791,0.750)|1
-SLSQPVVTQP-PSLSASPGASARLTCTLSSGFS---VGSYAISWHQQKPGSPPR---YL
LYYHTDS--N-KHQGSG-VPSRFSGSKDASANAGILH------VS-GLQPEDEADYYCAV
-------
>V14RF-ABDC01296165.1-iglv |(8050, 8360)|2.99186400565|(1.000,0.997,0.995)|1
-SLANFVLTQP-SSVSGSPGQKVTISCTRSSGNI---GS-NYVHWYQQRPGSAPT---TV
IYR------D-DKRPSG-VPDRFSGSSDSSSNSASLT------IS-GLQSEDEADYYCQS
YDASA--
>V15RF-ABDC01296166.1-iglv |(4596, 4906)|2.38156559587|(0.848,0.791,0.776)|1
-SLSQPVVTQP-PSLSASPGASARLTCTLSSGFS---VGSYAISWHQQKPGSPPR---YL
LYYHTDS--D-KHQGSG-VPSRFSGSKDASANAGILH------VS-GLQPEDEADYYCAV
-------
>V17RF-ABDC01314388.1-ighv |(6282, 6597)|2.98410021834|(0.988,1.000,0.997)|1
-VQCEVQLVES-GGGLVQPGGSLKLSCAASGLTF--S--DYWMSWIRQAPGKGLE---WA
GLNRSKAYGG-IAEYAASVKDRFTISRDDSKSTAYLQ------MN-SLKAKDTALYYCVR
-------
>V18RF-ABDC01318810.1-iglv |(15156, 15463)|2.98480001921|(0.993,1.000,0.992)|1
-SWAQSALTQP-PSVSGAPGETVTISCSGSSSNI---G-GYDANWYQQLPGTAPK---LL
IYG------N-SNRPSG-VPARFSGSK--SGSSASLT------IA-GLQAEDEGDYYCSS
WDSSLS-
>V19RF-ABDC01318812.1-iglv |(1658, 1965)|2.22159835383|(0.989,0.683,0.896)|1
-SWAQSALTQP-PSVSGAPGQSVTISCLGSNSNI---G-GNYANWYQQLPGTAPK---TL
IYA------N-SNRPSG-VPARFSGSK--SGSSASLT------IT-ELQAEDEADYYCSA
WDDSLS-
>V22RF-ABDC01342328.1-iglv |(12642, 12952)|2.89560549808|(0.990,0.996,0.926)|1
-SLANFFLTQP-SSVSGSPGQKVTISCTRSSGNI---GS-NYVHWYQQRPGSAPS---TV
IYE------Y-NKRPSG-VPDRFSGSMDSSSNSASLT------IS-GLQSEDEADYYCQS
YDGSY--
>V23RF-ABDC01347843.1-iglv |(8431, 8731)|2.60042597125|(0.887,0.838,0.885)|1
--SVASQPNQV-PAVSVALGQTASITCQGDG--L---RS-YYPGWYQQKPGQAPV---LV
FYG------N-NKRPSG-IPERFSGSK--SGNTAMLT------IS-GAQADDEADYYCQT
WDSTGTH
>V24RF-ABDC01347844.1-iglv |(5493, 5791)|2.48607541711|(0.942,0.733,0.976)|1
--SVASQLTQV-PAVSVALGQTARITCQGDS--L---RS-YYANWYQQKPGQAPV---LL
IYG------D-NQRPSG-IPERFSGSK--SGNTATLT------VS-GAQVEDEADYYCGS
YAGSGT-
>V25RF-ABDC01349227.1-iglv |(6289, 6580)|2.93868832739|(0.993,0.983,0.966)|1
--SVASQVTQV-PAVSVALGQTARITCQGDS--L---SS-YYPGWYQQKPSQAPV---LV
VYG------N-NERPSG-IPERFSGSK--SGNTATLT------IS-GAQVEDEADYYCGS
YAGS---
>V26RF-ABDC01349230.1-iglv |(865, 1165)|2.99092000218|(0.999,0.997,0.995)|1
--SVASQLTQV-PAVSVALGQTASITCQGDG--L---SS-DYANWYQQKPGQAPV---LL
IYG------E-NQRPSG-IPERFSSSD--SGDTATLT------IS-GAQAGDEADYYCQV
WDSENNK
>V27RF-ABDC01351831.1-igkv |(554, 852)|2.42917194745|(0.771,0.958,0.946)|1
-TRCDIQVTQSPSSVSASPGDTVTISCRASQDI------SNRLSWYQQKPGKPPK---AL
IYV------A-SNLHSG-VSSRFSGSG--SGTDYSLT------IR-GLETDDAATYFCRQ
YKIN---
>V28RF-ABDC01351832.1-igkv |(2497, 2812)|2.4666580855|(0.988,0.747,0.946)|1
-SSGDVVMTQTPVSLPVTPGEPASISCRSSQSLL-HSDGKTYLYWYLQKPGQSPQ---LL
IYL------G-FTRASG-VPDRFSGSG--SGTDFTLK------IS-KVEAEDVGVYYCMQ
AIQPP--
>V29RF-ABDC01351835.1-igkv |(461, 776)|2.63677404596|(0.996,0.795,0.995)|1
-SNGEIVMTQTPLSLPVTPGEPASISCRSSQSLLHS-DGNTYLHWYLQKPGQSPQ---LL
IYR------V-SNRFSG-VPDRFSGSG--SGTDFTLK------IS-RVEAEDVGVYYCMQ
GTQTP--
>V30RF-ABDC01351837.1-igkv |(5117, 5415)|2.40344949955|(0.761,0.944,0.920)|1
-TRCDIQVTQSPSSMSVSPGDTVTISCRASQDI------SNRLSWYQQKPGKPPK---PL
IYV------A-SNLHSG-VSSRFSGSG--SGTDYSLT------IR-SLETDDAATYFCRQ
YKNN---
>V31RF-ABDC01351837.1-igkv |(9264, 9579)|2.96216889635|(0.978,0.991,0.995)|1
-SSGDVVMTQTPLSLSVTPGESASISCRASQSIQD-SDGNTYLNWFLQKPGQPPR---RL
IHK------V-SNRDSG-VSDGFSGSG--SGTDFTLK------IS-RVEAEDVGVYYCMQ
ASYFP--
>V34RF-ABDC01359388.1-iglv |(1496, 1806)|2.98309640489|(1.000,0.985,0.999)|1
-SLANFVLTQP-SSVSGSPGQKVTVSCTRSSGNI---GS-NYVYWYQQRPGSAPT---TV
IYR------D-DQRPSG-VPDRFSGSIDSSSNSASLT------IS-GLQSEDEADYYCQS
YDGSA--
>V35RF-ABDC01360510.1-igkv |(1890, 2205)|2.47529157576|(0.867,0.904,0.757)|1
-SSGDIVMTQTPLSLPVTPGEPASISCRSSQSLL-HSNGNTYLQWYLQKPGQSPQ---PL
IYR------V-SNRFSG-VPDRFSGSG--AGTDFTLK------IS-RVEAADVGVYYCMQ
GIQFP--
>V36RF-ABDC01360510.1-igkv |(9535, 9833)|2.31571774549|(0.742,0.925,0.986)|1
-IRCDIQMTQSPSSLAASPGETVTISCRASQGI------NRNLAWYQHKPGNAPK---RL
IYG------A-SNLQSG-VSSRFSGSG--SGTDYSLT------IR-GLETDDVATYFCHQ
YNSN---
>V37RF-ABDC01360510.1-igkv |(13925, 14240)|2.47587028286|(0.976,0.743,0.954)|1
-SRGDIVMTQTPVSLPVTPGEPASISCRSSQSLLH-SNGKTYLQWFLQKPGQSPQ---LL
IYL------G-FTRASG-VPDRFSGSG--SGTDFTLK------IS-KVEAEDVGVYYCMQ
TIQLP--
>V38RF-ABDC01360666.1-igkv |(4785, 5100)|2.98393200206|(0.993,0.997,0.994)|1
-SSGDIVMTQTPLSLPVTPGESASISCRSSQSLLHS-DGKTYLQWFLQKPGQSPQ---LL
IYL------G-FTRASG-VPDRFSGSG--SGTDFTLK------IS-KVEAEDVGVYYCMQ
TIQFP--
>V42RF-ABDC01373300.1-ighv |(1180, 1499)|2.96625728969|(0.994,1.000,0.974)|1
-VQCEVQLVES-GGGLVQPGGSLRLSCVASGFTL--T--SYGMNWVRQAPGKGLE---WI
SYIYS----S-STSYADSVKGRFTISTDNGKNTLYLQ------MN-SLRAEDTAMYYCAR
HTVRG--
>V43RF-ABDC01373301.1-ighv |(8478, 8785)|2.99593600205|(1.000,1.000,0.996)|1
-VQCEVQLVES-GGGLVQPGGSLRLSCAASGFTF--S--SYYMHWVRQAPGKGLE---WV
SRINPDG--G-STIYADAVKGRFTISRDNSKNSLYLQ------MN-SLKAEDTAVYYCA-
-------
>V44RF-ABDC01375549.1-ighv |(174, 483)|3.0|(1.000,1.000,1.000)|1
-VQCEVQLVES-GGGLVQPGGSLRLSCAASGFTF--S--SYWMNWVRQAPGKGLE---WV
ADINGD--GG-STNYADAVKGRFTISRDNAKNSLYLQ------MN-SLRAEDTALYYCAT
-------
>V45RF-ABDC01375549.1-ighv |(8525, 8840)|2.99393200206|(0.999,1.000,0.995)|1
-VQCEVQLVES-GGGLVQPGGSLKLSCVASGFTF--S--DYYMHWVRQAPGKGLE---WV
AFIRNKANGG-TAEYAASVKGRFTISRDDSKSTAYLQ------MN-SLRTEDTAVYYCER
-------
>V46RF-ABDC01377237.1-ighv |(8637, 8946)|2.99899600001|(1.000,0.999,1.000)|1
-VQCDVQLVES-GGGLVQPGGSLRLSCAASGFTF--S--SYWMYWVRQAPGKGLE---WV
SAISGN--GG-STYYADAVKGRFTISRDNGKNTLYLQ------MN-SLKAEDTAVYYCAR
-------
>V47RF-ABDC01377653.1-trav |(1660, 1950)|2.96594800078|(0.987,0.989,0.990)|1
-MSRGEKLEQSP-FLSVQEGDSSVINCTYTETT------STYFYWYKQGPREGLQ---LI
MTIFSYE--D-KK-----QERRLSVLLNKMEKHLSLH------IS-DTQPADSAVYFCAV
S------
>V48RF-ABDC01377655.1-trav |(2230, 2518)|2.36805337278|(0.750,0.838,0.849)|1
--VHSQKIEQNPWALSIQEGETAAVTCNYTSYS------PAFFQWYRQDPEKGLV---FL
LLIRENE--G-EK-----QEGRLKVTFDTKLKQSSFY------IA-DSQPADSAAYLCAA
-------
>V50RF-ABDC01379531.1-trav |(895, 1198)|2.94684837921|(0.993,0.961,0.997)|1
-SGMAQKVTQSQPAMWVQEKEAVTLDCTYDTRD-----STYYLFWYKQPSSGEMI---LL
IRQDSYN--Q-Q----NATEGRYSLNFQKASKSIKLV------IS-ASQVGDSAIYFCAL
SE-----
>V51RF-ABDC01379531.1-trav |(6655, 6946)|2.9929000027|(1.000,0.996,0.997)|1
VRSQQKEVDQTPEFLSVSEGAMASLNCTYSNTA------SRYFFWYRQYSGKGPE---LL
VSIFSTG--D-K------QEGRFTAQLNKASRYVSLV------IR-DSQPSDSATYLCAL
-------
>V53RF-ABDC01384523.1-iglv |(1675, 1975)|2.99598000014|(0.999,0.997,1.000)|1
--SVASQLTQV-PAVSVALGQTASITCQGDG--L---SS-DYANWYQQKPGQAPV---LL
IYG------E-NQRPSG-IPERFSSSV--SGDTATLT------IS-GAQAGDEADYYCQV
WDSENNK
>V54RF-ABDC01388284.1-trav |(3312, 3602)|2.94876429988|(0.990,0.963,0.999)|1
-VRSQQVVEQTPESLVVSEGTTASLSCTYSDTA------SQSFLWYRQYSGKGPE---LL
MFIYSTG--D-K------EEGRFTAQLNKASRNVSLL------IR-DSQPSDSATYLCAV
S------
>V55RF-ABDC01388284.1-trav |(7133, 7430)|2.56461051925|(0.891,0.829,0.863)|1
-GTWAQRVTQPDGHITVSEGDPLELRCNYSSSV------SPYLFWYVQYPNQGLE---LL
LKYTSGN--S-LV--T--GIKSFKAEFNKGETSFHLK------KA-SAHLSDSAQYFCAV
S------
>V57RF-ABDC01391612.1-ighv |(2185, 2509)|2.76718588966|(0.925,0.948,0.899)|1
-AHSEVQLVQS-GAEVKPPGASVKVSCKASGYTF--T--SYAMHWVRQAPGQGLE---YM
GWINTNT--G-GTSYAQKFQGRVTMTRDTSTSTAYME------LS-SLRPEDTAVYYCAR
DTVLQ--
>V59RF-ABDC01394567.1-igkv |(5428, 5726)|2.97348806553|(0.986,0.994,0.994)|1
-TRCDIQMTQSPSSVSASPGETVTISCRASQGI------NNNLVWYQHKPGKPPK---SL
IYG------A-SNLYPG-VLSRFSGSG--SGTDYSLT------IR-GLETDDAATYYCQQ
YNSF---
>V60RF-ABDC01394567.1-igkv |(9543, 9858)|2.77652683325|(0.954,0.884,0.958)|1
-SSGDVVMTQTPLSLPVTPGESVSITCRASQSLQD-SDGNTYLNWVLQKPGQPPK---RL
IYK------V-SNGDNG-VSDRFSGSG--SGTDFTLK------IS-RVEAEDVGVYYCMQ
ASYFP--
>V61RF-ABDC01396012.1-igkv |(1397, 1712)|2.49317723355|(0.988,0.769,0.926)|1
-SSGEIVMTQSPLSLPVTPGEPASISCRSSQSLLH-SNGNTYLQWFLQKPGQSPQ---LL
IYL------G-FTRASG-VPDRFSGSG--SGTDFTLK------IS-RVEAEDVGVYYCMQ
AIQYP--
>V62RF-ABDC01398089.1-iglv |(1263, 1573)|2.54531007134|(0.946,0.841,0.843)|1
-SLANLVLTQP-SSVSGSPGQKVTISCTRSSGDI---GG-YYVHWHQQRPGSAPT---TV
IYE------D-NERPSG-VPDRFSGSIDSSSNSASLT------IS-GLQSEDEADYYCQS
YDDSC--
>V63RF-ABDC01398089.1-iglv |(8544, 8868)|2.42757816242|(0.858,0.809,0.789)|1
-SLSQPVLTQP-PSLSASLGASAGLTCTLSSGTV---VGGYHISWYQQKPGGPPR---YL
LRYYSDS--D-KHQGSG-VPSHFSGSKDASANAGILQ------VS-RLQPEDEADYYCMT
YHANS--
>V64RF-ABDC01399103.1-trbv |(74, 387)|2.27405616613|(0.886,0.686,0.854)|1
--PLDTAVFQTPKYLLTQTGNDVSLKCEQTL-G------YDTMYWYKQDSTKLLK---IM
FIYSN-K--E-KILN-ETASNRFSPE-SPDKAHLNLH------IN-SPEPGDSAVYLCAS
SYDTALQ
>V65RF-ABDC01399713.1-iglv |(4883, 5179)|2.20723855945|(0.988,0.661,0.923)|1
-SWAQSALTQP-PSVSGAPGQSVTISCSN----I---K-GSYAHWYQQLPGTAPK---LL
IYY------N-SDRASG-VPARFSGSK--SGSSASLT------IA-GLQAEDEADYYCQS
YDSSLDA
>V68RF-ABDC01407894.1-ighv |(4990, 5305)|2.99899600001|(1.000,1.000,0.999)|1
-VQCEVQLVES-GGGLAQPGGSLRLSCAASGFTF--S--DYYMSWVRQAPGKGLE---WV
GFIRNKANGG-TAEYAASVKGRFTISRDDSKSTTYLQ------MN-SLRAEDTALYYCAR
-------
>V70RF-ABDC01417489.1-ighv |(3793, 4108)|3.0|(1.000,1.000,1.000)|1
-VQCEVQLVES-GGGLAQPGGSLRLSCAASGFTF--S--DYYMNWVRQAPGKGLE---WV
GVIRNKANGG-TAEYAASVKGRFTISRDDSKSTAYLQ------MN-SLRAEDTALYYCAR
-------
>V71RF-ABDC01417539.1-iglv |(3342, 3652)|2.95681341387|(1.000,0.998,0.964)|1
-SLANIVLTQP-SSVSGSPGQKVTLSCTRSSGDI---GS-SYVSWYQQRPGSAPT---TV
IYE------D-NERPSG-VPDRFSGSIDSSSNSASLT------IS-ALQSEDEADYYCQS
YDDSY--
>V73RF-ABDC01418168.1-iglv |(5505, 5817)|2.95982866804|(0.992,0.994,0.975)|1
-SLANLVLTQP-SSVSGSPGQKVTISCTRSSGDI---GD-AYVTWYQQRPGSAPT---TV
IIG------D-DQRPSR-VPDRFSGSIDSSSNSASLT------IS-GLQSEDEADYYCQS
YGIRNS-
>V74RF-ABDC01418428.1-trav |(328, 621)|2.97295304822|(0.981,0.997,0.997)|1
-VRGGENVGLHPPTLSVQEGDTSVINCSYSDSA------SSYLLWYKQKLGKSPQ---SI
IDIRSNM--G-KK-----QKGRFTVFLSKTAKHLSLH------IA-ATQPGDSAVYFCAE
S------
>V75RF-ABDC01421861.1-ighv |(7067, 7376)|2.99193600205|(0.996,0.996,1.000)|1
-VQCEVQLLES-GGGLVQPGGSLRLSCAASGFTF--S--SYYMSWVRQAPRKGLE---WV
SYINGD--GG-YTNYADAVKGRFTISRDNSKNSLYLQ------MN-NLKAEDTAMYYCAR
-------
>V76RF-ABDC01422153.1-iglv |(2569, 2876)|2.99494800078|(1.000,0.998,0.997)|1
-SWAQSALTQP-PSASGAPGQSVTISCSGSSSNI---G-GNYANWYQQLPGTAPK---LL
IYG------N-SDRPSG-VPARFSGSK--SGSSASLT------IA-GLQAEDEGDYYCSS
WDDSLS-
>V77RF-ABDC01423814.1-ighv |(3316, 3625)|3.0|(1.000,1.000,1.000)|1
-VQCEVQLVES-GGGLVQPGGSLRLSCAASGFTF--S--SYAMSWVRQAPGKGLE---WV
STISNG--GG-STYYTDAVKGRFTISRDNSKNSLYLQ------MN-SLRAEDTALYYCAR
-------
>V80RF-ABDC01440241.1-trav |(2301, 2594)|2.50459485347|(0.865,0.759,0.960)|1
-VRGGENVGLHPPTLSVQEGDTSVINCSYSNSA------SIYFSWYKKELGKGPQ---FI
IDIRSNR--D-KK-----EEQRFTIFVNKTVKHLSLH------IA-GTQPGDSAVYFCAE
S------
>V81RF-ABDC01442374.1-iglv |(1223, 1533)|2.98767605248|(0.999,0.990,0.999)|1
-SLTNLVLTQP-NSVSGSPGQKVTISCTRSTGSI---GG-YFVHWYQQRPGSAPT---TV
IYA------D-DQRPSG-VPDRFSGSIDSSSNSASLT------IS-GLQSEDEADYYCQS
YDDSY--
>V83RF-ABDC01446518.1-igkv |(1290, 1603)|2.58286208414|(0.965,0.901,0.817)|1
-SSGDVVMTQTPLSLPVTPGESASISCRASQSLLY-SDGNTYLNWFLQKPGQPPK---LL
IYK------I-SNRDSG-VSDRFSGSG--SGTDFTLK------IS-RVEAEDVGVYYCTQ
GTKL---
>V84RF-ABDC01449636.1-iglv |(4939, 5239)|2.99699200002|(0.999,0.998,1.000)|1
--SVASQLTQV-PAVSVALGQTARITCQGDS--L---SS-YYPNWYQQKPGQAPV---LL
IYG------E-NQRPSG-IPERFSSSV--SGDTATLT------IS-GAQAGDEADYYCQV
WDSENNK
>V85RF-ABDC01454767.1-ighv |(1191, 1500)|3.0|(1.000,1.000,1.000)|1
-VQCEVQLVES-GGGLVQPGGSLRLSCAASGFTF--S--SYWMNWVRQAPGKGLE---WV
ADINGD--GG-STNYADAVKGRFTISRDNAKNSLYLQ------MN-SLRAEDTALYYCAT
-------
>V86RF-ABDC01466438.1-iglv |(4568, 4875)|2.99494800078|(1.000,0.998,0.997)|1
-SWAQSALTQP-PSASGAPGQSVTISCSGSSSNI---G-GNYANWYQQLPGTAPK---LL
IYG------N-SDRPSG-VPARFSGSK--SGSSASLT------IA-GLQAEDEGDYYCSS
WDDSLS-
>V91RF-ABDC01491653.1-trav |(356, 647)|2.9929000027|(1.000,0.996,0.997)|1
VRSQQKEVDQTPEFLSVSEGAMASLNCTYSNTA------SRYFFWYRQYSGKGPE---LL
VSIFSTG--D-K------QEGRFTAQLNKASRYVSLV------IR-DSQPSDSATYLCAL
-------
>V93RF-ABDC01497734.1-trdv |(531, 837)|2.90491739643|(0.966,0.986,0.955)|1
-STVAQKVTQVETARSTTVGAVVTLNCQYETSGG----AYFFIFWYKQLPSKEMI---FL
LRQGSDL--Y-N----AKDDQRYSVNFQEEANSIDLT------IS-ALRLEDSAKYFCAL
AE-----
>V94RF-ABDC01498106.1-iglv |(348, 644)|2.20723855945|(0.988,0.661,0.923)|1
-SWAQSALTQP-PSVSGAPGQSVTISCSN----I---K-GSYAHWYQQLPGTAPK---LL
IYY------N-SDRASG-VPARFSGSK--SGSSASLT------IA-GLQAEDEADYYCQS
YDSSLDA
>V96RF-ABDC01522041.1-igkv |(82, 382)|2.99899200002|(0.999,1.000,1.000)|1
-ARCDIQMTQSPSSLAASVGDTVTISCRASQGI------SSWLSWHQQKPGKPPK---TL
INK------A-SNLESG-VPSRFSGSG--SGTDFTLT------IK-GLQPEDFATYYCQQ
YDSSP--
>V97RF-ABDC01523330.1-igkv |(1251, 1566)|2.48024629244|(0.983,0.742,0.964)|1
-SSGEIVMTQSPLSLPVTPGEPASISCRSSQSLLH-SNGNTYLYWFLQKPGQSPQ---PL
IYL------V-SNRFSG-VSDRFSGSG--SGTDFTLK------IS-RVEAEDVGVYYCMQ
DLQTP--
>V99RF-ABDC01527872.1-trbv |(327, 624)|2.62968630922|(0.900,0.878,0.860)|1
--PLDTAVFQTPKYLLTQTGNNVSLKCGQTL-G------HDNMYWYKQDATKLLK---IM
FSYNN-Q--E-LMVN-ETASNRFSPE-SPDKAHLNLH------IN-SPEPGDSAVYLCAS
SD-----
>V100RF-ABDC01533414.1-trav |(231, 518)|2.57583704999|(0.831,0.878,0.889)|1
--VNSQQGEENLQALSIQEGENATINCSYTSS-------INNLQWYRQDAGRGPT---LL
ILIRANK--R-EE-----RHGRLTATLNPSIKSSSLI------IT-ASCAADTATYFCAT
D------
>V101RF-ABDC01533415.1-trav |(1221, 1515)|2.98492000218|(0.993,0.997,0.995)|1
-GTDGDSVTQTEGPVTLPEGEALTLNCTYQSNY------AAFLFWYVQFQNKEPE---LL
LKSSSET--Q--E--T--DGRGFQANNNKSDSSFHLK------KP-SVQLSDSAVYFCAM
R------
>V102RF-ABDC01542818.1-trav |(328, 615)|2.96148712253|(0.997,0.972,0.995)|1
-VSSEDKVVQSPPSMAVHEGDSATLTCNYVVSY------FRSLQWYKQEK-NAPV---FL
FTLTSSG--I-EK-----KSGRFSSILD-NKELSTLN------IT-ATQTGDSAIYFCAV
E------
>V105RF-ABDC01570800.1-iglv |(151, 463)|2.74296245654|(0.943,0.964,0.863)|1
-SLANLVLTQP-SSVSGSPGQKVTISCTRSSGDI---GD-AYVNWYQQRPGSAPT---TV
IYG------D-DQRPPR-VPDRFSGSIDSSSNSASLT------IS-GLQSEDEGDYYCQS
YGIRNS-
>V106RF-ABDC01583217.1-igkv |(589, 904)|2.7745050076|(0.995,0.882,0.954)|1
-SSGDIVMTQTPLSLPVTPGEPASISCRSSQSLL-HSDGKTYLYWYLQKPGQSPQ---LL
IYL------G-FTRASG-VPDRFSGSG--SGTDFTLK------IS-KVEAEDVGVYYCMQ
TIQLP--
>V108RF-ABDC01599688.1-igkv |(938, 1236)|2.25855741524|(0.963,0.992,0.643)|1
-IRCDIQMTQSPSSLAASPGETVTISCRASQGI------SNYLSWYQQKPGKPPK---SL
IYG------A-SNLHSG-VSSRFSGSG--SGTDYSLT------IR-GLETDDAATYYCQQ
GHSY---
>V109RF-ABDC01281089.1-trbv |(2653, 2950)|2.5667724743|(0.857,0.880,0.834)|-1
--PMDTGVTQTPRHLVMGMTDKKSLECGQNL-E------HNAMYWYKQSAKKALE---PL
FIFNY-K--K-LYEN-VTVPSRFTPE-YQDNAHFYLH------LD-ALQPEDSATYLCAS
SQ-----
>V111RF-ABDC01281094.1-trbv |(2622, 2919)|2.64833025132|(0.920,0.855,0.893)|-1
--PLDTAVFQTPKYLLTQTGNDVSLKCEQTL-G------HNSMYWYKQDSTKLLK---IM
FSYNN-Q--E-KILN-ETASNRFSPE-SPDKAHLNLH------IN-SPEPGDSAVYLCAS
SD-----
>V112RF-ABDC01281096.1-trbv |(2097, 2394)|2.70374052663|(0.904,0.953,0.863)|-1
--PTDTGVTQTPRHLVMGMTDKKSLKCHQNL-G------HNAMYWYKLSAKKPPE---LM
FYYYY-Q--A-LREN-MTVPSRFSPE-CPDNSHLYLH------LD-ALQPEDSATYLCAS
SQ-----
>V113RF-ABDC01281097.1-trbv |(3192, 3492)|2.94474003277|(0.984,0.976,0.985)|-1
--HTEPGVIQTPSHQVTKKGQEVILRCDPIS-G------HLYFYWYRQISGQKLE---FL
VSFYN-D--N-ISEKSELFTDQFSLK-RPKGSYLALK------IQ-STELEDSAMYFCAS
SK-----
>V114RF-ABDC01281097.1-trbv |(8780, 9077)|2.65327617662|(0.889,0.905,0.863)|-1
--PLDTAVFQTPKYLLTQMGNNVALKCGQTL-G------HDYMYWYKQDSTKLLK---IM
FTYNN-Q--E-LMLN-ETASNRFSPE-SPDKAHLNLH------IN-SPEPGDSAVYLCAS
SD-----
>V115RF-ABDC01345813.1-ighv |(1734, 2043)|2.97700028092|(1.000,0.991,0.987)|-1
-VRCEVQLVES-GGGLVQPGGSLRLSCAASGFTF--S--SYGMHWVRQAPGKGLE---WV
AVIRY--DGS-KQYYADAVKGRFTISRDNSKNMLYLQ------MN-SLKVEDTAMYYCAK
-------
>V116RF-ABDC01345814.1-ighv |(4248, 4551)|2.77211387893|(0.983,0.862,0.984)|-1
-VQCDVQLVES-GGGLVQPGGSLRLSCAASGFTL--S--SYGMNWVRQAPGKGLE---WV
SYIYS----S-STYYADSVKGRFTTSRENSQNMLYLQ------MN-SLRDEDTAMYYCAR
-------
>V117RF-ABDC01345817.1-ighv |(603, 906)|2.95696000066|(0.987,0.986,0.984)|-1
-VQCEVQLVQS-GGGLVQPGGSLRLSCAASGFTF--S--SYGMNWVRQAPGKGLE---WV
SYIYS----S-STYYADSVKGRFTTSRENSQNMLYLQ------MN-SLRDEDTAMYYCAR
-------
>V118RF-ABDC01358932.1-igkv |(615, 919)|2.69115313144|(0.992,0.839,0.955)|-1
-SSGDIVMTQTPLSLPVTLGEPASISCRSSQSLLHS-DGNSYMCWYLQKPGQSLQ---PL
IYR------V-SNRFSG-VPDRFSGSG--SGTDFTLK------IS-RVEAEDVGVYYCMQ
D------
>V119RF-ABDC01368596.1-trbv |(1048, 1348)|2.23941652221|(0.860,0.849,0.668)|-1
--HTDAGVIQTPRHEVTEMGQAVTLKCEPIS-G------HDTLLWYKQTLVQGLE---LL
TYFRS-Q--S-QIDDAGMPKGRFSAE-MPNASFSTLK------IQ-PTELRDSAVYLCAS
SS-----
>V120RF-ABDC01368601.1-trbv |(2109, 2406)|2.95422423344|(0.991,0.978,0.986)|-1
--SVTAGVTQTPRFQILKTGQNMTLMCTQDT-N------HDSMYWYRQDPGLGLR---LI
HYSVA-A--G-TTARGD-IPEGYNVS-RSSTETFSLT------ME-SATPSQTSAYFCAS
SE-----
>V123RF-ABDC01396906.1-ighv |(901, 1210)|2.99596000066|(1.000,0.999,0.997)|-1
-VQCEVQLVES-GGGLVQPGGSLRLSCAASGFTF--D--YYGMNWVRQAPGKGLE---WV
SYISWN--GG-STYYADAVKGRFTISRDNSKNMLYLQ------MN-SLRAQDTAVYYCAR
-------
>V125RF-ABDC01418360.1-iglv |(1917, 2229)|2.65762867815|(0.926,0.861,0.892)|-1
--SVAFQLTQV-PAVSVALGQTASITCQGEG--L---SS-YYVNWYQQKPGQAPV---LI
IYTDIFS--N-SNRPSG-IPERFSSSV--SGDTATLT------IS-GAQAQDEADYYCQV
WVSENNK
>V127RF-ABDC01425625.1-iglv |(109, 419)|2.89555901428|(0.999,0.998,0.922)|-1
-SLANFVLTQP-SSVSGSPGQKVTISCTRSSGNI---GS-YYVQWYQQRPGSAPS---TV
IYK------H-NKRPSG-VPDRFSGSIDSSSNSASLT------IS-GLQSEDEADYYCQS
YDGSY--
>V128RF-ABDC01454736.1-trav |(1674, 1968)|2.97719216959|(0.986,0.997,0.995)|-1
-RTHGNSVTQTEGQVTLSEKAFLHINCTYTSTG------YPSLFWYVQYPGEGPQ---LL
LKAATAN--D--K--G--MNKGFEATYKKETTSFHLE------KA-SVHESDSAVYYCAM
S------
>V129RF-ABDC01455982.1-trbv |(239, 546)|2.84216172767|(0.987,0.985,0.900)|-1
--HTDAGITQNPRHKITEIGKQVTLSCHQND-N------HFYMYWYRQDLGHGLR---LI
YYSVD-A--Q-STDKEE-VAEGYKVS-RSNKEDFLLF------LE-SATRSQTSVYFCAS
SEYTA--
>V130RF-ABDC01465190.1-iglv |(381, 691)|2.98309640489|(1.000,0.985,0.999)|-1
-SLANFVLTQP-SSVSGSPGQKVTVSCTRSSGNI---GS-NYVYWYQQRPGSAPT---TV
IYR------D-DQRPSG-VPDRFSGSIDSSSNSASLT------IS-GLQSEDEADYYCQS
YDGSA--
>V131RF-ABDC01471087.1-ighv |(643, 952)|2.99899600001|(1.000,1.000,0.999)|-1
-VQCEVQLVES-GGGLVQPGGSLRLSCAASGFTF--S--DYWMNWVRQAPGKGLE---WV
AHIRY--DGS-KQYYADAVKGRFTISRDNSKNSLYLQ------MN-SLRAEDTALYYCAR
-------
>V132RF-ABDC01473376.1-trbv |(205, 505)|2.9395031224|(0.989,0.989,0.964)|-1
--SYDAKVTQTPGHLIKEKGQKASMDCTPQQ-G------HNSLYWYQQSQNKELE---FL
VYFEN-K--E-LFDQTEMHKKRFSSK-CPPDSPCRLE------IL-SSEPGDSALYFCAS
SP-----
>V134RF-ABDC01493416.1-ighv |(429, 735)|2.99696400065|(1.000,0.997,1.000)|-1
-VQCDVQLLES-GGGLVQPGGSLRLSCAASGFTL--S--SYYMHWVRQAPGKGLE---WV
STISS-G--G-STYYADAVKGRFTISRDNGKSSLYLQ------MN-SLKAEDTAVYYCAR
-------
>V136RF-ABDC01537099.1-igkv |(1719, 2017)|2.43164248363|(0.771,0.958,0.934)|-1
-TRCDIQVTQSPSSVSASPGDTVTISCRASQDI------SNRLSWYQQKPGKPPK---AL
IYV------A-SNLHSG-VSSRFSGSG--SGTDYSLT------IR-GLETDDAATYFCRQ
YKNN---
>V137RF-ABDC01540867.1-iglv |(1970, 2280)|2.99799200002|(1.000,0.999,0.999)|-1
-SLANFVLTQP-SSVSGSPGQKVTISCTRSSGNI---ES-SYVHWYQQRPGSAPT---TV
IYD------D-NERPSG-VPDRFSGSIDSSSNSASLT------IS-GLQSEDEADYYCQS
YDASA--
>V138RF-ABDC01560090.1-trbv |(258, 558)|2.96894800078|(0.990,0.992,0.987)|-1
--SMDTEVTQSPRYLVKGKEQKTKMDCVPKK-G------HSYVYWYQKKLEEGLK---FL
VYLQD-E--D-IIEKEEIINNRFSAQ-CPKNSPCILE------IQ-STESGDSALYFCAS
SQ-----
>V139RF-ABDC01562688.1-igkv |(1193, 1508)|2.93726255615|(0.996,0.955,0.993)|-1
-SSGDIVMTQTPLSLPVTPGETASISCRASQSIQY-SDGNTYLNWFLQKPGQPPK---RL
IYK------V-SNRDSG-VSDRFSGSG--SGTDFTLT------IS-RVEAEDVGVYYCMQ
ASYYP--
>V140RF-ABDC01582683.1-iglv |(809, 1119)|2.30504905901|(0.957,0.946,0.675)|-1
-SLSQPVLTQP-SSLSASPGASARLTCTLSSGSS---VGSYWINWYQQKPGSPPR---YL
LSYYSDS--Y-KHQVSG-VPSRFSGSKDASANAGILH------VS-GLQPEDEADYYCAV
-------
>V141RF-ABDC01624510.1-iglv |(99, 409)|2.99799200002|(1.000,0.999,0.999)|-1
-SLANFVLTQP-SSVSGSPGQKVTISCTRSSGNI---ES-SYVHWYQQRPGSAPT---TV
IYD------D-NERPSG-VPDRFSGSIDSSSNSASLT------IS-GLQSEDEADYYCQS
YDASA--
>V0RF-JZKE01005121.1-trbv |(3942, 4254)|2.96278066996|(0.981,0.985,0.998)|1
--LVETKVTQTPRHLVKRTGEKVLLKCSQDM-D------HERMFWYRQDPGLGLR---LI
YFSYD-V--D-NDEKGD-VSEGYSAS-RKKKEYFPLV------LE-SASTNQTSVYLCAS
RYPQRCT
>V4RF-JZKE01218258.1-igkv |(171021, 171321)|2.99180001921|(1.000,0.999,0.993)|1
-ARCDIQMTQSPSSLAASLGDTVTITCQASQGI------SNYLSWYQQKPGQSPK---IL
IYG------A-SNLETG-VPSRFSGSG--SGTDFTLT------IS-SLQPEDFATYYCLQ
SYNYP--
>V5RF-JZKE01218259.1-igkv |(864, 1179)|2.58605741288|(0.991,0.779,0.981)|1
-SSGEIVMTQTPLSLPVTLGEPASISCRSSQSLL-HSNGNTYLSWYLQKPGQSPQ---LL
IYL------G-FTRASG-VPDRFSGSG--SGTDFTLK------IS-KVEAEDVGVYYCMQ
TIQVP--
>V6RF-JZKE01218259.1-igkv |(11427, 11740)|2.60959118825|(0.915,0.791,0.980)|1
-SSGDIVMTQTPLSLSVTPGESASISCTASQNIQN-TKGNTYLNWFLQKPGQPPK---RL
IYK------I-SNRDSG-VSDRFSGSG--SGTDFTLE------IS-RVEAEDVGVYYCMQ
ASYY---
>V7RF-JZKE01218269.1-igkv |(713, 1028)|2.26768044397|(0.986,0.656,0.979)|1
-SSGEIVMTQTPLSLPVTPGEPASISCSSSQSLL-HSNGNTYLYWYLQKPGQSPQ---LL
IYR------V-SNRLSG-VPDRFSGSG--SGTDFTLK------IS-RVEAEDVGVYYCMQ
ALQFP--
>V9RF-JZKE01244686.1-ighv |(3631, 3937)|2.997|(0.999,0.999,0.999)|1
-VQCEVQLVES-GGGLVQPGGSLTLSCVASGFTF--S--SYAMCWVRQAPGKGLE---WV
SAIGSG---G-GTYYADAVKGQFTISRDNSKNTLSLQ------MK-SLQAEDTAMYYCAR
-------
>V10RF-JZKE01244690.1-ighv |(27, 336)|2.95823565456|(0.997,0.993,0.971)|1
-VQCEVQLVES-GGGLVQPGGSLRLSCAASGFTF--D--DYAMHWVRQAPGKGLD---WV
SVINWN--GD-YINYADAVKGRFTISRDNSKNSLYLQ------MN-SLRAEDTAVYYCAR
-------
>V11RF-JZKE01244709.1-ighv |(12, 321)|2.99798400013|(1.000,1.000,0.998)|1
-VQCEVQLVES-GGGLVQPGGSLRLSCAVSGFTV--S--NYYMSWVRQAPGKGLE---WV
SYIYSDD--G-DTNYADAVKGRFTTSTDNGKNMLYLQ------MN-SLRTEDTAVYYCAR
-------
>V12RF-JZKE01244710.1-ighv |(1079, 1388)|3.0|(1.000,1.000,1.000)|1
-AQCEVQLVES-GGGLVQPGGSLTLSCAASGFTF--S--DYYMSWVRQAPGKGLE---WV
SRISNTG--G-STWYADAVKGRFTISRDNSKNTLSLQ------MN-SLRAEDTAVYYCAR
-------
>V13RF-JZKE01244715.1-ighv |(308, 614)|2.99899600001|(1.000,0.999,1.000)|1
-VRCEVQLVES-GGGLVQPGGSLTLSCAASGFTF--S--SYAMHWVRQAPGKGLE---WV
SRINSG---G-STSYADAVKGRFTISRDNSKNMLSLQ------MN-SLRSEDTAVYYCTR
-------
>V15RF-JZKE01249931.1-iglv |(10411, 10721)|2.2702434905|(0.904,0.925,0.658)|1
-SLSQPVLTQP-PSLSASPGASARLTCTLSSGTV---VGGYHISWYQQKPGSRPR---YL
LRYHSDS--N-KHQGSG-IPSRFSGSKDASANAGILH------IS-GLQPNDEADYYCLT
-------
>V16RF-JZKE01249932.1-iglv |(5041, 5344)|2.2061254436|(0.710,0.751,0.763)|1
-SLSQPVLTQP-PSASASLGASAKLTCTLSSAH-----SGYTIAWYQQQPGKAPQ---YL
MYVKSDG--R-HSKGDG-IPDHFSGSSSG--ADRYLT------IS-NIQPEDEADYICGA
DY-----
>V17RF-JZKE01249932.1-iglv |(7450, 7753)|2.2061254436|(0.710,0.751,0.763)|1
-SLSQPVLTQP-PSASASLGASAKLTCTLSSAH-----SGYTIAWYQQQPGKAPQ---YL
MYVKSDG--R-HSKGDG-IPDHFSGSSSG--ADRYLT------IS-NIQPEDEADYICGA
DY-----
>V18RF-JZKE01249933.1-iglv |(3726, 4036)|2.79268002839|(0.998,0.949,0.896)|1
-SLSQPVLTQP-PSLSASPGASARLTCTLSSGFS---VGSYAIYWYQQKPGSPPR---YL
LSYYSDS--D-KHQGSG-VPRRFSGSKDASANVGILH------IS-GLQPEDEADYYCMV
-------
>V20RF-JZKE01249944.1-iglv |(1831, 2141)|2.98851611711|(1.000,0.989,1.000)|1
-SLANVVLTQP-SSVSGSPGQKVTISCTRSSGNI---GD-NYVHWYQQRPGSAPT---TV
IYA------D-DKRPSG-VPDRFSGSIDSSSNSASLT------IS-GLQSEDEADYYCQS
YGSSA--
>V24RF-JZKE01249956.1-iglv |(5127, 5437)|2.56363522562|(0.816,0.992,0.900)|1
-SGAQSALTQP-SSVSGNPGQSVTISCAGTSSDV---GKYNYVSWYQQHPGTAPK---LL
IYN------V-NTRTSG-IPDRFSGSK--SGNTASLT------IS-GLLAEDEADYHCSS
YRSGNA-
>V25RF-JZKE01249957.1-iglv |(3969, 4267)|2.96472550775|(1.000,0.987,0.980)|1
--SVASQLTQV-PAVSVALGQTARITCQGDS--L---SS-YYPNWYQQKPGQAPV---LV
IYG------N-SNRPSG-IPERFSSSD--SGTTATLT------IS-GAQAGDEADYYCGS
YAGSDT-
>V26RF-JZKE01249957.1-iglv |(9221, 9531)|2.5537557606|(0.813,0.995,0.899)|1
-SGAQSALTQP-SSVSGNPGQSVTISCAGTSSDI---GKYNYVSWYQQHPGTAPK---LL
IYN------V-NTRASG-IPDRFSGSK--SGNTASLT------IS-GLLAEDEADYHCSS
YRSGNA-
>V28RF-JZKE01249958.1-iglv |(6051, 6351)|2.36862908524|(0.913,0.693,0.942)|1
--SVASQLTQV-PAASVALGQTARITCQEDG--I---RS-FFTNWYQQKPGEAPV---LL
IYD------S-SKQPSG-IPERFSGSK--SGTTATLT------IS-GAQAGDEADYYCQS
FDISSNY
>V29RF-JZKE01249959.1-iglv |(447, 745)|2.92186884012|(0.992,0.950,0.987)|1
-SVASYELTQP-PSVSVSPGQTARITCGGNN--I---GN-KYAYWHQQKAGQAPV---LI
IYS------D-SNRPSG-IPERFSGSN--SGNTATLT------IS-GTQAGDEADYYCQV
WDGSN--
>V30RF-JZKE01255160.1-ighv |(7108, 7423)|2.994900005|(1.000,1.000,0.995)|1
-VQCEVQLVES-GGGLVQPGGSLTLSCAASGFSF--S--NYWMHWVRQAPGKGLE---WV
SSIGND---G-STSYADAVKGRFTISRDNDKNTLSLR------MN-SLRAEDTAVYYCAR
ETV----
>V31RF-JZKE01296733.1-igkv |(5866, 6179)|2.96821230726|(0.994,0.995,0.980)|1
-SSGDIVMTQTPLSLSVTPGESASISCTASQSILH-TDGNTYLNWLLQKPGQPPK---RL
IYK------I-SNRDSG-VSDRFSGSG--SGTDFTLE------IS-RVEAEDVGVYYCMQ
ASYY---
>V32RF-JZKE01097728.1-igkv |(2698, 3010)|2.95338267424|(0.997,0.963,0.998)|-1
-ACGDIVMTQSLRSLAVSPGERVTIDCKSSQSLL--SNNKNYLAWHQQKPGQAPK---LL
IYW------A-STRASG-VPDRFSGSG--SGTDFTLT------IS-SVQAEDVAVYYCQQ
YHSTP--
>V33RF-JZKE01143868.1-trav |(15192, 15493)|2.94692000218|(0.983,0.985,0.979)|-1
-SSVAQTVTQSQPEMSVQEAGTVTLDCTYATSD-----SNYYLFWYKQPPSRQMI---LI
IRQEAYK--Q-Q----NATENRFSVNFQKAAKSFSLE------IS-DSQLEDAAMYFCAF
M------
>V34RF-JZKE01143869.1-trav |(6274, 6564)|2.97775601537|(0.989,0.994,0.995)|-1
-VSSEDKVIQSPSSLAVHEGDSATLTCNYEVSY------FQSLQWYKQEK-NAPT---FL
FTLTSSG--I-EK-----KSGRLSSILDNKELLSTLN------IT-ATQTRDSAIYFCAV
E------
>V42RF-JZKE01143873.1-trdv |(6157, 6456)|2.95063465422|(0.975,0.999,0.979)|-1
-STVAQKVTQYQATTSMTEGQAVTLNCQYETSST-----TYFICWYKQLPSKEMI---FL
LRQGSTS--Q-N-----AKDGRYSVNFRKEAKSINLT------IS-ALRLEDSAKYFCAL
WD-----
>V44RF-JZKE01143874.1-trdv |(2471, 2770)|2.93540816598|(0.982,0.984,0.970)|-1
-STVAQKVTQAQTATTRTVGQAVTLNCQYEASWS-----SYYIYWYKQLPSNEMI---FL
LRQYSGD--Q-N-----AKNGRYSINFQKEAKSIDLT------IS-ALRLEDSAKYFCAL
WD-----
>V46RF-JZKE01143890.1-trav |(1103, 1400)|2.99199600001|(0.997,0.998,0.997)|-1
-RSNGDSVTQTEGTVTLPEGAPVILNCTYETTY-----SVSYLFWYVQYLNQSPQ---LL
LKSSTEN--Q--R--G--ENRGFQANLVKSDKSFHLE------KS-SLRMSDSAVYYCAL
S------
>V48RF-JZKE01143891.1-trav |(8677, 8980)|2.98202424585|(0.987,0.997,0.999)|-1
-PSMAQKVTQAQPEISVVEKESVTLDCVYETRD-----PTYYLFWYKQPPSGEMI---FL
IRQDSFN--E-K----NETKDRYFLNLQKSTSSISLT------IT-ASQLMDSAVYFCAL
RE-----
>V49RF-JZKE01143893.1-trav |(6613, 6900)|2.95098000014|(0.984,0.985,0.982)|-1
--VNSQQGEENPQALSIQEGENATINCSYKSS-------ISNLQWYRQDSGRGLT---LL
ILIRANK--R-EE-----HHGRLTVTLNTSIKSSSLI------IT-ASCAADSATYFCAT
D------
>V50RF-JZKE01143895.1-trav |(12286, 12579)|2.88979292281|(0.981,0.924,0.999)|-1
-VSGGENVGLHPPTLNVQEGDTSVINCTYSNSA------SNYFPWYKQELGKGPQ---FI
IDIRSNM--D-NK-----QEQRFTVLLNKTAKHLSLH------IA-GTQAGDSAVYFCAE
S------
>V51RF-JZKE01143895.1-trav |(15624, 15933)|2.99799600001|(0.999,1.000,0.999)|-1
-AGIAQKVTQSQPAMSVQEKEAVTLDCTYDTSTS---VTSYTLFWYKQPSSGEMI---LL
IRQDSYN--Q-Q----NATEGRYSLNFQKASKSIKLV------IS-ASQVGDSAIYFCAL
SE-----
>V52RF-JZKE01143895.1-trav |(22481, 22772)|2.991|(0.997,0.997,0.997)|-1
VRSQQKEVEQTPESLSVSEGATASLNCTYSNTA------SQYFTWYRQYSGKGPE---LL
VSIYSNG--D-K------EEERFTVHLNMASRYVSLL------IR-DSQPSDSATYLCAV
-------
>V54RF-JZKE01143896.1-trav |(1244, 1537)|2.96845211916|(0.992,0.981,0.996)|-1
-VRGGENMGLHPPNLSVQEGDTSVINCTYSNSN------SDYFCWYKQEPGKGPQ---FI
MDIRSNK--D-KK-----QEGRFTILLNKMAKHLSLH------IA-GTQAGDSAAYLCAE
S------
>V55RF-JZKE01143896.1-trav |(8327, 8630)|2.98767605248|(0.999,0.990,0.999)|-1
-SGIAQKVTQVQPAMLVQEKEAVTLDCTYDTSD-----SRYTLFWYKQPSSGEML---LL
IRQDSYN--Q-Q----NATEGRYSLNFQKANKSIKLV------IS-ASQVGDSAIYFCAL
ME-----
>V56RF-JZKE01143896.1-trav |(15626, 15938)|2.96428365264|(0.997,0.999,0.971)|-1
VRSQQKEVEQTPESLSVSEGATASLNCTYSNTA------SQYFAWYRQYSGKGPE---LP
VSIYSTG--D-KE-----EEGRFTVQLNKGSRYVSLL------IR-DSQPSDSATYLCAV
STQCSP-
>V57RF-JZKE01143902.1-trav |(453, 744)|2.98996800026|(0.998,0.996,0.996)|-1
VRSQQKEVEQTPESLSVSEGATASLNCTYSNTA------SQYFAWYRQYSGKGPE---LL
VFIYSTG--D-K------EEGRFTVQLNKASRYVSLL------IR-DSQPSDSATYLCAV
-------
>V58RF-JZKE01143903.1-trav |(641, 935)|2.9909280013|(0.995,0.998,0.998)|-1
-RTHGDSVTQMEGQVTLSEEAFLTINCTYTATG------YPALFWYVQYPGEGPQ---LL
LKATKAN--D--K--G--INKGFEATYKRETTSFHLE------KA-SVHESDSAVYYCAL
S------
>V59RF-JZKE01143910.1-trav |(6899, 7192)|2.93374224752|(0.973,0.967,0.996)|-1
-VSGKNQVEQGPQSLIIPEGENCTLQCNYTVSP------FNNLRWYKQETGRGPV---SL
IIMNYSK--S-K-----ESNGRYTATLDASAKQSSLH------IT-ASQLSDSASYICVA
S------
>V61RF-JZKE01143910.1-trav |(50038, 50331)|2.7269732542|(0.988,0.833,0.998)|-1
-VSGGENVGLHPPTLNVQEGDTSVINCTYSDSA------SIYFPWYKQELGKGPQ---FI
TDIRSNM--D-NK-----QEQRFTVLLNKTAKHLSLH------IA-GTQAGDSAVYFCAE
S------
>V62RF-JZKE01143910.1-trav |(57835, 58138)|2.99174403277|(1.000,0.992,1.000)|-1
-AGVAQKVTQSQPAMLVQEKEAVTLDCTYDTSD-----SSYGLFWYKQPSSGEML---LL
IRQDSYN--Q-Q----NATEGRYSLNFQKARKSIHLV------IS-ALQLGDSAIYFCAL
SE-----
>V63RF-JZKE01143913.1-trav |(1691, 1985)|2.5984018452|(0.842,0.851,0.994)|-1
-RTYGNTVTQGEGQVTLSEGAFLTINCTYTSTG------YPTLFWYVQYPGEGPQ---LF
LKATQAN--D--K--A--INKGFEATYKRETTSFHLE------KA-SVHESDSAMYYCVL
S------
>V65RF-JZKE01143915.1-trav |(12659, 12952)|2.95882119202|(0.976,0.993,0.992)|-1
-VSRGENVEQRPSTLHVQEGDTSVINCTYSDSA------SSYFPWYKQELGKGPQ---LF
IDIRSNL--D-KK-----QDQRITLLLNRMTKHLSLH------IA-ATQPGDSAVYFCVA
S------
>V66RF-JZKE01143915.1-trdv |(19560, 19869)|2.37544392829|(0.846,0.790,0.773)|-1
-SSITQKVTQDQPAMLVQEKEAVTLDCTYDTSTS---VNNFALFWYKQPSSGEML---LL
IRQDSYN--Q-Q----NATEGRYSLNFQKAKKSIHLL------IS-ASQLEDSAMYFCAL
KK-----
>V70RF-JZKE01143916.1-trav |(38882, 39172)|2.96697252412|(0.995,0.979,0.994)|-1
-ISRGEKVEQSP-FLSVQEGDSSVINCTYTEST------STYFYWYKQGPGEGPQ---LL
MTILSSM--D-KK-----QEQRLSVLLNKREKHLSLH------IS-DTQPGDSAVYFCAV
S------
>V71RF-JZKE01143916.1-trav |(40477, 40765)|2.94994028297|(0.976,0.987,0.988)|-1
--VNSQKIEQNPRALNIHEGETAAVTCNYTSYS------PAFLQWYRQDPERGLV---FL
LLIRENE--G-E-----KQEGRLKVTFDTTHKQSSFY------IT-DSQPADSATYLCAA
-------
>V72RF-JZKE01143916.1-trav |(59581, 59872)|2.98770402421|(0.992,0.997,0.999)|-1
--SHGDSVTQTDGQMLLTEGDSLIVNCSYETRQ------YPALFWYVQYPGEGLQ---LL
LKAAKAN--D--K--G--INKGFEATYNRETTSFHLE------KA-SVHVSDSAVYYCAL
S------
>V74RF-JZKE01196378.1-trbv |(847, 1154)|2.95296034001|(0.992,0.984,0.978)|-1
--HTDAGITQNPRFRVTETGKQVTLRCHQTD-K------YDYMYWYRQDLGRGLR---LI
HYSYG-V--Q-RTDKGE-FSEGYNVS-RSDMEDFPLT------LE-SATPSQTSVYFCAI
SDSTA--
>V75RF-JZKE01235368.1-ighv |(1130, 1439)|3.0|(1.000,1.000,1.000)|-1
-VQCQVQLVES-GGGLVQPGGSLTLSCAASGFTF--S--SYWMYWVRQAPGKGLE---WV
SSINYGG--G-STYYADGVKGRFTISRDNSKNTLSLQ------MN-SLRAEDTAVYYCAK
-------
>V76RF-JZKE01238797.1-iglv |(185, 497)|2.99289600501|(0.999,1.000,0.994)|-1
-SWAQSALTQP-PSVSGAPGQTVTISCTGSSSNI---GGGYYASWYQQLPGSAPK---LL
IYY------D-SDRPSG-IPARFSGSK--SGSSASLT------IT-GLQAEDEADYYCAA
WDTSLSG
>V77RF-JZKE01238797.1-iglv |(4422, 4732)|3.0|(1.000,1.000,1.000)|-1
-SLANFVLTQP-SSVSGSPGQKVTISCTRSSGNI---GD-NYVSWYQQRPGSAPT---TV
IYD------D-NQRPSG-VPDRFSGSIDSSSNSASLT------IS-GLQSEDEADYYCQS
YDSSA--
>V78RF-JZKE01238799.1-iglv |(2255, 2565)|2.99899600001|(1.000,1.000,0.999)|-1
-SLANFVLTQP-SSVSGSPGQKVTISCTRSSGNI---GS-YYVHWYQQRPGSAPT---TV
IYN------D-NQRPSG-VPDRFSGSIDSSSNSASLT------IS-GLQSEDEADYYCQS
YDSSA--
>V79RF-JZKE01238800.1-iglv |(606, 916)|2.89227037078|(1.000,0.949,0.960)|-1
-SLSQPVLTQP-PSLSASPGASARLTCTLSSGFS---VGSYAIYWYQQKPGSPPR---YL
LSYYSDS--S-KHQGSG-VPSRFSGSKDASANAGILH------IS-GLQPEDEADYYCMA
-------
>V81RF-JZKE01255181.1-ighv |(445, 754)|3.0|(1.000,1.000,1.000)|-1
-VQCEVQLVES-GGGLVQPGGSLTLSCAASGFTF--S--DYYMHWVRQAPGKGLE---WV
SYISSSG--G-STYYADAVKGRFTISRDNSKNTLSLQ------MN-SLRAEDTAVYYCVR
-------
>V82RF-JZKE01255182.1-ighv |(1026, 1335)|2.99899600001|(1.000,0.999,1.000)|-1
-VQCEVQLVES-GGGLVQPGGSLTFSCAASGFTF--S--SYNMHWVRQAPGKGLE---WV
SYISNT--GG-STYYAEAVKGRFTISRDNSKNTLSLQ------MN-SLRAEDTAVYYCAG
-------
>V83RF-JZKE01278248.1-ighv |(4833, 5139)|2.99593600205|(1.000,0.996,1.000)|-1
-VQCEVQLVES-GGGLIQPGGSLTLSCAASGFTI--S--SYYMDWVRQASGKGLE---WV
SAISS-G--G-STYYADAVKGRFTISRDNSKNTLSLQ------MN-SLRAEDTAVYYCAR
-------
>V84RF-JZKE01278249.1-ighv |(3382, 3691)|2.65034577942|(0.933,0.808,0.978)|-1
-IQCEVHLVES-GGGLVQPGASLKLSCAASGFSF--S--SYGMNWVRQAPGKGLE---WV
SHIDYDA--G-STYYADAVKGRFTISRDNSKNTLSLQ------MN-SLRAEDTAMYYCAR
-------
>V85RF-JZKE01278253.1-ighv |(3391, 3700)|2.9771523093|(0.996,1.000,0.982)|-1
-VQCEVQLVES-GGGLVQPGGSLRLSCAASGFTF--S--DYYMHWVRQAPGKGLE---WV
SYIYSDG--G-DTNHADAVKGRFTTSTDNGKNMLYLQ------MN-SLRAEDTAVYYCAR
-------
>V86RF-JZKE01278255.1-ighv |(2535, 2844)|3.0|(1.000,1.000,1.000)|-1
-VQCEVQLVES-GGGLVQPGGSLTLSCAASGFTF--S--SYWMYWVRQAPGKGLE---WV
SSINSGG--G-STYYADAVKGRFTISRDNSKNTLSLQ------MN-SLRAEDTAVYYCAK
-------
>V87RF-JZKE01278267.1-ighv |(5092, 5401)|2.99798400013|(1.000,1.000,0.998)|-1
-VQCEVQLVES-GGGLVQPGGSLRLSCAASGFTF--S--SYGMNWARQAPGKGLE---WV
STINYDG--S-STSYADAVKGRFTISRDNSKNTIYLQ------MN-SLRAEDTAVYYCAK
-------
>V88RF-JZKE01278268.1-ighv |(3308, 3617)|3.0|(1.000,1.000,1.000)|-1
-VQCEVQLVES-GGGLVQPGGSLTLSCVASGFTF--S--SYYMHWVRQAPGKGLE---WV
SYINTAG--G-STSYADAVKGRFTISRDNSKNTLSLQ------MN-SLRAEDTAVYYCAR
-------
>V89RF-JZKE01278271.1-ighv |(48, 354)|3.0|(1.000,1.000,1.000)|-1
-VQCEVQLVES-GGGLAQPGGSLTLSCAASGFTF--S--NYGMHWVRQAPGKGLE---WV
SAISSG---G-STYYADAVKGRFTISRDNSKNTLSLQ------MN-SLRTEDTAVYYCAK
-------
>V90RF-JZKE01278271.1-ighv |(7402, 7711)|2.99899600001|(1.000,1.000,0.999)|-1
-VQCEVQLVES-GGGLVQPGGSLTLSCAASGFTF--S--SYDMSWVRQAPGKGLE---WV
AVIWAD--GS-KQYYADSVKGRFTISRDNGKNMLYLQ------MN-SLRAEDTAMYYCAS
-------
>V91RF-JZKE01278273.1-ighv |(24, 333)|2.994900005|(1.000,0.995,1.000)|-1
-VQCEVQLVES-GGGLVQPGGSLTLSCAASGFTF--S--SYVMYWFRQAPGKGLE---WV
SRISSSG--G-STSYADALKGRFTISRDNSKNTLSLQ------MN-SLRAEDTAVYYCAK
-------
>V92RF-JZKE01278276.1-ighv |(456, 765)|3.0|(1.000,1.000,1.000)|-1
-VQCEVQLVES-GGGLVQPGGSLKLSCAASGFTF--S--SYGMNWVRQAPGKGLE---WI
SHINYDA--G-STYYADAVKGRFTISRDNSKNTLSLQ------MN-SLKAEDTAVYYCAK
-------
>V93RF-JZKE01278277.1-ighv |(1432, 1741)|2.99593600205|(1.000,0.996,1.000)|-1
-VQCEVQLVES-GGGLVQPGGSLTLSCAVSGFTV--S--SYGMNWVRQAPGKGLE---WV
SYIYSDG--G-STNYADAVKGRFTTSTDKSKNTLSLQ------MN-SLRAEDTAVYYCAR
-------
>V94RF-JZKE01278602.1-ighv |(13, 322)|3.0|(1.000,1.000,1.000)|-1
-VQCEVQLVES-GGGLVQPGGSLTLSCAASGFTF--S--SYWMSWVRQAPGKGLE---WV
STISHTG--G-STYYADALKGRFTISRDNSKNTLSLQ------MN-SLRTEDTAVYYCAR
-------
>V95RF-JZKE01278602.1-ighv |(4600, 4909)|2.99089600501|(0.999,0.994,0.998)|-1
-VQCEVQLVES-GGGLVQPGGSLRLSCVASGFTF--S--SYVMYWFRQSPGKGLE---WV
SRISSSG--G-STSYADALKGRITISRDNSKNTLSLQ------MN-SLRAEDTAVYYCAI
-------
>V96RF-JZKE01278605.1-ighv |(401, 710)|3.0|(1.000,1.000,1.000)|-1
-VQCEVQLVES-GGGLVQPGGSLTLSCAASGFTF--S--DYYMSWVRQAPGKGLE---WV
SRISSDG--T-STYYADAVKGRFTISRDNSKNTLSLQ------MN-SLQAEDTAVYYCAR
-------
>V97RF-JZKE01278607.1-ighv |(3705, 4014)|2.99899200002|(0.999,1.000,1.000)|-1
-VQCEVQLVES-GGGLVQPGGSLTLSCAASGFSF--S--SYWMHWVRQAPGKGLE---WV
SYINSAG--G-STYYADAVKGRFTISRDNSKNTLSLQ------MN-SLRAEDTAVYYCAR
-------
>V98RF-JZKE01278609.1-ighv |(657, 966)|3.0|(1.000,1.000,1.000)|-1
-VQCEVQLVES-GGGLIQPGGSLTLSCAASGFSF--S--SYRMNWVRQAPGKGLE---WI
SYISSGG--G-STYYADAVKGRFTISRDNSKNTLSLQ------MN-SLRAEDTAVYYCAR
-------
>V99RF-JZKE01278610.1-ighv |(3774, 4083)|3.0|(1.000,1.000,1.000)|-1
-VQCEVQLVES-GGGLVQPGGSLTLSCAASGFSF--S--SYDMSWVRQAPGKGLE---WV
SYINYGG--G-STSYADAVKGRFTISRDNSKNTLSLQ------MN-SLRADDTAVYYCAS
-------
>V100RF-JZKE01278610.1-ighv |(12525, 12834)|2.991900005|(0.999,0.994,0.999)|-1
-VHCEVQLVES-GGGLVQPGGSLTLSCAASGFTV--S--SYCMSWVRQAPGKGLE---WV
SYIYSDG--G-SRNYADAVKGRFTTSTDNGKNTLYLQ------MN-SLRAEDTALYYCAR
-------
>V101RF-JZKE01278611.1-ighv |(583, 892)|2.99696400065|(1.000,1.000,0.997)|-1
-VQCEVQLVES-GGGLVQPGGSLRLSCVASGFTF--S--DYYMSWVRQAPGKGLE---WV
LYIYSDD--G-DTSYADAVKGRFTISTDNGKNMLYLQ------MN-SLRAEDTAVYYCAR
-------
>V102RF-JZKE01278611.1-ighv |(6883, 7192)|2.99899600001|(1.000,0.999,1.000)|-1
-VQCEVQLVES-GGGLVQPGGSLKLSCAASGFTF--S--SYGMNWVRQTPGKGLE---WI
SYINSAG--G-STSYADAVKGRFTISRDNSKNTLSLQ------MN-SLRAEDTAVYYCAR
-------
>V103RF-JZKE01278614.1-ighv |(2171, 2477)|3.0|(1.000,1.000,1.000)|-1
-VQCEVQLVES-GGGLVQPGGSLTLSCAVSGFTV--S--SYDMSWIRQASGKGLE---WV
SYISY-G--G-STYYADAVKGRFTISRDNGKNTLSLQ------MN-SLRTEDTAVYYCAR
-------
>V104RF-JZKE01294660.1-trbv |(1696, 1993)|2.51937680314|(0.799,0.925,0.981)|-1
--PVEAQVTQTPRNRITETGKNVTVTCSQNM-N------HEYMSWYRQDPGLGLK---LI
YYSAK-V--E-FVTKGD-APDGYTAS-RREKPSFSLN------VE-STRTSQTALYLCAS
SL-----
>V106RF-JZKE01294668.1-trbv |(161, 463)|2.97567605248|(0.995,0.995,0.986)|-1
--HTDAGITQNPRFRVTETGKQVTLRCHQTD-K------HDYMYWYRQDLGHGLR---LI
HYSIG-A--G-NTEKGQ-FSDGYSVS-RSNEQNFSLT------LE-SATPSQTSVYFCAS
SDST---
>V108RF-JZKE01294668.1-trbv |(32591, 32891)|2.24363196736|(0.804,0.790,0.696)|-1
--SSGEEVTQTPGHLLKGKGQKVKMYCVPIK-G------HRYVFWYQQILGKEFK---FL
FSFQD-K--E-IFEETEMLKQRFSAE-CPQNLPCSLE------IQ-TAELQDSAVYLCAS
SE-----
>V110RF-JZKE01294669.1-trbv |(2779, 3079)|2.58042323844|(0.820,0.949,0.903)|-1
--HMGAGVSQSPRHKITMRGQNVTLRCDPIS-G------YTFLFWYQQTLGQGPQ---LL
IYFQD-K--D-VVDKSKLTGDRISAE-RPEGSFSRLK------IQ-PAEQGDSAVYLCAS
SL-----
>V112RF-JZKE01294669.1-trbv |(21670, 21960)|2.93696800026|(0.979,0.977,0.981)|-1
----DAGVIQSPRHLIKGKQETTILKCYPLS-G------HDTVYWYQQAPGQGLQ---FL
ISYYE-K--M-QREKGN-IPQRFSGQ-QFADYHSELN------LS-SLEPGDSALYLCAS
SL-----
>V113RF-JZKE01294672.1-trbv |(4950, 5250)|2.46787897521|(0.807,0.816,0.854)|-1
--HTGAGVSQSPRHKVTERGQNVSLRCDPIS-G------HVSLFWYRQTPGQGLQ---LL
IYFQG-A--D-ATDKSGLPSDRISAE-RPEGSFSTLK------IQ-PAEQGDSAVYLCAS
SL-----
>V115RF-JZKE01294690.1-trbv |(9942, 10239)|2.93587652911|(0.972,0.988,0.977)|-1
--PLDTAVFQTPKYLVSQMGNNVSLKCKQTL-G------HNTMYWYKQDSEKLLK---IM
FAYNN-K--E-LILN-ETVSNRFSPA-SPDKAHLNLH------IE-SPEPDDSAVYLCAS
SY-----
>V116RF-JZKE01294692.1-trbv |(174, 471)|2.97880001921|(0.991,0.998,0.990)|-1
--PVDTGITQTPRHLVMGMTDKKSLKCEQNL-G------HDAMYWYKQSAKKPPE---LM
FYYNY-Q--E-LREN-LTVSSRFSPE-CPDSSHLYLH------LD-ALQPDDSAMYLCAS
SQ-----
>V117RF-JZKE01294699.1-trbv |(3116, 3413)|2.52564005313|(0.838,0.841,0.847)|-1
--PMDTAVFQTPKYLLTETGNNVSLKCEQTL-G------NDAMYWYKQDSEKLLK---IM
FTYNN-K--E-LILN-ETVSNRFSPG-SPDKAHLNLH------IE-SPEAGDSAVYLCAS
SY-----
>V118RF-JZKE01294700.1-trbv |(9965, 10265)|2.36726948684|(0.795,0.730,0.915)|-1
--HTEPGVIQTPTYQVIEKGQEVILRCDPIS-G------HLYFYWYQQIWGQKVE---FL
VSFYN-D--N-ISEKSKIFKDRFSLE-RPRGSYLALK------IQ-STEPEDSATYLCAS
SP-----
>V1RF-JYKQ01003191.1-trgv |(1259, 1575)|2.97481638724|(1.000,0.990,0.986)|1
-SQKSSNLEGRTKSVTRPTGSSAEITCDLPEVS------SFYIHWYLHQEGKAPQ---RL
LYYDSSN--SRVVLESGISSGKYDSYGSTRRRNLRLR------LQ-NLIENDSGVYYCAN
WD-----
>V2RF-JYKQ01003191.1-trgv |(5603, 5916)|2.98553608204|(1.000,0.996,0.990)|1
-GQKSSNLEGITKSVTRPTGSSAEITCDFSGDS------NFYIHWYLHQEGKVPQ---RL
LYYDVSN--SRDVLESGLSPGKYYTHT-RTRWSWILI------LR-NLIENDSGVYYCAN
WD-----
>V3RF-JYKQ01005758.1-ighv |(2900, 3215)|2.96554104219|(0.996,0.977,0.994)|1
-VKCEAQLMES-GGGLVQPGGSLRLSCAASGFTF--S--SYGMSWVHQTPGKGLE---WV
GLIRNKADGE-TTDYAASVKGRVTISRDDSKSITSLQ------MN-NLKTEDTAVYYCAR
-------
>V4RF-JYKQ01005763.1-ighv |(2160, 2469)|2.5503924745|(0.961,0.861,0.832)|1
-VQCEVQLVES-GGGLVQPGASLRLCCAASGFTF--S--STRMNWIRQSPGKKLE---WV
ADIKYD--GS-EKYYVDSVKGRFTISRDNAKNSLYLQ------MN-SLRAEDTAVYYCVR
-------
>V5RF-JYKQ01005769.1-ighv |(5096, 5411)|2.59039451875|(0.823,1.000,0.986)|1
-VQCEVQLVES-GGGLAQPGGSLRLSCAASGFTF--S--DHYMDWVRQAPGKGLE---WV
GRIRNKANGY-TTEYAASVKGRFTISRDDSKNTLYLQ------MS-SMKTEDTAVYHCAR
-------
>V6RF-JYKQ01005770.1-ighv |(7257, 7566)|2.99798400013|(1.000,0.998,1.000)|1
-VQCEVQLVES-GGGLVQPGRSLRLSCATSGFTF--S--NYWMFWVRQAPGKGLE---WV
SSIS-G-SSS-STYYPDSVKGRFTISRDNAKNMLYLQ------MN-SLRAEDTAVYYCAR
-------
>V7RF-JYKQ01005771.1-ighv |(8999, 9305)|2.22527103553|(0.780,0.660,0.948)|1
-VQCEVQLVEY-GGGLVQRGGSLRLSC---GFTF--S--VHFMSWVHQAPAKGLE---WV
GFMRNKANGG-TTEYATSVKGRSTISRADSKSMASLQ------MS-SLNTEDTAVYYCAR
-------
>V9RF-JYKQ01005772.1-ighv |(36472, 36781)|2.84477343928|(0.994,0.894,0.996)|1
-VQGEVQLVES-GGGLAKPGGSLRLSCAASGFTF--S--SYWMHWVRQAPGKGLE---WI
SAINSA--GS-SIYYADSVKGRFTISRENAKNTLYLQ------MN-SLRAEDTAVYYCAK
-------
>V10RF-JYKQ01005773.1-ighv |(3691, 4000)|2.2037736937|(0.914,0.859,0.664)|1
-VQCEVQLVES-GGGSIQPGASLRLCCAAPGFTF--S--STRMNWIRQAPGKKLE---WV
ADIKYD--GS-EKYYVDSVKGRFTISRDNAKNSLSLQ------MN-SLRAEDTAVYYCVR
-------
>V11RF-JYKQ01005773.1-ighv |(11326, 11632)|2.38643035002|(0.903,0.965,0.694)|1
--CAEVQLVQS-GAEVKRPGESLRISCKTSGYSF--T--SNWISWVRQMPGKGLE---WM
GMIDPSD--S-DTRYSPSFQGQVTISADKSISTTYLQ------WS-SLKASDSATYYCAK
-------
>V12RF-JYKQ01005774.1-ighv |(1635, 1941)|2.38643035002|(0.903,0.965,0.694)|1
--CAEVQLVQS-GAEVKRPGESLRISCKTSGYSF--T--SNWISWVRQMPGKGLE---WM
GMIDPSD--S-DTRYSPSFQGQVTISADKSISTTYLQ------WS-SLKASDSATYYCAK
-------
>V13RF-JYKQ01005774.1-ighv |(20410, 20718)|2.37103669184|(0.958,0.736,0.880)|1
-VQGGVQLVES-EGNFVQPGGSLRLSCAVSGFTF--S--SYDLDWIRHAPGKGLE---WV
SGISIA---G-STYYANSVKGRFAISIDNAKNTLYLQ------MN-SLIAEDTAIYYCVS
E------
>V14RF-JYKQ01005774.1-ighv |(31522, 31837)|3.0|(1.000,1.000,1.000)|1
-VQCEVQLVES-GGGLVQPGGSLRLSCAASGFTF--S--NYWMNWVRQAPGKGLE---WV
GFIKNKADGG-TAAYAESVKGRFTISRDDSKNTLYLQ------MN-SLKTEDTAVYYCTR
-------
>V15RF-JYKQ01005777.1-ighv |(21925, 22238)|2.96874467291|(0.994,0.999,0.977)|1
-VQCEVQLVES-RGGLVQPGGSLRLSCAASGFTF--S--DYYMHWVRQAQGKGLE---WV
GLIRNKANSY-TTEYAAAVKGRFTISRDDSKNTLYLQ------MS-SLKTEDTALYYCT-
-------
>V16RF-JYKQ01005777.1-ighv |(46860, 47174)|2.38953632408|(0.896,0.726,0.878)|1
-VFSQVTLKES-GPALVKPTQTLTLTCTFSGFSL--STSGMRVSWVRQPPGKALE---WL
ARIDWD---D-DKYYSTSLKSRLTISKDTSKNQVVLT------MT-NMDPVDTATYYCAR
G------
>V17RF-JYKQ01005784.1-ighv |(1524, 1833)|2.99593600205|(1.000,0.996,1.000)|1
-VQCEVQLVES-GGGLIQPGGSLRLSCAASGFTF--S--SYYMYWIRQAPGKGLE---WV
SAINTG--GG-STWYADSVKGRFTISRENAKNTLYLQ------MN-SLRAEDTAVYYCAK
-------
>V18RF-JYKQ01005787.1-ighv |(1654, 1969)|2.99698000014|(1.000,0.998,0.999)|1
-VQCEVQLVES-GGGLVQPGGSLRLSCAASGFTF--S--DHYMDWVRQAPGKGPE---WV
GFIRNKARGG-TAEYAASVKGRFTISRDDSKNVTYLQ------MS-SLKTEDTAVYYCTT
-------
>V19RF-JYKQ01005787.1-ighv |(14728, 15050)|2.32736340553|(0.910,0.809,0.748)|1
-VLSQVTLKES-GPALVKPTQTLTLTCTVSGFSL--TTSGVGVSWIRQAPGKALE---WL
AHIYWT---D-SKYYSPSLKSRLTISKDTSKNQVVLT------IT-NTDPVDTATYYCAR
GAQ----
>V20RF-JYKQ01005788.1-ighv |(4951, 5260)|2.46917775608|(0.991,1.000,0.725)|1
-VLSQVQLQES-GPGLVKPSETLSLTCAVSGGSI--S-S-YWWGWIRQPPGKGLE---WI
GIIYGSG--G-SNYLNPSLKSRVTLSVDTSKNQFSLK------LS-SVTAADTAVYYCAR
-------
>V21RF-JYKQ01005789.1-ighv |(14344, 14653)|3.0|(1.000,1.000,1.000)|1
-VQCEVQLVES-GGGLVQPGGSLRLSCAASGFTF--S--SYGMHWARQAPGKGLE---WV
SAINNGG--G-STWYADSVKGRFTISRENAKNTLYLQ------MN-SLRAEDTAVYYCAK
-------
>V23RF-JYKQ01029805.1-trbv |(2386, 2683)|2.23602934331|(0.948,0.956,0.643)|1
--SLDTAVSQTPKYLVTQTGKNEYLKCEQNL-G------HDTMYWYKQDSKKLLN---IM
FSYNN-K--Q-LIIN-ETVPNRISPD-SPDKAHLNLH------IT-SLELGDSAVYFCAS
SQ-----
>V24RF-JYKQ01029805.1-trbv |(7011, 7308)|2.96668003481|(0.985,0.993,0.989)|1
--PIDTGITQTPKHLVMGMTNKKSLKCEQHM-G------HRAVYWYKQKAKKPPE---IM
FMYNY-E--T-LSIN-ESVPSRFSPE-CSKSSLLYLH------LR-ALQPEDSALYLCAS
SQ-----
>V27RF-JYKQ01029807.1-trbv |(18088, 18388)|2.47114567491|(0.920,0.947,0.735)|1
--HTEPEVTQTPSHQVTQMGQEVILRCVPIS-N------HFYFYWYRQILGQKVE---FL
VSFVN-D--E-ISDKSEMFDDRFSVE-RPDGSNFTLK------IK-STKLEDSAMYFCAS
SE-----
>V28RF-JYKQ01029807.1-trbv |(28941, 29238)|2.994900005|(1.000,1.000,0.995)|1
--PTDTGVTQTPKHLVMGMTNKKSLKCEQHL-G------HNAMYWYKQKAKKPPE---LM
FVYQY-E--K-LSIN-ESVPSRFSPE-CSKSSLLYLH------LQ-ALQPEDSALYLCAS
SQ-----
>V29RF-JYKQ01029807.1-trbv |(39844, 40134)|2.63739703336|(0.907,0.826,0.933)|1
----EAGVTQTPRSLIKMRGQQVTLSCSPIS-G------HRSVSWYQQTPGQGLQ---FL
FEYFS-E--T-QREKGK-FPSRFSGR-QFSNSRSEMN------VS-TLELEDSALYLCAS
SL-----
>V30RF-JYKQ01029809.1-trbv |(772, 1069)|2.99698000014|(0.998,1.000,0.999)|1
--PANADVTQSPKFQILKTGQSMTLQCAQDM-N------HNSMYWYQQDPGMGLR---LI
HYSAT-E--D-TTDPGE-VPDGYSVS-RLNKKEFLLK------LE-SAAPSQTSVYFCAS
SE-----
>V31RF-JYKQ01029809.1-trbv |(15370, 15683)|2.95954165691|(0.999,0.994,0.970)|1
--SLDTAVSQTPKYLVTQTGKNESLKCEQNL-G------HDTMYWYKQDSKKLLK---IM
FSYNN-K--E-PILN-ETVPNRFSPK-SPDKAHLNLH------IK-SVELGDSAVYFCAS
SQDIALQ
>V32RF-JYKQ01029809.1-trbv |(18791, 19104)|2.54492721525|(0.856,0.943,0.792)|1
--PMDTGVTQTPRHLVMGMTNKKSLKCEQHL-G------HNAMYWYKQKARKPPE---LM
FIYNF-K--E-PAEN-NSVPSRFVPE-CPDSSLFYLH------LH-ALQPEDSALYLCAS
SQDTALQ
>V33RF-JYKQ01029809.1-trbv |(33264, 33561)|2.99696400065|(1.000,1.000,0.997)|1
--PVNAGVTQTPKFQILKTGQNMTLKCAQDM-N------HNYMYWYRQDPGMGLR---LI
HYSAG-E--G-STEKGE-VPDGYNAS-RLNPQNFLLR------LE-SAAPSQTSMYFCAS
SE-----
>V34RF-JYKQ01029809.1-trbv |(37007, 37307)|3.0|(1.000,1.000,1.000)|1
--HTGAGVSQSPRNKVTEEGKDVVLRCDPIS-G------HTALYWYRQSLGKGLE---FL
IYFQG-N--D-APDKSGLPSGRFSAE-RTEGSVSTLK------IQ-RTEQGDSAVYLCAS
SL-----
>V35RF-JYKQ01029811.1-trbv |(568, 868)|2.97979201242|(0.990,0.994,0.996)|1
--HTGAGVSQFPSNKVTEKGKDVALRCDPIS-G------HAVLYWYRQNLGQGLE---FL
IYFQG-T--G-AVDDSGLRSDRFSAT-RPEGSVSTLK------IR-HTEQGDSATYFCAS
SL-----
>V36RF-JYKQ01029811.1-trbv |(5612, 5908)|2.37019663819|(0.948,0.747,0.857)|1
--PVDTGVTQSPTHLIKTRGQQVTLRCSPIS-G------HTSVSWYQQAPGQGPQ---FI
FEYAN-E--L-RTSEGN-FPHRFSGR-QFRDYHSEMN------VS-ALELGDSALYLCAS
SL-----
>V37RF-JYKQ01029811.1-trbv |(8288, 8584)|2.99498400013|(0.999,0.997,0.999)|1
--SVDSGVTQTPKHLITAIGQQVTLRCSPRS-G------DLSVYWYQQSLGQGLQ---FL
VQYYN-G--E-EREKGN-ILERFSAQ-QFPDLHSELN------LS-SLELGDSALYFCAS
SL-----
>V38RF-JYKQ01041707.1-ighv |(10254, 10563)|2.94526188151|(0.995,0.977,0.976)|1
-AHSQVQLVQS-GPEVKQPGASVKVSCKASGYSF--T--TYGMNWVRQAPGQGLE---WM
GWMNTYT--G-NPTYAQGFTERFVFSMDTSVSTVYLQ------IS-SLKAEDTAMYYCAR
-------
>V39RF-JYKQ01041713.1-ighv |(30683, 30998)|3.0|(1.000,1.000,1.000)|1
-VQCEVQLVES-GGGLVQPGGSLRLSCAASGFTF--S--SSAMHWVRQASGKGLE---WV
GYIRSKSNNY-ATQYAASVKGRFTISRDDSKNTLYLQ------MS-SLKTEDTAMYYCTT
-------
>V40RF-JYKQ01041713.1-ighv |(41631, 41955)|2.78775890313|(0.893,0.979,0.966)|1
-VQCEVQLVES-GGGLVQPGESLRLSCAASGFTF--S--DYYMDWVCQAQGRGWSGLATQ
TLFLNKANSY-TTEYAASVKGRFTISRDDSENTLYLQ------TS-SMNTEDTAVYYCAR
-------
>V41RF-JYKQ01041713.1-ighv |(51469, 51784)|3.0|(1.000,1.000,1.000)|1
-VQCEVQLVES-GGGLVQPGGSLRLSCAASGFTF--S--DHYMQWVRQAPGKGLE---WV
GFIRSKAYGG-TAEYAASVKGRFTISRDDSKSIASLQ------MS-SLKTEDTAVYYCAR
-------
>V43RF-JYKQ01041713.1-ighv |(71051, 71357)|3.0|(1.000,1.000,1.000)|1
-VQCEVQLVES-GGGLVQPGGSLRLSCAASGFTF--S--SYGMNWVRQAPGKGLE---WV
SYISSG---G-STYYADSVKGRFTISRDNSKNTLSLQ------MN-SLRAEDTAVYYCAG
-------
>V44RF-JYKQ01041718.1-ighv |(4152, 4461)|2.75594651426|(0.960,0.987,0.855)|1
-AHSQVQLVQS-GAEIKQPGASVKLSCKASGYTF--T--SYYMHWVRQAPGQGLE---WI
GLISPYN--G-NKGYAQNFQGRVTITADTSTSTGYME------LS-SLRSEDTAVYYCTR
-------
>V45RF-JYKQ01041718.1-ighv |(11509, 11818)|2.97129965252|(1.000,0.974,1.000)|1
-VQGEVQLVES-RGGLAKPGGSLRLSCAASGFTF--S--GYNMYWVRQASGKGLE---WV
SGISY--TGG-STWYADSVKGRFTISRENAKNTLYLQ------MN-SLRAEDTAVYYCAR
-------
>V46RF-JYKQ01041718.1-ighv |(32027, 32336)|2.99899600001|(1.000,1.000,0.999)|1
-VQCEVQLVES-GGGLVKPGASLRLSCAASGFTF--G--DYTMHWVRQAPGKGLE---WV
SYISSA--SS-YIHYADSVKGRFTISRDNAKNSLYLQ------MN-SLKTEDTAVYYCTR
-------
>V48RF-JYKQ01051981.1-igkv |(559, 859)|3.0|(1.000,1.000,1.000)|1
-ARCDIQMTQSPSSLSASVGDRVTITCQASQGI------SSWLAWYQQKPGKAPK---LL
LYK------A-SGLQSG-VPSRFSGSG--SGTEFTLT------IS-SLQPEDFATYYCQQ
FSSAL--
>V50RF-JYKQ01051984.1-igkv |(27105, 27405)|2.96417355698|(0.997,0.976,0.993)|1
-ARCDIQMNQSPSSLSASVGDTVTITCRANQGI------SNNLAWYQQKPGKVPQ---LL
IYY------A-SSLASG-IPSRFSGSG--SGTEFTLT------IS-SLQPEDFAAYYCLQ
HNSYP--
>V51RF-JYKQ01051985.1-igkv |(4005, 4303)|2.39550077441|(0.971,0.937,0.718)|1
-TTVEIVMTQSPATLSLSPGERATLSCRASQSV------SSYLSWYQQKPGQAPR---IL
IYG------A-SSRATG-IPDRFSGSG--SGTDFTLT------IS-SLEPEDVGVYFCPQ
SSNW---
>V52RF-JYKQ01052451.1-igkv |(138345, 138660)|2.30347518505|(0.822,0.716,0.810)|1
-TSGDILLTQTPLSLPVTTGEPASISCRSSQSLLHS-NENTYLHWYLQKPGQSPQ---LL
IYE------V-SNRASG-VPERLSGSG--SDTDFTLK------IN-LVEAEDVGVYYCMQ
TTQWP--
>V53RF-JYKQ01052451.1-igkv |(143240, 143558)|2.97854805197|(0.998,0.990,0.991)|1
-SSGDIVMTQTPLSLPVTPGEPASISCRSSQSLLDSEDGNTYLDWYLQKPGQSPQ---LL
IYE------V-SNRASG-VPDRFSGSG--SDTDFTLK------IS-RVEAEDVGVYYCMQ
ALQNP--
>V55RF-JYKQ01054925.1-trav |(5041, 5338)|2.90424535942|(0.994,0.931,0.995)|1
-GLRAQLVTQPEDQVTVAEGNPLTVKCTYSVSG------NPYLFWYVQYPNQGLQ---FL
LKYITGD--N-LV--K--GSYGFEAEFNKSQTSFHLK------KP-SALVSDSALYFCAV
R------
>V56RF-JYKQ01054933.1-trav |(11630, 11920)|2.99598000014|(0.999,1.000,0.997)|1
-MSRGEDVEQSL-FLSVREGDISVINCTYTDSS------STYLYWYKQEPGAGLQ---LL
IYILSNM--D-LK-----RDQRVTVLLNKKDKHLSLR------IA-DTQTEDSAIYFCAE
S------
>V57RF-JYKQ01054940.1-trav |(18103, 18397)|2.99899600001|(1.000,1.000,0.999)|1
-GINGDSVVQTEGQVLLSEGNSLIVNCSYESTQ------YPSLFWYVQYPGEGPQ---LL
LKAMKDN--D--K--E--SNKGFEATYRKETTSFHLE------KD-SVQESDSAVYFCAL
S------
>V58RF-JYKQ01054940.1-trav |(31345, 31638)|2.99392000218|(0.996,0.998,1.000)|1
-GSGKNQVEQSPQSLIILEGKNCTLQCNYTVSP------FNNLRWYKQDTGKGPI---SL
TIMTFSE--N-TK-----SNGRYIATLDADTKQSSLH------IT-AAQLSDSASYICVV
S------
>V59RF-JYKQ01054940.1-trav |(46970, 47276)|2.99174403277|(1.000,1.000,0.992)|1
VWSQQKEVEQDPGPFSVPEGATVTFNCTYSNSA------SQSFFWYRQDSRKEPK---LL
MSAYS----S-G-----NEDGRFTAQLNRASQYISLL------IR-DSQLSDSATYLCAV
YTQCSP-
>V60RF-JYKQ01054940.1-trav |(52430, 52727)|2.97097652411|(0.996,0.980,0.996)|1
-GTRAQSVTQLDSQVSVSEGAPVLLRCNYSSSV------PPYLFWYVQYPNQGLQ---LL
LKYTSGT--T-LV--K--GINGFEAEFKKSETSFHLR------KA-SAHVSDAAEYFCAV
S------
>V61RF-JYKQ01054942.1-trav |(16188, 16478)|2.98442416586|(0.999,0.987,0.999)|1
--VNGENVEQHPSILSVQEGDSSVIKCTYSDSA------SNYFPWYKQELGKEPQ---FI
IDIRSNA--H-EK-----KDQRITVLLNKTAKHFSLH------IT-ETQPGDSAVYFCAA
S------
>V62RF-JYKQ01054942.1-trav |(38704, 38992)|2.99899600001|(1.000,0.999,1.000)|1
VWS-QQKVEQNSGPLSVPEGAIASLNCTYSDRG------SQSFFWYRQYSGQSPE---LL
MSTYSSG--D-K------EDGRFTAQLNRASQYVSLL------IR-DSQPSDSATYLCAV
-------
>V63RF-JYKQ01054942.1-trav |(45190, 45487)|2.71929316693|(0.971,0.831,0.995)|1
-GTKAQSVTQLDSQVSVSEGVPVLLRCNYSSSF------PPTLFWYVQYPNQGLQ---LL
LKYTSGT--T-LV--K--GINGFEAEFKKSETSFHLT------KA-SAHVSDAAEYFCAV
N------
>V64RF-JYKQ01054942.1-trav |(64627, 64920)|2.98521630725|(1.000,1.000,0.986)|1
-VSRGESVGLHLPTVSVQEGDNSVINCTYSDSA------SDYFLWYKQESGKGPQ---SI
IDIRSNM--A-KR-----QGQRLTVFLNKTMKHLSLQ------IA-ATEPGDSAVYFCAE
N------
>V65RF-JYKQ01054942.1-trav |(70517, 70818)|2.91572292008|(1.000,0.999,0.934)|1
-SGIAQKITQTQPAMFVQEKEAVTLDCTYDTSD-----QSYGLFWYKQPSSGEMI---FL
ILQMSYD--K-Q----NATEGRYSLNFQKARKSVNLV------IS-ASQVGDSAMYFCAM
R------
>V66RF-JYKQ01054942.1-trav |(88856, 89150)|3.0|(1.000,1.000,1.000)|1
-RTRGDSVTQMEGPVTLSERAFLTINCTYTATG------YPSLFWYVQYPGEGPQ---LL
LKATKTD--E--K--G--SNKGFEATYRKETTSFHLK------KD-SVQESDSAVYFCAL
S------
>V67RF-JYKQ01054942.1-trav |(113522, 113815)|2.99899200002|(0.999,1.000,1.000)|1
VWSQQKEVEQNPGPLSVPEGATASLNCTYSNSA------FQYFMWYRQYSRKGPQ---LL
IYIYSSG--N-K------EDGRFTAQVDKSSKYISLF------IR-DSQPNDSATYFCAM
S------
>V69RF-JYKQ01054953.1-trav |(3497, 3784)|3.0|(1.000,1.000,1.000)|1
--VNSQQGEEDPQTLSIQEGENATMNCSYKTS-------INNLQWYRQDSGRSLV---QL
ILIRSNE--R-EK-----NSGRLRVTLDTSKKSSSLL------IT-ASRAADTASYFCAT
D------
>V70RF-JYKQ01054957.1-trav |(3986, 4277)|2.99399200002|(0.998,0.999,0.997)|1
-RTNGDSVTQTEGPVTLPERAALTLNCTYQTSY------SAFIFWYVQYPNKEPE---LL
LKSS-EN--Q--E--T--NSRGFQASHVKSDSSFHLE------KP-SVQLSDSAVYYCVL
R------
>V71RF-JYKQ01054957.1-trav |(7206, 7509)|2.95284837921|(0.995,0.999,0.963)|1
-SSMAQKVTQAQTEISVVEKEDVTLDCVYETRD-----TTYYLFWYKQPPSGELV---FL
IRQNSFD--E-Q----NEINGRYYSKFQKSTSSFNLT------IT-ASQVVDSAVYFCAL
NE-----
>V72RF-JYKQ01054957.1-trav |(42945, 43232)|2.9057880379|(0.985,0.976,0.950)|1
-LSGEDQVTQSPEALSLQEGDSSSLNCSYTVSG------LRGLLWYRQDPGKGPE---FL
FILYSAG--E-EK-----EKERLKATLTKK--ESFLH------IT-GPKPEDSATYLCAV
Q------
>V74RF-JYKQ01062966.1-iglv |(12021, 12331)|2.99296800026|(0.999,0.997,0.997)|1
-SWAEVVFTQP-HSVSGSPGQTVTISCTRSSGSI---DS-SYVYWYQQRPGSAPT---TV
IYS------D-DQRPSG-VPDRFSGSIDSSSNSASLT------IS-GLKSEDEADYYCQS
YDSSS--
>V75RF-JYKQ01067073.1-ighv |(701, 1007)|2.2543615622|(0.721,0.943,0.931)|1
-VRCEVQRVES-GGGLVQPGGSLRLSCAASGFTI--S--SSWMNWDFQAPGKGLE---CV
SHIISG---G-STDYPDSFKGRFTISRDNTKNTLYVQ------KN-SLRAEDMAVYYCAR
-------
>V76RF-JYKQ01067101.1-ighv |(5042, 5351)|2.9929000027|(1.000,0.997,0.996)|1
-TQSQVQLVQS-GAEVKKPGASVKLSCKASGYTF--T--SYGINWVRQAPGQGLE---WM
GWINPSN--G-NTGYAQKFQGRVTMTRDTSTSTAYME------LN-SLRSDDTAVYYCAR
-------
>V77RF-JYKQ01067101.1-ighv |(30146, 30461)|2.95598664203|(0.999,0.976,0.984)|1
-VLSQVQLQES-GPGVVKPSETLSLTCAVSGASI--SSGYYYWSWIRQPPGKGLE---WI
GGIYSNS--G-STNYNPSLKSRVTISKDTSKNQFSLK------LS-SVTAADTAVYYCAR
-------
>V78RF-JYKQ01079834.1-igkv |(1757, 2043)|2.54116317779|(0.949,0.768,0.947)|1
-----IVLTQSPATLALSPGEGATLSCRASQSV------SRYSSWYQQKPGQAPR---LL
IYG------A-SSRATG-IPARFSGSG--SGTDFTLT------IS-SLEPEDVAVYFCQQ
SNNW---
>V79RF-JYKQ01086555.1-ighv |(11851, 12160)|2.94907315918|(0.981,0.970,1.000)|1
-VQCEVQLVES-GGGVVQPGGSLRLLCAASGFTF--D--DYAMHWVRQAPGKGLE---WV
SAISWD--GD-STYYADSVKGRFTISRDNAKNSLYLQ------MN-SLRAEDTAVYYCAR
-------
>V80RF-JYKQ01114545.1-iglv |(3565, 3871)|2.99798400013|(1.000,1.000,0.998)|1
--DSETVVTQE-PSLSVSSGGTVTLTCGLSSGSV---STSNYPSWYQQTPGQAPR---TL
IYR------T-NTRPSG-VPDRFSGSI--LGNKAALT------IT-GAQADDESDYYCML
YMGSGI-
>V82RF-JYKQ01131090.1-trbv |(8544, 8841)|2.29891640466|(0.885,0.658,0.972)|1
--HRDAEITQSPRYKVTETGRKVTLTCHQTW-N------HNNMFWYRQDLGHGLR---LI
YYSAG-A--S-IIDKGE-VPDGYVVS-RSKTEDFPLT------LE-SATRSQTSVYFCAS
SE-----
>V84RF-JYKQ01131090.1-trbv |(36297, 36594)|3.0|(1.000,1.000,1.000)|1
--PVNAGVTQTPKFQILKTGQSMTLQCAQDM-N------HDCMYWYRQDPGMGLR---LI
HYSVG-E--G-STDKGE-VPDGYNVT-RSNTEDFPLR------LE-SAAPSQTSVYFCAS
SY-----
>V85RF-JYKQ01131090.1-trbv |(40488, 40788)|2.97002987349|(0.997,0.975,1.000)|1
--HTGAGVSQSPRYKVTKRGQDVALRCDPIS-G------HDYLYWYQQAPGQGPA---FL
TYFQN-D--A-QRDKSGLPNDRFSAE-MPEGSVSTLK------IQ-RTEQGDSAVYLCAS
SL-----
>V86RF-JYKQ01131090.1-trbv |(48415, 48705)|2.43418180669|(0.950,0.896,0.749)|1
----DAGVTQSPTHLIKTRGQQVTLRCSPIS-G------HTSVYWYQQALGQGLQ---FI
LWYDE-E--E-QRDRGT-FPHRFSGR-QFPNYSSELN------VN-ASEMGDSALYLCAS
SL-----
>V88RF-JYKQ01131090.1-trbv |(60130, 60430)|2.99389600501|(1.000,0.995,0.999)|1
--HTGAGVSQSPRYKVTKRGQDVALRCDPIS-G------HVALYWYRRTLGQGPE---FL
TYFQN-D--A-QPDKSGLPSDRFSAE-RPEGSVSTLK------IQ-RTEQGDAAVYLCAS
SL-----
>V89RF-JYKQ01131091.1-trbv |(1114, 1410)|2.68405999734|(0.972,0.829,0.962)|1
--SVDGGVTQSPRHLIKTTGQQVTLRCSPIS-G------HTSVSWYQQALGQGPQ---FI
FEYYE-E--K-ERERGN-FPDRFSGH-QFPNYSSELN------VN-ALEAGDSALYLCAS
SL-----
>V90RF-JYKQ01131092.1-trbv |(9, 305)|2.68405999734|(0.972,0.829,0.962)|1
--SVDGGVTQSPRHLIKTTGQQVTLRCSPIS-G------HTSVSWYQQALGQGPQ---FI
FEYYE-E--K-ERERGN-FPDRFSGH-QFPNYSSELN------VN-ALEAGDSALYLCAS
SL-----
>V91RF-JYKQ01131092.1-trbv |(3324, 3621)|2.97841612211|(0.995,1.000,0.984)|1
--LVNAGVTQTQKFQVLKTGQSMTVQCAQDM-N------HDCMYWYRQDPGMGLR---LI
HYSDA-A--G-TTDKRE-VPSGYNVS-RLNIEDFPLR------LE-SAAPSQTSVYICAS
SY-----
>V93RF-JYKQ01131093.1-trbv |(13830, 14126)|2.21081778804|(0.936,0.832,0.694)|1
--SVDAGVTQSPTHLIRKRGQQVTLRCSPIS-G------HNTVSWYKRALGQGPQ---FI
FQYYE-K--E-ERERGN-FPGRFSGH-QFPNYSSELN------VN-ASEMGDSALYLCAS
SL-----
>V94RF-JYKQ01131093.1-trbv |(22892, 23189)|2.99799200002|(1.000,0.999,0.999)|1
--PGNAGVTQTPKFQILKTGQSMTLQCAQDM-N------HNYMSWYRQDPGVGLR---LI
HYSVG-A--G-VTDKGE-VSNGYNVS-RLNTEDFPLS------LE-SAASSQTSVYFCAS
SY-----
>V95RF-JYKQ01131094.1-trbv |(5376, 5676)|2.99080001921|(0.999,0.992,1.000)|1
--HTGAGVSQFPRYRVTKRGQDVTLRCDPIS-G------HEYLYWYQQAPGQGPE---LL
TYFQN-D--A-QLDKSGLPSDRFSAE-RTEGSVSTLK------IQ-RTEQGDSAVYLCAS
SL-----
>V96RF-JYKQ01131094.1-trbv |(13819, 14115)|2.97974403277|(0.996,0.988,0.996)|1
--PVDTGVTQSPTHLIKTRGQQVILRCSPIS-G------HSSVYWYQQALGQGPQ---FI
FEYYE-K--E-ERGRGN-FPDRFSGR-QFPNYSSELN------VS-ALLLGDSALYLCAS
SL-----
>V97RF-JYKQ01131094.1-trbv |(21287, 21594)|2.97399200002|(0.992,0.991,0.991)|1
--PGNADVTQTPKFQVLKTGQSLTLQCAQDM-N------HNYMYWYRQDPGMGLR---LI
HYSVG-A--G-ITDKGE-VPNGYNVF-RLNTEDFPLR------LE-SAALSQTSVYFCAS
SDTTV--
>V98RF-JYKQ01131095.1-trbv |(9158, 9454)|2.96748712253|(0.999,0.974,0.997)|1
--PVDTGVTQSPTHLIKMRGQQVTLRCSPIS-G------HSSVSWYQQALGQGPQ---FI
FQYYE-K--E-ERGRGN-FPDRFSGR-QFPNYSSELN------VS-ALLLGDSALYLCAS
SL-----
>V99RF-JYKQ01131096.1-trbv |(2555, 2846)|2.98874403277|(0.999,0.999,0.991)|1
----NAGVTQTPKFQVLKTGQSMIVQCAQDM-K------HDYMFWYRQDPGMGLR---LI
YYSVT-A--G-ITTKGE-VPNGYNVS-RINTEDFLLR------LE-SAAPSQTSVYFCAS
SY-----
>V100RF-JYKQ01131098.1-trbv |(4345, 4645)|2.98660007999|(0.999,0.989,0.999)|1
--HTGAGVSQSPRYKVIKKGQDVALRCDPIS-G------HAGLYWYQQALGQGPE---FL
TYFNY-Q--A-QPDKSGLPNDRFSAE-RHEGSVSTLT------IQ-RTEQQDSAVYLCAS
SL-----
>V102RF-JYKQ01131101.1-trbv |(9053, 9353)|2.99393200206|(0.999,0.995,1.000)|1
--HTDARVSQDPRHKITKTGQNVSFKCVPIS-E------HNRLYWYRQTLGQGPE---FL
TYFQN-E--A-QQDRSGLFSDRFSAE-RPEGSISTLM------IQ-HTEQGDSAVYLCAS
SL-----
>V103RF-JYKQ01131101.1-trbv |(23980, 24277)|2.99392000218|(1.000,0.998,0.996)|1
--HMDAGITQSPRHKITETGTPVTLRCHQTE-N------HRYMYWYRQDLGRGLR---LI
HYSYG-V--E-DTDKVE-VSDGYSVS-RSKTEDFLLT------LE-SATRSQTSVYFCAS
SE-----
>V105RF-JYKQ01131102.1-trbv |(2948, 3248)|2.96854104219|(0.997,0.995,0.978)|1
--HTDAGVIQSPRHKVTEMGKEVTLRCEPIS-G------HTYLFWYRQTMMQGLE---FL
IYFNN-K--D-PTDDSGMPKDRFSAK-MPNASFSTLK------IQ-PSEPRDSAVYFCAS
SL-----
>V106RF-JYKQ01131102.1-trbv |(18186, 18486)|2.2245147469|(0.789,0.948,0.654)|1
--LIDAGVTQTPRHKVTEMGQEVTMRCQPIL-G------HNTVFWYRQTMMQGLE---LL
VYLRN-K--A-SLDDSGMPKDRFSAE-MPNASLATLK------IQ-PSEPRDSAVYLCAS
GL-----
>V107RF-JYKQ01131102.1-trbv |(25139, 25439)|2.48773678512|(0.985,0.989,0.735)|1
--HTEAGVTQFPSHRVIEKGQTVTLRCDPIS-G------HDYLYWYRRVMGKEIK---FL
ISFMR-V--S-TQDESGMPNKRFSAE-RTGGTYSTLK------VQ-PAELEDSGVYFCAS
SQ-----
>V109RF-JYKQ01131102.1-trbv |(35121, 35421)|2.42556840852|(0.991,0.985,0.714)|1
--SPGEEVTQTPKHLVKGEGQKAKLYCDPIK-G------HSYVFWYQQVLRKEFK---FL
ISFQN-K--N-VFDETGMPKERFSAK-CHANSPCSLE------IQ-ATKLKDSAVYFCAS
SQ-----
>V111RF-JYKQ01131104.1-trbv |(2283, 2580)|2.95654165691|(0.998,0.993,0.969)|1
--TVDGGITQSPKYVFRKEGQNVTLSCEQNL-N------HNAMYWYRQDPGQGLR---LI
YYSQI-V--N-DIQKGD-IAEGYSVS-RERKQSFPLT------VT-SAQRNPTAFYLCAS
SI-----
>V112RF-JYKQ01131104.1-trbv |(20313, 20613)|2.58281380597|(0.938,0.829,0.877)|1
--STDTKVTQRPRLLVKANGQKAKMDCVPVK-G------HSYVYWYRKKLDEELK---FL
VYFQN-E--E-IIQKAEIINERFSAQ-CPQNSPCTLE------IQ-STESGDAALYYCAS
SK-----
>V113RF-JYKQ01131105.1-trbv |(770, 1075)|2.97280001921|(0.993,0.994,0.986)|1
--SFHAEVTQTPGYLVKGKGQKTKMDCTPEK-G------HTYVYWYQQNQNKEFT---FL
ISFQD-E--Q-VLQETELHKKRFSSQ-CRKNLPCSLE------IP-SSEPGDTALYLCAS
SQST---
>V114RF-JYKQ01131107.1-trbv |(8150, 8448)|2.94572941874|(0.994,0.999,0.958)|1
--SMDADVTQTPRNKIAKTGKRIMLECSQTK-G------HDQMYWYRQDPGLGLR---LI
YYSFD-V--Q-DINKGE-ISDGYSVS-RQEQAKFSLS------LE-SATPNQTALYFCAT
SD-----
>V115RF-JYKQ01131107.1-trbv |(16640, 16937)|2.39007568096|(0.962,1.000,0.690)|1
--LMEADIYQNPRHRVIGTGKKITLECSQTM-G------HDKMYWYQQDPGMELH---LI
HYSYG-V--N-STERGD-YSSKSTVS-RLRIEHFPLT------LE-STSPSHTSQYLCAS
SE-----
>V116RF-JYKQ01131110.1-trbv |(21384, 21680)|2.4089796803|(0.968,1.000,0.698)|1
--PLEAQVTQNPRYLITVTGKKLTVTCSQNM-N------HEYMSWYRQDPGLGLR---QI
YYSSN-V--E-LVDKGD-IPEGYNVS-RKEKTTFPLI------LE-SPSPSQTSLYFCAS
SY-----
>V117RF-JYKQ01131110.1-trbv |(26751, 27058)|2.98474002125|(0.996,1.000,0.989)|1
--LVDVKVTQSSRYLIKRTGEKVFLECVQDM-D------HERMFWYRQDPGLGLR---LI
YFSYD-V--K-LNEKGD-IPEGYSVS-REKKERFSLI------LG-STSTNQTSMYLCAS
SLSTA--
>V118RF-JYKQ01131111.1-trbv |(5907, 6210)|2.9793601679|(0.988,0.992,1.000)|1
-SVFSAVISQKPSRDVCQRGTSVTFQCQVDS-Q------VTMMFWYRQRPGQSMT---LI
ATANQGS--E-ATYESGFVIDKFPIS-RPNLTFSTLT------VS-NTSPEDSSIYLCSV
E------
>V119RF-JYKQ01135385.1-trdv |(1626, 1927)|2.89217365357|(0.995,0.983,0.931)|1
-SGMAQTVTQSQPEVSVREAETVTLSCTYDTSE-----SNYYLFWYKQPPSRQMI---LI
IRQEAYK--Q-Q----NATENRFSVNFQKAAKSFSLK------IS-DSQLGDAAMYFCAF
M------
>V120RF-JYKQ01135388.1-trav |(4501, 4803)|3.0|(1.000,1.000,1.000)|1
-SGMAQTVTQSQPEMSVQEAETVTLSCTYDTSE-----SNYYLFWYKQPPSRQMI---LI
IRQEAYK--Q-Q----NATENRFSVNFQKATKSFSLK------IS-DSQLGDAAMYFCAY
RS-----
>V121RF-JYKQ01135389.1-trav |(2804, 3092)|3.0|(1.000,1.000,1.000)|1
-LSGELKVGQNPLFLSTQEGKNYTIYCNYSTAS-------DRLYWYRQDPGKSLE---SL
FVLLSNG--A-VK-----QEGRLMASLDTKARLSSLH------IT-AALQDLSATYFCAV
-------
>V123RF-JYKQ01187326.1-igkv |(1372, 1659)|2.62207451259|(0.997,0.789,0.995)|1
-----TVVTQSPATLSVSPGERATISCRTSQSV------GSRLAWYQQKPGQAPR---LL
IYG------A-SNRATG-IPDRFSGSG--SGTDFTLT------IS-SLKPEDAAVYYCQQ
DNDWK--
>V124RF-JYKQ01187337.1-igkv |(7825, 8116)|2.99499200002|(0.999,0.998,0.998)|1
-----IVLTQSPTSMAVSQGERVTISCTASSSV-----STSYLHWYQQKPGFPPR---LL
VYR------T-SNLASG-VPARFSGSG--SGTSYTLT------IS-SMEAEDAANYYCQQ
GNSIP--
>V125RF-JYKQ01245859.1-ighv |(891, 1200)|2.99899600001|(1.000,1.000,0.999)|1
-AHSQVQLVQS-GAEVKKPGASVKVSCKASGYTF--T--DYYMHWVRQAPGQGLE---WI
GWINPYN--G-NTKYAQKFQGRVTMTRDTSTSTAYME------LS-SLRSEDTAVYYCAR
-------
>V126RF-JYKQ01245874.1-ighv |(7328, 7639)|2.95279341439|(0.999,0.963,0.996)|1
-VRCEVQLVES-GGGVVQPEGSLRLSCAASGFTF--D--DYAMHWVRQAPGKGLE---WV
SGISWN--GD-STYYADSVKGRFTISRDNAKNSLFLQ------MN-RLRAEDTAVYYCAK
D------
>V127RF-JYKQ01245874.1-ighv |(37996, 38302)|2.99899200002|(0.999,1.000,1.000)|1
-VQCEEQLVES-GGGLVQPGASLRLSCAASGFTF--S--SYDMHWVRQAPGKGLE---WV
SAISIG---G-GTYYPDSVKGRFTVSRDNAKNSLYLQ------MN-SLRAEDTAVYYCAR
-------
>V128RF-JYKQ01245876.1-ighv |(15391, 15700)|2.44947918403|(0.968,0.989,0.717)|1
-VLSQLQLQES-GPGVVKPSETLSLTCAVSGGSI--S-S-YWWGWIRQPPGKGLE---WI
GSIYGSG--G-SNYLNPSLKSRVTLSVDTSKNQFSLK------LS-SVTAADTAVYYCAR
-------
>V129RF-JYKQ01245876.1-ighv |(36255, 36564)|3.0|(1.000,1.000,1.000)|1
-VQCEVQLVES-GGGLVQPGGSLRLSCAASGFTF--S--SYWMNWVRQAPGKGLE---WV
SRINS--DGS-STNYADSVKGRFTISRENAKNSLYLQ------MN-SLRAEDTAVYYCTT
-------
>V130RF-JYKQ01245880.1-ighv |(7638, 7950)|3.0|(1.000,1.000,1.000)|1
-VQCEVQLVES-GGGLVQPGGSLRLSCVASGFTF--S--DYYMHWARQAPGKGLE---WV
SRISSGS-GS-STYYPDSVKGRFTISRDNAKNTLYLQ------MN-SLRAEDTAVYYCAR
-------
>V131RF-JYKQ01245881.1-ighv |(6177, 6492)|2.99796800026|(0.998,1.000,1.000)|1
-VQCEVQLVES-GGGLVQPGGSLRLSCAASGFTF--S--DHYMDWVRQAPGKGLE---WV
GFIKNKADGG-TADYAASVKGRFTISRDDSKNTLYLQ------MN-SLKTEDTAVYYCTR
-------
>V132RF-JYKQ01245882.1-ighv |(18027, 18336)|2.64099606504|(0.988,0.937,0.826)|1
-AHAQVQLVQS-GAEVKQPGASVKVSCKASGYTF--T--SYGMNWVRQAHGQRLE---WM
GWINTNT--G-NPTYAQGFKERFTFSMDTSISTAYLQ------IS-SLKAEDTAVYYCAR
-------
>V133RF-JYKQ01245882.1-ighv |(35101, 35410)|2.75115893582|(0.960,0.915,0.899)|1
-AHSEVQLVQS-GAEVKKPGATVKISCKASGYTF--T--DYYLHWVRQAPGKGLE---WM
GRVDPED--G-EADYAQKFQDRLTMTADTSTDTAYME------LS-SLRSEDTAVYYCTR
-------
>V134RF-JYKQ01245886.1-ighv |(241, 551)|2.99293600205|(0.999,0.999,0.995)|1
-FQCEVQLVES-GGGLVQPGGSLRLSCVASGFTF--S--DHYMDWVRQAPGKGLE---WV
SSISTG-SGS-TTLYPDSVKGRFTISRDNAKNTVYLQ------MN-SLRAEDTAVYYCA-
-------
>V135RF-JYKQ01245888.1-ighv |(1665, 1980)|2.99899600001|(1.000,0.999,1.000)|1
-VQCEVQLVES-GRGLVQPGGSLRLSCAVSGFTF--S--DHYVSWVRQAPGKGLE---WV
GFMRNKANGG-RTEYAASVKGTFTISRDDSKSIASLQ------MS-SLKTEDTAVYYCAR
-------
>V136RF-JYKQ01245888.1-ighv |(18543, 18855)|3.0|(1.000,1.000,1.000)|1
-VLSQVQLQES-GPGVVKPSETLSLTCAVSGGSI--SDS-YYWSWIRQAPGKGLE---WI
GGIYGSG--S-STNYNPSLKSRVTISKDTSKNQFSLK------LS-SVTAADTAVYYCAR
-------
>V137RF-JYKQ01245889.1-ighv |(13016, 13325)|3.0|(1.000,1.000,1.000)|1
-VQCEVQLVES-GGGLAQPGGSLRLSCAASGFTF--S--SYGMSWVRQAPGKGLE---WV
SGISNT--GG-SIYYADSVKGRFTISRDNSKNTLSLQ------MN-SLRAEDTAVYYCAK
-------
>V138RF-JYKQ01245890.1-ighv |(4928, 5237)|2.99899600001|(1.000,1.000,0.999)|1
-VQCDVQLVES-GGGLVKPGGSLRLSCVASGFTF--S--SYAMHWVRQAPGKGLE---WV
SVIST--SGG-TTYYADSVKGRFTISRDNAKNSLFLQ------MN-SLRAEDTAVYYCTR
-------
>V140RF-JYKQ01245904.1-ighv |(629, 938)|2.99798400013|(1.000,1.000,0.998)|1
-VQCEVQLVES-GGGVVQPGGSLRLSCAASGFTF--D--DYAMGWVRQAPGKGLE---WV
SAISWD--GD-STGYADSVKGRFTISRDNAKNSLSLQ------MN-SLRAEDTAVYYCAR
-------
>V141RF-JYKQ01005004.1-igkv |(7879, 8179)|2.99899600001|(1.000,1.000,0.999)|-1
-TTGETVMTQSPATLSLSPGERATLSCRASQSV------GSSLAWYQQKPGQAPR---LL
VYY------A-SSRATG-IPDRFSGSG--SGTDFTLT------IS-SLDPEDVGVYYCQK
YNDWP--
>V142RF-JYKQ01005007.1-igkv |(665, 964)|2.994900005|(1.000,0.995,1.000)|-1
-TTGEIVMTQSPATLSLSPGERATLSCRASQSV------GSYLAWYQQKPGQAPR---LL
IYG------A-SSRATG-IPDRFSGSG--SGTEFTLT------IS-SLEPEDFAVYYCQQ
YNNWN--
>V143RF-JYKQ01005012.1-igkv |(8346, 8639)|2.99385601037|(1.000,1.000,0.994)|-1
-ARCDIQMTQSPSSLSASVGDRVTITCRASQGI------STYLNWYQQKPGKAPK---LL
IYA------A-SSLQSG-VPSRFSGSG--SGTVFTLT------IS-SLQSEDFATYYCLQ
YNS----
>V144RF-JYKQ01005013.1-igkv |(2914, 3214)|3.0|(1.000,1.000,1.000)|-1
-AKCDIQMTQSPSSLSASVGDRVTITCRASQGI------SSYLAWYQQKPGKAPK---PL
IYY------A-SNLESG-VPSRFSGSG--SGTDFTLT------IS-SLQPEDFATYYCQQ
YNSAP--
>V145RF-JYKQ01005014.1-igkv |(6504, 6804)|3.0|(1.000,1.000,1.000)|-1
-ARCDIQMTQSPSSLSASAGDRVTITCRASQGI------SSYLAWYQQKPGKAPK---LL
IYD------A-SNLQSG-VPSRFSGSG--SGTEFTLT------IS-SLQPEDFAVYYCQQ
RNSYP--
>V147RF-JYKQ01005018.1-igkv |(609, 897)|2.98874403277|(0.999,0.991,0.999)|-1
-----IVLTQSPGTLSLSPGERATLSCRASQSV------SSSLAWYQQKPGQVPR---LL
IYG------A-SSRATG-IPDRFSGSG--SGTEFTLT------IS-SLEPEDFAVYYCQQ
YSNWP--
>V148RF-JYKQ01005018.1-igkv |(13195, 13495)|3.0|(1.000,1.000,1.000)|-1
-ARCDIQMTQSPSSLSASVGDRVTITCRASQGI------STYLNWYQQKPGKAPK---LL
IYA------A-SRLESG-VPSRFSGSG--SGTEFTLT------IS-SLQPEDFATYYCQQ
YNSNP--
>V149RF-JYKQ01005019.1-igkv |(2049, 2337)|2.98874403277|(0.999,0.991,0.999)|-1
-----IVLTQSPGTLSLSPGERATLSCRASQSV------SSSLAWYQQKPGQVPR---LL
IYG------A-SSRATG-IPDRFSGSG--SGTEFTLT------IS-SLEPEDFAVYYCQQ
YSNWP--
>V150RF-JYKQ01005022.1-igkv |(4846, 5146)|3.0|(1.000,1.000,1.000)|-1
-ARCDIQMTQSPSSLSASAGDRVTITCRASQGI------STYLNWYQQKPGKAPK---LL
IYA------A-SSLQSG-VPSRFSGSG--SGTEFTLT------IS-SLQPEDFATYYCQQ
YNSYP--
>V151RF-JYKQ01005026.1-igkv |(2797, 3089)|3.0|(1.000,1.000,1.000)|-1
-AKCDIQMTQSPSSLSASVGDRVTITCRASQTI------SSYLAWYQQKPGKVPK---LL
IYA------A-SSLESG-VPSRFSGSG--SGTEFTLT------IS-SLQPEDFATYYCQQ
HN-----
>V152RF-JYKQ01005027.1-igkv |(25376, 25667)|2.99186400565|(1.000,0.995,0.997)|-1
----DIQMTQSPASLSASVGDRVTITCRASQSF------SSSLAWYQQKPGKAPK---LL
IYS------A-SSLQSG-VPSRFSGSK--SGTDFTLT------IS-SLQPEDIASYYCQQ
YYSTP--
>V153RF-JYKQ01005032.1-igkv |(9334, 9634)|2.99798400013|(1.000,0.998,1.000)|-1
-TTGQVILTQSPATLSLSPGERATLSCRASQSV------SSNLAWYQQKPGQAPR---LL
IYG------A-SSRATG-IPDRFSGSG--SGTEFTLT------IS-SLEPEDFAVYYCQK
YSSSP--
>V155RF-JYKQ01005033.1-igkv |(2883, 3181)|2.84701501984|(1.000,0.894,0.997)|-1
-SKGEIVLTQSPAFRSVTLKEKVTITCQASQS------IGSSLHWYQQKPDQSPK---LL
IKY------A-SQSISG-VPSRFSGSG--SGTDFTLT------IN-SLEAEDAATYYCQQ
SRSF---
>V156RF-JYKQ01005040.1-igkv |(7064, 7364)|2.53096374525|(0.986,0.995,0.750)|-1
-TRCAIQMTQSPSSLSASVGDRVTITCRASQSI------GSNLAWYQQKPGKVPK---LL
IYA------A-STLQSE-VPSRFSGSG--SGADFTLT------IS-SLQPEDVATYYCQK
CDSAP--
>V157RF-JYKQ01005045.1-igkv |(2627, 2942)|2.49419763699|(0.947,0.996,0.731)|-1
-SSGDIVMTQTPLSLPVTPGEPASISCRSSQSLLHS-DGYTYLDWYLQKPGQSPQ---LL
IHG------G-SNRASG-VPDRFSGSG--SGTDFTLK------IS-KVEAEDVGVYYCMQ
HRALP--
>V158RF-JYKQ01005048.1-igkv |(219, 521)|2.66167912623|(0.978,0.906,0.856)|-1
-SSGDVVMTQSPLSLPVTPGQPASISCRSSQSLVH-SNGNTYLSWLQQKPGQPPR---LL
IYK------V-SNRDSG-VPDRFSGSG--AGTDFTLK------IS-RVEAEDVGVYYCVQ
V------
>V159RF-JYKQ01015003.1-ighv |(1329, 1641)|2.99698000014|(0.998,0.999,1.000)|-1
-VLSQVQLQES-GPGLVKPSETLSLTCAVSGGSI--SGS-YGWNWIRQPPGKGLE---WI
GRIYGSS--G-NTYYNPSLKSRVTISRDTSKNQFSLK------LS-SVAAADTAVYYCAR
-------
>V160RF-JYKQ01015024.1-ighv |(3039, 3348)|2.44463425252|(0.880,0.750,0.880)|-1
-AHSQEQLVQS-GAEVKKPGASVKVSCKASGYIF--T--GYIISWLRQAPGQGFE---WM
GGIHPGY--G-STSYAQKFQGRVTMTGDTSTSTVYME------LS-SLRSEDTAMYYCAA
-------
>V161RF-JYKQ01015026.1-ighv |(1663, 1972)|2.96266005261|(0.990,0.981,0.992)|-1
-AHSEMQLVQS-EAEVKKPGASVKVSCKASGYTF--T--YRYLHWVRQTPGQGLE---WM
GWITPYN--G-NTNYAQKFQGRVTITRDRSMSTAYME------LS-SLRSEDTAVYYCAR
-------
>V162RF-JYKQ01026643.1-trav |(15229, 15519)|2.45167677197|(0.875,0.736,0.925)|-1
-VSSEDKVMQNPLSLVVHEGDTVTLNCSYEVAN------FRSLLWYKQEK-KAPI---FL
FTLTSSG--I-EK-----KSGRLSSILDKKDLYSILN------IT-ATQTRDSAVYLCAV
E------
>V165RF-JYKQ01026655.1-trav |(5208, 5498)|2.46253104629|(0.893,0.793,0.831)|-1
--TIIDAKTTQPTSMDCAEGRAANLPCNHSTIS-----GSEYVYWYRQIHSQEPQ---YV
IHGLKNN--E--------TNVMASLIITEDRKSSTLI------LP-HATLRDTAVYYCIV
RG-----
>V166RF-JYKQ01026663.1-trav |(902, 1202)|2.89902032645|(0.969,0.976,0.955)|-1
-SSVAQKVTQTQSSVSMPVEKAVTLNCQYETSRW-----SYYLFWYKQPPSKEMI---FL
IRQGSSE--P-N-----AKSGRYSVNFQKAASSIALT------IS-ALQLEDSATYFCAL
WE-----
>V167RF-JYKQ01026665.1-trav |(1710, 2010)|2.44251226488|(0.894,0.795,0.816)|-1
-SSVAQKVTQAQSSVSMPVGKAVTLNCQYETSWW-----SYDLFWYKQPPSKEMI---FL
IRQGYSE--Q-N-----ARNGRYSVNFQKAASSIALT------IS-ALQLEDSATYFCAL
RE-----
>V168RF-JYKQ01042840.1-ighv |(1682, 1994)|2.30365940917|(0.934,0.688,0.901)|-1
-VLSQLQLQES-GPGLVRPSETLSLICTVSGGSI--SDS-YYWNWIRQPPGKGLE---WI
GNIYGGG--G-STNYNPSLKSRVTISKDASKNQFSLK------LS-SVTAADTAVYYCAR
-------
>V169RF-JYKQ01042857.1-ighv |(1035, 1344)|2.70513028259|(0.979,0.990,0.826)|-1
-AQSQVQLVQS-GAEVKKPGASVKLSCKASGFTF--G--SYAISWVRQAPGQGLE---WM
GEIIPAF--G-IADYAQKFQGRVTITADTSTNTAYME------LS-SLRSEDTAVYYCAR
-------
>V171RF-JYKQ01042861.1-ighv |(9368, 9683)|3.0|(1.000,1.000,1.000)|-1
-VQCEVQLVES-GGGLVQPGGSLRLSCAASGFTF--S--DYYMYWVRQAPGKGLE---WV
GFIRSKAYGG-TAEYAASVKGRFTISRDDSKSIASLQ------MN-SLRAEDTAVYYCTR
-------
>V172RF-JYKQ01044654.1-igkv |(1250, 1550)|3.0|(1.000,1.000,1.000)|-1
-ARCDIQMTQSPSSLSASVGDKVTITCHASQGI------SSWLAWYQQKPGKAPK---PL
IYK------A-SSLQSG-VPSRFSGSG--SGTDFTLT------IS-SLQPEDFATYYCQQ
NSSSP--
>V174RF-JYKQ01044662.1-igkv |(2570, 2870)|3.0|(1.000,1.000,1.000)|-1
-AKCDIQMTQSPPSLSASVGDRVTITCRASQGI------SNWLAWYQQKPGEAPK---LL
IYA------A-STLQSG-VPSRFSGSG--SGTEFTLT------IS-SLQPEDFATYYCQQ
HNSYP--
>V175RF-JYKQ01052437.1-igkv |(14196, 14511)|2.27308347854|(0.953,0.684,0.899)|-1
-SSGDVVMTQSPLSLPVTPGQPASISCRSSQSLVH-SNGNTYLNWFQQKPGQPPR---LL
IYK------V-SNRYSG-VPDRFSGSG--AGTDFTLK------IS-RVEAEDVGIYYCMQ
SIHLP--
>V176RF-JYKQ01052439.1-igkv |(123, 425)|2.97851211712|(0.997,0.996,0.986)|-1
-SSGDVVMTQSPLSLSVTIGQPASISCRSSQSLVH-SDGKTYLNWLQQKPGQPPR---RL
IYQ------V-SNRDSG-VPDRFSGSG--AGTDFTLK------IS-RVETEDVGVYYCVQ
G------
>V177RF-JYKQ01052440.1-igkv |(29428, 29728)|2.99389600501|(1.000,0.999,0.995)|-1
-ARCDIQLTQSPSSLSASVGDRVTITCQASQGI------SNNLAWYQQKPGKVPK---LL
IYA------A-STLQSG-VPSRFSGSG--SGTDFTLT------IS-SLQPEDFATYYCQH
GYGTP--
>V178RF-JYKQ01052440.1-igkv |(44786, 45101)|2.30850217163|(0.975,0.672,0.969)|-1
-SSGDIVMTQTPFSLPVTPGEPASISCRSSQSLL-HSDGRTYLYWYLQKPGQPPR---LL
IYR------V-SNRFSG-VPDRFSGSG--SGTDFTLK------IS-RVEAEDVGVYYCMQ
ALQNP--
>V179RF-JYKQ01052440.1-igkv |(49779, 50094)|2.69070373172|(0.953,0.881,0.892)|-1
-SSGDIVMTQTPLSLPVTPGEPASISCRSSQSLLHS-NGNTYLHWYLQKPGQSPQ---LL
FYG------G-SNRASG-VPDRFSGSG--SGTDFTLK------IS-KVEAEDVGVYYCVQ
AIAFP--
>V180RF-JYKQ01052440.1-igkv |(68584, 68899)|2.54157958563|(0.989,0.760,0.982)|-1
-SSGDIVMTQTPLSLPVTAGEPASISCRSSQSLL-HSNGNTYLYWYLQKPGQPPW---LL
IYR------V-SNRFSG-VPDRFSGSG--SGTDFTLK------IS-RVEAEDVGVYYCMQ
ALQTP--
>V181RF-JYKQ01052440.1-igkv |(90005, 90305)|3.0|(1.000,1.000,1.000)|-1
-ARCDIQMTQSPSSLSASVGDRVTITCRASQGI------SNYLNWYQQKPGKAPK---LL
IYR------A-SNLETG-VPSRFSGSG--SGTDFTLT------IS-SLQPEDIATYYCQK
HDNSP--
>V183RF-JYKQ01052440.1-igkv |(120035, 120335)|2.99598400013|(0.998,0.998,1.000)|-1
-ARCDIQMTQSPSSLSASIGDRVTITCRASQNI------YSNLAWYQQKPGKAPK---PL
IYY------A-SSVETG-VPSRFSGSG--SGTDYTLT------IS-SLQPEDVATYYCQQ
YDNSP--
>V184RF-JYKQ01052441.1-igkv |(8581, 8881)|2.99899600001|(1.000,0.999,1.000)|-1
-ARCDILMTQSPASLSASVGDRVTITCRASQGI------SNYLAWYQQKPGETPK---LL
IYA------A-SSLQSG-IPSRFSGSG--SGTDFTLT------IS-SLQPEDFATYYCQH
YYSTP--
>V185RF-JYKQ01052442.1-igkv |(12441, 12756)|2.62625363152|(0.977,0.819,0.933)|-1
-TSGDIVMTQTPLSLPVTPGEPASISCRSSQSLL-HSGGKTYLYWYLQKPGQSPQ---LL
IQE------V-SNRASG-VPDRFSGSG--SGTDFTLK------IS-RVEAEDVGVYYCMQ
GIQLP--
>V186RF-JYKQ01052443.1-igkv |(11550, 11850)|2.99899600001|(1.000,0.999,1.000)|-1
-ARCDIQMTQSPSSLSASVGDRVTITCQASQSL------SNYLNWYQQKPGKIPK---LL
IYG------A-SSLQSG-IPSRFSGSG--SGTDYTLT------IS-SLQPEDFATYYCQQ
GYSNP--
>V187RF-JYKQ01052443.1-igkv |(27506, 27821)|2.77459093887|(0.997,0.858,0.994)|-1
-TSGDIVMTQTPLSLPVTLGEPASISCRSSQSLL-HSDGYTYLDWYVQKPGQSPQ---LL
IYL------V-SNRASG-VPDRFSGSG--SGTDFTLK------IS-RVEAEDVGVYYCMQ
GTQLP--
>V188RF-JYKQ01052444.1-igkv |(11183, 11498)|2.54667557143|(0.990,0.761,0.985)|-1
-YSGDIVMTQTPLSLPVIPGEPASISCRSSQSLLDS-DGYTCLDWYLQKPGQSPQ---LL
IYE------V-SNRASG-VPDRFSGSG--SGTDFTLK------IS-RVEAEDVGVYYCMQ
SIEFP--
>V190RF-JYKQ01052444.1-igkv |(27757, 28057)|2.99599600001|(0.999,0.998,0.999)|-1
-ARCDIQMTQSPSSLSASVGDRVTITCRASQGI------NKELAWYQQKPGKAPM---LL
LYS------G-SSLHTG-VPSQFSGSG--SGTDFTLT------IS-SLQPEDVATYYCRQ
DYTTP--
>V191RF-JYKQ01052444.1-igkv |(35903, 36218)|2.77116921837|(0.998,0.860,0.987)|-1
-SSGDIVMTQTPLSLPVTPGQPASISCRSSQSLL-HSDGYTYLHWYLQKPGQSPR---LL
IYL------V-SNRASG-VPDRFSGSG--SGTDFTLK------IS-RVETEDVGVYYCMQ
TLQTP--
>V192RF-JYKQ01052444.1-igkv |(45830, 46130)|2.99385601037|(1.000,0.994,1.000)|-1
-ARCDIQMTQSPSSLSASVGDRVTITCRASQGI------GNYLAWYQQKPGETPK---LL
IYA------A-SSLQSG-IPSRFSGSG--SGTDYTLT------IS-SLQPEDFATYYCQQ
GYSNP--
>V193RF-JYKQ01052444.1-igkv |(60842, 61157)|2.72998046744|(0.988,0.864,0.945)|-1
-TNGDIVMTQTPLSLPVTPGEPASISCRSSQSLLHS-DGKTYLHWYLQKPGQSPQ---LL
IYL------V-SNRASG-VPDRFSGSG--SGTDFTLK------IS-RVEVEDVGVYYCEQ
GTQLP--
>V194RF-JYKQ01052450.1-igkv |(9881, 10181)|2.99593600205|(1.000,0.996,1.000)|-1
-ARCDIQMTQSPSSLSASVGDRVTITCRASQSI------NKELDWYQQKPGKAPT---LL
IYA------A-SSLQTG-VSSRFSGSG--SGTDFTLT------IS-SLQPEDVATYYCQQ
DYTTP--
>V195RF-JYKQ01052451.1-igkv |(138372, 138687)|2.62181211064|(1.000,0.793,0.987)|-1
-SRGDIVMTQTPLSLPVTPGEPASISCRSSQSLLHS-NGYTYLHWYLQKPGQSPQ---LL
IYL------G-SNRASG-VPDRFSGSG--SGTDFTLK------IS-RVEAEDVGVYYCEQ
TLQTP--
>V196RF-JYKQ01056010.1-ighv |(10615, 10921)|3.0|(1.000,1.000,1.000)|-1
-VQCEVQLVES-GGGLVQPGGSLRLSCAASGFTF--S--SYAMQWVHQAPGKGLE---WV
SAIGP--GG--DTYYADAVKGRFTISRDNAKNSLYLQ------MN-SLRAEDTAVYYCAR
-------
>V197RF-JYKQ01056018.1-ighv |(1836, 2148)|2.63084854301|(0.859,0.868,0.918)|-1
-VLSQVKLQQW-GEGLVKPSETLSLTCAIYGGSI--S-GYYYWSWIRQPPGKGLE---WI
GNIYGGG--G-STNYNPSLKNRVTISKDTSKNQFSLK------LS-SVTAADTAVYYCAR
-------
>V198RF-JYKQ01062878.1-ighv |(882, 1191)|3.0|(1.000,1.000,1.000)|-1
-VQCEVQLVES-GGGLVKPGASLRLSCAASGFTF--S--SYGMHWVRQAPGKGLE---WV
SYISSDS--S-YIYYADSVKGRFTISRDNAKNSLSLQ------MN-SLKTEDTAVYYCAR
-------
>V199RF-JYKQ01062881.1-ighv |(1585, 1894)|2.991900005|(0.999,0.999,0.994)|-1
-AHSQVQLVQS-GAEVKKPGSSVKVSCKASGYTF--T--DYYMQWVRQAPGQGLE---WM
RWINPYN--G-NTKYAQKFQGRVTMTRDTSTSTAYME------LS-SLRSEDTAVYYCAT
-------
>V200RF-JYKQ01062881.1-ighv |(4488, 4803)|2.97463883425|(0.979,1.000,0.999)|-1
-VQCEVQLVES-GGGLVQPGGSLRLSCAASGFTF--S--NHCMSWVRQAPGKGLE---WV
GFIRNKAKGG-TAEYAASVKGRFTISRDDSKSIAILQ------MN-SLKTEDTAMYYCTR
-------
>V204RF-JYKQ01066669.1-trav |(750, 1050)|2.44251226488|(0.894,0.795,0.816)|-1
-SSVAQKVTQAQSSVSMPVGKAVTLNCQYETSWW-----SYDLFWYKQPPSKEMI---FL
IRQGYSE--Q-N-----ARNGRYSVNFQKAASSIALT------IS-ALQLEDSATYFCAL
RE-----
>V206RF-JYKQ01075085.1-igkv |(254, 554)|2.99798400013|(1.000,0.998,1.000)|-1
-ARCDIQMSQSPPSLSASVGDRVTITCQACQGI------SNYLAWYQQKPGKAPK---LL
IYA------A-STLQSG-VPSRFSGSG--SGTEFTLT------IS-SLQPEDFATYYCQQ
RNSYP--
>V207RF-JYKQ01076935.1-igkv |(39827, 40127)|3.0|(1.000,1.000,1.000)|-1
-ARCDIQMTQSPSSLSASVGDTVTITCQASQGI------SDYLAWYQQKPGKAPK---LL
IYA------A-SNLESG-VPSRFSGSG--SGTEFTLT------IS-SLQPEDFATYYCQQ
YDSDP--
>V208RF-JYKQ01076937.1-igkv |(20686, 20986)|2.9898400105|(0.994,0.996,1.000)|-1
-ARCDIQMSQSPSSLSASVGDRVTITCRASQGI------SNALAWFQQKPGKAPK---LL
IYA------A-SSLQSG-VPSRFSGSG--SGTDYTLT------IS-SLQPEDFATYYCQQ
GYSTP--
>V209RF-JYKQ01076937.1-igkv |(32283, 32583)|3.0|(1.000,1.000,1.000)|-1
-ARCDIQMTQSPSSLSASVGDRVTITCRASQGI------SSYLNWYQQKPGKAPK---LL
IYY------A-TSLESG-VPSRFSGSG--SGTEFILT------IS-SLQPEDFATYYCQQ
HNSYP--
>V210RF-JYKQ01076937.1-igkv |(51727, 52015)|2.96464165191|(0.999,0.970,0.999)|-1
-----IVMTQSPATLSLSLGETATISCRTSQSV------GRKLAWYQQKPGQAPR---LL
IYG------A-SSRATG-IPDRFSGSG--SGTDFTLT------IS-SLEPEDFAVYYCQE
TSNLS--
>V211RF-JYKQ01080923.1-iglv |(36388, 36700)|3.0|(1.000,1.000,1.000)|-1
-SWAEVVFTQP-HSVSGSPGQTVTISCTRSSGSI---DS-KYVQWYQQRPGSAPT---TV
IYE------D-NKRPSG-VPDRFSGSIDSSSNSASLT------IS-GLKSEDEADYYCQS
ADGSYT-
>V212RF-JYKQ01081225.1-igkv |(3273, 3573)|2.99899200002|(0.999,1.000,1.000)|-1
-ARCDIQMTQSPSSLSASVGDKVTITCQASQSI------SSWLTWYQQKPGKAPK---LL
IYK------A-STLQSG-VPSRFSGSG--SGTEFTLT------IS-SLQPEDFATYYCQQ
FSSAP--
>V215RF-JYKQ01126545.1-iglv |(13640, 13950)|2.99698000014|(0.998,0.999,1.000)|-1
-SWAQAALTQP-PSVSGSPGQSVTISCTGTSSDI---GGYNYVSWYQQHPGKAPK---LM
IYD------V-SKRPSG-VSDRFSGSK--SGNTASLT------IS-GLQAEDEADYYCSS
YASSST-
>V216RF-JYKQ01126545.1-iglv |(37360, 37652)|2.98097252412|(0.999,0.983,1.000)|-1
----SYELTQP-PSVSVSPGQTARITCSGDA--L---PE-KYAYWYQQKPGQSPV---LI
IYE------D-SKRPSG-IPERFSGSS--SGTVATLT------IS-GAQVEDEADYYCYS
ADSSGN-
>V218RF-JYKQ01126545.1-iglv |(48188, 48491)|3.0|(1.000,1.000,1.000)|-1
-SWAQAALTQP-HSVSGSPGQSVTISCTGTSSDI---GGYDRVSWYQQHPGKAPK---LM
IYE------V-SKRPSG-VSDRFSGSK--SGNTASLT------IS-GLQAEDEADYYCSS
YAGS---
>V219RF-JYKQ01126545.1-iglv |(71572, 71866)|2.97974002125|(0.997,0.993,0.990)|-1
----QSALIQS-PSVSGSLGQSVTISCTGTSSDI---GRYNYVSWYQQQPGTTTK---LM
MYN------V-NTRPSG-VSDRFSGSK--SGNTASLT------IS-GLQAEDEADYYCSS
YEAS---
>V220RF-JYKQ01126546.1-iglv |(14999, 15296)|2.74248618871|(0.972,0.860,0.960)|-1
-SVASYELTQP-PSVSVSPGQTAKITCSGDV--L---AK-YYAHWFQQKPGQAPV---LV
IYK------D-SERPSG-IPERFSSSS--SGTTVTLT------IS-GAQAEDEADYYCYS
GDDNN--
>V221RF-JYKQ01126546.1-iglv |(24524, 24827)|2.99593600205|(1.000,0.996,1.000)|-1
-SWAQSALTQP-PSVSGSPGQSVTISCTGTSSDV---GGYSYVSWYQQHPGKAPK---LM
IYG------V-SNRPSG-VSDRFSGSK--SGNTASLT------IS-GLQAEDEADYYCCS
YTTS---
>V222RF-JYKQ01126546.1-iglv |(36976, 37279)|2.96335913276|(0.999,0.974,0.993)|-1
-SAASYDLTQP-PSVSVSPGQTARITCGGDN--I---ES-EAVHWYQQKPPQAPV---LV
IYA------D-SERPSG-IPERFSGSK--SGNTATLT------IS-GVEAGDEADYYCQM
WDSSSKH
>V224RF-JYKQ01126546.1-iglv |(60437, 60740)|2.99067605248|(1.000,0.991,1.000)|-1
-SAASYDVTQP-RSVSVSPGQTARITCGGDN--I---GS-KYVQWYQQKPAQAPV---LV
IYD------N-SDRPSG-IPERFSGSN--SGNTATLT------IS-GVEAGDEADYYCQV
WDSSSDH
>V225RF-JYKQ01126546.1-iglv |(71769, 72072)|2.98758408012|(1.000,0.998,0.990)|-1
-SWAQAALTQP-PSVSGSPGQSVTISCTGTSNDV---GGYNYVSWYQQHPGKALK---LM
IYE------V-SKRPTG-VSDRFSGSK--SGNTASLT------IS-GLQAEDEADYYCGS
YSGS---
>V227RF-JYKQ01126546.1-iglv |(89596, 89899)|2.70351211177|(0.998,0.852,0.946)|-1
-SAASYDVTQP-RSVSVSPGQTARITCGGDS--I---GS-KVVNWYQQKPAQAPV---LV
IYA------D-SVRPSG-IPERFSGSN--SGNTATLT------IS-GIEAGDEADYYCQV
WDSSSDH
>V228RF-JYKQ01126546.1-iglv |(116413, 116723)|2.99298000014|(0.998,0.999,0.996)|-1
-SWAQSALTQP-PSVSGSPGQSVTISCTGTSSDV---GGYNYVSWYQQHPGKAPK---LM
IYE------V-SKRPSG-VSDRFSGSK--SGNTASLT------IS-GLQAEDEADYYCSS
YRSSNT-
>V229RF-JYKQ01126579.1-iglv |(22005, 22315)|2.40930015418|(0.992,0.952,0.723)|-1
-SLSQPVLTQP-ASLSASPGASASLTCTFSGGIN---VAGYYIHWYQQKPGSPPR---YL
LRYKSDS--D-KHQGSG-VPSRFSGSKDASANTGILR------IS-GLQSEDEADYYCAI
-------
>V230RF-JYKQ01126579.1-iglv |(26551, 26860)|2.56589057532|(0.948,0.823,0.876)|-1
-SWAQSVLTQP-RSASEAARKSVTISCSGSSSNI---G-SNYVSWYQQLPETAPK---LL
IYY------D-DLRASG-VSDRFSGSK--SGTSASLA------IS-GLQTEDEADYYCAA
WDDSLSG
>V232RF-JYKQ01126580.1-iglv |(2043, 2350)|2.99174403277|(1.000,1.000,0.992)|-1
-SWAQSVLTQP-PSVSGDPGQRVTISCTGSSSNI---G-GYDVYWYQQVPGTAPK---LL
IYD------N-NKRPSG-VSDRFSGSK--SGTSASLT------IT-GLQTEDEADYYCQS
YDSSLS-
>V233RF-JYKQ01126580.1-iglv |(7851, 8158)|2.98527613247|(0.989,0.999,0.998)|-1
-SWAQSVLTQP-PSVSGAPGQKVTISCTGSSSNI---G-GYNVYWYQLLPGTAPK---LL
IYD------N-NKRPSG-ISDRFSGSK--SGTSASLA------IT-GLQSEDEADYYCQS
YDSSLS-
>V234RF-JYKQ01126581.1-iglv |(5729, 6039)|2.99067605248|(1.000,1.000,0.991)|-1
-SLSQPVLTQP-ASLSASPGASARLTCTLSSGIN---VGSYSIYWYQQKPGSPPR---YL
LYYYSDS--D-KHQGSG-VPSRFSGSKDASANAGLLL------IS-GLQSEDEADYYCAI
-------
>V235RF-JYKQ01126581.1-iglv |(16324, 16633)|2.69997627355|(0.991,0.822,0.995)|-1
-SWAQSVLTQP-PSVSAAPGQRVTISCSGSSSNI---GRG-YVSWYQQLPGTAPK---LL
IYD------N-NKRPSG-ISDRFSGSK--SGNSASLT------IT-GLQTGDEADYYCGA
WDSSLSA
>V236RF-JYKQ01126581.1-iglv |(20501, 20808)|2.99899600001|(1.000,1.000,0.999)|-1
-SWAQSVLTQP-PSVSGAPGQRVTISCTGSSSNI---G-GYYVQWYQQLPGTAPK---LL
IYG------N-NKRPSG-VSDRFSGSQ--SGTSASLA------IT-GLQSEDEADYYCEA
WDNSLS-
>V237RF-JYKQ01126585.1-iglv |(7447, 7757)|2.91697650973|(0.999,0.940,0.992)|-1
-SLSQPVLTQP-ASLSASPGASVRLTCTLRSGIS---VGGYNIHWYQQKPGSPPR---YL
LYYYSDS--N-KGQGSG-VPSRFSGSKDASANAGILL------IS-GFQSEDEADYYCTT
-------
>V238RF-JYKQ01126585.1-iglv |(12290, 12599)|2.99798400013|(1.000,1.000,0.998)|-1
-SWAQSVLTQP-PSASGAPGQRVTISCSGSSSNI---G-SNYVSWYQQLSGKAPK---LL
IYK------N-NQRPSG-VPDRFSGSK--SGNSASLA------IS-GLQSEDEADYYCAA
WDDSLSG
>V239RF-JYKQ01126586.1-iglv |(1288, 1598)|2.42204194905|(0.990,0.860,0.788)|-1
-SLSQPMLTQP-ASLSASPGASASLTCTFSGGIN---VAGYYIHWYQQKPGSPPR---YL
LRYKSDS--D-KHQGSG-VPSRFSGSKDASANTGILR------IS-GLQSEDEADYYCAI
-------
>V240RF-JYKQ01126586.1-iglv |(6152, 6459)|2.67372403653|(0.857,0.984,0.904)|-1
-SWAQSVLTQP-PSASGAPGQSVTISCSGSSSNI---R-GNGVHWYQQLSGTAPK---LL
IYN------N-NQRPSG-VPDRFSGSK--SGTSASLT------IT-GLRSEDEAHYYCEA
WDNSLS-
>V241RF-JYKQ01126589.1-iglv |(2854, 3164)|2.9918400105|(1.000,0.994,0.998)|-1
-SWAQSVLTQP-PSVSGAPGQRVTISCTGSSSNI---GAGYYVQWYQQLPGTAPK---LL
IYE------N-NKRPSG-VTDRFSGSK--SGTSASLT------IT-GLQSEDEADYYCQS
YDSSLS-
>V242RF-JYKQ01126589.1-iglv |(33453, 33763)|2.82485531199|(0.996,0.896,0.974)|-1
-SLSQPVLTQP-TSLSASPGASARLTCTLRSGIS---VGSYRIYWYQQKPGSPRR---YL
LNYYSDS--D-KHQGSG-VPSRFSGSKDASANAGILL------IS-GLQPEDEADYYCMI
-------
>V243RF-JYKQ01126589.1-iglv |(38258, 38567)|2.99798400013|(1.000,0.998,1.000)|-1
-SWAQSVLTQP-PSASGAPGQRVTISCSGSSSNI---G-SNYVYWYQQFPGTAPK---LL
IYY------S-NQRPSG-VPDRFSGSK--SGTSASLA------IT-GLQSEDEADYYCAA
WDNSLSG
>V245RF-JYKQ01187338.1-igkv |(11159, 11459)|2.5453184453|(0.815,0.999,0.870)|-1
-TTGQVILTQSPATLSLSPGERATLSCRASQSV------SSYLAWYQQKPGQAPR---LL
IHS------V-SSRATG-IPDRFSGSG--SGTEFTLT------IS-SLEPEDVGVYHCYQ
HSSGY--
>V246RF-JYKQ01187347.1-igkv |(14093, 14411)|2.99083600705|(1.000,0.996,0.995)|-1
-ACGDIVMTQSPDSLAVSLGERVTINCKSSQSLLYSSNNKNYLAWYQQKPGQAPK---LL
ISW------A-STRESG-VPNRFSGSG--SGTDFTLT------IS-GLQAEDVAVYYCQQ
HYSSP--
>V247RF-JYKQ01237599.1-ighv |(479, 788)|2.99899200002|(0.999,1.000,1.000)|-1
-VQGEVQLVES-GGGLSKPGGSLRLSCAASGFTF--S--DYNMHWVRQASGKGLE---WV
SGISND--GG-STWYADSVKGRFTISRENAKNTLYLQ------MN-SLRAEDTAVYYCAG
-------
>V0RF-AACZ03015560.1-igkv |(51593, 51911)|2.55368388254|(0.969,0.759,0.989)|1
-AYGDIVMTQSPDSLAVSLGGRATINCKSSQSILYSSNNKNYLAWYQQKPGQPPK---LL
IYW------A-STRQSG-VPDRFSGSG--SGTDFTLT------IS-SLQAEDVAVYYCQQ
HYSAP--
>V1RF-AACZ03015560.1-igkv |(63266, 63554)|2.27758121945|(0.852,0.681,0.855)|1
-----TTLTQSPAFVSATPGDKVTISCKASQD------IDDDMNWYQQKPGEAAI---FI
IQE------A-TTLVSG-IPPRFSGSG--YGTDFTLT------IN-NIESEDAAYYFCLQ
DDNFP--
>V2RF-AACZ03050973.1-trgv |(700, 1013)|2.87556288124|(1.000,0.985,0.918)|1
-SQKSSNLEGRMKSVTRPTGSSAEITCDLIVIN------AVYIHWYLHQEGKSPQ---RL
LYYDVSN--SRDVLESGLSLGKYYTHT-PRRWSWILR------LQ-NLIENDSGVYYCAT
WD-----
>V4RF-AACZ03053974.1-trbv |(14398, 14698)|2.97820030738|(0.997,0.999,0.983)|1
--LTEPEVTQTPSHQVTQMGQEVILRCVPIS-N------HLYFYWYRQILGQKVE---FL
VSFYN-N--K-ISEKSEIFDDQFSVE-RPDGSNFTLK------IR-STKLEDSAMYFCAS
SE-----
>V5RF-AACZ03053974.1-trbv |(26630, 26943)|2.32497548775|(0.892,0.999,0.665)|1
--PIDTEVTQTPKHLVMGMTNKKSLKCEQHM-G------HRAMYWYKQKAKKPPE---LM
FVYSY-K--K-LSIN-ESVPSRFSPE-CPNSSLLNLH------LH-ALQPEDLALYLCAS
SQDTALQ
>V6RF-AACZ03053974.1-trbv |(34490, 34786)|2.99294800078|(0.998,0.995,1.000)|1
--PVEAGVTQTPRYLIKARGQQVTLSCSPIS-G------HRSVSWYQQTPGQGLQ---FL
FEYFS-E--T-QRNKGN-FPGRFSGR-QFSNSRSEMN------VS-TLELGDSALYLCAS
SL-----
>V7RF-AACZ03053974.1-trbv |(41734, 42031)|2.99899600001|(1.000,1.000,0.999)|1
--PVNAGVTQTPKFQVLKTGQSMTLQCAQDM-N------HNSMYWYRQDPGMGLR---LI
YYSVG-E--G-TTDKGE-VPDGYNVS-RLNKREFSLR------LE-SAAPSQTSVYFCAS
SE-----
>V8RF-AACZ03053975.1-trbv |(1894, 2207)|2.93008808336|(1.000,1.000,0.943)|1
--PMEMGVTQTPRHLVMGMTNKKSLKCEQHL-G------HNAMYWYKQSAKKPLE---LM
FVYNF-K--E-QTEN-NSVPSRFSPE-CPNSSHLFLH------LH-ALQPEDSALYLCAS
SQDTALQ
>V9RF-AACZ03053976.1-trbv |(3094, 3391)|2.99070402421|(0.993,0.998,1.000)|1
--PVNAGVTQSPKFRVLKTGQSMTLQCAQDM-N------HNYMYWYQQDPGMGLR---LI
HYSAG-E--G-TTAKGE-VPDGYNVS-RLNTQNFLLR------LE-SAAPSQTSVYFCAT
SE-----
>V10RF-AACZ03053977.1-trbv |(2980, 3277)|3.0|(1.000,1.000,1.000)|1
--PLDTAVSQTPKYLVTQMGKKESLKCEQNL-G------HNAMYWYKQDSKKFLK---TM
FIYSN-K--E-PILN-ETVPNRFSPD-SPDKAHLNLH------IN-SLELGDSAVYFCAS
SQ-----
>V11RF-AACZ03053977.1-trbv |(6432, 6729)|2.99799200002|(1.000,0.999,0.999)|1
--PMEMGVTQTPRHLVMGMTNKKSLKCEQHL-G------HNAMYWYKQSAKKPLE---LM
FVYSL-E--E-RVEN-NSVPSRFSPE-CPNSSHLFLH------LH-TLQPEDSALYLCAS
SQ-----
>V12RF-AACZ03053977.1-trbv |(14911, 15208)|2.99696400065|(1.000,1.000,0.997)|1
--PVNAGVTQTPKFRVLKTGQSMSLLCAQDM-N------HEYMYWYRQDPGMGLR---LI
HYSVG-E--G-TTAEGE-VPDGYNVS-RLKKQNFLLG------LE-SAAPSQTSVYFCAS
SY-----
>V13RF-AACZ03053979.1-trbv |(398, 698)|2.99174403277|(1.000,1.000,0.992)|1
--HTGAGVSQSPSNKVTEKGKDVELRCDPIS-G------HTALYWYRQSLGQGLE---FL
IYFQG-N--S-APDKSGLPSDRFSAE-RTGGSVSTLT------IQ-RTQQEDSAVYLCAS
SL-----
>V14RF-AACZ03053981.1-trbv |(4476, 4773)|2.99699200002|(0.999,0.998,1.000)|1
--PVIAGITQAPTSQILAAGRSMTLRCTQDM-R------HNAMYWYRQDLGLGLR---LI
HYSNT-A--G-TTGKGE-VPDGYSVS-RANTDDFPLT------LA-SAVPSQTSVYFCAS
SD-----
>V15RF-AACZ03053981.1-trbv |(8075, 8375)|2.994900005|(1.000,1.000,0.995)|1
--HTGAGVSQTPSNKVTEKGKDVELRCDPIS-G------HAALYWYRQSLGQGPE---FL
IYFQG-T--G-AADDSGLPNDRFFAV-RPEGSVSTLK------IQ-RTEQGDSAVYLCAS
SL-----
>V16RF-AACZ03053981.1-trbv |(12907, 13203)|2.34946538755|(0.911,0.749,0.821)|1
--PVEAGVTQSPTHLIKTRGQQVTLRCSPIS-G------HSSVSWYQQALGQGHQ---FI
SRYAN-E--L-RRSEGN-FPNRFSGR-QFHDYCSEMN------VS-ALELGDSALYLCAR
SL-----
>V17RF-AACZ03053981.1-trbv |(15649, 15945)|2.98967205249|(1.000,0.991,0.999)|1
--PVDSGVTQTPKHLITATGQQVTLRCSPRS-G------DLSVYWYQQSLDQGLQ---FL
IQYYN-G--E-ESAKGN-ILERFSAQ-QFPDLHSELN------LS-SLELGDSALYFCAS
SV-----
>V19RF-AACZ03053981.1-trbv |(31375, 31675)|2.97720030738|(0.998,0.996,0.984)|1
--LSEAEVAQSPRYKITEKSQAVAFWCDPIS-G------HATLYWYRQILGQGPE---LL
VQFQD-E--S-VVDDSQLPKDRFSAE-RLKGVDSILK------IQ-PAELGDSAMYLCAS
SL-----
>V21RF-AACZ03053983.1-trbv |(4545, 4845)|2.9307634587|(0.992,0.982,0.961)|1
--LTEAGVAQSPRYKIIEKRQSVAFWCNPIS-G------HATLYWYQQILGQGPK---LL
IQFQN-N--G-VVDDSQLPKDRFSAE-RLKGVDSTLK------IQ-PAKLEDSAMYLCAS
SL-----
>V22RF-AACZ03053983.1-trbv |(21546, 21843)|2.97840127932|(1.000,1.000,0.980)|1
--PVNAGVTQTPKFQVLKTGQSMTLQCAQDM-N------HKYMYWYRQDPGMGLR---LI
HYSVG-A--G-ITDKGE-VPNGYNVS-RSNTEDFPLS------LV-SAAPSQTSVYFCAS
SY-----
>V23RF-AACZ03053983.1-trbv |(25762, 26062)|2.99899600001|(1.000,0.999,1.000)|1
--HTGAGVSQSPRYKVAKRGRDVALRCDSIS-G------HVTLYWYRQTLGQGSE---VL
TYFRS-D--A-QRDKSGRPSGRFSAE-RPERSVSTLK------IQ-RTEQGDSAVYLCAS
SL-----
>V24RF-AACZ03053983.1-trbv |(33686, 33982)|2.99899600001|(1.000,1.000,0.999)|1
--PVDAGVTQSPTHLIKTRGQQVTLRCSPQS-G------HNTVSWYQQALGQGPQ---FI
FQYYR-E--E-ENGRGN-FSPRFSGR-QFPNYSSELN------VN-ALELDDSALYLCAS
SL-----
>V25RF-AACZ03053983.1-trbv |(40132, 40429)|2.98483600705|(0.998,0.993,0.994)|1
--PVNAGVTQTPKFRILKIGQSMTLQCAQDM-N------HNYMYWYRQDPGMGLK---LI
YYSVG-A--G-ITDKGE-VPNGYNVS-RSTTEDFPLR------LE-SAAPSLTSVYFCAS
SY-----
>V26RF-AACZ03053984.1-trbv |(12230, 12526)|2.98980401921|(0.999,0.999,0.992)|1
--PVDAGVTQSPTHLIKTRGQQVTLRCSPIS-G------HTSVSWYQQALGQGPQ---FI
FQYYE-K--E-ERGRGN-FPDRFSAC-QFPNYSSELN------VN-ALLLGDSALYLCAS
SL-----
>V27RF-AACZ03053986.1-trbv |(8, 308)|2.99899200002|(0.999,1.000,1.000)|1
--HTGAGVSQSPRYKVTKRGQDVTLRCDPIS-G------HVALYWYRQALGQGPE---FL
TYFNY-E--A-QPDKSGLPNDRFSAE-RPEGSNSTLT------IQ-RTEQRDSAMYLCAS
SL-----
>V28RF-AACZ03053987.1-trbv |(5059, 5356)|2.89911529989|(0.997,0.965,0.950)|1
--PMNAGVTQTPKFHILKTGQSMTLQCAQDM-N------HGYMSWYRQDPGMGLR---LI
YYSAA-A--G-TTDKGE-VPNGYNVS-RLNTEDFPLR------LV-SAAPSQTSVYFCAS
SY-----
>V29RF-AACZ03053988.1-trbv |(2703, 3003)|2.99088400513|(0.998,1.000,0.993)|1
--HTGAGVSQSPRYKVTKRGQDVTLRCDPIS-S------HATLYWYQQALGQGPE---FL
TYFNY-E--A-QPDKSGLPNDRFSAE-RPEGSNSTQT------IQ-RTEQRDSAMYLCAS
SL-----
>V30RF-AACZ03053988.1-trbv |(11127, 11423)|2.99798400013|(1.000,0.998,1.000)|1
--PVDAGVTQSPTHLIKTRGQHVTLRCSPIS-G------HTSVSWYQQALGQGPQ---FI
FEYYE-K--E-ERGRGN-FPDRFSAR-QFPNYSSELN------VN-ALLLGDSALYLCAS
SL-----
>V31RF-AACZ03053988.1-trbv |(18445, 18742)|2.9958720041|(0.996,1.000,1.000)|1
--PVNAVVTQTPKFQVLKTGQSMTLQCAQDM-N------HDCMSWYRQDPGMGLR---RI
HYSVA-A--G-ITDKGE-VPDGYNVS-RSNKEDLPLR------LE-SAAPSQTSVYFCAS
SY-----
>V32RF-AACZ03053988.1-trbv |(23071, 23371)|2.99599200002|(0.998,0.999,0.999)|1
--HTGAGVSQSPRYKVTKRGQDVALRCDPIS-G------HVSLFWYQQALGQGPE---FL
TYFRN-E--A-QLDKSGLPSDRFFAE-RPEGSVSTLK------IQ-RTQQEDSAVYLCAS
SL-----
>V33RF-AACZ03053988.1-trbv |(31286, 31582)|2.99298000014|(0.998,0.996,0.999)|1
--PVEAGVTQSPTHLIKTRGQQVTLRCSPIS-G------HTSVYWYQQALGLGLQ---FL
LWYDE-G--E-ERNRGN-FPRRFSGR-QFPNYSSELN------VN-ALELEDSALYLCAS
SL-----
>V34RF-AACZ03053988.1-trbv |(40506, 40806)|2.97120155558|(0.997,0.976,1.000)|1
--HADTGVSQDPSHKITKRGQNVTFRCDPIS-E------HNRLYWYRQTLGQCPE---FL
TYFQN-E--A-QLEKSRLLSDRFSAE-RPKGSFSTLE------IQ-HTEQGDSAIYLCAS
SL-----
>V35RF-AACZ03053988.1-trbv |(47037, 47334)|2.99288400513|(1.000,0.995,0.998)|1
--SVAAGVIQSPRYLIKEKRETATLKCYPIP-R------HDTVYWYQQGPGQDPQ---FL
ISFYE-K--M-QSDKGS-IPDRFSAQ-QFSDYHSELN------MS-SLELGDSALYFCAS
SS-----
>V36RF-AACZ03053988.1-trbv |(55269, 55566)|2.9602624826|(1.000,0.994,0.970)|1
--HMDAGITQSPRHKVTETGTPVTLRCHQTE-N------HRYMYWYRQDPGHGLR---LI
HYSYD-V--K-DTDKGE-VSDGYSVS-RSKTEDFLLT------LE-STTSSQTSVYFCAI
SE-----
>V37RF-AACZ03053989.1-trbv |(6507, 6807)|2.45325717519|(0.957,0.714,1.000)|1
--LIEAGVVQSPRYKIIEKKQPVAFWCNPIS-G------HNTLYWYWQNLGQGPE---LL
IRYEN-E--E-AVDDSQLPKDRFSAE-RLKGVDSTLK------IQ-PAELGDSAVYLCAS
SL-----
>V38RF-AACZ03053989.1-trbv |(12103, 12403)|3.0|(1.000,1.000,1.000)|1
--HTDAGVIQSPRHEVTEMGQEVTLRCKPIS-G------HNSLFWYRQTMMQGLE---LL
IYFNN-N--V-PIDDSGMPKDRFSAK-MPNASFSTLK------IQ-PSEPRDSAVYFCAS
SL-----
>V39RF-AACZ03053991.1-trbv |(6886, 7186)|2.36555753229|(0.880,0.954,0.689)|1
--LIDAGVTQTPRHKVTEMGQEVTMRCQPIL-G------HNTVFWYRQTMMQGLE---LL
AYFRN-R--A-PLDDSGMPKDRFSAE-MLDATLATLK------IQ-PSEPRDSAVYFCAS
GL-----
>V40RF-AACZ03053991.1-trbv |(13707, 14007)|2.94429455551|(0.997,0.956,0.998)|1
--HIEAGVTQFPSHSVIEKGQTVTLRCDPVS-G------HDNLYWYRRVMGNEIK---FL
LHFVK-E--S-KQDESGMPNNRFLAE-RTGGTYSTLK------VQ-PAELEDSGVYFCAS
SQ-----
>V41RF-AACZ03053991.1-trbv |(18826, 19123)|2.96467205249|(0.985,0.986,0.994)|1
--HGDAKVIQNPRYQVTQFEKPVTLGCSQNL-N------HNVMYWYQQKSSQAPK---LL
FHYYD-K--D-FNNE-ADTPDNFQSR-RPNTSFCFLD------IR-SPGLGDAAMYLCAT
SR-----
>V42RF-AACZ03053991.1-trbv |(23811, 24111)|2.99698000014|(0.998,0.999,1.000)|1
--SPGEEVTQTPKHLVRGEGQKAKLYCAPIK-G------HSYVFWYQQVLKKEFK---FL
ISFQN-E--N-VFDKTGMPKERFSAK-CLSNSPCSLE------IQ-ATKLEDSAVYFCAS
SQ-----
>V43RF-AACZ03053991.1-trbv |(41750, 42046)|2.30495800815|(0.966,0.668,0.970)|1
--LSNAGVMQNPRHLVRRRGQEARLRCSPVK-G------HNHVYWYRQLPEEGLK---FM
VYLQK-E--N-IIDESGMPKERFSAE-FPKEGPSILR------IQ-QAVRGDSAAYFCAS
S------
>V44RF-AACZ03053991.1-trbv |(44878, 45175)|2.96074839429|(0.987,1.000,0.975)|1
--TVDGGITQSPKYLFRKEGQNVTLNCEQNL-N------HDAMYWYRQDPGQGLR---LI
YYSQI-V--N-DFQKGD-IAEGYSVS-REKKESFPLT------VT-LAQKNPTAFYLCAS
SI-----
>V45RF-AACZ03053992.1-trbv |(7444, 7744)|2.47343041452|(0.929,0.831,0.808)|1
--STDTKVTQRPRLLVKASEQKAKMDCVPIK-G------HSYVYWYRKKLEEELK---FL
IYFQN-E--E-LIQKAEIINERFLAQ-CPKNSSCTLE------IQ-STESGDTALYFCAS
SK-----
>V46RF-AACZ03053992.1-trbv |(16518, 16818)|2.99498400013|(0.999,0.999,0.997)|1
--SFHAKVTQTPGHLVKGKGQKTKMDCTPEK-G------HVFVYWYQQNQNKEFM---LL
ISFQN-E--Q-VLQETEMHKKRFSSQ-CPKNTPCSLA------IL-SSEPGDTALYLCAS
SQ-----
>V47RF-AACZ03053992.1-trbv |(27256, 27554)|2.51754920221|(0.992,0.992,0.747)|1
--SMDADVTQTPRNRITKTGKRIMLECSQTK-G------HDRMYWYRQDPGLGLR---LI
YYSFD-V--K-DINKGE-ISDGYSVS-RQAQAKFSLS------LE-SAIPNQTALYFCAT
SD-----
>V48RF-AACZ03053992.1-trbv |(41278, 41575)|2.99088400513|(0.998,0.993,1.000)|1
--LMEADIYQTPRYLVIGTGKKIALECSQTM-G------HDKMYWYQQDPGMELH---LI
HYSYG-V--N-STEKGD-LSSESTVS-RIRTEHFPLT------LE-SARPSHTSQYLCAS
SE-----
>V49RF-AACZ03053994.1-trbv |(21067, 21364)|2.97461205453|(0.996,0.992,0.987)|1
--PLEAQVTQNPRYLITVTGKKLTVTCSQNM-N------HDYMSWYRQDPGLGLR---QI
YYSVN-V--E-VIDKGD-VPEGYNVS-RKEKRNFPLI------LE-SPSPNQTSLYFCAS
SL-----
>V50RF-AACZ03053994.1-trbv |(26364, 26661)|2.99799200002|(1.000,0.999,0.999)|1
--LVDVKVTQSSRYLVKRMGEKVFLECVQDM-D------HENMFWYRQDPGLGLR---LI
YFSYD-V--K-MKEKGD-IPEGYSVS-REKKERFSLI------LE-SASTNQTSMYLCAS
SL-----
>V51RF-AACZ03053995.1-trbv |(9498, 9801)|2.68613874128|(0.963,0.817,0.991)|1
-SVFSAVISQKPSRDICQRGTSLTIQCQVNS-Q------VTMMFWYRQQPGQSPT---LI
ATANQGS--E-ATYETGFVIDKFPIS-RPNLTFSTLT------VS-NMSPEDSSIYLCSV
E------
>V52RF-AACZ03066999.1-trbv |(221141, 221441)|2.41379134264|(0.901,0.794,0.802)|1
--SMDTKVTQRPRLLVKANEQKAKTDCVPIK-R------HSYVYWYHKTLEEELK---FL
IYFQN-E--E-IIQKAEIINERFSAQ-CPQNSPCTLE------IQ-STESGDTAWYFCAN
SK-----
>V54RF-AACZ03067000.1-trbv |(17891, 18182)|2.99389600501|(1.000,0.995,0.999)|1
--LMEAEIYQTPRHRVIGTGKKITLECSQTM-G------HDKMYWSRSRNGITPH---PP
FL--W-V--N-STEKGD-LSSESTVS-RIRIERFPLT------LE-SASPSHTSQYLCAS
SE-----
>V55RF-AACZ03067007.1-trbv |(7737, 8040)|2.99699200002|(0.999,0.998,1.000)|1
-SVFSAVISQKPSRDICQRGTSMTIQCQVDSQV-------TMMFWYCQQPGQSMT---LI
ATANQGS--E-ATYESRFVIDKFPIS-RPNLTFSTLT------VS-NRRPEDSSIYLCSV
E------
>V56RF-AACZ03070936.1-igkv |(7433, 7733)|3.0|(1.000,1.000,1.000)|1
-ARCDIQMTQSPSSLSASVGGRVTITCRASQGI------SNNLNWYQQKPGKTPK---LL
IYA------A-SSLQSG-IPSRFSDSG--SGTDYTLT------IS-SLQPEDFATYYCQQ
SDSTP--
>V57RF-AACZ03095312.1-trav |(40528, 40815)|2.92603223422|(0.983,0.972,0.972)|1
--VRSQQPVQSPQAVILREGEDAVINCSSSK-A------LYSVHWYRQKHGEAPV---FL
MMLLKGG--E-Q-----KGHDKISASFNEKKQQSSLY------LM-ASQLSYSGTYFCGA
E------
>V58RF-AACZ03095314.1-trav |(457, 747)|3.0|(1.000,1.000,1.000)|1
-VSSEDKVVQSPLSLVVHEGDTVTLNCSYEVTN------FQSLLWYKQEK-KAPT---FL
FMLTSSG--I-EK-----KSGRLSSILDKKELFSILN------IT-ATQTGDSAIYLCAV
E------
>V59RF-AACZ03095317.1-trdv |(27773, 28074)|2.90655350692|(0.998,0.991,0.934)|1
-SGMAQTVTQSQPEMSVQEAETVTLSCTYDTSE-----SNYYLFWYKQPPSRQMI---LV
IRQEAYK--Q-Q----NATENRFSVNFQKAAKSFSLK------IS-DSQLGDTAMYFCAF
M------
>V60RF-AACZ03095317.1-trav |(36941, 37243)|3.0|(1.000,1.000,1.000)|1
-FSMAQTVTQTQPEMSVQEAETVTLSCTYDTSE-----SDYYLFWYKQPPSRQMI---LV
IRQEAYK--Q-Q----NATENRFSVNFQKAAKSFSLK------IS-DSQLGDAAMYFCAY
RS-----
>V61RF-AACZ03095319.1-trav |(17030, 17318)|2.99494800078|(1.000,0.997,0.998)|1
-LSGELKVEQNPLFLSTQEGKNYTIYCNYSTTS-------DRLYWYRQDPGKSLE---SL
FVLLSNG--A-VK-----QEGQLMASLDTKARLSTLH------IT-AAVHDLSATYFCAV
-------
>V65RF-AACZ03097612.1-trav |(9441, 9731)|2.99899600001|(1.000,0.999,1.000)|1
-MSRGEDVEQSL-FLSVREGDSSVINCTYTDSS------STYLYWYKQEPGAGLQ---LL
TYIFSNM--D-MK-----QDQRLTVLLNKKDKHLSLR------IA-DTQTGDSAIYFCAE
S------
>V66RF-AACZ03097613.1-trav |(2901, 3189)|3.0|(1.000,1.000,1.000)|1
--VKSQKIEQNSEALNIQEGKTATLTCNYTNYS------PAYLQWYRQDPGRGPV---FL
LLIRENE--K-EK-----RKERLKVTFDTTLKQGVFH------IT-ASQPADSATYLCAL
-------
>V67RF-AACZ03097613.1-trav |(17275, 17562)|2.99496000066|(0.999,0.996,1.000)|1
-ANGENQVEHSPHFLGPQQGDVASMSCTYSVSR------FNNLQWYRQNTGMGPK---HL
LSMYSAG--Y-EK-----QKGRLNATLL--KNGSSLY------IT-AVQPEDSATYFCAV
D------
>V68RF-AACZ03097613.1-trav |(45730, 46024)|3.0|(1.000,1.000,1.000)|1
-GINGDSVVQTEGQVLLSEGDSLIVNCSYETTQ------YPSLLWYVQYPGEGPQ---LL
LKAMKAN--D--N--G--RNKGFEATYRKETTSFHLE------KD-SVQESDSAVYFCAL
S------
>V69RF-AACZ03097613.1-trav |(59820, 60113)|3.0|(1.000,1.000,1.000)|1
-GSGKNQVEQSPQSLIILEGKNCTLQCNYTVSP------FNNLRWYKQDTGRGPV---SL
TIMTFSE--N-T-----KSNGRYTATLDADTKQSSLH------IT-ASQLSDSASYICVV
S------
>V70RF-AACZ03097613.1-trav |(75553, 75841)|3.0|(1.000,1.000,1.000)|1
VWSQRKEVEQDPGPFNVPEGATVAFNCTYSNSA------SQSFFWYRQDCRKEPK---LL
MSVYSSG--N-E-------DGRFTAQLNRASQYISLL------IR-DSKLSDSATYLCAV
-------
>V71RF-AACZ03097613.1-trav |(86767, 87064)|2.99389600501|(1.000,0.995,0.999)|1
-TVRAQSVTQPDIHITVSEGASLELRCNYSYGA------TPSLFWYVQSPGQGLQ---LL
LKYFSGD--T-LV--Q--GIKGFEAEFKRSQSSFNLR------KP-SVHWSDAAEYFCAV
G------
>V72RF-AACZ03097614.1-trav |(12294, 12584)|2.99296000066|(0.999,0.998,0.996)|1
--VNGENVEQHPSTLSVQEGDGAVIKCTYSDSA------SNYFPWYKQELGKGPQ---LI
IDIHSNM--G-EK-----KDQRIAVTLNKTAKHFSLH------IT-ETQPEDSAVYFCAA
S------
>V73RF-AACZ03097614.1-trav |(31772, 32063)|2.98798000014|(0.997,0.996,0.995)|1
VWSQQKEVEQNSGPLSVPEGAIVSLNCTYSDRR------SQSFFWYRQYSGKSPE---LI
MSIYSNG--D-E------EDGKFTAQLNKASQYVSLL------IR-DSQPSDSATYLCAV
-------
>V74RF-AACZ03097614.1-trav |(38270, 38567)|3.0|(1.000,1.000,1.000)|1
-GTRAQSATQLDSHVSVSEGALVLLRCNYSSSV------PPYLFWYVQYPNQGLQ---LL
LKYTTGA--T-LV--K--GINGFEAEFKKSETSFHLT------KP-SAHVNDAAEYFCAV
S------
>V76RF-AACZ03097618.1-trav |(4827, 5130)|3.0|(1.000,1.000,1.000)|1
-PGIAQKITQTQPGMFVQEKEAVTLDCTYDTSD-----QSYGLFWYKQPSSGEMI---FL
IYQGSYD--Q-Q----NATEGRYSLNFQKARKSANLV------IS-ASQLGDSAMYFCAM
KE-----
>V77RF-AACZ03097618.1-trav |(21644, 21938)|3.0|(1.000,1.000,1.000)|1
-RTRGDSVTQMEGPVTLSEEAFLTINCTYTATG------YPSLFWYVQYPGEGLQ---LL
LKATKAD--D--K--G--SNKGFEATYRKETTSFHLE------KD-SVQASDSAVYFCAL
S------
>V78RF-AACZ03097619.1-trav |(24003, 24296)|3.0|(1.000,1.000,1.000)|1
VWSQQKEVEQDPGPLSVPEGAIASLNCTYSNSA------FQYFMWYRQYSRKGPE---LL
MYTYSSD--N-K------EDGRFTAQVDKSSKYISLF------IR-DSQPSDSATYLCAM
S------
>V80RF-AACZ03097619.1-trav |(56042, 56329)|2.99899200002|(0.999,1.000,1.000)|1
--VNSQQGEEDPQALSIQEGENAIMNCSYKTS-------INNLQWYRQNSGRGLV---HL
ILIRSNE--R-EK-----HSGRLRVTLDTSKKSSSLL------IT-ASRAADTASYFCAT
D------
>V81RF-AACZ03097619.1-trdv |(66115, 66418)|3.0|(1.000,1.000,1.000)|1
-SSMAQKVTQAQTEISVVEKEDVTLDCVYETRD-----TTYYLFWYKQPPSGELV---FL
IRRNSFD--E-Q----NEISGRYSWNFQKSTSSFNFT------IT-ASQVVDSAVYFCAL
SE-----
>V82RF-AACZ03097619.1-trav |(99749, 100036)|2.98742416586|(1.000,1.000,0.988)|1
-LSGEDQVTQSPEALRLQEGESSSLNCSYTVSG------LRGLFWYRQDPGKGPE---FL
FALYSAG--E-EK-----EKERLKATLTKK--ESFLH------IT-APKPEDSATYLCAV
Q------
>V85RF-AACZ03097622.1-trdv |(8097, 8397)|2.9451025444|(0.995,0.972,0.981)|1
-SSVAQKVTQAQSSVSMPVRKAVTLNCLYEASWW-----SYYIFWYKQLPSKEMV---FL
IRQGSGE--Q-N-----AKSGRYSVNFKKAAKSVALT------IS-ALQLEDSAKYFCAF
WE-----
>V86RF-AACZ03097622.1-trav |(17372, 17662)|2.22615921514|(0.981,0.642,0.972)|1
-VSSILNVEQSPQSLHVQEGDSTNFTCSFTSSN------FYALHWYRWETAKSPE---AL
FVMTLNG--D-EK-----KKGRISATLNTKEGYSYLY------IK-GSQPEDSATYLCAF
-------
>V87RF-AACZ03097624.1-trav |(2805, 3104)|2.24986913738|(0.982,0.949,0.661)|1
--VNGQQVMQIPQYQHVQEGEDFTTYCNSST-T------LSNIQWYKQRPGGHPV---FL
IQLVKSG--E-V-----KKQKRLTFQFGEAKKNSSLH------IT-ATQTTDVGTYFCAG
HSAPQ--
>V88RF-AACZ03097624.1-trav |(14019, 14309)|2.24564394251|(0.912,0.634,0.989)|1
--TIIDAKTTQPTSMDCAEGRAANLPCNHSTIS-----GNEYIHWYRQIHSQGPQ---YI
IHGLKNN--E--------TNEMASLIITEDRKSSTLI------LP-HATLRDTAVYYCIV
RV-----
>V89RF-AACZ03097899.1-ighv |(18928, 19237)|2.99499200002|(0.999,0.998,0.998)|1
-TYSQVQLVQS-GHEVKQPGASVKVSCKASGYSF--T--TYGMNWVRQAPGQGLE---WM
GWFNTYT--G-NPTYAQGFTGRFVFSMDTSVSTAYLQ------IS-SLKAEDTAMYYCAR
-------
>V90RF-AACZ03097899.1-ighv |(75199, 75508)|3.0|(1.000,1.000,1.000)|1
-VQCEVQLLES-GGGLVQPGGSLRLSCAASGFTF--S--SYWMHWVRQAPGKGLE---WV
SRINS--DGS-STSYADSVKGRFTISRDNAKNTLYLQ------MN-SLRAEDTAVYYCTR
-------
>V91RF-AACZ03097899.1-ighv |(83090, 83405)|3.0|(1.000,1.000,1.000)|1
-VQCEVQLVES-GGGLVQPGGSLRLSCAASGFTF--S--GSAMHWVRQASGKGLE---WV
GRIRSKANSY-ATAYAASVKGRFTISRDDSKNTAYLQ------MN-SLKTEDTAVYYCAR
-------
>V92RF-AACZ03097900.1-ighv |(7950, 8265)|2.99799600001|(0.999,1.000,0.999)|1
-VQCEVQLLES-GGGLVQPGGSLRLSCAASGFTF--S--DYYMDWVRQAPGKGLE---WV
GRIRNKANSY-TTEYAASVKGRFTISRDDSKNSLYLQ------RN-SLKTEDTAVYYCTR
-------
>V93RF-AACZ03097900.1-ighv |(23404, 23719)|2.99371202074|(0.994,1.000,1.000)|1
-VQCEVQLVES-RGGLVQPGGSLRLSCAVSGFTF--S--DYYMSWVRQAPGKGLE---WV
GFIRNKANGG-TTEYTTSVKGRFTISRDDSKSITYLQ------MN-SLKTEDTAVYYCSR
-------
>V94RF-AACZ03097900.1-ighv |(27981, 28295)|2.28507000185|(0.965,0.723,0.854)|1
-VLSQVTLKES-GPALVKPTETLTLTCTFSGFSL--STSGMRVSWIRQPPGKALE---WL
ARIDWD---D-DKYYSTSLKTRLTISKDTSKNQVVLT------MT-NMDPVDTATYYCAR
I------
>V95RF-AACZ03097900.1-ighv |(37008, 37317)|2.66764483193|(0.988,0.968,0.820)|1
-VQSQVQLVQS-GAEVKKPGSSVKVSCKVSGGTF--S--SYAISWVRQAPGQGLE---WM
GVIIPIL--G-TANYAQKFQGRVTITADESTSTAYME------LS-SLRSEDTAVYYCAT
-------
>V96RF-AACZ03097900.1-ighv |(75733, 76039)|3.0|(1.000,1.000,1.000)|1
-VQCEVQLVES-GGGLVQPGGSLRLSCAASGFTF--S--SYHMSWVRQAPGKGLE---WV
SVIYSGG----STYYADSVKGRFTISRDNSKNTLYLQ------MN-SLRAEDTAVYYCAR
-------
>V97RF-AACZ03097900.1-ighv |(92730, 93036)|3.0|(1.000,1.000,1.000)|1
-VQCEVQLVES-GGGLVQPGGSLRLSCAASGFTF--S--SYAMHWVRQAPGKGLE---WV
SLIYSG---D-STYYADSVKGRFTISRDNSKNTLYLQ------MG-SLRAEDTAVYYCAR
-------
>V98RF-AACZ03097904.1-ighv |(3428, 3734)|2.99899600001|(1.000,0.999,1.000)|1
-VLSQLQLQES-GPGLVKPSETLSLTCTVSGGSI--S--SYYWSWIRQPPGKGLE---WI
GYIYY-S--G-SAYYNPSLKSRVTISVDTSKNQFSLK------LS-SVTAADTAVYYCAR
-------
>V99RF-AACZ03097905.1-ighv |(2226, 2538)|2.8368427581|(0.983,0.892,0.995)|1
-VLSQLQLQES-GPGLVKPSQTLSLTCTVSGGSI--SSGSYYWSWIRQPAGKGLE---WI
GNIYY-S--G-STYYNPSLKSRVTISVDTSKNQFSLK------LS-SVTAADTAVYYCAR
-------
>V100RF-AACZ03097906.1-ighv |(13610, 13916)|3.0|(1.000,1.000,1.000)|1
-VQCEVQLVES-GGGLVQPGGSLRLSCAASGFTV--S--SYHMSWVRQAPGKGLE---WV
SVIYSGG----STYYADSVKGRFTISRDNSKNTLYLQ------MN-SLRAEDTAVYYCAR
-------
>V101RF-AACZ03097906.1-ighv |(27525, 27832)|2.61199677071|(0.990,0.987,0.787)|1
-VCAEVQLVQS-GAEVKKPGESLKISCKGSGYSF--T--SYWIGWVRQMPGKGLE---WM
GIIYPGD--S-DTRYSPSFQGQVTISADKSISTAYLQ------WS-SLKASDTAMYYCA-
-------
>V102RF-AACZ03097906.1-ighv |(49257, 49572)|3.0|(1.000,1.000,1.000)|1
-VQCEVQLVES-GGGLVQPGRSLRLSCTASGFTF--G--DYAMSWIRQAPGKGLE---WV
GFIRSKAYGG-TTEYAASVKGRFTISRDDSKSIAYLQ------MN-GLKTEDTAVYYCTR
-------
>V104RF-AACZ03097906.1-ighv |(72260, 72569)|2.99899200002|(0.999,1.000,1.000)|1
-AHSQVQLVQS-GAEVKKPGASVKVSCKASGYTF--T--SYTISWLRQAPGQGLE---WM
GVISPSD--G-STSYAQKFQGRVTMTRDTSTSTVYME------LS-SLRSEDTAVYYCAR
-------
>V105RF-AACZ03097906.1-ighv |(76385, 76694)|2.99899600001|(1.000,0.999,1.000)|1
-AYSQMQLVQS-GAEVKKPGSSVKVSCKASGYTF--T--YRYLHWVRQAPGQALE---WM
GWITPYN--G-NTNYAQKFQDRVTITRDRSMSTAYME------LR-SLRSEDSAVYYCAR
-------
>V106RF-AACZ03097910.1-ighv |(1033, 1344)|2.99593600205|(1.000,1.000,0.996)|1
-VQCEVQLVES-GGGVVQPGGSLRLSCAASGFTF--D--DYAMHWVRQAPGKGLE---WV
SLISWD--GG-STYYADSVKGRFTISRDNSKNSLYLQ------MN-SLRAEDTALYYCAK
D------
>V107RF-AACZ03097912.1-ighv |(17400, 17707)|2.98028822908|(0.999,0.996,0.986)|1
-VQCEVQLVES-GGGLVQPESSLKLSCAASGFTF--S--SYAMNWVRQAPGKGLE---WV
AHIWND--GS-QKYYADSVKGRFTISRDNSKSMLYLQ------MD-SLKAEDTAMYYCT-
-------
>V108RF-AACZ03097916.1-ighv |(3845, 4154)|2.99698000014|(1.000,0.998,0.999)|1
-VLSQVQLQES-GPGLVKPSETLSLTCAVSGYSI--SSG-YYWGWIRQPPGKGLE---WI
GSIYHS---G-STYYNPSLKSRVTISVDTSKNQFSLK------LS-SVTAADTAVYYCAR
-------
>V109RF-AACZ03097919.1-ighv |(14915, 15224)|2.66580713845|(0.914,0.844,0.928)|1
-VQCEVQLVES-GGGLVQPGGSLRLSCAASGFTF--S--NSDTNWVHQAPGKGLE---LV
SGVSW--NGS-RMHYADSVKGRFIISRDNSRNSLYLQ------TN-SLRAEDTAVYYCVR
-------
>V110RF-AACZ03098145.1-ighv |(4162, 4471)|2.99371202074|(0.994,1.000,1.000)|1
-VQCQVQLVES-GGGVVQPGRSLRLSCAASGFTF--S--SYGMHWVRQAPGKGLE---WV
AFISYDG--S-NKHYADSVRGRFTISRDNSKNTLYLQ------MN-RLRAEDTAVYYCAR
-------
>V111RF-AACZ03098146.1-ighv |(6178, 6490)|2.83534405623|(1.000,0.886,1.000)|1
-VLSQVQLQES-GPGLVKPSQTLSLTCAVSGGSI--TSGYYYWSWIRQPPGKGLE---WI
GGIYTS---G-STYYNPSLKSRVTISVDTSKNQFSLK------LS-SVTAADTAVYYCAR
-------
>V113RF-AACZ03098176.1-ighv |(689, 998)|2.97374467291|(0.999,0.994,0.982)|1
-VQCQVRLVES-GGGVVQPGRSLRLSCAASGFTF--S--SYGMHWVRQAPGKGLE---WV
AFIQYDG--S-NKYYADSVKGRFTISKDNSKNTLYLQ------MN-SLRAEDTAVYYCAR
-------
>V114RF-AACZ03102011.1-ighv |(12521, 12836)|2.59973593989|(0.968,0.999,0.775)|1
-VQCEVQLVES-GGGLVQPGGSLRLSCAASGFTF--S--DHYMSWVRQAQGKGLE---LV
GLIRNKANSY-TTEYAASVKGRFTISREDLKNTLYLQ------MS-SPKTEDLAVYYCAR
-------
>V115RF-AACZ03102011.1-ighv |(35465, 35774)|2.34087112165|(0.889,0.859,0.713)|1
-AQSRVQLVQS-GAEVKKPGASVKVSCKASGYTF--T--SYCMHWVRQAHAQGLE---WM
GLVCPSD--G-STSHAQKFQGRVTITRDTSMSTAYME------LS-SLRSEDMAMYYCVR
-------
>V116RF-AACZ03106490.1-ighv |(5495, 5804)|3.0|(1.000,1.000,1.000)|1
-VQCEVQLVES-GGGLVQPGGSLRLSCAASGFTF--S--SYWMHWVRQAPGKGLV---WV
SRINSD--GS-STSYADSLKGQFTISRDNAKNTLYLQ------MN-SLRAEDMAVYYCTR
-------
>V117RF-AACZ03107095.1-ighv |(2793, 3107)|2.60817252732|(0.932,0.830,0.893)|1
-VLSQVTLKES-GPALVKPTETLTLTCTLSGFSL--STSGMGMSWIRQPPGKALE---WL
AHIFSN---D-KKSYSTSLKNRLIISKDTSKSQVVLT------MT-NMDPVDTATYYCAW
R------
>V118RF-AACZ03126842.1-igkv |(17937, 18255)|2.37945765534|(0.983,0.690,0.998)|1
-SSGDIVMTQTPLSLPVTPGEPASISCRSSESLLDTDDEHTYLNWYLQKPGQSPQ---LL
IYE------V-SNRASG-VPDRFSGSG--SGTDFTLK------IS-RVEAEDVGVYYCMQ
ALQTP--
>V119RF-AACZ03126842.1-igkv |(27906, 28206)|2.99598000014|(0.999,1.000,0.997)|1
-ARCDIQMTQSPSSLSASVGDRVTITCRASQGI------SNNLNWYQQKPGKTPK---LL
IYA------A-SSLQSG-IPFRFSDSG--SGTDYTLT------IS-SLQPEDFATYYCQQ
SDSTP--
>V120RF-AACZ03127129.1-iglv |(13910, 14207)|2.99696400065|(1.000,0.997,1.000)|1
-SVASYELTQP-SSVSVSPGQTARITCSGDV--L---AK-NYARWFQQKPGQAPV---LV
IYK------D-SERPSG-IPERFSGSS--SGTTVTLT------IS-GAQVEDEADYYCYS
AADNN--
>V121RF-AACZ03127129.1-iglv |(32581, 32884)|3.0|(1.000,1.000,1.000)|1
-SEASYELTQP-PSVSVSPGQTARITCSGDA--L---PK-QYAYWYQQKPGQAPV---LV
IYK------D-SERPSG-IPERFSGSS--SGTTVTLT------IS-GVQAEDEADYYCQS
ADSSGTY
>V122RF-AACZ03127131.1-iglv |(7169, 7472)|2.99798400013|(1.000,1.000,0.998)|1
-SVTSYELTQP-PSVSVAPGQTARITCGGNN--I---GS-KAVHWYQQKPGQAPV---LV
IYY------D-SDRPSG-IPERFSGSN--SGNTATLT------IS-RVEAGDEADYYCQV
WDSSSKH
>V123RF-AACZ03127131.1-iglv |(15097, 15400)|3.0|(1.000,1.000,1.000)|1
-SVVSSELTQD-PAVSVALGQTVRITCQGDSL------RSYYASWYQQKPGQAPV---LV
IYG------N-NNRPSG-IPDRFSGSS--SGNTASLT------IT-GAQAEDEADYYCSS
LDSSGNH
>V124RF-AACZ03127135.1-iglv |(12358, 12661)|2.99288400513|(1.000,0.995,0.998)|1
-SEASYELTQP-PSVSVSLGQTARITCSGEA--L---PK-KYAYWYQQKPGQAPV---LV
IYK------D-SERPSG-IPERFSGSS--SGTIVTLT------IS-GVQAEDEADYYCQS
ADSSGTY
>V126RF-AACZ03127139.1-iglv |(1837, 2140)|2.66582619759|(0.974,0.959,0.822)|1
-SATSYELTQP-HSVSVATAQMARITCGGNN--I---GS-KAVHWYQQKPGQDPV---LV
IYS------D-SNRPSG-IPERFSGSN--SGNTATLT------IS-RVEAGDEVDYYCQV
WDSSSDH
>V127RF-AACZ03127139.1-iglv |(22125, 22435)|2.94960484445|(0.988,0.993,0.970)|1
-SWAQSALTQP-PSVSRSPGQSVTISCTGTSSDV---GGYNYVSWYQQHPGKAPK---LM
IYD------V-SKRPSG-VPDRFSGSK--SGNTASLT------IS-GLQAEDEADYYCCS
YAGSYS-
>V128RF-AACZ03127139.1-iglv |(41415, 41718)|3.0|(1.000,1.000,1.000)|1
-SEASYELTQP-PSVSVSPGQTARITCSGDA--L---PK-QYAYWYQQKSGQAPV---LI
IYE------D-SKRPSG-IPERFSGSS--SGTMATLT------IS-GAQVEDEADYYCYS
TDSSGNH
>V130RF-AACZ03127139.1-iglv |(52418, 52728)|2.75272179272|(0.998,0.997,0.846)|1
-SWAQSALTQP-PSASGSPGQSVTISCTGTSSDI---GGYNYVSWYQQHPGKAPK---LM
IYE------V-SKRPSG-VPDRFSGSK--SGNTASLT------VS-RLQAEDEADYYCSS
YAGSNN-
>V132RF-AACZ03127143.1-iglv |(3944, 4240)|2.99899600001|(1.000,0.999,1.000)|1
-SVASYELTQP-PSVSVSPGQTASITCSGDK--L---GD-KYAYWYQQKSGQSPV---LV
IYQ------D-SKRPSG-IPERFSGSN--SGNTATLT------IS-GTQAMDEADYYCQA
WDSST--
>V133RF-AACZ03151853.1-igkv |(10232, 10550)|2.37243766625|(0.989,0.695,0.981)|1
-TSGDIVMTQTPLSLPVTPGEPASISCRSSQSLLDSDDGNTYLDWFLQKPEQSPQ---LL
IYE------V-SNWASG-VPDRFSGSG--SGTDFTLK------IS-RVEAEDVGVYYCMQ
ALQTP--
>V135RF-AACZ03151853.1-igkv |(48491, 48784)|3.0|(1.000,1.000,1.000)|1
-ARCDIQMTQSPSSLSASVGDRVTITCRASQSI------SNYLSWYQQKPGKAPK---LL
IYD------A-STLQSG-VPSRFSGSG--SGTDFTLT------IS-SLQPEDFATYYCQR
GYG----
>V136RF-AACZ03151853.1-igkv |(70778, 71078)|2.99067605248|(1.000,0.991,1.000)|1
-ARCDIQLTQSPSSLSASVGDRVTITCQASQDI------SNYLNWYQQKPGKVPK---LL
IYS------A-SNLQSG-VPSRFSGSG--SGTDFTLT------IS-SLQPEDVATYYCQR
TYNAP--
>V138RF-AACZ03151853.1-igkv |(122999, 123314)|2.59668458672|(0.970,0.880,0.842)|1
-SSGDVVMTQSPLSLPVTLGQPASISCRSSQSLVY-SDGNTYLSWIQQRPGQPPR---LL
IYK------V-SNRDSG-VPDRFSGSG--AGTDFTLK------IS-RVEAEDVGVYYCVQ
GIQLP--
>V139RF-AACZ03151853.1-igkv |(133574, 133889)|2.99493200206|(1.000,0.999,0.996)|1
-SSADIVMTQTPLSLSVTPGQPASISCKSSQSLL-HSDGNTYLYWYLQKPGQSPQ---LL
IYR------V-SNRASG-VPDRFSGSG--SGTDFTLK------IS-QVEAEDVGVYYCMQ
GIQLP--
>V140RF-AACZ03151853.1-igkv |(146050, 146365)|2.98197252412|(1.000,0.984,0.999)|1
-SSGDIVMTQSPLSLPVTPGEPASISCRSSQSLLHS-NRYNYLDWYLQKPGQSPQ---LL
IYL------G-SNRASG-VPDRFSGSG--SGTDFTLK------IS-RVEAEDVGVYYCMQ
ALQTP--
>V141RF-AACZ03151853.1-igkv |(154335, 154635)|2.99067605248|(1.000,0.991,1.000)|1
-TRCDIQMTQSPSSLSASVGDRVTITCWASQGI------SNYLAWYQQKPGKVPK---LL
IYA------A-STLQSG-VPSRFSGSG--SGTDFTLT------IS-SLQPEDVATYYCQK
YNSAP--
>V142RF-AACZ03151853.1-igkv |(190625, 190927)|2.99799600001|(0.999,1.000,0.999)|1
-SSGDIVMTQTPLSSPVTLGQPASISCRSSQSLVH-SDGNTYLSWLQQRPGQPPR---LL
IYK------V-SNRFSG-VPDRFSGSG--AGTDFTLK------IS-RVEAEDVGVYYCTQ
A------
>V143RF-AACZ03151853.1-igkv |(207246, 207544)|2.44371239815|(0.995,0.718,0.995)|1
-SRGEIVLTQSPDFQSVPPKEKVTITCRASQS------IGSSLHWYQQKPGQSPK---LL
IKY------A-SQSISG-VPSRFSGSG--SGTDFTLT------IN-SLEAEDAATYYCQQ
SSSL---
>V144RF-AACZ03151855.1-igkv |(12698, 12994)|2.99698000014|(1.000,0.998,0.999)|1
-TTGEIVLTQSSATLSLSPGERATLSCRASQSV-----SSSYLAWYQQKPGQAPR---LL
IYD------A-SSRATG-IPDRFSGSG--SGTDFTLT------IS-RLEPEDFAVYYCQQ
YGS----
>V145RF-AACZ03151855.1-igkv |(28194, 28494)|2.99899600001|(1.000,0.999,1.000)|1
-ARCDIQMTQSPSSLSASVGDRVTITCRASQGI------SNYLAWFQQKPGKAPK---RL
IYA------A-SSLQSG-VPSRFSGSG--SGTEFTLT------IS-SLQPEDFATYYCLQ
HNSYP--
>V146RF-AACZ03151855.1-igkv |(45639, 45939)|2.99798400013|(1.000,0.998,1.000)|1
-ARCDIQMTQSPSSLSASVGDRVTITCRASQGI------SSWLAWYQQKPGKAPK---PL
IYA------A-SSLQSG-VPSRFSGSG--SGTEFTLT------IS-SLQPEDFATYYCQQ
YNSYP--
>V147RF-AACZ03151855.1-igkv |(60285, 60585)|2.65716620566|(0.947,1.000,0.802)|1
-TTGEIVLTQSPATLSLSPGERATLSCRASQSV------SSYLAWYQQKPGQAPR---LL
IYG------A-SNRATG-IPARFSGSG--SRTDFTLT------IS-SVEPEDFAVYYCQQ
YNNQP--
>V148RF-AACZ03151857.1-igkv |(4301, 4601)|3.0|(1.000,1.000,1.000)|1
-ARCAIQLTQSPSSLSASVGDRVTITCRASQGI------SNRLNWYQQKPGKAPK---LL
IYD------A-SSLESG-VPSRFSGSG--SGTDFTLT------IS-SLQPEDFATYYCQQ
FNSYP--
>V149RF-AACZ03151857.1-igkv |(10072, 10372)|2.98297652411|(1.000,1.000,0.984)|1
-ASCDIQMTQSPSSVSASVGDRVTITCQASQGI------SSWLAWYQQKPGKAPK---LL
IYA------A-SSLQSG-VPSRFSGNG--SGTDFTLT------IS-SLQPEDFATYYCQQ
ANSFP--
>V150RF-AACZ03151858.1-igkv |(2327, 2627)|2.99899600001|(1.000,1.000,0.999)|1
-TTGEIVLTQSPATLSLSPGEKATLSCRASQSV------SSYLAWYQQKPGQAPR---LL
IYD------A-SNRATG-ISARFSGSG--SGTDFTLT------IS-SLEPEDFAVYYCQQ
RSNWH--
>V151RF-AACZ03151858.1-igkv |(39404, 39704)|2.99174403277|(1.000,0.992,1.000)|1
-ARCAIQMTQSPSSLSASVGDRVTITCRASQGI------SSYLAWYQQKPAKAPK---LL
IYY------A-SSLQSG-VPSRFSGSG--SGTEFTLT------IS-SLQPEDFATYYCQQ
LNSYP--
>V153RF-AACZ03151979.1-igkv |(10219, 10519)|2.99799600001|(0.999,1.000,0.999)|1
-AKCDIQMTQSPSTLSASVGDRVTITCRASQGI------SSYLNWYQQKPGKAPK---LL
IYA------A-STLESG-VPSRFSGSG--SGTEFTLT------IS-SLQPDDFATYYCQQ
YSSTP--
>V154RF-AACZ03171037.1-ighv |(18459, 18781)|2.20297612256|(0.774,0.650,0.913)|1
-VLSQVTLKES-GPVLVKPTETLTLTCTISGFSL--SNAGMGVSWIRQPPGKALE---WL
AHIFWN---D-EKSYSTSLKSRLTISKDTSKSQVVLT------MT-NMDPVDTATYYCTR
RAQ----
>V155RF-AACZ03171037.1-ighv |(42750, 43059)|2.74120395011|(0.985,0.842,0.993)|1
-THAQVQLVQS-GAEVKKPGATVKISCKASGYTL--T--ELSMHWVRQAPGKRLE---WM
GGFDPED--G-ETIYAQKFQGRVTMTEDTSTDTAYME------LS-SLRSEDTAVYYCAT
-------
>V156RF-AACZ03171037.1-ighv |(52793, 53102)|2.99899200002|(0.999,1.000,1.000)|1
-VQCEVQLVES-GGGLVKPGGSLRLSCAASGFTF--S--SYAMHWVRQAPEKGLE---WV
STISG--SGG-STWYPDSVKGRFTISRDNSKNTLYLQ------MN-SLRAEDTAVYYCAR
-------
>V157RF-AACZ03171037.1-ighv |(63661, 63976)|3.0|(1.000,1.000,1.000)|1
-VQCEVQLVES-GGGLVKPGGSLRLSCAASGFTF--S--SYSMNWVRQAPGKGLE---WV
GFIRTKAKGG-TTEYAASVKGRFTISRDDSKSIAYLQ------MN-SLKTEDTAVYYCTR
-------
>V158RF-AACZ03171037.1-ighv |(86377, 86686)|3.0|(1.000,1.000,1.000)|1
-VQCEVQLVES-GGGLVQPGGSLRLSCAASGFTF--S--SYGMHWVRQAPGKGLE---WV
SYISYDS--S-YIYYADSVKGRFTISRDNAKNSLYLQ------MN-SLRAEDTAVYYCAT
-------
>V159RF-AACZ03171037.1-ighv |(116832, 117141)|2.994900005|(1.000,1.000,0.995)|1
-VQCEVQLVES-GGGLVQPGGSLRLSCAASGFTF--D--DYGMSWVRQAPGKGLE---WV
SLISWD--GG-STYYADSVKGRFTISRDNSKNSLYLQ------MS-SLRAEDTALYYCAR
-------
>V160RF-AACZ03171037.1-ighv |(129850, 130159)|2.99899600001|(1.000,1.000,0.999)|1
-AHSQVQLVQS-GAEVKKPGASVKVSCKASGYTF--T--SYDINWVRQATGQGLE---WM
GWMNPNS--G-NTGYAQKFQGRVTMTRDTSISTAYME------LS-SLRSEDTAVYYCAR
-------
>V161RF-AACZ03171037.1-ighv |(150598, 150907)|2.99598000014|(0.999,0.997,1.000)|1
-VQCEVQLVES-GGGLVQPGGSLTLSCAASGFTF--S--SYWMSWVRQAPGKGPE---WV
ANIKK--DGS-EKYYADSVKGRFTISRDNAKNSLYLQ------MN-SLRAEDTAVYYCTR
-------
>V164RF-AACZ03171037.1-ighv |(187799, 188108)|2.99496000066|(0.999,1.000,0.996)|1
-AHSQVQLVQS-GSEVKKPGASVKVSCKASGYTF--T--SYAMNWVRQAPGQGLE---WM
GWINTNT--G-NPTYAQGFTGRFVFSLDTSVSTAYLQ------IS-SLKAEDTAVYYCAR
-------
>V165RF-AACZ03171037.1-ighv |(200692, 201001)|2.99699200002|(0.999,1.000,0.998)|1
-VLSQVQLQES-GPGLVKPSETLSLTCAVSGGSI--SSS-NWWSWVRQPPGKGLE---WI
GEIYH-S--G-SPNYNPSLKSRVTISVDKSKNQFSLK------LS-SVTAADTAVYYCAR
-------
>V166RF-AACZ03171395.1-trav |(594, 882)|3.0|(1.000,1.000,1.000)|1
--VKSQKIEQNSEALNIQEGKTATLTCNYTNYS------PAYLQWYRQDPGRGPV---FL
LLIRENE--K-EK-----RKERLKVTFDTTLKQGVFH------IT-ASQPADSATYLCAL
-------
>V169RF-AACZ03176953.1-iglv |(11235, 11544)|2.58415056948|(0.997,0.773,0.996)|1
-SWAQSVLTQP-PSVSAAPGQKVTISCSGSSCNI---GNN-YVSWYQQLPGTAPK---IL
IYD------N-NKRPSG-ISDRFSGSK--SGTSATLG------IT-GLQTGDEADYYCGT
WDSSLSA
>V170RF-AACZ03176953.1-iglv |(41685, 41995)|2.54331627949|(0.988,0.788,0.929)|1
-SLSQPVLTQP-TSLSASPGASARLTCTLRSGIN---LGSYRIYWYQQKPGSPPR---YL
LRYKSDS--D-KQQGSG-VPSRFSGSKDASTNAGILV------IS-GLQSEDEADYYCMI
-------
>V171RF-AACZ03176953.1-iglv |(46517, 46826)|3.0|(1.000,1.000,1.000)|1
-SWAQSVLTQP-PSASGTPGQRVTISCSGSSSNI---G-SNTVNWYQQLPGTAPK---LL
IYS------N-NQRPSG-VSDRFSGSK--SGTSASLA------IS-GLRSEDEADYYCAA
WDDSLSG
>V172RF-AACZ03176965.1-iglv |(24589, 24892)|2.28862953201|(0.792,0.879,0.689)|1
-SWAQSALTQP-PFVSGAPGQSVTISCTGTSSDV---GDYDHVFWYQKRLSTTSR---LL
IYN------V-NTRPSG-ISDLFSGSK--SGNMASLT------IS-GLKSEVEANYHCSL
YSSS---
>V173RF-AACZ03176987.1-iglv |(5895, 6205)|2.99174403277|(1.000,0.992,1.000)|1
-SWANFMLTQP-HSVSESPGQTVTISCTRSSGSI---AS-DYVQWYQQRPGSAPT---TV
IYE------D-NRRPSG-VPDRFSGSIGSSSNSASLT------IS-GLKSEDEADYYCQS
YDSSS--
>V174RF-AACZ03179884.1-ighv |(12665, 12971)|2.99480001|(0.995,1.000,1.000)|1
-VQCEVQLVQS-GGGLVQPGGSLRLSCAGSGFTF--S--SYAMHWVRQAPGKGLE---WV
SAIGTG---G-GTYYADSVKGRFTISRDNAKNSLYLQ------RN-SLRAEDMAVYYCAR
-------
>V175RF-AACZ03182257.1-ighv |(5938, 6245)|2.99696400065|(1.000,1.000,0.997)|1
-AQCEVQLVES-GGGLVQPGGSLRLSCAASGFTF--S--NHYTSWVLQAPGKGLE---WV
SYISG--DRG-YTNYADSVKGRFTISRDNAKNSLYLQ------MN-SLRAEDTAVYYCV-
-------
>V176RF-AACZ03015561.1-igkv |(2130, 2430)|2.97169465218|(0.999,1.000,0.975)|-1
-AKCDIQMTQSPSTLSASVGDRVTITCRASQGI------SSWLAWYQQKPGKAPK---LL
IYK------A-SSLESG-VPSRFSSSG--SGTEFTLT------IS-SLQPDDFATYYCQQ
YSSYP--
>V177RF-AACZ03015561.1-igkv |(34244, 34556)|2.97942016586|(0.997,0.998,0.985)|-1
-CNGDIVLTQSPASLAVSPGQRATITCRASESVS--FLGINLIHWYQQKPGQPPK---LL
IYQ------A-SNKDTG-VPARFSGSG--SGTDFTLT------IN-LVEANDTANYYCLQ
SKNFP--
>V178RF-AACZ03015562.1-igkv |(7056, 7356)|3.0|(1.000,1.000,1.000)|-1
-TRCDIQMTQSPSSLSASVGDRVTITCRASQGI------SNYLAWYQQKPGKAPK---LL
IYY------A-SRLESG-VPSRFSGSG--SGTDYTLT------IS-SLQPEDFATYYCQQ
YNSNP--
>V179RF-AACZ03015562.1-igkv |(21131, 21434)|2.99593600205|(1.000,1.000,0.996)|-1
-TIGEIVMTQSPATLSLSPGERATLSCRASQSV-----SSSYLSWYQQKPGQAPR---LL
IYG------A-STRATG-IPARFSGSG--SGTDFTLT------IS-SLQPEDFAVYYCQQ
DYKLP--
>V180RF-AACZ03015562.1-igkv |(33603, 33903)|2.99696400065|(1.000,0.997,1.000)|-1
-ARCDIQMTQSPSSLSASVGDRVTITCRASQGI------RNDLGWYQQKPGKAPK---LL
IYA------A-SSLQSG-VPSRFSGSG--SGTDFTLT------IS-SLQPEDFATYYCLQ
DYNYS--
>V181RF-AACZ03015564.1-igkv |(7726, 8026)|3.0|(1.000,1.000,1.000)|-1
-TRCDIQMTQSPSSLSASVGDRVTITCRASQSI------SNSLAWYQQKPGKAPK---LL
IYA------A-SRLESG-VPSRFSGSG--SGTDYTLT------IS-SLQPEDFATYYCQQ
YYSTP--
>V182RF-AACZ03015754.1-igkv |(14686, 14986)|3.0|(1.000,1.000,1.000)|-1
-ARCDIQVTQSPSSLSASVGDRVTITCRTSQGI------SNGLSWYQQKPGQAPT---LL
IYA------A-SSLQSG-IPSRFSGSG--SGTDFTLT------IS-SLQPEDVATYYCLQ
DYTTP--
>V183RF-AACZ03016034.1-igkv |(14230, 14530)|2.77445712047|(0.993,0.855,1.000)|-1
-ARCDIPMTQSPSSLSASVGDRVTITCRASQGI------SNNLNWYQQKPGKTPK---LL
IYA------A-SSLQSG-IPSRFSDSG--SGTDYTLT------IS-SLQPEDFAAYYCQQ
SDSTP--
>V184RF-AACZ03016143.1-igkv |(754, 1054)|2.95805224805|(0.997,0.970,0.994)|-1
-ARCAIQMTQPPSSLFASVGDSVTITCRASQSV--------TNHWYQQKPGKAPK---LL
IYR------V-SSLQMG-VPSRFSGSG--SGTDFTLT------IS-SLQPDDVATYYCQQ
EYTVGVT
>V185RF-AACZ03054006.1-trbv |(3325, 3619)|2.20696252847|(0.784,0.736,0.715)|-1
--VRSQTIHQWPATLVQPVGSPLSLECTVEGTS------NPNLYWYRQAAGRGLQ---LL
FYSVG-I--G-QI-SSE-VPQNLSAS-RPQDRQFILS------SK-KLLLSDSGFYLCAW
S------
>V186RF-AACZ03095321.1-trdv |(4778, 5084)|2.994|(0.998,0.998,0.998)|-1
RGMLCDKVTQSSPDQTVASGSEVVLLCTYDAVY-----SNPDLFWYRIRPDYSFQ---FV
FYGDNSR--S-QA--ADFTQGRFSVKHILTQKAFHLV------IS-PVRTEDSATYYCAF
-------
>V187RF-AACZ03098097.1-ighv |(6348, 6654)|2.97951611711|(0.997,0.997,0.986)|-1
--HSQVQLVQS-GAEVKKLGASVKVSCKASGYTF--T--DYFIHWVQQAPGQGLE---WM
GWINPNS--G-GTNYAQKFQSRVTMTRNTSISTAYME------LS-RLRSDDTAVYYCAR
-------
>V189RF-AACZ03098100.1-ighv |(12261, 12570)|2.99699200002|(0.999,1.000,0.998)|-1
-VLSQVQLQES-GPGLVKPSETLSLTCAVSGGSI--SSS-NWWSWVRQPPGKGLE---WI
GEIYH-S--G-SPNYNPSLKSRVTISVDKSKNQFSLK------LS-SVTAADTAVYYCAR
-------
>V190RF-AACZ03098100.1-ighv |(19369, 19678)|2.99899600001|(1.000,0.999,1.000)|-1
-AHSQVQLVQS-GAEVKKPGASVKVSCKASGYTF--T--SYAMHWVRQAPGQRLE---WM
GWINTGN--G-NTKYSQKFQGRVTITRDTSASTAYME------LS-SLRSEDTAVYYCAR
-------
>V191RF-AACZ03098103.1-ighv |(623, 937)|2.24887175613|(0.935,0.765,0.766)|-1
-VLSQVTLKES-GPTLVKPTQTLTLTCTFSGFSL--STSGVGVGWIRQPPGKALE---WL
ALIYWD---D-DKRYSPSLKSRLTITKDTSKNQVVLT------MT-NMDPVDTATYYCAH
R------
>V192RF-AACZ03127313.1-iglv |(14865, 15172)|2.99067605248|(1.000,1.000,0.991)|-1
-SWANFMLTQP-HSVSESPGQTVTISCTRSSGSI---AS-DYVQWYQQRPGSAPT---TV
IYE------D-NRRPSG-VPDRFSGSIDSSSNSASLT------IS-GLKTEDEADYYCQS
YDSS---
>V194RF-AACZ03127321.1-iglv |(54420, 54720)|2.98782001102|(0.999,0.993,0.996)|-1
-SLSQLVLTQS-PSASASLGASVKLTCTLSSGH-----SSYAIAWHQQQPEKGPR---YL
MKLNSDG--S-HSKGDG-IPDRFSGSSSG--AERYLT------IS-SLQSEDEADYYCQT
W------
>V195RF-AACZ03127321.1-iglv |(122715, 123024)|2.9898400105|(0.998,1.000,0.992)|-1
-VDSQTVVTQE-PPFSVSPGGTVTLTCGLSSGSV---STSYYPSWYQQTPGQAPR---TL
IYS------T-NTRSSG-VPGRFFGSI--IGNKAALT------IT-GAQADDESDYYCLL
YMGSGI-
>V196RF-AACZ03151873.1-igkv |(7769, 8069)|2.99899200002|(0.999,1.000,1.000)|-1
-ARCDIQMTQSPSSLSASVGDRVTITCRASQGI------NNNLNWYQQKPGKTPK---LL
IYA------A-SSLQSG-IPSRFCDSG--SGTDYTLT------IS-SLQPEDFATYYCQQ
SDGTP--
>V197RF-AACZ03151911.1-igkv |(7475, 7775)|2.97506187285|(1.000,0.999,0.978)|-1
-ARCDIQMTQSTSSLSASVGDRVTITCRASQGI------SNNLNWYQQKPGKTPK---LL
IYA------A-SSLQSG-ILSRFSDSG--SGTDYTLT------IS-SLQPEDFAAYYCQQ
SDSTP--
>V198RF-AACZ03171059.1-trav |(889, 1176)|2.25070503159|(0.918,0.644,0.953)|-1
--VRSQQPVQSPQAMILREGEDAVVNCSSSK-A------LYSVHWYRQKHGEAPI---FL
MILLKGG--E-Q-----KGHDKISASFNEKKQQSSLY------LM-ASQLSYSGTYFCGA
E------
>V199RF-AACZ03171126.1-ighv |(3284, 3590)|2.60199719968|(0.962,0.878,0.844)|-1
-VLSQVQLQQW-GTELLKPSETLSLTCAVYGGSF----SGYYWSWIRQPPGKGLE---WI
GEINH-S--G-STNYNPSLKSRVTISVDTSKNQFSLK------LS-SVTAADTAVYYCAR
-------
>V200RF-AACZ03171149.1-trav |(1638, 1925)|2.99294800078|(0.998,1.000,0.995)|-1
-VSSEDKVVQSPLSLVVHEGDTVTLNCSYEVTN------FQSLLWYKQEK-KAPT---FL
FMLTSSG--I-EK-----KSGRLSSILDKKELF-SIL------NT-ATQTGDSAIYLCAV
E------
>V201RF-AACZ03171512.1-trav |(590, 893)|2.99899600001|(1.000,0.999,1.000)|-1
-PGIAQKITQTQPGMFVQEKEAVTLDCTYDTSD-----PSYGLFWYKQPSSGEMI---FL
IYQGSYD--Q-Q----NATEGRYSLNFQKARKSANLV------IS-ASQLGDSAMYFCAV
RE-----
>V202RF-AACZ03171676.1-trav |(1205, 1504)|2.24986913738|(0.982,0.949,0.661)|-1
--VNGQQVMQIPQYQHVQEGEDFTTYCNSST-T------LSNIQWYKQRPGGHPV---FL
IQLVKSG--E-V-----KKQKRLTFQFGEAKKNSSLH------IT-ATQTTDVGTYFCAG
HSAPQ--
>V203RF-AACZ03172648.1-ighv |(10152, 10459)|3.0|(1.000,1.000,1.000)|-1
-AQCEVQLVES-GGGLVQPGGSLRLSCAASGFTF--S--NHYTSWVLQAPGKGLE---WV
SYISG--DSG-YTNYADSVKGRFTISRDNAKNSLYLQ------MN-SLRAEDTAVYYCV-
-------
>V204RF-AACZ03172650.1-ighv |(24637, 24943)|3.0|(1.000,1.000,1.000)|-1
-VQCEVQLVQS-GGGLVQPGGSLRLSCAGSGFTF--S--SYAMHWVRQAPGKGLE---WV
SAIGTG---G-GTYYADSVKGRFTISRDNAKNSLYLQ------MN-SLRAEDMAVYYCAR
-------
>V205RF-AACZ03173117.1-ighv |(1009, 1323)|2.306836289|(0.933,0.693,0.893)|-1
-VLSQVTLKES-GPVLVKPTETLTLTCTLSGFSL--STSGMGMSWIRQPPGKALE---WL
AHIFSN---D-KKSYSTSLKNRLIISKDTSKSQVVLT------MT-NMDPVDTATYYCAW
R------
>V206RF-AACZ03177116.1-iglv |(1182, 1492)|2.99498000014|(0.998,1.000,0.997)|-1
-SWAQSALTQP-ASVSGSPGQSITISCTGTSSDV---GGYNAVSWYQQHPGKAPK---LM
IYD------V-NKRPSG-VSNRFSGSK--SGNTASLT------IS-GLQAEDEADYYCSS
YRSGGT-
>V207RF-AACZ03178854.1-igkv |(8334, 8634)|2.99596000066|(1.000,0.997,0.999)|-1
-ARCDIQMTQSPSSLSASVGDRVTITCWASQGI------SNNLNWYQQKPGKTPK---LL
IYA------A-SSLQSG-IPSRFSDSG--SGTDYTLT------IS-SLQPEDFATYYCQQ
SDSTS--
>V208RF-AACZ03179013.1-igkv |(41180, 41480)|3.0|(1.000,1.000,1.000)|-1
-ARCDIQMTQSPSSLSASVGDRVTITCRASQGI------SNNLNWYQQKPGKTPK---LL
IYA------A-SSLQSG-IPSRFSDSG--SGTDYTLT------IS-SLQPEDFATYYCQQ
SDSTP--
>V209RF-AACZ03179105.1-trdv |(5604, 5904)|2.93061052253|(0.995,0.956,0.986)|-1
-SSVAQKVTQAQSSVSMPVRKAVTLNCLYEASWW-----SYYIFWYKQLPSKEMI---FL
IRQGSDE--Q-N-----AKSGRYSVNFKKAAKSVALT------IS-ALQLEDSAKYFCAL
WE-----
>V212RF-AACZ03179105.1-trav |(33413, 33703)|2.34433376522|(0.899,0.673,0.989)|-1
--TIIDAKTTQSTSMDCAEGRAANLPCNHSTIS-----GNEYIHWYRQIHSQGPQ---YI
IHGLKNN--E--------TNEMASLIITEDRKSSTLI------LP-HATLRDTAVYYCIV
RV-----
>V213RF-AACZ03179806.1-igkv |(3188, 3488)|2.99899200002|(0.999,1.000,1.000)|-1
-ARCDIQMTQSPSSLSASVGDRVTITCRASQGI------INNLNWYQQKPGKTPK---LL
IYA------A-SSLQSG-IPSRFSDSG--SGTDYTLT------IS-SLQPEDFATYYCQQ
SDSTP--
>V214RF-AACZ03183442.1-igkv |(591, 891)|2.99598000014|(0.999,0.997,1.000)|-1
-ARCDIQMTQSPSSMSASVGDRVTITCRASQGI------NNNLNWYQQKPGKTPK---LL
IYA------A-SSLQSG-IPSRFCDSG--SGTDYTLT------IS-SLQPEDFATYYCQQ
SDGTP--
>V215RF-AACZ03191230.1-iglv |(228, 538)|2.95516889635|(0.987,1.000,0.970)|-1
-SWAQSALTQP-PSVSGSPGQSVTISCTGTSSDV---GGYNYVSWYQQHPGTAPK---LM
IYD------V-SKRPSG-VPDRFSGSK--SGNTASLT------IS-GLQAEDEADYYCCS
YAGSYS-
>V0RF-AJFE01000016.1-trdv |(1583, 1883)|2.29139587219|(0.897,0.706,0.838)|1
-SSVAQKVTQAQSSVSMPVRKAVTLNCLHEASWW-----SYYIFWYKQLPSKEMI---FL
IRQGSDE--L-N-----AKSGRYSVNFKKAAKSVTLT------IS-ALQLEDSAKYFCAL
WE-----
>V1RF-AJFE01003265.1-ighv |(14098, 14407)|3.0|(1.000,1.000,1.000)|1
-VQCEVQLVES-GGGLVQPGGSLRLSCAASGFTF--S--SYWMHWVRQAPGKGLV---WV
SRINSD--GS-STSYADSLKGQFTISRDNAKNTLYLQ------MN-SLRAEDMAVYYCTR
-------
>V2RF-AJFE01011107.1-ighv |(15076, 15385)|2.80640906282|(0.997,0.998,0.872)|1
-TYSQVQLVQS-GHEVKQPGASVKVSCKASGYSF--T--TYGMNWVRQAPGQGLE---WM
GWFNTYT--G-NPTYAQGFTGRFVFSMDTSVGTAYLQ------IS-SLKAEDTAMYYCAR
-------
>V3RF-AJFE01011110.1-ighv |(45852, 46161)|3.0|(1.000,1.000,1.000)|1
-VQCEVQLLES-GGGLVQPGGSLRLSCAASGFTF--S--SYWMHWVRQAPGKGLE---WV
SRINS--DGS-STSYADSVKGRFTISRDNAKNTLYLQ------MN-SLRAEDTAVYYCTR
-------
>V4RF-AJFE01011110.1-ighv |(53572, 53887)|3.0|(1.000,1.000,1.000)|1
-VQCEVQLVES-GGGLVQPGGSLRLSCAASGFTF--S--GSAMHWVRQASGKGLE---WV
GRIRSKANSY-ATAYAASVKGRFTISRDDSKNKAYLQ------MN-SLKTEDTAVYYCTT
-------
>V5RF-AJFE01011111.1-ighv |(20882, 21191)|2.66764483193|(0.988,0.968,0.820)|1
-VQSQVQLVQS-GAEVKKPGSSVKVSCKVSGGTF--S--SYAISWVRQAPGQGLE---WM
GVIIPIL--G-TANYAQKFQGRVTITADESTSTAYME------LS-SLRSEDTAVYYCAT
-------
>V6RF-AJFE01011113.1-ighv |(30008, 30314)|3.0|(1.000,1.000,1.000)|1
-VQCEVQLVES-GGGLVQPGGSLRLSCAASGFTF--S--SYAMHWVRQAPGKGLE---WV
SLIYSG---D-STYYADSVKGRFTISRDNSKNTLYLQ------MG-SLRAEDTAVYYCAR
-------
>V7RF-AJFE01011588.1-igkv |(6066, 6365)|2.99798400013|(1.000,1.000,0.998)|1
-ARCDIQVTQSPSSLSASVGDRVTITCRASQGI------SNGLSWYQQKPGQAPT---LL
IYA------A-SSLQSG-IPSRFSGSG--SGTDFTLT------IS-SLQPEDVATYYCLQ
DYTTH--
>V8RF-AJFE01012232.1-igkv |(670, 988)|2.93464593441|(0.999,0.948,0.998)|1
-SSGDIVMTQAPLSLPITPGEPASISCRSSQSLLDSDDGNTYLDWYLQKPGQSPQ---LL
IYT------L-SYRASG-VPDRFSGSG--SGTDFTLK------IS-RVEAEDVGVYYCMQ
HIEFP--
>V9RF-AJFE01012232.1-igkv |(11186, 11479)|3.0|(1.000,1.000,1.000)|1
-ARCDIQMTQSPSSLSASVGDRVTITCRASQSI------SNYLSWYQQKPGKAPK---LL
IYY------A-STLQSG-VPSRFSGSG--SGTDFTLT------IS-SLQPEDFATYYCQH
GYG----
>V10RF-AJFE01012232.1-igkv |(33464, 33764)|2.99593600205|(1.000,0.996,1.000)|1
-ARCDIQLTQSPSSLSASVGDRVTITCRASQGI------SSYLNWYQQKPGKVPK---LL
IYS------A-SNLQSG-VPSRFSGSG--SGTDFTLT------IS-SLQPEDVATYYCQR
TYNAP--
>V11RF-AJFE01012232.1-igkv |(62717, 63017)|2.99698000014|(1.000,0.998,0.999)|1
-ARCDIRMTQSPSSLSASVGDRVTITCQASQDI------SNYLNWYQQKPGKAPK---LL
IYD------A-SNLETG-VPSRFSGSG--SGTDFTFT------IS-SLQPEDIATYYCQQ
YDNLP--
>V12RF-AJFE01012234.1-igkv |(5885, 6200)|2.62541489974|(0.965,0.896,0.842)|1
-SSGDVVMTQSPRSLPVTLGQPASISCRSSQSLVY-SDGNTYLSWIQQRPGQPPR---LL
IYK------V-SNRDSG-VPDRFSGSG--AGTDFTLK------IS-RVEAEDVGVYYCVQ
GIQLP--
>V13RF-AJFE01012234.1-igkv |(16459, 16774)|2.99285201038|(1.000,0.999,0.994)|1
-SSADIVMTQTPLSLSVTPGQPASISCKSSQSLL-HSDGNTYLYWYLQKPGQSPQ---LL
IYR------V-SNRASG-VPDRFSGSG--SGTDFTLK------IS-RVEAEDVGVYYCMQ
GIQLP--
>V14RF-AJFE01012234.1-igkv |(28936, 29251)|2.98197252412|(1.000,0.984,0.999)|1
-SSGDIVMTQSPLSLPVTPGEPASISCRSSQSLLHS-NRYNYLDWYLQKPGQSPQ---LL
IYL------G-SNRASG-VPDRFSGSG--SGTDFTLK------IS-RVEAEDVGVYYCMQ
ALQTP--
>V15RF-AJFE01012235.1-igkv |(6765, 7067)|2.99799600001|(0.999,1.000,0.999)|1
-SSGDIVMTQTPLSSPVTLGQPASISCRSSQSLVH-SDGNTYLSWLQQRPGQPPR---LL
IYK------V-SNRFSG-VPDRFSGSG--AGTDFTLK------IS-RVEAEDVGVYYCTQ
A------
>V16RF-AJFE01012235.1-igkv |(23412, 23710)|2.44371239815|(0.995,0.718,0.995)|1
-SRGEIVLTQSPDFQSVPPKEKVTITCRASQS------IGSSLHWYQQKPGQSPK---LL
IKY------A-SQSISG-VPSRFSGSG--SGTDFTLT------IN-SLEAEDAATYYCQQ
SSSL---
>V17RF-AJFE01012236.1-igkv |(7268, 7564)|2.97506187285|(1.000,0.978,0.999)|1
-TTGEIVLMQSSATLSLSPGERATLSCRASQSV-----SSSYLAWYQQKPGQAPR---LL
IYD------A-STRATG-IPDRFSGSG--SGTDFTLT------IS-RLEPEDFAVYYCQQ
YGS----
>V18RF-AJFE01012238.1-igkv |(1220, 1535)|2.53818451818|(0.974,0.773,0.944)|1
-SSGDIVMTQNPPSLPVNPGEPASISCRSSQSLLHS-NGYTYLHWYLQKPGQSPQ---LL
IYR------V-SNRFSG-IPDRFSGSG--SGSDFTLK------IS-WVEAEDVGVYYCMQ
ATQFP--
>V20RF-AJFE01012238.1-igkv |(29982, 30282)|2.99899600001|(1.000,0.999,1.000)|1
-ARCDIQMTQSPSSLSASVGDRVTITCRASQGI------SNYLAWFQQKPGKVPK---RL
IYA------A-SSLQSG-VPSRFSGSG--SGTEFTLT------IS-SLQPEDFATYYCLQ
HNSYP--
>V21RF-AJFE01012238.1-igkv |(62062, 62362)|2.65716620566|(0.947,1.000,0.802)|1
-TTGEIVLTQSPATLSLSPGERATLSCRASQSV------SSYLAWYQQKPGQAPR---LL
IYG------A-SNRATG-IPARFSGSG--SRTDFTLT------IS-SVEPEDFAVYYCQQ
YNNQP--
>V22RF-AJFE01012245.1-igkv |(2610, 2910)|3.0|(1.000,1.000,1.000)|1
-ARCAIQLTQSPSSLSASVGDRVTITCRASQGI------SNRLNWYQQKPGKAPK---LL
IYD------A-SSLESG-VPSRFSGSG--SGTDFTLT------IS-SLQPEDFATYYCQQ
FNSYP--
>V23RF-AJFE01012249.1-igkv |(2485, 2785)|2.99698000014|(1.000,0.998,0.999)|1
-TTREIVLTQSPATLSLSPGEKATLSCRASQSV------SSYLAWYQQKPGQAPR---LL
IYD------A-SNRATG-IPARFSGSG--SGTDFTLT------IS-SLEPEDFAVYYCQQ
RSNWH--
>V24RF-AJFE01016082.1-igkv |(1156, 1468)|2.32342466308|(0.790,0.998,0.716)|1
-CNGDIVLTQSPASLAVSPGQRATITCRASESVSF-LG-INLIHWYQQKPGQPPK---LL
IYQ------A-SNKDTG-VPAGFSSSG--SGTDFTLT------IN-PVEANDTANYYCLQ
SKNFP--
>V25RF-AJFE01024273.1-trdv |(100475, 100781)|2.994|(0.998,0.998,0.998)|1
RGMLCDKVTQSSPDQTVASGSEVVLLCTYDAVY-----SNPDLFWYRIRPDYSFQ---FV
FYGDNSR--S-QA--ADFTQGRFSVKHILTQKAFHLV------IS-PVRTEDSATYYCAF
-------
>V27RF-AJFE01038664.1-trgv |(28742, 29055)|2.95184543622|(1.000,0.984,0.972)|1
-SQKSSNLEGRTKSVTRETRSSAEITCDLTVTN------TFYIHWYLHQEGKAPQ---RL
LYYDVST--ARDVLESGLSPGKYYTHT-PRRWSWILR------LQ-NLIENDSGVYYCAT
WD-----
>V28RF-AJFE01038665.1-trgv |(1085, 1398)|2.98696000066|(0.997,0.996,0.994)|1
-SQKSSNLEGRTKSVIRQTGSSAEITCDLDGGS------TGYIHWYLHQEGKAPQ---RL
LYYDSYT--SRVVLESGISPGKYDTYGST-RKNLRLI------LR-NLIENDSGVYYCAT
WD-----
>V29RF-AJFE01038666.1-trgv |(1901, 2214)|2.96226365316|(0.998,0.995,0.972)|1
-SQKSSNLEGRMKSVTRPTGSSAEITCDLTVIN------AVYIHWYLHQEGKSPQ---RL
LYYDVSN--SRDVLESGLSPGKYYTHT-PRRWSWILR------LQ-NLIENDSGVYYCAT
WD-----
>V32RF-AJFE01039607.1-trbv |(117721, 118021)|2.92629798149|(0.993,0.999,0.944)|1
--LTEPEVTQTPSHQVTQMGQEVILRCVPIS-N------HLYFYWYRQILGQKVE---FL
VSFYN-N--E-ISEKSEIFDDQFSVE-RPDGSNFTLK------IW-STKLEDSAMYFCAS
SE-----
>V33RF-AJFE01039607.1-trbv |(129949, 130246)|2.99299600001|(0.998,0.998,0.997)|1
--PIDTEVTQTPKHLVMGMTNKKSLKCEQHM-G------HRAMYWYKQKAKKPPE---LM
FVYSY-E--K-LSIN-ESVPSRFSPE-CPNSSLLNLH------LH-ALQPEDSALYLCAS
SQ-----
>V34RF-AJFE01039607.1-trbv |(137829, 138125)|2.99294800078|(0.998,0.995,1.000)|1
--PVEAGVTQTPRYLIKARGQQVTLSCSPIS-G------HRSVSWYQQTPGQGLQ---FL
FEYFS-E--T-QRNKGN-FPGRFSGR-QFSNSRSEMN------VS-TLELGDSALYLCAS
SL-----
>V35RF-AJFE01039608.1-trbv |(1218, 1515)|2.99899600001|(1.000,1.000,0.999)|1
--PVNAGVTQTPKFQVLKTGQSMTLQCAQDM-N------HNSMYWYRQDPGMGLR---LI
YYSVG-E--G-TTDKGE-VPDGYNVS-RLNKREFSLR------LE-SAAPSQTSVYFCAS
SE-----
>V36RF-AJFE01039609.1-trbv |(5245, 5558)|2.93008808336|(1.000,1.000,0.943)|1
--PMEMGVTQTPRHLVMGMTNKKSLKCEQHL-G------HNAMYWYKQSAKKPLE---LM
FVYNF-K--E-QTEN-NSVPSRFSPE-CPNSSHLFLH------LH-ALQPEDSALYLCAS
SQDTALQ
>V37RF-AJFE01045032.1-ighv |(257, 569)|2.54477500585|(0.999,0.959,0.775)|1
-VLSQVQLQQW-GPGLVKPSETLSLTCAVYGGSI--SSSGYYWSWIRQPPGKGLE---WI
GEINH-S--G-STNYNPSLKSRVTISVDTSKNQFSLK------LS-SVTAADTAVYYCAR
-------
>V38RF-AJFE01045035.1-ighv |(280, 602)|2.20297612256|(0.774,0.650,0.913)|1
-VLSQVTLKES-GPVLVKPTETLTLTCTISGFSL--SNAGMGVSWIRQPPGKALE---WL
AHIFWN---D-EKSYSTSLKSRLTISKDTSKSQVVLT------MT-NMDPVDTATYYCTR
RAQ----
>V39RF-AJFE01045037.1-ighv |(4711, 5020)|2.95229565252|(0.994,0.968,0.993)|1
-THAQVQLVQS-GAEVKKPGATVKISCKASGYTL--T--ELSMHWVRQAPGKGLE---WM
GGFDPED--G-ETIYAQKFQGRVTMTEDTSTDTAYME------LS-SLRSEDTAVYYCAT
-------
>V40RF-AJFE01045037.1-ighv |(12790, 13099)|2.99899600001|(1.000,0.999,1.000)|1
-VQCEVQLVES-GGGLVKPGGSLRLSCAASGFTF--S--NYYMHWVRQAPEKGLE---WV
STIS-G-SGG-STWYPDSVKGRFTISRDNSKNTLYLQ------MN-SLRAEDTAVYYCAR
-------
>V41RF-AJFE01045037.1-ighv |(23646, 23958)|2.99696400065|(1.000,1.000,0.997)|1
-VQCEVQLVES-GGGLVKPGGSLRLSCAASGFTF--S--SYSMNWVRQAPGKGLE---WV
AYISSPS-GS-STYYADSVKGRFTISRDNSKNTLYLQ------MN-SLRAEDTAVYYCAR
-------
>V42RF-AJFE01045041.1-ighv |(1266, 1575)|3.0|(1.000,1.000,1.000)|1
-VQCEVQLVES-GGALVKPGGSLRLSCAASGFTF--S--SYGMHWVRQAPGKGLE---WV
SYISYDS--S-YIYYADSVKGRFTISRDNAKNSLYLQ------MN-SLRAEDTAVYYCAR
-------
>V43RF-AJFE01045048.1-ighv |(1386, 1695)|3.0|(1.000,1.000,1.000)|1
-VQCEVQLVES-GGGLVQPGGSLRLSCAASGFTF--D--DYGMSWVRQAPGKGLE---WV
SLISW--DGG-STYYADSVKGRFTISRDNSKNSLYLQ------MN-SLRAEDTALYYCAR
-------
>V44RF-AJFE01045051.1-ighv |(2850, 3156)|2.99596000066|(1.000,0.999,0.997)|1
-VLSQLQLQES-GPGLVKPSETLSLTCTVSGGSI--S--SYYWSWIRQPPGKGLE---WI
GNIYY-S--G-SAYYNPSLKSRVTISVDTSKNQFSLK------LS-SVTAADTAVYYCAR
-------
>V45RF-AJFE01045051.1-ighv |(17267, 17573)|3.0|(1.000,1.000,1.000)|1
-VQCEVQLVES-GGGLVQPGGSLRLSCAASGFTV--S--SYHMSWVRQAPGKGLE---WV
SVIYSGG----STYYADSVKGRFTISRDNSKNTLYLQ------MN-SLRAEDTAVYYCAR
-------
>V46RF-AJFE01045051.1-ighv |(31190, 31497)|2.61199677071|(0.990,0.987,0.787)|1
-VCAEVQLVQS-GAEVKKPGESLKISCKGSGYSF--T--SYWIGWVRQMPGKGLE---WM
GIIYPGD--S-DTRYSPSFQGQVTISADKSISTAYLQ------WS-SLKASDTAMYYCA-
-------
>V47RF-AJFE01045051.1-ighv |(52919, 53234)|3.0|(1.000,1.000,1.000)|1
-VQCEVQLVES-GGGLVQPGRSLRLSCTASGFTF--G--DYAMSWIRQAPGKGLE---WV
GFIRSKAYGG-TTEYAASVKGRFTISRDDSKSIAYLQ------MN-GLKTEDTAVYYCTR
-------
>V49RF-AJFE01045051.1-ighv |(75870, 76179)|2.99899200002|(0.999,1.000,1.000)|1
-AHSQVQLVQS-GAEVKKPGASVKVSCKASGYTF--T--SYTISWLRQAPGQGLE---WM
GVISPSD--G-STSYAQKFQGRVTMTRDTSTSTVYME------LS-SLRSEDTAVYYCAR
-------
>V50RF-AJFE01045051.1-ighv |(79995, 80304)|2.99899600001|(1.000,0.999,1.000)|1
-AYSQMQLVQS-GAEVKKPGSSVKVSCKASGYTF--T--YRYLHWVRQAPGQALE---WM
GWITPYN--G-NTNYAQKFQDRVTITRDRSMSTAYME------LR-SLRSEDSAVYYCAR
-------
>V51RF-AJFE01045053.1-ighv |(1090, 1399)|2.66580713845|(0.914,0.844,0.928)|1
-VQCEVQLVES-GGGLVQPGGSLRLSCAASGFTF--S--NSDTNWVHQAPGKGLE---LV
SGVSW--NGS-RMHYADSVKGRFIISRDNSRNSLYLQ------TN-SLRAEDTAVYYCVR
-------
>V54RF-AJFE01069975.1-trav |(15309, 15599)|3.0|(1.000,1.000,1.000)|1
-MTRGEDVEQSL-FLSVREGDSSVINCTYTDSS------STYLYWYKQEPGAGLQ---LL
TYIFSNM--D-MK-----QDQRLTVLLNKKDKHLSLR------IA-DTQTGDSAIYFCAE
S------
>V55RF-AJFE01069975.1-trav |(34873, 35161)|3.0|(1.000,1.000,1.000)|1
--VKSQKIEQNSEALNIQEGKTATLTCNYTNYS------PAYLQWYRQDPGRGPV---FL
LLIRENE--K-EK-----RKERLKVTFDTTLKQGVFH------IT-ASQPADSATYLCAL
-------
>V56RF-AJFE01069975.1-trav |(49199, 49486)|2.98894800078|(0.998,0.996,0.995)|1
-ANGENQVEHSPHFLGPQQGDVASMSCTYSVSR------FNNLQWYRQNTGMGPK---HL
LSMYSAG--Y-EK-----QKGRLNAILL--KNGSSLY------IT-AVQPEDSATYFCAV
D------
>V58RF-AJFE01069975.1-trav |(77622, 77916)|2.99798400013|(1.000,0.998,1.000)|1
-GINGDSVVQTEGQVLLSEGDSLIVNCSYETTQ------YPSLLWYVLYPGEGPQ---LL
LKAMKAN--D--N--G--RNKGFEATYRKETTSFHLE------KD-SVQESDSAVYFCAL
S------
>V59RF-AJFE01069975.1-trav |(91696, 91989)|2.99796800026|(0.998,1.000,1.000)|1
-GSGKNQVEQSPQSLIILEGKNCTLQCNYTVSP------FNNLRWYKQDTGRGPV---SL
TIMTFSE--N-T-----KSNGRYTATLDADTKKSSLH------IT-ASQLSDSASYICVV
S------
>V60RF-AJFE01069975.1-trav |(107426, 107714)|3.0|(1.000,1.000,1.000)|1
VWSQRKEVEQDPGPFNVPEGATVAFNCTYSNSA------SQSFFWYRQDCRKEPK---LL
MSVYSSG--N-E-------DGRFTAQLNRASQYISLL------IR-DSKLSDSATYLCAV
-------
>V61RF-AJFE01069975.1-trav |(118638, 118935)|2.99389600501|(1.000,0.995,0.999)|1
-TVRAQSVTQPDIHITVSEGASLELRCNYSYGA------TPSLFWYVQSPGQGLQ---LL
LKYFSGD--T-LV--Q--GIKGFEAEFKRSQSSFNLR------KP-SVHWSDAAEYFCAV
G------
>V62RF-AJFE01069975.1-trav |(134910, 135200)|2.99392000218|(1.000,0.998,0.996)|1
--VNGENVEQHPSTLSVQEGDGAVIKCTYSDSA------SNYFPWYKQELGKGPQ---LI
IDIRSNM--G-EK-----KDQRIAVTLNKTAKHFSLH------IT-ETQPEDSAVYFCAA
S------
>V63RF-AJFE01069975.1-trav |(154372, 154663)|2.99699200002|(0.999,1.000,0.998)|1
VWSQQKEVEQNSGPLSVPEGAIASLNCTYSDRR------SQSFFWYRQYSGKSPE---LI
MSIYSNG--D-E------EDGRFTAQLNKASQYVSLL------IR-DSQPSDSATYLCAV
-------
>V64RF-AJFE01069975.1-trav |(160863, 161160)|3.0|(1.000,1.000,1.000)|1
-GTRAQSATQLDSHVSVSEGALVLLRCNYSSSV------PPYLFWYVQYPNQGLQ---LL
LKYTTGA--T-LV--K--GINGFEAEFKKSETSFHLT------KP-SAHVNDAAEYFCAV
S------
>V65RF-AJFE01069976.1-trav |(18238, 18531)|2.99593600205|(1.000,0.996,1.000)|1
-VSRGESVGLHLPTLSVQEGDNSIINCAYSNSA------SDYFIWYKQESGKGPQ---FI
IDIRSNM--D-KR-----QGQRVTVLLNKTVKHLSLQ------IA-ATQPGDSAVYFCAE
N------
>V66RF-AJFE01069976.1-trav |(24122, 24425)|2.99899600001|(1.000,0.999,1.000)|1
-PGIAQKITQTQPGMFVQEKEAVTLDCTYDTSD-----PSYGLFWYKQPSSGEMI---FL
IYQGSYD--Q-Q----NATEGRYSLNFQKARKSANLV------IS-ASQLGDSAMYFCAV
RE-----
>V67RF-AJFE01069976.1-trav |(40935, 41229)|3.0|(1.000,1.000,1.000)|1
-RTRGDSVTQMEGPVTLSEEAFLTINCTYTATG------YPSLFWYVQYPGEGLQ---LL
LKATKAD--D--K--G--SNKGFEATYRKETTSFHLE------KD-SVQASDSAVYFCAL
S------
>V68RF-AJFE01069976.1-trav |(65330, 65623)|2.99594800078|(0.997,1.000,0.999)|1
VWSQQKEVEQDPGPLSVPEGAIASLNCTYSNSA------FQYFMWYRQYSRKGPE---LL
MYTYSSG--N-K------EDGRFIAQVDTSSKYISLF------IR-DSQPSDSATYLCAM
S------
>V70RF-AJFE01069976.1-trav |(97788, 98075)|2.99899200002|(0.999,1.000,1.000)|1
--VNSQQGEEDPQALSIQEGENAIMNCSYKTS-------INNLQWYRQNSGRGLV---HL
ILIRSNE--R-EK-----HSGRLRVTLDTSKKSSSLL------IT-ASRAADTASYFCAT
D------
>V71RF-AJFE01069976.1-trdv |(107857, 108160)|3.0|(1.000,1.000,1.000)|1
-SSMAQKVTQAQTEISVVEKEDVTLDCVYETRD-----TTYYLFWYKQPPSGELV---FL
IRRNSFD--E-Q----NEISGRYSWNFQKSTSSFNFT------IT-ASQVVDSAVYFCAL
SE-----
>V72RF-AJFE01069977.1-trav |(1078, 1365)|2.99899600001|(1.000,1.000,0.999)|1
-LSGEDQVTQSPEALRLQEGESSSLNCSYTVSG------LRGLFWYRQDPGKGPE---FL
FTLYSAG--E-EK-----EKERLKATLTKK--ESFLH------IT-APKPEDSATYLCAV
Q------
>V73RF-AJFE01069977.1-trav |(12990, 13289)|2.41332097845|(0.897,0.702,0.988)|1
-VSSKQEVTQIPAALSVPEGDNLVLNCSFTDSA------IYSLQWFRQDPGKGLT---SL
LLIQSSQ--R-EQ-----TSGRLNASLDKSSGRSTLY------IA-ASQPGDSATYLCAV
RHS----
>V75RF-AJFE01069977.1-trdv |(56532, 56832)|2.29139587219|(0.897,0.706,0.838)|1
-SSVAQKVTQAQSSVSMPVRKAVTLNCLHEASWW-----SYYIFWYKQLPSKEMI---FL
IRQGSDE--L-N-----AKSGRYSVNFKKAAKSVTLT------IS-ALQLEDSAKYFCAL
WE-----
>V77RF-AJFE01104359.1-trbv |(3464, 3764)|2.41379134264|(0.901,0.794,0.802)|1
--SMDTKVTQRPRLLVKANEQKAKTDCVPIK-R------HSYVYWYHKTLEEELK---FL
IYFQN-E--E-IIQKAEIINERFSAQ-CPQNSPCTLE------IQ-STESGDTAWYFCAN
SK-----
>V79RF-AJFE01104359.1-trbv |(36551, 36842)|2.99389600501|(1.000,0.995,0.999)|1
--LMEAEIYQTPRHRVIGTGKKITLECSQTM-G------HDKMYWSRSRNGITPH---PP
FL--W-V--N-STEKGD-LSSESTVS-RIRIERFPLT------LE-SASPSHTSQYLCAS
SE-----
>V80RF-AJFE01104369.1-trbv |(8636, 8939)|2.99699200002|(0.999,0.998,1.000)|1
-SVFSAVISQKPSRDICQRGTSMTIQCQVDSQV-------TMMFWYCQQPGQSMT---LI
ATANQGS--E-ATYESRFVIDKFPIS-RPNLTFSTLT------VS-NRRPEDSSIYLCSV
E------
>V81RF-AJFE01000028.1-igkv |(103568, 103886)|2.29380667749|(0.987,0.659,0.998)|-1
-SSGDIVMTQTPLSLPVTPGEPASISCRSSESLLDTDDEYTYLNWYLQKPGQSPQ---LL
IYE------V-SNRASG-VPDRFSGSG--SGTDFTLK------IS-RVEAEDVGVYYCMQ
ALQTP--
>V82RF-AJFE01002289.1-igkv |(593, 893)|2.99696400065|(1.000,0.997,1.000)|-1
-ARCDIQMTQSPSSLSASVGDRVTITCRASQGI------RNDLGWYQQKPGKAPK---LL
IYA------A-SSLQSG-VPSRFSGSG--SGTDFTLT------IS-SLQPEDFATYYCLQ
DYNYP--
>V83RF-AJFE01002352.1-igkv |(655, 955)|2.99698000014|(1.000,0.999,0.998)|-1
-ARCAIRMTQSPSSLSASTGDRVTITCRASQGI------SSYLAWYQQKPGKAPK---LL
IYA------A-STLQSG-VPSRFSGSG--SGTEFTLT------IS-CLQSEDFATYYCQQ
YYSYP--
>V84RF-AJFE01003455.1-igkv |(8866, 9184)|2.85751751797|(0.999,0.910,0.981)|-1
-TSGDIVMTQTPLSLPVTPGEPASISCRSSQSLLDSDDGNAYLDWYLQKPGQSPQ---LL
IYE------V-SNWASG-VPDRFSGSG--SGTDFTLK------IS-RVEAEDVGVYYCMQ
ALQTP--
>V85RF-AJFE01010527.1-trdv |(4455, 4755)|2.29139587219|(0.897,0.706,0.838)|-1
-SSVAQKVTQAQSSVSMPVRKAVTLNCLHEASWW-----SYYIFWYKQLPSKEMI---FL
IRQGSDE--L-N-----AKSGRYSVNFKKAAKSVTLT------IS-ALQLEDSAKYFCAL
WE-----
>V86RF-AJFE01010527.1-trav |(11555, 11845)|2.9338222392|(0.985,0.962,0.989)|-1
-VSSILNVEQSPQSLHVQEGDSTNFTCSFPSSN------FYALHWYRWETAKSPE---AL
FVMTLNG--D-EK-----KTGRISATLNTKEGYSYLY------IK-GSQPEDSATYLCAF
-------
>V87RF-AJFE01010827.1-iglv |(3125, 3428)|2.9696826523|(0.998,1.000,0.974)|-1
-SVTSYVLTQP-PSVSVAPEQTARITCGGNN--I---GS-KSVHWYQQKPGQAPV---LV
IYD------D-SDRPSG-IPERFSGSK--SGNTATLT------IS-RVEAGDEADYYCQV
WDSSSKH
>V88RF-AJFE01010827.1-iglv |(11046, 11349)|3.0|(1.000,1.000,1.000)|-1
-SVVSSELTQD-PAVSVALGQTVRITCQGDSL------RSYYASWYQQKPGQAPV---LV
IYG------N-NNRPSG-IPDRFSGSS--SGNTASLT------IT-GAQAEDEADYYCSS
LDSSGNH
>V89RF-AJFE01010827.1-iglv |(27044, 27354)|2.96953206285|(0.991,0.982,0.997)|-1
-SWAQSALTQP-PSVSGSPGQSVTISCTGTSSDV---GSYNRVSWDQQPPGKAPK---LM
IYE------V-SKRPSG-VPDRFSGSK--SGNTASLT------IS-GLQAEDEADYYCSS
YTSSST-
>V90RF-AJFE01010828.1-iglv |(147, 450)|2.99296000066|(0.997,1.000,0.996)|-1
-SVTSYVLTQP-PSVSVAPGQTARITCGGNN--I---GS-KSVHWYQQKPGQAPV---LV
VYD------D-SDQPSG-IPERFSGSK--SGNTATLT------IS-RVEAGDEADYYCQV
WDSSSDH
>V91RF-AJFE01010829.1-iglv |(16809, 17106)|2.99696400065|(1.000,0.997,1.000)|-1
-SVASYELTQP-SSVSVSPGQTARITCSGDV--L---AK-NYARWFQQKPGQAPV---LV
IYK------D-SERPSG-IPERFSGSS--SGTTVTLT------IS-GAQVEDEADYYCYS
AADNN--
>V93RF-AJFE01010857.1-ighv |(227, 534)|2.73381848264|(0.957,0.979,0.847)|-1
-AHSQVQLVQS-GAEVKKPGASVKISCKASGYTF--T--SYGISWVRQAPGQGLE---WM
GWIDAYY--G-NTNYAEKLQGRVTMTTDTSRRTAYME------LR-RLRSDHTAVYYCA-
-------
>V94RF-AJFE01017581.1-iglv |(4261, 4557)|2.99899600001|(1.000,0.999,1.000)|-1
-SVASYELTQP-PSVSVSPGQTASITCSGDK--L---GD-KYAYWYQQKSGQSPV---LV
IYQ------D-SKRPSG-IPERFSGSN--SGNTATLT------IS-GTQAMDEADYYCQA
WDSST--
>V96RF-AJFE01017584.1-iglv |(3557, 3860)|3.0|(1.000,1.000,1.000)|-1
-SEASYELTQP-PSVSVSPGQTARITCSGDA--L---PK-QYAYWYQQKSGQAPV---LI
IYE------D-SKRPSG-IPERFSGSS--SGTMATLT------IS-GAQVEDEADYYCYS
TDSSGNH
>V97RF-AJFE01017584.1-iglv |(14566, 14876)|2.90346854|(1.000,0.971,0.947)|-1
-SWAQSALTQP-PSASRSPGQSVTISCTGTSSDI---GGYNYVSWYQQHPGKAPK---LM
IYE------V-SKRPSG-VPDRFSGSK--SGNTASLT------VS-GLQAEDEADYYCSS
YAGSNN-
>V98RF-AJFE01017586.1-iglv |(12261, 12571)|2.95516889635|(0.987,1.000,0.970)|-1
-SWAQSALTQP-PSVSGSPGQSVTISCTGTSSDV---GGYNYVSWYQQHPGTAPK---LM
IYD------V-SKRPSG-VPDRFSGSK--SGNTASLT------IS-GLQAEDEADYYCCS
YAGSYS-
>V100RF-AJFE01020628.1-iglv |(6538, 6850)|2.99899600001|(1.000,0.999,1.000)|-1
-SWAQSVLTQP-PSVSGAPGQRVTISCTGSSSNI---GAGYDVHWYQQLPGTAPK---LL
IYE------N-NKRPSG-VPDRFSGSK--SGTSASLA------IT-GLQAEDEADYYCQS
YDSSLSG
>V101RF-AJFE01020628.1-iglv |(24239, 24549)|2.37996588028|(0.819,0.719,0.982)|-1
-SLSQPVLTQP-PSFSASPGESARLTCTLPSDIN---VGSYNIYWYQQKPGSPPR---YL
LYYYSDS--D-KGQGSG-VPSRFSGSKDASANTGILV------IS-GLQSEDAADYYCMI
-------
>V102RF-AJFE01020631.1-iglv |(2749, 3058)|2.99699200002|(0.999,1.000,0.998)|-1
-SWAQSVLTQP-PSVSGTPGQRVTISCSGSSSNI---G-SNTVNWYQQLPGTAPK---LL
IYS------N-NQRPSG-VPDRFSGSK--SGTSASLA------VS-GLRSEDEADYYCAA
WDDSLNG
>V104RF-AJFE01020631.1-iglv |(24444, 24762)|2.96190837717|(0.999,0.967,1.000)|-1
-SLSQPVLTQP-TSLSASPGASARLTCTLRSGIN---VGSYYISWYQQKPGSPPR---YL
LNYYSDS--D-KGQGSG-VPSRFSGSKDASTNAGLLL------IS-GLQSEDEADYYCAI
WYS----
>V105RF-AJFE01020632.1-iglv |(18572, 18882)|2.93653720745|(0.996,0.975,0.970)|-1
-SLSQSVVTQP-ASLSASPGASASLTCTLRSGIN---VGTYRISWYQQKPGSPPR---YL
LRYKSDS--D-KQQGSG-VPSRFSGSKDASANAGILV------IS-GLQSEDEADYYCMI
-------
>V106RF-AJFE01020634.1-iglv |(1918, 2227)|2.99593600205|(1.000,1.000,0.996)|-1
-SWAQSVLTQP-PSVSAAPGQKVTISCSGSSSNI---GNN-YVSWYQQLPGTAPK---IL
IYD------N-NKRPSG-ISDRFSGSK--SGTSATLG------IT-GLQTGDEADYYCGT
WDSSLSA
>V109RF-AJFE01022796.1-iglv |(57629, 57936)|2.97554104219|(0.998,0.979,1.000)|-1
-SWANFMLTQP-HSVSESLGQTVTISCPRSSGSI---AS-NYVQWYQQRPGSAPT---TV
IYE------D-NRRPSG-VPDRFSGSIDRSSNSASLT------IS-GLKSEDEADYYCQS
YDSS---
>V110RF-AJFE01022798.1-iglv |(2606, 2906)|2.98782001102|(0.999,0.993,0.996)|-1
-SLSQLVLTQS-PSASASLGASVKLTCTLSSGH-----SSYAIAWHQQQPEKGPR---YL
MKLNSDG--S-HSKGDG-IPDRFSGSSSG--AERYLT------IS-SLQSEDEADYYCQT
W------
>V111RF-AJFE01022798.1-iglv |(70777, 71086)|2.9898400105|(0.998,1.000,0.992)|-1
-VDSQTVVTQE-PPFSVSPGGTVTLTCGLSSGSV---STSYYPSWYQQTPGQAPR---TL
IYS------T-NTRSSG-VPGRFFGSI--IGNKAALT------IT-GAQADDESDYYCLL
YMGSGI-
>V113RF-AJFE01024276.1-trav |(19317, 19607)|3.0|(1.000,1.000,1.000)|-1
-VSSEDKVVQSPLSLVVHEGDTVTLNCSYEVTN------FQSLLWYKQEK-KAPT---FL
FMLTSSG--I-EK-----KSGRLSSILDKKELFSILN------IT-ATQTGDSAIYLCAV
E------
>V114RF-AJFE01024276.1-trav |(73725, 74027)|3.0|(1.000,1.000,1.000)|-1
-FSMAQTVTQSQPEMSVQEAETVTLSCTYDTSE-----SDYYLFWYKQPPSRQMI---LV
IRQEAYK--Q-Q----NATENRFSVNFQKAAKSFSLK------IS-DSQLGDAAMYFCAY
RS-----
>V115RF-AJFE01024276.1-trav |(95666, 95954)|2.99199600001|(0.997,0.997,0.998)|-1
-LSGELKVEQSPLFLSTQEGKNYTIYCNYSTTS-------DRLYWYRQDPGKSLE---SL
FVLLSNG--A-VK-----QEGQLMASLDTKARLSTLH------IT-AAVHDLSATYFCAV
-------
>V117RF-AJFE01045439.1-ighv |(4672, 4981)|3.0|(1.000,1.000,1.000)|-1
-VQCEVQLVES-GGGLVQPGGSLTLSCAASGFTF--S--SYWMSWVRQAPGKGLE---WV
ANIKKDG--S-EKYYADSVKGRFTISRDNAKNSLYLQ------MN-SLRAEDTAVYYCAT
-------
>V118RF-AJFE01045444.1-ighv |(1979, 2288)|2.99899600001|(1.000,1.000,0.999)|-1
-AHSQVQLVQS-GAEVKKPGASVKVSCKASGYTF--T--SYDINWVRQATGQGLE---WM
GWMNPNS--G-NTGYAQKFQGRVTMTRDTSISTAYME------LS-SLRSEDTAVYYCAR
-------
>V119RF-AJFE01045447.1-ighv |(71, 380)|2.99899600001|(1.000,1.000,0.999)|-1
-VQCEVQLVES-GGGVVQPGRSLRLSCAASGFTF--S--NYAMHWVRQAPGKGLE---WV
SVISSS--GS-YIYYADSVKGRFTISRDNAKNSLYLQ------MN-SLRAEDTALYYCAK
-------
>V120RF-AJFE01045453.1-ighv |(639, 948)|2.99899600001|(1.000,1.000,0.999)|-1
-VQCQVQLVES-GGGLVKPGGSLRLSCAASGFTF--S--NHYMSWIRQAPGKGLE---WV
SYISYDS--S-YINYADSVKGRFTISRDNAKNSLYLQ------MN-SLRAEDTAVYYCAR
-------
>V121RF-AJFE01047586.1-igkv |(1119, 1419)|3.0|(1.000,1.000,1.000)|-1
-TRCDIQMTQSPSSLSASVGDRVTITCRASQGI------SNYLAWYQQKPGKAPK---LL
IYY------A-SRLESG-VPSRFSGSG--SGTDYTLT------IS-SLQPEDFATYYCQQ
YNSNP--
>V122RF-AJFE01070459.1-trbv |(7045, 7343)|2.51754920221|(0.992,0.992,0.747)|-1
--SMDADVTQTPRNRITKTGKRIMLECSQTK-G------HDRMYWYRQDPGLGLR---LI
YYSFD-V--K-DINKGE-ISDGYSVS-RQAQAKFSLS------LE-SAIPNQTALYFCAT
SD-----
>V123RF-AJFE01070459.1-trbv |(21089, 21386)|2.99899600001|(1.000,0.999,1.000)|-1
--LMEADIYQTPRYLVIGTGKKITLECSQTM-G------HDKMYWYQQDPGMELH---LI
HYSYG-V--N-STEKGD-LSSESTVS-RIRTEHFPLT------LE-SARPSHTSQYLCAS
SE-----
>V125RF-AJFE01070459.1-trbv |(70897, 71194)|2.99698000014|(1.000,0.999,0.998)|-1
--LVDVKVTQSSRYLVKRMGEKVFLECVQDM-D------HENMFWYRQDPGLGLR---LI
YFSSD-V--K-MKEKGD-IPEGYSVS-REKKERFSLI------LE-SASTNQTSMYLCAS
SI-----
>V126RF-AJFE01070459.1-trbv |(89682, 89985)|2.90740376074|(0.991,0.937,0.991)|-1
-SVFSAVISQKPSRDICQRGTSLTIQCQVDS-Q------VTMMFWYRQQPGQSPT---LI
ATANQGS--E-ATYETGFVIDKFPIS-RPNLTFSTLT------VS-NMSPEDSSIYLCSV
E------
>V127RF-AJFE01070460.1-trbv |(14989, 15285)|2.30495800815|(0.966,0.668,0.970)|-1
--LSNAGVMQNPRHLVRRRGQEARLRCSPVK-G------HNHVYWYRQLPEEGLK---FM
VYLQK-E--N-IIDESGMPKERFSAE-FPKEGPSILR------IQ-QAVRGDSAAYFCAS
S------
>V128RF-AJFE01070460.1-trbv |(18108, 18405)|3.0|(1.000,1.000,1.000)|-1
--TVDGGITQSPKYLFRKEGQNVTLNCEQNL-N------HDAMYWYRQDPGQGLR---LI
YYSQI-V--N-DFQKGD-IAEGYSVS-REKKESFPLT------VT-SAQKNPTAFYLCAS
SI-----
>V129RF-AJFE01070460.1-trbv |(35929, 36229)|2.28257073671|(0.925,0.736,0.808)|-1
--STDTKVTQRPRLLVKASEQKAKMDCVPIK-G------HSYVYWYRKKLEEELE---FL
VYFQN-E--E-LIQKAEIINERFLAQ-CPKNSSCTLE------IQ-STESGDTALYFCAS
SK-----
>V130RF-AJFE01070460.1-trbv |(44986, 45286)|2.98989600501|(0.998,0.999,0.993)|-1
--SFHAKVTQTPGHLVKGKGQKTKMDCTPEK-G------HVFVYWYQQNQNKEFM---LL
ISFQN-E--Q-VLQETEMHKTRFSSQ-CPKNTPCSLA------IL-SSEPGDTALYLCAS
SQ-----
>V131RF-AJFE01070461.1-trbv |(12301, 12601)|2.36555753229|(0.880,0.954,0.689)|-1
--LIDAGVTQTPRHKVTEMGQEVTMRCQPIL-G------HNTVFWYRQTMMQGLE---LL
AYFRN-R--A-PLDDSGMPKDRFSAE-MLDATLATLK------IQ-PSEPRDSAVYFCAS
GL-----
>V132RF-AJFE01070461.1-trbv |(19125, 19425)|2.96050267138|(0.998,0.991,0.974)|-1
--HKEAGVTQFPSHSVIEKGQTVTLRCDPIS-G------HDNLYWYRRVMGKEIK---FL
LHFVR-E--S-KQDESGMPNNRFLAE-RTGGTYSTLK------VQ-PAELEDSGVYFCAS
SQ-----
>V133RF-AJFE01070461.1-trbv |(29248, 29548)|2.99698000014|(0.998,0.999,1.000)|-1
--SPGEEVTQTPKHLVRGEGQKAKLYCAPIK-G------HSYVFWYQQVLKKEFK---FL
ISFQN-E--N-VFDKTGMPKERFSAK-CLSNSPCSLE------IQ-ATKLEDSAVYFCAS
SQ-----
>V134RF-AJFE01070462.1-trbv |(12014, 12314)|2.45325717519|(0.957,0.714,1.000)|-1
--LIEAGVVQSPRYKIIEKKQPVAFWCNPIS-G------HNTLYWYWQNLGQGPE---LL
IRYEN-E--E-AVDDSQLPKDRFSAE-RLKGVDSTLK------IQ-PAELGDSAVYLCAS
SL-----
>V135RF-AJFE01070462.1-trbv |(17609, 17909)|3.0|(1.000,1.000,1.000)|-1
--HTDAGVIQSPRHEVTEMGQEVTLRCKPIS-G------HNSLFWYRQTMMQGLE---LL
IYFNN-N--V-PIDDSGMPKDRFSAK-MPNASFSTLK------IQ-PSEPRDSAVYFCAS
SL-----
>V136RF-AJFE01070463.1-trbv |(1165, 1465)|2.98450011724|(0.998,1.000,0.987)|-1
--HTGAGVSQTPSNKVTEKGKDVELRCDPIS-G------HAALYWYRQSLGQGPE---FL
IYFRG-T--G-AADDSGLPNDRFFAV-RPEGSVSTLK------IQ-RTEQGDSAVYLCAS
SL-----
>V139RF-AJFE01070463.1-trbv |(24431, 24731)|2.99296000066|(0.999,0.996,0.998)|-1
--LSEAEVAQSPRYKITEKSQAVAFWCDPIS-G------HATLYWYRQILGQGPE---LL
VQFQD-E--S-VVDDSQLPKDRFSAE-RLKGVDSTLK------IQ-PAELGDSAMYLCAS
SL-----
>V142RF-AJFE01070463.1-trbv |(67763, 68060)|2.97606587284|(1.000,1.000,0.978)|-1
--PVNGGVTQTPKFQVLKTGQSMTLQCAQDM-N------HDYMYWYRQDPGMGLR---LI
HYSAG-A--G-ITDKGE-VPNGYNVS-RSNTEDFPLS------LV-SAAPSQTSVYFCAS
SY-----
>V143RF-AJFE01070463.1-trbv |(71976, 72276)|2.99899600001|(1.000,0.999,1.000)|-1
--HTGAGVSQSPRYKVAKRGRDVALRCDSIS-G------HVTLYWYRQTLGQGSE---VL
TYFRS-D--A-QRDKSGRPSGRFSAE-RPERSVSTLK------IQ-RTEQGDSAVYLCAS
SL-----
>V144RF-AJFE01070463.1-trbv |(79903, 80199)|2.99293600205|(0.999,0.995,0.999)|-1
--SVETGVTQSPTHLIKTRGQQVTLRCSPQS-G------HNTVSWYQQALGQGPQ---FI
FQYYR-E--E-ENGRGN-FSPRFSGR-QFPNYSSELN------VN-ALELDDSALYLCAS
SL-----
>V145RF-AJFE01070463.1-trbv |(86352, 86648)|2.99696400065|(1.000,0.997,1.000)|-1
----NAGVTQTPKFRILKIGQSMTLQCAQDM-N------HNYMYWYRQDPGMGLK---LI
YYSVG-A--G-ITDKGE-VPNGYNVS-RSTTEDFPLR------LE-SAAPSQTSVYFCAS
SYST---
>V146RF-AJFE01070463.1-trbv |(99363, 99659)|2.99385601037|(1.000,0.994,1.000)|-1
--PVDAGVTQSPTHLIKTRGQHVTLRCSPIS-G------HKSVSWYQQALGQGPQ---FI
FEYYE-K--E-ERGRGN-FPDRFSAR-QFPNYSSELN------VN-ALLLGDSALYLCAS
SL-----
>V148RF-AJFE01070463.1-trbv |(108994, 109294)|2.9958720041|(0.996,1.000,1.000)|-1
--HTGAGVSQSPRYKVTKRGQDVTLRCDPIS-G------HVALYWYQQALGQGPE---FL
TYFNY-E--A-QPDKSGLPNDRFSAE-RPEGSNSTLT------IQ-RTEQRDSAMYLCAS
NL-----
>V149RF-AJFE01070463.1-trbv |(116814, 117110)|2.98985201038|(0.999,0.993,0.998)|-1
--SVDAGVTQSPIHLIKTRGQQVTLRCSPQS-G------HDTVSWYQQVLGQGPQ---CI
FEYYE-E--E-ERQRGN-FPDRFSGH-QFPNYSSELN------VN-ALLLGDSALYLCAS
SL-----
>V150RF-AJFE01070463.1-trbv |(124111, 124405)|2.3677155727|(0.982,0.850,0.769)|-1
--PVNAGVTQTPKFRILKTGQSMTLQCARDM-N------HGYMSWYRQDPGMGLR---LI
YYSAA-A--G-T-TDKE-VPNGYNVS-RLNTEDFPLR------LV-SAAPSQTSVYFCAS
SY-----
>V151RF-AJFE01070463.1-trbv |(128406, 128706)|2.99696400065|(1.000,1.000,0.997)|-1
--HTGAGVSQSPRYKVTKRGQDVTLRCDPIS-S------HATLYWYQQALGQGPE---FL
TYFNY-E--A-QPDKSGLPNDRFSAE-RPEGSISTLT------IQ-RTEQRDSAMYLCAS
SL-----
>V152RF-AJFE01070463.1-trbv |(136837, 137133)|2.99798400013|(1.000,0.998,1.000)|-1
--PVDAGVTQSPTHLIKTRGQHVTLRCSPIS-G------HTSVSWYQQALGQGPQ---FI
FQYYE-K--E-ERGRGN-FPDRFSAR-QFPNYSSELN------VN-ALLLGDSALYLCAS
SL-----
>V153RF-AJFE01070463.1-trbv |(144146, 144443)|2.9958720041|(0.996,1.000,1.000)|-1
--PVNAVVTQTPKFQVLKTGQSMTLQCAQDM-N------HDCMSWYRQDPGMGLR---RI
HYSVA-A--G-ITDKGE-VPDGYNVS-RSNKEDLPLR------LE-SAAPSQTSVYFCAS
SY-----
>V154RF-AJFE01070463.1-trbv |(148806, 149106)|2.99499600001|(0.998,0.998,0.999)|-1
--HTGAGVSQSPKYKVTKRGQDVALRCDPIS-G------HVSLFWYQQALGQGPE---FL
TYFRN-E--A-QLDKSGLPSDRFFAE-RPEGSVSTLK------IQ-RTQQEDSAVYLCAS
SL-----
>V155RF-AJFE01070463.1-trbv |(157011, 157307)|2.99298000014|(0.998,0.996,0.999)|-1
--PVEAGVTQSPTHLIKTRGQQVTLRCSPIS-G------HTSVYWYQQALGLGLQ---FL
LWYDE-G--E-ERNRGN-FPRRFSGR-QFPNYSSELN------VN-ALELEDSALYLCAS
SL-----
>V156RF-AJFE01070463.1-trbv |(166234, 166534)|2.99594800078|(0.997,0.999,1.000)|-1
--HADTGVSQDPSHKITKRGQNVTFRCDPIS-E------HNRLYWYRQTLGQGPE---FL
TYFQN-E--A-QLEKSRLLSDRFSAE-RPKGSFSTLE------IQ-HTEQGDSAIYLCAS
SL-----
>V157RF-AJFE01070463.1-trbv |(172755, 173052)|2.99288400513|(1.000,0.995,0.998)|-1
--SVAAGVIQSPRYLIKEKRETATLKCYPIP-R------HDTVYWYQQGPGQDPQ---FL
ISFYE-K--M-QSDKGS-IPDRFSAQ-QFSDYHSELN------MS-SLELGDSALYFCAS
SS-----
>V158RF-AJFE01070464.1-trbv |(8813, 9110)|3.0|(1.000,1.000,1.000)|-1
--PLDTAVSQTPKYLVTQMGKKESLKCEQNL-G------HNAMYWYKQDSKKFLK---TM
FIYSN-K--E-PILN-ETVPNRFSPD-SPDKAHLNLH------IN-SLELGDSAVYFCAS
SQ-----
>V159RF-AJFE01070464.1-trbv |(12266, 12563)|2.99799200002|(1.000,0.999,0.999)|-1
--PMEMGVTQTPRHLVMGMTNKKSLKCEQHL-G------HNAMYWYKQSAKKPLE---LM
FVYSL-E--E-RVEN-NSVPSRFSPE-CPNSSHLFLH------LH-TLQPEDSALYLCAS
SQ-----
>V160RF-AJFE01070464.1-trbv |(20566, 20863)|2.99696400065|(1.000,1.000,0.997)|-1
--PVNAGVTQTPKFRVLKTGQSMSLLCAQDM-N------HEYMYWYRQDPGMGLR---LI
HYSVG-E--G-TTAEGE-VPDGYNVS-RLKKQNFLLG------LE-SAAPSQTSVYFCAS
SY-----
>V161RF-AJFE01070464.1-trbv |(52077, 52374)|2.99699200002|(0.999,0.998,1.000)|-1
--PVIAGITQAPTSQILAAGRSMTLRCTQDM-R------HNAMYWYRQDLGLGLR---LI
HYSNT-A--G-TTGKGE-VPDGYSVS-RANTDDFPLT------LA-SAVPSQTSVYFCAS
SD-----
>V162RF-AJFE01070465.1-trbv |(4903, 5200)|2.99899200002|(0.999,1.000,1.000)|-1
--PVNAGVTQSPKFRVLKTGQSMTLQCAQDM-N------HNYMYWYRQDPGMGLR---LI
HYSAG-E--G-TTAKGE-VPDGYNVS-RLNTQNFLLR------LE-SAAPSQTSVYFCAT
SE-----
>V163RF-AJFE01119867.1-ighv |(1662, 1971)|2.53797459541|(0.881,0.888,0.797)|-1
-AQSRVQLAQS-GAEVKKPGASVKVSCKASGYTF--T--SYRMHWVCQAHAQGLE---WM
GLVCPSD--G-STSHAQKFQGRVTITRDTSMSTAYME------LS-SLRSEDTAMYYCVR
-------
>V164RF-AJFE01119883.1-ighv |(31777, 32092)|2.9939280013|(0.996,0.999,0.999)|-1
-VQCEVQLVES-GGGLVQPGGSLRLSCAASGFTF--S--DHYMSWVRQAQGKGLE---LV
RLIRNKANSY-TTEYAASVKGRFTISREDSKNTLYLQ------MS-SLKTEDLAVYYCAR
-------
>V0RF-ABGA01025787.1-ighv |(2055, 2364)|2.9681802388|(0.996,0.990,0.983)|1
-TYSQVQLVQS-GHEVKQPGASVKVSCKDSGYSF--T--TYGMNWVQQAPEQGLE---WM
GWFNTDT--G-NPTYAQGFTGRFVFSMDTSVSTAYLQ------IS-SLKAEDTAMYYCAR
-------
>V2RF-ABGA01025790.1-ighv |(836, 1151)|2.68226604529|(0.986,0.812,0.999)|1
-VQCEVQLVES-GGGLVQPGGSLRLSCAASGFTS--S--DYQMYWVRQASGKGPE---WV
GYIGSKSNSY-ATAYAASVKGRFTISRDDSKNTLYLQ------MN-SLKTEDMAVYYCAR
-------
>V3RF-ABGA01025791.1-ighv |(3901, 4216)|3.0|(1.000,1.000,1.000)|1
-VQCEVQLVES-GGGLVQPGGSLRLSCAASGFTF--S--SYWMSWVRQAPGKGLE---WV
GFIKNKADGG-TTDYAASVKGRFTISRDDSKNTLYLQ------MN-SLKTEDTAIYYCAR
-------
>V5RF-ABGA01025797.1-ighv |(8415, 8724)|2.99599600001|(0.999,0.999,0.998)|1
-VQCEVQLVES-GGGLVQPGGSLRLSCVASGFTF--S--SYAMRWVHQAPGKGLE---WV
SAISG--SGG-STWYPDSVKGRFTISRDNAKNTLYLQ------MN-SLRAEDTAVYYCVR
-------
>V6RF-ABGA01025808.1-ighv |(3704, 4019)|2.99899600001|(1.000,0.999,1.000)|1
-VQCEVQLVES-GGGLVQPGGSLRLSCAASGFTF--S--SSAMHWVRQAPGKGLE---WV
GRIRSKANSY-ATEYAASVKGRFTISRDDSKNTAYLQ------MN-SLKTEDTALYYCTT
-------
>V7RF-ABGA01025808.1-ighv |(11416, 11731)|2.99899200002|(0.999,1.000,1.000)|1
-LQCEVQLVES-GGGLVQPGGSLRLSCAASGFTF--S--DHYMDWVRQAPGKGLE---WV
ARIRNKANSY-TTEYAASVKGRFTISRDDSKNTLYLQ------MS-SLKTEDTAVYYCAR
-------
>V8RF-ABGA01025808.1-ighv |(27673, 27982)|3.0|(1.000,1.000,1.000)|1
-VQCEVQLVES-GGGLVQPGGSLRLSCAASGFTF--R--DHYMNWVRQAPGKGLE---WV
SAISG--SSS-STYYADSVKGRFTISRDNAKNTLYLQ------MN-SLRAEDTAVYYCVR
-------
>V9RF-ABGA01025808.1-ighv |(39511, 39826)|3.0|(1.000,1.000,1.000)|1
-VQCEVQLVES-GGGLVQPGGSLRLSCAASGFTF--S--NYYMSWVRQAPGKGLE---WE
GFIKNKTNGG-TTEYAASVKGRFTISRDDSKSITYLQ------MS-SLKTEDTAVYYCTR
-------
>V10RF-ABGA01025808.1-ighv |(52101, 52413)|2.97596052424|(0.997,0.981,0.999)|1
-VQCELQLVES-RGDLVQPGGSLRLSCAASGFTF--S--SYGMNWVCQAPGKGLE---WV
SVISRS--SG-TIHYADSMKGRFTISRDNAKNSLYLQ------MNNSLRAEDTAVYYCVK
-------
>V11RF-ABGA01025808.1-ighv |(65728, 66037)|2.62235794071|(0.939,0.957,0.801)|1
-VQSQVQLVQS-GAEVKKPGSSVKISCKVSEDTF--S--SYAISWVQQAPGQGLE---WM
GGIIPVL--G-TADYAQKFQGRVTITADTSTSTAYME------LS-SLRSEDTAVYYCAT
-------
>V12RF-ABGA01025810.1-ighv |(7175, 7481)|2.99899200002|(0.999,1.000,1.000)|1
-VQCEVQLVES-GGGLVQPGGSLRLSCAASGFTI--S--SYDMHWVHQAPGKGLE---WV
SAIST--G-G-GTYYADSVKGRFTISRDNAKNTLYLQ------MN-NLRAEDTAVYYCAK
-------
>V13RF-ABGA01037228.1-ighv |(1414, 1723)|2.99494800078|(1.000,0.997,0.998)|1
-VLSQVQLQES-GPGLVKPSETLSLTCAVSGGSI--SSG-YYWGWIRQPPGKGLE---WI
GSIYYS---G-STYYNPSLKSRVTISVDTSKNQFSLK------LS-SVTAEDTAVYYCAR
-------
>V14RF-ABGA01044302.1-ighv |(5170, 5476)|2.99498000014|(0.998,0.997,1.000)|1
-VLSQVQLQES-GPGLVKPSETLSLTCAVSGGSI--S-S-YYWSWIQQPPGKGLE---WI
GYIYS-S--G-STNYNPSLKSRVTMSVDTSKNQFSLK------LS-SVTAADTAVYYCAR
-------
>V15RF-ABGA01044302.1-ighv |(9977, 10286)|2.9669280013|(0.987,0.990,0.990)|1
-AHSQVQLGQS-GPQVKKPESSVKVSCKASGYTF--T--SSAMQWVRQAPGQGLE---WI
GWIIVGS--G-NTNYAQKFQGRVTITRDTSTSTAYME------LS-SLRSEDTAVYYCAA
-------
>V16RF-ABGA01044304.1-ighv |(6033, 6342)|2.99596000066|(1.000,0.997,0.999)|1
-VLSQVQLQES-GPGLVKPSETLSLTCAVSGGSI--SSG-YYWGWIRQPPGKGLE---WI
GSIYYS---G-STYYNPSLKSRVTISVDTSKNQFSLK------LS-SVTAADTAVYYCAR
-------
>V17RF-ABGA01044305.1-ighv |(3517, 3823)|2.99899600001|(1.000,1.000,0.999)|1
-VLSQVQLQES-GPGLVKPSETLSLTCAVSGGSI--S-S-YYWGWIRQPPGKGLE---WI
GYIYS-S--G-STNYNPSLKSRVTMSVDTSKNQFSLK------LS-SVTAADTAVYYCVR
-------
>V18RF-ABGA01044306.1-ighv |(1052, 1358)|3.0|(1.000,1.000,1.000)|1
-VLSQVQLQES-GPGLVKPSETLSLTCAVSGGSI--S-S-NYWSWIRQPPGKGLE---WI
GYIYS-S--G-STYYNPSLKSRVTMSIDTSKNQFSLK------LS-SVTAADTAVYYCAR
-------
>V20RF-ABGA01044307.1-ighv |(456, 762)|3.0|(1.000,1.000,1.000)|1
-VLSQVQLQES-GPGLVKPSETLSLTCAVSGGSI--S--SYYWSWIRQPPGKGLE---WI
GGIYSS---G-STYYNPSLKSRVTISVDTSKNQFSLK------LS-SVTAADTAVYYCAR
-------
>V21RF-ABGA01044310.1-ighv |(2823, 3129)|2.67845004263|(0.998,0.811,1.000)|1
-VQCEVQLVES-GGGLVQPGGSLRLSCAASGFTV--S--SSSMIWVRQAPGKGLE---WV
SYISSD---G-SAYYTDSVKGRFTVSRDNSKNTLYLQ------MN-SLRAEDTAVYYCAK
-------
>V23RF-ABGA01044310.1-ighv |(19040, 19346)|2.36281903207|(0.963,0.965,0.691)|1
--CAEVQLVQS-GAEVKRPGESLRISCKTSGYSF--T--SNWISWVRQMPGKGLE---WM
GSIYPGD--S-DTRYSPSFQGHVTISADKSISTAYLQ------WS-SLKASDTAMYYCAK
-------
>V24RF-ABGA01044313.1-ighv |(11041, 11356)|2.99899600001|(1.000,0.999,1.000)|1
-VQCEVQLVES-GGGLVHPGGSLRLSCTASGFTF--G--DYAMSWVRQAPGKGLE---WV
GFIRSKAYGG-TTEYAASVKGRFTISRDDSKSIAYLQ------MN-SLKTEDTAVYYCAR
-------
>V25RF-ABGA01044314.1-ighv |(13359, 13668)|2.46435240245|(0.995,0.724,1.000)|1
-VQCEVQLVES-GGGLVQPGGSLRLSCAASEFTF--S--SNDMSWVRQAPEKGLE---WV
SYISN--SGR-TTYYADSVKGRFTISRDNAKNSLYLQ------MN-SLRAEDTAVYYCVR
-------
>V27RF-ABGA01044319.1-ighv |(4092, 4401)|2.9939280013|(0.996,0.999,0.999)|1
-VQCEVQLVES-EGGLVQPGGSLRLSCAASGFTF--D--DYAMHWVRQAPGKGLK---WV
SGINWN--GG-STYYADSVKGRFTISRDNSKNSLYLQ------MN-SLRAEDTALYYCAK
-------
>V28RF-ABGA01058270.1-ighv |(14488, 14797)|2.92996799578|(0.988,0.994,0.953)|1
-VLSQVQLQQW-GPGLVKPSETLSLTCAVCGGSI--S-SGYYWSWIRQPPGKGLE---WI
GYMHH-S--G-STYYNPSLKSRVTMSVETSKNQFSLK------LS-SVTAADTAVYYCAR
-------
>V29RF-ABGA01058270.1-ighv |(28194, 28503)|2.96988400513|(0.991,0.993,0.986)|1
-VQCEVQLVES-GGGLVQSRGSLRFSCAASGFTF--S--SCGMNWVRQAPGKGLE---WV
AIIWYD--GS-NKYYADSVKGRFTISRDNSKNMLYLQ------MN-SLRVEDMAVYYCAK
-------
>V30RF-ABGA01058270.1-ighv |(38768, 39077)|2.976900005|(0.994,0.989,0.994)|1
-VLSQVRLQES-GPGLVKPSETLSLTCAVSVDSI--SSG-YYWSWIRQPPGKGLE---WI
GYIHH-S--G-STYYNPSLKSRVTMSVDTSKNQFSLK------LS-SVTAADMAVYYCAT
-------
>V31RF-ABGA01058273.1-ighv |(621, 936)|2.99799600001|(0.999,0.999,1.000)|1
-VQCDVQLVES-GGGLVQPGGSLRLSCAASGFTF--S--DYYMSWVHQPPGKGLE---WV
GLIRNKANGG-TTEYAASVKGRFTISRDDSKSIAYLQ------MN-SLKTEDTAVYYCTR
-------
>V32RF-ABGA01091248.1-trbv |(6357, 6654)|2.21376216846|(0.715,0.947,0.962)|1
--HMDAGITQSPRHKITETGTPVTLKCHQTE-N------RRYMYWCRQDLGHGLR---LI
HYSYG-V--K-DTDKGE-VSDGYSVS-RSKTEDFLLT------LE-SATRSQTSVYFCAI
SE-----
>V34RF-ABGA01091248.1-trbv |(29358, 29658)|2.93880255864|(0.994,0.974,0.974)|1
--HTDAGVIQSPRHEVTEMGKEVTLRCKPIS-G------HEDLFWYRQTMMQGLE---LL
IYFNN-K--A-VMDDSGMPKDRFSAK-MPNASFSTLK------IQ-PSEPRDSAVYFCAS
SL-----
>V35RF-ABGA01091248.1-trbv |(32661, 32961)|2.44333622415|(0.978,0.722,0.974)|1
--HTDAGVIQSPRHEVTEMGKEVTLRCKPIS-G------HDYLFWYRQTMMQRLE---LL
IYFNN-K--A-VMDDSGMPKDRFSAK-MPNASFSTLK------IQ-PSEPRDSAVYFCAS
SL-----
>V38RF-ABGA01091249.1-trbv |(14302, 14599)|2.96832422844|(0.994,0.981,0.994)|1
--HGVAMVIQNPRYQVTQFGKPVTLSCSQNL-N------HNVMYWYQQKSSQAPK---LL
FHYYD-K--D-FNNE-ADTPDNFQSR-RPNTSFCFLD------IR-SPGLGDAAMYLCAT
SR-----
>V39RF-ABGA01091249.1-trbv |(19286, 19586)|2.89400384073|(0.990,0.980,0.936)|1
--SPGEEVTQTPKHLVKGEGQEAKLYCAPIK-G------HSYVFWYQQVLKKEFK---FL
ISFQN-E--N-VFDKTGMPKERFSAK-CLPNSPCSLE------IQ-ATKLEDSAVYFCAS
SQ-----
>V41RF-ABGA01091252.1-trbv |(2503, 2800)|2.98379201242|(0.994,1.000,0.990)|1
--TVDGGITQSPKYLFRKEGQNVTLSCEQNL-N------HDAMYWYRQDPGQGLR---LI
YYSGI-V--N-DFQKGD-IAEGYSVS-REKKESFPLT------VT-SAQKNPTAFYLCAS
SI-----
>V43RF-ABGA01091257.1-trbv |(2769, 3069)|2.96140068997|(0.997,0.981,0.985)|1
--SFHARVTQTPGHLVKGKGQKTKMDCTPEK-G------HTFVYWYQQNQNKEFM---LL
ISFQN-K--Q-VLQETEMHKKRFSSQ-CPKNTPCSLA------TL-SSEPGDTALYLCAS
SQ-----
>V44RF-ABGA01091257.1-trbv |(13504, 13802)|2.90790891268|(0.993,0.989,0.938)|1
--SMDADVTQTPRNRITKTGKRIMLECSQTK-G------HDGMYWYRQDPGLGLR---LI
YYSFD-V--K-DINKGE-ISDGYSVS-RRTQAKFSLS------LE-SATPNQTALYFCAT
SD-----
>V45RF-ABGA01091260.1-trbv |(5031, 5328)|2.96766265282|(0.999,0.996,0.975)|1
--LMEADIYQTPRHLVIGTGKKITLECSQTM-G------HDKMYWYQQDPGMELH---LI
HYSYG-V--N-STEKGD-LSSESTVS-RIRMEHFPLT------LE-SARPSHTSQYLCAS
SE-----
>V46RF-ABGA01091263.1-trbv |(8280, 8583)|2.95741612211|(0.988,0.993,0.977)|1
-SVFSAVVSQKPSRDICQRGTSLTIQCQVDS-Q------VTMMFWYRQQPGQSLT---LI
ATANQGS--E-ATYESGFVIDKFPIS-RPNLTFSTLT------VS-NMSPEDSGIYLCSV
E------
>V47RF-ABGA01099934.1-ighv |(8362, 8671)|2.53851320286|(1.000,0.997,0.755)|1
-VLSQVQLQES-GPGLVKPSETLSLTCAVSGGSI--SSG-YYWGWIRQPPGKGLE---WI
GHINY-G--G-STSYNPSLKSRVTLSVDTSKNQFSLK------LS-SVTAADTAVYYCAR
-------
>V48RF-ABGA01099934.1-ighv |(21569, 21878)|2.61306568643|(0.833,0.903,0.948)|1
-AHSHVQLVQS-GDEVRKPGASVKVSCKASGYTF--T--NHNMDWVRQAPGQGFE---WM
GGINTNT--G-GTSYAQTFQGRVIMTRDTSTNTAFME------LS-SLRSEDMTVYYCAR
-------
>V50RF-ABGA01099938.1-ighv |(2861, 3183)|2.37788596786|(0.780,0.758,0.945)|1
-VLSQVTLKES-GPALVKPTETLTLTCTVSGFSL--SNSKMGVSWIRQPPGKALE---WL
AHIFSN---D-EKSYSTSLKSRLTISKDTSKSQVVLT------MT-NMDPVDTATYYCTR
RAQ----
>V51RF-ABGA01099940.1-ighv |(16077, 16386)|2.98780001921|(0.998,0.999,0.991)|1
-AHAEVQLVQS-GAEVKKPGASVKFSCKVSGYTF--T--ELSMHWVRQAPGKGLE---WM
GGFDPDD--G-ETIYAQKFQGRVTMTEDTSTDTAYME------LS-SLRSEDTAMYYCAT
-------
>V52RF-ABGA01099941.1-ighv |(996, 1308)|2.99798400013|(1.000,0.998,1.000)|1
-VQCEVQLVES-GGGLVQPGGSLRLSCAASGFTF--T--NYYLHWFRQAPGKGLE---WV
AYISSGS-GG-STNYPDSVKGRFTISRDNAKNTLYLQ------MN-SLRAEDTAVYYCAR
-------
>V53RF-ABGA01099941.1-ighv |(12097, 12412)|2.98521630725|(1.000,1.000,0.986)|1
-VQCEVQLVES-GGGLVQPGGSLRLSCAASGFTF--S--NYYMHWVRQAPGKGLE---WV
GFIRTEAKGG-TTEYAASVKGRFTISRDDSKSIAYLQ------TN-SLKTEDTAVYYCTR
-------
>V54RF-ABGA01099945.1-ighv |(5584, 5899)|2.97308440501|(0.997,0.995,0.982)|1
-VQCEVQLVES-GGGLVQPGGSLRLSCAASGFTF--S--NAWLSWVRQAPGKGLE---WV
GRIKSKADGG-TTDYAAPVKGRFTISRDDSKNTLYLQ------MN-SLKTEDTAVYYCAT
-------
>V55RF-ABGA01099946.1-ighv |(22626, 22932)|3.0|(1.000,1.000,1.000)|1
-VQCEVQLVES-GGGLVQPGGSLRLSCAASGFTV--S--SYDMHWVRQAPGKGLE---WV
SAIDTD---G-DTYYADSVKGRFTISRENAKNSLYLQ------MN-SLRAKDTAVYYCAR
-------
>V56RF-ABGA01099946.1-ighv |(36315, 36622)|2.99798400013|(1.000,1.000,0.998)|1
-VQCEVQLVES-GGGLVQPGRSLRLSCAASGITF--S--NQYMSWVRQATGKGLE---WV
SYISG--DSS-YTSYADSVKGRFTISRDNAKNSLYLQ------MN-SLRVEDTAVYYCV-
-------
>V57RF-ABGA01099947.1-ighv |(19776, 20085)|2.99899600001|(1.000,1.000,0.999)|1
-VQCEVQLVES-GGGLVQPGGSLRLSCAASGFTF--S--SYSMSWVRQAPGKGLE---WV
SAISG--SGS-STYYPDSVKGRFTISRDNAKNTLYLQ------MN-SLRAEDMAVYYCVR
-------
>V58RF-ABGA01099948.1-ighv |(6262, 6577)|2.98992000218|(0.996,1.000,0.994)|1
-VQCEVQLVES-GGGLVQPGGSLRLSCAASGFTF--S--NYYMHWVRQAPGKGLE---WV
GFIASKAYGG-TTEYAASVKGRFTISRDDSKSIVYLQ------MN-SLKTEGTAVYYCTR
-------
>V59RF-ABGA01099955.1-ighv |(3480, 3787)|2.554842897|(0.870,0.984,0.782)|1
-VCAEVQLVQS-GAEVKRPGESLRISCKGSGYSF--T--SYWISWVRQMPGKGLE---LM
GIIDPSD--S-DTRYSPSFQGHITISADKSISTAYLQ------WT-SLKASDTAMYYCA-
-------
>V60RF-ABGA01099956.1-ighv |(15185, 15494)|3.0|(1.000,1.000,1.000)|1
-VQCEVQLVES-GGGLVQPGGSLRLSCAASGFTF--S--SYAMYWVRQAPGKGLE---WV
SAINSGG--G-STYYADSVKGRFTISRENAKNTLYLQ------MS-SLRAEDTAVYYCAK
-------
>V61RF-ABGA01104800.1-ighv |(1132, 1438)|2.99593600205|(1.000,1.000,0.996)|1
-VLSQVQLQES-GPGLVKPSETLSLTCAVSGGSI--S-G-YSWSWIRQPPGKGLE---WI
GSIHS-S--G-STYYNPSLKSRVTISADTSKNQFSLK------LS-SVTAADTAVYYCAR
-------
>V62RF-ABGA01104801.1-ighv |(6863, 7169)|2.92979088874|(0.997,1.000,0.944)|1
-VLSQVQLQES-GPGLVKPSETLSLTCAVSGGSI--S-S-YYWSWIRQPPGKGLE---WI
GYIHS-S--G-STNSNPSLKSRVTMSVDTSKNQFSLK------LS-SVTAADTAVYYCAR
-------
>V63RF-ABGA01129113.1-trbv |(1435, 1735)|2.94217355698|(0.987,0.991,0.966)|1
--HTGAGVSQSPRYKVAKRGQDVALRCDSIF-G------HVTFYWYQQTLGQGPE---VL
TYFRS-D--A-QRDKSGLPSGRFSAE-RPEGSVSTMK------IQ-HTEQGDSAVYLCAS
SL-----
>V64RF-ABGA01154382.1-igkv |(15548, 15866)|2.62234548143|(0.980,0.790,0.987)|1
-AYGDIVMTQSPDSLAVSLGERITINCKSSQSVLYSSNNKNYLAWYQQKPGQAPK---LL
IYW------A-STRQSG-VPDRFSGSG--SGTDFTFT------IS-SLQAEDVAVYYCQQ
SYSAP--
>V65RF-ABGA01154383.1-igkv |(2950, 3250)|2.30086119666|(0.848,0.705,0.828)|1
-TRAETTLTQSPAFVSATPGDKVTISCKASQD------IDDDMNWYQQKPGEAAI---FI
IQE------A-TTLISG-IPPRFSGSG--YGTDFTLT------IN-NIESEDAAYYFCLQ
HDNFP--
>V68RF-ABGA01174988.1-ighv |(27125, 27434)|2.99696400065|(1.000,0.997,1.000)|1
-VQCEVQLVES-GGGLVQSRGSLRLSCAASGFTF--S--SCGMNWVRQAPGKGLE---WV
AVIWYD--GS-NKYYADSVKGRFTISRDNSKNMLYLQ------MN-SLRVEDTAVYYCAK
-------
>V69RF-ABGA01174994.1-ighv |(8215, 8524)|2.68510752777|(0.964,0.982,0.820)|1
-AQSQVQLVQS-GAEVKKPGASVKVSCKASGYTF--T--NYYMQWVQQAPGQGLE---WM
REFNTRN--G-NTQYIQEFQGRVTITRDTSTSTAYME------LS-SLRSEDTAVYYCVR
-------
>V70RF-ABGA01174995.1-ighv |(11362, 11671)|2.40051858706|(0.972,0.778,0.849)|1
-AHAKVQLVQS-GAEVKKPGASVKVSCKVSGYTL--T--RLSMHWVRQAPRKGLE---WM
GGFYPVD--G-ETIYAQKFQGRVTMTEDTSTDTAYME------IS-SLRSEDTAVYYCAT
-------
>V71RF-ABGA01174999.1-ighv |(1443, 1758)|3.0|(1.000,1.000,1.000)|1
-VQCEVQLVES-GGGLVQPGGSLRLSCAASGFTF--S--DYYMSWVHQPPGKGLE---WV
GLIRNKANGG-TTEYAASVKGRFTISRDDSKSIAYLQ------MN-SLKTEDTAVYYCTR
-------
>V72RF-ABGA01174999.1-ighv |(24157, 24466)|2.62267548029|(0.962,0.987,0.789)|1
-VQCEVQLVES-GGGLVQAGESLRLSCAASGFTF--S--SYRMNWVRQAPGKGLE---WV
SYISSD--SS-YIYYADSVKVRFTISGDNAKNSMYLQ------MN-NLRAKDTPVYYCVK
-------
>V73RF-ABGA01194059.1-ighv |(3549, 3864)|2.9969280013|(0.997,1.000,1.000)|1
-VQCEVQLVES-GGGLVQPGGSLRLSCAASGFTF--S--NHYMQWVRQAPGKGLE---WV
GLIRNKADGE-TTDYAASVKGRVTISRDDSKSITYLQ------MS-SLKTEDSAVYYCAR
-------
>V74RF-ABGA01194064.1-ighv |(10045, 10354)|2.69848510638|(0.964,0.941,0.848)|1
-VLSQVQLQES-GPGLVKPLETLSLTCAVSGGSI--SSS-NWWSWVRQPPGKGLE---WI
GEIYQ-S--G-STNYNPSLKSRVTISVDKSKNQFSLK------LS-SVTAADTAVYYCAR
-------
>V75RF-ABGA01197604.1-igkv |(7602, 7920)|2.28084042541|(0.989,0.659,0.986)|1
-SSGDIVMTQTPLSLPVTPGEPASISCRSSESLLDTDDEYTYLNWYLQKPGQSPQ---LL
IYE------V-SSQASG-VPDRFSGSG--SGTDFTLK------IS-RVEAEDVGVYYCMQ
ALQTP--
>V76RF-ABGA01198108.1-igkv |(6191, 6491)|2.98898400013|(0.997,0.995,0.997)|1
-ARCDIQMTQSPTSLSASIGDSVTSTCQASQSI------SNELAWYQQKPGKVPK---LL
IYR------V-SSLQMG-IPSRFSGSG--SGTDFTLT------IT-SLQPDDVATYYCQQ
EYSYP--
>V77RF-ABGA01224584.1-trbv |(1799, 2106)|2.39318212177|(0.983,0.987,0.699)|1
--LVDMKVTQSSRYLVKRMGEKVFLECVQDM-D------HERMFWYRQDPGLGLR---LI
YFSYD-V--K-MKEQGD-VPEGYSVS-REKKGHFSLI------LE-SASTNQTSMYLCAS
SLSTA--
>V79RF-ABGA01243343.1-ighv |(9466, 9772)|2.43488316774|(0.869,0.720,0.974)|1
-VLSQVQLQQW-GAGLVKPSETLSLTCAVYGGSF----SDYGWNWIRQPPGKGLE---WI
GYIVS-S--G-RTNYNPSLKSRVTMSVDTSKNQFSLK------LS-SVTAADTAVYYCAR
-------
>V80RF-ABGA01243345.1-ighv |(15320, 15629)|2.99798400013|(1.000,1.000,0.998)|1
-VQCEVQLVES-GGGLVQPGGSLRLSCAASGFTF--S--SYGMHWVRQAPGKGLE---WV
AVIWYDG--S-NKYYADSVKGRFTISRDNSKNTLYLQ------MN-SLRVEDTAVYYCAK
-------
>V81RF-ABGA01276890.1-trbv |(7515, 7815)|2.66421784212|(0.965,0.982,0.810)|1
--LTEAGVAQSPRYKIIEKRQSVAFWCNPIS-G------HATLYWYQQILGQGPK---LL
IQFQN-D--G-VVDDSQLPKDRFSAE-RLKGVDSTLK------IQ-PANLGDSAVYLCAS
SL-----
>V82RF-ABGA01285645.1-igkv |(2124, 2410)|2.84233632021|(0.988,0.905,0.977)|1
-----IVMMQSPATLSVSPGERGTISCRASQSV------SNYLAWYQQKPGQSPR---LL
IYR------A-SNRATG-IPARFSGSG--SGTDFTLT------IS-SVELEDFAVYYCQQ
YNAG---
>V83RF-ABGA01285648.1-igkv |(32619, 32919)|2.99798400013|(1.000,0.998,1.000)|1
-ARCDIQMTQSPSSVSASVGDRVTITCRASQGI------SSALAWYQQKPGKPAK---LL
IYA------A-SSLQSG-VPSRFSGSG--SGTDYTLT------IS-SLQPEDFATYYCQQ
YNSVP--
>V84RF-ABGA01285649.1-igkv |(12602, 12902)|2.98598000014|(0.995,0.997,0.994)|1
-ARCDIQMTQSPSSLSASVGDRVTITCRASQGI------SDDLAWHQQKPGKAPK---LL
IYA------A-SSLQSG-VPSRFSGSE--SGTEFTLT------IS-SLQPEDFATYYCQQ
YNSYP--
>V85RF-ABGA01285651.1-igkv |(14331, 14619)|2.75395116666|(0.985,0.998,0.846)|1
-----IVMTQSPATLSLSPGERATISCRASQSV------SNYLAWYQQKPGQAPR---LL
IHS------A-STRATG-IPARFSGSG--SGTDFTLT------IS-SLEPEDFAVYYCQQ
GNNLP--
>V86RF-ABGA01290070.1-igkv |(266, 566)|2.94276838753|(0.995,0.963,0.989)|1
-TTGEVVLTQSPATLSLSPGERATLSCRASQSV------SNYLAWYQQKPGQAPR---LL
IYD------A-SNRATG-IPARFSGSG--SGTDFTLT------IS-SLEPEDFAVYYCQQ
RSNLP--
>V88RF-ABGA01290201.1-trgv |(11173, 11486)|2.97014531208|(1.000,0.980,0.992)|1
-SQKSSNLEGRTKSVTRPTGSSAEITCDLPGES------TVYIHWYLHQEGKAPQ---RL
LYYDSYN--SRVVLESGISPGKYDTYGST-RKNLRLI------LR-NLIENDSGVYYCAI
WD-----
>V89RF-ABGA01290201.1-trgv |(15529, 15842)|2.95838667423|(0.999,0.999,0.965)|1
-SQKSSNLEGGTKSVTRPTRSSAEITCDLTVTN------AFYIHWYLHQEGKAPQ---RL
LYYDVSN--SRDVLESGLGPGKYYTHT-PRWWSWILI------LR-NLIENDSGVYYCAT
WY-----
>V90RF-ABGA01290202.1-trgv |(2218, 2531)|2.96786491212|(1.000,0.999,0.972)|1
-SQKSSNLEGGTKSVTRPTRSSAEITCDLTVTN------AFYIHWYLHQEGKAPQ---RL
LYYDVST--ARDVLESGLSPGKYYTHT-PRRWSWILR------LQ-NLIENDSGVYYCAT
WD-----
>V93RF-ABGA01301078.1-trbv |(8868, 9168)|2.97639727933|(0.999,1.000,0.979)|1
--HTGAGVSQSPRYKVTKRGQDVALRCDPIS-G------HDYLYWYQQALGQGPE---FL
TYFQN-D--V-QLDKSGMPSDRFSAE-GLEGSISTLK------IQ-RTEQGDSAVYLCAS
SL-----
>V96RF-ABGA01301083.1-trbv |(1589, 1880)|2.99294800078|(0.996,0.999,0.998)|1
----NAGVTQTPKFRILKTGQSMTLQCAQDM-N------HNYMYWYRRDPGMGLK---LI
YYLVA-A--G-TTDKGE-VPDGYSVS-RSTTEDFPLT------LE-SAAPSQTSVYFCAS
SY-----
>V97RF-ABGA01301086.1-trbv |(3670, 3966)|2.99798400013|(1.000,0.998,1.000)|1
--PVDAGVTQSPTHLIKTRGQQVTLRCSPIS-G------HKSVSWYQQALGQGPQ---FI
FEYYE-K--E-ERGRGN-FPDRFSAR-QFPNYSSELN------VN-ALLLGDSALYLCAS
SL-----
>V98RF-ABGA01301086.1-trbv |(10960, 11257)|2.97096034001|(0.998,0.984,0.990)|1
--PMNAGVTQTPKFQVLKTGQSMTLQCAQDM-N------HDYMSWYRQDPGIGLR---LI
HYSVA-A--G-ITEKGE-TPSGYNVS-RSNTEDFPLR------LE-SAAPSQTSVYFCAS
SY-----
>V99RF-ABGA01301086.1-trbv |(15590, 15890)|2.96485201038|(0.990,0.991,0.984)|1
--HTGAGVSQSPRYKVTKRGQDVALRCDPIS-G------HVSLFWYQQALGQGPE---LL
TYFQN-E--V-QLHKSGLPSDRFFAE-RPEGSICTLK------IQ-RTQQEDSAMYLCAS
SL-----
>V100RF-ABGA01313761.1-ighv |(1090, 1396)|3.0|(1.000,1.000,1.000)|1
-VLSQVQLQES-GPGLVKPSETLSLTCAVSGGSI--S-G-YYWSWIRQPPGKGLE---WI
GYIYS-S--G-STNYNPSLKSRVTVSVDTSKNQFSLK------LS-SVTAADTAVYYCAR
-------
>V101RF-ABGA01313763.1-ighv |(465, 774)|2.9669280013|(0.987,0.990,0.990)|1
-AHSQVQLGQS-GPQVKKPESSVKVSCKASGYTF--T--SSAMQWVRQAPGQGLE---WI
GWIIVGS--G-NTNYAQKFQGRVTITRDTSTSTAYME------LS-SLRSEDTAVYYCAA
-------
>V102RF-ABGA01313764.1-ighv |(1353, 1662)|2.80310370387|(0.990,0.881,0.979)|1
-VLSQVQLQES-GPGLVKPSETLSLTCAVSGGSI--SS-SYYWGWIRQPTGKGLE---WI
GHIYSS---G-STYYNPSLKSRVTISVDTSKNQFSLK------LS-SVTAEDTAVYYCAR
-------
>V103RF-ABGA01318850.1-igkv |(776, 1076)|2.99899600001|(1.000,0.999,1.000)|1
-SRCDIQMTQSPSSVSASVGDRVTITCQASQGV------SNALAWYQQKPGKTPK---LL
IYD------A-TTLQSG-VPSRFSGSG--SGTDYTLT------IS-SLQPEDFATYYCQQ
YNSYP--
>V104RF-ABGA01321409.1-igkv |(1894, 2185)|3.0|(1.000,1.000,1.000)|1
----DIQMTQSPSSVSASVGDRVTITCRASQSI------SSWLAWYQQKPGKAPK---LL
IYK------A-SNLQSG-VPSRFSGSG--SGTDFTLT------IS-SLQPEDFATYYCQQ
YSSTP--
>V105RF-ABGA01321410.1-igkv |(12114, 12400)|2.94643621385|(1.000,0.987,0.965)|1
-----IVMTQSPATLSVSPGERGTISCRASQSV------SNYLAWYQQKPGQSPR---LL
IYR------A-SNRATG-IPARFSGSG--SGTDFTLT------IS-SVEPEDFAVYYCQQ
YNTG---
>V106RF-ABGA01335280.1-iglv |(1203, 1509)|2.97280001921|(0.989,0.988,0.996)|1
--DSQTVVTQE-PSFSVSPGGTVTLTCGLSSGSV---STSYYPSWYQQTPGQALR---ML
IYS------T-NTRTSG-VPDCFSGSI--LGNKAALT------IT-GAQADDESDYYCVL
YMGSGI-
>V107RF-ABGA01342015.1-igkv |(1575, 1875)|2.99798400013|(1.000,1.000,0.998)|1
-TRCDIQMTQSPSSLSASVGDRVTITCRASQSI------SNYLAWYQQKPGKVPK---LL
IYA------A-STLQSG-VPSRFSGSG--SGTDFTLT------IS-SLQPEDVATYYCQK
HNSAP--
>V108RF-ABGA01356721.1-igkv |(4236, 4536)|3.0|(1.000,1.000,1.000)|1
-SRCDIQMTQSPSSLSASVGDRVTITCRASQSI------SSWLAWYQQKPGKAPK---LL
IYA------A-SSLQSG-VPSRFSGSG--SGTDFTLT------IS-SLQPEDFATYYCQQ
HNSYP--
>V109RF-ABGA01356722.1-igkv |(4085, 4385)|2.38831848316|(0.971,0.693,0.992)|1
-SRCDIQMTQPPSSMSAYVGDRVTVNCQASQGI------SSWLAWYQQKPGKAPK---LL
IYK------A-SSLQSG-VPSRFSGSG--SGTDYTLT------IS-SLRPEDFATYYCQQ
ANGVP--
>V110RF-ABGA01356724.1-igkv |(802, 1093)|2.99899200002|(0.999,1.000,1.000)|1
----DIQMTQSPSSVSASVGDRVTITCRASQGI------SNYLNWYQQKPGKAPK---LL
IYA------A-SSLQSG-VPSRFSGSG--SGTDFTLT------IS-SLQPEDFATYYCQH
FNSYP--
>V111RF-ABGA01356726.1-igkv |(7542, 7842)|2.99280401921|(1.000,0.993,1.000)|1
-TTGEIVLTQSPATLSLSPGERATVSCRASQSV------SNYLAWYQQKPGQSPR---LL
IYD------A-SNRATG-IPARFSGSG--SGTDFTLT------IS-SLEPEDFAVYYCQQ
YNNQT--
>V112RF-ABGA01356729.1-igkv |(273, 573)|2.99698000014|(1.000,0.999,0.998)|1
-ARCDIQMTQSPSSVSASVGDRVTITCRASQGI------SSYLAWYQQKPGKAPK---LL
IYA------A-SSLQSG-VPSRFSGSG--SGTEFTLT------IS-SLQPEDFATYYCMQ
HNSYP--
>V113RF-ABGA01362157.1-ighv |(1861, 2165)|2.70226363924|(0.877,0.986,0.886)|1
--CAEVQLVQS-GAEVKRPGESLRISCKGSGYSF--T--SYWISWVRQMPGKGLE---LM
GMIDPSD--S-DTRYSQSFQGHITISADKSISTAYLQ------WT-SLKASDTAMYYCA-
-------
>V115RF-ABGA01384193.1-ighv |(10967, 11276)|2.99899600001|(1.000,1.000,0.999)|1
-VQCEVQLVES-GGGLVQPGGSLRLSCAASGFTF--S--SYGMNWVRQAPGKGLE---WV
SYISGDS--S-YINYADSVKGRFTISRDNAKNSLYLR------MN-SLRAEDTAVYYCVK
-------
>V116RF-ABGA01386446.1-trav |(520, 807)|3.0|(1.000,1.000,1.000)|1
--VNSQQGEEDPQALSIQEGENATMNCSYKTS-------INNLQWYRQNSGRGLV---HL
ILIRSNE--R-EK-----HSGRLRVTLDTSKKSSSLL------IT-ASRAADTASYFCAT
D------
>V117RF-ABGA01386446.1-trav |(6159, 6450)|2.9828400105|(0.997,0.995,0.991)|1
-RTNGDPVTQTEGPVTLPERAALTLNCTYQSSY------SAFLFWYVQYLNKEPE---LL
LRSS-EN--Q--E--T--DSRGFQASHVKSDSSFHLE------KP-SVQLSDSAVYYCVL
R------
>V118RF-ABGA01386446.1-trdv |(9538, 9841)|2.97037212748|(0.992,0.998,0.981)|1
-SSMAQKVTQAQAAISVVEKEEVTLDCVYETRD-----ATYYLFWYKQPSSGELV---FL
IRQNSFN--E-Q----NEVNGRYSWNFQKSTSSFNLT------IT-ASQVMDSAVYFCAL
SE-----
>V121RF-ABGA01387831.1-trav |(4904, 5207)|2.96370048487|(0.990,0.975,1.000)|1
-PGIAQKITQTLPAMFVQEKEAVTLDCTYDTSD-----QSYGLFWYKQPSSGEMI---LL
IYQGSYD--K-Q----NATEGRYSLNFQKARKSANLV------IS-ASQLGDSAMYFCAM
KE-----
>V122RF-ABGA01387833.1-trav |(6325, 6619)|2.97412824764|(0.985,0.992,0.998)|1
-RTHGDSVTQMEGPVTLSEEAFLTINCTYTATG------YPSLFWYVQYPGEGLQ---LL
LKATKAD--D--K--G--SNKGFEATYHKETTSFHLE------KD-SVRESDSGVYFCAL
S------
>V123RF-ABGA01387833.1-trav |(37695, 37988)|2.99298000014|(0.998,0.999,0.996)|1
VWCQQKEVEQNPGPLSVPEGAIASLNCTYSNSA------FQYFMWYRQYSRKGPE---LL
IYIYSSG--N-K------QDGRFTAQVDTSGKYMSLF------IR-DSQPSDSATYLCAM
S------
>V124RF-ABGA01394059.1-igkv |(7736, 8051)|2.58666682788|(0.996,0.918,0.817)|1
-SSGDIVMTQSPLSLPVTPGEPASISCRSSQSLLHS-NRYNYLNWYLQKPGQSPQ---LL
IYL------G-SNRASR-VPDRFSGSG--SGTDFTLK------IS-RVEAEDVGVYYCTQ
TLQTP--
>V125RF-ABGA01394062.1-igkv |(9765, 10067)|2.9791803079|(0.997,0.983,1.000)|1
-SSAEIVMTQTPLSLSITPGEPASISCRSSQSLL-HSDGNTYLHWYLQKPGQPPQ---LL
IYE------V-SNRFSG-VPDRFSGSG--SGTDFTLK------IS-RVEAEDVGVYYCMQ
D------
>V127RF-ABGA01394066.1-igkv |(10063, 10363)|2.94475367204|(0.993,0.972,0.982)|1
-TTGEIVLTQSPATLSLSPGERATLSCRASQSV------SNYLAWYQQKPGQVPR---LL
IYR------A-SNRTTG-IPDRFSGSG--SGTDFTLT------IS-RLDPEDFAVYYCQQ
YGSSP--
>V128RF-ABGA01394066.1-igkv |(40656, 40948)|2.22201297559|(0.990,0.635,0.993)|1
-SRGDIVMTQSPAFLSVTPVEKVTITCQASEG------ISNYLNWYQQKPDQAPK---LL
IKY------A-SQSISG-VPSRFSGSG--SGTDFTFT------IS-SLEAEDAATYYCQQ
GN-----
>V129RF-ABGA01394068.1-igkv |(3664, 3964)|3.0|(1.000,1.000,1.000)|1
-SRCDIQMTQSPSSVSASVGDRVTITCRASQGI------SNYLAWYQQKPGKAPK---LL
IYY------A-SSLQSG-VPSRFSGSG--SGTDYTLT------IS-SLQPEDFATYYCQQ
YNSYP--
>V130RF-ABGA01394071.1-igkv |(1743, 2043)|2.99899200002|(0.999,1.000,1.000)|1
-SRCDIQMTQSPSSLSASVGDRVTITCQASQGI------SNALAWYQQKPGKTTK---LL
IYR------A-SSLQSG-VPSSFSGSG--SGTDFTLT------IS-SLQPEDFATYYCQQ
YYSDP--
>V131RF-ABGA01394075.1-igkv |(3782, 4082)|2.96833728137|(0.998,0.978,0.994)|1
-TTGEIVMTQSPATLSLSPRERATISCRASQS------VSSNLAWYQQKPGQAPR---LL
IYG------A-SNRATG-IPARFSGSG--SGTDFTLT------IS-SLEPEDFAVYYCQQ
YNNWP--
>V132RF-ABGA01047585.1-trbv |(3005, 3305)|2.27817489325|(0.796,0.708,0.805)|-1
--CFHAKVTQTPGYLVKGKGKKTKMYCTPEK-G------HTFVCWYQQNQNKEFM---FL
ISFQN-E--Q-VLQETEMHKKRFSSR-CPKNPPCSLA------IL-SLEPGDTALYLCAS
SP-----
>V136RF-ABGA01083932.1-trav |(371, 664)|2.97226014987|(0.992,0.981,1.000)|-1
-VSRGESVRPHLSTLGVQEGDNSVINCAYSDSA------SDYFIWYKQESGKGPQ---FI
IDIRSNM--D-KR-----QGQRVTVLLNKTVKHLSLQ------IA-ATQPGDSAVYFCAE
N------
>V137RF-ABGA01083934.1-trav |(495, 792)|2.98364403777|(0.999,0.991,0.994)|-1
-GTRAQSVTQLDSHVSVSEGALVLLRCNYSSSV------SPYLFWYVQYPNQGLQ---LL
LKYTSGT--T-LV--K--GINGFEAEFKKSETSFHLT------KP-SAHVSDTAQYFCAV
S------
>V138RF-ABGA01083937.1-trav |(4214, 4504)|2.994|(0.998,0.998,0.998)|-1
--VNGENVEQHPSTLSVQEGDSSVIKCTYSDSA------SNYFPWYKQEVGKGPQ---FI
IDIRSNM--G-EK-----KDQRITVILNKTAKHFSLH------IT-ETQPGDSAVYFCAA
S------
>V140RF-ABGA01083939.1-trav |(4457, 4751)|2.99899600001|(1.000,1.000,0.999)|-1
-GINGDSVVQTEGQVLLSEGDSLIVNCSYETTQ------YPSLFWYVQYPGEGPQ---LL
LKAMKAN--D--K--G--RNKGFEATYRKETTSFHLE------KD-SVQESDSAVYFCAL
S------
>V141RF-ABGA01083939.1-trav |(18067, 18360)|3.0|(1.000,1.000,1.000)|-1
-GSGKNQVEQSPQSLIILEGKNCTLQCNYTVSP------FSNLRWYKQDTGRGPV---SL
TIMTFSE--N-T-----KSNGRYTATLDADTKQSSLH------IT-ASQLSDSASYICVV
S------
>V142RF-ABGA01083939.1-trav |(34050, 34338)|2.98979201242|(1.000,0.994,0.996)|-1
VWSQQKEVEQDPGPFNVPEGATVAFNCTYSNSA------SQSFFWYRQDCRKEPK---LL
MSVYSSG--N-E-------NGRFTAQLNRASQYISLL------IR-DSQLSDSATYLCAV
-------
>V143RF-ABGA01083939.1-trav |(39521, 39818)|2.96950008499|(0.995,0.985,0.990)|-1
-GTRAQSVTQLDSHVPVSEGTRVLLRCNYSSSY------SPSLFWYVQHPNQGLQ---LL
LKYLSGP--T-LV--K--GINGFEAEFKKSETSFHLT------KS-SAHVSDAAEYFCAM
S------
>V144RF-ABGA01113129.1-trav |(4972, 5260)|2.97456408064|(0.994,0.984,0.997)|-1
--VKSQKIEQNSEALNIQEGKTATLTCNYTNYS------PTYLQWYRQDPGRGPV---FL
LLIRENE--K-EK-----RKERLKVSFDTTLKQSLFH------IT-ASQPADSATYFCAL
-------
>V145RF-ABGA01113130.1-trav |(6720, 7010)|2.98870803341|(1.000,0.997,0.992)|-1
-MSRGEDVEQTL-FLSVQEGDSSVINCTYTDSS------STYLYWYKQEPGAGLQ---LL
TYIFSNM--D-LK-----QDQRLTVLLNKKDKHLSLR------IA-DTQTGDSAIYFCAE
H------
>V146RF-ABGA01113133.1-trav |(15271, 15560)|2.95106440553|(0.990,0.975,0.987)|-1
-----QSVAQPEDEVTVAEGNPLTVKCTYSVSG------NPYLFWYIQYPNEGLQ---FL
LKYITGD--N-LV--K--GSYGFEAEFNKSQTSFHLK------KP-SALVSDSALYFCAV
RD-----
>V147RF-ABGA01132346.1-trgv |(695, 1008)|2.96507224753|(0.999,0.997,0.972)|-1
-SQKSSNLEGGTKSVTRPTRSSAEITCDLTVTN------ALYIHWYLHQEGKAPQ---RL
LYYDVST--ARDVLESGLSPGKYYTHT-PRRWSWILR------LQ-NLIENDSGVYYCAT
WD-----
>V148RF-ABGA01154384.1-igkv |(10732, 11047)|2.64719424734|(0.959,0.959,0.812)|-1
-CNGDIVLTQSPASLAMSPGQRATITCRASESVSV-LGMTNLIHWYQQKPGQPPK---LL
IYR------A-SNKDTG-VPARFSGSG--SGTDFTLT------IN-PVEADDAANYYCMQ
SKNFP--
>V149RF-ABGA01154386.1-igkv |(10957, 11257)|2.93343797113|(0.997,0.998,0.948)|-1
-ARCDIQMTQSPSSLSASVGDRVTITCRASQGI------SSWLAWYQQKPGKAPK---PL
IYK------V-SSLESG-IPSRFSGSE--SGTEFTLT------IS-SLQPEDFATYYCQQ
YNSVP--
>V150RF-ABGA01161530.1-igkv |(226, 526)|2.99799600001|(0.999,1.000,0.999)|-1
-IRCDIQMTQSPSSLSASVGDRVTITCRASQGI------SNYLNWYQQKPGKAPK---LL
IYR------A-SNLQTG-VPSGFSGSG--SGTDFTLT------IS-SLQPEDIATYYCQQ
YDNLP--
>V152RF-ABGA01180641.1-igkv |(2646, 2946)|2.99799600001|(0.999,1.000,0.999)|-1
-ARCDIQMTQSPSSVSASVGDRVTITCRASQSI------SSWLAWYQKKPGKAPK---LL
IYK------A-SSLQSG-VPSRFSGSG--SGTEFTLT------IS-SLQPEDFATYYCTQ
HNSYS--
>V153RF-ABGA01180644.1-igkv |(8050, 8350)|2.99899600001|(1.000,0.999,1.000)|-1
-ARGDIQMTQSPSSLSASVGDRVTITCRASQSI------SSYLAWYQQKPGKAPK---PL
IYA------A-SNLQSG-VPSRFSGSG--SGTEFTLT------IS-SLQPEDFATYYCQQ
YKSDP--
>V154RF-ABGA01180644.1-igkv |(24182, 24473)|2.99398000014|(0.999,0.997,0.998)|-1
----DIQMTQSPSSVSASVGDRVTISCRASQSI------SSWLAWYQKKPGKAPK---LL
IYK------A-SSLQSG-VPSRFSGSG--SGTEFTLT------IS-SLQPEDFATYYCTQ
HNSYP--
>V155RF-ABGA01199503.1-igkv |(3988, 4290)|2.67902954621|(0.969,0.851,0.922)|-1
-SSGDVVMTQSPLSLPVTLGQPASISCRSSQSLVH-SDGNTYLNWFQQRPGQPPR---RL
IYK------V-SNRDSG-VPDRFSGSG--AGTDFTLK------IS-RVEAEDVGVYYCMQ
G------
>V156RF-ABGA01203420.1-ighv |(3238, 3560)|2.98557605748|(1.000,0.995,0.991)|-1
-VQCEVQLVES-GGGLVQPGGSLRLSCAASGFTV--S--SNEMSWIRQAPGKGLE---WV
STISRG---G-STYYTDSVKGRFTISRDNSKNTLYLQ------MN-SLRVEDTAVYYCAR
DTVKG--
>V158RF-ABGA01223433.1-trbv |(4452, 4749)|2.99194800078|(0.999,0.996,0.997)|-1
--PVNAGVTQTPKFHVLKTGQSMTLQCAQDM-N------HDYMSWYRQDPGMGLR---LI
HYSAG-A--G-ITDKGE-VPNGYNVS-RLNTEDFQLR------LE-SAAPSQTSVYFCAS
SY-----
>V159RF-ABGA01225869.1-trbv |(7999, 8296)|2.9734040992|(0.997,0.987,0.990)|-1
--PLEAQVTQNPRYLITVTGKKLKVTCSQNM-N------HEYMSWYRQDPGLGLR---QI
YYSMN-V--E-VVDKGD-VPEGYNVS-RKEKRNFPLI------LE-SPSPNQTSLYFCAS
SL-----
>V160RF-ABGA01225869.1-trbv |(13353, 13650)|2.38314133294|(0.984,0.991,0.694)|-1
--LVDVKVTQSSRYLVKRMGEKVFLECVQDM-D------HERMFWYRQDPGLGLR---LI
YFSYD-V--K-MKEQGD-VPEGYSVS-REKKGHFSLI------LE-SASTNQTSMYLCAS
SL-----
>V161RF-ABGA01252206.1-iglv |(13174, 13484)|2.90036630143|(0.997,0.966,0.950)|-1
-SWDQSALIQP-PSMSGSPGQSVTISCTGTSSDV---GGYNYVSWYQQHPGTAPK---LM
IYA------V-SNQPSG-VPNRFSGSK--SGNTASLT------IS-GLQAEDEADYYCSS
YAGSNN-
>V163RF-ABGA01252210.1-iglv |(1732, 2028)|2.64813404735|(0.936,0.851,0.896)|-1
-SVASYELTQP-LSVSVAPGQTARITCGGNN--I---GS-KAVQWYQQKPGQAPL---LV
IYS------D-SNRPSG-IPEQFSGSN--LGNTATLT------IS-GAQAGDEADYYCQV
RDSST--
>V164RF-ABGA01252215.1-iglv |(9236, 9539)|2.98450011724|(0.998,0.987,1.000)|-1
-SEASYELTQP-PSVSVSPGQTARITCSGDA--L---PK-KYAYWFQQKSGQAPV---LV
IYK------D-SKRPSG-IPERFSGSS--SGTMATLT------IS-GAQVEDEADYYCYS
TDSSGNH
>V165RF-ABGA01252216.1-iglv |(11892, 12202)|2.71488045338|(0.988,0.875,0.920)|-1
-SWAQSALTQP-RSVSGSPGQSVTISCTGTSSDI---GGYNAVSWHQQHPGKAPK---LM
IYD------V-SNRPSG-VPNRFSGSK--SGNMASLT------IS-GLQAEDEADYYCSS
YAGSYT-
>V166RF-ABGA01252218.1-iglv |(480, 780)|2.98221630725|(0.999,0.985,0.999)|-1
-SVTSYELTQP-HSVSVATAQTARITCGGNN--I---GS-KAVHWYQQKPGQAPV---LV
IYD------D-SNQPSG-IPERFSGSN--SGNTATLT------IS-GAQAGDEADYYCQV
WDSSKH-
>V167RF-ABGA01252219.1-iglv |(2097, 2400)|2.99185201038|(0.999,1.000,0.993)|-1
-SATSYELTQP-PSVSVAPRQTARITCGGNN--I---GS-KSVHWYQQKPGQAPV---LV
IYG------D-SNRPSG-ISERFSGSN--SGNTATLT------IS-RVEAGDEAVYYCQV
WDSSSDY
>V168RF-ABGA01252219.1-iglv |(9992, 10295)|2.99699200002|(0.999,1.000,0.998)|-1
-SATSYELTQP-PSVSVAPRQTARITCGGNN--I---GS-KSVHWYQQKPGQAPV---LV
IYG------D-SDRPSG-ISERFSGSN--SGNTATLT------IS-RVEAGDEAVYYCQV
WDSSSDY
>V169RF-ABGA01252219.1-iglv |(17960, 18263)|2.96586891211|(0.999,0.971,0.999)|-1
-SVVSSELTQD-PAVSVTLGQTVKITCQGDS--L---RS-YYASWYQQKPGQAPV---LV
IYG------N-NNRPSG-IPDRFSGAS--SGNTASLT------IT-GAQAEDEADYYCNS
WDGSGNH
>V170RF-ABGA01252219.1-iglv |(34167, 34477)|2.99698000014|(0.998,1.000,0.999)|-1
-SWAQSALTQP-PSVSGSPGQSITISCTGTSSDV---GGYNYVSWYQQHPGTAPK---LM
IYD------V-SKRPSG-VPDRFSGSK--SGNTASLT------IS-GLQTEDEADYYCSS
YRSGDT-
>V171RF-ABGA01252219.1-iglv |(46613, 46923)|2.994|(0.998,0.998,0.998)|-1
-SWAQSALTQP-ASVSGSPGQSITISCTGTSSDV---GGYNYVSWYQQHPGKAPK---LM
IYD------V-SKRPSG-VPDRFSGSK--SGNTASLT------IS-GLQAEDEADYYCSS
YRSGST-
>V172RF-ABGA01252219.1-iglv |(70767, 71077)|2.98021230726|(0.998,0.999,0.984)|-1
-SWAQSALTQP-PSVSGSPGQSITISCTGTSSDI---GGYNAVSWYQQHPGKAPK---LM
IYE------V-SKRPSG-VPDRFSGSK--SGNTASLT------IS-GLQAEDEADYYCSS
YRSGGT-
>V173RF-ABGA01252220.1-iglv |(4657, 4954)|2.52975274784|(0.974,0.808,0.884)|-1
-SVDSYELTQP-PSVSVSPGQTARITCSGDV--L---GE-NYADWYQQKPGQAPV---LV
IYK------D-SERPPG-IPERFSGST--SGNTTTLT------IS-SVLTEDKADYYCLS
GDEDN--
>V175RF-ABGA01252221.1-iglv |(89127, 89430)|2.20457294712|(0.985,0.625,1.000)|-1
-FEASYELTQP-HSVSVSPGQMARITCSGEE--L---PE-NYAYWYQQKPGQSPV---LV
IYK------D-SERPSG-IPERFSGSS--SGTTVTLT------IS-GVQAEDEADYYCQS
ADSSGTY
>V176RF-ABGA01252241.1-iglv |(4150, 4460)|2.4671826891|(0.843,0.753,0.940)|-1
-SLSQSMLTQP-ASLSASPGASASLTCTLRSDIN---VGTYRIYWYQQKPGSPPR---YL
LRYKSDS--D-KHQGSG-VPSRFSGSKDASANAGLLL------IS-GLQSEDEAGYYCMI
-------
>V177RF-ABGA01252241.1-iglv |(8984, 9293)|2.98080401921|(0.996,0.989,0.996)|-1
-SWAQSVLTQP-PSASGTPGQRVTISCSGSSSNI---G-SNYVYWYQQFPGMAPK---HL
IYD------N-NQQPSG-VPDRFSGSK--SGTSASLA------IS-GLRSKDEADYYCAA
WDNSLSG
>V179RF-ABGA01252243.1-iglv |(44201, 44510)|2.98376801985|(0.998,0.991,0.995)|-1
-SWAQSVLTRP-PSVSAAPGQKVTISCSGSSSNI---GNY-AVSWYQQLPGTAPK---LL
IYE------N-NKRPSG-ISDRFSGSK--SGTSATLG------IT-GLQTGDEADYYCSA
WDSSLSA
>V180RF-ABGA01252243.1-iglv |(49802, 50111)|2.98560004313|(1.000,0.994,0.992)|-1
-SWAQSVLTQP-PSASGTPGQRVTISCSGSSSNI---G-SNYVYWYQQFPGMAPK---LL
IYD------N-NQRPSG-VPDRFSGSK--SGTSASLA------IS-GLRSEDEADYYCAA
LDNSLSG
>V181RF-ABGA01252248.1-iglv |(2689, 2998)|2.27516007741|(0.817,0.688,0.836)|-1
-SVVQAGLTQP-PSVSKGLRQTATLTCTGNSNNV---GNQ-GAAWLQQHQGHPPK---LL
SYR------N-NNRPSG-ISERFSASR--SGNTASLT------IT-GLQPEDEADYYCSA
WDSSLSA
>V182RF-ABGA01252248.1-iglv |(12457, 12769)|2.97121230726|(0.995,0.981,0.996)|-1
-SWAEVVFTQP-HSVSGSPGQTVTISCTRSSGSI---DN-RYVYWYQQRPGSAPT---TV
IYD------D-NQRPSG-VPDRFSGSIDSSSNSASLT------IS-GLKSEDEADYYCQS
ANDSHN-
>V183RF-ABGA01252249.1-iglv |(2028, 2335)|2.60202169148|(0.959,0.783,0.978)|-1
-SWANFMLTQP-HSVSGSVGQKVIISCTRSSGSI---GS-YYVQWYQQHSGSAPT---TV
INK------D-NQRPSG-VPDRFSGSIDSSSNSASLT------IS-GLKTEDEADYYCQS
YDSS---
>V185RF-ABGA01257764.1-igkv |(8367, 8682)|2.67877754921|(0.993,0.905,0.870)|-1
-SSGDVVMTQTPLSLPVTPGEPASISCRSSQSLLHS-DGNTYLDWYLQKPGQSPQ---LL
IYR------V-SNRASG-VPDRFSGSG--SGTDFTLK------IS-RVEAEDVGVYYCMQ
ATKTP--
>V187RF-ABGA01257772.1-igkv |(3885, 4185)|2.99899600001|(1.000,0.999,1.000)|-1
-ARCAIQMTQSPSSLSASVGDRVTITCRASQGI------SNELSWYQQKPGQAPT---LL
IYA------A-SSLQSG-VPSRFSGSG--SGTDFTLT------IS-SLQPEDVATYYCLQ
DYTTP--
>V188RF-ABGA01257777.1-igkv |(9241, 9556)|2.42895248839|(0.989,0.714,0.987)|-1
-SSGDIVMTQTPLSLPVTLGQPASMSCRSSQSLLDS-DGYTYLDWYLQKPGQSPQ---LL
IYE------V-SNRASG-VPDRFSGSG--SGTDFTLK------IS-RVEAEDVGVYYCMQ
ALQVP--
>V189RF-ABGA01259417.1-trbv |(2271, 2571)|2.98782001102|(0.997,1.000,0.991)|-1
--HADTGVSQDPRHKITKRGQNVTFRCDPIS-E------HNRLYWYRQTLGQGPE---FL
TYFQN-E--A-QQEKSGLFSDQFSAE-RPKGSFSTLK------IQ-RTEQGDSAMYLCAS
SL-----
>V190RF-ABGA01276916.1-igkv |(1327, 1627)|2.99899600001|(1.000,1.000,0.999)|-1
-ARCDIQMTQSPSSVSASVGDRVTITCRASQSI------SSWLAWYQQKPGKAPK---LL
IYK------A-SNLQSG-VPSRFSGSG--SGTDFTLT------IS-SLQPEDFATYYCIQ
HSSTP--
>V193RF-ABGA01277802.1-trbv |(3406, 3702)|2.2651038276|(0.863,0.716,0.790)|-1
--PVQAGVTQSPTHLIKMRGQQVTLRCSPFS-G------HTSVSWYQQSLGQGPQ---FI
FEYAN-E--L-RRSKGN-FPDRFSGR-QFRDYHSEMN------VS-ALELGDSALYLCAS
RL-----
>V194RF-ABGA01277802.1-trbv |(6147, 6443)|3.0|(1.000,1.000,1.000)|-1
--PVDSGVTQTPKHLITATGQRVTLRCSPRS-G------DLSVYWYQQSLDQGLQ---FL
IQYYN-G--E-EREKGN-ILERFSAQ-QFPDLHSELN------LS-SLELGDSALYFCAS
SV-----
>V195RF-ABGA01277803.1-trbv |(1353, 1650)|2.24617204078|(0.879,0.716,0.786)|-1
--PVQAGVTQSPTHLIKMRGQQVTLRCSPFS-G------HTSVSWYQQSLGQGPQ---FI
FEYAN-E--L-RRSKGN-FPDRFSGR-QFRDYHSEMN------VS-ALELGDSALYLCAS
KV-----
>V196RF-ABGA01277806.1-trbv |(4577, 4874)|2.39175213741|(0.961,0.802,0.811)|-1
--PVIAGITQAPRSQILAAGRSVTLRCTQDM-R------HNAMYWYRQDLGLGLR---LI
HYSNT-A--G-TIGKGE-VPDGYSVS-RANTDDFPLT------LV-SAIPSQTSVYFCAS
SD-----
>V197RF-ABGA01277808.1-trbv |(1866, 2166)|2.95787637781|(0.997,1.000,0.965)|-1
--HTGAGVSQSPSNKVTEKGKDVELRCDPIS-G------HTALYWYRQSLGQGLE---FL
IYFQG-N--S-APDESGLPSDRFYAE-RSGGSISTLK------IQ-HTQQEDSAMYLCAS
SL-----
>V198RF-ABGA01277809.1-trbv |(3151, 3448)|2.95763747374|(0.999,0.997,0.966)|-1
--PLDTAVSQTPKYLVTQMGKKESLKCEQNL-G------HDAMYWYKQDSKKFLK---IM
FIYNN-K--E-PILN-ETVPNRFSPN-SPDKAHLQLH------IS-SLELGDSAVYFCAS
SQ-----
>V200RF-ABGA01277809.1-trbv |(14738, 15029)|2.98880001921|(0.999,0.998,0.992)|-1
----NAGVTQIPKFRVLKTGQSMTLQCAQDM-N------HDYMYWYRQDPGMGLR---LI
HYSAG-E--G-TTTKGE-VPDGYNVS-RLKKQNFLLG------LE-SAAPSQTSVYFCAS
SY-----
>V201RF-ABGA01277810.1-trbv |(2890, 3187)|2.99696400065|(1.000,1.000,0.997)|-1
--PVNAGVTQTPKFQVLKTGQSMILQCAQDM-N------HDYMYWYRQDPGMGLR---LI
HYSLD-V--G-TTDKGE-VPDGYNVS-RLNIQNFLLR------LE-SAAPSQTSVYFCAS
SE-----
>V202RF-ABGA01277810.1-trbv |(5526, 5817)|2.97491252616|(0.996,1.000,0.980)|-1
----NAGVTQTPKFRVLKTGQSITLQCAQDM-N------HNSMYWYRQDPGMGLR---LI
HYSVG-A--H-STEKGE-VPDGYNVS-RLNTQNFLLR------LK-SAAPSQTSVYFCAS
SE-----
>V203RF-ABGA01277811.1-trbv |(730, 1043)|2.58377507263|(0.914,0.931,0.795)|-1
--PMETGVTQTPRHLVMGMTNKKSLKCEQDL-G------HNAMYWYKQSAEKPPE---LM
FVYNL-K--E-PTEN-NSVPSRFSPE-CPNSSHLFLH------LH-ALQPEDSALYLCAS
SQDTALQ
>V204RF-ABGA01277815.1-trbv |(5061, 5368)|2.99098000014|(0.998,0.997,0.996)|-1
--PVNAGVTQTPKFQVLKTGQSMTLQCAQDM-N------YDNMYWYRQDPGMGLK---LI
HYSVG-E--G-TTDKGE-VPDGYNVS-RLNRQNFLLR------LE-SAAPSQTSVYFCAS
GYSTA--
>V205RF-ABGA01277825.1-trbv |(768, 1064)|2.34469042311|(0.889,0.688,0.921)|-1
--PVEAGVTQTPRCLIKTRGRQVTLSCSPIS-G------HRSVSWYQQTPGQGLQ---FL
FEYFS-G--T-QREKGN-FPDRFSGH-QFSNSRSEMN------VS-ALELGDSALYLCAS
SL-----
>V207RF-ABGA01277827.1-trbv |(7144, 7457)|2.91756728515|(0.988,0.992,0.945)|-1
--PIDTEVTQTPKHLVMGMTNKKSLKCEQHM-G------HRTMYWYKQKAKKPPE---LM
FAYSY-E--K-LSIN-ESVPSRFSPE-CPKSSLLNLH------LH-ALQPEDSALYLCAS
SQDTALQ
>V213RF-ABGA01277831.1-trbv |(20035, 20348)|2.94940816598|(0.980,0.992,0.978)|-1
--PIDTGITQTPKHLVMGMANKKSLKCEQHM-G------HKAMYWYKQKVKKPPE---LM
FVYNY-E--E-LSIN-ESVPSRFSPE-CPKSSLLNLH------LH-ALQPEDSALYLCAS
SQDTALQ
>V215RF-ABGA01315458.1-igkv |(1340, 1640)|2.94296483513|(0.997,0.998,0.955)|-1
-TTGEIVMTQSPATLSLSPGERATLSCRASQSV------SNYLAWYQQKPGQAPR---LL
IYG------A-SNRATG-IPARFSGSG--SGTDFTLT------IS-SLEPEDFAVYYCQQ
GNNLP--
>V218RF-ABGA01321068.1-trav |(6457, 6745)|3.0|(1.000,1.000,1.000)|-1
-LSGELKVGQNPLFLSTQEGKNYTIYCNYSTTS-------DRLYWYRQDPGKSLE---SL
FVLLSNG--A-VK-----QEGRLMASLDTKARLSTLH------IT-AAVHDLSATYFCAV
-------
>V219RF-ABGA01321070.1-trav |(796, 1096)|2.99798400013|(1.000,1.000,0.998)|-1
-FSMAQTVTQSQPEMSVQEAETVTLSCTYDTSE-----SDYYLFWYKQPPSRQMI---LV
IRQEAYK--Q-Q----NATENRFSVNFQKAAKSFSLK------IS-DSQLGDAAMYFCAY
R------
>V220RF-ABGA01321072.1-trdv |(3234, 3535)|2.72156949297|(0.996,1.000,0.830)|-1
-SSMAQTVTQSQPEMSVQEAETVTLSCTYDTSE-----SNYYLFWYKQPPSRQMI---LV
IRQEAYK--Q-Q----NATENRFSVNFQKAVKSFSLK------IS-DSQLGDTAMYFCAF
M------
>V221RF-ABGA01321081.1-trav |(7033, 7323)|2.54632087064|(0.808,0.898,0.930)|-1
-VSSEDKVVQSPLSLVVHEGDTVTLSCNYEVAN------FRSLLWYKQEK-KAPT---FL
FMLTSSG--I-EK-----KSGKLSSILDKKELFSILN------IT-ATQTRDSAIYLCAV
E------
>V223RF-ABGA01322683.1-igkv |(9303, 9618)|2.28868629676|(0.992,0.659,0.996)|-1
-SSGDIVMTQTPLSLPVTLGQPASMSCRSSQSLLDS-YGNTYLDWYLQKPGQSPQ---LL
IYE------V-SNRASG-VPDRFSGSG--SGTDFTLK------IS-RVEAEDVGVYYCMQ
ATQTP--
>V224RF-ABGA01349559.1-trbv |(456, 747)|2.30558045698|(0.877,0.696,0.857)|-1
--LMEADIYQTPRHCVIRTGKKITLECSQTM-G------HDKMYWSRSRNGITPH---PL
FL--W-V--N-STEKGD-LSFESTVS-RIRIERFPLT------LE-SASPSHTSQYLCAS
SE-----
>V227RF-ABGA01360476.1-ighv |(4349, 4657)|2.94778801933|(0.981,0.988,0.979)|-1
-AHSQVQLVQS-GAEVKKPGTSVKISCKASGYTF--T--SYYMHWVRQAPGQGLE---WI
GRINPNS--G-NTNYAQKFQGRVAMTRDTSISTAYME------LR-SLRSEDTATYYCGE
-------
>V228RF-ABGA01360478.1-ighv |(1164, 1473)|2.93010611876|(0.977,0.959,0.997)|-1
-AHSQVQLVQS-GAEVKKPGASVKFSCKASGYTF--T--DYFMHWMLQAPGQRLE---WM
GWISAGN--G-NTKYSQKFQGRVTITRDTSASTAYME------LS-SLRSEDTAVYYCVR
-------
>V229RF-ABGA01360480.1-ighv |(4035, 4344)|2.69848510638|(0.964,0.941,0.848)|-1
-VLSQVQLQES-GPGLVKPLETLSLTCAVSGGSI--SSS-NWWSWVRQPPGKGLE---WI
GEIYQ-S--G-STNYNPSLKSRVTISVDKSKNQFSLK------LS-SVTAADTAVYYCAR
-------
>V0RF-AQIA01007569.1-iglv |(1992, 2302)|2.27217729504|(0.971,0.910,0.685)|1
-SWAQSAPIQS-PSVSGSLGQSVTISCTGTSSDI---GRYNYVSWYRQQPGTTTK---LM
MYK------V-NMRPSG-VSDRFSGSK--SGNTASLT------IS-GLQAEDEADYYCSS
YEASDT-
>V1RF-AQIA01007574.1-iglv |(14067, 14370)|3.0|(1.000,1.000,1.000)|1
-SWAQAAPTQP-PSVSGSPGQSVTISCTGTSSDI---GGYNRVSWYQQHPGKAPK---LM
IYE------V-SKRPSG-VSDRFSGSK--SGNTASLT------IS-GLQAEDEADYYCSS
YAGS---
>V2RF-AQIA01007574.1-iglv |(37774, 38077)|2.99696400065|(1.000,0.997,1.000)|1
-SAASYELTQP-PSVSVSPGQTARITCSGDA--L---PK-KYAYWFQQKPGQSPV---LI
IYE------D-SKRPSG-IPERFSGSS--SGTVATLT------IS-GAQVEDEADYYCYS
TDSSGNH
>V4RF-AQIA01007574.1-iglv |(48578, 48881)|2.99899600001|(1.000,1.000,0.999)|1
-SWAQAALTQP-PSVSGSPGQSVTISCTGTSSDI---GGYNRVSWYQQHPGKAPK---LM
IYE------V-SKRPSG-VSDRFSGSK--SGNTASLT------IS-GLQAEDEADYYCSS
YASS---
>V5RF-AQIA01007575.1-iglv |(6771, 7074)|2.99899600001|(1.000,1.000,0.999)|1
-SWAQAALTQP-PSVSGSPGQSVTISCTGTSSDV---GGYNYVSWYQQHPGKAPK---LM
IYD------V-SKRPSG-VSDRFSGSK--SGNTASLT------IS-GLQAEDEADYYCSS
YAGS---
>V7RF-AQIA01007576.1-iglv |(8743, 9046)|2.99289600501|(0.999,0.994,1.000)|1
-SAVSYELTQP-PSVSVSPGQTARITCGGDN--L---GS-KYVHWYQQKPAQAPV---LV
IYY------D-SDRPSG-IPERFSGSK--SGNTATLT------IS-GVEAGDEADYYCQV
WDSSSDH
>V8RF-AQIA01007576.1-iglv |(19712, 20015)|2.99899600001|(1.000,0.999,1.000)|1
-SWAQAALTQP-RSVSGSPGQSVTISCTGTSSDI---GGYNYVSWYQQHPGTAPK---LM
IYE------V-SKRPSG-VSDRFSGSK--SGNTASLT------IS-GLQAEDEADYYCCS
YAGS---
>V10RF-AQIA01007576.1-iglv |(37606, 37909)|2.73182373437|(0.993,0.835,0.999)|1
-SAASYDVTQP-RSVSVSPGQTARITCGGDN--I---GS-KVVHWYQQKPAQAPV---LV
IYR------D-SNRPSG-IPERFSGSN--SGNTATLT------IS-GVEAGDEADYYCQV
WDSSSDH
>V11RF-AQIA01007576.1-iglv |(45242, 45545)|2.99798400013|(1.000,1.000,0.998)|1
-SVVSSELTQD-PAVSVALGQTVRITCQGDS--L---RS-YYASWYQQKPGQAPV---LV
VYG------N-NNRPSG-IPERFSGSS--SGNTASLT------IT-GAQVEDEADYYCDS
WDSSGTH
>V12RF-AQIA01007576.1-igkv |(63773, 64083)|2.26506802271|(0.835,0.693,0.816)|1
-SWAQAALTQP-PSVSKSLGQSVTISCAGTSSGI---ASYSDVSWYQQHPGTAPR---LL
IYR------V-SNRPSG-VSDRFSGFK--SGSTASLT------IS-GLQAEDEAIYYCCS
YRSGST-
>V13RF-AQIA01007576.1-iglv |(72187, 72490)|2.99289600501|(0.999,0.994,1.000)|1
-SATSYELTQP-PSVSAASGQTARITCGGDN--I---GS-KNVQWYQQKPAQAPV---LV
IYA------D-SDRPSG-IPERFSGSN--SGNTATLT------IS-GVEAGDEADYYCQV
WDSSSDH
>V14RF-AQIA01007584.1-iglv |(1279, 1588)|2.99899600001|(1.000,1.000,0.999)|1
-SWAQSVLTQP-PSASEAARKSVTISCSGSSSNI---G-SNSVSWYQQLPGTAPK---LL
IYY------N-DQRASG-VSDRFSGSK--SGTSASLA------IS-GLQTEDEADYYCAA
WDDSLSG
>V15RF-AQIA01007585.1-iglv |(7569, 7879)|2.24871077712|(0.972,0.889,0.689)|1
-SLSQPVLTQP-ASLSASPGASASLTCTFSGGIN---VAGYHIFWYQQKPGSPPR---YL
LRYKSDS--D-KGQGSG-VPSRFSGSKDASANTGILR------IS-GLQSEDEADYYCAI
-------
>V16RF-AQIA01007586.1-iglv |(17179, 17489)|2.96915712206|(1.000,0.990,0.981)|1
-SLSQPVLTQP-TSLSASPGASARLSCTLSSGIN---VGSYSIYWYQQKPGSPPR---YL
LYYYSDS--S-KHQGSG-VPSRFSGSKDASANAGLLL------IS-GLQSEDEADYYCAI
-------
>V17RF-AQIA01007586.1-iglv |(27894, 28201)|2.9868400105|(0.997,0.991,0.999)|1
-SWAQSVLTQP-PSVSAVPGQKVTISCSGSSSNI---G-RSCVSWYQQVPGTAPK---LL
IYQ------D-NKRPSG-VSDRFSGSK--SGTSASLA------IT-GLQTGDEADYYCSA
WDSSLS-
>V18RF-AQIA01007586.1-iglv |(32056, 32365)|2.96716819862|(0.988,1.000,0.980)|1
-SWAQSVLTQP-PSVSGDPGQRVTISCTGSSSNI---G-GYDVYWYQQLPGTAPK---LL
IYE------N-NKRPSG-VSDRFSGSK--SGTSASLA------IT-GLQSEDEAEYYCET
WDNSLNG
>V19RF-AQIA01007586.1-iglv |(37066, 37373)|2.98866005261|(1.000,0.991,0.998)|1
-SWAQSVLTQP-PSVSGDPGQRVTISCTGSSSNI---G-GYYVYWYQQFPGTAPK---LL
IYD------N-NKRPSG-VSDRFSGSK--SGTSASLT------IT-GLQPGDEADYYCGA
WDSSLS-
>V20RF-AQIA01007586.1-iglv |(42885, 43192)|2.98432022844|(0.999,1.000,0.986)|1
-SWAQSVLTQP-PSVSGAPGQRVTISCTGSSSNI---G-GYYVSWYQQLPGTTPK---LL
IYQ------D-NKRPSG-VSDRFSGSK--SGTSASLT------IT-GLQTEDEADYYCLS
YDSSLS-
>V21RF-AQIA01007587.1-iglv |(5318, 5628)|2.9256309073|(0.999,0.946,0.992)|1
-SLSQPVLTQP-TSLSASPGASVRLTCTLRSGIS---VGGYNIHWYQQKPGSPPR---YL
LYYYSDS--N-KGQGSG-VPSRFSGSKDASANAGILL------IS-GFQSEDEADYYCTT
-------
>V22RF-AQIA01007587.1-iglv |(10143, 10452)|2.99899600001|(1.000,0.999,1.000)|1
-SWAQSVLTQP-PSASGAPGQSVTISCSGSSSNI---G-SNYVNWYQQLSGKAPK---LL
IYN------N-NQRPSG-VPDRFSGSK--SGTSASLA------IS-GLQSEDEADYYCAA
WDSSLSG
>V23RF-AQIA01007588.1-iglv |(1406, 1715)|3.0|(1.000,1.000,1.000)|1
-SWAQSVLTQP-PSASGAPGQSVTISCSGSSSNI---G-SNDVYWYQQFPGTAPK---LL
IYY------S-NQRPSG-VPDRFSGSK--SGTSASLA------IT-GLRSEDEADYYCAA
WDDSLSS
>V24RF-AQIA01007588.1-iglv |(19880, 20189)|2.49620148976|(0.983,0.734,1.000)|1
-SWAQSVLTQP-PSASGAPGQSVTISCSGSSSNI---R-GNGVHWYQQLSGMAPK---LL
IYN------N-NQRPSG-VPDRFSGSK--SGTSASLA------IT-GLRSEDEADYYCEA
WDNSLSG
>V25RF-AQIA01007589.1-iglv |(4140, 4447)|2.99696400065|(1.000,1.000,0.997)|1
-SWAQSVLTQP-PSVSGAPGQRVTISCTGSSSNI---G-GYYVQWYQQLPGTAPK---LL
IYE------N-NKRPSG-VSDRFSGSQ--SGTSASLT------IT-GLQSEDEADYYCQS
YDSSLS-
>V26RF-AQIA01007589.1-iglv |(26788, 27098)|2.96788223716|(0.998,0.975,0.997)|1
-SLSQPVLTQP-TSLSASPGASARLTCTLSSGIS---VGSYRIFWYQQKPGSPPR---YL
LNYHTDS--D-KHQGSG-VPSRFSGSKDASANAGILL------IS-GLQSEDEADYYCMI
-------
>V27RF-AQIA01007590.1-iglv |(12131, 12441)|2.98771202074|(1.000,0.994,0.994)|1
-SWAEVVFTQP-HSVSGSPGQTVTISCTRSSGSI---GS-SYVYWYQQRPGSAPT---TV
IYK------D-NQRPSG-VPDRFSGSIDSSSNSASLT------IS-GLKSEDEADYYCQS
YDSSG--
>V30RF-AQIA01007600.1-iglv |(7012, 7324)|2.9844326145|(0.986,1.000,1.000)|1
-SWAEVVFTQP-HSVSGSPGQTVTISCTRSSGSI---DS-KYVQWYQQRPGSAPT---TV
IYK------D-NQRPSG-VPDRFSGSIDSSSNSASLA------IS-GLKSEDEADYYCQS
ADGSYN-
>V31RF-AQIA01007605.1-iglv |(38320, 38626)|2.99596000066|(1.000,0.999,0.997)|1
--DSETVVTQE-PSLSVSPGGTVTLTCGLSSGSV---STSNYPSWYQQTPGQAPR---TL
IYS------T-NTRPSG-VPDRFSGSI--LGNKAALT------IT-GAQADDESDYYCTL
YMGSGI-
>V32RF-AQIA01007915.1-ighv |(45465, 45774)|2.21775528257|(0.949,0.987,0.627)|1
-VQCEVQLVEP-GGGLVQPGGSMRLSCAASGFTF--S--SYGMSWVHQTPGKGLE---WV
STISGN--GV-STWYPDAVKGQFTISRNNTKNSLYLQ------MN-SLSVEDIAVYYCAK
-------
>V33RF-AQIA01009600.1-iglv |(7837, 8140)|2.99899200002|(0.999,1.000,1.000)|1
-SWAQSAPTQP-PSVSGSPGQSVTISCTGTSSDV---GGYNYVSWYQQHPGKAPK---LM
IYG------V-SKRPSG-VSDRFSGSK--SGNTASLT------IS-GLQAEDEADYYCCS
YTTS---
>V34RF-AQIA01009600.1-iglv |(20648, 20951)|2.97068883957|(0.996,0.998,0.978)|1
-SAASYDLTQP-PSVSVSPGQTARITCGGDN--I---GS-EVVNWYQQKPPQAPV---LV
IYA------D-SERPSG-IPERFSGSN--SGNTATLT------IS-GVEAGDEADYYCQV
WDISSDH
>V35RF-AQIA01009608.1-iglv |(4448, 4751)|2.95852104271|(0.994,0.975,0.991)|1
-SWAQSALTQP-PSVSKSLGQSVTISCTGTSSDI---GGYNGVSWYQQHSGTAPR---LL
IYE------V-SKRPSG-VSDRFSGSK--SGNTASLT------IS-GLQAEDEADYYCCS
YRSG---
>V36RF-AQIA01017094.1-igkv |(176237, 176552)|2.9791803079|(0.999,0.996,0.985)|1
-SSGDIVMTQTPLSLSVTPGEPASISCRSSQSLL-HSNGYTYLHWYLQKPGQSPQ---LL
IYL------V-SNRPSG-VPDRFSGSG--SGTDFTLK------IS-RVEAEDVGVYYCEQ
TLQTP--
>V37RF-AQIA01017096.1-igkv |(35522, 35822)|2.99899600001|(1.000,1.000,0.999)|1
-ARCDIQMTQSPSSLSASVGDRVTVTCRASQGI------NKELSWYQQKPGKAPT---LL
IYA------A-SSLQTG-VSSRFSGSG--SGTDYTLT------IS-SLQPEDVATYYCLQ
DYNTP--
>V39RF-AQIA01017097.1-igkv |(8073, 8388)|2.78828137072|(0.991,0.893,0.949)|1
-SSGDIVMTQTPLSLPVTPGEPASISCRSSQSLLDS-DGYTCLDWYLQKPGQSPQ---LL
IYE------V-SNRVSG-VPDRFSGSG--SGTDFTLK------IS-RVEAEDVGVYYCMQ
SIEFP--
>V40RF-AQIA01017097.1-igkv |(38546, 38864)|2.69679548528|(0.993,0.990,0.823)|1
-SSGDIVMTQTPLSLPVTPGEPASISCRSSQSLLDSEDGNTYLDWYLQKPGQSPQ---PL
IYE------V-SNRASG-VPDRFSGSG--SDTDFTLK------IS-RVEAEDVGVYYCMQ
YTHIP--
>V42RF-AQIA01017097.1-igkv |(61240, 61555)|2.68748934849|(0.903,0.863,0.931)|1
-SSGDIVMTQTPLSLPVTLGEPASISCRSSQSLV-YSDGKTYLYWYLQKPGQSPQ---LL
MYL------V-SKRASG-VPDKFSGSG--SGTDFTLK------IS-RVEAEDVGVYYCMQ
ALRSP--
>V44RF-AQIA01017097.1-igkv |(69341, 69641)|2.99698000014|(0.998,1.000,0.999)|1
-ARCDIQMTQSPSSLSASVGDTVTITCRASQGI------NNELAWYQQKPGKAPT---LL
LYS------G-SSLHTG-VPSQFSGSG--SGTDFTLT------IS-SLQPEDVATYYCRQ
DYNTP--
>V45RF-AQIA01017097.1-igkv |(77437, 77752)|2.75386451177|(0.952,0.859,0.980)|1
-SSGDIVMTQTPLSLPVTPGEPASISCRSSQSLLDS-DGYTHLHWYLQKPGQSPQ---LL
MYL------V-SNRASG-VPDRFSGSG--SGTDFTLK------IS-RVEAEDVGVYYCMQ
TLQTP--
>V46RF-AQIA01017099.1-igkv |(11233, 11548)|2.64010870056|(0.995,0.868,0.886)|1
-TSGDIVMTQTPLSLPVTPGEPASISCRSSQSLLHS-NGYTYLFWYLQKPGQSPQ---LL
IYL------V-SNRASG-VPDRFSGSG--SGTDFTLK------IS-RVEAEDVGVYYCLQ
DIQLP--
>V47RF-AQIA01017099.1-igkv |(19461, 19761)|2.99699200002|(0.999,1.000,0.998)|1
-ARCDIQMTQSPSALSASVGDRVTISCRASQNI------YSGLAWYQQKPGKAPK---LL
IYA------A-SRLQSG-IPSRFSGSG--SGTDFTLT------IS-SLQPEDSAAYYCQQ
VYSNP--
>V48RF-AQIA01017100.1-igkv |(7491, 7806)|2.98232417086|(1.000,0.995,0.988)|1
-TSGDIVMTQTPLSLPVTPGEPASISCRSSQSLLHS-DGYTYLDWYLQKPGQSPQ---LL
IYL------G-SKRASG-VPDRFSGSG--SGTDFTLK------IS-RVEAEDVGVYYCMQ
GTQLP--
>V49RF-AQIA01017105.1-igkv |(1136, 1436)|3.0|(1.000,1.000,1.000)|1
-ARCDIQMTQSPSSLSASVGDTVTITCRASQGI------SNDLAWYQQKPGETPK---LL
IYE------A-SSLQSG-IPSRFSGSG--SGTDFTLT------IS-SLQSEDFATYYCQH
YYSTP--
>V50RF-AQIA01017109.1-igkv |(27445, 27743)|2.79768519657|(1.000,0.999,0.867)|1
-ARCDIQMTQSPSSLSASVGDRVTITCQASQGI------SNNLAWYQQKPGKVPK---LL
IYK------A-STLQSG-VPSRFSGSG--SGTDFTLT------IS-SLQPEDFATYYCQH
GYGI---
>V51RF-AQIA01017115.1-igkv |(12703, 13003)|2.97129965252|(1.000,0.974,1.000)|1
-ARCDIQMTQSPSSLSASVGDRVTITCRASENV------NNYLHWYQQKPGKAPK---LL
IYA------A-STLQSG-VPSRFSGSG--SGTDYTLT------IS-SLQSEDVATYYCQH
SYGTP--
>V52RF-AQIA01017115.1-igkv |(28053, 28368)|2.38831325867|(0.984,0.800,0.826)|1
-SSGDIVMTQTPLSLPVTPGEPASISCRSSQSLL-HSDGNTYLYWYLQKPGQPPR---LL
IYR------V-SNRFSG-VPDRFSGSG--SGTDFTLK------IS-RVKAEDVGVYYCMQ
ALQTP--
>V53RF-AQIA01017115.1-igkv |(33048, 33363)|2.62943652995|(0.974,0.827,0.922)|1
-SSGDIVMTQTPLSLPITPGEPASISCRSSQSLL-HSNGNTYFHWYLQKPGQSPQ---LL
IYG------G-SNRASG-VPDRFSGSG--SGTDFTLK------IS-KVEAEDVGVYYCVQ
AIAFP--
>V54RF-AQIA01017115.1-igkv |(51966, 52281)|2.47023643314|(0.989,0.737,0.970)|1
-SSGDIVMTQTPLSLPVTPGEPASISCRSSQSLL-HSNGNTYLYWYLQKPGQPPR---LL
IYR------V-SNRFSG-VPDRFSGSG--SGTDFTLK------IS-RVEAEDVGVYYCMQ
ALQTP--
>V55RF-AQIA01017115.1-igkv |(73836, 74136)|3.0|(1.000,1.000,1.000)|1
-ARCDIQMTQSPSSLSASVGDRVTITCRASQGI------SNWLAWYQQKPGKAPK---LL
IYR------A-SNLETG-VPSRFSGSG--SGTDFTLT------IS-SLQPEDIATYYCQQ
HDNSP--
>V56RF-AQIA01017115.1-igkv |(81810, 82124)|2.51394133518|(0.976,0.881,0.804)|1
-SSGDIVMTQTPLSLPVTPGEPASISCRSSQSLL-HSNGNTYLHWYLQKPGQSPR---LL
IYK------V-TNRESG-VPDRFSGSG--SGTDFTLK------IS-RVEPEDVGVYYCMQ
STKDP--
>V57RF-AQIA01017139.1-igkv |(30471, 30771)|2.97845211916|(0.988,0.999,0.992)|1
-TTGQVILTQSPATLSLSPGERATLSCRASQSV------SSYLAWYQQKPGQAPR---LL
IHS------A-SSRATG-IPDRFSGSG--SGTEFTLT------IS-SLEPEDVGVYHCYQ
YYSGY--
>V59RF-AQIA01017140.1-igkv |(859, 1159)|2.98696800026|(0.997,0.995,0.995)|1
-AKCDIQMTQSPTFLSASVGDRVTIACRASQSI------NKGLAWYQQKPGKAPK---LL
ISY------A-SNLYTD-VPSRFSGSG--SGTDFTLT------IS-SLQPEDAATYYCFQ
YNSYP--
>V61RF-AQIA01017150.1-igkv |(11178, 11496)|2.98768003481|(1.000,0.996,0.992)|1
-ACGDIVMTQSPDSLAVSLGERVTINCKSSQSLLYSSNNKNYLAWYQQKPGQAPK---LL
IYW------A-STRESG-VPNRFSGSG--SGTDFTLT------IS-GLQAEDVAVYYCQQ
YYSTP--
>V63RF-AQIA01046502.1-trgv |(44235, 44548)|2.99593600205|(1.000,1.000,0.996)|1
-SQKSSNLEGRTKSVTRPTGSSAEITCDLPEVS------SFYIHWYLHQEGKAPQ---RL
LYYDSSN--SRVVLESGISPGKYDTYGS-TRSNLRLI------LR-NLIENDSGVYYCAN
WD-----
>V64RF-AQIA01046502.1-trgv |(48629, 48942)|2.98553608204|(1.000,0.996,0.990)|1
-GQKSSNLEGITKSVTRPTGSSAEITCDFSGDS------NFYIHWYLHQEGKVPQ---RL
LYYDVSN--SRDVLESGLSPGKYYTHT-RTRWSWILI------LR-NLIENDSGVYYCAN
WD-----
>V65RF-AQIA01046502.1-trgv |(58146, 58459)|2.94891739643|(0.994,0.983,0.974)|1
-SQKSSNLEGRTKSVTRPTGSSAEITCDLPEVS------SFYIHWYLHQVGKAPQ---RL
LYYDTSN--SRVVLESGISPGKYDSYGST-RNNLRLR------LR-NLIENDSGVYYCAN
WD-----
>V67RF-AQIA01048525.1-trbv |(43379, 43692)|2.25866510854|(0.950,0.974,0.646)|1
--SLDTAVSQTPKYLVTQTGKNEYLKCEQNL-G------HDTMYWYKQDSKKLLK---IM
FSYNN-K--Q-LIIN-ETVPNRISPD-SPDKAHLNLH------IK-SLELGDSAVYFCAS
SQGTALQ
>V68RF-AQIA01048525.1-trbv |(48020, 48317)|2.99299600001|(0.998,0.998,0.997)|1
--PIDSGVTQTPKHLVMGMTNKKSLKCEQHM-G------HRAVYWYKQKVKKPPE---IM
FMYNY-E--K-LSIN-ESVPSRFSPE-CSQSSLFYLH------LR-ALQPEDSALYLCAS
SQ-----
>V69RF-AQIA01048525.1-trbv |(56235, 56535)|2.39353264806|(0.877,0.947,0.703)|1
--HTEPEVTQTPSHQVTQMGQEVILRCVPIS-N------HFYFYWYRQILGQKVE---FL
VSFYN-G--K-ISEQSEIFEDQFSVG-RSDGVHFTLK------IK-STKLEDSAMYFCAS
SE-----
>V72RF-AQIA01048525.1-trbv |(78854, 79151)|2.99293600205|(0.999,0.995,0.999)|1
--PLDTAVFQTPKYLVTQMGKKESLKCEQNL-G------HDTMYWYKQDSKKLLK---IM
FIYSN-K--E-PILN-ETVPNRFSPE-SLDKAHLNLH------IK-SVELGDSAVYFCAS
SQ-----
>V73RF-AQIA01048525.1-trbv |(83218, 83515)|2.97739727933|(1.000,0.980,0.999)|1
--PTDTGVTQTPKHLVMEMTNKKSLKCEQHM-G------HNAMYWYKQKAKKPPE---LM
FVYQY-E--K-LSIN-ESVPSRFSPE-CSKSSLLYLH------LR-ALQPEDSALYLCAS
SQ-----
>V74RF-AQIA01048525.1-trbv |(94178, 94474)|2.60681692207|(0.974,0.874,0.854)|1
--PVEAGVTQTPRSLIKMRGQQATLSCSPIS-G------HRSVYWYQQTPGQGLQ---FL
FEYFS-E--T-QRQKGN-FSNRFSGR-QFSNSRSEMN------VS-TLELGDSALYLCAS
SL-----
>V75RF-AQIA01048526.1-trbv |(5857, 6154)|2.99899600001|(1.000,1.000,0.999)|1
--PANADVTQSPKFQILKTGQSMTLQCAQDM-N------HNSMYWYRQDPGMGLR---LI
HYSAT-E--D-TTDPGE-VPDGYSVS-RLNKKEFLLR------LE-SAALSQTSVYFCAS
SE-----
>V76RF-AQIA01048526.1-trbv |(20529, 20842)|2.87968234754|(0.977,0.983,0.929)|1
--SLDTAVSQTPKYLVRQTGKNESLKCEQNL-G------HNAMYWYKQDSKKLLK---IM
FIYNN-K--E-PILN-ETVPYRFSPK-SPDKAHLNLH------IK-SLELGDSAVYFCAS
SQDTALQ
>V77RF-AQIA01048526.1-trbv |(23960, 24257)|2.91805208401|(0.995,0.998,0.938)|1
--PMETGVTQTPRHLVMGMTNKKSLKCEQHL-G------HNAMYWYKQKAKKPPE---LM
FIYNF-K--E-RAEN-NSVPSRFSPE-CPDSSHLHLH------LR-ALQPEDSALYLCAS
SQ-----
>V78RF-AQIA01048526.1-trbv |(35703, 36000)|2.99493200206|(1.000,0.999,0.996)|1
--PVNAGVTQTPKFQVLKTGQNMTLKCAQDM-N------HDRMYWYRQDPGMGLR---LI
HYSAG-E--G-STEKGE-VPNGYNAS-RLNKKDFLLR------LE-SAAPSQTSMYFCAS
SE-----
>V79RF-AQIA01048527.1-trbv |(3129, 3429)|3.0|(1.000,1.000,1.000)|1
--HTGAGVSQSPRNKVTEEGKDVVLRCDPIS-G------HTALYWYRQSLGKGLE---FL
IYFQG-N--D-APDKSGLPSGRFSAE-RTEGSVSTLK------IQ-RTEQGDSAVYLCAS
SL-----
>V80RF-AQIA01048527.1-trbv |(25700, 26000)|2.97196052424|(0.997,0.995,0.981)|1
--HTGAGVSQSPSNKVTEKGKDVELRCDPIS-G------HAVLYWYRQNLGQGLE---FL
IYFQG-T--G-AVDDSGLRSDRVSAT-RPEGSVSTLK------IQ-HTEQGDSAMYFCAS
SL-----
>V81RF-AQIA01048528.1-trbv |(4386, 4682)|2.66443757078|(0.950,0.901,0.857)|1
--SVDTGVTQSPTHLIKTRGQQVTLRCSPIS-G------HNTVSWYQQAPGQGPQ---FI
FEYAN-E--L-RTSEGN-FPHRFSGR-QFRDYHSEMN------VS-ALELGDSALYLCAS
SL-----
>V82RF-AQIA01048528.1-trbv |(7069, 7365)|2.97959608|(0.997,0.996,0.987)|1
--SVDCGVTQTPKHLITAIGQQVTLRCSPRS-G------DRSVYWYQQSLGQGLQ---FL
IQYYN-G--E-ERAKGN-ILERFSAQ-QFADLHSELN------LS-SLELGDSALYFCAS
SE-----
>V87RF-AQIA01048530.1-trbv |(44934, 45231)|2.99798400013|(1.000,1.000,0.998)|1
--PVNAGVTQTPKFQVLKTGQSMTLQCAQDM-N------HDYMYWYRQDPGMGLR---LI
HYSVG-E--G-STEKGE-VPDGYNVT-RSNTEDFPLR------LE-SAAPSQTSVYFCAS
SD-----
>V88RF-AQIA01048530.1-trbv |(49166, 49466)|2.97580866856|(0.997,0.980,1.000)|1
--HTGAGVSQSPRYKVTKRGQDVALRCDPIS-G------HDYLYWYQQALGQGPA---FL
TYFQD-D--A-QRDKSGLPNDRFSAE-RTEGSVSTLK------IQ-RTEQGDSAVYLCAS
SL-----
>V89RF-AQIA01048530.1-trbv |(57090, 57380)|2.4295412437|(0.958,0.924,0.734)|1
----QAGVTQSPTHLIKTRGQQVTLRCSPIS-G------HTNVYWYQQALGQGPQ---FI
LWYDE-E--E-ERDRGT-FPHRFSGH-QFPNYSSELN------VN-ALEVEDSALYLCAS
SL-----
>V91RF-AQIA01048530.1-trbv |(82295, 82592)|2.99198400013|(0.998,0.998,0.996)|1
--LVNVGVTQTPKFQVLKTGQSMTVQCAQDM-N------HNFMYWYRQDPGMGLR---LI
HYSGA-A--G-TTDKGE-VPSGYNVS-RLNTEDFPLR------LE-SADPSQTSVYICAS
SY-----
>V92RF-AQIA01048530.1-trbv |(86912, 87212)|2.97955704207|(1.000,0.981,1.000)|1
--HTVARVSQSPRYKVTKRGQDVALRCDPIS-G------HATLYWYQQALGQGPE---LL
TYFSY-E--A-QQDKSGLPSDRFSAE-RPEGSVSTLK------IQ-RTQQGDSAVYLCAS
SL-----
>V93RF-AQIA01048530.1-trbv |(109105, 109405)|2.98471202074|(0.999,0.993,0.993)|1
--HTGAGVSQSPRYKVTERGQDVALRCDPIS-G------HDYLYWYQQALGQGPE---LL
TYFNY-K--A-QPDKSGLPNDRFSAE-RPEGSVSTLK------IQ-RTEQRDSAVYLCAS
SL-----
>V94RF-AQIA01048530.1-trbv |(114175, 114471)|2.9839000027|(0.997,0.994,0.993)|1
--PVDAGVTQSPTHLIKTRGQQVTLRCSPIS-G------HTSVSWYQQALGQGPQ---LI
FEYDR-K--E-ERVRGN-FPDRFSGR-QFPNYSSELN------VN-ASEMGDSALYLCAS
SL-----
>V95RF-AQIA01048530.1-trbv |(120217, 120514)|2.94806440553|(0.977,0.980,0.992)|1
--PGNAGVNQTPKFQVLKTGQSMTLQCAQDM-N------HECMSWYRQDPGMGLR---LI
HYSVG-A--G-ITDKGE-VPNGYNVS-RSNTEDFPLR------LE-SAASSQTSVYFCGS
SD-----
>V96RF-AQIA01048531.1-trbv |(13036, 13336)|2.98209640489|(0.999,0.984,1.000)|1
--HTGAGVSQFPRYRVTKRGQDVTLRCDPIS-G------HEYLYWYQQAPGQGPE---FL
TYFQN-D--A-QPDKSGLPNDRFSAE-RTEGSVSTLK------IQ-RTEQGDSAVYLCAS
SL-----
>V97RF-AQIA01048531.1-trbv |(21500, 21796)|2.65571078915|(0.996,0.940,0.833)|1
--PVDTGVTQSPTHLIKTRGQQVTLRCSPIS-G------HSSVSWYQQALGQGPQ---FI
FEYYE-K--E-ERERGN-FPGRFSGH-QFPNYSSELN------VS-ALLLGDSALYLCAS
SL-----
>V98RF-AQIA01048532.1-trbv |(3516, 3812)|2.99696400065|(1.000,1.000,0.997)|1
--PVDAGVTQSPTHLIKTRGQQVTLRCSPIS-G------HTSVYWYQQALGQGPQ---FI
FQYYE-K--E-ERERGN-FPDRFSGH-QFPNYSSELN------VS-ALLLGDSALYLCAS
SL-----
>V99RF-AQIA01048532.1-trbv |(10804, 11101)|2.97961652199|(0.985,1.000,0.996)|1
--PVNAGVTQTPKFQVLKTGQSMIVQCAQDM-K------HDYMFWYRQDPGMGLR---LI
YYSVT-A--G-ITTKGE-VPNGYNVS-RKNTEDFLLR------LE-SADPSQTSVYICAS
SE-----
>V100RF-AQIA01048532.1-trbv |(15109, 15409)|2.99899200002|(0.999,1.000,1.000)|1
--HTGAGVSQSPRYKVIKKGQDVALRCDPIS-G------HAALYWYQQALGQGPE---FL
TYFNY-K--A-QPDKSGLPNDRFSAE-RPEGSVSTLT------IQ-RTEQQDSAVYLCAS
SL-----
>V102RF-AQIA01048532.1-trbv |(34644, 34944)|2.99289600501|(0.999,0.994,1.000)|1
--HADAGVSQDPRHKITKTGQNVSFKCVPIS-E------HNRLYWYRQTLGQGPE---FL
TYFQN-E--A-QQDRSGLFSDRFSAE-RPEGSISTLM------IQ-HTEQGDSAVYLCAS
SL-----
>V103RF-AQIA01048532.1-trbv |(48704, 49001)|2.99899200002|(0.999,1.000,1.000)|1
--HMDAGITQSPRHKITETGTPVTLRCHQTE-N------HRYMYWYRQDLGNGLR---LI
HYSYG-V--E-DTDKVE-VSDGYSVS-RSKTEDFLLT------LE-SAPRSQTSVYFCAS
SE-----
>V105RF-AQIA01048532.1-trbv |(65345, 65645)|2.43177964644|(0.904,0.749,0.874)|1
--HTDAGVIQSPRHEVTEMGKEVTLRCEPIS-G------HSSLFWYRQTMMRGLE---FL
IYFNN-K--S-PIDDSGMPKDRFSAT-MPDASFSTLK------IQ-PSEPRDSAVYFCAS
SL-----
>V106RF-AQIA01048532.1-trbv |(68613, 68913)|2.63787637971|(0.927,0.840,0.903)|1
--HTDAGVIQSPRHEVTEMGKEVTLRCEPIS-G------HTYLFWYRQTMMRGLE---FL
IYFNN-K--S-PIDDSGMPKDRFSAK-MPDASFSTLK------IQ-PSEPRDSAVYFCAS
SL-----
>V107RF-AQIA01048532.1-trbv |(83967, 84267)|2.24006829526|(0.777,0.947,0.670)|1
--LIDAGVTQTPRHKVTEMGQEVTMRCQPIL-G------HNTVFWYRQTVMQGLE---LL
VYLRN-K--A-SLDDSGMPKDRFSAE-MPDASLATLK------IQ-PSEPRDSAVYLCAS
GL-----
>V111RF-AQIA01048536.1-trbv |(15427, 15724)|2.99599200002|(0.998,0.999,0.999)|1
--TMDGRITQSPKYLFRKEGQNVTLSCEQNL-N------HDAMYWYRQDPGQGLR---LI
YYSQI-V--N-DIQKGD-IAEGYSVS-RERKESFPLT------VT-SAQRNPTAFYLCAS
SI-----
>V112RF-AQIA01048536.1-trbv |(33459, 33759)|2.36310733513|(0.952,0.861,0.743)|1
--STDTKVTQRPRLLVKANKQKAKMDCVPVK-G------HSYVYWYRKKLDEELK---FL
VYFQN-E--E-IIQKAEIINKRFSAQ-CPQNSSCTLE------IQ-STESGDAALYFCAS
SK-----
>V113RF-AQIA01048536.1-trbv |(42435, 42735)|2.45578675715|(0.979,0.958,0.734)|1
--SFHAEVTQTPGYLVKGKGQKTKMDCTPEK-G------HTYVYWYQQNQNKEFT---FL
ISFQN-E--Q-VLQETELHKKRFSSQ-CPKNLPCSLE------IP-SSEPGDTALYLCAS
SQ-----
>V114RF-AQIA01048536.1-trbv |(54577, 54875)|2.9365312881|(0.994,0.999,0.951)|1
--SMDADVTQTPRNKIAKTGKRIMLECSQTK-G------HDQMYWYRQDPGLGLR---LI
YYSFD-V--Q-DINKGE-ISNGYSVS-RQEQAKFSLS------LE-SATPNQTALYFCAT
SD-----
>V115RF-AQIA01048536.1-trbv |(62410, 62707)|2.97872803289|(0.995,0.997,0.987)|1
--LTEADIYQNPRHRVIGTGKKITLECSQTV-G------HDKMYWYQQDPGMELH---LI
HYSYG-V--N-STERGD-FSSESTVS-RLRIEHFPLT------LE-SASPSHTSQYLCAS
SE-----
>V116RF-AQIA01048536.1-trbv |(103279, 103576)|2.4870581523|(0.898,1.000,0.733)|1
--PLEAQVTQNPRYLITVTGKKLTVTCSQNM-N------HEYMSWYRQDPGLGLR---QI
[truncated: 25,990 more chars]
