# Supplementary material for: Iterative Variable Gene Discovery from Whole Genome Sequencing with a Bootstrapped Multiresolution Algorithm
Source: Comput Math Methods Med. 2019 Feb 11;2019:3780245. doi: 10.1155/2019/3780245 (PMC6388353; doi:10.1155/2019/3780245)
Supplement: Supplementary Materials — supp_materialsV2.pdf: this is an updated document, which includes new figures requested by the reviewer. sequences_alignments.zip: these are genome sequence files that are relevant for reproducing some of the results. [file 3780245.f1.zip › 3780245.f1/sequences_alignments/bstrp_iteration_2_r.nwk]

(((((((((V183RF-AHZZ01084892.1-ighv:0.04680,(V6RF-JYKQ01005770.1-ighv:0.03395,V191RF-AQIA01075868.1-ighv:0.01130)0.843:0.02148)0.785:0.01251,V133RF-AQIB01153557.1-ighv:0.01269)0.937:0.03338,V108RF-AQIB01153509.1-ighv:0.03359)0.112:0.00054,(V130RF-JYKQ01245880.1-ighv:0.01095,(V227RF-AQIB01158235.1-ighv:0.02214,(V114RF-AQIB01153511.1-ighv:0.01088,(V214RF-AHZZ01096574.1-ighv:0.01091,(V134RF-JYKQ01245886.1-ighv:0.01100,V255RF-AQIA01073275.1-ighv:0.00055)0.000:0.00055)0.780:0.01113)0.983:0.05967)0.743:0.01071)0.808:0.01065)0.878:0.01583,(V112RF-ADFV01131950.1-ighv:0.05850,V8RF-ABGA01025808.1-ighv:0.07886)0.989:0.00050)0.883:0.02134,(((((V97RF-AACZ03097900.1-ighv:0.0,V6RF-AJFE01011113.1-ighv:0.0):0.04581,(V140RF-CABD02117487.1-ighv:0.02219,(V96RF-AACZ03097900.1-ighv:0.00055,(V100RF-AACZ03097906.1-ighv:0.0,V45RF-AJFE01045051.1-ighv:0.0):0.01137)0.006:0.00055)0.779:0.02535)0.786:0.01513,((V116RF-ABDC01345814.1-ighv:0.02298,V117RF-ABDC01345817.1-ighv:0.01156)0.963:0.06331,(V8RF-ABDC01231277.1-ighv:0.13017,((V11RF-ABDC01282063.1-ighv:0.08277,(V6RF-ABDC01231272.1-ighv:0.01000,V42RF-ABDC01373300.1-ighv:0.00054)0.956:0.06876)0.845:0.03836,((V93RF-JZKE01278277.1-ighv:0.06172,V100RF-JZKE01278610.1-ighv:0.05024)0.938:0.05551,(V85RF-JZKE01278253.1-ighv:0.01300,(V11RF-JZKE01244709.1-ighv:0.04577,V101RF-JZKE01278611.1-ighv:0.04696)0.838:0.02314)0.776:0.02424)0.902:0.04817)0.821:0.02943)0.722:0.01151)0.895:0.03837)0.747:0.00957,(((((((((V23RF-CABD02105615.1-trav:0.00055,V87RF-ADFV01192042.1-trav:0.01107)0.781:0.00931,((V82RF-AGCE01026522.1-trav:0.06778,V212RF-AACZ03179105.1-trav:0.01088)0.000:0.00055,V88RF-AACZ03097624.1-trav:0.00055)0.796:0.01263)0.828:0.00063,(V177RF-JABR01098595.1-trav:0.01558,V165RF-JYKQ01026655.1-trav:0.05540)0.276:0.01962)1.000:1.51110,(((V33RF-JZKE01143868.1-trav:0.04977,((((V151RF-AQIA01064166.1-trdv:0.02078,(V94RF-ADFV01192049.1-trdv:0.04210,(V220RF-ABGA01321072.1-trdv:0.02069,(V26RF-CABD02105626.1-trdv:0.01034,V59RF-AACZ03095317.1-trdv:0.00055)0.000:0.00054)0.770:0.01027)0.774:0.01044)0.000:0.00055,(((V120RF-JYKQ01135388.1-trav:0.00053,(V3RF-AHZZ01035404.1-trav:0.01022,V152RF-AQIA01064166.1-trav:0.00054)0.663:0.02035)0.759:0.01020,V196RF-AQIB01128637.1-trav:0.04323)0.433:0.02058,((V2RF-AHZZ01035404.1-trdv:0.01038,V119RF-JYKQ01135385.1-trdv:0.01043)0.000:0.00054,V195RF-AQIB01128637.1-trdv:0.03145)0.860:0.01026)0.926:0.00055)0.932:0.02011,V173RF-JABR01098592.1-trdv:0.01026)0.872:0.00054,((V78RF-AGCE01026520.1-trdv:0.07505,(V95RF-ADFV01192049.1-trav:0.01060,(V172RF-JABR01098590.1-trav:0.02119,(V60RF-AACZ03095317.1-trav:0.01015,((V27RF-CABD02105626.1-trav:0.0,V219RF-ABGA01321070.1-trav:0.0):0.00055,V114RF-AJFE01024276.1-trav:0.00055)0.000:0.00055)0.773:0.01028)0.729:0.01019)0.754:0.01052)0.842:0.02031,V77RF-AGCE01026520.1-trdv:0.03185)0.924:0.03087)0.243:0.02529)0.988:0.18741,((((V20RF-CABD02105611.1-trdv:0.04033,(V85RF-AACZ03097622.1-trdv:0.03088,((V0RF-AJFE01000016.1-trdv:0.0,V75RF-AJFE01069977.1-trdv:0.0,V85RF-AJFE01010527.1-trdv:0.0):0.03292,V209RF-AACZ03179105.1-trdv:0.00055)0.679:0.00324)0.753:0.01576)0.923:0.05137,(V44RF-JZKE01143874.1-trdv:0.10693,(V93RF-ABDC01497734.1-trdv:0.28895,V42RF-JZKE01143873.1-trdv:0.14220)0.653:0.01827)1.000:0.16370)0.850:0.03592,(V166RF-JYKQ01026663.1-trav:0.04713,(V210RF-AHZZ01093953.1-trav:0.01053,(V167RF-JYKQ01026665.1-trav:0.0,V204RF-JYKQ01066669.1-trav:0.0):0.00053)0.955:0.05304)0.429:0.01398)1.000:0.31327,(((V215RF-AQIB01128644.1-trav:0.00055,(V194RF-JABR01098600.1-trav:0.04730,((V73RF-ADFV01192039.1-trav:0.03991,(V121RF-ABGA01387831.1-trav:0.03243,(V76RF-AACZ03097618.1-trav:0.01058,(V12RF-CABD02105589.1-trav:0.02170,(V201RF-AACZ03171512.1-trav:0.0,V66RF-AJFE01069976.1-trav:0.0):0.02210)0.833:0.00054)0.737:0.02173)0.654:0.00513)0.960:0.05176,(V65RF-JYKQ01054942.1-trav:0.00054,(V59RF-AHZZ01107545.1-trav:0.01070,V134RF-AQIA01064146.1-trav:0.00055)0.929:0.02159)0.914:0.02172)0.274:0.00055)0.814:0.01834)0.972:0.11445,(V66RF-JZKE01143915.1-trdv:0.12038,(V62RF-JZKE01143910.1-trav:0.03681,(V55RF-JZKE01143896.1-trav:0.04260,(V50RF-ABDC01379531.1-trav:0.05115,V51RF-JZKE01143895.1-trav:0.03821)0.745:0.01503)0.914:0.04042)0.872:0.03299)0.591:0.03960)0.961:0.10958,(V48RF-JZKE01143891.1-trav:0.07276,(V86RF-AGCE01026527.1-trdv:0.08607,((V16RF-CABD02105598.1-trdv:0.03137,(V81RF-AACZ03097619.1-trdv:0.0,V71RF-AJFE01069976.1-trdv:0.0):0.01024)0.924:0.03335,(V118RF-ABGA01386446.1-trdv:0.06275,(V79RF-ADFV01192039.1-trdv:0.04114,(V205RF-AQIB01128643.1-trav:0.00999,(V187RF-JABR01098598.1-trav:0.03044,(V35RF-AHZZ01098200.1-trav:0.05175,(V71RF-JYKQ01054957.1-trav:0.01021,V140RF-AQIA01064149.1-trav:0.01017)0.696:0.00650)0.775:0.01455)0.787:0.01025)0.788:0.01028)0.742:0.00974)0.721:0.00848)0.777:0.03135)0.959:0.10355)1.000:0.21390)0.752:0.05442)0.803:0.03841)0.926:0.28084,((V148RF-ADFV01192057.1-trdv:0.01771,(V111RF-CABD02105639.1-trdv:0.01118,(V186RF-AACZ03095321.1-trdv:0.0,V25RF-AJFE01024273.1-trdv:0.0):0.01096)0.775:0.02724)0.995:0.98757,((((V60RF-ADFV01192035.1-trav:0.02330,(V122RF-AQIA01064137.1-trav:0.01173,(V121RF-AHZZ01044061.1-trav:0.01176,V55RF-JYKQ01054925.1-trav:0.00055)0.000:0.00054)0.764:0.01164)0.394:0.01183,(V2RF-CABD02105568.1-trav:0.02314,V146RF-ABGA01113133.1-trav:0.03550)0.931:0.00055)0.976:0.18471,(V55RF-ABDC01388284.1-trav:0.15840,((V89RF-AGCE01026530.1-trav:0.00416,(V68RF-ADFV01192037.1-trav:0.02292,((V71RF-AACZ03097613.1-trav:0.0,V61RF-AJFE01069975.1-trav:0.0):0.01156,((V192RF-JABR01098600.1-trav:0.0,V213RF-AQIB01128644.1-trav:0.0):0.00055,V132RF-AQIA01064146.1-trav:0.01163)0.902:0.02338)0.744:0.01147)0.838:0.03212)1.000:0.29176,((V60RF-JYKQ01054940.1-trav:0.02299,(V198RF-JABR01098603.1-trav:0.03446,(V84RF-AHZZ01198216.1-trav:0.00054,((V63RF-JYKQ01054942.1-trav:0.02237,(((V191RF-JABR01098600.1-trav:0.02221,V212RF-AQIB01128644.1-trav:0.02243)0.751:0.01093,V131RF-AQIA01064146.1-trav:0.00054)0.926:0.02247,V57RF-AHZZ01107544.1-trav:0.00055)0.762:0.01115)0.785:0.01168,V128RF-AQIA01064144.1-trav:0.00055)0.867:0.01120)0.767:0.01106)0.765:0.01140)0.862:0.02270,((V8RF-CABD02105586.1-trav:0.05687,(V67RF-ADFV01192037.1-trav:0.00053,V143RF-ABGA01083939.1-trav:0.07109)0.135:0.01102)0.920:0.03485,(V71RF-ADFV01192038.1-trav:0.03443,((V74RF-AACZ03097614.1-trav:0.0,V64RF-AJFE01069975.1-trav:0.0):0.05859,V137RF-ABGA01083934.1-trav:0.02263)0.081:0.00055)0.318:0.01135)0.000:0.00054)0.962:0.09887)0.771:0.03678)0.975:0.18000)0.895:0.22544,(V74RF-AGCE01026519.1-trav:0.61621,((((V128RF-ABDC01454736.1-trav:0.08069,V63RF-JZKE01143913.1-trav:0.11473)0.458:0.01154,(V58RF-JZKE01143903.1-trav:0.01156,(V74RF-ADFV01192039.1-trav:0.02267,(((V60RF-AHZZ01107545.1-trav:0.0,V66RF-JYKQ01054942.1-trav:0.0):0.00055,(V216RF-AQIB01128644.1-trav:0.00917,V135RF-AQIA01064146.1-trav:0.00466)0.907:0.00901)0.988:0.06008,(V122RF-ABGA01387833.1-trav:0.02341,(V13RF-CABD02105590.1-trav:0.00054,(V77RF-AACZ03097618.1-trav:0.0,V67RF-AJFE01069976.1-trav:0.0):0.01108)0.373:0.02298)0.703:0.02318)0.744:0.00054)0.983:0.09596)0.881:0.03887)0.737:0.01950,(V72RF-JZKE01143916.1-trav:0.13781,(V96RF-AGCE01026534.1-trav:0.14583,(((V68RF-AACZ03097613.1-trav:0.00055,V58RF-AJFE01069975.1-trav:0.01101)0.943:0.02236,(V140RF-ABGA01083939.1-trav:0.00055,(V64RF-ADFV01192035.1-trav:0.01116,V5RF-CABD02105579.1-trav:0.00055)0.830:0.01114)0.000:0.00055)0.887:0.02213,(V202RF-JABR01098604.1-trav:0.04518,((V209RF-AQIB01128644.1-trav:0.0,V57RF-JYKQ01054940.1-trav:0.0):0.02243,V125RF-AQIA01064138.1-trav:0.02267)0.619:0.00053)0.795:0.01126)0.688:0.01665)0.881:0.10912)0.831:0.09622)0.971:0.26554,(V46RF-JZKE01143890.1-trav:0.21653,(V85RF-AGCE01026527.1-trav:0.04725,(V101RF-ABDC01533415.1-trav:0.18924,(((V186RF-JABR01098598.1-trav:0.01703,((V34RF-AHZZ01098200.1-trav:0.02308,(V70RF-JYKQ01054957.1-trav:0.0,V139RF-AQIA01064149.1-trav:0.0):0.00055)0.000:0.00055,V204RF-AQIB01128643.1-trav:0.01123)0.898:0.03207)0.788:0.01894,V117RF-ABGA01386446.1-trav:0.02272)0.764:0.01515,V78RF-ADFV01192039.1-trav:0.03198)0.767:0.01090)0.736:0.01041)0.904:0.15107)0.955:0.22826)0.822:0.13963)0.565:0.12182)0.989:0.64231)0.347:0.14750)0.632:0.18010)0.565:0.07655,(((V54RF-ABDC01388284.1-trav:0.12091,((((V70RF-ADFV01192038.1-trav:0.02665,(V91RF-AGCE01026530.1-trav:0.06242,(V190RF-JABR01098600.1-trav:0.05819,(V62RF-JYKQ01054942.1-trav:0.01151,(V56RF-AHZZ01107544.1-trav:0.01141,V130RF-AQIA01064146.1-trav:0.02286)0.804:0.01150)0.540:0.00055)0.624:0.02072)0.973:0.07122)0.044:0.01255,(V10RF-CABD02105588.1-trav:0.00054,(V73RF-AACZ03097614.1-trav:0.02229,V63RF-AJFE01069975.1-trav:0.00055)0.904:0.01117)0.755:0.00809)0.963:0.08860,((V93RF-AGCE01026531.1-trav:0.02951,(((V197RF-JABR01098603.1-trav:0.0,V127RF-AQIA01064144.1-trav:0.0):0.00054,(V83RF-AHZZ01198216.1-trav:0.00055,V59RF-JYKQ01054940.1-trav:0.01017)0.911:0.00989)0.838:0.02056,(V7RF-CABD02105584.1-trav:0.00055,(V142RF-ABGA01083939.1-trav:0.02275,(V66RF-ADFV01192037.1-trav:0.02292,(V70RF-AACZ03097613.1-trav:0.0,V60RF-AJFE01069975.1-trav:0.0):0.01136)0.000:0.00054)0.492:0.02323)0.855:0.02400)0.745:0.04505)0.995:0.15931,(V87RF-AGCE01026529.1-trav:0.07925,((V75RF-ADFV01192039.1-trav:0.03405,(V14RF-CABD02105592.1-trav:0.01120,(V78RF-AACZ03097619.1-trav:0.01121,V68RF-AJFE01069976.1-trav:0.02259)0.000:0.00053)0.781:0.01127)0.766:0.01130,(V123RF-ABGA01387833.1-trav:0.05793,((V67RF-JYKQ01054942.1-trav:0.01115,((V217RF-AQIB01128644.1-trav:0.0,V136RF-AQIA01064146.1-trav:0.0):0.00055,V211RF-AQIB01128644.1-trav:0.01126)0.000:0.00055)0.390:0.00054,(V31RF-AHZZ01098200.1-trav:0.02252,V188RF-JABR01098599.1-trav:0.02262)0.791:0.01127)0.938:0.03417)0.765:0.01098)0.888:0.04027)0.976:0.09541)0.561:0.01785)0.989:0.10124,((V51RF-ABDC01379531.1-trav:0.0,V91RF-ABDC01491653.1-trav:0.0):0.09716,(V52RF-JZKE01143895.1-trav:0.05874,(V56RF-JZKE01143896.1-trav:0.02012,V57RF-JZKE01143902.1-trav:0.01159)0.549:0.00054)0.883:0.02084)0.756:0.01268)0.800:0.04610)0.997:0.41821,(((V65RF-JZKE01143915.1-trav:0.13046,(V90RF-AGCE01026530.1-trav:0.13125,((V55RF-AHZZ01107544.1-trav:0.01070,((V196RF-JABR01098601.1-trav:0.02182,V61RF-JYKQ01054942.1-trav:0.01092)0.789:0.01093,V129RF-AQIA01064146.1-trav:0.01090)1.000:0.00054)0.882:0.01973,(V138RF-ABGA01083937.1-trav:0.01258,(V72RF-AACZ03097614.1-trav:0.01100,V62RF-AJFE01069975.1-trav:0.00055)0.985:0.06743)0.438:0.01809)0.837:0.03099)0.963:0.08247)0.568:0.03113,(((V193RF-JABR01098600.1-trav:0.01081,(V133RF-AQIA01064146.1-trav:0.02152,(V64RF-JYKQ01054942.1-trav:0.01067,(V58RF-AHZZ01107544.1-trav:0.0,V214RF-AQIB01128644.1-trav:0.0):0.00055)0.000:0.00055)0.890:0.02196)0.899:0.04158,(V72RF-ADFV01192038.1-trav:0.02164,(V136RF-ABGA01083932.1-trav:0.04357,(V11RF-CABD02105589.1-trav:0.01070,V65RF-AJFE01069976.1-trav:0.00055)0.923:0.02154)0.893:0.00054)0.817:0.02643)0.995:0.13744,(V74RF-ABDC01418428.1-trav:0.15466,((V50RF-JZKE01143895.1-trav:0.00055,V61RF-JZKE01143910.1-trav:0.03311)0.702:0.03398,(V80RF-ABDC01440241.1-trav:0.09424,V54RF-JZKE01143896.1-trav:0.15489)0.489:0.03788)0.381:0.02505)0.739:0.01958)0.873:0.03909)0.949:0.14243,((V47RF-ABDC01377653.1-trav:0.12507,V70RF-JZKE01143916.1-trav:0.02467)0.787:0.10053,(V95RF-AGCE01026534.1-trav:0.17914,(V3RF-CABD02105570.1-trav:0.02219,((V65RF-AACZ03097612.1-trav:0.00054,(((V199RF-JABR01098604.1-trav:0.00054,V207RF-AQIB01128644.1-trav:0.02265)0.728:0.00054,(V123RF-AQIA01064137.1-trav:0.01141,(V80RF-AHZZ01198213.1-trav:0.00055,V56RF-JYKQ01054933.1-trav:0.01118)0.944:0.03394)0.421:0.01119)0.908:0.03471,(V61RF-ADFV01192035.1-trav:0.02264,V145RF-ABGA01113130.1-trav:0.03480)0.000:0.00055)0.847:0.01113)0.000:0.00055,V54RF-AJFE01069975.1-trav:0.01112)0.902:0.02228)0.757:0.01431)0.964:0.14489)0.835:0.12576)0.970:0.27063)0.280:0.09683,(((V4RF-AHZZ01035404.1-trav:0.00055,((V93RF-JABR01039937.1-trav:0.04787,((V96RF-ADFV01192050.1-trav:0.03631,(V218RF-ABGA01321068.1-trav:0.00055,(V28RF-CABD02105628.1-trav:0.02379,(V61RF-AACZ03095319.1-trav:0.00055,V115RF-AJFE01024276.1-trav:0.01179)0.935:0.02385)0.000:0.00054)0.847:0.00055)0.954:0.03612,V193RF-AQIB01128636.1-trav:0.02390)0.000:0.00054)0.852:0.01187,(V121RF-JYKQ01135389.1-trav:0.0,V153RF-AQIA01064166.1-trav:0.0):0.00054)0.819:0.01156)1.000:0.55630,((((((V204RF-AHZZ01093946.1-trav:0.01154,(V162RF-JYKQ01026643.1-trav:0.02182,V150RF-AQIA01064166.1-trav:0.00054)0.849:0.02129)0.976:0.06123,(((V58RF-AACZ03095314.1-trav:0.0,V113RF-AJFE01024276.1-trav:0.0):0.00055,V200RF-AACZ03171149.1-trav:0.04530)0.826:0.01149,(V221RF-ABGA01321081.1-trav:0.04391,(V93RF-ADFV01192045.1-trav:0.03301,V175RF-JABR01098593.1-trav:0.05724)0.760:0.01100)0.744:0.00997)0.664:0.00572)0.813:0.06880,(V102RF-ABDC01542818.1-trav:0.11495,V34RF-JZKE01143869.1-trav:0.01080)0.905:0.10292)0.998:0.42012,(V86RF-AACZ03097622.1-trav:0.00054,(V21RF-CABD02105612.1-trav:0.01121,V86RF-AJFE01010527.1-trav:0.01128)0.841:0.01131)0.996:0.48284)0.688:0.10121,(V80RF-AGCE01026522.1-trav:0.03262,(V80RF-ADFV01192040.1-trav:0.03594,((V43RF-JABR01080842.1-trav:0.02355,(V72RF-JYKQ01054957.1-trav:0.01952,(((V17RF-CABD02105602.1-trav:0.0,V72RF-AJFE01069977.1-trav:0.0):0.00054,V82RF-AACZ03097619.1-trav:0.01192)0.788:0.01950,(V36RF-AHZZ01098200.1-trav:0.01175,(V202RF-AQIB01128642.1-trav:0.0,V141RF-AQIA01064151.1-trav:0.0):0.00055)0.774:0.01708)0.181:0.02393)0.876:0.01642)0.967:0.00055,V183RF-JABR01098597.1-trav:0.02376)0.760:0.01189)0.867:0.04153)0.991:0.28703)0.644:0.05593,(V201RF-JABR01098604.1-trav:0.01926,(V63RF-ADFV01192035.1-trav:0.03366,(V67RF-AACZ03097613.1-trav:0.00055,V56RF-AJFE01069975.1-trav:0.01112)0.761:0.01102)0.827:0.04988)1.000:0.49692)0.623:0.10803)0.384:0.03617,(((((V100RF-ABDC01533414.1-trav:0.08414,V49RF-JZKE01143893.1-trav:0.01349)0.120:0.09909,(V84RF-AGCE01026527.1-trav:0.16403,((V185RF-JABR01098598.1-trav:0.03104,(V138RF-AQIA01064148.1-trav:0.01018,(V218RF-AQIB01128644.1-trav:0.02048,(V33RF-AHZZ01098200.1-trav:0.01027,V69RF-JYKQ01054953.1-trav:0.00055)0.000:0.00054)0.836:0.01020)0.982:0.00055)0.879:0.02133,(((V15RF-CABD02105596.1-trav:0.0,V116RF-ABGA01386446.1-trav:0.0):0.00053,(V80RF-AACZ03097619.1-trav:0.0,V70RF-AJFE01069976.1-trav:0.0):0.01034)0.790:0.00854,V77RF-ADFV01192039.1-trav:0.07505)0.750:0.01171)0.750:0.03042)0.732:0.06402)0.991:0.21551,(((V66RF-AACZ03097613.1-trav:0.0,V166RF-AACZ03171395.1-trav:0.0,V55RF-AJFE01069975.1-trav:0.0):0.02282,(V144RF-ABGA01113129.1-trav:0.03469,(V62RF-ADFV01192035.1-trav:0.01161,V4RF-CABD02105575.1-trav:0.01145)0.000:0.00054)0.195:0.00055)0.968:0.13203,(V48RF-ABDC01377655.1-trav:0.09621,V71RF-JZKE01143916.1-trav:0.02433)0.953:0.11418)0.993:0.26829)0.454:0.07229,((V176RF-JABR01098595.1-trav:0.00054,((V205RF-AHZZ01093949.1-trav:0.00994,((V22RF-CABD02105614.1-trav:0.00998,(V87RF-AACZ03097624.1-trav:0.0,V202RF-AACZ03171676.1-trav:0.0):0.00055)0.915:0.02028,V146RF-AQIA01064165.1-trav:0.01009)0.763:0.00990)0.866:0.00428,V144RF-AQIA01064159.1-trav:0.01944)0.683:0.00615)1.000:0.55142,((V208RF-AHZZ01093949.1-trav:0.03445,V148RF-AQIA01064166.1-trav:0.02295)0.716:0.00225,(V57RF-AACZ03095312.1-trav:0.01113,(V24RF-CABD02105616.1-trav:0.01138,V198RF-AACZ03171059.1-trav:0.02283)0.771:0.01202)0.928:0.06976)0.995:0.56745)0.950:0.30289)0.557:0.13094,((V203RF-AQIB01128642.1-trav:0.00053,(V184RF-JABR01098597.1-trav:0.03250,(V73RF-AJFE01069977.1-trav:0.00054,(V18RF-CABD02105602.1-trav:0.00053,V81RF-AGCE01026522.1-trav:0.06305)0.922:0.01980)0.353:0.02014)0.654:0.02100)1.000:0.53334,(V59RF-JZKE01143910.1-trav:0.06817,((V59RF-AJFE01069975.1-trav:0.01048,(V69RF-AACZ03097613.1-trav:0.00055,(V6RF-CABD02105581.1-trav:0.01044,V141RF-ABGA01083939.1-trav:0.01049)0.819:0.00055)0.000:0.00054)0.803:0.00054,((V203RF-JABR01098604.1-trav:0.01898,(((V82RF-AHZZ01198214.1-trav:0.0,V126RF-AQIA01064138.1-trav:0.0):0.00055,V210RF-AQIB01128644.1-trav:0.03129)0.805:0.01033,V58RF-JYKQ01054940.1-trav:0.01030)0.702:0.00495)0.780:0.01751,V65RF-ADFV01192037.1-trav:0.02153)0.812:0.01033)0.931:0.10175)0.995:0.33632)0.773:0.08814)0.841:0.11612)0.943:0.23238)0.957:0.32409)0.956:0.33549,(((V31RF-ADFV01062085.1-trbv:0.02277,(((V78RF-JABR01196792.1-trbv:0.02085,(V126RF-AHZZ01067647.1-trbv:0.03101,(V118RF-JYKQ01131111.1-trbv:0.03085,(V191RF-AQIB01162321.1-trbv:0.0,V118RF-AQIA01048536.1-trbv:0.0):0.00055)0.000:0.00054)0.757:0.00996)0.939:0.03110,V46RF-ABGA01091263.1-trbv:0.01027)0.108:0.00054,((V51RF-AACZ03053995.1-trbv:0.01018,V126RF-AJFE01070459.1-trbv:0.00055)0.865:0.02040,(V110RF-CABD02377030.1-trbv:0.02880,(V55RF-AACZ03067007.1-trbv:0.0,V80RF-AJFE01104369.1-trbv:0.0):0.02514)0.965:0.05064)0.766:0.01111)0.736:0.01826)0.990:1.16602,V185RF-AACZ03054006.1-trbv:1.39816)0.625:0.06865,(((V111RF-AQIA01048536.1-trbv:0.00053,((V184RF-AQIB01162321.1-trbv:0.02180,V111RF-JYKQ01131104.1-trbv:0.02130)0.789:0.01071,(V137RF-AHZZ01067649.1-trbv:0.02140,(V41RF-ABGA01091252.1-trbv:0.01120,((V100RF-CABD02352526.1-trbv:0.0,V128RF-AJFE01070460.1-trbv:0.0):0.00055,V44RF-AACZ03053991.1-trbv:0.01084)0.778:0.01075)0.951:0.03277)0.000:0.00053)0.900:0.02136)0.996:0.45460,(((V104RF-JZKE01294660.1-trbv:0.31410,(V68RF-JABR01092448.1-trbv:0.00054,(((V124RF-AHZZ01067647.1-trbv:0.01045,V116RF-JYKQ01131110.1-trbv:0.03488)0.841:0.02280,(V189RF-AQIB01162321.1-trbv:0.02204,V116RF-AQIA01048536.1-trbv:0.02156)0.375:0.00055)0.881:0.02142,(((V105RF-CABD02352531.1-trbv:0.00053,V29RF-ADFV01062084.1-trbv:0.02167)0.746:0.01101,V49RF-AACZ03053994.1-trbv:0.02194)0.000:0.00055,V159RF-ABGA01225869.1-trbv:0.03260)0.851:0.02203)0.863:0.03383)0.913:0.10941)0.943:0.18667,((V2RF-ABDC01116809.1-trbv:0.13492,V0RF-JZKE01005121.1-trbv:0.09188)0.858:0.08516,(V29RF-AGCE01062014.1-trbv:0.14678,((V190RF-AQIB01162321.1-trbv:0.02064,(V117RF-AQIA01048536.1-trbv:0.00055,V117RF-JYKQ01131110.1-trbv:0.01022)0.361:0.00055)0.883:0.01007,(V125RF-AHZZ01067647.1-trbv:0.00053,(V69RF-JABR01092448.1-trbv:0.02039,((V50RF-AACZ03053994.1-trbv:0.00055,(V106RF-CABD02352532.1-trbv:0.01071,V125RF-AJFE01070459.1-trbv:0.01063)0.770:0.01093)0.778:0.01172,(V30RF-ADFV01062084.1-trbv:0.01098,(V77RF-ABGA01224584.1-trbv:0.01015,V160RF-ABGA01225869.1-trbv:0.00055)0.935:0.03110)0.783:0.01036)0.952:0.04202)0.778:0.01027)1.000:0.00054)0.888:0.06760)0.932:0.11673)0.993:0.25389)0.656:0.02272,((((V187RF-AQIB01162321.1-trbv:0.02225,(V66RF-JABR01092448.1-trbv:0.02181,(V140RF-AHZZ01067649.1-trbv:0.04353,(V114RF-JYKQ01131107.1-trbv:0.00055,V114RF-AQIA01048536.1-trbv:0.01064)0.999:0.00054)0.784:0.01051)0.753:0.01067)0.915:0.03337,(V103RF-CABD02352529.1-trbv:0.00055,(V47RF-AACZ03053992.1-trbv:0.0,V122RF-AJFE01070459.1-trbv:0.0):0.01093)0.970:0.00055)0.620:0.01114,V44RF-ABGA01091257.1-trbv:0.02319)0.996:0.29307,(((V224RF-ABGA01349559.1-trbv:0.03657,(V109RF-CABD02377005.1-trbv:0.03420,(V54RF-AACZ03067000.1-trbv:0.0,V79RF-AJFE01104359.1-trbv:0.0):0.00054)0.250:0.02157)0.996:0.17820,((((V67RF-JABR01092448.1-trbv:0.00055,(V127RF-AHZZ01067648.1-trbv:0.00053,V115RF-JYKQ01131107.1-trbv:0.03271)0.834:0.01080)0.000:0.00054,V115RF-AQIA01048536.1-trbv:0.03295)0.000:0.00055,V188RF-AQIB01162321.1-trbv:0.01081)0.917:0.03306,(V45RF-ABGA01091260.1-trbv:0.00055,(V28RF-ADFV01062082.1-trbv:0.01093,(V123RF-AJFE01070459.1-trbv:0.00055,(V48RF-AACZ03053992.1-trbv:0.01093,V104RF-CABD02352529.1-trbv:0.01091)0.000:0.00055)0.000:0.00054)0.883:0.02177)0.898:0.03260)0.724:0.00823)1.000:0.40134,(((V74RF-JZKE01196378.1-trbv:0.08617,V106RF-JZKE01294668.1-trbv:0.10642)0.878:0.04451,((((V14RF-ADFV01062075.1-trbv:0.08659,(V163RF-AHZZ01067653.1-trbv:0.00054,V82RF-JYKQ01131090.1-trbv:0.02140)0.963:0.09812)0.472:0.06853,(V9RF-AGCE01061998.1-trbv:0.08610,V11RF-AGCE01062000.1-trbv:0.12028)0.674:0.00138)0.962:0.07704,(V19RF-AGCE01062009.1-trbv:0.12331,((((V93RF-CABD02352513.1-trbv:0.01130,V36RF-AACZ03053988.1-trbv:0.02276)0.875:0.02312,V20RF-ADFV01062075.1-trbv:0.04698)0.838:0.00055,V32RF-ABGA01091248.1-trbv:0.04534)0.430:0.01242,((V103RF-JYKQ01131101.1-trbv:0.01111,(V129RF-AHZZ01067649.1-trbv:0.01111,V103RF-AQIA01048532.1-trbv:0.01128)0.930:0.01104)1.000:0.00054,(V145RF-JABR01088213.1-trbv:0.02255,V176RF-AQIB01162320.1-trbv:0.01124)0.791:0.01121)0.881:0.03326)0.884:0.03658)0.912:0.06321)0.759:0.02802,V129RF-ABDC01455982.1-trbv:0.23402)0.351:0.03236)0.938:0.11821,((V196RF-ABGA01277806.1-trbv:0.04101,(V74RF-CABD02352498.1-trbv:0.02244,(V14RF-AACZ03053981.1-trbv:0.0,V161RF-AJFE01070464.1-trbv:0.0):0.00053)0.762:0.01624)0.998:0.26168,(V120RF-ABDC01368601.1-trbv:0.24043,(((V87RF-AQIA01048530.1-trbv:0.01100,(V84RF-JYKQ01131090.1-trbv:0.01152,(V161RF-AQIB01162317.1-trbv:0.04807,V150RF-AHZZ01067652.1-trbv:0.00055)0.000:0.00054)0.874:0.02421)0.896:0.02320,((V13RF-AGCE01062002.1-trbv:0.17117,((V95RF-AQIA01048530.1-trbv:0.05814,((V143RF-AHZZ01067651.1-trbv:0.0,V94RF-JYKQ01131093.1-trbv:0.0):0.08310,(V150RF-JABR01088214.1-trbv:0.02290,V97RF-JYKQ01131094.1-trbv:0.02382)0.884:0.02492)0.615:0.02174)0.867:0.02691,((V158RF-JABR01088215.1-trbv:0.03448,((V22RF-AACZ03053983.1-trbv:0.01194,V142RF-AJFE01070463.1-trbv:0.02297)0.899:0.02313,V80RF-CABD02352501.1-trbv:0.01113)1.000:0.00054)0.600:0.00054,(((V98RF-ABGA01301086.1-trbv:0.05648,(V31RF-AACZ03053988.1-trbv:0.0,V153RF-AJFE01070463.1-trbv:0.0):0.06943)0.952:0.00054,(((V165RF-AQIB01162318.1-trbv:0.00055,(V91RF-JYKQ01131092.1-trbv:0.06057,(V156RF-AHZZ01067652.1-trbv:0.03707,V91RF-AQIA01048530.1-trbv:0.02339)0.744:0.01424)0.883:0.03722)0.938:0.03966,(V152RF-JABR01088214.1-trbv:0.04543,((V147RF-AHZZ01067651.1-trbv:0.02334,V173RF-AQIB01162320.1-trbv:0.03499)0.199:0.01153,(V99RF-JYKQ01131096.1-trbv:0.00053,V99RF-AQIA01048532.1-trbv:0.04725)0.900:0.00054)0.850:0.02326)0.970:0.06174)0.828:0.02153,(V158RF-ABGA01223433.1-trbv:0.02279,(V150RF-AJFE01070463.1-trbv:0.06374,(V87RF-CABD02352510.1-trbv:0.03530,V28RF-AACZ03053987.1-trbv:0.00800)0.963:0.00292)0.979:0.05922)0.841:0.02175)0.524:0.01124)0.915:0.02132,(V96RF-ABGA01301083.1-trbv:0.08747,(V25RF-AACZ03053983.1-trbv:0.01125,V145RF-AJFE01070463.1-trbv:0.00055)0.746:0.01041)0.968:0.06599)0.215:0.00055)0.751:0.01087)0.765:0.01141)0.610:0.02047,(V0RF-AGCE01061995.1-trbv:0.04115,V4RF-AGCE01061995.1-trbv:0.05275)0.939:0.04275)0.761:0.00054)0.917:0.00054,((V169RF-JABR01088216.1-trbv:0.08098,V11RF-ADFV01062071.1-trbv:0.03373)0.178:0.00053,((((V72RF-CABD02352493.1-trbv:0.04650,(V9RF-AACZ03053976.1-trbv:0.01123,V162RF-AJFE01070465.1-trbv:0.00055)0.875:0.02274)0.831:0.02173,((V168RF-AHZZ01067655.1-trbv:0.0,V33RF-JYKQ01029809.1-trbv:0.0):0.01288,(V153RF-AQIB01162312.1-trbv:0.07922,(V167RF-AHZZ01067655.1-trbv:0.02220,V78RF-AQIA01048526.1-trbv:0.00055)0.702:0.00187)0.967:0.06947)0.979:0.07936)0.741:0.01513,(V202RF-ABGA01277810.1-trbv:0.08225,((V7RF-ADFV01062069.1-trbv:0.00055,(V68RF-CABD02352482.1-trbv:0.04481,(V7RF-AACZ03053974.1-trbv:0.0,V35RF-AJFE01039608.1-trbv:0.0):0.00054)0.967:0.04425)0.521:0.02180,(V8RF-ADFV01062071.1-trbv:0.06544,(V165RF-JABR01088216.1-trbv:0.01533,(V150RF-AQIB01162312.1-trbv:0.02137,(V75RF-AQIA01048526.1-trbv:0.01071,(V173RF-AHZZ01067656.1-trbv:0.01073,V30RF-JYKQ01029809.1-trbv:0.01073)0.800:0.01066)0.763:0.01082)0.908:0.05075)0.989:0.09462)0.365:0.01920)0.907:0.00054)0.796:0.01129)0.000:0.00054,(V201RF-ABGA01277810.1-trbv:0.05996,((V200RF-ABGA01277809.1-trbv:0.03336,(V69RF-CABD02352488.1-trbv:0.01145,(V12RF-AACZ03053977.1-trbv:0.0,V160RF-AJFE01070464.1-trbv:0.0):0.02354)0.853:0.02766)0.935:0.05258,V204RF-ABGA01277815.1-trbv:0.05574)0.824:0.02154)0.739:0.01172)0.624:0.01108)0.975:0.05617)0.928:0.08295)0.212:0.03297)0.967:0.18101)0.891:0.10209)0.424:0.08364)0.916:0.12413)0.868:0.09606)0.986:0.37075,(((((((V17RF-AACZ03053981.1-trbv:0.02231,V77RF-CABD02352499.1-trbv:0.02235)0.756:0.01096,V194RF-ABGA01277802.1-trbv:0.00054)0.797:0.02124,V13RF-ADFV01062075.1-trbv:0.01475)0.876:0.03605,(V37RF-JYKQ01029811.1-trbv:0.01094,((V154RF-JABR01088215.1-trbv:0.01071,V157RF-AQIB01162313.1-trbv:0.01085)1.000:0.00053,(V82RF-AQIA01048528.1-trbv:0.03462,V161RF-AHZZ01067653.1-trbv:0.00054)0.813:0.01106)0.796:0.01109)0.706:0.00626)0.985:0.23043,((V112RF-JZKE01294669.1-trbv:0.09599,(V18RF-AGCE01062008.1-trbv:0.05001,(V19RF-ADFV01062075.1-trbv:0.01568,(V92RF-CABD02352512.1-trbv:0.00055,(V35RF-AACZ03053988.1-trbv:0.0,V157RF-AJFE01070463.1-trbv:0.0):0.02200)0.933:0.04068)0.897:0.04162)0.922:0.08569)0.986:0.18068,((((((V149RF-AQIB01162312.1-trbv:0.02207,V74RF-AQIA01048525.1-trbv:0.03309)0.734:0.01136,V29RF-JYKQ01029807.1-trbv:0.03306)0.911:0.03203,(V67RF-CABD02352480.1-trbv:0.02207,(V6RF-AACZ03053974.1-trbv:0.0,V34RF-AJFE01039607.1-trbv:0.0):0.01082)0.893:0.02245)0.733:0.00054,V6RF-ADFV01062069.1-trbv:0.02222)0.545:0.02310,V205RF-ABGA01277825.1-trbv:0.03363)0.973:0.10839,(V3RF-AGCE01061995.1-trbv:0.12420,(((V193RF-ABGA01277802.1-trbv:0.00054,V195RF-ABGA01277803.1-trbv:0.02171)0.964:0.05421,(V16RF-AACZ03053981.1-trbv:0.09856,(V153RF-JABR01088215.1-trbv:0.06373,((V156RF-AQIB01162313.1-trbv:0.01076,V36RF-JYKQ01029811.1-trbv:0.00054)0.000:0.00054,(V160RF-AHZZ01067653.1-trbv:0.01079,V81RF-AQIA01048528.1-trbv:0.00055)0.938:0.03307)0.939:0.04404)0.756:0.01141)0.740:0.01011)0.917:0.06873,(((V155RF-AHZZ01067652.1-trbv:0.0,V89RF-JYKQ01131091.1-trbv:0.0,V90RF-JYKQ01131092.1-trbv:0.0):0.06755,((V149RF-JABR01088214.1-trbv:0.07790,((V97RF-AQIA01048531.1-trbv:0.01769,((V146RF-AHZZ01067651.1-trbv:0.01104,V98RF-AQIA01048532.1-trbv:0.00054)0.757:0.01552,(V172RF-AQIB01162320.1-trbv:0.00053,((V145RF-AHZZ01067651.1-trbv:0.04452,V96RF-JYKQ01131094.1-trbv:0.00055)0.944:0.03292,V98RF-JYKQ01131095.1-trbv:0.01125)0.166:0.01086)0.881:0.02886)0.472:0.02161)0.736:0.01456,(V151RF-JABR01088214.1-trbv:0.05710,(((V86RF-CABD02352509.1-trbv:0.00759,V149RF-AJFE01070463.1-trbv:0.06421)0.894:0.04248,((V149RF-AHZZ01067651.1-trbv:0.06405,(V143RF-JABR01088213.1-trbv:0.06940,(V24RF-AACZ03053983.1-trbv:0.00054,(V17RF-ADFV01062075.1-trbv:0.07895,(V82RF-CABD02352503.1-trbv:0.01071,V144RF-AJFE01070463.1-trbv:0.00054)0.000:0.00054)0.242:0.03271)0.983:0.09256)0.745:0.01348)0.753:0.00892,V175RF-AQIB01162320.1-trbv:0.06000)0.888:0.03744)0.884:0.03213,((V83RF-CABD02352508.1-trbv:0.00053,V89RF-CABD02352511.1-trbv:0.05629)0.894:0.02258,(((V146RF-AJFE01070463.1-trbv:0.00054,(V30RF-AACZ03053988.1-trbv:0.00055,V152RF-AJFE01070463.1-trbv:0.01106)0.893:0.01119)0.587:0.01105,V97RF-ABGA01301086.1-trbv:0.00055)0.817:0.00914,(V26RF-AACZ03053984.1-trbv:0.01124,V22RF-ADFV01062076.1-trbv:0.04603)0.869:0.02132)0.761:0.00279)0.865:0.02303)0.730:0.01055)0.747:0.01222)0.804:0.02354)0.060:0.00970,((V168RF-AQIB01162319.1-trbv:0.01097,(V166RF-AQIB01162319.1-trbv:0.00054,V93RF-JYKQ01131093.1-trbv:0.06587)0.755:0.03281)0.913:0.03331,((V142RF-AHZZ01067651.1-trbv:0.02207,V94RF-AQIA01048530.1-trbv:0.00055)0.935:0.04625,(V86RF-JYKQ01131090.1-trbv:0.02250,(V152RF-AHZZ01067652.1-trbv:0.02282,((V89RF-AQIA01048530.1-trbv:0.02744,(V16RF-ADFV01062075.1-trbv:0.09105,(V33RF-AACZ03053988.1-trbv:0.0,V155RF-AJFE01070463.1-trbv:0.0):0.03740)0.959:0.07399)0.780:0.01879,V163RF-AQIB01162317.1-trbv:0.02249)0.767:0.01209)0.277:0.01238)0.986:0.09402)0.730:0.01225)0.761:0.01206)0.726:0.01077)0.861:0.04011,(V15RF-AGCE01062004.1-trbv:0.0,V16RF-AGCE01062006.1-trbv:0.0):0.10921)0.938:0.08142)0.948:0.08413)0.709:0.01405)0.985:0.16358)0.721:0.03451)0.928:0.27710,(((V24RF-AGCE01062011.1-trbv:0.04658,(V63RF-JABR01092448.1-trbv:0.04509,(V99RF-CABD02352525.1-trbv:0.00053,(V43RF-AACZ03053991.1-trbv:0.0,V127RF-AJFE01070460.1-trbv:0.0):0.02219)0.515:0.03733)0.926:0.08625)0.998:0.31838,((V108RF-JZKE01294668.1-trbv:0.22443,(V62RF-JABR01092448.1-trbv:0.04299,((V183RF-AQIB01162320.1-trbv:0.01091,(V136RF-AHZZ01067649.1-trbv:0.00055,V109RF-JYKQ01131102.1-trbv:0.01083)0.898:0.02199)0.858:0.02169,(V25RF-ADFV01062079.1-trbv:0.03255,((V42RF-AACZ03053991.1-trbv:0.0,V133RF-AJFE01070461.1-trbv:0.0):0.02164,V39RF-ABGA01091249.1-trbv:0.01085)0.908:0.02194)0.738:0.01125)0.850:0.02920)0.948:0.14584)0.847:0.11779,((V138RF-ABDC01560090.1-trbv:0.12849,(V26RF-AGCE01062012.1-trbv:0.13935,((V107RF-CABD02377004.1-trbv:0.00053,(V52RF-AACZ03066999.1-trbv:0.0,V77RF-AJFE01104359.1-trbv:0.0):0.02053)0.969:0.06280,((((V112RF-AQIA01048536.1-trbv:0.02106,((V112RF-JYKQ01131104.1-trbv:0.02124,V185RF-AQIB01162321.1-trbv:0.01051)0.000:0.00055,V138RF-AHZZ01067649.1-trbv:0.01055)0.793:0.01052)0.738:0.01038,V64RF-JABR01092448.1-trbv:0.02122)0.927:0.03161,(V101RF-CABD02352526.1-trbv:0.01046,(V45RF-AACZ03053992.1-trbv:0.01053,V129RF-AJFE01070460.1-trbv:0.01062)0.785:0.01051)0.904:0.02124)0.773:0.01207,V26RF-ADFV01062081.1-trbv:0.00883)0.770:0.02441)0.838:0.02771)0.893:0.06655)0.988:0.21263,(V132RF-ABDC01473376.1-trbv:0.27615,((V102RF-CABD02352526.1-trbv:0.01067,((V46RF-AACZ03053992.1-trbv:0.00055,V130RF-AJFE01070460.1-trbv:0.01068)0.874:0.01071,V43RF-ABGA01091257.1-trbv:0.03224)0.000:0.00054)0.781:0.01778,((V65RF-JABR01092448.1-trbv:0.01060,((V113RF-AQIA01048536.1-trbv:0.00053,(V139RF-AHZZ01067649.1-trbv:0.01024,V113RF-JYKQ01131105.1-trbv:0.01030)0.797:0.01006)0.922:0.02022,V186RF-AQIB01162321.1-trbv:0.00053)0.876:0.02167)0.872:0.02914,V132RF-ABGA01047585.1-trbv:0.08427)0.139:0.01897)0.977:0.16196)0.950:0.16387)0.616:0.09093)0.973:0.22215)0.920:0.12241,((((V19RF-AACZ03053981.1-trbv:0.01080,V139RF-AJFE01070463.1-trbv:0.00055)0.917:0.06742,(((V21RF-ADFV01062075.1-trbv:0.0,V94RF-CABD02352514.1-trbv:0.0):0.00055,(V37RF-AACZ03053989.1-trbv:0.0,V134RF-AJFE01070462.1-trbv:0.0):0.01092)0.989:0.12925,(V21RF-AACZ03053983.1-trbv:0.04417,V81RF-ABGA01276890.1-trbv:0.00055)0.922:0.06454)0.810:0.03770)0.999:0.26774,((V12RF-AGCE01062000.1-trbv:0.22586,(((V180RF-AQIB01162320.1-trbv:0.01159,((V39RF-AACZ03053991.1-trbv:0.0,V131RF-AJFE01070461.1-trbv:0.0):0.06942,(V106RF-JYKQ01131102.1-trbv:0.00054,((V133RF-AHZZ01067649.1-trbv:0.0,V107RF-AQIA01048532.1-trbv:0.0):0.01127,V59RF-JABR01092448.1-trbv:0.01120)0.914:0.01070)0.322:0.02326)0.949:0.07096)0.994:0.14063,(V20RF-AGCE01062009.1-trbv:0.13119,((((V58RF-JABR01092448.1-trbv:0.01072,(V131RF-AHZZ01067649.1-trbv:0.03232,V105RF-AQIA01048532.1-trbv:0.00055)0.863:0.01074)0.889:0.00054,(((V132RF-AHZZ01067649.1-trbv:0.03338,V105RF-JYKQ01131102.1-trbv:0.03441)0.907:0.02222,V179RF-AQIB01162320.1-trbv:0.04464)0.783:0.00053,V106RF-AQIA01048532.1-trbv:0.00054)0.701:0.02208)0.897:0.02131,V178RF-AQIB01162320.1-trbv:0.00054)0.873:0.02175,(((V38RF-AACZ03053989.1-trbv:0.0,V135RF-AJFE01070462.1-trbv:0.0):0.00055,(V34RF-ABGA01091248.1-trbv:0.01294,V35RF-ABGA01091248.1-trbv:0.02329)0.984:0.07866)0.475:0.01061,(V95RF-CABD02352514.1-trbv:0.00055,V96RF-CABD02352515.1-trbv:0.01057)0.000:0.00054)0.921:0.03423)0.770:0.01820)0.380:0.01862)0.937:0.08286,(V10RF-AGCE01062000.1-trbv:0.19672,V119RF-ABDC01368596.1-trbv:0.12453)0.810:0.04989)0.875:0.07694)0.946:0.11400,((V110RF-JZKE01294669.1-trbv:0.18283,V113RF-JZKE01294672.1-trbv:0.06767)0.870:0.06086,(((V17RF-AGCE01062008.1-trbv:0.05710,((((V90RF-CABD02352511.1-trbv:0.0,V91RF-CABD02352512.1-trbv:0.0):0.00996,(V34RF-AACZ03053988.1-trbv:0.01085,V156RF-AJFE01070463.1-trbv:0.00055)0.941:0.03410)0.892:0.02389,(V189RF-ABGA01259417.1-trbv:0.01167,(V128RF-AHZZ01067649.1-trbv:0.01065,(V102RF-JYKQ01131101.1-trbv:0.02166,V102RF-AQIA01048532.1-trbv:0.00055)0.316:0.00055)0.999:0.13963)0.869:0.02281)0.778:0.01899,V18RF-ADFV01062075.1-trbv:0.05830)0.965:0.05836)0.961:0.06991,((((V169RF-AQIB01162319.1-trbv:0.06622,(V148RF-JABR01088214.1-trbv:0.06289,(V95RF-JYKQ01131094.1-trbv:0.01138,V96RF-AQIA01048531.1-trbv:0.02300)0.895:0.03050)0.392:0.01169)0.727:0.01403,(V85RF-JYKQ01131090.1-trbv:0.01924,(V151RF-AHZZ01067652.1-trbv:0.01504,V88RF-AQIA01048530.1-trbv:0.03068)0.281:0.01142)0.883:0.02850)0.774:0.01200,V93RF-ABGA01301078.1-trbv:0.05984)0.843:0.02734,(((V154RF-AHZZ01067652.1-trbv:0.00055,(V164RF-AQIB01162317.1-trbv:0.03429,V88RF-JYKQ01131090.1-trbv:0.01119)0.931:0.03435)0.921:0.04387,(V99RF-ABGA01301086.1-trbv:0.06978,(V32RF-AACZ03053988.1-trbv:0.00055,V154RF-AJFE01070463.1-trbv:0.01107)0.730:0.01075)0.930:0.03621)0.758:0.01133,(((V157RF-AHZZ01067652.1-trbv:0.04762,V92RF-AQIA01048530.1-trbv:0.01554)0.924:0.04107,(V163RF-JABR01088215.1-trbv:0.06291,((V141RF-AHZZ01067651.1-trbv:0.01372,V93RF-AQIA01048530.1-trbv:0.03272)0.354:0.02360,(((V27RF-AACZ03053986.1-trbv:0.01136,V148RF-AJFE01070463.1-trbv:0.01121)0.745:0.01134,(V88RF-CABD02352511.1-trbv:0.00055,(V151RF-AJFE01070463.1-trbv:0.01108,V29RF-AACZ03053988.1-trbv:0.01106)0.000:0.00054)0.881:0.02275)0.938:0.03608,(((V148RF-AHZZ01067651.1-trbv:0.00054,V100RF-JYKQ01131098.1-trbv:0.02285)0.857:0.01881,(V100RF-AQIA01048532.1-trbv:0.00055,V174RF-AQIB01162320.1-trbv:0.03490)0.667:0.00457)0.921:0.03392,V0RF-JABR01013263.1-trbv:0.07070)0.756:0.01055)0.875:0.03672)0.672:0.02656)0.161:0.00055)0.838:0.02788,(((V81RF-CABD02352502.1-trbv:0.0,V23RF-AACZ03053983.1-trbv:0.0,V143RF-AJFE01070463.1-trbv:0.0):0.05513,V63RF-ABGA01129113.1-trbv:0.04951)0.980:0.09651,V15RF-ADFV01062075.1-trbv:0.05665)0.724:0.02669)0.905:0.03638)0.717:0.00889)0.945:0.07265)0.810:0.07610,((((V169RF-AHZZ01067655.1-trbv:0.0,V34RF-JYKQ01029809.1-trbv:0.0,V79RF-AQIA01048527.1-trbv:0.0):0.00055,V154RF-AQIB01162312.1-trbv:0.07167)0.970:0.06448,(V197RF-ABGA01277808.1-trbv:0.06816,(V73RF-CABD02352494.1-trbv:0.08035,V13RF-AACZ03053979.1-trbv:0.00054)0.052:0.01119)0.931:0.04217)0.329:0.02687,((V75RF-CABD02352499.1-trbv:0.00060,(V15RF-AACZ03053981.1-trbv:0.00054,V136RF-AJFE01070463.1-trbv:0.01155)0.747:0.02272)0.912:0.06294,(V80RF-AQIA01048527.1-trbv:0.01139,((V35RF-JYKQ01029811.1-trbv:0.02311,V155RF-AQIB01162313.1-trbv:0.05929)0.774:0.01138,(V159RF-AHZZ01067653.1-trbv:0.04451,V207RF-JABR01184607.1-trbv:0.08575)0.645:0.00205)0.774:0.01126)0.984:0.09870)0.839:0.04547)0.972:0.13775)0.786:0.04429)0.941:0.11217)0.813:0.05460)0.845:0.08917,(((V134RF-AHZZ01067649.1-trbv:0.00053,V107RF-JYKQ01131102.1-trbv:0.03313)0.737:0.02134,((V132RF-AJFE01070461.1-trbv:0.00102,(V97RF-CABD02352520.1-trbv:0.00055,V40RF-AACZ03053991.1-trbv:0.02102)0.876:0.02078)0.979:0.08377,V21RF-AGCE01062009.1-trbv:0.11063)0.615:0.01439)0.998:0.29155,((((V73RF-JABR01095742.1-trbv:0.02253,V69RF-AQIA01048525.1-trbv:0.10143)0.281:0.01085,(V32RF-AJFE01039607.1-trbv:0.01041,(V4RF-AACZ03053974.1-trbv:0.00054,V0RF-ADFV01062069.1-trbv:0.06519)0.551:0.01093)0.947:0.04272)0.673:0.00054,V27RF-JYKQ01029807.1-trbv:0.04287)0.974:0.16350,(V113RF-ABDC01281097.1-trbv:0.07775,V118RF-JZKE01294700.1-trbv:0.13275)0.848:0.04362)0.998:0.34203)0.513:0.07056)0.916:0.12735)0.968:0.26624)0.944:0.23056,((V98RF-CABD02352520.1-trbv:0.00054,(V24RF-ADFV01062079.1-trbv:0.03376,(V41RF-AACZ03053991.1-trbv:0.03353,V38RF-ABGA01091249.1-trbv:0.01121)0.000:0.00053)0.448:0.02169)1.000:0.72415,(((V115RF-JZKE01294690.1-trbv:0.06466,((V64RF-ABDC01399103.1-trbv:0.03557,((V99RF-ABDC01527872.1-trbv:0.02521,V114RF-ABDC01281097.1-trbv:0.04293)0.900:0.04915,V111RF-ABDC01281094.1-trbv:0.01766)0.174:0.03313)0.929:0.04899,V117RF-JZKE01294699.1-trbv:0.07559)0.829:0.02152)0.968:0.08723,(V144RF-AQIB01162311.1-trbv:0.04276,((V71RF-JABR01095741.1-trbv:0.01904,((V23RF-JYKQ01029805.1-trbv:0.02082,V67RF-AQIA01048525.1-trbv:0.00054)0.934:0.02870,V238RF-AHZZ01107346.1-trbv:0.02880)0.765:0.00958)0.899:0.02980,((V4RF-ADFV01062069.1-trbv:0.06467,(V31RF-JYKQ01029809.1-trbv:0.00939,(V76RF-AQIA01048526.1-trbv:0.02877,(V165RF-AHZZ01067655.1-trbv:0.00055,(V166RF-JABR01088216.1-trbv:0.07821,V151RF-AQIB01162312.1-trbv:0.03814)0.274:0.00054)0.740:0.00054)0.796:0.03004)0.911:0.03227)0.745:0.00699,((V1RF-AGCE01061995.1-trbv:0.02003,(V198RF-ABGA01277809.1-trbv:0.02237,((V70RF-CABD02352491.1-trbv:0.0,V10RF-AACZ03053977.1-trbv:0.0,V158RF-AJFE01070464.1-trbv:0.0):0.03076,V9RF-ADFV01062071.1-trbv:0.04269)0.799:0.01856)0.920:0.03012)0.673:0.00054,(V171RF-AHZZ01067656.1-trbv:0.02037,(V147RF-AQIB01162312.1-trbv:0.04380,V72RF-AQIA01048525.1-trbv:0.00055)0.744:0.01195)0.943:0.03242)0.887:0.02016)0.809:0.01660)0.665:0.01332)0.648:0.04686)0.750:0.15864,((((V10RF-ADFV01062071.1-trbv:0.02893,V203RF-ABGA01277811.1-trbv:0.01948)0.904:0.02848,((V8RF-AACZ03053975.1-trbv:0.0,V36RF-AJFE01039609.1-trbv:0.0):0.00053,(V71RF-CABD02352492.1-trbv:0.00055,(V11RF-AACZ03053977.1-trbv:0.0,V159RF-AJFE01070464.1-trbv:0.0):0.01068)0.990:0.04926)0.458:0.01173)0.929:0.03893,(V2RF-AGCE01061995.1-trbv:0.11873,(((V166RF-AHZZ01067655.1-trbv:0.00053,V32RF-JYKQ01029809.1-trbv:0.01934)0.896:0.02903,(V152RF-AQIB01162312.1-trbv:0.00053,V77RF-AQIA01048526.1-trbv:0.02166)0.741:0.01619)0.930:0.00060,((V213RF-ABGA01277831.1-trbv:0.04881,(V5RF-ADFV01062069.1-trbv:0.00969,(V207RF-ABGA01277827.1-trbv:0.01966,((V5RF-AACZ03053974.1-trbv:0.01950,(V66RF-CABD02352480.1-trbv:0.01933,V33RF-AJFE01039607.1-trbv:0.00053)0.000:0.00055)0.840:0.00964,V1RF-ADFV01062069.1-trbv:0.01941)0.000:0.00054)0.865:0.01990)0.802:0.00999)0.838:0.02306,((V73RF-AQIA01048525.1-trbv:0.02186,((V145RF-AQIB01162312.1-trbv:0.0,V28RF-JYKQ01029807.1-trbv:0.0):0.02189,(V172RF-AHZZ01067656.1-trbv:0.01069,V148RF-AQIB01162312.1-trbv:0.00054)0.000:0.00055)0.169:0.01073)0.871:0.00055,(V72RF-JABR01095741.1-trbv:0.04355,(V68RF-AQIA01048525.1-trbv:0.04318,(V236RF-AHZZ01107345.1-trbv:0.04273,V24RF-JYKQ01029805.1-trbv:0.00055)0.707:0.02151)0.860:0.02171)0.867:0.03468)0.738:0.01933)0.996:0.12923)0.884:0.04892)0.148:0.01043)0.891:0.07072,(V109RF-ABDC01281089.1-trbv:0.19111,(V112RF-ABDC01281096.1-trbv:0.06726,V116RF-JZKE01294692.1-trbv:0.07853)0.765:0.04834)0.786:0.03736)0.984:0.25319)0.980:0.36694)0.231:0.09677)0.654:0.16263)0.807:0.13683)0.963:0.43338)0.047:0.09283,((((V9RF-JABR01052882.1-trgv:0.01049,((V2RF-JYKQ01003191.1-trgv:0.0,V64RF-AQIA01046502.1-trgv:0.0):0.03189,V1RF-AQIB01018215.1-trgv:0.02072)0.753:0.01047)0.851:0.03450,((((V2RF-AACZ03050973.1-trgv:0.02073,V29RF-AJFE01038666.1-trgv:0.00055)0.959:0.04914,((V90RF-ABGA01290202.1-trgv:0.00054,V147RF-ABGA01132346.1-trgv:0.01060)0.772:0.01104,(V27RF-AJFE01038664.1-trgv:0.00054,V163RF-CABD02337338.1-trgv:0.03140)0.110:0.02100)0.855:0.02624)0.709:0.02175,V89RF-ABGA01290201.1-trgv:0.04909)0.754:0.01557,V98RF-ADFV01046571.1-trgv:0.06656)0.908:0.05752)0.782:0.06910,(V99RF-ADFV01046573.1-trgv:0.14486,((V63RF-AQIA01046502.1-trgv:0.00054,(V1RF-AHZZ01030316.1-trgv:0.00053,(V0RF-AQIB01018214.1-trgv:0.00054,(V65RF-AQIA01046502.1-trgv:0.03156,(V2RF-AQIB01018217.1-trgv:0.05203,V1RF-JYKQ01003191.1-trgv:0.00054)0.848:0.02020)0.266:0.01042)0.830:0.03026)0.898:0.02034)0.895:0.04981,(V88RF-ABGA01290201.1-trgv:0.01458,(V165RF-CABD02337341.1-trgv:0.05476,V28RF-AJFE01038665.1-trgv:0.01016)0.953:0.05526)0.828:0.02518)0.780:0.05574)0.603:0.05858)1.000:1.65673,((((((V219RF-AQIA01017126.1-igkv:0.00055,(V43RF-AQIB01144273.1-igkv:0.08995,(V257RF-AHZZ01189922.1-igkv:0.00055,V210RF-JYKQ01076937.1-igkv:0.01131)0.759:0.01141)0.737:0.02336)0.959:0.08264,(V51RF-AQIB01144282.1-igkv:0.04693,(V255RF-AHZZ01185532.1-igkv:0.00055,V123RF-JYKQ01187326.1-igkv:0.01156)0.858:0.02325)0.977:0.09270)0.785:0.01651,(((((V44RF-CABD02196588.1-igkv:0.02229,((V51RF-AGCE01134616.1-igkv:0.03393,V54RF-AGCE01134617.1-igkv:0.03378)0.957:0.05468,V131RF-ABGA01394075.1-igkv:0.03579)0.765:0.01317)0.830:0.00055,(((V147RF-AACZ03151855.1-igkv:0.0,V21RF-AJFE01012238.1-igkv:0.0):0.03261,(V111RF-ABGA01356726.1-igkv:0.00055,(V82RF-ABGA01285645.1-igkv:0.03536,V105RF-ABGA01321410.1-igkv:0.00054)0.994:0.10330)0.603:0.04398)0.161:0.01138,((V37RF-ADFV01106193.1-igkv:0.09876,(V127RF-ABGA01394066.1-igkv:0.07584,(V144RF-AACZ03151855.1-igkv:0.00054,V17RF-AJFE01012236.1-igkv:0.02270)0.781:0.01793)0.743:0.02344)0.845:0.03339,(V86RF-ABGA01290070.1-igkv:0.03361,(V150RF-AACZ03151858.1-igkv:0.01088,V23RF-AJFE01012249.1-igkv:0.01094)0.887:0.02239)0.844:0.02251)0.809:0.00055)0.864:0.02154)0.733:0.01063,((V40RF-JABR01076265.1-igkv:0.03195,V179RF-AACZ03015562.1-igkv:0.08057)0.391:0.00062,(V85RF-ABGA01285651.1-igkv:0.04685,V215RF-ABGA01315458.1-igkv:0.00054)0.641:0.01247)0.742:0.02119)0.756:0.01800,V78RF-JYKQ01079834.1-igkv:0.09164)0.630:0.01106,(((V51RF-JYKQ01051985.1-igkv:0.04596,(V78RF-AHZZ01169213.1-igkv:0.02251,V240RF-AHZZ01107395.1-igkv:0.03407)0.736:0.01109)0.890:0.00055,(((V76RF-AHZZ01143621.1-igkv:0.0,V245RF-AHZZ01111138.1-igkv:0.0,V248RF-AHZZ01111367.1-igkv:0.0):0.02312,V48RF-AQIB01144276.1-igkv:0.01091)0.877:0.02336,(V64RF-AHZZ01109398.1-igkv:0.00054,(V36RF-JABR01076263.1-igkv:0.05779,V222RF-AQIA01017128.1-igkv:0.00055)0.440:0.02243)0.884:0.04415)0.271:0.02252)0.814:0.02259,((V71RF-AHZZ01117754.1-igkv:0.01566,V37RF-AQIB01144269.1-igkv:0.05704)0.997:0.11943,((V94RF-JABR01041956.1-igkv:0.06610,(V220RF-AQIB01144282.1-igkv:0.00055,(V245RF-JYKQ01187338.1-igkv:0.03344,(V85RF-AHZZ01040804.1-igkv:0.01108,V57RF-AQIA01017139.1-igkv:0.00054)0.000:0.00054)0.827:0.01110)0.863:0.03043)0.991:0.10419,((((V228RF-AQIA01017135.1-igkv:0.04593,V256RF-AQIA01075132.1-igkv:0.01143)0.734:0.01089,(V31RF-JABR01076261.1-igkv:0.03364,((V235RF-AHZZ01106331.1-igkv:0.00054,(V216RF-AQIA01017123.1-igkv:0.03485,V141RF-JYKQ01005004.1-igkv:0.00053)0.881:0.01110)0.741:0.01953,V40RF-AQIB01144273.1-igkv:0.04919)0.815:0.04617)0.897:0.04009)0.773:0.02290,(((V210RF-AQIA01017120.1-igkv:0.00054,((V147RF-JYKQ01005018.1-igkv:0.0,V149RF-JYKQ01005019.1-igkv:0.0):0.02295,((V153RF-JYKQ01005032.1-igkv:0.02140,V204RF-AQIA01017118.1-igkv:0.00054)0.881:0.02132,((V33RF-ADFV01106193.1-igkv:0.07322,V26RF-JABR01076261.1-igkv:0.03420)0.739:0.00941,(V45RF-AHZZ01104241.1-igkv:0.02131,V28RF-AQIB01144264.1-igkv:0.03428)0.888:0.00054)0.778:0.01088)0.928:0.03328)0.828:0.02270)0.946:0.00054,(V224RF-AQIA01017128.1-igkv:0.02270,V222RF-AHZZ01104243.1-igkv:0.04456)0.861:0.02120)0.318:0.02265,(V38RF-JABR01076263.1-igkv:0.02221,V142RF-JYKQ01005007.1-igkv:0.00055)0.759:0.01064)0.670:0.02206)0.919:0.00053,(V70RF-AHZZ01117754.1-igkv:0.0,V35RF-AQIB01144265.1-igkv:0.0):0.00054)0.951:0.00055)0.820:0.01250)0.832:0.02274)0.765:0.01677)0.723:0.01229)0.995:0.18351,((V39RF-AGCE01134602.1-igkv:0.07130,((V29RF-ABDC01351835.1-igkv:0.03940,((V40RF-CABD02196577.1-igkv:0.06406,V18RF-AJFE01012238.1-igkv:0.02997)0.959:0.05267,(((V17RF-AQIB01144247.1-igkv:0.01035,(V180RF-JYKQ01052440.1-igkv:0.02038,((V54RF-AQIA01017115.1-igkv:0.00053,(V97RF-AHZZ01042080.1-igkv:0.00053,(V16RF-AQIB01144244.1-igkv:0.01065,V178RF-JYKQ01052440.1-igkv:0.01034)0.883:0.02101)0.844:0.01025)0.000:0.00054,V52RF-AQIA01017115.1-igkv:0.02061)0.962:0.00053)0.886:0.01007)0.835:0.01015,V7RF-JZKE01218269.1-igkv:0.04256)0.274:0.00054,((V97RF-ABDC01523330.1-igkv:0.05160,(V118RF-ABDC01358932.1-igkv:0.08082,V35RF-ABDC01360510.1-igkv:0.06777)0.886:0.00053)0.785:0.01001,(V137RF-ADFV01132961.1-igkv:0.02547,V125RF-ABGA01394062.1-igkv:0.05923)0.901:0.03709)0.819:0.01009)0.902:0.03099)0.957:0.00055)0.842:0.01821,((V43RF-AGCE01134604.1-igkv:0.02089,(V185RF-ABGA01257764.1-igkv:0.03871,(V139RF-ADFV01132961.1-igkv:0.03593,((V102RF-JABR01067077.1-igkv:0.06212,((((V34RF-AGCE01134600.1-igkv:0.02431,V44RF-AGCE01134604.1-igkv:0.11213)0.909:0.06108,(V20RF-AQIB01144258.1-igkv:0.05915,((V202RF-AQIA01017118.1-igkv:0.01154,(V43RF-AHZZ01104241.1-igkv:0.01092,(V24RF-JABR01076260.1-igkv:0.0,V25RF-AQIB01144263.1-igkv:0.0,V26RF-AQIB01144264.1-igkv:0.0):0.00055)0.924:0.03298)0.940:0.04756,(((((((V156RF-CABD02196545.1-igkv:0.04610,(V142RF-AACZ03151853.1-igkv:0.0,V15RF-AJFE01012235.1-igkv:0.0):0.03394)0.940:0.04718,(V138RF-AACZ03151853.1-igkv:0.00055,V12RF-AJFE01012234.1-igkv:0.01020)0.792:0.01111)0.932:0.03532,(V158RF-JYKQ01005048.1-igkv:0.02191,V175RF-JYKQ01052437.1-igkv:0.05877)0.405:0.01519)0.852:0.02858,(V228RF-AQIB01159121.1-igkv:0.00054,V198RF-AQIA01017118.1-igkv:0.04496)0.775:0.01060)0.572:0.01024,V93RF-AHZZ01042078.1-igkv:0.03133)0.876:0.02185,V101RF-JABR01064858.1-igkv:0.02170)0.812:0.00986,((V22RF-AQIB01144263.1-igkv:0.02239,(V141RF-ADFV01132961.1-igkv:0.03451,(V197RF-AQIA01017118.1-igkv:0.01094,(V176RF-JYKQ01052439.1-igkv:0.04307,V21RF-AQIB01144263.1-igkv:0.04002)0.748:0.01098)0.805:0.01200)0.643:0.00053)0.938:0.02795,(V157RF-CABD02196547.1-igkv:0.04472,V155RF-ABGA01199503.1-igkv:0.01090)0.777:0.01122)0.945:0.00054)0.227:0.01793)0.835:0.01921)0.723:0.01180)0.792:0.02257,(V83RF-ABDC01446518.1-igkv:0.05646,((V31RF-ABDC01351837.1-igkv:0.04195,V60RF-ABDC01394567.1-igkv:0.06012)0.056:0.01005,((V6RF-JZKE01218259.1-igkv:0.03024,V31RF-JZKE01296733.1-igkv:0.02164)0.951:0.05408,V139RF-ABDC01562688.1-igkv:0.02412)0.838:0.02568)0.905:0.04494)0.898:0.05461)0.953:0.06651,V56RF-AQIA01017115.1-igkv:0.04746)0.141:0.01099)0.297:0.01200,V40RF-AGCE01134603.1-igkv:0.07151)0.792:0.01237)0.702:0.00593)0.411:0.00945)0.775:0.01204,(((V160RF-CABD02196559.1-igkv:0.04221,(((V44RF-JABR01088351.1-igkv:0.01991,(V39RF-AQIA01017097.1-igkv:0.00992,(V109RF-AHZZ01042093.1-igkv:0.00986,V188RF-JYKQ01052444.1-igkv:0.00055)0.878:0.02017)0.865:0.01970)0.783:0.00984,(((V135RF-ADFV01132961.1-igkv:0.11961,V100RF-AHZZ01042083.1-igkv:0.08820)0.211:0.00881,V8RF-AJFE01012232.1-igkv:0.03512)0.866:0.03956,V120RF-AHZZ01042094.1-igkv:0.06907)0.699:0.00561)0.000:0.00054,(((V53RF-JYKQ01052451.1-igkv:0.02690,(V10RF-AHZZ01042101.1-igkv:0.02699,V195RF-AQIA01017094.1-igkv:0.02243)0.471:0.01002)0.881:0.02191,V4RF-AQIB01144236.1-igkv:0.00929)1.000:0.00054,(V40RF-AQIA01017097.1-igkv:0.05208,V111RF-AHZZ01042093.1-igkv:0.00055)0.810:0.00974)0.718:0.01001)0.972:0.00059)0.725:0.02367,((V35RF-AGCE01134600.1-igkv:0.11639,(V133RF-AACZ03151853.1-igkv:0.01971,V84RF-AJFE01003455.1-igkv:0.00978)0.891:0.01944)0.226:0.00055,((V188RF-ABGA01257777.1-igkv:0.00990,V223RF-ABGA01322683.1-igkv:0.03111)0.784:0.03010,(((((V31RF-AGCE01134597.1-igkv:0.04950,(V46RF-AGCE01134609.1-igkv:0.10620,(V23RF-AQIB01144263.1-igkv:0.04332,(V42RF-AQIA01017097.1-igkv:0.03091,(V113RF-AHZZ01042093.1-igkv:0.00054,V9RF-AHZZ01042101.1-igkv:0.03267)0.702:0.02235)0.937:0.04688)0.016:0.01015)0.818:0.02546)0.773:0.01565,((((V102RF-AHZZ01042085.1-igkv:0.01010,V193RF-JYKQ01052444.1-igkv:0.04282)0.417:0.01037,(V48RF-AQIA01017100.1-igkv:0.02095,(V12RF-AQIB01144242.1-igkv:0.02012,V187RF-JYKQ01052443.1-igkv:0.02157)0.768:0.01019)0.591:0.00055)0.831:0.01917,(V105RF-AHZZ01042091.1-igkv:0.02533,(V141RF-AQIB01158310.1-igkv:0.02476,V46RF-AQIA01017099.1-igkv:0.02091)0.755:0.01060)0.761:0.01095)0.757:0.01615,((V10RF-AQIB01144242.1-igkv:0.03173,((((V28RF-ABDC01351832.1-igkv:0.03987,((V38RF-ABDC01360666.1-igkv:0.03162,(V37RF-ABDC01360510.1-igkv:0.02150,(V61RF-ABDC01396012.1-igkv:0.04179,V5RF-JZKE01218259.1-igkv:0.03970)0.874:0.02405)0.755:0.00924)0.877:0.02244,V106RF-ABDC01583217.1-igkv:0.00054)0.668:0.00384)0.955:0.04283,V41RF-AGCE01134603.1-igkv:0.03217)0.773:0.01069,(V142RF-ADFV01132961.1-igkv:0.06514,V9RF-AQIB01144240.1-igkv:0.05510)0.884:0.00057)0.736:0.00780,(V108RF-AHZZ01042093.1-igkv:0.01275,V46RF-JABR01088351.1-igkv:0.14834)0.965:0.07608)0.718:0.00504)0.000:0.00054,((V13RF-AQIB01144243.1-igkv:0.04350,(V119RF-AQIA01058132.1-igkv:0.00055,(V185RF-JYKQ01052442.1-igkv:0.00053,V103RF-AHZZ01042085.1-igkv:0.03145)0.933:0.00993)0.783:0.01014)0.866:0.02093,(V39RF-CABD02196568.1-igkv:0.01057,(V139RF-AACZ03151853.1-igkv:0.01011,V13RF-AJFE01012234.1-igkv:0.00054)0.916:0.03184)0.922:0.03106)0.901:0.02173)0.764:0.01503)0.694:0.02163)0.790:0.02051,((((V199RF-AQIA01017118.1-igkv:0.03114,(V94RF-AHZZ01042078.1-igkv:0.00055,V157RF-JYKQ01005045.1-igkv:0.01021)0.876:0.00055)0.931:0.04314,(V53RF-AQIA01017115.1-igkv:0.03160,(V98RF-AHZZ01042080.1-igkv:0.02000,V179RF-JYKQ01052440.1-igkv:0.00997)0.000:0.00055)0.908:0.03938)0.921:0.03450,V47RF-JABR01088351.1-igkv:0.01393)0.805:0.02171,(((V116RF-AHZZ01042093.1-igkv:0.04881,V8RF-AQIB01144237.1-igkv:0.04077)0.907:0.03707,((V23RF-JABR01076259.1-igkv:0.06005,(V91RF-AHZZ01042077.1-igkv:0.00989,V200RF-AQIA01017118.1-igkv:0.00055)0.759:0.01178)0.873:0.01984,(V143RF-ADFV01132961.1-igkv:0.04015,((V140RF-AACZ03151853.1-igkv:0.0,V14RF-AJFE01012234.1-igkv:0.0):0.01951,V124RF-ABGA01394059.1-igkv:0.01956)0.769:0.00985)0.774:0.00974)0.804:0.00989)1.000:0.00054,(V195RF-JYKQ01052451.1-igkv:0.02051,(V45RF-AQIA01017097.1-igkv:0.03517,(V191RF-JYKQ01052444.1-igkv:0.03899,V36RF-AQIA01017094.1-igkv:0.03365)0.554:0.01039)0.749:0.01592)0.789:0.00940)0.667:0.01597)0.816:0.02005)0.802:0.01800,(V36RF-AGCE01134600.1-igkv:0.01998,(V134RF-ADFV01132961.1-igkv:0.04292,V101RF-ADFV01106214.1-igkv:0.05230)0.912:0.00055)0.772:0.01225)0.815:0.02478,(V118RF-AACZ03126842.1-igkv:0.00955,(V75RF-ABGA01197604.1-igkv:0.01933,V81RF-AJFE01000028.1-igkv:0.00053)0.000:0.00054)0.961:0.03972)0.498:0.00055)0.838:0.00973)0.779:0.01620)0.945:0.04920,(V118RF-AHZZ01042093.1-igkv:0.04403,(V8RF-AHZZ01042100.1-igkv:0.01932,(V5RF-AQIB01144237.1-igkv:0.07517,(V112RF-AHZZ01042093.1-igkv:0.00996,V52RF-JYKQ01052451.1-igkv:0.02878)0.773:0.00969)0.852:0.01994)0.953:0.04963)0.738:0.01242)0.778:0.01108)0.755:0.00665)0.721:0.00890)1.000:0.23716,(V32RF-JZKE01097728.1-igkv:0.05342,(V106RF-AGCE01134619.1-igkv:0.12609,((V5RF-JABR01020048.1-igkv:0.00959,((V89RF-AHZZ01040808.1-igkv:0.00951,(V222RF-AQIB01144284.1-igkv:0.01876,V246RF-JYKQ01187347.1-igkv:0.00054)0.794:0.00927)0.890:0.01938,V61RF-AQIA01017150.1-igkv:0.00054)0.771:0.00955)0.896:0.01930,(V100RF-ADFV01106195.1-igkv:0.02007,(V35RF-CABD02196505.1-igkv:0.00961,(V0RF-AACZ03015560.1-igkv:0.04732,V64RF-ABGA01154382.1-igkv:0.02834)0.763:0.01193)0.364:0.00945)0.782:0.00977)0.683:0.01144)0.570:0.03759)0.970:0.14286)0.743:0.04995)0.410:0.01786,(((V148RF-ABGA01154384.1-igkv:0.03283,((V52RF-AQIB01144282.1-igkv:0.04365,V6RF-AHZZ01040804.1-igkv:0.01924)0.840:0.02274,((V177RF-AACZ03015561.1-igkv:0.03233,(V150RF-CABD02196508.1-igkv:0.05221,V24RF-AJFE01016082.1-igkv:0.02046)0.373:0.00053)0.588:0.02030,(V85RF-JABR01032523.1-igkv:0.03121,V229RF-AQIA01017139.1-igkv:0.02061)0.833:0.01028)0.789:0.00055)0.649:0.03283)0.998:0.23897,(V124RF-JYKQ01187337.1-igkv:0.00055,(V7RF-AHZZ01040804.1-igkv:0.00053,(V230RF-AQIA01017139.1-igkv:0.02159,V53RF-AQIB01144282.1-igkv:0.03316)0.868:0.00054)0.827:0.01074)0.994:0.20291)0.880:0.08005,((V107RF-AGCE01134619.1-igkv:0.46389,((V88RF-AHZZ01040807.1-igkv:0.01089,(V219RF-AQIB01144282.1-igkv:0.04490,V59RF-AQIA01017140.1-igkv:0.01101)0.900:0.00054)0.965:0.11328,((((V38RF-CABD02196563.1-igkv:0.01099,(V109RF-ABGA01356722.1-igkv:0.12993,V149RF-AACZ03151857.1-igkv:0.03157)0.758:0.01337)0.772:0.03275,(V83RF-ABGA01285648.1-igkv:0.05851,(V38RF-AGCE01134600.1-igkv:0.09922,(V130RF-ABGA01394071.1-igkv:0.05424,V103RF-ABGA01318850.1-igkv:0.06966)0.519:0.03506)0.760:0.01235)0.602:0.01335)0.710:0.01268,((((((((V119RF-AHZZ01042093.1-igkv:0.04614,V47RF-AQIA01017099.1-igkv:0.05507)0.862:0.04068,(V49RF-JABR01088351.1-igkv:0.04321,(V96RF-AHZZ01042080.1-igkv:0.02338,V15RF-AQIB01144243.1-igkv:0.02097)0.720:0.02476)0.299:0.01500)0.945:0.05968,(V32RF-AQIB01144265.1-igkv:0.02166,(V28RF-JABR01076261.1-igkv:0.04092,(V49RF-AHZZ01104243.1-igkv:0.00054,(V152RF-JYKQ01005027.1-igkv:0.02223,V207RF-AQIA01017120.1-igkv:0.01096)0.783:0.01071)0.855:0.02091)0.796:0.02524)0.871:0.02253)0.857:0.02120,V181RF-AACZ03015564.1-igkv:0.04368)0.872:0.02193,((V208RF-JYKQ01076937.1-igkv:0.03442,((V58RF-ADFV01138112.1-igkv:0.03767,(V37RF-AGCE01134600.1-igkv:0.10411,V102RF-ADFV01106214.1-igkv:0.02343)0.753:0.01691)0.860:0.02673,((V117RF-AHZZ01042093.1-igkv:0.04054,(((((((V183RF-AACZ03016034.1-igkv:0.01023,V197RF-AACZ03151911.1-igkv:0.02050)0.480:0.00054,(V56RF-AACZ03070936.1-igkv:0.01024,(V161RF-CABD02196901.1-igkv:0.01032,(V166RF-CABD02379427.1-igkv:0.00055,V167RF-CABD02379503.1-igkv:0.01027)0.000:0.00055)0.746:0.00054)0.350:0.01025)0.815:0.01021,V119RF-AACZ03126842.1-igkv:0.01027)0.000:0.00055,V208RF-AACZ03179013.1-igkv:0.00055)0.000:0.00055,((V196RF-AACZ03151873.1-igkv:0.00055,V214RF-AACZ03183442.1-igkv:0.01039)0.936:0.03115,V213RF-AACZ03179806.1-igkv:0.01039)0.906:0.00054)0.873:0.00054,V207RF-AACZ03178854.1-igkv:0.02048)0.861:0.00054,V0RF-CABD02043817.1-igkv:0.02025)0.763:0.02579)0.877:0.03206,(V192RF-JYKQ01052444.1-igkv:0.02268,(V184RF-JYKQ01052441.1-igkv:0.02208,(V48RF-JABR01088351.1-igkv:0.04415,((V49RF-AQIA01017105.1-igkv:0.0,V120RF-AQIA01058133.1-igkv:0.0):0.02185,(V99RF-AHZZ01042083.1-igkv:0.08174,(V104RF-AHZZ01042085.1-igkv:0.00055,(V50RF-JABR01088351.1-igkv:0.03238,V14RF-AQIB01144243.1-igkv:0.00054)0.840:0.01079)0.000:0.00054)0.838:0.01079)0.852:0.00054)0.893:0.02260)0.920:0.03399)0.783:0.01107)0.762:0.01114)0.782:0.01101)0.788:0.01091,((V41RF-AQIB01144273.1-igkv:0.04603,(((V141RF-AACZ03151853.1-igkv:0.01821,(V107RF-ABGA01342015.1-igkv:0.00054,(V144RF-ADFV01132961.1-igkv:0.03338,((V24RF-AQIB01144263.1-igkv:0.03210,(V90RF-AHZZ01042076.1-igkv:0.00055,(V201RF-AQIA01017118.1-igkv:0.02146,V156RF-JYKQ01005040.1-igkv:0.01060)0.762:0.00055)0.000:0.00054)0.974:0.07119,V42RF-AGCE01134604.1-igkv:0.03577)0.602:0.01124)0.738:0.01059)0.791:0.01480)0.934:0.06046,((V37RF-CABD02196554.1-igkv:0.01046,V158RF-CABD02196553.1-igkv:0.00055)0.867:0.02244,(V136RF-AACZ03151853.1-igkv:0.01078,V10RF-AJFE01012232.1-igkv:0.02138)0.802:0.02255)0.909:0.05012)0.429:0.04036,((V177RF-JYKQ01052440.1-igkv:0.01081,(V101RF-AHZZ01042084.1-igkv:0.02193,V50RF-AQIA01017109.1-igkv:0.00053)0.541:0.02275)0.927:0.04565,(V194RF-AQIA01007908.1-igkv:0.01111,(V11RF-AQIB01144242.1-igkv:0.02187,V186RF-JYKQ01052443.1-igkv:0.02222)0.030:0.01084)0.994:0.08696)0.656:0.00054)0.921:0.01063)0.770:0.01095,(V215RF-AQIA01017123.1-igkv:0.02243,(((V136RF-ADFV01132961.1-igkv:0.07230,(V51RF-JABR01088351.1-igkv:0.04696,V51RF-AQIA01017115.1-igkv:0.09229)0.741:0.01084)0.757:0.01047,(V135RF-AACZ03151853.1-igkv:0.02258,V9RF-AJFE01012232.1-igkv:0.01110)0.775:0.00219)0.783:0.01095,V159RF-CABD02196556.1-igkv:0.01114)0.930:0.03426)0.769:0.01051)0.000:0.00055)0.754:0.01126)0.768:0.01131,(((((V133RF-ADFV01132961.1-igkv:0.14292,((V115RF-AHZZ01042093.1-igkv:0.03306,(V190RF-JYKQ01052444.1-igkv:0.01077,V7RF-AQIB01144237.1-igkv:0.05616)0.028:0.01108)0.915:0.00055,V44RF-AQIA01017097.1-igkv:0.02187)0.821:0.04180)0.839:0.02823,((V3RF-AQIB01144236.1-igkv:0.01077,(V37RF-AQIA01017096.1-igkv:0.03233,(V45RF-JABR01088351.1-igkv:0.00055,(V107RF-AHZZ01042093.1-igkv:0.01062,V194RF-JYKQ01052450.1-igkv:0.00053)0.721:0.02167)0.803:0.01060)0.764:0.01076)0.761:0.01598,(V132RF-ADFV01132961.1-igkv:0.04181,(V187RF-ABGA01257772.1-igkv:0.01069,(V47RF-CABD02199693.1-igkv:0.01061,(V182RF-AACZ03015754.1-igkv:0.01094,V7RF-AJFE01011588.1-igkv:0.01099)0.900:0.02230)0.791:0.01070)0.774:0.01223)0.699:0.01805)0.432:0.02014)0.855:0.03011,(((V34RF-ADFV01106193.1-igkv:0.02007,(V29RF-AQIB01144264.1-igkv:0.03317,(V46RF-AHZZ01104241.1-igkv:0.00055,(V27RF-JABR01076261.1-igkv:0.05596,V205RF-AQIA01017118.1-igkv:0.01076)0.000:0.00055)0.000:0.00055)0.965:0.05785)0.999:0.13800,(V184RF-AACZ03016143.1-igkv:0.14001,V76RF-ABGA01198108.1-igkv:0.07727)0.970:0.07810)0.642:0.00253,V33RF-AGCE01134599.1-igkv:0.04542)0.797:0.01123)0.869:0.02318,V32RF-AGCE01134598.1-igkv:0.15468)0.734:0.01419,(V152RF-CABD02196515.1-igkv:0.02250,(V82RF-AJFE01002289.1-igkv:0.00055,V180RF-AACZ03015562.1-igkv:0.01114)0.000:0.00055)0.951:0.05246)0.873:0.02323)0.791:0.01112,(((V48RF-AGCE01134612.1-igkv:0.01140,V49RF-AGCE01134613.1-igkv:0.01080)0.982:0.05561,((((V196RF-AQIA01017118.1-igkv:0.00054,(V92RF-AHZZ01042078.1-igkv:0.01084,V183RF-JYKQ01052440.1-igkv:0.04245)0.961:0.05537)0.921:0.02174,V98RF-JABR01061517.1-igkv:0.04425)0.000:0.00054,V19RF-AQIB01144257.1-igkv:0.01101)0.897:0.03488,(V138RF-ADFV01132961.1-igkv:0.13515,(V18RF-AQIB01144251.1-igkv:0.03403,((V181RF-JYKQ01052440.1-igkv:0.01070,(V11RF-AJFE01012232.1-igkv:0.05815,(V140RF-ADFV01132961.1-igkv:0.04475,V150RF-ABGA01161530.1-igkv:0.02177)0.735:0.01139)0.881:0.02202)0.618:0.02283,V55RF-AQIA01017115.1-igkv:0.00055)0.937:0.03420)0.761:0.01160)0.654:0.02269)0.966:0.06805)0.797:0.00055,((V178RF-AACZ03015562.1-igkv:0.0,V121RF-AJFE01047586.1-igkv:0.0):0.04412,V129RF-ABGA01394068.1-igkv:0.01916)0.614:0.00362)0.927:0.02240)0.000:0.00055,(((V42RF-AQIB01144273.1-igkv:0.03260,((V54RF-AHZZ01105091.1-igkv:0.02271,V50RF-JYKQ01051984.1-igkv:0.08876)0.899:0.03260,V47RF-AGCE01134610.1-igkv:0.10839)0.708:0.01278)0.854:0.00054,V84RF-ABGA01285649.1-igkv:0.04324)0.853:0.01079,((V38RF-ADFV01106195.1-igkv:0.03288,(((V146RF-AACZ03151855.1-igkv:0.00054,(V39RF-ADFV01106195.1-igkv:0.02280,V149RF-ABGA01154386.1-igkv:0.06965)0.915:0.00055)0.781:0.01089,(V153RF-ABGA01180644.1-igkv:0.03307,(V214RF-AQIA01017123.1-igkv:0.00053,(V233RF-AHZZ01106331.1-igkv:0.00055,V144RF-JYKQ01005013.1-igkv:0.01078)0.924:0.01107)0.929:0.03354)0.875:0.02237)0.794:0.01091,(((V46RF-CABD02196595.1-igkv:0.0,V83RF-AJFE01002352.1-igkv:0.0):0.07926,(V43RF-CABD02196587.1-igkv:0.04532,V151RF-AACZ03151858.1-igkv:0.02208)0.769:0.01128)0.189:0.01089,(((V176RF-AACZ03015561.1-igkv:0.04050,(V151RF-CABD02196513.1-igkv:0.02743,V153RF-AACZ03151979.1-igkv:0.03011)0.397:0.01143)0.937:0.03745,((V50RF-AHZZ01104243.1-igkv:0.0,V151RF-JYKQ01005026.1-igkv:0.0,V208RF-AQIA01017120.1-igkv:0.0):0.00055,V33RF-AQIB01144265.1-igkv:0.01144)0.882:0.02403)0.759:0.02157,(V112RF-ABGA01356729.1-igkv:0.02173,((((((V35RF-JABR01076263.1-igkv:0.00055,(V32RF-JABR01076261.1-igkv:0.06053,V40RF-ADFV01106195.1-igkv:0.02345)0.881:0.03173)0.889:0.02160,(((V50RF-AGCE01134614.1-igkv:0.04350,V53RF-AGCE01134616.1-igkv:0.00054)0.871:0.03355,(V37RF-JABR01076263.1-igkv:0.00054,(V256RF-AHZZ01189918.1-igkv:0.01124,V207RF-JYKQ01076935.1-igkv:0.01072)0.985:0.05651)0.875:0.02158)0.772:0.01098,V42RF-JABR01076266.1-igkv:0.02234)0.888:0.02241)0.741:0.01051,V49RF-AQIB01144276.1-igkv:0.01105)0.774:0.01086,(V41RF-JABR01076266.1-igkv:0.02217,V50RF-AQIB01144276.1-igkv:0.03244)0.899:0.00053)0.829:0.01094,((V249RF-AHZZ01111367.1-igkv:0.01086,((V241RF-AHZZ01107399.1-igkv:0.00055,V174RF-JYKQ01044662.1-igkv:0.01099)0.967:0.03308,V206RF-JYKQ01075085.1-igkv:0.03299)0.000:0.00053)0.000:0.00055,V246RF-AHZZ01111138.1-igkv:0.02185)0.781:0.01089)0.933:0.03282,((((V62RF-AHZZ01109397.1-igkv:0.03480,V145RF-JYKQ01005014.1-igkv:0.01079)0.000:0.00054,(V38RF-AQIB01144269.1-igkv:0.02248,(V232RF-AHZZ01106331.1-igkv:0.00055,(V217RF-AQIA01017125.1-igkv:0.00054,V213RF-AQIA01017123.1-igkv:0.02213)0.917:0.02191)0.000:0.00055)0.187:0.01082)0.888:0.02246,V223RF-AQIA01017128.1-igkv:0.01027)0.712:0.02224,(V108RF-ABGA01356721.1-igkv:0.01083,(((V39RF-JABR01076264.1-igkv:0.05537,(V243RF-AHZZ01110488.1-igkv:0.01202,(((V45RF-AQIB01144274.1-igkv:0.02171,(V212RF-JYKQ01081225.1-igkv:0.03151,(V63RF-AHZZ01109397.1-igkv:0.01097,(V48RF-JYKQ01051981.1-igkv:0.00055,V221RF-AQIA01017128.1-igkv:0.03373)0.000:0.00053)0.938:0.04522)0.884:0.02921)0.812:0.01741,((V172RF-JYKQ01044654.1-igkv:0.01079,(V225RF-AQIA01017130.1-igkv:0.04665,V226RF-AQIA01017133.1-igkv:0.00053)0.909:0.01056)0.806:0.01083,(V79RF-AHZZ01176978.1-igkv:0.02173,(V244RF-AHZZ01111138.1-igkv:0.0,V247RF-AHZZ01111367.1-igkv:0.0):0.00053)0.863:0.01076)0.864:0.00054)0.890:0.02191,V47RF-AQIB01144276.1-igkv:0.04540)0.760:0.01101)0.752:0.01067)0.849:0.02887,(V140RF-AQIB01156901.1-igkv:0.01107,V227RF-AQIA01017135.1-igkv:0.01088)0.884:0.02831)0.812:0.01822,((V152RF-ABGA01180641.1-igkv:0.01072,V154RF-ABGA01180644.1-igkv:0.01103)0.935:0.03300,(V104RF-ABGA01321409.1-igkv:0.01091,V190RF-ABGA01276916.1-igkv:0.01108)0.924:0.03369)0.762:0.01087)0.775:0.01102)0.902:0.03243)0.665:0.00055)0.541:0.00054)0.838:0.00054)1.000:0.00055)0.904:0.01051)0.000:0.00055)0.825:0.01084,((((V110RF-ABGA01356724.1-igkv:0.01287,(V42RF-CABD02196586.1-igkv:0.01509,(V148RF-AACZ03151857.1-igkv:0.0,V22RF-AJFE01012245.1-igkv:0.0):0.04106)0.782:0.03228)0.825:0.02020,(V36RF-AQIB01144265.1-igkv:0.03297,V211RF-AQIA01017120.1-igkv:0.01100)0.915:0.03327)0.056:0.01052,V36RF-ADFV01106193.1-igkv:0.04450)0.455:0.00055,((((V209RF-JYKQ01076937.1-igkv:0.01728,(V258RF-AHZZ01189923.1-igkv:0.04462,V218RF-AQIA01017126.1-igkv:0.05810)0.754:0.01115)0.000:0.01038,(V34RF-JABR01076263.1-igkv:0.05312,V44RF-AQIB01144274.1-igkv:0.06249)0.609:0.02511)0.691:0.02660,(V30RF-JABR01076261.1-igkv:0.00055,V33RF-JABR01076263.1-igkv:0.05626)0.797:0.03304)0.746:0.01050,((V220RF-AQIA01017128.1-igkv:0.03105,(((V150RF-JYKQ01005022.1-igkv:0.01115,V234RF-AHZZ01106331.1-igkv:0.03380)0.713:0.01096,(V143RF-JYKQ01005012.1-igkv:0.02266,V209RF-AQIA01017120.1-igkv:0.00157)0.870:0.00984)0.456:0.01080,(V69RF-AHZZ01117753.1-igkv:0.03218,V148RF-JYKQ01005018.1-igkv:0.01223)0.870:0.02189)0.752:0.00681)0.370:0.00629,((V154RF-CABD02196521.1-igkv:0.02252,(V145RF-AACZ03151855.1-igkv:0.00055,V20RF-AJFE01012238.1-igkv:0.01082)0.919:0.03310)0.871:0.02187,(V34RF-AQIB01144265.1-igkv:0.03542,V39RF-AQIB01144273.1-igkv:0.08104)0.000:0.00055)0.817:0.01102)0.593:0.01678)0.643:0.00631)0.693:0.01139)0.000:0.00054)0.855:0.01080)0.000:0.00055)0.758:0.01400,((((V30RF-ABDC01351837.1-igkv:0.04292,(V27RF-ABDC01351831.1-igkv:0.01077,V136RF-ABDC01537099.1-igkv:0.00055)0.906:0.00051)0.994:0.15516,(V108RF-ABDC01599688.1-igkv:0.02969,(V59RF-ABDC01394567.1-igkv:0.08590,V36RF-ABDC01360510.1-igkv:0.11787)0.754:0.04349)0.706:0.01178)0.997:0.14884,(V3RF-ABDC01165520.1-igkv:0.0,V96RF-ABDC01522041.1-igkv:0.0):0.09440)0.892:0.05145,V4RF-JZKE01218258.1-igkv:0.11466)0.898:0.06415)0.911:0.06741)0.930:0.11433)0.851:0.07302,((V108RF-AGCE01134619.1-igkv:0.04391,((V36RF-CABD02196508.1-igkv:0.0,V1RF-AACZ03015560.1-igkv:0.0):0.00055,V65RF-ABGA01154383.1-igkv:0.02284)0.879:0.06567)1.000:0.49816,(((V25RF-JABR01076260.1-igkv:0.00054,(V203RF-AQIA01017118.1-igkv:0.01016,(V27RF-AQIB01144264.1-igkv:0.00055,(V44RF-AHZZ01104241.1-igkv:0.02047,V155RF-JYKQ01005033.1-igkv:0.01028)0.000:0.00055)0.000:0.00055)0.890:0.02051)0.859:0.02119,((V155RF-CABD02196542.1-igkv:0.00054,(V143RF-AACZ03151853.1-igkv:0.0,V16RF-AJFE01012235.1-igkv:0.0):0.02072)0.854:0.02004,V32RF-ADFV01106193.1-igkv:0.03248)0.259:0.00931)0.975:0.10150,(V128RF-ABGA01394066.1-igkv:0.02427,((V48RF-AHZZ01104243.1-igkv:0.0,V206RF-AQIA01017120.1-igkv:0.0):0.01120,V31RF-AQIB01144265.1-igkv:0.00055)0.928:0.04463)0.940:0.06355)0.231:0.05002)0.810:0.05856)0.835:0.05969)0.695:0.05060)0.978:0.28724,(((((V101RF-AGCE01112648.1-iglv:0.12520,((V263RF-AHZZ01198553.1-iglv:0.02921,V113RF-JABR01071856.1-iglv:0.05684)0.712:0.00867,((V76RF-AQIB01146137.1-iglv:0.01012,V11RF-AQIA01007576.1-iglv:0.02043)0.791:0.01199,(V58RF-CABD02231416.1-iglv:0.04071,((V123RF-AACZ03127131.1-iglv:0.0,V88RF-AJFE01010827.1-iglv:0.0):0.03210,V169RF-ABGA01252219.1-iglv:0.04118)0.925:0.00053)0.884:0.01794)0.800:0.01848)0.399:0.02485)0.905:0.06391,((V23RF-ABDC01347843.1-iglv:0.12761,(V25RF-JZKE01249957.1-iglv:0.07966,(V24RF-ABDC01347844.1-iglv:0.05730,V25RF-ABDC01349227.1-iglv:0.05741)0.735:0.01251)0.935:0.05068)0.731:0.00820,((V84RF-ABDC01449636.1-iglv:0.00054,(V125RF-ABDC01418360.1-iglv:0.11713,(V26RF-ABDC01349230.1-iglv:0.01008,V53RF-ABDC01384523.1-iglv:0.00054)0.742:0.01086)0.890:0.03025)0.948:0.10295,V28RF-JZKE01249958.1-iglv:0.20794)0.834:0.03050)0.938:0.06857)0.947:0.11244,(((V64RF-CABD02231431.1-iglv:0.01053,(V132RF-AACZ03127143.1-iglv:0.0,V94RF-AJFE01017581.1-iglv:0.0):0.01079)0.918:0.06713,(V29RF-JZKE01249959.1-iglv:0.05715,(((V102RF-AGCE01112652.1-iglv:0.04683,((V51RF-ADFV01126759.1-iglv:0.05292,(((V61RF-CABD02231422.1-iglv:0.00952,V126RF-AACZ03127139.1-iglv:0.02004)0.974:0.04822,(V122RF-AACZ03127131.1-iglv:0.01482,(V87RF-AJFE01010827.1-iglv:0.01145,V90RF-AJFE01010828.1-iglv:0.03009)0.787:0.03256)0.897:0.03682)0.176:0.00055,(V167RF-ABGA01252219.1-iglv:0.00053,V168RF-ABGA01252219.1-iglv:0.00997)0.991:0.05505)0.856:0.01815)0.800:0.00053,(((V227RF-AHZZ01105200.1-iglv:0.07454,(((V70RF-AQIB01146133.1-iglv:0.06037,(((V227RF-JYKQ01126546.1-iglv:0.05055,V10RF-AQIA01007576.1-iglv:0.00709)0.756:0.01107,((V75RF-AQIB01146137.1-iglv:0.0,V78RF-AQIB01146138.1-iglv:0.0):0.06614,V224RF-JYKQ01126546.1-iglv:0.01827)0.838:0.02083)0.923:0.02846,V118RF-JABR01071856.1-iglv:0.00055)0.775:0.01356)0.065:0.01955,(V222RF-JYKQ01126546.1-iglv:0.04315,(V231RF-AHZZ01105201.1-iglv:0.02014,V34RF-AQIA01009600.1-iglv:0.02042)0.753:0.01063)0.848:0.02130)0.795:0.01315,(V226RF-AHZZ01105199.1-iglv:0.02283,V7RF-AQIA01007576.1-iglv:0.04251)0.864:0.02204)0.682:0.00404)0.772:0.01256,V114RF-JABR01071856.1-iglv:0.02316)0.851:0.03050,(V266RF-AHZZ01198553.1-iglv:0.03126,V13RF-AQIA01007576.1-iglv:0.00158)0.937:0.04907)0.872:0.02194)0.874:0.02632)0.783:0.02039,(V163RF-ABGA01252210.1-iglv:0.08059,V166RF-ABGA01252218.1-iglv:0.06149)0.793:0.02291)0.819:0.03244,V100RF-AGCE01112648.1-iglv:0.07789)0.934:0.05710)0.946:0.07674)0.884:0.06000,(((((V55RF-CABD02231410.1-iglv:0.02066,(V120RF-AACZ03127129.1-iglv:0.0,V91RF-AJFE01010829.1-iglv:0.0):0.00054)0.922:0.04164,(V220RF-JYKQ01126546.1-iglv:0.03388,((V117RF-JABR01071856.1-iglv:0.05031,V74RF-AQIB01146137.1-iglv:0.02415)0.870:0.05153,(V50RF-ADFV01126759.1-iglv:0.05557,V173RF-ABGA01252220.1-iglv:0.02199)0.901:0.05682)0.995:0.14220)0.730:0.01080)0.924:0.05803,V48RF-ADFV01126755.1-iglv:0.06051)0.915:0.04185,(V265RF-AHZZ01198553.1-iglv:0.05647,(V121RF-AACZ03127129.1-iglv:0.00982,(V124RF-AACZ03127135.1-iglv:0.01460,(V56RF-CABD02231415.1-iglv:0.02523,V175RF-ABGA01252221.1-iglv:0.05943)0.369:0.02060)0.781:0.01708)0.868:0.02090)0.857:0.02152)0.844:0.02400,((V62RF-CABD02231427.1-iglv:0.02089,((V128RF-AACZ03127139.1-iglv:0.0,V96RF-AJFE01017584.1-iglv:0.0):0.02017,V164RF-ABGA01252215.1-iglv:0.02087)0.778:0.01030)0.855:0.02081,(((V2RF-AQIA01007574.1-iglv:0.02030,V262RF-AHZZ01198551.1-iglv:0.03236)0.461:0.02042,(V216RF-JYKQ01126545.1-iglv:0.00054,(V106RF-JABR01071855.1-iglv:0.03064,V81RF-AQIB01146141.1-iglv:0.00055)0.963:0.03100)0.000:0.00055)0.817:0.02653,V53RF-ADFV01126760.1-iglv:0.03960)0.779:0.01688)0.920:0.04192)0.915:0.06647)0.821:0.05723)0.992:0.23764,(((((((V62RF-ABDC01398089.1-iglv:0.02445,V81RF-ABDC01442374.1-iglv:0.08339)0.256:0.01175,V71RF-ABDC01417539.1-iglv:0.05514)0.856:0.03333,(V22RF-ABDC01342328.1-iglv:0.04152,V127RF-ABDC01425625.1-iglv:0.02155)0.874:0.03744)0.872:0.03107,V78RF-JZKE01238799.1-iglv:0.00053)0.757:0.01108,((V77RF-JZKE01238797.1-iglv:0.01109,((V73RF-ABDC01418168.1-iglv:0.01898,V105RF-ABDC01570800.1-iglv:0.02208)0.993:0.10066,V20RF-JZKE01249944.1-iglv:0.01979)0.861:0.03612)0.792:0.01109,((V137RF-ABDC01540867.1-iglv:0.0,V141RF-ABDC01624510.1-iglv:0.0):0.03300,(V14RF-ABDC01296165.1-iglv:0.02102,(V34RF-ABDC01359388.1-iglv:0.0,V130RF-ABDC01465190.1-iglv:0.0):0.03043)0.885:0.02149)0.231:0.00920)0.727:0.00627)0.806:0.02509,((((V130RF-ADFV01132915.1-iglv:0.05050,V74RF-JYKQ01062966.1-iglv:0.00054)0.424:0.01945,(V55RF-AQIB01146122.1-iglv:0.03066,V27RF-AQIA01007590.1-iglv:0.02037)0.752:0.01003)0.779:0.01640,(((V182RF-ABGA01252248.1-iglv:0.05665,V135RF-JABR01077601.1-iglv:0.05116)0.189:0.01114,(V30RF-AQIA01007600.1-iglv:0.01333,(V30RF-AHZZ01097949.1-iglv:0.00957,V211RF-JYKQ01080923.1-iglv:0.00974)0.835:0.01793)0.792:0.01458)0.786:0.01708,V40RF-AHZZ01099970.1-iglv:0.00939)0.798:0.01860)0.948:0.05125,((V133RF-JABR01077601.1-iglv:0.02899,V183RF-ABGA01252249.1-iglv:0.04801)0.918:0.04105,(V49RF-CABD02231318.1-iglv:0.00054,(V192RF-AACZ03127313.1-iglv:0.00055,(V173RF-AACZ03176987.1-iglv:0.00990,V109RF-AJFE01022796.1-iglv:0.04027)0.126:0.00954)0.898:0.01921)0.852:0.02735)0.784:0.02649)0.886:0.04659)0.983:0.15315,((((V19RF-ABDC01318812.1-iglv:0.07425,V76RF-JZKE01238797.1-iglv:0.11274)0.726:0.01073,((V18RF-ABDC01318810.1-iglv:0.05000,(V76RF-ABDC01422153.1-iglv:0.0,V86RF-ABDC01466438.1-iglv:0.0):0.02476)0.849:0.02084,(V65RF-ABDC01399713.1-iglv:0.0,V94RF-ABDC01498106.1-iglv:0.0):0.09923)0.772:0.01657)0.949:0.07192,(((((((V225RF-AHZZ01105199.1-iglv:0.02618,(V77RF-AQIB01146138.1-iglv:0.01291,(V264RF-AHZZ01198553.1-igkv:0.00054,V12RF-AQIA01007576.1-igkv:0.00980)0.994:0.07232)0.912:0.03837)0.740:0.01778,V35RF-AQIA01009608.1-iglv:0.02438)0.991:0.08435,(((((V69RF-AQIB01146133.1-iglv:0.01074,(V230RF-AHZZ01105201.1-iglv:0.01411,(V221RF-JYKQ01126546.1-iglv:0.01065,(V73RF-AQIB01146136.1-iglv:0.03204,V33RF-AQIA01009600.1-iglv:0.01057)0.786:0.01075)0.761:0.00977)0.797:0.01654)0.640:0.01998,V60RF-CABD02231421.1-iglv:0.05350)0.294:0.00054,(V59RF-CABD02231419.1-iglv:0.03096,((V105RF-JABR01071855.1-iglv:0.02187,V111RF-JABR01071856.1-iglv:0.01679)0.957:0.05180,V89RF-AJFE01010827.1-iglv:0.02964)0.758:0.00946)0.757:0.01008)0.781:0.01071,(V171RF-ABGA01252219.1-iglv:0.01078,((V206RF-AACZ03177116.1-iglv:0.04208,V172RF-ABGA01252219.1-iglv:0.01986)0.843:0.02187,V170RF-ABGA01252219.1-iglv:0.03139)0.000:0.00054)0.960:0.04114)0.746:0.00889,(V228RF-JYKQ01126546.1-iglv:0.00055,((V80RF-AQIB01146140.1-iglv:0.01001,(V225RF-JYKQ01126546.1-iglv:0.05406,(V5RF-AQIA01007575.1-iglv:0.00054,((((V130RF-AACZ03127139.1-iglv:0.00989,V97RF-AJFE01017584.1-iglv:0.00999)0.760:0.01047,(V63RF-CABD02231427.1-iglv:0.02038,V161RF-ABGA01252206.1-iglv:0.06144)0.895:0.03020)0.887:0.03293,(V127RF-AACZ03127139.1-iglv:0.01034,(V104RF-JABR01071855.1-iglv:0.02158,(V215RF-AACZ03191230.1-iglv:0.0,V98RF-AJFE01017586.1-iglv:0.0):0.00054)0.793:0.01033)0.868:0.03246)0.508:0.01609,(((V261RF-AHZZ01198551.1-iglv:0.06950,(V49RF-ADFV01126756.1-iglv:0.03197,(V8RF-AQIA01007576.1-iglv:0.02125,V116RF-JABR01071856.1-iglv:0.02230)0.000:0.00054)0.762:0.01021)0.814:0.01710,V223RF-AHZZ01105198.1-iglv:0.00055)0.909:0.00054,V165RF-ABGA01252216.1-iglv:0.07439)0.365:0.01704)0.782:0.01587)0.878:0.01010)0.000:0.00055)0.765:0.01011,((V4RF-AQIA01007574.1-iglv:0.00054,((V83RF-AQIB01146141.1-iglv:0.02089,V1RF-AQIA01007574.1-iglv:0.00055)0.896:0.02072,((V259RF-AHZZ01198550.1-iglv:0.0,V218RF-JYKQ01126545.1-iglv:0.0):0.02072,V79RF-AQIB01146140.1-iglv:0.01304)0.489:0.01313)0.717:0.00055)0.845:0.01348,(V267RF-AHZZ01198553.1-iglv:0.00987,V215RF-JYKQ01126545.1-iglv:0.00983)0.000:0.00055)0.875:0.01966)0.837:0.02025)0.690:0.00055)0.776:0.02624)0.664:0.00482,V107RF-JABR01071855.1-iglv:0.05445)0.820:0.03032,(V219RF-JYKQ01126545.1-iglv:0.00055,(V260RF-AHZZ01198550.1-iglv:0.00055,(V84RF-AQIB01146141.1-iglv:0.01952,V0RF-AQIA01007569.1-iglv:0.01955)0.786:0.00973)0.911:0.01045)0.999:0.11765)0.307:0.01484,(V172RF-AACZ03176965.1-iglv:0.26590,(V24RF-JZKE01249956.1-iglv:0.01964,V26RF-JZKE01249957.1-iglv:0.00054)0.975:0.10387)0.799:0.02507)0.955:0.12877,V181RF-ABGA01252248.1-iglv:0.42298)0.777:0.04454)0.742:0.04508,(((V103RF-AGCE01112674.1-iglv:0.13682,(((V119RF-JABR01071859.1-iglv:0.01312,((V192RF-AHZZ01089506.1-iglv:0.00963,(V67RF-AQIB01146123.1-iglv:0.02916,V230RF-JYKQ01126579.1-iglv:0.02430)0.795:0.01747)0.771:0.00970,V14RF-AQIA01007584.1-iglv:0.00054)0.948:0.04764)0.992:0.08323,(((V171RF-AACZ03176953.1-iglv:0.01026,((V53RF-CABD02231362.1-iglv:0.00054,V54RF-CABD02231364.1-iglv:0.01986)0.892:0.02012,V102RF-AJFE01020631.1-iglv:0.02015)0.755:0.00971)0.871:0.02034,((((V198RF-AHZZ01089508.1-iglv:0.00055,V23RF-AQIA01007588.1-iglv:0.02004)0.846:0.02136,(V59RF-AQIB01146122.1-iglv:0.05234,V243RF-JYKQ01126589.1-iglv:0.01105)0.320:0.01076)0.941:0.04105,(V177RF-ABGA01252241.1-iglv:0.03085,V180RF-ABGA01252243.1-iglv:0.01023)0.896:0.02955)0.765:0.01183,((V43RF-ADFV01126738.1-iglv:0.03938,(V47RF-ADFV01126742.1-iglv:0.01020,V131RF-ADFV01132918.1-iglv:0.03039)0.852:0.01968)0.770:0.01101,(V125RF-JABR01071861.1-iglv:0.02943,((V240RF-JYKQ01126586.1-iglv:0.02034,V24RF-AQIA01007588.1-iglv:0.01003)0.794:0.00989,((V77RF-JABR01189674.1-iglv:0.0,V128RF-JABR01071862.1-iglv:0.0):0.02002,V195RF-AHZZ01089507.1-iglv:0.01007)0.000:0.00054)0.987:0.07368)0.773:0.01087)0.843:0.02007)0.756:0.01046)0.768:0.01052,V131RF-JABR01071862.1-iglv:0.14118)0.766:0.01003)0.391:0.00054,(V186RF-AHZZ01089506.1-iglv:0.05053,(V238RF-JYKQ01126585.1-iglv:0.03002,((V4RF-JABR01016432.1-iglv:0.05142,V62RF-AQIB01146122.1-iglv:0.06088)0.913:0.00055,V22RF-AQIA01007587.1-iglv:0.00993)0.719:0.00986)0.903:0.00053)0.856:0.01955)0.709:0.05035)0.799:0.02831,((V46RF-ADFV01126741.1-iglv:0.05868,((((V241RF-JYKQ01126589.1-iglv:0.00994,V25RF-AQIA01007589.1-iglv:0.01015)0.777:0.01013,(V122RF-JABR01071860.1-iglv:0.05340,(V18RF-AQIA01007586.1-iglv:0.04520,(V64RF-AQIB01146122.1-iglv:0.03138,V236RF-JYKQ01126581.1-iglv:0.03158)0.752:0.01058)0.744:0.01074)0.927:0.04121)0.762:0.01874,(V41RF-AHZZ01099973.1-iglv:0.00980,(V20RF-AQIA01007586.1-iglv:0.03191,(V123RF-JABR01071860.1-iglv:0.01030,V129RF-JABR01071862.1-iglv:0.03525)0.762:0.01153)0.886:0.02427)0.771:0.01038)0.859:0.00052,(V100RF-AJFE01020628.1-iglv:0.02064,((V232RF-JYKQ01126580.1-iglv:0.03184,(V56RF-AQIB01146122.1-iglv:0.04083,V65RF-AQIB01146122.1-iglv:0.02194)0.714:0.01086)0.413:0.01124,(V190RF-AHZZ01089506.1-iglv:0.03029,V233RF-JYKQ01126580.1-iglv:0.01178)0.955:0.04902)0.759:0.01048)0.718:0.01054)0.746:0.01510)0.108:0.03691,(((V188RF-AHZZ01089506.1-iglv:0.04409,(((V17RF-AQIA01007586.1-iglv:0.09892,V45RF-ADFV01126741.1-iglv:0.06335)0.748:0.00844,V179RF-ABGA01252243.1-iglv:0.02018)0.920:0.03060,((V50RF-CABD02231359.1-iglv:0.0,V106RF-AJFE01020634.1-iglv:0.0):0.00055,V169RF-AACZ03176953.1-iglv:0.00999)0.869:0.02050)0.744:0.01245)0.920:0.04504,V235RF-JYKQ01126581.1-iglv:0.01613)0.867:0.04257,(V189RF-AHZZ01089506.1-iglv:0.00055,V19RF-AQIA01007586.1-iglv:0.01077)0.876:0.02988)0.797:0.04308)0.906:0.07521)0.154:0.01895,V109RF-AGCE01135277.1-iglv:0.13085)0.719:0.01256)0.532:0.07716)0.824:0.08909)0.595:0.06202,(((V136RF-JABR01077603.1-iglv:0.04055,(V114RF-AGCE01147939.1-iglv:0.06834,(V106RF-ABGA01335280.1-iglv:0.02792,(V48RF-CABD02231299.1-iglv:0.00054,(V195RF-AACZ03127321.1-iglv:0.0,V111RF-AJFE01022798.1-iglv:0.0):0.04113)0.903:0.02381)0.876:0.02899)0.776:0.01486)0.462:0.00233,(V31RF-AQIA01007605.1-iglv:0.00055,((V29RF-AHZZ01097944.1-iglv:0.0,V80RF-JYKQ01114545.1-iglv:0.0):0.02026,(V225RF-AQIB01146043.1-iglv:0.02012,V6RF-JABR01043229.1-iglv:0.05363)0.726:0.00980)0.694:0.00996)0.782:0.01768)0.998:0.45961,(((V63RF-ABDC01398089.1-iglv:0.09845,V15RF-JZKE01249931.1-iglv:0.05739)0.759:0.03137,((V13RF-ABDC01296165.1-iglv:0.01037,V15RF-ABDC01296166.1-iglv:0.00054)0.964:0.06277,((V18RF-JZKE01249933.1-iglv:0.02127,(V140RF-ABDC01582683.1-iglv:0.09463,V79RF-JZKE01238800.1-iglv:0.01879)0.637:0.00263)0.862:0.00053,((((V130RF-JABR01071862.1-iglv:0.02112,(V58RF-AQIB01146122.1-iglv:0.06470,V26RF-AQIA01007589.1-iglv:0.00054)0.870:0.02120)0.468:0.01027,(V197RF-AHZZ01089508.1-iglv:0.03215,V3RF-JABR01016432.1-iglv:0.02139)0.939:0.03658)0.766:0.01082,((V242RF-JYKQ01126589.1-iglv:0.03148,((V237RF-JYKQ01126585.1-iglv:0.01050,(V61RF-AQIB01146122.1-iglv:0.01046,V21RF-AQIA01007587.1-iglv:0.00055)0.295:0.00054)0.987:0.08882,V101RF-AJFE01020628.1-iglv:0.09032)0.857:0.03438)0.290:0.00055,((V42RF-ADFV01126738.1-iglv:0.05243,V104RF-AJFE01020631.1-iglv:0.03227)0.871:0.02131,(((V105RF-AJFE01020632.1-iglv:0.02087,V176RF-ABGA01252241.1-iglv:0.06446)0.956:0.06438,V170RF-AACZ03176953.1-iglv:0.00055)0.897:0.03462,V52RF-CABD02231360.1-iglv:0.01007)0.890:0.02155)0.759:0.01038)0.876:0.01040)0.778:0.00054,((((V239RF-JYKQ01126586.1-iglv:0.01045,V229RF-JYKQ01126579.1-iglv:0.00055)0.000:0.00055,(V60RF-AQIB01146122.1-iglv:0.01049,((V124RF-JABR01071861.1-iglv:0.03203,V66RF-AQIB01146122.1-iglv:0.00055)0.820:0.01057,(V194RF-AHZZ01089507.1-iglv:0.02152,(V191RF-AHZZ01089506.1-iglv:0.00055,V15RF-AQIA01007585.1-iglv:0.02122)0.439:0.00055)0.123:0.01082)0.392:0.00054)0.860:0.01050)0.455:0.02140,V127RF-JABR01071862.1-iglv:0.00055)1.000:0.12127,(V187RF-AHZZ01089506.1-iglv:0.01079,(V234RF-JYKQ01126581.1-iglv:0.00054,(V63RF-AQIB01146122.1-iglv:0.01060,V16RF-AQIA01007586.1-iglv:0.01037)0.894:0.02122)0.886:0.02143)0.619:0.01031)0.782:0.02094)0.996:0.08958)0.627:0.02455)0.858:0.04776)0.918:0.18596,((V16RF-JZKE01249932.1-iglv:0.0,V17RF-JZKE01249932.1-iglv:0.0):0.17853,(V194RF-AACZ03127321.1-iglv:0.0,V110RF-AJFE01022798.1-iglv:0.0):0.12079)0.987:0.33033)0.981:0.33540)0.818:0.09616)0.926:0.16554)0.449:0.15116)0.718:0.15853)0.999:0.99775,(((((V101RF-AACZ03097906.1-ighv:0.0,V46RF-AJFE01045051.1-ighv:0.0):0.01183,(V136RF-CABD02117475.1-ighv:0.02444,((V59RF-ABGA01099955.1-ighv:0.00517,V113RF-ABGA01362157.1-ighv:0.01674)0.925:0.04430,(V178RF-AHZZ01084887.1-ighv:0.00054,(((V138RF-AQIB01153565.1-ighv:0.02166,V137RF-AQIB01153564.1-ighv:0.03336)0.870:0.02198,V238RF-AQIA01066369.1-ighv:0.01078)0.904:0.02192,(((V91RF-JABR01035060.1-ighv:0.00055,V208RF-JABR01190886.1-ighv:0.01109)0.779:0.01098,(V129RF-AQIB01153555.1-ighv:0.01743,(V185RF-AHZZ01084896.1-ighv:0.02194,(V23RF-ABGA01044310.1-ighv:0.04417,V187RF-AQIA01075862.1-ighv:0.00055)0.280:0.01078)0.804:0.01833)0.819:0.02083)0.862:0.02235,(V11RF-JYKQ01005773.1-ighv:0.0,V12RF-JYKQ01005774.1-ighv:0.0):0.02159)0.776:0.01080)0.796:0.01063)0.891:0.02719)0.884:0.03969)0.323:0.01187)0.752:0.04583,V58RF-AGCE01147864.1-ighv:0.03499)0.999:0.29070,((((V104RF-ADFV01131938.1-ighv:0.0,V105RF-ADFV01131939.1-ighv:0.0):0.02338,(V167RF-AQIA01075830.1-ighv:0.02358,(V13RF-JABR01059012.1-ighv:0.02925,((V73RF-AHZZ01124687.1-ighv:0.0,V253RF-AHZZ01125719.1-ighv:0.0,V254RF-AHZZ01181503.1-ighv:0.0):0.03281,V132RF-JYKQ01245882.1-ighv:0.00055)0.786:0.01223)0.499:0.01046)0.920:0.03756)0.447:0.02372,((V122RF-CABD02117431.1-ighv:0.00054,((V38RF-JYKQ01041707.1-ighv:0.00055,V252RF-AQIA01066397.1-ighv:0.02218)0.906:0.04781,(V144RF-CABD02117506.1-ighv:0.00055,(V0RF-ABGA01025787.1-ighv:0.04594,(V89RF-AACZ03097899.1-ighv:0.00055,V2RF-AJFE01011107.1-ighv:0.01124)0.082:0.00055)0.920:0.01068)0.782:0.04242)0.886:0.03435)0.908:0.03201,V164RF-AACZ03171037.1-ighv:0.01192)0.810:0.02046)0.989:0.15875,(((((V99RF-AQIB01153498.1-ighv:0.02281,(V200RF-AHZZ01090492.1-ighv:0.01088,V156RF-AQIA01075814.1-ighv:0.00055)0.788:0.01115)0.884:0.03571,((V146RF-CABD02117766.1-ighv:0.01310,(V187RF-AACZ03098097.1-ighv:0.09075,V147RF-CABD02117767.1-ighv:0.02224)0.785:0.00876)0.390:0.01244,V227RF-ABGA01360476.1-ighv:0.10392)0.672:0.02298)0.800:0.01873,((((V90RF-AQIB01153484.1-ighv:0.09906,V48RF-ABGA01099934.1-ighv:0.07728)0.979:0.09381,V57RF-ABDC01391612.1-ighv:0.05501)0.721:0.00054,V112RF-AGCE01147919.1-ighv:0.06486)0.791:0.03019,(V103RF-ADFV01131933.1-ighv:0.04582,(((V33RF-CABD02136332.1-ighv:0.0,V132RF-CABD02117467.1-ighv:0.0):0.01759,(V104RF-AACZ03097906.1-ighv:0.0,V49RF-AJFE01045051.1-ighv:0.0):0.06368)0.582:0.01178,(V115RF-AACZ03102011.1-ighv:0.01439,V163RF-AJFE01119867.1-ighv:0.03038)1.000:0.15849)0.843:0.02274)0.862:0.02555)0.702:0.00904)0.776:0.01139,(((((V69RF-ABGA01174994.1-ighv:0.12971,(V97RF-AQIB01153491.1-ighv:0.07013,(V102RF-AQIB01153504.1-ighv:0.0,V103RF-AQIB01153506.1-ighv:0.0):0.08412)0.969:0.08277)0.702:0.01498,((V190RF-AACZ03098100.1-ighv:0.00054,(V112RF-CABD02117385.1-ighv:0.01027,V228RF-ABGA01360478.1-ighv:0.09460)0.973:0.00053)0.950:0.04869,((V139RF-CABD02117482.1-ighv:0.01638,((V15RF-ABGA01044302.1-ighv:0.0,V101RF-ABGA01313763.1-ighv:0.0):0.03708,(V67RF-AHZZ01111405.1-ighv:0.02558,V121RF-AQIB01153538.1-ighv:0.13631)0.909:0.04519)0.278:0.01029)0.852:0.02667,V120RF-ADFV01131958.1-ighv:0.00053)0.965:0.06281)0.291:0.01116)0.856:0.02730,(V111RF-AGCE01147916.1-ighv:0.06454,((V123RF-AQIB01153541.1-ighv:0.03320,V161RF-JYKQ01015026.1-ighv:0.00054)0.464:0.02574,(V133RF-CABD02117467.1-ighv:0.02212,(V105RF-AACZ03097906.1-ighv:0.0,V50RF-AJFE01045051.1-ighv:0.0):0.03292)0.930:0.04096)0.758:0.03394)0.941:0.06272)0.718:0.01068,(((V81RF-JABR01004697.1-ighv:0.01072,(V44RF-JYKQ01041718.1-ighv:0.01107,((V91RF-AQIB01153484.1-ighv:0.0,V245RF-AQIA01066387.1-ighv:0.0):0.00055,V24RF-AHZZ01091598.1-ighv:0.02212)0.000:0.00054)0.901:0.03400)0.996:0.10278,(V71RF-AGCE01148067.1-ighv:0.02627,V116RF-AGCE01148081.1-ighv:0.10247)0.877:0.04518)0.483:0.01684,(V125RF-JYKQ01245859.1-ighv:0.01111,V199RF-JYKQ01062881.1-ighv:0.04491)0.865:0.02199)0.918:0.00053)0.856:0.00054,((V93RF-AJFE01010857.1-ighv:0.17259,((V62RF-AGCE01147866.1-ighv:0.14482,(V12RF-AHZZ01064617.1-ighv:0.04580,(V122RF-AQIB01153541.1-ighv:0.01823,V160RF-JYKQ01015024.1-ighv:0.05324)0.922:0.05017)0.948:0.06489)0.707:0.01371,(V142RF-JABR01086102.1-ighv:0.00054,((V16RF-JABR01066987.1-ighv:0.07477,(((V203RF-AHZZ01090495.1-ighv:0.02214,V169RF-JYKQ01042857.1-ighv:0.01044)0.981:0.06904,(V176RF-AQIA01075848.1-ighv:0.01148,(V96RF-AQIB01153491.1-ighv:0.04464,V120RF-AQIB01153538.1-ighv:0.05489)0.404:0.01065)0.803:0.00089)0.880:0.03229,((V14RF-JABR01062345.1-ighv:0.03288,(V52RF-JABR01089346.1-ighv:0.03165,V103RF-JABR01068488.1-ighv:0.02064)0.941:0.03141)0.860:0.02246,(V126RF-ADFV01131961.1-ighv:0.05600,(V115RF-CABD02117395.1-ighv:0.05592,((V95RF-AACZ03097900.1-ighv:0.0,V5RF-AJFE01011111.1-ighv:0.0):0.00054,V11RF-ABGA01025808.1-ighv:0.08990)0.283:0.01171)0.908:0.04314)0.889:0.03512)0.752:0.01182)0.733:0.01127)0.000:0.00054,V141RF-JABR01078980.1-ighv:0.07082)0.305:0.02217)0.993:0.08932)0.732:0.03220)0.334:0.03075,(V56RF-AGCE01147749.1-ighv:0.06659,(((V61RF-AHZZ01108247.1-ighv:0.03592,((V112RF-AQIB01153509.1-ighv:0.07817,V254RF-AQIA01073275.1-ighv:0.02590)0.452:0.02249,V133RF-JYKQ01245882.1-ighv:0.01944)0.854:0.02541)0.726:0.01052,(V215RF-AHZZ01096575.1-ighv:0.04115,V171RF-JABR01092598.1-ighv:0.02108)0.813:0.02071)0.890:0.02436,((V110RF-ADFV01131946.1-ighv:0.02578,V121RF-ADFV01131959.1-ighv:0.04484)0.855:0.04640,((V51RF-ABGA01099940.1-ighv:0.03983,((V94RF-AQIB01153489.1-ighv:0.01117,V241RF-AQIA01066385.1-ighv:0.04446)0.974:0.06921,(V70RF-ABGA01174995.1-ighv:0.04967,V56RF-ADFV01136793.1-ighv:0.15332)0.225:0.01148)0.759:0.02061)0.761:0.02980,(V155RF-AACZ03171037.1-ighv:0.01092,V39RF-AJFE01045037.1-ighv:0.00055)0.857:0.02614)0.976:0.09612)0.715:0.01075)0.956:0.07303)0.949:0.07107)0.719:0.01200)0.778:0.02105)0.734:0.00078,((V96RF-JABR01055994.1-ighv:0.02210,(V76RF-JYKQ01067101.1-ighv:0.04260,(V119RF-AQIB01153538.1-ighv:0.01166,V175RF-AQIA01075848.1-ighv:0.04202)0.457:0.01063)0.761:0.01057)0.897:0.03548,(V160RF-AACZ03171037.1-ighv:0.0,V118RF-AJFE01045444.1-ighv:0.0):0.04201)0.915:0.04365)0.910:0.07137)0.934:0.14326)0.984:0.23519,((((V19RF-JYKQ01005787.1-ighv:0.06019,(((V111RF-ADFV01131948.1-ighv:0.01281,(V117RF-AACZ03107095.1-ighv:0.00055,(V31RF-CABD02136297.1-ighv:0.01917,V205RF-AACZ03173117.1-ighv:0.00055)0.845:0.00950)0.969:0.04737)0.792:0.01520,(V50RF-ABGA01099938.1-ighv:0.01089,(V121RF-CABD02117430.1-ighv:0.03973,(V154RF-AACZ03171037.1-ighv:0.0,V38RF-AJFE01045035.1-ighv:0.0):0.02143)0.444:0.01883)0.812:0.01953)0.959:0.06007,(((V248RF-AQIA01066387.1-ighv:0.01069,V20RF-JABR01071886.1-ighv:0.10224)0.782:0.01058,(V107RF-ADFV01131940.1-ighv:0.02206,V191RF-AACZ03098103.1-ighv:0.05686)0.856:0.02196)0.752:0.01053,((V18RF-AHZZ01069453.1-ighv:0.00053,V16RF-JYKQ01005777.1-ighv:0.02056)0.785:0.01011,(V21RF-AHZZ01069455.1-ighv:0.02517,V94RF-AACZ03097900.1-ighv:0.02658)0.731:0.01016)0.870:0.02168)0.889:0.03371)0.811:0.03488)1.000:0.49047,V113RF-AGCE01147923.1-ighv:0.06936)0.863:0.05236,((V168RF-AQIA01075832.1-ighv:0.00054,((((((((V159RF-AQIA01075818.1-ighv:0.03301,V172RF-AQIA01075834.1-ighv:0.04341)0.322:0.01051,V38RF-AHZZ01098942.1-ighv:0.05786)0.000:0.00054,(V249RF-AQIA01066387.1-ighv:0.01075,(V184RF-AQIA01075862.1-ighv:0.00054,V181RF-AQIA01075860.1-ighv:0.04407)0.929:0.03167)0.760:0.01045)0.760:0.01026,V28RF-AHZZ01091603.1-ighv:0.05581)0.884:0.02744,((((V250RF-AHZZ01112481.1-ighv:0.04517,V177RF-AQIA01075855.1-ighv:0.01455)0.865:0.02878,(V18RF-ABGA01044306.1-ighv:0.02175,(V177RF-AHZZ01069461.1-ighv:0.05750,(((V62RF-ABGA01104801.1-ighv:0.02158,V100RF-ABGA01313761.1-ighv:0.02215)0.000:0.00054,V14RF-ABGA01044302.1-ighv:0.01080)0.000:0.00055,V17RF-ABGA01044305.1-ighv:0.02215)0.098:0.00055)0.392:0.01384)0.755:0.01356)0.243:0.00054,V98RF-AQIB01153492.1-ighv:0.04371)0.701:0.01140,((V74RF-ABGA01194064.1-ighv:0.0,V229RF-ABGA01360480.1-ighv:0.0):0.01469,(V128RF-CABD02117454.1-ighv:0.02088,(V165RF-AACZ03171037.1-ighv:0.0,V189RF-AACZ03098100.1-ighv:0.0):0.00055)0.780:0.01673)0.988:0.05568)0.524:0.00545)0.821:0.01908,((V85RF-AQIB01153480.1-ighv:0.04488,V168RF-JYKQ01042840.1-ighv:0.06360)0.869:0.02543,((V74RF-AHZZ01129142.1-ighv:0.02232,V180RF-AQIA01075859.1-ighv:0.02121)0.767:0.01013,(V173RF-AQIA01075834.1-ighv:0.01822,(V136RF-JYKQ01245888.1-ighv:0.01819,(V202RF-AHZZ01090494.1-ighv:0.03099,(V211RF-AHZZ01096568.1-ighv:0.00053,V221RF-AHZZ01103258.1-ighv:0.02026)0.865:0.02047)0.931:0.03775)0.806:0.01538)0.760:0.00700)0.683:0.01043)0.873:0.02127)0.767:0.01010,(((V178RF-AQIA01075856.1-ighv:0.02072,((V77RF-JYKQ01067101.1-ighv:0.02019,V179RF-AQIA01075857.1-ighv:0.00062)0.964:0.04113,V21RF-JABR01074704.1-ighv:0.02038)0.678:0.00055)0.847:0.01007,(V226RF-AQIB01153518.1-ighv:0.03150,V174RF-AQIA01075844.1-ighv:0.04325)0.837:0.00055)0.753:0.01161,(V65RF-AHZZ01110760.1-ighv:0.04689,V242RF-AHZZ01108758.1-ighv:0.06864)0.929:0.04747)0.840:0.01976)0.772:0.01053,((V54RF-JABR01091180.1-ighv:0.04478,(V155RF-AQIA01075814.1-ighv:0.02150,(V89RF-JABR01035060.1-ighv:0.02214,(V13RF-AHZZ01064625.1-ighv:0.07547,V216RF-AHZZ01103093.1-ighv:0.04929)0.760:0.01665)0.758:0.01215)0.747:0.00976)0.753:0.01439,(((V102RF-ABGA01313764.1-ighv:0.03279,(V113RF-ADFV01131950.1-ighv:0.00055,V119RF-ADFV01131957.1-ighv:0.05578)0.902:0.02253)0.775:0.01028,((V111RF-AACZ03098146.1-ighv:0.04339,V20RF-ABGA01044307.1-ighv:0.00054)0.796:0.00852,(((V117RF-AQIB01153522.1-ighv:0.06129,V159RF-JYKQ01015003.1-ighv:0.06422)0.879:0.03885,V61RF-ABGA01104800.1-ighv:0.01155)0.622:0.01167,V108RF-ADFV01131940.1-ighv:0.04615)0.762:0.01686)0.797:0.00925)0.917:0.00055,(((V30RF-ABGA01058270.1-ighv:0.09070,((V28RF-ABGA01058270.1-ighv:0.06543,(((V127RF-CABD02117445.1-ighv:0.05073,(V115RF-ADFV01131951.1-ighv:0.07119,V79RF-ABGA01243343.1-ighv:0.05839)0.411:0.02515)0.845:0.02936,((V37RF-AJFE01045032.1-ighv:0.00055,(V199RF-AACZ03171126.1-ighv:0.04384,(V139RF-JABR01077917.1-ighv:0.02437,((V15RF-AHZZ01064636.1-ighv:0.02029,(V197RF-JYKQ01056018.1-ighv:0.02178,V14RF-AHZZ01064628.1-ighv:0.11020)0.443:0.02725)0.872:0.02209,V116RF-AQIB01153517.1-ighv:0.01071)0.932:0.04883)0.927:0.05157)0.776:0.00054)0.917:0.02199,V123RF-CABD02117438.1-ighv:0.04416)0.950:0.00054)0.766:0.01518,V115RF-AGCE01148076.1-ighv:0.21529)0.611:0.00423)0.715:0.01186,V124RF-CABD02117439.1-ighv:0.01913)0.963:0.05641)0.333:0.00053,(V47RF-ABGA01099934.1-ighv:0.04380,((V13RF-ABGA01037228.1-ighv:0.01098,V16RF-ABGA01044304.1-ighv:0.00054)0.000:0.00054,(V108RF-AACZ03097916.1-ighv:0.00053,((V161RF-AQIA01075821.1-ighv:0.00055,(V128RF-JYKQ01245876.1-ighv:0.02272,V20RF-JYKQ01005788.1-ighv:0.01181)0.889:0.02294)0.905:0.02172,(V217RF-AHZZ01103093.1-ighv:0.00054,(V104RF-AQIB01153507.1-ighv:0.03295,V220RF-AHZZ01103097.1-ighv:0.00055)0.718:0.01078)0.735:0.00054)0.889:0.04521)0.882:0.02188)0.745:0.00758)0.878:0.02814)0.679:0.00053,(V138RF-CABD02117482.1-ighv:0.02141,(V98RF-AACZ03097904.1-ighv:0.00054,(V99RF-AACZ03097905.1-ighv:0.03178,V44RF-AJFE01045051.1-ighv:0.00055)0.449:0.01070)0.900:0.02163)0.780:0.01070)0.922:0.01033)0.894:0.01981)0.751:0.00770)0.736:0.00054)0.899:0.01206,(V171RF-AQIA01075832.1-ighv:0.02225,(V39RF-AHZZ01098950.1-ighv:0.00054,V125RF-AQIB01153550.1-ighv:0.05006)0.733:0.02446)0.756:0.01180)0.713:0.00054)0.287:0.01115,V138RF-JABR01077916.1-ighv:0.04294)0.999:0.39113)0.227:0.07732)0.481:0.10844,(((((V57RF-JABR01091180.1-ighv:0.03249,((V145RF-CABD02117545.1-ighv:0.03203,(V114RF-AACZ03102011.1-ighv:0.02110,V164RF-AJFE01119883.1-ighv:0.01033)0.817:0.00055)0.973:0.05515,((V17RF-AHZZ01069451.1-ighv:0.01341,(V15RF-JYKQ01005777.1-ighv:0.02148,V232RF-AQIA01066360.1-ighv:0.00053)0.344:0.01075)0.828:0.04006,(V40RF-JYKQ01041713.1-ighv:0.16839,(V42RF-AHZZ01100290.1-ighv:0.00055,(V223RF-AQIB01145361.1-ighv:0.0,V224RF-AQIB01145362.1-ighv:0.0):0.02148)0.984:0.11092)0.281:0.02529)0.897:0.00055)0.820:0.01083)0.962:0.00055,((V184RF-AHZZ01084893.1-ighv:0.01065,V107RF-AQIB01153507.1-ighv:0.05381)0.819:0.01038,((V5RF-JYKQ01005769.1-ighv:0.04278,V188RF-AQIA01075865.1-ighv:0.02165)0.000:0.01056,(((V130RF-AQIB01153555.1-ighv:0.02043,(V142RF-CABD02117494.1-ighv:0.02059,V92RF-AACZ03097900.1-ighv:0.01148)0.888:0.03205)0.871:0.00055,V157RF-AQIA01075814.1-ighv:0.03551)0.444:0.01068,V7RF-ABGA01025808.1-ighv:0.03144)0.791:0.00053)0.894:0.00053)0.420:0.02189)0.920:0.02141,(V2RF-ABGA01025790.1-ighv:0.07695,(V106RF-AQIB01153507.1-ighv:0.07833,(V86RF-AQIB01153481.1-ighv:0.04186,((((V164RF-AQIA01075825.1-ighv:0.02056,(V56RF-JABR01091180.1-ighv:0.02049,V83RF-JABR01004698.1-ighv:0.01023)1.000:0.00055)0.773:0.00937,(V6RF-ABGA01025808.1-ighv:0.02086,(V91RF-AACZ03097899.1-ighv:0.02099,V4RF-AJFE01011110.1-ighv:0.01034)0.876:0.02084)0.894:0.02041)0.743:0.01093,V250RF-AQIA01066395.1-ighv:0.04083)0.798:0.02125,V39RF-JYKQ01041713.1-ighv:0.02109)0.867:0.02566)0.137:0.00775)0.886:0.03787)0.885:0.05763)0.417:0.00055,V22RF-JABR01074958.1-ighv:0.05587)0.849:0.02165,(((((((V31RF-ABGA01058273.1-ighv:0.01071,V71RF-ABGA01174999.1-ighv:0.00054)0.973:0.03246,(((V116RF-ADFV01131954.1-ighv:0.00962,(V93RF-AQIB01153486.1-ighv:0.03184,V242RF-AQIA01066385.1-ighv:0.01557)0.940:0.04309)0.998:0.00105,((V102RF-AACZ03097906.1-ighv:0.0,V47RF-AJFE01045051.1-ighv:0.0):0.03264,(V24RF-ABGA01044313.1-ighv:0.02162,V135RF-CABD02117473.1-ighv:0.03333)0.910:0.00055)0.927:0.02166)0.789:0.01143,((V58RF-ABGA01099948.1-ighv:0.03404,(V53RF-ABGA01099941.1-ighv:0.02218,(V120RF-CABD02117421.1-ighv:0.02171,V157RF-AACZ03171037.1-ighv:0.02818)0.793:0.01708)0.857:0.02299)0.776:0.01592,((V251RF-AQIA01066395.1-ighv:0.01031,V253RF-AQIA01066397.1-ighv:0.03435)0.732:0.01351,(V171RF-JYKQ01042861.1-ighv:0.03330,(V87RF-AQIB01153482.1-ighv:0.01079,V41RF-JYKQ01041713.1-ighv:0.02165)0.757:0.01271)0.344:0.01125)0.873:0.02819)0.738:0.00934)0.887:0.02188)0.000:0.00054,(V9RF-ABGA01025808.1-ighv:0.05294,(V141RF-CABD02117492.1-ighv:0.04152,V93RF-AACZ03097900.1-ighv:0.02313)0.895:0.03244)0.770:0.01232)0.776:0.01075,V109RF-ADFV01131944.1-ighv:0.04506)0.774:0.01072,((V165RF-AQIA01075826.1-ighv:0.01071,(((V99RF-JABR01063291.1-ighv:0.05379,((V18RF-JABR01070187.1-ighv:0.05524,(V73RF-ABGA01194059.1-ighv:0.01901,(V88RF-JABR01035060.1-ighv:0.00054,(V52RF-AHZZ01104761.1-ighv:0.01063,(V3RF-JYKQ01005758.1-ighv:0.08266,V127RF-AQIB01153553.1-ighv:0.02126)0.000:0.00055)0.902:0.02115)0.859:0.03478)0.908:0.04934)0.773:0.04105,(V95RF-JABR01049702.1-ighv:0.05273,(V132RF-AQIB01153556.1-ighv:0.07782,(((V77RF-AHZZ01150255.1-ighv:0.04352,V213RF-AHZZ01096572.1-ighv:0.03220)0.759:0.01051,(V190RF-AQIA01075867.1-ighv:0.00055,(V182RF-AHZZ01084892.1-ighv:0.03292,V7RF-JYKQ01005771.1-ighv:0.07915)0.934:0.04381)0.981:0.05559)0.748:0.01068,(V113RF-AQIB01153511.1-ighv:0.01056,V135RF-JYKQ01245888.1-ighv:0.02134)0.799:0.01058)1.000:0.00054)0.743:0.01107)0.106:0.04519)0.741:0.01039)0.786:0.01064,V251RF-AHZZ01125719.1-ighv:0.01187)0.755:0.00920,((V201RF-AHZZ01090492.1-ighv:0.04420,V200RF-JYKQ01062881.1-ighv:0.03286)0.743:0.01127,V109RF-AQIB01153509.1-ighv:0.03265)0.674:0.01071)0.872:0.02169)0.802:0.01070,((V20RF-AHZZ01069455.1-ighv:0.03197,V18RF-JYKQ01005787.1-ighv:0.05145)0.954:0.06507,V10RF-JABR01059011.1-ighv:0.03012)0.758:0.01343)0.000:0.00054)0.802:0.01083,(V45RF-ABDC01375549.1-ighv:0.06028,(V17RF-ABDC01314388.1-ighv:0.16246,(V68RF-ABDC01407894.1-ighv:0.01091,(V7RF-ABDC01231274.1-ighv:0.03349,V70RF-ABDC01417489.1-ighv:0.02154)0.903:0.00054)0.750:0.01492)0.490:0.02178)0.725:0.00685)0.912:0.02182,(V61RF-AGCE01147865.1-ighv:0.11292,(((V122RF-ADFV01131961.1-ighv:0.01090,V146RF-ADFV01143437.1-ighv:0.04447)0.893:0.02231,(V86RF-JABR01035059.1-ighv:0.04552,(V118RF-AGCE01148199.1-ighv:0.06869,(V54RF-ABGA01099945.1-ighv:0.05942,(V179RF-AHZZ01084890.1-ighv:0.03259,V135RF-AQIB01153558.1-ighv:0.00053)0.866:0.03146)0.739:0.01497)0.820:0.01516)0.443:0.00053)0.801:0.01211,((((V139RF-AQIB01153566.1-ighv:0.02110,V131RF-JYKQ01245881.1-ighv:0.03458)0.749:0.01131,V237RF-AQIA01066366.1-ighv:0.01202)0.000:0.00055,((V16RF-AHZZ01069449.1-ighv:0.0,V14RF-JYKQ01005774.1-ighv:0.0):0.01087,V236RF-AQIA01066362.1-ighv:0.00054)0.920:0.02222)0.750:0.01108,V3RF-ABGA01025791.1-ighv:0.03464)0.727:0.00938)0.959:0.04426)0.000:0.00053)0.875:0.03601)0.959:0.13873)0.331:0.03315)0.735:0.01199,V41RF-AJFE01045037.1-ighv:0.05672)0.768:0.01099)0.756:0.01044,(((((V137RF-CABD02117477.1-ighv:0.05179,(V5RF-ABGA01025797.1-ighv:0.02646,V57RF-ABGA01099947.1-ighv:0.05341)0.523:0.02849)0.808:0.03260,V131RF-AQIB01153555.1-ighv:0.07676)0.697:0.01067,V57RF-ADFV01136793.1-ighv:0.01113)0.952:0.03593,((V156RF-AACZ03171037.1-ighv:0.01444,V40RF-AJFE01045037.1-ighv:0.01108)0.976:0.05815,((V21RF-ABGA01044310.1-ighv:0.05596,((V134RF-AQIB01153557.1-ighv:0.03904,V192RF-AQIA01075868.1-ighv:0.03170)0.981:0.08866,V156RF-ABGA01203420.1-ighv:0.05561)0.608:0.02895)0.856:0.03476,(V192RF-AQIB01086294.1-ighv:0.02428,V75RF-JYKQ01067073.1-ighv:0.03467)0.998:0.16718)0.795:0.02622)0.298:0.01019)0.000:0.00054,V52RF-ABGA01099941.1-ighv:0.06901)0.831:0.01053)0.897:0.00054,(V84RF-JABR01011024.1-ighv:0.06139,(((V45RF-JYKQ01041718.1-ighv:0.05284,V247RF-JYKQ01237599.1-ighv:0.02775)0.878:0.03620,((V25RF-AHZZ01091599.1-ighv:0.04489,(V126RF-AQIB01153553.1-ighv:0.02242,(V92RF-AQIB01153485.1-ighv:0.03422,(V51RF-AHZZ01104760.1-ighv:0.04939,(V89RF-AQIB01153482.1-ighv:0.04917,(V180RF-AHZZ01084890.1-ighv:0.01430,(V87RF-JABR01035059.1-ighv:0.08294,(V9RF-JYKQ01005772.1-ighv:0.01109,V240RF-AQIA01066378.1-ighv:0.03430)0.850:0.03001)0.813:0.02497)0.785:0.02344)0.769:0.01725)0.271:0.01171)0.854:0.03292)0.769:0.01746)0.404:0.02260,V182RF-AQIA01075862.1-ighv:0.01447)0.807:0.02770)0.775:0.01214,(V246RF-AQIA01066387.1-ighv:0.01141,(V53RF-AHZZ01104763.1-ighv:0.02223,V162RF-AQIA01075823.1-ighv:0.06032)0.418:0.01631)0.749:0.01229)0.952:0.05584)0.875:0.03188)0.919:0.03405,(((V118RF-CABD02117419.1-ighv:0.00054,(V137RF-JABR01077916.1-ighv:0.03340,(V219RF-AHZZ01103097.1-ighv:0.03438,(V138RF-JYKQ01245890.1-ighv:0.00055,V170RF-AQIA01075832.1-ighv:0.03438)0.772:0.01126)0.768:0.01278)0.976:0.06751)0.912:0.03016,((V11RF-JABR01059011.1-ighv:0.05985,V247RF-AQIA01066387.1-ighv:0.11480)0.836:0.02189,((((V114RF-ADFV01131951.1-ighv:0.00053,((V13RF-JYKQ01005774.1-ighv:0.03359,(V235RF-AQIA01066362.1-ighv:0.0,V239RF-AQIA01066369.1-ighv:0.0):0.03339)1.000:0.23319,((V109RF-AACZ03097919.1-ighv:0.0,V51RF-AJFE01045053.1-ighv:0.0):0.19822,V10RF-ABGA01025808.1-ighv:0.11786)0.563:0.01030)0.842:0.03201)0.152:0.02270,V125RF-ADFV01131961.1-ighv:0.01127)0.636:0.03395,((V100RF-AQIB01153501.1-ighv:0.00055,V46RF-JYKQ01041718.1-ighv:0.05817)0.941:0.04115,(V79RF-JABR01004697.1-ighv:0.05730,((V175RF-AHZZ01069458.1-ighv:0.07820,(V243RF-AQIA01066387.1-ighv:0.04560,V88RF-AQIB01153482.1-ighv:0.03262)0.000:0.00054)0.772:0.01210,(V110RF-AQIB01153509.1-ighv:0.02275,V158RF-AQIA01075814.1-ighv:0.03373)0.760:0.01683)0.907:0.05293)0.227:0.01188)0.961:0.06284)0.132:0.00054,(V119RF-CABD02117420.1-ighv:0.01081,((((((V106RF-ADFV01131940.1-ighv:0.04166,((V56RF-ABGA01099946.1-ighv:0.06886,(V149RF-CABD02136430.1-ighv:0.02258,(V175RF-AACZ03182257.1-ighv:0.01136,V203RF-AACZ03172648.1-ighv:0.00054)0.904:0.00053)0.952:0.04633)0.751:0.01173,V120RF-AJFE01045453.1-ighv:0.05618)0.744:0.01537)0.790:0.04033,V115RF-ABGA01384193.1-ighv:0.02341)0.338:0.01880,V72RF-ABGA01174999.1-ighv:0.11475)0.902:0.03815,((V252RF-AHZZ01125719.1-ighv:0.00055,V166RF-AQIA01075827.1-ighv:0.01085)0.998:0.08286,(V199RF-AHZZ01090491.1-ighv:0.01097,V198RF-JYKQ01062878.1-ighv:0.02197)0.884:0.02205)0.772:0.01108)0.874:0.00054,(V158RF-AACZ03171037.1-ighv:0.01133,(V120RF-AGCE01148386.1-ighv:0.08636,V42RF-AJFE01045041.1-ighv:0.01128)0.770:0.01107)0.808:0.01114)0.862:0.01176,(V117RF-ADFV01131956.1-ighv:0.06689,V119RF-AJFE01045447.1-ighv:0.08211)0.921:0.00055)0.777:0.01182)0.859:0.01802)0.805:0.01715)0.768:0.01382)0.724:0.01327,(V25RF-ABGA01044314.1-ighv:0.05894,(V55RF-JABR01091180.1-ighv:0.01349,V82RF-JABR01004698.1-ighv:0.21044)0.913:0.04495)0.754:0.02228)0.909:0.04385,(((((((V131RF-CABD02117467.1-ighv:0.12353,(V204RF-AACZ03172650.1-ighv:0.00055,(V174RF-AACZ03179884.1-ighv:0.01169,(V34RF-CABD02136430.1-ighv:0.0,V148RF-CABD02136430.1-ighv:0.0):0.02332)0.000:0.00054)0.878:0.02784)0.434:0.02302,(V116RF-CABD02117398.1-ighv:0.04754,V55RF-ABGA01099946.1-ighv:0.04832)0.815:0.02190)0.721:0.01319,(V19RF-JABR01070187.1-ighv:0.01818,(V127RF-JYKQ01245874.1-ighv:0.01131,V160RF-AQIA01075820.1-ighv:0.02315)0.854:0.02217)0.900:0.02962)0.415:0.00053,V12RF-ABGA01025810.1-ighv:0.05871)0.905:0.03512,((V9RF-ABDC01282056.1-ighv:0.13054,(V64RF-AGCE01147870.1-ighv:0.17193,(V46RF-ABDC01377237.1-ighv:0.05049,(V4RF-ABDC01231268.1-ighv:0.00055,V134RF-ABDC01493416.1-ighv:0.01150)0.931:0.03887)0.802:0.02450)0.763:0.01188)0.764:0.01375,((V15RF-JABR01066987.1-ighv:0.03533,(V196RF-JYKQ01056010.1-ighv:0.00054,V11RF-AHZZ01064615.1-ighv:0.04907)0.000:0.00053)0.956:0.06151,((V0RF-ABDC01047890.1-ighv:0.15374,V77RF-ABDC01423814.1-ighv:0.02402)0.378:0.02009,(((((((V125RF-CABD02117442.1-ighv:0.03338,V126RF-CABD02117444.1-ighv:0.00055)0.882:0.02918,(V110RF-AACZ03098145.1-ighv:0.03417,V113RF-AACZ03098176.1-ighv:0.03476)0.766:0.01606)0.900:0.04151,((V140RF-JABR01077917.1-ighv:0.04695,V185RF-AQIA01075862.1-ighv:0.05828)0.875:0.02621,((V90RF-JABR01035060.1-ighv:0.04462,(V129RF-CABD02117457.1-ighv:0.00763,V107RF-AACZ03097912.1-ighv:0.01450)0.989:0.10973)0.866:0.03427,((V80RF-ABGA01243345.1-ighv:0.01184,(V29RF-ABGA01058270.1-ighv:0.03381,V68RF-ABGA01174988.1-ighv:0.00055)0.954:0.04636)0.705:0.00541,(V90RF-JZKE01278271.1-ighv:0.08737,V115RF-ABDC01345813.1-ighv:0.04900)0.666:0.03209)0.790:0.01577)0.403:0.01122)0.792:0.02096)0.798:0.02789,(V131RF-ABDC01471087.1-ighv:0.07365,((V136RF-AQIB01153561.1-ighv:0.03318,(V186RF-AQIA01075862.1-ighv:0.01091,(V68RF-AHZZ01113072.1-ighv:0.02097,(V4RF-JYKQ01005763.1-ighv:0.01142,V10RF-JYKQ01005773.1-ighv:0.04327)0.309:0.01103)0.761:0.01137)0.742:0.01078)0.970:0.08035,(V134RF-CABD02117471.1-ighv:0.05478,(V161RF-AACZ03171037.1-ighv:0.02231,V117RF-AJFE01045439.1-ighv:0.01116)0.849:0.02215)0.453:0.01370)0.769:0.02496)0.852:0.05199)0.868:0.04564,V87RF-JZKE01278267.1-ighv:0.05638)0.729:0.01217,((((V98RF-JZKE01278609.1-ighv:0.04506,((V94RF-JZKE01278602.1-ighv:0.05509,(V99RF-JZKE01278610.1-ighv:0.06251,V103RF-JZKE01278614.1-ighv:0.06636)0.421:0.01559)0.831:0.02646,((V9RF-JZKE01244686.1-ighv:0.12451,((V75RF-JZKE01235368.1-ighv:0.03472,V86RF-JZKE01278255.1-ighv:0.00053)0.860:0.02955,V89RF-JZKE01278271.1-ighv:0.05305)0.414:0.01136)0.775:0.01181,((V83RF-JZKE01278248.1-ighv:0.06090,(V82RF-JZKE01255182.1-ighv:0.06289,(V81RF-JZKE01255181.1-ighv:0.01728,(V12RF-JZKE01244710.1-ighv:0.03816,V96RF-JZKE01278605.1-ighv:0.03552)0.869:0.02527)0.799:0.01234)0.834:0.00055)0.848:0.01992,(((V88RF-JZKE01278268.1-ighv:0.03353,V102RF-JZKE01278611.1-ighv:0.05682)0.875:0.00054,((V13RF-JZKE01244715.1-ighv:0.06545,(V91RF-JZKE01278273.1-ighv:0.00055,V95RF-JZKE01278602.1-ighv:0.05614)0.964:0.06998)0.771:0.02299,V30RF-JZKE01255160.1-ighv:0.09151)0.666:0.00308)0.740:0.01086,V97RF-JZKE01278607.1-ighv:0.01132)0.743:0.01427)0.679:0.00907)0.789:0.01084)0.892:0.00055)0.887:0.02184,(((V176RF-AHZZ01069458.1-ighv:0.02295,(V244RF-AQIA01066387.1-ighv:0.00053,(V137RF-JYKQ01245889.1-ighv:0.04810,(V212RF-AHZZ01096568.1-ighv:0.01136,(V115RF-AQIB01153511.1-ighv:0.06857,V169RF-AQIA01075832.1-ighv:0.01455)0.847:0.02195)0.783:0.01125)0.769:0.01119)0.796:0.01187)0.858:0.02261,V43RF-JYKQ01041713.1-ighv:0.01146)0.836:0.00054,V128RF-AQIB01153553.1-ighv:0.05822)0.811:0.01138)0.849:0.02219,(V84RF-JZKE01278249.1-ighv:0.06780,V92RF-JZKE01278276.1-ighv:0.03628)0.932:0.04451)0.768:0.01169,((((V106RF-AACZ03097910.1-ighv:0.00053,(V130RF-CABD02117463.1-ighv:0.05824,(((((V218RF-AHZZ01103094.1-ighv:0.00367,(V114RF-CABD02117395.1-ighv:0.06582,V124RF-AQIB01153543.1-ighv:0.00054)0.665:0.03298)0.859:0.02738,V140RF-JYKQ01245904.1-ighv:0.03443)0.415:0.02547,(V101RF-AQIB01153501.1-ighv:0.09884,V126RF-JYKQ01245874.1-ighv:0.04650)0.810:0.03190)0.079:0.00054,V79RF-JYKQ01086555.1-ighv:0.03352)0.919:0.00055,V118RF-AQIB01153537.1-ighv:0.04684)0.924:0.03693)0.913:0.00053)0.713:0.01535,(V27RF-ABGA01044319.1-ighv:0.03800,V10RF-JZKE01244690.1-ighv:0.10216)0.529:0.02898)0.878:0.03788,(V159RF-AACZ03171037.1-ighv:0.01171,V43RF-AJFE01045048.1-ighv:0.00055)0.769:0.00089)0.959:0.07154,V123RF-ABDC01396906.1-ighv:0.04489)0.874:0.03011)0.735:0.01085)0.744:0.03403,V32RF-AQIA01007915.1-ighv:0.20394)0.509:0.00824)0.898:0.04645)0.701:0.01118)0.803:0.01055)0.755:0.01597,(((V59RF-AGCE01147864.1-ighv:0.02329,(V66RF-AGCE01147875.1-ighv:0.05536,(V65RF-AGCE01147874.1-ighv:0.04703,V67RF-AGCE01147944.1-ighv:0.06652)0.390:0.03720)0.774:0.02753)0.547:0.02220,(((V105RF-AQIB01153507.1-ighv:0.04659,(V163RF-AQIA01075825.1-ighv:0.03714,V129RF-JYKQ01245876.1-ighv:0.04000)0.858:0.00060)0.428:0.01073,(V143RF-CABD02117499.1-ighv:0.00055,((V90RF-AACZ03097899.1-ighv:0.0,V3RF-AJFE01011110.1-ighv:0.0):0.00054,(V116RF-AACZ03106490.1-ighv:0.0,V1RF-AJFE01003265.1-ighv:0.0):0.05629)0.284:0.01079)0.921:0.02581)0.923:0.00054,((V75RF-ABDC01421861.1-ighv:0.10238,(V12RF-ABDC01282065.1-ighv:0.12544,(V44RF-ABDC01375549.1-ighv:0.0,V85RF-ABDC01454767.1-ighv:0.0):0.05956)0.080:0.00209)0.027:0.03244,(V10RF-ABDC01282057.1-ighv:0.03466,V43RF-ABDC01373301.1-ighv:0.02382)0.811:0.01917)0.921:0.04408)0.598:0.02268)0.853:0.02928,((V60RF-ABGA01099956.1-ighv:0.02621,((V17RF-JYKQ01005784.1-ighv:0.01140,(V19RF-AHZZ01069455.1-ighv:0.00055,V234RF-AQIA01066360.1-ighv:0.04628)0.905:0.02307)0.768:0.01199,(V23RF-AHZZ01069456.1-ighv:0.00054,V21RF-JYKQ01005789.1-ighv:0.01152)0.896:0.03396)0.586:0.02457)0.967:0.05563,(V117RF-CABD02117416.1-ighv:0.07360,(V117RF-AGCE01148188.1-ighv:0.07854,(V26RF-AHZZ01091599.1-ighv:0.14758,V57RF-AGCE01147750.1-ighv:0.14390)0.846:0.04467)0.790:0.02256)0.838:0.02812)0.704:0.00054)0.762:0.01411)0.843:0.01673,V70RF-AGCE01148057.1-ighv:0.06918)0.885:0.00054);
