# Supplementary material for: Iterative Variable Gene Discovery from Whole Genome Sequencing with a Bootstrapped Multiresolution Algorithm
Source: Comput Math Methods Med. 2019 Feb 11;2019:3780245. doi: 10.1155/2019/3780245 (PMC6388353; doi:10.1155/2019/3780245)
Supplement: Supplementary Materials — supp_materialsV2.pdf: this is an updated document, which includes new figures requested by the reviewer. sequences_alignments.zip: these are genome sequence files that are relevant for reproducing some of the results. [file 3780245.f1.zip › 3780245.f1/sequences_alignments/bstrp_iteration_3.fasta]

>V0RF-AJFE01000016.1-trdv |(1583, 1883)|2.97250008499|(0.996,0.986,0.991)|1
SSVAQKVTQAQSSVSMPVRKAVTLNCLHEASWWSYYIFWYKQLPSKEMIFLIRQGSDELN
AKSGRYSVNFKKAAKSVTLTISALQLEDSAKYFCALWE
>V1RF-AJFE01003265.1-ighv |(14098, 14407)|3.0|(1.000,1.000,1.000)|1
VQCEVQLVESGGGLVQPGGSLRLSCAASGFTFSSYWMHWVRQAPGKGLVWVSRINSDGSS
TSYADSLKGQFTISRDNAKNTLYLQMNSLRAEDMAVYYCTR
>V2RF-AJFE01011107.1-ighv |(15076, 15385)|2.94462728311|(0.998,0.999,0.955)|1
TYSQVQLVQSGHEVKQPGASVKVSCKASGYSFTTYGMNWVRQAPGQGLEWMGWFNTYTGN
PTYAQGFTGRFVFSMDTSVGTAYLQISSLKAEDTAMYYCAR
>V3RF-AJFE01011110.1-ighv |(45852, 46161)|3.0|(1.000,1.000,1.000)|1
VQCEVQLLESGGGLVQPGGSLRLSCAASGFTFSSYWMHWVRQAPGKGLEWVSRINSDGSS
TSYADSVKGRFTISRDNAKNTLYLQMNSLRAEDTAVYYCTR
>V4RF-AJFE01011110.1-ighv |(53572, 53887)|3.0|(1.000,1.000,1.000)|1
VQCEVQLVESGGGLVQPGGSLRLSCAASGFTFSGSAMHWVRQASGKGLEWVGRIRSKANS
YATAYAASVKGRFTISRDDSKNKAYLQMNSLKTEDTAVYYCTT
>V5RF-AJFE01011111.1-ighv |(11970, 12284)|1.8191340371|(0.906,0.593,0.744)|1
VLSQVTLKESGPALVKPTETLMLTCTFSGFSLSTSGMRVSWIHQPPGKALEWHACIDWDD
DKYYSTSLKTRLTISKDTSKNQVVLTMTNMDPVDTATYYCARI
>V6RF-AJFE01011111.1-ighv |(20882, 21191)|2.99180001921|(1.000,0.999,0.993)|1
VQSQVQLVQSGAEVKKPGSSVKVSCKVSGGTFSSYAISWVRQAPGQGLEWMGVIIPILGT
ANYAQKFQGRVTITADESTSTAYMELSSLRSEDTAVYYCAT
>V7RF-AJFE01011113.1-ighv |(30008, 30314)|3.0|(1.000,1.000,1.000)|1
VQCEVQLVESGGGLVQPGGSLRLSCAASGFTFSSYAMHWVRQAPGKGLEWVSLIYSGDST
YYADSVKGRFTISRDNSKNTLYLQMGSLRAEDTAVYYCAR
>V8RF-AJFE01011588.1-igkv |(6066, 6365)|3.0|(1.000,1.000,1.000)|1
ARCDIQVTQSPSSLSASVGDRVTITCRASQGISNGLSWYQQKPGQAPTLLIYAASSLQSG
IPSRFSGSGSGTDFTLTISSLQPEDVATYYCLQDYTTH
>V9RF-AJFE01012232.1-igkv |(670, 988)|2.99280401921|(1.000,0.993,1.000)|1
SSGDIVMTQAPLSLPITPGEPASISCRSSQSLLDSDDGNTYLDWYLQKPGQSPQLLIYTL
SYRASGVPDRFSGSGSGTDFTLKISRVEAEDVGVYYCMQHIEFP
>V10RF-AJFE01012232.1-igkv |(11186, 11479)|2.99899600001|(1.000,1.000,0.999)|1
ARCDIQMTQSPSSLSASVGDRVTITCRASQSISNYLSWYQQKPGKAPKLLIYYASTLQSG
VPSRFSGSGSGTDFTLTISSLQPEDFATYYCQHGYG
>V11RF-AJFE01012232.1-igkv |(33464, 33764)|2.99899600001|(1.000,0.999,1.000)|1
ARCDIQLTQSPSSLSASVGDRVTITCRASQGISSYLNWYQQKPGKVPKLLIYSASNLQSG
VPSRFSGSGSGTDFTLTISSLQPEDVATYYCQRTYNAP
>V12RF-AJFE01012232.1-igkv |(62717, 63017)|2.99899600001|(1.000,1.000,0.999)|1
ARCDIRMTQSPSSLSASVGDRVTITCQASQDISNYLNWYQQKPGKAPKLLIYDASNLETG
VPSRFSGSGSGTDFTFTISSLQPEDIATYYCQQYDNLP
>V13RF-AJFE01012234.1-igkv |(5885, 6200)|2.97411631225|(0.998,0.984,0.993)|1
SSGDVVMTQSPRSLPVTLGQPASISCRSSQSLVYSDGNTYLSWIQQRPGQPPRLLIYKVS
NRDSGVPDRFSGSGAGTDFTLKISRVEAEDVGVYYCVQGIQLP
>V14RF-AJFE01012234.1-igkv |(16459, 16774)|3.0|(1.000,1.000,1.000)|1
SSADIVMTQTPLSLSVTPGQPASISCKSSQSLLHSDGNTYLYWYLQKPGQSPQLLIYRVS
NRASGVPDRFSGSGSGTDFTLKISRVEAEDVGVYYCMQGIQLP
>V15RF-AJFE01012234.1-igkv |(28936, 29251)|2.99798400013|(1.000,0.998,1.000)|1
SSGDIVMTQSPLSLPVTPGEPASISCRSSQSLLHSNRYNYLDWYLQKPGQSPQLLIYLGS
NRASGVPDRFSGSGSGTDFTLKISRVEAEDVGVYYCMQALQTP
>V16RF-AJFE01012235.1-igkv |(6765, 7067)|3.0|(1.000,1.000,1.000)|1
SSGDIVMTQTPLSSPVTLGQPASISCRSSQSLVHSDGNTYLSWLQQRPGQPPRLLIYKVS
NRFSGVPDRFSGSGAGTDFTLKISRVEAEDVGVYYCTQA
>V17RF-AJFE01012235.1-igkv |(23412, 23710)|2.62968474289|(1.000,0.791,0.999)|1
SRGEIVLTQSPDFQSVPPKEKVTITCRASQSIGSSLHWYQQKPGQSPKLLIKYASQSISG
VPSRFSGSGSGTDFTLTINSLEAEDAATYYCQQSSSL
>V18RF-AJFE01012236.1-igkv |(7268, 7564)|2.99174403277|(1.000,0.992,1.000)|1
TTGEIVLMQSSATLSLSPGERATLSCRASQSVSSSYLAWYQQKPGQAPRLLIYDASTRAT
GIPDRFSGSGSGTDFTLTISRLEPEDFAVYYCQQYGS
>V19RF-AJFE01012238.1-igkv |(1220, 1535)|2.91389210257|(0.997,0.940,0.990)|1
SSGDIVMTQNPPSLPVNPGEPASISCRSSQSLLHSNGYTYLHWYLQKPGQSPQLLIYRVS
NRFSGIPDRFSGSGSGSDFTLKISWVEAEDVGVYYCMQATQFP
>V20RF-AJFE01012238.1-igkv |(18126, 18418)|2.45023083779|(0.905,0.755,0.879)|1
SRGDVVMTQSPAFLSVTPGEKVTITCQASEGIGNYLYWYQQKPDQAPKLLIKYASQSISG
VPSRFSGSGSGTDFTFTISSLEAEDAATYYRQQGN
>V21RF-AJFE01012238.1-igkv |(29982, 30282)|2.99798400013|(1.000,0.998,1.000)|1
ARCDIQMTQSPSSLSASVGDRVTITCRASQGISNYLAWFQQKPGKVPKRLIYAASSLQSG
VPSRFSGSGSGTEFTLTISSLQPEDFATYYCLQHNSYP
>V22RF-AJFE01012238.1-igkv |(62062, 62362)|2.96672055687|(0.992,1.000,0.976)|1
TTGEIVLTQSPATLSLSPGERATLSCRASQSVSSYLAWYQQKPGQAPRLLIYGASNRATG
IPARFSGSGSRTDFTLTISSVEPEDFAVYYCQQYNNQP
>V23RF-AJFE01012245.1-igkv |(2610, 2910)|3.0|(1.000,1.000,1.000)|1
ARCAIQLTQSPSSLSASVGDRVTITCRASQGISNRLNWYQQKPGKAPKLLIYDASSLESG
VPSRFSGSGSGTDFTLTISSLQPEDFATYYCQQFNSYP
>V24RF-AJFE01012249.1-igkv |(2485, 2785)|3.0|(1.000,1.000,1.000)|1
TTREIVLTQSPATLSLSPGEKATLSCRASQSVSSYLAWYQQKPGQAPRLLIYDASNRATG
IPARFSGSGSGTDFTLTISSLEPEDFAVYYCQQRSNWH
>V25RF-AJFE01016082.1-igkv |(1156, 1468)|2.84797432051|(0.943,1.000,0.920)|1
CNGDIVLTQSPASLAVSPGQRATITCRASESVSFLGINLIHWYQQKPGQPPKLLIYQASN
KDTGVPAGFSSSGSGTDFTLTINPVEANDTANYYCLQSKNFP
>V26RF-AJFE01024273.1-trdv |(100475, 100781)|3.0|(1.000,1.000,1.000)|1
RGMLCDKVTQSSPDQTVASGSEVVLLCTYDAVYSNPDLFWYRIRPDYSFQFVFYGDNSRS
QAADFTQGRFSVKHILTQKAFHLVISPVRTEDSATYYCAF
>V27RF-AJFE01038664.1-trgv |(28742, 29055)|2.96946712305|(1.000,0.997,0.975)|1
SQKSSNLEGRTKSVTRETRSSAEITCDLTVTNTFYIHWYLHQEGKAPQRLLYYDVSTARD
VLESGLSPGKYYTHTPRRWSWILRLQNLIENDSGVYYCATWD
>V28RF-AJFE01038665.1-trgv |(1085, 1398)|2.98994800078|(0.997,0.999,0.994)|1
SQKSSNLEGRTKSVIRQTGSSAEITCDLDGGSTGYIHWYLHQEGKAPQRLLYYDSYTSRV
VLESGISPGKYDTYGSTRKNLRLILRNLIENDSGVYYCATWD
>V29RF-AJFE01038666.1-trgv |(1901, 2214)|2.94155571893|(0.998,1.000,0.952)|1
SQKSSNLEGRMKSVTRPTGSSAEITCDLTVINAVYIHWYLHQEGKSPQRLLYYDVSNSRD
VLESGLSPGKYYTHTPRRWSWILRLQNLIENDSGVYYCATWD
>V30RF-AJFE01038666.1-trav |(16565, 16874)|1.59647085523|(0.588,0.587,0.473)|1
RMKSVTRPTGSSAVITCDLPVENAGYTHWYLHQEGKAPQRLLYYDSYNSRVVLESGISQE
KYHTYASTGKSLKFILENLIERDSGVYYCATWDRHSDSDLC
>V31RF-AJFE01039607.1-trbv |(115731, 116041)|1.78787049411|(0.609,0.699,0.534)|1
SMDTGITQTPKYLVTAMGSKRTMKREHLRHDSMYWYRQKAKKSLEFMFYYNCKEFIENKT
VPNHFTPECPDSSRLYLHVVALQQEDSAVYLCTSSQDTALQ
>V32RF-AJFE01039607.1-trbv |(117721, 118021)|2.98480001|(0.995,1.000,0.990)|1
LTEPEVTQTPSHQVTQMGQEVILRCVPISNHLYFYWYRQILGQKVEFLVSFYNNEISEKS
EIFDDQFSVERPDGSNFTLKIWSTKLEDSAMYFCASSE
>V33RF-AJFE01039607.1-trbv |(129949, 130246)|3.0|(1.000,1.000,1.000)|1
PIDTEVTQTPKHLVMGMTNKKSLKCEQHMGHRAMYWYKQKAKKPPELMFVYSYEKLSINE
SVPSRFSPECPNSSLLNLHLHALQPEDSALYLCASSQ
>V34RF-AJFE01039607.1-trbv |(137829, 138125)|3.0|(1.000,1.000,1.000)|1
PVEAGVTQTPRYLIKARGQQVTLSCSPISGHRSVSWYQQTPGQGLQFLFEYFSETQRNKG
NFPGRFSGRQFSNSRSEMNVSTLELGDSALYLCASSL
>V35RF-AJFE01039608.1-trbv |(1218, 1515)|3.0|(1.000,1.000,1.000)|1
PVNAGVTQTPKFQVLKTGQSMTLQCAQDMNHNSMYWYRQDPGMGLRLIYYSVGEGTTDKG
EVPDGYNVSRLNKREFSLRLESAAPSQTSVYFCASSE
>V36RF-AJFE01039609.1-trbv |(5245, 5558)|2.96265347361|(1.000,1.000,0.967)|1
PMEMGVTQTPRHLVMGMTNKKSLKCEQHLGHNAMYWYKQSAKKPLELMFVYNFKEQTENN
SVPSRFSPECPNSSHLFLHLHALQPEDSALYLCASSQDTALQ
>V37RF-AJFE01045032.1-ighv |(257, 569)|2.93700694193|(1.000,0.993,0.953)|1
VLSQVQLQQWGPGLVKPSETLSLTCAVYGGSISSSGYYWSWIRQPPGKGLEWIGEINHSG
STNYNPSLKSRVTISVDTSKNQFSLKLSSVTAADTAVYYCAR
>V38RF-AJFE01045035.1-ighv |(280, 602)|2.72900563293|(0.972,0.850,0.965)|1
VLSQVTLKESGPVLVKPTETLTLTCTISGFSLSNAGMGVSWIRQPPGKALEWLAHIFWND
EKSYSTSLKSRLTISKDTSKSQVVLTMTNMDPVDTATYYCTRRAQ
>V39RF-AJFE01045037.1-ighv |(4711, 5020)|2.994900005|(1.000,0.995,1.000)|1
THAQVQLVQSGAEVKKPGATVKISCKASGYTLTELSMHWVRQAPGKGLEWMGGFDPEDGE
TIYAQKFQGRVTMTEDTSTDTAYMELSSLRSEDTAVYYCAT
>V40RF-AJFE01045037.1-ighv |(12790, 13099)|2.99799600001|(0.999,0.999,1.000)|1
VQCEVQLVESGGGLVKPGGSLRLSCAASGFTFSNYYMHWVRQAPEKGLEWVSTISGSGGS
TWYPDSVKGRFTISRDNSKNTLYLQMNSLRAEDTAVYYCAR
>V41RF-AJFE01045037.1-ighv |(23646, 23958)|3.0|(1.000,1.000,1.000)|1
VQCEVQLVESGGGLVKPGGSLRLSCAASGFTFSSYSMNWVRQAPGKGLEWVAYISSPSGS
STYYADSVKGRFTISRDNSKNTLYLQMNSLRAEDTAVYYCAR
>V42RF-AJFE01045041.1-ighv |(1266, 1575)|3.0|(1.000,1.000,1.000)|1
VQCEVQLVESGGALVKPGGSLRLSCAASGFTFSSYGMHWVRQAPGKGLEWVSYISYDSSY
IYYADSVKGRFTISRDNAKNSLYLQMNSLRAEDTAVYYCAR
>V43RF-AJFE01045048.1-ighv |(1386, 1695)|3.0|(1.000,1.000,1.000)|1
VQCEVQLVESGGGLVQPGGSLRLSCAASGFTFDDYGMSWVRQAPGKGLEWVSLISWDGGS
TYYADSVKGRFTISRDNSKNSLYLQMNSLRAEDTALYYCAR
>V44RF-AJFE01045051.1-ighv |(2850, 3156)|2.99899600001|(1.000,1.000,0.999)|1
VLSQLQLQESGPGLVKPSETLSLTCTVSGGSISSYYWSWIRQPPGKGLEWIGNIYYSGSA
YYNPSLKSRVTISVDTSKNQFSLKLSSVTAADTAVYYCAR
>V45RF-AJFE01045051.1-ighv |(17267, 17573)|3.0|(1.000,1.000,1.000)|1
VQCEVQLVESGGGLVQPGGSLRLSCAASGFTVSSYHMSWVRQAPGKGLEWVSVIYSGGST
YYADSVKGRFTISRDNSKNTLYLQMNSLRAEDTAVYYCAR
>V46RF-AJFE01045051.1-ighv |(31190, 31497)|2.97754104219|(1.000,0.998,0.981)|1
VCAEVQLVQSGAEVKKPGESLKISCKGSGYSFTSYWIGWVRQMPGKGLEWMGIIYPGDSD
TRYSPSFQGQVTISADKSISTAYLQWSSLKASDTAMYYCA
>V47RF-AJFE01045051.1-ighv |(52919, 53234)|3.0|(1.000,1.000,1.000)|1
VQCEVQLVESGGGLVQPGRSLRLSCTASGFTFGDYAMSWIRQAPGKGLEWVGFIRSKAYG
GTTEYAASVKGRFTISRDDSKSIAYLQMNGLKTEDTAVYYCTR
>V48RF-AJFE01045051.1-ighv |(68146, 68452)|2.15798445271|(0.993,0.610,0.999)|1
VQCEDQLVESGGGLVQPGGSLRPSCAASGFAFSSYVLHWVRRAPGKGLEWVSAIGTGGDT
YYADSVMGRFTISRDNAKKSLYLQMNSLIAEDMAVYYCAR
>V49RF-AJFE01045051.1-ighv |(75870, 76179)|3.0|(1.000,1.000,1.000)|1
AHSQVQLVQSGAEVKKPGASVKVSCKASGYTFTSYTISWLRQAPGQGLEWMGVISPSDGS
TSYAQKFQGRVTMTRDTSTSTVYMELSSLRSEDTAVYYCAR
>V50RF-AJFE01045051.1-ighv |(79995, 80304)|3.0|(1.000,1.000,1.000)|1
AYSQMQLVQSGAEVKKPGSSVKVSCKASGYTFTYRYLHWVRQAPGQALEWMGWITPYNGN
TNYAQKFQDRVTITRDRSMSTAYMELRSLRSEDSAVYYCAR
>V51RF-AJFE01045053.1-ighv |(1090, 1399)|2.9689000027|(0.990,0.993,0.986)|1
VQCEVQLVESGGGLVQPGGSLRLSCAASGFTFSNSDTNWVHQAPGKGLELVSGVSWNGSR
MHYADSVKGRFIISRDNSRNSLYLQTNSLRAEDTAVYYCVR
>V52RF-AJFE01069974.1-trav |(29012, 29309)|2.59017965917|(0.992,0.773,1.000)|1
GLRAQSVAQPEDQVKVAEGNPLTVKCTYSVSGNPYLFWYVQYPNRGLQFLLKYITGDNLV
KGSYGFEAEFNKSQTSFHLKKPSALVSDSALYFCAVR
>V53RF-AJFE01069975.1-trav |(15309, 15599)|2.99899600001|(1.000,0.999,1.000)|1
MTRGEDVEQSLFLSVREGDSSVINCTYTDSSSTYLYWYKQEPGAGLQLLTYIFSNMDMKQ
DQRLTVLLNKKDKHLSLRIADTQTGDSAIYFCAES
>V54RF-AJFE01069975.1-trav |(34873, 35161)|3.0|(1.000,1.000,1.000)|1
VKSQKIEQNSEALNIQEGKTATLTCNYTNYSPAYLQWYRQDPGRGPVFLLLIRENEKEKR
KERLKVTFDTTLKQGVFHITASQPADSATYLCAL
>V55RF-AJFE01069975.1-trav |(49199, 49486)|2.99796800026|(0.998,1.000,1.000)|1
ANGENQVEHSPHFLGPQQGDVASMSCTYSVSRFNNLQWYRQNTGMGPKHLLSMYSAGYEK
QKGRLNAILLKNGSSLYITAVQPEDSATYFCAVD
>V56RF-AJFE01069975.1-trav |(63490, 63787)|2.13225286568|(0.869,0.811,0.646)|1
DARAQSVSQHNHHVILSEAASLELGCNYSYGGTVNLFWYVQYPGQHLQLLLKYFSGDPLV
KGIKGFEAEFIKSKFSFNLRKPSVQWSDTAEYFCAVN
>V57RF-AJFE01069975.1-trav |(77622, 77916)|2.99899200002|(0.999,1.000,1.000)|1
GINGDSVVQTEGQVLLSEGDSLIVNCSYETTQYPSLLWYVLYPGEGPQLLLKAMKANDNG
RNKGFEATYRKETTSFHLEKDSVQESDSAVYFCALS
>V58RF-AJFE01069975.1-trav |(91696, 91989)|3.0|(1.000,1.000,1.000)|1
GSGKNQVEQSPQSLIILEGKNCTLQCNYTVSPFNNLRWYKQDTGRGPVSLTIMTFSENTK
SNGRYTATLDADTKKSSLHITASQLSDSASYICVVS
>V59RF-AJFE01069975.1-trav |(107426, 107714)|3.0|(1.000,1.000,1.000)|1
VWSQRKEVEQDPGPFNVPEGATVAFNCTYSNSASQSFFWYRQDCRKEPKLLMSVYSSGNE
DGRFTAQLNRASQYISLLIRDSKLSDSATYLCAV
>V60RF-AJFE01069975.1-trav |(118638, 118935)|2.99799200002|(1.000,0.999,0.999)|1
TVRAQSVTQPDIHITVSEGASLELRCNYSYGATPSLFWYVQSPGQGLQLLLKYFSGDTLV
QGIKGFEAEFKRSQSSFNLRKPSVHWSDAAEYFCAVG
>V61RF-AJFE01069975.1-trav |(134910, 135200)|2.99798400013|(1.000,1.000,0.998)|1
VNGENVEQHPSTLSVQEGDGAVIKCTYSDSASNYFPWYKQELGKGPQLIIDIRSNMGEKK
DQRIAVTLNKTAKHFSLHITETQPEDSAVYFCAAS
>V62RF-AJFE01069975.1-trav |(154372, 154663)|3.0|(1.000,1.000,1.000)|1
VWSQQKEVEQNSGPLSVPEGAIASLNCTYSDRRSQSFFWYRQYSGKSPELIMSIYSNGDE
EDGRFTAQLNKASQYVSLLIRDSQPSDSATYLCAV
>V63RF-AJFE01069975.1-trav |(160863, 161160)|3.0|(1.000,1.000,1.000)|1
GTRAQSATQLDSHVSVSEGALVLLRCNYSSSVPPYLFWYVQYPNQGLQLLLKYTTGATLV
KGINGFEAEFKKSETSFHLTKPSAHVNDAAEYFCAVS
>V64RF-AJFE01069976.1-trav |(18238, 18531)|2.99899600001|(1.000,0.999,1.000)|1
VSRGESVGLHLPTLSVQEGDNSIINCAYSNSASDYFIWYKQESGKGPQFIIDIRSNMDKR
QGQRVTVLLNKTVKHLSLQIAATQPGDSAVYFCAEN
>V65RF-AJFE01069976.1-trav |(24122, 24425)|2.99899600001|(1.000,0.999,1.000)|1
PGIAQKITQTQPGMFVQEKEAVTLDCTYDTSDPSYGLFWYKQPSSGEMIFLIYQGSYDQQ
NATEGRYSLNFQKARKSANLVISASQLGDSAMYFCAVRE
>V66RF-AJFE01069976.1-trav |(40935, 41229)|3.0|(1.000,1.000,1.000)|1
RTRGDSVTQMEGPVTLSEEAFLTINCTYTATGYPSLFWYVQYPGEGLQLLLKATKADDKG
SNKGFEATYRKETTSFHLEKDSVQASDSAVYFCALS
>V67RF-AJFE01069976.1-trav |(65330, 65623)|2.99899200002|(0.999,1.000,1.000)|1
VWSQQKEVEQDPGPLSVPEGAIASLNCTYSNSAFQYFMWYRQYSRKGPELLMYTYSSGNK
EDGRFIAQVDTSSKYISLFIRDSQPSDSATYLCAMS
>V68RF-AJFE01069976.1-trav |(97788, 98075)|3.0|(1.000,1.000,1.000)|1
VNSQQGEEDPQALSIQEGENAIMNCSYKTSINNLQWYRQNSGRGLVHLILIRSNEREKHS
GRLRVTLDTSKKSSSLLITASRAADTASYFCATD
>V69RF-AJFE01069976.1-trdv |(107857, 108160)|3.0|(1.000,1.000,1.000)|1
SSMAQKVTQAQTEISVVEKEDVTLDCVYETRDTTYYLFWYKQPPSGELVFLIRRNSFDEQ
NEISGRYSWNFQKSTSSFNFTITASQVVDSAVYFCALSE
>V70RF-AJFE01069977.1-trav |(1078, 1365)|3.0|(1.000,1.000,1.000)|1
LSGEDQVTQSPEALRLQEGESSSLNCSYTVSGLRGLFWYRQDPGKGPEFLFTLYSAGEEK
EKERLKATLTKKESFLHITAPKPEDSATYLCAVQ
>V71RF-AJFE01069977.1-trav |(12990, 13289)|2.88955919449|(0.986,0.926,0.992)|1
VSSKQEVTQIPAALSVPEGDNLVLNCSFTDSAIYSLQWFRQDPGKGLTSLLLIQSSQREQ
TSGRLNASLDKSSGRSTLYIAASQPGDSATYLCAVRHS
>V72RF-AJFE01069977.1-trdv |(56532, 56832)|2.97250008499|(0.996,0.986,0.991)|1
SSVAQKVTQAQSSVSMPVRKAVTLNCLHEASWWSYYIFWYKQLPSKEMIFLIRQGSDELN
AKSGRYSVNFKKAAKSVTLTISALQLEDSAKYFCALWE
>V73RF-AJFE01070458.1-trbv |(41725, 42019)|2.41840236651|(0.902,0.738,0.882)|1
VRSQTIHQWPATLVQPVGSPLSLECTVEGTSNPNLYWYRQAAGRGLQVLFYSVGIGQISS
EVPQNLSASRPQDRQFILSSKKLLLSDSGFYLCAWS
>V74RF-AJFE01104359.1-trbv |(3464, 3764)|2.94630491943|(0.992,0.982,0.974)|1
SMDTKVTQRPRLLVKANEQKAKTDCVPIKRHSYVYWYHKTLEEELKFLIYFQNEEIIQKA
EIINERFSAQCPQNSPCTLEIQSTESGDTAWYFCANSK
>V75RF-AJFE01104359.1-trbv |(12388, 12688)|1.82962050244|(0.875,0.504,0.874)|1
CFHAKVTQTPGYLVKGKGRKTKMYYTPENGHTFVCWYQQNQNKEFMFLISFQNEQVLQEM
EMHKKRFSSQCPKNPPCSLAILSSEPGDTALYLCATSP
>V76RF-AJFE01104359.1-trbv |(36551, 36842)|3.0|(1.000,1.000,1.000)|1
LMEAEIYQTPRHRVIGTGKKITLECSQTMGHDKMYWSRSRNGITPHPPFLWVNSTEKGDL
SSESTVSRIRIERFPLTLESASPSHTSQYLCASSE
>V77RF-AJFE01104369.1-trbv |(8636, 8939)|2.99799600001|(0.999,0.999,1.000)|1
SVFSAVISQKPSRDICQRGTSMTIQCQVDSQVTMMFWYCQQPGQSMTLIATANQGSEATY
ESRFVIDKFPISRPNLTFSTLTVSNRRPEDSSIYLCSVE
>V78RF-AJFE01000028.1-igkv |(103568, 103886)|2.97523355494|(0.999,0.978,1.000)|-1
SSGDIVMTQTPLSLPVTPGEPASISCRSSESLLDTDDEYTYLNWYLQKPGQSPQLLIYEV
SNRASGVPDRFSGSGSGTDFTLKISRVEAEDVGVYYCMQALQTP
>V79RF-AJFE01002289.1-igkv |(593, 893)|3.0|(1.000,1.000,1.000)|-1
ARCDIQMTQSPSSLSASVGDRVTITCRASQGIRNDLGWYQQKPGKAPKLLIYAASSLQSG
VPSRFSGSGSGTDFTLTISSLQPEDFATYYCLQDYNYP
>V80RF-AJFE01002352.1-igkv |(655, 955)|3.0|(1.000,1.000,1.000)|-1
ARCAIRMTQSPSSLSASTGDRVTITCRASQGISSYLAWYQQKPGKAPKLLIYAASTLQSG
VPSRFSGSGSGTEFTLTISCLQSEDFATYYCQQYYSYP
>V81RF-AJFE01003455.1-igkv |(8866, 9184)|2.99389600501|(1.000,0.995,0.999)|-1
TSGDIVMTQTPLSLPVTPGEPASISCRSSQSLLDSDDGNAYLDWYLQKPGQSPQLLIYEV
SNWASGVPDRFSGSGSGTDFTLKISRVEAEDVGVYYCMQALQTP
>V82RF-AJFE01010527.1-trdv |(4455, 4755)|2.97250008499|(0.996,0.986,0.991)|-1
SSVAQKVTQAQSSVSMPVRKAVTLNCLHEASWWSYYIFWYKQLPSKEMIFLIRQGSDELN
AKSGRYSVNFKKAAKSVTLTISALQLEDSAKYFCALWE
>V83RF-AJFE01010527.1-trav |(11555, 11845)|2.98079201242|(0.997,0.991,0.993)|-1
VSSILNVEQSPQSLHVQEGDSTNFTCSFPSSNFYALHWYRWETAKSPEALFVMTLNGDEK
KTGRISATLNTKEGYSYLYIKGSQPEDSATYLCAF
>V84RF-AJFE01010827.1-iglv |(3125, 3428)|2.99074003277|(1.000,0.999,0.992)|-1
SVTSYVLTQPPSVSVAPEQTARITCGGNNIGSKSVHWYQQKPGQAPVLVIYDDSDRPSGI
PERFSGSKSGNTATLTISRVEAGDEADYYCQVWDSSSKH
>V85RF-AJFE01010827.1-iglv |(11046, 11349)|3.0|(1.000,1.000,1.000)|-1
SVVSSELTQDPAVSVALGQTVRITCQGDSLRSYYASWYQQKPGQAPVLVIYGNNNRPSGI
PDRFSGSSSGNTASLTITGAQAEDEADYYCSSLDSSGNH
>V86RF-AJFE01010827.1-iglv |(27044, 27354)|2.97170483945|(0.997,0.979,0.997)|-1
SWAQSALTQPPSVSGSPGQSVTISCTGTSSDVGSYNRVSWDQQPPGKAPKLMIYEVSKRP
SGVPDRFSGSKSGNTASLTISGLQAEDEADYYCSSYTSSST
>V87RF-AJFE01010828.1-iglv |(147, 450)|2.99899600001|(1.000,1.000,0.999)|-1
SVTSYVLTQPPSVSVAPGQTARITCGGNNIGSKSVHWYQQKPGQAPVLVVYDDSDQPSGI
PERFSGSKSGNTATLTISRVEAGDEADYYCQVWDSSSDH
>V88RF-AJFE01010829.1-iglv |(16809, 17106)|3.0|(1.000,1.000,1.000)|-1
SVASYELTQPSSVSVSPGQTARITCSGDVLAKNYARWFQQKPGQAPVLVIYKDSERPSGI
PERFSGSSSGTTVTLTISGAQVEDEADYYCYSAADNN
>V89RF-AJFE01010829.1-iglv |(39526, 39836)|2.32175424314|(0.897,1.000,0.663)|-1
SWAQSALTQPPSVSGSPGQSVTISCTGTSTDIGSYNTVSWYQQHPGKAPKLMIYDVRWRP
SGVPDRFSGSKSGNTASLTISGLQAEDEADYSCCSYAGSST
>V90RF-AJFE01010857.1-ighv |(227, 534)|2.89365038507|(0.986,0.998,0.925)|-1
AHSQVQLVQSGAEVKKPGASVKISCKASGYTFTSYGISWVRQAPGQGLEWMGWIDAYYGN
TNYAEKLQGRVTMTTDTSRRTAYMELRRLRSDHTAVYYCA
>V91RF-AJFE01017581.1-iglv |(4261, 4557)|2.99899600001|(1.000,0.999,1.000)|-1
SVASYELTQPPSVSVSPGQTASITCSGDKLGDKYAYWYQQKSGQSPVLVIYQDSKRPSGI
PERFSGSNSGNTATLTISGTQAMDEADYYCQAWDSST
>V92RF-AJFE01017582.1-iglv |(28022, 28320)|1.90752468897|(0.678,0.563,0.728)|-1
LCALPVLTQPPSASASLGASVKLTCTLSSEHSTYTIEWYQQRPGRSPQYIMEVKSDGSHS
KGDGIPDRFMGSSSGADRYLTISNLQSDDEAEYHCGE
>V93RF-AJFE01017584.1-iglv |(3557, 3860)|3.0|(1.000,1.000,1.000)|-1
SEASYELTQPPSVSVSPGQTARITCSGDALPKQYAYWYQQKSGQAPVLIIYEDSKRPSGI
PERFSGSSSGTMATLTISGAQVEDEADYYCYSTDSSGNH
>V94RF-AJFE01017584.1-iglv |(14566, 14876)|2.93435688246|(1.000,0.988,0.955)|-1
SWAQSALTQPPSASRSPGQSVTISCTGTSSDIGGYNYVSWYQQHPGKAPKLMIYEVSKRP
SGVPDRFSGSKSGNTASLTVSGLQAEDEADYYCSSYAGSNN
>V95RF-AJFE01017586.1-iglv |(12261, 12571)|2.97087023728|(0.998,1.000,0.975)|-1
SWAQSALTQPPSVSGSPGQSVTISCTGTSSDVGGYNYVSWYQQHPGTAPKLMIYDVSKRP
SGVPDRFSGSKSGNTASLTISGLQAEDEADYYCCSYAGSYS
>V96RF-AJFE01017587.1-iglv |(6592, 6895)|2.12251872534|(0.986,0.598,0.991)|-1
SATSYELTQPHSVSVATAQTARITCRGNNIGSKAVHWYQQKPGQDPVLVIYSDSNRPSGI
PERFSGSNSGNTATLTISRVEAGDEADYYCQVWDSSSDH
>V97RF-AJFE01020628.1-iglv |(6538, 6850)|2.99899600001|(1.000,0.999,1.000)|-1
SWAQSVLTQPPSVSGAPGQRVTISCTGSSSNIGAGYDVHWYQQLPGTAPKLLIYENNKRP
SGVPDRFSGSKSGTSASLAITGLQAEDEADYYCQSYDSSLSG
>V98RF-AJFE01020628.1-iglv |(24239, 24549)|2.70801491226|(0.930,0.836,0.992)|-1
SLSQPVLTQPPSFSASPGESARLTCTLPSDINVGSYNIYWYQQKPGSPPRYLLYYYSDSD
KGQGSGVPSRFSGSKDASANTGILVISGLQSEDAADYYCMI
>V99RF-AJFE01020631.1-iglv |(2749, 3058)|3.0|(1.000,1.000,1.000)|-1
SWAQSVLTQPPSVSGTPGQRVTISCSGSSSNIGSNTVNWYQQLPGTAPKLLIYSNNQRPS
GVPDRFSGSKSGTSASLAVSGLRSEDEADYYCAAWDDSLNG
>V100RF-AJFE01020631.1-iglv |(16910, 17217)|1.87601384869|(0.859,0.922,0.505)|-1
SNSQTVVTQEPSLTVSPGGTVTLTCASSIEAVTSGYYPNWFQQKPGQAPRALIYSTSNKH
SWTPARFSGSLLGGKAALTLSGAQPEDEAEYYCLLYYGGA
>V101RF-AJFE01020631.1-iglv |(24444, 24762)|2.99280401921|(1.000,0.993,1.000)|-1
SLSQPVLTQPTSLSASPGASARLTCTLRSGINVGSYYISWYQQKPGSPPRYLLNYYSDSD
KGQGSGVPSRFSGSKDASTNAGLLLISGLQSEDEADYYCAIWYS
>V102RF-AJFE01020632.1-iglv |(18572, 18882)|2.96128218009|(1.000,0.986,0.978)|-1
SLSQSVVTQPASLSASPGASASLTCTLRSGINVGTYRISWYQQKPGSPPRYLLRYKSDSD
KQQGSGVPSRFSGSKDASANAGILVISGLQSEDEADYYCMI
>V103RF-AJFE01020634.1-iglv |(1918, 2227)|3.0|(1.000,1.000,1.000)|-1
SWAQSVLTQPPSVSAAPGQKVTISCSGSSSNIGNNYVSWYQQLPGTAPKILIYDNNKRPS
GISDRFSGSKSGTSATLGITGLQTGDEADYYCGTWDSSLSA
>V104RF-AJFE01022795.1-iglv |(18504, 18811)|2.20338915132|(0.733,0.878,0.683)|-1
SVVQAGLTQPPSVSKGLRQTATLTCTGNSNNVGNQGAAWLQQHQGHPPKLLSYRNNNRPS
GISERFSASRSGNTASLTITGLQPEDEAEYYCSAWDSSLS
>V105RF-AJFE01022796.1-igkv |(38920, 39226)|1.79228102386|(0.638,0.540,0.913)|-1
SLSQPVLTQSSSASASLGSSVKLTCTLSSGHSSYIIAWHQQQPGKAPRYLMKLEGSGSYN
KGSGVPDRFSGSSSGADRYLTISNLQSEDEADYYCETWDS
>V106RF-AJFE01022796.1-iglv |(57629, 57936)|2.98989600501|(0.998,0.993,0.999)|-1
SWANFMLTQPHSVSESLGQTVTISCPRSSGSIASNYVQWYQQRPGSAPTTVIYEDNRRPS
GVPDRFSGSIDRSSNSASLTISGLKSEDEADYYCQSYDSS
>V107RF-AJFE01022798.1-iglv |(2606, 2906)|2.99599600001|(0.999,0.998,0.999)|-1
SLSQLVLTQSPSASASLGASVKLTCTLSSGHSSYAIAWHQQQPEKGPRYLMKLNSDGSHS
KGDGIPDRFSGSSSGAERYLTISSLQSEDEADYYCQTW
>V108RF-AJFE01022798.1-iglv |(70777, 71086)|3.0|(1.000,1.000,1.000)|-1
VDSQTVVTQEPPFSVSPGGTVTLTCGLSSGSVSTSYYPSWYQQTPGQAPRTLIYSTNTRS
SGVPGRFFGSIIGNKAALTITGAQADDESDYYCLLYMGSGI
>V109RF-AJFE01024275.1-trav |(5751, 6041)|1.67674627212|(0.769,0.502,0.683)|-1
GTSSNSVKQTGQITVSEGASVTMNCTSASTGYPTPFWYVQYPSKPLQLLQRETMENSKNF
GGGNIKDKNSPVVKYSVQVSDSAVYYCLLGDTVLK
>V110RF-AJFE01024275.1-trav |(11529, 11815)|1.68622761649|(0.575,0.527,0.595)|-1
VSAARNEVEQSPQDLTAQEGELITINCSYSVGINALHWLQQHPGGGIVSLFMLSSGKKKH
GRLIATINIQEKHSSLHITASHPRDSAIYICAV
>V111RF-AJFE01024276.1-trav |(19317, 19607)|3.0|(1.000,1.000,1.000)|-1
VSSEDKVVQSPLSLVVHEGDTVTLNCSYEVTNFQSLLWYKQEKKAPTFLFMLTSSGIEKK
SGRLSSILDKKELFSILNITATQTGDSAIYLCAVE
>V112RF-AJFE01024276.1-trav |(73725, 74027)|3.0|(1.000,1.000,1.000)|-1
FSMAQTVTQSQPEMSVQEAETVTLSCTYDTSESDYYLFWYKQPPSRQMILVIRQEAYKQQ
NATENRFSVNFQKAAKSFSLKISDSQLGDAAMYFCAYRS
>V113RF-AJFE01024276.1-trav |(95666, 95954)|3.0|(1.000,1.000,1.000)|-1
LSGELKVEQSPLFLSTQEGKNYTIYCNYSTTSDRLYWYRQDPGKSLESLFVLLSNGAVKQ
EGQLMASLDTKARLSTLHITAAVHDLSATYFCAV
>V114RF-AJFE01045431.1-ighv |(1008, 1322)|2.08487247511|(0.968,0.976,0.585)|-1
VLSQVTLKESGPTLVKPTQTLTLTCTFSGFSLSTSGVGVGWIRQPPGKALEWLALIYSDN
DKRYSPSLKSRLTITKDTSKNQVVLTMTNMDPVDTATYYCAHR
>V115RF-AJFE01045439.1-ighv |(4672, 4981)|3.0|(1.000,1.000,1.000)|-1
VQCEVQLVESGGGLVQPGGSLTLSCAASGFTFSSYWMSWVRQAPGKGLEWVANIKKDGSE
KYYADSVKGRFTISRDNAKNSLYLQMNSLRAEDTAVYYCAT
>V116RF-AJFE01045444.1-ighv |(1979, 2288)|3.0|(1.000,1.000,1.000)|-1
AHSQVQLVQSGAEVKKPGASVKVSCKASGYTFTSYDINWVRQATGQGLEWMGWMNPNSGN
TGYAQKFQGRVTMTRDTSISTAYMELSSLRSEDTAVYYCAR
>V117RF-AJFE01045447.1-ighv |(71, 380)|3.0|(1.000,1.000,1.000)|-1
VQCEVQLVESGGGVVQPGRSLRLSCAASGFTFSNYAMHWVRQAPGKGLEWVSVISSSGSY
IYYADSVKGRFTISRDNAKNSLYLQMNSLRAEDTALYYCAK
>V118RF-AJFE01045453.1-ighv |(639, 948)|3.0|(1.000,1.000,1.000)|-1
VQCQVQLVESGGGLVKPGGSLRLSCAASGFTFSNHYMSWIRQAPGKGLEWVSYISYDSSY
INYADSVKGRFTISRDNAKNSLYLQMNSLRAEDTAVYYCAR
>V119RF-AJFE01047586.1-igkv |(1119, 1419)|3.0|(1.000,1.000,1.000)|-1
TRCDIQMTQSPSSLSASVGDRVTITCRASQGISNYLAWYQQKPGKAPKLLIYYASRLESG
VPSRFSGSGSGTDYTLTISSLQPEDFATYYCQQYNSNP
>V120RF-AJFE01070459.1-trbv |(7045, 7343)|2.35410587611|(0.994,0.998,0.683)|-1
SMDADVTQTPRNRITKTGKRIMLECSQTKGHDRMYWYRQDPGLGLRLIYYSFDVKDINKG
EISDGYSVSRQAQAKFSLSLESAIPNQTALYFCATSD
>V121RF-AJFE01070459.1-trbv |(21089, 21386)|3.0|(1.000,1.000,1.000)|-1
LMEADIYQTPRYLVIGTGKKITLECSQTMGHDKMYWYQQDPGMELHLIHYSYGVNSTEKG
DLSSESTVSRIRTEHFPLTLESARPSHTSQYLCASSE
>V122RF-AJFE01070459.1-trbv |(65610, 65917)|2.21297660067|(0.930,0.643,0.921)|-1
PLEAQVTQNPRYLITVTGKKLTVTCFQNMNHEYMSWYRQDPGLGLRQIYYSINVEAIEKG
DVPEGYNVSRKEKRNFPLILESPSPNQTSLYFCASSLSTV
>V123RF-AJFE01070459.1-trbv |(70897, 71194)|3.0|(1.000,1.000,1.000)|-1
LVDVKVTQSSRYLVKRMGEKVFLECVQDMDHENMFWYRQDPGLGLRLIYFSSDVKMKEKG
DIPEGYSVSREKKERFSLILESASTNQTSMYLCASSI
>V124RF-AJFE01070459.1-trbv |(89682, 89985)|2.98758408012|(1.000,0.990,0.998)|-1
SVFSAVISQKPSRDICQRGTSLTIQCQVDSQVTMMFWYRQQPGQSPTLIATANQGSEATY
ETGFVIDKFPISRPNLTFSTLTVSNMSPEDSSIYLCSVE
>V125RF-AJFE01070460.1-trbv |(14989, 15285)|2.95738267424|(0.999,0.965,0.998)|-1
LSNAGVMQNPRHLVRRRGQEARLRCSPVKGHNHVYWYRQLPEEGLKFMVYLQKENIIDES
GMPKERFSAEFPKEGPSILRIQQAVRGDSAAYFCASS
>V126RF-AJFE01070460.1-trbv |(18108, 18405)|3.0|(1.000,1.000,1.000)|-1
TVDGGITQSPKYLFRKEGQNVTLNCEQNLNHDAMYWYRQDPGQGLRLIYYSQIVNDFQKG
DIAEGYSVSREKKESFPLTVTSAQKNPTAFYLCASSI
>V127RF-AJFE01070460.1-trbv |(35929, 36229)|2.89730326411|(0.994,0.934,0.984)|-1
STDTKVTQRPRLLVKASEQKAKMDCVPIKGHSYVYWYRKKLEEELEFLVYFQNEELIQKA
EIINERFLAQCPKNSSCTLEIQSTESGDTALYFCASSK
>V128RF-AJFE01070460.1-trbv |(44986, 45286)|2.99899600001|(1.000,1.000,0.999)|-1
SFHAKVTQTPGHLVKGKGQKTKMDCTPEKGHVFVYWYQQNQNKEFMLLISFQNEQVLQET
EMHKTRFSSQCPKNTPCSLAILSSEPGDTALYLCASSQ
>V129RF-AJFE01070461.1-trbv |(12301, 12601)|2.97007231762|(0.993,0.999,0.979)|-1
LIDAGVTQTPRHKVTEMGQEVTMRCQPILGHNTVFWYRQTMMQGLELLAYFRNRAPLDDS
GMPKDRFSAEMLDATLATLKIQPSEPRDSAVYFCASGL
>V130RF-AJFE01070461.1-trbv |(19125, 19425)|2.9843881665|(1.000,0.997,0.988)|-1
HKEAGVTQFPSHSVIEKGQTVTLRCDPISGHDNLYWYRRVMGKEIKFLLHFVRESKQDES
GMPNNRFLAERTGGTYSTLKVQPAELEDSGVYFCASSQ
>V131RF-AJFE01070461.1-trbv |(29248, 29548)|2.99899600001|(1.000,1.000,0.999)|-1
SPGEEVTQTPKHLVRGEGQKAKLYCAPIKGHSYVFWYQQVLKKEFKFLISFQNENVFDKT
GMPKERFSAKCLSNSPCSLEIQATKLEDSAVYFCASSQ
>V132RF-AJFE01070462.1-trbv |(12014, 12314)|2.95204798746|(0.996,0.961,1.000)|-1
LIEAGVVQSPRYKIIEKKQPVAFWCNPISGHNTLYWYWQNLGQGPELLIRYENEEAVDDS
QLPKDRFSAERLKGVDSTLKIQPAELGDSAVYLCASSL
>V133RF-AJFE01070462.1-trbv |(17609, 17909)|3.0|(1.000,1.000,1.000)|-1
HTDAGVIQSPRHEVTEMGQEVTLRCKPISGHNSLFWYRQTMMQGLELLIYFNNNVPIDDS
GMPKDRFSAKMPNASFSTLKIQPSEPRDSAVYFCASSL
>V134RF-AJFE01070463.1-trbv |(1165, 1465)|2.99593600205|(1.000,1.000,0.996)|-1
HTGAGVSQTPSNKVTEKGKDVELRCDPISGHAALYWYRQSLGQGPEFLIYFRGTGAADDS
GLPNDRFFAVRPEGSVSTLKIQRTEQGDSAVYLCASSL
>V135RF-AJFE01070463.1-trbv |(5986, 6282)|2.27792896926|(0.972,0.679,0.926)|-1
PVEAGVTQSLTHLIKTRGQQVTLRCSPISGHSSVSWYQQALGQGHQFISEYANELRRSEG
NFPNRFSGRQFHDYCSEMNVSALELGDSALYLCARSL
>V136RF-AJFE01070463.1-trbv |(16689, 16977)|2.34157577972|(0.921,0.670,0.995)|-1
AEITQSPRHKITETGRQVTLVCHQTWNHNNMFWYRQDLGHGLRLIHYSYGVQDTNKGEVS
DGYSVSRSNTEDFPLTLESAASSQTSVYFCASSE
>V137RF-AJFE01070463.1-trbv |(24431, 24731)|2.99798400013|(1.000,1.000,0.998)|-1
LSEAEVAQSPRYKITEKSQAVAFWCDPISGHATLYWYRQILGQGPELLVQFQDESVVDDS
QLPKDRFSAERLKGVDSTLKIQPAELGDSAMYLCASSL
>V138RF-AJFE01070463.1-trbv |(57682, 57982)|2.46954805197|(0.823,0.831,0.816)|-1
CTDAGIIQSPKHEVTEMGQTVTLRCEPIFGHNLLFWYRDTFVQGLELLSYFRSRSIIDNA
GMPTDRFSAERPDGSFSTLKIQPAEQGDSAVYVCASRL
>V139RF-AJFE01070463.1-trbv |(67763, 68060)|2.99385601037|(1.000,1.000,0.994)|-1
PVNGGVTQTPKFQVLKTGQSMTLQCAQDMNHDYMYWYRQDPGMGLRLIHYSAGAGITDKG
EVPNGYNVSRSNTEDFPLSLVSAAPSQTSVYFCASSY
>V140RF-AJFE01070463.1-trbv |(71976, 72276)|3.0|(1.000,1.000,1.000)|-1
HTGAGVSQSPRYKVAKRGRDVALRCDSISGHVTLYWYRQTLGQGSEVLTYFRSDAQRDKS
GRPSGRFSAERPERSVSTLKIQRTEQGDSAVYLCASSL
>V141RF-AJFE01070463.1-trbv |(79903, 80199)|2.99899600001|(1.000,0.999,1.000)|-1
SVETGVTQSPTHLIKTRGQQVTLRCSPQSGHNTVSWYQQALGQGPQFIFQYYREEENGRG
NFSPRFSGRQFPNYSSELNVNALELDDSALYLCASSL
>V142RF-AJFE01070463.1-trbv |(86346, 86643)|2.99899600001|(1.000,0.999,1.000)|-1
PVNAGVTQTPKFRILKIGQSMTLQCAQDMNHNYMYWYRQDPGMGLKLIYYSVGAGITDKG
EVPNGYNVSRSTTEDFPLRLESAAPSQTSVYFCASSY
>V143RF-AJFE01070463.1-trbv |(99363, 99659)|2.99798400013|(1.000,0.998,1.000)|-1
PVDAGVTQSPTHLIKTRGQHVTLRCSPISGHKSVSWYQQALGQGPQFIFEYYEKEERGRG
NFPDRFSARQFPNYSSELNVNALLLGDSALYLCASSL
>V144RF-AJFE01070463.1-trbv |(104634, 104931)|2.01715770942|(0.666,0.636,0.741)|-1
PMNAGVTQTPKFHVLKTGQSMTLLCAQDMNHEYMYRYRQDPGKGLRLIYYSVAAALTDKG
EVPNGYNVSRSNTEDFLLKLESAAPSQTSVYFCASSY
>V145RF-AJFE01070463.1-trbv |(108994, 109294)|2.99698000014|(0.998,1.000,0.999)|-1
HTGAGVSQSPRYKVTKRGQDVTLRCDPISGHVALYWYQQALGQGPEFLTYFNYEAQPDKS
GLPNDRFSAERPEGSNSTLTIQRTEQRDSAMYLCASNL
>V146RF-AJFE01070463.1-trbv |(116814, 117110)|2.99599600001|(0.999,0.998,0.999)|-1
SVDAGVTQSPIHLIKTRGQQVTLRCSPQSGHDTVSWYQQVLGQGPQCIFEYYEEEERQRG
NFPDRFSGHQFPNYSSELNVNALLLGDSALYLCASSL
>V147RF-AJFE01070463.1-trbv |(124111, 124405)|2.81353995204|(0.989,0.935,0.920)|-1
PVNAGVTQTPKFRILKTGQSMTLQCARDMNHGYMSWYRQDPGMGLRLIYYSAAAGTTDKE
VPNGYNVSRLNTEDFPLRLVSAAPSQTSVYFCASSY
>V148RF-AJFE01070463.1-trbv |(128406, 128706)|2.99696400065|(1.000,1.000,0.997)|-1
HTGAGVSQSPRYKVTKRGQDVTLRCDPISSHATLYWYQQALGQGPEFLTYFNYEAQPDKS
GLPNDRFSAERPEGSISTLTIQRTEQRDSAMYLCASSL
>V149RF-AJFE01070463.1-trbv |(136837, 137133)|3.0|(1.000,1.000,1.000)|-1
PVDAGVTQSPTHLIKTRGQHVTLRCSPISGHTSVSWYQQALGQGPQFIFQYYEKEERGRG
NFPDRFSARQFPNYSSELNVNALLLGDSALYLCASSL
>V150RF-AJFE01070463.1-trbv |(144146, 144443)|2.99899600001|(1.000,0.999,1.000)|-1
PVNAVVTQTPKFQVLKTGQSMTLQCAQDMNHDCMSWYRQDPGMGLRRIHYSVAAGITDKG
EVPDGYNVSRSNKEDLPLRLESAAPSQTSVYFCASSY
>V151RF-AJFE01070463.1-trbv |(148806, 149106)|2.99899600001|(1.000,0.999,1.000)|-1
HTGAGVSQSPKYKVTKRGQDVALRCDPISGHVSLFWYQQALGQGPEFLTYFRNEAQLDKS
GLPSDRFFAERPEGSVSTLKIQRTQQEDSAVYLCASSL
>V152RF-AJFE01070463.1-trbv |(157011, 157307)|3.0|(1.000,1.000,1.000)|-1
PVEAGVTQSPTHLIKTRGQQVTLRCSPISGHTSVYWYQQALGLGLQFLLWYDEGEERNRG
NFPRRFSGRQFPNYSSELNVNALELEDSALYLCASSL
>V153RF-AJFE01070463.1-trbv |(166234, 166534)|3.0|(1.000,1.000,1.000)|-1
HADTGVSQDPSHKITKRGQNVTFRCDPISEHNRLYWYRQTLGQGPEFLTYFQNEAQLEKS
RLLSDRFSAERPKGSFSTLEIQHTEQGDSAIYLCASSL
>V154RF-AJFE01070463.1-trbv |(172755, 173052)|3.0|(1.000,1.000,1.000)|-1
SVAAGVIQSPRYLIKEKRETATLKCYPIPRHDTVYWYQQGPGQDPQFLISFYEKMQSDKG
SIPDRFSAQQFSDYHSELNMSSLELGDSALYFCASSS
>V155RF-AJFE01070464.1-trbv |(8813, 9110)|3.0|(1.000,1.000,1.000)|-1
PLDTAVSQTPKYLVTQMGKKESLKCEQNLGHNAMYWYKQDSKKFLKTMFIYSNKEPILNE
TVPNRFSPDSPDKAHLNLHINSLELGDSAVYFCASSQ
>V156RF-AJFE01070464.1-trbv |(12266, 12563)|3.0|(1.000,1.000,1.000)|-1
PMEMGVTQTPRHLVMGMTNKKSLKCEQHLGHNAMYWYKQSAKKPLELMFVYSLEERVENN
SVPSRFSPECPNSSHLFLHLHTLQPEDSALYLCASSQ
>V157RF-AJFE01070464.1-trbv |(20566, 20863)|2.99899600001|(1.000,0.999,1.000)|-1
PVNAGVTQTPKFRVLKTGQSMSLLCAQDMNHEYMYWYRQDPGMGLRLIHYSVGEGTTAEG
EVPDGYNVSRLKKQNFLLGLESAAPSQTSVYFCASSY
>V158RF-AJFE01070464.1-trbv |(52077, 52374)|3.0|(1.000,1.000,1.000)|-1
PVIAGITQAPTSQILAAGRSMTLRCTQDMRHNAMYWYRQDLGLGLRLIHYSNTAGTTGKG
EVPDGYSVSRANTDDFPLTLASAVPSQTSVYFCASSD
>V159RF-AJFE01070465.1-trbv |(4903, 5200)|2.99899200002|(0.999,1.000,1.000)|-1
PVNAGVTQSPKFRVLKTGQSMTLQCAQDMNHNYMYWYRQDPGMGLRLIHYSAGEGTTAKG
EVPDGYNVSRLNTQNFLLRLESAAPSQTSVYFCATSE
>V160RF-AJFE01119867.1-ighv |(1662, 1971)|2.91508424741|(0.982,0.981,0.955)|-1
AQSRVQLAQSGAEVKKPGASVKVSCKASGYTFTSYRMHWVCQAHAQGLEWMGLVCPSDGS
TSHAQKFQGRVTITRDTSMSTAYMELSSLRSEDTAMYYCVR
>V161RF-AJFE01119883.1-ighv |(31777, 32092)|2.99899200002|(0.999,1.000,1.000)|-1
VQCEVQLVESGGGLVQPGGSLRLSCAASGFTFSDHYMSWVRQAQGKGLELVRLIRNKANS
YTTEYAASVKGRFTISREDSKNTLYLQMSSLKTEDLAVYYCAR
>V0RF-AQIA01007569.1-iglv |(1992, 2302)|2.50365647942|(0.991,0.942,0.765)|1
SWAQSAPIQSPSVSGSLGQSVTISCTGTSSDIGRYNYVSWYRQQPGTTTKLMMYKVNMRP
SGVSDRFSGSKSGNTASLTISGLQAEDEADYYCSSYEASDT
>V1RF-AQIA01007574.1-iglv |(14067, 14370)|2.99899600001|(1.000,0.999,1.000)|1
SWAQAAPTQPPSVSGSPGQSVTISCTGTSSDIGGYNRVSWYQQHPGKAPKLMIYEVSKRP
SGVSDRFSGSKSGNTASLTISGLQAEDEADYYCSSYAGS
>V2RF-AQIA01007574.1-iglv |(23703, 24024)|1.53313221383|(0.539,0.508,0.497)|1
SVVSSELAQESAVSVALLQMARRITCQGDGIGNYYTNWCQQKPGRALVGVTCGNNCPSGI
PDKFSGSKSEKKAILTITGTQVEDEADYYFLSRQQWYSSHSDITH
>V3RF-AQIA01007574.1-iglv |(37774, 38077)|3.0|(1.000,1.000,1.000)|1
SAASYELTQPPSVSVSPGQTARITCSGDALPKKYAYWFQQKPGQSPVLIIYEDSKRPSGI
PERFSGSSSGTVATLTISGAQVEDEADYYCYSTDSSGNH
>V4RF-AQIA01007574.1-iglv |(45212, 45518)|2.23561713193|(0.901,0.661,0.881)|1
SVASYELTQPLSVSVALGQMARITCGGNNIGRKYVYWYQQKPDQAPVLVIYEDSKRPSGI
PEQFSGSNSGNTATLTIDGAQARDEADYYCQVWDSSTAHS
>V5RF-AQIA01007574.1-iglv |(48578, 48881)|2.99899600001|(1.000,1.000,0.999)|1
SWAQAALTQPPSVSGSPGQSVTISCTGTSSDIGGYNRVSWYQQHPGKAPKLMIYEVSKRP
SGVSDRFSGSKSGNTASLTISGLQAEDEADYYCSSYASS
>V6RF-AQIA01007575.1-iglv |(6771, 7074)|3.0|(1.000,1.000,1.000)|1
SWAQAALTQPPSVSGSPGQSVTISCTGTSSDVGGYNYVSWYQQHPGKAPKLMIYDVSKRP
SGVSDRFSGSKSGNTASLTISGLQAEDEADYYCSSYAGS
>V7RF-AQIA01007575.1-iglv |(13644, 13949)|2.55018382077|(0.930,0.756,0.995)|1
SVASYELTQPPSVSVSPGQTAKITCSGEILAKKYARWFQQKPGQAPVLVIYKDSERPSGI
PERFSGSSSGTTVTLTVSGAQAEDEADYYCYSGDDNSLTV
>V8RF-AQIA01007576.1-iglv |(8743, 9046)|3.0|(1.000,1.000,1.000)|1
SAVSYELTQPPSVSVSPGQTARITCGGDNLGSKYVHWYQQKPAQAPVLVIYYDSDRPSGI
PERFSGSKSGNTATLTISGVEAGDEADYYCQVWDSSSDH
>V9RF-AQIA01007576.1-iglv |(19712, 20015)|3.0|(1.000,1.000,1.000)|1
SWAQAALTQPRSVSGSPGQSVTISCTGTSSDIGGYNYVSWYQQHPGTAPKLMIYEVSKRP
SGVSDRFSGSKSGNTASLTISGLQAEDEADYYCCSYAGS
>V10RF-AQIA01007576.1-iglv |(29309, 29606)|2.20253557758|(0.692,0.824,0.797)|1
SVASYELTQPPLVSVSPGQTARITCSGDVLKENYADWYQQKPGQAPVLLIHEDSKRPSGI
PERFSGSTSGHTTTLTISSTLSEDEADYSCFSGNENN
>V11RF-AQIA01007576.1-iglv |(37606, 37909)|2.97138527945|(0.997,0.977,0.999)|1
SAASYDVTQPRSVSVSPGQTARITCGGDNIGSKVVHWYQQKPAQAPVLVIYRDSNRPSGI
PERFSGSNSGNTATLTISGVEAGDEADYYCQVWDSSSDH
>V12RF-AQIA01007576.1-iglv |(45242, 45545)|3.0|(1.000,1.000,1.000)|1
SVVSSELTQDPAVSVALGQTVRITCQGDSLRSYYASWYQQKPGQAPVLVVYGNNNRPSGI
PERFSGSSSGNTASLTITGAQVEDEADYYCDSWDSSGTH
>V13RF-AQIA01007576.1-igkv |(63773, 64083)|2.62854816475|(0.960,0.817,0.933)|1
SWAQAALTQPPSVSKSLGQSVTISCAGTSSGIASYSDVSWYQQHPGTAPRLLIYRVSNRP
SGVSDRFSGFKSGSTASLTISGLQAEDEAIYYCCSYRSGST
>V14RF-AQIA01007576.1-iglv |(72187, 72490)|2.99696400065|(1.000,0.997,1.000)|1
SATSYELTQPPSVSAASGQTARITCGGDNIGSKNVQWYQQKPAQAPVLVIYADSDRPSGI
PERFSGSNSGNTATLTISGVEAGDEADYYCQVWDSSSDH
>V15RF-AQIA01007584.1-iglv |(1279, 1588)|2.99899200002|(0.999,1.000,1.000)|1
SWAQSVLTQPPSASEAARKSVTISCSGSSSNIGSNSVSWYQQLPGTAPKLLIYYNDQRAS
GVSDRFSGSKSGTSASLAISGLQTEDEADYYCAAWDDSLSG
>V16RF-AQIA01007585.1-iglv |(7569, 7879)|2.68346443736|(0.991,0.979,0.822)|1
SLSQPVLTQPASLSASPGASASLTCTFSGGINVAGYHIFWYQQKPGSPPRYLLRYKSDSD
KGQGSGVPSRFSGSKDASANTGILRISGLQSEDEADYYCAI
>V17RF-AQIA01007586.1-iglv |(17179, 17489)|2.98548011776|(1.000,0.997,0.989)|1
SLSQPVLTQPTSLSASPGASARLSCTLSSGINVGSYSIYWYQQKPGSPPRYLLYYYSDSS
KHQGSGVPSRFSGSKDASANAGLLLISGLQSEDEADYYCAI
>V18RF-AQIA01007586.1-iglv |(27894, 28201)|2.99392000218|(0.996,1.000,0.998)|1
SWAQSVLTQPPSVSAVPGQKVTISCSGSSSNIGRSCVSWYQQVPGTAPKLLIYQDNKRPS
GVSDRFSGSKSGTSASLAITGLQTGDEADYYCSAWDSSLS
>V19RF-AQIA01007586.1-iglv |(32056, 32365)|2.98851611711|(1.000,1.000,0.989)|1
SWAQSVLTQPPSVSGDPGQRVTISCTGSSSNIGGYDVYWYQQLPGTAPKLLIYENNKRPS
GVSDRFSGSKSGTSASLAITGLQSEDEAEYYCETWDNSLNG
>V20RF-AQIA01007586.1-iglv |(37066, 37373)|2.99798400013|(1.000,1.000,0.998)|1
SWAQSVLTQPPSVSGDPGQRVTISCTGSSSNIGGYYVYWYQQFPGTAPKLLIYDNNKRPS
GVSDRFSGSKSGTSASLTITGLQPGDEADYYCGAWDSSLS
>V21RF-AQIA01007586.1-iglv |(42885, 43192)|2.98070483945|(1.000,1.000,0.982)|1
SWAQSVLTQPPSVSGAPGQRVTISCTGSSSNIGGYYVSWYQQLPGTTPKLLIYQDNKRPS
GVSDRFSGSKSGTSASLTITGLQTEDEADYYCLSYDSSLS
>V22RF-AQIA01007587.1-iglv |(5318, 5628)|2.94926255615|(1.000,0.959,0.997)|1
SLSQPVLTQPTSLSASPGASVRLTCTLRSGISVGGYNIHWYQQKPGSPPRYLLYYYSDSN
KGQGSGVPSRFSGSKDASANAGILLISGFQSEDEADYYCTT
>V23RF-AQIA01007587.1-iglv |(10143, 10452)|3.0|(1.000,1.000,1.000)|1
SWAQSVLTQPPSASGAPGQSVTISCSGSSSNIGSNYVNWYQQLSGKAPKLLIYNNNQRPS
GVPDRFSGSKSGTSASLAISGLQSEDEADYYCAAWDSSLSG
>V24RF-AQIA01007588.1-iglv |(1406, 1715)|2.99899600001|(1.000,0.999,1.000)|1
SWAQSVLTQPPSASGAPGQSVTISCSGSSSNIGSNDVYWYQQFPGTAPKLLIYYSNQRPS
GVPDRFSGSKSGTSASLAITGLRSEDEADYYCAAWDDSLSS
>V25RF-AQIA01007588.1-iglv |(19880, 20189)|2.91623800393|(0.999,0.934,1.000)|1
SWAQSVLTQPPSASGAPGQSVTISCSGSSSNIRGNGVHWYQQLSGMAPKLLIYNNNQRPS
GVPDRFSGSKSGTSASLAITGLRSEDEADYYCEAWDNSLSG
>V26RF-AQIA01007589.1-iglv |(4140, 4447)|3.0|(1.000,1.000,1.000)|1
SWAQSVLTQPPSVSGAPGQRVTISCTGSSSNIGGYYVQWYQQLPGTAPKLLIYENNKRPS
GVSDRFSGSQSGTSASLTITGLQSEDEADYYCQSYDSSLS
>V27RF-AQIA01007589.1-iglv |(26788, 27098)|2.97880866856|(1.000,0.983,0.997)|1
SLSQPVLTQPTSLSASPGASARLTCTLSSGISVGSYRIFWYQQKPGSPPRYLLNYHTDSD
KHQGSGVPSRFSGSKDASANAGILLISGLQSEDEADYYCMI
>V28RF-AQIA01007590.1-iglv |(12131, 12441)|2.99593600205|(1.000,0.996,1.000)|1
SWAEVVFTQPHSVSGSPGQTVTISCTRSSGSIGSSYVYWYQQRPGSAPTTVIYKDNQRPS
GVPDRFSGSIDSSSNSASLTISGLKSEDEADYYCQSYDSSG
>V29RF-AQIA01007590.1-iglv |(59340, 59647)|1.82171665584|(0.956,0.587,0.796)|1
SWAQSVLTQPPSVSAAPGQRVTISCSGSSFNFRRYYVSWYQQLPGAAPKLLIYDVSKRPS
GVLDRFSGSQSGTSTTLGITGLQSEDEADYYCSAWDSSLS
>V30RF-AQIA01007599.1-igkv |(24865, 25175)|1.85038959793|(0.613,0.674,0.582)|1
SLSQPVLTQSPSASASLGASVKLTCTLSSGHSSYAIAWHQQQQGKAPRYLMRLNSDGSHS
KGDGIPDRFSGSSSGAERYLTISNLQSEDEADYYCQTWDTG
>V31RF-AQIA01007600.1-iglv |(7012, 7324)|2.9969280013|(0.997,1.000,1.000)|1
SWAEVVFTQPHSVSGSPGQTVTISCTRSSGSIDSKYVQWYQQRPGSAPTTVIYKDNQRPS
GVPDRFSGSIDSSSNSASLAISGLKSEDEADYYCQSADGSYN
>V32RF-AQIA01007601.1-iglv |(95905, 96206)|2.02104929642|(0.858,0.556,0.938)|1
VQAGLTQPPSVSKGLRQTATLTCTGNSNNVGNQGAAWLQQHQGHPPKLLSYRNNNRPSGI
SERFSASRSGNTASLTITGLQPEDEADYYCSAWDSSLS
>V33RF-AQIA01007605.1-iglv |(38320, 38626)|2.99899600001|(1.000,1.000,0.999)|1
DSETVVTQEPSLSVSPGGTVTLTCGLSSGSVSTSNYPSWYQQTPGQAPRTLIYSTNTRPS
GVPDRFSGSILGNKAALTITGAQADDESDYYCTLYMGSGI
>V34RF-AQIA01007915.1-ighv |(45465, 45774)|2.86758501962|(0.985,0.997,0.909)|1
VQCEVQLVEPGGGLVQPGGSMRLSCAASGFTFSSYGMSWVHQTPGKGLEWVSTISGNGVS
TWYPDAVKGQFTISRNNTKNSLYLQMNSLSVEDIAVYYCAK
>V35RF-AQIA01009600.1-iglv |(7837, 8140)|2.99899600001|(1.000,1.000,0.999)|1
SWAQSAPTQPPSVSGSPGQSVTISCTGTSSDVGGYNYVSWYQQHPGKAPKLMIYGVSKRP
SGVSDRFSGSKSGNTASLTISGLQAEDEADYYCCSYTTS
>V36RF-AQIA01009600.1-iglv |(20648, 20951)|2.99799200002|(1.000,0.999,0.999)|1
SAASYDLTQPPSVSVSPGQTARITCGGDNIGSEVVNWYQQKPPQAPVLVIYADSERPSGI
PERFSGSNSGNTATLTISGVEAGDEADYYCQVWDISSDH
>V37RF-AQIA01009608.1-iglv |(4448, 4751)|2.991900005|(0.999,0.994,0.999)|1
SWAQSALTQPPSVSKSLGQSVTISCTGTSSDIGGYNGVSWYQQHSGTAPRLLIYEVSKRP
SGVSDRFSGSKSGNTASLTISGLQAEDEADYYCCSYRSG
>V38RF-AQIA01017094.1-igkv |(176237, 176552)|2.99496000066|(0.999,1.000,0.996)|1
SSGDIVMTQTPLSLSVTPGEPASISCRSSQSLLHSNGYTYLHWYLQKPGQSPQLLIYLVS
NRPSGVPDRFSGSGSGTDFTLKISRVEAEDVGVYYCEQTLQTP
>V39RF-AQIA01017096.1-igkv |(35522, 35822)|2.99899200002|(0.999,1.000,1.000)|1
ARCDIQMTQSPSSLSASVGDRVTVTCRASQGINKELSWYQQKPGKAPTLLIYAASSLQTG
VSSRFSGSGSGTDYTLTISSLQPEDVATYYCLQDYNTP
>V40RF-AQIA01017096.1-igkv |(53919, 54234)|2.7342975214|(0.883,0.999,0.907)|1
SSGDIVMTQTPLSLPVTPGEPASISCRSSQSLLHSNGYTYLYWYLQKPGQSPQLLMYFAS
YRASGVPDRFSGSGSGTDFTLEISRVEAEDIGVYNCMQGTQLP
>V41RF-AQIA01017097.1-igkv |(8073, 8388)|2.99082001102|(1.000,0.997,0.994)|1
SSGDIVMTQTPLSLPVTPGEPASISCRSSQSLLDSDGYTCLDWYLQKPGQSPQLLIYEVS
NRVSGVPDRFSGSGSGTDFTLKISRVEAEDVGVYYCMQSIEFP
>V42RF-AQIA01017097.1-igkv |(30350, 30668)|1.788308737|(0.828,0.787,0.511)|1
SSGDIVMTQTPLSLLVTPGEPASVSSCRCSQSLPYRGEKTYLYWYLQKPGQSPQLLIYFV
SNRASRVPDRFRGSGSDTDFTLKISWVETEDVGIYYRMQNIELP
>V43RF-AQIA01017097.1-igkv |(38546, 38864)|2.95609598554|(0.998,1.000,0.963)|1
SSGDIVMTQTPLSLPVTPGEPASISCRSSQSLLDSEDGNTYLDWYLQKPGQSPQPLIYEV
SNRASGVPDRFSGSGSDTDFTLKISRVEAEDVGVYYCMQYTHIP
>V44RF-AQIA01017097.1-igkv |(56327, 56642)|2.05433354369|(0.745,0.605,0.984)|1
TSGDILLTQTPLSLPVTPGEPASISCRSSQSLLHSNGNTYLHCYLQKPGQSPQLLIYEVS
NRASGVPDRFSGSGSDTDFTLKINLVEAEDVGVYSCMQTTQWP
>V45RF-AQIA01017097.1-igkv |(61240, 61555)|2.96115712206|(0.978,0.997,0.988)|1
SSGDIVMTQTPLSLPVTLGEPASISCRSSQSLVYSDGKTYLYWYLQKPGQSPQLLMYLVS
KRASGVPDKFSGSGSGTDFTLKISRVEAEDVGVYYCMQALRSP
>V46RF-AQIA01017097.1-igkv |(64674, 64989)|2.75723009791|(0.928,0.976,0.874)|1
SSGDIVMTQTPLSLPVIPGEPASISCRSSQSLLHSDGYTYLHWYLQKPGQSPQLLIYLGS
NCASGVPDRFSGSGSGTDFTLKISRVEAEDIGIYYRMQNLQIP
>V47RF-AQIA01017097.1-igkv |(69341, 69641)|3.0|(1.000,1.000,1.000)|1
ARCDIQMTQSPSSLSASVGDTVTITCRASQGINNELAWYQQKPGKAPTLLLYSGSSLHTG
VPSQFSGSGSGTDFTLTISSLQPEDVATYYCRQDYNTP
>V48RF-AQIA01017097.1-igkv |(77437, 77752)|2.97309640489|(0.996,0.981,0.997)|1
SSGDIVMTQTPLSLPVTPGEPASISCRSSQSLLDSDGYTHLHWYLQKPGQSPQLLMYLVS
NRASGVPDRFSGSGSGTDFTLKISRVEAEDVGVYYCMQTLQTP
>V49RF-AQIA01017099.1-igkv |(11233, 11548)|2.96845704707|(0.998,0.993,0.979)|1
TSGDIVMTQTPLSLPVTPGEPASISCRSSQSLLHSNGYTYLFWYLQKPGQSPQLLIYLVS
NRASGVPDRFSGSGSGTDFTLKISRVEAEDVGVYYCLQDIQLP
>V50RF-AQIA01017099.1-igkv |(19461, 19761)|2.99798400013|(1.000,1.000,0.998)|1
ARCDIQMTQSPSALSASVGDRVTISCRASQNIYSGLAWYQQKPGKAPKLLIYAASRLQSG
IPSRFSGSGSGTDFTLTISSLQPEDSAAYYCQQVYSNP
>V51RF-AQIA01017100.1-igkv |(7491, 7806)|2.99798400013|(1.000,1.000,0.998)|1
TSGDIVMTQTPLSLPVTPGEPASISCRSSQSLLHSDGYTYLDWYLQKPGQSPQLLIYLGS
KRASGVPDRFSGSGSGTDFTLKISRVEAEDVGVYYCMQGTQLP
>V52RF-AQIA01017105.1-igkv |(1136, 1436)|3.0|(1.000,1.000,1.000)|1
ARCDIQMTQSPSSLSASVGDTVTITCRASQGISNDLAWYQQKPGETPKLLIYEASSLQSG
IPSRFSGSGSGTDFTLTISSLQSEDFATYYCQHYYSTP
>V53RF-AQIA01017109.1-igkv |(27445, 27743)|2.86078943915|(1.000,1.000,0.900)|1
ARCDIQMTQSPSSLSASVGDRVTITCQASQGISNNLAWYQQKPGKVPKLLIYKASTLQSG
VPSRFSGSGSGTDFTLTISSLQPEDFATYYCQHGYGI
>V54RF-AQIA01017115.1-igkv |(12703, 13003)|2.99280401921|(1.000,0.993,1.000)|1
ARCDIQMTQSPSSLSASVGDRVTITCRASENVNNYLHWYQQKPGKAPKLLIYAASTLQSG
VPSRFSGSGSGTDYTLTISSLQSEDVATYYCQHSYGTP
>V55RF-AQIA01017115.1-igkv |(28053, 28368)|2.95715937872|(0.997,0.998,0.966)|1
SSGDIVMTQTPLSLPVTPGEPASISCRSSQSLLHSDGNTYLYWYLQKPGQPPRLLIYRVS
NRFSGVPDRFSGSGSGTDFTLKISRVKAEDVGVYYCMQALQTP
>V56RF-AQIA01017115.1-igkv |(33048, 33363)|2.97103640693|(0.997,0.982,0.993)|1
SSGDIVMTQTPLSLPITPGEPASISCRSSQSLLHSNGNTYFHWYLQKPGQSPQLLIYGGS
NRASGVPDRFSGSGSGTDFTLKISKVEAEDVGVYYCVQAIAFP
>V57RF-AQIA01017115.1-igkv |(51966, 52281)|2.99494800078|(1.000,0.997,0.998)|1
SSGDIVMTQTPLSLPVTPGEPASISCRSSQSLLHSNGNTYLYWYLQKPGQPPRLLIYRVS
NRFSGVPDRFSGSGSGTDFTLKISRVEAEDVGVYYCMQALQTP
>V58RF-AQIA01017115.1-igkv |(73836, 74136)|2.99899600001|(1.000,1.000,0.999)|1
ARCDIQMTQSPSSLSASVGDRVTITCRASQGISNWLAWYQQKPGKAPKLLIYRASNLETG
VPSRFSGSGSGTDFTLTISSLQPEDIATYYCQQHDNSP
>V59RF-AQIA01017115.1-igkv |(81810, 82124)|2.9468704721|(0.996,1.000,0.957)|1
SSGDIVMTQTPLSLPVTPGEPASISCRSSQSLLHSNGNTYLHWYLQKPGQSPRLLIYKVT
NRESGVPDRFSGSGSGTDFTLKISRVEPEDVGVYYCMQSTKDP
>V60RF-AQIA01017139.1-igkv |(30471, 30771)|2.99899200002|(0.999,1.000,1.000)|1
TTGQVILTQSPATLSLSPGERATLSCRASQSVSSYLAWYQQKPGQAPRLLIHSASSRATG
IPDRFSGSGSGTEFTLTISSLEPEDVGVYHCYQYYSGY
>V61RF-AQIA01017139.1-igkv |(39707, 39995)|2.38558983335|(0.763,0.801,0.887)|1
TILTQSAAFVSATPGDKVTISCKASQDIDDDMNWYQQEPGEAPKLIIKDATTLVSGIPPR
FSGSGYGTDFTLTINNVESEDAAYYFCLQHDNFP
>V62RF-AQIA01017140.1-igkv |(859, 1159)|2.99899600001|(1.000,1.000,0.999)|1
AKCDIQMTQSPTFLSASVGDRVTIACRASQSINKGLAWYQQKPGKAPKLLISYASNLYTD
VPSRFSGSGSGTDFTLTISSLQPEDAATYYCFQYNSYP
>V63RF-AQIA01017142.1-igkv |(9949, 10237)|1.81434113432|(0.628,0.535,0.812)|1
TILTQSPAFVSATPGDKVTISCRAGQDIDDDMNWYQQEPGEAPKLIIKDATTLVSGIPPQ
FSGSGYGIDFTLTINSMKSEDTAYYFCQQRDNTP
>V64RF-AQIA01017150.1-igkv |(11178, 11496)|2.99899600001|(1.000,1.000,0.999)|1
ACGDIVMTQSPDSLAVSLGERVTINCKSSQSLLYSSNNKNYLAWYQQKPGQAPKLLIYWA
STRESGVPNRFSGSGSGTDFTLTISGLQAEDVAVYYCQQYYSTP
>V65RF-AQIA01046502.1-trgv |(39505, 39815)|1.50520060613|(0.921,0.570,0.653)|1
SQKSSNLEGKTKSITGPTGSPAEITCDLPGVSTLYIHWYLHQEGKAPQRLLYYEPYYFTV
VLESGISPGKYDTASTRKSWNLRLQNLIENDSGVYYCATWD
>V66RF-AQIA01046502.1-trgv |(44235, 44548)|2.98742416586|(1.000,1.000,0.988)|1
SQKSSNLEGRTKSVTRPTGSSAEITCDLPEVSSFYIHWYLHQEGKAPQRLLYYDSSNSRV
VLESGISPGKYDTYGSTRSNLRLILRNLIENDSGVYYCANWD
>V67RF-AQIA01046502.1-trgv |(48629, 48942)|2.96640647223|(1.000,1.000,0.970)|1
GQKSSNLEGITKSVTRPTGSSAEITCDFSGDSNFYIHWYLHQEGKVPQRLLYYDVSNSRD
VLESGLSPGKYYTHTRTRWSWILILRNLIENDSGVYYCANWD
>V68RF-AQIA01046502.1-trgv |(58146, 58459)|2.93059696049|(0.998,0.982,0.958)|1
SQKSSNLEGRTKSVTRPTGSSAEITCDLPEVSSFYIHWYLHQVGKAPQRLLYYDTSNSRV
VLESGISPGKYDSYGSTRNNLRLRLRNLIENDSGVYYCANWD
>V69RF-AQIA01048525.1-trbv |(36418, 36709)|2.3825646145|(0.849,0.773,0.795)|1
PEVTQTPSHQVTQMGQEVILRCVPIPNHLNFYWYRQILGQKVEFLVIFFDNNISEKSEIF
EDRFSVGRPDGSNFTLKIKSTKLEDSAMYFCASSE
>V70RF-AQIA01048525.1-trbv |(43379, 43692)|2.74461016549|(0.996,0.995,0.843)|1
SLDTAVSQTPKYLVTQTGKNEYLKCEQNLGHDTMYWYKQDSKKLLKIMFSYNNKQLIINE
TVPNRISPDSPDKAHLNLHIKSLELGDSAVYFCASSQGTALQ
>V71RF-AQIA01048525.1-trbv |(48020, 48317)|2.99899600001|(1.000,1.000,0.999)|1
PIDSGVTQTPKHLVMGMTNKKSLKCEQHMGHRAVYWYKQKVKKPPEIMFMYNYEKLSINE
SVPSRFSPECSQSSLFYLHLRALQPEDSALYLCASSQ
>V72RF-AQIA01048525.1-trbv |(56235, 56535)|2.80419749294|(0.967,0.991,0.879)|1
HTEPEVTQTPSHQVTQMGQEVILRCVPISNHFYFYWYRQILGQKVEFLVSFYNGKISEQS
EIFEDQFSVGRSDGVHFTLKIKSTKLEDSAMYFCASSE
>V73RF-AQIA01048525.1-trbv |(63840, 64138)|2.52634357005|(0.976,0.953,0.764)|1
VSQTPKYLVTQTGKEESLKCEQNLGHDTMYWYKQDSKKLLKIMFSYNNKKLFINETVSNR
FSPDSPDKARLILHIKPLELGDSAVYFCASSQGTALQ
>V74RF-AQIA01048525.1-trbv |(72343, 72634)|2.54970234084|(0.934,0.908,0.790)|1
PEVTQTPSHQVTRMGQEVILRCVPIPNHLYFYWYRQILGQKVEFLVYFYNGEISEKSEIF
EDRFSVGRSDGVHFTLKIKSTKLEDSATYFCASSE
>V75RF-AQIA01048525.1-trbv |(78854, 79151)|3.0|(1.000,1.000,1.000)|1
PLDTAVFQTPKYLVTQMGKKESLKCEQNLGHDTMYWYKQDSKKLLKIMFIYSNKEPILNE
TVPNRFSPESLDKAHLNLHIKSVELGDSAVYFCASSQ
>V76RF-AQIA01048525.1-trbv |(83218, 83515)|2.98880001921|(0.999,0.992,0.998)|1
PTDTGVTQTPKHLVMEMTNKKSLKCEQHMGHNAMYWYKQKAKKPPELMFVYQYEKLSINE
SVPSRFSPECSKSSLLYLHLRALQPEDSALYLCASSQ
>V77RF-AQIA01048525.1-trbv |(94178, 94474)|2.87374611268|(0.995,0.960,0.937)|1
PVEAGVTQTPRSLIKMRGQQATLSCSPISGHRSVYWYQQTPGQGLQFLFEYFSETQRQKG
NFSNRFSGRQFSNSRSEMNVSTLELGDSALYLCASSL
>V78RF-AQIA01048526.1-trbv |(5857, 6154)|3.0|(1.000,1.000,1.000)|1
PANADVTQSPKFQILKTGQSMTLQCAQDMNHNSMYWYRQDPGMGLRLIHYSATEDTTDPG
EVPDGYSVSRLNKKEFLLRLESAALSQTSVYFCASSE
>V79RF-AQIA01048526.1-trbv |(20529, 20842)|2.938150505|(0.988,0.996,0.958)|1
SLDTAVSQTPKYLVRQTGKNESLKCEQNLGHNAMYWYKQDSKKLLKIMFIYNNKEPILNE
TVPYRFSPKSPDKAHLNLHIKSLELGDSAVYFCASSQDTALQ
>V80RF-AQIA01048526.1-trbv |(23960, 24257)|2.97322155506|(0.998,1.000,0.977)|1
PMETGVTQTPRHLVMGMTNKKSLKCEQHLGHNAMYWYKQKAKKPPELMFIYNFKERAENN
SVPSRFSPECPDSSHLHLHLRALQPEDSALYLCASSQ
>V81RF-AQIA01048526.1-trbv |(35703, 36000)|2.99899600001|(1.000,1.000,0.999)|1
PVNAGVTQTPKFQVLKTGQNMTLKCAQDMNHDRMYWYRQDPGMGLRLIHYSAGEGSTEKG
EVPNGYNASRLNKKDFLLRLESAAPSQTSMYFCASSE
>V82RF-AQIA01048527.1-trbv |(3129, 3429)|2.99899600001|(1.000,0.999,1.000)|1
HTGAGVSQSPRNKVTEEGKDVVLRCDPISGHTALYWYRQSLGKGLEFLIYFQGNDAPDKS
GLPSGRFSAERTEGSVSTLKIQRTEQGDSAVYLCASSL
>V83RF-AQIA01048527.1-trbv |(25700, 26000)|2.99085601037|(0.999,0.999,0.993)|1
HTGAGVSQSPSNKVTEKGKDVELRCDPISGHAVLYWYRQNLGQGLEFLIYFQGTGAVDDS
GLRSDRVSATRPEGSVSTLKIQHTEQGDSAMYFCASSL
>V84RF-AQIA01048528.1-trbv |(4386, 4682)|2.98559608|(0.999,0.989,0.998)|1
SVDTGVTQSPTHLIKTRGQQVTLRCSPISGHNTVSWYQQAPGQGPQFIFEYANELRTSEG
NFPHRFSGRQFRDYHSEMNVSALELGDSALYLCASSL
>V85RF-AQIA01048528.1-trbv |(7069, 7365)|2.991900005|(0.999,0.999,0.994)|1
SVDCGVTQTPKHLITAIGQQVTLRCSPRSGDRSVYWYQQSLGQGLQFLIQYYNGEERAKG
NILERFSAQQFADLHSELNLSSLELGDSALYFCASSE
>V86RF-AQIA01048529.1-trbv |(2063, 2360)|2.27954862991|(0.925,0.656,0.953)|1
HRDAEITQSPRHKITETGRKVTLTCHQTWNHNNMFWYRQDLGHGLRLIHYSYGVPDTNKG
EVPDGYSVSRSNKEDFPLTLESAASSQTSVYFCASSE
>V87RF-AQIA01048530.1-trbv |(6133, 6424)|2.50928549499|(0.942,0.950,0.752)|1
AGVAQSPRYKITGKSQTVTFWCDPISGHATLYWYRQILGQGPELLVQFQNKGVVDDSQLP
KDRFSAERLKGVDSTLKIQPAELGDSAVYLCASSL
>V88RF-AQIA01048530.1-trbv |(18692, 18989)|2.06727632267|(0.787,0.584,0.955)|1
HRDAGITQSPRYKVTETGRQVTLTCHQTWSHSYMFWYRQDLGHGLRLIHYSAGAGITDKG
EVPDGYVVSRSKTEDFLLTLESATRSQTSVRFCASSE
>V89RF-AQIA01048530.1-trbv |(27859, 28150)|2.46089085084|(0.947,0.926,0.743)|1
AGVAQSPRYKVIEKSQAVTFWCNPISGHATLYWYRQILGQGPELLVQFRNNDVVDDSQLP
KDRFSAERLKGVNSTLKIQPAELGDSAVYLCASSL
>V90RF-AQIA01048530.1-trbv |(44934, 45231)|2.99798400013|(1.000,1.000,0.998)|1
PVNAGVTQTPKFQVLKTGQSMTLQCAQDMNHDYMYWYRQDPGMGLRLIHYSVGEGSTEKG
EVPDGYNVTRSNTEDFPLRLESAAPSQTSVYFCASSD
>V91RF-AQIA01048530.1-trbv |(49166, 49466)|2.994900005|(1.000,0.995,1.000)|1
HTGAGVSQSPRYKVTKRGQDVALRCDPISGHDYLYWYQQALGQGPAFLTYFQDDAQRDKS
GLPNDRFSAERTEGSVSTLKIQRTEQGDSAVYLCASSL
>V92RF-AQIA01048530.1-trbv |(57090, 57380)|2.86327015267|(0.985,0.989,0.911)|1
QAGVTQSPTHLIKTRGQQVTLRCSPISGHTNVYWYQQALGQGPQFILWYDEEEERDRGTF
PHRFSGHQFPNYSSELNVNALEVEDSALYLCASSL
>V93RF-AQIA01048530.1-trbv |(68536, 68827)|2.97609640489|(0.997,0.982,0.998)|1
AGVSQSPRYKVTKRGQDVALRCDPISGHVALYWYRRTLGQGPELLTYFQNDAQPDKSGLP
SDRFSAERTEGSVSTLKIQRTEQGDSAVYLCASSL
>V94RF-AQIA01048530.1-trbv |(82295, 82592)|3.0|(1.000,1.000,1.000)|1
LVNVGVTQTPKFQVLKTGQSMTVQCAQDMNHNFMYWYRQDPGMGLRLIHYSGAAGTTDKG
EVPSGYNVSRLNTEDFPLRLESADPSQTSVYICASSY
>V95RF-AQIA01048530.1-trbv |(86912, 87212)|2.994900005|(1.000,0.995,1.000)|1
HTVARVSQSPRYKVTKRGQDVALRCDPISGHATLYWYQQALGQGPELLTYFSYEAQQDKS
GLPSDRFSAERPEGSVSTLKIQRTQQGDSAVYLCASSL
>V96RF-AQIA01048530.1-trbv |(109105, 109405)|2.99798400013|(1.000,0.998,1.000)|1
HTGAGVSQSPRYKVTERGQDVALRCDPISGHDYLYWYQQALGQGPELLTYFNYKAQPDKS
GLPNDRFSAERPEGSVSTLKIQRTEQRDSAVYLCASSL
>V97RF-AQIA01048530.1-trbv |(114175, 114471)|2.99696400065|(1.000,1.000,0.997)|1
PVDAGVTQSPTHLIKTRGQQVTLRCSPISGHTSVSWYQQALGQGPQLIFEYDRKEERVRG
NFPDRFSGRQFPNYSSELNVNASEMGDSALYLCASSL
>V98RF-AQIA01048530.1-trbv |(120217, 120514)|2.96989600501|(0.988,0.989,0.993)|1
PGNAGVNQTPKFQVLKTGQSMTLQCAQDMNHECMSWYRQDPGMGLRLIHYSVGAGITDKG
EVPNGYNVSRSNTEDFPLRLESAASSQTSVYFCGSSD
>V99RF-AQIA01048531.1-trbv |(13036, 13336)|2.99798400013|(1.000,0.998,1.000)|1
HTGAGVSQFPRYRVTKRGQDVTLRCDPISGHEYLYWYQQAPGQGPEFLTYFQNDAQPDKS
GLPNDRFSAERTEGSVSTLKIQRTEQGDSAVYLCASSL
>V100RF-AQIA01048531.1-trbv |(21500, 21796)|2.95954165691|(0.999,0.994,0.970)|1
PVDTGVTQSPTHLIKTRGQQVTLRCSPISGHSSVSWYQQALGQGPQFIFEYYEKEERERG
NFPGRFSGHQFPNYSSELNVSALLLGDSALYLCASSL
>V101RF-AQIA01048532.1-trbv |(3516, 3812)|2.99899600001|(1.000,1.000,0.999)|1
PVDAGVTQSPTHLIKTRGQQVTLRCSPISGHTSVYWYQQALGQGPQFIFQYYEKEERERG
NFPDRFSGHQFPNYSSELNVSALLLGDSALYLCASSL
>V102RF-AQIA01048532.1-trbv |(10804, 11101)|2.99179201242|(0.994,1.000,0.998)|1
PVNAGVTQTPKFQVLKTGQSMIVQCAQDMKHDYMFWYRQDPGMGLRLIYYSVTAGITTKG
EVPNGYNVSRKNTEDFLLRLESADPSQTSVYICASSE
>V103RF-AQIA01048532.1-trbv |(15109, 15409)|3.0|(1.000,1.000,1.000)|1
HTGAGVSQSPRYKVIKKGQDVALRCDPISGHAALYWYQQALGQGPEFLTYFNYKAQPDKS
GLPNDRFSAERPEGSVSTLTIQRTEQQDSAVYLCASSL
>V104RF-AQIA01048532.1-trbv |(23918, 24214)|1.96226218333|(0.967,0.988,0.535)|1
PVDAGVVQSPTHLIKTRGQQVTLRCSPISGHNTVYWYQQALGQGPQLIFQYYRGEDRGRG
NFPDRFSGHQFPNYSSELNVNASEMGDSALYLCASSL
>V105RF-AQIA01048532.1-trbv |(34644, 34944)|2.99174403277|(1.000,0.992,1.000)|1
HADAGVSQDPRHKITKTGQNVSFKCVPISEHNRLYWYRQTLGQGPEFLTYFQNEAQQDRS
GLFSDRFSAERPEGSISTLMIQHTEQGDSAVYLCASSL
>V106RF-AQIA01048532.1-trbv |(48704, 49001)|2.99798400013|(1.000,1.000,0.998)|1
HMDAGITQSPRHKITETGTPVTLRCHQTENHRYMYWYRQDLGNGLRLIHYSYGVEDTDKV
EVSDGYSVSRSKTEDFLLTLESAPRSQTSVYFCASSE
>V107RF-AQIA01048532.1-trbv |(59756, 60044)|2.03130659096|(0.956,0.659,0.803)|1
GVTQSPRYKITEKKQPVAFWCNPISGHNTLYWYRQNLGQGPELLVQYENEEAVDDSQLPK
DRFSAERLKGIDSTLRIQPAELGDSAVYLCASSL
>V108RF-AQIA01048532.1-trbv |(65345, 65645)|2.98385201038|(0.997,0.991,0.996)|1
HTDAGVIQSPRHEVTEMGKEVTLRCEPISGHSSLFWYRQTMMRGLEFLIYFNNKSPIDDS
GMPKDRFSATMPDASFSTLKIQPSEPRDSAVYFCASSL
>V109RF-AQIA01048532.1-trbv |(68613, 68913)|2.97367205249|(0.994,0.985,0.995)|1
HTDAGVIQSPRHEVTEMGKEVTLRCEPISGHTYLFWYRQTMMRGLEFLIYFNNKSPIDDS
GMPKDRFSAKMPDASFSTLKIQPSEPRDSAVYFCASSL
>V110RF-AQIA01048532.1-trbv |(83967, 84267)|2.99196000066|(0.996,0.999,0.997)|1
LIDAGVTQTPRHKVTEMGQEVTMRCQPILGHNTVFWYRQTVMQGLELLVYLRNKASLDDS
GMPKDRFSAEMPDASLATLKIQPSEPRDSAVYLCASGL
>V111RF-AQIA01048532.1-trbv |(91012, 91313)|2.41425002152|(0.956,0.913,0.733)|1
AGVTQFPSHRVIEKGQAVTLRCDPISGHDYLYWYRRVMGKEIKFLIYFLRAYTQDESGMP
NKRFSAERTGGTYSTLKVQPAELEDSGVYFCASSQDTV
>V112RF-AQIA01048533.1-trbv |(4086, 4383)|1.60406023798|(0.918,0.571,0.688)|1
HGDVMVIQNPRYQVTQLEKPVTLSCSQNLNHQVMYWYQQKPSQAPKLLFHYYDKDFNNEA
DTPDNFQSRRPNTSFCFLDIRSPGLEDAAVYLCASSK
>V113RF-AQIA01048536.1-trbv |(12317, 12610)|2.12445651222|(0.829,0.894,0.603)|1
LSNAGITQNPRHLVRRRGQEARLRCSPMKGHSHVYWYRQLPEEGLKFMVYLQKEKIIDES
GMPKEWFSAEFPKEGPSILRIQQAEQEDSAAYFCAS
>V114RF-AQIA01048536.1-trbv |(15427, 15724)|2.99698000014|(1.000,0.998,0.999)|1
TMDGRITQSPKYLFRKEGQNVTLSCEQNLNHDAMYWYRQDPGQGLRLIYYSQIVNDIQKG
DIAEGYSVSRERKESFPLTVTSAQRNPTAFYLCASSI
>V115RF-AQIA01048536.1-trbv |(33459, 33759)|2.83038780652|(0.993,0.989,0.890)|1
STDTKVTQRPRLLVKANKQKAKMDCVPVKGHSYVYWYRKKLDEELKFLVYFQNEEIIQKA
EIINKRFSAQCPQNSSCTLEIQSTESGDAALYFCASSK
>V116RF-AQIA01048536.1-trbv |(42435, 42735)|2.90131017975|(0.994,0.985,0.936)|1
SFHAEVTQTPGYLVKGKGQKTKMDCTPEKGHTYVYWYQQNQNKEFTFLISFQNEQVLQET
ELHKKRFSSQCPKNLPCSLEIPSSEPGDTALYLCASSQ
>V117RF-AQIA01048536.1-trbv |(54577, 54875)|2.92758593645|(0.995,0.999,0.944)|1
SMDADVTQTPRNKIAKTGKRIMLECSQTKGHDQMYWYRQDPGLGLRLIYYSFDVQDINKG
EISNGYSVSRQEQAKFSLSLESATPNQTALYFCATSD
>V118RF-AQIA01048536.1-trbv |(62410, 62707)|2.99398000014|(0.997,0.998,0.999)|1
LTEADIYQNPRHRVIGTGKKITLECSQTVGHDKMYWYQQDPGMELHLIHYSYGVNSTERG
DFSSESTVSRLRIEHFPLTLESASPSHTSQYLCASSE
>V119RF-AQIA01048536.1-trbv |(103279, 103576)|2.90275467319|(0.982,1.000,0.932)|1
PLEAQVTQNPRYLITVTGKKLTVTCSQNMNHEYMSWYRQDPGLGLRQIYYSVNVEMVDKG
DIPEGYNVSRKEKRNFPLILESPSPSQTSLYLCASSL
>V120RF-AQIA01048536.1-trbv |(108616, 108923)|2.99799600001|(0.999,1.000,0.999)|1
LVDVKVTQSSRYLIKRTGEKVFLECVQDMDHERMFWYRQDPGLGLRLIYFSYDVKLNEKG
DIPEGYSVSREKKERFSLILGSASTNQTSMYLCASSLSTA
>V121RF-AQIA01048536.1-trbv |(128401, 128704)|3.0|(1.000,1.000,1.000)|1
SVFSAVVSQKPSRDVCQRGTSVTIQCQVDSQVTMMFWYRQQPGQSMTLIATANQGSEATY
ESGFVIDKFPISRPNLTFSTLTVSNTSPEDSSIYLCSVE
>V122RF-AQIA01058132.1-igkv |(2776, 3091)|2.98758408012|(1.000,0.998,0.990)|1
TSGDIVMTQTPLSLPVTPGEPASISCRSSQSLLHSGGKTYLYWYLQKPGQSPQLLIHEVS
NRASGVPDRFSGSGSGTDFTLKISRVEAEDVGVYYCMQGIQLP
>V123RF-AQIA01058133.1-igkv |(2029, 2329)|3.0|(1.000,1.000,1.000)|1
ARCDIQMTQSPSSLSASVGDTVTITCRASQGISNDLAWYQQKPGETPKLLIYEASSLQSG
IPSRFSGSGSGTDFTLTISSLQSEDFATYYCQHYYSTP
>V124RF-AQIA01064136.1-trav |(11390, 11693)|2.12478691609|(0.789,0.695,0.704)|1
MCLILVTTGQNIDQPTEMTAMEGVIVQINCTYQTSGFNGLSWYQQHDGEAPTLLSYNVLD
GLEEKGRFSSFLSNSKRYSYLLLKELQMKDSASYLCAVR
>V125RF-AQIA01064137.1-trav |(6322, 6619)|2.85951574615|(0.965,0.911,1.000)|1
GLRAQLVTQPEDQVTVAEGNPLTVKCTYSVSGNPYLFWYVQCPNQGLQFLLKYITGDNLV
KGSYGFEAEFNKSQTSFHLKKPSALVSDSALYFCAVR
>V126RF-AQIA01064137.1-trav |(37156, 37446)|2.99289600501|(0.999,1.000,0.994)|1
MSRGEDVEQSLFLSVREGDISVINCTYTDSSSTYLYWYKQEPGAGLQLLTYILSNTDLKQ
DQRLTVLLNKKDKHLSLCIADTQTEDSAIYFCAES
>V127RF-AQIA01064137.1-trav |(47073, 47361)|2.06557688782|(0.967,0.942,0.591)|1
VKSQKIEQNSEALNIQEGKTATLTCNYTNYSPSYLQWYRQDPGRGPVFLLLIRENEKEKW
KERLKVTFDTTLKQSLFHITASQPADSATYLCAL
>V128RF-AQIA01064138.1-trav |(6177, 6471)|2.99899600001|(1.000,0.999,1.000)|1
GINGDSVVQTEGQVLLSEGDSLIVNCSYESTQYPSLFWYVQYPGEGLQLLLKAMKFNDKE
SNKGFEATYRKETTSFHLEKDSVQESDSAVYFCALS
>V129RF-AQIA01064138.1-trav |(19410, 19703)|3.0|(1.000,1.000,1.000)|1
GSGKNQVEQSPQSLIILEGKNCTLQCNYTVSPFSNLRWYKQDTGKGPISLTIMTFSENTK
SNGRYTATLDADTKQSSLHITAAQLSDSASYICVVS
>V130RF-AQIA01064144.1-trav |(2574, 2880)|3.0|(1.000,1.000,1.000)|1
VWSQQKEVEQDPGPFSVPEGATVTFNCTYSNSASQSFFWYRQDSRKEPKLLMSVYSSGNE
DGRFTAQLNRASQYISLLIRDSQLSDSATYLCAVRTQCSP
>V131RF-AQIA01064144.1-trav |(8015, 8312)|2.99067605248|(1.000,0.991,1.000)|1
GTRAQSVTQLDSQVSVSEGVPVLLRCNYSSSFSPYLFWYVQYPNQGLQLLLKYTSGTTLV
KGINGFEAEFKKSETSFHLTKASAHVSDAAEYFCAVN
>V132RF-AQIA01064146.1-trav |(4210, 4500)|2.99899600001|(1.000,1.000,0.999)|1
VNGENVEQHPSTLSVQEGDSSVIKCTYSDSASNYFPWYKQELGKGPQFIIDIRSNAHEKK
NQRITVLLNKTAKHFSLHITETQPGDSAVYFCAAS
>V133RF-AQIA01064146.1-trav |(26731, 27019)|2.99899600001|(1.000,0.999,1.000)|1
VWSQQKVEQNSGPLNVPEGAIASLNCTYSDSGSQSFFWYRQYSGQSPELLMSTYSSGDKE
DGRFTAQLDRASQYVSLLIRDSQLSDSATYLCAV
>V134RF-AQIA01064146.1-trav |(33220, 33517)|2.96458198995|(1.000,0.989,0.978)|1
GTRAQSVTQLDSQVSVSEGVPVLLRCNYSSSFSPNLFWYVQYPNQGLQLLLKYISGTTLV
KGINGFEAEFKKSETSFHLTKASAHVSDAAEYFCAVS
>V135RF-AQIA01064146.1-trav |(38786, 39083)|2.99593600205|(1.000,1.000,0.996)|1
TARAQSVTQPDIHITVSEGASLELRCNYSYGATPSLFWYVQSPGQGLQLLLKYFSGDTVV
QGIKGFEAEFKRSQYSFNLRKPSVHWSDAAEYFCAAG
>V136RF-AQIA01064146.1-trav |(52629, 52922)|2.98096052424|(1.000,0.998,0.984)|1
VSRGESVGLHLPTVTVQEGDNSVINCTYSDSASDYFLWYKQESGKGPQSIMDIRSNMAKR
QGQRLTVLLNKTMKHLSLQIAATEPGDSAVYFCAEN
>V137RF-AQIA01064146.1-trav |(58513, 58814)|2.94828590752|(1.000,1.000,0.956)|1
SGIAQKITQTQPAMFVQEKEAVTLDCTYDTSDQNYGLFWYKQPSSGEMIFLILQMSYDKQ
NATEGRYSLNFQKARKSVNLVISASQVGDSATYFCAMR
>V138RF-AQIA01064146.1-trav |(76833, 77127)|2.99899200002|(0.999,1.000,1.000)|1
RTRGDSVTQMEGPVTLSERAFLTINCTYTATGYPSLFWYVQYPGEGPQLLLKAAKTDEKG
SNKGFEATYRKETTSFHLKKDSVQESDSAVYFCALS
>V139RF-AQIA01064146.1-trav |(101455, 101748)|3.0|(1.000,1.000,1.000)|1
VWSQQKEVEQNPGPLSVPEGATASLNCTYSNSAFQYFMWYRQYSRKGPQLLIYIYSSGNK
EDGRFTAQVDKSSKYISLFIRDSQPSDSATYFCAMS
>V140RF-AQIA01064148.1-trav |(10272, 10559)|3.0|(1.000,1.000,1.000)|1
VNSQQGEEDPQALSIQEGENATMNCSYKTSINNLQWYRQDSGRSLVQLVLIRSNEREKNS
GRLRVTLDTSKKSSSLLITASRAADTASYFCATD
>V141RF-AQIA01064149.1-trav |(7521, 7812)|2.99899600001|(1.000,0.999,1.000)|1
RTNGDSVTQTEGPVTLPERAALTLNCTYQTSYSAFIFWYVQYPNKEPELLLKSSENQETN
SRGFQASHVKSDSSFHLEKPSVQLSDSAVYYCVLR
>V142RF-AQIA01064149.1-trav |(10740, 11043)|2.99393200206|(0.999,1.000,0.995)|1
SSMAQKVTQAQTEISVVEKEDVTLDCVYETRDTTYYLFWYKQPPSGELVFLVRQNSFDEQ
NEINGRYYSNFQKSTSSFNLTITASQVVDSAVYFCALNE
>V143RF-AQIA01064151.1-trav |(18011, 18298)|3.0|(1.000,1.000,1.000)|1
LSGEDQVTQSPEALSLQEGESSSLNCSYTVSGLRGLFWYRQDPGKGPEFLFSLYSAGEEK
EKERLKATLTKKESFLHITGPKPEDSATYLCAVQ
>V144RF-AQIA01064151.1-trav |(28358, 28657)|2.69742134017|(0.961,0.833,0.967)|1
VSSKQEVTQIPAALSVPEGDNLVLNCSFTDSAIYNLQWFRQDPGKGLTSLLLIQSSQREQ
TSGRLNASLDKSSGRSTLYITASQPSDSATYLCAVRHS
>V145RF-AQIA01064159.1-trav |(7752, 8051)|2.93921501844|(0.991,1.000,0.954)|1
VNGQQIMQIPQYQHVQEGEDFTTYCNSSTTLNNIQWYKQRPGGHPVFLITLVKSGEVKKQ
KRLIFQFGEAKKNSSLHITATQTTDVGTYFCAGHSAPQ
>V146RF-AQIA01064159.1-trav |(18642, 18932)|2.72867031887|(0.973,0.838,0.989)|1
TIIDAKTTQPTSMDCAEGRAANLPCNHSTISGSEYIHWYRQIHSQGPQYVIHGLKNNETN
AMASLIITEDRKSSTLILPHATLRDTAVYYCIVRV
>V147RF-AQIA01064165.1-trav |(18360, 18659)|2.99089600501|(0.999,0.998,0.994)|1
VNGQQIMQIPQYQHVQEGEDFTTYCNSSTTLSNIQWYKQRPGGHPVFLIMLVKSGEVKKQ
KRLTFQSGEAKKNSSLHITATQTTDVGTYFCAGHSAPQ
>V148RF-AQIA01064166.1-trav |(47951, 48275)|1.84575737197|(0.643,0.902,0.562)|1
VNSQQKNDDQQVKQKPPSLSVQEGGISILNCDYTNSMFDYFVWYKKYPAEGPTFLISIRS
VKDKNEEGRFTVFLNKSAKHLSLHIGASQPGDSAVYLCAASAQCSP
>V149RF-AQIA01064166.1-trav |(53434, 53721)|2.83835688246|(0.960,0.915,0.972)|1
VRSQQPVQSPQAVILQEGEDAIINCNSSKALYSVLWYRQKHGEAPIFLMILLKGGEQKSH
DKIVATFNEKKQQSSLYLMASQLSYSGTYFCGAE
>V150RF-AQIA01064166.1-trav |(81458, 81745)|2.13513919683|(0.673,0.780,0.868)|1
VTSQELEQSPQSLIVQEGKNLTINCTSSKTLYGLHWYKQKYGEGLIFLMMLQQGGEEKSH
EKITAKLDEKKQQSFLHITASQPSHAGIYLCGGD
>V151RF-AQIA01064166.1-trav |(99136, 99426)|2.90829798149|(0.987,0.938,0.993)|1
VSSEDKVMQNPLSLVVHEGDTVTLNCSYEVVNFRSLLWYKQEKKAPIFLFTLTSSGIEKK
SGRLSSILDKKDLFSILNITATQTRDSAVYLCAVE
>V152RF-AQIA01064166.1-trdv |(135908, 136209)|2.89314485389|(0.998,0.996,0.922)|1
SGMAQTVTQSQQEMSVQEAETVILSCTYDTSESNYYLFWYKQPPSRQMILIIRQEAYKQQ
NATENRFSVNFQKAAKSFSLKISDSQLGDAAMYFCAFM
>V153RF-AQIA01064166.1-trav |(145402, 145702)|3.0|(1.000,1.000,1.000)|1
SGMAQTVTQSQPEMSVQEAETVTLSCTYDTSDSDYYLFWYKQPPSRQMILIIRQEAYKQQ
NATENRFSVNFQKATKSFSLKISDSQLGDAAMYFCAYR
>V154RF-AQIA01064166.1-trav |(168980, 169268)|3.0|(1.000,1.000,1.000)|1
LSGELKVGQNPLFLSTQEGKNYTIYCNYSTASDRLYWYRQDPGKSLESLFVLLSNGAVKQ
EGRLMASLDTKARLSSLHITAALQDLSATYFCAV
>V155RF-AQIA01064167.1-trav |(16150, 16452)|1.57980343937|(0.567,0.458,0.807)|1
VSAAKNEVEQSPQDLTAQEGEFITINCSYSIGINSLHWLQQHPGGGIVSLFMLSSEKKKN
GRLIATINIQERHSSLHITASQPRDSAIYICAVRHSALQ
>V156RF-AQIA01075814.1-ighv |(1456, 1765)|3.0|(1.000,1.000,1.000)|1
VLSQVQLQESGPGLVKPSETLSLTCAVSGGSISGYYWNWIRQPPGKGLEWIGYIGGSSGS
TYYNPSLKSRVTISTDTSKNQFSLKLSSVTAADTAVYYCAR
>V157RF-AQIA01075814.1-ighv |(38413, 38722)|2.98574002125|(0.999,0.995,0.992)|1
AHSQVQLVQSGAEVKKPGSSVKVSCKASGYTFTDYYMHWVRQAPGQGLEWMGEINPKTGG
TNYAQKFQGRVTMTRDTSTSTAYMELSSLRSEDTAVYYCAR
>V158RF-AQIA01075814.1-ighv |(41318, 41631)|3.0|(1.000,1.000,1.000)|1
VQCEVQLVESGGGLVQPGGSLRLSCAASGFTFGDYGMSWVRQAPGKGLEWVGRIRNKANS
YTTEYAASVKGRFTISRDDSKNTLYLQMSSLKTEDTAVYYCT
>V159RF-AQIA01075814.1-ighv |(48089, 48398)|3.0|(1.000,1.000,1.000)|1
VQCEVQLVESGGGLVQPGGSLRLSCAASGFTFSSYDMSWVRQAPGKGLEWVSFISNTGKT
IYYADSVKGRFTISRDNAKNSLSLQMSSLRAEDTAVYYCTR
>V160RF-AQIA01075815.1-ighv |(2731, 3045)|1.95103930275|(0.904,0.527,0.972)|1
VLSQVTLKESGPALVKPTQTLTLTCTFSGFSLSTSGMGVGWIRQPSRKTLEWLAHIYWDD
DKRYSTSLKSRLTISKDTSKNQVVLTMTNMDPVDTATYYCARR
>V161RF-AQIA01075818.1-ighv |(5347, 5656)|2.86032945957|(0.965,0.917,0.990)|1
VLSQVQLQESGPGLVKPSETLPLTCTVSGASISSNYWSWIRQPPGKGLEWIGRIYGSGGS
TDYNPSLKSRVTISIDTSKNQFSLKLSSVTAADTAVYYCAR
>V162RF-AQIA01075820.1-ighv |(24543, 24849)|2.99093200206|(0.996,0.995,1.000)|1
VQCVEQLVESGGGLVQPGASLRLSCAASEFTFSSYDMHWVRQAPGKGLEWVSAISIGGGT
YYPDSVKGRFTISRDNAKNSLYLQMNSLRAEDTAVYYCAR
>V163RF-AQIA01075821.1-ighv |(6780, 7092)|2.98875601537|(1.000,0.994,0.995)|1
VLSQVQLQESGPGLVKPSETLSLTCAVSGGSISSGYYWGWIRQPPGKGLEWIGSIYGSGG
SNYLNPSLKSRVTLSVDTSKNQFSLKLSSVTAADTAVYYCAR
>V164RF-AQIA01075823.1-ighv |(9677, 9986)|3.0|(1.000,1.000,1.000)|1
VQCEVQLVESGGGLAKPGGSLRLSCAASGFSFSDYYMYWVRQAPGKGLEWVSGISYTGGS
TYYADSVKGRFTISRENAKNTLYLQMDSLRAEDTAVYYCAR
>V165RF-AQIA01075825.1-ighv |(15487, 15796)|3.0|(1.000,1.000,1.000)|1
VQCEVQLVESGGGLVQPGGSLRLSCAASGFTFSSYWMYWVRQAPGKGLEWVSRISSDGSS
TSYADSVKGRFTISRENAKNSLYLQMNSLRAEDTAVYYCAK
>V166RF-AQIA01075825.1-ighv |(23332, 23647)|3.0|(1.000,1.000,1.000)|1
VQCEVQLVESGGGLVQPGGSLRLSCAASGFTFSSSAMHWVRQASGKGLEWVGRIRSKSNN
YETGYAASVKGRFTISRDDSKNTAYLQMNSLKTEDTAVYYCTT
>V167RF-AQIA01075826.1-ighv |(7442, 7757)|3.0|(1.000,1.000,1.000)|1
VQCEVQLVESGGGLVQPGGSLRLSCAASGFTFSDYYMSWVRQAPGKGPEWVGFIRNKANG
GTAEYAASVKGRFTISRDDSKSIASLQMNSLKTEDTAVYYCAR
>V168RF-AQIA01075827.1-ighv |(12747, 13054)|3.0|(1.000,1.000,1.000)|1
VQCEVQLAESGGGLVQPGGSLRLSCAASGFTFSSYEMHWVRQAPGKGLESVSVIGGDSSY
THYADSVKGRFTISRDNAKNSLSLQMNSLRAEDTAVYYCA
>V169RF-AQIA01075830.1-ighv |(638, 945)|2.9611161971|(0.987,0.998,0.977)|1
AHSQVQLVQSGAEVKQPGASVKVSCKASGYTFTSYGMNWLRQAPGQRLEWMGGINTNTGN
PTYAQGFKERFTFSMDTSISTAYLQISSLKAEDTAVYYCA
>V170RF-AQIA01075832.1-ighv |(13782, 14094)|3.0|(1.000,1.000,1.000)|1
VLSQVQLQESGPGLVKPSETLSLTCAVSGGSISSGYYWSWIRQPPGKGLEWIGYIYGSSG
STYYNPSLKSRVTISKDTSKNQFSLKLSSVTAADTAVYYCAR
>V171RF-AQIA01075832.1-ighv |(26831, 27140)|3.0|(1.000,1.000,1.000)|1
VQCEVQLVESGGGLAKPGGSLRLSCAASGFTFSSYWMYWVRQAPGKGLEWISAISSGGGS
TYYADSVKGRFTISRDNSKNTLSLQMNSLRAEDTAVYYCAK
>V172RF-AQIA01075832.1-ighv |(39067, 39376)|2.99899200002|(0.999,1.000,1.000)|1
VQCDVQLVESGGGLVKPGGSLRLSCVASGFTFSSYVMHWVRQAPGKGLEWVSVISESGGT
IYYADSVKGRFTISRDNAKNSLFLQMNSLRAEDTAVYYCTR
>V173RF-AQIA01075832.1-ighv |(43031, 43343)|2.95487920684|(0.970,0.991,0.999)|1
VLSQVQLQESGPGLVKPSETLSLTCAVSGYSISSGYYWGWIRQPPGKGLEYIGYISGSSG
STYYNPSLKSRVTISKDTSKNQFSLKLSSVTAADTAVYYCAR
>V174RF-AQIA01075834.1-ighv |(701, 1011)|2.97909640489|(0.998,0.999,0.983)|1
VLSQVQLQESGPGLVKPSETLSLTCAVSGGSISSSNWWSWIRQSPGKGLEWIGGIYGSGG
STEYNPSLKSRVTISIDTSKNQFSLKLSSVTAADTAVYYCA
>V175RF-AQIA01075834.1-ighv |(15808, 16117)|3.0|(1.000,1.000,1.000)|1
VLSQVQLQESGPGLVKPSETLSLTCAVSGGSISGYYWSWIRQSPGKGLEWIGYIYGSGSS
TNYNPSLKSRVTISKDTSKNQFSLKLSSVTAADTAVYYCAR
>V176RF-AQIA01075844.1-ighv |(4662, 4971)|3.0|(1.000,1.000,1.000)|1
VLSQVQLQESGPGLVKPSETLSLTCAVSGGSISSNYWSWIRQPPGKGLEWIGNIDGNTAD
TNYNPSLKSRVTISKDTSKNQFSLKLSSVTAADTAVYYCAR
>V177RF-AQIA01075848.1-ighv |(16337, 16646)|2.78846330217|(0.977,0.865,0.997)|1
AQSQVQLVQSGAEVKKPGASVKLSCKASGYTFTSYYINWVRQAPEQVLDWMGWINPSNGN
TGYAQKFQGRVTMTRDTSTSTAYMELNSLRSEDTAVYYCAR
>V178RF-AQIA01075848.1-ighv |(34897, 35206)|2.95890837717|(0.998,0.999,0.966)|1
AQSQVQLVQSGAEVKKPGASVKVSCKASGFTFGSYAISWVRQAPGQGLEWMGGIIPLVGI
TNYAEKFQGRVTITADTSTSTAYMELSSLRSEDTAVYYCAR
>V179RF-AQIA01075855.1-ighv |(3762, 4071)|2.99798400013|(1.000,1.000,0.998)|1
VLSQVQLQESGPGLVKPSETLSLTCAVSGGSISSNYWSWIRQPPGKGLEWIGYIYGSGSS
TNYNPSLKSRVTLSVDTSKNQLSLKLSSVTAADTAVYYCAR
>V180RF-AQIA01075856.1-ighv |(13880, 14195)|2.99899600001|(1.000,0.999,1.000)|1
VLSQVQLQESGPGLVKPSETLSLTCAVSGGSISGGYYYWSWIRQPPGKGLEWIGNIYGNS
ASTYYNPSLKSRVTISKDTSKNQFSLKLSSVTAADTAVYYCAR
>V181RF-AQIA01075857.1-ighv |(5233, 5548)|2.99174403277|(1.000,0.992,1.000)|1
VLSQVQLQESGPGVVKPSETLSLTCAVSGGSISSGYYYWSWIRQPPGKGLEWIGGIYSNS
ESTNYNPSLKSRVTISKDTSKNQFSLKLSSVTAADTAVYYCAR
>V182RF-AQIA01075859.1-ighv |(15555, 15867)|3.0|(1.000,1.000,1.000)|1
VLSQVQLQESGPGLVKPSETLSLTCAVSGGSISDSYWWSWIRQPPGKGLEWIGYIYGSST
STNYNPSLKSRVTISKDTSKNQFSLKLSSVTAADTAVYYCAR
>V183RF-AQIA01075860.1-ighv |(3491, 3803)|3.0|(1.000,1.000,1.000)|1
VLSQVQLQESGPGLVKPSETLSLTCAVSGGSISSSNWWSWIRQPPGKGLEWIGNIGGSSG
STYYNPSLKSRVTISKDTSKNQFSLKLSSVTAADTAVYYCAR
>V184RF-AQIA01075862.1-ighv |(11827, 12136)|3.0|(1.000,1.000,1.000)|1
VQCEVQLVESGGGLAKPGGSLRLSCAASGFTFSDYYMHWVRQASGKGLEWVSSISNGGGS
TWYADSVKGRFTISRENAKNTLYLQMDGLRAEDTAVYYCAR
>V185RF-AQIA01075862.1-ighv |(19656, 19971)|2.46773346211|(0.789,0.987,1.000)|1
VKCEAQLMETGGGLVQPGGSLRLSCAASGFTFSDHYMQWVRQAPGKGLEWVGLIRNKADG
ETTDYAASVKGRFTISRDDSKSITYLQMNNLKTEDTAVNYCAR
>V186RF-AQIA01075862.1-ighv |(23165, 23477)|2.989900005|(0.995,1.000,0.995)|1
VLSQVQLQESGPGLVKPSETLSLTCAVSGGSISSSNWWSWIRQPPGKGLEWIGRISGSGG
STSYNPSLKSRVTISKDTSKNQFSLKLSSVTAADTAVYYCAR
>V187RF-AQIA01075862.1-ighv |(31521, 31830)|2.89272090161|(0.999,1.000,0.919)|1
VQCEVQLVESGGGLVQPGGSLRLSCAASGFTFSSYGMHWVCQAPGKGLEWVAVISYDGSQ
KYYADSVKDRFTISRDNSNNMLYLQMNNLKLEDTAVYYCAT
>V188RF-AQIA01075862.1-ighv |(73169, 73478)|2.97810021834|(1.000,0.991,0.988)|1
VQCEVQLVESGGGLVQPGASLRLSCAASGFTFSSTRMNWIRQAPGKRLEWVTDIKYDGSE
KYYVDSVKGRFTISRDNAKNSLYLQMNSLRAEDTAVYYCVR
>V189RF-AQIA01075862.1-ighv |(80457, 80766)|2.93003383388|(0.996,0.998,0.946)|1
VCAEVQLVQSGAEVKRPGESLRISCKTSGYSFTSSWISWVRQMPGKGLEWMGSIYPGDSD
TRYNPSFQGHVTISADKSISTTYLQWSSLKASDTATYYCAK
>V190RF-AQIA01075865.1-ighv |(14324, 14639)|3.0|(1.000,1.000,1.000)|1
VQCEVQLVESGGALAQPGGSLRLSCAASGFTFSDYYMDWVHQAPGKGLEWVGRIRNKANS
YTTEYAASVKGRFTISRDDSKNTLYLQMSSLKTEDTAVYYCAR
>V191RF-AQIA01075867.1-ighv |(12905, 13214)|2.4883391487|(0.989,1.000,0.732)|1
VQCEVQLVESGGGLAKPGGSLRLSCAASGFSFSDYYMYWVRQAPGKGLEWVSSISGSSSS
TYYPDSVKGRFTISRDNAKNTLYLQMNSPRAEDTAVYYCAR
>V192RF-AQIA01075867.1-ighv |(22147, 22453)|2.99899600001|(1.000,0.999,1.000)|1
VQCEVQLVESGGGLVQPGGSLRLSCGFTFSDHYMSWVRQAPGKGPEWVGFMRNKANGGTT
EYATSVKGRFTISRGDSKSIASLQMSSLKTEDTAVYYCAR
>V193RF-AQIA01075868.1-ighv |(2740, 3049)|3.0|(1.000,1.000,1.000)|1
VQCEVKLVESGGGLVQPGGSLRLSCAASGFTFSNYWMFWVRQAPGKGLEWVSSISGSSSS
TYYPDSVKGRFTISRDNAKNTLYLQMNSLRAEDTAVYYCAR
>V194RF-AQIA01075868.1-ighv |(14808, 15114)|2.91114025044|(1.000,0.933,0.996)|1
VQCEVQLVESGGGLVQPGGSLRLSCAASGFTSGNSDLIWIRQAPGKGLEWVSYISSGGSI
YYSDSVKGRFTISRDNAKNTLYLQMSSLRVEDTAVYYCAK
>V195RF-AQIA01075871.1-ighv |(1079, 1388)|2.97002424585|(0.983,0.993,0.995)|1
VQCEVQLVESGGGLVQPGGSLRLSCAASGFTFSNAWMNWVRQAPGKGLVWVARIKSKANG
ETADYAASVKGRFTISRDDSKNTLYLQMNSLKTEDTAVYYC
>V196RF-AQIA01007908.1-igkv |(8863, 9163)|3.0|(1.000,1.000,1.000)|-1
ARCDIQMTQSPSSQSASVGDRVTITCQASQSLSNYLNWYQQKPGKIPKLLIYRASSLQSG
IPSRFSGSGSGTDFTLTISSLQPEDFATYYCQQGYSYP
>V197RF-AQIA01017094.1-igkv |(128027, 128344)|2.2895986353|(0.952,0.675,0.929)|-1
TSGAIPLTQTPLSLPVTPGEPASISCRSSQSLLHSNGNTYLHWYLQKPGQSPQLLIYEVS
NRASGVPERFSGSGSDTDFTLKINLVEAEDVGVYYCMQTTQCPP
>V198RF-AQIA01017094.1-igkv |(132911, 133229)|2.96363465422|(0.998,0.974,0.994)|-1
STGDIVMTQTPLSLPVTLGEPASISCRSSQSLLDSEDGNTYLDWYLQKPGQSPQLLIYEV
SNRASGVPDRFSGSGSDTDFTLKISRVEAEDVGVYYCMQGIEYP
>V199RF-AQIA01017118.1-igkv |(14570, 14870)|3.0|(1.000,1.000,1.000)|-1
ARCDIQMTQSPSSLSASVGDRVTITCRASQGINNYLSWYQQKPGKAPKPLIYYASSLETG
VPSRFSGSGSGTDYTLTISSLQPEDIATYYCQQYNNSP
>V200RF-AQIA01017118.1-igkv |(20337, 20639)|2.99899200002|(0.999,1.000,1.000)|-1
SSGDVVMTQSPLSLPITPGQPASISCRSSQSLVHSDGKTYLNWLQQKPGQPPRRLIYQVS
NRDSGVPDRFSGSGAGTDFTLKISRVEAEDVGVYYCMQG
>V201RF-AQIA01017118.1-igkv |(36827, 37129)|2.96486491212|(0.999,0.998,0.971)|-1
SSGDVVMTQSPLSLPITPGQPASISCRSSQSLVHSNGNTYLSWYQQKPGQPPRLLIYQVS
NRDSGVPDRFSGSGAGTDFTLKISRVEAEDVGVYYCGQG
>V202RF-AQIA01017118.1-igkv |(47001, 47316)|2.9803601679|(0.999,0.995,0.987)|-1
SGGDIVMTQTPLSLPVTPGEPASISCRSSQSLLHTDGYTYLDWYLQKPGQSPQLLIYGGS
NRASGVPDRFSGSGSGTDFTLKISKVEAEDVGVYYCMQHKALP
>V203RF-AQIA01017118.1-igkv |(71244, 71559)|2.96764165191|(1.000,0.971,1.000)|-1
SSGDIVMTQTPLSLPVTLGEPASISCRSSQSLLSSNGYNYLNWYLQKPGQSPQLLIYYGS
NRASGVPDRFSGSGSGTDFTLKISRVEAEDVGVYYCMQALQTP
>V204RF-AQIA01017118.1-igkv |(79515, 79815)|2.95437067436|(0.997,0.999,0.963)|-1
TRCAIQMTQSPSSLSASVGDTVTITCRASQSIGSNLAWYQQKPGKVPKLLIYAASTLQSE
VPSRFSGSGSGTDFTLTISSLQPEEVATYYCQKCDSAP
>V205RF-AQIA01017118.1-igkv |(115261, 115563)|2.97578054332|(1.000,0.984,0.993)|-1
STGDVVMTQSPLSLPVTLGQPASISCRSSQSLLHSNGNTYLSWFQQKPGQSPRRLIYKVS
NRDSGVPDRFSGSGAGTDFTLKISRVEAEDVGVYYCMEG
>V206RF-AQIA01017118.1-igkv |(131697, 131995)|2.86230853561|(0.999,0.901,1.000)|-1
SKGEIVLTQSPAFQSVTLKEKVTITCQASQSIGSSLHWYQQKPDQSPKLLIKYASQSISG
VPSRFSGSGSGTDFTLTINSLEAEDAATYYCQQSSSF
>V207RF-AQIA01017118.1-igkv |(160930, 161230)|2.99385601037|(1.000,0.994,1.000)|-1
TTGQVVLTQSPATLSLSPGERATLSCRASQSVSSSLAWYQQKPGQAPRLLIYGASSRATG
IPDRFSGSGSGTEFTLTISSLEPEDFAVYYCQKYSSSP
>V208RF-AQIA01017118.1-igkv |(166412, 166712)|3.0|(1.000,1.000,1.000)|-1
VRCDIQMTQAPSFLSASVGDRVTITCQASQSISNDLAWYQQKPGKSPTLLIYDATNLHTG
VPSRFSGSGSGADYSLTISSLELEDFAAYYCQQEYSYP
>V209RF-AQIA01017120.1-igkv |(6524, 6816)|2.85365853484|(1.000,0.896,1.000)|-1
SRGDIVMTQSPAFVSVTPGEKVTITCQASEGISNYLHWYQQKPDQAPKLFIQYASQSISG
VPSRFTGSGSGTDFTFTISSLEVEDAATYYCQQGN
>V210RF-AQIA01017120.1-igkv |(22790, 23081)|2.99899600001|(1.000,1.000,0.999)|-1
DIQMTQSPSSLSASVGDTVTITCRASQSFSSSLAWYQQKPGKAPKLLIYSASSLQSGVPS
RFSGSKSGTDFTLTISSLQPEDIASYYCQQYYSYP
>V211RF-AQIA01017120.1-igkv |(38344, 38636)|3.0|(1.000,1.000,1.000)|-1
AKCDIQMTQSPSSLSASVGDRVTITCRASQTISSYLAWYQQKPGKVPKLLIYAASSLESG
VPSRFSGSGSGTEFTLTISSLQPEDFATYYCQQHN
>V212RF-AQIA01017120.1-igkv |(57654, 57954)|2.99696400065|(1.000,1.000,0.997)|-1
ARCDIQMTQSPSSLSASVGDRVTITCRASQGISTYLNWYQQKPGKAPKLLIYAASSLQSG
VPSRFSGSGSGTEFTLTISSLQPEDFATYYCLQYNSKP
>V213RF-AQIA01017120.1-igkv |(72400, 72698)|2.99798400013|(1.000,1.000,0.998)|-1
TTGEIVMTQSPATLSLSPGERATLSCRASQSVSSSLAWYQQKPGQAPRLLIYGASSRATG
IPDRFSGSGSGTEFTLTISSLEPEDFAVYYCQQYSNW
>V214RF-AQIA01017120.1-igkv |(84992, 85292)|2.99696400065|(1.000,1.000,0.997)|-1
ARCDIQMTQSPSSLSASVGDRVTITCRASQGISNYLNWYQQKPGKAPKLLIYAASSLQSG
VPSRFSGSGSGTEFTLTISSLQPEDFATYYCQPFKNYL
>V215RF-AQIA01017122.1-igkv |(11088, 11376)|2.70545458293|(0.861,0.972,0.956)|-1
IVMTQSPATLSLSPGETATLSCRASQSVGSYLAWYQQKPGQAPKLLVHSAYFRATGIPDR
FSGSGSRTEFTLTISSLEPEDVGVYHCQQYNDLL
>V216RF-AQIA01017123.1-igkv |(8475, 8775)|3.0|(1.000,1.000,1.000)|-1
ARCDIQLTQSPSSLSASVGDRVTITCRASQGISSYLAWYQQKPGKAPKLLIYKASTLQSG
VPSRFSGSGSGTDFTLTISSLQPEDFAVYYCQQRNSYP
>V217RF-AQIA01017123.1-igkv |(15101, 15401)|3.0|(1.000,1.000,1.000)|-1
AKCDIQMTQSPSSLSASVGDRVTITCRASQGISSYLAWYQQKPGKAPKPLIYYASNLESG
VPSRFSGSGSGTEFTLTISSLQPEDFATYYCQQYNSDP
>V218RF-AQIA01017123.1-igkv |(32082, 32382)|2.98742416586|(1.000,1.000,0.988)|-1
ARCDIQMTQSPSSLSASVGDRVTITCRASQGISNYLSWYQQKPGKAPKLLIYAASSLQSG
VPSRFSGSGSGTEFTLTISSLQPEDFATYYCLQGYSTP
>V219RF-AQIA01017123.1-igkv |(42629, 42935)|2.99899200002|(0.999,1.000,1.000)|-1
TVMTQSPATLSLSPGERATLSCRASQSVSSSLAWYQQKPGQAPRLLIYYASSRATGIPDR
FSGSGSGTEFTLTISSTLTISSLDPEDVGVYYCQKYNDWP
>V220RF-AQIA01017125.1-igkv |(705, 1005)|3.0|(1.000,1.000,1.000)|-1
ARCDIQLTQSPSSLSASVGDRVTITCRASQGISSYLAWYQQKPGKAPKLLIYAASNLQSG
VPSRFSGSGSGTDFTLTISSLQPEDFAVYYCQQRNSYP
>V221RF-AQIA01017126.1-igkv |(2367, 2667)|2.99798400013|(1.000,1.000,0.998)|-1
ARCDIQMTQSPSSLSASVGDRVTITCRASQGISSYLNWYQQKPGKAPKLLIYYANSLASG
VPSRFSGSGSGTDYTLTISSLQPEDFATYYCQQGNSNP
>V222RF-AQIA01017126.1-igkv |(20855, 21155)|2.99899600001|(1.000,0.999,1.000)|-1
TTGEIVMTQSPATLSLSPGETATISCRTSQSVSSYLAWYQQKPGQAPRLLIYGASSRATG
IPDRFSGSGSGTDFTLTISSLEPEDFAVYYCQETSNLS
>V223RF-AQIA01017128.1-igkv |(28886, 29186)|2.99899600001|(1.000,0.999,1.000)|-1
ARCDIQMTQSPSSLSASVGDTVTITCRASQGISSYLNWFQQKPGKAPKLLIYAASSLESG
VPSRFSGSGSGTEFTLTISSLQPEDFATYYCLQYNSYP
>V224RF-AQIA01017128.1-igkv |(35341, 35641)|2.84170644025|(0.977,1.000,0.894)|-1
ARCDIQMTQSPSSLSASVGDRVTITCQASQGISSWLAWYQQKPGKAPKLLLYKAPGLQSG
VPSMFSGSGSGTEFTLTISSLQPEYFATYYCQQFSSAL
>V225RF-AQIA01017128.1-igkv |(51771, 52071)|3.0|(1.000,1.000,1.000)|-1
TTGEIVMTQSPATLSLSPGERATLSCRASQSVSSRLAWYQQKPGQAPRLLIYGASSRATG
IPDRFSGSGSGTEFTLTISSLEPEDVGVYYCQQDYSWP
>V226RF-AQIA01017128.1-igkv |(94686, 94986)|3.0|(1.000,1.000,1.000)|-1
ARCDIQMTQSPSSLSASVGDRVTITCRASQGISSYLAWYQQKPGKAPKLLIYDASNLQSG
VPSRFSGSGSGTDFTLTISSLQPEDFATYYCQQHNSYP
>V227RF-AQIA01017128.1-igkv |(113498, 113796)|2.97369865217|(1.000,1.000,0.976)|-1
TTGEIVMTQSPATLSLSPGERATLSCRASQSVSSSLAWYQQKPGQAPRLLIYGASSRATG
IPDRFSGSGSGTDFTLTISSLEPEDVAVYYCLQRSNW
>V228RF-AQIA01017130.1-igkv |(1559, 1859)|2.99899600001|(1.000,1.000,0.999)|-1
ARCDIQMTQSPSSLSASVGDKVTITCHASQGISSWLAWYQQKPGKAPKPLIYKASSLQSG
VPSRFSGSGSGTDYTLTISSLQPEDFATYYCQQYDNLP
>V229RF-AQIA01017133.1-igkv |(667, 967)|3.0|(1.000,1.000,1.000)|-1
ARCDIQMTQSPSSLSASVGDKVTITCHASQGISSWLAWYQQKPGKAPKPLIYKASSLQSG
VPSRFSGSGSGTDFTLTISSLQPEDFATYYCQQYSSYP
>V230RF-AQIA01017135.1-igkv |(10903, 11203)|2.99899600001|(1.000,0.999,1.000)|-1
AKCDIQMTQSPSSLSASVGDKVTITCQASQSISSWLAWYQQKPGKAPKPLIYKASSLESG
VPSRFSGSGSGTDFTLTISSLQPEDFATYYCQQHNSYP
>V231RF-AQIA01017135.1-igkv |(26554, 26853)|2.997|(0.999,0.999,0.999)|-1
TTGETVMTQSPATLSLSPGERATLSCRASQSVGSTLAWYQQKPGQAPRLLIYGASSRATG
IPDRFSGSGSGTEFTLTISSLEPEDVGVYYCQQESNWK
>V232RF-AQIA01017139.1-igkv |(38517, 38829)|2.99596800026|(1.000,0.998,0.998)|-1
CNGDIVLTQSPASLAVSPGQRATITCRASESVSFFGINLIHWYQQKPGQPPKLLIYQASN
KDTGVPARFSGSGSGTDFTLTINPVEADDAADYYCLQSKNSP
>V233RF-AQIA01017139.1-igkv |(56358, 56649)|2.85641275851|(0.989,0.999,0.900)|-1
IVLTQSPTSMAVSQGERVTISCTASSSVSTSYLHWYQQKPGFPPRLLVYRTSSLASGVPA
RFSGSGSGTSYTLTISSMEAEDAANYYCQQAHSIP
>V234RF-AQIA01064169.1-trav |(156383, 156689)|1.77267100508|(0.616,0.568,0.599)|-1
RGMLCDKVTQSSPDQMVASGSEVVLLCTYDSTYSDPGLFWYRIRPDYNFQFVFYGDKSRS
HGSYFAKGRFSVKHLLTQKAFHLVISPVSTEDSATYYCAM
>V235RF-AQIA01066360.1-ighv |(8136, 8449)|2.96764165191|(1.000,1.000,0.971)|-1
VQCEVQLVESGGGLVQPGGSLRLSCAASGFTFSNYYMHWVRQAQGKGLEWVGLIRNKANS
YTTEYAAAVKGRFTISRDDSKNTLYLQMSSLKTEDTALYYCT
>V236RF-AQIA01066360.1-ighv |(18228, 18531)|2.26158356754|(0.985,0.646,1.000)|-1
VQCEVQLAESGGGLVQPGRSLRPSCAASGFTFSSYGMHWVRQAPEEGLEWVSYIGSSTMY
YADSVKGRFTISRDNAKNSLYLQMNSLRAEDTAVYYCVR
>V237RF-AQIA01066360.1-ighv |(57288, 57597)|2.98998400013|(0.996,0.996,0.998)|-1
VQCEVQLVESGGGLVQPGGSLRLSCTGSGFTFSSYYMYWIRQAPGKGLQWVSAINTGGGS
TWYTDSVKGRFTISKENAKNTLYLQMDSLRAEDTAVYYCAK
>V238RF-AQIA01066362.1-ighv |(1746, 2054)|2.97020015998|(0.997,0.987,0.987)|-1
VQGEVQLVESEGNFVQPGGSLRLSCAASGFTFSSCDLDWIRHAPGKGLEWVSGISIAGST
YYANSVKGRFAISRGNAKNTLYLQMYSLIAEDTAIYYCVSE
>V239RF-AQIA01066362.1-ighv |(12791, 13106)|3.0|(1.000,1.000,1.000)|-1
VQCEVQLVESGGGLVQPGGSLRLSCAASGFTFSNYWMSWVRQAPGKGLEWVGFIKNKADG
GTAAYAESVKGRFTISRDDSKNTLYLQMNSLKTEDTAVYYCTR
>V240RF-AQIA01066366.1-ighv |(294, 607)|3.0|(1.000,1.000,1.000)|-1
VQCEVQLVESGGGLVQPGGSLRLSCAASGFTFSNYWMSWVRQAPGKGLEWVGFIKNKADG
GTADYAASVKGRFTISRDDSKNTLYLQMSSLKTEDTAVYYCT
>V241RF-AQIA01066369.1-ighv |(10385, 10694)|2.98551611711|(0.999,0.999,0.988)|-1
VCAEVQLVQSGAEVKRPGESLKISCKTSGYSFTSYWISWVRQMPGKGLEWMGAIDPSDSD
TRYSPSFQGQVTISADKSISTAYLQWSSLKASDSATYYCAK
>V242RF-AQIA01066369.1-ighv |(30516, 30824)|2.97020015998|(0.997,0.987,0.987)|-1
VQGEVQLVESEGNFVQPGGSLRLSCAASGFTFSSCDLDWIRHAPGKGLEWVSGISIAGST
YYANSVKGRFAISRGNAKNTLYLQMYSLIAEDTAIYYCVSE
>V243RF-AQIA01066378.1-ighv |(784, 1093)|2.99293600205|(0.999,0.995,0.999)|-1
VQGEVQLVESGGGLAKPGGSLRLSCAASGFTFSSYWMHWVRQAPGKGLEWISAINSAGSS
TYYADSVKGRFTISRENAKNTLYLQMDGLRAEDTAVYYCAG
>V244RF-AQIA01066385.1-ighv |(742, 1051)|2.95648712253|(0.994,0.996,0.969)|-1
AHSEVQLVQSGAELKKPGASVKVSCKVSGYTFTELSMHWVRQVPGKGLEWMGGVDPVYGE
IIHAEKFQGRVTMTEDTSTDTAYMELSSLRSEDTAVYYCAR
>V245RF-AQIA01066385.1-ighv |(14117, 14432)|3.0|(1.000,1.000,1.000)|-1
VQCEVQLVESGGGLVQPGGSLRLSCAASGFTFSDYAMDWVRQAPGKGLEWVGFIRSKAYG
GTAEYAASVKGRFTISRDDSKNTAYLQMSSLKTEDTAVYYCTR
>V246RF-AQIA01066387.1-ighv |(6564, 6873)|3.0|(1.000,1.000,1.000)|-1
VQCEVQLVESGGGLVQPGGSLRLSCAASGFTFGDYGMHWVRQAPGKGLEWVSSISNTGKT
IYYADSVKGRFTVSRDNAKNSLSLQMSSLRAEDTAVYYCTR
>V247RF-AQIA01066387.1-ighv |(11668, 11974)|3.0|(1.000,1.000,1.000)|-1
VQCEVQLVESGGGLVQPGGSLRLSCAASGFTFSSYGMSWVRQAPGKGLEWVSAISSGGST
YYADSVKGRFTISRDNSKNTLSLQMNSLRAEDTAVYYCAK
>V248RF-AQIA01066387.1-ighv |(59837, 60146)|2.99899200002|(0.999,1.000,1.000)|-1
AHSQVQLVQSGAEIKQPGASVKLSCKASGYTFTSYYMHWVRQAPGQGLEWIGLISPYNGN
KGYAQNFQGRVTITTDTSTSTGYMELSSLRSEDTAVYYCTR
>V249RF-AQIA01066387.1-ighv |(66519, 66828)|3.0|(1.000,1.000,1.000)|-1
VQCEVQLVESGGGLAKPGGSLRLSCAASGFTFSDYYMDWVRQAPGKGLEWVSRISNGGGS
TWYADSVKGRFTISRENAKNTLYLQMNSLRAEDTAVYYCAR
>V250RF-AQIA01066387.1-ighv |(78167, 78474)|1.9666636875|(0.990,1.000,0.537)|-1
VQCEVQLVESGGGLVQPGGSLRLSCAASGFTFSDDYMEWVRQAPGKGLEWVGQINPNGGT
TFLMDSVKGRFTISRDNAKNTLYLQINSLKIEDTAVYYCT
>V251RF-AQIA01066387.1-ighv |(87163, 87466)|2.99696400065|(1.000,1.000,0.997)|-1
VQCEVQLAESGGGLVQPGGSLRLSCAASGFTISSYWMSWVCQAPGKGLEWLSDIYGSTMY
YGDSVKGLFTVSRDNAKNSLYLQMNSLRAEDTAVYYCTR
>V252RF-AQIA01066387.1-ighv |(93938, 94252)|2.89060724756|(0.998,0.923,0.992)|-1
VLSQVTLKESGPALVKPTQTLTLTCTFSGFSLTTSGMGVGWIRQPPGKALEWLASIYWDD
DKYYSTSLKSRLTISKDTSKNQVVLTMTNMDPVDTATYYCARR
>V253RF-AQIA01066387.1-ighv |(108611, 108920)|2.99499600001|(0.998,0.998,0.999)|-1
VLSQLQLQESGPGLVKPSETLSLTCAVSGGSISSNYWSWIRQPPGKGLEWIGRISGSGGS
TDYNPSLKSRVTISTDTSKNQFSLKLSSVTAADTAVYYCAR
>V254RF-AQIA01066395.1-ighv |(6190, 6505)|2.95970803341|(0.983,0.991,0.986)|-1
VQCEVQLVESGGGLVQPGGSLRPSCAASGFTFSSSAMHWVRQASGKGLEWVGRIRSKSNN
YATEYAASVKGRFTISRDDSKNTACLQMSSLKTEDTAVYYCAR
>V255RF-AQIA01066395.1-ighv |(16120, 16435)|3.0|(1.000,1.000,1.000)|-1
VQCEVQLVESGGGLVQPGGSLRLSCAASGFTFSDHYMFWVRQAPGKGLEWVGFIRSKAYG
GTAEYAASVKGRFTISRDDSKSIAYLQMSSLKTEDTAVYYCTR
>V256RF-AQIA01066397.1-ighv |(6540, 6849)|2.98521630725|(1.000,1.000,0.986)|-1
AHSQVQLVQSGPEVKQPGASVKVSCKASGYSFTTYGMNWVRQAPGQGLEWMGWMNTYTGN
PTYAQGFTERFVFSMDTSVSTVYLQISSLKGEDTAVYYCAR
>V257RF-AQIA01066397.1-ighv |(62192, 62507)|2.99899600001|(1.000,0.999,1.000)|-1
VQCEVQLVESGGGLVQPGGSLRLSCAASGFTFSNHYMYWVRQAPGKGLEWVGFIRSKAYG
GTAEYAASVKGRFTISRDDSKNTAYLQMSSLKTEDTAVYYCTR
>V258RF-AQIA01073275.1-ighv |(1217, 1526)|2.99494800078|(1.000,0.998,0.997)|-1
DHSEVQLVQSGAEVKKPGASVKISCKASGYTFTDYYLHWVRQAPGKGLEWMGRVDPEDGE
ADYAQKFQDRVTITADTSTDTAYMELSSLRSEDTAVYYCAT
>V259RF-AQIA01073275.1-ighv |(9357, 9667)|2.99798400013|(1.000,1.000,0.998)|-1
VQCEVQLVESGGGLVQPGGSLRLSCVASGFTFSDHYMDWVRQAPGKGLEWVSSISTGSGS
TTLYPDSVKGRFTISRDNAKNTVYLQMNSLRAEDTAVYYCA
>V260RF-AQIA01075132.1-igkv |(288, 575)|3.0|(1.000,1.000,1.000)|-1
TVMTQSPATLSLSPGERATLSCRASQSVGSNLAWYQQKPGQAPRLLIYDASSRATGIPDR
FSGSGSGTEFTLTISSLEPEDVGVYYCQQYNNWN
>V0RF-AGCE01061995.1-trbv |(4895, 5202)|2.94828667923|(0.994,0.999,0.960)|1
PVTAGVTQTPKFQVLKSGQSMTLQCAQDMNHDGMYWYRQDPGMGLRLIHYSVGEGTTAKG
EVPDGYNVSRSNTKDFPLRLEAAAPSHTSVYFCASSDSTV
>V1RF-AGCE01061995.1-trbv |(16809, 17122)|2.99385601037|(1.000,1.000,0.994)|1
PLDSAVSQTPKYLVTQMGKKESLKCEQNLGHDTMYWYKQDSKKLLKIMFIYNNKEPILNE
TVPNRFSPESPDKAHLNLHIESLELGDSAVYFCASSQDTALQ
>V2RF-AGCE01061995.1-trbv |(20780, 21093)|2.72988674503|(0.981,0.930,0.874)|1
PMDTGVTQTPKHLVMGMAHNKSLKCEQNLGHNAMYWYKQKAKMPLELMFIYSFQKQTENN
SVSSRFTPECPDSSHLHLHLHALQPEDSALYLCASSQDTALQ
>V3RF-AGCE01061995.1-trbv |(27181, 27477)|2.85123317448|(0.986,0.932,0.950)|1
LGEAGVTQTPRHLIKMRGQQVTLRCSPVSGHNRVFWYQQAPGQGPQFLFNYYNEMQRQKG
NFPDRFSGHQFSNHSSEMNVSALELGDSALYLCASSL
>V4RF-AGCE01061995.1-trbv |(36451, 36748)|2.98432022844|(0.999,1.000,0.986)|1
PVNAGVTQTPKFQVLKTGQSITLQCAQDMNHDRMYWYRQDPGMGLRLIHYSVGEGTTAKG
EVPDGYKVSRSNTKDFPLRLEAAVPSQTSMYFCASSD
>V5RF-AGCE01061996.1-trbv |(2395, 2695)|2.01801415491|(0.948,0.849,0.616)|1
HTGAGVSQSPSNKVTEKGKDVILRCDPISGHNALYWYRQSPGKGLEFLIYFQGKDAPDKS
GLPSDRFFAERAGGSSSTLKIQRTEQNDSAVYLCASSL
>V6RF-AGCE01061997.1-trbv |(5744, 6035)|2.59444579564|(0.932,0.838,0.873)|1
AGVSQSPSHKVTEKGKDVALSCDPISGHTVLYWYRQSPGQGPEFLIYFQGKNIADDSGLS
SDRFSAERPMGSVSTLQIQRTEQADSAVYLCASSL
>V7RF-AGCE01061997.1-trbv |(11316, 11637)|2.04460554239|(0.892,0.740,0.674)|1
QAEVTQSPTHLIQTRGQQVTLRCSPISGHTSVSWYQQASGQGPQFIFEYVDELKRSEGNF
PGRFSGYQFSDYHSEMNISTLELEDSALYLCASSLAQPCRVTATL
>V8RF-AGCE01061997.1-trbv |(14025, 14315)|2.16159998866|(0.935,0.640,0.889)|1
DSGVTQTPKHLLTAIGQQVTLRCSPRSGDLSVYWYRQSLDQSLQFLIQYYNKNEGEKGNI
PERFSGNQFPNMSSELNLSSLELGDSALYFCASSI
>V9RF-AGCE01061998.1-trbv |(1696, 1993)|2.98774003277|(0.999,0.991,0.998)|1
HGDAEITQSPRHKGTETGRQVTLKCHQTWNHNYMYWYRQDLGHGLRLIHYSYGVQDINKG
EVSDGYVASRSNLEDFPLTLESALSSQTSVYFCASSD
>V10RF-AGCE01062000.1-trbv |(935, 1235)|2.88596034001|(0.955,0.963,0.969)|1
QTDAGVIQSPRHKVTQMGQSVTLRCEPISGHNDLLWYRQTLVQTLELLSYFRSQTRVDDS
EMPQDRFSAEMPNASFSSLRIQPTEPRDSALYLCASTF
>V11RF-AGCE01062000.1-trbv |(15550, 15847)|2.98789600501|(0.998,0.993,0.997)|1
HGDAEITQSPRHKVTKTRRQVTLKCHQTWNHNYMYWYRQDLGHGLRLIHYSVAADNTEKG
EVSHGYVVSRSNTEDFPLTLESATHSQTSVYFCASSD
>V12RF-AGCE01062000.1-trbv |(27286, 27586)|2.76862388095|(0.911,0.937,0.924)|1
CTDTGIIQSPKHEVTEMGQAVTLRCEPILGHNLLFWYRQTLVQGLELLSYFRGRSIIDDE
QMPKDRFSAERPDGSFSTLRIQPAEQGDSAVYICASRL
>V13RF-AGCE01062002.1-trbv |(433, 734)|2.94412737936|(0.994,0.991,0.963)|1
NAGVTQTPKFQVLKKGQSMTLQCAQDVNYDCMYWYRQDPGMGLRLIYYSVDEGITDKGEV
HHGYNVSRSNREDFPLRLEAAALFQTSVYFCAISASTV
>V14RF-AGCE01062002.1-trbv |(6169, 6469)|1.86934408002|(0.967,0.800,0.609)|1
HTGAGVSQSPRYKVTKRGLDIAFRCDPISGHEMLYWYRGTLGQSPEYLTYFQYEVQQDKS
GLPSDRFSAERTGGSFSTLKIQRTEQEDSAVYLCASSS
>V15RF-AGCE01062004.1-trbv |(4599, 4895)|2.96912824764|(0.992,0.999,0.979)|1
PVEAGVTQNPTHLIKTRGQQVTLRCSPISGHTSVSWYQQALGQGPEFILEYYEKKERNRG
NFPHRFSGHQFRDYSSDLNVSNLERGDSALYLCASSL
>V16RF-AGCE01062006.1-trbv |(795, 1091)|2.96912824764|(0.992,0.999,0.979)|1
PVEAGVTQNPTHLIKTRGQQVTLRCSPISGHTSVSWYQQALGQGPEFILEYYEKKERNRG
NFPHRFSGHQFRDYSSDLNVSNLERGDSALYLCASSL
>V17RF-AGCE01062008.1-trbv |(590, 890)|2.99293600205|(0.999,0.999,0.995)|1
HAGAGVSQDPRHKVTKTGQNVTFRCDPISGHNSLYWYRQTLGQSPEFLTYFQNEVQLDKS
GLPSDRFFAERTKGSFSTLKIQRTEQGDSAMYLCASSL
>V18RF-AGCE01062008.1-trbv |(6797, 7094)|2.9829000027|(0.994,0.991,0.998)|1
SVAAGVIQYPRHLIKEKRKTAILKCYPIPGHDTVYWYQQGPGQGLQFLISYYEKTQRDKG
SIPDRFTAQQFSDYHSELNMSSLELGDSALYLCASSL
>V19RF-AGCE01062009.1-trbv |(1447, 1744)|2.98989600501|(0.998,0.999,0.993)|1
HMDGRITQSPRHKVTETGTPVALRCHQTENHRYMYWYRQDLGHGLRLIYYSYGVKDISKG
EVPDGYNVSRSNTEDFPLTLESTTGSQTSVYFCASSD
>V20RF-AGCE01062009.1-trbv |(16503, 16803)|2.9929000027|(1.000,0.997,0.996)|1
HTDAGVIQSPQHKMTEMGQEVTLRCEPISGHTQLFWYRQTVMRGLELLTYFNNENLIDDS
GMPKDRFSAQMPNASFSTLKIQPSEPGDSAVYFCASSL
>V21RF-AGCE01062009.1-trbv |(38765, 39065)|2.98392000218|(0.994,0.998,0.992)|1
HTAAGVTQFPSHRVIEKGQAVTLRCDPISGHEYLYWYRRVMGKEIKFLIYFLRDSKQDES
GMPNHRFSAERTGGTNSTLKVQSAELEDSGIYFCASSL
>V22RF-AGCE01062009.1-trbv |(43861, 44158)|1.74964608285|(0.876,0.692,0.589)|1
HGDAMVIQNPRYQVTQSGKPVTLSCSQNLKHNAMYWYQQKPSQAPKLLLYYYDKDLNTEA
DTPDNFQSRRPNTSFCFLDIRSSGLGDAATYLCASSR
>V23RF-AGCE01062009.1-trbv |(48813, 49110)|1.91156086424|(0.898,0.548,0.859)|1
SPGEEVTQTPRHLVKAKGQKAILYCIPIIGHDYVFWYQQVRKEFKFLISFQNENIFDETG
MPKKRFSAKCTQNSPCSLEIQATEMQDSAVYLCASSQ
>V24RF-AGCE01062011.1-trbv |(9642, 9942)|2.84830455465|(0.955,0.928,0.969)|1
LSNAGVTQNPRHLVRRKGQEARLRCSPVKGHNHVYWYQQLLGEGLKFMIYLQRESTIDES
GMPKEQFSAEFPKEGPSVLRIQQAERGDSAAYFCASSV
>V25RF-AGCE01062012.1-trbv |(4859, 5168)|1.55650240304|(0.490,0.518,0.656)|1
GSGLGAVVSQHPSRVICKSGTSVKIECRALDFQATTMFWYRQSQKEGLMLMATSNEGSKA
TYEQGFSEDHFPISHPDLTSSSLTVASAQPEDSSFYLCSGR
>V26RF-AGCE01062012.1-trbv |(11525, 11825)|2.76693810876|(0.967,0.911,0.913)|1
SLDTKVTQRPRHVVTAKEQKAKMDCVPIKGHGYVYWYHKKLEEELKFLFYLQNGEIIQKA
EEINERFSAQCPENSPCALEIQSTESGDAGLYFCASSK
>V27RF-AGCE01062014.1-trbv |(10290, 10587)|1.89191697509|(0.646,0.946,0.608)|1
FMEADLYQTPRHCVIGTGKKITLECSQTMGHDRMYWYQQDPGMELKLIHYSHGVNSTEKG
DLSSESTVSRIRKENFLPTLESASPSSTSQYLCTSSE
>V28RF-AGCE01062014.1-trbv |(50744, 51041)|2.31166022134|(0.909,1.000,0.658)|1
PLEAQVTQNPRYLITVTGKKLTVTCSQNMNHEYMSWYRQDPGLGLRQIYYSNNVDLVDKG
DVPEGYNVSRKEKRNFPLILERPRPNQTSLYLCASSL
>V29RF-AGCE01062014.1-trbv |(56057, 56354)|2.86040247224|(0.965,0.935,0.964)|1
LVEVKVTQNPRYLVKRVGEKVFLECAQDMDHGRMFWYRQDPGLGLRLIYFSYDIKTDEEG
DVPDGYSVSREKKEQFSLILGSARTNQTSVYLCASSS
>V30RF-AGCE01062014.1-trbv |(68614, 68929)|1.84457726394|(0.582,0.623,0.705)|1
SVFGAVVSQKPSRGVCQRGTSMTIQCHVDSQVTLMFWYRQLPGQSMTLIATANQGSDATY
EKGFAKDKFPISRPNLVFSTLNVSNVSPEDSGVYFCSAGDTVL
>V31RF-AGCE01134597.1-igkv |(30724, 31039)|2.96807224753|(1.000,0.973,0.998)|1
STGDIVMTQTPLSLPVTLGEPASISCRSSQSLLHSNGYTYLNWYLQKPGQSPQLLIYRVS
NRASGVPDRFSGSGSGTDFTLKISRVEAEDVGVYYCMQATQTP
>V32RF-AGCE01134598.1-igkv |(8615, 8915)|2.83394020741|(0.952,0.981,0.911)|1
ARCDIQMTQSPSFLSASAGDRVTITCQVSQGISNELPWYQQKPGKAPTLLIFAATRLQSG
IPSQFSGPGSGTDFTLNISSLQPDDFATYYCQQDYSYP
>V33RF-AGCE01134599.1-igkv |(6643, 6943)|2.97488623715|(1.000,0.977,1.000)|1
ARCDIQMTQSPSSLSASVGDRVTITCRASRSISTELDWYQQKPGKAPVLLIYAASSLQTG
VPSRFSGSGSGTDFTLTISSLQPEDVATYYCQQDYSYP
>V34RF-AGCE01134600.1-igkv |(5149, 5453)|2.82276675902|(0.992,0.881,0.998)|1
SSGDIVMTQSPLFLPVTPGKPASISCRSSQSLLYSDGNTYLNWFLQKPGQPPRRLIYKVS
TRDSGVPDRFSGSGSGTDFTLKISQVEAEDVGVYYCMQA
>V35RF-AGCE01134600.1-igkv |(15938, 16236)|2.97770483945|(0.999,0.981,0.999)|1
DIVMTQTPLSLSVTPGKPASIVCRSSQSLFDSEDGNTYLNWYLQKPGQSPQLLIYDASTH
ASGVPDRFSGSGSGTDFTLKISRVEAEDVGVYYCMQA
>V36RF-AGCE01134600.1-igkv |(26942, 27257)|3.0|(1.000,1.000,1.000)|1
SSGDIVMTQTPLSLPVTPGEPASISCRSSQSLLHSDGYTYLDWYLQKPGQSPQLLIYTVS
NRASGVPDRFSGSGSGTDFTLKISRVEAEDVGVYYCMQATQAP
>V37RF-AGCE01134600.1-igkv |(34924, 35224)|2.99899600001|(1.000,0.999,1.000)|1
TRCDIQMTQSPSSLSASVGDKVTITCQASQGINSWLAWYQQKPGKAPRLLIYAASSLQTG
IPSRFSGSGSGTHYTLTISSLQPDDFATYYCQQTYSTP
>V38RF-AGCE01134600.1-igkv |(45692, 45992)|2.99899200002|(0.999,1.000,1.000)|1
ARCDIQMTQSPTFLSASVGDRVTITCQASQSIGSALAWYQQKPGKATRLLIYAASSLQSG
VPSRFSGSGSGTDFTLTISSLQPDDFATYYCQQYSSFP
>V39RF-AGCE01134602.1-igkv |(4964, 5279)|2.99698000014|(1.000,0.999,0.998)|1
SSGDIVMTQTPLSLSVTPGEPASISCRSSQSLLHSNGNTYLHWFLQKPGQSPQRLIYRVS
NLASGIPDRFSGSGSGTDFTLKISRVEAEDIGVYYCVQSIQTP
>V40RF-AGCE01134603.1-igkv |(27342, 27657)|2.95245749281|(0.999,0.992,0.966)|1
SSGDTVMTQTPLSLPVTLGEPASISCRSSQSLLHSNGNTYLHWYLQKPGQSPQLLIYKVS
NRASGVSDRFSGSGSGTDFTLKISRVKAEDIGVYYCMQSTWFP
>V41RF-AGCE01134603.1-igkv |(35325, 35640)|2.99599600001|(0.999,0.998,0.999)|1
SSGDIVMTQTPLSLPVTPGEPASISCRSSQSLLYSDGKNYLYWYLQKPGQSPQLLIYLGS
NRASGVPDRFSGSGSGTDFTLKISRVEAEDVGVYYCMQGIELP
>V42RF-AGCE01134604.1-igkv |(11428, 11728)|2.99392000218|(1.000,0.998,0.996)|1
TRCDTQMTQSPSSLSASVGDRVTITCRASQSISNWLAWYQQKPGQVPKLLIYKASTLQSG
VPSRFSGSGSGTDFTLTISSLQPEDVATYYCQKCNSAP
>V43RF-AGCE01134604.1-igkv |(23700, 24015)|2.99899600001|(1.000,1.000,0.999)|1
SSGDIVMTQTPLSLPVTPGEPASISCRSSQSLLHSNGNTYLSWYLQKPGQSPQLLIYKVS
NRASGVPDRFSGSGSGTDFTLKISRVEAEDVGVYYCMQDTKTP
>V44RF-AGCE01134604.1-igkv |(38298, 38611)|2.86944063091|(0.985,0.939,0.957)|1
STGDIVMTQSPLFMPVTLGKPASISCRSSQSLLHSNGNTYLSWFLQKPGQSPRRLIYKVS
TRDSGVPDRFSGSGAGTDFTLKISTVEAEDVGVYYCLQSTRY
>V45RF-AGCE01134608.1-igkv |(4999, 5297)|1.94576805706|(0.995,0.533,0.992)|1
SRGDIVMTQSPAFFSGTPGEKVTITCRASEGISKYLHWYQQKPDQAPKLLIQYASQSISG
VPSRFSGSGSGTDFTLTISSLEVEDAATYYCQQGNKW
>V46RF-AGCE01134609.1-igkv |(1163, 1478)|2.97745211916|(0.995,0.984,0.999)|1
SSGDIVMTQTPLTLPVTLGKPASISCRSSQSLLYSDGKNYLHWYLQKPGQSPQLLIYTAS
NRFSGVPDRFSGSGSGTDFTLKISTVEAEDVGVYYCMQAIKHP
>V47RF-AGCE01134610.1-igkv |(3122, 3422)|2.99899600001|(1.000,0.999,1.000)|1
TRCDIQMTQSPSSLSASVGDKVTITCQASQGISNNLAWYQQKTGKAPRLLINEASSLESG
VPSRFSGSGSGTDFTLTISSLQPEDSATYYCQQHNSYP
>V48RF-AGCE01134612.1-igkv |(802, 1102)|3.0|(1.000,1.000,1.000)|1
ARCDIQMTQSPSSLSASVGDKVTITCQASQGINNYLAWYQQKPGKAPRLLIYYASSLDSG
VPSRFSGSGSGADYTLTISSLQPEDFATYYCQQYNSYP
>V49RF-AGCE01134613.1-igkv |(4841, 5141)|3.0|(1.000,1.000,1.000)|1
ARCDIQMTQSPSSLSASVGDKVTITCQASQGINNYLAWYQQKPGKAPRLLIYYASSLQSG
VPSRFSGSGSGADYTLTISSLQPEDFATYYCQQYSSYP
>V50RF-AGCE01134614.1-igkv |(11222, 11522)|2.99598400013|(0.998,0.998,1.000)|1
ARCDIQMTQSPSSLSASVGDKVTITCQASQGISKWLAWHQQKPGKAPKLLIYEASKLQSG
VPSRFSGSGSGTDFTLTISSLQPEDFATYYCQQYNSNP
>V51RF-AGCE01134616.1-igkv |(2365, 2665)|3.0|(1.000,1.000,1.000)|1
STGQIVMTQSPATLSLSPKETATLSCRASQSVSSYLAWYQQKPGQAPRLLIYGASTRATG
IPDRFSGSGSGTEFTLTISSLEPEDFAVYYCQQYNNRP
>V52RF-AGCE01134616.1-igkv |(22982, 23284)|2.30498850817|(0.989,0.814,0.779)|1
SSGDIVMTQTPLSLPVTRGELASISCRSSQSLLHSNGNTYLWWYLQKPGQSPQPLIYKVS
NRFSGVPERFSGSGSETDFTLKISRVEAEDVGVYYCMQG
>V53RF-AGCE01134616.1-igkv |(27065, 27365)|3.0|(1.000,1.000,1.000)|1
ARCDIQMTQSPSSLSASVGDTVTITCQASQGISKWLAWYQQKPGKAPKLLIYDASKLQSG
VPSRFSGSGSGTDFTLTISSLQPEDFATYYCQQHNSNP
>V54RF-AGCE01134617.1-igkv |(5600, 5900)|2.98174002125|(0.993,1.000,0.989)|1
TSGQIVMTQSPATLSLSPKETATLSCRASQSVSSYLAWYQQKPGQGPRLLIYGASTRATG
IPARFSGSGSGTEFTLTISSLEPEDFAVYYCKQYNNWP
>V55RF-AGCE01134617.1-igkv |(13675, 13988)|1.70094828327|(0.711,0.631,0.520)|1
SSGDIVMTQAPFSPPVTPGEPASISCKSSQSLLHSNGNTHLHWYLQKPGQSTQLLIYTIS
SKFYGVPNRFSGSRSGTGFILKFSKVEAEDVGVYCCEQGLQG
>V56RF-AGCE01134618.1-igkv |(1446, 1749)|1.97004321502|(0.936,0.544,0.950)|1
SNGEIVLTQSPTSMAVSQGERVTISCMASSSVSTSYLHWYQQKPGSPPRLLVYSTSSLAS
GVPARFSGSGSGTSYTLTISSMEADDAASYYCQQGDSFP
>V57RF-AGCE01147749.1-ighv |(15994, 16303)|3.0|(1.000,1.000,1.000)|1
VHSQVQLVQSGAEVKKPGASMKVSCKASGYTFTDYYMNWVRQAPGKGLEWMGDIDPENGE
TSYAQKFQGRVTMTADTSTSTAYMELRSLRSEDTAVYYCAR
>V58RF-AGCE01147750.1-ighv |(13331, 13640)|2.98574002125|(0.999,0.995,0.992)|1
VQCEVQLVESGGGLVQSGWSLRLSCVASGSTFSDYYMHWVCQAPGKGLEWIGQINPNGRS
TYFTDFVKGRFTISRDNAKNSLYLQMNNLKTEDTAVYYCAG
>V59RF-AGCE01147864.1-ighv |(2102, 2409)|2.78964300365|(0.995,0.997,0.864)|1
VCAEVQLVQSGAEVKRPGESLKISCKASGYSFNSYWISWVRQMPGKGLEWMGIIYPGNSD
TRYSPSFQGHVTISADKSTSTAYLQWSSLKASDAAMYYCA
>V60RF-AGCE01147864.1-ighv |(20911, 21220)|3.0|(1.000,1.000,1.000)|1
VQCEVQLVESGGGLVQPGGSLRLSCAASGFTFSSYWMSWVRQAPGKGLEWVSAINTDGSS
TYYADAVKGRFTISRDNAKNSLYLQMNSLRAADTAVYYCAR
>V61RF-AGCE01147865.1-ighv |(13024, 13338)|2.06514652489|(0.823,0.930,0.575)|1
VLSQVTLKESGPAQVKPTQTLTLTCTFSGFSLSTYGMGVSWIRQPPGKALEWLATIYWDD
DKYYSPSLKSRLTISKDTSKNHVVLTMTNMDPVDAATYYCARE
>V62RF-AGCE01147865.1-ighv |(20279, 20594)|2.91773760715|(0.998,0.999,0.936)|1
VQCEVQLVESGGGLVQPGGSLRLSCAASVFTFSDYHMSWVRQAPGKGLEWVGLIRNKANG
GTAEYAESVKDRFTISRDDSENSLYLQMSSLKPEDTAVYYCTR
>V63RF-AGCE01147866.1-ighv |(3708, 4017)|2.95194507279|(0.974,0.989,0.991)|1
AHSQGQLVQSGAEVKKPGASVKVSCKASGYSFTSYVISWVRQNPRQGLEWMGGIYPGNGG
TNYAQKFQGRVTMTTDKSTSTAYMELSSLRSEDMAMYYCAG
>V64RF-AGCE01147870.1-ighv |(6257, 6566)|2.88733243834|(0.930,1.000,0.992)|1
VQCEVQLVESGGGLVQPGGSLRLSCAASGFTFSNYWMSWVRQAPGKGLEWVSYIRYDGGS
TSYADSVKGRFTISRDNAKNSLFLQMNSLRAEDTAMCYCAG
>V65RF-AGCE01147870.1-ighv |(13126, 13438)|2.89533253614|(0.964,0.939,1.000)|1
VQCDVQLAESGGGLVQPGGSLRLSCAASRFTFSSYDMDWVCQAPGKGLQWVSAVSAGGSN
TYYADSVKGRFTISRDNGKKFLYLQMNSLRAEDTAVYYCAKK
>V66RF-AGCE01147874.1-ighv |(2400, 2706)|2.99796800026|(0.998,1.000,1.000)|1
VQCEVQLVESGGGLAKPGGSLRLSCAASGFTFSSYAMSWVRQAPGKALEWVSAIGTGGST
YYADAVKGRFTISRDNAKNSLFLQMNSLRAEDTAVYYCAR
>V67RF-AGCE01147875.1-ighv |(4611, 4920)|2.89878370744|(0.936,0.999,0.992)|1
VQCEVQLVESGGGLVQPRGSLRLSCAASGFTFSSYAMSWVRQAPGKGLEWVSAISTDGSG
TSYADSVKGRFTISRDNAKNSLYLQMNSLRAEDTAVYHCER
>V68RF-AGCE01147944.1-ighv |(862, 1171)|3.0|(1.000,1.000,1.000)|1
VQCEVQLVESGGGLAKPGGSLRLSCAASGFTFSSYYMDWVRQAPGKALEWVSAISTDGSG
TSYADSVKGRFTISRDNAKNSLYLQMSSLRAEDTAVYYCAT
>V69RF-AGCE01147945.1-ighv |(15994, 16303)|2.35272065827|(0.992,0.694,0.968)|1
VHSQVQLVQSGAEVKKPGAPVKVSCKTSGYTFTDYYMHWVRQAPEQGLEWMGRIYPGSGN
TNYAQKFQGRVTMTRDTSTSTAYMELSSLRSEDTAVYYCAR
>V70RF-AGCE01148055.1-ighv |(1634, 1941)|2.20013471881|(0.714,0.708,0.837)|1
VHSQVQMVQSGPELKQPGPSVRVSCKASGYTFNSYAINWVGQVPGQGLEGMGWINTYTGK
PTYAQGFTGRFVFSMDTSISTAYLQISSLKAEDTAVYYCV
>V71RF-AGCE01148057.1-ighv |(4263, 4572)|3.0|(1.000,1.000,1.000)|1
VQCEVQLVESGGGLAKPGGSLRLSCAASGFVFSSYHMHWVRQAPGKGLEWVSFISSDGGS
TYYADSVKGRFTISRDNAKNSLYLQMSSLRAEDTAVYYCAR
>V72RF-AGCE01148067.1-ighv |(2196, 2505)|2.99798400013|(1.000,1.000,0.998)|1
VQSQVQLVQSGAEVKKPGASVKVSCKASGYTFTSYYMNWVRQAPGQGLEWMGWINPYNGN
TGYAQKFQGRVTMTVDKSTSTAYMELSSLRSEDTAVYYCAK
>V73RF-AGCE01148231.1-ighv |(5899, 6208)|2.57796848133|(0.928,0.952,0.782)|1
VCAEVQLMQSGAEVKRPGESLKISCKASGYSFNSYWIGWVRQMPGKGLEWMGMIYPGDSD
TRYSPSFQGHITISADKSTSTAYLQWSSLKASDAAMYYCAR
>V74RF-AGCE01026519.1-trav |(24104, 24394)|2.68992114669|(0.896,0.914,0.882)|-1
GTNSNSVKQTDQVIISEGASVTMNCTYTAMGYPTLFWYVQYPNKPLQFLQEETMENSKNF
GARNIKDKNSPIAKHSVQVSDSAMYYCLLRDTVLR
>V75RF-AGCE01026519.1-trav |(29879, 30165)|1.72997524951|(0.537,0.681,0.730)|-1
VSAANNEVQQSPQDLTVQEGEFITINCSYSVGLTSLQWLQQHPGGGIVSLFTLSSEKKKN
GRLTATINLQEKHSSLHITASQPRDSAIYICAV
>V76RF-AGCE01026520.1-trav |(23771, 24058)|1.85705069023|(0.595,0.774,0.871)|-1
ISSQELEQSPQSWIIQEGENLTINCRSSKTLYALYWYKKKYGEGLIFLMMLQKGGEEKSH
EKITAKLDEKKQQSSLHITASQPSHTGIYLCGAD
>V77RF-AGCE01026520.1-trdv |(67373, 67673)|2.98020030738|(0.999,0.997,0.985)|-1
SSMAQTVTQSQPEMSVQEAETVTLNCTYDTSNSNYYLFWYKQPPSRQMILIIRQEGFKQQ
NATENRFSVNFQKAAKSFSLKISDSQLGDTAMYFCAYR
>V78RF-AGCE01026520.1-trdv |(76513, 76813)|2.97658408012|(0.995,0.985,0.997)|-1
FSIAQRVTQSESEMSVQEAETVTLNCTYDSSDSDYYLFWYKQPPSRHMILIIRQEAYKQQ
NATENRFSVNFQKAAKSFSLKISDSQLGDTAMYFCAYR
>V79RF-AGCE01026521.1-trav |(22968, 23292)|1.90706863418|(0.777,0.937,0.521)|-1
VNSQQKNDNQQVKQNTPFLSVQEGELSILNCDYTNNMFDYFLWYKKYPAEGPAILMSISS
VTNQNIDGRFTVFLNKSAKHLSLHIAASQPGDSAVYLCAANAQCSP
>V80RF-AGCE01026522.1-trav |(3924, 4211)|2.86841765962|(0.979,0.988,0.917)|-1
LSGEDQVTQSPEALRLQEGDSSSLNCSYTVGNFGGLLWYRQDPGKGPEFLFILYSAGEEK
QKERLKATLTKKESFLRITAPKPEDSATYLCAVQ
>V81RF-AGCE01026522.1-trav |(15303, 15602)|2.9813881665|(0.997,0.985,1.000)|-1
VSSKQEVTQIPAALSVPEGESLVFNCSFTDSAIYYLQWFRQDPGKGLTSLLLIQSSQREQ
TSGRLNASLDKSSRYSTLHIAASQPGDSATYLCAVRHS
>V82RF-AGCE01026522.1-trav |(67327, 67617)|2.86485601037|(0.957,0.957,0.951)|-1
TIIDAKTTQPTSMDCAEGRAANLPCNHSTISGNEYIHWYRQSYSQEPQYVIHGLKNNETN
EMASLIIAEDRKSSILILPHATLRDTAVYYCIVRV
>V83RF-AGCE01026522.1-trav |(73912, 74209)|2.06973512519|(0.848,0.583,0.891)|-1
GTRAQSVTQLDGHITVSEGAPLKLRCNYSYSTTPYLFWYVQYPSQSLQLLLKDLTGATQV
KGIKGFEAEFRKSETSFHLRKPSAHVSDTAVYFCAAS
>V84RF-AGCE01026527.1-trav |(1820, 2116)|2.98292000218|(0.995,0.997,0.991)|-1
VNSQQGEEEPQTLSIQEGENAIINCSYKTSITSLQWYRQDSNRGLTQLILIRSNEREKHS
GRLRFMLDTSMKSSSLFIAAAQAADTAAYFCATEAQC
>V85RF-AGCE01026527.1-trav |(7054, 7345)|2.98698000014|(0.996,0.997,0.994)|-1
RTYGDSVTQTEGPVTLPEGAALTLNCTYQSSYSVFLFWYVQYLDKEPQLLLKSSENQETD
SRGFQASHVKSDSSFRLEKPSVQLSDSAVYYCALR
>V86RF-AGCE01026527.1-trdv |(10273, 10576)|2.99498000014|(0.998,1.000,0.997)|-1
SSMAQKVTQAQTEISVVEKEDVTLDCVYETSDTTYYLYWYKQPSAREMIFLIRQNSFNEQ
NEISGRYSGNFQKSTSSFSLTIAASQVIDSAVYFCALSE
>V87RF-AGCE01026529.1-trav |(3178, 3469)|2.97057605748|(0.989,0.984,0.998)|-1
VWSQQKEVEQNPGSLSVPEGAIASLSCTYSNRAFQYFMWYRQYSRKGPELLTFIYSSDKK
EDGRFTAQLNKSSQYISLFIRDSQPSDSATYLCAM
>V88RF-AGCE01026530.1-trav |(8602, 8899)|2.9858720041|(0.998,0.994,0.994)|-1
DARAQSVTQPDIHITVSEGASLELRCNYSYGATPYLFWYVQSPGQGLQLLLRYFSGDTLV
QGIKGFEAEFKRSQSSFNLRKPSVHWSDAAEYFCAVS
>V89RF-AGCE01026530.1-trav |(21106, 21396)|2.98879201242|(0.993,0.997,0.999)|-1
VNGENVEQHPSTLSVQVGDSSVINCTYSDSASNYFPWYKQELGKGPRLIIDIRSNVDKRK
DGRMTVLLNKAAKHFSLHITDTQPGDSALYFCAAG
>V90RF-AGCE01026530.1-trav |(40762, 41065)|2.98894800078|(0.998,0.996,0.995)|-1
VWSQQKVEQNSGPLNVPEGVIASLNCTYSDRGSQSFYWYRQYPGKSPELLMSVYSSGNED
GRFTAQLNRASQYVSLLIRDSQLSDSATYLCAVSTRCSP
>V91RF-AGCE01026530.1-trbv |(45429, 45753)|1.5673009395|(0.577,0.645,0.438)|-1
TRAQSVTQLDGQVTVSEGAPVLLKCNYSSSVTVYPFWYVQYPNQGLHFLLKYVSGPTLVK
GIKGFQAEIKKSENSFHLKKSSAHVSDAAEYFCAVSDTVPETAGEL
>V92RF-AGCE01026531.1-trav |(478, 766)|2.99193600205|(0.996,0.996,1.000)|-1
VWSQQKEVEQDPGPFNVPEGTTVAFNCTYSNSASQYFFWYRQDPRKGPKLLMSVYSSGNE
DGRFTAQLNRASQYVSLLIRDSQLSDSATYLCAV
>V93RF-AGCE01026534.1-trav |(4915, 5231)|2.07761699191|(0.933,0.893,0.606)|-1
QSVAQPEDRVTVAEGNPLTVKCTYSVSGTPYLFWYVQYPNQGLQFLLKYITGDNLVKGSC
GFEAEFNKSQTSFHLKKPSALVSDSASYFCAVRDTVMGAAGGA
>V94RF-AGCE01026534.1-trav |(23755, 24045)|2.98986400565|(0.994,0.999,0.997)|-1
MSSGEDVEQSRFLSVQEGDSVVMNCTYTDSSSSYLYWYKQEPGASLQLLAYILSNTDMKQ
DQRLTVQLDKKNKHLSLHVAEAQTGDSAIYFCAES
>V95RF-AGCE01026534.1-trav |(44840, 45134)|2.96252457073|(0.979,0.994,0.991)|-1
GISGDSVVQTEGEVLLSEGDSLTVNCSYESTGYPSLFWYVQYPGKGPELLLKATKGNDKG
SNKDFEAIYRTETTSFHLEKGSVRESDSAVYFCALS
>V96RF-AGCE01026534.1-trav |(47482, 47775)|2.59401444936|(0.823,0.966,0.922)|-1
GSGKNQVEQSPQSLVILEGKNCTLQCNYTVTPFNNLRWYKQNAGKGPITLMFMTFSENTK
SNGRYTATLDANTKQSSLYITASQLSDSASFICVVS
>V97RF-AGCE01112644.1-igkv |(18051, 18347)|2.11369278863|(0.787,0.872,0.606)|-1
SVASYELTQPRSVSVSPGQTASITCSGDKLGDKYAYWYQQKPGQAPVLVIYQDSKRPSGI
PERFSGSNSGNTATLTISGTQAVDEADYYCQVPHSST
>V98RF-AGCE01112648.1-iglv |(492, 795)|3.0|(1.000,1.000,1.000)|-1
FVTSYELTQPHSVSVAPGQTARITCGGNNIGGKYTYWYQQKSGQSPVLVIYRDNNRPSGI
PERFSGSNSGNTATLTISGVQAGDEADYYCQVWDSSSNH
>V99RF-AGCE01112648.1-iglv |(8719, 9022)|2.99185201038|(0.999,0.993,1.000)|-1
SVVSSAMTQEPAVSVALGQTARITCQGGGIGTYSANWYQQKPGQAPVLVIYDNNNRPSGI
PDRFSGSSSGNTASLTITGAQVEDEADYYCGSWDSSGTH
>V100RF-AGCE01112652.1-iglv |(287, 590)|2.91098808836|(0.992,0.935,0.997)|-1
SATSYELTQPHSVSVAPGQTARITCGGNNIGRKNVHWYQQKSGQAPVLVIYNDNNRPSGI
PERFSGSNSGNTATLTISGVQAGDEADYYCQVWDSSTDH
>V101RF-AGCE01112674.1-iglv |(4938, 5247)|2.98574002125|(0.999,0.995,0.992)|-1
SWAQSVLTQPPSASGAPGQRVTISCSGSSSNIGNNYANWYQQLPGKAPKLLIYGNSNRPS
GSPDRFSGSKSDTSATLAITGLQSADEADYYCETWDSSLNA
>V102RF-AGCE01112675.1-iglv |(2837, 3138)|2.08810340622|(0.843,0.903,0.587)|-1
SLSQPVLTQPPSTSASLGASVTLTCTLSSGYSNYAVDWYQQRPDKGPRFVMRVGTSGIVG
SKGDGIPDRFSVSGSGLNRYLTIKNIQEEDESDYYCGS
>V103RF-AGCE01134619.1-igkv |(15805, 16120)|2.24305441328|(0.921,0.747,0.773)|-1
AYGDIVMTQSPDSLAVSLGERVTVNCKSSQSLLYFNNKNYLAWYQQKPGQDPKLLISWAS
SRPAEVPDQFSGSGSGTDFTLTINSLQAEDVGLYYCQQYYSFP
>V104RF-AGCE01134619.1-igkv |(32675, 32987)|2.98974002125|(0.993,0.997,1.000)|-1
TYGDIVMTQSPGSLAVSLGERVTINCKSSQSLLSSSKNYLAWHQQKPGQAPKQIIVWAST
RVSGVPDRYSGSGSGTDFTLTISSLQAEDVAVYYCQQFYSAP
>V105RF-AGCE01134619.1-igkv |(44281, 44572)|2.78148495223|(0.912,0.954,0.923)|-1
NTVLTQSPALLSASLRDTIFMSCSANQSISDYLTWYQQKPGQPPKILVYDADNLYSGVSS
RFSGIQSGTNFILTISSVEADDAATYYCQQDYAIP
>V106RF-AGCE01134619.1-igkv |(59305, 59593)|2.88129965252|(0.970,0.944,0.970)|-1
TTLTQSPTLVSVTPGDKVTISCKASQDIDNDIYWYQQKPGEAPIFIIQEATTLVSGIPPR
FSGSGYGTDFTLTINNIELEDAAYYFCQQDDNFP
>V107RF-AGCE01135277.1-iglv |(31, 340)|2.99698000014|(0.998,1.000,0.999)|-1
CWAQSVLTQPPSVSGNPGQRVTISCSGSSSNIGSSYVNWYQQLPGTAPKLLIYDSNQRPS
GVSDQFSGSTSGNSASLTITGLQSADEADYYCQSYDSNLKA
>V108RF-AGCE01135286.1-iglv |(6543, 6850)|1.93751220751|(0.798,0.833,0.542)|-1
SNSQAVVTQEPSLTVSPGGTVTLTCASSTGTVTSSNYPCWIQQKPGQAPRTLIYNTNSKY
SWTPARFSGSLLGGKAALTLSGAQPEDEAEYYCLLYYSGA
>V109RF-AGCE01147916.1-ighv |(5261, 5570)|2.91293447005|(0.986,0.986,0.947)|-1
AHSQMQLVQSEAEVKKPGASVKVSCKASGYTFTYHYMHWVRQAPGQGLEWMGWIMPYNGN
TNYAQKVEGRVTITRDTSMSTIYMELRSLRSEDTAVYYCAR
>V110RF-AGCE01147919.1-ighv |(4216, 4525)|3.0|(1.000,1.000,1.000)|-1
AHSQVQLVQSGAEVKKPGASVKISCKASGYTFTSYSMHWVQQAPGQGLEWIGYINTNTGG
TNYAQKFQGRVTMTRDTSTSTAYMELSSLKSEDTAVYYCAR
>V111RF-AGCE01147923.1-ighv |(7327, 7634)|3.0|(1.000,1.000,1.000)|-1
VLSQVQLQESGPGLVKPSDTLSLTCAVSGYSISSGYWWSWIRQPPGKALEWIGSIYYSGS
AYYNPSLKSRVTISTDMSKNQFSLRMSSVTAADTAVYYCA
>V112RF-AGCE01147939.1-iglv |(7498, 7807)|2.98380001|(0.998,0.993,0.993)|-1
VDSETVVTQEPSYLVSPGGTVTLTCGLSSGSVSTSHYPSWYQQTPGQAPQMLIYSTNTRP
SGVPDRFSGSILGNKAALTIKGAQADDETDYYCMLYMGSGI
>V113RF-AGCE01148076.1-ighv |(262, 572)|2.92928365264|(0.968,0.994,0.970)|-1
LSKVQVQLQQWGPGLVKPSETLSLTCAVYGYFISSDYWWSWIRQPPGKGLEWIGRISYIG
STYYNPSLKSRVTLSTDTSKSQFSLRLSSVTTADTVVYYCA
>V114RF-AGCE01148081.1-ighv |(431, 740)|2.91939035839|(0.998,0.942,0.992)|-1
VQSQVQLVQSGAEVKKPGASVKVSCKTSGYTFTNYYMYWVRQAPGQGLEWMGWIYPGNGN
TKYAQNFQGRVTMTADKSTSTAYMELSSLRSEDTTVYYCAR
>V115RF-AGCE01148188.1-ighv |(110, 419)|2.99696400065|(1.000,0.997,1.000)|-1
VQCEVQLVESGGGLAKPGGSLRLSCAASGFTFSDYWMGWVRQAPWKGLEWVGEINHNGGS
TYYADSVKGRFTISRDNAKNSLYLQMNSLRAEDTAVYYCAR
>V116RF-AGCE01148199.1-ighv |(2012, 2325)|2.98851611711|(1.000,1.000,0.989)|-1
VQCEVQLVESGGGLAQPGGSLRLSCAASGFTFSNYWMNWVCQAPGKGLEWVGRIKSKADG
GTAEYTASVKGRFTISRDDSKNMLYLQMRSLKTEDTAVYYCA
>V117RF-AGCE01148346.1-iglv |(2421, 2731)|2.10192067236|(0.932,0.688,0.781)|-1
SLSQPVLTQSPSASAALGASVKLTCTLSSGHSNYAIAWHQQQPGKAPRYVMKLTGDGSYN
KGDGIPDRFSGSSSGADRYLTISNLRSEDEADYYCQTWDTG
>V118RF-AGCE01148386.1-ighv |(210, 517)|2.99696400065|(1.000,1.000,0.997)|-1
VQCEVQLVESGGGLVKPGGSLRLSCAASGFTLSEYGMHWVRQAPGKGLEWVSFISYNGGY
IHYADSVKGRFTISRDNAKNSLYLQMSSLRAEDTAVYYCA
>V0RF-ABGA01025787.1-ighv |(2055, 2364)|2.99392000218|(1.000,0.996,0.998)|1
TYSQVQLVQSGHEVKQPGASVKVSCKDSGYSFTTYGMNWVQQAPEQGLEWMGWFNTDTGN
PTYAQGFTGRFVFSMDTSVSTAYLQISSLKAEDTAMYYCAR
>V1RF-ABGA01025787.1-ighv |(23079, 23369)|1.84668636793|(0.637,0.543,0.762)|1
EVKKPGESLRISCKTSGYSFTSYWIHWVRQVPEKELEWIGGIYPGNSDTRYSPSFQGHVT
ISADSSISTTYLQWSSLKASDTAMYYCVRQTIQNL
>V2RF-ABGA01025790.1-ighv |(836, 1151)|2.92790584412|(0.994,0.944,1.000)|1
VQCEVQLVESGGGLVQPGGSLRLSCAASGFTSSDYQMYWVRQASGKGPEWVGYIGSKSNS
YATAYAASVKGRFTISRDDSKNTLYLQMNSLKTEDMAVYYCAR
>V3RF-ABGA01025791.1-ighv |(3901, 4216)|3.0|(1.000,1.000,1.000)|1
VQCEVQLVESGGGLVQPGGSLRLSCAASGFTFSSYWMSWVRQAPGKGLEWVGFIKNKADG
GTTDYAASVKGRFTISRDDSKNTLYLQMNSLKTEDTAIYYCAR
>V4RF-ABGA01025791.1-ighv |(14222, 14536)|2.03381341931|(0.800,0.566,0.942)|1
VLSQVTLKESGPALVKPTQTLTLTCTFSGFSLSTSGIGVGWIRQPLGKAMEWLAHIYWTD
SKYYSSSLKSRLTISKDTSKSQVVLIMTSMDPVDTATYYCARI
>V5RF-ABGA01025797.1-ighv |(8415, 8724)|2.99899600001|(1.000,1.000,0.999)|1
VQCEVQLVESGGGLVQPGGSLRLSCVASGFTFSSYAMRWVHQAPGKGLEWVSAISGSGGS
TWYPDSVKGRFTISRDNAKNTLYLQMNSLRAEDTAVYYCVR
>V6RF-ABGA01025808.1-ighv |(3704, 4019)|3.0|(1.000,1.000,1.000)|1
VQCEVQLVESGGGLVQPGGSLRLSCAASGFTFSSSAMHWVRQAPGKGLEWVGRIRSKANS
YATEYAASVKGRFTISRDDSKNTAYLQMNSLKTEDTALYYCTT
>V7RF-ABGA01025808.1-ighv |(11416, 11731)|3.0|(1.000,1.000,1.000)|1
LQCEVQLVESGGGLVQPGGSLRLSCAASGFTFSDHYMDWVRQAPGKGLEWVARIRNKANS
YTTEYAASVKGRFTISRDDSKNTLYLQMSSLKTEDTAVYYCAR
>V8RF-ABGA01025808.1-ighv |(27673, 27982)|2.99899600001|(1.000,0.999,1.000)|1
VQCEVQLVESGGGLVQPGGSLRLSCAASGFTFRDHYMNWVRQAPGKGLEWVSAISGSSSS
TYYADSVKGRFTISRDNAKNTLYLQMNSLRAEDTAVYYCVR
>V9RF-ABGA01025808.1-ighv |(39511, 39826)|2.99899200002|(0.999,1.000,1.000)|1
VQCEVQLVESGGGLVQPGGSLRLSCAASGFTFSNYYMSWVRQAPGKGLEWEGFIKNKTNG
GTTEYAASVKGRFTISRDDSKSITYLQMSSLKTEDTAVYYCTR
>V10RF-ABGA01025808.1-ighv |(52101, 52413)|2.99493200206|(1.000,0.996,0.999)|1
VQCELQLVESRGDLVQPGGSLRLSCAASGFTFSSYGMNWVCQAPGKGLEWVSVISRSSGT
IHYADSMKGRFTISRDNAKNSLYLQMNNSLRAEDTAVYYCVK
>V11RF-ABGA01025808.1-ighv |(65728, 66037)|2.95074224752|(0.990,0.996,0.967)|1
VQSQVQLVQSGAEVKKPGSSVKISCKVSEDTFSSYAISWVQQAPGQGLEWMGGIIPVLGT
ADYAQKFQGRVTITADTSTSTAYMELSSLRSEDTAVYYCAT
>V12RF-ABGA01025810.1-ighv |(7175, 7481)|3.0|(1.000,1.000,1.000)|1
VQCEVQLVESGGGLVQPGGSLRLSCAASGFTISSYDMHWVHQAPGKGLEWVSAISTGGGT
YYADSVKGRFTISRDNAKNTLYLQMNNLRAEDTAVYYCAK
>V13RF-ABGA01037228.1-ighv |(1414, 1723)|3.0|(1.000,1.000,1.000)|1
VLSQVQLQESGPGLVKPSETLSLTCAVSGGSISSGYYWGWIRQPPGKGLEWIGSIYYSGS
TYYNPSLKSRVTISVDTSKNQFSLKLSSVTAEDTAVYYCAR
>V14RF-ABGA01044302.1-ighv |(5170, 5476)|2.99899600001|(1.000,0.999,1.000)|1
VLSQVQLQESGPGLVKPSETLSLTCAVSGGSISSYYWSWIQQPPGKGLEWIGYIYSSGST
NYNPSLKSRVTMSVDTSKNQFSLKLSSVTAADTAVYYCAR
>V15RF-ABGA01044302.1-ighv |(9977, 10286)|2.99799600001|(0.999,0.999,1.000)|1
AHSQVQLGQSGPQVKKPESSVKVSCKASGYTFTSSAMQWVRQAPGQGLEWIGWIIVGSGN
TNYAQKFQGRVTITRDTSTSTAYMELSSLRSEDTAVYYCAA
>V16RF-ABGA01044304.1-ighv |(6033, 6342)|3.0|(1.000,1.000,1.000)|1
VLSQVQLQESGPGLVKPSETLSLTCAVSGGSISSGYYWGWIRQPPGKGLEWIGSIYYSGS
TYYNPSLKSRVTISVDTSKNQFSLKLSSVTAADTAVYYCAR
>V17RF-ABGA01044305.1-ighv |(3517, 3823)|2.99798400013|(1.000,1.000,0.998)|1
VLSQVQLQESGPGLVKPSETLSLTCAVSGGSISSYYWGWIRQPPGKGLEWIGYIYSSGST
NYNPSLKSRVTMSVDTSKNQFSLKLSSVTAADTAVYYCVR
>V18RF-ABGA01044306.1-ighv |(1052, 1358)|3.0|(1.000,1.000,1.000)|1
VLSQVQLQESGPGLVKPSETLSLTCAVSGGSISSNYWSWIRQPPGKGLEWIGYIYSSGST
YYNPSLKSRVTMSIDTSKNQFSLKLSSVTAADTAVYYCAR
>V19RF-ABGA01044306.1-ighv |(5855, 6164)|2.26472400338|(0.718,0.926,0.884)|1
AHSQVQLVQSGPEVKKPGSSVKVSFKSSGYTFTSSAMQWVQQAPGQGLEWIGWIIVGNGN
TNYAQKFQGRVTITRDMSTSTAYMELSSLRSEDMAEYYSAA
>V20RF-ABGA01044307.1-ighv |(456, 762)|3.0|(1.000,1.000,1.000)|1
VLSQVQLQESGPGLVKPSETLSLTCAVSGGSISSYYWSWIRQPPGKGLEWIGGIYSSGST
YYNPSLKSRVTISVDTSKNQFSLKLSSVTAADTAVYYCAR
>V21RF-ABGA01044310.1-ighv |(2823, 3129)|2.96391237717|(1.000,0.968,1.000)|1
VQCEVQLVESGGGLVQPGGSLRLSCAASGFTVSSSSMIWVRQAPGKGLEWVSYISSDGSA
YYTDSVKGRFTVSRDNSKNTLYLQMNSLRAEDTAVYYCAK
>V22RF-ABGA01044310.1-ighv |(11412, 11713)|1.78898105686|(0.666,0.590,0.583)|1
LVQPGGSLRLSFAASGFTFSSSWMHWVCQAPEKGLERVANIKCDGSEKYYADSVKGRLTI
SRDNAKNSLYLQMNSLRAEDMAVYYCVRDTVRGGQCEP
>V23RF-ABGA01044310.1-ighv |(19040, 19346)|2.95938267424|(0.999,1.000,0.965)|1
CAEVQLVQSGAEVKRPGESLRISCKTSGYSFTSNWISWVRQMPGKGLEWMGSIYPGDSDT
RYSPSFQGHVTISADKSISTAYLQWSSLKASDTAMYYCAK
>V24RF-ABGA01044313.1-ighv |(11041, 11356)|2.99899600001|(1.000,0.999,1.000)|1
VQCEVQLVESGGGLVHPGGSLRLSCTASGFTFGDYAMSWVRQAPGKGLEWVGFIRSKAYG
GTTEYAASVKGRFTISRDDSKSIAYLQMNSLKTEDTAVYYCAR
>V25RF-ABGA01044314.1-ighv |(13359, 13668)|2.83958358676|(0.998,0.889,0.999)|1
VQCEVQLVESGGGLVQPGGSLRLSCAASEFTFSSNDMSWVRQAPEKGLEWVSYISNSGRT
TYYADSVKGRFTISRDNAKNSLYLQMNSLRAEDTAVYYCVR
>V26RF-ABGA01044316.1-ighv |(14128, 14437)|2.64379201242|(0.882,0.876,0.886)|1
AHSQVQLVQSGAEVKRPGASVKVSCKASGYTFTSCYMYWVQQAPGQGLEWMGVINPSDGS
TSYAQKFQGRVTMTRDTSTSTVYMELSSLRSEDTAVYYYAR
>V27RF-ABGA01044319.1-ighv |(4092, 4401)|2.99480001|(0.995,1.000,1.000)|1
VQCEVQLVESEGGLVQPGGSLRLSCAASGFTFDDYAMHWVRQAPGKGLKWVSGINWNGGS
TYYADSVKGRFTISRDNSKNSLYLQMNSLRAEDTALYYCAK
>V28RF-ABGA01058270.1-ighv |(14488, 14797)|2.97970803341|(0.995,0.998,0.987)|1
VLSQVQLQQWGPGLVKPSETLSLTCAVCGGSISSGYYWSWIRQPPGKGLEWIGYMHHSGS
TYYNPSLKSRVTMSVETSKNQFSLKLSSVTAADTAVYYCAR
>V29RF-ABGA01058270.1-ighv |(28194, 28503)|2.98789600501|(0.998,0.997,0.993)|1
VQCEVQLVESGGGLVQSRGSLRFSCAASGFTFSSCGMNWVRQAPGKGLEWVAIIWYDGSN
KYYADSVKGRFTISRDNSKNMLYLQMNSLRVEDMAVYYCAK
>V30RF-ABGA01058270.1-ighv |(38768, 39077)|2.99099200002|(0.997,0.996,0.998)|1
VLSQVRLQESGPGLVKPSETLSLTCAVSVDSISSGYYWSWIRQPPGKGLEWIGYIHHSGS
TYYNPSLKSRVTMSVDTSKNQFSLKLSSVTAADMAVYYCAT
>V31RF-ABGA01058273.1-ighv |(621, 936)|2.99899600001|(1.000,0.999,1.000)|1
VQCDVQLVESGGGLVQPGGSLRLSCAASGFTFSDYYMSWVHQPPGKGLEWVGLIRNKANG
GTTEYAASVKGRFTISRDDSKSIAYLQMNSLKTEDTAVYYCTR
>V32RF-ABGA01091248.1-trbv |(6357, 6654)|2.78135545508|(0.889,0.976,0.976)|1
HMDAGITQSPRHKITETGTPVTLKCHQTENRRYMYWCRQDLGHGLRLIHYSYGVKDTDKG
EVSDGYSVSRSKTEDFLLTLESATRSQTSVYFCAISE
>V33RF-ABGA01091248.1-trbv |(17283, 17574)|2.2816395334|(0.990,0.730,0.862)|1
AGVAQSPRYKIIEKKQPVAFWCNPISGHNTLYWYRQNLGQGPELLIRYENEEAVDDSQLP
KDRFSAERLKGVDSTLKIQPAELGDSAVYLCASSL
>V34RF-ABGA01091248.1-trbv |(29358, 29658)|2.99099200002|(0.997,0.996,0.998)|1
HTDAGVIQSPRHEVTEMGKEVTLRCKPISGHEDLFWYRQTMMQGLELLIYFNNKAVMDDS
GMPKDRFSAKMPNASFSTLKIQPSEPRDSAVYFCASSL
>V35RF-ABGA01091248.1-trbv |(32661, 32961)|2.87011525692|(0.997,0.907,0.998)|1
HTDAGVIQSPRHEVTEMGKEVTLRCKPISGHDYLFWYRQTMMQRLELLIYFNNKAVMDDS
GMPKDRFSAKMPNASFSTLKIQPSEPRDSAVYFCASSL
>V36RF-ABGA01091249.1-trbv |(2283, 2583)|2.60211397144|(0.982,0.999,0.777)|1
LIDAGVTQTPRHKVTEMGQEVTMRCQPILGHNTVFWYRQTMMQGLELLAYFRNQAPLDDS
GMPKDRFSAEMPDATLATLKIQPSEPRDSAVYLCASGL
>V37RF-ABGA01091249.1-trbv |(9220, 9521)|2.3226002007|(0.973,0.947,0.686)|1
AGVTQFPSHSVIEKGQTVTLRCDPISGHDYLYWYRRVMGKEIKFLIYFVRESKQDESSMP
KNRFLAERTGGTYSTLKVQPAELEDSGVYFCASSQVTV
>V38RF-ABGA01091249.1-trbv |(14302, 14599)|2.98132022844|(0.998,0.985,0.999)|1
HGVAMVIQNPRYQVTQFGKPVTLSCSQNLNHNVMYWYQQKSSQAPKLLFHYYDKDFNNEA
DTPDNFQSRRPNTSFCFLDIRSPGLGDAAMYLCATSR
>V39RF-ABGA01091249.1-trbv |(19286, 19586)|2.96855304207|(0.996,0.997,0.977)|1
SPGEEVTQTPKHLVKGEGQEAKLYCAPIKGHSYVFWYQQVLKKEFKFLISFQNENVFDKT
GMPKERFSAKCLPNSPCSLEIQATKLEDSAVYFCASSQ
>V40RF-ABGA01091251.1-trbv |(2217, 2517)|2.1230286095|(0.968,0.848,0.667)|1
LSNAGVTQNPRHLVRRRGQEARLRCSPMKGHSYVYWYRQLPEEGLKFMVYLQKEKIIDES
GMPKERFSAEFPKEGPSILRIQQAVRGDSAAYFCASSP
>V41RF-ABGA01091252.1-trbv |(2503, 2800)|3.0|(1.000,1.000,1.000)|1
TVDGGITQSPKYLFRKEGQNVTLSCEQNLNHDAMYWYRQDPGQGLRLIYYSGIVNDFQKG
DIAEGYSVSREKKESFPLTVTSAQKNPTAFYLCASSI
>V42RF-ABGA01091256.1-trbv |(1883, 2180)|2.18730411376|(0.954,0.847,0.684)|1
SMDTKVTQRPRLLVKANEQKAKMDCVPIKGHSYVYWYRKKPEEELKFLLYFQNEEIQKAE
IINERFSAQYPKNSSCTLEIQSTETGDMALYFCASSK
>V43RF-ABGA01091257.1-trbv |(2769, 3069)|2.98274002125|(0.998,0.991,0.994)|1
SFHARVTQTPGHLVKGKGQKTKMDCTPEKGHTFVYWYQQNQNKEFMLLISFQNKQVLQET
EMHKKRFSSQCPKNTPCSLATLSSEPGDTALYLCASSQ
>V44RF-ABGA01091257.1-trbv |(13504, 13802)|2.90471348836|(0.994,0.997,0.930)|1
SMDADVTQTPRNRITKTGKRIMLECSQTKGHDGMYWYRQDPGLGLRLIYYSFDVKDINKG
EISDGYSVSRRTQAKFSLSLESATPNQTALYFCATSD
>V45RF-ABGA01091260.1-trbv |(5031, 5328)|2.99493200206|(1.000,0.999,0.996)|1
LMEADIYQTPRHLVIGTGKKITLECSQTMGHDKMYWYQQDPGMELHLIHYSYGVNSTEKG
DLSSESTVSRIRMEHFPLTLESARPSHTSQYLCASSE
>V46RF-ABGA01091263.1-trbv |(8280, 8583)|2.9859000027|(0.995,0.999,0.992)|1
SVFSAVVSQKPSRDICQRGTSLTIQCQVDSQVTMMFWYRQQPGQSLTLIATANQGSEATY
ESGFVIDKFPISRPNLTFSTLTVSNMSPEDSGIYLCSVE
>V47RF-ABGA01099934.1-ighv |(8362, 8671)|2.9455717188|(1.000,1.000,0.954)|1
VLSQVQLQESGPGLVKPSETLSLTCAVSGGSISSGYYWGWIRQPPGKGLEWIGHINYGGS
TSYNPSLKSRVTLSVDTSKNQFSLKLSSVTAADTAVYYCAR
>V48RF-ABGA01099934.1-ighv |(21569, 21878)|2.90384066792|(0.963,0.962,0.980)|1
AHSHVQLVQSGDEVRKPGASVKVSCKASGYTFTNHNMDWVRQAPGQGFEWMGGINTNTGG
TSYAQTFQGRVIMTRDTSTNTAFMELSSLRSEDMTVYYCAR
>V49RF-ABGA01099935.1-ighv |(7135, 7459)|2.39964261538|(0.831,0.888,0.732)|1
AHSQVQLVQSEPEMKQPGASVKFSCKATGYTFTSYVMNWVRQAPGQGLEWVGWINTNTGN
PMYAQGFTGQFVFSMDTSVSTVYLQISSLKAEDMAVYYCLRDTVWK
>V50RF-ABGA01099938.1-ighv |(2861, 3183)|2.7476534596|(0.961,0.852,0.983)|1
VLSQVTLKESGPALVKPTETLTLTCTVSGFSLSNSKMGVSWIRQPPGKALEWLAHIFSND
EKSYSTSLKSRLTISKDTSKSQVVLTMTNMDPVDTATYYCTRRAQ
>V51RF-ABGA01099940.1-ighv |(16077, 16386)|2.99699200002|(0.999,1.000,0.998)|1
AHAEVQLVQSGAEVKKPGASVKFSCKVSGYTFTELSMHWVRQAPGKGLEWMGGFDPDDGE
TIYAQKFQGRVTMTEDTSTDTAYMELSSLRSEDTAMYYCAT
>V52RF-ABGA01099941.1-ighv |(996, 1308)|2.99698000014|(0.998,0.999,1.000)|1
VQCEVQLVESGGGLVQPGGSLRLSCAASGFTFTNYYLHWFRQAPGKGLEWVAYISSGSGG
STNYPDSVKGRFTISRDNAKNTLYLQMNSLRAEDTAVYYCAR
>V53RF-ABGA01099941.1-ighv |(12097, 12412)|2.98851611711|(1.000,1.000,0.989)|1
VQCEVQLVESGGGLVQPGGSLRLSCAASGFTFSNYYMHWVRQAPGKGLEWVGFIRTEAKG
GTTEYAASVKGRFTISRDDSKSIAYLQTNSLKTEDTAVYYCTR
>V54RF-ABGA01099945.1-ighv |(5584, 5899)|2.99493200206|(1.000,0.999,0.996)|1
VQCEVQLVESGGGLVQPGGSLRLSCAASGFTFSNAWLSWVRQAPGKGLEWVGRIKSKADG
GTTDYAAPVKGRFTISRDDSKNTLYLQMNSLKTEDTAVYYCAT
>V55RF-ABGA01099946.1-ighv |(22626, 22932)|3.0|(1.000,1.000,1.000)|1
VQCEVQLVESGGGLVQPGGSLRLSCAASGFTVSSYDMHWVRQAPGKGLEWVSAIDTDGDT
YYADSVKGRFTISRENAKNSLYLQMNSLRAKDTAVYYCAR
>V56RF-ABGA01099946.1-ighv |(36315, 36622)|2.99593600205|(1.000,1.000,0.996)|1
VQCEVQLVESGGGLVQPGRSLRLSCAASGITFSNQYMSWVRQATGKGLEWVSYISGDSSY
TSYADSVKGRFTISRDNAKNSLYLQMNSLRVEDTAVYYCV
>V57RF-ABGA01099947.1-ighv |(19776, 20085)|3.0|(1.000,1.000,1.000)|1
VQCEVQLVESGGGLVQPGGSLRLSCAASGFTFSSYSMSWVRQAPGKGLEWVSAISGSGSS
TYYPDSVKGRFTISRDNAKNTLYLQMNSLRAEDMAVYYCVR
>V58RF-ABGA01099948.1-ighv |(6262, 6577)|2.99696400065|(1.000,1.000,0.997)|1
VQCEVQLVESGGGLVQPGGSLRLSCAASGFTFSNYYMHWVRQAPGKGLEWVGFIASKAYG
GTTEYAASVKGRFTISRDDSKSIVYLQMNSLKTEGTAVYYCTR
>V59RF-ABGA01099955.1-ighv |(3483, 3787)|2.93321476928|(0.983,0.994,0.959)|1
CAEVQLVQSGAEVKRPGESLRISCKGSGYSFTSYWISWVRQMPGKGLELMGIIDPSDSDT
RYSPSFQGHITISADKSISTAYLQWTSLKASDTAMYYCA
>V60RF-ABGA01099956.1-ighv |(15185, 15494)|3.0|(1.000,1.000,1.000)|1
VQCEVQLVESGGGLVQPGGSLRLSCAASGFTFSSYAMYWVRQAPGKGLEWVSAINSGGGS
TYYADSVKGRFTISRENAKNTLYLQMSSLRAEDTAVYYCAK
>V61RF-ABGA01104800.1-ighv |(1132, 1438)|2.99798400013|(1.000,1.000,0.998)|1
VLSQVQLQESGPGLVKPSETLSLTCAVSGGSISGYSWSWIRQPPGKGLEWIGSIHSSGST
YYNPSLKSRVTISADTSKNQFSLKLSSVTAADTAVYYCAR
>V62RF-ABGA01104801.1-ighv |(6863, 7169)|2.97840127932|(1.000,1.000,0.980)|1
VLSQVQLQESGPGLVKPSETLSLTCAVSGGSISSYYWSWIRQPPGKGLEWIGYIHSSGST
NSNPSLKSRVTMSVDTSKNQFSLKLSSVTAADTAVYYCAR
>V63RF-ABGA01129113.1-trbv |(1435, 1735)|2.97661205453|(0.994,0.998,0.985)|1
HTGAGVSQSPRYKVAKRGQDVALRCDSIFGHVTFYWYQQTLGQGPEVLTYFRSDAQRDKS
GLPSGRFSAERPEGSVSTMKIQHTEQGDSAVYLCASSL
>V64RF-ABGA01154382.1-igkv |(15548, 15866)|2.95606187285|(0.993,0.971,0.994)|1
AYGDIVMTQSPDSLAVSLGERITINCKSSQSVLYSSNNKNYLAWYQQKPGQAPKLLIYWA
STRQSGVPDRFSGSGSGTDFTFTISSLQAEDVAVYYCQQSYSAP
>V65RF-ABGA01154383.1-igkv |(2962, 3250)|2.89547595102|(0.988,0.971,0.945)|1
TTLTQSPAFVSATPGDKVTISCKASQDIDDDMNWYQQKPGEAAIFIIQEATTLISGIPPR
FSGSGYGTDFTLTINNIESEDAAYYFCLQHDNFP
>V66RF-ABGA01154588.1-trav |(5719, 6028)|2.04106294477|(0.878,0.914,0.570)|1
TIMYLVIGTAGQSLEQPSEVTAVEGAIVQINCTYQTSGFYGLSWYQQHDGGAPTFLSYST
LDGLEERGHFSSFLSRSDSYGYLLLQELQMKDSASYFCAVR
>V67RF-ABGA01174988.1-ighv |(27125, 27434)|3.0|(1.000,1.000,1.000)|1
VQCEVQLVESGGGLVQSRGSLRLSCAASGFTFSSCGMNWVRQAPGKGLEWVAVIWYDGSN
KYYADSVKGRFTISRDNSKNMLYLQMNSLRVEDTAVYYCAK
>V68RF-ABGA01174994.1-ighv |(8215, 8524)|2.91407249552|(0.994,0.999,0.935)|1
AQSQVQLVQSGAEVKKPGASVKVSCKASGYTFTNYYMQWVQQAPGQGLEWMREFNTRNGN
TQYIQEFQGRVTITRDTSTSTAYMELSSLRSEDTAVYYCVR
>V69RF-ABGA01174994.1-ighv |(20953, 21275)|2.1087596692|(0.903,0.586,0.967)|1
VLSQVTLKESGPALVKPTETLMLTCTVSGLSLSTSGMGMSWIRQPPGKALEWPAHIFLND
KNSYSTSLKNRLTISKDTSKSQVVVTMTNMDPVDTATYYCAWRAQ
>V70RF-ABGA01174995.1-ighv |(11362, 11671)|2.87575424817|(0.996,0.923,0.979)|1
AHAKVQLVQSGAEVKKPGASVKVSCKVSGYTLTRLSMHWVRQAPRKGLEWMGGFYPVDGE
TIYAQKFQGRVTMTEDTSTDTAYMEISSLRSEDTAVYYCAT
>V71RF-ABGA01174999.1-ighv |(1443, 1758)|3.0|(1.000,1.000,1.000)|1
VQCEVQLVESGGGLVQPGGSLRLSCAASGFTFSDYYMSWVHQPPGKGLEWVGLIRNKANG
GTTEYAASVKGRFTISRDDSKSIAYLQMNSLKTEDTAVYYCTR
>V72RF-ABGA01174999.1-ighv |(24157, 24466)|2.91246510429|(0.981,0.998,0.941)|1
VQCEVQLVESGGGLVQAGESLRLSCAASGFTFSSYRMNWVRQAPGKGLEWVSYISSDSSY
IYYADSVKVRFTISGDNAKNSMYLQMNNLRAKDTPVYYCVK
>V73RF-ABGA01194059.1-ighv |(3549, 3864)|3.0|(1.000,1.000,1.000)|1
VQCEVQLVESGGGLVQPGGSLRLSCAASGFTFSNHYMQWVRQAPGKGLEWVGLIRNKADG
ETTDYAASVKGRVTISRDDSKSITYLQMSSLKTEDSAVYYCAR
>V74RF-ABGA01194064.1-ighv |(10045, 10354)|2.9889000027|(0.996,1.000,0.993)|1
VLSQVQLQESGPGLVKPLETLSLTCAVSGGSISSSNWWSWVRQPPGKGLEWIGEIYQSGS
TNYNPSLKSRVTISVDKSKNQFSLKLSSVTAADTAVYYCAR
>V75RF-ABGA01197604.1-igkv |(7602, 7920)|2.97523355494|(0.999,0.978,1.000)|1
SSGDIVMTQTPLSLPVTPGEPASISCRSSESLLDTDDEYTYLNWYLQKPGQSPQLLIYEV
SSQASGVPDRFSGSGSGTDFTLKISRVEAEDVGVYYCMQALQTP
>V76RF-ABGA01198108.1-igkv |(6191, 6491)|2.99499200002|(0.999,0.998,0.998)|1
ARCDIQMTQSPTSLSASIGDSVTSTCQASQSISNELAWYQQKPGKVPKLLIYRVSSLQMG
IPSRFSGSGSGTDFTLTITSLQPDDVATYYCQQEYSYP
>V77RF-ABGA01224584.1-trbv |(1799, 2096)|2.90435005376|(1.000,0.991,0.932)|1
LVDMKVTQSSRYLVKRMGEKVFLECVQDMDHERMFWYRQDPGLGLRLIYFSYDVKMKEQG
DVPEGYSVSREKKGHFSLILESASTNQTSMYLCASSL
>V78RF-ABGA01243343.1-ighv |(9466, 9772)|2.90341922997|(0.982,0.935,0.996)|1
VLSQVQLQQWGAGLVKPSETLSLTCAVYGGSFSDYGWNWIRQPPGKGLEWIGYIVSSGRT
NYNPSLKSRVTMSVDTSKNQFSLKLSSVTAADTAVYYCAR
>V79RF-ABGA01243345.1-ighv |(15320, 15629)|2.99899600001|(1.000,1.000,0.999)|1
VQCEVQLVESGGGLVQPGGSLRLSCAASGFTFSSYGMHWVRQAPGKGLEWVAVIWYDGSN
KYYADSVKGRFTISRDNSKNTLYLQMNSLRVEDTAVYYCAK
>V80RF-ABGA01270863.1-ighv |(174, 468)|1.92058737246|(0.881,0.513,0.999)|1
GGVGGGLVQPGGSLRLSCAASGFTFSNHYMQWVRQAPGKGLEWVGLIRNKADGETTDYAA
SVKGRVTISRDDSKSITYLQMSSLKTEDSAVYYCAR
>V81RF-ABGA01276890.1-trbv |(7515, 7815)|2.86726125864|(0.984,0.999,0.908)|1
LTEAGVAQSPRYKIIEKRQSVAFWCNPISGHATLYWYQQILGQGPKLLIQFQNDGVVDDS
QLPKDRFSAERLKGVDSTLKIQPANLGDSAVYLCASSL
>V82RF-ABGA01280669.1-iglv |(7470, 7780)|1.78547645375|(0.939,0.563,0.795)|1
SLSQPVQTQPSSHSACSGASARLTCTLSSGFSVGDFWISWYQQKPGNPPRYLLYYHSDSD
KGQGSGVPSRFSGSNDASANAGILRISGLQPKDEADYYCGT
>V83RF-ABGA01285645.1-igkv |(2124, 2410)|2.87447761162|(0.997,0.912,0.994)|1
IVMMQSPATLSVSPGERGTISCRASQSVSNYLAWYQQKPGQSPRLLIYRASNRATGIPAR
FSGSGSGTDFTLTISSVELEDFAVYYCQQYNAG
>V84RF-ABGA01285648.1-igkv |(32619, 32919)|3.0|(1.000,1.000,1.000)|1
ARCDIQMTQSPSSVSASVGDRVTITCRASQGISSALAWYQQKPGKPAKLLIYAASSLQSG
VPSRFSGSGSGTDYTLTISSLQPEDFATYYCQQYNSVP
>V85RF-ABGA01285649.1-igkv |(12602, 12902)|2.99496000066|(0.999,1.000,0.996)|1
ARCDIQMTQSPSSLSASVGDRVTITCRASQGISDDLAWHQQKPGKAPKLLIYAASSLQSG
VPSRFSGSESGTEFTLTISSLQPEDFATYYCQQYNSYP
>V86RF-ABGA01285651.1-igkv |(14331, 14619)|2.93942597125|(1.000,0.998,0.951)|1
IVMTQSPATLSLSPGERATISCRASQSVSNYLAWYQQKPGQAPRLLIHSASTRATGIPAR
FSGSGSGTDFTLTISSLEPEDFAVYYCQQGNNLP
>V87RF-ABGA01290070.1-igkv |(266, 566)|2.98967205249|(1.000,0.991,0.999)|1
TTGEVVLTQSPATLSLSPGERATLSCRASQSVSNYLAWYQQKPGQAPRLLIYDASNRATG
IPARFSGSGSGTDFTLTISSLEPEDFAVYYCQQRSNLP
>V88RF-ABGA01290201.1-trgv |(6850, 7160)|2.1840653142|(0.912,0.655,0.860)|1
SQISSNLEGRTKSVTGPTGSSAEITCDLPGASTLYIHWYLYQEGKAPQRLLYYEPYYFRV
VLESGITPGKYDTGSTRSSWNLRLQNLIENDSGVYYCATWD
>V89RF-ABGA01290201.1-trgv |(11173, 11486)|2.98870803341|(1.000,0.997,0.992)|1
SQKSSNLEGRTKSVTRPTGSSAEITCDLPGESTVYIHWYLHQEGKAPQRLLYYDSYNSRV
VLESGISPGKYDTYGSTRKNLRLILRNLIENDSGVYYCAIWD
>V90RF-ABGA01290201.1-trgv |(15529, 15842)|2.96929565252|(0.999,1.000,0.973)|1
SQKSSNLEGGTKSVTRPTRSSAEITCDLTVTNAFYIHWYLHQEGKAPQRLLYYDVSNSRD
VLESGLGPGKYYTHTPRWWSWILILRNLIENDSGVYYCATWY
>V91RF-ABGA01290202.1-trgv |(2218, 2531)|2.9725031224|(1.000,1.000,0.975)|1
SQKSSNLEGGTKSVTRPTRSSAEITCDLTVTNAFYIHWYLHQEGKAPQRLLYYDVSTARD
VLESGLSPGKYYTHTPRRWSWILRLQNLIENDSGVYYCATWD
>V92RF-ABGA01290204.1-trgv |(7449, 7762)|2.05690420192|(0.909,0.638,0.806)|1
SQKSSNLEGRTKSVTRPTGSLAVITCDLPVEDAAYIHWYLHQEGKAPQRLLYYDVSTSKV
VLESGISPGKYQTYASTRRSFRFILENLIEHDSGVYYCATWD
>V93RF-ABGA01297342.1-iglv |(5546, 5856)|2.12797039914|(0.898,0.599,0.938)|1
SLSQPVPTEPSSHSASSGASARLTCTLSSGFSVGDFWISWYQQKPGNPPRYLLYYHSDSD
KGQGSGVPSRFSGSNDASANAGILRISGLQPEDEADYYCGT
>V94RF-ABGA01301078.1-trbv |(8868, 9168)|2.99280401921|(1.000,1.000,0.993)|1
HTGAGVSQSPRYKVTKRGQDVALRCDPISGHDYLYWYQQALGQGPEFLTYFQNDVQLDKS
GMPSDRFSAEGLEGSISTLKIQRTEQGDSAVYLCASSL
>V95RF-ABGA01301081.1-trbv |(710, 1000)|2.13911562863|(0.981,0.821,0.702)|1
ETGVTQSPTYLIKTRGQQVTLRCSPISGHKSVSWYQQALGQGPQFIFQYYREEENGRGNF
PRRFSGHQFLNHSSELNVNALELEDSALYLCASSL
>V96RF-ABGA01301082.1-trbv |(3712, 4002)|2.24121887804|(0.971,0.821,0.735)|1
ETGVTQSPTYLIKTRGQQVTLRCSPISGHKSVSWYQQALGQGPQFIFQYYREEENGRGNF
PHRFSGHQFLNHTSELNVNALELDDSALYLCASSL
>V97RF-ABGA01301083.1-trbv |(1589, 1880)|2.99899200002|(0.999,1.000,1.000)|1
NAGVTQTPKFRILKTGQSMTLQCAQDMNHNYMYWYRRDPGMGLKLIYYLVAAGTTDKGEV
PDGYSVSRSTTEDFPLTLESAAPSQTSVYFCASSY
>V98RF-ABGA01301086.1-trbv |(3670, 3966)|3.0|(1.000,1.000,1.000)|1
PVDAGVTQSPTHLIKTRGQQVTLRCSPISGHKSVSWYQQALGQGPQFIFEYYEKEERGRG
NFPDRFSARQFPNYSSELNVNALLLGDSALYLCASSL
>V99RF-ABGA01301086.1-trbv |(10960, 11257)|2.98575601537|(0.999,0.994,0.993)|1
PMNAGVTQTPKFQVLKTGQSMTLQCAQDMNHDYMSWYRQDPGIGLRLIHYSVAAGITEKG
ETPSGYNVSRSNTEDFPLRLESAAPSQTSVYFCASSY
>V100RF-ABGA01301086.1-trbv |(15590, 15890)|2.98276801985|(0.991,0.998,0.994)|1
HTGAGVSQSPRYKVTKRGQDVALRCDPISGHVSLFWYQQALGQGPELLTYFQNEVQLHKS
GLPSDRFFAERPEGSICTLKIQRTQQEDSAMYLCASSL
>V101RF-ABGA01313761.1-ighv |(1090, 1396)|3.0|(1.000,1.000,1.000)|1
VLSQVQLQESGPGLVKPSETLSLTCAVSGGSISGYYWSWIRQPPGKGLEWIGYIYSSGST
NYNPSLKSRVTVSVDTSKNQFSLKLSSVTAADTAVYYCAR
>V102RF-ABGA01313761.1-ighv |(5857, 6178)|1.540858137|(0.478,0.561,0.549)|1
KVAFTHSCVLSTGAHSQVQLGQSGPEVKKPGSSVKVSCKASGYTFTSSAMQWVRQSPGEG
LEWIGWIIVGSGNTNYAQKFQGRVTITRDMSTSTAYMELSSLRSE
>V103RF-ABGA01313763.1-ighv |(465, 774)|2.99799600001|(0.999,0.999,1.000)|1
AHSQVQLGQSGPQVKKPESSVKVSCKASGYTFTSSAMQWVRQAPGQGLEWIGWIIVGSGN
TNYAQKFQGRVTITRDTSTSTAYMELSSLRSEDTAVYYCAA
>V104RF-ABGA01313764.1-ighv |(1353, 1662)|2.94264947362|(0.993,0.960,0.994)|1
VLSQVQLQESGPGLVKPSETLSLTCAVSGGSISSSYYWGWIRQPTGKGLEWIGHIYSSGS
TYYNPSLKSRVTISVDTSKNQFSLKLSSVTAEDTAVYYCAR
>V105RF-ABGA01318850.1-igkv |(776, 1076)|3.0|(1.000,1.000,1.000)|1
SRCDIQMTQSPSSVSASVGDRVTITCQASQGVSNALAWYQQKPGKTPKLLIYDATTLQSG
VPSRFSGSGSGTDYTLTISSLQPEDFATYYCQQYNSYP
>V106RF-ABGA01321409.1-igkv |(1894, 2185)|2.99899600001|(1.000,0.999,1.000)|1
DIQMTQSPSSVSASVGDRVTITCRASQSISSWLAWYQQKPGKAPKLLIYKASNLQSGVPS
RFSGSGSGTDFTLTISSLQPEDFATYYCQQYSSTP
>V107RF-ABGA01321410.1-igkv |(12114, 12400)|2.99082001102|(1.000,0.997,0.994)|1
IVMTQSPATLSVSPGERGTISCRASQSVSNYLAWYQQKPGQSPRLLIYRASNRATGIPAR
FSGSGSGTDFTLTISSVEPEDFAVYYCQQYNTG
>V108RF-ABGA01335280.1-iglv |(1203, 1509)|2.98998400013|(0.996,0.996,0.998)|1
DSQTVVTQEPSFSVSPGGTVTLTCGLSSGSVSTSYYPSWYQQTPGQALRMLIYSTNTRTS
GVPDCFSGSILGNKAALTITGAQADDESDYYCVLYMGSGI
>V109RF-ABGA01342015.1-igkv |(1575, 1875)|3.0|(1.000,1.000,1.000)|1
TRCDIQMTQSPSSLSASVGDRVTITCRASQSISNYLAWYQQKPGKVPKLLIYAASTLQSG
VPSRFSGSGSGTDFTLTISSLQPEDVATYYCQKHNSAP
>V110RF-ABGA01356721.1-igkv |(4236, 4536)|3.0|(1.000,1.000,1.000)|1
SRCDIQMTQSPSSLSASVGDRVTITCRASQSISSWLAWYQQKPGKAPKLLIYAASSLQSG
VPSRFSGSGSGTDFTLTISSLQPEDFATYYCQQHNSYP
>V111RF-ABGA01356722.1-igkv |(4085, 4385)|2.75597603446|(0.989,0.846,1.000)|1
SRCDIQMTQPPSSMSAYVGDRVTVNCQASQGISSWLAWYQQKPGKAPKLLIYKASSLQSG
VPSRFSGSGSGTDYTLTISSLRPEDFATYYCQQANGVP
>V112RF-ABGA01356724.1-igkv |(802, 1093)|3.0|(1.000,1.000,1.000)|1
DIQMTQSPSSVSASVGDRVTITCRASQGISNYLNWYQQKPGKAPKLLIYAASSLQSGVPS
RFSGSGSGTDFTLTISSLQPEDFATYYCQHFNSYP
>V113RF-ABGA01356726.1-igkv |(7542, 7842)|3.0|(1.000,1.000,1.000)|1
TTGEIVLTQSPATLSLSPGERATVSCRASQSVSNYLAWYQQKPGQSPRLLIYDASNRATG
IPARFSGSGSGTDFTLTISSLEPEDFAVYYCQQYNNQT
>V114RF-ABGA01356729.1-igkv |(273, 573)|3.0|(1.000,1.000,1.000)|1
ARCDIQMTQSPSSVSASVGDRVTITCRASQGISSYLAWYQQKPGKAPKLLIYAASSLQSG
VPSRFSGSGSGTEFTLTISSLQPEDFATYYCMQHNSYP
>V115RF-ABGA01362157.1-ighv |(1861, 2165)|2.93907315918|(0.983,0.994,0.964)|1
CAEVQLVQSGAEVKRPGESLRISCKGSGYSFTSYWISWVRQMPGKGLELMGMIDPSDSDT
RYSQSFQGHITISADKSISTAYLQWTSLKASDTAMYYCA
>V116RF-ABGA01378070.1-trbv |(11166, 11457)|2.12440313637|(0.762,0.686,0.710)|1
LMEADIYQTPRHRVIRTGKKITLECSQTMGHDKRYWSRSRNGITPHPLFLWVNSTEKGDL
SSESTVSRIRIQHFPLTLESASPSHTSQYLCASSE
>V117RF-ABGA01384193.1-ighv |(10967, 11276)|2.99899200002|(0.999,1.000,1.000)|1
VQCEVQLVESGGGLVQPGGSLRLSCAASGFTFSSYGMNWVRQAPGKGLEWVSYISGDSSY
INYADSVKGRFTISRDNAKNSLYLRMNSLRAEDTAVYYCVK
>V118RF-ABGA01386446.1-trav |(520, 807)|3.0|(1.000,1.000,1.000)|1
VNSQQGEEDPQALSIQEGENATMNCSYKTSINNLQWYRQNSGRGLVHLILIRSNEREKHS
GRLRVTLDTSKKSSSLLITASRAADTASYFCATD
>V119RF-ABGA01386446.1-trav |(6159, 6450)|2.99496000066|(0.999,0.996,1.000)|1
RTNGDPVTQTEGPVTLPERAALTLNCTYQSSYSAFLFWYVQYLNKEPELLLRSSENQETD
SRGFQASHVKSDSSFHLEKPSVQLSDSAVYYCVLR
>V120RF-ABGA01386446.1-trdv |(9538, 9841)|2.99599600001|(0.999,0.998,0.999)|1
SSMAQKVTQAQAAISVVEKEEVTLDCVYETRDATYYLFWYKQPSSGELVFLIRQNSFNEQ
NEVNGRYSWNFQKSTSSFNLTITASQVMDSAVYFCALSE
>V121RF-ABGA01386449.1-trav |(5636, 5936)|1.64534878814|(0.758,0.612,0.536)|1
LSGEDQEKSPEALRLQEGESSSLNCSYTVSGLRGLFWYRQDPGKGPELLFFLYSAGEEKE
KERLKATLTKKESFLHITAPKPEDSATYLCAVQARCSP
>V122RF-ABGA01386453.1-trav |(7857, 8156)|1.9375616496|(0.738,0.552,0.969)|1
VSSKQEVTQIPGALSVPEGENLVLNCSFTDSAIYNLRWFRQDPGKGLTSLLFIQSSQREQ
TSGRLNASLDKSSGRSTLSIAASQPGDSATYLCAVRHS
>V123RF-ABGA01387831.1-trav |(4904, 5207)|2.98759608|(0.999,0.989,1.000)|1
PGIAQKITQTLPAMFVQEKEAVTLDCTYDTSDQSYGLFWYKQPSSGEMILLIYQGSYDKQ
NATEGRYSLNFQKARKSANLVISASQLGDSAMYFCAMKE
>V124RF-ABGA01387833.1-trav |(6325, 6619)|2.99196000066|(0.996,0.997,0.999)|1
RTHGDSVTQMEGPVTLSEEAFLTINCTYTATGYPSLFWYVQYPGEGLQLLLKATKADDKG
SNKGFEATYHKETTSFHLEKDSVRESDSGVYFCALS
>V125RF-ABGA01387833.1-trav |(37695, 37988)|2.99698000014|(0.998,1.000,0.999)|1
VWCQQKEVEQNPGPLSVPEGAIASLNCTYSNSAFQYFMWYRQYSRKGPELLIYIYSSGNK
QDGRFTAQVDTSGKYMSLFIRDSQPSDSATYLCAMS
>V126RF-ABGA01394059.1-igkv |(7736, 8051)|2.92405208401|(0.999,0.996,0.942)|1
SSGDIVMTQSPLSLPVTPGEPASISCRSSQSLLHSNRYNYLNWYLQKPGQSPQLLIYLGS
NRASRVPDRFSGSGSGTDFTLKISRVEAEDVGVYYCTQTLQTP
>V127RF-ABGA01394062.1-igkv |(9765, 10067)|2.99798400013|(1.000,0.998,1.000)|1
SSAEIVMTQTPLSLSITPGEPASISCRSSQSLLHSDGNTYLHWYLQKPGQPPQLLIYEVS
NRFSGVPDRFSGSGSGTDFTLKISRVEAEDVGVYYCMQD
>V128RF-ABGA01394064.1-igkv |(17826, 18124)|1.98792144401|(0.994,0.546,1.000)|1
SRGEIVLTQSPAFRSETLKEKVTITCRASQSIGSRLHWYQQKPDQSPKLLIKYASQSISG
VPSRFSGSGSGTDFTLTINSLEAEDAATYYCQQGSSL
>V129RF-ABGA01394066.1-igkv |(10063, 10363)|2.98894800078|(0.998,0.995,0.996)|1
TTGEIVLTQSPATLSLSPGERATLSCRASQSVSNYLAWYQQKPGQVPRLLIYRASNRTTG
IPDRFSGSGSGTDFTLTISRLDPEDFAVYYCQQYGSSP
>V130RF-ABGA01394066.1-igkv |(40656, 40948)|2.62937169718|(0.995,0.793,0.992)|1
SRGDIVMTQSPAFLSVTPVEKVTITCQASEGISNYLNWYQQKPDQAPKLLIKYASQSISG
VPSRFSGSGSGTDFTFTISSLEAEDAATYYCQQGN
>V131RF-ABGA01394068.1-igkv |(3664, 3964)|3.0|(1.000,1.000,1.000)|1
SRCDIQMTQSPSSVSASVGDRVTITCRASQGISNYLAWYQQKPGKAPKLLIYYASSLQSG
VPSRFSGSGSGTDYTLTISSLQPEDFATYYCQQYNSYP
>V132RF-ABGA01394071.1-igkv |(1743, 2043)|3.0|(1.000,1.000,1.000)|1
SRCDIQMTQSPSSLSASVGDRVTITCQASQGISNALAWYQQKPGKTTKLLIYRASSLQSG
VPSSFSGSGSGTDFTLTISSLQPEDFATYYCQQYYSDP
>V133RF-ABGA01394075.1-igkv |(3782, 4082)|2.99067605248|(1.000,0.991,1.000)|1
TTGEIVMTQSPATLSLSPRERATISCRASQSVSSNLAWYQQKPGQAPRLLIYGASNRATG
IPARFSGSGSGTDFTLTISSLEPEDFAVYYCQQYNNWP
>V134RF-ABGA01047585.1-trbv |(3005, 3305)|2.72625050302|(0.924,0.876,0.936)|-1
CFHAKVTQTPGYLVKGKGKKTKMYCTPEKGHTFVCWYQQNQNKEFMFLISFQNEQVLQET
EMHKKRFSSRCPKNPPCSLAILSLEPGDTALYLCASSP
>V135RF-ABGA01052527.1-trbv |(437, 737)|2.15710709422|(0.874,0.610,0.928)|-1
CFHAKVTQTPGYLVKGKGRKTKMYCTPAKGHTFVCWYQQNQNKEFMFLISFQNEQVLQET
EMHKKRFSSQCPKNPPCSLAILSLEPGDTALYLCASSP
>V136RF-ABGA01061552.1-trav |(1941, 2240)|2.5840861335|(0.893,0.786,0.979)|-1
VNGQQVMQIPQCQHVQEGEDFTTYCNSSIALSNIQWYKQRPGGHPVFLIQLVKSGEVKKQ
KRLTFQFGEAKKNSSLHITATQTTDVGTYFCAGHSAPQ
>V137RF-ABGA01061554.1-trdv |(7774, 8077)|2.12776134383|(0.822,0.624,0.827)|-1
SSVAQQVTQAQSSVSMPVGKAVTLNCLYETSWWWSYYIFWYKQPPSKEMIFLIRQGSGEQ
NAKNGRYSVTFKEAAKSIALTISALQLEDSAKYFCAVWE
>V138RF-ABGA01083932.1-trav |(371, 664)|2.99498000014|(0.998,0.997,1.000)|-1
VSRGESVRPHLSTLGVQEGDNSVINCAYSDSASDYFIWYKQESGKGPQFIIDIRSNMDKR
QGQRVTVLLNKTVKHLSLQIAATQPGDSAVYFCAEN
>V139RF-ABGA01083934.1-trav |(495, 792)|2.99493200206|(1.000,0.996,0.999)|-1
GTRAQSVTQLDSHVSVSEGALVLLRCNYSSSVSPYLFWYVQYPNQGLQLLLKYTSGTTLV
KGINGFEAEFKKSETSFHLTKPSAHVSDTAQYFCAVS
>V140RF-ABGA01083937.1-trav |(4214, 4504)|2.99699200002|(0.999,0.998,1.000)|-1
VNGENVEQHPSTLSVQEGDSSVIKCTYSDSASNYFPWYKQEVGKGPQFIIDIRSNMGEKK
DQRITVILNKTAKHFSLHITETQPGDSAVYFCAAS
>V141RF-ABGA01083938.1-trav |(4846, 5150)|1.92429940239|(0.883,0.569,0.816)|-1
TARAQSVTQPDIHITVSEGTSLELRCNYSYGATPSLFWYVQFPGQGLQLLLKYFSGETLV
QGIKSFEAEFKRSQSSFNLRKSSVHWSDAAEYFCAAGGA
>V142RF-ABGA01083939.1-trav |(4457, 4751)|3.0|(1.000,1.000,1.000)|-1
GINGDSVVQTEGQVLLSEGDSLIVNCSYETTQYPSLFWYVQYPGEGPQLLLKAMKANDKG
RNKGFEATYRKETTSFHLEKDSVQESDSAVYFCALS
>V143RF-ABGA01083939.1-trav |(18067, 18360)|3.0|(1.000,1.000,1.000)|-1
GSGKNQVEQSPQSLIILEGKNCTLQCNYTVSPFSNLRWYKQDTGRGPVSLTIMTFSENTK
SNGRYTATLDADTKQSSLHITASQLSDSASYICVVS
>V144RF-ABGA01083939.1-trav |(34050, 34338)|2.99899600001|(1.000,0.999,1.000)|-1
VWSQQKEVEQDPGPFNVPEGATVAFNCTYSNSASQSFFWYRQDCRKEPKLLMSVYSSGNE
NGRFTAQLNRASQYISLLIRDSQLSDSATYLCAV
>V145RF-ABGA01083939.1-trav |(39521, 39818)|2.98585201038|(0.993,0.994,0.999)|-1
GTRAQSVTQLDSHVPVSEGTRVLLRCNYSSSYSPSLFWYVQHPNQGLQLLLKYLSGPTLV
KGINGFEAEFKKSETSFHLTKSSAHVSDAAEYFCAMS
>V146RF-ABGA01113129.1-trav |(4972, 5260)|2.98796800026|(0.996,0.994,0.998)|-1
VKSQKIEQNSEALNIQEGKTATLTCNYTNYSPTYLQWYRQDPGRGPVFLLLIRENEKEKR
KERLKVSFDTTLKQSLFHITASQPADSATYFCAL
>V147RF-ABGA01113130.1-trav |(6720, 7010)|2.99498000014|(0.998,1.000,0.997)|-1
MSRGEDVEQTLFLSVQEGDSSVINCTYTDSSSTYLYWYKQEPGAGLQLLTYIFSNMDLKQ
DQRLTVLLNKKDKHLSLRIADTQTGDSAIYFCAEH
>V148RF-ABGA01113133.1-trav |(15271, 15560)|2.96719216959|(0.996,0.985,0.987)|-1
QSVAQPEDEVTVAEGNPLTVKCTYSVSGNPYLFWYIQYPNEGLQFLLKYITGDNLVKGSY
GFEAEFNKSQTSFHLKKPSALVSDSALYFCAVRD
>V149RF-ABGA01132346.1-trgv |(695, 1008)|2.96455466254|(0.999,0.993,0.975)|-1
SQKSSNLEGGTKSVTRPTRSSAEITCDLTVTNALYIHWYLHQEGKAPQRLLYYDVSTARD
VLESGLSPGKYYTHTPRRWSWILRLQNLIENDSGVYYCATWD
>V150RF-ABGA01154384.1-igkv |(10732, 11047)|2.91649766228|(0.981,0.987,0.952)|-1
CNGDIVLTQSPASLAMSPGQRATITCRASESVSVLGMTNLIHWYQQKPGQPPKLLIYRAS
NKDTGVPARFSGSGSGTDFTLTINPVEADDAANYYCMQSKNFP
>V151RF-ABGA01154386.1-igkv |(10957, 11257)|2.98542016586|(0.999,1.000,0.987)|-1
ARCDIQMTQSPSSLSASVGDRVTITCRASQGISSWLAWYQQKPGKAPKPLIYKVSSLESG
IPSRFSGSESGTEFTLTISSLQPEDFATYYCQQYNSVP
>V152RF-ABGA01161530.1-igkv |(226, 526)|2.99899600001|(1.000,1.000,0.999)|-1
IRCDIQMTQSPSSLSASVGDRVTITCRASQGISNYLNWYQQKPGKAPKLLIYRASNLQTG
VPSGFSGSGSGTDFTLTISSLQPEDIATYYCQQYDNLP
>V153RF-ABGA01164369.1-igkv |(1745, 2045)|2.15258692753|(0.958,1.000,0.601)|-1
IRCDIQMTQSPSSLSASVGDRVTITCRASQGISNYLNWYQQKPGKAPKLLIYRASNLQTG
VPPRFSGSRSGTDFTLTISSLQPKDIATYYCQQYDNLP
>V154RF-ABGA01180641.1-igkv |(2646, 2946)|2.99899600001|(1.000,1.000,0.999)|-1
ARCDIQMTQSPSSVSASVGDRVTITCRASQSISSWLAWYQKKPGKAPKLLIYKASSLQSG
VPSRFSGSGSGTEFTLTISSLQPEDFATYYCTQHNSYS
>V155RF-ABGA01180644.1-igkv |(8050, 8350)|3.0|(1.000,1.000,1.000)|-1
ARGDIQMTQSPSSLSASVGDRVTITCRASQSISSYLAWYQQKPGKAPKPLIYAASNLQSG
VPSRFSGSGSGTEFTLTISSLQPEDFATYYCQQYKSDP
>V156RF-ABGA01180644.1-igkv |(24182, 24473)|2.99899600001|(1.000,0.999,1.000)|-1
DIQMTQSPSSVSASVGDRVTISCRASQSISSWLAWYQKKPGKAPKLLIYKASSLQSGVPS
RFSGSGSGTEFTLTISSLQPEDFATYYCTQHNSYP
>V157RF-ABGA01199503.1-igkv |(3988, 4290)|2.9701803079|(0.996,0.982,0.993)|-1
SSGDVVMTQSPLSLPVTLGQPASISCRSSQSLVHSDGNTYLNWFQQRPGQPPRRLIYKVS
NRDSGVPDRFSGSGAGTDFTLKISRVEAEDVGVYYCMQG
>V158RF-ABGA01203420.1-ighv |(3238, 3544)|2.99294800078|(0.998,0.995,1.000)|-1
VQCEVQLVESGGGLVQPGGSLRLSCAASGFTVSSNEMSWIRQAPGKGLEWVSTISRGGST
YYTDSVKGRFTISRDNSKNTLYLQMNSLRVEDTAVYYCAR
>V159RF-ABGA01203422.1-ighv |(651, 957)|2.53984539024|(0.981,1.000,0.751)|-1
VLSQVQLQESGPGLVKPSETLSLTCAVSGGSISSNYWSWIRQPPGKGLEWIGHIHYGGSN
YLNPSLKSRVTISVDTSKNQFSLKLSSVTAADTAVYYCAR
>V160RF-ABGA01223433.1-trbv |(4452, 4749)|2.99498400013|(0.999,0.997,0.999)|-1
PVNAGVTQTPKFHVLKTGQSMTLQCAQDMNHDYMSWYRQDPGMGLRLIHYSAGAGITDKG
EVPNGYNVSRLNTEDFQLRLESAAPSQTSVYFCASSY
>V161RF-ABGA01225869.1-trbv |(7999, 8296)|2.9888400105|(0.999,0.993,0.997)|-1
PLEAQVTQNPRYLITVTGKKLKVTCSQNMNHEYMSWYRQDPGLGLRQIYYSMNVEVVDKG
DVPEGYNVSRKEKRNFPLILESPSPNQTSLYFCASSL
>V162RF-ABGA01225869.1-trbv |(13353, 13650)|2.91267000129|(1.000,0.999,0.932)|-1
LVDVKVTQSSRYLVKRMGEKVFLECVQDMDHERMFWYRQDPGLGLRLIYFSYDVKMKEQG
DVPEGYSVSREKKGHFSLILESASTNQTSMYLCASSL
>V163RF-ABGA01245923.1-iglv |(7513, 7823)|1.9089585552|(0.918,0.563,0.845)|-1
SLSQPVQTQPSSHSACSGASARLTCTLSSGFSVGDFWISWYQQKPGNPPRYLLYYHSDSD
KGQASGVPSRISGSDDASANAGILHISGLQPEDEADYYCGT
>V164RF-ABGA01252206.1-iglv |(13174, 13484)|2.90635550935|(0.998,0.964,0.956)|-1
SWDQSALIQPPSMSGSPGQSVTISCTGTSSDVGGYNYVSWYQQHPGTAPKLMIYAVSNQP
SGVPNRFSGSKSGNTASLTISGLQAEDEADYYCSSYAGSNN
>V165RF-ABGA01252209.1-iglv |(753, 1069)|2.74544383928|(0.957,0.862,0.962)|-1
CVSPFPGSWAQSALIQPPSVSGSPGQSVTISCTGTSSNYVSWYQQHPGKAPKLMIYEVSK
RPSGVPDRFSGSKSGNTASLTISGLQAEDEADYYCSSYASSNN
>V166RF-ABGA01252210.1-iglv |(1732, 2028)|2.895975705|(0.978,0.952,0.969)|-1
SVASYELTQPLSVSVAPGQTARITCGGNNIGSKAVQWYQQKPGQAPLLVIYSDSNRPSGI
PEQFSGSNLGNTATLTISGAQAGDEADYYCQVRDSST
>V167RF-ABGA01252215.1-iglv |(9236, 9539)|2.99174403277|(1.000,0.992,1.000)|-1
SEASYELTQPPSVSVSPGQTARITCSGDALPKKYAYWFQQKSGQAPVLVIYKDSKRPSGI
PERFSGSSSGTMATLTISGAQVEDEADYYCYSTDSSGNH
>V168RF-ABGA01252216.1-iglv |(11892, 12202)|2.84365312015|(0.996,0.933,0.942)|-1
SWAQSALTQPRSVSGSPGQSVTISCTGTSSDIGGYNAVSWHQQHPGKAPKLMIYDVSNRP
SGVPNRFSGSKSGNMASLTISGLQAEDEADYYCSSYAGSYT
>V169RF-ABGA01252218.1-iglv |(480, 780)|2.99798400013|(1.000,1.000,0.998)|-1
SVTSYELTQPHSVSVATAQTARITCGGNNIGSKAVHWYQQKPGQAPVLVIYDDSNQPSGI
PERFSGSNSGNTATLTISGAQAGDEADYYCQVWDSSKH
>V170RF-ABGA01252219.1-iglv |(2097, 2400)|2.99899600001|(1.000,1.000,0.999)|-1
SATSYELTQPPSVSVAPRQTARITCGGNNIGSKSVHWYQQKPGQAPVLVIYGDSNRPSGI
SERFSGSNSGNTATLTISRVEAGDEAVYYCQVWDSSSDY
>V171RF-ABGA01252219.1-iglv |(9992, 10295)|3.0|(1.000,1.000,1.000)|-1
SATSYELTQPPSVSVAPRQTARITCGGNNIGSKSVHWYQQKPGQAPVLVIYGDSDRPSGI
SERFSGSNSGNTATLTISRVEAGDEAVYYCQVWDSSSDY
>V172RF-ABGA01252219.1-iglv |(17960, 18263)|2.98758408012|(1.000,0.990,0.998)|-1
SVVSSELTQDPAVSVTLGQTVKITCQGDSLRSYYASWYQQKPGQAPVLVIYGNNNRPSGI
PDRFSGASSGNTASLTITGAQAEDEADYYCNSWDGSGNH
>V173RF-ABGA01252219.1-iglv |(34167, 34477)|2.99396400065|(0.997,1.000,0.997)|-1
SWAQSALTQPPSVSGSPGQSITISCTGTSSDVGGYNYVSWYQQHPGTAPKLMIYDVSKRP
SGVPDRFSGSKSGNTASLTISGLQTEDEADYYCSSYRSGDT
>V174RF-ABGA01252219.1-iglv |(46613, 46923)|2.99396800026|(0.998,1.000,0.996)|-1
SWAQSALTQPASVSGSPGQSITISCTGTSSDVGGYNYVSWYQQHPGKAPKLMIYDVSKRP
SGVPDRFSGSKSGNTASLTISGLQAEDEADYYCSSYRSGST
>V175RF-ABGA01252219.1-iglv |(70767, 71077)|2.98242016586|(0.998,0.999,0.986)|-1
SWAQSALTQPPSVSGSPGQSITISCTGTSSDIGGYNAVSWYQQHPGKAPKLMIYEVSKRP
SGVPDRFSGSKSGNTASLTISGLQAEDEADYYCSSYRSGGT
>V176RF-ABGA01252220.1-iglv |(4657, 4954)|2.89778802605|(0.989,0.943,0.975)|-1
SVDSYELTQPPSVSVSPGQTARITCSGDVLGENYADWYQQKPGQAPVLVIYKDSERPPGI
PERFSGSTSGNTTTLTISSVLTEDKADYYCLSGDEDN
>V177RF-ABGA01252221.1-iglv |(70213, 70518)|2.46812602152|(0.983,0.735,0.969)|-1
SEASYELTQPSSVSVSLGQTARITCSGDVLAKKYAQWFQQKPGQAPVLVIYKDSERPSGI
PERFSSSSSGTTVTLTISGAQVEDEADYYCYSGDDNNLTV
>V178RF-ABGA01252221.1-iglv |(89127, 89430)|2.79219716629|(0.991,0.864,1.000)|-1
FEASYELTQPHSVSVSPGQMARITCSGEELPENYAYWYQQKPGQSPVLVIYKDSERPSGI
PERFSGSSSGTTVTLTISGVQAEDEADYYCQSADSSGTY
>V179RF-ABGA01252241.1-iglv |(4150, 4460)|2.77460823243|(0.949,0.876,0.973)|-1
SLSQSMLTQPASLSASPGASASLTCTLRSDINVGTYRIYWYQQKPGSPPRYLLRYKSDSD
KHQGSGVPSRFSGSKDASANAGLLLISGLQSEDEAGYYCMI
>V180RF-ABGA01252241.1-iglv |(8984, 9293)|2.99598400013|(0.998,0.998,1.000)|-1
SWAQSVLTQPPSASGTPGQRVTISCSGSSSNIGSNYVYWYQQFPGMAPKHLIYDNNQQPS
GVPDRFSGSKSGTSASLAISGLRSKDEADYYCAAWDNSLSG
>V181RF-ABGA01252243.1-igkv |(11516, 11822)|1.93238966672|(0.655,0.595,0.880)|-1
SLSQPVLTQSSSASASLGSSVKLTCTLSSGHSSYAIAWHQQQPGKAPRYLMRLEGSGSYN
KGSGIPDRFSGSSSGADRYLTISNLQSEDEADYYCQTWDS
>V182RF-ABGA01252243.1-iglv |(44201, 44510)|2.9969280013|(0.997,1.000,1.000)|-1
SWAQSVLTRPPSVSAAPGQKVTISCSGSSSNIGNYAVSWYQQLPGTAPKLLIYENNKRPS
GISDRFSGSKSGTSATLGITGLQTGDEADYYCSAWDSSLSA
>V183RF-ABGA01252243.1-iglv |(49802, 50111)|2.99389600501|(1.000,0.995,0.999)|-1
SWAQSVLTQPPSASGTPGQRVTISCSGSSSNIGSNYVYWYQQFPGMAPKLLIYDNNQRPS
GVPDRFSGSKSGTSASLAISGLRSEDEADYYCAALDNSLSG
>V184RF-ABGA01252248.1-iglv |(2689, 2998)|2.72894983875|(0.928,0.878,0.933)|-1
SVVQAGLTQPPSVSKGLRQTATLTCTGNSNNVGNQGAAWLQQHQGHPPKLLSYRNNNRPS
GISERFSASRSGNTASLTITGLQPEDEADYYCSAWDSSLSA
>V185RF-ABGA01252248.1-iglv |(12457, 12769)|2.99192000218|(0.998,0.994,1.000)|-1
SWAEVVFTQPHSVSGSPGQTVTISCTRSSGSIDNRYVYWYQQRPGSAPTTVIYDDNQRPS
GVPDRFSGSIDSSSNSASLTISGLKSEDEADYYCQSANDSHN
>V186RF-ABGA01252249.1-iglv |(2028, 2335)|2.89134268749|(0.980,0.928,0.995)|-1
SWANFMLTQPHSVSGSVGQKVIISCTRSSGSIGSYYVQWYQQHSGSAPTTVINKDNQRPS
GVPDRFSGSIDSSSNSASLTISGLKTEDEADYYCQSYDSS
>V187RF-ABGA01257764.1-igkv |(287, 587)|2.45230559585|(0.996,0.720,0.999)|-1
ATCDIQMTQSPFSLSASVGDRVTITSRASQGITNELAWYQQKPGKAPKFLIYSASSLQTG
VTSRFSGSGSGTDYTLTISSLQPEDVATYYCQRDYNTP
>V188RF-ABGA01257764.1-igkv |(8367, 8682)|2.98242008525|(1.000,0.992,0.991)|-1
SSGDVVMTQTPLSLPVTPGEPASISCRSSQSLLHSDGNTYLDWYLQKPGQSPQLLIYRVS
NRASGVPDRFSGSGSGTDFTLKISRVEAEDVGVYYCMQATKTP
>V189RF-ABGA01257764.1-igkv |(15129, 15444)|2.54014435854|(0.985,0.755,0.991)|-1
TSGDIAMTQTPLSLPVTPGEPASVSCRSSQSLLHSDGNTYLDWYLQKPGQPPQLLIYMLS
YRASGVSDRFSGSGSGTDFTLKISRVEAEDVGVYYCMQALQAP
>V190RF-ABGA01257772.1-igkv |(3885, 4185)|3.0|(1.000,1.000,1.000)|-1
ARCAIQMTQSPSSLSASVGDRVTITCRASQGISNELSWYQQKPGQAPTLLIYAASSLQSG
VPSRFSGSGSGTDFTLTISSLQPEDVATYYCLQDYTTP
>V191RF-ABGA01257777.1-igkv |(9241, 9556)|2.96391237717|(1.000,0.968,1.000)|-1
SSGDIVMTQTPLSLPVTLGQPASMSCRSSQSLLDSDGYTYLDWYLQKPGQSPQLLIYEVS
NRASGVPDRFSGSGSGTDFTLKISRVEAEDVGVYYCMQALQVP
>V192RF-ABGA01259417.1-trbv |(2271, 2571)|2.99289600501|(0.999,1.000,0.994)|-1
HADTGVSQDPRHKITKRGQNVTFRCDPISEHNRLYWYRQTLGQGPEFLTYFQNEAQQEKS
GLFSDQFSAERPKGSFSTLKIQRTEQGDSAMYLCASSL
>V193RF-ABGA01276916.1-igkv |(1327, 1627)|3.0|(1.000,1.000,1.000)|-1
ARCDIQMTQSPSSVSASVGDRVTITCRASQSISSWLAWYQQKPGKAPKLLIYKASNLQSG
VPSRFSGSGSGTDFTLTISSLQPEDFATYYCIQHSSTP
>V194RF-ABGA01277799.1-trbv |(1145, 1442)|2.06742273121|(0.930,0.584,0.934)|-1
HRDAGITQSPRYKVTETGRQVTLTCHQTWSHSYMFWYRQDLGHGLRLIYYSTATGITDKG
EVPDGYIVSRSKTENFLLTLESATRSQTSVYFCASSE
>V195RF-ABGA01277800.1-trbv |(311, 608)|1.8891057601|(0.935,0.504,0.984)|-1
HRDAGITQSPRHKITETGRQVTLTCHQTWSHSYMFWYRQDLGHGLRLIHYSLGVPDTNKG
EVSDGYTVSRSKTEDFPLTLESAASSQTSVYFCASSE
>V196RF-ABGA01277802.1-trbv |(3406, 3702)|2.89483763492|(0.976,0.966,0.955)|-1
PVQAGVTQSPTHLIKMRGQQVTLRCSPFSGHTSVSWYQQSLGQGPQFIFEYANELRRSKG
NFPDRFSGRQFRDYHSEMNVSALELGDSALYLCASRL
>V197RF-ABGA01277802.1-trbv |(6147, 6443)|3.0|(1.000,1.000,1.000)|-1
PVDSGVTQTPKHLITATGQRVTLRCSPRSGDLSVYWYQQSLDQGLQFLIQYYNGEEREKG
NILERFSAQQFPDLHSELNLSSLELGDSALYFCASSV
>V198RF-ABGA01277803.1-trbv |(1353, 1650)|2.90128218009|(0.980,0.966,0.958)|-1
PVQAGVTQSPTHLIKMRGQQVTLRCSPFSGHTSVSWYQQSLGQGPQFIFEYANELRRSKG
NFPDRFSGRQFRDYHSEMNVSALELGDSALYLCASKV
>V199RF-ABGA01277806.1-trbv |(4577, 4874)|2.79443046761|(0.985,0.924,0.918)|-1
PVIAGITQAPRSQILAAGRSVTLRCTQDMRHNAMYWYRQDLGLGLRLIHYSNTAGTIGKG
EVPDGYSVSRANTDDFPLTLVSAIPSQTSVYFCASSD
>V200RF-ABGA01277808.1-trbv |(1866, 2166)|2.98759608|(0.999,1.000,0.989)|-1
HTGAGVSQSPSNKVTEKGKDVELRCDPISGHTALYWYRQSLGQGLEFLIYFQGNSAPDES
GLPSDRFYAERSGGSISTLKIQHTQQEDSAMYLCASSL
>V201RF-ABGA01277809.1-trbv |(3151, 3448)|2.99396400065|(0.999,0.999,0.996)|-1
PLDTAVSQTPKYLVTQMGKKESLKCEQNLGHDAMYWYKQDSKKFLKIMFIYNNKEPILNE
TVPNRFSPNSPDKAHLQLHISSLELGDSAVYFCASSQ
>V202RF-ABGA01277809.1-trbv |(6593, 6890)|1.6878069589|(0.617,0.868,0.489)|-1
PMEMGVTQTPRHLVMGMTNKKSLKCEQDLGHNAMYWYKQSAEKPLELMFAYNLKEPTENN
SVPSRFLPECPNSSHLFLHLHALQPEDSALYLCTSSQ
>V203RF-ABGA01277809.1-trbv |(14738, 15029)|3.0|(1.000,1.000,1.000)|-1
NAGVTQIPKFRVLKTGQSMTLQCAQDMNHDYMYWYRQDPGMGLRLIHYSAGEGTTTKGEV
PDGYNVSRLKKQNFLLGLESAAPSQTSVYFCASSY
>V204RF-ABGA01277810.1-trbv |(2890, 3187)|2.99385601037|(1.000,1.000,0.994)|-1
PVNAGVTQTPKFQVLKTGQSMILQCAQDMNHDYMYWYRQDPGMGLRLIHYSLDVGTTDKG
EVPDGYNVSRLNIQNFLLRLESAAPSQTSVYFCASSE
>V205RF-ABGA01277810.1-trbv |(5526, 5817)|2.98867205249|(0.999,1.000,0.990)|-1
NAGVTQTPKFRVLKTGQSITLQCAQDMNHNSMYWYRQDPGMGLRLIHYSVGAHSTEKGEV
PDGYNVSRLNTQNFLLRLKSAAPSQTSVYFCASSE
>V206RF-ABGA01277811.1-trbv |(730, 1043)|2.87013442802|(0.983,0.973,0.927)|-1
PMETGVTQTPRHLVMGMTNKKSLKCEQDLGHNAMYWYKQSAEKPPELMFVYNLKEPTENN
SVPSRFSPECPNSSHLFLHLHALQPEDSALYLCASSQDTALQ
>V207RF-ABGA01277815.1-trbv |(5061, 5368)|2.98996000066|(0.998,0.995,0.997)|-1
PVNAGVTQTPKFQVLKTGQSMTLQCAQDMNYDNMYWYRQDPGMGLKLIHYSVGEGTTDKG
EVPDGYNVSRLNRQNFLLRLESAAPSQTSVYFCASGYSTA
>V208RF-ABGA01277825.1-trbv |(768, 1064)|2.78827949387|(0.953,0.874,0.992)|-1
PVEAGVTQTPRCLIKTRGRQVTLSCSPISGHRSVSWYQQTPGQGLQFLFEYFSGTQREKG
NFPDRFSGHQFSNSRSEMNVSALELGDSALYLCASSL
>V209RF-ABGA01277826.1-trbv |(1650, 1966)|2.45776970052|(0.919,0.735,0.931)|-1
PVEAGVTQTPRCLIKTRGRQVTLSCSPISGHRSVSWYQQTPGQGPQFLFEYFSGTQREKG
NFPDRFSGHQFSNSRSEMNVSALELGDSALYLCASSLAQPYKA
>V210RF-ABGA01277827.1-trbv |(7144, 7457)|2.90412019143|(0.998,0.996,0.929)|-1
PIDTEVTQTPKHLVMGMTNKKSLKCEQHMGHRTMYWYKQKAKKPPELMFAYSYEKLSINE
SVPSRFSPECPKSSLLNLHLHALQPEDSALYLCASSQDTALQ
>V211RF-ABGA01277830.1-trbv |(4944, 5235)|2.79130075255|(0.930,0.917,0.946)|-1
PEVTQTPSHQVTQMGQEVILQCVPISNHLYFYWYRQILGQKIEFLVYFFNDKISEKSEIF
DDRFSAERPDGSNFTLKIQSTKLEDSAMYFCASSE
>V212RF-ABGA01277830.1-trbv |(8902, 9215)|1.67816871792|(0.548,0.880,0.727)|-1
PMDTRITQTPKHMVTAMGSKRMLKCEQHLGRDSMYWYRQKAKKSLEFMFYHSFKELIENE
TVPNHCTPECPDSSRLYLHVVALQPEIQLCIFCTSSQDTALQ
>V213RF-ABGA01277830.1-trbv |(10763, 11061)|2.35891183584|(0.928,0.764,0.817)|-1
TQTPSHQVTQMGQEVILQCVPIPNHLRFYWYRQILGQKVEFLVSFYSDKISEKSEIFDDR
FSVRRPDGSHFTLKIQSTKLEDSAMYFCASSEGTALQ
>V214RF-ABGA01277831.1-trbv |(8933, 9224)|2.04947990196|(0.951,0.882,0.609)|-1
PEVTQTPSHQVTQMGQEVILQCVPISNHLYFYWYRQILGQKVEFLVSFYSDKISEKSEIF
DDRFSVRRPDRSHFTLKIQSTKLEDSAMYFCASSE
>V215RF-ABGA01277831.1-trbv |(20035, 20348)|2.97520030738|(0.996,0.998,0.982)|-1
PIDTGITQTPKHLVMGMANKKSLKCEQHMGHKAMYWYKQKVKKPPELMFVYNYEELSINE
SVPSRFSPECPKSSLLNLHLHALQPEDSALYLCASSQDTALQ
>V216RF-ABGA01277831.1-trbv |(28336, 28627)|2.48555835466|(0.956,0.784,0.880)|-1
PEVTQTPSHQVTQMGQEVVLQCVPIPNHLNFYWYRQILGQKVEFLVYFYNDNISEKSEIF
DDRFSVERPNGSHFTLKIQSTKLEDSAMYFCASSE
>V217RF-ABGA01315458.1-igkv |(1340, 1640)|2.98867205249|(0.999,1.000,0.990)|-1
TTGEIVMTQSPATLSLSPGERATLSCRASQSVSNYLAWYQQKPGQAPRLLIYGASNRATG
IPARFSGSGSGTDFTLTISSLEPEDFAVYYCQQGNNLP
>V218RF-ABGA01321066.1-trav |(553, 839)|1.74322573396|(0.563,0.591,0.812)|-1
VSAAKNEVEQSPQDLTAQEGELITINCSYSVGTNALHWLQQHPGGGIVSLFMLSSGKKKN
GRLIATINIQEKHSSLHITASQPRDSAIYICAV
>V219RF-ABGA01321067.1-trav |(4468, 4758)|1.88203755023|(0.833,0.840,0.525)|-1
GTSSNSVKQTGQITVSEGASVTMNCTYTSAGYPTLFWYVQYPSKPLQLLQRETMENSKNF
GGRNIKDKNSPIVKYSVQVSDSAVYYCLLGDTVLK
>V220RF-ABGA01321068.1-trav |(6457, 6745)|2.99899600001|(1.000,0.999,1.000)|-1
LSGELKVGQNPLFLSTQEGKNYTIYCNYSTTSDRLYWYRQDPGKSLESLFVLLSNGAVKQ
EGRLMASLDTKARLSTLHITAAVHDLSATYFCAV
>V221RF-ABGA01321070.1-trav |(796, 1096)|3.0|(1.000,1.000,1.000)|-1
FSMAQTVTQSQPEMSVQEAETVTLSCTYDTSESDYYLFWYKQPPSRQMILVIRQEAYKQQ
NATENRFSVNFQKAAKSFSLKISDSQLGDAAMYFCAYR
>V222RF-ABGA01321072.1-trdv |(3234, 3535)|2.81233318446|(0.998,1.000,0.874)|-1
SSMAQTVTQSQPEMSVQEAETVTLSCTYDTSESNYYLFWYKQPPSRQMILVIRQEAYKQQ
NATENRFSVNFQKAVKSFSLKISDSQLGDTAMYFCAFM
>V223RF-ABGA01321081.1-trav |(7033, 7323)|2.87399882769|(0.930,0.978,0.989)|-1
VSSEDKVVQSPLSLVVHEGDTVTLSCNYEVANFRSLLWYKQEKKAPTFLFMLTSSGIEKK
SGKLSSILDKKELFSILNITATQTRDSAIYLCAVE
>V224RF-ABGA01321090.1-trav |(1808, 2098)|2.08891934895|(0.683,0.880,0.999)|-1
TIIDAKTTQPTSMDCAEGRAANLPCNHSTISGNEYVYWFRQIHSQGPQYIIHGLKNNETN
EMASLIITEDRKSSTLILPHATLRDTAVYYCIVRV
>V225RF-ABGA01322683.1-igkv |(9303, 9618)|2.92422621922|(1.000,0.939,1.000)|-1
SSGDIVMTQTPLSLPVTLGQPASMSCRSSQSLLDSYGNTYLDWYLQKPGQSPQLLIYEVS
NRASGVPDRFSGSGSGTDFTLKISRVEAEDVGVYYCMQATQTP
>V226RF-ABGA01349559.1-trbv |(456, 747)|2.76390488653|(0.957,0.881,0.949)|-1
LMEADIYQTPRHCVIRTGKKITLECSQTMGHDKMYWSRSRNGITPHPLFLWVNSTEKGDL
SFESTVSRIRIERFPLTLESASPSHTSQYLCASSE
>V227RF-ABGA01354649.1-ighv |(173, 497)|2.39964261538|(0.831,0.888,0.732)|-1
AHSQVQLVQSEPEMKQPGASVKFSCKATGYTFTSYVMNWVRQAPGQGLEWVGWINTNTGN
PMYAQGFTGQFVFSMDTSVSTVYLQISSLKAEDMAVYYCLRDTVWK
>V228RF-ABGA01358461.1-trav |(1239, 1538)|2.30571431446|(0.756,0.747,0.969)|-1
VSSKQEVTQIPGALSVPEGENLVLNCSFTDRAIYNLQWFRQDPGKGLTSLLFIQSSQREQ
TSGRLNASLDKSSGRSTLSIAASQPGDSATYLCAVRHS
>V229RF-ABGA01360476.1-ighv |(4349, 4657)|2.99192000218|(0.998,1.000,0.994)|-1
AHSQVQLVQSGAEVKKPGTSVKISCKASGYTFTSYYMHWVRQAPGQGLEWIGRINPNSGN
TNYAQKFQGRVAMTRDTSISTAYMELRSLRSEDTATYYCGE
>V230RF-ABGA01360478.1-ighv |(1164, 1473)|2.98059608|(0.990,0.991,1.000)|-1
AHSQVQLVQSGAEVKKPGASVKFSCKASGYTFTDYFMHWMLQAPGQRLEWMGWISAGNGN
TKYSQKFQGRVTITRDTSASTAYMELSSLRSEDTAVYYCVR
>V231RF-ABGA01360480.1-ighv |(4035, 4344)|2.9889000027|(0.996,1.000,0.993)|-1
VLSQVQLQESGPGLVKPLETLSLTCAVSGGSISSSNWWSWVRQPPGKGLEWIGEIYQSGS
TNYNPSLKSRVTISVDKSKNQFSLKLSSVTAADTAVYYCAR
>V0RF-CABD02043817.1-igkv |(3028, 3328)|2.99899600001|(1.000,0.999,1.000)|1
ARCDIQMTQSPSSLSASVGDRVTITCQASQGISNNLNWYQQKPEKTPKLLIYAASSLQSG
IPSRFSDSGSGTDYTLTISSLQPEDFATYYCQQSDSTP
>V1RF-CABD02105556.1-trav |(1379, 1688)|2.0661715477|(0.887,0.910,0.582)|1
TIMYLVIGTAGQSLEQPSEVTAVEGATVQINCTYQTSGFYGLSWYQQHDGGAPTFLSYNA
LDGLEETGHFSSFLSRSDSYGYLLLQELQMRDSASYFCAVR
>V2RF-CABD02105568.1-trav |(17605, 17902)|2.9059022717|(0.991,0.930,1.000)|1
GLRAQSVAQPEDQVTVAEGNPLTVKCTYSVSGNPYLFWYVQYPNKGLKFLLKYITGDNLV
KGSYGFEAEFNKSQTSFHLKKPSALVSDSALYFCAVR
>V3RF-CABD02105570.1-trav |(17984, 18274)|2.99196000066|(0.998,0.999,0.995)|1
MSRGEDVEQSLFLSVQEGDSSIIKCTYTDSSSTYLYWYKQEPGAGLQLLMYIFSNMDMKQ
DQRLTVLLNKKDKHLSLRIADTQTGDSAIYFCAES
>V4RF-CABD02105575.1-trav |(937, 1225)|2.74122896022|(0.881,0.922,1.000)|1
VKSQKIEQNSEALNIQEGKTATLTCNYTNYSPAYLQWCRQDPGRGPVFLLLIRENEKEKR
KERLKVTFDTTLKQSLFHITASQPADSATYLCAL
>V5RF-CABD02105579.1-trav |(4709, 5003)|3.0|(1.000,1.000,1.000)|1
GINGDSVVQTEGQVLLSEGDSLIVNCSYETTQYPSLFWYVQYPGEGPQLLLKAMKANDKG
RNKGFEATYHKETTSFHLEKDSVQESDSAVYFCALS
>V6RF-CABD02105581.1-trav |(5845, 6138)|2.9771523093|(0.996,0.982,1.000)|1
GSGKNQVEQSPQSLIILEGKNCTLRCNYTVSPFNNLRWYKQDTGRGPVSLTIMTFSENTK
SNGRYTATLDADTKQSSLHITASQLSDSASYICVVS
>V7RF-CABD02105584.1-trav |(2822, 3110)|3.0|(1.000,1.000,1.000)|1
VWSQRKEVEQDPGPFNVPEGATVAFNCTYSNSASQSFFWYRQDCRKEPKLLMSVYSSGNE
DGRFTAQLNRASQYISLLIRDSQLSDSATYLCAV
>V8RF-CABD02105586.1-trav |(1660, 1957)|2.98896000066|(0.997,0.994,0.998)|1
GTRAQSVTQLDSHVSVSEGTPVLLRCNYSSSYSPSLFWYVQHPNKGLQLLLKYTSRATLV
KGINGFEAEFKKSETSFHLTKPSAHMSDAAEYFCAVS
>V9RF-CABD02105588.1-trbv |(5783, 6073)|1.87606753711|(0.636,0.583,0.674)|1
VNGENVEQHPSTLSVQEGDSAVIKCTYSDSASNYFPWYKQELGKGPQLLIDIRSNVGEKK
DQGITVTLNKTAKHFSLHITETQPEDSAVYFCAAS
>V10RF-CABD02105588.1-trav |(25116, 25407)|2.99798400013|(1.000,1.000,0.998)|1
VWSQQKEVEQNSGPLSVPEGAIASLNCTYSDRRSQSFFWYRQYSGKSPELIMSIYSNGDK
EDGRFTAQLNKASQYVSLLIRDSQPSDSATYLCAV
>V11RF-CABD02105589.1-trav |(20536, 20829)|2.99593600205|(1.000,0.996,1.000)|1
VSRGESEGLHLPTLSVQEGDNSIINCAYSNSASDYFIWYKQESGKGPQFIIDIRSNMDKR
QGQRVTVLLNKTVKHLSLQIAATQPGDSAVYFCAEN
>V12RF-CABD02105589.1-trav |(26461, 26764)|2.99798400013|(1.000,0.998,1.000)|1
PGIAQKITQTQPGMFMQEKEAVTLDCTYDTSDQSYGLFWYKQPSSGEMIFLIYQGSYDQQ
NATEGRYSLNFQKARKSANLVISASQLGDSATYFCAMRE
>V13RF-CABD02105590.1-trav |(3574, 3868)|3.0|(1.000,1.000,1.000)|1
RTRGDSVTQMEGPVTLSEEAFLTINCTYTATGYPSLFWYVQYPGEGLQLLLKATKADDKG
SNKGFEATYHKETTSFHLEKDSVQASDSAVYFCALS
>V14RF-CABD02105592.1-trav |(17384, 17677)|2.99899600001|(1.000,1.000,0.999)|1
VWSQQKEVEQDPGPLSVPEGAIASLNCTYSNSAFQYFMWYRQYSRKGPELLMYTYSSGNK
EDGRFTVQVDKSSKYISLFIRDSQPSDSATYLCAMS
>V15RF-CABD02105596.1-trav |(11716, 12003)|3.0|(1.000,1.000,1.000)|1
VNSQQGEEDPQALSIQEGENATMNCSYKTSINNLQWYRQNSGRGLVHLILIRSNEREKHS
GRLRVTLDTSKKSSSLLITASRAADTASYFCATD
>V16RF-CABD02105598.1-trdv |(2122, 2425)|2.99698000014|(1.000,0.998,0.999)|1
SSMAQKVTQTQNEISVVEKEDVTLDCVYETRDTTYYLFWYKQPPSGELVFLVRQNSFDEQ
NEISGRYSWNFQKSTSSFNFTITASQVVDSAVYFCALSE
>V17RF-CABD02105602.1-trav |(5884, 6171)|3.0|(1.000,1.000,1.000)|1
LSGEDQVTQSPEALRLQEGESSSLNCSYTVSGLRGLFWYRQDPGKGPEFLFTLYSAGEEK
EKERLKATLTKKESFLHITAPKPEDSATYLCAVQ
>V18RF-CABD02105602.1-trav |(17805, 18104)|2.99398000014|(0.999,0.998,0.997)|1
VSSKQEVTQIPAALSVPEGENLVLNCSFTDSAIYSLQWFRQDPGKGLTSLLLIQSSQREQ
TSGRLNASLDKSSGHSTLYIAASQPGDSATYLCAVRHS
>V19RF-CABD02105605.1-trav |(10343, 10640)|2.13025263291|(0.820,0.698,0.714)|1
VRGIQVEQSPPDLILQEGANSTLRCNFSDSVNNLQWFHQNPWGQLINLFYIPSGTKQNGR
LSATTVATERYSLLYISSSQTTDSGVYFCAVEPQCSP
>V20RF-CABD02105611.1-trdv |(4032, 4332)|2.99389600501|(1.000,0.995,0.999)|1
SSVAQKVTQAQSSVSTSVRKAVTLNCLYETSQWSYYIFWYKQLPSKEMIFLIRQGSAEQN
AKSGRYSVNFKKAAKSVALTISALQLEDSAKYFCALWE
>V21RF-CABD02105612.1-trav |(1576, 1866)|2.86315457633|(0.991,0.907,0.993)|1
VNSILNVEQSPQSLHVQEGDSTNFTCSFPSSNFYALHWYRWETAKSPEALFVMTLNGDEK
KKGRISATLNTKEGYSYLYIKGSQPEDSATYLCAF
>V22RF-CABD02105614.1-trav |(2102, 2401)|2.90664161214|(0.993,0.998,0.931)|1
VNGQQVMQIPQYQHVQEGEDFTTYCNSSTTLSNIQWYKQRPGGHPVFLIQLVKNGEVKKQ
KRLTFQFGEAKKNSSLHITATQTTDVGTYFCAGHSAPQ
>V23RF-CABD02105615.1-trav |(7807, 8097)|2.99899600001|(1.000,1.000,0.999)|1
TIIDAKTTQPTSMDCAEGRAANLPCNHSTISGNEYVYWYRQIHSQGPQYIIHGLKNNETN
EMASLIITEDRKSSTLILPHATLRDTAVYYCIVRV
>V24RF-CABD02105616.1-trav |(38647, 38934)|2.83812618092|(0.975,0.895,0.995)|1
VRSQQPVQTPQAMILREGEDAVINCSSSKALYSVHWYRQKHGEAPVFLMILLKGGEQKGH
DKISASFNEKKQQSSLYLMASQLSYSGTYFCGAE
>V25RF-CABD02105623.1-trav |(10762, 11052)|1.72806448104|(0.594,0.612,0.991)|1
VSSEDKVVQSPLSLVVHEGDTVTLNCSYEVTNFRSLLWNKQEKKAPTFLFMLTSSGIEKK
SGRLSSILDKKELFSILNITATQTRDSAIYLCAVE
>V26RF-CABD02105626.1-trdv |(13262, 13563)|2.92222221922|(0.999,1.000,0.938)|1
SGTAQTVTQSQPEMSVQEAETVTLSCTYDTSESNYYLFWYKQPPSRQMILVIRQEAYKQQ
NATENRFSVNFQKAAKSFSLKISDSQLGDTAMYFCAFM
>V27RF-CABD02105626.1-trav |(22480, 22780)|3.0|(1.000,1.000,1.000)|1
FSMAQTVTQSQPEMSVQEAETVTLSCTYDTSESDYYLFWYKQPPSRQMILVIRQEAYKQQ
NATENRFSVNFQKAAKSFSLKISDSQLGDAAMYFCAYR
>V28RF-CABD02105628.1-trav |(15554, 15842)|2.99899200002|(0.999,1.000,1.000)|1
LSGELKVGQNPLFLSTQEGKNYTIYCNYSTTSDRLYWYKQDPGKSLESLFVLLSNGAVKQ
EGRLMASLDTKARLSSLHITAAVHDLSATYFCAV
>V29RF-CABD02105628.1-trav |(26467, 26757)|1.84547034192|(0.581,0.650,0.655)|1
GTSSNSVKQMGQITVSEGASVTMNGTYTSTGYPTLFWYVQYPSKPLQLLQRETMENSKNF
GGGNIKDKNSPIVKYSVQVSDSAMYYCLLGDTVLK
>V30RF-CABD02105628.1-trav |(32227, 32513)|1.86953617155|(0.618,0.669,0.595)|1
VSAAKNEVEQSPQDLTAQEGEFITINCSYSVGISVLHWLQQYPGGGIVSLFMLSSGKKKH
GRLIATINIQEKHSSLHITASHPRDSAIYICAV
>V31RF-CABD02136297.1-ighv |(2232, 2554)|2.801228024|(0.978,0.898,0.953)|1
VLSQVTLKESGPVLVKPTEILTLTCTLSGFSLSTSGMGMSWIRQPPGKALEWLAHIFSND
KKSYSTSLKNRLIISKGTSKSQVVLTMTNMDPVDTATYYCAWRAQ
>V32RF-CABD02136313.1-ighv |(4960, 5275)|2.47626781106|(0.799,0.997,0.829)|1
VQCEVQLVESGGGLVQPGGSLRLSCAASGFTFSNIWMSWVRQALGKGLEWVGCIKSKANG
GTTDYTAPVKGRFTISRDDSKNTLYLQMNSLKTEDTAVYHCTT
>V33RF-CABD02136332.1-ighv |(9347, 9656)|3.0|(1.000,1.000,1.000)|1
AHSQVQLVQSGAEVKKPGASVKVSCKASGYTFTSYYMHWVRQAPGQGLEWMGIINPSGGS
TSYAQKFQGRVTMTRDTSTSTVYMELSSLRSEDTAVYYCAR
>V34RF-CABD02136430.1-ighv |(38815, 39121)|3.0|(1.000,1.000,1.000)|1
VQCEVHLVQSGGGLVQPGGSLRLSCAGSGFTFSSHAMHWVRQAPGKGLEWVSAIGTGGGT
YYADSVKGRFTISRDNAKNSLYLQMNSLRAEDMAVYYCAR
>V35RF-CABD02196505.1-igkv |(9143, 9461)|2.91674160714|(0.998,0.936,0.998)|1
AYGDIVMTQSPESLAVSLGERVTINCKSSQSVLYSSNNKNYLAWYQQKPGQAPKLLIYWA
STRQSGVPDRFSGSGSGTDFTLTISSLQAEDVAVYYCQQYYSTP
>V36RF-CABD02196508.1-igkv |(2277, 2565)|2.94836527997|(0.991,0.971,0.988)|1
TTLTQSPAFVSATPGDKVTISCKASQDIDDDMNWYQQKPGEAAIFIIQEATTLVSGIPPR
FSGSGYGTDFTLTINNIESEDAAYYFCLQDDNFP
>V37RF-CABD02196554.1-igkv |(8457, 8757)|2.99899200002|(0.999,1.000,1.000)|1
ARCDIQLTQSPTSLSASVGDRVTITCQASQGISNNLAWYQQKPGKVPKLLIYSASSLQSG
VPSRFSGSGSGTDFTRTISSLQPEDVATYYCQRTYNAP
>V38RF-CABD02196563.1-igkv |(2290, 2590)|3.0|(1.000,1.000,1.000)|1
ARCDIQMTQSPSSLSASVGDRVTITCRASQGISSWLAWYQQKPGKAPKLLIYAASSLESG
VPSRFSGSGSGTDFTLTISSLQPEDFATYYCQQANSFP
>V39RF-CABD02196568.1-igkv |(5046, 5361)|2.96820529852|(0.999,0.992,0.979)|1
SSADIVMTQTPLSLPVTPGQPASISCKSSQSLLHSDGKTYLYWYLQKPGQSPQLLIYEVS
NRASGVPDRFSGSGSGTDFTLKISRVEAEDVRVYYCMQGIQLP
>V40RF-CABD02196577.1-igkv |(8821, 9136)|2.91258947566|(0.982,0.949,0.986)|1
SSGDIVMTQTPLSLPVNPGQLASISCRSSQSLLHSNGYTYLHWYLQKPGKSPQLLIYRVS
SHFSGVPDRFSGSGSGSDFTLKISWVEAEDVGVYYCMQATQFP
>V41RF-CABD02196578.1-igkv |(13447, 13733)|2.60689749627|(0.934,0.868,0.850)|1
FLSVTPGEKVTITCQASEGIGNYLYWYQQKPDQAPKLLIKYASQSISGVPSRFSGSGSGT
DSGSGSGTDFTFAISSLEAEDAATYYCQQGNKH
>V42RF-CABD02196586.1-igkv |(1073, 1373)|3.0|(1.000,1.000,1.000)|1
ARCDIQMTQSPSSVSASVGDRVTITCRASQGISNSLNWYQQKPGKAPRLLIYDASSLESG
VPSRFSGSGSGTDFTLTISSLQPEDFATYYCQQFNSYP
>V43RF-CABD02196587.1-igkv |(1282, 1582)|3.0|(1.000,1.000,1.000)|1
ARCAIQMTQSPSSLSASVGDRVTITCRASQGISSYLAWYQQKPGKAPKLLIYYASSLQSG
VPSRFSGSGSGTDYTLTISSLQPEDFATYYCQQHSSTP
>V44RF-CABD02196588.1-igkv |(1835, 2135)|2.99798400013|(1.000,1.000,0.998)|1
TTGEIVMTQSPATLSVSPGERATLSCRASQSVSSYLAWYQQKPGQAPRLLIYGASNRATG
IPARFSGSGSGTDFTLTISSLEPEDFAVYYCQQYNNWS
>V45RF-CABD02196595.1-igkv |(5365, 5665)|3.0|(1.000,1.000,1.000)|1
ARCAIRMTQSPSSLSASTGDRVTITCRASQGISSYLAWYQQKPGKAPKLLIYAASTLQSG
VPSRFSGSGSGTEFTLTISCLQSEDFATYYCQQYYSYP
>V46RF-CABD02199693.1-igkv |(2056, 2356)|3.0|(1.000,1.000,1.000)|1
ARCDIQVTQSPSSLSASVGDRVTITCRASQGISNELSWYQQKPGQAPTLLIYAASSLQSG
VPSRFSGSGSGTDFTLTISSLQPEDIATYYCLQDYTTP
>V47RF-CABD02231299.1-iglv |(4157, 4463)|2.98974003277|(0.999,1.000,0.991)|1
DSQTVVTQEPSFSVSPGGTVTLTCGLSSGSVSTSYYPSWYQQTPGQAPRMLIYSTNTRSS
GVPDRFFGSIIGNKAALTITGAQADDESDYYCVLYMGSGI
>V48RF-CABD02231313.1-iglv |(1017, 1323)|1.77305936152|(0.877,0.585,0.708)|1
SLSQPVLTQSSSASASLGSSVKLTCTLSSGHSSYIIAWQQQQPGKAPRYLMRLEGSGSYN
KGNGIPDRFSGSSSGADRYLTISNLQSEDEADYYCQTWDS
>V49RF-CABD02231318.1-iglv |(3555, 3862)|2.994900005|(1.000,1.000,0.995)|1
SWANFMLTQPHSVSESPGQTVTISCTRSSGSIASNYVQWYQQRPGSAPTTVIYEDNQRPS
GVPDRFSGSIDSSSNSASLTISGLKTEDEADYYCQSYDSS
>V50RF-CABD02231359.1-iglv |(5556, 5865)|3.0|(1.000,1.000,1.000)|1
SWAQSVLTQPPSVSAAPGQKVTISCSGSSSNIGNNYVSWYQQLPGTAPKILIYDNNKRPS
GISDRFSGSKSGTSATLGITGLQTGDEADYYCGTWDSSLSA
>V51RF-CABD02231360.1-igkv |(15331, 15617)|1.55016186285|(0.476,0.600,0.565)|1
SLSQPVLTQPPSASASLGASVTLTCPLSSGYSNYKVDWYQQRPGKGPRFVMRVGTSGIVG
SKGDGIPDRFSVLGSGLNRYLTIKNIQEEDESD
>V52RF-CABD02231360.1-iglv |(25045, 25355)|2.74979547493|(0.995,0.844,0.998)|1
SLSQPVLTQPTSLSASPGASARLTCTLRSGINLGTYRIYWYQQKPGSPPRYLLNYYSDSD
KHQGSGVPSRFSGSKDASTNAGILVISGLQSEDEADYYCMI
>V53RF-CABD02231362.1-iglv |(1583, 1892)|3.0|(1.000,1.000,1.000)|1
SWAQSVLTQPPSASGTPGQRVTISCSGSSSNIGSNTVNWYQQLPGTAPKLLIYDNNKRPS
GVPDRFSGSKSGTSASLAISGLRSEDEADYYCAAWDDSLNG
>V54RF-CABD02231364.1-iglv |(18770, 19079)|3.0|(1.000,1.000,1.000)|1
SWAQSVLTQPPSASGTPGQRITISCSGSSSNIGSNTVNWYQQLPGTAPKLLIYDNNKRPS
GVPDRFSGSKSGTSASLAISGLQSEDEADYYCAAWDDSLNG
>V55RF-CABD02231389.1-iglv |(9106, 9409)|1.72815858618|(0.834,0.737,0.520)|1
SWAQSALTQPPFVSRAPGQSVTISCTGTSSDVGDYDHVFWYQKRLSTTSRLLIYNINTRP
SGISDLFSGSKSGNVASLTISGLKSEVEANYHCSLYSSS
>V56RF-CABD02231410.1-iglv |(1308, 1605)|2.99899200002|(0.999,1.000,1.000)|1
SVASYELTQPSSVSVSPGQTARITCSGDVLAKNYAGWYQQKPGQAPVLVIYKDSERPSGI
PERFSGSSSGTTVTLTISGAQVEDEADYYCYSAADNN
>V57RF-CABD02231415.1-iglv |(2745, 3048)|2.99385601037|(1.000,0.994,1.000)|1
SEASYELTQPPSVSVSLGQTARITCSGEELPKKYAYWYQQKPGQSPVLVIYKDSERPSGI
PERFSGSSSGTTVTLTISGVQAEDEADYYCLSADSSDTY
>V58RF-CABD02231416.1-iglv |(14948, 15251)|2.13316810716|(0.922,0.955,0.600)|1
SVTSYELTQPPSVSVAPGQAARITCGGNNIGSKSVHWYQQKPGQAPVLVIYYDSDWPSGI
PERFSGSNSGNTATLTISRVEAGDEADCYCQVWDSSSKH
>V59RF-CABD02231416.1-iglv |(22863, 23166)|2.93795283525|(0.995,0.953,0.997)|1
SVVSSELTQDPAVSVALGQTVRITCQGDSLRSYYASWYQQKPGQVPVLIIYGKNNRPSGI
PDRFSGSSSGNTASLTITGAQEEDEADYYCNSWDSSGNH
>V60RF-CABD02231419.1-iglv |(2003, 2306)|2.99696400065|(1.000,1.000,0.997)|1
SWAQSALTQPPSVSGSPGQSVTISCTGTSSDIGGYNRASWYQQHPGKAPKLMIYEVSKRP
SGVSNRFSGSKSGNTASLTISGLQAEDEADYYCSSYTSS
>V61RF-CABD02231421.1-iglv |(1448, 1751)|2.994900005|(1.000,1.000,0.995)|1
SWAQSALTQPASVSGSPGQSITISCTGTSSDVGGYNYVSWYQQHPGKAPKLMIYYVSNRP
SGVSNRFSGSKSGNTASLTISGLQAEDEADYYCSSYTSS
>V62RF-CABD02231422.1-iglv |(7425, 7728)|2.99593600205|(1.000,0.996,1.000)|1
SATSYELTQPHSVSVATAQTARITCGGNNIGSKAVHWYQQKPGQDPVLVIYSDSNRPSGI
PERFSGSNSGNTATLTISRIEAGDEADYYCQVWDSSSDH
>V63RF-CABD02231427.1-iglv |(14063, 14366)|2.99899600001|(1.000,0.999,1.000)|1
SEASYELTQSPSVSVSPGQTARITCSGDALPKKYAYWYQQKPGQAPVLVIYEDSKQPSGI
PERFSGSSSGTMATLTISGAQVEDEADYYCYSTDSSGNH
>V64RF-CABD02231427.1-iglv |(25067, 25377)|2.90982792659|(0.988,1.000,0.934)|1
SWAQSALIQPPSASGSPGQSVTISCTGTSSDIGGYNYVSWYQRHPGKAPKLMIYEVSNRP
SGVPNRFSGSKSGNTASLTISGLQAEDEADYYCCSYAGSNN
>V65RF-CABD02231431.1-iglv |(3583, 3879)|3.0|(1.000,1.000,1.000)|1
SVASYELTQPPSVSVSPGQTASITCSGDKLGDEYAYWYQQKPGQSPVLVIYQDSKRPSGI
PERFSGSNSGNTATLTISGTQAMDEADYYCQAWDSST
>V66RF-CABD02352478.1-trbv |(1118, 1418)|2.23486677938|(0.997,1.000,0.639)|1
LTEPEVTQTPSHQVTQMGQEVILRCVPISNHLYFYWYRQILGQKVEFLVSFYNNKISEKA
EIFDDQFSVERPDGSNFTLKIRSTKLEDSAMYFCASSE
>V67RF-CABD02352480.1-trbv |(136, 449)|2.98651211712|(0.999,1.000,0.988)|1
PIDTEVTQTPKHLVMGMTNKKSLKCEQHMGHRAMYWYKQKAKKPPELMFVYSYEKLSVNE
SVPSRFSPECPNNSLLNLHLHALQPEDSALYLCASSQDTALQ
>V68RF-CABD02352480.1-trbv |(7988, 8284)|2.80104052678|(0.998,0.921,0.926)|1
PVEAGVTQTPRYLIKTRGQQVTLSCSPISGHRSVSWYQQTLGQGLQFLFEYFGETQRNKG
NFPGRFSGRQFSNSRSEMNVSTLELGDSALYLCASSL
>V69RF-CABD02352482.1-trbv |(248, 545)|2.9958720041|(0.996,1.000,1.000)|1
PVNAGVAQTPKFQVLKTGQSMTLQCAQDMNHNSMYWYRQDPGMGLRLIYYSAAEGTTAKG
EVPDGYNVSRLNKREFSLRLESAAPSQTSVYFCASSE
>V70RF-CABD02352488.1-trbv |(3197, 3494)|2.99798400013|(1.000,1.000,0.998)|1
PVNAGVTQTPKFHVLKTGQSMTLLCAQDMNHEYMYWYRQDPGMGLRLIHYSVGEGTTAKG
EVPDGYNVSRLKKQNFLLGLESAAPSQTSVYFCASSY
>V71RF-CABD02352491.1-trbv |(2383, 2680)|3.0|(1.000,1.000,1.000)|1
PLDTAVSQTPKYLVTQMGKKESLKCEQNLGHNAMYWYKQDSKKFLKTMFIYSNKEPILNE
TVPNRFSPDSPDKAHLNLHINSLELGDSAVYFCASSQ
>V72RF-CABD02352492.1-trbv |(775, 1088)|2.9338228881|(0.999,1.000,0.946)|1
PMEMGVTQTPRHLVMGMTNKKSLKCEQHLGHNAMYWYKQSAKKPLELMFVYSLEERVENN
SVPSRFSPECPNSSHLFLHLHALQPEDSALYLCASSQDTALQ
>V73RF-CABD02352493.1-trbv |(4882, 5179)|2.98878801933|(0.998,1.000,0.991)|1
PVDAGVTQTPKFQVLKTGQSMTLQCAQDMNHNYMYWYRQDPGKGLRLIHYSAGEGTTAKG
EVPDGYNVSRLNTQNFLLRLELAARSQTSVYFCATSE
>V74RF-CABD02352494.1-trbv |(447, 747)|2.988900005|(0.998,0.998,0.993)|1
HTRAGVSQSPSNKVTEKGKDVVFRCDPISGHSVLYWYQQSLGQGLEFLIYFQGNSAPDKS
GLPSDRFSAERTGGSVSTLTIQRTQQEDSAMYLCASSL
>V75RF-CABD02352498.1-trbv |(5308, 5605)|2.85697750543|(0.995,0.961,0.925)|1
PMIAGITQAPTSQILAAGRSMTLRCTQDMRHNAMYWYRQDLGLGLRLIHYSNTAGTTGKG
EVPDGYSVSRANTDDFPLMLASAVPSQTSVYFCASSD
>V76RF-CABD02352499.1-trbv |(1151, 1451)|2.99280401921|(1.000,1.000,0.993)|1
HTGAGVSQTPSNKVTEKGKDVELRCDPISGHTALYWYRQSLGQGPEFLIYFQGTGATDDS
GLPNDRFFAVRPEGSVSTLKIQRTEQGDSAVYLCASSL
>V77RF-CABD02352499.1-trbv |(5984, 6280)|2.32298620522|(0.853,0.717,0.827)|1
PVEAGATQSPTHLLKTRGQQVTLRCSPISGHSSVSWYQKAPGQGPQFIFEYANELRRLEG
NFPNRFSGRQFHDYRSEMNVSALELGDSALYLCARSL
>V78RF-CABD02352499.1-trbv |(8716, 9012)|2.99796800026|(0.998,1.000,1.000)|1
PVDSGVTQTPKHLITATGQRVTLRCSPRSGDLSVYWYQQSLDQGLQFLIQYYNGEERAKG
NILERFSAQQFPDSHSELNLSSLELGDSALYLCASSV
>V79RF-CABD02352499.1-trbv |(16726, 17023)|2.05465918253|(0.850,0.566,0.975)|1
HRDAEITQSPRHKITETGRQVTLACYQTWNHNNMFWYRQDLGHGLRLSHYSYGVQDTNKG
EVSDGCSVSRSNTEDFPLTLESAASSQTSVYFCASSE
>V80RF-CABD02352501.1-trbv |(6663, 6963)|2.13407918266|(0.811,0.630,0.816)|1
CTDPGIIQSPKHEVTEMGQTVTLRCEPIFGHNLLFWYRETFVQGLELLSYFRSRSIIDNA
GMPTDRFSAERPDGSFSTLKIQPAEQGDSAVYVCASRL
>V81RF-CABD02352501.1-trbv |(16783, 17080)|2.98851611711|(1.000,1.000,0.989)|1
PVNAGVTQTPKFQVLKTGQSMTLQCAQDMNHDYMYWYRQDPGMGLRLIHYSVGAGITDKG
EVPNGYNVSRSNTEDFPLRLQSAAPSQTSVYFCASSY
>V82RF-CABD02352502.1-trbv |(788, 1088)|3.0|(1.000,1.000,1.000)|1
HTGAGVSQSPRYKVAKRGRDVALRCDSISGHVTLYWYRQTLGQGSEVLTYFRSDAQRDKS
GRPSGRFSAERPERSVSTLKIQRTEQGDSAVYLCASSL
>V83RF-CABD02352503.1-trbv |(2597, 2893)|2.99899600001|(1.000,0.999,1.000)|1
SVETGVTQSPTHLIKTRGQQVTLRCSPQSGHNTVSWYQQALGQGPQLIFQYYREEENGRG
NFSPRFSGRQFPNYSSELNVNALELDDSALYLCASSL
>V84RF-CABD02352508.1-trbv |(1078, 1374)|3.0|(1.000,1.000,1.000)|1
PVDAGVTQSPTHLIKTRGQQVTLRCSPQSGHNTVSWYQQALGQGPQFIFEYYEKEERGRG
NFPDRFSARQFPNYSSELNVNALLLGDSALYLCASSL
>V85RF-CABD02352508.1-trbv |(6352, 6643)|1.8491505656|(0.640,0.627,0.592)|1
NAGVTQTPKFHVVKTGQSMTLLCAQDMNHEYMYRYRQDPGKGLRLIYYSVAAALTDKGEV
PNGYNVSRSNTEDFPLKLESAAPSQTSVYFCGSSY
>V86RF-CABD02352509.1-trbv |(2773, 3083)|2.03064770014|(0.904,0.974,0.556)|1
HTGAGVSQAPRFKVTKRGQDVALRCDPISGHVALYWYRQALGQGPEFLTYFNDEAQPDKS
GMPNDRFSAERPEGSISTLTIQRTEQRDSAMYLCASSLARA
>V87RF-CABD02352509.1-trbv |(10643, 10939)|2.99799200002|(1.000,0.999,0.999)|1
LVDAGVTQSPTHLIKTRGQQVTLRCSPKSGHDTVSWYQQALGQGPQFIFQYYEEEERQRG
NFPDRFSGHQFPNYSSELNVNALLLGDSALYLCASSL
>V88RF-CABD02352510.1-trbv |(11938, 12229)|2.98560803841|(1.000,0.993,0.993)|1
NAGVTQTPKFHILKTGQSMTLQCAQDMNHGYMSWYRQDPGMGLRLIYYSAAAGTIDKGEV
PNGYNVSRLNTEDFLLRPVSAAPSQTSVYFCASSY
>V89RF-CABD02352511.1-trbv |(3159, 3459)|3.0|(1.000,1.000,1.000)|1
HTGAGVSQSPRYKVTKRGQDVTLRCDPISSHATLYWYQQALGQGPEFLTYFNYEAQPDKS
GLPNDRFSAERPEGSNSTLTIQRTEQRDSAMYLCASSL
>V90RF-CABD02352511.1-trbv |(16331, 16627)|2.88644684157|(0.990,0.996,0.920)|1
PVDAGVTQSPTHLIKMRGQQVTLRCSPKSGHDTVSWYQQALGQGPQFIFEYYEKEERGRG
NFPDRFSARQFPNYSSELNVNPLLMGDSALYLCASSL
>V91RF-CABD02352511.1-trbv |(25598, 25898)|3.0|(1.000,1.000,1.000)|1
HADTGVSQDPRHKITKRGQNVTFRCDPISEHNQLYWYRQTLGQGPEFLTYFQNEAQLEKS
RLLSDRFSAERPKGSFSTLEIQRTEQGDSAMYLCASSL
>V92RF-CABD02352512.1-trbv |(835, 1135)|3.0|(1.000,1.000,1.000)|1
HADTGVSQDPRHKITKRGQNVTFRCDPISEHNQLYWYRQTLGQGPEFLTYFQNEAQLEKS
RLLSDRFSAERPKGSFSTLEIQRTEQGDSAMYLCASSL
>V93RF-CABD02352512.1-trbv |(7390, 7687)|2.98974003277|(0.999,0.991,1.000)|1
SVAAGVIQSPRHLIKEKRETATLKCYPIPRHDTVYWYQQGPGQDPQFLISFYEKMQSDKG
SIPDRFSAQQFSDYHSELNMSSLELGDSALYFCASSL
>V94RF-CABD02352513.1-trbv |(1353, 1650)|3.0|(1.000,1.000,1.000)|1
HMDAGITQSPRHKVTEIGTPVTLRCHQTENHRYMYWYRQDPGHGLRLIHYSYGVKDTDKG
EVSDGYSVSRSKTEDFLLTLESATSSQTSVYFCAISE
>V95RF-CABD02352514.1-trbv |(8741, 9041)|3.0|(1.000,1.000,1.000)|1
LIEAGVVQSPRYKIIEKKQPVAFWCNPISGHNTLYWYRQNLGQGPELLIRYENEEAVDDS
QLPKDRFSAERLKGVDSTLKIQPAELGDSAVYLCASSL
>V96RF-CABD02352514.1-trbv |(14343, 14643)|3.0|(1.000,1.000,1.000)|1
HTDAGVIQSPRHEVTEMGQEVTLRCKPISGHNSLFWYRQTMMRGLELLIYFNNNVPIDDS
GMPKDRFSAKMPNASFSTLKIQPSEPRDSAVYFCASSL
>V97RF-CABD02352515.1-trbv |(2177, 2477)|2.99696400065|(1.000,1.000,0.997)|1
HTDAGVIQSPRHEVTEMGQEVTLRCKPISGHNSLFWYRQTMMRGLELLIYFNNNVPIDDS
AMPKDRFSAKMPNASFSTLKIQPSEPRDSAVYFCASSL
>V98RF-CABD02352519.1-trbv |(5895, 6195)|1.9241714452|(0.944,0.989,0.517)|1
LTDAGVTQTPRHKVTEMGQEVTMRCQPILGHNTVFWYRQTMMQGLELLAYFRNRDPLDDS
GMPKDRFSAEIPDATLATLKIQPSGPRDSAVYFCASGL
>V99RF-CABD02352520.1-trbv |(3657, 3957)|2.99280401921|(1.000,0.993,1.000)|1
HIEAGVTQFPSHSVIEKGQTVTLRCDPISGHDNLYWYRRVMGKEIKFLLHFVKESKQDES
GMPNNRFLAERTGGTYSTLKVQPAELEDSGVYFCASSQ
>V100RF-CABD02352520.1-trbv |(8783, 9080)|2.84973453214|(0.979,0.964,0.921)|1
HGDAMVIQNPRYQVTQFGKPVTLSCSQNLNHNIMYWYQQKSSQAPKLLFHYYDKDFNNEA
DTPDNFQSRRPNTSFCFLDISSPGLGDAAMYLCATSR
>V101RF-CABD02352525.1-trbv |(5450, 5746)|2.99392000218|(1.000,0.996,0.998)|1
LSNAGVMQNPRHLVRRRGQEARLRCSPMKGHSHVYWYRQLPEEGLKFMVYLQKENIIDES
GMPKERFSAEFPKEGPSILRIQQAVRGDSAAYFCASS
>V102RF-CABD02352526.1-trbv |(2325, 2622)|3.0|(1.000,1.000,1.000)|1
TVDGGITQSPKYLFRKEGQNVTLNCEQNLNHDAMYWYRQDPGQGLRLIYYSQIVNDFQKG
DIAEGYSVSREKKESFPLTVTSAQKNPTAFYLCASSI
>V103RF-CABD02352526.1-trbv |(20182, 20482)|2.89992541189|(0.996,0.987,0.933)|1
STDTKVTQRPRLLVKASEQKAKMDCVPIKGHSYVYWYRKKLEEELKFLVYFQNEEIIQKA
EIINERFLAQCSKNSSCTLEIQSTESGDTALYFCASSK
>V104RF-CABD02352526.1-trbv |(29242, 29542)|2.99280401921|(1.000,1.000,0.993)|1
SFHAKVTQTPGHLVKGKGQKTKMDCTPEKGHTFVYWYQQNQNKEFMLLISFQNEQVLQET
EMHKKRFSSQCPSNTPCSLAILSSEPGDTALYLCASSQ
>V105RF-CABD02352529.1-trbv |(2516, 2814)|2.89807219335|(0.994,0.998,0.925)|1
SMDADVTQTPRNRITKTGKRIMLECSQTKGHDRMYWYRQDPGLGLRLIYYSFDVKDINKG
EISDGYSVSRQAQAKFSLSLESATPNQTALYFCATSD
>V106RF-CABD02352529.1-trbv |(16657, 16954)|2.7523576557|(0.976,1.000,0.845)|1
LMEADIYQTPRYLVIGTGKKITLECSQTMGHDKMYWYQQDPGMELHLIHYSYGVNSTEKG
GLSSESTVSRIRTEHFPLTLESARPSHTSQYLCASSE
>V107RF-CABD02352531.1-trbv |(24520, 24817)|2.99699200002|(0.999,1.000,0.998)|1
PLEAQVTQNPRYLITVTGKKLTVTCSQNMNHEYMSWYRQDPGLGLRQIYYSINVEAIDKG
DVPEGYNVSRKEKRNFPLILESPSPNQTSLYFCASSL
>V108RF-CABD02352532.1-trbv |(6479, 6776)|2.99799600001|(0.999,1.000,0.999)|1
LVDVKVTQSSRYLVKRMGEKVFLECVQDMDHENMFWYRQDPGLGLRLIYFSSDVKMKEKG
DIPEGYSVSREKKERFSLILESTSTNQTSMYLCASSL
>V109RF-CABD02377004.1-trbv |(3098, 3398)|2.98896000066|(0.997,0.994,0.998)|1
SMDTKVTQRPRLLVKANEQKAKMDCVPIKRHSYVYWYHKTLEEELKFLIYFQNEEIIQKA
EIINERFSAQCPQNSPCTLEIQSTESGDTARYFCANSK
>V110RF-CABD02377004.1-trbv |(12039, 12339)|2.33223794651|(0.868,0.717,0.838)|1
CFHAKVTQTPGYLVKGKGRKTKMYCTPENGHTFVCWYQQNQNKEFMFLISFQNEQVLQET
EMHKKRFSPQCPKNPPCSLAILSSEPGDTALYLCASSP
>V111RF-CABD02377005.1-trbv |(21584, 21875)|2.97999600001|(0.993,0.994,0.993)|1
LMEAEIYQTPRYHVIGTGKKITLECSQTMGHDKMYWSRSRNGITPHPPFLWVNSTEKGDL
SSESTVSRIRIEHFPLTLESASPSHTSQYLCASSE
>V112RF-CABD02377030.1-trbv |(2304, 2607)|2.98178801933|(0.997,0.995,0.990)|1
SVFSAVISQKPSRDICQRGTSMTIQCQVNSQVTMMFWYCQQPGQSVTLIATANQGSEATY
ESGFVIDKFPISCPNLTFSTLTVSNRSPEDSSIYLCSVE
>V113RF-CABD02105639.1-trdv |(1838, 2144)|2.98974003277|(0.999,1.000,0.991)|-1
RGMLCDKVTQSSPDQTVASGSEVVLLCTYDTVYSNPDLFWYRIRPDYSFQFVFYGDNSGS
QAADFTQGRFSVKHILTQKAFHLVISPVRTEDSATYYCAF
>V114RF-CABD02117385.1-ighv |(3331, 3640)|3.0|(1.000,1.000,1.000)|-1
AHSQVQLVQSGAEVKKPGASVKVSCKASGYTFTGYAMHWVRQAPGQRLEWMGWINTGNGN
TKYSQKFQGRVTITRDTSASTAYMELSSLRSEDTAVYYCAR
>V115RF-CABD02117388.1-ighv |(2426, 2740)|1.79667702336|(0.923,0.630,0.706)|-1
VLSQITLKESGPTLVKPTQTLTLTCTFSGFSLSTSGTSVSWIRQPPGKALEWLAAIYSDD
DKRYSPSLKSRLTITKDTSKNQVVLTMTNMDPVDTATYYCAHR
>V116RF-CABD02117395.1-ighv |(10192, 10503)|2.99899600001|(1.000,1.000,0.999)|-1
VQCEVQLVESGGGLVQPGRSLRLSCVASGFTFDDYAMHWVRQAPGKGLEWVSGISWNSGS
TGYADSVKGRFTISRDNAKNSLYLQMNSLRAEDTALYYCAKD
>V117RF-CABD02117395.1-ighv |(23380, 23689)|2.96904987297|(0.997,0.999,0.975)|-1
VHSQVQLVQSGAEVRKPGSSVKVSCKLSGGTFSSYAISWVRQAPGQGLEWMGGFIPILGT
ANYAQKFQGRVTITADESTSTAYMELSSLRSEDTAVYYCAR
>V118RF-CABD02117398.1-ighv |(503, 809)|3.0|(1.000,1.000,1.000)|-1
VQCEVQLVESEGGLVQPGGSLRLSCAASGFTFSSYNMHWVRQAPGKGLEWVSAIGTGGDT
YYPGSVKGRFTISRENAKNSLYLQMNSLRAEDTAVYYCAR
>V119RF-CABD02117416.1-ighv |(7584, 7893)|3.0|(1.000,1.000,1.000)|-1
VQCEVQLVESGGGLVQPGGSLRLSCAASGFTFSDYYMSWVRQAPGKGLEWVSGINWNGGS
TGYADSVKGRFTISRNNAKNSLYLQMNSLRAEDTALYYCAR
>V120RF-CABD02117419.1-ighv |(907, 1216)|3.0|(1.000,1.000,1.000)|-1
VQCEVQLVESGGGLVKPGGSLRLSCAASGFTFSSYWMSWVRQAPGKGLEWVSVISSSGRT
TYYADSVKGRFTISRDNAKNSLYLQMNSLRAEDTAVYYCAR
>V121RF-CABD02117420.1-ighv |(2703, 3012)|3.0|(1.000,1.000,1.000)|-1
VQCDVQLVESGGGLVQPGGSLRLSCAASGFTFSSYGMSWVRQAPGKGLEWVSYISSSSSY
IYYADSVKGRFTISRDNAKNSLYLQMNSLRAEDTAVYYCAR
>V122RF-CABD02117421.1-ighv |(1503, 1818)|3.0|(1.000,1.000,1.000)|-1
AQCEVQLVESGGGLVKPGGSLRLSCAASGFTFSNYYMEWVRQAPGKGLEWVGFIRTKAKG
GTTEYAASVKGRFTISRDDSKSIAYLQMNSLKTEDTAVYYCTR
>V123RF-CABD02117430.1-ighv |(2094, 2408)|2.87067958581|(0.998,0.927,0.969)|-1
VLSQVTLKESGPVLVKPTETLTLTCTVSGFSLSNARMGVSWIRQPPGKALEWLAHIFSND
EKSYSTSLKSRLTISKDTSKSQVVLTMTNMDPVDTATYYCAWI
>V124RF-CABD02117431.1-ighv |(1312, 1621)|2.997|(0.999,0.999,0.999)|-1
AHSQVQLVQSGSEVKKPGASVKVSCKASGYTFTSYGMNWVRQAPGQGLEWMGWINTYTGN
PTYAQGFTGRFVFSMDTSVSTAYLQISSLKAEDTAMYYCAR
>V125RF-CABD02117438.1-ighv |(419, 731)|2.91900449196|(0.977,0.995,0.951)|-1
VLSQVQLQQWGPGLVKPSETLSLTCAVYGGSISSSDYYWSWIRQPPGKGLEWIGLINYVR
STNYNPSLKSRVTISVDTSKNQFSLKLSSVTAADTAVYYCAR
>V126RF-CABD02117439.1-ighv |(2063, 2375)|2.97826023048|(0.996,0.983,1.000)|-1
VLSQVQLQQWGTGLVKPSETLSLTCAVYGGSISSDGYYWSWIRQPPGKGLEWIGYIYYSG
STYYNPSLKSRVTISVDTSKNQFSLKLSSVTAADTAVYYCAR
>V127RF-CABD02117442.1-ighv |(1416, 1725)|2.99899600001|(1.000,0.999,1.000)|-1
VQCQVQLVESAGGVVQPGRSLTLSCTASGFTFSSYGMHWVRQAPGKGLEWVAVISYDASN
KYYAASVKGRFTISRDNSKNTLYLQMNSLRAEDTAVYYCAK
>V128RF-CABD02117444.1-ighv |(7682, 7991)|3.0|(1.000,1.000,1.000)|-1
VQCQVQLVESGGGVVQPGRSLRLSCTASGFTFSSYGMHWVRQAPGKGLEWVAVISYDASN
KYYADSVKGRFTISRDNSKNTLYLQMNSLRAEDTAVYYCAK
>V129RF-CABD02117445.1-ighv |(8585, 8891)|2.90591671673|(0.987,0.985,0.942)|-1
VLSQVQLQQWGAGVVKPSETLSLTCAVYGGSFSGYYWNWIRQPPGKGLEWIGRISYDGST
NYNPSLKSRVTISVDTSKNQFSLKLSSVTAADTAVYYCAR
>V130RF-CABD02117454.1-ighv |(1407, 1716)|2.92051834815|(0.997,0.995,0.941)|-1
VLSQVQLQESGPGLVKPSETLSLTCVVSGGSISSSNWWSWVRQPPGKGLEWIGEIYHSGS
PNYNPSLKSRVTISVDKSKNQFSLKLSSVTATDTAVYYCAR
>V131RF-CABD02117457.1-ighv |(5100, 5407)|2.98521630725|(1.000,1.000,0.986)|-1
VQCEVQLVESGGGLVQPEGSLKLSCAASGFTFSSYAMDWVRQAPGKGLEWVAHIWNDGSQ
KYYADSVKGRFTISRDNSKSMLYLQMDSLKAEDTAMYYCT
>V132RF-CABD02117463.1-ighv |(7715, 8026)|2.89512485441|(0.997,1.000,0.921)|-1
VQCEVQLVESGGGVVQPGRSLRLSCAASGFTFDDYAMHWVRQAPGKGLEWVSRISWGGGS
TYYADSVKGLFTISRDNSKISLYLQMNSLRAEDTALYYCAKD
>V133RF-CABD02117467.1-ighv |(8162, 8468)|2.93450772085|(0.995,0.949,0.999)|-1
AQCEVQLVESGGGLVQPGGSLRPSCAASGFAFSSYVLHWVRRAPGKGLEWVSAIGTGGDT
YYADSVMGRFTISRDNAKKSLYLQMNSLIAEDMAVYYCAR
>V134RF-CABD02117467.1-ighv |(15696, 16005)|3.0|(1.000,1.000,1.000)|-1
AHSQVQLVQSGAEVKKPGASVKVSCKASGYTFTSYYMHWVRQAPGQGLEWMGIINPSGGS
TSYAQKFQGRVTMTRDTSTSTVYMELSSLRSEDTAVYYCAR
>V135RF-CABD02117467.1-ighv |(19808, 20117)|2.99696400065|(1.000,0.997,1.000)|-1
AYSQMQLVQSGAEVKKTGASVKVSCKASGYTFTYRSLHWVRQAPGQALEWMGWITPYNGN
TNYAQKFQDRVTITRDRSMSTAYMELSSLRSEDTAVYYCAR
>V136RF-CABD02117471.1-ighv |(687, 996)|2.99799200002|(1.000,0.999,0.999)|-1
VQCDVQLVQSGGGLVQPGGSLRLSCAASGFTFSSYWMHWVRQAPGKGLEWVANIKKDGSG
KYYVDSVKGRFTISRDNAKNSLYLQMNSLRAEDTAVYYCAR
>V137RF-CABD02117473.1-ighv |(12286, 12601)|3.0|(1.000,1.000,1.000)|-1
VQCEVQLVESGGGLVKPGGSLRLSCTASGFTFGDYTMSWVRQAPGKGLEWVGFIRSKAYG
GTTEYAASVKGRFTISRDDSKSIAYLQMNSLKTEDTAVYYCTT
>V138RF-CABD02117475.1-ighv |(8201, 8508)|2.92354496459|(0.982,0.991,0.954)|-1
VCAEVQLVQSAAEVKRPGESLRISCKGSGYSFTSYWIGWVRQMPGKGLEWMGIIYPGDSD
TRYSPSFQGQVTISADSSISTAYLQWSSLKASDTAMYYCA
>V139RF-CABD02117477.1-ighv |(2704, 3013)|2.99899600001|(1.000,1.000,0.999)|-1
VQCEVQLVESGGGLVQPGGSLRLSCVASGFTFSSYAMSWVRQAPGKGLEWVSTISSTGGS
TWYPGSVKGRFTISRDNSKNTLYLQMNSLRAEDTAVYYCAK
>V140RF-CABD02117481.1-ighv |(9894, 10203)|1.86843533952|(0.985,0.523,0.942)|-1
ILSQVQLQESGPGLVKPSETLSLTCAVSGDSISSGNWWIWVRQPPGKGLEWIGEINHSGS
TYYNPSLKSRITMSVDTSKNQFSLKLSSVTAADTAVYYCAR
>V141RF-CABD02117482.1-ighv |(11133, 11445)|2.99899600001|(1.000,0.999,1.000)|-1
VLSQVQLQESGPGLVKPSQTLSLTCTVSGGSISSGSYYWSWIRQPPGKGLEWIGYIYYSG
STNYNPSLKSRVTISVDTSKNQFSLKLSSVTAADTAVYYCAR
>V142RF-CABD02117482.1-ighv |(15935, 16229)|2.99494800078|(1.000,0.998,0.997)|-1
QLVQSGPEVKKPGASVKVSCKASGYTFTSSAMQWVRQAPGQGLEWIGWIIVGSGNTNYAQ
KFQGRVTITRDTSTSTAYMELSSLRSEDMAVYYCAA
>V143RF-CABD02117487.1-ighv |(1480, 1789)|3.0|(1.000,1.000,1.000)|-1
VQCEVQLVESGGGLVQPGGSLRLSCAASGFTFSSYHMSWVRQAPGKGLEWVSVIYSDGSS
TYYAASVKGRFTISRDNSKNTLYLQMNSLRAEDTAVYYCAR
>V144RF-CABD02117492.1-ighv |(7493, 7808)|2.9969280013|(0.997,1.000,1.000)|-1
VQCEVQLVESGGGLVQPGGSLRLSCAASGFTFSNYYKSWVCQAPGKGLEWVRFIRNKANG
GTTEYTTSVKGRFTISRDDSKSITYLQMNSLKTEDTAVYYCSR
>V145RF-CABD02117494.1-ighv |(3416, 3731)|3.0|(1.000,1.000,1.000)|-1
VQCEVQLLESGGGLVQPGGSLRLSCAASGFTFSDHYMDWVRQAPGKGLEWVGRIRNKANS
YTTEYAASVKGRFTISRDDSKNSLYLQMNSLKTEDTAVYYCTT
>V146RF-CABD02117499.1-ighv |(3042, 3351)|3.0|(1.000,1.000,1.000)|-1
VQCEVQLLESGGGLVQPGGSLRLSCAASGFTFSSYWMHWVRQAPGKGLEWVSRINSDGSS
TSYADSVKGRFTISRDNAKNTLYLQMNSLRAEDTAVYYCAR
>V147RF-CABD02117506.1-ighv |(3288, 3597)|2.99899600001|(1.000,0.999,1.000)|-1
TYSQVQLVQSGHEVKQPGASVKVSCKASGYSFTSYGMNWVRQAPGQGLEWMGWFNTYTGN
PTYAQGFTGRFVFSMDTSVSTAYLQISSLKAEDTAMYYCAR
>V148RF-CABD02117545.1-ighv |(2488, 2803)|2.97908440501|(0.999,0.984,0.997)|-1
VQCEVQLVESGGGLVQPGGSLRLSCAASGFTFSDHYRSWVRQAQGKGLELVGLIRNKANS
YTTEYAASGKGRFTISRGDSKNTLYLQMSSLKTEDLAVYYCAR
>V149RF-CABD02117766.1-ighv |(420, 729)|2.99899600001|(1.000,1.000,0.999)|-1
AHSQVQLVQSGAEVKKPGASVKVSCKASGYTFTDYYMHWVRQAPGQGLEWMGRINPNSGG
TNYTQKFQGRVTMTRDTSISTAYMELSRLRSEDTATYYCAR
>V150RF-CABD02117767.1-ighv |(2221, 2530)|2.99698000014|(0.998,0.999,1.000)|-1
AHSQVQLVQSGAEVKKPGASVKVSCKASGYTFTGYYMHWVRQAPGQGLEWMGWINPNSGG
TNYAQKFQGRVTMTRDTSISTAYMELSRLRSEDTATYYCTR
>V151RF-CABD02136430.1-ighv |(23813, 24119)|3.0|(1.000,1.000,1.000)|-1
VQCEVHLVQSGGGLVQPGGSLRLSCAGSGFTFSSHAMHWVRQAPGKGLEWVSAIGTGGGT
YYADSVKGRFTISRDNAKNSLYLQMNSLRAEDMAVYYCAR
>V152RF-CABD02136430.1-ighv |(37941, 38248)|3.0|(1.000,1.000,1.000)|-1
AQCEVQLVESGGGLVQPGGSLRLSCAASGFTFSNHYTSWVLQAPGKGLEWVSYISGDSDY
TNYADSVKGRFTISRDNAKNSLYLRMNSLRAEDTAVYYCV
>V153RF-CABD02196508.1-igkv |(4447, 4759)|2.90237531587|(0.987,0.979,0.944)|-1
CNGDIVLTQSPASLAMSPGQRATITCRASECVSFLGINLIHWYQQKPGQPPKLLIYQASN
KDIGVPARFSGSGSGTDFTLTINPVEANNTAKYYCLQSKNFP
>V154RF-CABD02196513.1-igkv |(3814, 4114)|2.99899200002|(0.999,1.000,1.000)|-1
AKCDIQMTQSPSTLSASVGDRVTITCRASQGISKLLAWYQQKPGKAPKLLIYAASSLESG
VPSRFSGSGSGTEFTLTISSLQPDDFATYYCQQHSSTP
>V155RF-CABD02196515.1-igkv |(8253, 8553)|2.99174403277|(1.000,0.992,1.000)|-1
ARCDIRMTQSPSSLSASVGDRVTITCRASQGIRNDLGWYQQKPGKAPKILIYAASSLQSG
VPSRFSGSGSGTDFTLTISSLQPEDFATYYCLQDYNYP
>V156RF-CABD02196517.1-igkv |(696, 995)|2.8372220574|(0.994,0.992,0.892)|-1
IVMTQSPATLSLSPGERATLSCRASQSVSSYLTWYQQKPGQAPRLLIYGASTRATGIPAR
FSGSGSGTDFTLTISSLQPEDFAVYYCQQHSNWPPTVI
>V157RF-CABD02196521.1-igkv |(5557, 5857)|3.0|(1.000,1.000,1.000)|-1
ARCDIQMTQSPSSLSASVGDRVTITCRASQGISKWLAWYQQKPGKAPKRLIYAASSLESG
VPSRFSGSGSGTEFTLTISSLQPEDFATYYCLQYNSYP
>V158RF-CABD02196542.1-igkv |(3007, 3305)|2.75900890101|(0.997,0.848,0.999)|-1
SRGEIVLTQSPDFQSVTPKEKVTITCRASQSIGSSLHWYQQKPDQSPKLLIKYASQSISG
VPSRFSGSGSGTDFTLTINSLEAEDAATYYCQQSSSL
>V159RF-CABD02196545.1-igkv |(4900, 5202)|2.89476289014|(0.985,0.932,0.989)|-1
SSGDIVMTQTPLSLPVTNGEPASISCRSSQSLVHSDGNTYLNWIQQRPGQPPRLLIYKVS
NRFSGVPDRFSGSGAGTDFTLKISRVEAEDVAVYYCTQG
>V160RF-CABD02196547.1-igkv |(2239, 2541)|2.99698000014|(1.000,0.998,0.999)|-1
SSGDVVMTQSPLSLPVTLGQPASISCRSSQSLVYSDGNTYLNWFQQKPGQSPRRLIYKVS
NRDSGVPDRFSGSGSGTDFTLEISRVEAEDVGVYYCMQG
>V161RF-CABD02196553.1-igkv |(790, 1090)|3.0|(1.000,1.000,1.000)|-1
ARCDIQLTQSPTSLSASVGDRVTITCQASQGISNNLAWYQQKPGKVPKLLIYSASSLQSG
VPSRFSGSGSGTDFTLTISSLQPEDVATYYCQRTYNAP
>V162RF-CABD02196556.1-igkv |(192, 492)|3.0|(1.000,1.000,1.000)|-1
ARCDIQMTQSPSSLSASVGDRVTITCRASQSVSNYLSWYQQKPGKAPKLLIYAASSLQSG
VPSRFSGSGSGTDFTLTISSLQPEDFATYYCQHGYGTP
>V163RF-CABD02196559.1-igkv |(8610, 8928)|2.98742416586|(1.000,0.988,1.000)|-1
SSGDIVMTQTPLSLPVTPGQPASISCRSSQSLLDSDDGNTYLYWYLQKPGQSPQLLIYEV
SNRASGVPDRFSGSGSGTDFTLKISRVEAEDVGVYYCMQSRELP
>V164RF-CABD02196901.1-igkv |(2814, 3114)|2.99696400065|(1.000,0.997,1.000)|-1
DRCDIQMTQSPSSLSASVGGRVTITCRASQGISNNLNWYQQKPGKTPKLLIYAASSLQSG
IPSRFSDSGSGTDYTLTISSLQPEDFAAYYCQQSDSTP
>V165RF-CABD02196902.1-igkv |(2361, 2661)|2.34396416178|(0.950,0.919,0.700)|-1
AKCAIQMTQSPSSLPASTGDRVTITCQASQGIGSYLNWYQQKPGKSPKLLIYYASYLQSG
IPSRFSGSGSGTDFTLTIDCLQPEDFATYYCEQSYGTP
>V166RF-CABD02320526.1-igkv |(17600, 17903)|2.06913780491|(1.000,0.579,0.998)|-1
TTGEIVLTQSPATLSSSPGERATLSCRASQSVSSSYLAWYQQKPGQAPRLLIYDASSRAT
GIPDRFSGSGSGTDFTLTISRLEPEDFAVYYCQQYSNWP
>V167RF-CABD02337338.1-trgv |(1057, 1370)|2.98070483945|(1.000,1.000,0.982)|-1
SQKSSNLEGRTKSVTRQTGSSAEITCDLTVTNTFYIHWYLHQEGKAPQRLLYYDVSTARD
VLESGLSSGKYYTHTPRRWSWILRLQNLIENDSGVYYCATWD
>V168RF-CABD02337338.1-trgv |(5430, 5730)|1.84838260409|(0.816,0.600,0.677)|-1
SQKSSNLEGRTKSVTRPPGSSAVITCDLPVENAAYIHWYLHQEGKAPQRLLYYDSYNSRV
VLESGISREKYHAYASTGKSLKFIVENLIEHDSGVYYC
>V169RF-CABD02337341.1-trgv |(2313, 2626)|2.97002987349|(0.999,0.996,0.977)|-1
SQKSSNLEGRTKSVIRQTGSSAEITCDLDGGSTGYIHWYLHQEGKAPQRLQYYDSYNSKV
VLESGVSPGKYYTYTSTRKNLRLILRNLIENDSGVYYCATWD
>V170RF-CABD02352555.1-trbv |(30194, 30488)|1.94801615618|(0.885,0.900,0.541)|-1
VRSQTIHQWPATLVQPVGSPLSLECTVEGTSNPNLYWYRQAAGRGLQLLFYSAGIGQISS
EVPQNLSASRPQDRQFILSSKKLLLSDSGFYLCAWS
>V171RF-CABD02379427.1-igkv |(3027, 3327)|3.0|(1.000,1.000,1.000)|-1
ARCDIQMTQSPSSLSASVGGRVTITCRASQGISNNLNWYQQKPGKTPKLLIYAASSLQSG
IPSRFSDSGSGTDYTLTISSLQPEDFAAYYCQQSDSTP
>V172RF-CABD02379503.1-igkv |(6201, 6501)|3.0|(1.000,1.000,1.000)|-1
ARCDIQMTQSPSSLSASVGGRVTITCRASQDISNNLNWYQQKPGKTPKLLIYAASSLQSG
IPSRFSDSGSGTDYTLTISSLQPEDFAAYYCQQSDSTP
>V0RF-AQIB01018214.1-trgv |(163723, 164036)|2.98184466791|(1.000,1.000,0.983)|1
SQKSSNLEGRTKSVTRPTGSSAEITCDLPEVSSFYIHWYLHQEGKAPQRLLYYDTSNSRV
VLESGISSGKYDSYGSTRRNLRLILRNLIENDSGVYYCANWD
>V1RF-AQIB01018215.1-trgv |(1470, 1783)|2.95229855551|(1.000,1.000,0.959)|1
SQKSSNLEGRTKSVTRPTGSSAEITCDFSGDSNFYIHWYLHQEGKAPQRLLYYDVSNSRD
VLESGLSPGKYYTHTRKRWSWILILRNLIENDSGVYYCANWN
>V2RF-AQIB01018217.1-trgv |(6282, 6595)|2.95096883512|(1.000,1.000,0.958)|1
SQKSSNLEGRTKSVTRPTGSSAEITCDLPEVSSFYIHWYLHQEGKAPQRLLYYDSSNSRV
VLESGISSGKYNSYESTRRSLRLRLQNLIENDSGVYYCANWD
>V3RF-AQIB01144236.1-igkv |(33225, 33525)|2.99899600001|(1.000,1.000,0.999)|1
ARCDIQMTQSPSSLSASVGDRVTITCRASQGINKELSWYQQKPGKAPTLLIYAASSLQTG
VPSRFSGSGSGTDFTLAISSLQPEDVATYYCLQDYTTP
>V4RF-AQIB01144236.1-igkv |(51256, 51574)|2.16957989471|(0.940,0.628,0.925)|1
SSGDIVMTQTPLFLPVTPGEPASISCRSSQSLMDSDVGFTYLHWYLQIPGQSPQLLMYFT
SYRASGVPDRFSGSGSGTDFTLEISKVEAEDIGVYYCMQGRELP
>V5RF-AQIB01144236.1-igkv |(68858, 69171)|2.08315213667|(0.853,0.649,0.765)|1
YSEDIVMTQTPLSLPVIPGEPASIFYRSSQSLLDSDEYTCLDWYLQKPGQSPQLLFYEVS
NRASGVPDRFSASGSGTDLTLKISRVEVEDDGVYYCMQSIVS
>V6RF-AQIB01144236.1-igkv |(99005, 99323)|2.99696400065|(1.000,1.000,0.997)|1
SSGDIVMTQTPLSLPVTPGEPASISCRSSQSLLDSDDGNTYLDWYLQKPGQSPQLLIYEV
SNRASGVPDRFSGSGSDTDFTLKISRVEAEDVGVYYCMQTIEYP
>V7RF-AQIB01144237.1-igkv |(7567, 7881)|2.85975363732|(0.958,0.923,0.987)|1
TSGDILLTQTPLSLPVTPGQLASISCRSSQSLLHSNGNTYLHWYLQEPGQSPQLLIYEVS
NRASGVPDRFSGSGSDTDFTLKINLVEAEDVGVYYCMQLHNGP
>V8RF-AQIB01144237.1-igkv |(12519, 12834)|2.30503232921|(0.966,0.988,0.662)|1
SSGDIVMTQTPLSLPVTLGEQASISCRSSQSLVYSDGKTYLNWYLQKPGQSPQLLMYLVS
KRASGVPDRFSGRGSGTDFTLKISRVEAEDVGVYYCMQALRSP
>V9RF-AQIB01144237.1-igkv |(20593, 20893)|2.82824248645|(0.995,0.971,0.900)|1
ARCDIQMTQSLSSLSASVGDRVTITCRASQGINNELAWYQQKPGKAPMLLLYSGSSLHTG
VPSRFSGSGSGTDFTLAISSLQPEDVAPYYCLQDYTTP
>V10RF-AQIB01144237.1-igkv |(28737, 29052)|2.96515566288|(1.000,0.974,0.994)|1
SSGDIVMTQTPLSLPVTPGEPASISCRSSQSLLDSYGYTNLNWYLQKPGQSPQLLIYLGS
NRASGVPDRFSGSGSGTDFTLKISGVEAEDVGVYYCMQGIQLP
>V11RF-AQIB01144240.1-igkv |(12918, 13233)|2.99698000014|(1.000,0.998,0.999)|1
TSGDIVMTQTPFSLPVNPGEPASISCRSSQSLSDSDGYTYLYWYLQKPGQSPQLLIYLGS
NRASGVPDRFSGSGSGTDFTLKISRVEAEDVGVYYCMQGIQLP
>V12RF-AQIB01144242.1-igkv |(6923, 7238)|2.90089450166|(0.993,0.976,0.943)|1
SSGDIVMTQTPLSLPVTPGEPASISCRSSQSLLHSDGYTYLYWYVQKPGHSPQLLIYLVS
NRASGVPDRFSGSGSGTDFTLKISRVEAEDVGVYYCLQGIQLP
>V13RF-AQIB01144242.1-igkv |(18230, 18530)|3.0|(1.000,1.000,1.000)|1
ARCDIQMTQSPSSLSASVGDRVTITCQGSQSLSNFLNWYQQKPGKIPKLLIYRASSLQSG
IPSRFSGSGSGTDYTLTISSLQPEDFATYYCQQGYSYP
>V14RF-AQIB01144242.1-igkv |(33676, 33991)|2.99696400065|(1.000,0.997,1.000)|1
TSGDIVMTQTPLSLPVTPGEPASISCRSSQSLLHSNGYTYLDWYVQKPGQSPQLLIYLVS
SRASGVPDRFSGSGSGTDFTLKISRVEAEDVGVYYCMQGTQLP
>V15RF-AQIB01144243.1-igkv |(9275, 9590)|2.98759608|(0.999,0.989,1.000)|1
TSGDIVMTQIPLSLPVTPGEPASISCRSSQSLLHSGGKTYLYWYLQKPGQSPQLLIYELS
NRASGVPDRFSGSGSGTDFTLKISGVEAEDVGVYYCMQGIQLP
>V16RF-AQIB01144243.1-igkv |(18759, 19059)|3.0|(1.000,1.000,1.000)|1
ARCDIQMTQSPSSLSASVGDRVTITCQASQGITNDLAWYQQKPGETPKLLIYEASSLQSG
IPSRFSGSGSGTDFTLTISSLQPEDFATYYCQHYYSTP
>V17RF-AQIB01144243.1-igkv |(52384, 52684)|2.99899200002|(0.999,1.000,1.000)|1
ARCDIQMTQSPSSLSASVGDRVTISCRASQNIYSNLAWYQQKPGKTPKLLIYAASSLQSG
IPSRFSGSGSGTDFTLTISSLQPEDYATYYCQHHYGTP
>V18RF-AQIB01144244.1-igkv |(12759, 13074)|2.98742416586|(1.000,0.988,1.000)|1
SSGDIVMTQTPLSLPVTPGEPASISCRSSQSLLHSDGRTYLYWYLQKPGQPPRLLIYTVS
NRFSGVPDRFSGSGSGTDFTLKISRVEAEDVGVYYCMQALQNP
>V19RF-AQIB01144247.1-igkv |(9074, 9389)|2.96607224753|(0.998,0.971,1.000)|1
SIGDIVMTQTPLSLPVTPGEPASISCRSSQSLLHSNGNTYLYWYLQKPGQPPQLLIYRVS
NRFSGVPDRFSGSGSGTDFTLKISRVEAEDVGVYYCMQALQTP
>V20RF-AQIB01144251.1-igkv |(6848, 7148)|2.99899200002|(0.999,1.000,1.000)|1
ARCDIQMTQSPSSLSASVGDRVTITCHASQGISNWLAWYQQKPGKAPKLLIYYASNLETG
VPSRFSGSRSGTDFTVTISSLQPEDIATYYCQQYDNFP
>V21RF-AQIB01144251.1-igkv |(16408, 16721)|1.903797941|(0.932,0.628,0.762)|1
STGDVVMTQTPLSLPVTPGEPASISCRSSQSVLHSNGNTYLEWYLQKPGHSPRLLIYKVT
KRESGVPDRFSGSGSGTDFTLKISRVEPEDVGVYYCMQGTKL
>V22RF-AQIB01144257.1-igkv |(11968, 12268)|2.99498000014|(0.998,1.000,0.997)|1
ARCDIQMTQSPSSLSASVGDRVTITCRASQGINNYLSWYQQKPGKAPKPLIYYASSLETG
VPSRFSGSGSGPDYTLTISSLQPEDIATYYCQQYDNFP
>V23RF-AQIB01144258.1-igkv |(1398, 1700)|2.92969465218|(0.969,0.970,0.993)|1
FSADVVMTQSPLSLPVTPGQPASITCRSSQSLLHSNGNTYLNWFLQKPGQPPRRLIYTVS
NRDSGVPDRFSGSGAGTDFTLKISRVEAEDVGVYYCMQV
>V24RF-AQIB01144263.1-igkv |(12287, 12602)|2.90863937084|(0.979,0.942,0.994)|1
SSGDVVMTQSPLSLPVTLGQPVSISCRSSQSLVHSDGKTYLNWLQQKPGQPPRLLIYQVS
NRYSGVPDRFSGSGAGTDFTLKISRVEAEDVGVYYCMQGTHFP
>V25RF-AQIB01144263.1-igkv |(20713, 21015)|2.96692188321|(0.999,0.977,0.993)|1
SSGDVVMTQSPLSLPVTPGQPASISCRSSQSLVHSDGKTYLNWFQQKPGQPPRRLIYQVS
SRDSGVPDRFSGSGAGTDFTLKISRVEAEDVGVYYCVQG
>V26RF-AQIB01144263.1-igkv |(50626, 50941)|2.98960007999|(1.000,0.990,1.000)|1
SSGDIVMTQTPLSLPVTLGEPASISCRSSQSLVYSDGKTYLDWYLQKPGQSPQLLIYYGS
NRASGVPDRFSGSGSGTDFTLKISSVEAEDVGVYYCMQAIQTP
>V27RF-AQIB01144263.1-igkv |(59031, 59331)|2.9339635143|(0.996,0.977,0.966)|1
TRCAIQMTQSPSSLSASVGDRVTITCWASQSIGSNLAWYQQKPGKVPKLLIYAASTLQSE
VPSRFSGSGSGTDFTLSISSLQPEDVATYYCQKCDSAH
>V28RF-AQIB01144263.1-igkv |(96224, 96526)|2.99696400065|(1.000,1.000,0.997)|1
STGDVVMTQSPLSLPVTPGEPASISCRSSQSLLHSSGNTYLSWFQQKPGQSPRRLIYKVS
NRDSGVPDRFTGSGAGTDFTLKISRVEAEDVGVYYCMEG
>V29RF-AQIB01144264.1-igkv |(29331, 29633)|2.99696400065|(1.000,1.000,0.997)|1
STGDVVMTQSPLSLPVTPGEPASISCRSSQSLLHSSGNTYLSWFQQKPGQSPRRLIYKVS
NRDSGVPDRFTGSGAGTDFTLKISRVEAEDVGVYYCMEG
>V30RF-AQIB01144264.1-igkv |(45678, 45976)|2.85165453485|(0.999,0.895,1.000)|1
SKGEIVLTQSPAFRSVTLKEKVTITCQASQSIGSSLHWYQQKPDQSPKLLIKYASQSISG
VPSRFSGSGSGTDFTLTINSLEAEDAATYYCQQSSSF
>V31RF-AQIB01144264.1-igkv |(72133, 72421)|3.0|(1.000,1.000,1.000)|1
IVLTQSPATLSLSPGETATLSCRASQSVGSSLAWYQQKPGQVPRLLIYGASSRATGIPDR
FSGSGSGTEFTLTISSLQPEDFAVYYCQKYSSSP
>V32RF-AQIB01144264.1-igkv |(77620, 77920)|2.83094825589|(0.979,1.000,0.887)|1
VRCDIQMTQSPSFLSASVGDRVTITCQASQSISNDLAWYQQKPGKSPTLLICDATNLHTG
VPSWFSGSGSGADYYLTISSLELEDFAAYYCQQEYSYP
>V33RF-AQIB01144264.1-igkv |(103470, 103785)|2.44523664903|(0.804,0.805,0.842)|1
SSGDIVMIQTPLSLPVTPGEPASISCRSSQNLLHSDGNTYLHWYLQKPGQSPQLLIYGGS
NRFAGVPDRFSGSGSATDFTMKISRVEAKDVGVYYCMQGIQFP
>V34RF-AQIB01144265.1-igkv |(9151, 9443)|2.85344780448|(0.999,0.896,1.000)|1
SRGDIVMTQSPAFVSVTPGEKVTITCQASEGISNYLHWYQQKPDQAPKLLIQYASQSISG
VPSRFTGSGSGTDFTFTISSLEVEDAATYYCQQGN
>V35RF-AQIB01144265.1-igkv |(25389, 25680)|2.99396400065|(0.999,0.996,0.999)|1
DIQMTQSPSSLSASVGDRVTITCQASQSFSSSLAWYQQKPGKAPKLLIYAASSLQSGVPS
RFSGSKAGTDFTLTISSLQPEDVATYYCQQYYSTP
>V36RF-AQIB01144265.1-igkv |(40570, 40862)|3.0|(1.000,1.000,1.000)|1
AKCDIQMTQSPSSLSASVGDRVTITCRASQTISSYLAWYQQKPGKVPKLLIYAASSLESG
IPSRFSGSGSGTEFTLTISSLQPEDFATYYCQQHN
>V37RF-AQIB01144265.1-igkv |(60992, 61284)|2.99498400013|(0.999,0.997,0.999)|1
ARCDIQMTQSPSSLSASVGDRVTVTCRASQGISNYLSWYQQEPGKAPKLLIYAASSLESG
VPSRFSGSGSGTEFTLTISSLQPEDFATYYCLQHN
>V38RF-AQIB01144265.1-igkv |(75665, 75964)|3.0|(1.000,1.000,1.000)|1
TTGEIVMTQSPATLSLSPGERATLSCRASQSVSSYLAWYQQKPGQAPRLLIYGASSRATG
IPDRFSGSGSGTEFTLTISSLEPEDVGVYYCQQYNNWN
>V39RF-AQIB01144265.1-igkv |(84906, 85206)|2.99899600001|(1.000,1.000,0.999)|1
ARCDIQMTQSPSSLSASVGDRVTITCRASQGISNYLNWYQQKPGKAPKLLIYSASRLQSG
VPSRFSGSGSGTEFTLTISSLQPEDFATYYCEQFKNYL
>V40RF-AQIB01144269.1-igkv |(1727, 2027)|2.92916627772|(0.965,0.987,0.980)|1
STGEIVMTQSPATLSLSPGETTTLSCSASQSVGSYLAWYQQKPGQAPKLLIHSAYFRATG
IPDRFSGSGSRTVFTLTISSLEPEDVGVYYCQQYNDLP
>V41RF-AQIB01144269.1-igkv |(40447, 40747)|2.99593600205|(1.000,1.000,0.996)|1
ARCDIQLTQSPSSLSASVGDRVTITCRASQGISSYLAWYQQKPGKAPKLLIYDASNLQSG
VPSRFSGSGSGTEFTLTISSLQPEDFATYYCQQRNSLP
>V42RF-AQIB01144273.1-igkv |(1759, 2059)|2.99798400013|(1.000,1.000,0.998)|1
ARCDIQMTQSPSSLSVSVGDRVTITCRASQGISNYLSWYQQKPGKAPKLLIYSASSLESG
VPSRFSGSGSGTDYTLTISSLQPEDFAAYYCLQYQSIP
>V43RF-AQIB01144273.1-igkv |(12272, 12572)|2.92774192532|(0.987,0.978,0.965)|1
TTREIVFTQSPATLSLSPGERATLSCRASQSVGSSLAWYQQKSGQAPRLLVYHASSRATG
IPARFSGSGSGTDFTLTISSLEPEDVGVYYCQKYNDWP
>V44RF-AQIB01144273.1-igkv |(55407, 55707)|2.99696400065|(1.000,1.000,0.997)|1
ARCDIQMTQSPSSLSASVGDRVTITCRASQGISNALAWYQQKPGKVPKLLIYAASSLQSG
LPSGFSGSGSGTEFTLTISSLQPEDFATYYCQQGYSTP
>V45RF-AQIB01144273.1-igkv |(67090, 67390)|3.0|(1.000,1.000,1.000)|1
ARCDIQMTQSPSSLSASVGDRVTITCRASQGISNNLAWYQQKPGKAPKLLIYDATTLQSG
VPSRFSGSGSGTEFTLTISSLQPEDFATYYCQQYNSYP
>V46RF-AQIB01144273.1-igkv |(86428, 86728)|2.98492000218|(0.997,0.995,0.993)|1
TTGEIVMTQSPATLSLSPGETATLSCKTSQSVGSKLAWYQQKPGQAPRLLIYGASSRATG
IPARFSGSGSGTDFTLAISSLEPEDVGAYYCQETSSLS
>V47RF-AQIB01144274.1-igkv |(43133, 43433)|2.98688400513|(0.998,0.993,0.996)|1
ARCDIQMTQSPSSLSASVGDTVTITCPASQGISSYLNWYQHKPGKAPKLLIYYATTLQSG
VPSRFSGSGSGTEFTLTISSLQPEDFAAYYCQQYKSLP
>V48RF-AQIB01144274.1-igkv |(49577, 49877)|3.0|(1.000,1.000,1.000)|1
ARCDIQMTQSPSSLSASVGDKVTITCHASQGISSWLAWYQQKPGKAPKLLIYKASSLQSG
VPSRFSGSGSGTDFTLTISSLQPEDFATYYCQQITSAP
>V49RF-AQIB01144274.1-igkv |(65782, 66082)|2.42720899438|(0.991,0.709,1.000)|1
TTGEIVMTQSPATLALSPGERATLSCRTSQSVSSRLAWYQQKPGQAPRLLIYDASSRATG
IPDRFSGSGSGTEFTLTISSLEPEDVGVYYCQQDYSWP
>V50RF-AQIB01144276.1-igkv |(25002, 25302)|2.99698000014|(0.998,0.999,1.000)|1
ARRDIQMSQSPSSLSASVGDRVTITCHASQGISSWLAWYQQKPGKAPKLLIYKASSLQSG
VPSRFSGSGSGTDFTLTISSLQPEDFATYYCLQYDSNP
>V51RF-AQIB01144276.1-igkv |(29444, 29742)|2.63325330366|(0.997,0.792,0.999)|1
TTGEIVMTQSPATLALSPGERATLSCRASQSVSSRLAWYQQKPGQAPRLLIYDASSRATG
IPDRFSGSGSGTDFTLTISSLEPEDVAVYFCQQESNW
>V52RF-AQIB01144276.1-igkv |(40183, 40483)|2.99899600001|(1.000,1.000,0.999)|1
ARCDIQMTQSPSSLSASVGDRVTITCQASQGISNYLAWYQQKPGKAPKLLIYYASTLQSG
VPSRFSGSGSGTEFTLTISSLQPEDFATYYCQQHNSNP
>V53RF-AQIB01144276.1-igkv |(56521, 56821)|3.0|(1.000,1.000,1.000)|1
ARCDIQMTQSPSSLSASVGDRVTITCQASQGISNYLAWYQQKPGKAPKPLIYKASTLESG
VPSRFSGSGSGTEFTLTISSLQPEDFATYYCQQRNSYP
>V54RF-AQIB01144282.1-igkv |(3113, 3400)|2.91316849053|(0.995,0.936,0.996)|1
TVVTQSPATLSLSPGERATVSCRTSQSVSNRLAWYQQKPGQAPRLLIYGASNRATGIPAR
FSGSGSGTDFTLTISSLELEDAAVYYCQQDNDWK
>V55RF-AQIB01144282.1-igkv |(46328, 46640)|2.99499200002|(0.999,0.998,0.998)|1
CNGDIVLTQSPASLAVSPGQKATITCRASESVSLFGINFIHWYQQKPGQPPKLLIYQASN
KDTGVPARFSGSGSGTDFTLTINPVEADDAANYYCLQSKTSP
>V56RF-AQIB01144282.1-igkv |(64268, 64559)|2.98967205249|(1.000,0.991,0.999)|1
IVLTQSPTSMAVSQGERVTISCTASSSISTSYLHWYQQKPGFPPRLLVYTTSSLASGVPA
RFSGSGSGTSYTLTISSMEAEDAANYYCQQGSSIP
>V57RF-AQIB01146109.1-igkv |(79026, 79336)|1.70996696759|(0.565,0.725,0.524)|1
SLSQPVLTQSPSASASLGASVKLTCTLSSGHSSYNIAWHQQQQGKAPRYLMRLNSDGSHS
KGDGIPDRFSGSSSGADRYLTISNLQSEDEADYYCHTWDTG
>V58RF-AQIB01146122.1-iglv |(12217, 12527)|2.97896052424|(0.998,0.982,1.000)|1
SWAEVVFTQPHSVSGSPGQTVTISCTRSSGSIDSSFVYWYQQRPGSAPTTVIYNDNRRPS
GVPDRFSGSIDSSSNSASLTISGLKSEDEADYYCQSDDSSG
>V59RF-AQIB01146122.1-iglv |(69507, 69814)|3.0|(1.000,1.000,1.000)|1
SWAQSVLTQPPSVSGAPGQRVTISCTGSSSNIGGYNVHWYQQLPGTTPKLLIYGNNQRPS
GVSDRFSGSKSGTSASLTITGLQSEDEADYYCQSYDSSLS
>V60RF-AQIB01146122.1-iglv |(85423, 85724)|1.53110912931|(0.518,0.915,0.582)|1
SLSQPVLTQPPSASASLGASVTLTCTLSSGYSNYAVDWHQQRPGKGPQFVMRVGTGGIVG
SKGDGIPDRFSGSGSGLNRYLTIKNIQEEDESDYHCGA
>V61RF-AQIB01146122.1-iglv |(92188, 92498)|2.64889678962|(0.998,0.805,0.985)|1
SLSQPVLTQPTSLSASPGASARLTCTLRSGISVGSYRVLWYQQKPGNPPRYLLNYHTDSD
KDQGSGVPSRFSGSKDASANAGILLISGLQSEDEADYYCAI
>V62RF-AQIB01146122.1-iglv |(97013, 97322)|2.99899600001|(1.000,0.999,1.000)|1
CWAQSVLTQPPSASGAPGQSVTISCSGSSSNIGSNSVYWYQQFPGTAPKLLIYYSNQRPS
GVPDRFSGSKSGTSASLTISGLQSEDEADYYCAAWDDSLSG
>V63RF-AQIB01146122.1-iglv |(110604, 110914)|2.68164226946|(0.996,0.987,0.818)|1
SLSQPVLTQPASLSASPGASASLTCTFSGGINVAGYYIYWYQQKPGSPPRYLLRYKSDSE
KHQGSGVPSRFSGSKDASANTGILRISGLQSEDEADYYCAI
>V64RF-AQIB01146122.1-iglv |(126866, 127176)|2.93246510429|(0.999,0.959,0.982)|1
SLSQPVLTQPTSLSASPGASVRLTCTLRSGISVGGYNIHWYQQKPGSPPRYLLYYYSDSN
KGQGSGVPSRFSASKDASANAGILLISGFQSEDEADYYCTT
>V65RF-AQIB01146122.1-iglv |(131665, 131974)|3.0|(1.000,1.000,1.000)|1
SWAQSVLTQPPSASGAPGQSVTISCSGSSSNIGSNYVSWYQQLSGKAPKLLIYKNSQRPS
GVPDRFSGSKSGTSASLTISGLRSEDEADYYCAAWDDSLNG
>V66RF-AQIB01146122.1-iglv |(149998, 150308)|2.97912824764|(1.000,0.993,0.987)|1
SLSQPVLTQPASLSASPGASARLSCTLSSGINVGSYSIYWYQQKPGSPPRYLLYYYSDSS
KGQGSGVPSRFSGSKDASANAGLLLISGLQSEDEADYYCAI
>V67RF-AQIB01146122.1-iglv |(159131, 159440)|2.99899600001|(1.000,1.000,0.999)|1
SWAQSVLTQPPSVSGAPGQRVTISCTGSSSNIGGYYVQWYQQLSGTAPKLLIYGNNQRPS
GVSDRFSGSKSGTSASLTITGLQSEDEADYYCETWDNSLNG
>V68RF-AQIB01146122.1-iglv |(164963, 165270)|2.98670803341|(0.992,1.000,0.995)|1
SWAQSVLTQPPSVSGAPGQRVTISCTGSSSNIGGYDVHWYQQLPGTTPKLLIYDNNKRPS
GVSDRFSGSKSGTSASLTITGLQTEDEADYFCQSYDSSLG
>V69RF-AQIB01146122.1-iglv |(187790, 188100)|2.94390279134|(0.998,0.987,0.964)|1
SLSQPVLTQPASLSASPGASASLTCTFSGGINVAGYYIYWYQQKPGSPPRYLLWYKSDSD
KHQGSGVPSRFSGSKDASANTGILRISGLQSEDEADYYCAI
>V70RF-AQIB01146123.1-iglv |(2181, 2490)|2.99596000066|(1.000,0.997,0.999)|1
SWAQSVLTQPRSASEATRKSITISCSGSSSNIGSNYVSWYQQLPGTAPKLLIYYNDWRAS
GVSDRFSGSKSGTSASLAISGLQTEDEADYYCAAWDDSLSG
>V71RF-AQIB01146133.1-iglv |(15765, 16070)|2.42895354029|(0.977,0.707,1.000)|1
SVASYELTQPPSVSVSPGQTAKITCSGDTLAKIYARWFQQKPGQAPVLVIYKDSERPSGI
PERFSGSSSGTTVTLTISGAQAEDEADYYCYSGDDNNLTV
>V72RF-AQIB01146133.1-iglv |(25439, 25742)|3.0|(1.000,1.000,1.000)|1
SWAQSALTQSPSVSGSPGQSVTISCTGTSSDVGGYNYVSWYQQHPGKAPKLMIYEVSKRP
SGVSDRFSGSKSGNTASLTISGLQAEDEADYYCCSYTTS
>V73RF-AQIB01146133.1-iglv |(37913, 38216)|2.94015412024|(0.998,0.971,0.976)|1
SAASYDLTQPHSVSVSPGQTARITCGGDDIGSEAVHWYQQKPAQAPVLVIYDNSDRPSGI
PERFSGSNSGNTATLTISGVEAGDEADYYCQVWDISSDH
>V74RF-AQIB01146133.1-iglv |(45024, 45327)|2.03451400886|(0.972,0.733,0.735)|1
SVVSSELTQEPALSVALGHTVTMTCQGDSLSSYYASWYQQKPGQVPVLVIYGNTNRPSGI
SGRFSGSWSGNTASLTITGAQVEDEADYYCGSWDNSANH
>V75RF-AQIB01146135.1-iglv |(5642, 5953)|2.21007731488|(0.954,0.639,0.945)|1
SAASYELTQPPSVSVSPGQMARITCRGDSIGSKYVQWFQQKPAQAPVLVIYSDSKRPSGI
PERFSGSNSGNTATLTISGVQAGDEADYYCQVWDSSSKHATV
>V76RF-AQIB01146136.1-iglv |(1665, 1968)|2.99899600001|(1.000,0.999,1.000)|1
SWAQSAPTQPRSVSGSPGQSVTISCTGTSSDIGGYNYVSWYQQHPGTAPKLMIYGVSNRP
SGVSDRFSGSKSGNTASLTISGLQAEDEADYYCCSYTTS
>V77RF-AQIB01146137.1-iglv |(9886, 10183)|2.9949000027|(0.996,0.999,1.000)|1
SVASYELTQPPSVSVSPGQTARITCSGDVLKENYADWYQQKPGQAPVLLIYEDSKRPSGI
PERFSGSTSGDTTTLTISSTLSEDGADYYCFSGDENN
>V78RF-AQIB01146137.1-iglv |(18233, 18536)|2.98764005313|(1.000,0.991,0.997)|1
SAVSYELTQPRSVSVSPGQTARITCGGDSIGSKYVHWYQQKPAQAPVLVIYDNSNRPSGI
PERFSGSNSGNTATLTISGVQAGDEADYYCQVWDSSSKH
>V79RF-AQIB01146137.1-iglv |(25864, 26167)|2.99899600001|(1.000,1.000,0.999)|1
SVVSSELTQDPAVSVALGQTVRITCQGDSLRSSYASWYQQKPGQAPVLVVYGNNNRPSGI
PERFSGSSSGNTASLTITGAQVEDEADYYCNSWDSSGNH
>V80RF-AQIB01146138.1-iglv |(15714, 16017)|2.994|(0.998,0.998,0.998)|1
SWAQAALTQPPSVSKSLGQSVTISCTGTSSDIAAYNDVSWYQQHPGTAPRLLIYSVSNRP
SGVSDCFSGSKSGNTASLTISGLQAEDEADYYCCSYRSG
>V81RF-AQIB01146138.1-iglv |(24129, 24432)|2.98764005313|(1.000,0.991,0.997)|1
SAVSYELTQPRSVSVSPGQTARITCGGDSIGSKYVHWYQQKPAQAPVLVIYDNSNRPSGI
PERFSGSNSGNTATLTISGVQAGDEADYYCQVWDSSSKH
>V82RF-AQIB01146140.1-iglv |(2757, 3067)|2.8844976111|(1.000,0.915,0.998)|1
SWAQAALTQPHSVSGSPGQSVTISCTGTSSDIGGYNRVSWYQQHPGKAPKLMIYEVSNRP
SGVSDRFSGSKSGNTASLTISGLQAEDEADYYCSSYASSSN
>V83RF-AQIB01146140.1-iglv |(9668, 9971)|2.02139600681|(0.974,0.560,0.984)|1
SEASYELTQPPSVSVSPGQTARITCSGEILAKKYARWFQQKPGQAPVLVIYKDSERPSGI
PERFSSSSSGTTVTLTISGVQAEDEADYYCQSADSSGNH
>V84RF-AQIB01146140.1-iglv |(26014, 26324)|2.98989600501|(0.998,0.999,0.993)|1
SWAQAALTQPPSVSGSPGQSVTISCTGTSSDVGGYNYVSWYQQHPGKAPKLMIYEVNKRP
SGVSDRFSGSKSGNTASLTISGLQAEDEADYYCSSYAGSNT
>V85RF-AQIB01146141.1-iglv |(2344, 2645)|2.99696400065|(1.000,0.997,1.000)|1
SVASYELTQPPSVSVSPGQTARITCSGDALPDNYAYWFQQKPGQSPVLIIYEDSKRPSGI
PERFSGSSSGTVATLTISGAQVEDEADYYCYSADSSGN
>V86RF-AQIB01146141.1-iglv |(10119, 10425)|1.90312853653|(0.923,0.538,0.893)|1
SVASYELTQPLSVSVALGQMARITCGGNNIGRKNVQWYQQKPDQAPVLVIYQDSKRPSGI
PERFSGSNSGNTATLTIDRAQAGDEADYYCQVWDSSTAHS
>V87RF-AQIB01146141.1-iglv |(13491, 13794)|3.0|(1.000,1.000,1.000)|1
SWAQAAPTQSPSVSGSAGQSVTISCTGTSSDIGGYNRVSWYQQHPGKAPKLMIYEVSKRP
SGVSDRFSGSKSGNTASLTISGLQAEDEADYYCSSYAGS
>V88RF-AQIB01146141.1-iglv |(50602, 50912)|2.91414228761|(0.994,0.942,0.989)|1
SWAQSAPIQSPSVSGSLGQSVTISCTGTSSDIGRYNYVSWYRQQPGTTTKLTMYNVNTRP
SGVSDRFSGSKSGNTASLTISGLQAEDEADYYCSSYETSDT
>V89RF-AQIB01153480.1-ighv |(7301, 7610)|2.99398000014|(0.999,0.998,0.997)|1
VLSQLQLQESGPGLVKPSETLSLTCAVSGGSISSYWWGWIRQAPGKGLEWIGNIYGSGGS
TEYNPSLKSRVTISKDTSKNQFSLKLSSVTAADTAVYYCAR
>V90RF-AQIB01153481.1-ighv |(29869, 30184)|3.0|(1.000,1.000,1.000)|1
VQCEVQLVESGGGLIQPGGSLRLSCAASGFTFSDYAMSWVRQASGKGLEWVGYIRSKSNN
YATEYAASVKGRFTISRDDSKNTLYLQMSGLKTEDTAVYYCTI
>V91RF-AQIB01153482.1-ighv |(4668, 4983)|3.0|(1.000,1.000,1.000)|1
VQCEVQLVESGGGLVQPGGSLRLSCAASGFTFSDHYMQWVRQAPGKGLEWVGFIRSKAYG
GTAEYAASVKGRFTISRDDSKSITSLQMNSLKTEDTAVYYCTR
>V92RF-AQIB01153482.1-ighv |(18678, 18987)|3.0|(1.000,1.000,1.000)|1
VQCEVQLVESGGGLVQPGGSLKLSCAASGFTFGDYAMSWVRQAPGKGLEWVSSISNTGKT
TYYADSVKGRFTISRDNAKNSLSLQMNSLRAEDTAVYYCAR
>V93RF-AQIB01153482.1-ighv |(23774, 24083)|2.97955704207|(1.000,0.981,1.000)|1
VQGEVQLVESGGGLAKPGGSLRLSCAASGFTFSNYYMHWVRQAPGKGLEWVSSINTGGGS
TYYADSVKGRFTISRDNSKNTLSLQMDSLRAEDTAVYYCAK
>V94RF-AQIB01153484.1-ighv |(24203, 24512)|2.80197252412|(0.940,0.924,0.939)|1
AQSQVQLVQPGAEMRKPGDSVKVSCKASGYTFTNHDVDWVRQAPGQGPEWMGGINTNTGG
TSCAQTFQGRVTMTRDTTTSTAFMELSSLRSEDTAVYYCAR
>V95RF-AQIB01153484.1-ighv |(33458, 33767)|2.99899200002|(0.999,1.000,1.000)|1
AHSQVQLVQSGAEIKQPGASVKLSCKASGYTFTSYYMHWVRQAPGQGLEWIGLISPYNGN
KGYAQNFQGRVTITTDTSTSTGYMELSSLRSEDTAVYYCTR
>V96RF-AQIB01153485.1-ighv |(161, 470)|2.95330075255|(0.984,0.971,1.000)|1
VQGEVQLVESGGGLAKPGGSLRLSCAASGFTFSDYHMHWVRQAPGKGLQWVSAINSGGGS
TWYADSVKGRFTISRENAKNTLYLQMDSLRAEDTAVYYCAK
>V97RF-AQIB01153486.1-ighv |(413, 728)|3.0|(1.000,1.000,1.000)|1
VQCEVQLVESGGGLVQPGGSLRLSCAASGFTFSDYAMHWVRQAPGKGPEWVGFIRSKAYG
GTAEYAASVKGRFTISRDDSKNTAYLQMNSLKTEDTAVYYCTI
>V98RF-AQIB01153489.1-ighv |(27642, 27951)|2.96958408012|(0.994,0.992,0.984)|1
AHSEVQLVQSGAEVRKPGASVKVSCKVSGYTLTELSMHWVRQAPGKGLEWMGGVDPVYGE
TIHAEKFQGRVTMTEDTSTDTAYMELSSLRSEDTAVYYCAR
>V99RF-AQIB01153491.1-ighv |(2235, 2549)|2.27752052158|(0.976,0.923,0.682)|1
VLSQVTLKESGPALVKPTQTLTLTCTFSGFSLTTSGMGVGWIRQPPGKALEWLAHIYWDD
DKRYSPSLKSRLTISKDTSKNQVVLTMTNMDPVDTATYYCARR
>V100RF-AQIB01153491.1-ighv |(11513, 11822)|2.95866265282|(0.996,0.993,0.972)|1
VHSQVQLVQSGAEVKKPGASVKLSCKASGFTLGSYAISWVRQAPGQGLEWMGGIIPLVGI
TNYAQKFQGRVTITADTSTTTAYMELSSLRSEDTAVYYCAR
>V101RF-AQIB01153491.1-ighv |(20597, 20906)|2.83758265101|(0.954,0.999,0.903)|1
AHSQVQLVQSGAEVEKPGASVKVSCKATGYTFTNYFMQWVRQAPGQGLEWMGWVYLGNGN
TNYVQKFQGRVTMTRDVSTNTAYMELGSLRSKDMAVYYCAR
>V102RF-AQIB01153492.1-ighv |(6792, 7104)|3.0|(1.000,1.000,1.000)|1
VLSQVQLQESGPGLVKPSETLSLTCAVSGGSISSSYWSWIRQSPGKGLEWIGDIYGSSGG
STSYNPSLKSRVTMSVDTSKNQFSLKLSSVTAADTAVYYCAR
>V103RF-AQIB01153498.1-ighv |(778, 1087)|2.94426990764|(0.998,1.000,0.954)|1
AHSQVQLVQSGAEVKKPGSSVKVSCKASGYTFTDYYMQWVRQAPGQGLEWMGRINPKTGG
TDYAQKFQGRVTMTRDTSTSTAYMELSSLRSEDTAVYYCAR
>V104RF-AQIB01153501.1-ighv |(4567, 4876)|3.0|(1.000,1.000,1.000)|1
VQCEVQLVESGGGLVQPGASLRLSCAASGFTFGDYAMSWVRQAPGKGLEWVSYISSASST
IYYADSVKGRFTISRDNAKNSLYLQMNSLKTEDTAVYYCTR
>V105RF-AQIB01153501.1-ighv |(18760, 19071)|2.99096400065|(0.998,0.995,0.998)|1
VQCEVQLVESGGGVVQPEGSLRLSCAASRFTFDDYAMSWVRQAPGKGLEWVSVISWTRRS
TYYADSVKGRFTISRDNTKNSLYLQMDRLRAEDTALYYCAKD
>V106RF-AQIB01153504.1-ighv |(6983, 7290)|2.95482001102|(0.986,0.989,0.980)|1
AHSQVQLVLSRAEVEKPGASVKVSCKASGYTFTSYFMQWVGQAPGQGREWMGWVYLGNGN
TNYEQKFQGRVTITRDVSTSTTYMELSTLRSEDMAVYYCA
>V107RF-AQIB01153506.1-ighv |(6406, 6713)|2.95482001102|(0.986,0.989,0.980)|1
AHSQVQLVLSRAEVEKPGASVKVSCKASGYTFTSYFMQWVGQAPGQGREWMGWVYLGNGN
TNYEQKFQGRVTITRDVSTSTTYMELSTLRSEDMAVYYCA
>V108RF-AQIB01153507.1-ighv |(14778, 15088)|2.98580001921|(0.998,0.997,0.991)|1
ALSQVQLQESGPGVVKPSETLSLTCAVSGYSISSGYYWGWIRQPPGKGLEWIGSIYGSGG
SNYLNPSLKSRVTLSVDTSKNQFSLKLSSVTATDTAVYYCA
>V109RF-AQIB01153507.1-ighv |(24714, 25023)|3.0|(1.000,1.000,1.000)|1
VQCEVQLVESGGGLVQPGGSLRLSCAASGFTFSSYWMHWVRQAPGKGLEWVSLINSDGGS
TRYADSVKGRFTISSENAKNSLYLQMNSLRAEDTAVYYCAR
>V110RF-AQIB01153507.1-ighv |(32453, 32768)|2.99899600001|(1.000,0.999,1.000)|1
VQCEVQLVQSGGGLVQPGGSLRLSCAASGFTFSEYAMAWVRQASGKGLEWVGRIRSKSNN
YGTAYAASVKGSFTISRDDSKNTLYLQMSSLKTEDTAVYYCTR
>V111RF-AQIB01153507.1-ighv |(42168, 42483)|2.98570803341|(0.997,1.000,0.989)|1
VQCEVQLVESGGGLVQPGGSLKLSCAASGFTFSNYYMDWVRQAPGKGLEWVGRIRNKANS
HTTEYAASVKDRFTISRDDSKNTLYLQMSGLKTEDKAVYYCAR
>V112RF-AQIB01153509.1-ighv |(6082, 6394)|3.0|(1.000,1.000,1.000)|1
VQCEVQLVESGAGLVQPGGSLRLSCAASGFTFSDYYMDWVRQAPGKGLEWVSRISSGSGS
STYYPDSVKGRFTISRDNSKNTLYLQMNSLRAEDTAVYYCAR
>V113RF-AQIB01153509.1-ighv |(13578, 13893)|2.99289600501|(0.999,0.994,1.000)|1
VQCEVQLVESGGGLVQPGGSLRLSCAASGFTFSNHYMHWVRQAPGKGQEWVGFIRNKANG
GTAEYAASVKGRFTISRDDSKSITSLQMNSLKTEDTAVYYCTR
>V114RF-AQIB01153509.1-ighv |(29997, 30306)|3.0|(1.000,1.000,1.000)|1
VQCEVQLVESGGGLVQPGGSLRLSCAASGFTFGDYDMSWVRQAPGKGLEWVSFISYTGKT
TYYADSVKGRFTISRDNAKNSLSLQMNSLRAEDTAVYYCTR
>V115RF-AQIB01153509.1-ighv |(39117, 39410)|1.7543584202|(0.598,0.962,0.606)|1
VQCEVQLVESGGGLVQPGGSLRLSCGASGFTFSDHYMDWVRQAPGKGLEWVSSISTGSGS
TTLYPDSVKGRFTISRDNAKNTLYLQMNSLRADVFS
>V116RF-AQIB01153509.1-ighv |(45356, 45665)|2.99192000218|(0.998,0.994,1.000)|1
AHSEVQLVQSGAEVKKPGASVNVSCKASGYTFTDYYLHWVRQAPGKGLEWMGRIDPENGE
SKYAQKFQDRLTMTADTSTDTAYMELSSLRSEDTAVYYCAT
>V117RF-AQIB01153511.1-ighv |(7980, 8295)|3.0|(1.000,1.000,1.000)|1
VQCEVQLVESGRGLVQPGGSLRLSCAVSGFTFSDHYMSWVREAPGKGLEWVGFMRNKANG
GRTEYAASVKGRFTISRDDSKSIASLQMSSLKTEDTAVYYCAR
>V118RF-AQIB01153511.1-ighv |(11094, 11404)|2.99696400065|(1.000,1.000,0.997)|1
VQCEVQLVESGGGLVQPGGSLRLSCVASGFTFSDHYMDWVRQAPGKGLEWVSSISTGSGS
TTLYPDSVKGRFTISRDNAKNTLYLQMNSLRADDTAVYYCA
>V119RF-AQIB01153511.1-ighv |(40798, 41107)|2.99899200002|(0.999,1.000,1.000)|1
VQCEVQLVESGGGLAKPGGSLRLSCAASGFTFSSYGMHWVRQAPGKGLEWISAINSGGSN
TWYTDSVKGRFTISRDNSKNTLSLQMNSLRAEDTAVYYCAK
>V120RF-AQIB01153514.1-ighv |(1201, 1515)|1.7102496668|(0.933,0.823,0.511)|1
VLSQVTLKESGPVLVKPTQTLTLTCTFSGFSLSTSGVGVSWTRQPPGKALEWLALIYWHD
DKNYSPSLKSRLTISKDTSNNQVVLTMTNMDPVDTATYYCARR
>V121RF-AQIB01153517.1-ighv |(601, 913)|2.99596800026|(1.000,0.998,0.998)|1
VLSQVQLQQWGGGLVKPSETLSLTCAVYGGSISGYYYWSWIRQPPGKGLEWIGNIDGNSG
STNYNPSLKSRVTISKDTSKNQFSLKLSSVTAADTAVYYCAR
>V122RF-AQIB01153522.1-ighv |(387, 699)|2.93197652411|(0.983,0.967,0.983)|1
VLSQVQLQESGPGLLKPSETLSLTCAVSGGSISGGYGWGWIRQPPGKGLEWIGSIYTSSG
NTYYNPSLKSRVTISTDTSNNQFSLKLNSVTAADTAVYYCAR
>V123RF-AQIB01153537.1-ighv |(1707, 2018)|2.99899600001|(1.000,1.000,0.999)|1
VQCEVQLVESGGGVVQPGGSLRLSCAASGFTFDDYGMHWVRQAPGKGLEWVSDISWDGDS
TYYADSVKGRFTISRDDAKNSLYLQMDSLRAEDTALYYCAKD
>V124RF-AQIB01153538.1-ighv |(4311, 4620)|2.99899600001|(1.000,0.999,1.000)|1
AQSQVQLVQSGAEVKKPGASVKLSCKASGYTFTSYNINWVRQAPGQVLEWMGWINPSNGN
TGYAQKFQGRVTMTRDTSTSTAYMELSSLISEDTAVYYCAR
>V125RF-AQIB01153538.1-ighv |(21429, 21738)|2.95577334931|(0.997,0.983,0.978)|1
AHSQVQLVQSGVEVKKPGASVKVSCKASGYTFSIYAISWVRQAPGQGLEWMGAIIPLVGI
TNYAQKFQGRVTITADTSTSTAYMELSSLRSEDTAVYYCAR
>V126RF-AQIB01153538.1-ighv |(31031, 31340)|2.89186884012|(0.982,0.940,0.977)|1
AHSQVQLVQSGAEGKKPGSSVKVSCKASGYTFTNSAVQWVRQSPEQGLEWIGVIIIGNDN
TGYAQKFQGRVTITMDVSMSTAYVELSSLRSEDMAVYYCAA
>V127RF-AQIB01153541.1-ighv |(19819, 20128)|2.94826014987|(0.984,0.973,0.992)|1
AHSQEQLVQSGAEVKKPGASVKVSCKASGYIFTGYIISWLRQAPGQGFEWMGGINPSDGS
TSYAQKFQGRVTMTRDTSTSTVYVELSSLRSEDTAVYYCAA
>V128RF-AQIB01153541.1-ighv |(23910, 24219)|2.98851611711|(1.000,0.989,1.000)|1
AHSEMQLVQSEAEVKKPGASVKVSCKVSGYTFTYPYLHWVRQTPGQGLEWMGWITPYNGN
TNYAQKFQDRVTITRDRSMSTAYMELSSLRSEDTAVYYCAR
>V129RF-AQIB01153543.1-ighv |(7057, 7368)|3.0|(1.000,1.000,1.000)|1
VQCEVQLVESGGGVVQPGGSLRLSCAASGFTFDDYAMGWVRQAPGKGLEWVSGISWNSGS
TGYADSVKGRFTISRDNAKNSLYLQMNRLRAEDTALYYCAKD
>V130RF-AQIB01153550.1-ighv |(2975, 3287)|2.94704014784|(0.963,0.996,0.997)|1
VLSQVQLQESGPGLVKPSETLSLTCAVSGYSISSAYDWSWIRQPPGKGLELIGYIYGNSA
STSYNPSLKSRVTISKDTSKNQFSLKLSSVTAADTAVYYCAR
>V131RF-AQIB01153553.1-ighv |(7961, 8270)|2.99696400065|(1.000,0.997,1.000)|1
VQGEVQLVESGGGLAKPGGSLRLSCSASGFTFSDYYMHWVRQASGKGLEWVSRINTGGGS
TWYADSVKGRFTISRENAKNTLYLQMDSLRAEDTAVYYCAR
>V132RF-AQIB01153553.1-ighv |(15671, 15986)|2.99899600001|(1.000,1.000,0.999)|1
VKCEAQLMESGGGLVQPGGSLRLSCAASGFTFSDHYMQWVRQAPGKGLEWVGLIRNKVDG
ETTDYAASVKGRVTISRDESKSITYLQMNNLKTEDTAVYYCAR
>V133RF-AQIB01153553.1-ighv |(22330, 22639)|2.98960007999|(1.000,0.990,1.000)|1
VQGEVQLVESGGGLVQPGGSLRLSCAASGFTFSSYAMHWARQAPGKGLEWVSYISSGGGN
TYYADSVKGRFTISRDNSKNTLSLQMNSLRAEDTAVYYCAR
>V134RF-AQIB01153555.1-ighv |(4669, 4978)|2.91224200392|(0.998,0.998,0.933)|1
VCAEVQLVQSGAEVKRPGESLRISCKTSGYSFTSSWISWVRQMPGKGLEWMGRIYPGDSD
TEYSPSFQGQVTISADKSISTTYLQWSSLKASDTATYYCAK
>V135RF-AQIB01153555.1-ighv |(23903, 24218)|3.0|(1.000,1.000,1.000)|1
VQCEVQLVESGGGLVQPGGSLRLSCAASGFTFSDHYMDWVRQAPGKGLKWVGRIRNKANS
YTTEYAASVKGRFTISRDDSKNTLYLQMSSLKTEDTAVYYCTR
>V136RF-AQIB01153555.1-ighv |(39959, 40271)|2.83639966024|(0.996,0.998,0.888)|1
VQCEVQLVESGGGLVQPEGSLRLSCVASGFTFSNYDMAWVRQAPGKGLEWVSRISSPSGS
STYYPDSVKGRFTISRENAKNTLYLQMNSLRAEDTAVYYCAR
>V137RF-AQIB01153556.1-ighv |(2509, 2815)|2.83868966826|(0.956,0.902,1.000)|1
VQCEVQLVEYGGGLVQPGGSLRHSCGFTFSDHYMSWVHPAPGKGLEWVGFMRNKANGGRT
EYAASVKGRFTISRDDSKSIASLQMSSLNTEDTVLYYCAR
>V138RF-AQIB01153557.1-ighv |(2988, 3297)|3.0|(1.000,1.000,1.000)|1
VQCEVQLVESGGGLVQPGGSLRLSCAASGFTFSDYWMYWVRQAPGKGLEWVSRISGSSSS
TYYPDSVKGRFTISRDNAKNTLYLQMDSLRAEDTAVYYCAR
>V139RF-AQIB01153557.1-ighv |(15135, 15441)|2.99899200002|(0.999,1.000,1.000)|1
VQCEVQLVESGGGLVQPGGTLRLSCAASGFTFGNSDLIWIRQAPGKGLEWVSYISSGGST
YYSDSVKGRFTISRENAKNTLYLQMSSLRVEDTAVYYCVR
>V140RF-AQIB01153558.1-ighv |(4802, 5117)|3.0|(1.000,1.000,1.000)|1
VQCEVQLVESGGGLVQPGGSLRLSCAASGFTFSNSWMSWVRQAPGKGLEWVARIKSKADG
GTAEYAASVKGRFTISRDDSKNTLYLQMNSLKTEDTAVYYCTI
>V141RF-AQIB01153561.1-ighv |(995, 1304)|2.9441290053|(0.984,0.966,0.996)|1
VQCEVQPVESGGGLVQPGGSLRLSCTASGFTFSSTRMNWIRQSPGKRLEWVADIKYDGSE
KYYVDSVKGRFTISRDNAKNSLYLQMNSLRAEDTAVYYCVR
>V142RF-AQIB01153564.1-ighv |(5745, 6054)|2.91676545902|(0.998,0.965,0.963)|1
VSAEVQLVQSGAEVKRPGESLKISCKTSGYSFTSYWISWVRQIPGKGLEWIGTIYPSDSD
TRYSPSFQGQVTISADKSISTAYLQWSSLKASDTATYYCAK
>V143RF-AQIB01153565.1-ighv |(7316, 7625)|2.9654447479|(0.998,0.988,0.981)|1
VCAEVQLVQSGAEVKKPGESLKISCKTSGYSFTSYWISWVRQIPGKGLEWIGAIDPSDSD
TRYSPSFQGQVTISADKSISTAYLQWSSLKSSDTATYYCAK
>V144RF-AQIB01153566.1-ighv |(30566, 30881)|2.99899200002|(0.999,1.000,1.000)|1
VQCEVQLVESGGGLVQPGGTLRLSCAASGFTFSNYWMDWVRQAPGKGLEWVGFIKNKADG
GTAEYAASVKGRFTISRDDSKNTLYLQMNSLKTEDTAVYYCTR
>V145RF-AQIB01156901.1-igkv |(3348, 3648)|3.0|(1.000,1.000,1.000)|1
AKCDIQMTQSPSSLSASVGDKVTITCQASQSISSWLAWYQQKPGKAPKLLIYKASSLESG
VPSRFSGSGSGTDFTLTISSLQPEDFATYYCQQHNSAP
>V146RF-AQIB01158310.1-igkv |(1186, 1501)|2.99499200002|(0.999,0.998,0.998)|1
TSGDIVMTQTPLSLPVTPGEPASISCRSSQSLLHSNGYTYLNWYLQKPGQSPLLLIYLVS
NRASGVPDRFSGSGSGTDFTLKISRVEAEDVGVYYCMQDIKLP
>V147RF-AQIB01162308.1-trbv |(21269, 21567)|2.47980056497|(0.887,0.827,0.806)|1
TQTPSHQVTQMGQEVILRCVPIPNHLYFYWYRQILGQKVEFLVIFFDNNISEKSEIFDDR
FSVGRPDGSDFTLKIKSTKLEDSAMYFCASSEATALQ
>V148RF-AQIB01162311.1-trbv |(7799, 8097)|1.99248654994|(0.934,0.908,0.568)|1
TQTPSHQVTQMGQEVILRCVPIPNHLNFYWYRQILGQKVEFLVYFYNDKILEKSEIFDDR
FSVERPDGSNFTLKIKSTKLEDSATYFCASSEATALQ
>V149RF-AQIB01162311.1-trbv |(11768, 12065)|2.99289600501|(0.999,1.000,0.994)|1
SLDTAVSQTPKYLVTQMGKKVSLKCEQNLGHDTMYWYKQDSKKLLKIMFSYNNKELTINE
TVSTRFSPESPDKAHLILHIKSLELGDSAVYFCASSQ
>V150RF-AQIB01162312.1-trbv |(4219, 4516)|3.0|(1.000,1.000,1.000)|1
PTDTGVTQTPKHLVMGMTNKKSLKCEQHLGHNAMYWYKQKAKKPPELMFVYQYEKLSINE
SVPSRFSPECSKSSLLYLHLQALQPEDSALYLCASSQ
>V151RF-AQIB01162312.1-trbv |(12163, 12454)|2.34916864998|(0.907,0.772,0.792)|1
PEVTQTPSHQVTQMGQEVILWCVPISNHFYFYWYRQILGQKVEFLVYFYNGEISEKSEIF
DDRFSVGRSDGVHFTLKIKSTKLEDSATYFCASSE
>V152RF-AQIB01162312.1-trbv |(18644, 18941)|2.88302193403|(0.992,0.990,0.921)|1
PLDTAVFQTPKYLVTQMGKKVSLKCEQNLGHDTMYWYKQDSKKLLKIMFIYSNEEPILNE
TVPNRFSPESLGKAHLNLHIKPVELGDSAVYFCASSQ
>V153RF-AQIB01162312.1-trbv |(22989, 23286)|2.99798400013|(1.000,1.000,0.998)|1
PTDTGVTQTPKHLVMGMTNKKSLKCEQHLGHNAMYWYKQKAKKPPELMFVYNYEKLSINE
SVPSRFSPECSKSSLLYLHLRALQPEDSALYLCASSQ
>V154RF-AQIB01162312.1-trbv |(33931, 34221)|2.95483600705|(0.988,0.983,0.984)|1
EAGVTQTPRSLIKMRGQQVTLSCSPISGHRSVSWYQQTPGQGLQLLFEYFSETQRQKGNF
PNRFSGRQFSNSHSEMNVSTLELGDSALYLCASSL
>V155RF-AQIB01162312.1-trbv |(41443, 41740)|2.997|(0.999,0.999,0.999)|1
PANADVTQSPKFQILKTGQNMTLKCAQDMNHNSMYWYRQDPGMGLRLIHYSATEDTTDTG
EVPDGYSVSRLNKKEFLLRLESAAPSQTSVYFCASSE
>V156RF-AQIB01162312.1-trbv |(55583, 55896)|2.99393200206|(0.999,1.000,0.995)|1
SLDTAVSQTPKYLVTQTGKNESLKCEQNLGHNAMYWYKQDSKKLLKIMFIYSNKEPVLNE
TVPNRFSPKSPDKAHLNLYITSVELGDSAVYFCASSQDTALQ
>V157RF-AQIB01162312.1-trbv |(59013, 59310)|2.99799600001|(0.999,1.000,0.999)|1
PMETGVTQTPRHLVMGMTNKKSLKCEQHLGHNAMYWYKQKAKKPPELMFIYNFKERAENN
SVPSRFSPECPDSSLLYLHLRALQPEDSALYLCASSQ
>V158RF-AQIB01162312.1-trbv |(70730, 71027)|2.99598400013|(0.998,1.000,0.998)|1
PVNAGVTQTPKFQILKTGQNMTLKCAQDMNHDRMYWYRQDTGMGLRLIHYSVGEGNTEKG
EVPSGYNASRLNKKDFLLRLELAAPSQTSIYFCASSE
>V159RF-AQIB01162312.1-trbv |(74325, 74625)|2.92123355494|(0.981,0.960,0.982)|1
HTDAGVSQSPRNKVTEEGKDVVLRCDPISGHIALYWYRQSLGKGLEFLIFFQGNDAPDKS
GLPSGRFSAERLEGSVSTLKIQRTQQGDSAVYLCASSS
>V160RF-AQIB01162313.1-trbv |(10114, 10411)|2.99698000014|(1.000,0.998,0.999)|1
HTGAGVSQSPSNKVTEKGNVALRCDPISGHAVLYWYRQNLGQGLEFLIYFQGTSAVDDSG
LRSDRFSATRPEGSVSTLKIQRTEQGDSATYFCASSL
>V161RF-AQIB01162313.1-trbv |(15115, 15427)|2.86761052253|(0.974,0.935,0.965)|1
PVDTGVTQSPTHLIKTRGQQVTLRCSPISGHTSVSWYQQAPGQGPQFIFKYANELRTSEG
NFPHRFSGRQFRDYHSEMNVSALELGDSALYLCASSLAQPGR
>V162RF-AQIB01162313.1-trbv |(17798, 18094)|2.99080001921|(0.999,1.000,0.992)|1
SVDSGVTQTPKHLITAIGQQVTLRCSPRSGDLSVYWYQQSLGQGLQFLIQYYNGAERAKG
NILERFSAQQFPDLHSELNLSSLELGDSALYFCASSL
>V163RF-AQIB01162314.1-trbv |(7361, 7658)|2.44948306169|(0.967,0.728,0.959)|1
HRDAEITQSPRHKITETGRQVTLKCHQTWNHNNMFWYRQDLGHGLRLIHYSYGVPDTNKG
EVPDGYSVSRSNEEDFPLTLESAASSQTSVYFCASSE
>V164RF-AQIB01162314.1-trbv |(17013, 17304)|2.37973564023|(0.948,0.809,0.791)|1
AGVAQSPRYKITEKSQAVAFWCDPISGHATLYWYRQILGQGPELLVQFQNDGVVDDSQLP
KDRFSAERLKGVNSTLRIQPAELGDSAMYLCASSL
>V165RF-AQIB01162316.1-trbv |(5792, 6099)|1.92138329415|(0.944,0.522,0.967)|1
HRDAGITQSPRYKVTEIGRQVTLTCHQTWNHSNMFWYRQDLGHGLNLIYYSAGASITDKG
EVPDGYAVSRSKTEDFPLTLESATRSQTSVYFCASSESTV
>V166RF-AQIB01162317.1-trbv |(23070, 23367)|2.99696400065|(1.000,1.000,0.997)|1
PVNAGVTQTPKFQVLKTGQSMTLQCAQDMNHDCMYWYRQDPGMGLRLIHYSFGKGSTDKG
EVPDGYNVTRSSTEDFTLRLESAAPSQTSVYFCASSY
>V167RF-AQIB01162317.1-trbv |(27290, 27591)|2.33105578959|(0.922,0.784,0.778)|1
AGVSQSPRYRVTKRGQDVALRCDPISGHDYLYWYQQAPGQGPAFLTYFQNDAQRDKSGLP
NDRFSAERPEGSLSTLKIQRTQQGDSAVYLCASSLATV
>V168RF-AQIB01162317.1-trbv |(35256, 35552)|2.99498000014|(0.998,1.000,0.997)|1
PVQAGVTQSPTHLIKTRGQQVTLRCSPISGHSSVYWYQQALGQGLQFILSYDEEEERDRG
TFPHRFSGHQFPNYSSELNVNASEVGDSALYLCASSL
>V169RF-AQIB01162317.1-trbv |(46598, 46898)|2.99280401921|(1.000,0.993,1.000)|1
HTGAGVSQSPSYKVTKRGQDVALRCDPISGHVALYWYRRTLGQGPELLTYFQNDAQPDKS
GLPSDRFSAERPEGSVSTLKIQRTQQGDSAVYLCASSL
>V170RF-AQIB01162318.1-trbv |(2955, 3251)|2.99899600001|(1.000,1.000,0.999)|1
NAGVTQTPKFQVLKTGQSMTVQCAQDMNHDYMFWYRQDPGMGLRLIHYSGAAGTTDKGEV
PSGYNVSRLNTEDFPLRLESAAPSQTSVYFCASSYST
>V171RF-AQIB01162319.1-trbv |(8580, 8876)|2.96730491943|(0.999,0.989,0.981)|1
PVDAGVTQSPTHLIKMRGQQVTLRCSPISGHNTVSWYQQALGQGPQFIFQYYEKEEREKG
NFPGRFSGHQFPNYSSELNVNASEMGDSALYLCASSL
>V172RF-AQIB01162319.1-trbv |(20243, 20534)|1.68354062657|(0.625,0.968,0.514)|1
AGVSQSPRYKVTKRGQDVALRCDPISGHEALYWYQQAPGQGPELLTYFNYKAQPDKSGLP
NDRFSAERPEGSFSTLTIQRTEQRDSAVYLRASSL
>V173RF-AQIB01162319.1-trbv |(25283, 25579)|2.97870083945|(0.999,1.000,0.981)|1
PVDAGVTQSPTHLIKTRGQQVTLRCSPISGHTSVSWYQQALGQGPQLIFQYYEKEEREKG
NFPGRFSGHQFPNYSSELNVNASEMGDSALYLCASSL
>V174RF-AQIB01162319.1-trbv |(33229, 33529)|2.78497797762|(0.993,0.878,0.968)|1
HTGAGVSQSPRYRVTKRGQEVAFRCDPISGHEYLYWYQQAPGQGPEFLTYFQNDAQLDKS
GLPSGRFSAERPEGSVSTLKIQRTQQGDSAMYLCASSL
>V175RF-AQIB01162319.1-trbv |(42071, 42367)|2.03595535254|(0.971,0.721,0.747)|1
PVEPGVTQSPTHLIKTRGQQVILRCSPISGHSSVSWYQQSLGQGPQFIFEHYEKEERGRG
NFPGRFSGRQFPNYSSELNVSALLLGDSALYLCASSL
>V176RF-AQIB01162319.1-trbv |(49518, 49833)|2.4896906607|(0.905,0.738,0.968)|1
LFLSAGPGNADVTQTPKFQLLKTGQSLTLQCAQDMNYNYMFWYRQDPGVGLRRIHYSVAA
GITDKGEVPNGYNVSRLNREDFPLRLESAALSQTSVYFCASSD
>V177RF-AQIB01162320.1-trbv |(3376, 3672)|2.99696400065|(1.000,1.000,0.997)|1
PVDTGVTQSPTHLIKMRGQQVTLRCSPISGHSSVYWYQQALGQGPQFIFQYYEKEERGRG
NFPDRFSGHQFPNYSSELNVSALLLGDSALYLCASSL
>V178RF-AQIB01162320.1-trbv |(10674, 10965)|2.99280401921|(1.000,1.000,0.993)|1
NAGVTQTPKFQVLKTGQSMIVQCAQNMNHDYMFWYRQDPGMGLRLIYYSVTAGITTKGEV
PNGYNVSRRNTEDFLLRLESAALSQTSVYFCASSY
>V179RF-AQIB01162320.1-trbv |(14920, 15220)|2.99696400065|(1.000,1.000,0.997)|1
HTGAGVSQSPRYKVIKKGQDVALRCDPISGHAALYWYQQALGQGPEFLTYFNYKDQPDKS
GLPNNRFSAERPEGSFSTLTIQRTEQQDSAVYLCASSL
>V180RF-AQIB01162320.1-trbv |(23602, 23892)|2.84354797504|(0.995,0.909,0.971)|1
DAGVTQSPMHLIKTRGQQVTLRCFPISGHNTVSWYQQTLGQGPQLIFQYYREEERGKGNF
PDRFSGRQFPNYSSELNVSALLLGDSALYLCASSL
>V181RF-AQIB01162320.1-trbv |(46876, 47173)|2.99899600001|(1.000,0.999,1.000)|1
HMDARITQSPRHKITETGTPVTLRCHQTENHRYMYWYRQDLGHGLRLIHYSYGVEDTDKV
EVSDGYSVSRSKTEDFLLTLESATRSQTSVYLCASSE
>V182RF-AQIB01162320.1-trbv |(57872, 58160)|1.96609294763|(0.963,0.606,0.848)|1
GVTQSPRYKITEKKQPVAFWCNPISGHNTLYWYRQNLGQGPELLVRYENEEAVDDSQLPK
DRFSAERLKGVDSTLRIQPAELGDSAVYLCASSL
>V183RF-AQIB01162320.1-trbv |(63466, 63766)|2.97058870068|(0.999,0.982,0.991)|1
HTDAGVIQSPRHEVTEMGKEVTLRCEPISGHNSLFWYRQTMMRGLEFLIYFNNKSPIDDS
GMPKDRFSAKMPNASFSTLKIQPSEPRDSAVYFCASSL
>V184RF-AQIB01162320.1-trbv |(66748, 67048)|2.92080401921|(0.976,0.976,0.969)|1
HTDAGVIQSPRHEVIEMGKEVTLRCEPISGHTYLFWYRQTMMRGLEFLIYFNNKSPIDDS
GMPKDRFSAEMPEASFSILKIQPSEPRDSAVYFCASSL
>V185RF-AQIB01162320.1-trbv |(82427, 82727)|2.90925050302|(0.985,0.997,0.937)|1
LIDAGVTQTPRHKVTEMGQEVTMRCQPILGHNTIFWYRQTMMRGLEFLIYFNNKSPIDDS
GMPKDRFSAEMPNASLATLKIQPSEPRDSAVYLCASGL
>V186RF-AQIB01162320.1-trbv |(89350, 89651)|2.42072636439|(0.949,0.912,0.734)|1
AGVTQFPSHRVIEKGQAVTLRCEPISGHDYLYWYRRVMGKELKFLIYFLRASMQDEFGMP
NKRFSAERTGGTYSTLKVQPAELEDSGVYFCASSQDTV
>V187RF-AQIB01162320.1-trbv |(94443, 94740)|1.77075101605|(0.892,0.608,0.693)|1
HGDVMVIQNPRYQVTQLGKPVTLSCSQNLNHRVMYWYQQKPSHAPKLLFHYYDKDFNNEA
DTPDNFQSRRPNTSFCFLDISSPGLEDAAVYLCASSK
>V188RF-AQIB01162320.1-trbv |(99411, 99711)|2.86123836336|(0.986,0.964,0.927)|1
SPGEEVTQTPKHLVKGEGQKAKLYCAPITGHSYVFWYQQVLRKEFKFLISFQNKNVFDET
GMPKERFSAKCPPNSPCSLEIQATKLKDSAVYFCASSQ
>V189RF-AQIB01162321.1-trbv |(2362, 2659)|2.994900005|(1.000,1.000,0.995)|1
TVDGGITQSPKYLFRKEGQNVTLSCEQNLNHDAMYWYRQDPGQGLRLIYYSQTVNDIQKG
DTAEGYSVSRERKQSFPLTVTSAQRNPTAFYLCASSI
>V190RF-AQIB01162321.1-trbv |(20388, 20688)|2.99899600001|(1.000,0.999,1.000)|1
STDTKVTQRPRLLVKANEQKAKMDCVPVKGHSYVYWYRKKLDEELKFLIYFQNEEIIQKA
EIINERFSAQCPQNSPCTLEIQSTESGDAALYFCASSK
>V191RF-AQIB01162321.1-trbv |(29352, 29657)|2.99596000066|(1.000,0.999,0.997)|1
SFHAEVTQTPGYLVKGKGQKTKMDCTPEKGHTFVYWYQQNQNKEFTFLISFQNEQVLQET
ELHKKRFSSQCPKNPPCSLEIPSSEPGDTALYLCASSQST
>V192RF-AQIB01162321.1-trbv |(41537, 41835)|2.85371268352|(0.993,0.988,0.904)|1
SMDADVTQTPRNKIAKTGKRIMLECSQTKSHDRMYWYRQDPGLGLRLIYYSFDVKDINKG
EISDGYNVSRQEQAKFSLSLESATPNQTALYFCATSD
>V193RF-AQIB01162321.1-trbv |(50021, 50318)|2.99593600205|(1.000,0.996,1.000)|1
LMEADIYQNPRHCVIGTGKKITLECSQTMGHDKMYWYQQDPGMELHLIHYSYGVNSTERG
DFSSESTVSRIRIEHFPLTLESASPSHTSQYLCASSE
>V194RF-AQIB01162321.1-trbv |(81250, 81547)|2.99194800078|(0.997,1.000,0.995)|1
PLEAQVTQNPRYLITVTGKKLTVTCSQNMNHEYMSWYRQDPGLGLRQIYYSINVEMVDKG
DIPEGYIVSRKEKRNFLLILESPSPSQTSLYFCASSL
>V195RF-AQIB01162321.1-trbv |(86583, 86890)|2.98032417086|(0.988,1.000,0.993)|1
LVDVKVTQSSRYLIKRTGEKVFLECVQDMDHERMFWYRQDPGLGLRLIYFSYDVKLNEKG
DIPEGYNVSREKKERFSLILGFASTNQTSMYLCASSLSTA
>V196RF-AQIB01162321.1-trbv |(106451, 106754)|3.0|(1.000,1.000,1.000)|1
SVFSAVVSQKPSRDVCQRGTSVTIQCQVDSQVTMMFWYRQQPGQSMTLIATANQGSEATY
ESGFVIDKFPISRPNLTFSTLTVSNTSPEDSSIYLCSVE
>V197RF-AQIB01086294.1-ighv |(20916, 21222)|2.89594695549|(0.950,0.997,0.958)|-1
VRCEVQRVESGGGLVQPGGSLRLSCAASGFTISSSWMNWDFQAPGKGLECVSHISSVGST
DYPDSIKGQFTISRDNTKNTLYVQMNSLRAEDMAVYYCAR
>V198RF-AQIB01128636.1-trav |(12150, 12438)|2.98989600501|(0.998,0.993,0.999)|-1
LSGELKVGQNPLFLSTQEGKNDTIYCNYSTASDRLYWYRQDPGKSLESLFVLLSNGAVKQ
EGRFMASLDTKARLSTLHITAALQDLSATYFCAV
>V199RF-AQIB01128637.1-trav |(37303, 37593)|2.24595295558|(0.812,0.656,0.991)|-1
VSSEDKVVQNPLSLVVHDGDTVTLNCSYEVVNFRSLLWYKQEKKAPTFLFMLTSSGIEKK
SGRLSSILDKKELFSILNITATQTRDSAVYLCAVE
>V200RF-AQIB01128637.1-trdv |(70372, 70673)|2.88929815127|(0.996,0.993,0.922)|-1
SGMAQTVTQSQPEMSVREAETVTLSCTYDTSESDYYLFWYQQPPSRQMTLIIRQEAYKQQ
NATENRFSVNFQKAAKSFSLKISDSQLGDAAMYFCAFM
>V201RF-AQIB01128637.1-trav |(79553, 79853)|2.99078801933|(1.000,0.998,0.993)|-1
SGMAQTVTQSQPEMSVREAETVTLSCTYDTSESYYYLFWYKQPPSRQMTLIIRQEAYKQQ
NATENRFSVNFQKAAKSFSLKISDSQLGDAARYFCAYR
>V202RF-AQIB01128641.1-trav |(41129, 41429)|2.31436670652|(0.892,0.721,0.828)|-1
SSVAQKVTQAQSSVSMTVGKAVTLNCQYETSWWSYYLFWYKQLPSKEMIFLIRQGSSEQN
ARNGRYSVNFEKAASSIALTISALQLEDSATYFCALWE
>V203RF-AQIB01128641.1-trav |(57380, 57679)|2.13830840782|(0.886,0.615,0.892)|-1
VNGQQIMQIPQYQHVQEGEDFTTYCNFSTTLNNIQWYKQRPGGHPVFLMMLVKSGEVKKQ
KRLTFRSGEAKKNSSLHITASQTTDVGSYFCAGHSAPQ
>V204RF-AQIB01128641.1-trav |(68354, 68644)|2.49204681934|(0.928,0.748,0.938)|-1
TIIDAKTTQPTSMDCAEGRAANLPCNHSTISANEYIHWYRQIHSQGPQYVIHGLKNKETN
AMASLIITEDRKSSTLILPHATLRDTAVYYCIVRV
>V205RF-AQIB01128641.1-trav |(105112, 105436)|1.85785711862|(0.649,0.901,0.562)|-1
VNSQQKNDDQQVKQNPPSLSVQEGGISILNCDYTNSMFDYFLWYKKYPAEGPTFLISIRS
VKDKNEEGRFTVFLNKSAKHLSLHIGASQPGDSAVYLCAASAQCSP
>V206RF-AQIB01128642.1-trav |(7440, 7727)|3.0|(1.000,1.000,1.000)|-1
LSGEDQVTQSPEALSLQEGESSSLNCSYTVSGLRGLFWYRQDPGKGPEFLFSLYSAGEEK
EKERLKATLTKKESFLHITGPKPEDSATYLCAVQ
>V207RF-AQIB01128642.1-trav |(19364, 19663)|2.84514288646|(0.968,0.906,0.988)|-1
VSGKQEVTQIPAALSVPEGDNLVLNCSFTDSAIYNLQWFRQDPGKGLTSLLLIQSSQREQ
TSGRLNASLDKSSGRSTLYITASQPTDSATYLCAVRHS
>V208RF-AQIB01128643.1-trav |(8686, 8977)|2.99696400065|(1.000,0.997,1.000)|-1
RTNGDSVTQTEGPVTLPERAALTLNCTYQTSYSAFIFWYVQYPKKEPELLLKSSENQETN
SRGFQASHVKSDSSFHLEKPSVQLSDSAVYYCVLR
>V209RF-AQIB01128643.1-trav |(11902, 12205)|2.99696400065|(1.000,1.000,0.997)|-1
SSMAQKVTQAQTEISVVEKEDVTLDCVYETRETTYYLFWYKQPPSGELVFLIRQNSFNEQ
NEINGRYSSNFQKSTSSFNLTITASQVMDSAVYFCALNE
>V210RF-AQIB01128644.1-trav |(117025, 117341)|2.55096171223|(0.936,0.856,0.829)|-1
QLVTQPEDQVTVAEGNPLTGKCTYSVSGNPYLFWYVQYPNQGLQFLLKYITGDNLVKGNY
GFEAEFNKSQTSFHLKKPSVLVSDSALYFCAVRDTLIGAAGGA
>V211RF-AQIB01128644.1-trav |(158071, 158361)|2.997|(0.999,0.999,0.999)|-1
MSRGDDVEQSLFLSVREGDISVINCTYTDSSSTYLYWYKQEPGAGLQLLIYILSNTDLKQ
DQRLTVLLNKKDKHLSLRIADTQTGDSAIYFCAES
>V212RF-AQIB01128644.1-trav |(168024, 168312)|2.10285874284|(0.889,0.945,0.587)|-1
VKSQKIEQNSETLNIQEGKTATLTCNYTNYSPSYLQWYRQDPGRSPVFLLLIRENEKEKW
KERLKVTFDTTLKKSLFHITASQPADSATYLCAL
>V213RF-AQIB01128644.1-trav |(203408, 203702)|3.0|(1.000,1.000,1.000)|-1
GINGDSVVQTEGQVLLSEGNSLIVNCSYESTQYPSLFWYVQYPGEGPQLLLKAMKDNDKE
SNKGFEATYRKETTSFHLEKDSVQESDSAVYFCALS
>V214RF-AQIB01128644.1-trav |(216592, 216885)|2.99286400565|(0.995,0.998,1.000)|-1
GSGKNQVEQSPQSLIILEGKNCTLQCNYTVSPFSNLRWYKQDTGKGLISLTIMTFSDNTK
SNGRYTATLDADTKQSSLYITAAQLSDSASYICVVS
>V215RF-AQIB01128644.1-trav |(232171, 232464)|2.99798400013|(1.000,0.998,1.000)|-1
VWGQQKEVEQNPGPLSVPEGATASLNCTYSNSAFQYFMWYRQYSRKGPQLLIYIYSSGNK
EDGRFTAQVDKSSKYISLFIRDSQPSDSATYFCAMS
>V216RF-AQIB01128644.1-trav |(237634, 237931)|2.82568944415|(0.990,0.985,0.890)|-1
GTRAQSVTQLDSQVSVSEGVPVLLRCNYSSSFPPNLFWYVQYPNQGLQLLLKYISGTALV
KGINGFKAEFKKSETSFHLTKASAHVSDAAEYFCAVS
>V217RF-AQIB01128644.1-trav |(243150, 243447)|3.0|(1.000,1.000,1.000)|-1
TARAQSVTQPDIHITVSEGASLELRCNYSYGATPSLFWYVQSPGQGLQLLLKYFSGDTLV
QGIKGFEAEFKRSQYSFNLRKPSVHWSDAAEYFCAAG
>V218RF-AQIB01128644.1-trav |(257060, 257353)|3.0|(1.000,1.000,1.000)|-1
VSRGESVGLHLPTVSVQEGDNSVINCTYSDSASDYFLWYKQESGKGPQSIIDIRSNMAKR
QGQRLTVLLNKTMKHLSLQIAATEPGDSAVYFCAEN
>V219RF-AQIB01128644.1-trav |(262905, 263206)|2.96640647223|(1.000,1.000,0.970)|-1
SGIAQKITQTQPAMFVQEKEAVTLDCTYDTSDQSYGLFWYKQPSSGEMIFLIRQESYDKQ
NATEGRYSLNFQKARKSVNLVISASQVEDSAMYFCAMR
>V220RF-AQIB01128644.1-trav |(280831, 281125)|2.99798400013|(1.000,1.000,0.998)|-1
RTRGDSVTQMEGPVTLSERAFLTINCTYTATGYPSLFWYVQYPGEGPQLLLKAVKTDEKG
SNKGFEATYRKETTSFHLKKDSVQESDSAVYFCALS
>V221RF-AQIB01128644.1-trav |(305369, 305662)|3.0|(1.000,1.000,1.000)|-1
VWSQQKEVEQNPGPLSVPEGATASLNCTYSNSAFQYFMWYRQYSRKGPQLLIYIYSSGNK
EDGRFTAQVDKSSKYISLFIRDSQPSDSATYFCAMS
>V222RF-AQIB01128644.1-trav |(340098, 340385)|2.99598400013|(0.998,1.000,0.998)|-1
VNSQQGEEDPQTLSIQEGENATMNCSYKTSINNLQWYRQDSGRSLVQLTLIRSNERQKNS
GRLRVTLDTSKKSSSLLITASRAADTASYFCATD
>V223RF-AQIB01144282.1-igkv |(6898, 7198)|2.90814200892|(0.995,0.930,1.000)|-1
AKCDIQLTQSPTFLSASVGDRATIACRASQSINKGLAWYQQKPGKVPKLLISYASDLYTG
VPSRFSGSGSGTDFTLTISSLQPEDAATYYCFQYNSYP
>V224RF-AQIB01144282.1-igkv |(55648, 55948)|3.0|(1.000,1.000,1.000)|-1
TTGQVILTQSPATLSLSPGERATLSCRASQSVSSYLAWYQQKPGQAPRLLIYSASSRATG
IPDRFSGSGSGTEFTLTISSLEPEDVGVYHCYQYYSGY
>V225RF-AQIB01144282.1-igkv |(64457, 64745)|1.96036413201|(0.638,0.834,0.631)|-1
TILTQSLAFVSATPGDKVTISCKASQDIDDDMNWYQQEPGEAPKLIIKDATTLVSGIPPR
FSGGRYGVDFTLTINNVESEDAAYYFCQQHDNFP
>V226RF-AQIB01144284.1-igkv |(30267, 30585)|2.9918400105|(1.000,0.994,0.998)|-1
AYGDIVMTQSPDSLAVSLGERVTINCKSSQSLLYSSNNKNYLAWYQQKPGQAPTLLISWA
STRESGVPNRFSGSGSGTDFTLTISGLQAEDVAVYYCQQHYSSP
>V227RF-AQIB01145361.1-ighv |(1895, 2208)|2.99899600001|(1.000,1.000,0.999)|-1
VQCEVQLVESGGGLVQPGRFLRLSCAASGFTFSNCYMHWAHQAQGRGLEWVSLMRKKANS
YATEYAVSVKDRFTISRDDSKNTLYLQMNSLKTEDTAVYYCA
>V228RF-AQIB01145362.1-ighv |(14904, 15217)|2.99899600001|(1.000,1.000,0.999)|-1
VQCEVQLVESGGGLVQPGRFLRLSCAASGFTFSNCYMHWAHQAQGRGLEWVSLMRKKANS
YATEYAVSVKDRFTISRDDSKNTLYLQMNSLKTEDTAVYYCA
>V229RF-AQIB01146043.1-iglv |(9768, 10077)|2.87146301927|(0.989,0.994,0.912)|-1
VDSETVVTQEPSLSVSSGGTVTITCGLSSGSVSTSNYPSWYQQTPGQAPRTLIYSTNTRP
SGVPDGFSGSILGNKAALTIMGAQADDESDYYCTLYMGSGI
>V230RF-AQIB01153518.1-ighv |(54, 366)|2.99480001|(0.995,1.000,1.000)|-1
VLSQVQLQESGPGLLKPSETLSLTCAVSGGSISDSYRWSWIRQPPGKGLEWIGNIYGNSA
STNYNPSLKSRVTISKDTSKNQFSLKLSSVTAADTAVYYCAR
>V231RF-AQIB01158235.1-ighv |(4748, 5060)|2.99799600001|(0.999,0.999,1.000)|-1
VQCEVQLVESGGGLVQPGGSLRLSCVASGFTFSDHYMHWVRQALGKGLEWVSRISSGSGS
STYYADSVKGRFTISRDNAKNTLYLQMNSLRAEDTAVYYCAR
>V232RF-AQIB01159121.1-igkv |(3373, 3688)|2.98366002957|(0.999,0.993,0.992)|-1
SSGDVVMTQSPLSLPVTPGQPASISCRSSQSLVHSDGNTYLSWFQQKPGQPPRLLIYQVS
NRDSGVPDRFSGSGAGTDFTLKISRVEAEDVGVYYCVQGTKVP
>V0RF-AHZZ01030316.1-trgv |(43861, 44177)|2.98451211712|(0.999,0.988,0.998)|1
SQKSSNLEGRTKSVTRPTGSSAEITCDLPEVSSFYIHWYLHQEGKAPQRLLYYDSSNSRV
VLESGISPGKYDTYGSTRRRNLRLILRNLIENDSGVYYCANWD
>V1RF-AHZZ01035404.1-trdv |(2190, 2491)|2.86843549911|(0.992,0.975,0.922)|1
SGMAQTVTQSQPEMSVREAETMTLSCTYDTSESNYYLFWYKQPPSRQMILIIRQEAYKQQ
NATENRFSVNFQKAAKSFSLKISDSQLGDAAMYFCAFM
>V2RF-AHZZ01035404.1-trav |(11684, 11986)|3.0|(1.000,1.000,1.000)|1
SGMAQTVTQSQPEMSVQEAETVTLSCTYDTSDSDYYLFWYKQPPSRQMILIIRQEAYKQQ
NATENRFSVNFQKAAKSFSLKISDSQLGDAAMYFCAYRS
>V3RF-AHZZ01035404.1-trav |(35215, 35503)|2.99696400065|(1.000,0.997,1.000)|1
LSGELKVGQNPLFLSTQEGKNYTIYCNYSTASNRLYWYRQDPGKSLESLFVLLSNGAVKQ
EGRLMASLDTKARLSSLHITAALQDLSATYFCAV
>V4RF-AHZZ01040804.1-igkv |(26742, 27054)|2.87344961302|(0.997,0.993,0.912)|1
CNGDIVLTQSPASLAVSPGQRATITCRASESVSLLGINFIHWYQQKPGQPPKLLIYQASN
KDTGVPARFSGSGSGTDFTLTINPVEADDAANYYCLQSKDLP
>V5RF-AHZZ01040804.1-igkv |(44403, 44694)|2.99899600001|(1.000,0.999,1.000)|1
IVLTQSPTSMAVSQGERVTISCTASSSVSTSYLHWYQQKPGFPPRLLVYRTSSLASGVPA
RFSGSGSGTSYTLTISSMEAEDAANYYCQQGNSIP
>V6RF-AHZZ01042100.1-igkv |(22346, 22662)|2.8860082676|(0.988,0.921,0.995)|1
TSGDILLTQTPLSLPVTPAEPASISCRSSQSLLHSNGNTYLHWYLQKPGQSPQLLIYEVS
NRASGVPERFSGSGSGTDFTLKISLVEAEDVGVYYCMQTTQWP
>V7RF-AHZZ01042101.1-igkv |(1294, 1609)|2.96323565456|(0.996,1.000,0.970)|1
SSGDIVMTQTPLSLPVTLGEPTSISCRSSQSLVYSDGKTYLHWYLQKPGQSLQLLMYLVS
KRASGVPDRFSGSGSGTDFTLKISRVEAEDVGVYYCMQTLRSP
>V8RF-AHZZ01042101.1-igkv |(23302, 23620)|2.88199738585|(0.998,0.917,0.993)|1
SSGDIVMTQTPLFLPVTLGEPASISCRSSQSLLDSEDGNTYLDWYLQKPGQSPQLLIYEV
SNRASGVPDRFSGSGSDTDFTLKISRVEAEDVGVYYCMQALEFP
>V9RF-AHZZ01064615.1-ighv |(3396, 3696)|2.99899600001|(1.000,0.999,1.000)|1
VQCEVQLVESGGGLVQPGGSLRLSCAASGFTFSSYAMQWVHQTPGKGLEWVSAIGPGGDT
YYADAVKGRFTISRDNAKNSLYLQMNSLRAEAVYYCAR
>V10RF-AHZZ01064617.1-ighv |(710, 1019)|2.95106587284|(0.977,0.977,0.999)|1
AHSQEQLVQSGAEVKKPGASVKVSCKASEYTFTSYVISWLRQAPGQGFEWMGGINPSDGS
TSYAQKFQDRVTITADMSTSTVYMELSSLRSEDTAVYYCAR
>V11RF-AHZZ01064625.1-ighv |(10295, 10604)|2.98666005261|(0.998,0.989,1.000)|1
VLSQVQLQESGPAVVKPSQTLSLTCAVSGGSISSGYDWSWIRQSPGKALEWIGYISYSGS
TNYNPSLKSRVTISRDTSKNQFSLKLSSVTAADTAVYYCAR
>V12RF-AHZZ01064628.1-ighv |(242, 554)|2.93792258934|(0.987,0.957,0.998)|1
VLSQVKLQQWGEGLVKLSETLSLTCAVYGGSISGYYYWSWIRQAPGKGLEWIGSIYSSGS
STYYNPSLKSRVTISTDTSKNQFSLKLSSVTAADSAVYYCAR
>V13RF-AHZZ01064636.1-ighv |(1268, 1580)|2.93041612211|(0.975,0.986,0.970)|1
VLSQVKLQQWGEGLVKPSETLSLTCAVYGGSISGYYYWSWIRQPPGKGLEWIGNIDGNSA
STNYNPSLKNRVTISKDTSKNQFSLKLSSVTAADSAVYYCAR
>V14RF-AHZZ01069449.1-ighv |(25634, 25949)|3.0|(1.000,1.000,1.000)|1
VQCEVQLVESGGGLVQPGGSLRLSCAASGFTFSNYWMNWVRQAPGKGLEWVGFIKNKADG
GTAAYAESVKGRFTISRDDSKNTLYLQMNSLKTEDTAVYYCTR
>V15RF-AHZZ01069451.1-ighv |(7153, 7468)|3.0|(1.000,1.000,1.000)|1
VQCEVQLVESGGGLVQPGRSLRLSCAASGFTFSNYYMHWVRQAQGKGLEWVGLIRNKANS
YTTEYAAAVKGRFTISRDDSKNTLYLQMSSLKTEDTAVYYCTT
>V16RF-AHZZ01069453.1-ighv |(22421, 22735)|2.90974548772|(0.997,0.933,0.996)|1
VFSQVTLKESGPALVKPTQTLTLTCTFSGFSLSTSGMRVSWIRQPPGKALEWLARIDWDD
DKYYSTSLKSRLTISKDTSKNQVVLTMTNMDPVDTATYYCARR
>V17RF-AHZZ01069455.1-ighv |(6977, 7286)|2.99294800078|(0.996,0.998,0.999)|1
VQCEVQLVESGGGLVQPGGSLRLSCAASGFTFSSYYMYWIRQAPGKGLQWVSAINTGGGS
TWYTDSVKGRFTISRENAKNTLYLQMNSLRAEDTAVYYCAK
>V18RF-AHZZ01069455.1-ighv |(20090, 20405)|2.88130902447|(0.994,0.915,0.997)|1
VQCEMQLVESGGGLAQPGGSLRLSCAASGFTFSDHYMHWVRQAPGKGPEWVGFIRNKAKG
GTAEYAASVKGRFTISRDDSKNVTYLQMNSLKTEDTAVYYCAR
>V19RF-AHZZ01069455.1-ighv |(33477, 33791)|2.87690290057|(0.996,0.929,0.972)|1
VLSQVTLKESGPALVKPTQTLTLTCTFSGFSLSTSGMCVSWIRQPPGKALEWLARIDWDN
DKYYSTSLKSRLTISKDTSKNQVVLTMTNMDPVDTATYYCARV
>V20RF-AHZZ01069455.1-ighv |(52071, 52380)|2.43482657607|(0.996,1.000,0.713)|1
VLSQVQLQESGPGLVKPSETLSLTCAVSGGSISSYWWGWIRQPPGKGLEWIGHIYGSSGS
NYLNPSLKSRVTISIDTSKNQLSLKLSSVTAADTAVYYCAR
>V21RF-AHZZ01069456.1-ighv |(9988, 10297)|3.0|(1.000,1.000,1.000)|1
VQCEVQLVESGGGLVQPGGSLRLSCAASGFTFSSYGMHWARQAPGKGLEWVSAINTGGGS
TWYADSVKGRFTISRENAKNTLYLQMNSLRAEDTAVYYCAK
>V22RF-AHZZ01091598.1-ighv |(21923, 22232)|2.95754165691|(0.995,0.966,1.000)|1
AHAQVQLVQSGAQIKQPGASVKLSCKASGYTFTSYYMHWVRQAPGQGLEWIGLISPYNGN
KGYAQNFQGRVTITTDTSTSTGYMELSSLRSEDTAVYYCTR
>V23RF-AHZZ01091599.1-ighv |(2219, 2528)|3.0|(1.000,1.000,1.000)|1
VQCEVQLVESGGGLSKPGGSLRLSCAASGFTFSDYNMDWVRQASGKGLEWVSSINTGGGS
TWYADSVKGRFTISRENAKNTLYLQMNSLRAEDTAVYYCAR
>V24RF-AHZZ01091599.1-ighv |(13841, 14150)|2.93543530231|(0.993,1.000,0.950)|1
VQCEVQLVESGGGLVQPGGSLRLSCAASGFTFSDNYMEWVRQAPGKGLQWVGQINPNGGT
TFLMDSVKGRFTISRDNAKNTLYLQTSSLNTEDTAVYYCTR
>V25RF-AHZZ01091600.1-ighv |(4723, 5037)|2.27752052158|(0.976,0.923,0.682)|1
VLSQVTLKESGPALVKPTQTLTLTCTFSGFSLTTSGMGVGWIRQPPGKALEWLAHIYWDD
DKRYSPSLKSRLTISKDTSKNQVVLTMTNMDPVDTATYYCARR
>V26RF-AHZZ01091603.1-ighv |(4407, 4716)|2.99698000014|(0.998,0.999,1.000)|1
VLSQVQLQESGPGLVKPSETLSLTCAVSGGSISSNYWNWIRQPPGKGLEWIGRIYGGSGS
TDYSPSLKSRVTISTDTSKNQLSLKLSSVTAADTAMYYCAR
>V27RF-AHZZ01097944.1-iglv |(5376, 5682)|3.0|(1.000,1.000,1.000)|1
DSETVVTQEPSLSVSSGGTVTLTCGLSSGSVSTSNYPSWYQQTPGQAPRTLIYRTNTRPS
GVPDRFSGSILGNKAALTITGAQADDESDYYCMLYMGSGI
>V28RF-AHZZ01097949.1-iglv |(49069, 49372)|2.02104929642|(0.858,0.556,0.938)|1
VQAGLTQPPSVSKGLRQTATLTCTGNSNNVGNQGAAWLQQHQGHPPKLLSYRNNNRPSGI
SERFSASRSGNTASLTITGLQPEDEADYYCSAWDSSLSA
>V29RF-AHZZ01097949.1-iglv |(59447, 59759)|3.0|(1.000,1.000,1.000)|1
SWAEVVFTQPHSVSGSPGQTVTISCTRSSGSIDSKYVQWYQQRPGSAPTTVIYEDNKRPS
GVPDRFSGSIDSSSNSASLTISGLNSEDEADYYCQSADGSYN
>V30RF-AHZZ01098200.1-trav |(876, 1169)|2.99798400013|(1.000,1.000,0.998)|1
VWSQQKEVEQNPGPLSVPEGATASLNCTYSNSAFQNFMWYRQYSRKGPQLLIYTYSSGNK
EEGRFTAQVDKSSKYISLFIRDSQPSDSATYFCAMS
>V31RF-AHZZ01098200.1-trav |(35496, 35783)|2.99798400013|(1.000,1.000,0.998)|1
VNSQQGEEDPQTLSIQEGENATMNCSYKTSINNLQWYRQDSGRSLVQLILICSNEREKNS
GRLRVTLDTSKKSSSLLITASRAADTASYFCATD
>V32RF-AHZZ01098200.1-trav |(47312, 47603)|2.97480001921|(0.989,0.990,0.996)|1
RTNGDLVTQTEGPVTLPERAALTLNCTYQTSYSAFIFWYVQYPNKEPELLLKSSENQETN
SRGFQASHDKSDSSFHLEKPSVQLSDSAVYYCVLR
>V33RF-AHZZ01098200.1-trav |(50539, 50842)|2.99188400513|(0.995,1.000,0.997)|1
SSMAQKVTQAQTEISVVEKEDVTLDCVYETRENTYYLFWYKQPPSGELVFLIRRNSFDEQ
NEMNGRYDSNFQKSTSSFNLTITASQVVDSAVYFCALNE
>V34RF-AHZZ01098200.1-trav |(85982, 86269)|2.97149304411|(0.996,0.977,1.000)|1
LSGEDQVMQSPEALSLQEGESSSLNCSYTVSGLRGLFWYRQDPGKGPEFLFSLYSAGEEK
EKERLKATLTKKESFLHITGPKPEDSATYLCAVQ
>V35RF-AHZZ01098942.1-ighv |(3874, 4183)|2.99899600001|(1.000,1.000,0.999)|1
VLSQVQLQESGPGLVKPSETLSLTCAVSGGSFSSNYWSWICQPPGKGLEWIGGIYGSGGS
TYYNPSLKNRVTISTDTSKNQFSLKLSSVTAADTAVYYCAR
>V36RF-AHZZ01098950.1-ighv |(183, 495)|3.0|(1.000,1.000,1.000)|1
VLSQVQLQESGPGLVKPSETLSLTCAVSGYSISSGYYWGWIRQPPGKGLEWIGYIYGNSA
STYYNPSLKSRVTISKDTSKNQFSLKLSSVTAADTAVYYCAR
>V37RF-AHZZ01099970.1-iglv |(6343, 6653)|3.0|(1.000,1.000,1.000)|1
SWAEVVFTQPHSVSGSPGQTVTISCTRSSGSIDSKYVQWYQQRPGSAPTTVIYNDDQRPS
GVPDRFSGSIDSSSNSASLTISGLKSEDEADYYCQSADSSS
>V38RF-AHZZ01099973.1-iglv |(38400, 38710)|2.99899600001|(1.000,0.999,1.000)|1
SWAQSVLTQPPSVSGAPGQRVTISCTGSSSNIGAGYYVSWYQQLPGTAPKLLIYENNKRP
SGVSDRFSGSKSGTSASLAITGLQAEDEADYYCQSYDSSLS
>V39RF-AHZZ01100290.1-ighv |(204, 517)|2.9918720041|(1.000,0.996,0.996)|1
VQCEVQLVESGGGLVQPGRFLRLSCAASGFTFSNYYMHWAHQAQGRGLEWVSLMRKKANS
YTTEYAVSVKDRFTISRDDSKNTLYLQMNSLKTEDTAVYYCA
>V40RF-AHZZ01104241.1-igkv |(8110, 8412)|2.96516337871|(1.000,1.000,0.969)|1
STGDVVMTQSPLSLPVTPGEPASISCRSSQSLLHSSGNTYLSWFQQKPGQSARRLIYKVS
NRDSGVPDRFTGSGAGTDFTLKISRVEAEDVGVYYCMEG
>V41RF-AHZZ01104241.1-igkv |(24888, 25186)|2.76732331769|(0.997,0.852,0.999)|1
SKGEIVLTQSPAFRSVTLKEKVTITCQASQSIGSSLHWYQQKPDRSPKLLIKYASQSISG
VPSRFSGSGSGTDFTLTINSLEAEDAATYYCQQSSSL
>V42RF-AHZZ01104241.1-igkv |(53164, 53464)|3.0|(1.000,1.000,1.000)|1
TSGEIVLTQSPATLSLSPGERATLSCRASQSVGSSLAWYQQKPGQAPRLLIYGASSRATG
IPDRFSGSGSGTEFTLTISSLEPEDFVVYYCQKYSSSP
>V43RF-AHZZ01104241.1-igkv |(58624, 58924)|3.0|(1.000,1.000,1.000)|1
VRCDIQMTQSPSFLSASVGDRVTITCQASQSISNDLAWYQQKPGKSPTLLIYDATNLHTG
VPSRFSGSGSGADYSLTISSLELEDFAAYYCQQEYSYP
>V44RF-AHZZ01104243.1-igkv |(11240, 11555)|1.64629266398|(0.506,0.641,0.622)|1
SIGDIELTQTLHSLPVNPGEPASISCQSSQSLLHSDGKTYFYWFLRKPGQHPRLPIYWVS
NWNTGAPDRFSGSGAGTDFTLKISVVEAEDVGVYYYTQVTHWP
>V45RF-AHZZ01104243.1-igkv |(37856, 38148)|2.85365853484|(1.000,0.896,1.000)|1
SRGDIVMTQSPAFVSVTPGEKVTITCQASEGISNYLHWYQQKPDQAPKLFIQYASQSISG
VPSRFTGSGSGTDFTFTISSLEVEDAATYYCQQGN
>V46RF-AHZZ01104243.1-igkv |(54085, 54379)|2.99493200206|(1.000,0.996,0.999)|1
RGDIQMTQSPSSLSASVGDRVTITCRASQSFSSLAWYQQKPGKAPKLLIYSASSLQSGVP
SRFSGSKSGTDFTLTISSLQPEDVASYYCQQYYSYP
>V47RF-AHZZ01104243.1-igkv |(69226, 69518)|3.0|(1.000,1.000,1.000)|1
AKCDIQMTQSPSSLSASVGDRVTITCRASQTISSYLAWYQQKPGKVPKLLIYAASSLESG
VPSRFSGSGSGTEFTLTISSLQPEDFATYYCQQHN
>V48RF-AHZZ01104760.1-ighv |(306, 615)|2.96265347361|(1.000,0.967,1.000)|1
VQGEVQLVESGGGLAKPGGSLRLSCAASGFTFSDHYMHWVRQAPGKGLEWISAINSGGGS
TYYAESVKGRFTISRENAKNTLYLQMDSLRAEDTAVYYCAR
>V49RF-AHZZ01104761.1-ighv |(4083, 4398)|3.0|(1.000,1.000,1.000)|1
VKCEAQLMESGGGLVQPGGSLRLSCAASGFTFSDHYMQWVRQAPGKGLEWVGLIRNKADG
ETTDYAASVKGRVTTSRDDSKSITYLQMNNLKTEDTAVYYCAR
>V50RF-AHZZ01104763.1-ighv |(4374, 4683)|2.99899600001|(1.000,0.999,1.000)|1
VQCEVQLVESGGGLAKPGGSLRLSCAASGFTFSDYYMDWVRQAPGKALEWVSGISNTGGS
TWYADSVKGRFTISRENAKNTLYLQMSSLRAEDTAVYYCAR
>V51RF-AHZZ01105091.1-igkv |(457, 757)|2.99396400065|(0.997,1.000,0.997)|1
ARCDIQMNQSPSSLSASVGDTATITCRASQGISNNLAWYQQKPGKAPKLLIYAASSLESG
VPSRFSGSGSGTEFTLTISSLQPEDFAAYYCQQYNSLP
>V52RF-AHZZ01107544.1-trav |(5301, 5591)|2.994900005|(1.000,1.000,0.995)|1
VNGENVEQHPSTLSVQEGDSSVIKCTYSDSASNYFPWYKQELGKGPQFIIDIRSNEHEKK
DQRITVLLNKTAKHFSLHITETQPGDSAVYFCAAS
>V53RF-AHZZ01107544.1-trav |(27803, 28091)|2.99899600001|(1.000,0.999,1.000)|1
VWSQQKVEQSSGPLSVPEGAIASLNCTYSDSGSQSFFWYRQYSGQSPELLMSTYSSGDKE
DGRFTAQLNRASQYVSLLIRDSQLSDSATYLCAV
>V54RF-AHZZ01107544.1-trav |(34317, 34614)|2.93850772085|(0.999,0.995,0.953)|1
GTRAQSVTQLDSQVSVSEGVPVLLRCNYSSSFSPTLFWYVQYPNQGLQLLLKYISGTTLV
KGINGFEAEFKKSETSFHLTKASAHVSDAAEYFCAVN
>V55RF-AHZZ01107544.1-trav |(53747, 54040)|3.0|(1.000,1.000,1.000)|1
VSRGESVGLHLPTVSVQEGDNSVINCTYSDSASDYFLWYKQESGKGPQSIIDIRSNMAKR
QGQRLTVLLNKTMKHLSLQIAATEPGDSAVYFCAEN
>V56RF-AHZZ01107545.1-trav |(4983, 5284)|2.97164868712|(0.983,1.000,0.990)|1
SGIAQKITQTQPAMFVQEKEAVTLDCTYDTSDQNYGLFWYKQPSSGEMIFLILQMSYDKQ
NATEGHYSLNFQKARKSVNLVISASQVGDSATYFCAMR
>V57RF-AHZZ01107545.1-trav |(23299, 23593)|3.0|(1.000,1.000,1.000)|1
RTRGDSVTQMEGPVTLSERAFLTINCTYTATGYPSLFWYVQYPGEGPQLLLKATKTDEKG
SNKGFEATYRKETTSFHLKKDSVQESDSAVYFCALS
>V58RF-AHZZ01108247.1-ighv |(744, 1053)|2.97166884009|(0.998,0.980,0.995)|1
AHSEVQLVQSGSEVKKPGATVKISCKASGYTFIDYYLHWVRQAPGKGLEWMGGVDPEDGE
ADYAQKFQGRVTITADTSTDTAYMELSSLRSEDTAVYYCAR
>V59RF-AHZZ01109397.1-igkv |(45, 345)|3.0|(1.000,1.000,1.000)|1
ARCDIQMTQSPSSLSASVGDRVTITCRASQGISSYLNWYQQKPGKAPKLLIYDATTLQSG
VPSRFSGSGSGTEFTLTISSLQPEDFAVYYCQQRNSYP
>V60RF-AHZZ01109397.1-igkv |(20176, 20476)|2.99899600001|(1.000,0.999,1.000)|1
ARCDIQMTQSPSSLSASVGDRVTITCQASQGISSWLSWYQQKPGKAPKLLLYKASGLQSG
VPSRFSGSGSGTEFTLTISSLQPEDFATYYCQQFSSAL
>V61RF-AHZZ01109398.1-igkv |(3225, 3525)|3.0|(1.000,1.000,1.000)|1
TTGEIVMTQSPATLSLSPGERATLSCRASQSVSSRLAWYQQKPGQAPRLLIYDASSRATG
IPDRFSGSGSGTEFTLTISSLEPEDVGVYYCQQSYSWP
>V62RF-AHZZ01110760.1-ighv |(1676, 1985)|2.93434247428|(0.988,0.992,0.958)|1
VLSQVQLQESGPGLVKPSETLSLTCAVSGASISSNWWSWIRQAPGKGLEWIGEINGNSGS
TNYNPSLKSRVTISKDASKSQFSLKLSSVTAADTAVYYCAR
>V63RF-AHZZ01111404.1-ighv |(10609, 10903)|2.20259399476|(0.987,0.899,0.673)|1
AQSQVQLVQSGAEVKKPGASVKVSCKASGYTFSTYAISWVRQAPGQGLEWMGGIIPLVGI
TNYAQKFQGRDTSTSTAYMELSSLRSEDTAVYYCAR
>V64RF-AHZZ01111405.1-ighv |(9460, 9769)|2.96328365264|(0.998,0.996,0.972)|1
AHSQVQLVQSGAEVKQPGSSVKVSCKASGYTFTNSAMQWVRQTPGQGLEWIGWIIIGNGN
TNYAQKFQGRVTITRDTSTSTGYMELSSLRSEDTAVYYCAA
>V65RF-AHZZ01113072.1-ighv |(329, 638)|2.95396799578|(1.000,0.994,0.965)|1
VQCEVQLVESGGGLVQPGVSLRLSCAASGFTFSSTRMNWIRQAPGKKLEWVADIKYDGSE
KYYVDSVKGRFTISRDNAKNSLSLQMNSLRAEDTAVYYCVR
>V66RF-AHZZ01117753.1-igkv |(3232, 3532)|3.0|(1.000,1.000,1.000)|1
ARCDIQMTQSPSSLSASVGDRVTITCRASQGISTYLNWYQQKPGKAPKLLIYAASRLESG
VPPRFSGSGSGTEFTLTISSLQPEDFATYYCLQYKSDP
>V67RF-AHZZ01117754.1-igkv |(5922, 6221)|3.0|(1.000,1.000,1.000)|1
TTGEIVMTQSPATLSLSPGERATLSCRASQSVSSYLAWYQQKPGQAPRLLIYGASSRATG
IPDRFSGSGSGTEFTLTISSLEPEDVGVYYCQQYNNWN
>V68RF-AHZZ01117754.1-igkv |(31202, 31502)|2.80662291491|(0.923,0.942,0.945)|1
TTGEIVMTQSPATLSLSPGEGATLSCRASQSVGSYLAWYQQKPGQAPKLLIHSAYFRATG
IPDRFSGSGSRTEFTLTISSLEPEDVGVYHCQQYNDLP
>V69RF-AHZZ01123648.1-ighv |(7375, 7669)|2.20259399476|(0.987,0.899,0.673)|1
AQSQVQLVQSGAEVKKPGASVKVSCKASGYTFSTYAISWVRQAPGQGLEWMGGIIPLVGI
TNYAQKFQGRDTSTSTAYMELSSLRSEDTAVYYCAR
>V70RF-AHZZ01124687.1-ighv |(302, 609)|2.9700882474|(1.000,1.000,0.973)|1
AHAQVQLVQSGPEVKQPGASVKVSCKASGYTFTSYGMNWVRQAHGQRLEWMGWINTDSGN
PTYAQGFKERFTFSMDTSISTAYLQISSLKAEDTAVYYCA
>V71RF-AHZZ01129142.1-ighv |(1012, 1321)|3.0|(1.000,1.000,1.000)|1
VLSQVQLQESGPGVVKPSETLSLTCAVSGGSISSYWWGWIRQPPGKGLEWIGYIYGSGSS
TNYNPSLKSRVTISKDTSKNQFSLKLSSVTAADTAVYYCAR
>V72RF-AHZZ01130977.1-trav |(3875, 4175)|2.12618879697|(0.900,0.639,0.840)|1
FSVAQKVTQAQSSVSMPVGKAVTLNCQYETSWWSYYLLWYKQFPGKEMIFLIRQGSSEQN
ARNGRYSVNFQKAASSIALTISALQLEDSATYFCALWE
>V73RF-AHZZ01143621.1-igkv |(14221, 14507)|2.94562999772|(1.000,0.967,0.984)|1
IVMTQSPATLSLSPGERATLSCRASQSVSSRLAWYQQKPGEAPRLLIYDASSRATGIPAR
FSGSGSGTDFTLTISSLEPEDVAVYFCQQESNW
>V74RF-AHZZ01150255.1-ighv |(7064, 7379)|2.9958720041|(0.996,1.000,1.000)|1
VQCEVQLLEYGGGLVQPGRSLRLSCAVSGFTFSDHYMSWVRQAPGKGPEWVGFMRNKANG
GRTEYAASVKGRFTISRDDSKSTASLQMSSLKTEDTAVYYCAT
>V75RF-AHZZ01169213.1-igkv |(5365, 5663)|2.72322816252|(0.989,0.856,0.952)|1
TTGEIVMTQSPATLALSPGERATLSCRASQSVSSYLAWYQQKPGQAPRLLIYGASSRATG
IPDRFSGSGSGTEFTLTISSLEPEDVGVYFCLQSSNW
>V76RF-AHZZ01176978.1-igkv |(12153, 12453)|3.0|(1.000,1.000,1.000)|1
ARCDIQMTQSPSSLSASVGDKVTITCHASQGISSWLSWYQQKPGKAPKLLIYKASSLQSG
VPSRFSGSGSGTDYTLTISSLQPEDFATYYCQQDSSSP
>V77RF-AHZZ01198213.1-trav |(10234, 10524)|2.99798400013|(1.000,1.000,0.998)|1
MSRGEDVEQSLFLSVREGDISVINCTYTDSSSTYLYWYKQEPGAGLQLLTYILSNMDLKR
DQRVTVLLNKKDKHLSLRIADTQTEDSAIYFCAES
>V78RF-AHZZ01198214.1-trav |(2660, 2948)|2.06557688782|(0.967,0.942,0.591)|1
VKSQKIEQNSEALNIQEGKTATLTCNYTNYSPSYLQWYRQDPGRGPVFLLLIRENEKEKW
KERLKVTFDTTLKQSLFHITASQPADSATYLCAL
>V79RF-AHZZ01198214.1-trav |(53657, 53950)|3.0|(1.000,1.000,1.000)|1
GSGKNQVEQSPQSLIILEGKNCTLQCNYTVSPFSNLRWYKQDTGKGPISLTIMTFSENTK
SNGRYTATLDADTKQSSLHITAAQLSDSASYICVVS
>V80RF-AHZZ01198216.1-trav |(1076, 1382)|3.0|(1.000,1.000,1.000)|1
VWSQQKEVEQDPGPFSVPEGATVTFNCTYSNSASQSFFWYRQDSRKEPKLLMSVYSSGNE
DGRFTAQLNRASQYISLLIRDSQLSDSATYLCAVYTQCSP
>V81RF-AHZZ01198216.1-trav |(6535, 6832)|2.99798400013|(1.000,0.998,1.000)|1
GTRAQSVTQLDSQVSVSEGVPVLLRCNYSSSVSPYLFWYVQYPNQGLQLLLKYTSGTTLV
KGINGFEAEFKKSETSFHLTKASAHVSDAAEYFCAVN
>V82RF-AHZZ01040804.1-igkv |(3190, 3490)|2.99799600001|(0.999,0.999,1.000)|-1
TTGQVILTQSPATLSLSPGERATLSCRASQSVSNYLAWYQQKPGQAPRLLIHSASSRATG
IPDRFSGSGSGTEFTLTISSLEPEDVGVYHCYQYYSGY
>V83RF-AHZZ01040804.1-igkv |(12121, 12409)|2.15738952655|(0.691,0.727,0.887)|-1
TILTQSAAFVSATPGDKVTISCKASQDIDDDMNWYQLEPGEAPKLIIKDATTLVSGIPPR
FSGSGYGTDFTLTINNVESEDAAYYFCLQHDNFP
>V84RF-AHZZ01040807.1-igkv |(28694, 28982)|1.81434113432|(0.628,0.535,0.812)|-1
TILTQSPAFVSATPGDKVTISCRAGQDIDDDMNWYQQEPGEAPKLIIKDATTLVSGIPPQ
FSGSGYGIDFTLTINSMKSEDTAYYFCQQRDNTP
>V85RF-AHZZ01040807.1-igkv |(39921, 40221)|2.99696400065|(1.000,0.997,1.000)|-1
AKCDIQMTQSPTFLSASVGDRVTIACRASQSIHKGLAWYQQKPGKAPKLLISYASNLYTG
VPSRFSGSGSGTDFTLTISSLQPEDAATYYCFQYNSYP
>V86RF-AHZZ01040808.1-igkv |(17035, 17353)|3.0|(1.000,1.000,1.000)|-1
ACGDIVMTQSPDSLAVSLGERVTINCKSSQSLLYSSNNKNYLAWYQQKPGQTPKLLISWA
STRESGVPNRFSGSGSGTDFTLTISGLQAEDVAVYYCQQHYSTP
>V87RF-AHZZ01042076.1-igkv |(7808, 8108)|2.98632422844|(1.000,1.000,0.987)|-1
TRCAIQMTQSPSSLSASVGDRVTITCRASQSIGSNLAWYQQKPGKVPKLLIYAASTLQSE
VPSRFSGSGSGTDFTLTISSLQPEDVATYYCQKCDSAP
>V88RF-AHZZ01042077.1-igkv |(2202, 2517)|2.95362043638|(1.000,0.960,1.000)|-1
SSGDIVMTQTPLSLPVTLGEPASISCRSSQSLLSSNEYNYLNWYLQKPGQSPQLLIYYGS
NRASGVPDRFSGSGSGTDFTLKISRVEAEDVGVYYCMQALQTP
>V89RF-AHZZ01042078.1-igkv |(13394, 13694)|2.99899200002|(0.999,1.000,1.000)|-1
ARCDIQMTQSPSSLSASVGDRVTITCRASQNIYSNLAWYQQKPGKAPKPLIYYASSLETG
VPSRFRGSGSGTDYTLTISSLQPEDIATYYCQQYNNSP
>V90RF-AHZZ01042078.1-igkv |(35394, 35709)|2.96394425777|(1.000,0.994,0.973)|-1
SSGDVVMTQSPLTLPVTPGQPASISCRSSQSLVHSDGNTYLSWYQQKPGQPPRLLIYKVS
NRYSGVPDRFSGSGAGTDFTLKISRVEAEDVGVYYCMQGTKVP
>V91RF-AHZZ01042078.1-igkv |(45757, 46072)|2.98542016586|(0.999,1.000,0.987)|-1
SSGDIVMTQTPLSLPVTPGEPASISCRSSQSLLHSDGYTYLDWYLQKPGQSPQLLIYGGS
NRASGVPDRFSGSGSGTDFTLKISKVEAEDVGVYYCMQHRALP
>V92RF-AHZZ01042079.1-igkv |(5782, 6096)|2.59009576925|(0.976,0.942,0.797)|-1
SSGDVVLTQTPLSLPVTPGEPASISCRSSQSLLHSNGNTYLDWYLQKPGQSPRLLIYKVT
NRESGVPDRFSGSGSGTDFTLKISRVEPEDVGVYYCMQGTKAP
>V93RF-AHZZ01042080.1-igkv |(4422, 4722)|2.99899600001|(1.000,0.999,1.000)|-1
ARCDIQLTQSPSSLSASVGDRVTISCRTSQNIYSNLAWYQQKPGKTPKLLIYAASSLQSG
IPSRFSGSGSGTDFTLTISSLQPEDVATYYCQHGYGTP
>V94RF-AHZZ01042080.1-igkv |(19769, 20084)|2.99494800078|(1.000,0.997,0.998)|-1
SSGDIVMTQTPLSLPVTPGEPASISCRSSQSLLHSNGNTYLYWYLQKPGQPPRLLIYRVS
NRFSGVPDRFSGSGSGTDFTLKISRVEAEDVGVYYCMQALQNP
>V95RF-AHZZ01042080.1-igkv |(24756, 25071)|2.98379201242|(0.994,1.000,0.990)|-1
SSGDIVMTQTPLSLPVTPGEPASISCRSSQSLLHSNGNTYLHWYLQKPGQSPKLLIYGGS
NRASGVPDRFSGSGSGTDFTLKISKVEVEDVGVYYCVQAIAFP
>V96RF-AHZZ01042083.1-igkv |(18979, 19279)|3.0|(1.000,1.000,1.000)|-1
ARCDIHMTQSPSSLSASVGDRVTITCRASQGITDDLAWYQQKPGETPKLLIYEASSLQSG
IPSRFSGSGSGTEFTLTISSLQLNDSATYYCQHYYSYP
>V97RF-AHZZ01042083.1-igkv |(31495, 31813)|2.95219314055|(0.999,0.986,0.971)|-1
SRGDIMMTQTPLSLPITPGEPASISCRSSQSLLDSDDGYTYLDWYLQKPGQSPQPLIYFV
SSWASGVPDRFSGSGSGTDFTLKISRVEAEDVGVYYCMQCIEFI
>V98RF-AHZZ01042084.1-igkv |(28167, 28465)|2.98297652411|(1.000,1.000,0.984)|-1
ARCDIQLTQSPSSLSASVGDRVTITCQASQGISNNLAWYQQKPGKVPKLLIYKASTLQSG
VPSRFSGSGSGTDFTLTISSLQPEDFATYYCQYGYGI
>V99RF-AHZZ01042085.1-igkv |(3468, 3783)|2.99899600001|(1.000,0.999,1.000)|-1
TSGDIVMTQTPLSLPVSPGEPASISCRSSQSLLHSDGYTYLDWYLQKPGQSPQLLIYLVS
NRASGVPDRFSGSGSGTDFTLKISRVEAEDVGVYYCEQGTQLP
>V100RF-AHZZ01042085.1-igkv |(40087, 40402)|2.96189637729|(1.000,0.998,0.968)|-1
TSGDIVMTQTPLSLPVSPGEPASISCRSSQSLLHSGGKTYLYWYLQKPGQSPQLLIREVS
NRASGVPDRFSGSGSGTDFTLKISPVEAEDVGVYYCMQGIQLP
>V101RF-AHZZ01042085.1-igkv |(49587, 49887)|3.0|(1.000,1.000,1.000)|-1
ARCDIQMTQSPSSLSASVGDRVTITCRASQGITNDLAWYQQKPGETPKLLIYEASSLQSG
IPSRFSGSGSGTDFTLTISSLQPEDFATYYCQHYYSTP
>V102RF-AHZZ01042091.1-igkv |(7298, 7613)|3.0|(1.000,1.000,1.000)|-1
TSGDIVMTQTPLSLSVTPGEPASISCRSSQSLLHSNGNTYLHWYLQKPGQSPQLLIYLVS
NRASGVPDRFSGSGSGTDFTLKISRVEAEDVGVYYCMQGIQLP
>V103RF-AHZZ01042093.1-igkv |(2142, 2442)|2.15821207232|(0.936,0.623,0.924)|-1
ARCAIQMTQSPSSPSATVGDRVTTTCRVSQSINNNLAWYQQKPGKTPKLLICEASSLQSG
IPSRFSGSGSGTDFTLTISSLQSEDVATYFCQHGYSYP
>V104RF-AHZZ01042093.1-igkv |(34873, 35173)|2.99696400065|(1.000,0.997,1.000)|-1
ARCDIQMTQSPSSLSASVGDRVTITCRASQGINKELDWYQQKPGKAPTLLIYAASSLQTG
VSSRFSGSGSGTDFTLTISSLQPEDVATYYCQQDYTTP
>V105RF-AHZZ01042093.1-igkv |(53999, 54314)|2.96015937872|(0.998,0.999,0.967)|-1
SSGDIVMTQTPLSLPVTPGEPASISCRSSQSLLHSNGYTYLYWYLQKPGQSPQLLMYFAS
YRASGVPDRFSGSGSGTDFTLEISRVEAEDIGVYYCMQGTQLP
>V106RF-AHZZ01042093.1-igkv |(71557, 71872)|2.95823309455|(0.996,0.987,0.977)|-1
YSGDIVMTQTPLSLPVIPGEPASISCRSSQSLLDSDGYTCLDWYLQKPGQSPQLLIYEVS
NRASGVPDRFSGSGSVTDFTLKISRVEAEDVGVYYCMQSIEFP
>V107RF-AHZZ01042093.1-igkv |(93881, 94199)|1.97411282508|(0.807,0.896,0.544)|-1
SSGDIVMTQTPLSLLVTPGEPASVSSCRCSQSLPYRGEKTYLYWSLQKPGQSPQLLIYFV
SNRASRVPDRFSGSGSDTDFTLKISWVETEDVGIYYRMENIELP
>V108RF-AHZZ01042093.1-igkv |(102084, 102402)|2.99798400013|(1.000,1.000,0.998)|-1
SSGDIVMTQTPLSLPVTPGEPASISCRSSQSLLDSDDGNTYLDWYLQKPGQSPQLLIYEV
SNRASGVPDRFSGSGSDTDFTLKISRVEAEDVGVYYCMQSTEYP
>V109RF-AHZZ01042093.1-igkv |(120004, 120320)|2.90963747374|(0.983,0.981,0.950)|-1
TSGDILLTQTPLSLPVTPGEPASISCRSSQSLLHSNENTYLHWYLQKPGQSPQLLICEVS
NRASGVPDRFSGSGSDTDFTLKINLVEAEDVGVYYCMQTTQWP
>V110RF-AHZZ01042093.1-igkv |(124902, 125217)|2.99192000218|(0.998,1.000,0.994)|-1
SSGDIVMTQTPLSLPVTLGEPTSISCRSSQSLVYSDGKTYLHWYLQKPGQSPQLLMYLVS
NRASGVPDRFSGSGSGTDFTLKISRVEAEDVGVYYCMQTLRSP
>V111RF-AHZZ01042093.1-igkv |(128335, 128650)|2.73389193832|(0.925,0.976,0.860)|-1
SSGDIVMTQTPLSLPVIPGEPASISCRSSQSLLHSDGYTYLHWYLQKPGQSPQLLIYLGS
NCASVVPDRFSGSGSGTDFTLKISRVEAEDIGIYYRMQNLQIP
>V112RF-AHZZ01042093.1-igkv |(133001, 133301)|2.99593600205|(1.000,0.996,1.000)|-1
ARCDTQMTQSLSSLFASVGDRVTITCRASQGINNELAWYQQKPGKAPTLLLYSGSSLHTG
VPSQFSGSGSGTDFTLTISSLQPEDVATYYCRQDYTTP
>V113RF-AHZZ01042093.1-igkv |(141218, 141533)|2.96559865717|(0.999,0.975,0.994)|-1
SSGDIVMTQTPLSLPVTPGEPSSISCRSSQSLLDSYGYTNLNWYLQKPGQSPQLLIYEVS
NRASGVPDRFSGSGSGTDFTLKISKVEAEDVGVYYCMQTPQTP
>V114RF-AHZZ01042093.1-igkv |(150847, 151147)|3.0|(1.000,1.000,1.000)|-1
ARCDIQMTQSPSSLSASVGDRVTITCQASQGISNNLNWYQQKPGKTPKLLIYAASSLQSG
IPSRFSGSGSGTDFTLTISSLQPEDFATYYCQQRYSAP
>V115RF-AHZZ01042093.1-igkv |(165765, 166067)|2.98771202074|(1.000,0.994,0.994)|-1
TSGDIVMTQTPLSLPVSPGEPASISCRSSQSLLHSNGNTYLHWYLQKPGQSPQLLIYEVS
NWASGVPDRFSGSGSGTDFTLKISRVEAEDVGVYYCEQG
>V116RF-AHZZ01042093.1-igkv |(173599, 173899)|2.99699200002|(0.999,1.000,0.998)|-1
ARCDIQMTQSPSALSASVGDRVTISCRASQNIYSGLAWYQQKPGKAPKLLIYDASGLQSG
IPSQFSGSGSGTDFTLTISSLQPEDSATYYCQHYYDTP
>V117RF-AHZZ01042094.1-igkv |(1120, 1438)|2.97488623715|(1.000,0.977,1.000)|-1
TSGDIVMTQTPLSLPVTPGEPASISCRSSQSLFNSDYANTYLDWYLQKPGQSPQLLIYML
SNRASGVPDRFSGSGSGTDFTLKISRVEAEDVGVYYCMQSIEYP
>V118RF-AHZZ01044061.1-trav |(5488, 5785)|2.90890959463|(0.970,0.945,1.000)|-1
GLRAQLVTQPEDQVTVAERNPLTVKCTYSVSGNPYLFWYVQYPNQGLQFLLKYITGDNLV
KGSYGFEAEFNKSQTSFHLKKPSALVSDSALYFCAVR
>V119RF-AHZZ01044067.1-trav |(5751, 6054)|1.72431176372|(0.805,0.663,0.555)|-1
MCLVLVTTGQNIDQPTEMTAMEGAIVQINCTYQTSGFNGLSWYQQHDGEAPTLLSYNVLD
GLEEKGRFSSFLSNSKRYSYLLLKELQVKDSASYLCAVR
>V120RF-AHZZ01044070.1-trav |(1428, 1737)|1.81631001206|(0.839,0.714,0.572)|-1
TIMYLAIGTAGQSLEQPSEVTAVEGAIVQINCTYQTSRFDGLSWYQQRDGGAPTFLSYNA
LDGLEERGHFSSFLSRSDSYGYLLLQELQMKDSASYFCAVR
>V121RF-AHZZ01067647.1-trbv |(19172, 19469)|2.95535067488|(0.997,1.000,0.963)|-1
PLEAQVTQNPRYLITVTGKKLTVTCSQNMNHDYMSWYRQDPGLGLRQIYYSSNVELVDKG
DIPEGYNVSRKEKRNFPLILESPSPSQTSLYFCASSL
>V122RF-AHZZ01067647.1-trbv |(24494, 24801)|2.99899600001|(1.000,1.000,0.999)|-1
LVDVKVTQSSRYLIKRTGEKVFLECVQDMDHERMFWYRQDPGLGLRLIYFSYDVKVNEKG
DIPEGYSVSREKKERFSLILGSASTNQTSMYLCASSLSTA
>V123RF-AHZZ01067647.1-trbv |(37999, 38302)|2.80182732495|(0.957,0.891,0.972)|-1
SVFSAVVSQKPSRDVCQRGTSVTIQCQVDSQLTMMFWYRQQPGLSMTLIATANQGSEATY
ESGFVIDKFPISRPNLTFSTLTVSNTNPEDSSIYLCSVE
>V124RF-AHZZ01067648.1-trbv |(3732, 4029)|2.99496000066|(0.999,1.000,0.996)|-1
LMEADIYQNPRHRVIGTGKKITLECSQTMGHDKMYWYQQDPGMELHLIHYSYGVNSTERG
DFSSESTVSRIRIEHFPLTLESTSPSHTSQYLCASSE
>V125RF-AHZZ01067649.1-trbv |(1785, 2085)|2.99698000014|(0.998,0.999,1.000)|-1
HAEAGVSQDPRHKITKTGQNVSFKCVPISEHNRLYWYRQTLGQGPEFLTYFQNEAQQDRS
GLFSDRFSAERPEGSISTLMIQHTEQGDSAVYLCASSL
>V126RF-AHZZ01067649.1-trbv |(16676, 16973)|2.99899600001|(1.000,1.000,0.999)|-1
HMDAGITQSPRHKITETGTPVTLRCHQTENHRYMYWYRQDLGNGLRLIHYSYGVEDTDKV
EISDGYSVSRSKTEDFLLTLESATRSQTSVYFCASSE
>V127RF-AHZZ01067649.1-trbv |(28030, 28318)|2.21044742208|(0.949,0.643,0.932)|-1
GVTQSPRYKITEKKQPVAFWCNPISGHNTLYWYRQNLGQGPELLIRYENEEAVDDSRFPK
DRFSAERLKGVDSTLKIQPAELGDSAVYLCASSL
>V128RF-AHZZ01067649.1-trbv |(33773, 34073)|2.82562565204|(0.952,0.923,0.954)|-1
HTDAGVIQSPRHEVTEMGKEVTLRCEPISGHSSLFWYRQSMMRGLEFLIYFNNKSPIDDS
GMPKDRFSATMPNASFSTLKIQPSEPRDSAMYFCASSL
>V129RF-AHZZ01067649.1-trbv |(37056, 37356)|2.9409000027|(0.980,0.977,0.984)|-1
HTDAGVIQSPRHEVTEMGKEVTLRCEPISGHTYLFWYRQSMMQGLEFLIYFNDKSPIDDS
GMPKDRFSATMPNASFSTLKIQPSEPRDSAVYFCASSL
>V130RF-AHZZ01067649.1-trbv |(52456, 52756)|2.99196000066|(0.996,0.999,0.997)|-1
LIDAGVTQTPRHKVTEMGQEVTMRCQPILGHNTVFWYRQTVMQGLELLVYLRNKASLDDS
GMPKDRFSAEMPDASLATLKIQPSEPRDSAVYLCASGL
>V131RF-AHZZ01067649.1-trbv |(59401, 59701)|2.98066002957|(0.994,1.000,0.987)|-1
HTEAGVTQFPSHRVIEKGQTVTLRCDPISGHDYLYWYRRVMGKEIKFLIYFMRASVQDES
GMPNKRFSAERTGGTYSTLKVQPAELEDSGVYFCASSQ
>V132RF-AHZZ01067649.1-trbv |(64509, 64806)|1.62356777694|(0.919,0.579,0.688)|-1
HGDVMVIQNPRYQVTQLEKPVTLSCSQNLNHKVMYWYQQKPSQAPKLLFHYYDKDFNNEA
DTPDNFQSRRPNTSFCFLDIRSPGLEDAAVYLCASSK
>V133RF-AHZZ01067649.1-trbv |(69483, 69783)|2.9878720041|(0.996,1.000,0.992)|-1
SPGEEVTQTPKHLVKGEGQKAKLYCDPIKGHSYVFWYQQVLRKEFKFLISFQNKNVFDET
GMPKERFSAKCPANSPCSLEIQATKLKDSAVYFCASSQ
>V134RF-AHZZ01067649.1-trbv |(89894, 90191)|2.98558408012|(0.998,1.000,0.988)|-1
TVDGGITQSPKYLFRKEGQNVTLSCEQNLNHDAMYWYRQDPGQGLRLIYYSQIVNDIQNG
DIAEGYSVSRDRKESFPLTVTSAQRNPTAFYLCASSI
>V135RF-AHZZ01067649.1-trbv |(108243, 108543)|2.94947496801|(0.996,0.959,1.000)|-1
SADTKVTQRPRLLVKANEQKAKMDCVPVKGHSYVYWYRKKLDEELKFLVYFQNEEIIQKA
EIINERFSAQCPQNSPCTLEIQSTESGDAALYFCASSK
>V136RF-AHZZ01067649.1-trbv |(117153, 117458)|2.88974188868|(0.996,0.959,0.949)|-1
SFHAEVTQTPGYLVKGKGQKTKIDCTPEKGHTYVYWYQQNQNKEFTFLISFQDEQVLQET
ELHKKRFSSQCPKNLPCSLEIPSSEPGDTALYLCASSQST
>V137RF-AHZZ01067649.1-trbv |(129327, 129625)|2.96874003277|(0.992,0.993,0.984)|-1
SMDADVTQTPRNSIAKTGKRIMLECSQTKGHDQMYWYRQDPGLGLRLIFYSFDVEDINKG
EISDGYSASRQEQAKFSLSLESATPNQTALYFCATSD
>V138RF-AHZZ01067651.1-trbv |(1632, 1932)|2.99899600001|(1.000,0.999,1.000)|-1
HTGAGVSQSPRYKVTKRGQDVALRCDPISGHDYLYWYQQALGQGPELLTYFNYEAQQDKS
GLPNDRFSADRPEGSVSTLKIQRTEQRDSAVYLCASSL
>V139RF-AHZZ01067651.1-trbv |(6692, 6982)|2.98768003481|(1.000,0.996,0.992)|-1
DAGVTQSPTHLIKMRGQQVTLRCSPISGHTSVSWYQQALGQGPQLIFEYDRKEERVRGNF
LDRFSGRQFPNYSSELNVNASEMGDSALYLCASSL
>V140RF-AHZZ01067651.1-trbv |(13303, 13600)|3.0|(1.000,1.000,1.000)|-1
PGNAGVTQTPKFQILKTGQSMTLQCAQDMNHNYMSWYRQDPGVGLRLIHYSVGAGVTDKG
EVSNGYNVSRLNTEDFPLSLESAASSQTSVYFCASSY
>V141RF-AHZZ01067651.1-trbv |(19186, 19486)|2.0143193612|(0.947,0.549,0.998)|-1
HTGAGVSQFPRYRVTKRGQDVTLRCDPISGHEYLSWYQQAPGQGPEFLTYFQNDAQLDKS
GLPSDRFSAARPEGSVSTLKIQRTEQGDSAVYLCASSL
>V142RF-AHZZ01067651.1-trbv |(27974, 28285)|2.84253608204|(0.943,0.947,0.953)|-1
PVEPGVTQSPTHLIKTRGQQVILRCSPISGHSSVYWYQQALGQGPQFIFEYCQKEERGRG
NFPDRFSGRQFPNYSSELNVSALLLGDSALYLCASSLAQPAE
>V143RF-AHZZ01067651.1-trbv |(47891, 48187)|3.0|(1.000,1.000,1.000)|-1
PVDAGVTQSPTHLIKTRGQQVTLRCSPISGHTSVYWYQQALGQGPQFIFQYYEKEERERG
NFPDRFSGRQFPNYSSELNVSALLLGDSALYLCASSL
>V144RF-AHZZ01067651.1-trbv |(55192, 55483)|2.99389600501|(1.000,0.999,0.995)|-1
NADVTQTPKFRVLKTGQSMIVQCAQDMKHDYMFWYRQDPGMGLRLIYYSVTAGITTKGEV
PNGYNVSRINTEDFLLRLESAALSQTSVYFCASSY
>V145RF-AHZZ01067651.1-trbv |(59487, 59787)|3.0|(1.000,1.000,1.000)|-1
HTGAGVSQSPRYKVIKKGQDVALRCDPISGHAALYWYQQALGQGPEFLTYFNYQAQPDKS
GLPNDRFSAERSEGSVSTLTIQRTEQQDSAVYLCASSL
>V146RF-AHZZ01067651.1-trbv |(68255, 68551)|2.78653347192|(0.978,0.970,0.878)|-1
PVIAGVAQSPTHLIKTRGQQVTLRCSPISGHNTVYWYQQALGQGPQLIFQYYRGEDRGRG
NFPERFSGHQFPNYSSELNVSALLLGDSALYLCASSL
>V147RF-AHZZ01067652.1-trbv |(695, 992)|3.0|(1.000,1.000,1.000)|-1
PVNAGVTQTPKFQVLKTGQSMTLQCAQDMNHDCMYWYRQDPGMGLRLIHYSVGEGSTDKG
EVPDGYNVTRSNTEDFPLRLESAAPSQTSVYFCASSY
>V148RF-AHZZ01067652.1-trbv |(5225, 5525)|2.99798400013|(1.000,0.998,1.000)|-1
HTGAGVSQSPRYKVTKRGQDVALRCDPISGHDYLYWYQQAPGQGPEFLTYFQNDAQRDKS
GLPNDRFSAERTEGSVSTLKIQRTEQADSAVYLCASSL
>V149RF-AHZZ01067652.1-trbv |(13142, 13432)|2.82846247636|(0.979,0.979,0.897)|-1
DAGVTQSPTHLIKTRGQQVTLRCSPISGHTSVSWYQQALGQGLQFILWYDEEEERGRGTF
PHRFSGHQFPNYSSELNVNASEVGDSALYLCASSL
>V150RF-AHZZ01067652.1-trbv |(18426, 18743)|2.56643762103|(0.881,0.947,0.789)|-1
LVNAGVTQTPKFQVLKTGQSMTLQCAQDMSHNWYRQHPGMGLRLIRYSAAADVTDKGEVP
SGYNVSRLNTEDFPLRLESAASSQTSVYFCASSYSPTLQGHLLS
>V151RF-AHZZ01067652.1-trbv |(24517, 24817)|3.0|(1.000,1.000,1.000)|-1
HTGAGVSQSPRYKVTKRGQDVALRCDPISGHVALYWYQQALGQGPEFLTYFQNDAQPDKS
GLPSDRFSAERPEGSVSTLKIQRTQQGDAAVYLCASSL
>V152RF-AHZZ01067652.1-trbv |(35002, 35298)|2.99289600501|(0.999,0.994,1.000)|-1
SVDGGVTQSPRHLIKTTGQQVTLRCSPISGHTSVSWYQQALGQGPQFIFEYYEEKERERG
NFPDRFSGHQFPNYSSELNVNALEAGDSALYLCASSL
>V153RF-AHZZ01067652.1-trbv |(38310, 38607)|2.99385601037|(1.000,1.000,0.994)|-1
LVNAGVTQTPKFQVLKTGQSMTVQCAQDMNYNFMYWYRQDPGVGLRLIHYSGAAGTTDKG
EVPSGYNVSRLNTEIFPLRLESAAPSQTSVYICASSY
>V154RF-AHZZ01067652.1-trbv |(42887, 43187)|2.98296000066|(0.995,0.996,0.992)|-1
HTGARVSQSPRYKVTKRGQDVALRCDPISGHDYLYWYQQALGQGPELLTYFSYEAQQDKS
GLPSDRFSAERPEGSVSTLKIQRTQQWDSAMYLCASSL
>V155RF-AHZZ01067652.1-trbv |(53188, 53484)|2.66350187508|(0.995,0.906,0.862)|-1
SVDAGVTQSPTHLIRKRGQQVTLRCSPISGHNTVSWYQQALGQGPQFIFQYYEKEERGRG
NFPDRFSGHQFPNYSSELNVNASEMGDSALYLCASSL
>V156RF-AHZZ01067653.1-trbv |(5340, 5640)|2.99088400513|(0.998,1.000,0.993)|-1
HTGAGVSQSPSNKVTEKGKDVVLRCDPISGHAVLYWYRQNLGQGLEFLIYFQGKGAVDDS
GLCSDRFSATRPEGSASTLKIQHTEQGDSAMYFCASSL
>V157RF-AHZZ01067653.1-trbv |(10391, 10687)|2.97553608204|(0.994,0.984,0.998)|-1
SVDTGVTQSPTHLIKTRGQQVTLRCSPISGHNTVSWYQQTPGQGPQFIFEYANELRTSEG
NFPHRFSGRQFRDYHSEMNVSALELGDSALYLCASSL
>V158RF-AHZZ01067653.1-trbv |(13070, 13360)|2.99385601037|(1.000,0.994,1.000)|-1
DCGVTQTPKHLITAIGQQVTLRCSPRSGDLSVYWYQQSLGQGLQFLIQYYNGEERAKGNI
LERFSAQQFPDLHSELNLSSLELGDSALYFCASSL
>V159RF-AHZZ01067653.1-trbv |(21072, 21369)|2.19741045938|(0.898,0.623,0.947)|-1
HRDAEITQSPRHKITETGRKVTLTCHQTWNHNNMFWYQQDLGHGLRLIHYSYGVPDTNKG
EVPDGYSVSRSKTEDFPLTLESAASSQTSVYFCASSE
>V160RF-AHZZ01067653.1-trbv |(30671, 30959)|2.31790777101|(0.954,0.820,0.757)|-1
GVAQSPRYKITEKSQAVAFWCDPISGHATLYWYRQILGQGPELLVRFQNKGVVDDSQLPK
DRFSAERLKGVDSTLRIQPAELGDSAVYLCASSL
>V161RF-AHZZ01067653.1-trbv |(43250, 43547)|2.85217355131|(0.985,0.899,0.998)|-1
HRDAEITQSPRHKVTETGRQVTLTCHQTWNHNNMFWYRQDLGHGLRLIYYSAGASIIDKG
EVPDGYVVSRSKTEDFPLTLESATRSQTSVYFCASSE
>V162RF-AHZZ01067653.1-trbv |(52371, 52659)|2.45277534984|(0.930,0.902,0.748)|-1
GVAQSPRYKVIEKSQAVTFWCNPVSGHATLYWYRQILGQGPELLVQFRNNDVVDDSQLPK
DRFSAERLKGVNSTLKIQPAELGDSAVYLCASSL
>V163RF-AHZZ01067655.1-trbv |(10936, 11249)|2.99174403277|(1.000,1.000,0.992)|-1
SLDTAVSQTPKYLVTQTGKNESLKCEQNLGHNAMYWYKQDSKKLLKIMFIYNNKEPILNE
TVPNRFSPKSPDKAHLNLHIKSVELGDSAVYFCASSQDTALQ
>V164RF-AHZZ01067655.1-trbv |(14360, 14657)|2.91229270938|(0.975,0.998,0.945)|-1
PMDTGVTQTPRHLVMGMTNKKSLKCEQHLGHNAMYWYKQKAKKPPELMFIYNFKEPAENN
SVPSRFVPECPDSSLFYLHLRALQPEDSALYLCASSQ
>V165RF-AHZZ01067655.1-trbv |(26234, 26531)|3.0|(1.000,1.000,1.000)|-1
LVNAGVTQTPKFQVLKTGQNMTLKCAQDMNHDRMYWYRQDPGMGLRLIHYSAGEGSTEKG
EVSNGYNASRLNKKDFLLRLESAAPSQTSMYFCASSE
>V166RF-AHZZ01067655.1-trbv |(28925, 29222)|3.0|(1.000,1.000,1.000)|-1
PVNAGVTQTPKFQILKTGQNMTLKCAQDMNHNYMYWYRQDPGMGLRLIHYSAGEGSTEKG
EVPDGYNASRLNPQNFLLRLESAAPSQTSMYFCASSE
>V167RF-AHZZ01067655.1-trbv |(32665, 32965)|2.99899600001|(1.000,0.999,1.000)|-1
HTGAGVSQSPRNKVTEEGKDVVLRCDPISGHTALYWYRQSLGKGLEFLIYFQGNDAPDKS
GLPSGRFSAERTEGSVSTLKIQRTEQGDSAVYLCASSL
>V168RF-AHZZ01067656.1-trbv |(7788, 8088)|1.93010235129|(0.974,0.991,0.523)|-1
HTEPEVTQTPSHQVTQMGQEVILRCVPISNHFYFYWYRQILGQKVEFLVSFVNDEISDKS
EMFDDRFSVGRSDGSNFTLKIKSTKLEDSAMYFCASSE
>V169RF-AHZZ01067656.1-trbv |(14292, 14589)|3.0|(1.000,1.000,1.000)|-1
PLDTAVFQTPKYLVTQTGKKESLKCEQNLGHDTMYWYKQDSKKLLKIMFIYSNKEPILNE
TVPNRFSPDSPDKAHLNLHIKSVELGDSAVYFCASSQ
>V170RF-AHZZ01067656.1-trbv |(18626, 18923)|3.0|(1.000,1.000,1.000)|-1
PTDTGVTQTPKHLVMGMTNKKSLKCEQHLGHNAMYWYKQKAKKPPELMFIYNYEKLSINE
SVPSRFSPECSKSSLLYLHLRALQPEDSALYLCASSQ
>V171RF-AHZZ01067656.1-trbv |(37172, 37469)|3.0|(1.000,1.000,1.000)|-1
PANADVTQSPKFQILKTGQSMTLQCAQDMNHNSMYWYRQDPGMGLRLIHYSATKDTTDPG
EVPDGYSVSRLNKKEFLLKLESAAPSQTSVYFCASSE
>V172RF-AHZZ01067659.1-trbv |(1934, 2234)|2.53437564642|(0.981,0.991,0.752)|-1
HTEPEVTQTPSHQVTQMGQEVILRCVPISNHLYFYWYRQILGQKVEFLVSFYNGKISEQS
EIFDDRFSVGRSDGVHFTLKIKSTKLEDSAMYFCASSE
>V173RF-AHZZ01069458.1-ighv |(21609, 21918)|2.99699200002|(0.999,1.000,0.998)|-1
VQCEVQLVESGGGLVQPGASLRLSCEASGFTFGDYAMSWVHQAPGKGLEWVSSISYTGKN
IYYADSVKGRFTISRDNAKNSLSLQMNSLKTEDTAVYYCTR
>V174RF-AHZZ01069458.1-ighv |(26822, 27131)|3.0|(1.000,1.000,1.000)|-1
VQCEVQLVESGGGLVQPGGSLRLSCAASGFTFSSYDMSWVRQAPGKGLEWVSYISNGGGS
TYYADSVKGRFTISRDNSKNTLSLQMNSLRAEDTAVYYCAK
>V175RF-AHZZ01069461.1-ighv |(27499, 27811)|2.99899200002|(0.999,1.000,1.000)|-1
VLSQVQLQESGPGLVKPPETLSLTCAVSGGSISDSYYWSWIRQPPGKGLEWIGYIYGGSG
STSYNPSLKSRVTLSVDTSKNQFSLKLSSVTAADTAVYYCAR
>V176RF-AHZZ01084887.1-ighv |(16319, 16625)|2.99067605248|(1.000,1.000,0.991)|-1
CAEVQLVQSGAEVKRPGESLRISCKTSGYSFTSYWISWVRQMPGKGLEWMGMIDPSDSDT
RYSPSFQGQVTISADKSISTAYLQWSSLKASDTATYYCAR
>V177RF-AHZZ01084890.1-ighv |(9388, 9701)|2.99899600001|(1.000,1.000,0.999)|-1
VQCEVQLVESGGGLVQPGGSLRLSCAASGFTFSNSWMNWVRQAPGKGLEWVARIKSKADG
ETADYAASVKGRFTISRDDSKNTLYLQMNSLKTEDTAVYYCT
>V178RF-AHZZ01084890.1-ighv |(28760, 29069)|2.96063747374|(1.000,0.967,0.998)|-1
VQGEVQLVESGGGLAKPGGSLRLSCAASGFTFSNYWMYWVRQAPGKGLEWVSAINTGGGS
TYYADSVKGRFTISRENAKNTLYLQMNSLRAEDTAVYYCAK
>V179RF-AHZZ01084892.1-ighv |(6822, 7131)|2.4768190316|(0.989,0.988,0.732)|-1
VQCEVKLVESGGGLVQPGGSLRLSCAISGFTFSNYWMFWVRQAPGKGLEWVSSISGSSSS
TYYPDSVKGRFTISRDNAKNTLYLQMNSPRAEDTAVYYCAR
>V180RF-AHZZ01084892.1-ighv |(16134, 16440)|2.96974467291|(0.983,0.988,1.000)|-1
VQCEVQLVAYGGGLQQPGGSLRLSCGFTFSDHYMSWIRQAPGKGPEWVGFMRNKANGGTT
EYATSVKGRFTISRADSKSMASLQMSSLNTEDTAVYYCAR
>V181RF-AHZZ01084892.1-ighv |(32791, 33100)|2.99696400065|(1.000,1.000,0.997)|-1
VQCEVQLVESGGGLVQPGGSLRLSCAASGFTFSDYWMDWVRQAPGKGLEWVSSVSGSSSN
TYYPDSVKGRFTISRENAKNTLYLQMNSLRAEDTAVYYCAR
>V182RF-AHZZ01084893.1-ighv |(12328, 12643)|3.0|(1.000,1.000,1.000)|-1
VQCEVQLVESGGGLVQPGRSLRLSCAASGFTFSNYYMDWVRQAPGKGLEWVGRIRNKANS
YTTEYAASVKGRFTISRDDSKNTLYLQMSSLKTEDTAVYYCAR
>V183RF-AHZZ01084896.1-ighv |(1010, 1319)|2.96328365264|(0.998,0.996,0.972)|-1
VCAEVQLVQSGAEVKRPGESLRISCKTSGYSFTGSWISWVRQMPGKGLEWMGSIYPGDSD
TRYNPSFQGQVTISADKSISTAYLQWSSLKASDTATYYCAK
>V184RF-AHZZ01089506.1-iglv |(19553, 19862)|2.8448212941|(0.993,0.892,1.000)|-1
SWAQSVLTQPPSASEAPGQRVTISCSGSSSNIGSNYVNWYQQLEGKAPKLLIYNNNQRPS
GVPDRFSGSKSGTSASLTISGLQSEDEADYYCAAWDNSLNG
>V185RF-AHZZ01089506.1-iglv |(37855, 38165)|2.98106440553|(1.000,0.985,0.997)|-1
SLSQPVLTQPASLSASPGASARLTCTLSSGINVGSYRIYWYQQKPGSPPRYLLNYYSDSD
KDQGSGVPSRFSGSKDASANAGLLLISGLQSEDEADYYCAI
>V186RF-AHZZ01089506.1-iglv |(48570, 48877)|2.99598000014|(0.999,1.000,0.997)|-1
SWAQSVLTQPPSVSAAPGQKVTISCSGSSSNIGSKYVSWYQQLPGTAPKLLIYDNNKRPS
GISDRFSGSKSGTSATLAITGLQTGDEADYYCAAWDNSLS
>V187RF-AHZZ01089506.1-iglv |(53590, 53897)|2.99798400013|(1.000,1.000,0.998)|-1
SWAQSVLTQPPSVSGDPGQRVTISCTGSSSNIGGYYVYWYQQLPGTAPKLLIYDNNKRPS
GVSDRFSGSKSGTSASLTITGLQPGDEADYYCGAWDSSLS
>V188RF-AHZZ01089506.1-iglv |(59408, 59715)|2.98542016586|(0.999,1.000,0.987)|-1
SRAQSVLTQPPSVSGAPGQKVTISCTGSSSNIGGYNVYWYQQLPGTAPKLLIYDNNKRPS
GISDRFSGSKSGTSASLAITGLLPEDEADYYCQSYDSSLS
>V189RF-AHZZ01089506.1-iglv |(83472, 83782)|2.9164123118|(1.000,0.987,0.943)|-1
SLSQPVLTQPASLSASPGASASLTCTFSGGINVAGYYIYWYQQKPGSPPRYLLRYKSDSD
KGQGSGVPSRFSGSKDASANTGILRISGLQSEDEADYYCAI
>V190RF-AHZZ01089506.1-iglv |(88028, 88337)|2.99899600001|(1.000,0.999,1.000)|-1
SWAQSVLTQPRSASEAARKSVTISCSGSSSNIGSNSVSWYQQLPGTAPKLLIYYNDQRAS
GVSDRFSGSKSGTSASLAISGLQTEDEADYYCTAWDDSLSG
>V191RF-AHZZ01089507.1-iglv |(5814, 6121)|1.73182735397|(0.807,0.688,0.540)|-1
SNSQAVVTQEPSMTVSPGGTVTLTCASSTGAVTSGNYPNWFQQKPGQAPRTLIYNTNSKY
SWTPARFSGSLAGGKAALTLSGAQPEDEAEYYCLLYYSGA
>V192RF-AHZZ01089507.1-iglv |(10483, 10793)|2.76901868062|(0.999,0.987,0.859)|-1
SLSQPVLTQPASLSASPGASASLTCTFSGGINVAGYYIYWYQQKPGSPPRYLLWYKSDSD
KGQGSGVPSRFSGSKDASANTGILRISRLQSEDEADYYCAI
>V193RF-AHZZ01089507.1-iglv |(15336, 15645)|2.77130331821|(1.000,0.997,0.855)|-1
SWAQSVLTQPPSASGAPGQSVTISCSGSSSNIRGNGVHWYQQLSGTAPKLLIYNNNQRPS
GVPDRFSGSKSGTSASLAITGLRPEDEADYYCEAWDDSLSG
>V194RF-AHZZ01089508.1-iglv |(4484, 4790)|1.52483180769|(0.512,0.900,0.709)|-1
SLSQPVLTQPPSASASLGASVTLTCTLSSGYSNYAVDWHQQRPGKGPQFVMRVGTGGIVG
SKGDGIPDRFSGSGSGLNRYLTIKNTQEEDESDYHCGADH
>V195RF-AHZZ01089508.1-iglv |(11286, 11596)|2.80914918779|(0.999,0.892,0.967)|-1
SLSQPVLTQPTSLSASPGASARLTCTLRSGISVGSYRIFWYQQKPGSPPRYLLWYKSDSD
KHQGSGVPSRFSGSKDASANAGILLISGLQSEDEADYYCTT
>V196RF-AHZZ01089508.1-iglv |(16094, 16403)|3.0|(1.000,1.000,1.000)|-1
SWAQSVLTQPPSASGAPGQRVTISCSGSSSNIGSNNVYWYQQFPGTAPKLLIYYSNQRPS
GVPDRFSGSKSGTSASLAITGLRSEDEADYYCAAWDDSLSS
>V197RF-AHZZ01090491.1-ighv |(1149, 1458)|2.99798400013|(1.000,1.000,0.998)|-1
VQCEVQLVESGGGLVKPGASLRLSCAASGFTFSSYGMHWVRQAPGKGLEWVSSISSDSSY
IYYADSVKGRFTISRDNAKNSLSLQMNSLRAEDTAVYYCAR
>V198RF-AHZZ01090492.1-ighv |(8844, 9153)|2.9803601679|(0.999,0.995,0.987)|-1
AHSQVQLVQSGAEVKKPGSSVKVSCKASGYTFTDYYMHWVRQAPGQGLEWMGEINPKTGG
TNYAQKFQGRVTMTRDTSTSTAYMELSSLRSEDTAVYYCAT
>V199RF-AHZZ01090492.1-ighv |(11745, 12060)|2.99035210496|(0.991,1.000,1.000)|-1
VQCEVQLVESGGGLVQPGGSLRLSCAASGFTFSNHCMSWVRQAPGKGPEWVGLIRNKANG
GRAEYAASVKGRFTISRDDSKSIASLQMNSLKTGDTAVYYCTR
>V200RF-AHZZ01090494.1-ighv |(1969, 2281)|2.99593600205|(1.000,0.996,1.000)|-1
VLSQVKLQESGPGLVKPSETLSLTCTVSSGSISDSYYWSWIRQAPGKGLEWIGRIYSSGS
STNYNPSLKNRVTISTDTSKNQFSLKLSSVTAADTAVYYCAR
>V201RF-AHZZ01090495.1-ighv |(1255, 1564)|2.96526365316|(0.997,1.000,0.971)|-1
AQSQVQLVQSGAEVKKPGASVKLSCKASGFTFISYAISWVRQAPGQGLEWMGEIIPAFGI
ADYAQKFQGRVTITADTSTSTAYMELSSRRSEDTAVYYCAR
>V202RF-AHZZ01093946.1-trav |(12355, 12645)|2.99498000014|(0.998,0.997,1.000)|-1
VSSEDKVMQNPLSLVVHEGDTVTLNCSYEVVNFQSLLWYKQEKKAPTFLFTLTSSGIEKK
SGRLSSILDKKDFFSILNITATQTRDSAVYLCAVE
>V203RF-AHZZ01093949.1-trav |(3892, 4191)|2.99385601037|(1.000,1.000,0.994)|-1
VNGQQIMQIPQYQHVQEGEDFTTYCNSSTTLNNIQWYKQRPGGHPVFLIMLVKSGEVKKQ
KRLTFQFGEAKKNSSLHITATQTTDVGSYFCAGHSAPQ
>V204RF-AHZZ01093949.1-trav |(14852, 15142)|2.66546075075|(0.931,0.813,0.989)|-1
TIIDAKTTQPTSMDCAEGRAANLPCNHSTIGGNEYIHWYRQIHSQGPQYVIHGLKNNETN
AMASLIITEDRKSSTLILPHATLRDTAVYYCIVRV
>V205RF-AHZZ01093949.1-trav |(55719, 56043)|2.05882250733|(0.656,0.901,0.750)|-1
VNSQQKNDDQQVKQNPPSLSVQEGGISILNCDYTNSMFDYFLWYKKYPAEGPTFLISISS
VKDKNEEGRFTVFLNKSAKHLSLHIRASQPGDSAVYLCAARAQCSP
>V206RF-AHZZ01093949.1-trav |(61192, 61479)|2.80128760087|(0.948,0.890,0.981)|-1
VRSQKPVQSPQVVILQEGEDAIINCNSSKALYSVHWYRQKHGEAPVFLMILLKGGEQKSH
DKIVATFNEKKQQSSLYLMASQLSYSRTYFCGAE
>V207RF-AHZZ01093949.1-trav |(89299, 89586)|2.1208509405|(0.672,0.761,0.885)|-1
VSSQELEQSPQSLIVQEGKNLTINCTSSKTLYGLHWYKQKYGEGLIFLIMLQQGGEEKSH
EKITAKLDEKKQQSFLHITASQPSHAGIYLCGGD
>V208RF-AHZZ01093953.1-trav |(7506, 7806)|2.97198400013|(0.990,0.992,0.990)|-1
SSVAQKVTQAQSSVSMPVGKAVTLNCQYETSSWSYDLFWYKQPPSKEMIFLIRQGYSEQN
ARNGRYSVNFQKAASSIALTISALQLEDSATYFCALRE
>V209RF-AHZZ01096568.1-ighv |(3158, 3467)|3.0|(1.000,1.000,1.000)|-1
VLSQVQLQESGPGLVKPSETLSLTCAVSGGSISSSYWNWIRQAPGKGLEWIGRIYSSGSS
TNYNPSLKNRVTISTDTSKNQFSLKLSSVTAADTAVYYCAR
>V210RF-AHZZ01096568.1-ighv |(16270, 16579)|3.0|(1.000,1.000,1.000)|-1
VQGEVQLVESGGGLAKPGGSLRLSCAASGFTFSSYGMSWVRQAPGKGLEWVSAISSGGGS
TYYADSVKGRFTISRDNSKNTLSLQMNSLRAEDTAVYYCAK
>V211RF-AHZZ01096572.1-ighv |(422, 737)|2.997|(0.999,0.999,0.999)|-1
VQCEVQLVESGRGLVQPGGSLRLSCAVSGFTFSDHYMSWVRQAPGKGPEWVGFMRNKANG
GRTEYAASVKGRFTISRDDSKSTPSLQMSSLNTEDTAVYYCAR
>V212RF-AHZZ01096574.1-ighv |(7206, 7516)|2.99798400013|(1.000,1.000,0.998)|-1
VQCEVQLVESGGGLAQPGGSLRLSCVASGFTFSDHYMDWVRQAPGKGLEWVSSISTGSGS
TTLYPDSVKGRFTISRDNAKNTVYLQMNSLRAEDTAVYYCA
>V213RF-AHZZ01096575.1-ighv |(832, 1141)|2.99294800078|(0.998,1.000,0.995)|-1
AHSEVQLVQSGAEVRKPGATVKISCKASGYTFTDYYLSWVRQAPGKGLEWMGCVDPEDGE
AIYAQKFQGRVTITADTSTDTAYMELSSLRSEDTAVYYCAR
>V214RF-AHZZ01103093.1-ighv |(4113, 4425)|2.95973242436|(0.988,0.974,0.999)|-1
VLSQVQLQESGPGLLKPSETLSLTCAISGGSISSSYHYWSWIRQAPGKGLEWIGYISYSG
STNYNPSLKSRVTISTDTSKNQFSLKLSSVTAADTAVYYCAR
>V215RF-AHZZ01103093.1-ighv |(19002, 19311)|2.98097252412|(0.999,1.000,0.983)|-1
VLSQVQLQESGPGLVKPSETLSLTCAVSGYSISSGYYWGWIRQPPGKGLEWIGSIYSSGS
NYLNPSLKSRVTLSVDTSKNQFSLKLSSVTAADTAVYYCAR
>V216RF-AHZZ01103094.1-ighv |(666, 977)|2.99899600001|(1.000,1.000,0.999)|-1
VQCEVQLVESGGGVVQPGGSLRLSCAASGFTFDDYAMGWVRQAPGKGLEWVSAISWSGGS
TGYADSVKGRFTISRDNAKNSLYLQMNRLRAEDTALYYCAKD
>V217RF-AHZZ01103096.1-ighv |(14463, 14777)|2.01508980683|(0.980,0.559,0.984)|-1
VLSQVTLKESGPALVKPTQTLTLTCTLSGFSISTSGTGVGWIRQPPGKALEWLASIYWND
SKYYSTSLKSRLTISKDTSKNQVVLTMTSMDPVDTATYYCARV
>V218RF-AHZZ01103097.1-ighv |(667, 978)|2.99899600001|(1.000,1.000,0.999)|-1
VQCDVQLVESGGGLVKPGGSLRLSCVASGFTFSSYEMHWVRQAPGKGLEWVSGISTSGGT
TYYADSVKGRFTISRDNAKNSLFLQMNSLRAEDTAVYYCAKE
>V219RF-AHZZ01103097.1-ighv |(4629, 4936)|2.96552457073|(0.998,0.986,0.983)|-1
VLSQVQLQESGPGVVKPSETLSLTCAVSGYSISSGYYWGWIRQPPGKGLEWIGSIYSSGS
NYLNPSLKSRVTLSVDTSKNQFSLKLSSVTAADTAVYYCA
>V220RF-AHZZ01103258.1-ighv |(1265, 1574)|2.99596800026|(1.000,0.998,0.998)|-1
VLSQVQLQESGPGLVKPSETLSLTCAVSGGSISSNYWNWIRQAPGKGLEWIGSIYSSGSS
TNYNPSLKNRVTISTDTSKNQFSLKLSSVTAADTAVYYCAR
>V221RF-AHZZ01104243.1-igkv |(7682, 7981)|2.99798400013|(1.000,0.998,1.000)|-1
TTGEIVLTQSPATLSLSPGERATLSCRASQSVSSSLAWYQQKSGQAPRLLIYGASSRATG
IPDRFSGSGSGTDFTLTISILEPEDVAVYYCQQYYNWN
>V222RF-AHZZ01105198.1-iglv |(1704, 2007)|2.99899600001|(1.000,0.999,1.000)|-1
SWAQSALTQPRSVSGSPGQSVTISCTGTSSDIGGYNYVSWYQQHPGKAPKLMIYDVSKRP
SGVSDRFSGSKSGNTASLTISGLQAEDEADYYCSSYAGS
>V223RF-AHZZ01105198.1-iglv |(11242, 11543)|2.30108188363|(0.968,0.679,0.941)|-1
TLSVSVSPGQTARITCSGDVLKENYADWYQQKPGQAPVLVIYEDSKRPSGIPERFSGSTS
GDTTTLTISSTLSEDEADYYCFSGNENNPIVTQADGEV
>V224RF-AHZZ01105199.1-iglv |(5057, 5367)|2.99096400065|(0.996,0.996,0.999)|-1
SWAQAALTQPPSVSKSLGQSVTISCTGTSNDIGGYNAVSWYQQHPGTAPRLLIYEVSNRP
SGVSDRFSGSKSGNTASLTISGLQAEDEADYYCGSYRSGST
>V225RF-AHZZ01105199.1-iglv |(17460, 17763)|3.0|(1.000,1.000,1.000)|-1
SAASYELTQPHSVSVSPGQTARITCGGDNIGSKYVQWYQQKPAQAPVLVIYADSERPSGI
PERFSGSKSGNTATLTISGVEAGDEADYYCQVWDSSSDH
>V226RF-AHZZ01105200.1-iglv |(22027, 22330)|2.99174403277|(1.000,0.992,1.000)|-1
SAASYELTQPGSVSVSPRQTARITCGGDNIGSKSVHWYQQKPGQAPVLVIYNDSERPSGI
PERFSGSNSGNTATLTISGVEAGDEADYYCQVWDSSSKY
>V227RF-AHZZ01105200.1-igkv |(26500, 26805)|1.75565540287|(0.677,0.586,0.570)|-1
SVVSSELTQSCMSVPGTYSQDDCQGDSLKTYYASWYQQKQARSLCWSSMVTTTGPQGSPG
RFSVSWSGNTGSLTITAAQVEDEADYYCNSWDSSGNHPTV
>V228RF-AHZZ01105201.1-iglv |(54273, 54570)|2.98996000066|(0.998,0.995,0.997)|-1
SVASYELTQPPSVSVSPGQTARITCSGDALPKNYAYWYQQKPGQAPVLVIYKDSERPSGI
PERFSSSSSGTTVTLTISGAQAEDEADYYCYSGDGNS
>V229RF-AHZZ01105201.1-iglv |(63444, 63747)|2.99899600001|(1.000,1.000,0.999)|-1
SWAQSALTQPPSVSGSPGQSVTISCTGTSSDVGGYNYVSWYQQHPGTAPKLMIYDVSNRP
SGVSDRFSGSKSGNTASLTISGLQAEDEADYYCCSYTTS
>V230RF-AHZZ01105201.1-iglv |(75648, 75951)|2.98880001921|(0.999,0.992,0.998)|-1
SAASYELTQPPSVSVSPGQTARITCGGDNIGSEAVHWYQQKPPQAPVLVIYADSERPSGI
PERFSGSNSGNTATLTISGVEAGDEADYYCQVWDISNDH
>V231RF-AHZZ01106331.1-igkv |(10056, 10356)|3.0|(1.000,1.000,1.000)|-1
ARCDIQLTQSPSSLSASVGDRVTITCRASQGISSYLAWYQQKPGKAPKLLIYDASNLQSG
VPSRFSGSGSGTEFTLTISSLQPEDFAVYYCQQRNSYP
>V232RF-AHZZ01106331.1-igkv |(16128, 16428)|3.0|(1.000,1.000,1.000)|-1
AKCDIQMTQSPSSLSASVGDRVTITCRASQGISSYLAWYQQKPGKAPKPLIYYASNLESG
VPSRFSGSGSGTEFTLTISSLQPEDFATYYCQQYNSAP
>V233RF-AHZZ01106331.1-igkv |(33100, 33400)|2.99593600205|(1.000,1.000,0.996)|-1
ARCDIQMTQSPSSLSASAGDRVTITCRASQGISTYLNWYQQKPGKAPTRLIYAASSLQSG
VPSRFSGSGSGTEFTLTISSLQPEDFATYYCLQYNSAP
>V234RF-AHZZ01106331.1-igkv |(43583, 43883)|3.0|(1.000,1.000,1.000)|-1
TTGETVMTQSPATLSLSPGERATLSCRASQSVGSSLAWYQQKPGQAPRLLVYYASSRATG
IPDRFSGSGSGTDFTLTISSLEPEDVGVYYCQKYNDWP
>V235RF-AHZZ01107345.1-trbv |(266, 563)|2.9751523093|(0.998,0.984,0.994)|-1
PIDSGITQTPKHLVIGMTNKKSLKCEQHMGHRAVYWYKQKAKKPPEIMFMYNYETLSINE
SVPSRFSPECSKSSLLHLHLQALQPEDSALYLCASSQ
>V236RF-AHZZ01107346.1-trbv |(98987, 99285)|2.6448171394|(0.968,0.874,0.873)|-1
TQTPSHQVTQMGQEVILRCVPIPNHLNFYWYRQILGQKVEFLVYFYNDNISEKSEIFDDR
FSVERPDGSNFTLKIKSTKLEDSAMYFCASSEATALQ
>V237RF-AHZZ01107346.1-trbv |(105930, 106243)|2.84609578103|(0.995,0.979,0.905)|-1
SLDTAVSQTPKYLVTQTGKKESLKCEQNLGHDAMYWYKQDSKKLLKIMFSYNNKELIINE
TVPNRISPDSPDKAHLNLHIKSVELGDSAVYFCASSQATALQ
>V238RF-AHZZ01107346.1-trbv |(110556, 110852)|1.66430661007|(0.563,0.975,0.647)|-1
PIDSGVTQTPKHLVIGMTNKKSLKCEQHMGHRAVYWYKQKAKKPPEIMFMYNYETLSINE
SVPSRFSPECSKSSLLHLHLQALQPETQPCISAPAAQ
>V239RF-AHZZ01107395.1-igkv |(1617, 1915)|2.96736078502|(0.999,0.982,0.988)|-1
TTGEIVMTQSPATLSLSPGERATLSCRASQSVNSYLAWYQQKPGQAPRLLIYDASSRATG
IPDRFSGSGSGTDFTLTISSLEPEDVAVYFCLQSSNW
>V240RF-AHZZ01107399.1-igkv |(425, 725)|2.99899600001|(1.000,0.999,1.000)|-1
AKCDIQMTQSPPSLSASVGDRVTITCQASQGISNWLAWYQQKPGEAPKLLIYAASTLQSG
VPSRFSGSGSGTEFTLTISSLQPEDFATYYCQQHNSYP
>V241RF-AHZZ01108758.1-ighv |(6447, 6754)|2.99596000066|(1.000,0.999,0.997)|-1
VLSQVQLQESGPGVVKPSETLSLTCAVYGGSVSGSYWSWIRQAPGKGLEWIGEINGNSGS
TSYNPSLKSRVTISTDTSKNQFSLKLSSVTAADTAVYYCA
>V242RF-AHZZ01110488.1-igkv |(1345, 1645)|2.99899200002|(0.999,1.000,1.000)|-1
ARCDIQMTQSPSSLSASVGDKVTITCHASQSISSWLAWYQQKPGKAPKLLIYKASSLQSG
VPSRFSGSGSGTDFTLTISSLQPEDFATYYCQQYDSNH
>V243RF-AHZZ01111138.1-igkv |(1438, 1738)|3.0|(1.000,1.000,1.000)|-1
ARCDIQMTQSPSSLSASVGDKVTITCHASQGISSWLSWYQQKPGKAPKLLIYKASSLQSG
VPSRFSGSGSGTDFTLTISSLQPEDFATYYCQQYSSSP
>V244RF-AHZZ01111138.1-igkv |(3529, 3815)|2.94562999772|(1.000,0.967,0.984)|-1
IVMTQSPATLSLSPGERATLSCRASQSVSSRLAWYQQKPGEAPRLLIYDASSRATGIPAR
FSGSGSGTDFTLTISSLEPEDVAVYFCQQESNW
>V245RF-AHZZ01111138.1-igkv |(14203, 14503)|3.0|(1.000,1.000,1.000)|-1
ARCDIQMTQSPPSLSASVGDRVTITCQASQSISNYLAWYQQKPGKAPKLLIYAASTLQSG
VPSRFSGSGSGTEFTLTISSLQPEDFATYYCQRHNSYP
>V246RF-AHZZ01111367.1-igkv |(1438, 1738)|3.0|(1.000,1.000,1.000)|-1
ARCDIQMTQSPSSLSASVGDKVTITCHASQGISSWLSWYQQKPGKAPKLLIYKASSLQSG
VPSRFSGSGSGTDFTLTISSLQPEDFATYYCQQYSSSP
>V247RF-AHZZ01111367.1-igkv |(3529, 3815)|2.94562999772|(1.000,0.967,0.984)|-1
IVMTQSPATLSLSPGERATLSCRASQSVSSRLAWYQQKPGEAPRLLIYDASSRATGIPAR
FSGSGSGTDFTLTISSLEPEDVAVYFCQQESNW
>V248RF-AHZZ01111367.1-igkv |(14330, 14630)|3.0|(1.000,1.000,1.000)|-1
ARCDIQMTQSPPSLSASVGDRVTITCQASQGISNYLAWYQQKPGKAPKLLIYAASTLQSG
VASRFSGSGSGTEFTLTISSLQPEDFATYYCQQHNSYP
>V249RF-AHZZ01112481.1-ighv |(613, 919)|3.0|(1.000,1.000,1.000)|-1
VLSQVQLQESGPGVVKPSETLSLTCAVSGGSISSSYWSWIRQPPGKGLEWIGYIYGGGST
NYNPSLKSRVTMSADTSKNQLSLKLSSVTAADTAVYYCAR
>V250RF-AHZZ01125719.1-ighv |(24239, 24554)|3.0|(1.000,1.000,1.000)|-1
VQCEVQLVESGGGLVQPGGSLRVSCAASGFTFSNHYMQWVRQAPGKGLEWVGFIRNKANG
GTAEYAASVKGRFTISRDDSKSIASLQMNSLKTEDTAVYYCAR
>V251RF-AHZZ01125719.1-ighv |(41713, 42022)|3.0|(1.000,1.000,1.000)|-1
VQCEVQLAESGGGLVQPGGSLRLSCAASGFTFSSYEMHWVRQAPGKGLESVSVISGDSSY
THYADSVKGRFTISRDNAKNSLSLQMNSLRAEDTAVYYCAR
>V252RF-AHZZ01125719.1-ighv |(47992, 48299)|2.9700882474|(1.000,1.000,0.973)|-1
AHAQVQLVQSGPEVKQPGASVKVSCKASGYTFTSYGMNWVRQAHGQRLEWMGWINTDSGN
PTYAQGFKERFTFSMDTSISTAYLQISSLKAEDTAVYYCA
>V253RF-AHZZ01181503.1-ighv |(302, 609)|2.9700882474|(1.000,1.000,0.973)|-1
AHAQVQLVQSGPEVKQPGASVKVSCKASGYTFTSYGMNWVRQAHGQRLEWMGWINTDSGN
PTYAQGFKERFTFSMDTSISTAYLQISSLKAEDTAVYYCA
>V254RF-AHZZ01185532.1-igkv |(806, 1093)|2.99899200002|(0.999,1.000,1.000)|-1
TVVTQSPATLSLSPGERATISCRTSQSVGSRLAWYQQKPGQAPRLLIYGASNRATGIPDR
FSGSGSGTDFTLTISSLKPEDAAVYYCQQDNDWK
>V255RF-AHZZ01189918.1-igkv |(12178, 12478)|3.0|(1.000,1.000,1.000)|-1
ARCDIQMTQSPSSRSASVGDTVTITCQASQGISDYLAWYQQKPGKAPKLLIYAASNLESG
VPSRFSGSGSGTDFTLTISSLQPEDFATYYCQQYDSDP
>V256RF-AHZZ01189922.1-igkv |(4528, 4816)|3.0|(1.000,1.000,1.000)|-1
IVMTQSPATLSLSLGETATISCRTSQSVGSKLAWYQQKPGQAPRLLIYGASSRATGIPDR
FSGSGSGTDFTLTISSLEPEDFAVYYCQETSNLS
>V257RF-AHZZ01189923.1-igkv |(14019, 14319)|2.99496000066|(0.997,0.998,1.000)|-1
ARCDIQMTLSPSSLSASVGDRVTITCRASQDISSYLNWYQQKPGKAPKLLIYYATSLESG
VPSRFSGSGSGTDFTLTISSLQPEDFATYYCQQFKSYP
>V258RF-AHZZ01198550.1-iglv |(8130, 8433)|3.0|(1.000,1.000,1.000)|-1
SWAQAALTQPHSVSGSPGQSVTISCTGTSSDIGGYDRVSWYQQHPGKAPKLMIYEVSKRP
SGVSDRFSGSKSGNTASLTISGLQAEDEADYYCSSYAGS
>V259RF-AHZZ01198550.1-iglv |(32463, 32773)|2.96248712253|(0.996,0.971,0.998)|-1
SWAQSALIQSPSVSGSLGQSVTISCTGTSSDIGRYNYVSWYRQQPGTTTKLMMYNVNTRP
SGVSDRFSGSKSGNTASLTISGLQAEDEADYYCSSYEASDT
>V260RF-AHZZ01198551.1-iglv |(10418, 10728)|2.99594800078|(0.997,1.000,0.999)|-1
SWAQSAPTQPPSVSGSPGQSVTISCTGTSSDIGYYNAVSWYQQHPGTAPKLMIYRVSNRP
SGVSDRFSGSKSGNTASLTISGLQAEDEADYYCSSYAGSDT
>V261RF-AHZZ01198551.1-iglv |(33935, 34238)|2.99194800078|(0.999,0.996,0.997)|-1
SAASYELTQPPSVSVSPGQMARITCSGDALPEKYADWYQQKPGQSPVLIIYEDSKWPSGI
PERFSGSSSGTVATLTISGAQVEDEADYYCYSTDSSGNH
>V262RF-AHZZ01198553.1-iglv |(13429, 13732)|2.8248467507|(0.996,0.992,0.885)|-1
SVVSSELTQDPAVSVALGQTVRITCQGDSLSSYYASWYQQKPGQAPVLVIYGNNNRPSGI
PERFSVSWSGNTGSLTITGAQVEDEADYYCGSWDSSGNH
>V263RF-AHZZ01198553.1-igkv |(31919, 32222)|2.68664512543|(0.913,0.856,0.932)|-1
SWAQAALTQPPSVSKSLGQSVTISCAGTSSGIASYSDVSWYQQHPGTAPRLLIYSVSNRP
SGVSDRFSGFKSGSTASLTISGLQAEDEAIYYCCSYRSG
>V264RF-AHZZ01198553.1-iglv |(39757, 40060)|2.99393200206|(0.999,0.995,1.000)|-1
SEASYELIQPPSVSVSPGQTARITCSGDALPDYYAYWYQQKSGQAPMLVIYKDSERPSGI
PERFSGSSSGTTVTLTISGVQAEDEADYYCQSADSSGNH
>V265RF-AHZZ01198553.1-iglv |(56860, 57163)|2.99799600001|(0.999,0.999,1.000)|-1
SATSYELTQPPSVSAASGQTARITCGGDSIGSKNVQWYQQKPAQAPVLVIYADSKRPSGI
PERFSGSNSGNTATLTISGVEAGDEADYYCQVWDSSSKH
>V266RF-AHZZ01198553.1-iglv |(68992, 69302)|2.99192000218|(0.998,1.000,0.994)|-1
SWAQAALTQPPSVSGSPGQSVTISCTGTSSDIGGYNYVSWYQQHPGKAPKLMIYEVSKRP
SGVSDRFSGSKSGNTASLTISGLQAEDEADYYCGSYASSST
>V0RF-JZKE01005121.1-trbv |(3942, 4254)|2.98699600001|(0.996,0.995,0.996)|1
LVETKVTQTPRHLVKRTGEKVLLKCSQDMDHERMFWYRQDPGLGLRLIYFSYDVDNDEKG
DVSEGYSASRKKKEYFPLVLESASTNQTSVYLCASRYPQRCT
>V1RF-JZKE01068552.1-trbv |(289, 585)|1.77850884751|(0.968,0.882,0.516)|1
SMNAGVTQTPRFQILETGQNMTLRCVQDMNHNNMYWYRQDPGLGLRLIHYSVGAGTTANG
EVPEGYSVSRSSTKNFPLTLGSATPSQTSVYFCASSD
>V2RF-JZKE01073331.1-trdv |(5473, 5772)|1.70777606712|(0.804,0.640,0.567)|1
SIVAQKVTQAQTARSTTVGQTVTLNCQYETSRIYYTINWYKQLPSKEMIFLLRQGSNSQN
AKDGRYSVNFRKEAKSIDLTISDLRLEDLAKYFCALCE
>V3RF-JZKE01214711.1-trav |(1444, 1730)|1.52326106549|(0.564,0.425,0.622)|1
RMMSITKKTGSYIIITCDIQQSTSQYIHWYLFQEGRTPQRILYYDLVSSKTVLESGFSLE
KYHAYASRGKSSRFILQNLEESDSGVYYCATWS
>V4RF-JZKE01218258.1-igkv |(171021, 171321)|2.99798400013|(1.000,1.000,0.998)|1
ARCDIQMTQSPSSLAASLGDTVTITCQASQGISNYLSWYQQKPGQSPKILIYGASNLETG
VPSRFSGSGSGTDFTLTISSLQPEDFATYYCLQSYNYP
>V5RF-JZKE01218259.1-igkv |(864, 1179)|2.96440247224|(0.999,0.969,1.000)|1
SSGEIVMTQTPLSLPVTLGEPASISCRSSQSLLHSNGNTYLSWYLQKPGQSPQLLIYLGF
TRASGVPDRFSGSGSGTDFTLKISKVEAEDVGVYYCMQTIQVP
>V6RF-JZKE01218259.1-igkv |(11427, 11740)|2.91406097516|(0.971,0.957,0.988)|1
SSGDIVMTQTPLSLSVTPGESASISCTASQNIQNTKGNTYLNWFLQKPGQPPKRLIYKIS
NRDSGVSDRFSGSGSGTDFTLEISRVEAEDVGVYYCMQASYY
>V7RF-JZKE01218269.1-igkv |(713, 1028)|2.92679088874|(0.996,0.943,0.999)|1
SSGEIVMTQTPLSLPVTPGEPASISCSSSQSLLHSNGNTYLYWYLQKPGQSPQLLIYRVS
NRLSGVPDRFSGSGSGTDFTLKISRVEAEDVGVYYCMQALQFP
>V8RF-JZKE01218271.1-igkv |(2296, 2608)|1.7128332135|(0.988,0.513,0.865)|1
ACGDIVMTQSPGSLAASPGERVTINCKSSQSLLYNNNNYLAWYQQKPGQAPKVLISWAST
RASGVPDRFSGSGSGTDFTLTISSLQAEDVAVYYCAQYYNYP
>V9RF-JZKE01244686.1-ighv |(3631, 3937)|2.99796800026|(0.998,1.000,1.000)|1
VQCEVQLVESGGGLVQPGGSLTLSCVASGFTFSSYAMCWVRQAPGKGLEWVSAIGSGGGT
YYADAVKGQFTISRDNSKNTLSLQMKSLQAEDTAMYYCAR
>V10RF-JZKE01244690.1-ighv |(27, 336)|2.99385601037|(1.000,1.000,0.994)|1
VQCEVQLVESGGGLVQPGGSLRLSCAASGFTFDDYAMHWVRQAPGKGLDWVSVINWNGDY
INYADAVKGRFTISRDNSKNSLYLQMNSLRAEDTAVYYCAR
>V11RF-JZKE01244709.1-ighv |(12, 321)|3.0|(1.000,1.000,1.000)|1
VQCEVQLVESGGGLVQPGGSLRLSCAVSGFTVSNYYMSWVRQAPGKGLEWVSYIYSDDGD
TNYADAVKGRFTTSTDNGKNMLYLQMNSLRTEDTAVYYCAR
>V12RF-JZKE01244710.1-ighv |(1079, 1388)|3.0|(1.000,1.000,1.000)|1
AQCEVQLVESGGGLVQPGGSLTLSCAASGFTFSDYYMSWVRQAPGKGLEWVSRISNTGGS
TWYADAVKGRFTISRDNSKNTLSLQMNSLRAEDTAVYYCAR
>V13RF-JZKE01244715.1-ighv |(308, 614)|2.99799200002|(1.000,0.999,0.999)|1
VRCEVQLVESGGGLVQPGGSLTLSCAASGFTFSSYAMHWVRQAPGKGLEWVSRINSGGST
SYADAVKGRFTISRDNSKNMLSLQMNSLRSEDTAVYYCTR
>V14RF-JZKE01249931.1-iglv |(10411, 10721)|2.66872974033|(0.974,0.956,0.825)|1
SLSQPVLTQPPSLSASPGASARLTCTLSSGTVVGGYHISWYQQKPGSRPRYLLRYHSDSN
KHQGSGIPSRFSGSKDASANAGILHISGLQPNDEADYYCLT
>V15RF-JZKE01249932.1-iglv |(5041, 5344)|2.88716819862|(0.956,0.968,0.964)|1
SLSQPVLTQPPSASASLGASAKLTCTLSSAHSGYTIAWYQQQPGKAPQYLMYVKSDGRHS
KGDGIPDHFSGSSSGADRYLTISNIQPEDEADYICGADY
>V16RF-JZKE01249932.1-iglv |(7450, 7753)|2.88716819862|(0.956,0.968,0.964)|1
SLSQPVLTQPPSASASLGASAKLTCTLSSAHSGYTIAWYQQQPGKAPQYLMYVKSDGRHS
KGDGIPDHFSGSSSGADRYLTISNIQPEDEADYICGADY
>V17RF-JZKE01249933.1-iglv |(3726, 4036)|2.8312268109|(1.000,0.969,0.903)|1
SLSQPVLTQPPSLSASPGASARLTCTLSSGFSVGSYAIYWYQQKPGSPPRYLLSYYSDSD
KHQGSGVPRRFSGSKDASANVGILHISGLQPEDEADYYCMV
>V18RF-JZKE01249942.1-igkv |(820, 1133)|1.85101560124|(0.585,0.632,0.674)|1
SLSQPVLTQPPSASASPGASAKLTCTLSSAHSSYTIAWHQQQPGKAPRYLMWVNSAGSHS
KGDGIPDRFSGSSSGADRYLTISNIQPEDEADYYCQTWDSGI
>V19RF-JZKE01249944.1-iglv |(1831, 2141)|2.99280401921|(1.000,0.993,1.000)|1
SLANVVLTQPSSVSGSPGQKVTISCTRSSGNIGDNYVHWYQQRPGSAPTTVIYADDKRPS
GVPDRFSGSIDSSSNSASLTISGLQSEDEADYYCQSYGSSA
>V20RF-JZKE01249947.1-iglv |(5356, 5654)|1.64358186599|(0.507,0.651,0.688)|1
SLSQPVLTQPPTASASLGASVTLACTPSSGHSGYAVDWHQQSPGKGSRFVMRVGSGGVVG
SKGDGIPEGFSVSGSGLDRYLTIRNNQEDEADYHCGA
>V21RF-JZKE01249954.1-iglv |(2355, 2642)|2.30173807534|(0.818,0.706,0.827)|1
PAVSVALGQTARISCQGDDHISNFVPTNWYQQKPGQAPVLVIYGNSNRPSGIPERFSGSK
SGTTATLTISGAQAGDEADYYCQSLDMSGNNHTV
>V22RF-JZKE01249955.1-iglv |(302, 602)|2.26764732968|(0.960,0.651,0.975)|1
SVASQLTQVPAASVALGQTARITCQEDGIRRFFTNWYQQKPGETPVLLIYDSSKQPSGIP
ERFSGSKSGTTATLTISGAQAGDEADYYCQSFDISSNY
>V23RF-JZKE01249956.1-igkv |(66, 357)|2.32455079806|(0.896,0.772,0.774)|1
SMASQLTQEPSVSVALGQTARMTCQGDSLRSYYASWYQQKPGQAPVLVIYSNSNRPSGIP
ERFSGSKSGTTATLTISGAQAEDEADYYCGSYTGS
>V24RF-JZKE01249956.1-iglv |(5127, 5437)|2.93943912445|(0.971,0.996,0.975)|1
SGAQSALTQPSSVSGNPGQSVTISCAGTSSDVGKYNYVSWYQQHPGTAPKLLIYNVNTRT
SGIPDRFSGSKSGNTASLTISGLLAEDEADYHCSSYRSGNA
>V25RF-JZKE01249957.1-iglv |(3969, 4267)|2.97600040988|(0.999,0.994,0.984)|1
SVASQLTQVPAVSVALGQTARITCQGDSLSSYYPNWYQQKPGQAPVLVIYGNSNRPSGIP
ERFSSSDSGTTATLTISGAQAGDEADYYCGSYAGSDT
>V26RF-JZKE01249957.1-iglv |(9221, 9531)|2.89853971076|(0.965,0.998,0.942)|1
SGAQSALTQPSSVSGNPGQSVTISCAGTSSDIGKYNYVSWYQQHPGTAPKLLIYNVNTRA
SGIPDRFSGSKSGNTASLTISGLLAEDEADYHCSSYRSGNA
>V27RF-JZKE01249957.1-igkv |(15254, 15557)|2.02827687263|(0.675,0.814,0.624)|1
FVASDELTQPHSVSVSPGQTAKITCSGDSLAKKYASWLQQKPGQSPVLVIYKDSERPSGI
PERFSGSSSGTTVTLTITGAQVEDEADYYCQSRDSSGTH
>V28RF-JZKE01249958.1-iglv |(6051, 6351)|2.83465800141|(0.973,0.905,0.975)|1
SVASQLTQVPAASVALGQTARITCQEDGIRSFFTNWYQQKPGEAPVLLIYDSSKQPSGIP
ERFSGSKSGTTATLTISGAQAGDEADYYCQSFDISSNY
>V29RF-JZKE01249959.1-iglv |(447, 745)|2.96726023048|(0.995,0.982,0.991)|1
SVASYELTQPPSVSVSPGQTARITCGGNNIGNKYAYWHQQKAGQAPVLIIYSDSNRPSGI
PERFSGSNSGNTATLTISGTQAGDEADYYCQVWDGSN
>V30RF-JZKE01255160.1-ighv |(7108, 7423)|2.99899200002|(0.999,1.000,1.000)|1
VQCEVQLVESGGGLVQPGGSLTLSCAASGFSFSNYWMHWVRQAPGKGLEWVSSIGNDGST
SYADAVKGRFTISRDNDKNTLSLRMNSLRAEDTAVYYCARETV
>V31RF-JZKE01296733.1-igkv |(5866, 6179)|2.9843881665|(1.000,0.997,0.988)|1
SSGDIVMTQTPLSLSVTPGESASISCTASQSILHTDGNTYLNWLLQKPGQPPKRLIYKIS
NRDSGVSDRFSGSGSGTDFTLEISRVEAEDVGVYYCMQASYY
>V32RF-JZKE01097728.1-igkv |(2698, 3010)|2.99080001921|(0.999,0.992,1.000)|-1
ACGDIVMTQSLRSLAVSPGERVTIDCKSSQSLLSNNKNYLAWHQQKPGQAPKLLIYWAST
RASGVPDRFSGSGSGTDFTLTISSVQAEDVAVYYCQQYHSTP
>V33RF-JZKE01143868.1-trav |(15192, 15493)|2.95242016586|(0.988,0.989,0.976)|-1
SSVAQTVTQSQPEMSVQEAGTVTLDCTYATSDSNYYLFWYKQPPSRQMILIIRQEAYKQQ
NATENRFSVNFQKAAKSFSLEISDSQLEDAAMYFCAFM
>V34RF-JZKE01143869.1-trav |(6274, 6564)|2.99089600501|(0.995,0.996,1.000)|-1
VSSEDKVIQSPSSLAVHEGDSATLTCNYEVSYFQSLQWYKQEKNAPTFLFTLTSSGIEKK
SGRLSSILDNKELLSTLNITATQTRDSAIYFCAVE
>V35RF-JZKE01143870.1-trav |(3358, 3666)|1.56844412701|(0.533,0.466,0.727)|-1
VNSQQKDNDQEVKQNSPSLSVQEGGISVLNCDYTNNMFDYFLWFKQYPAKGPALLISTSS
VVDKKVDGRFTVFSNRSAKHLSLHIAASQPGDSALYLCAAS
>V36RF-JZKE01143870.1-trav |(12640, 12943)|1.76394566499|(0.562,0.779,0.805)|-1
SSMSQQVIQSQSAISKQEGETVKLECSYNTSVPYHILYWYKRPPSGEIIFLIFQHTDTDT
NATQGQYSVSFQKAAKTIRLIISPSQLEDSATYFCCLRE
>V37RF-JZKE01143870.1-trdv |(43747, 44046)|1.70777606712|(0.804,0.640,0.567)|-1
SIVAQKVTQAQTARSTTVGQTVTLNCQYETSRIYYTINWYKQLPSKEMIFLLRQGSNSQN
AKDGRYSVNFRKEAKSIDLTISDLRLEDLAKYFCALCE
>V38RF-JZKE01143871.1-trav |(16684, 16984)|2.08505453762|(0.864,0.753,0.664)|-1
RTGAQSVAQPDVHVTVSEGDPLKLRCTYSGGVVTSYLFWYIRYPGQSLQFLLKYTSGDTL
VKGMKGFEAELRKNESSFHLKKHSARLSDSAQYFCAVS
>V39RF-JZKE01143872.1-trdv |(10578, 10878)|1.83199599484|(0.771,0.558,0.693)|-1
STVAQKVTQAQTARSMTVGRTVSLNCRYETSWNYYYIFWYKQLPSKEMIFLLYQYSGNQN
AKDGRYSVNFRKEVKSIDLTISALRLEDSAKYYCALAE
>V40RF-JZKE01143872.1-trav |(21701, 22001)|2.04830534207|(0.782,0.641,0.718)|-1
LNGQEVKQIPQFLHIQEGEDFSTYCNSTSTLNTVQWYKQRPGGSPVLLMILVKSGEVKKE
KRLTAQFGETRKDSSLHITAAQTADVGTYFCAVAQCSP
>V41RF-JZKE01143873.1-trdv |(6157, 6456)|2.98066005261|(0.990,0.999,0.992)|-1
STVAQKVTQYQATTSMTEGQAVTLNCQYETSSTTYFICWYKQLPSKEMIFLLRQGSTSQN
AKDGRYSVNFRKEAKSINLTISALRLEDSAKYFCALWD
>V42RF-JZKE01143873.1-trdv |(14264, 14561)|1.9210613815|(0.675,0.594,0.678)|-1
SVAQKVTQSQSARSTTEGRAVTLNCRYETSWSYYYIFWYKQLPSKEMIFLLRQDSDGGNA
NNGRYSVSFRKEVKSIDLTISALRLEDSAKYYCALAE
>V43RF-JZKE01143874.1-trdv |(2471, 2770)|2.96457605748|(0.987,0.996,0.982)|-1
STVAQKVTQAQTATTRTVGQAVTLNCQYEASWSSYYIYWYKQLPSNEMIFLLRQYSGDQN
AKNGRYSINFQKEAKSIDLTISALRLEDSAKYFCALWD
>V44RF-JZKE01143890.1-trav |(1103, 1400)|2.9969280013|(0.997,1.000,1.000)|-1
RSNGDSVTQTEGTVTLPEGAPVILNCTYETTYSVSYLFWYVQYLNQSPQLLLKSSTENQR
GENRGFQANLVKSDKSFHLEKSSLRMSDSAVYYCALS
>V45RF-JZKE01143891.1-trav |(1676, 1998)|2.79449814152|(0.928,0.961,0.911)|-1
TNGDSVTQTEGPVTLPEGEALTLNCTYQSSYAAFLFWYVQFQNKEPVLLLKSSSETQEMD
SRGFQANNVKSDSSFHLKKPSVQLSDSAVYYCAMRDTARGTAGGA
>V46RF-JZKE01143891.1-trav |(8677, 8980)|2.99196000066|(0.996,0.999,0.997)|-1
PSMAQKVTQAQPEISVVEKESVTLDCVYETRDPTYYLFWYKQPPSGEMIFLIRQDSFNEK
NETKDRYFLNLQKSTSSISLTITASQLMDSAVYFCALRE
>V47RF-JZKE01143893.1-trav |(6613, 6900)|2.98074002125|(0.990,0.997,0.994)|-1
VNSQQGEENPQALSIQEGENATINCSYKSSISNLQWYRQDSGRGLTLLILIRANKREEHH
GRLTVTLNTSIKSSSLIITASCAADSATYFCATD
>V48RF-JZKE01143895.1-trav |(12286, 12579)|2.98356408064|(0.997,0.987,1.000)|-1
VSGGENVGLHPPTLNVQEGDTSVINCTYSNSASNYFPWYKQELGKGPQFIIDIRSNMDNK
QEQRFTVLLNKTAKHLSLHIAGTQAGDSAVYFCAES
>V49RF-JZKE01143895.1-trav |(15624, 15933)|3.0|(1.000,1.000,1.000)|-1
AGIAQKVTQSQPAMSVQEKEAVTLDCTYDTSTSVTSYTLFWYKQPSSGEMILLIRQDSYN
QQNATEGRYSLNFQKASKSIKLVISASQVGDSAIYFCALSE
>V50RF-JZKE01143895.1-trav |(22481, 22772)|2.99698000014|(0.998,1.000,0.999)|-1
VRSQQKEVEQTPESLSVSEGATASLNCTYSNTASQYFTWYRQYSGKGPELLVSIYSNGDK
EEERFTVHLNMASRYVSLLIRDSQPSDSATYLCAV
>V51RF-JZKE01143895.1-trav |(26982, 27279)|1.91088750623|(0.848,0.578,0.765)|-1
GTGAQTVTQPDLHVTVTEGASLELRCNYSVSFTPSLWWYVQYPNQGLQLLLKYVSGSTLV
KGIQGFEAEFRKNESSFHLRKTFAHLSDSAQYFCAVS
>V52RF-JZKE01143896.1-trav |(1244, 1537)|2.98498000014|(0.994,0.995,0.996)|-1
VRGGENMGLHPPNLSVQEGDTSVINCTYSNSNSDYFCWYKQEPGKGPQFIMDIRSNKDKK
QEGRFTILLNKMAKHLSLHIAGTQAGDSAAYLCAES
>V53RF-JZKE01143896.1-trav |(8327, 8630)|2.99180001921|(1.000,0.993,0.999)|-1
SGIAQKVTQVQPAMLVQEKEAVTLDCTYDTSDSRYTLFWYKQPSSGEMLLLIRQDSYNQQ
NATEGRYSLNFQKANKSIKLVISASQVGDSAIYFCALME
>V54RF-JZKE01143896.1-trav |(15626, 15938)|2.98332422844|(0.999,0.999,0.986)|-1
VRSQQKEVEQTPESLSVSEGATASLNCTYSNTASQYFAWYRQYSGKGPELPVSIYSTGDK
EEEGRFTVQLNKGSRYVSLLIRDSQPSDSATYLCAVSTQCSP
>V55RF-JZKE01143902.1-trav |(453, 744)|2.99899600001|(1.000,1.000,0.999)|-1
VRSQQKEVEQTPESLSVSEGATASLNCTYSNTASQYFAWYRQYSGKGPELLVFIYSTGDK
EEGRFTVQLNKASRYVSLLIRDSQPSDSATYLCAV
>V56RF-JZKE01143903.1-trav |(641, 935)|2.99599600001|(0.999,0.999,0.998)|-1
RTHGDSVTQMEGQVTLSEEAFLTINCTYTATGYPALFWYVQYPGEGPQLLLKATKANDKG
INKGFEATYKRETTSFHLEKASVHESDSAVYYCALS
>V57RF-JZKE01143910.1-trav |(6899, 7192)|2.97450008499|(0.990,0.985,1.000)|-1
VSGKNQVEQGPQSLIIPEGENCTLQCNYTVSPFNNLRWYKQETGRGPVSLIIMNYSKSKE
SNGRYTATLDASAKQSSLHITASQLSDSASYICVAS
>V58RF-JZKE01143910.1-trav |(50038, 50331)|2.93883447505|(0.993,0.954,0.998)|-1
VSGGENVGLHPPTLNVQEGDTSVINCTYSDSASIYFPWYKQELGKGPQFITDIRSNMDNK
QEQRFTVLLNKTAKHLSLHIAGTQAGDSAVYFCAES
>V59RF-JZKE01143910.1-trav |(57835, 58138)|2.99498000014|(0.998,0.997,1.000)|-1
AGVAQKVTQSQPAMLVQEKEAVTLDCTYDTSDSSYGLFWYKQPSSGEMLLLIRQDSYNQQ
NATEGRYSLNFQKARKSIHLVISALQLGDSAIYFCALSE
>V60RF-JZKE01143913.1-trav |(1691, 1985)|2.87585799131|(0.955,0.934,0.995)|-1
RTYGNTVTQGEGQVTLSEGAFLTINCTYTSTGYPTLFWYVQYPGEGPQLFLKATQANDKA
INKGFEATYKRETTSFHLEKASVHESDSAMYYCVLS
>V61RF-JZKE01143915.1-trav |(12659, 12952)|2.98879201242|(0.993,0.997,0.999)|-1
VSRGENVEQRPSTLHVQEGDTSVINCTYSDSASSYFPWYKQELGKGPQLFIDIRSNLDKK
QDQRITLLLNRMTKHLSLHIAATQPGDSAVYFCVAS
>V62RF-JZKE01143915.1-trdv |(19560, 19869)|2.76619314055|(0.937,0.924,0.909)|-1
SSITQKVTQDQPAMLVQEKEAVTLDCTYDTSTSVNNFALFWYKQPSSGEMLLLIRQDSYN
QQNATEGRYSLNFQKAKKSIHLLISASQLEDSAMYFCALKK
>V63RF-JZKE01143916.1-trav |(14368, 14665)|2.04763138924|(0.955,0.790,0.675)|-1
GLRAQSVTQPEDQVTVSEGNPLTVKCTYSYSGSPYLFWYVQYPNEGLQFLLKYIRGDNLV
KGSHGFEAEFNKSQTSFHLKKASACGSDSALYFCAVS
>V64RF-JZKE01143916.1-trav |(31693, 32009)|2.27375262875|(0.781,0.914,0.684)|-1
QSVTQPDGHITVSEGDPLELRCNYSSSVPPSLFWYVQYPNQGLQLLLKYTSGNSLVTGIK
SFKAEFNRSETSFQLKKASAHLSDSAQYFCAVSDTVPGAAGGA
>V65RF-JZKE01143916.1-trav |(38882, 39172)|2.98999600001|(0.997,0.997,0.996)|-1
ISRGEKVEQSPFLSVQEGDSSVINCTYTESTSTYFYWYKQGPGEGPQLLMTILSSMDKKQ
EQRLSVLLNKREKHLSLHISDTQPGDSAVYFCAVS
>V66RF-JZKE01143916.1-trav |(40477, 40765)|2.97966002957|(0.989,0.995,0.996)|-1
VNSQKIEQNPRALNIHEGETAAVTCNYTSYSPAFLQWYRQDPERGLVFLLLIRENEGEKQ
EGRLKVTFDTTHKQSSFYITDSQPADSATYLCAA
>V67RF-JZKE01143916.1-trav |(59581, 59872)|2.98996000066|(0.996,0.999,0.995)|-1
SHGDSVTQTDGQMLLTEGDSLIVNCSYETRQYPALFWYVQYPGEGLQLLLKAAKANDKGI
NKGFEATYNRETTSFHLEKASVHVSDSAVYYCALS
>V68RF-JZKE01143916.1-trav |(65263, 65563)|1.87866471197|(0.854,0.763,0.570)|-1
DARAQSVTQPDLSITVSEGASLELRCNYSYRGGNVYLFWYVQYPGQGLQLLLRYYSGNTL
VQGMKGFEAEVRKNEFSFTLRKPSVHWSDAAEYFCALS
>V69RF-JZKE01196378.1-trbv |(847, 1154)|2.96209640489|(0.993,0.992,0.978)|-1
HTDAGITQNPRFRVTETGKQVTLRCHQTDKYDYMYWYRQDLGRGLRLIHYSYGVQRTDKG
EFSEGYNVSRSDMEDFPLTLESATPSQTSVYFCAISDSTA
>V70RF-JZKE01235368.1-ighv |(1130, 1439)|3.0|(1.000,1.000,1.000)|-1
VQCQVQLVESGGGLVQPGGSLTLSCAASGFTFSSYWMYWVRQAPGKGLEWVSSINYGGGS
TYYADGVKGRFTISRDNSKNTLSLQMNSLRAEDTAVYYCAK
>V71RF-JZKE01238797.1-iglv |(185, 497)|2.99696400065|(1.000,1.000,0.997)|-1
SWAQSALTQPPSVSGAPGQTVTISCTGSSSNIGGGYYASWYQQLPGSAPKLLIYYDSDRP
SGIPARFSGSKSGSSASLTITGLQAEDEADYYCAAWDTSLSG
>V72RF-JZKE01238797.1-iglv |(4422, 4732)|2.99696400065|(1.000,0.997,1.000)|-1
SLANFVLTQPSSVSGSPGQKVTISCTRSSGNIGDNYVSWYQQRPGSAPTTVIYDDNQRPS
GVPDRFSGSIDSSSNSASLTISGLQSEDEADYYCQSYDSSA
>V73RF-JZKE01238799.1-iglv |(2255, 2565)|3.0|(1.000,1.000,1.000)|-1
SLANFVLTQPSSVSGSPGQKVTISCTRSSGNIGSYYVHWYQQRPGSAPTTVIYNDNQRPS
GVPDRFSGSIDSSSNSASLTISGLQSEDEADYYCQSYDSSA
>V74RF-JZKE01238800.1-iglv |(606, 916)|2.93349471963|(0.999,0.969,0.972)|-1
SLSQPVLTQPPSLSASPGASARLTCTLSSGFSVGSYAIYWYQQKPGSPPRYLLSYYSDSS
KHQGSGVPSRFSGSKDASANAGILHISGLQPEDEADYYCMA
>V75RF-JZKE01238817.1-iglv |(491, 803)|2.15630733559|(0.710,0.701,0.753)|-1
RWAEVVFTQPHSVSGSPGQKVIISCTRSSGNVGDNYVSWYQQRPGSAPTAVIYDDDQRPS
GVPDRFSGSIDSSSNSASLIISGLQPDDDADYHCLSGYDNYY
>V76RF-JZKE01255181.1-ighv |(445, 754)|2.99899600001|(1.000,1.000,0.999)|-1
VQCEVQLVESGGGLVQPGGSLTLSCAASGFTFSDYYMHWVRQAPGKGLEWVSYISSSGGS
TYYADAVKGRFTISRDNSKNTLSLQMNSLRAEDTAVYYCVR
>V77RF-JZKE01255182.1-ighv |(1026, 1335)|3.0|(1.000,1.000,1.000)|-1
VQCEVQLVESGGGLVQPGGSLTFSCAASGFTFSSYNMHWVRQAPGKGLEWVSYISNTGGS
TYYAEAVKGRFTISRDNSKNTLSLQMNSLRAEDTAVYYCAG
>V78RF-JZKE01278248.1-ighv |(4833, 5139)|3.0|(1.000,1.000,1.000)|-1
VQCEVQLVESGGGLIQPGGSLTLSCAASGFTISSYYMDWVRQASGKGLEWVSAISSGGST
YYADAVKGRFTISRDNSKNTLSLQMNSLRAEDTAVYYCAR
>V79RF-JZKE01278249.1-ighv |(3382, 3691)|2.91740247224|(0.964,0.963,0.994)|-1
IQCEVHLVESGGGLVQPGASLKLSCAASGFSFSSYGMNWVRQAPGKGLEWVSHIDYDAGS
TYYADAVKGRFTISRDNSKNTLSLQMNSLRAEDTAMYYCAR
>V80RF-JZKE01278253.1-ighv |(3391, 3700)|2.9889000027|(0.996,1.000,0.993)|-1
VQCEVQLVESGGGLVQPGGSLRLSCAASGFTFSDYYMHWVRQAPGKGLEWVSYIYSDGGD
TNHADAVKGRFTTSTDNGKNMLYLQMNSLRAEDTAVYYCAR
>V81RF-JZKE01278255.1-ighv |(2535, 2844)|3.0|(1.000,1.000,1.000)|-1
VQCEVQLVESGGGLVQPGGSLTLSCAASGFTFSSYWMYWVRQAPGKGLEWVSSINSGGGS
TYYADAVKGRFTISRDNSKNTLSLQMNSLRAEDTAVYYCAK
>V82RF-JZKE01278267.1-ighv |(5092, 5401)|3.0|(1.000,1.000,1.000)|-1
VQCEVQLVESGGGLVQPGGSLRLSCAASGFTFSSYGMNWARQAPGKGLEWVSTINYDGSS
TSYADAVKGRFTISRDNSKNTIYLQMNSLRAEDTAVYYCAK
>V83RF-JZKE01278268.1-ighv |(3308, 3617)|3.0|(1.000,1.000,1.000)|-1
VQCEVQLVESGGGLVQPGGSLTLSCVASGFTFSSYYMHWVRQAPGKGLEWVSYINTAGGS
TSYADAVKGRFTISRDNSKNTLSLQMNSLRAEDTAVYYCAR
>V84RF-JZKE01278271.1-ighv |(48, 354)|3.0|(1.000,1.000,1.000)|-1
VQCEVQLVESGGGLAQPGGSLTLSCAASGFTFSNYGMHWVRQAPGKGLEWVSAISSGGST
YYADAVKGRFTISRDNSKNTLSLQMNSLRTEDTAVYYCAK
>V85RF-JZKE01278271.1-ighv |(7402, 7711)|3.0|(1.000,1.000,1.000)|-1
VQCEVQLVESGGGLVQPGGSLTLSCAASGFTFSSYDMSWVRQAPGKGLEWVAVIWADGSK
QYYADSVKGRFTISRDNGKNMLYLQMNSLRAEDTAMYYCAS
>V86RF-JZKE01278273.1-ighv |(24, 333)|3.0|(1.000,1.000,1.000)|-1
VQCEVQLVESGGGLVQPGGSLTLSCAASGFTFSSYVMYWFRQAPGKGLEWVSRISSSGGS
TSYADALKGRFTISRDNSKNTLSLQMNSLRAEDTAVYYCAK
>V87RF-JZKE01278276.1-ighv |(456, 765)|3.0|(1.000,1.000,1.000)|-1
VQCEVQLVESGGGLVQPGGSLKLSCAASGFTFSSYGMNWVRQAPGKGLEWISHINYDAGS
TYYADAVKGRFTISRDNSKNTLSLQMNSLKAEDTAVYYCAK
>V88RF-JZKE01278277.1-ighv |(1432, 1741)|2.99899600001|(1.000,0.999,1.000)|-1
VQCEVQLVESGGGLVQPGGSLTLSCAVSGFTVSSYGMNWVRQAPGKGLEWVSYIYSDGGS
TNYADAVKGRFTTSTDKSKNTLSLQMNSLRAEDTAVYYCAR
>V89RF-JZKE01278602.1-ighv |(13, 322)|2.99899200002|(0.999,1.000,1.000)|-1
VQCEVQLVESGGGLVQPGGSLTLSCAASGFTFSSYWMSWVRQAPGKGLEWVSTISHTGGS
TYYADALKGRFTISRDNSKNTLSLQMNSLRTEDTAVYYCAR
>V90RF-JZKE01278602.1-ighv |(4600, 4909)|2.997|(0.999,0.999,0.999)|-1
VQCEVQLVESGGGLVQPGGSLRLSCVASGFTFSSYVMYWFRQSPGKGLEWVSRISSSGGS
TSYADALKGRITISRDNSKNTLSLQMNSLRAEDTAVYYCAI
>V91RF-JZKE01278605.1-ighv |(401, 710)|3.0|(1.000,1.000,1.000)|-1
VQCEVQLVESGGGLVQPGGSLTLSCAASGFTFSDYYMSWVRQAPGKGLEWVSRISSDGTS
TYYADAVKGRFTISRDNSKNTLSLQMNSLQAEDTAVYYCAR
>V92RF-JZKE01278607.1-ighv |(3705, 4014)|3.0|(1.000,1.000,1.000)|-1
VQCEVQLVESGGGLVQPGGSLTLSCAASGFSFSSYWMHWVRQAPGKGLEWVSYINSAGGS
TYYADAVKGRFTISRDNSKNTLSLQMNSLRAEDTAVYYCAR
>V93RF-JZKE01278609.1-ighv |(657, 966)|3.0|(1.000,1.000,1.000)|-1
VQCEVQLVESGGGLIQPGGSLTLSCAASGFSFSSYRMNWVRQAPGKGLEWISYISSGGGS
TYYADAVKGRFTISRDNSKNTLSLQMNSLRAEDTAVYYCAR
>V94RF-JZKE01278610.1-ighv |(3774, 4083)|3.0|(1.000,1.000,1.000)|-1
VQCEVQLVESGGGLVQPGGSLTLSCAASGFSFSSYDMSWVRQAPGKGLEWVSYINYGGGS
TSYADAVKGRFTISRDNSKNTLSLQMNSLRADDTAVYYCAS
>V95RF-JZKE01278610.1-ighv |(12525, 12834)|2.99798400013|(1.000,0.998,1.000)|-1
VHCEVQLVESGGGLVQPGGSLTLSCAASGFTVSSYCMSWVRQAPGKGLEWVSYIYSDGGS
RNYADAVKGRFTTSTDNGKNTLYLQMNSLRAEDTALYYCAR
>V96RF-JZKE01278611.1-ighv |(583, 892)|2.99899600001|(1.000,1.000,0.999)|-1
VQCEVQLVESGGGLVQPGGSLRLSCVASGFTFSDYYMSWVRQAPGKGLEWVLYIYSDDGD
TSYADAVKGRFTISTDNGKNMLYLQMNSLRAEDTAVYYCAR
>V97RF-JZKE01278611.1-ighv |(6883, 7192)|3.0|(1.000,1.000,1.000)|-1
VQCEVQLVESGGGLVQPGGSLKLSCAASGFTFSSYGMNWVRQTPGKGLEWISYINSAGGS
TSYADAVKGRFTISRDNSKNTLSLQMNSLRAEDTAVYYCAR
>V98RF-JZKE01278614.1-ighv |(2171, 2477)|3.0|(1.000,1.000,1.000)|-1
VQCEVQLVESGGGLVQPGGSLTLSCAVSGFTVSSYDMSWIRQASGKGLEWVSYISYGGST
YYADAVKGRFTISRDNGKNTLSLQMNSLRTEDTAVYYCAR
>V99RF-JZKE01294660.1-trbv |(1696, 1993)|2.87906698619|(0.936,0.974,0.984)|-1
PVEAQVTQTPRNRITETGKNVTVTCSQNMNHEYMSWYRQDPGLGLKLIYYSAKVEFVTKG
DAPDGYTASRREKPSFSLNVESTRTSQTALYLCASSL
>V100RF-JZKE01294666.1-trbv |(406, 706)|1.56640434039|(0.883,0.609,0.603)|-1
SVDTEVTQSPRYLVKGKEQKIKMDCVPKKGHIHVYWYRKKLEEELKFLVYLQNGDIIEKE
EIFNDLFSAQCPKNSPCSLEIQSIESGDAALYFCASSQ
>V101RF-JZKE01294668.1-trbv |(161, 463)|2.99180001921|(1.000,0.999,0.993)|-1
HTDAGITQNPRFRVTETGKQVTLRCHQTDKHDYMYWYRQDLGHGLRLIHYSIGAGNTEKG
QFSDGYSVSRSNEQNFSLTLESATPSQTSVYFCASSDST
>V102RF-JZKE01294668.1-trbv |(25796, 26084)|2.41617990178|(0.763,0.884,0.875)|-1
AMVMQNPRYQVTRVGKTVTLSCSQNMNHNTMYWYQQKLSQAPKLLFYYYEREFNNETDTS
DNFQPSRPDTSSSSLDIRSPGLGDSAMYLCATSR
>V103RF-JZKE01294668.1-trbv |(32591, 32891)|2.76024599033|(0.942,0.935,0.893)|-1
SSGEEVTQTPGHLLKGKGQKVKMYCVPIKGHRYVFWYQQILGKEFKFLFSFQDKEIFEET
EMLKQRFSAECPQNLPCSLEIQTAELQDSAVYLCASSE
>V104RF-JZKE01294668.1-trbv |(34381, 34677)|2.53584688362|(0.876,0.932,0.778)|-1
PAVSQTPSYQVTQMGQGVILRCDPISGHIFLYWYQQNHRQEMKFLLSFHYQNIAAESAMP
KERFSAERPNGTYSTLKIRPAEPGDSAVYLCASGSDT
>V105RF-JZKE01294669.1-trbv |(2779, 3079)|2.90118061787|(0.948,0.985,0.977)|-1
HMGAGVSQSPRHKITMRGQNVTLRCDPISGYTFLFWYQQTLGQGPQLLIYFQDKDVVDKS
KLTGDRISAERPEGSFSRLKIQPAEQGDSAVYLCASSL
>V106RF-JZKE01294669.1-trbv |(11432, 11727)|2.20143832862|(0.898,0.885,0.645)|-1
PTEAGVTQTPRHLIKARGQQVTLRCSPVSGHNRVYWYQQALGQGLQFLIQYYNGEEGEKG
NFPARFSGHQFSDYRSELNMSALELGDSALYLCASN
>V107RF-JZKE01294669.1-trbv |(21670, 21960)|2.98278801933|(0.996,0.989,0.998)|-1
DAGVIQSPRHLIKGKQETTILKCYPLSGHDTVYWYQQAPGQGLQFLISYYEKMQREKGNI
PQRFSGQQFADYHSELNLSSLEPGDSALYLCASSL
>V108RF-JZKE01294672.1-trbv |(4950, 5250)|2.84300135931|(0.945,0.935,0.965)|-1
HTGAGVSQSPRHKVTERGQNVSLRCDPISGHVSLFWYRQTPGQGLQLLIYFQGADATDKS
GLPSDRISAERPEGSFSTLKIQPAEQGDSAVYLCASSL
>V109RF-JZKE01294688.1-trbv |(5277, 5566)|1.96567706586|(0.684,0.738,0.590)|-1
EAGVTQTPRHLIKARGQQVTLRCSPVSGHASVYWYQQALGQGPQFLIQYYDGEEGEKGNF
PARFSGHQFSDYRSELNMSALELGDSALYLCDSS
>V110RF-JZKE01294690.1-trbv |(9942, 10239)|2.98698400013|(0.995,0.997,0.995)|-1
PLDTAVFQTPKYLVSQMGNNVSLKCKQTLGHNTMYWYKQDSEKLLKIMFAYNNKELILNE
TVSNRFSPASPDKAHLNLHIESPEPDDSAVYLCASSY
>V111RF-JZKE01294692.1-trbv |(174, 471)|3.0|(1.000,1.000,1.000)|-1
PVDTGITQTPRHLVMGMTDKKSLKCEQNLGHDAMYWYKQSAKKPPELMFYYNYQELRENL
TVSSRFSPECPDSSHLYLHLDALQPDDSAMYLCASSQ
>V112RF-JZKE01294699.1-trbv |(3116, 3413)|2.85082119202|(0.940,0.957,0.956)|-1
PMDTAVFQTPKYLLTETGNNVSLKCEQTLGNDAMYWYKQDSEKLLKIMFTYNNKELILNE
TVSNRFSPGSPDKAHLNLHIESPEAGDSAVYLCASSY
>V113RF-JZKE01294700.1-trbv |(9965, 10265)|2.80256985094|(0.937,0.906,0.967)|-1
HTEPGVIQTPTYQVIEKGQEVILRCDPISGHLYFYWYQQIWGQKVEFLVSFYNDNISEKS
KIFKDRFSLERPRGSYLALKIQSTEPEDSATYLCASSP
>V0RF-AACZ03015560.1-igkv |(51593, 51911)|2.91861812739|(0.996,0.938,0.998)|1
AYGDIVMTQSPDSLAVSLGGRATINCKSSQSILYSSNNKNYLAWYQQKPGQPPKLLIYWA
STRQSGVPDRFSGSGSGTDFTLTISSLQAEDVAVYYCQQHYSAP
>V1RF-AACZ03015560.1-igkv |(63266, 63554)|2.94836527997|(0.991,0.971,0.988)|1
TTLTQSPAFVSATPGDKVTISCKASQDIDDDMNWYQQKPGEAAIFIIQEATTLVSGIPPR
FSGSGYGTDFTLTINNIESEDAAYYFCLQDDNFP
>V2RF-AACZ03050973.1-trgv |(700, 1013)|2.82237486023|(0.998,0.993,0.883)|1
SQKSSNLEGRMKSVTRPTGSSAEITCDLIVINAVYIHWYLHQEGKSPQRLLYYDVSNSRD
VLESGLSLGKYYTHTPRRWSWILRLQNLIENDSGVYYCATWD
>V3RF-AACZ03050974.1-trav |(13446, 13755)|1.59647085523|(0.588,0.587,0.473)|1
RMKSVTRPTGSSAVITCDLPVENAGYTHWYLHQEGKAPQRLLYYDSYNSRVVLESGISQE
KYHTYASTGKSLKFILENLIERDSGVYYCATWDRHSDSDLC
>V4RF-AACZ03053974.1-trbv |(14398, 14698)|2.99174403277|(1.000,1.000,0.992)|1
LTEPEVTQTPSHQVTQMGQEVILRCVPISNHLYFYWYRQILGQKVEFLVSFYNNKISEKS
EIFDDQFSVERPDGSNFTLKIRSTKLEDSAMYFCASSE
>V5RF-AACZ03053974.1-trbv |(26630, 26943)|2.60986919643|(0.962,1.000,0.779)|1
PIDTEVTQTPKHLVMGMTNKKSLKCEQHMGHRAMYWYKQKAKKPPELMFVYSYKKLSINE
SVPSRFSPECPNSSLLNLHLHALQPEDLALYLCASSQDTALQ
>V6RF-AACZ03053974.1-trbv |(34490, 34786)|3.0|(1.000,1.000,1.000)|1
PVEAGVTQTPRYLIKARGQQVTLSCSPISGHRSVSWYQQTPGQGLQFLFEYFSETQRNKG
NFPGRFSGRQFSNSRSEMNVSTLELGDSALYLCASSL
>V7RF-AACZ03053974.1-trbv |(41734, 42031)|3.0|(1.000,1.000,1.000)|1
PVNAGVTQTPKFQVLKTGQSMTLQCAQDMNHNSMYWYRQDPGMGLRLIYYSVGEGTTDKG
EVPDGYNVSRLNKREFSLRLESAAPSQTSVYFCASSE
>V8RF-AACZ03053975.1-trbv |(1894, 2207)|2.96265347361|(1.000,1.000,0.967)|1
PMEMGVTQTPRHLVMGMTNKKSLKCEQHLGHNAMYWYKQSAKKPLELMFVYNFKEQTENN
SVPSRFSPECPNSSHLFLHLHALQPEDSALYLCASSQDTALQ
>V9RF-AACZ03053976.1-trbv |(3094, 3391)|2.9969280013|(0.997,1.000,1.000)|1
PVNAGVTQSPKFRVLKTGQSMTLQCAQDMNHNYMYWYQQDPGMGLRLIHYSAGEGTTAKG
EVPDGYNVSRLNTQNFLLRLESAAPSQTSVYFCATSE
>V10RF-AACZ03053977.1-trbv |(2980, 3277)|3.0|(1.000,1.000,1.000)|1
PLDTAVSQTPKYLVTQMGKKESLKCEQNLGHNAMYWYKQDSKKFLKTMFIYSNKEPILNE
TVPNRFSPDSPDKAHLNLHINSLELGDSAVYFCASSQ
>V11RF-AACZ03053977.1-trbv |(6432, 6729)|3.0|(1.000,1.000,1.000)|1
PMEMGVTQTPRHLVMGMTNKKSLKCEQHLGHNAMYWYKQSAKKPLELMFVYSLEERVENN
SVPSRFSPECPNSSHLFLHLHTLQPEDSALYLCASSQ
>V12RF-AACZ03053977.1-trbv |(14911, 15208)|2.99899600001|(1.000,0.999,1.000)|1
PVNAGVTQTPKFRVLKTGQSMSLLCAQDMNHEYMYWYRQDPGMGLRLIHYSVGEGTTAEG
EVPDGYNVSRLKKQNFLLGLESAAPSQTSVYFCASSY
>V13RF-AACZ03053979.1-trbv |(398, 698)|2.99798400013|(1.000,1.000,0.998)|1
HTGAGVSQSPSNKVTEKGKDVELRCDPISGHTALYWYRQSLGQGLEFLIYFQGNSAPDKS
GLPSDRFSAERTGGSVSTLTIQRTQQEDSAVYLCASSL
>V14RF-AACZ03053981.1-trbv |(4476, 4773)|3.0|(1.000,1.000,1.000)|1
PVIAGITQAPTSQILAAGRSMTLRCTQDMRHNAMYWYRQDLGLGLRLIHYSNTAGTTGKG
EVPDGYSVSRANTDDFPLTLASAVPSQTSVYFCASSD
>V15RF-AACZ03053981.1-trbv |(8075, 8375)|2.99696400065|(1.000,1.000,0.997)|1
HTGAGVSQTPSNKVTEKGKDVELRCDPISGHAALYWYRQSLGQGPEFLIYFQGTGAADDS
GLPNDRFFAVRPEGSVSTLKIQRTEQGDSAVYLCASSL
>V16RF-AACZ03053981.1-trbv |(12907, 13203)|2.82677464153|(0.979,0.933,0.932)|1
PVEAGVTQSPTHLIKTRGQQVTLRCSPISGHSSVSWYQQALGQGHQFISRYANELRRSEG
NFPNRFSGRQFHDYCSEMNVSALELGDSALYLCARSL
>V17RF-AACZ03053981.1-trbv |(15649, 15945)|2.99598000014|(0.999,0.997,1.000)|1
PVDSGVTQTPKHLITATGQQVTLRCSPRSGDLSVYWYQQSLDQGLQFLIQYYNGEESAKG
NILERFSAQQFPDLHSELNLSSLELGDSALYFCASSV
>V18RF-AACZ03053981.1-trbv |(23626, 23923)|2.18423072702|(0.922,0.610,0.997)|1
HRDAEITQSPRHKITETGRQVTLACHQTWNHNNMFWYRQDLGHGLRLIHYSYGVQDTNKG
EVSDGYSVSRSNTEDFPLTLESAASSQTSVYFCASSE
>V19RF-AACZ03053981.1-trbv |(31375, 31675)|2.99294800078|(0.998,1.000,0.995)|1
LSEAEVAQSPRYKITEKSQAVAFWCDPISGHATLYWYRQILGQGPELLVQFQDESVVDDS
QLPKDRFSAERLKGVDSILKIQPAELGDSAMYLCASSL
>V20RF-AACZ03053983.1-trbv |(4545, 4845)|2.97541612211|(0.994,0.999,0.983)|1
LTEAGVAQSPRYKIIEKRQSVAFWCNPISGHATLYWYQQILGQGPKLLIQFQNNGVVDDS
QLPKDRFSAERLKGVDSTLKIQPAKLEDSAMYLCASSL
>V21RF-AACZ03053983.1-trbv |(21546, 21843)|2.994900005|(1.000,1.000,0.995)|1
PVNAGVTQTPKFQVLKTGQSMTLQCAQDMNHKYMYWYRQDPGMGLRLIHYSVGAGITDKG
EVPNGYNVSRSNTEDFPLSLVSAAPSQTSVYFCASSY
>V22RF-AACZ03053983.1-trbv |(25762, 26062)|3.0|(1.000,1.000,1.000)|1
HTGAGVSQSPRYKVAKRGRDVALRCDSISGHVTLYWYRQTLGQGSEVLTYFRSDAQRDKS
GRPSGRFSAERPERSVSTLKIQRTEQGDSAVYLCASSL
>V23RF-AACZ03053983.1-trbv |(33686, 33982)|3.0|(1.000,1.000,1.000)|1
PVDAGVTQSPTHLIKTRGQQVTLRCSPQSGHNTVSWYQQALGQGPQFIFQYYREEENGRG
NFSPRFSGRQFPNYSSELNVNALELDDSALYLCASSL
>V24RF-AACZ03053983.1-trbv |(40132, 40429)|2.99596000066|(1.000,0.999,0.997)|1
PVNAGVTQTPKFRILKIGQSMTLQCAQDMNHNYMYWYRQDPGMGLKLIYYSVGAGITDKG
EVPNGYNVSRSTTEDFPLRLESAAPSLTSVYFCASSY
>V25RF-AACZ03053984.1-trbv |(12230, 12526)|2.99392000218|(0.996,1.000,0.998)|1
PVDAGVTQSPTHLIKTRGQQVTLRCSPISGHTSVSWYQQALGQGPQFIFQYYEKEERGRG
NFPDRFSACQFPNYSSELNVNALLLGDSALYLCASSL
>V26RF-AACZ03053986.1-trbv |(8, 308)|2.99899200002|(0.999,1.000,1.000)|1
HTGAGVSQSPRYKVTKRGQDVTLRCDPISGHVALYWYRQALGQGPEFLTYFNYEAQPDKS
GLPNDRFSAERPEGSNSTLTIQRTEQRDSAMYLCASSL
>V27RF-AACZ03053987.1-trbv |(5059, 5356)|2.97073242436|(0.999,0.988,0.985)|1
PMNAGVTQTPKFHILKTGQSMTLQCAQDMNHGYMSWYRQDPGMGLRLIYYSAAAGTTDKG
EVPNGYNVSRLNTEDFPLRLVSAAPSQTSVYFCASSY
>V28RF-AACZ03053988.1-trbv |(2703, 3003)|2.99798400013|(1.000,1.000,0.998)|1
HTGAGVSQSPRYKVTKRGQDVTLRCDPISSHATLYWYQQALGQGPEFLTYFNYEAQPDKS
GLPNDRFSAERPEGSNSTQTIQRTEQRDSAMYLCASSL
>V29RF-AACZ03053988.1-trbv |(11127, 11423)|3.0|(1.000,1.000,1.000)|1
PVDAGVTQSPTHLIKTRGQHVTLRCSPISGHTSVSWYQQALGQGPQFIFEYYEKEERGRG
NFPDRFSARQFPNYSSELNVNALLLGDSALYLCASSL
>V30RF-AACZ03053988.1-trbv |(18445, 18742)|2.99899600001|(1.000,0.999,1.000)|1
PVNAVVTQTPKFQVLKTGQSMTLQCAQDMNHDCMSWYRQDPGMGLRRIHYSVAAGITDKG
EVPDGYNVSRSNKEDLPLRLESAAPSQTSVYFCASSY
>V31RF-AACZ03053988.1-trbv |(23071, 23371)|3.0|(1.000,1.000,1.000)|1
HTGAGVSQSPRYKVTKRGQDVALRCDPISGHVSLFWYQQALGQGPEFLTYFRNEAQLDKS
GLPSDRFFAERPEGSVSTLKIQRTQQEDSAVYLCASSL
>V32RF-AACZ03053988.1-trbv |(31286, 31582)|3.0|(1.000,1.000,1.000)|1
PVEAGVTQSPTHLIKTRGQQVTLRCSPISGHTSVYWYQQALGLGLQFLLWYDEGEERNRG
NFPRRFSGRQFPNYSSELNVNALELEDSALYLCASSL
>V33RF-AACZ03053988.1-trbv |(40506, 40806)|2.994900005|(1.000,0.995,1.000)|1
HADTGVSQDPSHKITKRGQNVTFRCDPISEHNRLYWYRQTLGQCPEFLTYFQNEAQLEKS
RLLSDRFSAERPKGSFSTLEIQHTEQGDSAIYLCASSL
>V34RF-AACZ03053988.1-trbv |(47037, 47334)|3.0|(1.000,1.000,1.000)|1
SVAAGVIQSPRYLIKEKRETATLKCYPIPRHDTVYWYQQGPGQDPQFLISFYEKMQSDKG
SIPDRFSAQQFSDYHSELNMSSLELGDSALYFCASSS
>V35RF-AACZ03053988.1-trbv |(55269, 55566)|2.985900005|(0.997,0.997,0.992)|1
HMDAGITQSPRHKVTETGTPVTLRCHQTENHRYMYWYRQDPGHGLRLIHYSYDVKDTDKG
EVSDGYSVSRSKTEDFLLTLESTTSSQTSVYFCAISE
>V36RF-AACZ03053989.1-trbv |(6507, 6807)|2.95204798746|(0.996,0.961,1.000)|1
LIEAGVVQSPRYKIIEKKQPVAFWCNPISGHNTLYWYWQNLGQGPELLIRYENEEAVDDS
QLPKDRFSAERLKGVDSTLKIQPAELGDSAVYLCASSL
>V37RF-AACZ03053989.1-trbv |(12103, 12403)|3.0|(1.000,1.000,1.000)|1
HTDAGVIQSPRHEVTEMGQEVTLRCKPISGHNSLFWYRQTMMQGLELLIYFNNNVPIDDS
GMPKDRFSAKMPNASFSTLKIQPSEPRDSAVYFCASSL
>V38RF-AACZ03053991.1-trbv |(6886, 7186)|2.97007231762|(0.993,0.999,0.979)|1
LIDAGVTQTPRHKVTEMGQEVTMRCQPILGHNTVFWYRQTMMQGLELLAYFRNRAPLDDS
GMPKDRFSAEMLDATLATLKIQPSEPRDSAVYFCASGL
>V39RF-AACZ03053991.1-trbv |(13707, 14007)|2.98974003277|(0.999,0.991,1.000)|1
HIEAGVTQFPSHSVIEKGQTVTLRCDPVSGHDNLYWYRRVMGNEIKFLLHFVKESKQDES
GMPNNRFLAERTGGTYSTLKVQPAELEDSGVYFCASSQ
>V40RF-AACZ03053991.1-trbv |(18826, 19123)|2.98893600205|(0.995,0.995,0.999)|1
HGDAKVIQNPRYQVTQFEKPVTLGCSQNLNHNVMYWYQQKSSQAPKLLFHYYDKDFNNEA
DTPDNFQSRRPNTSFCFLDIRSPGLGDAAMYLCATSR
>V41RF-AACZ03053991.1-trbv |(23811, 24111)|2.99899600001|(1.000,1.000,0.999)|1
SPGEEVTQTPKHLVRGEGQKAKLYCAPIKGHSYVFWYQQVLKKEFKFLISFQNENVFDKT
GMPKERFSAKCLSNSPCSLEIQATKLEDSAVYFCASSQ
>V42RF-AACZ03053991.1-trbv |(41750, 42046)|2.95738267424|(0.999,0.965,0.998)|1
LSNAGVMQNPRHLVRRRGQEARLRCSPVKGHNHVYWYRQLPEEGLKFMVYLQKENIIDES
GMPKERFSAEFPKEGPSILRIQQAVRGDSAAYFCASS
>V43RF-AACZ03053991.1-trbv |(44878, 45175)|2.99093200206|(0.996,1.000,0.995)|1
TVDGGITQSPKYLFRKEGQNVTLNCEQNLNHDAMYWYRQDPGQGLRLIYYSQIVNDFQKG
DIAEGYSVSREKKESFPLTVTLAQKNPTAFYLCASSI
>V44RF-AACZ03053992.1-trbv |(7444, 7744)|2.96474839429|(0.997,0.985,0.984)|1
STDTKVTQRPRLLVKASEQKAKMDCVPIKGHSYVYWYRKKLEEELKFLIYFQNEELIQKA
EIINERFLAQCPKNSSCTLEIQSTESGDTALYFCASSK
>V45RF-AACZ03053992.1-trbv |(16518, 16818)|2.99899600001|(1.000,1.000,0.999)|1
SFHAKVTQTPGHLVKGKGQKTKMDCTPEKGHVFVYWYQQNQNKEFMLLISFQNEQVLQET
EMHKKRFSSQCPKNTPCSLAILSSEPGDTALYLCASSQ
>V46RF-AACZ03053992.1-trbv |(27256, 27554)|2.35410587611|(0.994,0.998,0.683)|1
SMDADVTQTPRNRITKTGKRIMLECSQTKGHDRMYWYRQDPGLGLRLIYYSFDVKDINKG
EISDGYSVSRQAQAKFSLSLESAIPNQTALYFCATSD
>V47RF-AACZ03053992.1-trbv |(41278, 41575)|2.99899600001|(1.000,0.999,1.000)|1
LMEADIYQTPRYLVIGTGKKIALECSQTMGHDKMYWYQQDPGMELHLIHYSYGVNSTEKG
DLSSESTVSRIRTEHFPLTLESARPSHTSQYLCASSE
>V48RF-AACZ03053994.1-trbv |(21067, 21364)|2.994900005|(1.000,1.000,0.995)|1
PLEAQVTQNPRYLITVTGKKLTVTCSQNMNHDYMSWYRQDPGLGLRQIYYSVNVEVIDKG
DVPEGYNVSRKEKRNFPLILESPSPNQTSLYFCASSL
>V49RF-AACZ03053994.1-trbv |(26364, 26661)|2.99798400013|(1.000,1.000,0.998)|1
LVDVKVTQSSRYLVKRMGEKVFLECVQDMDHENMFWYRQDPGLGLRLIYFSYDVKMKEKG
DIPEGYSVSREKKERFSLILESASTNQTSMYLCASSL
>V50RF-AACZ03053995.1-trbv |(9498, 9801)|2.9428984707|(0.995,0.956,0.998)|1
SVFSAVISQKPSRDICQRGTSLTIQCQVNSQVTMMFWYRQQPGQSPTLIATANQGSEATY
ETGFVIDKFPISRPNLTFSTLTVSNMSPEDSSIYLCSVE
>V51RF-AACZ03066999.1-trbv |(221141, 221441)|2.94630491943|(0.992,0.982,0.974)|1
SMDTKVTQRPRLLVKANEQKAKTDCVPIKRHSYVYWYHKTLEEELKFLIYFQNEEIIQKA
EIINERFSAQCPQNSPCTLEIQSTESGDTAWYFCANSK
>V52RF-AACZ03066999.1-trbv |(230067, 230355)|1.60496782636|(0.586,0.525,0.524)|1
CFHAKVTQTPGYLVKGKGRKTKMYYTPENRHTFVCWYQQNQNKEFMFLISFQNEQVLQEM
EMHKKRFSSQCPKNPPCSLAILSSEPGDTALYLC
>V53RF-AACZ03067000.1-trbv |(17891, 18182)|3.0|(1.000,1.000,1.000)|1
LMEAEIYQTPRHRVIGTGKKITLECSQTMGHDKMYWSRSRNGITPHPPFLWVNSTEKGDL
SSESTVSRIRIERFPLTLESASPSHTSQYLCASSE
>V54RF-AACZ03067007.1-trbv |(7737, 8040)|2.99799600001|(0.999,0.999,1.000)|1
SVFSAVISQKPSRDICQRGTSMTIQCQVDSQVTMMFWYCQQPGQSMTLIATANQGSEATY
ESRFVIDKFPISRPNLTFSTLTVSNRRPEDSSIYLCSVE
>V55RF-AACZ03070936.1-igkv |(7433, 7733)|3.0|(1.000,1.000,1.000)|1
ARCDIQMTQSPSSLSASVGGRVTITCRASQGISNNLNWYQQKPGKTPKLLIYAASSLQSG
IPSRFSDSGSGTDYTLTISSLQPEDFATYYCQQSDSTP
>V56RF-AACZ03095312.1-trav |(40528, 40815)|2.99496000066|(0.997,0.998,1.000)|1
VRSQQPVQSPQAVILREGEDAVINCSSSKALYSVHWYRQKHGEAPVFLMMLLKGGEQKGH
DKISASFNEKKQQSSLYLMASQLSYSGTYFCGAE
>V57RF-AACZ03095314.1-trav |(457, 747)|3.0|(1.000,1.000,1.000)|1
VSSEDKVVQSPLSLVVHEGDTVTLNCSYEVTNFQSLLWYKQEKKAPTFLFMLTSSGIEKK
SGRLSSILDKKELFSILNITATQTGDSAIYLCAVE
>V58RF-AACZ03095317.1-trdv |(27773, 28074)|2.92122621922|(0.999,0.999,0.938)|1
SGMAQTVTQSQPEMSVQEAETVTLSCTYDTSESNYYLFWYKQPPSRQMILVIRQEAYKQQ
NATENRFSVNFQKAAKSFSLKISDSQLGDTAMYFCAFM
>V59RF-AACZ03095317.1-trav |(36941, 37243)|2.99798400013|(1.000,0.998,1.000)|1
FSMAQTVTQTQPEMSVQEAETVTLSCTYDTSESDYYLFWYKQPPSRQMILVIRQEAYKQQ
NATENRFSVNFQKAAKSFSLKISDSQLGDAAMYFCAYRS
>V60RF-AACZ03095319.1-trav |(17030, 17318)|2.99899600001|(1.000,0.999,1.000)|1
LSGELKVEQNPLFLSTQEGKNYTIYCNYSTTSDRLYWYRQDPGKSLESLFVLLSNGAVKQ
EGQLMASLDTKARLSTLHITAAVHDLSATYFCAV
>V61RF-AACZ03095319.1-trav |(33732, 34018)|1.68622761649|(0.575,0.527,0.595)|1
VSAARNEVEQSPQDLTAQEGELITINCSYSVGINALHWLQQHPGGGIVSLFMLSSGKKKH
GRLIATINIQEKHSSLHITASHPRDSAIYICAV
>V62RF-AACZ03097606.1-trav |(3590, 3899)|2.20074349607|(0.880,0.914,0.631)|1
TIMYLVIGTAGQSLEQPSEVTAVEGAIVQINCTYQTSGFYGLSWYQQHDGGAPTFLSYNA
LDGLEETGHFSSFLSRSDSYGYLLLQKLQMKDSASYFCAVR
>V63RF-AACZ03097611.1-trav |(13712, 14009)|2.59017965917|(0.992,0.773,1.000)|1
GLRAQSVAQPEDQVKVAEGNPLTVKCTYSVSGNPYLFWYVQYPNRGLQFLLKYITGDNLV
KGSYGFEAEFNKSQTSFHLKKPSALVSDSALYFCAVR
>V64RF-AACZ03097612.1-trav |(9441, 9731)|3.0|(1.000,1.000,1.000)|1
MSRGEDVEQSLFLSVREGDSSVINCTYTDSSSTYLYWYKQEPGAGLQLLTYIFSNMDMKQ
DQRLTVLLNKKDKHLSLRIADTQTGDSAIYFCAES
>V65RF-AACZ03097613.1-trav |(2901, 3189)|3.0|(1.000,1.000,1.000)|1
VKSQKIEQNSEALNIQEGKTATLTCNYTNYSPAYLQWYRQDPGRGPVFLLLIRENEKEKR
KERLKVTFDTTLKQGVFHITASQPADSATYLCAL
>V66RF-AACZ03097613.1-trav |(17275, 17562)|3.0|(1.000,1.000,1.000)|1
ANGENQVEHSPHFLGPQQGDVASMSCTYSVSRFNNLQWYRQNTGMGPKHLLSMYSAGYEK
QKGRLNATLLKNGSSLYITAVQPEDSATYFCAVD
>V67RF-AACZ03097613.1-trav |(45730, 46024)|3.0|(1.000,1.000,1.000)|1
GINGDSVVQTEGQVLLSEGDSLIVNCSYETTQYPSLLWYVQYPGEGPQLLLKAMKANDNG
RNKGFEATYRKETTSFHLEKDSVQESDSAVYFCALS
>V68RF-AACZ03097613.1-trav |(59820, 60113)|3.0|(1.000,1.000,1.000)|1
GSGKNQVEQSPQSLIILEGKNCTLQCNYTVSPFNNLRWYKQDTGRGPVSLTIMTFSENTK
SNGRYTATLDADTKQSSLHITASQLSDSASYICVVS
>V69RF-AACZ03097613.1-trav |(75553, 75841)|3.0|(1.000,1.000,1.000)|1
VWSQRKEVEQDPGPFNVPEGATVAFNCTYSNSASQSFFWYRQDCRKEPKLLMSVYSSGNE
DGRFTAQLNRASQYISLLIRDSKLSDSATYLCAV
>V70RF-AACZ03097613.1-trav |(86767, 87064)|2.99799200002|(1.000,0.999,0.999)|1
TVRAQSVTQPDIHITVSEGASLELRCNYSYGATPSLFWYVQSPGQGLQLLLKYFSGDTLV
QGIKGFEAEFKRSQSSFNLRKPSVHWSDAAEYFCAVG
>V71RF-AACZ03097614.1-trav |(12294, 12584)|2.99899600001|(1.000,1.000,0.999)|1
VNGENVEQHPSTLSVQEGDGAVIKCTYSDSASNYFPWYKQELGKGPQLIIDIHSNMGEKK
DQRIAVTLNKTAKHFSLHITETQPEDSAVYFCAAS
>V72RF-AACZ03097614.1-trav |(31772, 32063)|2.99493200206|(1.000,0.996,0.999)|1
VWSQQKEVEQNSGPLSVPEGAIVSLNCTYSDRRSQSFFWYRQYSGKSPELIMSIYSNGDE
EDGKFTAQLNKASQYVSLLIRDSQPSDSATYLCAV
>V73RF-AACZ03097614.1-trav |(38270, 38567)|3.0|(1.000,1.000,1.000)|1
GTRAQSATQLDSHVSVSEGALVLLRCNYSSSVPPYLFWYVQYPNQGLQLLLKYTTGATLV
KGINGFEAEFKKSETSFHLTKPSAHVNDAAEYFCAVS
>V74RF-AACZ03097618.1-trav |(4827, 5130)|3.0|(1.000,1.000,1.000)|1
PGIAQKITQTQPGMFVQEKEAVTLDCTYDTSDQSYGLFWYKQPSSGEMIFLIYQGSYDQQ
NATEGRYSLNFQKARKSANLVISASQLGDSAMYFCAMKE
>V75RF-AACZ03097618.1-trav |(21644, 21938)|3.0|(1.000,1.000,1.000)|1
RTRGDSVTQMEGPVTLSEEAFLTINCTYTATGYPSLFWYVQYPGEGLQLLLKATKADDKG
SNKGFEATYRKETTSFHLEKDSVQASDSAVYFCALS
>V76RF-AACZ03097619.1-trav |(24003, 24296)|3.0|(1.000,1.000,1.000)|1
VWSQQKEVEQDPGPLSVPEGAIASLNCTYSNSAFQYFMWYRQYSRKGPELLMYTYSSDNK
EDGRFTAQVDKSSKYISLFIRDSQPSDSATYLCAMS
>V77RF-AACZ03097619.1-trav |(56042, 56329)|3.0|(1.000,1.000,1.000)|1
VNSQQGEEDPQALSIQEGENAIMNCSYKTSINNLQWYRQNSGRGLVHLILIRSNEREKHS
GRLRVTLDTSKKSSSLLITASRAADTASYFCATD
>V78RF-AACZ03097619.1-trdv |(66115, 66418)|3.0|(1.000,1.000,1.000)|1
SSMAQKVTQAQTEISVVEKEDVTLDCVYETRDTTYYLFWYKQPPSGELVFLIRRNSFDEQ
NEISGRYSWNFQKSTSSFNFTITASQVVDSAVYFCALSE
>V79RF-AACZ03097619.1-trav |(99749, 100036)|2.99696400065|(1.000,1.000,0.997)|1
LSGEDQVTQSPEALRLQEGESSSLNCSYTVSGLRGLFWYRQDPGKGPEFLFALYSAGEEK
EKERLKATLTKKESFLHITAPKPEDSATYLCAVQ
>V80RF-AACZ03097619.1-trav |(111650, 111949)|2.72150309321|(0.977,0.833,0.992)|1
VSSKQEVTQIPAALSVPEGDNLVLNCSFTDSAIYNLQWFRQDPGKGLTSLLLIQSSQREQ
TSGRLNASLDKSSGRSTLYIAASQPGDSATYLCAVRHS
>V81RF-AACZ03097622.1-trdv |(8097, 8397)|2.99194800078|(0.999,0.997,0.996)|1
SSVAQKVTQAQSSVSMPVRKAVTLNCLYEASWWSYYIFWYKQLPSKEMVFLIRQGSGEQN
AKSGRYSVNFKKAAKSVALTISALQLEDSAKYFCAFWE
>V82RF-AACZ03097622.1-trav |(17372, 17662)|2.7696729805|(0.993,0.856,0.993)|1
VSSILNVEQSPQSLHVQEGDSTNFTCSFTSSNFYALHWYRWETAKSPEALFVMTLNGDEK
KKGRISATLNTKEGYSYLYIKGSQPEDSATYLCAF
>V83RF-AACZ03097624.1-trav |(2805, 3104)|2.97439727933|(0.999,0.998,0.979)|1
VNGQQVMQIPQYQHVQEGEDFTTYCNSSTTLSNIQWYKQRPGGHPVFLIQLVKSGEVKKQ
KRLTFQFGEAKKNSSLHITATQTTDVGTYFCAGHSAPQ
>V84RF-AACZ03097624.1-trav |(14019, 14309)|2.85093470935|(0.988,0.897,0.999)|1
TIIDAKTTQPTSMDCAEGRAANLPCNHSTISGNEYIHWYRQIHSQGPQYIIHGLKNNETN
EMASLIITEDRKSSTLILPHATLRDTAVYYCIVRV
>V85RF-AACZ03097899.1-ighv |(18928, 19237)|2.99899600001|(1.000,0.999,1.000)|1
TYSQVQLVQSGHEVKQPGASVKVSCKASGYSFTTYGMNWVRQAPGQGLEWMGWFNTYTGN
PTYAQGFTGRFVFSMDTSVSTAYLQISSLKAEDTAMYYCAR
>V86RF-AACZ03097899.1-ighv |(75199, 75508)|3.0|(1.000,1.000,1.000)|1
VQCEVQLLESGGGLVQPGGSLRLSCAASGFTFSSYWMHWVRQAPGKGLEWVSRINSDGSS
TSYADSVKGRFTISRDNAKNTLYLQMNSLRAEDTAVYYCTR
>V87RF-AACZ03097899.1-ighv |(83090, 83405)|3.0|(1.000,1.000,1.000)|1
VQCEVQLVESGGGLVQPGGSLRLSCAASGFTFSGSAMHWVRQASGKGLEWVGRIRSKANS
YATAYAASVKGRFTISRDDSKNTAYLQMNSLKTEDTAVYYCAR
>V88RF-AACZ03097900.1-ighv |(7950, 8265)|2.99899600001|(1.000,1.000,0.999)|1
VQCEVQLLESGGGLVQPGGSLRLSCAASGFTFSDYYMDWVRQAPGKGLEWVGRIRNKANS
YTTEYAASVKGRFTISRDDSKNSLYLQRNSLKTEDTAVYYCTR
>V89RF-AACZ03097900.1-ighv |(23404, 23719)|2.99796800026|(0.998,1.000,1.000)|1
VQCEVQLVESRGGLVQPGGSLRLSCAVSGFTFSDYYMSWVRQAPGKGLEWVGFIRNKANG
GTTEYTTSVKGRFTISRDDSKSITYLQMNSLKTEDTAVYYCSR
>V90RF-AACZ03097900.1-ighv |(27981, 28295)|2.88323004247|(0.998,0.932,0.973)|1
VLSQVTLKESGPALVKPTETLTLTCTFSGFSLSTSGMRVSWIRQPPGKALEWLARIDWDD
DKYYSTSLKTRLTISKDTSKNQVVLTMTNMDPVDTATYYCARI
>V91RF-AACZ03097900.1-ighv |(37008, 37317)|2.99180001921|(1.000,0.999,0.993)|1
VQSQVQLVQSGAEVKKPGSSVKVSCKVSGGTFSSYAISWVRQAPGQGLEWMGVIIPILGT
ANYAQKFQGRVTITADESTSTAYMELSSLRSEDTAVYYCAT
>V92RF-AACZ03097900.1-ighv |(75733, 76039)|3.0|(1.000,1.000,1.000)|1
VQCEVQLVESGGGLVQPGGSLRLSCAASGFTFSSYHMSWVRQAPGKGLEWVSVIYSGGST
YYADSVKGRFTISRDNSKNTLYLQMNSLRAEDTAVYYCAR
>V93RF-AACZ03097900.1-ighv |(92730, 93036)|3.0|(1.000,1.000,1.000)|1
VQCEVQLVESGGGLVQPGGSLRLSCAASGFTFSSYAMHWVRQAPGKGLEWVSLIYSGDST
YYADSVKGRFTISRDNSKNTLYLQMGSLRAEDTAVYYCAR
>V94RF-AACZ03097904.1-ighv |(3428, 3734)|3.0|(1.000,1.000,1.000)|1
VLSQLQLQESGPGLVKPSETLSLTCTVSGGSISSYYWSWIRQPPGKGLEWIGYIYYSGSA
YYNPSLKSRVTISVDTSKNQFSLKLSSVTAADTAVYYCAR
>V95RF-AACZ03097905.1-ighv |(2226, 2538)|2.96886891211|(1.000,0.972,1.000)|1
VLSQLQLQESGPGLVKPSQTLSLTCTVSGGSISSGSYYWSWIRQPAGKGLEWIGNIYYSG
STYYNPSLKSRVTISVDTSKNQFSLKLSSVTAADTAVYYCAR
>V96RF-AACZ03097906.1-ighv |(13610, 13916)|3.0|(1.000,1.000,1.000)|1
VQCEVQLVESGGGLVQPGGSLRLSCAASGFTVSSYHMSWVRQAPGKGLEWVSVIYSGGST
YYADSVKGRFTISRDNSKNTLYLQMNSLRAEDTAVYYCAR
>V97RF-AACZ03097906.1-ighv |(27525, 27832)|2.97754104219|(1.000,0.998,0.981)|1
VCAEVQLVQSGAEVKKPGESLKISCKGSGYSFTSYWIGWVRQMPGKGLEWMGIIYPGDSD
TRYSPSFQGQVTISADKSISTAYLQWSSLKASDTAMYYCA
>V98RF-AACZ03097906.1-ighv |(49257, 49572)|3.0|(1.000,1.000,1.000)|1
VQCEVQLVESGGGLVQPGRSLRLSCTASGFTFGDYAMSWIRQAPGKGLEWVGFIRSKAYG
GTTEYAASVKGRFTISRDDSKSIAYLQMNGLKTEDTAVYYCTR
>V99RF-AACZ03097906.1-ighv |(64529, 64835)|2.15798445271|(0.993,0.610,0.999)|1
VQCEDQLVESGGGLVQPGGSLRPSCAASGFAFSSYVLHWVRRAPGKGLEWVSAIGTGGDT
YYADSVMGRFTISRDNAKKSLYLQMNSLIAEDMAVYYCAR
>V100RF-AACZ03097906.1-ighv |(72260, 72569)|3.0|(1.000,1.000,1.000)|1
AHSQVQLVQSGAEVKKPGASVKVSCKASGYTFTSYTISWLRQAPGQGLEWMGVISPSDGS
TSYAQKFQGRVTMTRDTSTSTVYMELSSLRSEDTAVYYCAR
>V101RF-AACZ03097906.1-ighv |(76385, 76694)|3.0|(1.000,1.000,1.000)|1
AYSQMQLVQSGAEVKKPGSSVKVSCKASGYTFTYRYLHWVRQAPGQALEWMGWITPYNGN
TNYAQKFQDRVTITRDRSMSTAYMELRSLRSEDSAVYYCAR
>V102RF-AACZ03097910.1-ighv |(1033, 1344)|3.0|(1.000,1.000,1.000)|1
VQCEVQLVESGGGVVQPGGSLRLSCAASGFTFDDYAMHWVRQAPGKGLEWVSLISWDGGS
TYYADSVKGRFTISRDNSKNSLYLQMNSLRAEDTALYYCAKD
>V103RF-AACZ03097912.1-ighv |(17400, 17707)|2.98421230726|(1.000,0.999,0.986)|1
VQCEVQLVESGGGLVQPESSLKLSCAASGFTFSSYAMNWVRQAPGKGLEWVAHIWNDGSQ
KYYADSVKGRFTISRDNSKSMLYLQMDSLKAEDTAMYYCT
>V104RF-AACZ03097916.1-ighv |(3845, 4154)|3.0|(1.000,1.000,1.000)|1
VLSQVQLQESGPGLVKPSETLSLTCAVSGYSISSGYYWGWIRQPPGKGLEWIGSIYHSGS
TYYNPSLKSRVTISVDTSKNQFSLKLSSVTAADTAVYYCAR
>V105RF-AACZ03097919.1-ighv |(14915, 15224)|2.9689000027|(0.990,0.993,0.986)|1
VQCEVQLVESGGGLVQPGGSLRLSCAASGFTFSNSDTNWVHQAPGKGLELVSGVSWNGSR
MHYADSVKGRFIISRDNSRNSLYLQTNSLRAEDTAVYYCVR
>V106RF-AACZ03098145.1-ighv |(4162, 4471)|2.99796800026|(0.998,1.000,1.000)|1
VQCQVQLVESGGGVVQPGRSLRLSCAASGFTFSSYGMHWVRQAPGKGLEWVAFISYDGSN
KHYADSVRGRFTISRDNSKNTLYLQMNRLRAEDTAVYYCAR
>V107RF-AACZ03098146.1-ighv |(6178, 6490)|2.93623828262|(1.000,0.948,0.999)|1
VLSQVQLQESGPGLVKPSQTLSLTCAVSGGSITSGYYYWSWIRQPPGKGLEWIGGIYTSG
STYYNPSLKSRVTISVDTSKNQFSLKLSSVTAADTAVYYCAR
>V108RF-AACZ03098148.1-ighv |(5185, 5491)|2.30684234393|(0.942,0.871,0.709)|1
VLSQVQLQQWGAGLVKPSETLSLTCAVYGGSFSDYYWGWVRQPPGKGLEWIGHINYGGST
NYNPSLKSRVTISVDKSKNQFSLKLSSVTAADTAVYYCAR
>V109RF-AACZ03098176.1-ighv |(689, 998)|2.9918720041|(1.000,0.996,0.996)|1
VQCQVRLVESGGGVVQPGRSLRLSCAASGFTFSSYGMHWVRQAPGKGLEWVAFIQYDGSN
KYYADSVKGRFTISKDNSKNTLYLQMNSLRAEDTAVYYCAR
>V110RF-AACZ03102011.1-ighv |(12521, 12836)|2.88008905658|(0.992,1.000,0.913)|1
VQCEVQLVESGGGLVQPGGSLRLSCAASGFTFSDHYMSWVRQAQGKGLELVGLIRNKANS
YTTEYAASVKGRFTISREDLKNTLYLQMSSPKTEDLAVYYCAR
>V111RF-AACZ03102011.1-ighv |(35465, 35774)|2.82742974105|(0.984,0.966,0.904)|1
AQSRVQLVQSGAEVKKPGASVKVSCKASGYTFTSYCMHWVRQAHAQGLEWMGLVCPSDGS
TSHAQKFQGRVTITRDTSMSTAYMELSSLRSEDMAMYYCVR
>V112RF-AACZ03106490.1-ighv |(5495, 5804)|3.0|(1.000,1.000,1.000)|1
VQCEVQLVESGGGLVQPGGSLRLSCAASGFTFSSYWMHWVRQAPGKGLVWVSRINSDGSS
TSYADSLKGQFTISRDNAKNTLYLQMNSLRAEDMAVYYCTR
>V113RF-AACZ03107095.1-ighv |(2793, 3107)|2.94523565456|(0.990,0.964,0.994)|1
VLSQVTLKESGPALVKPTETLTLTCTLSGFSLSTSGMGMSWIRQPPGKALEWLAHIFSND
KKSYSTSLKNRLIISKDTSKSQVVLTMTNMDPVDTATYYCAWR
>V114RF-AACZ03126842.1-igkv |(17937, 18255)|2.96945704707|(0.995,0.976,1.000)|1
SSGDIVMTQTPLSLPVTPGEPASISCRSSESLLDTDDEHTYLNWYLQKPGQSPQLLIYEV
SNRASGVPDRFSGSGSGTDFTLKISRVEAEDVGVYYCMQALQTP
>V115RF-AACZ03126842.1-igkv |(27906, 28206)|2.99593600205|(1.000,1.000,0.996)|1
ARCDIQMTQSPSSLSASVGDRVTITCRASQGISNNLNWYQQKPGKTPKLLIYAASSLQSG
IPFRFSDSGSGTDYTLTISSLQPEDFATYYCQQSDSTP
>V116RF-AACZ03127129.1-iglv |(13910, 14207)|3.0|(1.000,1.000,1.000)|1
SVASYELTQPSSVSVSPGQTARITCSGDVLAKNYARWFQQKPGQAPVLVIYKDSERPSGI
PERFSGSSSGTTVTLTISGAQVEDEADYYCYSAADNN
>V117RF-AACZ03127129.1-iglv |(32581, 32884)|2.99899200002|(0.999,1.000,1.000)|1
SEASYELTQPPSVSVSPGQTARITCSGDALPKQYAYWYQQKPGQAPVLVIYKDSERPSGI
PERFSGSSSGTTVTLTISGVQAEDEADYYCQSADSSGTY
>V118RF-AACZ03127131.1-iglv |(7169, 7472)|2.99798400013|(1.000,0.998,1.000)|1
SVTSYELTQPPSVSVAPGQTARITCGGNNIGSKAVHWYQQKPGQAPVLVIYYDSDRPSGI
PERFSGSNSGNTATLTISRVEAGDEADYYCQVWDSSSKH
>V119RF-AACZ03127131.1-iglv |(15097, 15400)|3.0|(1.000,1.000,1.000)|1
SVVSSELTQDPAVSVALGQTVRITCQGDSLRSYYASWYQQKPGQAPVLVIYGNNNRPSGI
PDRFSGSSSGNTASLTITGAQAEDEADYYCSSLDSSGNH
>V120RF-AACZ03127135.1-iglv |(12358, 12661)|2.99593600205|(1.000,0.996,1.000)|1
SEASYELTQPPSVSVSLGQTARITCSGEALPKKYAYWYQQKPGQAPVLVIYKDSERPSGI
PERFSGSSSGTIVTLTISGVQAEDEADYYCQSADSSGTY
>V121RF-AACZ03127138.1-iglv |(6948, 7251)|2.16019253484|(0.915,0.996,0.601)|1
SATSYELTQPHSVSVATAQTARITCGGNNIGSKAVHWYQQKPGQDPVLVIYSNSNQPSGI
PERFSGSNPGNTATLTISRVEAGDEVDYYCQVWDSSSDH
>V122RF-AACZ03127139.1-iglv |(1837, 2140)|2.90522628274|(0.990,0.988,0.938)|1
SATSYELTQPHSVSVATAQMARITCGGNNIGSKAVHWYQQKPGQDPVLVIYSDSNRPSGI
PERFSGSNSGNTATLTISRVEAGDEVDYYCQVWDSSSDH
>V123RF-AACZ03127139.1-iglv |(22125, 22435)|2.96687023728|(0.998,0.996,0.975)|1
SWAQSALTQPPSVSRSPGQSVTISCTGTSSDVGGYNYVSWYQQHPGKAPKLMIYDVSKRP
SGVPDRFSGSKSGNTASLTISGLQAEDEADYYCCSYAGSYS
>V124RF-AACZ03127139.1-iglv |(41415, 41718)|3.0|(1.000,1.000,1.000)|1
SEASYELTQPPSVSVSPGQTARITCSGDALPKQYAYWYQQKSGQAPVLIIYEDSKRPSGI
PERFSGSSSGTMATLTISGAQVEDEADYYCYSTDSSGNH
>V125RF-AACZ03127139.1-iglv |(52418, 52728)|2.80265900353|(1.000,1.000,0.869)|1
SWAQSALTQPPSASGSPGQSVTISCTGTSSDIGGYNYVSWYQQHPGKAPKLMIYEVSKRP
SGVPDRFSGSKSGNTASLTVSRLQAEDEADYYCSSYAGSNN
>V126RF-AACZ03127142.1-iglv |(7297, 7595)|1.86041792097|(0.685,0.563,0.671)|1
LCALPVLTQPPSASASLGASVKLTCTLSSEHSTYTIEWYQQRPGRSPQYIMKVKSDGSHS
KGDGIPDRFMGSSSGADRYLTISNLQSDDEAEYHCGE
>V127RF-AACZ03127143.1-iglv |(3944, 4240)|2.99899600001|(1.000,0.999,1.000)|1
SVASYELTQPPSVSVSPGQTASITCSGDKLGDKYAYWYQQKSGQSPVLVIYQDSKRPSGI
PERFSGSNSGNTATLTISGTQAMDEADYYCQAWDSST
>V128RF-AACZ03151853.1-igkv |(10232, 10550)|2.92679088874|(0.996,0.943,0.999)|1
TSGDIVMTQTPLSLPVTPGEPASISCRSSQSLLDSDDGNTYLDWFLQKPEQSPQLLIYEV
SNWASGVPDRFSGSGSGTDFTLKISRVEAEDVGVYYCMQALQTP
>V129RF-AACZ03151853.1-igkv |(38017, 38335)|1.75479258497|(0.878,0.613,0.669)|1
SSEDIVMTQTPLSLPVTPGEQASISCRSCQSLLDSDDGNTYLDLYLQKPGQSPQLLIYTL
SYRASGVSDRFSGRGSGNDFTLKISRVEAEDVEVYYCMQHIEFP
>V130RF-AACZ03151853.1-igkv |(48491, 48784)|3.0|(1.000,1.000,1.000)|1
ARCDIQMTQSPSSLSASVGDRVTITCRASQSISNYLSWYQQKPGKAPKLLIYDASTLQSG
VPSRFSGSGSGTDFTLTISSLQPEDFATYYCQRGYG
>V131RF-AACZ03151853.1-igkv |(70778, 71078)|2.99696400065|(1.000,0.997,1.000)|1
ARCDIQLTQSPSSLSASVGDRVTITCQASQDISNYLNWYQQKPGKVPKLLIYSASNLQSG
VPSRFSGSGSGTDFTLTISSLQPEDVATYYCQRTYNAP
>V132RF-AACZ03151853.1-igkv |(99987, 100287)|2.85388365583|(0.970,0.999,0.905)|1
ARCDIQMTQSPSSLSASVGDRVTITCQASQDISNYLNWYQQKPGKAPKLLIYDASNLETG
VPSRFSGSGSGTDFTFTISSLQPEDIATYYYQQYDNLP
>V133RF-AACZ03151853.1-igkv |(122999, 123314)|2.98348007169|(1.000,0.991,0.993)|1
SSGDVVMTQSPLSLPVTLGQPASISCRSSQSLVYSDGNTYLSWIQQRPGQPPRLLIYKVS
NRDSGVPDRFSGSGAGTDFTLKISRVEAEDVGVYYCVQGIQLP
>V134RF-AACZ03151853.1-igkv |(133574, 133889)|3.0|(1.000,1.000,1.000)|1
SSADIVMTQTPLSLSVTPGQPASISCKSSQSLLHSDGNTYLYWYLQKPGQSPQLLIYRVS
NRASGVPDRFSGSGSGTDFTLKISQVEAEDVGVYYCMQGIQLP
>V135RF-AACZ03151853.1-igkv |(146050, 146365)|2.99798400013|(1.000,0.998,1.000)|1
SSGDIVMTQSPLSLPVTPGEPASISCRSSQSLLHSNRYNYLDWYLQKPGQSPQLLIYLGS
NRASGVPDRFSGSGSGTDFTLKISRVEAEDVGVYYCMQALQTP
>V136RF-AACZ03151853.1-igkv |(154335, 154635)|2.994900005|(1.000,0.995,1.000)|1
TRCDIQMTQSPSSLSASVGDRVTITCWASQGISNYLAWYQQKPGKVPKLLIYAASTLQSG
VPSRFSGSGSGTDFTLTISSLQPEDVATYYCQKYNSAP
>V137RF-AACZ03151853.1-igkv |(190625, 190927)|3.0|(1.000,1.000,1.000)|1
SSGDIVMTQTPLSSPVTLGQPASISCRSSQSLVHSDGNTYLSWLQQRPGQPPRLLIYKVS
NRFSGVPDRFSGSGAGTDFTLKISRVEAEDVGVYYCTQA
>V138RF-AACZ03151853.1-igkv |(207246, 207544)|2.62968474289|(1.000,0.791,0.999)|1
SRGEIVLTQSPDFQSVPPKEKVTITCRASQSIGSSLHWYQQKPGQSPKLLIKYASQSISG
VPSRFSGSGSGTDFTLTINSLEAEDAATYYCQQSSSL
>V139RF-AACZ03151855.1-igkv |(12698, 12994)|3.0|(1.000,1.000,1.000)|1
TTGEIVLTQSSATLSLSPGERATLSCRASQSVSSSYLAWYQQKPGQAPRLLIYDASSRAT
GIPDRFSGSGSGTDFTLTISRLEPEDFAVYYCQQYGS
>V140RF-AACZ03151855.1-igkv |(28194, 28494)|3.0|(1.000,1.000,1.000)|1
ARCDIQMTQSPSSLSASVGDRVTITCRASQGISNYLAWFQQKPGKAPKRLIYAASSLQSG
VPSRFSGSGSGTEFTLTISSLQPEDFATYYCLQHNSYP
>V141RF-AACZ03151855.1-igkv |(45639, 45939)|3.0|(1.000,1.000,1.000)|1
ARCDIQMTQSPSSLSASVGDRVTITCRASQGISSWLAWYQQKPGKAPKPLIYAASSLQSG
VPSRFSGSGSGTEFTLTISSLQPEDFATYYCQQYNSYP
>V142RF-AACZ03151855.1-igkv |(60285, 60585)|2.96672055687|(0.992,1.000,0.976)|1
TTGEIVLTQSPATLSLSPGERATLSCRASQSVSSYLAWYQQKPGQAPRLLIYGASNRATG
IPARFSGSGSRTDFTLTISSVEPEDFAVYYCQQYNNQP
>V143RF-AACZ03151857.1-igkv |(4301, 4601)|3.0|(1.000,1.000,1.000)|1
ARCAIQLTQSPSSLSASVGDRVTITCRASQGISNRLNWYQQKPGKAPKLLIYDASSLESG
VPSRFSGSGSGTDFTLTISSLQPEDFATYYCQQFNSYP
>V144RF-AACZ03151857.1-igkv |(10072, 10372)|2.99496000066|(0.999,1.000,0.996)|1
ASCDIQMTQSPSSVSASVGDRVTITCQASQGISSWLAWYQQKPGKAPKLLIYAASSLQSG
VPSRFSGNGSGTDFTLTISSLQPEDFATYYCQQANSFP
>V145RF-AACZ03151858.1-igkv |(2327, 2627)|3.0|(1.000,1.000,1.000)|1
TTGEIVLTQSPATLSLSPGEKATLSCRASQSVSSYLAWYQQKPGQAPRLLIYDASNRATG
ISARFSGSGSGTDFTLTISSLEPEDFAVYYCQQRSNWH
>V146RF-AACZ03151858.1-igkv |(39404, 39704)|2.99798400013|(1.000,0.998,1.000)|1
ARCAIQMTQSPSSLSASVGDRVTITCRASQGISSYLAWYQQKPAKAPKLLIYYASSLQSG
VPSRFSGSGSGTEFTLTISSLQPEDFATYYCQQLNSYP
>V147RF-AACZ03151979.1-igkv |(10219, 10519)|3.0|(1.000,1.000,1.000)|1
AKCDIQMTQSPSTLSASVGDRVTITCRASQGISSYLNWYQQKPGKAPKLLIYAASTLESG
VPSRFSGSGSGTEFTLTISSLQPDDFATYYCQQYSSTP
>V148RF-AACZ03171037.1-ighv |(18459, 18781)|2.72900563293|(0.972,0.850,0.965)|1
VLSQVTLKESGPVLVKPTETLTLTCTISGFSLSNAGMGVSWIRQPPGKALEWLAHIFWND
EKSYSTSLKSRLTISKDTSKSQVVLTMTNMDPVDTATYYCTRRAQ
>V149RF-AACZ03171037.1-ighv |(42750, 43059)|2.96405224805|(0.997,0.970,1.000)|1
THAQVQLVQSGAEVKKPGATVKISCKASGYTLTELSMHWVRQAPGKRLEWMGGFDPEDGE
TIYAQKFQGRVTMTEDTSTDTAYMELSSLRSEDTAVYYCAT
>V150RF-AACZ03171037.1-ighv |(52793, 53102)|3.0|(1.000,1.000,1.000)|1
VQCEVQLVESGGGLVKPGGSLRLSCAASGFTFSSYAMHWVRQAPEKGLEWVSTISGSGGS
TWYPDSVKGRFTISRDNSKNTLYLQMNSLRAEDTAVYYCAR
>V151RF-AACZ03171037.1-ighv |(63661, 63976)|3.0|(1.000,1.000,1.000)|1
VQCEVQLVESGGGLVKPGGSLRLSCAASGFTFSSYSMNWVRQAPGKGLEWVGFIRTKAKG
GTTEYAASVKGRFTISRDDSKSIAYLQMNSLKTEDTAVYYCTR
>V152RF-AACZ03171037.1-ighv |(86377, 86686)|3.0|(1.000,1.000,1.000)|1
VQCEVQLVESGGGLVQPGGSLRLSCAASGFTFSSYGMHWVRQAPGKGLEWVSYISYDSSY
IYYADSVKGRFTISRDNAKNSLYLQMNSLRAEDTAVYYCAT
>V153RF-AACZ03171037.1-ighv |(116832, 117141)|3.0|(1.000,1.000,1.000)|1
VQCEVQLVESGGGLVQPGGSLRLSCAASGFTFDDYGMSWVRQAPGKGLEWVSLISWDGGS
TYYADSVKGRFTISRDNSKNSLYLQMSSLRAEDTALYYCAR
>V154RF-AACZ03171037.1-ighv |(129850, 130159)|3.0|(1.000,1.000,1.000)|1
AHSQVQLVQSGAEVKKPGASVKVSCKASGYTFTSYDINWVRQATGQGLEWMGWMNPNSGN
TGYAQKFQGRVTMTRDTSISTAYMELSSLRSEDTAVYYCAR
>V155RF-AACZ03171037.1-ighv |(150598, 150907)|2.99798400013|(1.000,0.998,1.000)|1
VQCEVQLVESGGGLVQPGGSLTLSCAASGFTFSSYWMSWVRQAPGKGPEWVANIKKDGSE
KYYADSVKGRFTISRDNAKNSLYLQMNSLRAEDTAVYYCTR
>V156RF-AACZ03171037.1-ighv |(157231, 157541)|1.69172303659|(0.554,0.559,0.811)|1
WRKLDKAWVSLRLSCAASGFTFSSHSTHWVPQAPGKGLQWVSVISGSGSTIYYADSVKGR
FTISRDNTKNSLYLQMNRLRAEDAAAYYSVRDTVRRSQCEP
>V157RF-AACZ03171037.1-ighv |(174851, 175165)|2.08487247511|(0.968,0.976,0.585)|1
VLSQVTLKESGPTLVKPTQTLTLTCTFSGFSLSTSGVGVGWIRQPPGKALEWLALIYSDN
DKRYSPSLKSRLTITKDTSKNQVVLTMTNMDPVDTATYYCAHR
>V158RF-AACZ03171037.1-ighv |(187799, 188108)|2.99899600001|(1.000,1.000,0.999)|1
AHSQVQLVQSGSEVKKPGASVKVSCKASGYTFTSYAMNWVRQAPGQGLEWMGWINTNTGN
PTYAQGFTGRFVFSLDTSVSTAYLQISSLKAEDTAVYYCAR
>V159RF-AACZ03171037.1-ighv |(200692, 201001)|3.0|(1.000,1.000,1.000)|1
VLSQVQLQESGPGLVKPSETLSLTCAVSGGSISSSNWWSWVRQPPGKGLEWIGEIYHSGS
PNYNPSLKSRVTISVDKSKNQFSLKLSSVTAADTAVYYCAR
>V160RF-AACZ03171395.1-trav |(594, 882)|3.0|(1.000,1.000,1.000)|1
VKSQKIEQNSEALNIQEGKTATLTCNYTNYSPAYLQWYRQDPGRGPVFLLLIRENEKEKR
KERLKVTFDTTLKQGVFHITASQPADSATYLCAL
>V161RF-AACZ03173011.1-ighv |(4916, 5238)|2.40567904196|(0.963,0.706,0.969)|1
VLSQVTLMESGPALVKPTETLTLTCTLSGFSLSTSGMGMSWIRQPPGKALEWLAHIFSND
KKSYSTSLKNRLIISKDTSKSQVVLTMTNMDPVDTATYYCAWRAQ
>V162RF-AACZ03176953.1-iglv |(7473, 7783)|1.80490185003|(0.856,0.617,0.668)|1
SLSQPVLTQPSSHSASSGASVRLTCTLSSGFSVGDFWIRWYQQKPGNPPRYLLYYHSDSN
KGQGSGVPSRFSGSNDASANAGILRVSGLQPEDEAYYYCGT
>V163RF-AACZ03176953.1-iglv |(11235, 11544)|2.93008808336|(1.000,0.943,1.000)|1
SWAQSVLTQPPSVSAAPGQKVTISCSGSSCNIGNNYVSWYQQLPGTAPKILIYDNNKRPS
GISDRFSGSKSGTSATLGITGLQTGDEADYYCGTWDSSLSA
>V164RF-AACZ03176953.1-iglv |(41685, 41995)|2.76750316463|(0.998,0.868,0.970)|1
SLSQPVLTQPTSLSASPGASARLTCTLRSGINLGSYRIYWYQQKPGSPPRYLLRYKSDSD
KQQGSGVPSRFSGSKDASTNAGILVISGLQSEDEADYYCMI
>V165RF-AACZ03176953.1-iglv |(46517, 46826)|3.0|(1.000,1.000,1.000)|1
SWAQSVLTQPPSASGTPGQRVTISCSGSSSNIGSNTVNWYQQLPGTAPKLLIYSNNQRPS
GVSDRFSGSKSGTSASLAISGLRSEDEADYYCAAWDDSLSG
>V166RF-AACZ03176965.1-iglv |(24589, 24892)|2.75903233646|(0.928,0.964,0.881)|1
SWAQSALTQPPFVSGAPGQSVTISCTGTSSDVGDYDHVFWYQKRLSTTSRLLIYNVNTRP
SGISDLFSGSKSGNMASLTISGLKSEVEANYHCSLYSSS
>V167RF-AACZ03176987.1-iglv |(5895, 6205)|2.98851611711|(1.000,0.989,1.000)|1
SWANFMLTQPHSVSESPGQTVTISCTRSSGSIASDYVQWYQQRPGSAPTTVIYEDNRRPS
GVPDRFSGSIGSSSNSASLTISGLKSEDEADYYCQSYDSSS
>V168RF-AACZ03179884.1-ighv |(12665, 12971)|3.0|(1.000,1.000,1.000)|1
VQCEVQLVQSGGGLVQPGGSLRLSCAGSGFTFSSYAMHWVRQAPGKGLEWVSAIGTGGGT
YYADSVKGRFTISRDNAKNSLYLQRNSLRAEDMAVYYCAR
>V169RF-AACZ03182257.1-ighv |(5938, 6245)|3.0|(1.000,1.000,1.000)|1
AQCEVQLVESGGGLVQPGGSLRLSCAASGFTFSNHYTSWVLQAPGKGLEWVSYISGDRGY
TNYADSVKGRFTISRDNAKNSLYLQMNSLRAEDTAVYYCV
>V170RF-AACZ03015561.1-igkv |(2130, 2430)|2.98742416586|(1.000,1.000,0.988)|-1
AKCDIQMTQSPSTLSASVGDRVTITCRASQGISSWLAWYQQKPGKAPKLLIYKASSLESG
VPSRFSSSGSGTEFTLTISSLQPDDFATYYCQQYSSYP
>V171RF-AACZ03015561.1-igkv |(34244, 34556)|2.99796800026|(0.998,1.000,1.000)|-1
CNGDIVLTQSPASLAVSPGQRATITCRASESVSFLGINLIHWYQQKPGQPPKLLIYQASN
KDTGVPARFSGSGSGTDFTLTINLVEANDTANYYCLQSKNFP
>V172RF-AACZ03015562.1-igkv |(7056, 7356)|3.0|(1.000,1.000,1.000)|-1
TRCDIQMTQSPSSLSASVGDRVTITCRASQGISNYLAWYQQKPGKAPKLLIYYASRLESG
VPSRFSGSGSGTDYTLTISSLQPEDFATYYCQQYNSNP
>V173RF-AACZ03015562.1-igkv |(21131, 21434)|2.99899600001|(1.000,1.000,0.999)|-1
TIGEIVMTQSPATLSLSPGERATLSCRASQSVSSSYLSWYQQKPGQAPRLLIYGASTRAT
GIPARFSGSGSGTDFTLTISSLQPEDFAVYYCQQDYKLP
>V174RF-AACZ03015562.1-igkv |(33603, 33903)|3.0|(1.000,1.000,1.000)|-1
ARCDIQMTQSPSSLSASVGDRVTITCRASQGIRNDLGWYQQKPGKAPKLLIYAASSLQSG
VPSRFSGSGSGTDFTLTISSLQPEDFATYYCLQDYNYS
>V175RF-AACZ03015564.1-igkv |(7726, 8026)|3.0|(1.000,1.000,1.000)|-1
TRCDIQMTQSPSSLSASVGDRVTITCRASQSISNSLAWYQQKPGKAPKLLIYAASRLESG
VPSRFSGSGSGTDYTLTISSLQPEDFATYYCQQYYSTP
>V176RF-AACZ03015754.1-igkv |(14686, 14986)|3.0|(1.000,1.000,1.000)|-1
ARCDIQVTQSPSSLSASVGDRVTITCRTSQGISNGLSWYQQKPGQAPTLLIYAASSLQSG
IPSRFSGSGSGTDFTLTISSLQPEDVATYYCLQDYTTP
>V177RF-AACZ03016034.1-igkv |(14230, 14530)|2.96516337871|(1.000,0.969,1.000)|-1
ARCDIPMTQSPSSLSASVGDRVTITCRASQGISNNLNWYQQKPGKTPKLLIYAASSLQSG
IPSRFSDSGSGTDYTLTISSLQPEDFAAYYCQQSDSTP
>V178RF-AACZ03016143.1-igkv |(754, 1054)|2.97066265282|(1.000,0.976,0.997)|-1
ARCAIQMTQPPSSLFASVGDSVTITCRASQSVTNHWYQQKPGKAPKLLIYRVSSLQMGVP
SRFSGSGSGTDFTLTISSLQPDDVATYYCQQEYTVGVT
>V179RF-AACZ03054006.1-trbv |(3325, 3619)|2.69568630922|(0.922,0.900,0.882)|-1
VRSQTIHQWPATLVQPVGSPLSLECTVEGTSNPNLYWYRQAAGRGLQLLFYSVGIGQISS
EVPQNLSASRPQDRQFILSSKKLLLSDSGFYLCAWS
>V180RF-AACZ03095321.1-trdv |(4778, 5084)|3.0|(1.000,1.000,1.000)|-1
RGMLCDKVTQSSPDQTVASGSEVVLLCTYDAVYSNPDLFWYRIRPDYSFQFVFYGDNSRS
QAADFTQGRFSVKHILTQKAFHLVISPVRTEDSATYYCAF
>V181RF-AACZ03098097.1-ighv |(6348, 6654)|2.9909280013|(0.997,1.000,0.994)|-1
HSQVQLVQSGAEVKKLGASVKVSCKASGYTFTDYFIHWVQQAPGQGLEWMGWINPNSGGT
NYAQKFQSRVTMTRNTSISTAYMELSRLRSDDTAVYYCAR
>V182RF-AACZ03098100.1-ighv |(12261, 12570)|3.0|(1.000,1.000,1.000)|-1
VLSQVQLQESGPGLVKPSETLSLTCAVSGGSISSSNWWSWVRQPPGKGLEWIGEIYHSGS
PNYNPSLKSRVTISVDKSKNQFSLKLSSVTAADTAVYYCAR
>V183RF-AACZ03098100.1-ighv |(19369, 19678)|3.0|(1.000,1.000,1.000)|-1
AHSQVQLVQSGAEVKKPGASVKVSCKASGYTFTSYAMHWVRQAPGQRLEWMGWINTGNGN
TKYSQKFQGRVTITRDTSASTAYMELSSLRSEDTAVYYCAR
>V184RF-AACZ03098103.1-ighv |(623, 937)|2.86638776087|(0.978,0.976,0.924)|-1
VLSQVTLKESGPTLVKPTQTLTLTCTFSGFSLSTSGVGVGWIRQPPGKALEWLALIYWDD
DKRYSPSLKSRLTITKDTSKNQVVLTMTNMDPVDTATYYCAHR
>V185RF-AACZ03127313.1-iglv |(14865, 15172)|2.99593600205|(1.000,1.000,0.996)|-1
SWANFMLTQPHSVSESPGQTVTISCTRSSGSIASDYVQWYQQRPGSAPTTVIYEDNRRPS
GVPDRFSGSIDSSSNSASLTISGLKTEDEADYYCQSYDSS
>V186RF-AACZ03127314.1-igkv |(28405, 28711)|1.72904681679|(0.585,0.540,0.838)|-1
SLSQPVLTQSSSASASLGSSVKLTCTLSSGHSSYIIAWHQQQPGKAPRYLMKLEGSGSYN
KGSGVPDRFSGSSSGADRYLTINNLQSEDEADYYCETWGS
>V187RF-AACZ03127321.1-iglv |(54420, 54720)|2.99599600001|(0.999,0.998,0.999)|-1
SLSQLVLTQSPSASASLGASVKLTCTLSSGHSSYAIAWHQQQPEKGPRYLMKLNSDGSHS
KGDGIPDRFSGSSSGAERYLTISSLQSEDEADYYCQTW
>V188RF-AACZ03127321.1-iglv |(122715, 123024)|3.0|(1.000,1.000,1.000)|-1
VDSQTVVTQEPPFSVSPGGTVTLTCGLSSGSVSTSYYPSWYQQTPGQAPRTLIYSTNTRS
SGVPGRFFGSIIGNKAALTITGAQADDESDYYCLLYMGSGI
>V189RF-AACZ03151873.1-igkv |(7769, 8069)|3.0|(1.000,1.000,1.000)|-1
ARCDIQMTQSPSSLSASVGDRVTITCRASQGINNNLNWYQQKPGKTPKLLIYAASSLQSG
IPSRFCDSGSGTDYTLTISSLQPEDFATYYCQQSDGTP
>V190RF-AACZ03151911.1-igkv |(7475, 7775)|2.98474002125|(0.996,1.000,0.989)|-1
ARCDIQMTQSTSSLSASVGDRVTITCRASQGISNNLNWYQQKPGKTPKLLIYAASSLQSG
ILSRFSDSGSGTDYTLTISSLQPEDFAAYYCQQSDSTP
>V191RF-AACZ03171059.1-trav |(889, 1176)|2.83421845042|(0.977,0.892,0.995)|-1
VRSQQPVQSPQAMILREGEDAVVNCSSSKALYSVHWYRQKHGEAPIFLMILLKGGEQKGH
DKISASFNEKKQQSSLYLMASQLSYSGTYFCGAE
>V192RF-AACZ03171126.1-ighv |(3284, 3590)|2.93833728137|(0.988,0.968,0.984)|-1
VLSQVQLQQWGTELLKPSETLSLTCAVYGGSFSGYYWSWIRQPPGKGLEWIGEINHSGST
NYNPSLKSRVTISVDTSKNQFSLKLSSVTAADTAVYYCAR
>V193RF-AACZ03171149.1-trav |(1638, 1925)|3.0|(1.000,1.000,1.000)|-1
VSSEDKVVQSPLSLVVHEGDTVTLNCSYEVTNFQSLLWYKQEKKAPTFLFMLTSSGIEKK
SGRLSSILDKKELFSILNTATQTGDSAIYLCAVE
>V194RF-AACZ03171512.1-trav |(590, 893)|2.99899600001|(1.000,0.999,1.000)|-1
PGIAQKITQTQPGMFVQEKEAVTLDCTYDTSDPSYGLFWYKQPSSGEMIFLIYQGSYDQQ
NATEGRYSLNFQKARKSANLVISASQLGDSAMYFCAVRE
>V195RF-AACZ03171676.1-trav |(1205, 1504)|2.97439727933|(0.999,0.998,0.979)|-1
VNGQQVMQIPQYQHVQEGEDFTTYCNSSTTLSNIQWYKQRPGGHPVFLIQLVKSGEVKKQ
KRLTFQFGEAKKNSSLHITATQTTDVGTYFCAGHSAPQ
>V196RF-AACZ03172648.1-ighv |(10152, 10459)|3.0|(1.000,1.000,1.000)|-1
AQCEVQLVESGGGLVQPGGSLRLSCAASGFTFSNHYTSWVLQAPGKGLEWVSYISGDSGY
TNYADSVKGRFTISRDNAKNSLYLQMNSLRAEDTAVYYCV
>V197RF-AACZ03172650.1-ighv |(24637, 24943)|3.0|(1.000,1.000,1.000)|-1
VQCEVQLVQSGGGLVQPGGSLRLSCAGSGFTFSSYAMHWVRQAPGKGLEWVSAIGTGGGT
YYADSVKGRFTISRDNAKNSLYLQMNSLRAEDMAVYYCAR
>V198RF-AACZ03173117.1-ighv |(1009, 1323)|2.90817800597|(0.998,0.933,0.994)|-1
VLSQVTLKESGPVLVKPTETLTLTCTLSGFSLSTSGMGMSWIRQPPGKALEWLAHIFSND
KKSYSTSLKNRLIISKDTSKSQVVLTMTNMDPVDTATYYCAWR
>V199RF-AACZ03177116.1-iglv |(1182, 1492)|2.99598400013|(0.998,1.000,0.998)|-1
SWAQSALTQPASVSGSPGQSITISCTGTSSDVGGYNAVSWYQQHPGKAPKLMIYDVNKRP
SGVSNRFSGSKSGNTASLTISGLQAEDEADYYCSSYRSGGT
>V200RF-AACZ03178854.1-igkv |(8334, 8634)|2.99899600001|(1.000,1.000,0.999)|-1
ARCDIQMTQSPSSLSASVGDRVTITCWASQGISNNLNWYQQKPGKTPKLLIYAASSLQSG
IPSRFSDSGSGTDYTLTISSLQPEDFATYYCQQSDSTS
>V201RF-AACZ03179013.1-igkv |(41180, 41480)|3.0|(1.000,1.000,1.000)|-1
ARCDIQMTQSPSSLSASVGDRVTITCRASQGISNNLNWYQQKPGKTPKLLIYAASSLQSG
IPSRFSDSGSGTDYTLTISSLQPEDFATYYCQQSDSTP
>V202RF-AACZ03179105.1-trdv |(5604, 5904)|2.98348806553|(1.000,0.992,0.992)|-1
SSVAQKVTQAQSSVSMPVRKAVTLNCLYEASWWSYYIFWYKQLPSKEMIFLIRQGSDEQN
AKSGRYSVNFKKAAKSVALTISALQLEDSAKYFCALWE
>V203RF-AACZ03179105.1-trav |(14455, 14745)|2.22095885944|(0.976,0.675,0.898)|-1
VSSILNVEQSPQSLHVQEGDSTSFTCSFPSSNFYALHWYRWETAKSPEALFVMTLNGDEK
KKGRISATLNTKKGYSYLYIKGSQPEDSATYLCAF
>V204RF-AACZ03179105.1-trav |(21888, 22187)|2.73091878251|(0.954,0.846,0.979)|-1
VNGRQVMQIPQYQHVQEGEVFTTYCNSSTTLSNIQWYKQRPGGHPVFLIQLVKSGEVKKQ
KRLTFQFGEAKKNSSLHITATQTTDVGTYFCAGHSAPQ
>V205RF-AACZ03179105.1-trav |(33413, 33703)|2.89288022407|(0.991,0.922,0.999)|-1
TIIDAKTTQSTSMDCAEGRAANLPCNHSTISGNEYIHWYRQIHSQGPQYIIHGLKNNETN
EMASLIITEDRKSSTLILPHATLRDTAVYYCIVRV
>V206RF-AACZ03179806.1-igkv |(3188, 3488)|3.0|(1.000,1.000,1.000)|-1
ARCDIQMTQSPSSLSASVGDRVTITCRASQGIINNLNWYQQKPGKTPKLLIYAASSLQSG
IPSRFSDSGSGTDYTLTISSLQPEDFATYYCQQSDSTP
>V207RF-AACZ03183442.1-igkv |(591, 891)|2.99899600001|(1.000,0.999,1.000)|-1
ARCDIQMTQSPSSMSASVGDRVTITCRASQGINNNLNWYQQKPGKTPKLLIYAASSLQSG
IPSRFCDSGSGTDYTLTISSLQPEDFATYYCQQSDGTP
>V208RF-AACZ03191230.1-iglv |(228, 538)|2.97087023728|(0.998,1.000,0.975)|-1
SWAQSALTQPPSVSGSPGQSVTISCTGTSSDVGGYNYVSWYQQHPGTAPKLMIYDVSKRP
SGVPDRFSGSKSGNTASLTISGLQAEDEADYYCCSYAGSYS
>V0RF-ABDC01047890.1-ighv |(234, 540)|2.89498000014|(0.966,0.964,0.965)|1
VQCNVQLVESGGGLVQPGGSLTLSCAASRFTFSSYAMSWFRQAPGKGMEWVALIRNDGST
YYADAVKSEFTISRDNAKNKLYLQMNSLRAEDTALYYCAR
>V1RF-ABDC01116809.1-trbv |(1528, 1849)|1.96302944712|(0.801,0.896,0.540)|1
QVTQIPRYLITETGKKVTVTCSQNMNHEYMFWYRQDPGQGLKLVYYSVNVGFVTEGDVSE
GYTASRTERPSFPLNVESARASQTALHLCASSLYSLHSAAQPAAF
>V2RF-ABDC01116809.1-trbv |(7343, 7638)|2.71641976551|(0.944,0.956,0.851)|1
LVDAEVTQTPGHLIKRTGEKVLLECSQDMDHERMFWYRQDPGLGLRLIYFSFDVGSEEKG
DVWEAYSASRKQKDRFPLVLESAGTNQTSVYLCASR
>V3RF-ABDC01165520.1-igkv |(7469, 7769)|3.0|(1.000,1.000,1.000)|1
ARCDIQMTQSPSSLAASVGDTVTISCRASQGISSWLSWHQQKPGKPPKTLINKASNLESG
VPSRFSGSGSGTDFTLTIKGLQPEDFATYYCQQYDSSP
>V4RF-ABDC01231268.1-ighv |(5361, 5667)|2.99798400013|(1.000,0.998,1.000)|1
VQCDVQLLESGGGLVQPGGSLRLSCAASGFTFSSYYMHWVRQAPGKGLEWVSTISSGGST
YYADAVKGRFTISRDNGKSSLYLQMNSLKAEDTAVYYCAR
>V5RF-ABDC01231269.1-ighv |(3071, 3380)|2.10380343188|(0.980,0.996,0.588)|1
AHSEVQLVQSGAEVKPPGASVKVSCKASGYTFTSYYMHWVRQAPGQGLEWEGRINPSSGE
TNYAQKFQGRVTMTRDTSTSTAYMELSSLRPEDTAVYYCAR
>V6RF-ABDC01231272.1-ighv |(378, 697)|2.97322818506|(0.993,1.000,0.981)|1
VQCEVQLVESGGGLVQPGGSLRLSCVASGFTLTSYGMNWVRQAPGKGLEWISYIYSSSTS
YADSVKGRFTISTDNGKNSLYLQMNSLRAEDTAMYYCARHTVRG
>V7RF-ABDC01231274.1-ighv |(17, 332)|2.99899600001|(1.000,1.000,0.999)|1
VQCEVQLVESGGGLAQPGGSLRLSCAASGFTFSSYYMYWVRQAPGKGLEWVGFVRNKANG
GTAEYAASVKGRFTISRDDSKSTAYLQMNSLRAEDTALYYCAR
>V8RF-ABDC01231277.1-ighv |(694, 1003)|3.0|(1.000,1.000,1.000)|1
VQCEVQLAESGGGLVQPGGSLRLSCAASGFTFSNYYMYWVRQAPGKGLEWISTISNSGSS
TGYADSVKGRFTTSRDNSKNMLYLQMNSLKAEDTALYYCAR
>V9RF-ABDC01282056.1-ighv |(476, 782)|2.99899600001|(1.000,1.000,0.999)|1
VQCEVQLVESGGGLVQPGGSLKLSCAASGFTFSSYDMHWVRQAPGKGLEWVSVIGIGGST
YYADAMKGRFTISRDNGKNMLYLQMSSVQAEDTAVYYCTR
>V10RF-ABDC01282057.1-ighv |(6536, 6845)|2.99899600001|(1.000,1.000,0.999)|1
VQCEVQLVESGGGLVQPGGSLRLSCAASGFTFSSYWMYWVRQAPGKGLEWVSRINPDGGS
TNYADAVKGRFTISRDNGKNTLYLQMNSLKAEDTAVYYCAR
>V11RF-ABDC01282063.1-ighv |(1659, 1962)|2.89230439061|(0.983,0.926,0.997)|1
VQCEEQLVESGGGLVQPGGSLRLSCAASGFSFDDYVMHWIRQAPGKGLEWISYIYSSSTS
YADSVKGRFTISSDNGKNMLYLQMNSLRAEDTAMYYCAR
>V12RF-ABDC01282065.1-ighv |(718, 1027)|2.99089600501|(0.995,1.000,0.996)|1
VQCEVQLVESGGGLVPPGGSLRLSCAASGFTFSDYWMSWIRQAPGKGLEWVGEINGDGGN
TNYADAMKGRFTISRDNSKNTLYLQMNSLRAKDTAVYYCGR
>V13RF-ABDC01296165.1-iglv |(3112, 3422)|2.7230190251|(0.971,0.903,0.892)|1
SLSQPVVTQPPSLSASPGASARLTCTLSSGFSVGSYAISWHQQKPGSPPRYLLYYHTDSN
KHQGSGVPSRFSGSKDASANAGILHVSGLQPEDEADYYCAV
>V14RF-ABDC01296165.1-iglv |(8050, 8360)|2.99899600001|(1.000,1.000,0.999)|1
SLANFVLTQPSSVSGSPGQKVTISCTRSSGNIGSNYVHWYQQRPGSAPTTVIYRDDKRPS
GVPDRFSGSSDSSSNSASLTISGLQSEDEADYYCQSYDASA
>V15RF-ABDC01296166.1-iglv |(4596, 4906)|2.73507043402|(0.976,0.903,0.900)|1
SLSQPVVTQPPSLSASPGASARLTCTLSSGFSVGSYAISWHQQKPGSPPRYLLYYHTDSD
KHQGSGVPSRFSGSKDASANAGILHVSGLQPEDEADYYCAV
>V16RF-ABDC01296168.1-iglv |(909, 1230)|2.11951463355|(0.927,0.605,0.927)|1
SLSQPVLTQPPSASASPGASAKLTCTLSSGYSNYGIAWHQQHPEKSPRYLMYVYSDGSQS
KGDGIPDRFSGSSSGADRYLTISNVQPEDEADYYCQTWDGGVNHS
>V17RF-ABDC01314388.1-ighv |(6282, 6597)|3.0|(1.000,1.000,1.000)|1
VQCEVQLVESGGGLVQPGGSLKLSCAASGLTFSDYWMSWIRQAPGKGLEWAGLNRSKAYG
GIAEYAASVKDRFTISRDDSKSTAYLQMNSLKAKDTALYYCVR
>V18RF-ABDC01318810.1-iglv |(15156, 15463)|2.98450011724|(0.998,1.000,0.987)|1
SWAQSALTQPPSVSGAPGETVTISCSGSSSNIGGYDANWYQQLPGTAPKLLIYGNSNRPS
GVPARFSGSKSGSSASLTIAGLQAEDEGDYYCSSWDSSLS
>V19RF-ABDC01318812.1-iglv |(1658, 1965)|2.79313531475|(0.997,0.926,0.916)|1
SWAQSALTQPPSVSGAPGQSVTISCLGSNSNIGGNYANWYQQLPGTAPKTLIYANSNRPS
GVPARFSGSKSGSSASLTITELQAEDEADYYCSAWDDSLS
>V20RF-ABDC01339850.1-iglv |(5825, 6125)|1.94604507752|(0.668,0.989,0.632)|1
SVASQLTQVPAVSVALGQTASITCQGDGIRSYYANWYQQKPGQAPVLLIYSDNNRPSGIP
ERSSGSNSGNMATLTMNRAQADDEGDYHCQSFDSRGTL
>V21RF-ABDC01342328.1-iglv |(12642, 12952)|2.94193283577|(0.998,0.995,0.956)|1
SLANFFLTQPSSVSGSPGQKVTISCTRSSGNIGSNYVHWYQQRPGSAPSTVIYEYNKRPS
GVPDRFSGSMDSSSNSASLTISGLQSEDEADYYCQSYDGSY
>V22RF-ABDC01347843.1-iglv |(8431, 8731)|2.87696800026|(0.959,0.961,0.957)|1
SVASQPNQVPAVSVALGQTASITCQGDGLRSYYPGWYQQKPGQAPVLVFYGNNKRPSGIP
ERFSGSKSGNTAMLTISGAQADDEADYYCQTWDSTGTH
>V23RF-ABDC01347844.1-iglv |(5493, 5791)|2.7333986342|(0.974,0.839,0.992)|1
SVASQLTQVPAVSVALGQTARITCQGDSLRSYYANWYQQKPGQAPVLLIYGDNQRPSGIP
ERFSGSKSGNTATLTVSGAQVEDEADYYCGSYAGSGT
>V24RF-ABDC01349227.1-iglv |(6289, 6580)|2.9719000027|(0.991,0.994,0.987)|1
SVASQVTQVPAVSVALGQTARITCQGDSLSSYYPGWYQQKPSQAPVLVVYGNNERPSGIP
ERFSGSKSGNTATLTISGAQVEDEADYYCGSYAGS
>V25RF-ABDC01349230.1-iglv |(865, 1165)|3.0|(1.000,1.000,1.000)|1
SVASQLTQVPAVSVALGQTASITCQGDGLSSDYANWYQQKPGQAPVLLIYGENQRPSGIP
ERFSSSDSGDTATLTISGAQAGDEADYYCQVWDSENNK
>V26RF-ABDC01351831.1-igkv |(554, 852)|2.96294800078|(0.986,0.989,0.988)|1
TRCDIQVTQSPSSVSASPGDTVTISCRASQDISNRLSWYQQKPGKPPKALIYVASNLHSG
VSSRFSGSGSGTDYSLTIRGLETDDAATYFCRQYKIN
>V27RF-ABDC01351832.1-igkv |(2497, 2812)|2.95320464967|(1.000,0.962,0.997)|1
SSGDVVMTQTPVSLPVTPGEPASISCRSSQSLLHSDGKTYLYWYLQKPGQSPQLLIYLGF
TRASGVPDRFSGSGSGTDFTLKISKVEAEDVGVYYCMQAIQPP
>V28RF-ABDC01351835.1-igkv |(461, 776)|2.98070483945|(1.000,0.982,1.000)|1
SNGEIVMTQTPLSLPVTPGEPASISCRSSQSLLHSDGNTYLHWYLQKPGQSPQLLIYRVS
NRFSGVPDRFSGSGSGTDFTLKISRVEAEDVGVYYCMQGTQTP
>V29RF-ABDC01351837.1-igkv |(5117, 5415)|2.91583600705|(0.975,0.970,0.971)|1
TRCDIQVTQSPSSMSVSPGDTVTISCRASQDISNRLSWYQQKPGKPPKPLIYVASNLHSG
VSSRFSGSGSGTDYSLTIRSLETDDAATYFCRQYKNN
>V30RF-ABDC01351837.1-igkv |(9264, 9579)|2.99092000218|(0.995,0.999,0.997)|1
SSGDVVMTQTPLSLSVTPGESASISCRASQSIQDSDGNTYLNWFLQKPGQPPRRLIHKVS
NRDSGVSDGFSGSGSGTDFTLKISRVEAEDVGVYYCMQASYFP
>V31RF-ABDC01352111.1-iglv |(14382, 14693)|2.26396784759|(0.984,0.711,0.874)|1
SWAQSALTQPPSVSGAPGQSVTISCLGSSSNIGGGYVVHWYQQLPGTAPKLLIYGGSGRP
SGVPARFSGSKSGSSASLTIAGLQAKDEADYYCQSYDSSLDA
>V32RF-ABDC01352115.1-iglv |(760, 1076)|2.24541137421|(0.935,0.655,0.925)|1
SLSQPVLTQPPSASASPGASAKLTCTLSSGHSNYGITWHQQQPGKAPRYLMYVYSDGSQS
KGDGVPDRFSGSSSGADRYLTISNVQPEDEADYYCQTADSSGV
>V33RF-ABDC01359388.1-iglv |(1496, 1806)|2.97488623715|(1.000,0.977,1.000)|1
SLANFVLTQPSSVSGSPGQKVTVSCTRSSGNIGSNYVYWYQQRPGSAPTTVIYRDDQRPS
GVPDRFSGSIDSSSNSASLTISGLQSEDEADYYCQSYDGSA
>V34RF-ABDC01360510.1-igkv |(1890, 2205)|2.89057612196|(0.970,0.999,0.931)|1
SSGDIVMTQTPLSLPVTPGEPASISCRSSQSLLHSNGNTYLQWYLQKPGQSPQPLIYRVS
NRFSGVPDRFSGSGAGTDFTLKISRVEAADVGVYYCMQGIQFP
>V35RF-ABDC01360510.1-igkv |(9535, 9833)|2.82646662233|(0.919,0.938,0.992)|1
IRCDIQMTQSPSSLAASPGETVTISCRASQGINRNLAWYQHKPGNAPKRLIYGASNLQSG
VSSRFSGSGSGTDYSLTIRGLETDDVATYFCHQYNSN
>V36RF-ABDC01360510.1-igkv |(13925, 14240)|2.9296499344|(0.997,0.946,0.997)|1
SRGDIVMTQTPVSLPVTPGEPASISCRSSQSLLHSNGKTYLQWFLQKPGQSPQLLIYLGF
TRASGVPDRFSGSGSGTDFTLKISKVEAEDVGVYYCMQTIQLP
>V37RF-ABDC01360666.1-igkv |(4785, 5100)|2.99699200002|(0.999,0.998,1.000)|1
SSGDIVMTQTPLSLPVTPGESASISCRSSQSLLHSDGKTYLQWFLQKPGQSPQLLIYLGF
TRASGVPDRFSGSGSGTDFTLKISKVEAEDVGVYYCMQTIQFP
>V38RF-ABDC01360670.1-igkv |(1063, 1378)|2.61789289951|(0.942,0.795,0.966)|1
SSGDIVMTQTPLSLPVTPGEPASISCRASESLLDSDGKTYLYWFLQKPGQPPRRLIYQVS
NRDSGVSDRFSGSGSGTDFTLKISRVEAEDVGVYYCAQATKLP
>V39RF-ABDC01363519.1-trav |(2177, 2465)|1.65211336242|(0.614,0.626,0.481)|1
SLSLAKTTQPIAMESYEGQEVNIPCSHTDIATSETIFWYQQFPNQGPRFIIQGYKTNVTN
EVASLFIPADRKSSTLSLSRAALSDSAVYYCILD
>V40RF-ABDC01373300.1-ighv |(1180, 1481)|2.96886891211|(1.000,0.972,1.000)|1
VQCEVQLVESGGGLVQPGGSLRLSCVASGFTLTSYGMNWVRQAPGKGLEWISYIYSSSTS
YADSVKGRFTISTDNGKNTLYLQMNSLRAEDTAMYYCA
>V41RF-ABDC01373301.1-ighv |(8478, 8785)|2.99899600001|(1.000,1.000,0.999)|1
VQCEVQLVESGGGLVQPGGSLRLSCAASGFTFSSYYMHWVRQAPGKGLEWVSRINPDGGS
TIYADAVKGRFTISRDNSKNSLYLQMNSLKAEDTAVYYCA
>V42RF-ABDC01375549.1-ighv |(174, 483)|3.0|(1.000,1.000,1.000)|1
VQCEVQLVESGGGLVQPGGSLRLSCAASGFTFSSYWMNWVRQAPGKGLEWVADINGDGGS
TNYADAVKGRFTISRDNAKNSLYLQMNSLRAEDTALYYCAT
>V43RF-ABDC01375549.1-ighv |(8525, 8840)|2.99798400013|(1.000,1.000,0.998)|1
VQCEVQLVESGGGLVQPGGSLKLSCVASGFTFSDYYMHWVRQAPGKGLEWVAFIRNKANG
GTAEYAASVKGRFTISRDDSKSTAYLQMNSLRTEDTAVYYCER
>V44RF-ABDC01377237.1-ighv |(8637, 8946)|3.0|(1.000,1.000,1.000)|1
VQCDVQLVESGGGLVQPGGSLRLSCAASGFTFSSYWMYWVRQAPGKGLEWVSAISGNGGS
TYYADAVKGRFTISRDNGKNTLYLQMNSLKAEDTAVYYCAR
>V45RF-ABDC01377653.1-trav |(1660, 1950)|2.98342008525|(0.989,0.998,0.997)|1
MSRGEKLEQSPFLSVQEGDSSVINCTYTETTSTYFYWYKQGPREGLQLIMTIFSYEDKKQ
ERRLSVLLNKMEKHLSLHISDTQPADSAVYFCAVS
>V46RF-ABDC01377655.1-trav |(2230, 2518)|2.75637901594|(0.899,0.916,0.955)|1
VHSQKIEQNPWALSIQEGETAAVTCNYTSYSPAFFQWYRQDPEKGLVFLLLIRENEGEKQ
EGRLKVTFDTKLKQSSFYIADSQPADSAAYLCAA
>V47RF-ABDC01377657.1-trav |(531, 828)|1.65386239946|(0.703,0.595,0.523)|1
DAGAQSVTQPDGHVTVSEEHSLELRCNYSYGGAFYLFWYVQYPGHGLQLLLRYFSGDTLV
KGIKGFEAELRKNESSFTLRKPRVHWSDTAEYFCALS
>V48RF-ABDC01379531.1-trav |(895, 1198)|2.98521630725|(1.000,0.986,1.000)|1
SGMAQKVTQSQPAMWVQEKEAVTLDCTYDTRDSTYYLFWYKQPSSGEMILLIRQDSYNQQ
NATEGRYSLNFQKASKSIKLVISASQVGDSAIYFCALSE
>V49RF-ABDC01379531.1-trav |(6655, 6946)|2.99899200002|(0.999,1.000,1.000)|1
VRSQQKEVDQTPEFLSVSEGAMASLNCTYSNTASRYFFWYRQYSGKGPELLVSIFSTGDK
QEGRFTAQLNKASRYVSLVIRDSQPSDSATYLCAL
>V50RF-ABDC01384523.1-iglv |(1675, 1975)|3.0|(1.000,1.000,1.000)|1
SVASQLTQVPAVSVALGQTASITCQGDGLSSDYANWYQQKPGQAPVLLIYGENQRPSGIP
ERFSSSVSGDTATLTISGAQAGDEADYYCQVWDSENNK
>V51RF-ABDC01388284.1-trav |(3312, 3602)|2.97548806553|(0.992,0.984,1.000)|1
VRSQQVVEQTPESLVVSEGTTASLSCTYSDTASQSFLWYRQYSGKGPELLMFIYSTGDKE
EGRFTAQLNKASRNVSLLIRDSQPSDSATYLCAVS
>V52RF-ABDC01388284.1-trav |(7133, 7430)|2.84148712253|(0.957,0.932,0.955)|1
GTWAQRVTQPDGHITVSEGDPLELRCNYSSSVSPYLFWYVQYPNQGLELLLKYTSGNSLV
TGIKSFKAEFNKGETSFHLKKASAHLSDSAQYFCAVS
>V53RF-ABDC01388286.1-trav |(1105, 1402)|1.95102438708|(0.881,0.883,0.547)|1
DTRAQSVTQPDGHVTVFEGDSVELRCNYSYGATPYLFWYVQYPGQGLQLLLQYYSGNTLV
QGIKGFEAEVRKDESSFTLRKPRVHWSDTAEYFCALS
>V54RF-ABDC01391612.1-ighv |(2185, 2509)|2.9429280013|(0.983,0.980,0.980)|1
AHSEVQLVQSGAEVKPPGASVKVSCKASGYTFTSYAMHWVRQAPGQGLEYMGWINTNTGG
TSYAQKFQGRVTMTRDTSTSTAYMELSSLRPEDTAVYYCARDTVLQ
>V55RF-ABDC01393119.1-trav |(29, 326)|1.95102438708|(0.881,0.883,0.547)|1
DTRAQSVTQPDGHVTVFEGDSVELRCNYSYGATPYLFWYVQYPGQGLQLLLQYYSGNTLV
QGIKGFEAEVRKDESSFTLRKPRVHWSDTAEYFCALS
>V56RF-ABDC01394567.1-igkv |(5428, 5726)|2.98285201038|(0.996,0.990,0.997)|1
TRCDIQMTQSPSSVSASPGETVTISCRASQGINNNLVWYQHKPGKPPKSLIYGASNLYPG
VLSRFSGSGSGTDYSLTIRGLETDDAATYYCQQYNSF
>V57RF-ABDC01394567.1-igkv |(9543, 9858)|2.95556408064|(0.983,0.980,0.993)|1
SSGDVVMTQTPLSLPVTPGESVSITCRASQSLQDSDGNTYLNWVLQKPGQPPKRLIYKVS
NGDNGVSDRFSGSGSGTDFTLKISRVEAEDVGVYYCMQASYFP
>V58RF-ABDC01396012.1-igkv |(1397, 1712)|2.97317355698|(1.000,0.979,0.996)|1
SSGEIVMTQSPLSLPVTPGEPASISCRSSQSLLHSNGNTYLQWFLQKPGQSPQLLIYLGF
TRASGVPDRFSGSGSGTDFTLKISRVEAEDVGVYYCMQAIQYP
>V59RF-ABDC01398089.1-iglv |(1263, 1573)|2.74091362368|(0.974,0.927,0.882)|1
SLANLVLTQPSSVSGSPGQKVTISCTRSSGDIGGYYVHWHQQRPGSAPTTVIYEDNERPS
GVPDRFSGSIDSSSNSASLTISGLQSEDEADYYCQSYDDSC
>V60RF-ABDC01398089.1-iglv |(8544, 8868)|2.84631908855|(0.973,0.933,0.949)|1
SLSQPVLTQPPSLSASLGASAGLTCTLSSGTVVGGYHISWYQQKPGGPPRYLLRYYSDSD
KHQGSGVPSHFSGSKDASANAGILQVSRLQPEDEADYYCMTYHANS
>V61RF-ABDC01399103.1-trbv |(74, 387)|2.79647384997|(0.970,0.892,0.959)|1
PLDTAVFQTPKYLLTQTGNDVSLKCEQTLGYDTMYWYKQDSTKLLKIMFIYSNKEKILNE
TASNRFSPESPDKAHLNLHINSPEPGDSAVYLCASSYDTALQ
>V62RF-ABDC01399713.1-iglv |(4883, 5179)|2.94317665107|(0.997,0.959,0.993)|1
SWAQSALTQPPSVSGAPGQSVTISCSNIKGSYAHWYQQLPGTAPKLLIYYNSDRASGVPA
RFSGSKSGSSASLTIAGLQAEDEADYYCQSYDSSLDA
>V63RF-ABDC01405194.1-trbv |(1647, 1933)|2.42582835194|(0.949,0.859,0.770)|1
AGVTQTPGHLIRARGQQMTLKCFPVSGHNRVYWYQQTPGQGLQFLIEYYNGEQGQKENIS
PRFSGHQFSDYRSELNLSALELGDSALYLCASS
>V64RF-ABDC01405197.1-trbv |(132, 429)|2.46420625656|(0.786,0.962,0.848)|1
HVGAMVMQNPRYQVTRVGKTVTLSCSQNMNHDTMYWYQQKLSQAPKLLFYYYDTEFNNET
DTSYNFQPSRPNTSFSSVDIRSPGLGDSAVYLCASSR
>V65RF-ABDC01407894.1-ighv |(4990, 5305)|3.0|(1.000,1.000,1.000)|1
VQCEVQLVESGGGLAQPGGSLRLSCAASGFTFSDYYMSWVRQAPGKGLEWVGFIRNKANG
GTAEYAASVKGRFTISRDDSKSTTYLQMNSLRAEDTALYYCAR
>V66RF-ABDC01410282.1-trav |(2484, 2790)|1.56161108021|(0.526,0.722,0.922)|1
SGMSQQIIQPQLAISKQEGETVELECSYDTSVPYHILYWYKRPPSGEIIYLIHHRIDADT
NATTQGRYSVSFQKATKTIRLIISSSQPEDSATYFCCLRQ
>V67RF-ABDC01417489.1-ighv |(3793, 4108)|3.0|(1.000,1.000,1.000)|1
VQCEVQLVESGGGLAQPGGSLRLSCAASGFTFSDYYMNWVRQAPGKGLEWVGVIRNKANG
GTAEYAASVKGRFTISRDDSKSTAYLQMNSLRAEDTALYYCAR
>V68RF-ABDC01417539.1-iglv |(3342, 3652)|2.97840127932|(1.000,1.000,0.980)|1
SLANIVLTQPSSVSGSPGQKVTLSCTRSSGDIGSSYVSWYQQRPGSAPTTVIYEDNERPS
GVPDRFSGSIDSSSNSASLTISALQSEDEADYYCQSYDDSY
>V69RF-ABDC01418168.1-iglv |(580, 890)|2.30089034063|(0.978,0.690,0.926)|1
SLSQPVVTQPPSLSASPGASARLTCTLRSDISVGGKDMYWYQQKPGSPPRYLLYYYSDSN
KHQGSGVPSRFSGSKDASANAGILHVSGLQPEDEADYYCAV
>V70RF-ABDC01418168.1-iglv |(5505, 5817)|2.98874002125|(1.000,0.996,0.993)|1
SLANLVLTQPSSVSGSPGQKVTISCTRSSGDIGDAYVTWYQQRPGSAPTTVIIGDDQRPS
RVPDRFSGSIDSSSNSASLTISGLQSEDEADYYCQSYGIRNS
>V71RF-ABDC01418428.1-trav |(328, 621)|2.98694800078|(0.994,0.996,0.997)|1
VRGGENVGLHPPTLSVQEGDTSVINCSYSDSASSYLLWYKQKLGKSPQSIIDIRSNMGKK
QKGRFTVFLSKTAKHLSLHIAATQPGDSAVYFCAES
>V72RF-ABDC01421861.1-ighv |(7067, 7376)|2.99498000014|(0.998,0.997,1.000)|1
VQCEVQLLESGGGLVQPGGSLRLSCAASGFTFSSYYMSWVRQAPRKGLEWVSYINGDGGY
TNYADAVKGRFTISRDNSKNSLYLQMNNLKAEDTAMYYCAR
>V73RF-ABDC01422153.1-iglv |(2569, 2876)|2.99799600001|(0.999,1.000,0.999)|1
SWAQSALTQPPSASGAPGQSVTISCSGSSSNIGGNYANWYQQLPGTAPKLLIYGNSDRPS
GVPARFSGSKSGSSASLTIAGLQAEDEGDYYCSSWDDSLS
>V74RF-ABDC01423814.1-ighv |(3316, 3625)|3.0|(1.000,1.000,1.000)|1
VQCEVQLVESGGGLVQPGGSLRLSCAASGFTFSSYAMSWVRQAPGKGLEWVSTISNGGGS
TYYTDAVKGRFTISRDNSKNSLYLQMNSLRAEDTALYYCAR
>V75RF-ABDC01436920.1-trav |(1407, 1731)|2.41802070333|(0.767,0.841,0.903)|1
VSGQNQVEQSPQSLIILEGENGTLQCNHTVSPFNNLRWYKQETGKGPVSLIIMTYSKNKE
SKGRYTATLDANTKQSSLHVTASQLSDSASYICVVSALCFPGTDSQ
>V76RF-ABDC01437312.1-trav |(895, 1195)|1.98610978873|(0.624,0.810,0.808)|1
STVAQKVTQAQPATSMTVGQAVILNCQYETSWPQYYIYWYKQIPSKEMIFLLRQGSTRPS
EKSGRYSLNFEKEDKSINLTISALRLEDSAKYYCALQE
>V77RF-ABDC01440241.1-trav |(2301, 2594)|2.86338645581|(0.951,0.932,0.987)|1
VRGGENVGLHPPTLSVQEGDTSVINCSYSNSASIYFSWYKKELGKGPQFIIDIRSNRDKK
EEQRFTIFVNKTVKHLSLHIAGTQPGDSAVYFCAES
>V78RF-ABDC01440685.1-ighv |(539, 848)|2.05712015526|(0.985,0.998,0.571)|1
AHSEVQLVQSGAQVKPPGASVKVSCKASGYTFTSYYMHWVRQAPGQGLEWVGRINPSSGE
TNYAQKFQGRVTMTRDTSTSTAYMELSSLRPEDTAVYYCAR
>V79RF-ABDC01442374.1-iglv |(1223, 1533)|2.99280401921|(1.000,0.993,1.000)|1
SLTNLVLTQPNSVSGSPGQKVTISCTRSTGSIGGYFVHWYQQRPGSAPTTVIYADDQRPS
GVPDRFSGSIDSSSNSASLTISGLQSEDEADYYCQSYDDSY
>V80RF-ABDC01445022.1-trav |(2658, 2952)|2.9431802388|(0.975,0.988,0.981)|1
SVTQTEGQMLLTERDSLIVNCSYETSQYPSLFWYVQYPGEGPQLLLKAMKANDKGINKGF
EATYNRETTSFHLQKASVHESDSAVYYCALSDTVTG
>V81RF-ABDC01446518.1-igkv |(1290, 1603)|2.88615356499|(0.996,0.987,0.924)|1
SSGDVVMTQTPLSLPVTPGESASISCRASQSLLYSDGNTYLNWFLQKPGQPPKLLIYKIS
NRDSGVSDRFSGSGSGTDFTLKISRVEAEDVGVYYCTQGTKL
>V82RF-ABDC01449636.1-iglv |(4939, 5239)|2.99699200002|(0.999,0.998,1.000)|1
SVASQLTQVPAVSVALGQTARITCQGDSLSSYYPNWYQQKPGQAPVLLIYGENQRPSGIP
ERFSSSVSGDTATLTISGAQAGDEADYYCQVWDSENNK
>V83RF-ABDC01454767.1-ighv |(1191, 1500)|3.0|(1.000,1.000,1.000)|1
VQCEVQLVESGGGLVQPGGSLRLSCAASGFTFSSYWMNWVRQAPGKGLEWVADINGDGGS
TNYADAVKGRFTISRDNAKNSLYLQMNSLRAEDTALYYCAT
>V84RF-ABDC01466438.1-iglv |(4568, 4875)|2.99799600001|(0.999,1.000,0.999)|1
SWAQSALTQPPSASGAPGQSVTISCSGSSSNIGGNYANWYQQLPGTAPKLLIYGNSDRPS
GVPARFSGSKSGSSASLTIAGLQAEDEGDYYCSSWDDSLS
>V85RF-ABDC01472745.1-igkv |(710, 1025)|2.37748450958|(0.890,0.734,0.852)|1
SSGDVVMTQTPLSLPVTPGELASISCRASESLLYSDGNTYLNWFVQKPGQPPKRLIYKVS
NRDNGVSDRFSGSGSGTDFTLKISRVEAEDVGVYYCVQGTKLP
>V86RF-ABDC01478578.1-trav |(2035, 2325)|1.58212324788|(0.534,0.712,0.943)|1
VSSQELEQSPRSLIIQEGEDLTINCNSSKTLYGIQWYRQKYGEGGLSFLMLLLKSVEEKS
HEKITARLDEKKQQSSLHITASDPSHSGIYLCGAE
>V87RF-ABDC01487737.1-trbv |(1203, 1500)|2.01923482381|(0.947,0.907,0.583)|1
SVTAGVTQTPRFQILKTGQNTTLTCTQDTNHEEMYWYRQDPGLGLRLIYYSVGVGITEKG
QVYNGYNVSRSSTETFPLTLESATPSQTSGYFCASSE
>V88RF-ABDC01488042.1-igkv |(970, 1286)|2.05988223716|(0.680,0.679,0.703)|1
SLSQPVLTQPPSASASPGASAKLTCTLSSAHSGYTIAWHQQQPGKAPRYLMRVYSDGSQS
KGDGIPDRFSGSSSGADRYLTISNVQPEDEADYYCQTGDSSGV
>V89RF-ABDC01490559.1-trbv |(1388, 1679)|2.72296739792|(0.917,0.886,0.924)|1
AGVSQSPRHKVTERGQNVTLSCDPISGHNVLYWYRQTLGQGPQYLVYFQGREATDKSGLR
SERISAERPEGSFSTLKIQLAEQGDSAVYLCASSL
>V90RF-ABDC01491653.1-trav |(356, 647)|2.99899200002|(0.999,1.000,1.000)|1
VRSQQKEVDQTPEFLSVSEGAMASLNCTYSNTASRYFFWYRQYSGKGPELLVSIFSTGDK
QEGRFTAQLNKASRYVSLVIRDSQPSDSATYLCAL
>V91RF-ABDC01492430.1-ighv |(1622, 1908)|1.84632972763|(0.726,0.603,0.620)|1
EVRPPGASVKVSCKASGYTFTSYYMYWMKQAPGQGLEWMRRIDPEDGSTRYAQKFQGRVT
MTATTSTNTAFMELSNLRPEDTAVYYCARHSVT
>V92RF-ABDC01497734.1-trdv |(531, 837)|2.97156408064|(0.993,0.996,0.983)|1
STVAQKVTQVETARSTTVGAVVTLNCQYETSGGAYFFIFWYKQLPSKEMIFLLRQGSDLY
NAKDDQRYSVNFQEEANSIDLTISALRLEDSAKYFCALAE
>V93RF-ABDC01498106.1-iglv |(348, 644)|2.94317665107|(0.997,0.959,0.993)|1
SWAQSALTQPPSVSGAPGQSVTISCSNIKGSYAHWYQQLPGTAPKLLIYYNSDRASGVPA
RFSGSKSGSSASLTIAGLQAEDEADYYCQSYDSSLDA
>V94RF-ABDC01519549.1-trav |(483, 780)|1.76558876026|(0.896,0.817,0.516)|1
DARAQSVTQTDGHVTVFEGDSVELRCNYSYGATPYLFWYVQYPGQGLQLLLQYYSGNTLV
QGIKGFKAEFRKNESSFTLRKPRVHWSDTAEYFCALS
>V95RF-ABDC01522041.1-igkv |(82, 382)|3.0|(1.000,1.000,1.000)|1
ARCDIQMTQSPSSLAASVGDTVTISCRASQGISSWLSWHQQKPGKPPKTLINKASNLESG
VPSRFSGSGSGTDFTLTIKGLQPEDFATYYCQQYDSSP
>V96RF-ABDC01523330.1-igkv |(1251, 1566)|2.95444567112|(0.998,0.969,0.991)|1
SSGEIVMTQSPLSLPVTPGEPASISCRSSQSLLHSNGNTYLYWFLQKPGQSPQPLIYLVS
NRFSGVSDRFSGSGSGTDFTLKISRVEAEDVGVYYCMQDLQTP
>V97RF-ABDC01526110.1-trav |(609, 906)|1.65386239946|(0.703,0.595,0.523)|1
DAGAQSVTQPDGHVTVSEEHSLELRCNYSYGGAFYLFWYVQYPGHGLQLLLRYFSGDTLV
KGIKGFEAELRKNESSFTLRKPRVHWSDTAEYFCALS
>V98RF-ABDC01527872.1-trbv |(327, 624)|2.93192000218|(0.978,0.974,0.980)|1
PLDTAVFQTPKYLLTQTGNNVSLKCGQTLGHDNMYWYKQDATKLLKIMFSYNNQELMVNE
TASNRFSPESPDKAHLNLHINSPEPGDSAVYLCASSD
>V99RF-ABDC01533414.1-trav |(231, 518)|2.84014322342|(0.930,0.947,0.971)|1
VNSQQGEENLQALSIQEGENATINCSYTSSINNLQWYRQDAGRGPTLLILIRANKREERH
GRLTATLNPSIKSSSLIITASCAADTATYFCATD
>V100RF-ABDC01533415.1-trav |(1221, 1515)|2.99089600501|(0.995,0.996,1.000)|1
GTDGDSVTQTEGPVTLPEGEALTLNCTYQSNYAAFLFWYVQFQNKEPELLLKSSSETQET
DGRGFQANNNKSDSSFHLKKPSVQLSDSAVYFCAMR
>V101RF-ABDC01542818.1-trav |(328, 615)|2.98567205249|(0.998,0.989,0.999)|1
VSSEDKVVQSPPSMAVHEGDSATLTCNYVVSYFRSLQWYKQEKNAPVFLFTLTSSGIEKK
SGRFSSILDNKELSTLNITATQTGDSAIYFCAVE
>V102RF-ABDC01556235.1-iglv |(1158, 1468)|2.52809123569|(0.954,0.903,0.787)|1
SLSQPVVTQPPSLSASPGASARLTCTLSSGFSVGSYAISWHQQKPGSPPRYLLYYHTDSD
KHQGSGVPSRFSGSKDALANAGILHVSGLQPEDEADYYCAV
>V103RF-ABDC01570800.1-iglv |(151, 463)|2.91353455004|(0.983,0.993,0.944)|1
SLANLVLTQPSSVSGSPGQKVTISCTRSSGDIGDAYVNWYQQRPGSAPTTVIYGDDQRPP
RVPDRFSGSIDSSSNSASLTISGLQSEDEGDYYCQSYGIRNS
>V104RF-ABDC01583217.1-igkv |(589, 904)|2.99494800078|(1.000,0.998,0.997)|1
SSGDIVMTQTPLSLPVTPGEPASISCRSSQSLLHSDGKTYLYWYLQKPGQSPQLLIYLGF
TRASGVPDRFSGSGSGTDFTLKISKVEAEDVGVYYCMQTIQLP
>V105RF-ABDC01598575.1-trbv |(504, 790)|2.44586638958|(0.805,0.775,0.948)|1
AGVTQTPGHLITARGQQVTLKCSPVSGHPSVFWYKQALGEGPQFLIQYYEEKESDKGNFP
ARFSGHQFSDYRSELNLSALELGDSALYLCASS
>V106RF-ABDC01599688.1-igkv |(938, 1236)|2.65514209499|(0.988,0.997,0.801)|1
IRCDIQMTQSPSSLAASPGETVTISCRASQGISNYLSWYQQKPGKPPKSLIYGASNLHSG
VSSRFSGSGSGTDYSLTIRGLETDDAATYYCQQGHSY
>V107RF-ABDC01281089.1-trbv |(2653, 2950)|2.83104157414|(0.949,0.956,0.928)|-1
PMDTGVTQTPRHLVMGMTDKKSLECGQNLEHNAMYWYKQSAKKALEPLFIFNYKKLYENV
TVPSRFTPEYQDNAHFYLHLDALQPEDSATYLCASSQ
>V108RF-ABDC01281093.1-trbv |(2690, 2987)|1.96213738226|(0.935,0.815,0.611)|-1
PMDTGVTQTPRHLVMGMTDKKSLECEQNLGHNAMYWYKQSAKKAPELMFLCRLQKLTDNL
TVPSRFTPECRDSSHLYLHLDALQPEDSATYLCASSQ
>V109RF-ABDC01281094.1-trbv |(2622, 2919)|2.95636106127|(0.990,0.971,0.997)|-1
PLDTAVFQTPKYLLTQTGNDVSLKCEQTLGHNSMYWYKQDSTKLLKIMFSYNNQEKILNE
TASNRFSPESPDKAHLNLHINSPEPGDSAVYLCASSD
>V110RF-ABDC01281096.1-trbv |(2097, 2394)|2.93094425777|(0.985,0.991,0.958)|-1
PTDTGVTQTPRHLVMGMTDKKSLKCHQNLGHNAMYWYKLSAKKPPELMFYYYYQALRENM
TVPSRFSPECPDNSHLYLHLDALQPEDSATYLCASSQ
>V111RF-ABDC01281097.1-trbv |(3192, 3492)|2.97270402421|(0.995,0.988,0.990)|-1
HTEPGVIQTPSHQVTKKGQEVILRCDPISGHLYFYWYRQISGQKLEFLVSFYNDNISEKS
ELFTDQFSLKRPKGSYLALKIQSTELEDSAMYFCASSK
>V112RF-ABDC01281097.1-trbv |(8780, 9077)|2.93596000066|(0.978,0.977,0.981)|-1
PLDTAVFQTPKYLLTQMGNNVALKCGQTLGHDYMYWYKQDSTKLLKIMFTYNNQELMLNE
TASNRFSPESPDKAHLNLHINSPEPGDSAVYLCASSD
>V113RF-ABDC01345813.1-ighv |(1734, 2043)|2.99696400065|(1.000,1.000,0.997)|-1
VRCEVQLVESGGGLVQPGGSLRLSCAASGFTFSSYGMHWVRQAPGKGLEWVAVIRYDGSK
QYYADAVKGRFTISRDNSKNMLYLQMNSLKVEDTAMYYCAK
>V114RF-ABDC01345814.1-ighv |(4248, 4551)|2.95163747374|(0.997,0.964,0.995)|-1
VQCDVQLVESGGGLVQPGGSLRLSCAASGFTLSSYGMNWVRQAPGKGLEWVSYIYSSSTY
YADSVKGRFTTSRENSQNMLYLQMNSLRDEDTAMYYCAR
>V115RF-ABDC01345817.1-ighv |(603, 906)|2.99294800078|(0.998,1.000,0.995)|-1
VQCEVQLVQSGGGLVQPGGSLRLSCAASGFTFSSYGMNWVRQAPGKGLEWVSYIYSSSTY
YADSVKGRFTTSRENSQNMLYLQMNSLRDEDTAMYYCAR
>V116RF-ABDC01358932.1-igkv |(615, 919)|2.9341507773|(0.998,0.959,0.984)|-1
SSGDIVMTQTPLSLPVTLGEPASISCRSSQSLLHSDGNSYMCWYLQKPGQSLQPLIYRVS
NRFSGVPDRFSGSGSGTDFTLKISRVEAEDVGVYYCMQD
>V117RF-ABDC01363308.1-ighv |(7252, 7561)|1.91146904737|(0.977,0.998,0.514)|-1
AHSQVQLVQSGAEVRPPGASVKVSCKASGYTFTSYYMHWVKQAPGQGLEWMGRVDPEDGS
TSYAKKFQGRVTMTATTSTNTAFMELSNLRPEDTAVYYCAR
>V118RF-ABDC01368596.1-trbv |(1048, 1348)|2.80285601818|(0.945,0.953,0.910)|-1
HTDAGVIQTPRHEVTEMGQAVTLKCEPISGHDTLLWYKQTLVQGLELLTYFRSQSQIDDA
GMPKGRFSAEMPNASFSTLKIQPTELRDSAVYLCASSS
>V119RF-ABDC01368601.1-trbv |(2109, 2406)|2.97591252616|(0.999,0.983,0.995)|-1
SVTAGVTQTPRFQILKTGQNMTLMCTQDTNHDSMYWYRQDPGLGLRLIHYSVAAGTTARG
DIPEGYNVSRSSTETFSLTMESATPSQTSAYFCASSE
>V120RF-ABDC01368602.1-trbv |(3661, 3963)|1.88993328702|(0.825,0.629,0.670)|-1
AGVTQTPGHLIKARGQQVTLKCFPVSGHDQVSWYQQALGQGPQFLIQYYGGQELEKGNFP
ARFSGHQFRDYRSELNLSALELGDSALYLCASSFHSPAE
>V121RF-ABDC01381867.1-igkv |(294, 594)|1.79250147823|(0.632,0.585,0.591)|-1
TTGNTALIQFPEHLTASLGDSVSINCRAGQSISDYLSWYQQKPGQAPKLLIYDADNLYSG
VSSRFTGLQSGTEFILTITNVKADDAATYYCQQDYTVP
>V122RF-ABDC01396906.1-ighv |(901, 1210)|3.0|(1.000,1.000,1.000)|-1
VQCEVQLVESGGGLVQPGGSLRLSCAASGFTFDYYGMNWVRQAPGKGLEWVSYISWNGGS
TYYADAVKGRFTISRDNSKNMLYLQMNSLRAQDTAVYYCAR
>V123RF-ABDC01406436.1-iglv |(5624, 5924)|1.94604507752|(0.668,0.989,0.632)|-1
SVASQLTQVPAVSVALGQTASITCQGDGIRSYYANWYQQKPGQAPVLLIYSDNNRPSGIP
ERSSGSNSGNMATLTMNRAQADDEGDYHCQSFDSRGTL
>V124RF-ABDC01418360.1-iglv |(1917, 2229)|2.91291054075|(0.985,0.968,0.963)|-1
SVAFQLTQVPAVSVALGQTASITCQGEGLSSYYVNWYQQKPGQAPVLIIYTDIFSNSNRP
SGIPERFSSSVSGDTATLTISGAQAQDEADYYCQVWVSENNK
>V125RF-ABDC01419594.1-ighv |(2167, 2474)|2.28054646452|(0.979,0.996,0.653)|-1
AHSQVQLVQSGAEVKPPGASVKVSCKASGYTFTSYYMHWVRQTPGQGLEWMGEINPNSGG
TSYAQKFQGRVTMTRDTSTSTAYMELSSLRPDDTAVYYCA
>V126RF-ABDC01425625.1-iglv |(109, 419)|2.9455717188|(1.000,1.000,0.954)|-1
SLANFVLTQPSSVSGSPGQKVTISCTRSSGNIGSYYVQWYQQRPGSAPSTVIYKHNKRPS
GVPDRFSGSIDSSSNSASLTISGLQSEDEADYYCQSYDGSY
>V127RF-ABDC01454736.1-trav |(1674, 1968)|2.9939280013|(0.996,0.999,0.999)|-1
RTHGNSVTQTEGQVTLSEKAFLHINCTYTSTGYPSLFWYVQYPGEGPQLLLKAATANDKG
MNKGFEATYKKETTSFHLEKASVHESDSAVYYCAMS
>V128RF-ABDC01455982.1-trbv |(239, 546)|2.81870011863|(0.997,0.995,0.880)|-1
HTDAGITQNPRHKITEIGKQVTLSCHQNDNHFYMYWYRQDLGHGLRLIYYSVDAQSTDKE
EVAEGYKVSRSNKEDFLLFLESATRSQTSVYFCASSEYTA
>V129RF-ABDC01465190.1-iglv |(381, 691)|2.97488623715|(1.000,0.977,1.000)|-1
SLANFVLTQPSSVSGSPGQKVTVSCTRSSGNIGSNYVYWYQQRPGSAPTTVIYRDDQRPS
GVPDRFSGSIDSSSNSASLTISGLQSEDEADYYCQSYDGSA
>V130RF-ABDC01471087.1-ighv |(643, 952)|2.99899600001|(1.000,1.000,0.999)|-1
VQCEVQLVESGGGLVQPGGSLRLSCAASGFTFSDYWMNWVRQAPGKGLEWVAHIRYDGSK
QYYADAVKGRFTISRDNSKNSLYLQMNSLRAEDTALYYCAR
>V131RF-ABDC01473376.1-trbv |(205, 505)|2.98192000218|(0.996,0.994,0.992)|-1
SYDAKVTQTPGHLIKEKGQKASMDCTPQQGHNSLYWYQQSQNKELEFLVYFENKELFDQT
EMHKKRFSSKCPPDSPCRLEILSSEPGDSALYFCASSP
>V132RF-ABDC01491936.1-trbv |(1492, 1778)|2.00943771861|(0.867,0.577,0.852)|-1
AGVTQTPRHLITARGQQVTLKCFPVSGHNQVSWYQQALGQGLQFLIQYFEGEEREKGNFP
ARFSGHQFSDYRSELNLSALELGDSALYLCASS
>V133RF-ABDC01493416.1-ighv |(429, 735)|3.0|(1.000,1.000,1.000)|-1
VQCDVQLLESGGGLVQPGGSLRLSCAASGFTLSSYYMHWVRQAPGKGLEWVSTISSGGST
YYADAVKGRFTISRDNGKSSLYLQMNSLKAEDTAVYYCAR
>V134RF-ABDC01537099.1-igkv |(1719, 2017)|2.95283600705|(0.984,0.989,0.980)|-1
TRCDIQVTQSPSSVSASPGDTVTISCRASQDISNRLSWYQQKPGKPPKALIYVASNLHSG
VSSRFSGSGSGTDYSLTIRGLETDDAATYFCRQYKNN
>V135RF-ABDC01540867.1-iglv |(1970, 2280)|2.99696400065|(1.000,0.997,1.000)|-1
SLANFVLTQPSSVSGSPGQKVTISCTRSSGNIESSYVHWYQQRPGSAPTTVIYDDNERPS
GVPDRFSGSIDSSSNSASLTISGLQSEDEADYYCQSYDASA
>V136RF-ABDC01560090.1-trbv |(258, 558)|2.98993200206|(0.995,0.999,0.996)|-1
SMDTEVTQSPRYLVKGKEQKTKMDCVPKKGHSYVYWYQKKLEEGLKFLVYLQDEDIIEKE
EIINNRFSAQCPKNSPCILEIQSTESGDSALYFCASSQ
>V137RF-ABDC01562688.1-igkv |(1193, 1508)|2.99493200206|(1.000,0.996,0.999)|-1
SSGDIVMTQTPLSLPVTPGETASISCRASQSIQYSDGNTYLNWFLQKPGQPPKRLIYKVS
NRDSGVSDRFSGSGSGTDFTLTISRVEAEDVGVYYCMQASYYP
>V138RF-ABDC01582683.1-iglv |(809, 1119)|2.68624208632|(0.988,0.960,0.833)|-1
SLSQPVLTQPSSLSASPGASARLTCTLSSGSSVGSYWINWYQQKPGSPPRYLLSYYSDSY
KHQVSGVPSRFSGSKDASANAGILHVSGLQPEDEADYYCAV
>V139RF-ABDC01624510.1-iglv |(99, 409)|2.99696400065|(1.000,0.997,1.000)|-1
SLANFVLTQPSSVSGSPGQKVTISCTRSSGNIESSYVHWYQQRPGSAPTTVIYDDNERPS
GVPDRFSGSIDSSSNSASLTISGLQSEDEADYYCQSYDASA
>V140RF-ABDC01625120.1-trbv |(508, 808)|1.93193386599|(0.628,0.872,0.645)|-1
HAGAGVSQSPRHKVTERGQNVTLSCDPISGHISLYWYRQTPEKGLEFLIYFQREEEGDKS
GLRSDRFSAERPEGSVSTLKIRAAEQGDSTLYLCTSSL
>V141RF-ABDC01653181.1-trbv |(226, 512)|2.42582835194|(0.949,0.859,0.770)|-1
AGVTQTPGHLIRARGQQMTLKCFPVSGHNRVYWYQQTPGQGLQFLIEYYNGEQGQKENIS
PRFSGHQFSDYRSELNLSALELGDSALYLCASS
>V142RF-ABDC01655862.1-trbv |(462, 762)|1.83097515212|(0.635,0.991,0.606)|-1
HAGAGVSQSPRHKVAEKGQNVTLRCDPISGHDFLYWYRHTLGQGPQFLIYFQDKGVAEQS
KLIGERISAERPEGSFSTLKIRPAEQGDSAVYLCTSSL
>V0RF-JYKQ01003191.1-trgv |(1259, 1575)|2.9548997325|(0.998,0.988,0.972)|1
SQKSSNLEGRTKSVTRPTGSSAEITCDLPEVSSFYIHWYLHQEGKAPQRLLYYDSSNSRV
VLESGISSGKYDSYGSTRRRNLRLRLQNLIENDSGVYYCANWD
>V1RF-JYKQ01003191.1-trgv |(5603, 5916)|2.96640647223|(1.000,1.000,0.970)|1
GQKSSNLEGITKSVTRPTGSSAEITCDFSGDSNFYIHWYLHQEGKVPQRLLYYDVSNSRD
VLESGLSPGKYYTHTRTRWSWILILRNLIENDSGVYYCANWD
>V2RF-JYKQ01005758.1-ighv |(2900, 3215)|2.9868400105|(0.997,0.991,0.999)|1
VKCEAQLMESGGGLVQPGGSLRLSCAASGFTFSSYGMSWVHQTPGKGLEWVGLIRNKADG
ETTDYAASVKGRVTISRDDSKSITSLQMNNLKTEDTAVYYCAR
>V3RF-JYKQ01005763.1-ighv |(2160, 2469)|2.96008424741|(0.997,0.970,0.996)|1
VQCEVQLVESGGGLVQPGASLRLCCAASGFTFSSTRMNWIRQSPGKKLEWVADIKYDGSE
KYYVDSVKGRFTISRDNAKNSLYLQMNSLRAEDTAVYYCVR
>V4RF-JYKQ01005763.1-ighv |(9395, 9701)|2.40136199755|(0.953,0.990,0.696)|1
VCAEVQLVQSGEVKRPGESLRISCKTSGYSFTSSWISWVRQMPGKGLEWMGMIYPGDSDT
RYSPSFQGHVTISADKSISTVHLQWSSLKASDTATYYCAK
>V5RF-JYKQ01005769.1-ighv |(5096, 5411)|2.91921519324|(0.945,1.000,0.997)|1
VQCEVQLVESGGGLAQPGGSLRLSCAASGFTFSDHYMDWVRQAPGKGLEWVGRIRNKANG
YTTEYAASVKGRFTISRDDSKNTLYLQMSSMKTEDTAVYHCAR
>V6RF-JYKQ01005770.1-ighv |(7257, 7566)|2.99798400013|(1.000,0.998,1.000)|1
VQCEVQLVESGGGLVQPGRSLRLSCATSGFTFSNYWMFWVRQAPGKGLEWVSSISGSSSS
TYYPDSVKGRFTISRDNAKNMLYLQMNSLRAEDTAVYYCAR
>V7RF-JYKQ01005771.1-ighv |(8999, 9305)|2.77902751466|(0.940,0.878,0.984)|1
VQCEVQLVEYGGGLVQRGGSLRLSCGFTFSVHFMSWVHQAPAKGLEWVGFMRNKANGGTT
EYATSVKGRSTISRADSKSMASLQMSSLNTEDTAVYYCAR
>V8RF-JYKQ01005772.1-ighv |(16443, 16752)|2.82937438397|(0.989,1.000,0.884)|1
VQCEVQLVESGGGLVQPGGSLRLSCAASGFTFSNYWMNWVRQAPGKGLEWVARIKSKADG
ETANYAASVKGRFTISRDDSKNTLYLQMNSLKTEETAVYYC
>V9RF-JYKQ01005772.1-ighv |(36472, 36781)|2.99293600205|(0.999,0.995,0.999)|1
VQGEVQLVESGGGLAKPGGSLRLSCAASGFTFSSYWMHWVRQAPGKGLEWISAINSAGSS
IYYADSVKGRFTISRENAKNTLYLQMNSLRAEDTAVYYCAK
>V10RF-JYKQ01005773.1-ighv |(3691, 4000)|2.89793291531|(0.982,0.955,0.965)|1
VQCEVQLVESGGGSIQPGASLRLCCAAPGFTFSSTRMNWIRQAPGKKLEWVADIKYDGSE
KYYVDSVKGRFTISRDNAKNSLSLQMNSLRAEDTAVYYCVR
>V11RF-JYKQ01005773.1-ighv |(11326, 11632)|2.97550011724|(0.989,1.000,0.987)|1
CAEVQLVQSGAEVKRPGESLRISCKTSGYSFTSNWISWVRQMPGKGLEWMGMIDPSDSDT
RYSPSFQGQVTISADKSISTTYLQWSSLKASDSATYYCAK
>V12RF-JYKQ01005774.1-ighv |(1635, 1941)|2.97550011724|(0.989,1.000,0.987)|1
CAEVQLVQSGAEVKRPGESLRISCKTSGYSFTSNWISWVRQMPGKGLEWMGMIDPSDSDT
RYSPSFQGQVTISADKSISTTYLQWSSLKASDSATYYCAK
>V13RF-JYKQ01005774.1-ighv |(20410, 20718)|2.85461113875|(0.995,0.915,0.972)|1
VQGGVQLVESEGNFVQPGGSLRLSCAVSGFTFSSYDLDWIRHAPGKGLEWVSGISIAGST
YYANSVKGRFAISIDNAKNTLYLQMNSLIAEDTAIYYCVSE
>V14RF-JYKQ01005774.1-ighv |(31522, 31837)|3.0|(1.000,1.000,1.000)|1
VQCEVQLVESGGGLVQPGGSLRLSCAASGFTFSNYWMNWVRQAPGKGLEWVGFIKNKADG
GTAAYAESVKGRFTISRDDSKNTLYLQMNSLKTEDTAVYYCTR
>V15RF-JYKQ01005777.1-ighv |(21925, 22238)|2.96586891211|(0.999,0.999,0.971)|1
VQCEVQLVESRGGLVQPGGSLRLSCAASGFTFSDYYMHWVRQAQGKGLEWVGLIRNKANS
YTTEYAAAVKGRFTISRDDSKNTLYLQMSSLKTEDTALYYCT
>V16RF-JYKQ01005777.1-ighv |(46860, 47174)|2.90761294488|(0.977,0.949,0.985)|1
VFSQVTLKESGPALVKPTQTLTLTCTFSGFSLSTSGMRVSWVRQPPGKALEWLARIDWDD
DKYYSTSLKSRLTISKDTSKNQVVLTMTNMDPVDTATYYCARG
>V17RF-JYKQ01005784.1-ighv |(1524, 1833)|3.0|(1.000,1.000,1.000)|1
VQCEVQLVESGGGLIQPGGSLRLSCAASGFTFSSYYMYWIRQAPGKGLEWVSAINTGGGS
TWYADSVKGRFTISRENAKNTLYLQMNSLRAEDTAVYYCAK
>V18RF-JYKQ01005787.1-ighv |(1654, 1969)|3.0|(1.000,1.000,1.000)|1
VQCEVQLVESGGGLVQPGGSLRLSCAASGFTFSDHYMDWVRQAPGKGPEWVGFIRNKARG
GTAEYAASVKGRFTISRDDSKNVTYLQMSSLKTEDTAVYYCTT
>V19RF-JYKQ01005787.1-ighv |(14728, 15050)|2.60812577899|(0.980,0.892,0.841)|1
VLSQVTLKESGPALVKPTQTLTLTCTVSGFSLTTSGVGVSWIRQAPGKALEWLAHIYWTD
SKYYSPSLKSRLTISKDTSKNQVVLTITNTDPVDTATYYCARGAQ
>V20RF-JYKQ01005788.1-ighv |(4951, 5260)|2.97639727933|(0.999,1.000,0.979)|1
VLSQVQLQESGPGLVKPSETLSLTCAVSGGSISSYWWGWIRQPPGKGLEWIGIIYGSGGS
NYLNPSLKSRVTLSVDTSKNQFSLKLSSVTAADTAVYYCAR
>V21RF-JYKQ01005789.1-ighv |(14344, 14653)|3.0|(1.000,1.000,1.000)|1
VQCEVQLVESGGGLVQPGGSLRLSCAASGFTFSSYGMHWARQAPGKGLEWVSAINNGGGS
TWYADSVKGRFTISRENAKNTLYLQMNSLRAEDTAVYYCAK
>V22RF-JYKQ01029804.1-trbv |(8296, 8587)|2.21561749105|(0.828,0.662,0.830)|1
PEVTQIPSHQVTQMGQEVILQCVPIPNHLYFYWYRQILGQKVEFLVIFFNNNISEKSEIF
DDRFSVERPDGSNFTLKIKSTKLEDSAMYFCASSE
>V23RF-JYKQ01029805.1-trbv |(2386, 2683)|2.85397526728|(0.994,0.988,0.904)|1
SLDTAVSQTPKYLVTQTGKNEYLKCEQNLGHDTMYWYKQDSKKLLNIMFSYNNKQLIINE
TVPNRISPDSPDKAHLNLHITSLELGDSAVYFCASSQ
>V24RF-JYKQ01029805.1-trbv |(7011, 7308)|2.9929000027|(1.000,0.996,0.997)|1
PIDTGITQTPKHLVMGMTNKKSLKCEQHMGHRAVYWYKQKAKKPPEIMFMYNYETLSINE
SVPSRFSPECSKSSLLYLHLRALQPEDSALYLCASSQ
>V25RF-JYKQ01029807.1-trbv |(1955, 2255)|2.53437564642|(0.981,0.991,0.752)|1
HTEPEVTQTPSHQVTQMGQEVILRCVPISNHLYFYWYRQILGQKVEFLVSFYNGKISEQS
EIFDDRFSVGRSDGVHFTLKIKSTKLEDSAMYFCASSE
>V26RF-JYKQ01029807.1-trbv |(9551, 9848)|2.02694363934|(0.992,0.993,0.563)|1
SLDTAVPQTPKYLVTQTGKEESVKCEQNLGHDAMYWYKQDSKKLLKIMFSYNNKQLFINE
TVSNRFSPDSPDKARLILHIKSLELGDSAVYFCASSQ
>V27RF-JYKQ01029807.1-trbv |(18088, 18388)|2.84902658657|(0.985,0.991,0.901)|1
HTEPEVTQTPSHQVTQMGQEVILRCVPISNHFYFYWYRQILGQKVEFLVSFVNDEISDKS
EMFDDRFSVERPDGSNFTLKIKSTKLEDSAMYFCASSE
>V28RF-JYKQ01029807.1-trbv |(28941, 29238)|3.0|(1.000,1.000,1.000)|1
PTDTGVTQTPKHLVMGMTNKKSLKCEQHLGHNAMYWYKQKAKKPPELMFVYQYEKLSINE
SVPSRFSPECSKSSLLYLHLQALQPEDSALYLCASSQ
>V29RF-JYKQ01029807.1-trbv |(39844, 40134)|2.93664403777|(0.978,0.973,0.986)|1
EAGVTQTPRSLIKMRGQQVTLSCSPISGHRSVSWYQQTPGQGLQFLFEYFSETQREKGKF
PSRFSGRQFSNSRSEMNVSTLELEDSALYLCASSL
>V30RF-JYKQ01029809.1-trbv |(772, 1069)|2.9969280013|(0.997,1.000,1.000)|1
PANADVTQSPKFQILKTGQSMTLQCAQDMNHNSMYWYQQDPGMGLRLIHYSATEDTTDPG
EVPDGYSVSRLNKKEFLLKLESAAPSQTSVYFCASSE
>V31RF-JYKQ01029809.1-trbv |(15370, 15683)|2.98121230726|(0.999,0.998,0.985)|1
SLDTAVSQTPKYLVTQTGKNESLKCEQNLGHDTMYWYKQDSKKLLKIMFSYNNKEPILNE
TVPNRFSPKSPDKAHLNLHIKSVELGDSAVYFCASSQDIALQ
>V32RF-JYKQ01029809.1-trbv |(18791, 19104)|2.90830128432|(0.975,0.980,0.955)|1
PMDTGVTQTPRHLVMGMTNKKSLKCEQHLGHNAMYWYKQKARKPPELMFIYNFKEPAENN
SVPSRFVPECPDSSLFYLHLHALQPEDSALYLCASSQDTALQ
>V33RF-JYKQ01029809.1-trbv |(33264, 33561)|3.0|(1.000,1.000,1.000)|1
PVNAGVTQTPKFQILKTGQNMTLKCAQDMNHNYMYWYRQDPGMGLRLIHYSAGEGSTEKG
EVPDGYNASRLNPQNFLLRLESAAPSQTSMYFCASSE
>V34RF-JYKQ01029809.1-trbv |(37007, 37307)|2.99899600001|(1.000,0.999,1.000)|1
HTGAGVSQSPRNKVTEEGKDVVLRCDPISGHTALYWYRQSLGKGLEFLIYFQGNDAPDKS
GLPSGRFSAERTEGSVSTLKIQRTEQGDSAVYLCASSL
>V35RF-JYKQ01029811.1-trbv |(568, 868)|2.99294800078|(0.998,1.000,0.995)|1
HTGAGVSQFPSNKVTEKGKDVALRCDPISGHAVLYWYRQNLGQGLEFLIYFQGTGAVDDS
GLRSDRFSATRPEGSVSTLKIRHTEQGDSATYFCASSL
>V36RF-JYKQ01029811.1-trbv |(5612, 5908)|2.92463012727|(0.999,0.941,0.998)|1
PVDTGVTQSPTHLIKTRGQQVTLRCSPISGHTSVSWYQQAPGQGPQFIFEYANELRTSEG
NFPHRFSGRQFRDYHSEMNVSALELGDSALYLCASSL
>V37RF-JYKQ01029811.1-trbv |(8288, 8584)|2.99799600001|(0.999,1.000,0.999)|1
SVDSGVTQTPKHLITAIGQQVTLRCSPRSGDLSVYWYQQSLGQGLQFLVQYYNGEEREKG
NILERFSAQQFPDLHSELNLSSLELGDSALYFCASSL
>V38RF-JYKQ01029811.1-trbv |(16284, 16581)|1.89924940231|(0.859,0.512,0.931)|1
HRDAEIIQSPRHKITETGRKVTLTCHQTWNHNNMFWYRQDLGHGLRLIHYSYGVPDTNEG
EVPDGYSVSRSNKEDFPLTVESAASSQTSVYFCASSE
>V39RF-JYKQ01041707.1-ighv |(10254, 10563)|3.0|(1.000,1.000,1.000)|1
AHSQVQLVQSGPEVKQPGASVKVSCKASGYSFTTYGMNWVRQAPGQGLEWMGWMNTYTGN
PTYAQGFTERFVFSMDTSVSTVYLQISSLKAEDTAMYYCAR
>V40RF-JYKQ01041713.1-ighv |(30683, 30998)|3.0|(1.000,1.000,1.000)|1
VQCEVQLVESGGGLVQPGGSLRLSCAASGFTFSSSAMHWVRQASGKGLEWVGYIRSKSNN
YATQYAASVKGRFTISRDDSKNTLYLQMSSLKTEDTAMYYCTT
>V41RF-JYKQ01041713.1-ighv |(41631, 41955)|2.94111131168|(0.966,0.996,0.984)|1
VQCEVQLVESGGGLVQPGESLRLSCAASGFTFSDYYMDWVCQAQGRGWSGLATQTLFLNK
ANSYTTEYAASVKGRFTISRDDSENTLYLQTSSMNTEDTAVYYCAR
>V42RF-JYKQ01041713.1-ighv |(51469, 51784)|2.99899600001|(1.000,1.000,0.999)|1
VQCEVQLVESGGGLVQPGGSLRLSCAASGFTFSDHYMQWVRQAPGKGLEWVGFIRSKAYG
GTAEYAASVKGRFTISRDDSKSIASLQMSSLKTEDTAVYYCAR
>V43RF-JYKQ01041713.1-ighv |(65843, 66152)|2.83763676403|(0.987,0.889,1.000)|1
VQCEVQLVESGGGLVKPGGSLRLSCAASGFTFGDYAMSRVRQAPGKGLEWVSSISNTGKT
IYYADSVKGRFTISRDNAKNSLSLQMSSLRAEDTAVYYCAR
>V44RF-JYKQ01041713.1-ighv |(71051, 71357)|3.0|(1.000,1.000,1.000)|1
VQCEVQLVESGGGLVQPGGSLRLSCAASGFTFSSYGMNWVRQAPGKGLEWVSYISSGGST
YYADSVKGRFTISRDNSKNTLSLQMNSLRAEDTAVYYCAG
>V45RF-JYKQ01041718.1-ighv |(4152, 4461)|2.97870083945|(0.999,1.000,0.981)|1
AHSQVQLVQSGAEIKQPGASVKLSCKASGYTFTSYYMHWVRQAPGQGLEWIGLISPYNGN
KGYAQNFQGRVTITADTSTSTGYMELSSLRSEDTAVYYCTR
>V46RF-JYKQ01041718.1-ighv |(11509, 11818)|2.98632422844|(1.000,0.987,1.000)|1
VQGEVQLVESRGGLAKPGGSLRLSCAASGFTFSGYNMYWVRQASGKGLEWVSGISYTGGS
TWYADSVKGRFTISRENAKNTLYLQMNSLRAEDTAVYYCAR
>V47RF-JYKQ01041718.1-ighv |(23132, 23439)|1.96430458325|(0.897,0.992,0.529)|1
VQCEVQLVESGGGLVQPGGSLRLSGAASAFTFSDDYMEWVRQAPGKGLEWVGQINPNGGT
TFLMDSVKGRFTISRDNAKNTLYLQINSLKIEDTAVYYCT
>V48RF-JYKQ01041718.1-ighv |(32027, 32336)|2.99899600001|(1.000,1.000,0.999)|1
VQCEVQLVESGGGLVKPGASLRLSCAASGFTFGDYTMHWVRQAPGKGLEWVSYISSASSY
IHYADSVKGRFTISRDNAKNSLYLQMNSLKTEDTAVYYCTR
>V49RF-JYKQ01041720.1-ighv |(764, 1078)|2.15315331827|(0.944,0.923,0.624)|1
VLSQVTLKESGPALVKPTQTLTLTCTFSGFSLTTSGMGVGWIRQPPGKALEWLANIYWDD
GKYYSPSLKSRLTISKDTSRKQVVLTMTNMDPVDTATYYCARG
>V50RF-JYKQ01051981.1-igkv |(559, 859)|3.0|(1.000,1.000,1.000)|1
ARCDIQMTQSPSSLSASVGDRVTITCQASQGISSWLAWYQQKPGKAPKLLLYKASGLQSG
VPSRFSGSGSGTEFTLTISSLQPEDFATYYCQQFSSAL
>V51RF-JYKQ01051984.1-igkv |(153, 453)|2.04428092792|(0.992,0.567,1.000)|1
TTGEIVMTQSPATWALSPGERATLSCRASQSVSSRLAWYQQKPGQAPRLLIYGASSRATG
IPDRFSGSGSGTEFTLTISSLEPEDVGVYYCQQDYSWP
>V52RF-JYKQ01051984.1-igkv |(27105, 27405)|2.99093200206|(0.998,0.994,0.999)|1
ARCDIQMNQSPSSLSASVGDTVTITCRANQGISNNLAWYQQKPGKVPQLLIYYASSLASG
IPSRFSGSGSGTEFTLTISSLQPEDFAAYYCLQHNSYP
>V53RF-JYKQ01051985.1-igkv |(4005, 4303)|2.54382230064|(0.992,0.958,0.773)|1
TTVEIVMTQSPATLSLSPGERATLSCRASQSVSSYLSWYQQKPGQAPRILIYGASSRATG
IPDRFSGSGSGTDFTLTISSLEPEDVGVYFCPQSSNW
>V54RF-JYKQ01052451.1-igkv |(138345, 138660)|2.8568400105|(0.951,0.957,0.949)|1
TSGDILLTQTPLSLPVTTGEPASISCRSSQSLLHSNENTYLHWYLQKPGQSPQLLIYEVS
NRASGVPERLSGSGSDTDFTLKINLVEAEDVGVYYCMQTTQWP
>V55RF-JYKQ01052451.1-igkv |(143240, 143558)|3.0|(1.000,1.000,1.000)|1
SSGDIVMTQTPLSLPVTPGEPASISCRSSQSLLDSEDGNTYLDWYLQKPGQSPQLLIYEV
SNRASGVPDRFSGSGSDTDFTLKISRVEAEDVGVYYCMQALQNP
>V56RF-JYKQ01054915.1-trav |(5555, 5858)|2.09559446888|(0.797,0.681,0.704)|1
MCLILVTTGQNIDQPTEMTAMEGAIVQINCTYQTSGFNGLSWYQQHDGEAPTLLSYNVLD
GLEEKGRFSSFLSNSKRYSYLLLKELQMKDSASYLCAVR
>V57RF-JYKQ01054925.1-trav |(5041, 5338)|2.99289600501|(0.999,0.994,1.000)|1
GLRAQLVTQPEDQVTVAEGNPLTVKCTYSVSGNPYLFWYVQYPNQGLQFLLKYITGDNLV
KGSYGFEAEFNKSQTSFHLKKPSALVSDSALYFCAVR
>V58RF-JYKQ01054933.1-trav |(11630, 11920)|3.0|(1.000,1.000,1.000)|1
MSRGEDVEQSLFLSVREGDISVINCTYTDSSSTYLYWYKQEPGAGLQLLIYILSNMDLKR
DQRVTVLLNKKDKHLSLRIADTQTEDSAIYFCAES
>V59RF-JYKQ01054940.1-trav |(18103, 18397)|3.0|(1.000,1.000,1.000)|1
GINGDSVVQTEGQVLLSEGNSLIVNCSYESTQYPSLFWYVQYPGEGPQLLLKAMKDNDKE
SNKGFEATYRKETTSFHLEKDSVQESDSAVYFCALS
>V60RF-JYKQ01054940.1-trav |(31345, 31638)|3.0|(1.000,1.000,1.000)|1
GSGKNQVEQSPQSLIILEGKNCTLQCNYTVSPFNNLRWYKQDTGKGPISLTIMTFSENTK
SNGRYIATLDADTKQSSLHITAAQLSDSASYICVVS
>V61RF-JYKQ01054940.1-trav |(46970, 47276)|2.99696400065|(1.000,1.000,0.997)|1
VWSQQKEVEQDPGPFSVPEGATVTFNCTYSNSASQSFFWYRQDSRKEPKLLMSAYSSGNE
DGRFTAQLNRASQYISLLIRDSQLSDSATYLCAVYTQCSP
>V62RF-JYKQ01054940.1-trav |(52430, 52727)|2.99596800026|(1.000,0.998,0.998)|1
GTRAQSVTQLDSQVSVSEGAPVLLRCNYSSSVPPYLFWYVQYPNQGLQLLLKYTSGTTLV
KGINGFEAEFKKSETSFHLRKASAHVSDAAEYFCAVS
>V63RF-JYKQ01054942.1-trav |(16188, 16478)|2.99798400013|(1.000,0.998,1.000)|1
VNGENVEQHPSILSVQEGDSSVIKCTYSDSASNYFPWYKQELGKEPQFIIDIRSNAHEKK
DQRITVLLNKTAKHFSLHITETQPGDSAVYFCAAS
>V64RF-JYKQ01054942.1-trav |(38704, 38992)|3.0|(1.000,1.000,1.000)|1
VWSQQKVEQNSGPLSVPEGAIASLNCTYSDRGSQSFFWYRQYSGQSPELLMSTYSSGDKE
DGRFTAQLNRASQYVSLLIRDSQPSDSATYLCAV
>V65RF-JYKQ01054942.1-trav |(45190, 45487)|2.95840068997|(0.988,0.972,1.000)|1
GTKAQSVTQLDSQVSVSEGVPVLLRCNYSSSFPPTLFWYVQYPNQGLQLLLKYTSGTTLV
KGINGFEAEFKKSETSFHLTKASAHVSDAAEYFCAVN
>V66RF-JYKQ01054942.1-trav |(64627, 64920)|2.99385601037|(1.000,1.000,0.994)|1
VSRGESVGLHLPTVSVQEGDNSVINCTYSDSASDYFLWYKQESGKGPQSIIDIRSNMAKR
QGQRLTVFLNKTMKHLSLQIAATEPGDSAVYFCAEN
>V67RF-JYKQ01054942.1-trav |(70517, 70818)|2.90590958026|(1.000,1.000,0.927)|1
SGIAQKITQTQPAMFVQEKEAVTLDCTYDTSDQSYGLFWYKQPSSGEMIFLILQMSYDKQ
NATEGRYSLNFQKARKSVNLVISASQVGDSAMYFCAMR
>V68RF-JYKQ01054942.1-trav |(88856, 89150)|3.0|(1.000,1.000,1.000)|1
RTRGDSVTQMEGPVTLSERAFLTINCTYTATGYPSLFWYVQYPGEGPQLLLKATKTDEKG
SNKGFEATYRKETTSFHLKKDSVQESDSAVYFCALS
>V69RF-JYKQ01054942.1-trav |(113522, 113815)|2.99796800026|(0.998,1.000,1.000)|1
VWSQQKEVEQNPGPLSVPEGATASLNCTYSNSAFQYFMWYRQYSRKGPQLLIYIYSSGNK
EDGRFTAQVDKSSKYISLFIRDSQPNDSATYFCAMS
>V70RF-JYKQ01054953.1-trav |(3497, 3784)|3.0|(1.000,1.000,1.000)|1
VNSQQGEEDPQTLSIQEGENATMNCSYKTSINNLQWYRQDSGRSLVQLILIRSNEREKNS
GRLRVTLDTSKKSSSLLITASRAADTASYFCATD
>V71RF-JYKQ01054957.1-trav |(3986, 4277)|2.99899600001|(1.000,0.999,1.000)|1
RTNGDSVTQTEGPVTLPERAALTLNCTYQTSYSAFIFWYVQYPNKEPELLLKSSENQETN
SRGFQASHVKSDSSFHLEKPSVQLSDSAVYYCVLR
>V72RF-JYKQ01054957.1-trav |(7206, 7509)|2.98209640489|(0.999,1.000,0.984)|1
SSMAQKVTQAQTEISVVEKEDVTLDCVYETRDTTYYLFWYKQPPSGELVFLIRQNSFDEQ
NEINGRYYSKFQKSTSSFNLTITASQVVDSAVYFCALNE
>V73RF-JYKQ01054957.1-trav |(42945, 43232)|2.98880001921|(0.999,0.992,0.998)|1
LSGEDQVTQSPEALSLQEGDSSSLNCSYTVSGLRGLLWYRQDPGKGPEFLFILYSAGEEK
EKERLKATLTKKESFLHITGPKPEDSATYLCAVQ
>V74RF-JYKQ01054958.1-trav |(3110, 3409)|2.16317994378|(0.897,0.605,0.973)|1
VSSKQEVKQIPAALSVPEGDNLVLNCSFTDSAIYNLQWFRQDPGKGLTSLLLIQSSQREQ
TSGRLNASLDKSSGHSTLYITASQPSDSATYLCAVRHS
>V75RF-JYKQ01062966.1-iglv |(12021, 12331)|2.99696400065|(1.000,0.997,1.000)|1
SWAEVVFTQPHSVSGSPGQTVTISCTRSSGSIDSSYVYWYQQRPGSAPTTVIYSDDQRPS
GVPDRFSGSIDSSSNSASLTISGLKSEDEADYYCQSYDSSS
>V76RF-JYKQ01067073.1-ighv |(701, 1007)|2.88157209623|(0.937,0.997,0.965)|1
VRCEVQRVESGGGLVQPGGSLRLSCAASGFTISSSWMNWDFQAPGKGLECVSHIISGGST
DYPDSFKGRFTISRDNTKNTLYVQKNSLRAEDMAVYYCAR
>V77RF-JYKQ01067101.1-ighv |(5042, 5351)|3.0|(1.000,1.000,1.000)|1
TQSQVQLVQSGAEVKKPGASVKLSCKASGYTFTSYGINWVRQAPGQGLEWMGWINPSNGN
TGYAQKFQGRVTMTRDTSTSTAYMELNSLRSDDTAVYYCAR
>V78RF-JYKQ01067101.1-ighv |(30146, 30461)|2.98764005313|(1.000,0.991,0.997)|1
VLSQVQLQESGPGVVKPSETLSLTCAVSGASISSGYYYWSWIRQPPGKGLEWIGGIYSNS
GSTNYNPSLKSRVTISKDTSKNQFSLKLSSVTAADTAVYYCAR
>V79RF-JYKQ01079834.1-igkv |(1757, 2043)|2.76508785087|(0.990,0.868,0.967)|1
IVLTQSPATLALSPGEGATLSCRASQSVSRYSSWYQQKPGQAPRLLIYGASSRATGIPAR
FSGSGSGTDFTLTISSLEPEDVAVYFCQQSNNW
>V80RF-JYKQ01086555.1-ighv |(11851, 12160)|2.98270402421|(0.995,0.988,1.000)|1
VQCEVQLVESGGGVVQPGGSLRLLCAASGFTFDDYAMHWVRQAPGKGLEWVSAISWDGDS
TYYADSVKGRFTISRDNAKNSLYLQMNSLRAEDTAVYYCAR
>V81RF-JYKQ01114545.1-iglv |(3565, 3871)|3.0|(1.000,1.000,1.000)|1
DSETVVTQEPSLSVSSGGTVTLTCGLSSGSVSTSNYPSWYQQTPGQAPRTLIYRTNTRPS
GVPDRFSGSILGNKAALTITGAQADDESDYYCMLYMGSGI
>V82RF-JYKQ01131089.1-trbv |(3084, 3375)|2.53595909396|(0.963,0.809,0.881)|1
AGVAQSPRYKITEKSQAVAFWCDPISGHATLYWYRQILGQGPELLVRFQNEDVVDDSQLP
KDRFSAERLKGVDSTLKIQPAELGDSAVYLCASSL
>V83RF-JYKQ01131090.1-trbv |(8544, 8841)|2.83824910116|(0.971,0.895,0.998)|1
HRDAEITQSPRYKVTETGRKVTLTCHQTWNHNNMFWYRQDLGHGLRLIYYSAGASIIDKG
EVPDGYVVSRSKTEDFPLTLESATRSQTSVYFCASSE
>V84RF-JYKQ01131090.1-trbv |(17704, 17995)|2.43424146937|(0.917,0.891,0.743)|1
AGVVQSPRYKVIEKSQAVTFWCNPVSGHATLYWYRQILGQGLELLVQFRNNDVVDDSQLP
KDRFSAERLKGVNSTLKIQPAELGDSAVYLCASSL
>V85RF-JYKQ01131090.1-trbv |(36297, 36594)|3.0|(1.000,1.000,1.000)|1
PVNAGVTQTPKFQILKTGQSMTLQCAQDMNHDCMYWYRQDPGMGLRLIHYSVGEGSTDKG
EVPDGYNVTRSNTEDFPLRLESAAPSQTSVYFCASSY
>V86RF-JYKQ01131090.1-trbv |(40488, 40788)|2.98548011776|(1.000,0.989,0.997)|1
HTGAGVSQSPRYKVTKRGQDVALRCDPISGHDYLYWYQQAPGQGPAFLTYFQNDAQRDKS
GLPNDRFSAEMPEGSVSTLKIQRTEQGDSAVYLCASSL
>V87RF-JYKQ01131090.1-trbv |(48415, 48705)|2.89755295615|(0.995,0.970,0.945)|1
DAGVTQSPTHLIKTRGQQVTLRCSPISGHTSVYWYQQALGQGLQFILWYDEEEQRDRGTF
PHRFSGRQFPNYSSELNVNASEMGDSALYLCASSL
>V88RF-JYKQ01131090.1-trbv |(54020, 54340)|2.55920145704|(0.929,0.947,0.775)|1
NAGVTQTPKFQVLKTGQSMTLQCAQDMSHNSSYWYGQDPGMGLRLIRYSAAAGVTDKGEV
PSGYNVSRLNTEDFRLRLESAAPSQTSVYFCASSYSPTLQGRLLS
>V89RF-JYKQ01131090.1-trbv |(60130, 60430)|2.99696400065|(1.000,0.997,1.000)|1
HTGAGVSQSPRYKVTKRGQDVALRCDPISGHVALYWYRRTLGQGPEFLTYFQNDAQPDKS
GLPSDRFSAERPEGSVSTLKIQRTEQGDAAVYLCASSL
>V90RF-JYKQ01131091.1-trbv |(1114, 1410)|2.99289600501|(0.999,0.994,1.000)|1
SVDGGVTQSPRHLIKTTGQQVTLRCSPISGHTSVSWYQQALGQGPQFIFEYYEEKERERG
NFPDRFSGHQFPNYSSELNVNALEAGDSALYLCASSL
>V91RF-JYKQ01131092.1-trbv |(9, 305)|2.99289600501|(0.999,0.994,1.000)|1
SVDGGVTQSPRHLIKTTGQQVTLRCSPISGHTSVSWYQQALGQGPQFIFEYYEEKERERG
NFPDRFSGHQFPNYSSELNVNALEAGDSALYLCASSL
>V92RF-JYKQ01131092.1-trbv |(3324, 3621)|2.99396400065|(0.999,0.999,0.996)|1
LVNAGVTQTQKFQVLKTGQSMTVQCAQDMNHDCMYWYRQDPGMGLRLIHYSDAAGTTDKR
EVPSGYNVSRLNIEDFPLRLESAAPSQTSVYICASSY
>V93RF-JYKQ01131093.1-trbv |(3513, 3804)|2.13628962396|(0.977,0.939,0.622)|1
ARVSQSPRYKVTKRGQDVALRCDPISGHDYLYWYQQVLEQGPELLTYFSYGAQQDKSGLP
GDRFSAERPEGSVSTLQIQHTQQGDSAVYPCASSL
>V94RF-JYKQ01131093.1-trbv |(13830, 14126)|2.86463755605|(0.979,0.934,0.961)|1
SVDAGVTQSPTHLIRKRGQQVTLRCSPISGHNTVSWYKRALGQGPQFIFQYYEKEERERG
NFPGRFSGHQFPNYSSELNVNASEMGDSALYLCASSL
>V95RF-JYKQ01131093.1-trbv |(22892, 23189)|3.0|(1.000,1.000,1.000)|1
PGNAGVTQTPKFQILKTGQSMTLQCAQDMNHNYMSWYRQDPGVGLRLIHYSVGAGVTDKG
EVSNGYNVSRLNTEDFPLSLESAASSQTSVYFCASSY
>V96RF-JYKQ01131094.1-trbv |(5376, 5676)|2.99899600001|(1.000,0.999,1.000)|1
HTGAGVSQFPRYRVTKRGQDVTLRCDPISGHEYLYWYQQAPGQGPELLTYFQNDAQLDKS
GLPSDRFSAERTEGSVSTLKIQRTEQGDSAVYLCASSL
>V97RF-JYKQ01131094.1-trbv |(13819, 14115)|2.994900005|(1.000,0.995,1.000)|1
PVDTGVTQSPTHLIKTRGQQVILRCSPISGHSSVYWYQQALGQGPQFIFEYYEKEERGRG
NFPDRFSGRQFPNYSSELNVSALLLGDSALYLCASSL
>V98RF-JYKQ01131094.1-trbv |(21287, 21594)|2.97258408012|(0.987,0.997,0.989)|1
PGNADVTQTPKFQVLKTGQSLTLQCAQDMNHNYMYWYRQDPGMGLRLIHYSVGAGITDKG
EVPNGYNVFRLNTEDFPLRLESAALSQTSVYFCASSDTTV
>V99RF-JYKQ01131095.1-trbv |(9158, 9454)|2.99593600205|(1.000,0.996,1.000)|1
PVDTGVTQSPTHLIKMRGQQVTLRCSPISGHSSVSWYQQALGQGPQFIFQYYEKEERGRG
NFPDRFSGRQFPNYSSELNVSALLLGDSALYLCASSL
>V100RF-JYKQ01131096.1-trbv |(2555, 2846)|2.99696400065|(1.000,1.000,0.997)|1
NAGVTQTPKFQVLKTGQSMIVQCAQDMKHDYMFWYRQDPGMGLRLIYYSVTAGITTKGEV
PNGYNVSRINTEDFLLRLESAAPSQTSVYFCASSY
>V101RF-JYKQ01131098.1-trbv |(4345, 4645)|2.991900005|(0.999,0.994,0.999)|1
HTGAGVSQSPRYKVIKKGQDVALRCDPISGHAGLYWYQQALGQGPEFLTYFNYQAQPDKS
GLPNDRFSAERHEGSVSTLTIQRTEQQDSAVYLCASSL
>V102RF-JYKQ01131101.1-trbv |(106, 402)|2.61794442369|(0.956,0.981,0.789)|1
PVDAGVAQSPTHLIKTRGQQVTLRCSPISGHNTVYWYQQALGQGPQLIFQYYRGEDRGRG
NFPDRFSGHQFPNYSSELNVSALLLGDSALYLCASSL
>V103RF-JYKQ01131101.1-trbv |(9053, 9353)|2.99899600001|(1.000,0.999,1.000)|1
HTDARVSQDPRHKITKTGQNVSFKCVPISEHNRLYWYRQTLGQGPEFLTYFQNEAQQDRS
GLFSDRFSAERPEGSISTLMIQHTEQGDSAVYLCASSL
>V104RF-JYKQ01131101.1-trbv |(23980, 24277)|2.99899600001|(1.000,1.000,0.999)|1
HMDAGITQSPRHKITETGTPVTLRCHQTENHRYMYWYRQDLGRGLRLIHYSYGVEDTDKV
EVSDGYSVSRSKTEDFLLTLESATRSQTSVYFCASSE
>V105RF-JYKQ01131102.1-trbv |(2948, 3248)|2.99899200002|(0.999,1.000,1.000)|1
HTDAGVIQSPRHKVTEMGKEVTLRCEPISGHTYLFWYRQTMMQGLEFLIYFNNKDPTDDS
GMPKDRFSAKMPNASFSTLKIQPSEPRDSAVYFCASSL
>V106RF-JYKQ01131102.1-trbv |(18186, 18486)|2.97039727933|(0.997,0.998,0.977)|1
LIDAGVTQTPRHKVTEMGQEVTMRCQPILGHNTVFWYRQTMMQGLELLVYLRNKASLDDS
GMPKDRFSAEMPNASLATLKIQPSEPRDSAVYLCASGL
>V107RF-JYKQ01131102.1-trbv |(25139, 25439)|2.8542125406|(0.995,1.000,0.897)|1
HTEAGVTQFPSHRVIEKGQTVTLRCDPISGHDYLYWYRRVMGKEIKFLISFMRVSTQDES
GMPNKRFSAERTGGTYSTLKVQPAELEDSGVYFCASSQ
>V108RF-JYKQ01131102.1-trbv |(30162, 30459)|1.62356777694|(0.919,0.579,0.688)|1
HGDVMVIQNPRYQVTQLEKPVTLSCSQNLNHKVMYWYQQKPSQAPKLLFHYYDKDFNNEA
DTPDNFQSRRPNTSFCFLDIRSPGLEDAAVYLCASSK
>V109RF-JYKQ01131102.1-trbv |(35121, 35421)|2.89941351455|(0.996,1.000,0.924)|1
SPGEEVTQTPKHLVKGEGQKAKLYCDPIKGHSYVFWYQQVLRKEFKFLISFQNKNVFDET
GMPKERFSAKCHANSPCSLEIQATKLKDSAVYFCASSQ
>V110RF-JYKQ01131103.1-trbv |(16377, 16677)|1.8839788462|(0.804,0.558,0.749)|1
LSNAGITQNPRHLVRRRGQEARLRCSPTKEHSHVYWYRQLPEEGLKFMVYLQKEKIIDES
GMPKEQFSAEFPKEGPSILRIQQAEQEDSAAYFCASSP
>V111RF-JYKQ01131104.1-trbv |(2283, 2580)|2.98672803289|(0.999,0.997,0.991)|1
TVDGGITQSPKYVFRKEGQNVTLSCEQNLNHNAMYWYRQDPGQGLRLIYYSQIVNDIQKG
DIAEGYSVSRERKQSFPLTVTSAQRNPTAFYLCASSI
>V112RF-JYKQ01131104.1-trbv |(20313, 20613)|2.92077645736|(0.982,0.973,0.967)|1
STDTKVTQRPRLLVKANGQKAKMDCVPVKGHSYVYWYRKKLDEELKFLVYFQNEEIIQKA
EIINERFSAQCPQNSPCTLEIQSTESGDAALYYCASSK
>V113RF-JYKQ01131105.1-trbv |(770, 1075)|2.99398000014|(0.999,0.997,0.998)|1
SFHAEVTQTPGYLVKGKGQKTKMDCTPEKGHTYVYWYQQNQNKEFTFLISFQDEQVLQET
ELHKKRFSSQCRKNLPCSLEIPSSEPGDTALYLCASSQST
>V114RF-JYKQ01131107.1-trbv |(8150, 8448)|2.93379033782|(0.996,0.999,0.948)|1
SMDADVTQTPRNKIAKTGKRIMLECSQTKGHDQMYWYRQDPGLGLRLIYYSFDVQDINKG
EISDGYSVSRQEQAKFSLSLESATPNQTALYFCATSD
>V115RF-JYKQ01131107.1-trbv |(16640, 16937)|2.84974282068|(0.987,1.000,0.896)|1
LMEADIYQNPRHRVIGTGKKITLECSQTMGHDKMYWYQQDPGMELHLIHYSYGVNSTERG
DYSSKSTVSRLRIEHFPLTLESTSPSHTSQYLCASSE
>V116RF-JYKQ01131110.1-trbv |(21384, 21680)|2.86222261145|(0.993,1.000,0.902)|1
PLEAQVTQNPRYLITVTGKKLTVTCSQNMNHEYMSWYRQDPGLGLRQIYYSSNVELVDKG
DIPEGYNVSRKEKTTFPLILESPSPSQTSLYFCASSY
>V117RF-JYKQ01131110.1-trbv |(26751, 27058)|2.98580401921|(0.993,1.000,0.993)|1
LVDVKVTQSSRYLIKRTGEKVFLECVQDMDHERMFWYRQDPGLGLRLIYFSYDVKLNEKG
DIPEGYSVSREKKERFSLILGSTSTNQTSMYLCASSLSTA
>V118RF-JYKQ01131111.1-trbv |(5907, 6210)|2.99296000066|(0.997,0.996,1.000)|1
SVFSAVISQKPSRDVCQRGTSVTFQCQVDSQVTMMFWYRQRPGQSMTLIATANQGSEATY
ESGFVIDKFPISRPNLTFSTLTVSNTSPEDSSIYLCSVE
>V119RF-JYKQ01135385.1-trdv |(1626, 1927)|2.89431815075|(0.996,0.998,0.922)|1
SGMAQTVTQSQPEVSVREAETVTLSCTYDTSESNYYLFWYKQPPSRQMILIIRQEAYKQQ
NATENRFSVNFQKAAKSFSLKISDSQLGDAAMYFCAFM
>V120RF-JYKQ01135388.1-trav |(4501, 4803)|2.99899600001|(1.000,0.999,1.000)|1
SGMAQTVTQSQPEMSVQEAETVTLSCTYDTSESNYYLFWYKQPPSRQMILIIRQEAYKQQ
NATENRFSVNFQKATKSFSLKISDSQLGDAAMYFCAYRS
>V121RF-JYKQ01135389.1-trav |(2804, 3092)|3.0|(1.000,1.000,1.000)|1
LSGELKVGQNPLFLSTQEGKNYTIYCNYSTASDRLYWYRQDPGKSLESLFVLLSNGAVKQ
EGRLMASLDTKARLSSLHITAALQDLSATYFCAV
>V122RF-JYKQ01135389.1-trav |(19852, 20154)|1.52627829557|(0.530,0.458,0.780)|1
VSAAKNEVEQSPQDLTAQEGEFITINCSYSIGINSLHWLQQHPGGGIVSLFMLSSEKKKN
GRLIATINTQERHSSLHIAASQPRDSAIYICAVRHSALQ
>V123RF-JYKQ01187326.1-igkv |(1372, 1659)|2.90858683121|(0.999,0.929,1.000)|1
TVVTQSPATLSVSPGERATISCRTSQSVGSRLAWYQQKPGQAPRLLIYGASNRATGIPDR
FSGSGSGTDFTLTISSLKPEDAAVYYCQQDNDWK
>V124RF-JYKQ01187337.1-igkv |(7825, 8116)|2.99599200002|(0.998,0.999,0.999)|1
IVLTQSPTSMAVSQGERVTISCTASSSVSTSYLHWYQQKPGFPPRLLVYRTSNLASGVPA
RFSGSGSGTSYTLTISSMEAEDAANYYCQQGNSIP
>V125RF-JYKQ01245859.1-ighv |(891, 1200)|3.0|(1.000,1.000,1.000)|1
AHSQVQLVQSGAEVKKPGASVKVSCKASGYTFTDYYMHWVRQAPGQGLEWIGWINPYNGN
TKYAQKFQGRVTMTRDTSTSTAYMELSSLRSEDTAVYYCAR
>V126RF-JYKQ01245874.1-ighv |(7328, 7639)|2.98788400513|(0.997,0.992,0.999)|1
VRCEVQLVESGGGVVQPEGSLRLSCAASGFTFDDYAMHWVRQAPGKGLEWVSGISWNGDS
TYYADSVKGRFTISRDNAKNSLFLQMNRLRAEDTAVYYCAKD
>V127RF-JYKQ01245874.1-ighv |(37996, 38302)|3.0|(1.000,1.000,1.000)|1
VQCEEQLVESGGGLVQPGASLRLSCAASGFTFSSYDMHWVRQAPGKGLEWVSAISIGGGT
YYPDSVKGRFTVSRDNAKNSLYLQMNSLRAEDTAVYYCAR
>V128RF-JYKQ01245876.1-ighv |(15391, 15700)|2.97688400513|(0.990,0.992,0.995)|1
VLSQLQLQESGPGVVKPSETLSLTCAVSGGSISSYWWGWIRQPPGKGLEWIGSIYGSGGS
NYLNPSLKSRVTLSVDTSKNQFSLKLSSVTAADTAVYYCAR
>V129RF-JYKQ01245876.1-ighv |(36255, 36564)|3.0|(1.000,1.000,1.000)|1
VQCEVQLVESGGGLVQPGGSLRLSCAASGFTFSSYWMNWVRQAPGKGLEWVSRINSDGSS
TNYADSVKGRFTISRENAKNSLYLQMNSLRAEDTAVYYCTT
>V130RF-JYKQ01245880.1-ighv |(7638, 7950)|3.0|(1.000,1.000,1.000)|1
VQCEVQLVESGGGLVQPGGSLRLSCVASGFTFSDYYMHWARQAPGKGLEWVSRISSGSGS
STYYPDSVKGRFTISRDNAKNTLYLQMNSLRAEDTAVYYCAR
>V131RF-JYKQ01245881.1-ighv |(6177, 6492)|3.0|(1.000,1.000,1.000)|1
VQCEVQLVESGGGLVQPGGSLRLSCAASGFTFSDHYMDWVRQAPGKGLEWVGFIKNKADG
GTADYAASVKGRFTISRDDSKNTLYLQMNSLKTEDTAVYYCTR
>V132RF-JYKQ01245882.1-ighv |(18027, 18336)|2.9681290053|(1.000,0.988,0.982)|1
AHAQVQLVQSGAEVKQPGASVKVSCKASGYTFTSYGMNWVRQAHGQRLEWMGWINTNTGN
PTYAQGFKERFTFSMDTSISTAYLQISSLKAEDTAVYYCAR
>V133RF-JYKQ01245882.1-ighv |(35101, 35410)|2.9603881665|(0.984,0.996,0.981)|1
AHSEVQLVQSGAEVKKPGATVKISCKASGYTFTDYYLHWVRQAPGKGLEWMGRVDPEDGE
ADYAQKFQDRLTMTADTSTDTAYMELSSLRSEDTAVYYCTR
>V134RF-JYKQ01245886.1-ighv |(241, 551)|2.99798400013|(1.000,1.000,0.998)|1
FQCEVQLVESGGGLVQPGGSLRLSCVASGFTFSDHYMDWVRQAPGKGLEWVSSISTGSGS
TTLYPDSVKGRFTISRDNAKNTVYLQMNSLRAEDTAVYYCA
>V135RF-JYKQ01245888.1-ighv |(1665, 1980)|3.0|(1.000,1.000,1.000)|1
VQCEVQLVESGRGLVQPGGSLRLSCAVSGFTFSDHYVSWVRQAPGKGLEWVGFMRNKANG
GRTEYAASVKGTFTISRDDSKSIASLQMSSLKTEDTAVYYCAR
>V136RF-JYKQ01245888.1-ighv |(18543, 18855)|3.0|(1.000,1.000,1.000)|1
VLSQVQLQESGPGVVKPSETLSLTCAVSGGSISDSYYWSWIRQAPGKGLEWIGGIYGSGS
STNYNPSLKSRVTISKDTSKNQFSLKLSSVTAADTAVYYCAR
>V137RF-JYKQ01245889.1-ighv |(13016, 13325)|3.0|(1.000,1.000,1.000)|1
VQCEVQLVESGGGLAQPGGSLRLSCAASGFTFSSYGMSWVRQAPGKGLEWVSGISNTGGS
IYYADSVKGRFTISRDNSKNTLSLQMNSLRAEDTAVYYCAK
>V138RF-JYKQ01245890.1-ighv |(4928, 5237)|2.99799600001|(0.999,1.000,0.999)|1
VQCDVQLVESGGGLVKPGGSLRLSCVASGFTFSSYAMHWVRQAPGKGLEWVSVISTSGGT
TYYADSVKGRFTISRDNAKNSLFLQMNSLRAEDTAVYYCTR
>V139RF-JYKQ01245900.1-ighv |(4135, 4449)|2.28521166379|(0.981,0.660,0.982)|1
VLSQVTLKESGPALVKPTQTLTLTCTFSGFSISTTGTGVGWIRQPPGKALEWLASIYWND
SKYYSTSLKSRLTISKDTSKNQVVLTMTNMDPVDTATYYCARV
>V140RF-JYKQ01245904.1-ighv |(629, 938)|3.0|(1.000,1.000,1.000)|1
VQCEVQLVESGGGVVQPGGSLRLSCAASGFTFDDYAMGWVRQAPGKGLEWVSAISWDGDS
TGYADSVKGRFTISRDNAKNSLSLQMNSLRAEDTAVYYCAR
>V141RF-JYKQ01005004.1-igkv |(7879, 8179)|2.99899600001|(1.000,1.000,0.999)|-1
TTGETVMTQSPATLSLSPGERATLSCRASQSVGSSLAWYQQKPGQAPRLLVYYASSRATG
IPDRFSGSGSGTDFTLTISSLDPEDVGVYYCQKYNDWP
>V142RF-JYKQ01005007.1-igkv |(665, 964)|3.0|(1.000,1.000,1.000)|-1
TTGEIVMTQSPATLSLSPGERATLSCRASQSVGSYLAWYQQKPGQAPRLLIYGASSRATG
IPDRFSGSGSGTEFTLTISSLEPEDFAVYYCQQYNNWN
>V143RF-JYKQ01005012.1-igkv |(8346, 8639)|2.99696400065|(1.000,1.000,0.997)|-1
ARCDIQMTQSPSSLSASVGDRVTITCRASQGISTYLNWYQQKPGKAPKLLIYAASSLQSG
VPSRFSGSGSGTVFTLTISSLQSEDFATYYCLQYNS
>V144RF-JYKQ01005013.1-igkv |(2914, 3214)|3.0|(1.000,1.000,1.000)|-1
AKCDIQMTQSPSSLSASVGDRVTITCRASQGISSYLAWYQQKPGKAPKPLIYYASNLESG
VPSRFSGSGSGTDFTLTISSLQPEDFATYYCQQYNSAP
>V145RF-JYKQ01005014.1-igkv |(6504, 6804)|3.0|(1.000,1.000,1.000)|-1
ARCDIQMTQSPSSLSASAGDRVTITCRASQGISSYLAWYQQKPGKAPKLLIYDASNLQSG
VPSRFSGSGSGTEFTLTISSLQPEDFAVYYCQQRNSYP
>V146RF-JYKQ01005017.1-igkv |(2324, 2623)|2.45210916408|(0.776,0.904,0.871)|-1
IVLTQSPATLSLSPGETATLSCRASESVGSYLAWYQQKPGQAPKLLVHSAYFRATGIPDR
FSGSGSRTEFTLTISSLEPEDVGVYHCQQYHDWSPTVI
>V147RF-JYKQ01005018.1-igkv |(609, 897)|2.99899600001|(1.000,0.999,1.000)|-1
IVLTQSPGTLSLSPGERATLSCRASQSVSSSLAWYQQKPGQVPRLLIYGASSRATGIPDR
FSGSGSGTEFTLTISSLEPEDFAVYYCQQYSNWP
>V148RF-JYKQ01005018.1-igkv |(13195, 13495)|3.0|(1.000,1.000,1.000)|-1
ARCDIQMTQSPSSLSASVGDRVTITCRASQGISTYLNWYQQKPGKAPKLLIYAASRLESG
VPSRFSGSGSGTEFTLTISSLQPEDFATYYCQQYNSNP
>V149RF-JYKQ01005019.1-igkv |(2049, 2337)|2.99899600001|(1.000,0.999,1.000)|-1
IVLTQSPGTLSLSPGERATLSCRASQSVSSSLAWYQQKPGQVPRLLIYGASSRATGIPDR
FSGSGSGTEFTLTISSLEPEDFAVYYCQQYSNWP
>V150RF-JYKQ01005022.1-igkv |(4846, 5146)|3.0|(1.000,1.000,1.000)|-1
ARCDIQMTQSPSSLSASAGDRVTITCRASQGISTYLNWYQQKPGKAPKLLIYAASSLQSG
VPSRFSGSGSGTEFTLTISSLQPEDFATYYCQQYNSYP
>V151RF-JYKQ01005026.1-igkv |(2797, 3089)|3.0|(1.000,1.000,1.000)|-1
AKCDIQMTQSPSSLSASVGDRVTITCRASQTISSYLAWYQQKPGKVPKLLIYAASSLESG
VPSRFSGSGSGTEFTLTISSLQPEDFATYYCQQHN
>V152RF-JYKQ01005027.1-igkv |(25376, 25667)|2.99798400013|(1.000,0.998,1.000)|-1
DIQMTQSPASLSASVGDRVTITCRASQSFSSSLAWYQQKPGKAPKLLIYSASSLQSGVPS
RFSGSKSGTDFTLTISSLQPEDIASYYCQQYYSTP
>V153RF-JYKQ01005032.1-igkv |(9334, 9634)|2.99899600001|(1.000,0.999,1.000)|-1
TTGQVILTQSPATLSLSPGERATLSCRASQSVSSNLAWYQQKPGQAPRLLIYGASSRATG
IPDRFSGSGSGTEFTLTISSLEPEDFAVYYCQKYSSSP
>V154RF-JYKQ01005032.1-igkv |(50469, 50773)|2.12016959072|(0.701,0.734,0.690)|-1
SIGDIELTQTLHSLPVNPGEPASISCQSSQSLLHSDGKTYFYWFLQKPGQHPRHPIYWVS
NWNSGVPDRFSGSGAGTDFTLRISVVEAEDVGVYYYMQV
>V155RF-JYKQ01005033.1-igkv |(2883, 3181)|2.85065853484|(0.999,0.895,0.999)|-1
SKGEIVLTQSPAFRSVTLKEKVTITCQASQSIGSSLHWYQQKPDQSPKLLIKYASQSISG
VPSRFSGSGSGTDFTLTINSLEAEDAATYYCQQSRSF
>V156RF-JYKQ01005040.1-igkv |(7064, 7364)|2.9007472372|(0.999,1.000,0.924)|-1
TRCAIQMTQSPSSLSASVGDRVTITCRASQSIGSNLAWYQQKPGKVPKLLIYAASTLQSE
VPSRFSGSGSGADFTLTISSLQPEDVATYYCQKCDSAP
>V157RF-JYKQ01005045.1-igkv |(2627, 2942)|2.920828921|(0.994,1.000,0.939)|-1
SSGDIVMTQTPLSLPVTPGEPASISCRSSQSLLHSDGYTYLDWYLQKPGQSPQLLIHGGS
NRASGVPDRFSGSGSGTDFTLKISKVEAEDVGVYYCMQHRALP
>V158RF-JYKQ01005048.1-igkv |(219, 521)|2.97341305243|(1.000,0.994,0.981)|-1
SSGDVVMTQSPLSLPVTPGQPASISCRSSQSLVHSNGNTYLSWLQQKPGQPPRLLIYKVS
NRDSGVPDRFSGSGAGTDFTLKISRVEAEDVGVYYCVQV
>V159RF-JYKQ01015003.1-ighv |(1329, 1641)|3.0|(1.000,1.000,1.000)|-1
VLSQVQLQESGPGLVKPSETLSLTCAVSGGSISGSYGWNWIRQPPGKGLEWIGRIYGSSG
NTYYNPSLKSRVTISRDTSKNQFSLKLSSVAAADTAVYYCAR
>V160RF-JYKQ01015024.1-ighv |(3039, 3348)|2.90767205249|(0.972,0.973,0.963)|-1
AHSQEQLVQSGAEVKKPGASVKVSCKASGYIFTGYIISWLRQAPGQGFEWMGGIHPGYGS
TSYAQKFQGRVTMTGDTSTSTVYMELSSLRSEDTAMYYCAA
>V161RF-JYKQ01015026.1-ighv |(1663, 1972)|2.99596000066|(1.000,0.997,0.999)|-1
AHSEMQLVQSEAEVKKPGASVKVSCKASGYTFTYRYLHWVRQTPGQGLEWMGWITPYNGN
TNYAQKFQGRVTITRDRSMSTAYMELSSLRSEDTAVYYCAR
>V162RF-JYKQ01026643.1-trav |(15229, 15519)|2.88542445559|(0.975,0.935,0.982)|-1
VSSEDKVMQNPLSLVVHEGDTVTLNCSYEVANFRSLLWYKQEKKAPIFLFTLTSSGIEKK
SGRLSSILDKKDLYSILNITATQTRDSAVYLCAVE
>V163RF-JYKQ01026644.1-trav |(630, 917)|2.13513919683|(0.673,0.780,0.868)|-1
VTSQELEQSPQSLIVQEGKNLTINCTSSKTLYGLHWYKQKYGEGLIFLMMLQQGGEEKSH
EKITAKLDEKKQQSFLHITASQPSHAGIYLCGGD
>V164RF-JYKQ01026645.1-trav |(2233, 2520)|2.17435631961|(0.688,0.761,0.868)|-1
VSSQELEQSPQSLIVQEGKNLTINCTSSKTLYGLHWYKQKYGEGLIFLMMLQQGGEEKSH
EKITAKLDEKKQQSFLHITASQPSHAGIYLCGGD
>V165RF-JYKQ01026655.1-trav |(5208, 5498)|2.85597825001|(0.972,0.950,0.940)|-1
TIIDAKTTQPTSMDCAEGRAANLPCNHSTISGSEYVYWYRQIHSQEPQYVIHGLKNNETN
VMASLIITEDRKSSTLILPHATLRDTAVYYCIVRG
>V166RF-JYKQ01026663.1-trav |(902, 1202)|2.97230822856|(0.996,0.994,0.983)|-1
SSVAQKVTQTQSSVSMPVEKAVTLNCQYETSRWSYYLFWYKQPPSKEMIFLIRQGSSEPN
AKSGRYSVNFQKAASSIALTISALQLEDSATYFCALWE
>V167RF-JYKQ01026665.1-trav |(1710, 2010)|2.97398400013|(0.992,0.992,0.990)|-1
SSVAQKVTQAQSSVSMPVGKAVTLNCQYETSWWSYDLFWYKQPPSKEMIFLIRQGYSEQN
ARNGRYSVNFQKAASSIALTISALQLEDSATYFCALRE
>V168RF-JYKQ01042840.1-ighv |(1682, 1994)|2.7588467507|(0.974,0.863,0.970)|-1
VLSQLQLQESGPGLVRPSETLSLICTVSGGSISDSYYWNWIRQPPGKGLEWIGNIYGGGG
STNYNPSLKSRVTISKDASKNQFSLKLSSVTAADTAVYYCAR
>V169RF-JYKQ01042857.1-ighv |(1035, 1344)|2.9700882474|(1.000,1.000,0.973)|-1
AQSQVQLVQSGAEVKKPGASVKLSCKASGFTFGSYAISWVRQAPGQGLEWMGEIIPAFGI
ADYAQKFQGRVTITADTSTNTAYMELSSLRSEDTAVYYCAR
>V170RF-JYKQ01042859.1-ighv |(151, 465)|1.78572711144|(0.912,0.794,0.547)|-1
VLSQVTLKESGPALVKPTQTLTLTCTFSGFSISTSGMGVSWIRQPSGKALEWLALIYWND
DKYYSPSLKSRLTISKDTSKNQVVLTMTNMDPVDTATYYCARV
>V171RF-JYKQ01042861.1-ighv |(9368, 9683)|3.0|(1.000,1.000,1.000)|-1
VQCEVQLVESGGGLVQPGGSLRLSCAASGFTFSDYYMYWVRQAPGKGLEWVGFIRSKAYG
GTAEYAASVKGRFTISRDDSKSIASLQMNSLRAEDTAVYYCTR
>V172RF-JYKQ01044654.1-igkv |(1250, 1550)|3.0|(1.000,1.000,1.000)|-1
ARCDIQMTQSPSSLSASVGDKVTITCHASQGISSWLAWYQQKPGKAPKPLIYKASSLQSG
VPSRFSGSGSGTDFTLTISSLQPEDFATYYCQQNSSSP
>V173RF-JYKQ01044659.1-igkv |(1025, 1322)|2.0524188447|(0.894,0.645,0.782)|-1
TTGETVLTQSPATLYLSPGERATLSCRASQSVGSYLAWYQQKPGQAPRLLICGASSRAAG
IPARFSGSGSGTDFTLTISSLEPEDFAVYFCLQRETG
>V174RF-JYKQ01044662.1-igkv |(2570, 2870)|3.0|(1.000,1.000,1.000)|-1
AKCDIQMTQSPPSLSASVGDRVTITCRASQGISNWLAWYQQKPGEAPKLLIYAASTLQSG
VPSRFSGSGSGTEFTLTISSLQPEDFATYYCQQHNSYP
>V175RF-JYKQ01052437.1-igkv |(14196, 14511)|2.89579292281|(0.995,0.938,0.977)|-1
SSGDVVMTQSPLSLPVTPGQPASISCRSSQSLVHSNGNTYLNWFQQKPGQPPRLLIYKVS
NRYSGVPDRFSGSGAGTDFTLKISRVEAEDVGIYYCMQSIHLP
>V176RF-JYKQ01052439.1-igkv |(123, 425)|2.99799200002|(1.000,0.999,0.999)|-1
SSGDVVMTQSPLSLSVTIGQPASISCRSSQSLVHSDGKTYLNWLQQKPGQPPRRLIYQVS
NRDSGVPDRFSGSGAGTDFTLKISRVETEDVGVYYCVQG
>V177RF-JYKQ01052440.1-igkv |(29428, 29728)|2.99899600001|(1.000,1.000,0.999)|-1
ARCDIQLTQSPSSLSASVGDRVTITCQASQGISNNLAWYQQKPGKVPKLLIYAASTLQSG
VPSRFSGSGSGTDFTLTISSLQPEDFATYYCQHGYGTP
>V178RF-JYKQ01052440.1-igkv |(44786, 45101)|2.91174548772|(0.997,0.933,0.998)|-1
SSGDIVMTQTPFSLPVTPGEPASISCRSSQSLLHSDGRTYLYWYLQKPGQPPRLLIYRVS
NRFSGVPDRFSGSGSGTDFTLKISRVEAEDVGVYYCMQALQNP
>V179RF-JYKQ01052440.1-igkv |(49779, 50094)|2.96917355698|(0.996,1.000,0.975)|-1
SSGDIVMTQTPLSLPVTPGEPASISCRSSQSLLHSNGNTYLHWYLQKPGQSPQLLFYGGS
NRASGVPDRFSGSGSGTDFTLKISKVEAEDVGVYYCVQAIAFP
>V180RF-JYKQ01052440.1-igkv |(68584, 68899)|2.9783881665|(0.998,0.986,0.995)|-1
SSGDIVMTQTPLSLPVTAGEPASISCRSSQSLLHSNGNTYLYWYLQKPGQPPWLLIYRVS
NRFSGVPDRFSGSGSGTDFTLKISRVEAEDVGVYYCMQALQTP
>V181RF-JYKQ01052440.1-igkv |(90005, 90305)|3.0|(1.000,1.000,1.000)|-1
ARCDIQMTQSPSSLSASVGDRVTITCRASQGISNYLNWYQQKPGKAPKLLIYRASNLETG
VPSRFSGSGSGTDFTLTISSLQPEDIATYYCQKHDNSP
>V182RF-JYKQ01052440.1-igkv |(99434, 99748)|2.73598890153|(0.991,0.988,0.842)|-1
SSGDVVMTQTPLSLPVTPGEPASISCRSSQSLLHSNGNTYLHWYLQKPGQSPRLLIYKVT
NRESGVPDRFSGSGSGTDFTLKISRVEPEDVGVYYCMQNTKAP
>V183RF-JYKQ01052440.1-igkv |(120035, 120335)|3.0|(1.000,1.000,1.000)|-1
ARCDIQMTQSPSSLSASIGDRVTITCRASQNIYSNLAWYQQKPGKAPKPLIYYASSVETG
VPSRFSGSGSGTDYTLTISSLQPEDVATYYCQQYDNSP
>V184RF-JYKQ01052441.1-igkv |(8581, 8881)|3.0|(1.000,1.000,1.000)|-1
ARCDILMTQSPASLSASVGDRVTITCRASQGISNYLAWYQQKPGETPKLLIYAASSLQSG
IPSRFSGSGSGTDFTLTISSLQPEDFATYYCQHYYSTP
>V185RF-JYKQ01052442.1-igkv |(12441, 12756)|2.98972803289|(1.000,0.998,0.992)|-1
TSGDIVMTQTPLSLPVTPGEPASISCRSSQSLLHSGGKTYLYWYLQKPGQSPQLLIQEVS
NRASGVPDRFSGSGSGTDFTLKISRVEAEDVGVYYCMQGIQLP
>V186RF-JYKQ01052443.1-igkv |(11550, 11850)|3.0|(1.000,1.000,1.000)|-1
ARCDIQMTQSPSSLSASVGDRVTITCQASQSLSNYLNWYQQKPGKIPKLLIYGASSLQSG
IPSRFSGSGSGTDYTLTISSLQPEDFATYYCQQGYSNP
>V187RF-JYKQ01052443.1-igkv |(27506, 27821)|2.99174403277|(1.000,0.992,1.000)|-1
TSGDIVMTQTPLSLPVTLGEPASISCRSSQSLLHSDGYTYLDWYVQKPGQSPQLLIYLVS
NRASGVPDRFSGSGSGTDFTLKISRVEAEDVGVYYCMQGTQLP
>V188RF-JYKQ01052444.1-igkv |(11183, 11498)|2.98356408064|(0.997,0.987,1.000)|-1
YSGDIVMTQTPLSLPVIPGEPASISCRSSQSLLDSDGYTCLDWYLQKPGQSPQLLIYEVS
NRASGVPDRFSGSGSGTDFTLKISRVEAEDVGVYYCMQSIEFP
>V189RF-JYKQ01052444.1-igkv |(23082, 23397)|2.75291442053|(0.922,0.979,0.874)|-1
SSGDIVMTQTPLSLPVIPGEPASISCRSSQSLLRSDGYTYLHWYLQKPGQSPQLLIYLGS
NCASGVPDRFSGSGSGTDFTLKISRVEAEDIGIYYRMQNLQIP
>V190RF-JYKQ01052444.1-igkv |(27757, 28057)|3.0|(1.000,1.000,1.000)|-1
ARCDIQMTQSPSSLSASVGDRVTITCRASQGINKELAWYQQKPGKAPMLLLYSGSSLHTG
VPSQFSGSGSGTDFTLTISSLQPEDVATYYCRQDYTTP
>V191RF-JYKQ01052444.1-igkv |(35903, 36218)|2.97670083945|(0.999,0.981,0.998)|-1
SSGDIVMTQTPLSLPVTPGQPASISCRSSQSLLHSDGYTYLHWYLQKPGQSPRLLIYLVS
NRASGVPDRFSGSGSGTDFTLKISRVETEDVGVYYCMQTLQTP
>V192RF-JYKQ01052444.1-igkv |(45830, 46130)|2.99899600001|(1.000,0.999,1.000)|-1
ARCDIQMTQSPSSLSASVGDRVTITCRASQGIGNYLAWYQQKPGETPKLLIYAASSLQSG
IPSRFSGSGSGTDYTLTISSLQPEDFATYYCQQGYSNP
>V193RF-JYKQ01052444.1-igkv |(60842, 61157)|2.99498400013|(0.999,0.999,0.997)|-1
TNGDIVMTQTPLSLPVTPGEPASISCRSSQSLLHSDGKTYLHWYLQKPGQSPQLLIYLVS
NRASGVPDRFSGSGSGTDFTLKISRVEVEDVGVYYCEQGTQLP
>V194RF-JYKQ01052450.1-igkv |(9881, 10181)|2.99899600001|(1.000,0.999,1.000)|-1
ARCDIQMTQSPSSLSASVGDRVTITCRASQSINKELDWYQQKPGKAPTLLIYAASSLQTG
VSSRFSGSGSGTDFTLTISSLQPEDVATYYCQQDYTTP
>V195RF-JYKQ01052451.1-igkv |(138372, 138687)|2.97739727933|(1.000,0.980,0.999)|-1
SRGDIVMTQTPLSLPVTPGEPASISCRSSQSLLHSNGYTYLHWYLQKPGQSPQLLIYLGS
NRASGVPDRFSGSGSGTDFTLKISRVEAEDVGVYYCEQTLQTP
>V196RF-JYKQ01056010.1-ighv |(10615, 10921)|3.0|(1.000,1.000,1.000)|-1
VQCEVQLVESGGGLVQPGGSLRLSCAASGFTFSSYAMQWVHQAPGKGLEWVSAIGPGGDT
YYADAVKGRFTISRDNAKNSLYLQMNSLRAEDTAVYYCAR
>V197RF-JYKQ01056018.1-ighv |(1836, 2148)|2.92500040988|(0.982,0.967,0.977)|-1
VLSQVKLQQWGEGLVKPSETLSLTCAIYGGSISGYYYWSWIRQPPGKGLEWIGNIYGGGG
STNYNPSLKNRVTISKDTSKNQFSLKLSSVTAADTAVYYCAR
>V198RF-JYKQ01062878.1-ighv |(882, 1191)|3.0|(1.000,1.000,1.000)|-1
VQCEVQLVESGGGLVKPGASLRLSCAASGFTFSSYGMHWVRQAPGKGLEWVSYISSDSSY
IYYADSVKGRFTISRDNAKNSLSLQMNSLKTEDTAVYYCAR
>V199RF-JYKQ01062881.1-ighv |(1585, 1894)|2.99899600001|(1.000,1.000,0.999)|-1
AHSQVQLVQSGAEVKKPGSSVKVSCKASGYTFTDYYMQWVRQAPGQGLEWMRWINPYNGN
TKYAQKFQGRVTMTRDTSTSTAYMELSSLRSEDTAVYYCAT
>V200RF-JYKQ01062881.1-ighv |(4488, 4803)|2.98684833171|(0.988,1.000,1.000)|-1
VQCEVQLVESGGGLVQPGGSLRLSCAASGFTFSNHCMSWVRQAPGKGLEWVGFIRNKAKG
GTAEYAASVKGRFTISRDDSKSIAILQMNSLKTEDTAMYYCTR
>V201RF-JYKQ01062939.1-trav |(3077, 3367)|2.30267048273|(0.903,0.678,0.905)|-1
TIIDAKTTQPTSMDCAEGRAANLPCNHSAISANEYIHWYRQIHSQGPQYVIHGLKDNETN
AMASLIITEDRKSSTLILPHATLRDTAVYYCILRV
>V202RF-JYKQ01066660.1-trav |(3004, 3294)|2.66546075075|(0.931,0.813,0.989)|-1
TIIDAKTTQPTSMDCAEGRAANLPCNHSTIGGNEYIHWYRQIHSQGPQYVIHGLKNNETN
AMASLIITEDRKSSTLILPHATLRDTAVYYCIVRV
>V203RF-JYKQ01066663.1-trav |(1183, 1482)|1.98546113658|(0.869,0.541,0.953)|-1
VNGQQIMQIPQYQHVQEGEDFTTHCNFSTTLSNIQWYKQRPGGHPVFLITLVKSREVKKQ
KRLTFKSGEAKKNSSLHITATQTTDVGTYFCAGHSAPQ
>V204RF-JYKQ01066669.1-trav |(750, 1050)|2.97398400013|(0.992,0.992,0.990)|-1
SSVAQKVTQAQSSVSMPVGKAVTLNCQYETSWWSYDLFWYKQPPSKEMIFLIRQGYSEQN
ARNGRYSVNFQKAASSIALTISALQLEDSATYFCALRE
>V205RF-JYKQ01075081.1-igkv |(781, 1078)|1.94378403954|(0.630,0.941,0.783)|-1
TTGETVLMQSPATLSLSPGERATLSCRASQSVSNRLAWYQQKPGQAPRLLIYGASSRATG
IPDRFSGSRSGTEFSLTISSLEPEDFAVYFCLQRVTG
>V206RF-JYKQ01075085.1-igkv |(254, 554)|2.994900005|(1.000,0.995,1.000)|-1
ARCDIQMSQSPPSLSASVGDRVTITCQACQGISNYLAWYQQKPGKAPKLLIYAASTLQSG
VPSRFSGSGSGTEFTLTISSLQPEDFATYYCQQRNSYP
>V207RF-JYKQ01076935.1-igkv |(39827, 40127)|3.0|(1.000,1.000,1.000)|-1
ARCDIQMTQSPSSLSASVGDTVTITCQASQGISDYLAWYQQKPGKAPKLLIYAASNLESG
VPSRFSGSGSGTEFTLTISSLQPEDFATYYCQQYDSDP
>V208RF-JYKQ01076937.1-igkv |(20686, 20986)|2.9969280013|(0.997,1.000,1.000)|-1
ARCDIQMSQSPSSLSASVGDRVTITCRASQGISNALAWFQQKPGKAPKLLIYAASSLQSG
VPSRFSGSGSGTDYTLTISSLQPEDFATYYCQQGYSTP
>V209RF-JYKQ01076937.1-igkv |(32283, 32583)|3.0|(1.000,1.000,1.000)|-1
ARCDIQMTQSPSSLSASVGDRVTITCRASQGISSYLNWYQQKPGKAPKLLIYYATSLESG
VPSRFSGSGSGTEFILTISSLQPEDFATYYCQQHNSYP
>V210RF-JYKQ01076937.1-igkv |(51727, 52015)|2.97896052424|(0.998,0.982,1.000)|-1
IVMTQSPATLSLSLGETATISCRTSQSVGRKLAWYQQKPGQAPRLLIYGASSRATGIPDR
FSGSGSGTDFTLTISSLEPEDFAVYYCQETSNLS
>V211RF-JYKQ01080923.1-iglv |(25992, 26293)|1.97236723766|(0.837,0.538,0.938)|-1
VQAGLTQPPSVSKGLKQTATLTCTGNSNNVGNQGAAWLQQHQGHPPKLLSYRNNNRPSGI
SERFSASRSGNTASLTITGLQPEDEADYYCSAWDSSLS
>V212RF-JYKQ01080923.1-iglv |(36388, 36694)|3.0|(1.000,1.000,1.000)|-1
SWAEVVFTQPHSVSGSPGQTVTISCTRSSGSIDSKYVQWYQQRPGSAPTTVIYEDNKRPS
GVPDRFSGSIDSSSNSASLTISGLKSEDEADYYCQSADGS
>V213RF-JYKQ01080923.1-igkv |(73004, 73324)|1.64996876216|(0.564,0.720,0.484)|-1
SLSQPVLTQSPSASASLGASVKLTCTLSSGHSSYTIAWHQQQQGKAPRYLMWLKSDGSHS
KADGIPDRFSGSSSGADRYLTISNLQSEDEADYYCHTWNTGIHTV
>V214RF-JYKQ01081225.1-igkv |(3273, 3573)|3.0|(1.000,1.000,1.000)|-1
ARCDIQMTQSPSSLSASVGDKVTITCQASQSISSWLTWYQQKPGKAPKLLIYKASTLQSG
VPSRFSGSGSGTEFTLTISSLQPEDFATYYCQQFSSAP
>V215RF-JYKQ01098165.1-iglv |(3768, 4077)|2.14370899451|(0.990,0.799,0.729)|-1
SRAQSVLTQPPSVSGALGQRVTISCSGSGSNIGSNDVYWYQQFPGTAPKLLIYDNNQRPS
GVPDRFSGSKSGTSASLAISGLQPGDEADYYCAAWNDSLSG
>V216RF-JYKQ01098166.1-iglv |(974, 1284)|2.5210290517|(0.984,0.938,0.772)|-1
SLSQPMLTQPASLSASPGASASLTCTFSGGINVAGYYIYWYQQKPGSPPRYLLKYKSDSD
KHQGSGVPSRFSGSKDASANTGILRISGLQSEDEADYYCAI
>V217RF-JYKQ01126545.1-iglv |(13640, 13950)|2.99598400013|(0.998,1.000,0.998)|-1
SWAQAALTQPPSVSGSPGQSVTISCTGTSSDIGGYNYVSWYQQHPGKAPKLMIYDVSKRP
SGVSDRFSGSKSGNTASLTISGLQAEDEADYYCSSYASSST
>V218RF-JYKQ01126545.1-iglv |(37360, 37652)|2.97766884009|(1.000,0.982,0.997)|-1
SYELTQPPSVSVSPGQTARITCSGDALPEKYAYWYQQKPGQSPVLIIYEDSKRPSGIPER
FSGSSSGTVATLTISGAQVEDEADYYCYSADSSGN
>V219RF-JYKQ01126545.1-iglv |(44839, 45135)|2.12664516119|(0.898,0.598,0.940)|-1
SVASYELTQPLSVSVALGQMARITCGGNNIGRKYVYWYQQKPDQAPVLVIYEDSKRPSGI
PERFSGSNSGNMATLTIDGAQARDEADYYCQVWDSST
>V220RF-JYKQ01126545.1-iglv |(48188, 48491)|3.0|(1.000,1.000,1.000)|-1
SWAQAALTQPHSVSGSPGQSVTISCTGTSSDIGGYDRVSWYQQHPGKAPKLMIYEVSKRP
SGVSDRFSGSKSGNTASLTISGLQAEDEADYYCSSYAGS
>V221RF-JYKQ01126545.1-iglv |(71572, 71866)|2.99396400065|(0.999,0.996,0.999)|-1
QSALIQSPSVSGSLGQSVTISCTGTSSDIGRYNYVSWYQQQPGTTTKLMMYNVNTRPSGV
SDRFSGSKSGNTASLTISGLQAEDEADYYCSSYEAS
>V222RF-JYKQ01126546.1-iglv |(14999, 15296)|2.93293283577|(0.995,0.953,0.992)|-1
SVASYELTQPPSVSVSPGQTAKITCSGDVLAKYYAHWFQQKPGQAPVLVIYKDSERPSGI
PERFSSSSSGTTVTLTISGAQAEDEADYYCYSGDDNN
>V223RF-JYKQ01126546.1-iglv |(24524, 24827)|3.0|(1.000,1.000,1.000)|-1
SWAQSALTQPPSVSGSPGQSVTISCTGTSSDVGGYSYVSWYQQHPGKAPKLMIYGVSNRP
SGVSDRFSGSKSGNTASLTISGLQAEDEADYYCCSYTTS
>V224RF-JYKQ01126546.1-iglv |(36976, 37279)|2.98859608|(1.000,0.990,0.999)|-1
SAASYDLTQPPSVSVSPGQTARITCGGDNIESEAVHWYQQKPPQAPVLVIYADSERPSGI
PERFSGSKSGNTATLTISGVEAGDEADYYCQMWDSSSKH
>V225RF-JYKQ01126546.1-iglv |(44080, 44383)|1.86692013663|(0.984,0.766,0.650)|-1
SVVSSELTQESALSVALGQTVRITCQGDSLSSYYASWYQQKPGQVPVLVIYGNTNRPSGI
PGRFSGSWSGNTASLTITGAQVEDEADYYCGSWDNSGNH
>V226RF-JYKQ01126546.1-iglv |(60437, 60740)|2.99899600001|(1.000,0.999,1.000)|-1
SAASYDVTQPRSVSVSPGQTARITCGGDNIGSKYVQWYQQKPAQAPVLVIYDNSDRPSGI
PERFSGSNSGNTATLTISGVEAGDEADYYCQVWDSSSDH
>V227RF-JYKQ01126546.1-igkv |(65229, 65532)|1.88604034694|(0.690,0.573,0.677)|-1
SVVSSELTQEPALSVALGHTVSMTCQGDSLKTYYASWYQQKPGQVPVLVIYGNNYRPSGI
PGRFSVSWSGNTGSLTITAAQVEDEADYYCNSWDSSGNH
>V228RF-JYKQ01126546.1-iglv |(71769, 72072)|2.99389600501|(1.000,0.999,0.995)|-1
SWAQAALTQPPSVSGSPGQSVTISCTGTSNDVGGYNYVSWYQQHPGKALKLMIYEVSKRP
TGVSDRFSGSKSGNTASLTISGLQAEDEADYYCGSYSGS
>V229RF-JYKQ01126546.1-iglv |(81293, 81598)|2.01210682794|(0.755,0.582,0.794)|-1
SVASYELTQPPLVSVSPGQTARISFSGDILKENYADWYQQKPGQAPVLVIYEDSKRPSGI
PERFSGSTSGDTTTLTISSTLSEDEADYSCFSGNENNPTV
>V230RF-JYKQ01126546.1-iglv |(89596, 89899)|2.94926378359|(1.000,0.969,0.985)|-1
SAASYDVTQPRSVSVSPGQTARITCGGDSIGSKVVNWYQQKPAQAPVLVIYADSVRPSGI
PERFSGSNSGNTATLTISGIEAGDEADYYCQVWDSSSDH
>V231RF-JYKQ01126546.1-iglv |(116413, 116723)|2.98780001921|(0.998,0.999,0.991)|-1
SWAQSALTQPPSVSGSPGQSVTISCTGTSSDVGGYNYVSWYQQHPGKAPKLMIYEVSKRP
SGVSDRFSGSKSGNTASLTISGLQAEDEADYYCSSYRSSNT
>V232RF-JYKQ01126546.1-iglv |(124245, 124548)|2.00736180841|(0.976,0.560,0.971)|-1
SEASYELTQPPSVSVSPGQTARITCSGEILAKKYARWFQQKPGQAPVLVIYKDSERPSGI
PERFSSSSSGTTVTLTISGAQAEDEADYYCQSADSSGNH
>V233RF-JYKQ01126579.1-iglv |(22005, 22315)|2.80343436606|(0.998,0.995,0.872)|-1
SLSQPVLTQPASLSASPGASASLTCTFSGGINVAGYYIHWYQQKPGSPPRYLLRYKSDSD
KHQGSGVPSRFSGSKDASANTGILRISGLQSEDEADYYCAI
>V234RF-JYKQ01126579.1-iglv |(26551, 26860)|2.85288748934|(0.979,0.928,0.958)|-1
SWAQSVLTQPRSASEAARKSVTISCSGSSSNIGSNYVSWYQQLPETAPKLLIYYDDLRAS
GVSDRFSGSKSGTSASLAISGLQTEDEADYYCAAWDDSLSG
>V235RF-JYKQ01126579.1-igkv |(50868, 51190)|1.60802381445|(0.851,0.603,0.598)|-1
SLSQSVLTQPPSFSTSGASASLTCTLRSDINVSRYRIYWYQQKPESPPRYLLSYYSDSYK
HQGSGVPSRFSGSKDASVNAGLLLISGLQPEDEADYYCKTGYGNA
>V236RF-JYKQ01126580.1-iglv |(2043, 2350)|2.99280401921|(1.000,1.000,0.993)|-1
SWAQSVLTQPPSVSGDPGQRVTISCTGSSSNIGGYDVYWYQQVPGTAPKLLIYDNNKRPS
GVSDRFSGSKSGTSASLTITGLQTEDEADYYCQSYDSSLS
>V237RF-JYKQ01126580.1-iglv |(7851, 8158)|2.99383600705|(0.995,1.000,0.999)|-1
SWAQSVLTQPPSVSGAPGQKVTISCTGSSSNIGGYNVYWYQLLPGTAPKLLIYDNNKRPS
GISDRFSGSKSGTSASLAITGLQSEDEADYYCQSYDSSLS
>V238RF-JYKQ01126581.1-iglv |(5729, 6039)|2.99285201038|(1.000,0.999,0.994)|-1
SLSQPVLTQPASLSASPGASARLTCTLSSGINVGSYSIYWYQQKPGSPPRYLLYYYSDSD
KHQGSGVPSRFSGSKDASANAGLLLISGLQSEDEADYYCAI
>V239RF-JYKQ01126581.1-iglv |(16324, 16633)|2.95764947362|(0.998,0.965,0.999)|-1
SWAQSVLTQPPSVSAAPGQRVTISCSGSSSNIGRGYVSWYQQLPGTAPKLLIYDNNKRPS
GISDRFSGSKSGNSASLTITGLQTGDEADYYCGAWDSSLSA
>V240RF-JYKQ01126581.1-iglv |(20501, 20808)|3.0|(1.000,1.000,1.000)|-1
SWAQSVLTQPPSVSGAPGQRVTISCTGSSSNIGGYYVQWYQQLPGTAPKLLIYGNNKRPS
GVSDRFSGSQSGTSASLAITGLQSEDEADYYCEAWDNSLS
>V241RF-JYKQ01126585.1-iglv |(7447, 7757)|2.93279088874|(1.000,0.947,0.997)|-1
SLSQPVLTQPASLSASPGASVRLTCTLRSGISVGGYNIHWYQQKPGSPPRYLLYYYSDSN
KGQGSGVPSRFSGSKDASANAGILLISGFQSEDEADYYCTT
>V242RF-JYKQ01126585.1-iglv |(12290, 12599)|2.99899600001|(1.000,1.000,0.999)|-1
SWAQSVLTQPPSASGAPGQRVTISCSGSSSNIGSNYVSWYQQLSGKAPKLLIYKNNQRPS
GVPDRFSGSKSGNSASLAISGLQSEDEADYYCAAWDDSLSG
>V243RF-JYKQ01126586.1-iglv |(1288, 1598)|2.90576213034|(1.000,0.964,0.955)|-1
SLSQPMLTQPASLSASPGASASLTCTFSGGINVAGYYIHWYQQKPGSPPRYLLRYKSDSD
KHQGSGVPSRFSGSKDASANTGILRISGLQSEDEADYYCAI
>V244RF-JYKQ01126586.1-iglv |(6152, 6459)|2.86145858986|(0.945,0.997,0.931)|-1
SWAQSVLTQPPSASGAPGQSVTISCSGSSSNIRGNGVHWYQQLSGTAPKLLIYNNNQRPS
GVPDRFSGSKSGTSASLTITGLRSEDEAHYYCEAWDNSLS
>V245RF-JYKQ01126589.1-iglv |(2854, 3164)|3.0|(1.000,1.000,1.000)|-1
SWAQSVLTQPPSVSGAPGQRVTISCTGSSSNIGAGYYVQWYQQLPGTAPKLLIYENNKRP
SGVTDRFSGSKSGTSASLTITGLQSEDEADYYCQSYDSSLS
>V246RF-JYKQ01126589.1-iglv |(33453, 33763)|2.83794289672|(1.000,0.898,0.982)|-1
SLSQPVLTQPTSLSASPGASARLTCTLRSGISVGSYRIYWYQQKPGSPRRYLLNYYSDSD
KHQGSGVPSRFSGSKDASANAGILLISGLQPEDEADYYCMI
>V247RF-JYKQ01126589.1-iglv |(38258, 38567)|2.99798400013|(1.000,0.998,1.000)|-1
SWAQSVLTQPPSASGAPGQRVTISCSGSSSNIGSNYVYWYQQFPGTAPKLLIYYSNQRPS
GVPDRFSGSKSGTSASLAITGLQSEDEADYYCAAWDNSLSG
>V248RF-JYKQ01135395.1-trav |(125257, 125563)|1.72078128928|(0.596,0.568,0.564)|-1
RGMLCDKVTQSSPDQMVASGSEVVLLCTYDSTYSDPGLFWYRIRPDYNFQFVIYGDESRS
HGAYFAQGRFSVKHLLTQRAFHLVISPVRTEDSATYYCAM
>V249RF-JYKQ01187338.1-igkv |(11159, 11459)|2.91750221476|(0.956,1.000,0.970)|-1
TTGQVILTQSPATLSLSPGERATLSCRASQSVSSYLAWYQQKPGQAPRLLIHSVSSRATG
IPDRFSGSGSGTEFTLTISSLEPEDVGVYHCYQHSSGY
>V250RF-JYKQ01187347.1-igkv |(14093, 14411)|2.99899600001|(1.000,1.000,0.999)|-1
ACGDIVMTQSPDSLAVSLGERVTINCKSSQSLLYSSNNKNYLAWYQQKPGQAPKLLISWA
STRESGVPNRFSGSGSGTDFTLTISGLQAEDVAVYYCQQHYSSP
>V251RF-JYKQ01237599.1-ighv |(479, 788)|3.0|(1.000,1.000,1.000)|-1
VQGEVQLVESGGGLSKPGGSLRLSCAASGFTFSDYNMHWVRQASGKGLEWVSGISNDGGS
TWYADSVKGRFTISRENAKNTLYLQMNSLRAEDTAVYYCAG
>V0RF-JABR01013263.1-trbv |(179, 479)|2.98899600001|(0.996,0.997,0.996)|1
HMGAGVSQSPRYKVTKKGQDVVLSCDPISGHEALYWYQQALGQGPKFLTYFNYEAQPDKS
GLPNDRFSAERPKGSVSTLTIQRTEQRDSAVYLCASSL
>V1RF-JABR01016432.1-igkv |(2852, 3152)|1.74191577431|(0.549,0.720,0.590)|1
HEALLSPSLSRPRTTMSVSLLLPGSWAQCVLTQPPSVSAAPGQRVTISCSGSSFNFRRYY
VSWYQQLPGAAPKLLIYDVNKRTSGVPERFSGSQSGTS
>V2RF-JABR01016432.1-iglv |(14602, 14903)|1.53110912931|(0.518,0.915,0.582)|1
SLSQPVLTQPPSASASLGASVTLTCTLSSGYSNYAVDWHQQRPGKGPQFVMRVGTGGIVG
SKGDGIPDRFSGSGSGLNRYLTIKNIQEEDESDYHCGA
>V3RF-JABR01016432.1-iglv |(27490, 27800)|2.90622464915|(0.984,0.982,0.946)|1
SLSQPVLTQPTSLSASPGASARLTCTLSSGINVGSYRIFWYQQKPGSPPRYLLWYKSDSD
KHQGSGVPSRFSGSKDASANAGILRISGLHSEDEADYYCTI
>V4RF-JABR01016432.1-iglv |(31781, 32090)|2.99496000066|(0.997,0.998,1.000)|1
SWAQSVLTQPPSASGPPGQSVTISCSGSSSNIGSNYVYWYQQLSGKAPKLLIYDNNKRPS
GVPDRFSGSKSGTSASLAISGLQTEDEADYYCAAWDDSLSG
>V5RF-JABR01020048.1-igkv |(1483, 1801)|2.96319965751|(0.999,0.994,0.973)|1
AYGDIVMTQSPDSLAVSLGERVTINCKSSQSLLYSSNNKNYLAWYQQKPGQAPKLLIYWA
STRESGVPNRFSGSGSGTDFTLTISGLQAEDMAVYYCQQYYSTP
>V6RF-JABR01043229.1-iglv |(142541, 142835)|2.9889000027|(0.994,0.997,0.998)|1
VVTQEPLLSVSSGGTVAITCGLSSGPVSTSNYPSWYQQTPGQAPRTLIYSTNTRPSGVPD
RFSGSILGNKAALTITGAEADDESDYYCVLYMGSGI
>V7RF-JABR01052882.1-trgv |(79087, 79393)|1.82382918958|(0.868,0.641,0.660)|1
RTKSVTRPAGSSAEITCDFSGDSNLYIHWYLHQEGKAPQRLLYYEPYYFKVVLESGISPG
KYDTASTRKSWNLRLQNLIENDSGVYYCATWDRHHDSDLP
>V8RF-JABR01052882.1-trgv |(83822, 84131)|2.25355810867|(0.810,0.677,0.838)|1
RTKSVTRPAGSSAEITCDLPEFSSFYIHWYLHQEGKAPQRLLYCDSSNSRVVLESGISPG
KYDTYVSTRRNLRLRLRNLIENDSGVYYCANWDRHSDSDLL
>V9RF-JABR01052882.1-trgv |(88181, 88494)|2.93724228261|(1.000,1.000,0.948)|1
SQKSSNLEGRTKSVTRPTGSSAEITCDFSGDSNFYIHWYLHQEGKAPQRLLYYDVSNSRD
VLESGLSLGKYYTHTRTRWSWILILRNLIENDSGVYYCATWD
>V10RF-JABR01059011.1-ighv |(294, 609)|3.0|(1.000,1.000,1.000)|1
VQCEVQLVESGGGLVQPGGSLRLSCAASGFTFSNYHMSWVRQAPGKGLEWVGFIRNKASG
GTAEYAASVKGRFTISRDDSKSITYLQMNSLKTEDTAVYYCAR
>V11RF-JABR01059011.1-ighv |(15565, 15872)|2.99398000014|(0.997,0.999,0.998)|1
VQCEVQSVESGGGLVQPGGSLRLSCAASGFTFSSYWMSWVRQAPGKGPEWVSDISGSTIY
YADSVKGRFTVSRDDAKNSLSLQMDSLRAEDTAVYYCARE
>V12RF-JABR01059012.1-ighv |(2630, 2944)|2.16406893691|(0.974,0.933,0.634)|1
VFSQVTLKESGPALVKPTQTLTLTCTFSGFSLSTSGMRVSWIRQPPGKALEWLALIYWDD
DKRYSPSLKSRLTISKDTSKNQVVLTMTNMDPVDTATYYCAQG
>V13RF-JABR01059012.1-ighv |(17062, 17386)|2.91548902774|(0.998,0.987,0.943)|1
AHSQVQLVQSGAEVKQPGASVKVSCKASGYTFTSYAMNWVRQAHGQRLEWIGWINTNTGN
PTYAQGFKERFAFSMDTSISTAYLQISSLKAEDTAVYYCARDTVWK
>V14RF-JABR01062345.1-ighv |(2435, 2744)|2.97274003277|(0.994,0.993,0.986)|1
AQSQEQLVQSGAEVKKPGASVKVSCKASGFTFSSDAISWVRQAPGQGLEWMGRIIPILSR
TNYAQKFQGRVTITADTSTSTAYMELSSLRSEDTAVYYCAR
>V15RF-JABR01066987.1-ighv |(11840, 12146)|3.0|(1.000,1.000,1.000)|1
VQCEVQLTESGGGLVQPDGSLRLSCAASGFTFSSYAMQWVHQAPGKGLEWVSAIGPGGDT
YYADAVKGRFTISRDNTKNSLYLQMNSLRAEDTAVYYCAR
>V16RF-JABR01066987.1-ighv |(19343, 19652)|2.96456408064|(0.986,0.996,0.983)|1
AHSQEQLVQSGAEVKKPGASVKVSCKASGFTFDSSAISWVRQAPGQGLEWMGVIIPVAGI
TNYAQKFQGRVTITADTSTSTAYMELSSLRSEDTAMYYCAA
>V17RF-JABR01070187.1-ighv |(4809, 5118)|2.19691310711|(0.949,0.626,0.964)|1
AHSQVQLVQSGAEVKKPGSSVKVSCKASGYTFTDYYMHWVRQAPGQGLERMGWINTGSGS
TGYAQKFQGRVTMTRDTSTSTAYMELSSLRSEDTAVYYCTT
>V18RF-JABR01070187.1-ighv |(7644, 7959)|2.98778801933|(0.993,1.000,0.995)|1
VQCEVQLVESGGGLVQPGGSLRLSCAASGFTFSDYYMQWVRQAPGKGLQWVGLIRNKANG
GTTDYSVSVKGRCTISRDDSKSITSLQMNSLKTEDTAVYYCAR
>V19RF-JABR01070187.1-ighv |(14433, 14739)|2.99899600001|(1.000,0.999,1.000)|1
VQCEMQLVESGGGLVQPGGSLRLSCAASGFTFSSYDMHWVRQAPGKGLEWVSAISIGGGT
YYPDSVKGRFTISRDNAKNSLYLQMNSLRAEDMAVYYCAR
>V20RF-JABR01071886.1-ighv |(1825, 2139)|2.79648409597|(0.941,0.895,0.973)|1
VWSQVTLKESGPALVKPSQTLTLTCTFSGFSISTSGTGVGWIRQPSGKALEWLASIYWND
SKYYSTSLKSRLTISKDTSKNQVVLTMTNMDPVDTATYYCAHI
>V21RF-JABR01074704.1-ighv |(2136, 2448)|2.99899600001|(1.000,1.000,0.999)|1
VLSQVQLQESGPGLVKPSETLSLTCAVSGGSISSYNYWSWIRQPPGKGLEWIGHIYGNSA
STNYNPSLKSRVTISKDTSKNQFSLKLSSVTAADTAVYYCAR
>V22RF-JABR01074958.1-ighv |(126, 441)|2.87758293044|(0.989,0.923,0.983)|1
VQCEVQLVESGGGLVQPGGPLRLSCAASGFTFSDYYMPWVRQAPGKGLEWVGHIKNKANS
YTTEYAASVKGRFTISRDDSKNTLYLQMNSLKTEDTAVYYCAT
>V23RF-JABR01076259.1-igkv |(8845, 9160)|2.99598000014|(0.999,0.997,1.000)|1
SSGDIVMTQTPLSLPITVGETASISCRSSQSLLSSNGYNYLSWYLQKPGQSLQLLIYYGS
NRASGVPDRFSGSGSGTDFTLKISRVEAEDIGVYYCMQTLQTP
>V24RF-JABR01076260.1-igkv |(856, 1158)|2.99696400065|(1.000,1.000,0.997)|1
STGDVVMTQSPLSLPVTPGEPASISCRSSQSLLHSSGNTYLSWFQQKPGQSPRRLIYKVS
NRDSGVPDRFTGSGAGTDFTLKISRVEAEDVGVYYCMEG
>V25RF-JABR01076260.1-igkv |(17028, 17326)|2.89434102383|(0.999,0.920,1.000)|1
SKGEIVLTQSPAFRSVTPKEKVTITCRASQSIGSSLHWYQQKPDQSPKLLIKYASQSISG
VPSRFSGSGSGTDFTLTINSLEAEDAATYYCQQSSSF
>V26RF-JABR01076261.1-igkv |(12124, 12424)|2.84582226751|(0.997,0.892,1.000)|1
TTGEIVLTQSPAILSLSPGERATFSCRASQSIGSNLAWYQQKPGQAPRLLIYGASSRATG
IPDRFSGSGSGTEFTLTISSLEPEDFAVYYCQKYSSSP
>V27RF-JABR01076261.1-igkv |(17937, 18237)|2.84448691434|(0.982,0.961,0.919)|1
VRCDIQMTQSPSFLSASVEDTVTITCQVSQSISNDLAWYQQKPGKSPTLLIYDATNLHPG
FPSRFSGSGSGADYSLTISSLELEDFAAYYCQQEYSYP
>V28RF-JABR01076261.1-igkv |(78882, 79179)|2.98232022844|(0.999,0.986,0.998)|1
RCDIQMTQSPSSLSASVGDRVTITCRASQSFSSSLAWYQQKLGKAPKLLIYGASSLQSGI
PSRFSGSKSGTDFTLTISSLQPEDVAAYYCQQYYSYP
>V29RF-JABR01076261.1-igkv |(91397, 91697)|2.88406085876|(0.996,0.920,0.991)|1
ARCDIQMIQSPSSLPASVGDRVTITCRASQGISSYLNWYQQKPGKAPKLLIYYATTLQSG
VPSRFSGSGSGTEFTLTISSLQPEDFAVCYCQQHNSYP
>V30RF-JABR01076261.1-igkv |(111081, 111379)|3.0|(1.000,1.000,1.000)|1
ARCDIQMTQSPSSLSASVGDRVTITCRASQGISSYLNWYQQKPGKAPKLLIYAASSLASG
VPSRFSGSGSGTEFTLTISSLQPEDFAAYYCQQYNSA
>V31RF-JABR01076261.1-igkv |(121606, 121906)|2.84105101919|(0.997,0.891,0.997)|1
TTGEIVMTQSPATLSLSPGERATLSCRASQSAGSNLAWYQQKPRQAPRLLIYGASSRATG
IPARFSGSGSGTDFTLTISSLEPEDVGIYYCQQYNDWP
>V32RF-JABR01076261.1-igkv |(164504, 164804)|3.0|(1.000,1.000,1.000)|1
ARCDIQMSQSPSSLSASVGDRVTITCQASQGISNALAWYQQKPGKAPKLLIYDASSLDSG
VPSRFSGSGSGTEFTLTISSLQPEDFATYYCQQYNSDP
>V33RF-JABR01076263.1-igkv |(15350, 15650)|2.99699200002|(0.999,1.000,0.998)|1
ARCDIQMTQSPSSLSASVGDRVTITCQASQGISSYLSWYQQKPGKAPKLLIYKASSLASG
VPSRFSGSGSGTEFTLTISSLQPEDFAAYYCQQHNSLP
>V34RF-JABR01076263.1-igkv |(29170, 29470)|2.78151560002|(0.999,0.920,0.915)|1
ARCDIQMIQSPSSLPASVGDRVTITCRASQGISSYLNWYQQKPGKAPKLLIYYATTLQSG
VPSRFSGSGSGTEFTLTISSLQPEDFAAYYCLQHNSDP
>V35RF-JABR01076263.1-igkv |(35502, 35802)|3.0|(1.000,1.000,1.000)|1
ARCDIQMTQSPSSLSASVGDRVTITCQASQGISSWLAWYQQKPGKAPKLLIYKASSLQSG
VPSRFSGSGSGTEFTLTISSLQPEDFATYYCQQHNSNP
>V36RF-JABR01076263.1-igkv |(51711, 52011)|2.99699200002|(0.999,0.998,1.000)|1
TTGEIVMTQSPATLSLSPGERATLSCRASQSVSSRLVWYQQKHGQAPTLLIYGASSRATG
IPARFSGSGSGTDFTLTISSLEPEDVGVYYCQQDYSWP
>V37RF-JABR01076263.1-igkv |(105623, 105923)|3.0|(1.000,1.000,1.000)|1
ARCDIQMTQSPSSLSASVGDTVTITCQASQGISSYLAWYQQKPGKAPKLLIYAASTLQSG
VPSRFSGSGSGTDFTLTISSLQPEDFATYYCQQYNSNP
>V38RF-JABR01076263.1-igkv |(125399, 125698)|2.99796800026|(0.998,1.000,1.000)|1
TTGEIVMTQSPATLSLSPGERATLSCRASQSVGSYLAWYQQKPGQAPRLLIYGASSRATG
IPDRFSGSGSGTEFTLTISSLEPEDFAVYFCQHYNNWN
>V39RF-JABR01076264.1-igkv |(9604, 9904)|2.90358683121|(0.998,0.997,0.928)|1
ARCDIQMTQSPSSLSASIGDTVTITCHASQSISSWLAWYQQKPGKAPKLLIYKASSLQSG
VPSRFSGRGSGTDFTLTISSLQPEDFATYYCQKCNSNP
>V40RF-JABR01076265.1-igkv |(8185, 8485)|2.99385601037|(1.000,1.000,0.994)|1
TTGEIVMTQSPATLSLSPGERATLSCRASQSVSSYLAWYQQKPGQAPRLLIYGASSRATG
IPARFSGSGSGTDFTLTISSLEPEDVAVYYCQQGSNLP
>V41RF-JABR01076266.1-igkv |(4594, 4894)|3.0|(1.000,1.000,1.000)|1
ARCDIQMTQSPSSLSASVGDRVTITCQASQGISNYLAWYQQKPGKAPKLLIYKASTLQSG
VPSRFSGSGSGTDFTLTISSLQPEDFATYYCQQGNSYP
>V42RF-JABR01076266.1-igkv |(22548, 22848)|3.0|(1.000,1.000,1.000)|1
ARCDIQMTQSPSSLSASVGDRVTITCQASQGISSYLAWYQQKPGKAPKLLIYDASTLQSG
VPSRFSGSGSGTDFTLTISSLQPEDFAAYYCQQGNSNP
>V43RF-JABR01080842.1-trav |(1737, 2024)|2.8526018934|(0.986,0.899,0.998)|1
LSGEDQVTQSPEALRLREGESSSLNCSYTVSSLRGLLWYRQDPGKGPEFLFILYSAGEEK
EKERLKATLTKKESFLHITGPKPEDSATYLCAVQ
>V44RF-JABR01088351.1-igkv |(10561, 10879)|3.0|(1.000,1.000,1.000)|1
TSGDIVMTQTPLSLPVTPGEPASISCRSSQSLLDSDDGYTYLDWYLQKPGQSPQLLIYEV
SNRASGVSDRFSGSGSGTDFTLKISRVEAEDVGVYYCMQSIEYP
>V45RF-JABR01088351.1-igkv |(62711, 63011)|3.0|(1.000,1.000,1.000)|1
ARCDIQMTQSPSSLSASVGDRVTITCRASQSINKELSWYQQKPGKAPTLLIYAASSLQTG
VSSRFSGSGSGTDFTLTISSLQPEDVATYYCLQDYTTP
>V46RF-JABR01088351.1-igkv |(74390, 74708)|2.85709598554|(0.965,0.930,0.967)|1
SSGEIVMTRTPLSLPITPGEPASISCRSSQSLMDGDDGFTYLYWYLQKPGQSPQLLMHFA
SYRASGVPDRFSGSGSGTDFTLEISKVEAEDIGVYYCMQALELP
>V47RF-JABR01088351.1-igkv |(103867, 104182)|2.95682541375|(0.999,0.963,1.000)|1
SSGDIVMTQTPLSLPVIPGEPASISCRSSQSLLHSNGYTYLDWYLQKPGQSPQLLIYLGS
NRASGVPDRFSGSGSGTDFTLKISRVEAEDVGVYYCMQALEFP
>V48RF-JABR01088351.1-igkv |(113703, 114003)|2.99698000014|(1.000,0.999,0.998)|1
ARCDIQMTQSPSSLSASVGDRVTITCRASQGISNDLAWYQQKLGETPKLLIYDASSLQSG
IPSRFSGSGSGADFTLTISSLQPEDFATYYCQHYYSAP
>V49RF-JABR01088351.1-igkv |(136166, 136466)|3.0|(1.000,1.000,1.000)|1
ARCDIQMTQSPSSLSASVGDRVTISCQASQNIYSNLGWYQQKPGKAPKLLIYAASTLQSG
VPSRFSGSGSGTDFTLTISSLQPEDVATYYCQHGYSTP
>V50RF-JABR01088351.1-igkv |(159354, 159654)|2.99899600001|(1.000,0.999,1.000)|1
ARCDIQMTQSPSSLSASVGDRITITCQASQGISNDLAWYQQKPGESPKLLIYEASSLQSG
IPSRFSGSGSGTDFTLTISSLQPEDFATYYCQHYYSTP
>V51RF-JABR01088351.1-igkv |(170244, 170542)|2.98972803289|(1.000,0.992,0.998)|1
ARCDIQMTQSPSSLSASVGDRVTISCQASESISDYLNWYQQKPGKAPKLLIYAASTLQSV
VPSRFSGSGSGTDFTLTISSLQPEDFATYYCQHGYGT
>V52RF-JABR01089346.1-ighv |(860, 1169)|3.0|(1.000,1.000,1.000)|1
AQSQVQLVQSGAEVKKPGASVKVSCKASGYNFRSYAISWVRQAPGQGLEWMGVIIPIRSR
TSYAQKFQGRVTITADTSTSTAYMELSSLRSEDMAVYYCAR
>V53RF-JABR01090264.1-ighv |(61, 375)|2.33734699574|(0.918,0.680,0.945)|1
VWSQVTLKESGPALVKPTQTLTLTCTFSGFSISTSGTGMGWIRQPSGKALEWLASIYWNY
SKYYSTSLKSRLTISKDTSKNQVVLTMTNMDPVDTATYYCAHI
>V54RF-JABR01091180.1-ighv |(15340, 15652)|2.92693691128|(0.997,0.942,1.000)|1
VLSQVQLQESGPAVVKPSETLSLTCAVSGGSISSYYYWSWIRQPPGKGLEWIGYIYGSGG
STYYNPSLKSRVTISTDTSKNQFSLKLSSVTAADTAVYYCAR
>V55RF-JABR01091180.1-ighv |(60296, 60605)|2.99799600001|(0.999,1.000,0.999)|1
VQCEVQLVESGGGLVQPGGSLRLSCAASGFTFSSYWMSWVRQAPEKGLEWVSYINSDGSS
TSYADSMKGRFTISRDNAKNSLYLQMNSLRAEDRAVYYCVR
>V56RF-JABR01091180.1-ighv |(68033, 68348)|3.0|(1.000,1.000,1.000)|1
VQCEVQLVESGGGLVQPGGSLRISCAASGFTFSSSAMHWVRQASGKGLEWVGRIRSKSKN
YATDYAASVKGRFTISRDDSKNTAYLQMNSLKTEDTAVYYCTT
>V57RF-JABR01091180.1-ighv |(78923, 79238)|3.0|(1.000,1.000,1.000)|1
VQCEVQLVESGGGLVQPEGSLRLSCAASGFTFSSYYMHWVRQAPGKGLEWVGLIKNKANS
YTTEYAASVKGRFTISRDDSKNTLYLQMSSLKTEDTAVYYCAR
>V58RF-JABR01092448.1-trbv |(783, 1083)|2.96989600501|(0.992,0.991,0.987)|1
HTDAGVIQSPRHEVTEMGKEVTLRCEPISGHSSLFWYRQTMMRGLEFLIYFNNKSPIDDS
GMPKDRFSAKMPDASFSTLRIQPSEPRDSAVYFCASSL
>V59RF-JABR01092448.1-trbv |(15339, 15639)|2.97271202074|(0.991,0.985,0.997)|1
LIDAGVTQTPRHKVTEIGQEVTMRCQPILGHNTVFWYRQTMMQGLELLVYLRNKASLDDS
GMPKDRFSAEMPDASLATLKIQPSEPRDSAVYLCASGL
>V60RF-JABR01092448.1-trbv |(22332, 22623)|1.8055630547|(0.979,0.771,0.619)|1
PGVTQFPSHRVIEKGQTVTLRCDPISGHDYLYWYRRVIGKEIKFLIYFMRASMQDESGMP
KKRFSAERTGGTYSTLKLQPAELEDSGVYFCASSQ
>V61RF-JABR01092448.1-trbv |(27430, 27727)|1.99969924217|(0.923,0.728,0.688)|1
HGDVMVIQNPRYQVTQSGKPVTLSCSQNLNHKVMYWYQQKPSQAPKLLFHYYDKDFNNEA
DTPDNFQSRRPNTSFCFLDIRSPGLEDAAVYLCASSK
>V62RF-JABR01092448.1-trbv |(32724, 33024)|2.88625569424|(0.965,0.984,0.941)|1
SPGEEVTQTPKHLVKGEGQKAKLYCAPITGHSYVFWYQQVLKKEFKFLISFQNEDVVDET
QMPKERFSAKCPRNSPCSLEIQATKLKDSATYFCASSQ
>V63RF-JABR01092448.1-trbv |(49780, 50073)|2.79288979663|(0.953,0.928,0.919)|1
LSNAGITQNPRHLVRRRGQEARLRCSPMKGHSHVYWYQQLPEEGLKFMVYLQKEKIIDES
GMPKERFSAEFPKEGPSILRIQQAEQEDSAAYFCAS
>V64RF-JABR01092448.1-trbv |(70823, 71123)|2.89046151263|(0.995,0.923,0.993)|1
STDTKVTQRPRLLVKANEQKAKMECVPIKGHSYVYWYRKKLDEELKFLVYFQNEVIIQKA
EIINERFSAQCPQNSSCTLEIQSTESGDAALYFCASSK
>V65RF-JABR01092448.1-trbv |(79737, 80037)|2.99593600205|(1.000,0.996,1.000)|1
SFHAKVTQTPGYLVKGKGQKTKMDCTPEKGHTFVYWYQQNQNKEFTFLISFQSEQVLQET
ELHKKRFSSQCPKNPPCSLEILSSEPGDTALYLCASSQ
>V66RF-JABR01092448.1-trbv |(88946, 89244)|2.92919856051|(0.994,0.989,0.953)|1
SMDADVTQTPRNMIAKTGKRIMLECSQTKGHDQMYWYRQDPGLGLRLIYYSFDVKDINKG
EISDGYSVSRQEQAQFSLSLESATPNQTALYFCATSD
>V67RF-JABR01092448.1-trbv |(97426, 97723)|3.0|(1.000,1.000,1.000)|1
LMEADIYQNPRHRVIGTGKKITLECSQTMGHDKMYWYQQDPGMELHLIHYSYGVNSTERG
DFSSESTVSRIRIEHFPLTLESASPSHTSQYLCASSE
>V68RF-JABR01092448.1-trbv |(131672, 131969)|2.86776289014|(0.976,0.980,0.923)|1
PLEAQVTQNPRHLITVTGKKLTVTCSQNMNHEYMSWYRQDPGLGLRQIYYSINVEVIDKG
DIPEGYNVSRKEKTNFPLILESPSPSQTSLYLCASSL
>V69RF-JABR01092448.1-trbv |(137251, 137558)|2.97948011776|(0.996,0.985,0.999)|1
LVDVKVTQSSRHLIKRMGEKVFLECVQDMDHERMFWYRQDPGLGLQLIYFSYDVKVNEKG
DIPEGYSVSREKKERFSLILGSASTNQTSMYLCASSLSTA
>V70RF-JABR01094257.1-igkv |(834, 1136)|2.66830274972|(0.988,0.808,0.994)|1
SSGDIAMTQTPLSLPVTPGELASISCRSSQSLLHSDGKTYLNWYLQKPGQSPQLPIYTVS
NQASGVQERFSGSGSGTDFTLKISRVEAEDVGVYYCMQD
>V71RF-JABR01095741.1-trbv |(135018, 135328)|1.52068000536|(0.499,0.685,0.843)|1
SMDTGITQTPKYLVTGMGSKRMMKREHLGHDSLYWLREKAKKSLEFMFYYNCKELIENKT
VPSHFTPECPDSSRLYLHVFALQPEDSALYLCASSQDTALQ
>V72RF-JABR01095741.1-trbv |(145128, 145441)|2.69360590994|(0.993,0.998,0.818)|1
SLDTAVSQTPKYLVTQMGKKESLKCEQNLGHDTMYWYKQDSKKLLQIMFSYNNKELIINE
TVPNRISPDSPDKAHLILHIKSLELGDSAVYFCASSQGTALQ
>V73RF-JABR01095741.1-trbv |(149740, 150037)|2.97268883957|(0.998,0.980,0.996)|1
PTDAGVTQTPKHLVMGMTNKKSLKCEQHMGHRAMYWYKQKAKKPPEIMFMYNYEQLSINE
SVPSRFSPECSKSSLLNLHLQALQPEDSALYLCASSQ
>V74RF-JABR01095742.1-trbv |(5770, 6070)|2.97696800026|(0.991,0.993,0.993)|1
HTEPEVTQTPSHRVTQMGQEVILRCVPISNHLYFYWYRQILGQKVEFLVYFYNDEISEKS
EIFDDRFSVGRPDGSNFTLKIKSTKLEDSAMYFCASSE
>V75RF-JABR01095742.1-trbv |(13381, 13677)|2.3513778204|(0.925,0.994,0.674)|1
SLDTAVSQTPKYLVTQMGKKESLKCEQNLGHDAMYWYKQDSKKLLKIMFSYNNKELILNE
TVPNRISPDSPDKAHLILHIKSLELGDSAVYFCASTK
>V76RF-JABR01095742.1-trbv |(21882, 22173)|1.75541788698|(0.921,0.731,0.591)|1
PEVTQTPSHQVTRMGQEVILWCVPISNHFYFYWYRQILGQKVEFLVSFVNDNISEKSKIF
DDRFSVERPDGSNFTLKIKSTKLEDSAMYFCASSE
>V77RF-JABR01095742.1-trbv |(32732, 33020)|2.69749834867|(0.921,0.924,0.865)|1
TGVTQTPKHLVMGMTNKKSLKCEQHLRHNAMYWYKQKAKKPPELMFSFNYEKLSLNESVP
SRFSPECSKSSLLYLHVHALQPEDSALYLCASSQ
>V78RF-JABR01189674.1-iglv |(736, 1045)|3.0|(1.000,1.000,1.000)|1
SWAQSVLTQPPSASGAPGQSVTISCSGSSSNIRGNGVHWYQQLSGTAPKILIYNNNQRPS
GVPDRFSGSKSGTSASLAITGLRSEDEADYYCEAWDDSLSA
>V79RF-JABR01194774.1-igkv |(888, 1203)|2.08937426625|(0.980,0.582,0.998)|1
SSGDIVMTQTPLSLPVTPGEPASDSCRSSQSLLHSDGRTYLCWYLQKPGQPPRLLIYRVS
NRFSGVPDRFSGSGSGTDFTLKISRVEAEDVGVYYCMQALQTP
>V80RF-JABR01196792.1-trbv |(5405, 5708)|2.98692000218|(0.995,0.999,0.993)|1
SVFSALVSQKPSRDVCQRGTSVTIQCQVDSQVTMMFWYRQQPGQSLTLIATANQGSEATY
EGGFVIDKFPISRPNLTFSTLTVSNTSPEDSSIYLCSVE
>V81RF-JABR01004697.1-ighv |(11840, 12149)|3.0|(1.000,1.000,1.000)|-1
VQGEVQLVESGGGLVQPGGSLRLSCAASGFTFGDYAMSWVRQAPGKGLEWVSYISSASST
IYYADSVKGRFTISRDNAKNTLSLQMNNLRAEDTAVYYCAK
>V82RF-JABR01004697.1-ighv |(62563, 62872)|2.46326378359|(0.838,0.807,0.823)|-1
AQSQVQLVQSGAEVRKPGDSVKVSCKASGYTFTNHNVDWVRQAPGQGLVWMGGINTNTGG
TSCAQTFQGRVTMTRDTSTSTAFMELSCLRSEDTAVYYCAR
>V83RF-JABR01004697.1-ighv |(71645, 71954)|2.9488984707|(0.997,1.000,0.958)|-1
AHSQVQLVQSGAEIKQPGASVKVSCKASGYTFTSYYMHWVRQAPGQGLEWIGLISPYNGN
TGYAQNFQGRVTMTTDTSTSTGYMEMSSLRSEDTAVYYCTR
>V84RF-JABR01004698.1-ighv |(7380, 7689)|2.93153356618|(0.977,0.961,0.996)|-1
VQCELQLVESGGDLVQPGGYMRLSCAASGFTFSNYCISWVCQAPEKGLEWVSRINRDGSS
TYYADSMKGQVTISRENAKNTLYLQMNNLRAEDKAVYYCTR
>V85RF-JABR01004698.1-ighv |(16088, 16403)|3.0|(1.000,1.000,1.000)|-1
VQCEVQLVESGGGLVQPGGSLRLSCAASGFTFSSSAMHWVRQASGKGLEWVGRIRSKSNN
YATDYAASVKGRFTISRDDSKNTLYLQMNSLKTEDTAVYYCTT
>V86RF-JABR01011024.1-ighv |(77, 386)|2.99798400013|(1.000,0.998,1.000)|-1
VQCEVQLVESGGGLAKPAGSLRLSCAASGFTFSSYGMHWVRQAPGKGLEWVSYINSGGGS
TRYADSVKGRFTISRDNAKNTLYLQMDSLRAEDTAVYYCAR
[truncated: 48,487 more chars]
