# Supplementary material for: Iterative Variable Gene Discovery from Whole Genome Sequencing with a Bootstrapped Multiresolution Algorithm
Source: Comput Math Methods Med. 2019 Feb 11;2019:3780245. doi: 10.1155/2019/3780245 (PMC6388353; doi:10.1155/2019/3780245)
Supplement: Supplementary Materials — supp_materialsV2.pdf: this is an updated document, which includes new figures requested by the reviewer. sequences_alignments.zip: these are genome sequence files that are relevant for reproducing some of the results. [file 3780245.f1.zip › 3780245.f1/sequences_alignments/bstrp_iteration_3_r.dnd]

(
(
(
(
(
V31RF-CABD02136297.1-ighv:0.0135307
,
(
V198RF-AACZ03173117.1-ighv:0.00736515
,
(
V113RF-AACZ03107095.1-ighv:0.00488761
,
V161RF-AACZ03173011.1-ighv:0.00488761
):0.00247754
):0.0061656
):0.0379906
,
(
V123RF-CABD02117430.1-ighv:0.0384619
,
(
V109RF-ADFV01131948.1-ighv:0.0376885
,
(
(
V38RF-AJFE01045035.1-ighv:-0
,
V148RF-AACZ03171037.1-ighv:-0
):0.0246332
,
V50RF-ABGA01099938.1-ighv:0.0246332
):0.0130553
):0.000773441
):0.0130594
):0.0498841
,
(
(
V139RF-JYKQ01245900.1-ighv:0.0330278
,
(
V20RF-JABR01071886.1-ighv:0.0148668
,
V53RF-JABR01090264.1-ighv:0.0148668
):0.018161
):0.0393339
,
(
V19RF-JYKQ01005787.1-ighv:0.0741554
,
(
(
V90RF-AACZ03097900.1-ighv:0.0238367
,
(
V19RF-AHZZ01069455.1-ighv:0.022545
,
(
V16RF-AHZZ01069453.1-ighv:0.00984269
,
V16RF-JYKQ01005777.1-ighv:0.00984269
):0.0127023
):0.00129175
):0.0202466
,
(
V105RF-ADFV01131940.1-ighv:0.0357056
,
(
V184RF-AACZ03098103.1-ighv:0.035725
,
(
V252RF-AQIA01066387.1-ighv:0.0148668
,
(
V99RF-AQIB01153491.1-ighv:-0
,
V25RF-AHZZ01091600.1-ighv:-0
):0.0148668
):0.0208582
):-1.94013e-05
):0.00837778
):0.0300721
):-0.00179367
):0.0290437
):2.17765
,
(
(
V113RF-AGCE01148076.1-ighv:0.146979
,
(
(
V12RF-AHZZ01064628.1-ighv:0.0788281
,
(
(
V197RF-JYKQ01056018.1-ighv:0.033367
,
(
V121RF-AQIB01153517.1-ighv:0.0253837
,
V13RF-AHZZ01064636.1-ighv:0.0253837
):0.00798333
):0.0488476
,
(
V113RF-ADFV01131951.1-ighv:0.0591438
,
(
V78RF-ABGA01243343.1-ighv:0.0563982
,
(
V108RF-AACZ03098148.1-ighv:0.0562196
,
(
V129RF-CABD02117445.1-ighv:0.0655177
,
(
V140RF-JABR01077917.1-ighv:0.0636717
,
(
V28RF-ABGA01058270.1-ighv:0.0477254
,
(
V126RF-CABD02117439.1-ighv:0.0390202
,
(
V125RF-CABD02117438.1-ighv:0.036715
,
(
V37RF-AJFE01045032.1-ighv:0.0205777
,
V192RF-AACZ03171126.1-ighv:0.0205777
):0.0161373
):0.00230529
):0.00870521
):0.0159463
):0.00184601
):-0.00929812
):0.000178646
):0.00274558
):0.0230708
):-0.0033865
):0.0296833
,
(
(
V168RF-JYKQ01042840.1-ighv:0.0782523
,
(
(
(
V74RF-ABGA01194064.1-ighv:-0
,
V231RF-ABGA01360480.1-ighv:-0
):0.0204058
,
(
V130RF-CABD02117454.1-ighv:0.0100403
,
(
V159RF-AACZ03171037.1-ighv:-0
,
V182RF-AACZ03098100.1-ighv:-0
):0.0100403
):0.0103654
):0.0466527
,
(
(
V89RF-AQIB01153480.1-ighv:0.0364697
,
(
(
V175RF-AQIA01075834.1-ighv:0.0203681
,
V136RF-JYKQ01245888.1-ighv:0.0203681
):0.00527596
,
V71RF-AHZZ01129142.1-ighv:0.0256441
):0.0108257
):0.0222753
,
(
V214RF-AHZZ01103093.1-ighv:0.066048
,
(
(
V102RF-AQIB01153492.1-ighv:0.033875
,
(
V179RF-AQIA01075855.1-ighv:0.0259099
,
V249RF-AHZZ01112481.1-ighv:0.0259099
):0.00796517
):0.0281159
,
(
V62RF-AHZZ01110760.1-ighv:0.0688553
,
(
V26RF-AHZZ01091603.1-ighv:0.0547168
,
(
V161RF-AQIA01075818.1-ighv:0.0392164
,
(
V174RF-AQIA01075834.1-ighv:0.0351315
,
(
V253RF-AQIA01066387.1-ighv:0.0283987
,
(
V183RF-AQIA01075860.1-ighv:0.0201628
,
V186RF-AQIA01075862.1-ighv:0.0201628
):0.00823592
):0.00673279
):0.00408494
):0.0155003
):0.0141385
):-0.00686429
):0.00405706
):-0.00730302
):0.00831341
):0.0111939
):0.0152734
,
(
V111RF-AGCE01147923.1-ighv:0.102689
,
(
(
V200RF-AHZZ01090494.1-ighv:0.0337132
,
(
V209RF-AHZZ01096568.1-ighv:0.0100403
,
V220RF-AHZZ01103258.1-ighv:0.0100403
):0.0236729
):0.0503101
,
(
V241RF-AHZZ01108758.1-ighv:0.0889795
,
(
(
(
V47RF-ABGA01099934.1-ighv:0.0371586
,
(
V104RF-ABGA01313764.1-ighv:0.0270016
,
(
V104RF-AACZ03097916.1-ighv:0.0126039
,
(
V13RF-ABGA01037228.1-ighv:0.00498507
,
V16RF-ABGA01044304.1-ighv:0.00498507
):0.00761883
):0.0143977
):0.010157
):0.0123054
,
(
V159RF-ABGA01203422.1-ighv:0.0468887
,
(
V20RF-AHZZ01069455.1-ighv:0.0501795
,
(
V108RF-AQIB01153507.1-ighv:0.0344696
,
(
V128RF-JYKQ01245876.1-ighv:0.0225201
,
(
V20RF-JYKQ01005788.1-ighv:0.0272878
,
(
V163RF-AQIA01075821.1-ighv:0.0178726
,
(
V215RF-AHZZ01103093.1-ighv:0.00503527
,
V219RF-AHZZ01103097.1-ighv:0.00503527
):0.0128373
):0.0094152
):-0.00476767
):0.0119495
):0.0157099
):-0.00329086
):0.0025753
):0.0233996
,
(
V30RF-ABGA01058270.1-ighv:0.089837
,
(
V11RF-AHZZ01064625.1-ighv:0.0903557
,
(
V122RF-AQIB01153522.1-ighv:0.0754734
,
(
(
(
V44RF-AJFE01045051.1-ighv:0.00503527
,
V94RF-AACZ03097904.1-ighv:0.00503527
):0.0208943
,
(
V141RF-CABD02117482.1-ighv:0.0201628
,
V95RF-AACZ03097905.1-ighv:0.0201628
):0.00576681
):0.0357089
,
(
V35RF-AHZZ01098942.1-ighv:0.0616307
,
(
(
V176RF-AQIA01075844.1-ighv:0.0203681
,
V21RF-JABR01074704.1-ighv:0.0203681
):0.045999
,
(
V159RF-JYKQ01015003.1-ighv:0.0673704
,
(
V117RF-ADFV01131957.1-ighv:0.052718
,
(
V106RF-ADFV01131940.1-ighv:0.0492833
,
(
V175RF-AHZZ01069461.1-ighv:0.0495719
,
(
V61RF-ABGA01104800.1-ighv:0.0508657
,
(
V139RF-JABR01077916.1-ighv:0.0528222
,
(
V54RF-JABR01091180.1-ighv:0.0581417
,
(
V230RF-AQIB01153518.1-ighv:0.0407289
,
(
V130RF-AQIB01153550.1-ighv:0.0484759
,
(
V182RF-AQIA01075859.1-ighv:0.0437463
,
(
(
(
V101RF-ABGA01313761.1-ighv:0.0101422
,
V111RF-ADFV01131950.1-ighv:0.0101422
):0.0091217
,
(
V62RF-ABGA01104801.1-ighv:0.01795
,
(
V14RF-ABGA01044302.1-ighv:0.0153224
,
V17RF-ABGA01044305.1-ighv:0.0153224
):0.00262765
):0.00131382
):0.0191986
,
(
V107RF-AACZ03098146.1-ighv:0.0448207
,
(
V18RF-ABGA01044306.1-ighv:0.0394544
,
(
(
V181RF-AQIA01075857.1-ighv:0.00984269
,
V78RF-JYKQ01067101.1-ighv:0.00984269
):0.0390018
,
(
V91RF-JABR01035060.1-ighv:0.030143
,
(
V156RF-AQIA01075814.1-ighv:0.0330691
,
(
V36RF-AHZZ01098950.1-ighv:0.0215575
,
(
V180RF-AQIA01075856.1-ighv:0.0322716
,
(
V173RF-AQIA01075832.1-ighv:0.0284876
,
(
V170RF-AQIA01075832.1-ighv:0.0153224
,
V20RF-ABGA01044307.1-ighv:0.0153224
):0.0131652
):0.00378401
):-0.0107141
):0.0115116
):-0.00292611
):0.0187015
):-0.00939011
):0.0053663
):-0.00635818
):0.00528385
):0.00472955
):-0.00774699
):0.0174128
):-0.00531951
):-0.00195645
):-0.00129385
):-0.000288561
):0.00343472
):0.0146524
):-0.00100328
):-0.00473642
):7.77468e-06
):0.0138349
):0.0148823
):-0.000518754
):-0.0169734
):0.0161159
):-0.00495617
):0.0186656
):-0.00916323
):0.0149856
):0.0384679
):2.05294
,
(
(
(
(
(
V72RF-ABGA01174999.1-ighv:0.125513
,
(
V236RF-AQIA01066360.1-ighv:0.0912649
,
V251RF-AQIA01066387.1-ighv:0.0912649
):0.0342484
):0.012254
,
(
V29RF-ABGA01058270.1-ighv:0.124774
,
(
V10RF-JYKQ01005773.1-ighv:0.04078
,
(
V141RF-AQIB01153561.1-ighv:0.0269823
,
(
(
V188RF-AQIA01075862.1-ighv:0.0203681
,
V65RF-AHZZ01113072.1-ighv:0.0203681
):0
,
V3RF-JYKQ01005763.1-ighv:0.0203681
):0.00661423
):0.0137977
):0.0839938
):0.0129933
):0.0761795
,
(
(
(
V238RF-AQIA01066362.1-ighv:-0
,
V242RF-AQIA01066369.1-ighv:-0
):0.0309971
,
V13RF-JYKQ01005774.1-ighv:0.0309971
):0.231904
,
(
(
V137RF-AQIB01153556.1-ighv:0.0715773
,
V7RF-JYKQ01005771.1-ighv:0.0715773
):0.143948
,
(
(
V32RF-CABD02136313.1-ighv:0.0692861
,
V120RF-ADFV01131961.1-ighv:0.0692861
):0.104976
,
(
(
V197RF-AQIB01086294.1-ighv:0.0259099
,
V76RF-JYKQ01067073.1-ighv:0.0259099
):0.155242
,
(
V84RF-JABR01004698.1-ighv:0.167967
,
(
V12RF-ABDC01282065.1-ighv:0.148772
,
(
V34RF-AQIA01007915.1-ighv:0.15277
,
(
V133RF-CABD02117467.1-ighv:0.105623
,
(
(
V1RF-AJFE01003265.1-ighv:-0
,
V112RF-AACZ03106490.1-ighv:-0
):0.0845809
,
(
V67RF-AGCE01147875.1-ighv:0.0670216
,
V9RF-AHZZ01064615.1-ighv:0.0670216
):0.0175593
):0.0210424
):0.0471471
):-0.00399849
):0.0191949
):0.0131849
):-0.00688972
):0.0412634
):0.0473755
):-0.0489543
):0.94108
,
(
(
(
(
V87RF-AACZ03097899.1-ighv:0.106305
,
(
(
V2RF-JYKQ01005758.1-ighv:0.0451859
,
(
V90RF-JABR01035060.1-ighv:0.0174141
,
(
V132RF-AQIB01153553.1-ighv:0.0148668
,
V49RF-AHZZ01104761.1-ighv:0.0148668
):0.00254736
):0.0277718
):0.0561
,
(
V5RF-JYKQ01005769.1-ighv:0.0855735
,
(
V18RF-JABR01070187.1-ighv:0.086565
,
(
(
V65RF-ABDC01407894.1-ighv:0.0410805
,
V10RF-JABR01059011.1-ighv:0.0410805
):0.0303023
,
(
V116RF-AGCE01148199.1-ighv:0.055597
,
(
V3RF-ABGA01025791.1-ighv:0.0465544
,
V88RF-JABR01035059.1-ighv:0.0465544
):0.00904256
):0.0157859
):0.0151822
):-0.000991449
):0.0157124
):0.00501932
):0.0637281
,
(
V58RF-AGCE01147750.1-ighv:0.180351
,
(
(
(
V131RF-CABD02117457.1-ighv:0.0101422
,
V103RF-AACZ03097912.1-ighv:0.0101422
):0.0770352
,
(
(
V187RF-AQIA01075862.1-ighv:0.0475384
,
V141RF-JABR01077917.1-ighv:0.0475384
):0.0248176
,
(
V67RF-ABGA01174988.1-ighv:0.0589883
,
V92RF-JABR01035060.1-ighv:0.0589883
):0.0133677
):0.0148213
):0.0574843
,
(
V0RF-ABDC01047890.1-ighv:0.155365
,
(
V10RF-ABGA01025808.1-ighv:0.134325
,
(
(
V132RF-CABD02117463.1-ighv:0.067093
,
(
V105RF-AQIB01153501.1-ighv:0.058362
,
V126RF-JYKQ01245874.1-ighv:0.058362
):0.00873104
):0.0554208
,
(
(
(
V118RF-AQIB01153511.1-ighv:0.0151675
,
V212RF-AHZZ01096574.1-ighv:0.0151675
):0.0526543
,
(
V136RF-AQIB01153555.1-ighv:0.0589883
,
V181RF-AHZZ01084892.1-ighv:0.0589883
):0.00883342
):0.0392406
,
(
V56RF-ABGA01099946.1-ighv:0.136363
,
(
V65RF-AGCE01147870.1-ighv:0.11909
,
(
(
V89RF-JABR01035059.1-ighv:0.0735438
,
(
V115RF-AGCE01148188.1-ighv:0.076914
,
(
(
(
V184RF-AQIA01075862.1-ighv:0.0309971
,
V131RF-AQIB01153553.1-ighv:0.0309971
):0.0054321
,
V23RF-AHZZ01091599.1-ighv:0.0364292
):0.0090527
,
(
V46RF-JYKQ01041718.1-ighv:0.0364292
,
V251RF-JYKQ01237599.1-ighv:0.0364292
):0.0090527
):0.031432
):-0.00337019
):0.0185869
,
(
V15RF-JABR01066987.1-ighv:0.0823344
,
(
V12RF-ABGA01025810.1-ighv:0.0844702
,
(
(
V172RF-AQIA01075832.1-ighv:0.0151675
,
V138RF-JYKQ01245890.1-ighv:0.0151675
):0.0731088
,
(
V55RF-JABR01091180.1-ighv:0.0807488
,
(
V25RF-ABGA01044314.1-ighv:0.0837835
,
(
V114RF-AQIB01153509.1-ighv:0.0532197
,
V173RF-AHZZ01069458.1-ighv:0.0532197
):0.0305637
):-0.00303465
):0.00752746
):-0.00380604
):-0.00213581
):0.00979628
):0.0269592
):0.0172732
):-0.0293007
):0.0154514
):0.0118109
):0.0210398
):-0.0107029
):0.035689
):-0.0103173
):0.442175
,
(
(
(
V51RF-AJFE01045053.1-ighv:-0
,
V105RF-AACZ03097919.1-ighv:-0
):0.143538
,
(
V9RF-ABDC01282056.1-ighv:0.10077
,
(
V150RF-AACZ03171037.1-ighv:0.0622114
,
(
V8RF-ABGA01025808.1-ighv:0.0504653
,
(
V5RF-ABGA01025797.1-ighv:0.0364292
,
V57RF-ABGA01099947.1-ighv:0.0364292
):0.0140361
):0.0117461
):0.0385588
):0.042768
):0.0434402
,
(
(
V41RF-JYKQ01041713.1-ighv:0.148767
,
(
V24RF-AHZZ01091599.1-ighv:0.143056
,
(
(
V110RF-AQIB01153507.1-ighv:0.0573883
,
(
V90RF-AQIB01153481.1-ighv:0.0614419
,
(
(
V4RF-AJFE01011110.1-ighv:0.0251285
,
V6RF-ABGA01025808.1-ighv:0.0251285
):0.0187489
,
(
V254RF-AQIA01066395.1-ighv:0.0383834
,
(
V40RF-JYKQ01041713.1-ighv:0.0304258
,
(
V56RF-JABR01091180.1-ighv:0.0174141
,
(
V166RF-AQIA01075825.1-ighv:0.0148668
,
V85RF-JABR01004698.1-ighv:0.0148668
):0.00254736
):0.0130117
):0.00795753
):0.00549401
):0.0175645
):-0.00405353
):0.0523611
,
(
(
(
V227RF-AQIB01145361.1-ighv:-0
,
V228RF-AQIB01145362.1-ighv:-0
):0.00994053
,
V39RF-AHZZ01100290.1-ighv:0.00994053
):0.0910192
,
(
(
V148RF-CABD02117545.1-ighv:0.0251285
,
V110RF-AACZ03102011.1-ighv:0.0251285
):0.0370799
,
(
(
V15RF-JYKQ01005777.1-ighv:0.0150516
,
(
V235RF-AQIA01066360.1-ighv:0.00994053
,
V15RF-AHZZ01069451.1-ighv:0.00994053
):0.00511111
):0.0335853
,
(
V22RF-JABR01074958.1-ighv:0.0433464
,
(
V158RF-AQIA01075814.1-ighv:0.0307188
,
(
V135RF-AQIB01153555.1-ighv:0.027749
,
(
V145RF-CABD02117494.1-ighv:0.0148668
,
V88RF-AACZ03097900.1-ighv:0.0148668
):0.0128822
):0.00296981
):0.0126277
):0.00529052
):0.0135714
):0.0387513
):0.00878967
):0.0333069
):0.00571027
):0.0154003
,
(
(
V180RF-AHZZ01084892.1-ighv:0.0829307
,
(
(
V117RF-AQIB01153511.1-ighv:0.0148668
,
V135RF-JYKQ01245888.1-ighv:0.0148668
):0.0627218
,
(
(
V18RF-AHZZ01069455.1-ighv:0.0356862
,
V18RF-JYKQ01005787.1-ighv:0.0356862
):0.0276792
,
(
V200RF-JYKQ01062881.1-ighv:0.0363605
,
(
V199RF-AHZZ01090492.1-ighv:0.0424893
,
(
V250RF-AHZZ01125719.1-ighv:0.027749
,
(
V91RF-AQIB01153482.1-ighv:0.0251285
,
V113RF-AQIB01153509.1-ighv:0.0251285
):0.00262048
):0.0147403
):-0.00612878
):0.0270049
):0.0142232
):0.0053421
):0.0417946
,
(
V17RF-ABDC01314388.1-ighv:0.114758
,
(
(
(
V140RF-AQIB01153558.1-ighv:0.0150156
,
V177RF-AHZZ01084890.1-ighv:0.0150156
):0.0301168
,
(
V148RF-ADFV01143437.1-ighv:0.0344297
,
(
V131RF-JYKQ01245881.1-ighv:0.0265025
,
(
V144RF-AQIB01153566.1-ighv:0.0200621
,
(
V240RF-AQIA01066366.1-ighv:0.0175892
,
(
V239RF-AQIA01066362.1-ighv:0.00488761
,
(
V14RF-AHZZ01069449.1-ighv:-0
,
V14RF-JYKQ01005774.1-ighv:-0
):0.00488761
):0.0127016
):0.00247294
):0.00644039
):0.00792719
):0.0107027
):0.0331572
,
(
V43RF-ABDC01375549.1-ighv:0.0719806
,
(
(
V144RF-CABD02117492.1-ighv:0.0303695
,
V89RF-AACZ03097900.1-ighv:0.0303695
):0.0291217
,
(
V9RF-ABGA01025808.1-ighv:0.0570218
,
(
(
V58RF-ABGA01099948.1-ighv:0.0397518
,
(
V53RF-ABGA01099941.1-ighv:0.027749
,
(
V122RF-CABD02117421.1-ighv:0.0199615
,
V151RF-AACZ03171037.1-ighv:0.0199615
):0.00778747
):0.0120029
):0.0126968
,
(
(
(
V47RF-AJFE01045051.1-ighv:-0
,
V98RF-AACZ03097906.1-ighv:-0
):0.0303695
,
V137RF-CABD02117473.1-ighv:0.0303695
):0.0194879
,
(
(
V31RF-ABGA01058273.1-ighv:0.00488761
,
V71RF-ABGA01174999.1-ighv:0.00488761
):0.0460518
,
(
V114RF-ADFV01131954.1-ighv:0.027749
,
(
V245RF-AQIA01066385.1-ighv:0.0199615
,
V97RF-AQIB01153486.1-ighv:0.0199615
):0.00778747
):0.0231904
):-0.00108206
):0.00259128
):0.00457318
):0.00246935
):0.0124894
):0.00630906
):0.0364686
):0.00996716
):0.0394415
):0.0228115
):0.442175
):0.23824
,
(
(
(
(
V24RF-ABGA01044313.1-ighv:0.0521098
,
V107RF-ADFV01131944.1-ighv:0.0521098
):0.0456025
,
(
V2RF-ABGA01025790.1-ighv:0.10358
,
(
V73RF-ABGA01194059.1-ighv:0.075189
,
V57RF-JABR01091180.1-ighv:0.075189
):0.0283909
):-0.0058676
):0.055148
,
(
(
V6RF-ABDC01231272.1-ighv:0.0602823
,
V11RF-ABDC01282063.1-ighv:0.0602823
):0.0538268
,
(
(
(
(
V259RF-AQIA01073275.1-ighv:0.00498507
,
V134RF-JYKQ01245886.1-ighv:0.00498507
):0.0513433
,
(
(
V231RF-AQIB01158235.1-ighv:0.0201628
,
V130RF-JYKQ01245880.1-ighv:0.0201628
):0.0276336
,
(
V138RF-AQIB01153557.1-ighv:0.0365103
,
(
V6RF-JYKQ01005770.1-ighv:0.0283987
,
(
V193RF-AQIA01075868.1-ighv:0.0203681
,
V179RF-AHZZ01084892.1-ighv:0.0203681
):0.00803057
):0.00811157
):0.0112861
):0.00853205
):0.0429521
,
(
(
V81RF-JABR01004697.1-ighv:0.0621901
,
(
V104RF-AQIB01153501.1-ighv:0.0256441
,
V48RF-JYKQ01041718.1-ighv:0.0256441
):0.036546
):0.0250359
,
(
V11RF-JABR01059011.1-ighv:0.0843434
,
(
(
V92RF-AQIB01153482.1-ighv:0.0391858
,
(
V159RF-AQIA01075814.1-ighv:0.0309971
,
V246RF-AQIA01066387.1-ighv:0.0309971
):0.00818864
):0.0442836
,
(
V117RF-AJFE01045447.1-ighv:0.0772386
,
(
V118RF-AGCE01148386.1-ighv:0.0735886
,
(
(
V168RF-AQIA01075827.1-ighv:0.00503527
,
V251RF-AHZZ01125719.1-ighv:0.00503527
):0.0809917
,
(
V86RF-JABR01011024.1-ighv:0.0603396
,
(
V71RF-AGCE01148057.1-ighv:0.0588102
,
(
(
V218RF-AHZZ01103097.1-ighv:0.0364292
,
V138RF-JABR01077916.1-ighv:0.0364292
):0.0208529
,
(
V120RF-CABD02117419.1-ighv:0.0539161
,
(
(
V112RF-ADFV01131951.1-ighv:0.0151675
,
V123RF-ADFV01131961.1-ighv:0.0151675
):0.0447726
,
(
V115RF-ADFV01131956.1-ighv:0.0494592
,
(
(
V197RF-AHZZ01090491.1-ighv:0.0151675
,
V198RF-JYKQ01062878.1-ighv:0.0151675
):0.0304352
,
(
V117RF-ABGA01384193.1-ighv:0.039206
,
(
V121RF-CABD02117420.1-ighv:0.0283206
,
(
V42RF-AJFE01045041.1-ighv:0.0151675
,
V152RF-AACZ03171037.1-ighv:0.0151675
):0.0131532
):0.0108854
):0.00639665
):0.00385655
):0.0104808
):-0.00602392
):0.00336609
):0.00152801
):0.00152936
):0.0256874
):-0.0124383
):0.00364995
):0.0062308
):0.00087405
):0.00288253
):0.0120545
):0.0189474
,
(
V11RF-JZKE01244709.1-ighv:0.126503
,
(
(
V9RF-JZKE01244686.1-ighv:0.108441
,
(
V10RF-JZKE01244690.1-ighv:0.076506
,
(
(
V116RF-CABD02117395.1-ighv:0.0334453
,
(
V129RF-AQIB01153543.1-ighv:0.0150156
,
V216RF-AHZZ01103094.1-ighv:0.0150156
):0.0184297
):0.0289433
,
(
V74RF-ABDC01423814.1-ighv:0.0642696
,
(
V119RF-CABD02117416.1-ighv:0.0612743
,
(
(
V80RF-JYKQ01086555.1-ighv:0.0203681
,
V140RF-JYKQ01245904.1-ighv:0.0203681
):0.0209263
,
(
V123RF-AQIB01153537.1-ighv:0.0363112
,
(
V43RF-AJFE01045048.1-ighv:0.0203681
,
V102RF-AACZ03097910.1-ighv:0.0203681
):0.0159431
):0.00498324
):0.0199798
):0.0029953
):-0.00188101
):0.0141174
):0.0319347
):-0.00675111
,
(
(
V119RF-AQIB01153511.1-ighv:0.0604641
,
(
(
V21RF-AHZZ01069456.1-ighv:0.00498507
,
V21RF-JYKQ01005789.1-ighv:0.00498507
):0.0512305
,
(
(
V243RF-AQIA01066378.1-ighv:0.0203681
,
V9RF-JYKQ01005772.1-ighv:0.0203681
):0.0271703
,
V96RF-AQIB01153485.1-ighv:0.0475384
):0.00867708
):0.00424857
):0.0383292
,
(
(
(
V66RF-AGCE01147874.1-ighv:0.0423869
,
V196RF-JYKQ01056010.1-ighv:0.0423869
):0.0225606
,
(
(
V55RF-ABGA01099946.1-ighv:0.0423869
,
V118RF-CABD02117398.1-ighv:0.0423869
):0.0143575
,
(
(
(
V34RF-CABD02136430.1-ighv:-0
,
V151RF-CABD02136430.1-ighv:-0
):0.0127323
,
(
V168RF-AACZ03179884.1-ighv:0.00503527
,
V197RF-AACZ03172650.1-ighv:0.00503527
):0.00769702
):0.0412337
,
(
V19RF-JABR01070187.1-ighv:0.0232438
,
(
V162RF-AQIA01075820.1-ighv:0.0153224
,
V127RF-JYKQ01245874.1-ighv:0.0153224
):0.00792139
):0.0307222
):0.00277847
):0.00820316
):0.0428266
,
(
V90RF-JZKE01278602.1-ighv:0.130285
,
(
(
V113RF-ABDC01345813.1-ighv:0.0758949
,
(
(
V106RF-AACZ03098145.1-ighv:0.0309971
,
V109RF-AACZ03098176.1-ighv:0.0309971
):0.012407
,
(
V79RF-ABGA01243345.1-ighv:0.0364292
,
V128RF-CABD02117444.1-ighv:0.0364292
):0.00697492
):0.0324907
):0.0120332
,
(
(
V85RF-JZKE01278271.1-ighv:0.0710084
,
(
V136RF-CABD02117471.1-ighv:0.0391858
,
(
V115RF-AJFE01045439.1-ighv:0.0151675
,
V155RF-AACZ03171037.1-ighv:0.0151675
):0.0240183
):0.0318226
):0.0178702
,
(
V72RF-ABDC01421861.1-ighv:0.0802452
,
(
V130RF-ABDC01471087.1-ighv:0.0615271
,
(
(
V42RF-ABDC01375549.1-ighv:-0
,
V83RF-ABDC01454767.1-ighv:-0
):0.051122
,
(
V60RF-AGCE01147864.1-ighv:0.0468389
,
(
V109RF-AQIB01153507.1-ighv:0.0378075
,
(
(
(
V3RF-AJFE01011110.1-ighv:-0
,
V86RF-AACZ03097899.1-ighv:-0
):0.00498507
,
V146RF-CABD02117499.1-ighv:0.00498507
):0.0287281
,
(
V165RF-AQIA01075825.1-ighv:0.0256441
,
V129RF-JYKQ01245876.1-ighv:0.0256441
):0.00806913
):0.00409432
):0.00903141
):0.00428307
):0.0104051
):0.0187181
):0.00863349
):-0.000950642
):0.0423572
):-0.022511
):-0.00898082
):0.00289617
):0.0248135
):-0.00827511
):-0.00411873
):0.0387511
):0.460621
,
(
(
(
V161RF-AJFE01119883.1-ighv:0.0586455
,
(
V111RF-AQIB01153507.1-ighv:0.0425082
,
(
V7RF-ABGA01025808.1-ighv:0.027749
,
(
V190RF-AQIA01075865.1-ighv:0.0251285
,
V182RF-AHZZ01084893.1-ighv:0.0251285
):0.00262048
):0.0147592
):0.0161373
):0.0371477
,
(
V54RF-ABGA01099945.1-ighv:0.113215
,
(
V62RF-AGCE01147865.1-ighv:0.113324
,
(
(
V74RF-AHZZ01150255.1-ighv:0.0356862
,
V211RF-AHZZ01096572.1-ighv:0.0356862
):0.0319239
,
(
V96RF-JABR01049702.1-ighv:0.0722963
,
(
V100RF-JABR01063291.1-ighv:0.0678615
,
(
(
V7RF-ABDC01231274.1-ighv:0.0199615
,
V67RF-ABDC01417489.1-ighv:0.0199615
):0.0480979
,
(
V192RF-AQIA01075867.1-ighv:0.0585773
,
(
V171RF-JYKQ01042861.1-ighv:0.0357056
,
(
V167RF-AQIA01075826.1-ighv:0.0467369
,
(
V257RF-AQIA01066397.1-ighv:0.0251655
,
(
V255RF-AQIA01066395.1-ighv:0.0148668
,
V42RF-JYKQ01041713.1-ighv:0.0148668
):0.0102987
):0.0215714
):-0.0110313
):0.0228717
):0.00948209
):-0.000197843
):0.00443482
):-0.0046862
):0.0457142
):-0.000108913
):-0.0174222
):0.0521667
,
(
(
(
V118RF-AJFE01045453.1-ighv:0.0419423
,
V104RF-ADFV01131940.1-ighv:0.0419423
):0.0191908
,
(
V152RF-CABD02136430.1-ighv:0.01795
,
(
V169RF-AACZ03182257.1-ighv:0.00503527
,
V196RF-AACZ03172648.1-ighv:0.00503527
):0.0129148
):0.0431831
):0.0527964
,
(
(
V8RF-ABDC01231277.1-ighv:0.0962874
,
(
V68RF-AGCE01147944.1-ighv:0.082343
,
(
V40RF-AJFE01045037.1-ighv:0.0619517
,
(
V191RF-AQIA01075867.1-ighv:0.0562155
,
(
V164RF-AQIA01075823.1-ighv:0.0337132
,
(
V249RF-AQIA01066387.1-ighv:0.0203681
,
V50RF-AHZZ01104763.1-ighv:0.0203681
):0.0133451
):0.0225023
):0.00573615
):0.0203914
):0.0139444
):0.0237642
,
(
(
(
V80RF-JZKE01278253.1-ighv:0.0364292
,
V96RF-JZKE01278611.1-ighv:0.0364292
):0.0360463
,
(
V88RF-JZKE01278277.1-ighv:0.0475384
,
V95RF-JZKE01278610.1-ighv:0.0475384
):0.0249371
):0.0506175
,
(
V127RF-CABD02117442.1-ighv:0.128174
,
(
(
V82RF-JZKE01278267.1-ighv:0.0810818
,
(
V13RF-JZKE01244715.1-ighv:0.0833451
,
(
V79RF-JZKE01278249.1-ighv:0.0723945
,
(
V30RF-JZKE01255160.1-ighv:0.0775771
,
(
V87RF-JZKE01278276.1-ighv:0.0529594
,
(
V97RF-JZKE01278611.1-ighv:0.0532792
,
(
V94RF-JZKE01278610.1-ighv:0.0515198
,
(
V86RF-JZKE01278273.1-ighv:0.0504643
,
(
(
V70RF-JZKE01235368.1-ighv:0.0151675
,
V81RF-JZKE01278255.1-ighv:0.0151675
):0.0304088
,
(
V93RF-JZKE01278609.1-ighv:0.0421084
,
(
V83RF-JZKE01278268.1-ighv:0.0256441
,
V92RF-JZKE01278607.1-ighv:0.0256441
):0.0164644
):0.00346779
):0.00488803
):0.00105555
):0.00175943
):-0.000319798
):0.0246176
):-0.00518262
):0.0109507
):-0.00226335
):0.0157832
,
(
(
V98RF-JZKE01278614.1-ighv:0.0531193
,
(
V89RF-JZKE01278602.1-ighv:0.0470928
,
(
V78RF-JZKE01278248.1-ighv:0.0410145
,
(
V76RF-JZKE01255181.1-ighv:0.0337132
,
(
V12RF-JZKE01244710.1-ighv:0.0309971
,
V91RF-JZKE01278605.1-ighv:0.0309971
):0.00271605
):0.00730135
):0.00607828
):0.00602645
):0.0543123
,
(
(
V48RF-AHZZ01104760.1-ighv:0.0614942
,
(
(
V60RF-ABGA01099956.1-ighv:0.0434665
,
(
V237RF-AQIA01066360.1-ighv:0.0283987
,
(
V17RF-AHZZ01069455.1-ighv:0.0151675
,
V17RF-JYKQ01005784.1-ighv:0.0151675
):0.0132312
):0.0150678
):0.0159588
,
(
V93RF-AQIB01153482.1-ighv:0.0364292
,
V178RF-AHZZ01084890.1-ighv:0.0364292
):0.022996
):0.00206889
):0.0427996
,
(
(
V194RF-AQIA01075868.1-ighv:0.0313208
,
V139RF-AQIB01153557.1-ighv:0.0313208
):0.0826426
,
(
(
V27RF-ABGA01044319.1-ighv:0.0475384
,
V153RF-AACZ03171037.1-ighv:0.0475384
):0.0419049
,
(
(
(
V4RF-ABDC01231268.1-ighv:0.00503527
,
V133RF-ABDC01493416.1-ighv:0.00503527
):0.0416721
,
(
V44RF-ABDC01377237.1-ighv:0.0423949
,
(
V10RF-ABDC01282057.1-ighv:0.0259099
,
V41RF-ABDC01373301.1-ighv:0.0259099
):0.016485
):0.00431246
):0.0485583
,
(
(
V114RF-ABDC01345814.1-ighv:0.0154805
,
V115RF-ABDC01345817.1-ighv:0.0154805
):0.0710422
,
(
V40RF-ABDC01373300.1-ighv:0.0896797
,
(
V52RF-ABGA01099941.1-ighv:0.080167
,
(
V21RF-ABGA01044310.1-ighv:0.0688342
,
(
(
V139RF-CABD02117477.1-ighv:0.0259099
,
V58RF-ADFV01136793.1-ighv:0.0259099
):0.0387257
,
(
V110RF-ADFV01131950.1-ighv:0.0709172
,
(
V122RF-ABDC01396906.1-ighv:0.0714898
,
(
V112RF-AQIB01153509.1-ighv:0.0630188
,
(
V158RF-ABGA01203420.1-ighv:0.0692171
,
(
(
(
V7RF-AJFE01011113.1-ighv:-0
,
V93RF-AACZ03097900.1-ighv:-0
):0.0299681
,
(
V143RF-CABD02117487.1-ighv:0.0127323
,
(
(
V45RF-AJFE01045051.1-ighv:-0
,
V96RF-AACZ03097906.1-ighv:-0
):0.00503527
,
V92RF-AACZ03097900.1-ighv:0.00503527
):0.00769702
):0.0172358
):0.0315359
,
(
V77RF-JZKE01255182.1-ighv:0.0546383
,
(
V84RF-JZKE01278271.1-ighv:0.0581759
,
(
V133RF-AQIB01153553.1-ighv:0.0524221
,
(
V41RF-AJFE01045037.1-ighv:0.0557797
,
(
V137RF-JYKQ01245889.1-ighv:0.0355649
,
(
V171RF-AQIA01075832.1-ighv:0.0312907
,
(
V44RF-JYKQ01041713.1-ighv:0.0246354
,
(
V210RF-AHZZ01096568.1-ighv:0.0231598
,
(
V247RF-AQIA01066387.1-ighv:0.0153224
,
V174RF-AHZZ01069458.1-ighv:0.0153224
):0.00783738
):0.00147566
):0.00665524
):0.0042742
):0.0202149
):-0.00335768
):0.00575383
):-0.00353762
):0.00686569
):0.00771311
):-0.00619826
):0.00847097
):-0.000572547
):-0.00628164
):0.00419857
):0.0113329
):0.00951263
):-0.00315695
):0.00874287
):-0.00582223
):0.0245201
):-0.00966968
):0.00313783
):-0.0105667
):0.031309
):-0.00508091
):-0.00304142
):-0.00612214
):0.0340304
):0.460621
):0.219793
):0.260666
):1.09183
,
(
(
V110RF-AGCE01147919.1-ighv:0.178102
,
(
(
V49RF-ABGA01099935.1-ighv:-0
,
V227RF-ABGA01354649.1-ighv:-0
):0.101336
,
(
(
(
V169RF-AQIA01075830.1-ighv:0.030008
,
(
V13RF-JABR01059012.1-ighv:0.0285903
,
(
(
(
V70RF-AHZZ01124687.1-ighv:-0
,
V252RF-AHZZ01125719.1-ighv:-0
):0
,
V253RF-AHZZ01181503.1-ighv:-0
):0.0153224
,
V132RF-JYKQ01245882.1-ighv:0.0153224
):0.0132679
):0.00141766
):0.0203554
,
(
(
V102RF-ADFV01131938.1-ighv:-0
,
V103RF-ADFV01131939.1-ighv:-0
):0.0419839
,
(
V124RF-CABD02117431.1-ighv:0.0203681
,
V158RF-AACZ03171037.1-ighv:0.0203681
):0.0216157
):0.0083795
):0.0252017
,
(
(
V256RF-AQIA01066397.1-ighv:0.0100403
,
V39RF-JYKQ01041707.1-ighv:0.0100403
):0.0397789
,
(
V0RF-ABGA01025787.1-ighv:0.0243251
,
(
V147RF-CABD02117506.1-ighv:0.0075127
,
(
V2RF-AJFE01011107.1-ighv:0.00498507
,
V85RF-AACZ03097899.1-ighv:0.00498507
):0.00252764
):0.0168124
):0.0254942
):0.0257458
):0.0257711
):0.076766
):1.7129
,
(
(
(
V59RF-AGCE01147864.1-ighv:0.0259099
,
V73RF-AGCE01148231.1-ighv:0.0259099
):0.0363485
,
(
(
(
V46RF-AJFE01045051.1-ighv:-0
,
V97RF-AACZ03097906.1-ighv:-0
):0.0205777
,
V138RF-CABD02117475.1-ighv:0.0205777
):0.0345811
,
(
(
V142RF-AQIB01153564.1-ighv:0.0256441
,
V143RF-AQIB01153565.1-ighv:0.0256441
):0.0316874
,
(
(
V59RF-ABGA01099955.1-ighv:0.0102461
,
V115RF-ABGA01362157.1-ighv:0.0102461
):0.0452862
,
(
(
(
V11RF-JYKQ01005773.1-ighv:-0
,
V12RF-JYKQ01005774.1-ighv:-0
):0.0246364
,
(
V241RF-AQIA01066369.1-ighv:0.03126
,
(
V176RF-AHZZ01084887.1-ighv:0.0153224
,
V116RF-ADFV01131956.1-ighv:0.0153224
):0.0159376
):-0.00662362
):0.0103668
,
(
(
V93RF-JABR01035060.1-ighv:0.00503527
,
V206RF-JABR01190886.1-ighv:0.00503527
):0.0273378
,
(
V4RF-JYKQ01005763.1-ighv:0.0286252
,
(
V23RF-ABGA01044310.1-ighv:0.0272823
,
(
V134RF-AQIB01153555.1-ighv:0.0230061
,
(
V189RF-AQIA01075862.1-ighv:0.0151675
,
V183RF-AHZZ01084896.1-ighv:0.0151675
):0.00783863
):0.00427622
):0.00134289
):0.0037479
):0.00263006
):0.0205291
):0.00179917
):-0.00217262
):0.00709955
):1.16584
,
(
(
(
V57RF-ADFV01136793.1-ighv:0.102539
,
(
(
V244RF-AQIA01066385.1-ighv:0.0256441
,
V98RF-AQIB01153489.1-ighv:0.0256441
):0.04757
,
(
V70RF-ABGA01174995.1-ighv:0.0518212
,
(
V51RF-ABGA01099940.1-ighv:0.0447404
,
(
V39RF-AJFE01045037.1-ighv:0.00498507
,
V149RF-AACZ03171037.1-ighv:0.00498507
):0.0397553
):0.00708084
):0.0213928
):0.0293245
):0.0873672
,
(
(
V101RF-AQIB01153491.1-ighv:0.0715773
,
(
V106RF-AQIB01153504.1-ighv:-0
,
V107RF-AQIB01153506.1-ighv:-0
):0.0715773
):0.0766915
,
(
(
V109RF-AGCE01147916.1-ighv:0.0664262
,
(
(
V128RF-AQIB01153541.1-ighv:0.0151675
,
V161RF-JYKQ01015026.1-ighv:0.0151675
):0.0323923
,
(
(
V50RF-AJFE01045051.1-ighv:-0
,
V101RF-AACZ03097906.1-ighv:-0
):0.0256441
,
V135RF-CABD02117467.1-ighv:0.0256441
):0.0219157
):0.0188665
):0.0708762
,
(
V90RF-AJFE01010857.1-ighv:0.149717
,
(
(
(
V108RF-ADFV01131946.1-ighv:0.0309971
,
V119RF-ADFV01131959.1-ighv:0.0309971
):0.0423984
,
(
V116RF-AQIB01153509.1-ighv:0.0607793
,
(
(
V258RF-AQIA01073275.1-ighv:0.0309971
,
V133RF-JYKQ01245882.1-ighv:0.0309971
):0.00760299
,
(
V58RF-AHZZ01108247.1-ighv:0.0339048
,
(
V213RF-AHZZ01096575.1-ighv:0.0259099
,
V172RF-JABR01092598.1-ighv:0.0259099
):0.00799495
):0.00469531
):0.0221792
):0.0126162
):0.064486
,
(
(
V230RF-ABGA01360478.1-ighv:0.0419423
,
(
V114RF-CABD02117385.1-ighv:0.00498507
,
V183RF-AACZ03098100.1-ighv:0.00498507
):0.0369573
):0.0591076
,
(
V68RF-ABGA01174994.1-ighv:0.119491
,
(
(
V83RF-JABR01004697.1-ighv:0.0270016
,
(
V22RF-AHZZ01091598.1-ighv:0.0126039
,
(
(
V248RF-AQIA01066387.1-ighv:-0
,
V95RF-AQIB01153484.1-ighv:-0
):0.00498507
,
V45RF-JYKQ01041718.1-ighv:0.00498507
):0.00761883
):0.0143977
):0.0861794
,
(
V57RF-AGCE01147749.1-ighv:0.0862414
,
(
(
(
V116RF-AJFE01045444.1-ighv:-0
,
V154RF-AACZ03171037.1-ighv:-0
):0.0561371
,
(
V77RF-JYKQ01067101.1-ighv:0.0337132
,
(
V97RF-JABR01055994.1-ighv:0.0337932
,
(
V177RF-AQIA01075848.1-ighv:0.0256441
,
V124RF-AQIB01153538.1-ighv:0.0256441
):0.00814914
):-8.00043e-05
):0.0224239
):0.0300191
,
(
V114RF-AGCE01148081.1-ighv:0.0659352
,
(
V69RF-AGCE01147945.1-ighv:0.0683095
,
(
V72RF-AGCE01148067.1-ighv:0.060588
,
(
(
V103RF-AQIB01153498.1-ighv:0.0177678
,
(
V157RF-AQIA01075814.1-ighv:0.00498507
,
V198RF-AHZZ01090492.1-ighv:0.00498507
):0.0127827
):0.021418
,
(
V125RF-JYKQ01245859.1-ighv:0.0256441
,
V199RF-JYKQ01062881.1-ighv:0.0256441
):0.0135417
):0.0214022
):0.0077215
):-0.0023743
):0.0202209
):8.52346e-05
):0.0269396
):0.00631004
):-0.0184411
):0.0368317
):0.0118354
):-0.0124147
):0.0109664
):0.0416369
):-0.0123864
,
(
(
V48RF-ABGA01099934.1-ighv:0.0768903
,
(
V94RF-AQIB01153484.1-ighv:0.0364292
,
V82RF-JABR01004697.1-ighv:0.0364292
):0.0404611
):0.0951178
,
(
(
V63RF-AGCE01147866.1-ighv:0.139222
,
(
(
V160RF-AJFE01119867.1-ighv:0.0203681
,
V111RF-AACZ03102011.1-ighv:0.0203681
):0.115859
,
(
(
V54RF-ABDC01391612.1-ighv:0.0423869
,
V125RF-ABDC01419594.1-ighv:0.0423869
):0.0575387
,
(
V229RF-ABGA01360476.1-ighv:0.130818
,
(
(
V127RF-AQIB01153541.1-ighv:0.0309971
,
V160RF-JYKQ01015024.1-ighv:0.0309971
):0.0746505
,
(
V181RF-AACZ03098097.1-ighv:0.109414
,
(
V10RF-AHZZ01064617.1-ighv:0.0871315
,
(
(
(
V49RF-AJFE01045051.1-ighv:-0
,
V100RF-AACZ03097906.1-ighv:-0
):0.0364292
,
(
V33RF-CABD02136332.1-ighv:-0
,
V134RF-CABD02117467.1-ighv:-0
):0.0364292
):0.0244147
,
(
(
V149RF-CABD02117766.1-ighv:0.0203681
,
V150RF-CABD02117767.1-ighv:0.0203681
):0.0215742
,
V101RF-ADFV01131933.1-ighv:0.0419423
):0.0189016
):0.0262875
):0.0222829
):-0.00376677
):0.0251705
):-0.0308925
):0.0363011
):0.00299479
):0.00431895
,
(
(
(
V16RF-JABR01066987.1-ighv:0.0638474
,
(
(
V201RF-AHZZ01090495.1-ighv:0.0151675
,
V169RF-JYKQ01042857.1-ighv:0.0151675
):0.045375
,
(
(
V125RF-AQIB01153538.1-ighv:0.0419839
,
(
V178RF-AQIA01075848.1-ighv:0.0309971
,
V100RF-AQIB01153491.1-ighv:0.0309971
):0.0109867
):0.0143298
,
(
(
V14RF-JABR01062345.1-ighv:0.0419839
,
(
V52RF-JABR01089346.1-ighv:0.0256441
,
V104RF-JABR01068488.1-ighv:0.0256441
):0.0163398
):0.00570531
,
(
V142RF-JABR01078980.1-ighv:0.0364292
,
V143RF-JABR01086102.1-ighv:0.0364292
):0.0112599
):0.00862452
):0.00422876
):0.003305
):0.0150076
,
(
V124RF-ADFV01131961.1-ighv:0.0665171
,
(
V11RF-ABGA01025808.1-ighv:0.0533945
,
(
(
V6RF-AJFE01011111.1-ighv:-0
,
V91RF-AACZ03097900.1-ighv:-0
):0.0309971
,
V117RF-CABD02117395.1-ighv:0.0309971
):0.0223973
):0.0131227
):0.0123379
):0.057302
,
(
V126RF-AQIB01153538.1-ighv:0.0901312
,
(
V64RF-AHZZ01111405.1-ighv:0.0510422
,
(
(
V15RF-ABGA01044302.1-ighv:-0
,
V103RF-ABGA01313763.1-ighv:-0
):0.0317299
,
(
V142RF-CABD02117482.1-ighv:0.021461
,
V118RF-ADFV01131958.1-ighv:0.021461
):0.0102689
):0.0193122
):0.039089
):0.0460258
):0.00738348
):0.0284676
):0.00551121
):1.16584
):0.547055
):0.320018
):0.0200231
):0.124714
):3.80839
,
(
(
(
(
(
(
(
V81RF-ABDC01446518.1-igkv:0.0360539
,
V85RF-ABDC01472745.1-igkv:0.0360539
):0.0439808
,
(
V57RF-ABDC01394567.1-igkv:0.0700431
,
(
(
V6RF-JZKE01218259.1-igkv:0.0253837
,
V31RF-JZKE01296733.1-igkv:0.0253837
):0.0302133
,
(
V30RF-ABDC01351837.1-igkv:0.0465544
,
V137RF-ABDC01562688.1-igkv:0.0465544
):0.00904256
):0.0144462
):0.00999151
):0.03919
,
(
(
V58RF-ABDC01396012.1-igkv:0.0521098
,
V96RF-ABDC01523330.1-igkv:0.0521098
):0.043733
,
(
V34RF-AGCE01134600.1-igkv:0.0884209
,
(
V146RF-ADFV01132961.1-igkv:0.0929365
,
(
V23RF-AQIB01144258.1-igkv:0.0804093
,
(
V44RF-AGCE01134604.1-igkv:0.104436
,
(
(
V175RF-JYKQ01052437.1-igkv:0.0430589
,
(
V90RF-AHZZ01042078.1-igkv:0.0300206
,
(
V158RF-JYKQ01005048.1-igkv:0.0234864
,
(
V201RF-AQIA01017118.1-igkv:0.0207916
,
V232RF-AQIB01159121.1-igkv:0.0207916
):0.00269481
):0.00653418
):0.0130383
):0.0140075
,
(
(
V142RF-ADFV01132961.1-igkv:0.0405328
,
(
V24RF-AQIB01144263.1-igkv:0.0344483
,
(
(
V200RF-AQIA01017118.1-igkv:0.0207916
,
V25RF-AQIB01144263.1-igkv:0.0207916
):0.00538962
,
V176RF-JYKQ01052439.1-igkv:0.0261813
):0.008267
):0.00608454
):0.0250453
,
(
(
V16RF-AJFE01012235.1-igkv:-0
,
V137RF-AACZ03151853.1-igkv:-0
):0.0725937
,
(
(
V205RF-AQIA01017118.1-igkv:0.0234864
,
(
(
(
V28RF-AQIB01144263.1-igkv:-0
,
V29RF-AQIB01144264.1-igkv:-0
):0
,
V24RF-JABR01076260.1-igkv:-0
):0.00508649
,
V40RF-AHZZ01104241.1-igkv:0.00508649
):0.0183999
):0.0348501
,
(
(
V13RF-AJFE01012234.1-igkv:0.00488761
,
V133RF-AACZ03151853.1-igkv:0.00488761
):0.037526
,
(
V160RF-CABD02196547.1-igkv:0.0316926
,
(
V157RF-ABGA01199503.1-igkv:0.0207916
,
V102RF-JABR01064858.1-igkv:0.0207916
):0.010901
):0.010721
):0.0159229
):0.0142572
):-0.00701556
):-0.00851177
):0.0473701
):-0.0240272
):0.0125272
):-0.0045156
):0.00742183
):0.0233819
):0.643462
,
(
(
(
V7RF-AQIB01144237.1-igkv:0.0535404
,
(
(
V197RF-AQIA01017094.1-igkv:0.0303695
,
V6RF-AHZZ01042100.1-igkv:0.0303695
):0
,
(
V109RF-AHZZ01042093.1-igkv:0.0199615
,
V54RF-JYKQ01052451.1-igkv:0.0199615
):0.010408
):0.023171
):0.0610803
,
(
(
(
V35RF-AGCE01134600.1-igkv:0.0745677
,
(
(
V75RF-ABGA01197604.1-igkv:0.0122338
,
(
V78RF-AJFE01000028.1-igkv:0.00484029
,
V114RF-AACZ03126842.1-igkv:0.00484029
):0.00739353
):0.0624785
,
(
(
V39RF-CABD02196568.1-igkv:0.022545
,
(
V14RF-AJFE01012234.1-igkv:0.00488761
,
V134RF-AACZ03151853.1-igkv:0.00488761
):0.0176574
):0.055142
,
(
V117RF-AHZZ01042094.1-igkv:0.0592362
,
(
V81RF-AJFE01003455.1-igkv:0.0481514
,
(
(
V106RF-AHZZ01042093.1-igkv:0.00488761
,
V188RF-JYKQ01052444.1-igkv:0.00488761
):0.0312478
,
(
V44RF-JABR01088351.1-igkv:0.0387386
,
(
V163RF-CABD02196559.1-igkv:0.0387187
,
(
(
V43RF-AQIA01017097.1-igkv:0.0274717
,
(
V6RF-AQIB01144236.1-igkv:0.00974675
,
V108RF-AHZZ01042093.1-igkv:0.00974675
):0.017725
):-0.00259333
,
V55RF-JYKQ01052451.1-igkv:0.0248784
):0.0138403
):1.9934e-05
):-0.00260324
):0.012016
):0.0110848
):0.0184508
):-0.00297467
):-0.000144616
):0.00852235
,
(
(
(
V95RF-AHZZ01042080.1-igkv:0.0174141
,
(
V56RF-AQIA01017115.1-igkv:0.0148668
,
V179RF-JYKQ01052440.1-igkv:0.0148668
):0.00254736
):0.0585816
,
(
V26RF-AQIB01144263.1-igkv:0.0720184
,
(
V23RF-JABR01076259.1-igkv:0.0610954
,
(
V144RF-ADFV01132961.1-igkv:0.0459505
,
(
V47RF-JABR01088351.1-igkv:0.0411601
,
(
V203RF-AQIA01017118.1-igkv:0.035725
,
(
(
V15RF-AJFE01012234.1-igkv:-0
,
V135RF-AACZ03151853.1-igkv:-0
):0.0199615
,
V126RF-ABGA01394059.1-igkv:0.0199615
):0.0157635
):0.00543508
):0.00479037
):0.0151449
):0.010923
):0.00397732
):-0.00760447
,
(
(
V41RF-AGCE01134603.1-igkv:0.0632172
,
(
V5RF-JZKE01218259.1-igkv:0.0404259
,
(
V36RF-ABDC01360510.1-igkv:0.0277679
,
(
V37RF-ABDC01360666.1-igkv:0.0278238
,
(
V27RF-ABDC01351832.1-igkv:0.0199615
,
V104RF-ABDC01583217.1-igkv:0.0199615
):0.00786235
):-5.59334e-05
):0.012658
):0.0227913
):0.000536747
,
(
V10RF-AQIB01144237.1-igkv:0.0356862
,
V113RF-AHZZ01042093.1-igkv:0.0356862
):0.0280678
):0.00463731
):0.0146988
):0.0127862
,
(
(
V39RF-AGCE01134602.1-igkv:0.0914966
,
(
V105RF-AHZZ01042093.1-igkv:0.0675496
,
(
(
V202RF-AQIA01017118.1-igkv:0.0174141
,
(
V91RF-AHZZ01042078.1-igkv:0.00488761
,
V157RF-JYKQ01005045.1-igkv:0.00488761
):0.0125265
):0.0471478
,
(
(
V15RF-AQIB01144243.1-igkv:0.022545
,
(
(
V122RF-AQIA01058132.1-igkv:0.00488761
,
V185RF-JYKQ01052442.1-igkv:0.00488761
):0.00997918
,
V100RF-AHZZ01042085.1-igkv:0.0148668
):0.00767821
):0.0256969
,
(
V11RF-AQIB01144240.1-igkv:0.0512248
,
(
(
V115RF-AHZZ01042093.1-igkv:0.036573
,
(
V193RF-JYKQ01052444.1-igkv:0.0317559
,
(
V99RF-AHZZ01042085.1-igkv:0.022545
,
(
V51RF-AQIA01017100.1-igkv:0.0199615
,
V14RF-AQIB01144242.1-igkv:0.0199615
):0.00258349
):0.00921093
):0.00481711
):0.00526769
,
(
V12RF-AQIB01144242.1-igkv:0.0397712
,
(
V102RF-AHZZ01042091.1-igkv:0.027749
,
(
V49RF-AQIA01017099.1-igkv:0.0199615
,
V146RF-AQIB01158310.1-igkv:0.0199615
):0.00778747
):0.0120223
):0.00206948
):0.00938404
):-0.00298282
):0.01632
):0.00298761
):0.023947
):0.0139442
,
(
V38RF-ABDC01360670.1-igkv:0.126806
,
(
V40RF-CABD02196577.1-igkv:0.116383
,
(
(
V103RF-JABR01067077.1-igkv:0.0442949
,
(
V98RF-JABR01061517.1-igkv:0.0174141
,
(
V92RF-AHZZ01042079.1-igkv:0.0148668
,
V182RF-JYKQ01052440.1-igkv:0.0148668
):0.00254736
):0.0268808
):0.0627653
,
(
V159RF-CABD02196545.1-igkv:0.107775
,
(
V7RF-AHZZ01042101.1-igkv:0.0782808
,
(
(
(
V38RF-AQIA01017094.1-igkv:0.0199615
,
V195RF-JYKQ01052451.1-igkv:0.0199615
):0.0157247
,
(
V48RF-AQIA01017097.1-igkv:0.0303695
,
V191RF-JYKQ01052444.1-igkv:0.0303695
):0.00531674
):0.0394929
,
(
V70RF-JABR01094257.1-igkv:0.0825185
,
(
V116RF-ABDC01358932.1-igkv:0.0788128
,
(
V189RF-ABGA01257764.1-igkv:0.0833725
,
(
V40RF-AGCE01134603.1-igkv:0.0711654
,
(
V7RF-JZKE01218269.1-igkv:0.0491434
,
(
V55RF-AQIA01017115.1-igkv:0.0573625
,
(
V127RF-ABGA01394062.1-igkv:0.0623185
,
(
V140RF-ADFV01132961.1-igkv:0.0670983
,
(
V99RF-ADFV01106214.1-igkv:0.0571484
,
(
V28RF-ABDC01351835.1-igkv:0.0397319
,
(
V43RF-AGCE01134604.1-igkv:0.0304073
,
(
V36RF-AGCE01134600.1-igkv:0.0251285
,
V188RF-ABGA01257764.1-igkv:0.0251285
):0.00527885
):0.00932461
):0.0174165
):0.00994987
):-0.00477977
):-0.00495599
):-0.0082191
):0.022022
):0.012207
):-0.00455967
):0.00370573
):-0.00733938
):0.00310167
):0.0294942
):-0.000714734
):0.00932273
):0.0104229
):-0.0213651
):-0.00956455
):0.0187445
):0.36972
,
(
(
(
V33RF-AQIB01144264.1-igkv:0.0710212
,
(
V52RF-AGCE01134616.1-igkv:0.0428411
,
V34RF-ABDC01360510.1-igkv:0.0428411
):0.0281801
):0.0228977
,
(
(
V110RF-AHZZ01042093.1-igkv:0.027749
,
(
V45RF-AQIA01017097.1-igkv:0.0199615
,
V8RF-AQIB01144237.1-igkv:0.0199615
):0.00778747
):0.0716251
,
(
V19RF-AJFE01012238.1-igkv:0.0877243
,
(
V143RF-ADFV01132961.1-igkv:0.0734403
,
(
V59RF-AQIA01017115.1-igkv:0.0782352
,
(
V138RF-ADFV01132961.1-igkv:0.0728915
,
(
V187RF-JYKQ01052443.1-igkv:0.0589651
,
(
V88RF-AHZZ01042077.1-igkv:0.0505186
,
(
V31RF-AGCE01134597.1-igkv:0.0490825
,
(
(
V18RF-AQIB01144244.1-igkv:0.00984269
,
V178RF-JYKQ01052440.1-igkv:0.00984269
):0.0172879
,
(
V180RF-JYKQ01052440.1-igkv:0.0136108
,
(
V19RF-AQIB01144247.1-igkv:0.0123547
,
(
V57RF-AQIA01017115.1-igkv:0.00488761
,
V94RF-AHZZ01042080.1-igkv:0.00488761
):0.00746713
):0.00125602
):0.0135199
):0.0219518
):0.0014361
):0.00844651
):0.0139265
):0.00534368
):-0.00479488
):0.014284
):0.0116498
):-0.00545519
):0.0265906
,
(
V46RF-JABR01088351.1-igkv:0.12938
,
(
V46RF-AGCE01134609.1-igkv:0.109605
,
(
V135RF-ADFV01132961.1-igkv:0.0977786
,
(
V97RF-AHZZ01042083.1-igkv:0.0722464
,
(
V128RF-AACZ03151853.1-igkv:0.0601212
,
(
V9RF-AJFE01012232.1-igkv:0.0605832
,
(
V133RF-ADFV01132961.1-igkv:0.054412
,
(
V41RF-AQIA01017097.1-igkv:0.0466161
,
(
(
V191RF-ABGA01257777.1-igkv:0.0199615
,
V225RF-ABGA01322683.1-igkv:0.0199615
):0.0225074
,
(
V198RF-AQIA01017094.1-igkv:0.0248784
,
V8RF-AHZZ01042101.1-igkv:0.0248784
):0.0175905
):0.00414717
):0.0077959
):0.00617123
):-0.000461992
):0.0121252
):0.0255322
):0.0118269
):0.0197744
):-0.00887035
):0.36972
):0.273742
):0.850552
,
(
(
(
V61RF-AQIA01017139.1-igkv:0.0575071
,
(
V65RF-ABGA01154383.1-igkv:0.0107994
,
(
V36RF-CABD02196508.1-igkv:-0
,
V1RF-AACZ03015560.1-igkv:-0
):0.0107994
):0.0467077
):0.327814
,
(
V105RF-AGCE01134619.1-igkv:0.346811
,
(
V150RF-ABGA01154384.1-igkv:0.0484457
,
(
V87RF-JABR01032523.1-igkv:0.0499345
,
(
V25RF-AJFE01016082.1-igkv:0.0360539
,
V153RF-CABD02196508.1-igkv:0.0360539
):0.0138806
):-0.00148877
):0.298365
):0.0385108
):1.37618
,
(
(
(
V56RF-AQIB01144282.1-igkv:0.0203071
,
(
V233RF-AQIA01017139.1-igkv:0.0134156
,
(
V5RF-AHZZ01040804.1-igkv:0.00530225
,
V124RF-JYKQ01187337.1-igkv:0.00530225
):0.00811331
):0.00689158
):0.256457
,
(
(
(
V215RF-AQIA01017122.1-igkv:0.0334144
,
V40RF-AQIB01144269.1-igkv:0.0334144
):0.0803797
,
(
(
V219RF-AQIA01017123.1-igkv:0.0404544
,
(
V234RF-AHZZ01106331.1-igkv:0.00513877
,
V141RF-JYKQ01005004.1-igkv:0.00513877
):0.0353156
):0.0537848
,
(
V79RF-JYKQ01079834.1-igkv:0.0751842
,
(
(
V36RF-JABR01076263.1-igkv:0.0376681
,
(
(
V225RF-AQIA01017128.1-igkv:0.0103522
,
V61RF-AHZZ01109398.1-igkv:0.0103522
):0.00528981
,
V49RF-AQIB01144274.1-igkv:0.015642
):0.0220261
):0.0246668
,
(
V53RF-JYKQ01051985.1-igkv:0.0590484
,
(
V221RF-AHZZ01104243.1-igkv:0.0558532
,
(
(
V51RF-AQIB01144276.1-igkv:0.0165024
,
(
(
V73RF-AHZZ01143621.1-igkv:-0
,
V244RF-AHZZ01111138.1-igkv:-0
):0
,
V247RF-AHZZ01111367.1-igkv:-0
):0.0165024
):0.0273628
,
(
V231RF-AQIA01017135.1-igkv:0.0455183
,
(
V239RF-AHZZ01107395.1-igkv:0.0425065
,
(
V75RF-AHZZ01169213.1-igkv:0.0548882
,
(
(
V147RF-JYKQ01005018.1-igkv:-0
,
V149RF-JYKQ01005019.1-igkv:-0
):0.0516095
,
(
V260RF-AQIA01075132.1-igkv:0.0469941
,
(
V227RF-AQIA01017128.1-igkv:0.0296561
,
(
V213RF-AQIA01017120.1-igkv:0.0212536
,
(
(
V38RF-AQIB01144265.1-igkv:-0
,
V67RF-AHZZ01117754.1-igkv:-0
):0.0210502
,
(
V142RF-JYKQ01005007.1-igkv:0.0103522
,
V38RF-JABR01076263.1-igkv:0.0103522
):0.010698
):0.000203455
):0.00840252
):0.0173379
):0.00461539
):0.00327874
):-0.0123817
):0.00301183
):-0.0016531
):0.0119879
):0.00319524
):0.00328641
):0.0128493
):0.019055
):0.0195549
):0.00324407
,
(
(
V95RF-JABR01041956.1-igkv:0.0542992
,
(
V249RF-JYKQ01187338.1-igkv:0.019668
,
(
V82RF-AHZZ01040804.1-igkv:0.00774547
,
(
V60RF-AQIA01017139.1-igkv:0.00513877
,
V224RF-AQIB01144282.1-igkv:0.00513877
):0.0026067
):0.0119226
):0.0346312
):0.0741264
,
(
(
V54RF-AQIB01144282.1-igkv:0.0363536
,
(
V254RF-AHZZ01185532.1-igkv:0.00535908
,
V123RF-JYKQ01187326.1-igkv:0.00535908
):0.0309945
):0.070174
,
(
(
V38RF-ADFV01106193.1-igkv:0.0675488
,
(
V129RF-ABGA01394066.1-igkv:0.046708
,
(
V18RF-AJFE01012236.1-igkv:0.0104605
,
V139RF-AACZ03151855.1-igkv:0.0104605
):0.0362476
):0.0208408
):0.0204448
,
(
(
V222RF-AQIA01017126.1-igkv:0.0191273
,
(
V256RF-AHZZ01189922.1-igkv:0.00535908
,
V210RF-JYKQ01076937.1-igkv:0.00535908
):0.0137682
):0.0668708
,
(
(
V51RF-AGCE01134616.1-igkv:0.0319889
,
V54RF-AGCE01134617.1-igkv:0.0319889
):0.0511193
,
(
(
(
V207RF-AQIA01017118.1-igkv:0.0103522
,
V153RF-JYKQ01005032.1-igkv:0.0103522
):0.0248226
,
(
V26RF-JABR01076261.1-igkv:0.0356409
,
(
V31RF-AQIB01144264.1-igkv:0.0219317
,
V42RF-AHZZ01104241.1-igkv:0.0219317
):0.0137092
):-0.000466123
):0.0606525
,
(
(
V83RF-ABGA01285645.1-igkv:0.0165024
,
V107RF-ABGA01321410.1-igkv:0.0165024
):0.0774492
,
(
V34RF-ADFV01106193.1-igkv:0.0784424
,
(
V173RF-AACZ03015562.1-igkv:0.0705637
,
(
V113RF-ABGA01356726.1-igkv:0.0455687
,
(
(
V133RF-ABGA01394075.1-igkv:0.0264584
,
V44RF-CABD02196588.1-igkv:0.0264584
):0.0185118
,
(
(
V24RF-AJFE01012249.1-igkv:0.0103522
,
V145RF-AACZ03151858.1-igkv:0.0103522
):0.0367007
,
(
(
V22RF-AJFE01012238.1-igkv:-0
,
V142RF-AACZ03151855.1-igkv:-0
):0.045441
,
(
V87RF-ABGA01290070.1-igkv:0.0386486
,
(
V86RF-ABGA01285651.1-igkv:0.0306123
,
(
V217RF-ABGA01315458.1-igkv:0.0210101
,
V40RF-JABR01076265.1-igkv:0.0210101
):0.00960222
):0.00803627
):0.00679248
):0.00161187
):-0.00208277
):0.000598568
):0.024995
):0.00787871
):0.0155093
):0.00187559
):-0.0127191
):0.00288994
):0.00199546
):0.018534
):0.021898
):-0.0113874
):0.159726
):0.940178
,
(
(
V106RF-AGCE01134619.1-igkv:0.350455
,
(
(
(
V171RF-AACZ03015561.1-igkv:0.0361138
,
(
V232RF-AQIA01017139.1-igkv:0.0280319
,
(
V55RF-AQIB01144282.1-igkv:0.0201628
,
V4RF-AHZZ01040804.1-igkv:0.0201628
):0.00786912
):0.00808196
):0.212939
,
(
(
(
V209RF-AQIA01017120.1-igkv:-0
,
V45RF-AHZZ01104243.1-igkv:-0
):0.00530225
,
V34RF-AQIB01144265.1-igkv:0.00530225
):0.121365
,
(
(
V25RF-JABR01076260.1-igkv:0.0178517
,
(
V41RF-AHZZ01104241.1-igkv:0.0144702
,
(
V155RF-JYKQ01005033.1-igkv:0.00782629
,
(
V206RF-AQIA01017118.1-igkv:0.00519213
,
V30RF-AQIB01144264.1-igkv:0.00519213
):0.00263416
):0.00664393
):0.00338146
):0.0179357
,
(
V33RF-ADFV01106193.1-igkv:0.0323768
,
(
(
V17RF-AJFE01012235.1-igkv:-0
,
V138RF-AACZ03151853.1-igkv:-0
):0.0104605
,
V158RF-CABD02196542.1-igkv:0.0104605
):0.0219164
):0.0034105
):0.0908798
):0.122385
):0.0390292
,
(
(
V104RF-AGCE01134619.1-igkv:0.08773
,
(
V32RF-JZKE01097728.1-igkv:0.0701824
,
(
(
(
V64RF-AQIA01017150.1-igkv:0.00974675
,
V5RF-JABR01020048.1-igkv:0.00974675
):0.0113226
,
(
V86RF-AHZZ01040808.1-igkv:0.0147555
,
(
V226RF-AQIB01144284.1-igkv:0.00974675
,
V250RF-JYKQ01187347.1-igkv:0.00974675
):0.00500874
):0.00631384
):0.0264508
,
(
V0RF-AACZ03015560.1-igkv:0.0340297
,
(
V64RF-ABGA01154382.1-igkv:0.0248784
,
(
V35RF-CABD02196505.1-igkv:0.0197642
,
V98RF-ADFV01106195.1-igkv:0.0197642
):0.00511417
):0.00915131
):0.0134904
):0.0226623
):0.0175475
):0.166011
,
(
V68RF-AHZZ01117754.1-igkv:0.105883
,
(
V46RF-AQIB01144273.1-igkv:0.0891876
,
(
V43RF-AQIB01144273.1-igkv:0.0549762
,
V31RF-JABR01076261.1-igkv:0.0549762
):0.0342114
):0.0166949
):0.147858
):0.0343406
):0.0623738
):0.888537
,
(
(
V130RF-ABGA01394066.1-igkv:0.260445
,
(
(
(
V29RF-ABDC01351837.1-igkv:0.0239873
,
(
V26RF-ABDC01351831.1-igkv:0.00519213
,
V134RF-ABDC01537099.1-igkv:0.00519213
):0.0187951
):0.0910281
,
(
V35RF-ABDC01360510.1-igkv:0.0868327
,
(
V56RF-ABDC01394567.1-igkv:0.0740255
,
V106RF-ABDC01599688.1-igkv:0.0740255
):0.0128071
):0.0281827
):0.103397
,
(
(
V35RF-ADFV01106193.1-igkv:0.0573685
,
(
V27RF-JABR01076261.1-igkv:0.0362643
,
(
V32RF-AQIB01144264.1-igkv:0.018326
,
(
V208RF-AQIA01017118.1-igkv:0.00513877
,
V43RF-AHZZ01104241.1-igkv:0.00513877
):0.0131872
):0.0179383
):0.0211041
):0.105255
,
(
(
(
V39RF-JABR01076264.1-igkv:0.0801036
,
(
V42RF-AGCE01134604.1-igkv:0.0617574
,
(
V27RF-AQIB01144263.1-igkv:0.0223922
,
(
V204RF-AQIA01017118.1-igkv:0.0129971
,
(
V87RF-AHZZ01042076.1-igkv:0.00513877
,
V156RF-JYKQ01005040.1-igkv:0.00513877
):0.0078583
):0.00939513
):0.0393652
):0.0183461
):0.0205654
,
(
V136RF-ADFV01132961.1-igkv:0.104818
,
(
V28RF-JABR01076261.1-igkv:0.0869145
,
(
(
V17RF-AQIB01144243.1-igkv:0.0210101
,
V93RF-AHZZ01042080.1-igkv:0.0210101
):0.0370009
,
(
V50RF-AQIA01017099.1-igkv:0.0433051
,
V116RF-AHZZ01042093.1-igkv:0.0433051
):0.0147059
):0.0289035
):0.0179037
):-0.00414918
):0.0416955
,
(
(
V132RF-ADFV01132961.1-igkv:0.111538
,
(
(
V9RF-AQIB01144237.1-igkv:0.0376254
,
(
(
V47RF-AQIA01017097.1-igkv:0.0210101
,
V190RF-JYKQ01052444.1-igkv:0.0210101
):0.00544831
,
V112RF-AHZZ01042093.1-igkv:0.0264584
):0.011167
):0.0441113
,
(
V176RF-AACZ03015754.1-igkv:0.0606549
,
(
V39RF-AQIA01017096.1-igkv:0.0257876
,
(
V3RF-AQIB01144236.1-igkv:0.0196881
,
(
V45RF-JABR01088351.1-igkv:0.0129971
,
(
V104RF-AHZZ01042093.1-igkv:0.00513877
,
V194RF-JYKQ01052450.1-igkv:0.00513877
):0.0078583
):0.00669103
):0.00609951
):0.0348673
):0.0210818
):0.0298015
):0.0375127
,
(
(
(
V62RF-AQIA01017140.1-igkv:0.0103522
,
V85RF-AHZZ01040807.1-igkv:0.0103522
):0.0161062
,
V223RF-AQIB01144282.1-igkv:0.0264584
):0.150749
,
(
V32RF-AGCE01134598.1-igkv:0.186623
,
(
V139RF-ADFV01132961.1-igkv:0.149057
,
(
V178RF-AACZ03016143.1-igkv:0.167774
,
(
(
(
V89RF-AHZZ01042078.1-igkv:0.0264584
,
V183RF-JYKQ01052440.1-igkv:0.0264584
):0.0500741
,
(
V12RF-AJFE01012232.1-igkv:0.0609509
,
V99RF-JABR01061517.1-igkv:0.0609509
):0.0155816
):0.0561322
,
(
(
V3RF-ABDC01165520.1-igkv:-0
,
V95RF-ABDC01522041.1-igkv:-0
):0.15463
,
(
V165RF-CABD02196902.1-igkv:0.1546
,
(
V111RF-ABGA01356722.1-igkv:0.140802
,
(
V76RF-ABGA01198108.1-igkv:0.128119
,
(
V47RF-AGCE01134610.1-igkv:0.10278
,
(
V37RF-AGCE01134600.1-igkv:0.105175
,
(
V224RF-AQIA01017128.1-igkv:0.103426
,
(
V38RF-AGCE01134600.1-igkv:0.106535
,
(
(
V80RF-AJFE01002352.1-igkv:-0
,
V45RF-CABD02196595.1-igkv:-0
):0.0939186
,
(
(
V151RF-ABGA01154386.1-igkv:0.0640836
,
(
V154RF-CABD02196513.1-igkv:0.0319889
,
V170RF-AACZ03015561.1-igkv:0.0319889
):0.0320947
):0.0300757
,
(
V52RF-JYKQ01051984.1-igkv:0.102368
,
(
V155RF-CABD02196515.1-igkv:0.090143
,
(
V154RF-ABGA01180641.1-igkv:0.10507
,
(
(
(
V189RF-AACZ03151873.1-igkv:0.00513877
,
V207RF-AACZ03183442.1-igkv:0.00513877
):0.0279661
,
(
V190RF-AACZ03151911.1-igkv:0.0219578
,
(
V172RF-CABD02379503.1-igkv:0.0229055
,
(
V200RF-AACZ03178854.1-igkv:0.0179954
,
(
V177RF-AACZ03016034.1-igkv:0.0176648
,
(
V0RF-CABD02043817.1-igkv:0.0143195
,
(
V206RF-AACZ03179806.1-igkv:0.00774547
,
(
V115RF-AACZ03126842.1-igkv:0.00513877
,
V201RF-AACZ03179013.1-igkv:0.00513877
):0.0026067
):0.00657405
):0.00334527
):0.000330612
):0.00491007
):-0.000947706
):0.0111471
):0.0530123
,
(
V132RF-ABGA01394071.1-igkv:0.0730394
,
(
(
V13RF-AQIB01144242.1-igkv:0.0210101
,
V186RF-JYKQ01052443.1-igkv:0.0210101
):0.0588164
,
(
V21RF-AJFE01012238.1-igkv:0.0654469
,
(
(
V44RF-AQIB01144273.1-igkv:0.0376037
,
V208RF-JYKQ01076937.1-igkv:0.0376037
):0.0257666
,
(
V192RF-JYKQ01052444.1-igkv:0.0598042
,
(
V96RF-AHZZ01042083.1-igkv:0.0589289
,
(
V48RF-JABR01088351.1-igkv:0.0358544
,
(
V184RF-JYKQ01052441.1-igkv:0.034105
,
(
V50RF-JABR01088351.1-igkv:0.0223922
,
(
(
V52RF-AQIA01017105.1-igkv:-0
,
V123RF-AQIA01058133.1-igkv:-0
):0.018326
,
(
V16RF-AQIB01144243.1-igkv:0.00513877
,
V101RF-AHZZ01042085.1-igkv:0.00513877
):0.0131872
):0.00406618
):0.0117128
):0.00174937
):0.0230745
):0.000875335
):0.00356613
):0.00207661
):0.0143795
):-0.00678706
):0.0130778
):0.0189525
):-0.0149267
):0.0122252
):-0.00820881
):-0.000240773
):0.0126169
):-0.00310964
):0.00174936
):-0.00239503
):0.0253393
):0.0126829
):0.0137979
):3.00109e-05
):-0.0219656
):0.0351095
):-0.0187168
):0.0375654
):-0.00941551
):-0.0281564
):-0.00668636
):0.0202588
):0.0557888
):0.0420326
):0.466627
,
(
(
(
(
V35RF-AQIB01144265.1-igkv:0.0344988
,
(
V152RF-JYKQ01005027.1-igkv:0.0189205
,
(
V210RF-AQIA01017120.1-igkv:0.0161471
,
V46RF-AHZZ01104243.1-igkv:0.0161471
):0.00277333
):0.0155783
):0.0440975
,
(
(
V106RF-ABGA01321409.1-igkv:0.0645647
,
(
(
(
(
V211RF-AQIA01017120.1-igkv:-0
,
V47RF-AHZZ01104243.1-igkv:-0
):0
,
V151RF-JYKQ01005026.1-igkv:-0
):0.00530225
,
V36RF-AQIB01144265.1-igkv:0.00530225
):0.0373303
,
(
(
V144RF-JYKQ01005013.1-igkv:0.00774547
,
(
V217RF-AQIA01017123.1-igkv:0.00513877
,
V232RF-AHZZ01106331.1-igkv:0.00513877
):0.0026067
):0.0407175
,
(
V39RF-ADFV01106195.1-igkv:0.0340945
,
(
V114RF-ABGA01356729.1-igkv:0.0380244
,
(
V59RF-AHZZ01109397.1-igkv:0.0292391
,
(
V226RF-AQIA01017128.1-igkv:0.0223721
,
(
(
V216RF-AQIA01017123.1-igkv:0.0103522
,
V220RF-AQIA01017125.1-igkv:0.0103522
):0.0106978
,
(
V145RF-JYKQ01005014.1-igkv:0.0156811
,
(
V41RF-AQIB01144269.1-igkv:0.0103522
,
V231RF-AHZZ01106331.1-igkv:0.0103522
):0.00532895
):0.00536882
):0.00132221
):0.00686691
):0.00878534
):-0.00392992
):0.0143685
):-0.00583044
):0.0219322
):0.0121735
,
(
(
V161RF-CABD02196553.1-igkv:0.0292236
,
(
V11RF-AJFE01012232.1-igkv:0.015642
,
V131RF-AACZ03151853.1-igkv:0.015642
):0.0135817
):0.0348968
,
(
(
V109RF-ABGA01342015.1-igkv:0.015642
,
V136RF-AACZ03151853.1-igkv:0.015642
):0.0440836
,
(
(
V98RF-AHZZ01042084.1-igkv:0.0158068
,
V177RF-JYKQ01052440.1-igkv:0.0158068
):0.0456667
,
(
(
(
V52RF-AQIB01144276.1-igkv:0.0237342
,
(
V245RF-AHZZ01111138.1-igkv:0.015642
,
V248RF-AHZZ01111367.1-igkv:0.015642
):0.00809225
):0.00413788
,
(
V53RF-AQIB01144276.1-igkv:0.0210101
,
V41RF-JABR01076266.1-igkv:0.0210101
):0.00686203
):0.0149044
,
(
(
V255RF-AHZZ01189918.1-igkv:0.0103522
,
V207RF-JYKQ01076935.1-igkv:0.0103522
):0.0331304
,
(
V37RF-JABR01076263.1-igkv:0.0210101
,
V42RF-JABR01076266.1-igkv:0.0210101
):0.0224725
):-0.000706036
):0.018697
):-0.00174788
):0.0043948
):0.0126178
):0.00185804
):0.0119
,
(
(
V181RF-JYKQ01052440.1-igkv:0.0433051
,
V141RF-ADFV01132961.1-igkv:0.0433051
):0.0343857
,
(
(
(
V214RF-AQIA01017120.1-igkv:0.0210101
,
V39RF-AQIB01144265.1-igkv:0.0210101
):0.0456084
,
(
V51RF-JABR01088351.1-igkv:0.0675047
,
(
(
V162RF-CABD02196556.1-igkv:0.0187181
,
(
V10RF-AJFE01012232.1-igkv:0.010571
,
V130RF-AACZ03151853.1-igkv:0.010571
):0.00814705
):0.0441494
,
(
V37RF-ADFV01106193.1-igkv:0.0500316
,
(
V37RF-AQIB01144265.1-igkv:0.0422127
,
(
V33RF-JABR01076263.1-igkv:0.0392611
,
(
V30RF-JABR01076261.1-igkv:0.0377616
,
(
V218RF-AQIA01017123.1-igkv:0.0384465
,
(
(
V150RF-JYKQ01005022.1-igkv:0.0185515
,
(
V212RF-AQIA01017120.1-igkv:0.010571
,
V143RF-JYKQ01005012.1-igkv:0.010571
):0.00798045
):0.00950011
,
(
V66RF-AHZZ01117753.1-igkv:0.0210101
,
V148RF-JYKQ01005018.1-igkv:0.0210101
):0.00704153
):0.0103949
):-0.000684951
):0.00149954
):0.00295159
):0.0078189
):0.0128358
):0.0046373
):-0.000886306
):0.00765798
,
(
V42RF-AQIB01144273.1-igkv:0.0638567
,
(
(
(
V23RF-AJFE01012245.1-igkv:-0
,
V143RF-AACZ03151857.1-igkv:-0
):0.0264584
,
V42RF-CABD02196586.1-igkv:0.0264584
):0.0161165
,
(
V112RF-ABGA01356724.1-igkv:0.0390417
,
(
(
V119RF-AJFE01047586.1-igkv:-0
,
V172RF-AACZ03015562.1-igkv:-0
):0.0264584
,
V131RF-ABGA01394068.1-igkv:0.0264584
):0.0125833
):0.00353321
):0.0212818
):0.0104198
):0.0034143
):0.0128056
):0.275407
,
(
(
V54RF-AQIA01017115.1-igkv:0.0844016
,
(
V49RF-JABR01088351.1-igkv:0.0778149
,
(
V37RF-CABD02196554.1-igkv:0.0714894
,
(
V53RF-AQIA01017109.1-igkv:0.0676104
,
(
V196RF-AQIA01007908.1-igkv:0.0606127
,
(
V114RF-AHZZ01042093.1-igkv:0.0419019
,
(
V55RF-AACZ03070936.1-igkv:0.00774547
,
(
V164RF-CABD02196901.1-igkv:0.00513877
,
V171RF-CABD02379427.1-igkv:0.00513877
):0.0026067
):0.0341564
):0.0187108
):0.00699772
):0.00387894
):0.00632557
):0.00658669
):0.0323752
,
(
V4RF-JZKE01218258.1-igkv:0.106051
,
(
(
(
V199RF-AQIA01017118.1-igkv:0.015642
,
V22RF-AQIB01144257.1-igkv:0.015642
):0.0423333
,
(
V152RF-ABGA01161530.1-igkv:0.04629
,
(
V58RF-AQIA01017115.1-igkv:0.0319889
,
V20RF-AQIB01144251.1-igkv:0.0319889
):0.0143011
):0.0116853
):0.0324295
,
(
(
(
V48RF-AGCE01134612.1-igkv:0.0103522
,
V49RF-AGCE01134613.1-igkv:0.0103522
):0.0674181
,
(
(
V59RF-ADFV01138112.1-igkv:0.0264584
,
V100RF-ADFV01106214.1-igkv:0.0264584
):0.0563855
,
(
V47RF-AQIB01144274.1-igkv:0.0561794
,
(
V34RF-JABR01076263.1-igkv:0.0588159
,
(
(
V257RF-AHZZ01189923.1-igkv:0.0319889
,
V209RF-JYKQ01076937.1-igkv:0.0319889
):0.0128197
,
(
V221RF-AQIA01017126.1-igkv:0.0433494
,
(
V43RF-CABD02196587.1-igkv:0.0319889
,
V146RF-AACZ03151858.1-igkv:0.0319889
):0.0113605
):0.00145919
):0.0140073
):-0.00263651
):0.0266644
):-0.0050736
):0.00442211
,
(
(
(
V206RF-JYKQ01075085.1-igkv:0.0347963
,
(
V240RF-AHZZ01107399.1-igkv:0.00513877
,
V174RF-JYKQ01044662.1-igkv:0.00513877
):0.0296576
):0.0334627
,
(
V147RF-AACZ03151979.1-igkv:0.08007
,
(
V51RF-AHZZ01105091.1-igkv:0.0787361
,
(
V105RF-ABGA01318850.1-igkv:0.0800157
,
(
V32RF-JABR01076261.1-igkv:0.0624452
,
(
V233RF-AHZZ01106331.1-igkv:0.052839
,
(
V155RF-ABGA01180644.1-igkv:0.057422
,
(
V223RF-AQIA01017128.1-igkv:0.0398603
,
(
V140RF-AACZ03151855.1-igkv:0.0387103
,
(
V45RF-AQIB01144273.1-igkv:0.036934
,
(
V85RF-ABGA01285649.1-igkv:0.0334137
,
(
V157RF-CABD02196521.1-igkv:0.0210101
,
(
V141RF-AACZ03151855.1-igkv:0.0103522
,
V40RF-ADFV01106195.1-igkv:0.0103522
):0.0106579
):0.0124036
):0.00352035
):0.00177626
):0.00114999
):0.0175617
):-0.00458297
):0.00960619
):0.0175705
):-0.00127964
):0.00133393
):-0.011811
):0.0136186
,
(
(
(
(
V60RF-AHZZ01109397.1-igkv:0.00513877
,
V50RF-JYKQ01051981.1-igkv:0.00513877
):0.0268501
,
V214RF-JYKQ01081225.1-igkv:0.0319889
):0.0220226
,
(
(
V50RF-AQIB01144276.1-igkv:0.0360463
,
(
V242RF-AHZZ01110488.1-igkv:0.0288832
,
(
V48RF-AQIB01144274.1-igkv:0.0271805
,
(
V228RF-AQIA01017130.1-igkv:0.0278616
,
(
(
V229RF-AQIA01017133.1-igkv:0.0103522
,
V172RF-JYKQ01044654.1-igkv:0.0103522
):0.00933593
,
(
V76RF-AHZZ01176978.1-igkv:0.0103522
,
(
V243RF-AHZZ01111138.1-igkv:-0
,
V246RF-AHZZ01111367.1-igkv:-0
):0.0103522
):0.00933593
):0.00817346
):-0.000681039
):0.00170273
):0.00716301
):0.0125771
,
(
(
V230RF-AQIA01017135.1-igkv:0.0103522
,
V145RF-AQIB01156901.1-igkv:0.0103522
):0.0316049
,
(
V35RF-JABR01076263.1-igkv:0.0320311
,
(
V50RF-AGCE01134614.1-igkv:0.0210101
,
V53RF-AGCE01134616.1-igkv:0.0210101
):0.011021
):0.00992604
):0.00666621
):0.00538823
):0.0346052
,
(
(
(
V79RF-AJFE01002289.1-igkv:0.00513877
,
V174RF-AACZ03015562.1-igkv:0.00513877
):0.055101
,
(
V130RF-ADFV01132961.1-igkv:0.0419457
,
(
V8RF-AJFE01011588.1-igkv:0.0237342
,
(
V190RF-ABGA01257772.1-igkv:0.015642
,
V46RF-CABD02199693.1-igkv:0.015642
):0.00809225
):0.0182115
):0.0182941
):0.0174124
,
(
V33RF-AGCE01134599.1-igkv:0.0794479
,
(
V145RF-ADFV01132961.1-igkv:0.0746138
,
(
V175RF-AACZ03015564.1-igkv:0.0638234
,
(
V84RF-ABGA01285648.1-igkv:0.0606404
,
(
V193RF-ABGA01276916.1-igkv:0.045463
,
(
V156RF-ABGA01180644.1-igkv:0.0508292
,
(
V41RF-ADFV01106195.1-igkv:0.044929
,
(
V144RF-AACZ03151857.1-igkv:0.0348817
,
(
V110RF-ABGA01356721.1-igkv:0.0264584
,
V38RF-CABD02196563.1-igkv:0.0264584
):0.00842334
):0.0100473
):0.00590019
):-0.00536615
):0.0151773
):0.00318308
):0.0107904
):0.00483411
):-0.00179578
):0.0109646
):-0.00673919
):0.000314757
):0.00821245
):0.0156458
):0.0107262
):0.275407
):0.191221
):0.42191
):0.051641
):0.436
):0.117836
):0.64015
,
(
(
(
(
(
V45RF-ADFV01126740.1-iglv:0.0529027
,
(
(
V125RF-JABR01071861.1-iglv:0.0243345
,
(
V216RF-JYKQ01098166.1-iglv:0.016486
,
(
V192RF-AHZZ01089507.1-iglv:0.0152042
,
(
V63RF-AQIB01146122.1-iglv:0.0100403
,
V69RF-AQIB01146122.1-iglv:0.0100403
):0.00516389
):0.00128178
):0.00784849
):-0.00425626
,
(
(
V16RF-AQIA01007585.1-iglv:0.0100403
,
V189RF-AHZZ01089506.1-iglv:0.0100403
):0.00773664
,
(
V127RF-JABR01071862.1-iglv:0.0126039
,
(
V233RF-JYKQ01126579.1-iglv:0.00498507
,
V243RF-JYKQ01126586.1-iglv:0.00498507
):0.00761883
):0.00517308
):0.00230126
):0.0328245
):0.0369424
,
(
V98RF-AJFE01020628.1-iglv:0.0876227
,
(
(
V102RF-AJFE01020632.1-iglv:0.0419423
,
V179RF-ABGA01252241.1-iglv:0.0419423
):0.0325193
,
(
(
V43RF-ADFV01126738.1-iglv:0.0519932
,
(
V101RF-AJFE01020631.1-iglv:0.0350915
,
(
V185RF-AHZZ01089506.1-iglv:0.021744
,
(
(
V17RF-AQIA01007586.1-iglv:0.0100403
,
V66RF-AQIB01146122.1-iglv:0.0100403
):0.00512712
,
V238RF-JYKQ01126581.1-iglv:0.0151675
):0.00657658
):0.0133474
):0.0169017
):0.0162517
,
(
(
V241RF-JYKQ01126585.1-iglv:0.0075127
,
(
V22RF-AQIA01007587.1-iglv:0.00498507
,
V64RF-AQIB01146122.1-iglv:0.00498507
):0.00252764
):0.0700751
,
(
(
V52RF-CABD02231360.1-iglv:0.0203681
,
V164RF-AACZ03176953.1-iglv:0.0203681
):0.0297206
,
(
(
V195RF-AHZZ01089508.1-iglv:0.0256441
,
V3RF-JABR01016432.1-iglv:0.0256441
):0.0199287
,
(
V246RF-JYKQ01126589.1-iglv:0.0420041
,
(
V61RF-AQIB01146122.1-iglv:0.0421084
,
(
V27RF-AQIA01007589.1-iglv:0.0203681
,
V130RF-JABR01071862.1-iglv:0.0203681
):0.0217403
):-0.000104338
):0.00356865
):0.00451597
):0.0274991
):-0.00934286
):0.00621674
):0.0131611
):0.00222242
):0.0609951
,
(
V60RF-ABDC01398089.1-iglv:0.141696
,
(
V14RF-JZKE01249931.1-iglv:0.105757
,
(
V69RF-ABDC01418168.1-iglv:0.0980261
,
(
V102RF-ABDC01556235.1-iglv:0.087373
,
(
(
V13RF-ABDC01296165.1-iglv:0.00498507
,
V15RF-ABDC01296166.1-iglv:0.00498507
):0.05184
,
(
V138RF-ABDC01582683.1-iglv:0.0503791
,
(
V17RF-JZKE01249933.1-iglv:0.0203681
,
V74RF-JZKE01238800.1-iglv:0.0203681
):0.030011
):0.00644602
):0.0305479
):0.0106531
):0.00773095
):0.0359391
):0.00914414
):0.19177
,
(
(
V107RF-AJFE01022798.1-iglv:-0
,
V187RF-AACZ03127321.1-iglv:-0
):0.140989
,
(
V15RF-JZKE01249932.1-iglv:-0
,
V16RF-JZKE01249932.1-iglv:-0
):0.140989
):0.201621
):1.77755
,
(
(
V166RF-AACZ03176965.1-iglv:0.489873
,
(
(
(
V108RF-ABGA01335280.1-iglv:0.0369781
,
(
(
V108RF-AJFE01022798.1-iglv:-0
,
V188RF-AACZ03127321.1-iglv:-0
):0.0205777
,
V47RF-CABD02231299.1-iglv:0.0205777
):0.0164004
):0.0270554
,
(
V112RF-AGCE01147939.1-iglv:0.068428
,
(
V6RF-JABR01043229.1-iglv:0.0443103
,
(
V137RF-JABR01077603.1-iglv:0.0436432
,
(
V229RF-AQIB01146043.1-iglv:0.0232438
,
(
V33RF-AQIA01007605.1-iglv:0.0153224
,
(
V27RF-AHZZ01097944.1-iglv:-0
,
V81RF-JYKQ01114545.1-iglv:-0
):0.0153224
):0.00792139
):0.0203994
):0.00066708
):0.0241177
):-0.00439451
):0.422769
,
(
V184RF-ABGA01252248.1-iglv:0.347025
,
(
(
(
V99RF-AGCE01112648.1-iglv:0.102339
,
(
V115RF-JABR01071856.1-iglv:0.046793
,
(
V262RF-AHZZ01198553.1-iglv:0.0522652
,
(
V59RF-CABD02231416.1-iglv:0.039339
,
(
V172RF-ABGA01252219.1-iglv:0.0386772
,
(
(
V85RF-AJFE01010827.1-iglv:-0
,
V119RF-AACZ03127131.1-iglv:-0
):0.0316513
,
(
V12RF-AQIA01007576.1-iglv:0.0154805
,
V79RF-AQIB01146137.1-iglv:0.0154805
):0.0161708
):0.00702585
):0.000661809
):0.0129262
):-0.00547222
):0.0555465
):0.0929253
,
(
(
V22RF-JZKE01249955.1-iglv:0.0103522
,
V28RF-JZKE01249958.1-iglv:0.0103522
):0.159058
,
(
V22RF-ABDC01347843.1-iglv:0.125014
,
(
(
V124RF-ABDC01418360.1-iglv:0.0655039
,
(
V82RF-ABDC01449636.1-iglv:0.0237342
,
(
V25RF-ABDC01349230.1-iglv:0.00513877
,
V50RF-ABDC01384523.1-iglv:0.00513877
):0.0185954
):0.0417697
):0.0521115
,
(
V25RF-JZKE01249957.1-iglv:0.0685371
,
(
V23RF-ABDC01347844.1-iglv:0.0568527
,
V24RF-ABDC01349227.1-iglv:0.0568527
):0.0116843
):0.0490783
):0.0073982
):0.0443967
):0.0258545
):0.0481335
,
(
(
(
(
V91RF-AJFE01017581.1-iglv:-0
,
V127RF-AACZ03127143.1-iglv:-0
):0.0104605
,
V65RF-CABD02231431.1-iglv:0.0104605
):0.111403
,
(
(
(
(
V36RF-AQIA01009600.1-iglv:0.0207916
,
V230RF-AHZZ01105201.1-iglv:0.0207916
):0.0164123
,
V224RF-JYKQ01126546.1-iglv:0.0372039
):0.0300733
,
(
(
V14RF-AQIA01007576.1-iglv:0.0154805
,
V265RF-AHZZ01198553.1-iglv:0.0154805
):0.0521927
,
(
V226RF-AHZZ01105200.1-iglv:0.0591694
,
(
(
V78RF-AQIB01146137.1-iglv:-0
,
V81RF-AQIB01146138.1-iglv:-0
):0.0528424
,
(
(
V8RF-AQIA01007576.1-iglv:0.0316513
,
V225RF-AHZZ01105199.1-iglv:0.0316513
):0.0167282
,
(
V116RF-JABR01071856.1-iglv:0.0537073
,
(
V73RF-AQIB01146133.1-iglv:0.0501633
,
(
V230RF-JYKQ01126546.1-iglv:0.0344483
,
(
(
V11RF-AQIA01007576.1-iglv:0.0207916
,
V119RF-JABR01071856.1-iglv:0.0207916
):0.00538962
,
V226RF-JYKQ01126546.1-iglv:0.0261813
):0.008267
):0.015715
):0.00354405
):-0.00532775
):0.00446284
):0.00632698
):0.00850383
):-0.000396036
):0.039492
,
(
V29RF-JZKE01249959.1-iglv:0.0946121
,
(
(
V98RF-AGCE01112648.1-iglv:0.054378
,
V100RF-AGCE01112652.1-iglv:0.054378
):0.026414
,
(
(
V53RF-ADFV01126759.1-iglv:0.0627419
,
(
V52RF-ADFV01126759.1-iglv:0.0573765
,
(
(
V170RF-ABGA01252219.1-iglv:0.00508649
,
V171RF-ABGA01252219.1-iglv:0.00508649
):0.0449654
,
(
V118RF-AACZ03127131.1-iglv:0.0316926
,
(
V84RF-AJFE01010827.1-iglv:0.0207916
,
V87RF-AJFE01010828.1-iglv:0.0207916
):0.010901
):0.0183594
):0.00732454
):0.00536541
):0.0230605
,
(
V166RF-ABGA01252210.1-iglv:0.080618
,
(
V169RF-ABGA01252218.1-iglv:0.055023
,
(
V62RF-CABD02231422.1-iglv:0.0154805
,
V122RF-AACZ03127139.1-iglv:0.0154805
):0.0395425
):0.025595
):0.0051844
):-0.00501038
):0.0138201
):0.0121571
):0.0150943
):0.0403369
,
(
(
(
V176RF-ABGA01252220.1-iglv:0.0380123
,
V51RF-ADFV01126759.1-iglv:0.0380123
):0.0490108
,
(
V77RF-AQIB01146137.1-iglv:0.0380123
,
V118RF-JABR01071856.1-iglv:0.0380123
):0.0490108
):0.0637708
,
(
(
(
V261RF-AHZZ01198551.1-iglv:0.0335053
,
(
(
V85RF-AQIB01146141.1-iglv:0.015642
,
V108RF-JABR01071855.1-iglv:0.015642
):0.00567676
,
(
V3RF-AQIA01007574.1-iglv:0.0161471
,
V218RF-JYKQ01126545.1-iglv:0.0161471
):0.00517159
):0.0121866
):0.0168918
,
(
V54RF-ADFV01126760.1-iglv:0.0429056
,
(
(
(
V93RF-AJFE01017584.1-iglv:-0
,
V124RF-AACZ03127139.1-iglv:-0
):0.0207916
,
V167RF-ABGA01252215.1-iglv:0.0207916
):0.00538962
,
V63RF-CABD02231427.1-iglv:0.0261813
):0.0167244
):0.0074915
):0.0532863
,
(
(
V178RF-ABGA01252221.1-iglv:0.0583236
,
(
V264RF-AHZZ01198553.1-iglv:0.0590831
,
(
V57RF-CABD02231415.1-iglv:0.0316926
,
(
V117RF-AACZ03127129.1-iglv:0.0207916
,
V120RF-AACZ03127135.1-iglv:0.0207916
):0.010901
):0.0273905
):-0.000759445
):0.0355631
,
(
V49RF-ADFV01126755.1-iglv:0.0788951
,
(
(
(
V88RF-AJFE01010829.1-iglv:-0
,
V116RF-AACZ03127129.1-iglv:-0
):0.0104605
,
V56RF-CABD02231410.1-iglv:0.0104605
):0.0421991
,
(
V228RF-AHZZ01105201.1-iglv:0.0437792
,
V222RF-JYKQ01126546.1-iglv:0.0437792
):0.00888039
):0.0262355
):0.0149916
):0.00979671
):0.0471105
):0.0114065
):0.0811979
):0.103627
):0.139777
):0.00307077
):1.24688
,
(
(
V23RF-JZKE01249956.1-igkv:0.334535
,
(
(
(
(
V70RF-ABDC01418168.1-iglv:0.0201628
,
V103RF-ABDC01570800.1-iglv:0.0201628
):0.0675739
,
(
V79RF-ABDC01442374.1-iglv:0.0760456
,
(
(
V21RF-ABDC01342328.1-iglv:0.0309971
,
V126RF-ABDC01425625.1-iglv:0.0309971
):0.0280902
,
(
V68RF-ABDC01417539.1-iglv:0.0515975
,
(
V59RF-ABDC01398089.1-iglv:0.0575958
,
(
(
V14RF-ABDC01296165.1-iglv:0.0256441
,
(
V33RF-ABDC01359388.1-iglv:-0
,
V129RF-ABDC01465190.1-iglv:-0
):0.0256441
):0.00979703
,
(
V19RF-JZKE01249944.1-iglv:0.0406258
,
(
(
V135RF-ABDC01540867.1-iglv:-0
,
V139RF-ABDC01624510.1-iglv:-0
):0.0283206
,
(
V72RF-JZKE01238797.1-iglv:0.0203681
,
V73RF-JZKE01238799.1-iglv:0.0203681
):0.0079525
):0.0123052
):-0.00518472
):0.0221547
):-0.00599822
):0.00748982
):0.0169582
):0.0116911
):0.0299391
,
(
(
(
V135RF-JABR01077601.1-iglv:0.0455268
,
(
(
V31RF-AQIA01007600.1-iglv:0.0177426
,
(
V29RF-AHZZ01097949.1-iglv:0.00503527
,
V212RF-JYKQ01080923.1-iglv:0.00503527
):0.0127073
):0.0313482
,
(
V128RF-ADFV01132915.1-iglv:0.0470498
,
(
V58RF-AQIB01146122.1-iglv:0.0323749
,
(
V37RF-AHZZ01099970.1-iglv:0.0283987
,
(
V28RF-AQIA01007590.1-iglv:0.0203681
,
V75RF-JYKQ01062966.1-iglv:0.0203681
):0.00803057
):0.00397625
):0.0146748
):0.00204099
):-0.00356396
):-0.000251874
,
(
V185RF-ABGA01252248.1-iglv:0.0360539
,
V126RF-ADFV01132915.1-iglv:0.0360539
):0.00922104
):0.0470462
,
(
(
V106RF-AJFE01022796.1-iglv:0.0259099
,
(
V167RF-AACZ03176987.1-iglv:0.0153599
,
(
V49RF-CABD02231318.1-iglv:0.0101422
,
V185RF-AACZ03127313.1-iglv:0.0101422
):0.00521776
):0.0105499
):0.0447854
,
(
V186RF-ABGA01252249.1-iglv:0.0368125
,
(
V133RF-JABR01077601.1-iglv:0.0364292
,
V125RF-ADFV01132915.1-iglv:0.0364292
):0.000383258
):0.0338827
):0.0216259
):0.0253546
):0.138196
,
(
V65RF-AQIB01146122.1-iglv:0.208685
,
(
V26RF-JZKE01249957.1-iglv:0.139175
,
(
(
V88RF-AQIB01146141.1-iglv:0.0193412
,
(
V0RF-AQIA01007569.1-iglv:0.0183142
,
(
V259RF-AHZZ01198550.1-iglv:0.00524662
,
V221RF-JYKQ01126545.1-iglv:0.00524662
):0.0130676
):0.00102694
):0.105363
,
(
(
V164RF-ABGA01252206.1-iglv:0.077871
,
(
(
V107RF-JABR01071855.1-iglv:0.0154805
,
V113RF-JABR01071856.1-iglv:0.0154805
):0.0521698
,
(
V64RF-CABD02231427.1-iglv:0.0729895
,
(
V86RF-AJFE01010827.1-iglv:0.0667824
,
(
V228RF-JYKQ01126546.1-iglv:0.0710859
,
(
V168RF-ABGA01252216.1-iglv:0.0601331
,
(
(
V94RF-AJFE01017584.1-iglv:0.0100403
,
V125RF-AACZ03127139.1-iglv:0.0100403
):0.0438538
,
(
(
V117RF-JABR01071856.1-iglv:0.0304966
,
(
V9RF-AQIA01007576.1-iglv:0.0303452
,
(
V231RF-JYKQ01126546.1-iglv:0.0233806
,
(
V222RF-AHZZ01105198.1-iglv:0.0208309
,
(
V6RF-AQIA01007575.1-iglv:0.0102461
,
V84RF-AQIB01146140.1-iglv:0.0102461
):0.0105848
):0.00254967
):0.00696462
):0.0001514
):-0.000271527
,
(
V50RF-ADFV01126756.1-iglv:0.0299781
,
(
(
(
V95RF-AJFE01017586.1-iglv:-0
,
V208RF-AACZ03191230.1-iglv:-0
):0.0100403
,
V123RF-AACZ03127139.1-iglv:0.0100403
):0.0108298
,
(
V229RF-AHZZ01105201.1-iglv:0.0102461
,
V106RF-JABR01071855.1-iglv:0.0102461
):0.0106241
):0.00910792
):0.000246959
):0.0236691
):0.006239
):0.0109528
):-0.0043035
):0.00620709
):-0.00533923
):0.0102207
):0.0103077
,
(
V224RF-AHZZ01105199.1-iglv:0.0821483
,
(
(
V61RF-CABD02231421.1-iglv:0.037994
,
(
V199RF-AACZ03177116.1-iglv:0.0323952
,
(
V175RF-ABGA01252219.1-iglv:0.0283206
,
(
V173RF-ABGA01252219.1-iglv:0.0203681
,
V174RF-ABGA01252219.1-iglv:0.0203681
):0.0079525
):0.00407457
):0.00559879
):0.0187361
,
(
(
V260RF-AHZZ01198551.1-iglv:0.0511323
,
(
V60RF-CABD02231419.1-iglv:0.035487
,
(
(
V258RF-AHZZ01198550.1-iglv:-0
,
V220RF-JYKQ01126545.1-iglv:-0
):0.0235061
,
(
(
V266RF-AHZZ01198553.1-iglv:0.0100403
,
V217RF-JYKQ01126545.1-iglv:0.0100403
):0.0160761
,
(
V87RF-AQIB01146141.1-iglv:0.0235851
,
(
V82RF-AQIB01146140.1-iglv:0.0155189
,
(
V1RF-AQIA01007574.1-iglv:0.0102461
,
V5RF-AQIA01007574.1-iglv:0.0102461
):0.00527277
):0.00806624
):0.0025313
):-0.00261033
):0.0119809
):0.0156453
):-0.00324553
,
(
V109RF-JABR01071855.1-iglv:0.0365524
,
(
V76RF-AQIB01146136.1-iglv:0.0275895
,
(
V223RF-JYKQ01126546.1-iglv:0.0181361
,
(
V35RF-AQIA01009600.1-iglv:0.0154805
,
V72RF-AQIB01146133.1-iglv:0.0154805
):0.00265555
):0.00945343
):0.0089629
):0.0113343
):0.00884333
):0.0254182
):0.00603036
):0.0365253
):0.0144709
):0.0695098
):0.0471874
):0.0786631
):0.837649
,
(
(
V24RF-JZKE01249956.1-iglv:0.142384
,
(
(
V13RF-AQIA01007576.1-igkv:0.00508649
,
V263RF-AHZZ01198553.1-igkv:0.00508649
):0.0539526
,
(
V37RF-AQIA01009608.1-iglv:0.0428411
,
V80RF-AQIB01146138.1-iglv:0.0428411
):0.016198
):0.0833444
):0.0771115
,
(
(
(
V31RF-ABDC01352111.1-iglv:0.0677794
,
(
V62RF-ABDC01399713.1-iglv:-0
,
V93RF-ABDC01498106.1-iglv:-0
):0.0677794
):0.0318593
,
(
V71RF-JZKE01238797.1-iglv:0.0792502
,
(
V19RF-ABDC01318812.1-iglv:0.062685
,
(
V18RF-ABDC01318810.1-iglv:0.0368125
,
(
V73RF-ABDC01422153.1-iglv:-0
,
V84RF-ABDC01466438.1-iglv:-0
):0.0368125
):0.0258725
):0.0165652
):0.0203885
):0.0546212
,
(
(
V101RF-AGCE01112674.1-iglv:0.142779
,
(
(
V120RF-JABR01071859.1-iglv:0.0490322
,
(
(
(
V15RF-AQIA01007584.1-iglv:0.0100403
,
V190RF-AHZZ01089506.1-iglv:0.0100403
):0.0156037
,
V70RF-AQIB01146123.1-iglv:0.0256441
):0
,
V234RF-JYKQ01126579.1-iglv:0.0256441
):0.0233882
):0.0505926
,
(
V131RF-JABR01071862.1-iglv:0.115416
,
(
(
V244RF-JYKQ01126586.1-iglv:0.0192639
,
(
(
V78RF-JABR01189674.1-iglv:-0
,
V128RF-JABR01071862.1-iglv:-0
):0.0177678
,
(
V25RF-AQIA01007588.1-iglv:0.0151675
,
V193RF-AHZZ01089507.1-iglv:0.0151675
):0.00260033
):0.00149608
):0.057068
,
(
(
V4RF-JABR01016432.1-iglv:0.0463508
,
(
V184RF-AHZZ01089506.1-iglv:0.0364697
,
(
V23RF-AQIA01007587.1-iglv:0.0256441
,
V242RF-JYKQ01126585.1-iglv:0.0256441
):0.0108257
):0.00988102
):0.0155536
,
(
(
(
V180RF-ABGA01252241.1-iglv:0.0203681
,
V183RF-ABGA01252243.1-iglv:0.0203681
):0.0347533
,
(
V126RF-JABR01071861.1-iglv:0.0475597
,
(
V62RF-AQIB01146122.1-iglv:0.0323552
,
(
V247RF-JYKQ01126589.1-iglv:0.0230061
,
(
V24RF-AQIA01007588.1-iglv:0.0100403
,
V196RF-AHZZ01089508.1-iglv:0.0100403
):0.0129657
):0.00934909
):0.0152046
):0.00756163
):0.00121746
,
(
(
V165RF-AACZ03176953.1-iglv:0.0230254
,
(
V99RF-AJFE01020631.1-iglv:0.0256826
,
(
V53RF-CABD02231362.1-iglv:0.0100403
,
V54RF-CABD02231364.1-iglv:0.0100403
):0.0156423
):-0.00265726
):0.02454
,
(
V44RF-ADFV01126738.1-iglv:0.0364697
,
(
V48RF-ADFV01126742.1-iglv:0.0203681
,
V129RF-ADFV01132918.1-iglv:0.0203681
):0.0161016
):0.0110957
):0.00877342
):0.00556556
):0.0144275
):0.0390839
):-0.015791
):0.043154
):-0.00492612
,
(
(
V18RF-AQIA01007586.1-iglv:0.0727089
,
(
V46RF-ADFV01126741.1-iglv:0.0670133
,
(
V239RF-JYKQ01126581.1-iglv:0.0456835
,
(
V186RF-AHZZ01089506.1-iglv:0.0409933
,
(
V182RF-ABGA01252243.1-iglv:0.0391858
,
(
(
V103RF-AJFE01020634.1-iglv:-0
,
V50RF-CABD02231359.1-iglv:-0
):0.00498507
,
V163RF-AACZ03176953.1-iglv:0.00498507
):0.0342007
):0.00180754
):0.00469016
):0.0213298
):0.00569564
):0.0480449
,
(
V107RF-AGCE01135277.1-iglv:0.120884
,
(
(
V19RF-AQIA01007586.1-iglv:0.0421646
,
(
V67RF-AQIB01146122.1-iglv:0.0313208
,
V240RF-JYKQ01126581.1-iglv:0.0313208
):0.0108438
):0.0285111
,
(
V47RF-ADFV01126741.1-iglv:0.0700787
,
(
V123RF-JABR01071860.1-iglv:0.0611511
,
(
(
V188RF-AHZZ01089506.1-iglv:0.0205777
,
V237RF-JYKQ01126580.1-iglv:0.0205777
):0.0331012
,
(
(
V21RF-AQIA01007586.1-iglv:0.0313612
,
(
V124RF-JABR01071860.1-iglv:0.0203681
,
V129RF-JABR01071862.1-iglv:0.0203681
):0.0109931
):0.0230139
,
(
(
V20RF-AQIA01007586.1-iglv:0.00503527
,
V187RF-AHZZ01089506.1-iglv:0.00503527
):0.0435727
,
(
V236RF-JYKQ01126580.1-iglv:0.0354603
,
(
V68RF-AQIB01146122.1-iglv:0.0361571
,
(
V59RF-AQIB01146122.1-iglv:0.0340667
,
(
(
V26RF-AQIA01007589.1-iglv:0.0101422
,
V245RF-JYKQ01126589.1-iglv:0.0101422
):0.0143355
,
(
V97RF-AJFE01020628.1-iglv:0.0151675
,
V38RF-AHZZ01099973.1-iglv:0.0151675
):0.00931022
):0.00958899
):0.00209041
):-0.000696801
):0.0131477
):0.00576713
):-0.000696212
):0.00747222
):0.00892764
):0.000596955
):0.0502078
):-0.000129692
):0.0170989
):0.0164071
):0.0652351
):0.837649
):0.40923
):0.530666
):0.356619
):3.31444
,
(
(
(
(
V82RF-AGCE01026522.1-trav:0.0483594
,
(
V165RF-JYKQ01026655.1-trav:0.0412081
,
(
(
(
V23RF-CABD02105615.1-trav:0.00530225
,
V85RF-ADFV01192042.1-trav:0.00530225
):0.0108658
,
(
V84RF-AACZ03097624.1-trav:0.00530225
,
V205RF-AACZ03179105.1-trav:0.00530225
):0.0108658
):0.0177349
,
(
V201RF-JYKQ01062939.1-trav:0.0287781
,
(
V178RF-JABR01098595.1-trav:0.0189205
,
(
(
V146RF-AQIA01064159.1-trav:0.010684
,
(
V204RF-AHZZ01093949.1-trav:-0
,
V202RF-JYKQ01066660.1-trav:-0
):0.010684
):0.00546317
,
V204RF-AQIB01128641.1-trav:0.0161471
):0.00277333
):0.00985761
):0.00512481
):0.00730525
):0.00715121
):0.923062
,
(
V24RF-CABD02105616.1-trav:0.0622121
,
(
V180RF-JABR01098595.1-trav:0.0305212
,
(
V149RF-AQIA01064166.1-trav:0.0276281
,
V206RF-AHZZ01093949.1-trav:0.0276281
):0.00289313
):0.0316908
):0.909209
):0.207548
,
(
V74RF-AGCE01026519.1-trav:1.23297
,
(
(
(
(
V67RF-AQIA01046502.1-trgv:-0
,
V1RF-JYKQ01003191.1-trgv:-0
):0.0253837
,
(
V1RF-AQIB01018215.1-trgv:0.0201628
,
V9RF-JABR01052882.1-trgv:0.0201628
):0.0052209
):0.0572885
,
(
V95RF-ADFV01046571.1-trgv:0.0655237
,
(
(
V29RF-AJFE01038666.1-trgv:0.00994053
,
V2RF-AACZ03050973.1-trgv:0.00994053
):0.0470939
,
(
V90RF-ABGA01290201.1-trgv:0.0549362
,
(
V167RF-CABD02337338.1-trgv:0.0215237
,
(
V27RF-AJFE01038664.1-trgv:0.0175892
,
(
V91RF-ABGA01290202.1-trgv:0.00493586
,
V149RF-ABGA01132346.1-trgv:0.00493586
):0.0126533
):0.00393456
):0.0334124
):0.00209825
):0.0084893
):0.0171485
):0.0648115
,
(
V96RF-ADFV01046573.1-trgv:0.128312
,
(
(
V68RF-AQIA01046502.1-trgv:0.0281093
,
(
(
V0RF-AQIB01018214.1-trgv:0.0175892
,
(
V66RF-AQIA01046502.1-trgv:0.00493586
,
V0RF-AHZZ01030316.1-trgv:0.00493586
):0.0126533
):0.00919799
,
(
V2RF-AQIB01018217.1-trgv:0.0150156
,
V0RF-JYKQ01003191.1-trgv:0.0150156
):0.0117716
):0.00132208
):0.0466499
,
(
V89RF-ABGA01290201.1-trgv:0.0472079
,
(
V28RF-AJFE01038665.1-trgv:0.0306801
,
V169RF-CABD02337341.1-trgv:0.0306801
):0.0165278
):0.0275513
):0.0535528
):0.0191717
):1.08549
):-0.0539998
):3.52236
,
(
(
(
(
(
V148RF-ABGA01113133.1-trav:0.0316235
,
(
(
(
V52RF-AJFE01069974.1-trav:-0
,
V63RF-AACZ03097611.1-trav:-0
):0.0158068
,
V2RF-CABD02105568.1-trav:0.0158068
):0.0102461
,
(
V61RF-ADFV01192035.1-trav:0.0198766
,
(
V118RF-AHZZ01044061.1-trav:0.00782629
,
(
V125RF-AQIA01064137.1-trav:0.00519213
,
V57RF-JYKQ01054925.1-trav:0.00519213
):0.00263416
):0.0120503
):0.00617633
):0.00557058
):0.250277
,
(
(
V88RF-AGCE01026530.1-trav:0.0288493
,
(
V69RF-ADFV01192037.1-trav:0.0253854
,
(
(
V60RF-AJFE01069975.1-trav:-0
,
V70RF-AACZ03097613.1-trav:-0
):0.01852
,
(
V135RF-AQIA01064146.1-trav:0.00519213
,
(
V217RF-AQIB01128644.1-trav:-0
,
V190RF-JABR01098600.1-trav:-0
):0.00519213
):0.0133278
):0.00686539
):0.00346396
):0.192132
,
(
V52RF-ABDC01388284.1-trav:0.167784
,
(
(
V196RF-JABR01098603.1-trav:0.0336794
,
(
V62RF-JYKQ01054940.1-trav:0.0384221
,
(
V189RF-JABR01098600.1-trav:0.0303216
,
(
V65RF-JYKQ01054942.1-trav:0.0261154
,
(
V216RF-AQIB01128644.1-trav:0.0282236
,
(
(
V131RF-AQIA01064144.1-trav:0.00519213
,
V81RF-AHZZ01198216.1-trav:0.00519213
):0.0106347
,
(
V134RF-AQIA01064146.1-trav:0.0104605
,
V54RF-AHZZ01107544.1-trav:0.0104605
):0.00536635
):0.0123968
):-0.00210816
):0.00420621
):0.00810048
):-0.00474269
):0.0296047
,
(
(
V63RF-AJFE01069975.1-trav:-0
,
V73RF-AACZ03097614.1-trav:-0
):0.0660441
,
(
V8RF-CABD02105586.1-trav:0.0468108
,
(
V145RF-ABGA01083939.1-trav:0.045521
,
(
V68RF-ADFV01192037.1-trav:0.0323768
,
(
V139RF-ABGA01083934.1-trav:0.0267414
,
V72RF-ADFV01192038.1-trav:0.0267414
):0.00563541
):0.0131441
):0.00128985
):0.0192333
):-0.00275999
):0.1045
):0.0531971
):0.0609192
):0.174847
,
(
(
(
V60RF-JZKE01143913.1-trav:0.0953753
,
(
V127RF-ABDC01454736.1-trav:0.0844264
,
(
V56RF-JZKE01143903.1-trav:0.0727048
,
(
(
(
V138RF-AQIA01064146.1-trav:0.00524662
,
V220RF-AQIB01128644.1-trav:0.00524662
):0
,
(
V57RF-AHZZ01107545.1-trav:-0
,
V68RF-JYKQ01054942.1-trav:-0
):0.00524662
):0.0383404
,
(
V75RF-ADFV01192039.1-trav:0.0312722
,
(
V124RF-ABGA01387833.1-trav:0.0242458
,
(
(
V66RF-AJFE01069976.1-trav:-0
,
V75RF-AACZ03097618.1-trav:-0
):0.00524662
,
V13RF-CABD02105590.1-trav:0.00524662
):0.0189992
):0.00702643
):0.0123148
):0.0291178
):0.0117216
):0.010949
):0.0800847
,
(
V67RF-JZKE01143916.1-trav:0.120334
,
(
(
(
V57RF-AJFE01069975.1-trav:0.00524662
,
V67RF-AACZ03097613.1-trav:0.00524662
):0.0148741
,
(
V65RF-ADFV01192035.1-trav:0.00790882
,
(
V142RF-ABGA01083939.1-trav:0.00524662
,
V5RF-CABD02105579.1-trav:0.00524662
):0.00266221
):0.0122119
):0.021301
,
(
(
V128RF-AQIA01064138.1-trav:0.0159752
,
(
V213RF-AQIB01128644.1-trav:-0
,
V59RF-JYKQ01054940.1-trav:-0
):0.0159752
):0.0167109
,
V200RF-JABR01098604.1-trav:0.0326861
):0.00873556
):0.0789126
):0.0551258
):0.177723
,
(
V44RF-JZKE01143890.1-trav:0.223196
,
(
V100RF-ABDC01533415.1-trav:0.11607
,
(
V85RF-AGCE01026527.1-trav:0.0478993
,
(
V78RF-ADFV01192039.1-trav:0.0393136
,
(
V119RF-ABGA01386446.1-trav:0.032365
,
(
V185RF-JABR01098598.1-trav:0.0287781
,
(
V32RF-AHZZ01098200.1-trav:0.0134156
,
(
(
V141RF-AQIA01064149.1-trav:-0
,
V71RF-JYKQ01054957.1-trav:-0
):0.00530225
,
V208RF-AQIB01128643.1-trav:0.00530225
):0.00811331
):0.0153625
):0.00358693
):0.0069486
):0.00858564
):0.0681709
):0.107126
):0.129987
):0.103565
):2.03969
,
(
(
(
(
(
V147RF-AQIA01064165.1-trav:0.016984
,
(
V203RF-AHZZ01093949.1-trav:0.0129971
,
(
V145RF-AQIA01064159.1-trav:0.0103522
,
V177RF-JABR01098595.1-trav:0.0103522
):0.0026449
):0.00398693
):0.0105878
,
(
V136RF-ABGA01061552.1-trav:0.0190171
,
(
V84RF-ADFV01192042.1-trav:0.0170036
,
(
V204RF-AACZ03179105.1-trav:0.0129971
,
(
V22RF-CABD02105614.1-trav:0.00513877
,
(
V83RF-AACZ03097624.1-trav:-0
,
V195RF-AACZ03171676.1-trav:-0
):0.00513877
):0.0078583
):0.0040065
):0.00201352
):0.0085547
):0.494689
,
(
V56RF-AACZ03095312.1-trav:0.0219317
,
V191RF-AACZ03171059.1-trav:0.0219317
):0.50033
):0.387291
,
(
(
V60RF-JYKQ01054940.1-trav:0.0263344
,
(
V6RF-CABD02105581.1-trav:0.00923993
,
(
V143RF-ABGA01083939.1-trav:0.00790882
,
(
V58RF-AJFE01069975.1-trav:0.00524662
,
V68RF-AACZ03097613.1-trav:0.00524662
):0.00266221
):0.0013311
):0.0170945
):0.910021
,
(
(
(
(
V26RF-AJFE01024273.1-trdv:-0
,
V180RF-AACZ03095321.1-trdv:-0
):0.0101422
,
V113RF-CABD02105639.1-trdv:0.0101422
):0.0157677
,
V150RF-ADFV01192057.1-trdv:0.0259099
):0.772005
,
(
(
(
(
V20RF-CABD02105611.1-trdv:0.0362427
,
(
V81RF-AACZ03097622.1-trdv:0.0238154
,
(
(
(
V0RF-AJFE01000016.1-trdv:-0
,
V72RF-AJFE01069977.1-trdv:-0
):0
,
V82RF-AJFE01010527.1-trdv:-0
):0.015642
,
V202RF-AACZ03179105.1-trdv:0.015642
):0.00817346
):0.0124273
):0.0481306
,
(
(
V202RF-AQIB01128641.1-trav:0.0347963
,
(
V208RF-AHZZ01093953.1-trav:0.00513877
,
(
V167RF-JYKQ01026665.1-trav:-0
,
V204RF-JYKQ01066669.1-trav:-0
):0.00513877
):0.0296576
):0.0142988
,
V166RF-JYKQ01026663.1-trav:0.0490951
):0.0352782
):0.101931
,
(
V92RF-ABDC01497734.1-trdv:0.148528
,
(
V41RF-JZKE01143873.1-trdv:0.11939
,
V43RF-JZKE01143874.1-trdv:0.11939
):0.0291387
):0.0377763
):0.177854
,
(
(
V46RF-JZKE01143891.1-trav:0.128435
,
(
V86RF-AGCE01026527.1-trdv:0.0911376
,
(
V120RF-ABGA01386446.1-trdv:0.0631148
,
(
(
(
V69RF-AJFE01069976.1-trdv:-0
,
V78RF-AACZ03097619.1-trdv:-0
):0.0207916
,
V16RF-CABD02105598.1-trdv:0.0207916
):0.035357
,
(
V79RF-ADFV01192039.1-trdv:0.0553086
,
(
V33RF-AHZZ01098200.1-trav:0.0372462
,
(
V186RF-JABR01098598.1-trav:0.0289163
,
(
(
V142RF-AQIA01064149.1-trav:0.0102461
,
V72RF-JYKQ01054957.1-trav:0.0102461
):0.0159352
,
V209RF-AQIB01128643.1-trav:0.0261813
):0.00273504
):0.00832991
):0.0180624
):0.000840083
):0.00696612
):0.0280228
):0.0372978
):0.181005
,
(
(
V78RF-AGCE01026520.1-trdv:0.0831397
,
(
V33RF-JZKE01143868.1-trav:0.0639443
,
(
(
V91RF-ADFV01192049.1-trdv:0.0334137
,
(
V222RF-ABGA01321072.1-trdv:0.0129971
,
(
V26RF-CABD02105626.1-trdv:0.00513877
,
V58RF-AACZ03095317.1-trdv:0.00513877
):0.0078583
):0.0204166
):0.013064
,
(
V77RF-AGCE01026520.1-trdv:0.0439496
,
(
(
(
V120RF-JYKQ01135388.1-trav:0.0129163
,
(
V153RF-AQIA01064166.1-trav:0.00513877
,
V2RF-AHZZ01035404.1-trav:0.00513877
):0.00777758
):0.0156032
,
(
V92RF-ADFV01192049.1-trav:0.019668
,
(
V173RF-JABR01098590.1-trav:0.018326
,
(
V59RF-AACZ03095317.1-trav:0.0051257
,
(
(
V112RF-AJFE01024276.1-trav:-0
,
V221RF-ABGA01321070.1-trav:-0
):0
,
V27RF-CABD02105626.1-trav:-0
):0.0051257
):0.0132003
):0.00134202
):0.00885148
):0.0100331
,
(
V174RF-JABR01098592.1-trdv:0.0405631
,
(
V201RF-AQIB01128637.1-trav:0.0320527
,
(
V200RF-AQIB01128637.1-trdv:0.0264995
,
(
V152RF-AQIA01064166.1-trdv:0.0210101
,
(
V1RF-AHZZ01035404.1-trdv:0.0103522
,
V119RF-JYKQ01135385.1-trdv:0.0103522
):0.0106579
):0.00548942
):0.00555319
):0.00851041
):-0.00201043
):0.00539698
):0.00252809
):0.0174665
):0.0191954
):0.166132
,
(
(
(
V192RF-JABR01098600.1-trav:0.0326908
,
(
V219RF-AQIB01128644.1-trav:0.0224328
,
(
V67RF-JYKQ01054942.1-trav:0.0129971
,
(
V137RF-AQIA01064146.1-trav:0.00513877
,
V56RF-AHZZ01107545.1-trav:0.00513877
):0.0078583
):0.00943574
):0.010258
):0.0195902
,
(
V74RF-ADFV01192039.1-trav:0.0379086
,
(
V123RF-ABGA01387831.1-trav:0.0331008
,
(
V12RF-CABD02105589.1-trav:0.0181361
,
(
(
V65RF-AJFE01069976.1-trav:-0
,
V194RF-AACZ03171512.1-trav:-0
):0.0154805
,
V74RF-AACZ03097618.1-trav:0.0154805
):0.00265555
):0.0149648
):0.00480772
):0.0143724
):0.0814509
,
(
V62RF-JZKE01143915.1-trdv:0.0992023
,
(
V59RF-JZKE01143910.1-trav:0.0558541
,
(
(
V49RF-JZKE01143895.1-trav:0.0428411
,
V48RF-ABDC01379531.1-trav:0.0428411
):0.00572393
,
V53RF-JZKE01143896.1-trav:0.048565
):0.00728906
):0.0433483
):0.0345296
):0.11554
):0.0601681
):0.0547189
):0.433756
):0.13844
):-0.0268028
):2.09555
,
(
(
(
(
(
(
V146RF-ABGA01113129.1-trav:0.0247799
,
(
(
(
V54RF-AJFE01069975.1-trav:-0
,
V65RF-AACZ03097613.1-trav:-0
):0
,
V160RF-AACZ03171395.1-trav:-0
):0.0163229
,
(
V4RF-CABD02105575.1-trav:0.0107994
,
V63RF-ADFV01192035.1-trav:0.0107994
):0.0055235
):0.00845706
):0.13185
,
(
V66RF-JZKE01143916.1-trav:0.0575071
,
V46RF-ABDC01377655.1-trav:0.0575071
):0.0991229
):0.204249
,
(
(
V47RF-JZKE01143893.1-trav:0.0513366
,
V99RF-ABDC01533414.1-trav:0.0513366
):0.112109
,
(
V84RF-AGCE01026527.1-trav:0.126061
,
(
V77RF-ADFV01192039.1-trav:0.0548376
,
(
(
(
V68RF-AJFE01069976.1-trav:-0
,
V77RF-AACZ03097619.1-trav:-0
):0.00535908
,
(
V118RF-ABGA01386446.1-trav:-0
,
V15RF-CABD02105596.1-trav:-0
):0.00535908
):0.0284662
,
(
V184RF-JABR01098598.1-trav:0.0283851
,
(
V222RF-AQIB01128644.1-trav:0.014942
,
(
V140RF-AQIA01064148.1-trav:0.0135611
,
(
V31RF-AHZZ01098200.1-trav:0.00535908
,
V70RF-JYKQ01054953.1-trav:0.00535908
):0.00820203
):0.00138088
):0.0134431
):0.00544023
):0.0210123
):0.0712235
):0.0373846
):0.197434
):0.245458
,
(
(
(
(
V83RF-AJFE01010527.1-trav:0.010684
,
V21RF-CABD02105612.1-trav:0.010684
):0
,
V82RF-AACZ03097622.1-trav:0.010684
):0.420221
,
(
(
V34RF-JZKE01143869.1-trav:0.0452661
,
V101RF-ABDC01542818.1-trav:0.0452661
):0.0884922
,
(
(
V202RF-AHZZ01093946.1-trav:0.0217366
,
(
V151RF-AQIA01064166.1-trav:0.010684
,
V162RF-JYKQ01026643.1-trav:0.010684
):0.0110526
):0.0400298
,
(
V176RF-JABR01098593.1-trav:0.047081
,
(
V90RF-ADFV01192045.1-trav:0.0404644
,
(
V223RF-ABGA01321081.1-trav:0.0361695
,
(
(
V111RF-AJFE01024276.1-trav:-0
,
V57RF-AACZ03095314.1-trav:-0
):0.00535908
,
V193RF-AACZ03171149.1-trav:0.00535908
):0.0308105
):0.00429489
):0.00661652
):0.0146855
):0.0719919
):0.297147
):0.0792971
,
(
(
V94RF-JABR01039937.1-trav:0.0405618
,
(
(
(
V154RF-AQIA01064166.1-trav:-0
,
V121RF-JYKQ01135389.1-trav:-0
):0.00535908
,
V3RF-AHZZ01035404.1-trav:0.00535908
):0.0288418
,
(
V93RF-ADFV01192050.1-trav:0.0262484
,
(
(
V113RF-AJFE01024276.1-trav:0.00535908
,
V60RF-AACZ03095319.1-trav:0.00535908
):0.0138114
,
(
V220RF-ABGA01321068.1-trav:0.0107994
,
V28RF-CABD02105628.1-trav:0.0107994
):0.00837116
):0.00707786
):0.00795255
):0.00636091
):0.474327
,
(
(
V199RF-JABR01098604.1-trav:0.046808
,
(
V64RF-ADFV01192035.1-trav:0.0247799
,
(
V55RF-AJFE01069975.1-trav:0.00535908
,
V66RF-AACZ03097613.1-trav:0.00535908
):0.0194208
):0.0220281
):0.409719
,
(
V57RF-JZKE01143910.1-trav:0.110641
,
(
V66RF-ADFV01192037.1-trav:0.0316844
,
(
V201RF-JABR01098604.1-trav:0.0243306
,
(
(
V129RF-AQIA01064138.1-trav:-0
,
V79RF-AHZZ01198214.1-trav:-0
):0.0159752
,
V214RF-AQIB01128644.1-trav:0.0159752
):0.00835547
):0.00735377
):0.0789566
):0.345886
):0.0583622
):-0.00468683
):0.0961356
):0.0711425
,
(
(
(
V61RF-JYKQ01054940.1-trav:0.00758872
,
(
(
V130RF-AQIA01064144.1-trav:-0
,
V195RF-JABR01098603.1-trav:-0
):0.00503527
,
V80RF-AHZZ01198216.1-trav:0.00503527
):0.00255345
):0.0236957
,
(
V67RF-ADFV01192037.1-trav:0.0177464
,
(
V144RF-ABGA01083939.1-trav:0.0135611
,
(
(
V59RF-AJFE01069975.1-trav:-0
,
V69RF-AACZ03097613.1-trav:-0
):0.00535908
,
V7RF-CABD02105584.1-trav:0.00535908
):0.00820203
):0.0041853
):0.013538
):0.56873
,
(
V61RF-JZKE01143915.1-trav:0.169145
,
(
(
(
V191RF-JABR01098600.1-trav:0.0228743
,
(
V136RF-AQIA01064146.1-trav:0.0132731
,
(
(
V218RF-AQIB01128644.1-trav:-0
,
V55RF-AHZZ01107544.1-trav:-0
):0.00524662
,
V66RF-JYKQ01054942.1-trav:0.00524662
):0.00802648
):0.00960124
):0.0388175
,
(
V138RF-ABGA01083932.1-trav:0.034122
,
(
V73RF-ADFV01192038.1-trav:0.0242458
,
(
V64RF-AJFE01069976.1-trav:0.00524662
,
V11RF-CABD02105589.1-trav:0.00524662
):0.0189992
):0.00987621
):0.0275698
):0.0885786
,
(
V58RF-JZKE01143910.1-trav:0.0878514
,
V77RF-ABDC01440241.1-trav:0.0878514
):0.062419
):0.0188742
):0.430869
):0.0774663
):1.20243
,
(
V95RF-AGCE01026534.1-trav:0.808378
,
(
(
(
(
V89RF-AGCE01026530.1-trav:0.101225
,
(
(
V61RF-AJFE01069975.1-trav:0.00530225
,
V71RF-AACZ03097614.1-trav:0.00530225
):0.0413828
,
(
V140RF-ABGA01083937.1-trav:0.0309122
,
(
V194RF-JABR01098601.1-trav:0.0175338
,
(
(
V132RF-AQIA01064146.1-trav:0.010684
,
V52RF-AHZZ01107544.1-trav:0.010684
):0.00546317
,
V63RF-JYKQ01054942.1-trav:0.0161471
):0.00138667
):0.0133783
):0.0157729
):0.0545399
):0.0939189
,
(
V71RF-ABDC01418428.1-trav:0.130205
,
(
V48RF-JZKE01143895.1-trav:0.0945053
,
V52RF-JZKE01143896.1-trav:0.0945053
):0.0356997
):0.0649389
):0.0988673
,
(
(
V65RF-JZKE01143916.1-trav:0.0693477
,
V45RF-ABDC01377653.1-trav:0.0693477
):0.146899
,
(
V94RF-AGCE01026534.1-trav:0.11605
,
(
(
V3RF-CABD02105570.1-trav:0.0323647
,
(
V147RF-ABGA01113130.1-trav:0.025918
,
(
(
V53RF-AJFE01069975.1-trav:0.00530225
,
V64RF-AACZ03097612.1-trav:0.00530225
):0.0108449
,
V62RF-ADFV01192035.1-trav:0.0161471
):0.00977088
):0.0064467
):0.0151021
,
(
(
V77RF-AHZZ01198213.1-trav:0.00530225
,
V58RF-JYKQ01054933.1-trav:0.00530225
):0.0220458
,
(
V211RF-AQIB01128644.1-trav:0.0161889
,
(
V126RF-AQIA01064137.1-trav:0.010684
,
V197RF-JABR01098604.1-trav:0.010684
):0.00550491
):0.0111592
):0.0201187
):0.0685828
):0.100197
):0.0777643
):0.252112
,
(
(
(
V51RF-ABDC01388284.1-trav:0.130772
,
(
(
V49RF-ABDC01379531.1-trav:-0
,
V90RF-ABDC01491653.1-trav:-0
):0.0791211
,
(
V50RF-JZKE01143895.1-trav:0.0359514
,
(
V54RF-JZKE01143896.1-trav:0.0161471
,
V55RF-JZKE01143902.1-trav:0.0161471
):0.0198042
):0.0431697
):0.0516505
):0.066556
,
(
(
V87RF-AGCE01026529.1-trav:0.0862444
,
(
(
V187RF-JABR01098599.1-trav:0.0207753
,
(
V30RF-AHZZ01098200.1-trav:0.0200895
,
(
V69RF-JYKQ01054942.1-trav:0.00790882
,
(
(
V139RF-AQIA01064146.1-trav:-0
,
V221RF-AQIB01128644.1-trav:-0
):0.00524662
,
V215RF-AQIB01128644.1-trav:0.00524662
):0.00266221
):0.0121807
):0.000685729
):0.0325806
,
(
V125RF-ABGA01387833.1-trav:0.0457456
,
(
V76RF-ADFV01192039.1-trav:0.0298583
,
(
V67RF-AJFE01069976.1-trav:0.0159752
,
(
V14RF-CABD02105592.1-trav:0.010571
,
V76RF-AACZ03097619.1-trav:0.010571
):0.00540413
):0.0138832
):0.0158872
):0.00761033
):0.0328885
):0.0866775
,
(
V92RF-AGCE01026531.1-trav:0.151901
,
(
(
V71RF-ADFV01192038.1-trav:0.0316832
,
(
V72RF-AACZ03097614.1-trav:0.0134156
,
(
V62RF-AJFE01069975.1-trav:0.00530225
,
V10RF-CABD02105588.1-trav:0.00530225
):0.00811331
):0.0182677
):0.0455301
,
(
V90RF-AGCE01026530.1-trav:0.0615193
,
(
V188RF-JABR01098600.1-trav:0.0378469
,
(
V64RF-JYKQ01054942.1-trav:0.0191273
,
(
V133RF-AQIA01064146.1-trav:0.0163229
,
V53RF-AHZZ01107544.1-trav:0.0163229
):0.00280443
):0.0187196
):0.0236724
):0.015694
):0.0746874
):0.0210213
):0.0244057
):0.364386
,
(
V198RF-AQIB01128636.1-trav:0.456979
,
(
(
V81RF-AGCE01026522.1-trav:0.0467696
,
(
V228RF-ABGA01358461.1-trav:0.0429709
,
(
V183RF-JABR01098597.1-trav:0.025566
,
(
(
V144RF-AQIA01064151.1-trav:0.0103522
,
V207RF-AQIB01128642.1-trav:0.0103522
):0.0127565
,
(
V18RF-CABD02105602.1-trav:0.0170036
,
(
V81RF-ADFV01192040.1-trav:0.00774547
,
(
V71RF-AJFE01069977.1-trav:0.00513877
,
V80RF-AACZ03097619.1-trav:0.00513877
):0.0026067
):0.0092581
):0.00610514
):0.00245729
):0.0174049
):0.00379861
):0.370076
,
(
V80RF-AGCE01026522.1-trav:0.0499281
,
(
V80RF-ADFV01192040.1-trav:0.0350796
,
(
V182RF-JABR01098597.1-trav:0.0251698
,
(
V43RF-JABR01080842.1-trav:0.0255032
,
(
V73RF-JYKQ01054957.1-trav:0.0233777
,
(
(
(
V70RF-AJFE01069977.1-trav:-0
,
V17RF-CABD02105602.1-trav:-0
):0.00535908
,
V79RF-AACZ03097619.1-trav:0.00535908
):0.0137682
,
(
(
V143RF-AQIA01064151.1-trav:-0
,
V206RF-AQIB01128642.1-trav:-0
):0.00535908
,
V34RF-AHZZ01098200.1-trav:0.00535908
):0.0137682
):0.00425042
):0.0021255
):-0.000333417
):0.00990983
):0.0148484
):0.366918
):0.0401328
):0.104735
):-0.0155896
):0.262254
):1.20243
):0.893128
):-0.0558627
):1.40976
,
(
(
V80RF-JABR01196792.1-trbv:0.111567
,
(
(
(
V77RF-AJFE01104369.1-trbv:-0
,
V54RF-AACZ03067007.1-trbv:-0
):0.0261813
,
V112RF-CABD02377030.1-trbv:0.0261813
):0.0192443
,
(
(
V118RF-JYKQ01131111.1-trbv:0.0235659
,
(
(
V121RF-AQIA01048536.1-trbv:-0
,
V196RF-AQIB01162321.1-trbv:-0
):0.0154805
,
V123RF-AHZZ01067647.1-trbv:0.0154805
):0.0080854
):0.0244356
,
(
V32RF-ADFV01062085.1-trbv:0.0303044
,
(
V46RF-ABGA01091263.1-trbv:0.0234864
,
(
V124RF-AJFE01070459.1-trbv:0.00508649
,
V50RF-AACZ03053995.1-trbv:0.00508649
):0.0183999
):0.006818
):0.0176971
):-0.00257597
):0.0661418
):3.15434
,
(
(
V73RF-AJFE01070458.1-trbv:0.957654
,
(
(
V226RF-ABGA01349559.1-trbv:0.0330913
,
(
(
V76RF-AJFE01104359.1-trbv:-0
,
V53RF-AACZ03067000.1-trbv:-0
):0.0161471
,
V111RF-CABD02377005.1-trbv:0.0161471
):0.0169442
):0.0929744
,
(
(
V45RF-ABGA01091260.1-trbv:0.0151385
,
(
V29RF-ADFV01062082.1-trbv:0.00914337
,
(
V47RF-AACZ03053992.1-trbv:0.00782629
,
(
V121RF-AJFE01070459.1-trbv:0.00519213
,
V106RF-CABD02352529.1-trbv:0.00519213
):0.00263416
):0.00131708
):0.00599515
):0.0364491
,
(
V115RF-JYKQ01131107.1-trbv:0.0233192
,
(
V118RF-AQIA01048536.1-trbv:0.0198766
,
(
V124RF-AHZZ01067648.1-trbv:0.00782629
,
(
V193RF-AQIB01162321.1-trbv:0.00519213
,
V67RF-JABR01092448.1-trbv:0.00519213
):0.00263416
):0.0120503
):0.00344268
):0.0282684
):0.074478
):0.831588
):2.87171
,
(
(
(
V29RF-AGCE01062014.1-trbv:0.376657
,
(
(
(
V167RF-JABR01088216.1-trbv:0.0452436
,
(
V155RF-AQIB01162312.1-trbv:0.0239873
,
(
V78RF-AQIA01048526.1-trbv:0.0158068
,
(
V171RF-AHZZ01067656.1-trbv:0.0104605
,
V30RF-JYKQ01029809.1-trbv:0.0104605
):0.00534636
):0.00818047
):0.0212563
):0.059917
,
(
(
(
V166RF-AHZZ01067655.1-trbv:-0
,
V33RF-JYKQ01029809.1-trbv:-0
):0.0438246
,
(
V81RF-AQIA01048526.1-trbv:0.0104605
,
V165RF-AHZZ01067655.1-trbv:0.0104605
):0.0333641
):0.0451675
,
(
(
V203RF-ABGA01277809.1-trbv:0.0359514
,
(
(
V157RF-AJFE01070464.1-trbv:-0
,
V12RF-AACZ03053977.1-trbv:-0
):0.0158068
,
V70RF-CABD02352488.1-trbv:0.0158068
):0.0201446
):0.0384306
,
(
(
V73RF-CABD02352493.1-trbv:0.035173
,
(
V159RF-AJFE01070465.1-trbv:0.00519213
,
V9RF-AACZ03053976.1-trbv:0.00519213
):0.0299809
):0.0364182
,
(
V205RF-ABGA01277810.1-trbv:0.0728266
,
(
V8RF-ADFV01062071.1-trbv:0.0728836
,
(
V170RF-JABR01088216.1-trbv:0.0718484
,
(
V207RF-ABGA01277815.1-trbv:0.0586863
,
(
V204RF-ABGA01277810.1-trbv:0.0541852
,
(
V11RF-ADFV01062071.1-trbv:0.0514095
,
(
V7RF-ADFV01062069.1-trbv:0.0325062
,
(
(
V35RF-AJFE01039608.1-trbv:-0
,
V7RF-AACZ03053974.1-trbv:-0
):0.0212331
,
V69RF-CABD02352482.1-trbv:0.0212331
):0.011273
):0.0189033
):0.00277571
):0.00450115
):0.013162
):0.00103519
):-5.69746e-05
):-0.0012354
):0.00279081
):0.0146101
):0.0161686
):0.0495215
,
(
V13RF-AGCE01062002.1-trbv:0.137666
,
(
(
V97RF-ABGA01301083.1-trbv:0.0477583
,
(
V142RF-AJFE01070463.1-trbv:0.00519213
,
V24RF-AACZ03053983.1-trbv:0.00519213
):0.0425661
):0.0592094
,
(
(
V92RF-JYKQ01131092.1-trbv:0.0481725
,
(
V170RF-AQIB01162318.1-trbv:0.046708
,
(
V94RF-AQIA01048530.1-trbv:0.0267414
,
V153RF-AHZZ01067652.1-trbv:0.0267414
):0.0199666
):0.00146443
):0.0550276
,
(
(
V0RF-AGCE01061995.1-trbv:0.0437792
,
V4RF-AGCE01061995.1-trbv:0.0437792
):0.0694801
,
(
(
V153RF-JABR01088214.1-trbv:0.0470683
,
(
V178RF-AQIB01162320.1-trbv:0.0316832
,
(
V102RF-AQIA01048532.1-trbv:0.0302752
,
(
V144RF-AHZZ01067651.1-trbv:0.0161471
,
V100RF-JYKQ01131096.1-trbv:0.0161471
):0.014128
):0.00140807
):0.0153851
):0.0398517
,
(
(
V98RF-JYKQ01131094.1-trbv:0.0212331
,
V151RF-JABR01088214.1-trbv:0.0212331
):0.0471104
,
(
(
V140RF-AHZZ01067651.1-trbv:-0
,
V95RF-JYKQ01131093.1-trbv:-0
):0.0816473
,
(
(
V166RF-AQIB01162317.1-trbv:0.0309998
,
(
V90RF-AQIA01048530.1-trbv:0.01852
,
(
V147RF-AHZZ01067652.1-trbv:0.00519213
,
V85RF-JYKQ01131090.1-trbv:0.00519213
):0.0133278
):0.0124798
):0.042189
,
(
V98RF-AQIA01048530.1-trbv:0.0740258
,
(
(
V150RF-AJFE01070463.1-trbv:-0
,
V30RF-AACZ03053988.1-trbv:-0
):0.076487
,
(
(
V88RF-CABD02352510.1-trbv:0.0245967
,
(
V147RF-AJFE01070463.1-trbv:0.0159752
,
V27RF-AACZ03053987.1-trbv:0.0159752
):0.00862152
):0.0481195
,
(
V99RF-ABGA01301086.1-trbv:0.0544896
,
(
V160RF-ABGA01223433.1-trbv:0.040197
,
(
V160RF-JABR01088215.1-trbv:0.0282031
,
(
V81RF-CABD02352501.1-trbv:0.01852
,
(
V139RF-AJFE01070463.1-trbv:0.0158068
,
V21RF-AACZ03053983.1-trbv:0.0158068
):0.00271316
):0.00968309
):0.0119939
):0.0142927
):0.0182266
):0.00377081
):-0.00246122
):-0.000837006
):0.00845849
):-0.0133038
):0.0185765
):0.0263393
):-0.0100591
):0.00376756
):0.0306982
):0.0170163
):0.221975
):0.922887
,
(
V179RF-AACZ03054006.1-trbv:0.882022
,
(
(
(
(
V44RF-ABGA01091257.1-trbv:0.01852
,
(
(
V120RF-AJFE01070459.1-trbv:-0
,
V46RF-AACZ03053992.1-trbv:-0
):0.00519213
,
V105RF-CABD02352529.1-trbv:0.00519213
):0.0133278
):0.01918
,
(
V137RF-AHZZ01067649.1-trbv:0.0316883
,
(
V192RF-AQIB01162321.1-trbv:0.0253644
,
(
V66RF-JABR01092448.1-trbv:0.01852
,
(
V117RF-AQIA01048536.1-trbv:0.00519213
,
V114RF-JYKQ01131107.1-trbv:0.00519213
):0.0133278
):0.00684438
):0.00632395
):0.00601164
):0.30452
,
(
(
V158RF-AQIB01162312.1-trbv:0.190517
,
V119RF-ABDC01368601.1-trbv:0.190517
):0.0804337
,
(
(
V199RF-ABGA01277806.1-trbv:0.0323768
,
(
(
V158RF-AJFE01070464.1-trbv:-0
,
V14RF-AACZ03053981.1-trbv:-0
):0.0104605
,
V75RF-CABD02352498.1-trbv:0.0104605
):0.0219164
):0.235396
,
(
(
V69RF-JZKE01196378.1-trbv:0.0912649
,
V101RF-JZKE01294668.1-trbv:0.0912649
):0.0813203
,
(
V128RF-ABDC01455982.1-trbv:0.173806
,
(
(
V11RF-AGCE01062000.1-trbv:0.107974
,
(
(
V161RF-AHZZ01067653.1-trbv:0.0104605
,
V83RF-JYKQ01131090.1-trbv:0.0104605
):0.0874701
,
(
V9RF-AGCE01061998.1-trbv:0.0804551
,
(
V14RF-ADFV01062075.1-trbv:0.0380565
,
(
V86RF-AQIA01048529.1-trbv:0.0158068
,
V163RF-AQIB01162314.1-trbv:0.0158068
):0.0222497
):0.0423986
):0.0174754
):0.0100434
):0.0325734
,
(
V19RF-AGCE01062009.1-trbv:0.100167
,
(
(
V146RF-JABR01088213.1-trbv:0.0171634
,
(
V181RF-AQIB01162320.1-trbv:0.01852
,
(
(
V106RF-AQIA01048532.1-trbv:0.0104605
,
V126RF-AHZZ01067649.1-trbv:0.0104605
):0
,
V104RF-JYKQ01131101.1-trbv:0.0104605
):0.00805952
):-0.00135658
):0.0317659
,
(
V32RF-ABGA01091248.1-trbv:0.0423375
,
(
V20RF-ADFV01062075.1-trbv:0.035173
,
(
V94RF-CABD02352513.1-trbv:0.0158068
,
V35RF-AACZ03053988.1-trbv:0.0158068
):0.0193662
):0.00716446
):0.00659183
):0.051238
):0.04038
):0.0332585
):-0.00122067
):0.0951873
):0.00317848
):0.0712686
):0.0332761
,
(
(
(
V41RF-ABGA01091252.1-trbv:0.0131336
,
(
(
V126RF-AJFE01070460.1-trbv:-0
,
V102RF-CABD02352526.1-trbv:-0
):0.00519213
,
V43RF-AACZ03053991.1-trbv:0.00519213
):0.0079415
):0.02347
,
(
(
V114RF-AQIA01048536.1-trbv:0.0212331
,
V134RF-AHZZ01067649.1-trbv:0.0212331
):0.00550829
,
(
V189RF-AQIB01162321.1-trbv:0.0212331
,
V111RF-JYKQ01131104.1-trbv:0.0212331
):0.00550829
):0.00986226
):0.340596
,
(
(
(
(
V69RF-JABR01092448.1-trbv:0.0266254
,
(
V195RF-AQIB01162321.1-trbv:0.0140273
,
(
V117RF-JYKQ01131110.1-trbv:0.00758872
,
(
V120RF-AQIA01048536.1-trbv:0.00503527
,
V122RF-AHZZ01067647.1-trbv:0.00503527
):0.00255345
):0.00643862
):0.0125981
):0.0252492
,
(
(
V77RF-ABGA01224584.1-trbv:0.00519213
,
V162RF-ABGA01225869.1-trbv:0.00519213
):0.0244098
,
(
V31RF-ADFV01062084.1-trbv:0.0212741
,
(
(
V123RF-AJFE01070459.1-trbv:0.0104605
,
V108RF-CABD02352532.1-trbv:0.0104605
):0
,
V49RF-AACZ03053994.1-trbv:0.0104605
):0.0108137
):0.00832785
):0.0222726
):0.112289
,
(
V0RF-JZKE01005121.1-trbv:0.0945053
,
V2RF-ABDC01116809.1-trbv:0.0945053
):0.0696585
):0.15718
,
(
V99RF-JZKE01294660.1-trbv:0.191761
,
(
V28RF-AGCE01062014.1-trbv:0.0462336
,
(
(
V161RF-ABGA01225869.1-trbv:0.0212331
,
(
V48RF-AACZ03053994.1-trbv:0.0212741
,
(
V107RF-CABD02352531.1-trbv:0.0104605
,
V30RF-ADFV01062084.1-trbv:0.0104605
):0.0108137
):-4.09801e-05
):0.0187961
,
(
V68RF-JABR01092448.1-trbv:0.0366034
,
(
V116RF-JYKQ01131110.1-trbv:0.0282031
,
(
V121RF-AHZZ01067647.1-trbv:0.0239873
,
(
V119RF-AQIA01048536.1-trbv:0.0212331
,
V194RF-AQIB01162321.1-trbv:0.0212331
):0.00275414
):0.00421579
):0.00840033
):0.00342586
):0.00620437
):0.145528
):0.129582
):0.0558562
):-0.00170416
):0.506526
):0.922887
):1.57867
,
(
(
(
(
(
V149RF-AQIB01162311.1-trbv:0.0542545
,
(
(
V72RF-JABR01095741.1-trbv:0.0267414
,
V75RF-JABR01095742.1-trbv:0.0267414
):0.0115075
,
(
V237RF-AHZZ01107346.1-trbv:0.0343462
,
(
V70RF-AQIA01048525.1-trbv:0.0104605
,
V23RF-JYKQ01029805.1-trbv:0.0104605
):0.0238857
):0.00390275
):0.0160055
):0.021087
,
(
(
V4RF-ADFV01062069.1-trbv:0.0791203
,
(
V168RF-JABR01088216.1-trbv:0.0598852
,
(
V31RF-JYKQ01029809.1-trbv:0.0348076
,
(
V156RF-AQIB01162312.1-trbv:0.0281083
,
(
V79RF-AQIA01048526.1-trbv:0.0150156
,
V163RF-AHZZ01067655.1-trbv:0.0150156
):0.0130927
):0.00669932
):0.0250776
):0.0192351
):-0.0148852
,
(
(
V1RF-AGCE01061995.1-trbv:0.0453804
,
(
V152RF-AQIB01162312.1-trbv:0.0296227
,
(
V75RF-AQIA01048525.1-trbv:0.0158068
,
V169RF-AHZZ01067656.1-trbv:0.0158068
):0.0138159
):0.0157577
):0.00919668
,
(
V9RF-ADFV01062071.1-trbv:0.0408957
,
(
(
(
V155RF-AJFE01070464.1-trbv:-0
,
V71RF-CABD02352491.1-trbv:-0
):0
,
V10RF-AACZ03053977.1-trbv:-0
):0.0323337
,
V201RF-ABGA01277809.1-trbv:0.0323337
):0.00856198
):0.0136814
):0.00965799
):0.0111064
):0.0652134
,
(
(
(
V98RF-ABDC01527872.1-trbv:0.0323337
,
V112RF-ABDC01281097.1-trbv:0.0323337
):0.02491
,
(
V61RF-ABDC01399103.1-trbv:0.0380123
,
V109RF-ABDC01281094.1-trbv:0.0380123
):0.0192315
):0.0304649
,
(
V110RF-JZKE01294690.1-trbv:0.0740255
,
V112RF-JZKE01294699.1-trbv:0.0740255
):0.0136831
):0.0528463
):0.226714
,
(
V107RF-ABDC01281089.1-trbv:0.193218
,
(
V2RF-AGCE01061995.1-trbv:0.112464
,
(
V10RF-ADFV01062071.1-trbv:0.0436842
,
(
(
V36RF-AJFE01039609.1-trbv:-0
,
V8RF-AACZ03053975.1-trbv:-0
):0.0288587
,
(
(
V156RF-AJFE01070464.1-trbv:-0
,
V11RF-AACZ03053977.1-trbv:-0
):0.00519213
,
V72RF-CABD02352492.1-trbv:0.00519213
):0.0236666
):0.0148255
):0.0687794
):0.0807539
):0.174052
):2.11645
,
(
(
(
V64RF-ABDC01405197.1-trbv:0.157201
,
(
V25RF-ADFV01062079.1-trbv:0.0281605
,
(
V40RF-AACZ03053991.1-trbv:0.0239873
,
(
V38RF-ABGA01091249.1-trbv:0.0158068
,
V100RF-CABD02352520.1-trbv:0.0158068
):0.00818047
):0.00417323
):0.129041
):0.535421
,
(
(
(
V111RF-JZKE01294692.1-trbv:0.0677794
,
V110RF-ABDC01281096.1-trbv:0.0677794
):0.0712335
,
(
(
(
V73RF-JABR01095741.1-trbv:0.0438246
,
(
V71RF-AQIA01048525.1-trbv:0.0380565
,
(
V235RF-AHZZ01107345.1-trbv:0.0212331
,
V24RF-JYKQ01029805.1-trbv:0.0212331
):0.0168233
):0.00576811
):0.015723
,
(
(
V76RF-AQIA01048525.1-trbv:0.0171634
,
(
(
V150RF-AQIB01162312.1-trbv:-0
,
V28RF-JYKQ01029807.1-trbv:-0
):0.0131336
,
(
V153RF-AQIB01162312.1-trbv:0.00519213
,
V170RF-AHZZ01067656.1-trbv:0.00519213
):0.0079415
):0.00402976
):0.03827
,
(
V215RF-ABGA01277831.1-trbv:0.0405887
,
(
V5RF-ADFV01062069.1-trbv:0.0261173
,
(
V1RF-ADFV01062069.1-trbv:0.0215761
,
(
V210RF-ABGA01277827.1-trbv:0.0229894
,
(
V5RF-AACZ03053974.1-trbv:0.0153116
,
(
V33RF-AJFE01039607.1-trbv:0.0104605
,
V67RF-CABD02352480.1-trbv:0.0104605
):0.00485115
):0.00767784
):-0.00141335
):0.00454123
):0.0144714
):0.0148447
):0.00411423
):0.0646815
,
(
V206RF-ABGA01277811.1-trbv:0.0638501
,
(
(
V80RF-AQIA01048526.1-trbv:0.0104605
,
V157RF-AQIB01162312.1-trbv:0.0104605
):0.0219595
,
(
V164RF-AHZZ01067655.1-trbv:0.0104605
,
V32RF-JYKQ01029809.1-trbv:0.0104605
):0.0219595
):0.0314302
):0.060379
):0.0147839
):0.620457
,
(
V18RF-ADFV01062075.1-trbv:0.482783
,
(
(
V39RF-AACZ03053991.1-trbv:0.0156811
,
(
V130RF-AJFE01070461.1-trbv:0.0103522
,
V99RF-CABD02352520.1-trbv:0.0103522
):0.00532895
):0.510663
,
(
(
V24RF-AGCE01062011.1-trbv:0.0740775
,
(
(
V125RF-AJFE01070460.1-trbv:-0
,
V42RF-AACZ03053991.1-trbv:-0
):0.0104605
,
V101RF-CABD02352525.1-trbv:0.0104605
):0.0636171
):0.368007
,
(
(
V136RF-ABDC01560090.1-trbv:0.148736
,
(
V26RF-AGCE01062012.1-trbv:0.105078
,
(
(
(
V74RF-AJFE01104359.1-trbv:-0
,
V51RF-AACZ03066999.1-trbv:-0
):0.0103522
,
V109RF-CABD02377004.1-trbv:0.0103522
):0.0550761
,
(
(
V64RF-JABR01092448.1-trbv:0.027841
,
(
V115RF-AQIA01048536.1-trbv:0.0210101
,
(
(
V190RF-AQIB01162321.1-trbv:0.0103522
,
V135RF-AHZZ01067649.1-trbv:0.0103522
):0.00528981
,
V112RF-JYKQ01131104.1-trbv:0.015642
):0.00536809
):0.00683094
):0.0174082
,
(
V27RF-ADFV01062081.1-trbv:0.0292236
,
(
(
V127RF-AJFE01070460.1-trbv:0.0103522
,
V44RF-AACZ03053992.1-trbv:0.0103522
):0.00528981
,
V103RF-CABD02352526.1-trbv:0.015642
):0.0135817
):0.0160255
):0.0201791
):0.0396493
):0.0436587
):0.211364
,
(
(
V103RF-JZKE01294668.1-trbv:0.196068
,
(
V62RF-JABR01092448.1-trbv:0.0484277
,
(
(
V188RF-AQIB01162320.1-trbv:0.018326
,
(
V133RF-AHZZ01067649.1-trbv:0.00513877
,
V109RF-JYKQ01131102.1-trbv:0.00513877
):0.0131872
):0.0207031
,
(
V39RF-ABGA01091249.1-trbv:0.0319889
,
V26RF-ADFV01062079.1-trbv:0.0319889
):0.00704017
):0.00939862
):0.147641
):0.126298
,
(
V131RF-ABDC01473376.1-trbv:0.247674
,
(
(
V134RF-ABGA01047585.1-trbv:0.0264584
,
V110RF-CABD02377004.1-trbv:0.0264584
):0.0433895
,
(
(
V65RF-JABR01092448.1-trbv:0.0265195
,
(
(
V136RF-AHZZ01067649.1-trbv:0.0101422
,
V113RF-JYKQ01131105.1-trbv:0.0101422
):0.00532276
,
(
V116RF-AQIA01048536.1-trbv:0.0103522
,
V191RF-AQIB01162321.1-trbv:0.0103522
):0.00511276
):0.0110546
):0.0300672
,
(
V43RF-ABGA01091257.1-trbv:0.0223721
,
(
V104RF-CABD02352526.1-trbv:0.0129971
,
(
V128RF-AJFE01070460.1-trbv:0.00513877
,
V45RF-AACZ03053992.1-trbv:0.00513877
):0.0078583
):0.00937507
):0.0342146
):0.0132611
):0.177826
):0.0746927
):0.037734
):0.0819839
):0.0842598
):-0.0435611
):0.276687
):-0.0668476
):1.74772
,
(
(
(
V131RF-AJFE01070461.1-trbv:-0
,
V41RF-AACZ03053991.1-trbv:-0
):0.576841
,
(
(
V107RF-JZKE01294669.1-trbv:0.118594
,
(
V18RF-AGCE01062008.1-trbv:0.0587334
,
(
V19RF-ADFV01062075.1-trbv:0.0323768
,
(
(
V154RF-AJFE01070463.1-trbv:-0
,
V34RF-AACZ03053988.1-trbv:-0
):0.0104605
,
V93RF-CABD02352512.1-trbv:0.0104605
):0.0219164
):0.0263566
):0.0598605
):0.155837
,
(
(
(
V85RF-AQIA01048528.1-trbv:0.026889
,
(
V37RF-JYKQ01029811.1-trbv:0.015977
,
(
(
V162RF-AQIB01162313.1-trbv:0.00519213
,
V155RF-JABR01088215.1-trbv:0.00519213
):0.00549184
,
V158RF-AHZZ01067653.1-trbv:0.010684
):0.005293
):0.010912
):0.0130995
,
(
V13RF-ADFV01062075.1-trbv:0.0288215
,
(
V17RF-AACZ03053981.1-trbv:0.01852
,
(
V197RF-ABGA01277802.1-trbv:0.0158068
,
V78RF-CABD02352499.1-trbv:0.0158068
):0.00271316
):0.0103015
):0.0111671
):0.224693
,
(
(
V3RF-AGCE01061995.1-trbv:0.120926
,
(
V208RF-ABGA01277825.1-trbv:0.0529011
,
(
(
V77RF-AQIA01048525.1-trbv:0.0273261
,
V154RF-AQIB01162312.1-trbv:0.0273261
):0.0120578
,
(
V29RF-JYKQ01029807.1-trbv:0.0388796
,
(
V6RF-ADFV01062069.1-trbv:0.0295376
,
(
(
V34RF-AJFE01039607.1-trbv:-0
,
V6RF-AACZ03053974.1-trbv:-0
):0.0158068
,
V68RF-CABD02352480.1-trbv:0.0158068
):0.0137308
):0.00934206
):0.000504278
):0.0135172
):0.0680248
):0.0538283
,
(
(
(
(
V135RF-AJFE01070463.1-trbv:0.0104605
,
V16RF-AACZ03053981.1-trbv:0.0104605
):0.0391764
,
V77RF-CABD02352499.1-trbv:0.0496369
):0.038029
,
(
(
V196RF-ABGA01277802.1-trbv:0.0104605
,
V198RF-ABGA01277803.1-trbv:0.0104605
):0.0520484
,
(
V154RF-JABR01088215.1-trbv:0.0617574
,
(
(
V84RF-AQIA01048528.1-trbv:0.00519213
,
V157RF-AHZZ01067653.1-trbv:0.00519213
):0.0160615
,
(
V161RF-AQIB01162313.1-trbv:0.00519213
,
V36RF-JYKQ01029811.1-trbv:0.00519213
):0.0160615
):0.0405038
):0.000751387
):0.0251571
):0.067483
,
(
(
(
V92RF-AQIA01048530.1-trbv:0.0403554
,
(
V87RF-JYKQ01131090.1-trbv:0.0301862
,
(
V168RF-AQIB01162317.1-trbv:0.0273261
,
V149RF-AHZZ01067652.1-trbv:0.0273261
):0.00286007
):0.0101692
):0.0379747
,
(
(
V152RF-AJFE01070463.1-trbv:-0
,
V32RF-AACZ03053988.1-trbv:-0
):0.0568527
,
V16RF-ADFV01062075.1-trbv:0.0568527
):0.0214773
):0.0408343
,
(
(
V15RF-AGCE01062004.1-trbv:-0
,
V16RF-AGCE01062006.1-trbv:-0
):0.139549
,
(
(
V17RF-ADFV01062075.1-trbv:0.0482418
,
(
V23RF-AACZ03053983.1-trbv:0.01852
,
(
V141RF-AJFE01070463.1-trbv:0.00519213
,
V83RF-CABD02352503.1-trbv:0.00519213
):0.0133278
):0.0297218
):0.0461092
,
(
(
(
V97RF-AQIA01048530.1-trbv:0.010684
,
V139RF-AHZZ01067651.1-trbv:0.010684
):0.0519134
,
(
(
V171RF-AQIB01162319.1-trbv:0.0212331
,
V173RF-AQIB01162319.1-trbv:0.0212331
):0.0197522
,
(
V155RF-AHZZ01067652.1-trbv:0.0212331
,
V94RF-JYKQ01131093.1-trbv:0.0212331
):0.0197522
):0.021612
):0.0262667
,
(
(
V180RF-AQIB01162320.1-trbv:0.0569029
,
(
V146RF-AHZZ01067651.1-trbv:0.0104605
,
V102RF-JYKQ01131101.1-trbv:0.0104605
):0.0464425
):0.0202247
,
(
V144RF-JABR01088213.1-trbv:0.092009
,
(
(
V146RF-AJFE01070463.1-trbv:0.0323337
,
V87RF-CABD02352509.1-trbv:0.0323337
):0.0394448
,
(
(
(
V152RF-AHZZ01067652.1-trbv:-0
,
V90RF-JYKQ01131091.1-trbv:-0
):0
,
V91RF-JYKQ01131092.1-trbv:-0
):0.0700314
,
(
V150RF-JABR01088214.1-trbv:0.0653269
,
(
(
V100RF-AQIA01048531.1-trbv:0.0338634
,
(
(
V101RF-AQIA01048532.1-trbv:0.00519213
,
V143RF-AHZZ01067651.1-trbv:0.00519213
):0.0322369
,
(
V142RF-AHZZ01067651.1-trbv:0.0325062
,
(
(
V177RF-AQIB01162320.1-trbv:0.0104605
,
V99RF-JYKQ01131095.1-trbv:0.0104605
):0.0107727
,
V97RF-JYKQ01131094.1-trbv:0.0212331
):0.011273
):0.00492286
):-0.00356565
):0.0197965
,
(
V152RF-JABR01088214.1-trbv:0.062513
,
(
V22RF-ADFV01062076.1-trbv:0.0431503
,
(
V90RF-CABD02352511.1-trbv:0.0338241
,
(
V84RF-CABD02352508.1-trbv:0.0239975
,
(
V25RF-AACZ03053984.1-trbv:0.0158268
,
(
(
V143RF-AJFE01070463.1-trbv:0.00519213
,
V98RF-ABGA01301086.1-trbv:0.00519213
):0.00528783
,
(
V149RF-AJFE01070463.1-trbv:0.00519213
,
V29RF-AACZ03053988.1-trbv:0.00519213
):0.00528783
):0.00534684
):0.00817072
):0.00982658
):0.00932624
):0.0193627
):-0.00885316
):0.0116671
):0.00470453
):0.00174712
):0.0202305
):-0.0148814
):0.0117365
):0.00548684
):0.0451981
):-0.0203847
):0.0359845
):0.0196053
):0.0899277
):0.0097487
):0.30241
):1.33279
,
(
(
(
(
(
(
V110RF-AQIA01048532.1-trbv:-0
,
V130RF-AHZZ01067649.1-trbv:-0
):0.0103522
,
V106RF-JYKQ01131102.1-trbv:0.0103522
):0
,
V59RF-JABR01092448.1-trbv:0.0103522
):0.0272948
,
(
(
V129RF-AJFE01070461.1-trbv:-0
,
V38RF-AACZ03053991.1-trbv:-0
):0.015642
,
V36RF-ABGA01091249.1-trbv:0.015642
):0.022005
):0.335012
,
(
(
V21RF-AGCE01062009.1-trbv:0.0639862
,
(
V131RF-AHZZ01067649.1-trbv:0.015642
,
V107RF-JYKQ01131102.1-trbv:0.015642
):0.0483443
):0.307936
,
(
(
(
(
V132RF-AJFE01070462.1-trbv:-0
,
V36RF-AACZ03053989.1-trbv:-0
):0.00513877
,
(
V95RF-CABD02352514.1-trbv:-0
,
V21RF-ADFV01062075.1-trbv:-0
):0.00513877
):0.0921822
,
(
V137RF-AJFE01070463.1-trbv:0.079462
,
(
V81RF-ABGA01276890.1-trbv:0.0210101
,
V20RF-AACZ03053983.1-trbv:0.0210101
):0.0584519
):0.017859
):0.176495
,
(
V105RF-JZKE01294669.1-trbv:0.227982
,
(
(
(
V103RF-JYKQ01131101.1-trbv:0.0129971
,
(
V105RF-AQIA01048532.1-trbv:0.00513877
,
V125RF-AHZZ01067649.1-trbv:0.00513877
):0.0078583
):0.0917402
,
(
V17RF-AGCE01062008.1-trbv:0.0843248
,
(
V192RF-ABGA01259417.1-trbv:0.0390945
,
(
(
V91RF-CABD02352511.1-trbv:-0
,
V92RF-CABD02352512.1-trbv:-0
):0.0237342
,
(
V153RF-AJFE01070463.1-trbv:0.00513877
,
V33RF-AACZ03053988.1-trbv:0.00513877
):0.0185954
):0.0153603
):0.0452303
):0.0204124
):0.093644
,
(
V74RF-CABD02352494.1-trbv:0.176891
,
(
(
(
V0RF-JABR01013263.1-trbv:0.0617574
,
(
V179RF-AQIB01162320.1-trbv:0.0265195
,
(
V101RF-JYKQ01131098.1-trbv:0.0129971
,
(
V103RF-AQIA01048532.1-trbv:0.0103522
,
V145RF-AHZZ01067651.1-trbv:0.0103522
):0.0026449
):0.0135225
):0.0352379
):0.006923
,
(
(
(
V145RF-AJFE01070463.1-trbv:0.0103522
,
V26RF-AACZ03053986.1-trbv:0.0103522
):0.0147441
,
(
V28RF-AACZ03053988.1-trbv:0.00774547
,
(
V148RF-AJFE01070463.1-trbv:0.00513877
,
V89RF-CABD02352511.1-trbv:0.00513877
):0.0026067
):0.0173508
):0.0458807
,
(
V165RF-JABR01088215.1-trbv:0.0609989
,
(
(
V96RF-AQIA01048530.1-trbv:0.0210101
,
V138RF-AHZZ01067651.1-trbv:0.0210101
):0.0281761
,
(
V95RF-AQIA01048530.1-trbv:0.0264584
,
V154RF-AHZZ01067652.1-trbv:0.0264584
):0.0227278
):0.0118127
):0.00997803
):-0.00229651
):0.044605
,
(
V63RF-ABGA01129113.1-trbv:0.109864
,
(
(
V149RF-JABR01088214.1-trbv:0.0632543
,
(
V174RF-AQIB01162319.1-trbv:0.0656072
,
(
V94RF-ABGA01301078.1-trbv:0.0565407
,
(
(
V99RF-AQIA01048531.1-trbv:0.015642
,
V96RF-JYKQ01131094.1-trbv:0.015642
):0.0306253
,
(
(
V91RF-AQIA01048530.1-trbv:0.0210101
,
V148RF-AHZZ01067652.1-trbv:0.0210101
):0
,
V86RF-JYKQ01131090.1-trbv:0.0210101
):0.0252572
):0.0102734
):0.0090665
):-0.00235283
):0.0169223
,
(
(
V151RF-AHZZ01067652.1-trbv:0.0264995
,
(
V169RF-AQIB01162317.1-trbv:0.0210101
,
V89RF-JYKQ01131090.1-trbv:0.0210101
):0.00548942
):0.0435831
,
(
V100RF-ABGA01301086.1-trbv:0.0404544
,
(
V151RF-AJFE01070463.1-trbv:0.00513877
,
V31RF-AACZ03053988.1-trbv:0.00513877
):0.0353156
):0.0296282
):0.0100941
):0.0296876
):0.00342123
):0.0636059
):0.0214899
):0.0296011
):0.0458334
):0.0981066
):0.000736654
):0.905426
,
(
V63RF-JABR01092448.1-trbv:0.502208
,
(
(
(
(
V0RF-ADFV01062069.1-trbv:0.037647
,
(
V32RF-AJFE01039607.1-trbv:0.0103522
,
V4RF-AACZ03053974.1-trbv:0.0103522
):0.0272948
):0.0235937
,
(
(
V72RF-AQIA01048525.1-trbv:0.015642
,
(
V172RF-AHZZ01067659.1-trbv:-0
,
V25RF-JYKQ01029807.1-trbv:-0
):0.015642
):0.0424151
,
(
V27RF-JYKQ01029807.1-trbv:0.0376037
,
V74RF-JABR01095742.1-trbv:0.0376037
):0.0204534
):0.00318357
):0.110391
,
(
V113RF-JZKE01294700.1-trbv:0.0989132
,
V111RF-ABDC01281097.1-trbv:0.0989132
):0.0727183
):0.247029
,
(
(
V12RF-AGCE01062000.1-trbv:0.197796
,
(
V10RF-AGCE01062000.1-trbv:0.179977
,
(
V118RF-ABDC01368596.1-trbv:0.179077
,
(
V185RF-AQIB01162320.1-trbv:0.128482
,
(
V20RF-AGCE01062009.1-trbv:0.100518
,
(
V147RF-JABR01088213.1-trbv:0.0718037
,
(
(
V34RF-ABGA01091248.1-trbv:0.015642
,
V35RF-ABGA01091248.1-trbv:0.015642
):0.0336437
,
(
(
V97RF-CABD02352515.1-trbv:0.00774547
,
(
(
V133RF-AJFE01070462.1-trbv:-0
,
V37RF-AACZ03053989.1-trbv:-0
):0.00513877
,
V96RF-CABD02352514.1-trbv:0.00513877
):0.0026067
):0.0501019
,
(
V105RF-JYKQ01131102.1-trbv:0.037137
,
(
V129RF-AHZZ01067649.1-trbv:0.0334217
,
(
V184RF-AQIB01162320.1-trbv:0.0366255
,
(
V128RF-AHZZ01067649.1-trbv:0.0237648
,
(
(
(
V108RF-AQIA01048532.1-trbv:0.0103522
,
V58RF-JABR01092448.1-trbv:0.0103522
):0.00528981
,
V109RF-AQIA01048532.1-trbv:0.015642
):0
,
V183RF-AQIB01162320.1-trbv:0.015642
):0.00812283
):0.0128607
):-0.00320389
):0.00371536
):0.0207103
):-0.00856162
):0.022518
):0.0287142
):0.0279645
):0.050595
):0.000899374
):0.0178191
):0.115638
,
(
V19RF-AACZ03053981.1-trbv:0.284013
,
(
(
(
(
V140RF-AJFE01070463.1-trbv:-0
,
V82RF-CABD02352502.1-trbv:-0
):0
,
V22RF-AACZ03053983.1-trbv:-0
):0.09232
,
V15RF-ADFV01062075.1-trbv:0.09232
):0.0737078
,
(
V108RF-JZKE01294672.1-trbv:0.157404
,
(
(
(
V159RF-AQIB01162312.1-trbv:0.037647
,
(
(
(
V82RF-AQIA01048527.1-trbv:-0
,
V167RF-AHZZ01067655.1-trbv:-0
):0
,
V34RF-JYKQ01029809.1-trbv:-0
):0.0264584
,
V171RF-JABR01088216.1-trbv:0.0264584
):0.0111886
):0.0469141
,
(
V200RF-ABGA01277808.1-trbv:0.0376037
,
V13RF-AACZ03053979.1-trbv:0.0376037
):0.0469574
):0.0278173
,
(
(
V76RF-CABD02352499.1-trbv:0.0129971
,
(
V134RF-AJFE01070463.1-trbv:0.00513877
,
V15RF-AACZ03053981.1-trbv:0.00513877
):0.0078583
):0.0830382
,
(
V205RF-JABR01184607.1-trbv:0.0545469
,
(
V160RF-AQIB01162313.1-trbv:0.0323989
,
(
V35RF-JYKQ01029811.1-trbv:0.0320311
,
(
V83RF-AQIA01048527.1-trbv:0.0264584
,
V156RF-AHZZ01067653.1-trbv:0.0264584
):0.00557268
):0.000367891
):0.0221479
):0.0414884
):0.0163431
):0.0450252
):0.00862417
):0.117985
):0.0294214
):0.105226
):0.0835479
):0.905426
):0.427368
):0.414928
):0.368729
):0.385101
):0.370154
):0.282629
):0.295112
):0.0729156
):1.92624
):0.537444
)
;
