# Supplementary material for: Iterative Variable Gene Discovery from Whole Genome Sequencing with a Bootstrapped Multiresolution Algorithm
Source: Comput Math Methods Med. 2019 Feb 11;2019:3780245. doi: 10.1155/2019/3780245 (PMC6388353; doi:10.1155/2019/3780245)
Supplement: Supplementary Materials — supp_materialsV2.pdf: this is an updated document, which includes new figures requested by the reviewer. sequences_alignments.zip: these are genome sequence files that are relevant for reproducing some of the results. [file 3780245.f1.zip › 3780245.f1/sequences_alignments/bstrp_iteration_3_r.fasta]

>V0RF-AJFE01000016.1-trdv |(1583, 1883)|2.97250008499|(0.996,0.986,0.991)|1
-SSVAQKVTQAQSSVSMPVRKAVTLNCLHEASWW----S---YYIFWYKQLPSKEM---I
FLIRQG-S--DEL-----NA-KSGRYSVNFKKAAKSVTLT------IS-ALQLEDSAKYF
CALWE-----
>V1RF-AJFE01003265.1-ighv |(14098, 14407)|3.0|(1.000,1.000,1.000)|1
-VQCEVQLVESG-GGLVQPGGSLRLSCAASGFTF----SS--YWMHWVRQAPGKGL---V
WVSRINS--DGSST--SYADSLKGQFTISRDNAKNTLYLQ------MN-SLRAEDMAVYY
CTR-------
>V2RF-AJFE01011107.1-ighv |(15076, 15385)|2.94462728311|(0.998,0.999,0.955)|1
-TYSQVQLVQSG-HEVKQPGASVKVSCKASGYSF----TT--YGMNWVRQAPGQGL---E
WMGWFNT--YTGNP--TYAQGFTGRFVFSMDTSVGTAYLQ------IS-SLKAEDTAMYY
CAR-------
>V3RF-AJFE01011110.1-ighv |(45852, 46161)|3.0|(1.000,1.000,1.000)|1
-VQCEVQLLESG-GGLVQPGGSLRLSCAASGFTF----SS--YWMHWVRQAPGKGL---E
WVSRINS--DGSST--SYADSVKGRFTISRDNAKNTLYLQ------MN-SLRAEDTAVYY
CTR-------
>V4RF-AJFE01011110.1-ighv |(53572, 53887)|3.0|(1.000,1.000,1.000)|1
-VQCEVQLVESG-GGLVQPGGSLRLSCAASGFTF----SG--SAMHWVRQASGKGL---E
WVGRIRSKANSYAT--AYAASVKGRFTISRDDSKNKAYLQ------MN-SLKTEDTAVYY
CTT-------
>V6RF-AJFE01011111.1-ighv |(20882, 21191)|2.99180001921|(1.000,0.999,0.993)|1
-VQSQVQLVQSG-AEVKKPGSSVKVSCKVSGGTF----SS--YAISWVRQAPGQGL---E
WMGVIIP--ILGTA--NYAQKFQGRVTITADESTSTAYME------LS-SLRSEDTAVYY
CAT-------
>V7RF-AJFE01011113.1-ighv |(30008, 30314)|3.0|(1.000,1.000,1.000)|1
-VQCEVQLVESG-GGLVQPGGSLRLSCAASGFTF----SS--YAMHWVRQAPGKGL---E
WVSLIYS--G-DST--YYADSVKGRFTISRDNSKNTLYLQ------MG-SLRAEDTAVYY
CAR-------
>V8RF-AJFE01011588.1-igkv |(6066, 6365)|3.0|(1.000,1.000,1.000)|1
-ARCDIQVTQSPSSLSASVGDRVTITCRASQGI------S--NGLSWYQQKPGQAP---T
LLIYA-------AS--SLQSGIPSRFSGSG--SGTDFTLT------IS-SLQPEDVATYY
CLQDYTTH--
>V9RF-AJFE01012232.1-igkv |(670, 988)|2.99280401921|(1.000,0.993,1.000)|1
-SSGDIVMTQAPLSLPITPGEPASISCRSSQSLLDSDDGN--TYLDWYLQKPGQSP---Q
LLIYT-------LS--YRASGVPDRFSGSG--SGTDFTLK------IS-RVEAEDVGVYY
CMQHIEFP--
>V10RF-AJFE01012232.1-igkv |(11186, 11479)|2.99899600001|(1.000,1.000,0.999)|1
-ARCDIQMTQSPSSLSASVGDRVTITCRASQSI------S--NYLSWYQQKPGKAP---K
LLIYY-------AS--TLQSGVPSRFSGSG--SGTDFTLT------IS-SLQPEDFATYY
CQHGYG----
>V11RF-AJFE01012232.1-igkv |(33464, 33764)|2.99899600001|(1.000,0.999,1.000)|1
-ARCDIQLTQSPSSLSASVGDRVTITCRASQGI------S--SYLNWYQQKPGKVP---K
LLIYS-------AS--NLQSGVPSRFSGSG--SGTDFTLT------IS-SLQPEDVATYY
CQRTYNAP--
>V12RF-AJFE01012232.1-igkv |(62717, 63017)|2.99899600001|(1.000,1.000,0.999)|1
-ARCDIRMTQSPSSLSASVGDRVTITCQASQDI------S--NYLNWYQQKPGKAP---K
LLIYD-------AS--NLETGVPSRFSGSG--SGTDFTFT------IS-SLQPEDIATYY
CQQYDNLP--
>V13RF-AJFE01012234.1-igkv |(5885, 6200)|2.97411631225|(0.998,0.984,0.993)|1
-SSGDVVMTQSPRSLPVTLGQPASISCRSSQSLVYS-DGN--TYLSWIQQRPGQPP---R
LLIYK-------VS--NRDSGVPDRFSGSG--AGTDFTLK------IS-RVEAEDVGVYY
CVQGIQLP--
>V14RF-AJFE01012234.1-igkv |(16459, 16774)|3.0|(1.000,1.000,1.000)|1
-SSADIVMTQTPLSLSVTPGQPASISCKSSQSLLHSD-GN--TYLYWYLQKPGQSP---Q
LLIYR-------VS--NRASGVPDRFSGSG--SGTDFTLK------IS-RVEAEDVGVYY
CMQGIQLP--
>V15RF-AJFE01012234.1-igkv |(28936, 29251)|2.99798400013|(1.000,0.998,1.000)|1
-SSGDIVMTQSPLSLPVTPGEPASISCRSSQSLLHS-NRY--NYLDWYLQKPGQSP---Q
LLIYL-------GS--NRASGVPDRFSGSG--SGTDFTLK------IS-RVEAEDVGVYY
CMQALQTP--
>V16RF-AJFE01012235.1-igkv |(6765, 7067)|3.0|(1.000,1.000,1.000)|1
-SSGDIVMTQTPLSSPVTLGQPASISCRSSQSLVHS-DGN--TYLSWLQQRPGQPP---R
LLIYK-------VS--NRFSGVPDRFSGSG--AGTDFTLK------IS-RVEAEDVGVYY
CTQA------
>V17RF-AJFE01012235.1-igkv |(23412, 23710)|2.62968474289|(1.000,0.791,0.999)|1
-SRGEIVLTQSPDFQSVPPKEKVTITCRASQSIG--------SSLHWYQQKPGQSP---K
LLIKY-------AS--QSISGVPSRFSGSG--SGTDFTLT------IN-SLEAEDAATYY
CQQSSSL---
>V18RF-AJFE01012236.1-igkv |(7268, 7564)|2.99174403277|(1.000,0.992,1.000)|1
-TTGEIVLMQSSATLSLSPGERATLSCRASQSVS-----S--SYLAWYQQKPGQAP---R
LLIYD-------AS--TRATGIPDRFSGSG--SGTDFTLT------IS-RLEPEDFAVYY
CQQYGS----
>V19RF-AJFE01012238.1-igkv |(1220, 1535)|2.91389210257|(0.997,0.940,0.990)|1
-SSGDIVMTQNPPSLPVNPGEPASISCRSSQSLLHS-NGY--TYLHWYLQKPGQSP---Q
LLIYR-------VS--NRFSGIPDRFSGSG--SGSDFTLK------IS-WVEAEDVGVYY
CMQATQFP--
>V21RF-AJFE01012238.1-igkv |(29982, 30282)|2.99798400013|(1.000,0.998,1.000)|1
-ARCDIQMTQSPSSLSASVGDRVTITCRASQGI------S--NYLAWFQQKPGKVP---K
RLIYA-------AS--SLQSGVPSRFSGSG--SGTEFTLT------IS-SLQPEDFATYY
CLQHNSYP--
>V22RF-AJFE01012238.1-igkv |(62062, 62362)|2.96672055687|(0.992,1.000,0.976)|1
-TTGEIVLTQSPATLSLSPGERATLSCRASQSVS--------SYLAWYQQKPGQAP---R
LLIYG-------AS--NRATGIPARFSGSG--SRTDFTLT------IS-SVEPEDFAVYY
CQQYNNQP--
>V23RF-AJFE01012245.1-igkv |(2610, 2910)|3.0|(1.000,1.000,1.000)|1
-ARCAIQLTQSPSSLSASVGDRVTITCRASQGI------S--NRLNWYQQKPGKAP---K
LLIYD-------AS--SLESGVPSRFSGSG--SGTDFTLT------IS-SLQPEDFATYY
CQQFNSYP--
>V24RF-AJFE01012249.1-igkv |(2485, 2785)|3.0|(1.000,1.000,1.000)|1
-TTREIVLTQSPATLSLSPGEKATLSCRASQSVS--------SYLAWYQQKPGQAP---R
LLIYD-------AS--NRATGIPARFSGSG--SGTDFTLT------IS-SLEPEDFAVYY
CQQRSNWH--
>V25RF-AJFE01016082.1-igkv |(1156, 1468)|2.84797432051|(0.943,1.000,0.920)|1
-CNGDIVLTQSPASLAVSPGQRATITCRASESVSFLG--I--NLIHWYQQKPGQPP---K
LLIYQ-------AS--NKDTGVPAGFSSSG--SGTDFTLT------IN-PVEANDTANYY
CLQSKNFP--
>V26RF-AJFE01024273.1-trdv |(100475, 100781)|3.0|(1.000,1.000,1.000)|1
RGMLCDKVTQSSPDQTVASGSEVVLLCTYDAVY-----SN--PDLFWYRIRPDYSF---Q
FVFYGD-N--SRSQ---AADFTQGRFSVKHILTQKAFHLV------IS-PVRTEDSATYY
CAF-------
>V27RF-AJFE01038664.1-trgv |(28742, 29055)|2.96946712305|(1.000,0.997,0.975)|1
-SQKSSNLEGRTKSVTRETRSSAEITCDLTVT------NT--FYIHWYLHQEGKAP---Q
RLLYYD-V--STARDVLESGLSPGKYYTHT-PRRWSWILR------LQ-NLIENDSGVYY
CATWD-----
>V28RF-AJFE01038665.1-trgv |(1085, 1398)|2.98994800078|(0.997,0.999,0.994)|1
-SQKSSNLEGRTKSVIRQTGSSAEITCDLDGG------ST--GYIHWYLHQEGKAP---Q
RLLYYD-S--YTSRVVLESGISPGKYDTYGS-TRKNLRLI------LR-NLIENDSGVYY
CATWD-----
>V29RF-AJFE01038666.1-trgv |(1901, 2214)|2.94155571893|(0.998,1.000,0.952)|1
-SQKSSNLEGRMKSVTRPTGSSAEITCDLTVI------NA--VYIHWYLHQEGKSP---Q
RLLYYD-V--SNSRDVLESGLSPGKYYTHT-PRRWSWILR------LQ-NLIENDSGVYY
CATWD-----
>V32RF-AJFE01039607.1-trbv |(117721, 118021)|2.98480001|(0.995,1.000,0.990)|1
--LTEPEVTQTPSHQVTQMGQEVILRCVPISNH---------LYFYWYRQILGQKV---E
FLVSFY-N--NEIS--EKSEIFDDQFSVERPD-GSNFTLK------IW-STKLEDSAMYF
CASSE-----
>V33RF-AJFE01039607.1-trbv |(129949, 130246)|3.0|(1.000,1.000,1.000)|1
--PIDTEVTQTPKHLVMGMTNKKSLKCEQHMGH---------RAMYWYKQKAKKPP---E
LMFVYS-Y--EKL---SINESVPSRFSPECPN-SSLLNLH------LH-ALQPEDSALYL
CASSQ-----
>V34RF-AJFE01039607.1-trbv |(137829, 138125)|3.0|(1.000,1.000,1.000)|1
--PVEAGVTQTPRYLIKARGQQVTLSCSPISGH---------RSVSWYQQTPGQGL---Q
FLFEYF-S--ETQR---NKGNFPGRFSGRQFS-NSRSEMN------VS-TLELGDSALYL
CASSL-----
>V35RF-AJFE01039608.1-trbv |(1218, 1515)|3.0|(1.000,1.000,1.000)|1
--PVNAGVTQTPKFQVLKTGQSMTLQCAQDMNH---------NSMYWYRQDPGMGL---R
LIYYSV-G--EGTT---DKGEVPDGYNVSRLN-KREFSLR------LE-SAAPSQTSVYF
CASSE-----
>V36RF-AJFE01039609.1-trbv |(5245, 5558)|2.96265347361|(1.000,1.000,0.967)|1
--PMEMGVTQTPRHLVMGMTNKKSLKCEQHLGH---------NAMYWYKQSAKKPL---E
LMFVYN-F--KEQT---ENNSVPSRFSPECPN-SSHLFLH------LH-ALQPEDSALYL
CASSQDTALQ
>V37RF-AJFE01045032.1-ighv |(257, 569)|2.93700694193|(1.000,0.993,0.953)|1
-VLSQVQLQQWG-PGLVKPSETLSLTCAVYGGSI----SSSGYYWSWIRQPPGKGL---E
WIGEINH---SGST--NYNPSLKSRVTISVDTSKNQFSLK------LS-SVTAADTAVYY
CAR-------
>V38RF-AJFE01045035.1-ighv |(280, 602)|2.72900563293|(0.972,0.850,0.965)|1
-VLSQVTLKESG-PVLVKPTETLTLTCTISGFSL----SNAGMGVSWIRQPPGKAL---E
WLAHIFW---NDEK--SYSTSLKSRLTISKDTSKSQVVLT------MT-NMDPVDTATYY
CTRRAQ----
>V39RF-AJFE01045037.1-ighv |(4711, 5020)|2.994900005|(1.000,0.995,1.000)|1
-THAQVQLVQSG-AEVKKPGATVKISCKASGYTL----TE--LSMHWVRQAPGKGL---E
WMGGFDP--EDGET--IYAQKFQGRVTMTEDTSTDTAYME------LS-SLRSEDTAVYY
CAT-------
>V40RF-AJFE01045037.1-ighv |(12790, 13099)|2.99799600001|(0.999,0.999,1.000)|1
-VQCEVQLVESG-GGLVKPGGSLRLSCAASGFTF----SN--YYMHWVRQAPEKGL---E
WVSTISG--SGGST--WYPDSVKGRFTISRDNSKNTLYLQ------MN-SLRAEDTAVYY
CAR-------
>V41RF-AJFE01045037.1-ighv |(23646, 23958)|3.0|(1.000,1.000,1.000)|1
-VQCEVQLVESG-GGLVKPGGSLRLSCAASGFTF----SS--YSMNWVRQAPGKGL---E
WVAYISS-PSGSST--YYADSVKGRFTISRDNSKNTLYLQ------MN-SLRAEDTAVYY
CAR-------
>V42RF-AJFE01045041.1-ighv |(1266, 1575)|3.0|(1.000,1.000,1.000)|1
-VQCEVQLVESG-GALVKPGGSLRLSCAASGFTF----SS--YGMHWVRQAPGKGL---E
WVSYISY--DSSYI--YYADSVKGRFTISRDNAKNSLYLQ------MN-SLRAEDTAVYY
CAR-------
>V43RF-AJFE01045048.1-ighv |(1386, 1695)|3.0|(1.000,1.000,1.000)|1
-VQCEVQLVESG-GGLVQPGGSLRLSCAASGFTF----DD--YGMSWVRQAPGKGL---E
WVSLISW--DGGST--YYADSVKGRFTISRDNSKNSLYLQ------MN-SLRAEDTALYY
CAR-------
>V44RF-AJFE01045051.1-ighv |(2850, 3156)|2.99899600001|(1.000,1.000,0.999)|1
-VLSQLQLQESG-PGLVKPSETLSLTCTVSGGSI----S--SYYWSWIRQPPGKGL---E
WIGNIYYS---GSA--YYNPSLKSRVTISVDTSKNQFSLK------LS-SVTAADTAVYY
CAR-------
>V45RF-AJFE01045051.1-ighv |(17267, 17573)|3.0|(1.000,1.000,1.000)|1
-VQCEVQLVESG-GGLVQPGGSLRLSCAASGFTV----SS--YHMSWVRQAPGKGL---E
WVSVIYS--GG-ST--YYADSVKGRFTISRDNSKNTLYLQ------MN-SLRAEDTAVYY
CAR-------
>V46RF-AJFE01045051.1-ighv |(31190, 31497)|2.97754104219|(1.000,0.998,0.981)|1
-VCAEVQLVQSG-AEVKKPGESLKISCKGSGYSF----TS--YWIGWVRQMPGKGL---E
WMGIIYP--GDSDT--RYSPSFQGQVTISADKSISTAYLQ------WS-SLKASDTAMYY
CA--------
>V47RF-AJFE01045051.1-ighv |(52919, 53234)|3.0|(1.000,1.000,1.000)|1
-VQCEVQLVESG-GGLVQPGRSLRLSCTASGFTF----GD--YAMSWIRQAPGKGL---E
WVGFIRSKAYGGTT--EYAASVKGRFTISRDDSKSIAYLQ------MN-GLKTEDTAVYY
CTR-------
>V49RF-AJFE01045051.1-ighv |(75870, 76179)|3.0|(1.000,1.000,1.000)|1
-AHSQVQLVQSG-AEVKKPGASVKVSCKASGYTF----TS--YTISWLRQAPGQGL---E
WMGVISP--SDGST--SYAQKFQGRVTMTRDTSTSTVYME------LS-SLRSEDTAVYY
CAR-------
>V50RF-AJFE01045051.1-ighv |(79995, 80304)|3.0|(1.000,1.000,1.000)|1
-AYSQMQLVQSG-AEVKKPGSSVKVSCKASGYTF----TY--RYLHWVRQAPGQAL---E
WMGWITP--YNGNT--NYAQKFQDRVTITRDRSMSTAYME------LR-SLRSEDSAVYY
CAR-------
>V51RF-AJFE01045053.1-ighv |(1090, 1399)|2.9689000027|(0.990,0.993,0.986)|1
-VQCEVQLVESG-GGLVQPGGSLRLSCAASGFTF----SN--SDTNWVHQAPGKGL---E
LVSGVSW--NGSRM--HYADSVKGRFIISRDNSRNSLYLQ------TN-SLRAEDTAVYY
CVR-------
>V52RF-AJFE01069974.1-trav |(29012, 29309)|2.59017965917|(0.992,0.773,1.000)|1
-GLRAQSVAQPEDQVKVAEGNPLTVKCTYSVSG-----N---PYLFWYVQYPNRGL---Q
FLLKYI-T--GDN-----LVKGSYGFEAEFNKSQTSFHLK------KP-SALVSDSALYF
CAVR------
>V53RF-AJFE01069975.1-trav |(15309, 15599)|2.99899600001|(1.000,0.999,1.000)|1
-MTRGEDVEQS-LFLSVREGDSSVINCTYTDSS------S--TYLYWYKQEPGAGL---Q
LLTYIF-S--NMD------MKQDQRLTVLLNKKDKHLSLR------IA-DTQTGDSAIYF
CAES------
>V54RF-AJFE01069975.1-trav |(34873, 35161)|3.0|(1.000,1.000,1.000)|1
--VKSQKIEQNSEALNIQEGKTATLTCNYTNYS------P--AYLQWYRQDPGRGP---V
FLLLIR-E--NEK------EKRKERLKVTFDTTLKQGVFH------IT-ASQPADSATYL
CAL-------
>V55RF-AJFE01069975.1-trav |(49199, 49486)|2.99796800026|(0.998,1.000,1.000)|1
-ANGENQVEHSPHFLGPQQGDVASMSCTYSVSR------F--NNLQWYRQNTGMGP---K
HLLSMY-S--AGY------EKQKGRLNAILLKN--GSSLY------IT-AVQPEDSATYF
CAVD------
>V57RF-AJFE01069975.1-trav |(77622, 77916)|2.99899200002|(0.999,1.000,1.000)|1
-GINGDSVVQTEGQVLLSEGDSLIVNCSYETTQ-----Y---PSLLWYVLYPGEGP---Q
LLLKAM-K--AND------NGRNKGFEATYRKETTSFHLE------KD-SVQESDSAVYF
CALS------
>V58RF-AJFE01069975.1-trav |(91696, 91989)|3.0|(1.000,1.000,1.000)|1
-GSGKNQVEQSPQSLIILEGKNCTLQCNYTVSP------F--NNLRWYKQDTGRGP---V
SLTIMT-F--S-E-----NTKSNGRYTATLDADTKKSSLH------IT-ASQLSDSASYI
CVVS------
>V59RF-AJFE01069975.1-trav |(107426, 107714)|3.0|(1.000,1.000,1.000)|1
VWSQRKEVEQDPGPFNVPEGATVAFNCTYSNSA------S--QSFFWYRQDCRKEP---K
LLMSVY-S--S--------GNEDGRFTAQLNRASQYISLL------IR-DSKLSDSATYL
CAV-------
>V60RF-AJFE01069975.1-trav |(118638, 118935)|2.99799200002|(1.000,0.999,0.999)|1
-TVRAQSVTQPDIHITVSEGASLELRCNYSYGA-----T---PSLFWYVQSPGQGL---Q
LLLKYF-S--GDT-----LVQGIKGFEAEFKRSQSSFNLR------KP-SVHWSDAAEYF
CAVG------
>V61RF-AJFE01069975.1-trav |(134910, 135200)|2.99798400013|(1.000,1.000,0.998)|1
--VNGENVEQHPSTLSVQEGDGAVIKCTYSDSA------S--NYFPWYKQELGKGP---Q
LIIDIR-S--NMG------EKKDQRIAVTLNKTAKHFSLH------IT-ETQPEDSAVYF
CAAS------
>V62RF-AJFE01069975.1-trav |(154372, 154663)|3.0|(1.000,1.000,1.000)|1
VWSQQKEVEQNSGPLSVPEGAIASLNCTYSDRR------S--QSFFWYRQYSGKSP---E
LIMSIY-S--NGD------E-EDGRFTAQLNKASQYVSLL------IR-DSQPSDSATYL
CAV-------
>V63RF-AJFE01069975.1-trav |(160863, 161160)|3.0|(1.000,1.000,1.000)|1
-GTRAQSATQLDSHVSVSEGALVLLRCNYSSSV-----P---PYLFWYVQYPNQGL---Q
LLLKYT-T--GAT-----LVKGINGFEAEFKKSETSFHLT------KP-SAHVNDAAEYF
CAVS------
>V64RF-AJFE01069976.1-trav |(18238, 18531)|2.99899600001|(1.000,0.999,1.000)|1
-VSRGESVGLHLPTLSVQEGDNSIINCAYSNSA------S--DYFIWYKQESGKGP---Q
FIIDIR-S--NMD------KRQGQRVTVLLNKTVKHLSLQ------IA-ATQPGDSAVYF
CAEN------
>V65RF-AJFE01069976.1-trav |(24122, 24425)|2.99899600001|(1.000,0.999,1.000)|1
-PGIAQKITQTQPGMFVQEKEAVTLDCTYDTSD-----PS--YGLFWYKQPSSGEM---I
FLIYQG-S--YDQ-----QNATEGRYSLNFQKARKSANLV------IS-ASQLGDSAMYF
CAVRE-----
>V66RF-AJFE01069976.1-trav |(40935, 41229)|3.0|(1.000,1.000,1.000)|1
-RTRGDSVTQMEGPVTLSEEAFLTINCTYTATG-----Y---PSLFWYVQYPGEGL---Q
LLLKAT-K--ADD------KGSNKGFEATYRKETTSFHLE------KD-SVQASDSAVYF
CALS------
>V67RF-AJFE01069976.1-trav |(65330, 65623)|2.99899200002|(0.999,1.000,1.000)|1
VWSQQKEVEQDPGPLSVPEGAIASLNCTYSNSA------F--QYFMWYRQYSRKGP---E
LLMYTY-S--SGN------K-EDGRFIAQVDTSSKYISLF------IR-DSQPSDSATYL
CAMS------
>V68RF-AJFE01069976.1-trav |(97788, 98075)|3.0|(1.000,1.000,1.000)|1
--VNSQQGEEDPQALSIQEGENAIMNCSYKTS-------I--NNLQWYRQNSGRGL---V
HLILIR-S--NER------EKHSGRLRVTLDTSKKSSSLL------IT-ASRAADTASYF
CATD------
>V69RF-AJFE01069976.1-trdv |(107857, 108160)|3.0|(1.000,1.000,1.000)|1
-SSMAQKVTQAQTEISVVEKEDVTLDCVYETRD-----TT--YYLFWYKQPPSGEL---V
FLIRRN-S--FDE-----QNEISGRYSWNFQKSTSSFNFT------IT-ASQVVDSAVYF
CALSE-----
>V70RF-AJFE01069977.1-trav |(1078, 1365)|3.0|(1.000,1.000,1.000)|1
-LSGEDQVTQSPEALRLQEGESSSLNCSYTVSG------L--RGLFWYRQDPGKGP---E
FLFTLY-S--AGE------EKEKERLKATLTKK--ESFLH------IT-APKPEDSATYL
CAVQ------
>V71RF-AJFE01069977.1-trav |(12990, 13289)|2.88955919449|(0.986,0.926,0.992)|1
-VSSKQEVTQIPAALSVPEGDNLVLNCSFTDSA------I--YSLQWFRQDPGKGL---T
SLLLIQ-S--SQR------EQTSGRLNASLDKSSGRSTLY------IA-ASQPGDSATYL
CAVRHS----
>V72RF-AJFE01069977.1-trdv |(56532, 56832)|2.97250008499|(0.996,0.986,0.991)|1
-SSVAQKVTQAQSSVSMPVRKAVTLNCLHEASWW----S---YYIFWYKQLPSKEM---I
FLIRQG-S--DEL-----NA-KSGRYSVNFKKAAKSVTLT------IS-ALQLEDSAKYF
CALWE-----
>V73RF-AJFE01070458.1-trbv |(41725, 42019)|2.41840236651|(0.902,0.738,0.882)|1
--VRSQTIHQWPATLVQPVGSPLSLECTVEGTS------N--PNLYWYRQAAGRGL---Q
VLFYSV-G--IGQI----SSEVPQNLSASRPQ-DRQFILS------SK-KLLLSDSGFYL
CAWS------
>V74RF-AJFE01104359.1-trbv |(3464, 3764)|2.94630491943|(0.992,0.982,0.974)|1
--SMDTKVTQRPRLLVKANEQKAKTDCVPIKRH---------SYVYWYHKTLEEEL---K
FLIYFQ-N--EEII--QKAEIINERFSAQCPQ-NSPCTLE------IQ-STESGDTAWYF
CANSK-----
>V76RF-AJFE01104359.1-trbv |(36551, 36842)|3.0|(1.000,1.000,1.000)|1
--LMEAEIYQTPRHRVIGTGKKITLECSQTMGH---------DKMYWSRSRNGITP---H
PPFL---W--VNST---EKGDLSSESTVSRIR-IERFPLT------LE-SASPSHTSQYL
CASSE-----
>V77RF-AJFE01104369.1-trbv |(8636, 8939)|2.99799600001|(0.999,0.999,1.000)|1
-SVFSAVISQKPSRDICQRGTSMTIQCQVDSQV---------TMMFWYCQQPGQSM---T
LIATANQG--SEAT--YESRFVIDKFPISRPN-LTFSTLT------VS-NRRPEDSSIYL
CSVE------
>V78RF-AJFE01000028.1-igkv |(103568, 103886)|2.97523355494|(0.999,0.978,1.000)|-1
-SSGDIVMTQTPLSLPVTPGEPASISCRSSESLLDTDDEY--TYLNWYLQKPGQSP---Q
LLIYE-------VS--NRASGVPDRFSGSG--SGTDFTLK------IS-RVEAEDVGVYY
CMQALQTP--
>V79RF-AJFE01002289.1-igkv |(593, 893)|3.0|(1.000,1.000,1.000)|-1
-ARCDIQMTQSPSSLSASVGDRVTITCRASQGI------R--NDLGWYQQKPGKAP---K
LLIYA-------AS--SLQSGVPSRFSGSG--SGTDFTLT------IS-SLQPEDFATYY
CLQDYNYP--
>V80RF-AJFE01002352.1-igkv |(655, 955)|3.0|(1.000,1.000,1.000)|-1
-ARCAIRMTQSPSSLSASTGDRVTITCRASQGI------S--SYLAWYQQKPGKAP---K
LLIYA-------AS--TLQSGVPSRFSGSG--SGTEFTLT------IS-CLQSEDFATYY
CQQYYSYP--
>V81RF-AJFE01003455.1-igkv |(8866, 9184)|2.99389600501|(1.000,0.995,0.999)|-1
-TSGDIVMTQTPLSLPVTPGEPASISCRSSQSLLDSDDGN--AYLDWYLQKPGQSP---Q
LLIYE-------VS--NWASGVPDRFSGSG--SGTDFTLK------IS-RVEAEDVGVYY
CMQALQTP--
>V82RF-AJFE01010527.1-trdv |(4455, 4755)|2.97250008499|(0.996,0.986,0.991)|-1
-SSVAQKVTQAQSSVSMPVRKAVTLNCLHEASWW----S---YYIFWYKQLPSKEM---I
FLIRQG-S--DEL-----NA-KSGRYSVNFKKAAKSVTLT------IS-ALQLEDSAKYF
CALWE-----
>V83RF-AJFE01010527.1-trav |(11555, 11845)|2.98079201242|(0.997,0.991,0.993)|-1
-VSSILNVEQSPQSLHVQEGDSTNFTCSFPSSN------F--YALHWYRWETAKSP---E
ALFVMT-L--NGD------EKKTGRISATLNTKEGYSYLY------IK-GSQPEDSATYL
CAF-------
>V84RF-AJFE01010827.1-iglv |(3125, 3428)|2.99074003277|(1.000,0.999,0.992)|-1
-SVTSYVLTQPP-SVSVAPEQTARITCGGN--N----IGS--KSVHWYQQKPGQAP---V
LVIYD-------DS--DRPSGIPERFSGSK--SGNTATLT------IS-RVEAGDEADYY
CQVWDSSSKH
>V85RF-AJFE01010827.1-iglv |(11046, 11349)|3.0|(1.000,1.000,1.000)|-1
-SVVSSELTQDP-AVSVALGQTVRITCQGD--S----LRS--YYASWYQQKPGQAP---V
LVIYG-------NN--NRPSGIPDRFSGSS--SGNTASLT------IT-GAQAEDEADYY
CSSLDSSGNH
>V86RF-AJFE01010827.1-iglv |(27044, 27354)|2.97170483945|(0.997,0.979,0.997)|-1
-SWAQSALTQPP-SVSGSPGQSVTISCTGTSSDV---GSY--NRVSWDQQPPGKAP---K
LMIYE-------VS--KRPSGVPDRFSGSK--SGNTASLT------IS-GLQAEDEADYY
CSSYTSSST-
>V87RF-AJFE01010828.1-iglv |(147, 450)|2.99899600001|(1.000,1.000,0.999)|-1
-SVTSYVLTQPP-SVSVAPGQTARITCGGN--N----IGS--KSVHWYQQKPGQAP---V
LVVYD-------DS--DQPSGIPERFSGSK--SGNTATLT------IS-RVEAGDEADYY
CQVWDSSSDH
>V88RF-AJFE01010829.1-iglv |(16809, 17106)|3.0|(1.000,1.000,1.000)|-1
-SVASYELTQPS-SVSVSPGQTARITCSGD--V----LAK--NYARWFQQKPGQAP---V
LVIYK-------DS--ERPSGIPERFSGSS--SGTTVTLT------IS-GAQVEDEADYY
CYSAADNN--
>V90RF-AJFE01010857.1-ighv |(227, 534)|2.89365038507|(0.986,0.998,0.925)|-1
-AHSQVQLVQSG-AEVKKPGASVKISCKASGYTF----TS--YGISWVRQAPGQGL---E
WMGWIDA--YYGNT--NYAEKLQGRVTMTTDTSRRTAYME------LR-RLRSDHTAVYY
CA--------
>V91RF-AJFE01017581.1-iglv |(4261, 4557)|2.99899600001|(1.000,0.999,1.000)|-1
-SVASYELTQPP-SVSVSPGQTASITCSGD--K----LGD--KYAYWYQQKSGQSP---V
LVIYQ-------DS--KRPSGIPERFSGSN--SGNTATLT------IS-GTQAMDEADYY
CQAWDSST--
>V93RF-AJFE01017584.1-iglv |(3557, 3860)|3.0|(1.000,1.000,1.000)|-1
-SEASYELTQPP-SVSVSPGQTARITCSGD--A----LPK--QYAYWYQQKSGQAP---V
LIIYE-------DS--KRPSGIPERFSGSS--SGTMATLT------IS-GAQVEDEADYY
CYSTDSSGNH
>V94RF-AJFE01017584.1-iglv |(14566, 14876)|2.93435688246|(1.000,0.988,0.955)|-1
-SWAQSALTQPP-SASRSPGQSVTISCTGTSSDI---GGY--NYVSWYQQHPGKAP---K
LMIYE-------VS--KRPSGVPDRFSGSK--SGNTASLT------VS-GLQAEDEADYY
CSSYAGSNN-
>V95RF-AJFE01017586.1-iglv |(12261, 12571)|2.97087023728|(0.998,1.000,0.975)|-1
-SWAQSALTQPP-SVSGSPGQSVTISCTGTSSDV---GGY--NYVSWYQQHPGTAP---K
LMIYD-------VS--KRPSGVPDRFSGSK--SGNTASLT------IS-GLQAEDEADYY
CCSYAGSYS-
>V97RF-AJFE01020628.1-iglv |(6538, 6850)|2.99899600001|(1.000,0.999,1.000)|-1
-SWAQSVLTQPP-SVSGAPGQRVTISCTGSSSNI---GAG--YDVHWYQQLPGTAP---K
LLIYE-------NN--KRPSGVPDRFSGSK--SGTSASLA------IT-GLQAEDEADYY
CQSYDSSLSG
>V98RF-AJFE01020628.1-iglv |(24239, 24549)|2.70801491226|(0.930,0.836,0.992)|-1
-SLSQPVLTQPP-SFSASPGESARLTCTLPSDIN---VGS--YNIYWYQQKPGSPP---R
YLLYYY-S--DSDK--GQGSGVPSRFSGSKDASANTGILV------IS-GLQSEDAADYY
CMI-------
>V99RF-AJFE01020631.1-iglv |(2749, 3058)|3.0|(1.000,1.000,1.000)|-1
-SWAQSVLTQPP-SVSGTPGQRVTISCSGSSSNI---G-S--NTVNWYQQLPGTAP---K
LLIYS-------NN--QRPSGVPDRFSGSK--SGTSASLA------VS-GLRSEDEADYY
CAAWDDSLNG
>V101RF-AJFE01020631.1-iglv |(24444, 24762)|2.99280401921|(1.000,0.993,1.000)|-1
-SLSQPVLTQPT-SLSASPGASARLTCTLRSGIN---VGS--YYISWYQQKPGSPP---R
YLLNYY-S--DSDK--GQGSGVPSRFSGSKDASTNAGLLL------IS-GLQSEDEADYY
CAIWYS----
>V102RF-AJFE01020632.1-iglv |(18572, 18882)|2.96128218009|(1.000,0.986,0.978)|-1
-SLSQSVVTQPA-SLSASPGASASLTCTLRSGIN---VGT--YRISWYQQKPGSPP---R
YLLRYK-S--DSDK--QQGSGVPSRFSGSKDASANAGILV------IS-GLQSEDEADYY
CMI-------
>V103RF-AJFE01020634.1-iglv |(1918, 2227)|3.0|(1.000,1.000,1.000)|-1
-SWAQSVLTQPP-SVSAAPGQKVTISCSGSSSNI---G-N--NYVSWYQQLPGTAP---K
ILIYD-------NN--KRPSGISDRFSGSK--SGTSATLG------IT-GLQTGDEADYY
CGTWDSSLSA
>V106RF-AJFE01022796.1-iglv |(57629, 57936)|2.98989600501|(0.998,0.993,0.999)|-1
-SWANFMLTQPH-SVSESLGQTVTISCPRSSGSI---A-S--NYVQWYQQRPGSAP---T
TVIYE-------DN--RRPSGVPDRFSGSIDRSSNSASLT------IS-GLKSEDEADYY
CQSYDSS---
>V107RF-AJFE01022798.1-iglv |(2606, 2906)|2.99599600001|(0.999,0.998,0.999)|-1
-SLSQLVLTQSP-SASASLGASVKLTCTLSSGH-----SS--YAIAWHQQQPEKGP---R
YLMKLN-S--DGSH--SKGDGIPDRFSGSSSG--AERYLT------IS-SLQSEDEADYY
CQTW------
>V108RF-AJFE01022798.1-iglv |(70777, 71086)|3.0|(1.000,1.000,1.000)|-1
-VDSQTVVTQEP-PFSVSPGGTVTLTCGLSSGSV---STS--YYPSWYQQTPGQAP---R
TLIYS-------TN--TRSSGVPGRFFGSI--IGNKAALT------IT-GAQADDESDYY
CLLYMGSGI-
>V111RF-AJFE01024276.1-trav |(19317, 19607)|3.0|(1.000,1.000,1.000)|-1
-VSSEDKVVQSPLSLVVHEGDTVTLNCSYEVTN------F--QSLLWYKQEK-KAP---T
FLFMLT-S--SGI------EKKSGRLSSILDKKELFSILN------IT-ATQTGDSAIYL
CAVE------
>V112RF-AJFE01024276.1-trav |(73725, 74027)|3.0|(1.000,1.000,1.000)|-1
-FSMAQTVTQSQPEMSVQEAETVTLSCTYDTSE-----SD--YYLFWYKQPPSRQM---I
LVIRQE-A--YKQ-----QNATENRFSVNFQKAAKSFSLK------IS-DSQLGDAAMYF
CAYRS-----
>V113RF-AJFE01024276.1-trav |(95666, 95954)|3.0|(1.000,1.000,1.000)|-1
-LSGELKVEQSPLFLSTQEGKNYTIYCNYSTT-------S--DRLYWYRQDPGKSL---E
SLFVLL-S--NGA------VKQEGQLMASLDTKARLSTLH------IT-AAVHDLSATYF
CAV-------
>V115RF-AJFE01045439.1-ighv |(4672, 4981)|3.0|(1.000,1.000,1.000)|-1
-VQCEVQLVESG-GGLVQPGGSLTLSCAASGFTF----SS--YWMSWVRQAPGKGL---E
WVANIKK--DGSEK--YYADSVKGRFTISRDNAKNSLYLQ------MN-SLRAEDTAVYY
CAT-------
>V116RF-AJFE01045444.1-ighv |(1979, 2288)|3.0|(1.000,1.000,1.000)|-1
-AHSQVQLVQSG-AEVKKPGASVKVSCKASGYTF----TS--YDINWVRQATGQGL---E
WMGWMNP--NSGNT--GYAQKFQGRVTMTRDTSISTAYME------LS-SLRSEDTAVYY
CAR-------
>V117RF-AJFE01045447.1-ighv |(71, 380)|3.0|(1.000,1.000,1.000)|-1
-VQCEVQLVESG-GGVVQPGRSLRLSCAASGFTF----SN--YAMHWVRQAPGKGL---E
WVSVISS--SGSYI--YYADSVKGRFTISRDNAKNSLYLQ------MN-SLRAEDTALYY
CAK-------
>V118RF-AJFE01045453.1-ighv |(639, 948)|3.0|(1.000,1.000,1.000)|-1
-VQCQVQLVESG-GGLVKPGGSLRLSCAASGFTF----SN--HYMSWIRQAPGKGL---E
WVSYISY--DSSYI--NYADSVKGRFTISRDNAKNSLYLQ------MN-SLRAEDTAVYY
CAR-------
>V119RF-AJFE01047586.1-igkv |(1119, 1419)|3.0|(1.000,1.000,1.000)|-1
-TRCDIQMTQSPSSLSASVGDRVTITCRASQGI------S--NYLAWYQQKPGKAP---K
LLIYY-------AS--RLESGVPSRFSGSG--SGTDYTLT------IS-SLQPEDFATYY
CQQYNSNP--
>V120RF-AJFE01070459.1-trbv |(7045, 7343)|2.35410587611|(0.994,0.998,0.683)|-1
--SMDADVTQTPRNRITKTGKRIMLECSQTKGH---------DRMYWYRQDPGLGL---R
LIYYSF-D--VKDI---NKGEISDGYSVSRQA-QAKFSLS------LE-SAIPNQTALYF
CATSD-----
>V121RF-AJFE01070459.1-trbv |(21089, 21386)|3.0|(1.000,1.000,1.000)|-1
--LMEADIYQTPRYLVIGTGKKITLECSQTMGH---------DKMYWYQQDPGMEL---H
LIHYSY-G--VNST---EKGDLSSESTVSRIR-TEHFPLT------LE-SARPSHTSQYL
CASSE-----
>V123RF-AJFE01070459.1-trbv |(70897, 71194)|3.0|(1.000,1.000,1.000)|-1
--LVDVKVTQSSRYLVKRMGEKVFLECVQDMDH---------ENMFWYRQDPGLGL---R
LIYFSS-D--VKMK---EKGDIPEGYSVSREK-KERFSLI------LE-SASTNQTSMYL
CASSI-----
>V124RF-AJFE01070459.1-trbv |(89682, 89985)|2.98758408012|(1.000,0.990,0.998)|-1
-SVFSAVISQKPSRDICQRGTSLTIQCQVDSQV---------TMMFWYRQQPGQSP---T
LIATANQG--SEAT--YETGFVIDKFPISRPN-LTFSTLT------VS-NMSPEDSSIYL
CSVE------
>V125RF-AJFE01070460.1-trbv |(14989, 15285)|2.95738267424|(0.999,0.965,0.998)|-1
--LSNAGVMQNPRHLVRRRGQEARLRCSPVKGH---------NHVYWYRQLPEEGL---K
FMVYLQ-K--ENII--DESGMPKERFSAEFPK-EGPSILR------IQ-QAVRGDSAAYF
CASS------
>V126RF-AJFE01070460.1-trbv |(18108, 18405)|3.0|(1.000,1.000,1.000)|-1
--TVDGGITQSPKYLFRKEGQNVTLNCEQNLNH---------DAMYWYRQDPGQGL---R
LIYYSQ-I--VNDF---QKGDIAEGYSVSREK-KESFPLT------VT-SAQKNPTAFYL
CASSI-----
>V127RF-AJFE01070460.1-trbv |(35929, 36229)|2.89730326411|(0.994,0.934,0.984)|-1
--STDTKVTQRPRLLVKASEQKAKMDCVPIKGH---------SYVYWYRKKLEEEL---E
FLVYFQ-N--EELI--QKAEIINERFLAQCPK-NSSCTLE------IQ-STESGDTALYF
CASSK-----
>V128RF-AJFE01070460.1-trbv |(44986, 45286)|2.99899600001|(1.000,1.000,0.999)|-1
--SFHAKVTQTPGHLVKGKGQKTKMDCTPEKGH---------VFVYWYQQNQNKEF---M
LLISFQ-N--EQVL--QETEMHKTRFSSQCPK-NTPCSLA------IL-SSEPGDTALYL
CASSQ-----
>V129RF-AJFE01070461.1-trbv |(12301, 12601)|2.97007231762|(0.993,0.999,0.979)|-1
--LIDAGVTQTPRHKVTEMGQEVTMRCQPILGH---------NTVFWYRQTMMQGL---E
LLAYFR-N--RAPL--DDSGMPKDRFSAEMLD-ATLATLK------IQ-PSEPRDSAVYF
CASGL-----
>V130RF-AJFE01070461.1-trbv |(19125, 19425)|2.9843881665|(1.000,0.997,0.988)|-1
--HKEAGVTQFPSHSVIEKGQTVTLRCDPISGH---------DNLYWYRRVMGKEI---K
FLLHFV-R--ESKQ--DESGMPNNRFLAERTG-GTYSTLK------VQ-PAELEDSGVYF
CASSQ-----
>V131RF-AJFE01070461.1-trbv |(29248, 29548)|2.99899600001|(1.000,1.000,0.999)|-1
--SPGEEVTQTPKHLVRGEGQKAKLYCAPIKGH---------SYVFWYQQVLKKEF---K
FLISFQ-N--ENVF--DKTGMPKERFSAKCLS-NSPCSLE------IQ-ATKLEDSAVYF
CASSQ-----
>V132RF-AJFE01070462.1-trbv |(12014, 12314)|2.95204798746|(0.996,0.961,1.000)|-1
--LIEAGVVQSPRYKIIEKKQPVAFWCNPISGH---------NTLYWYWQNLGQGP---E
LLIRYE-N--EEAV--DDSQLPKDRFSAERLK-GVDSTLK------IQ-PAELGDSAVYL
CASSL-----
>V133RF-AJFE01070462.1-trbv |(17609, 17909)|3.0|(1.000,1.000,1.000)|-1
--HTDAGVIQSPRHEVTEMGQEVTLRCKPISGH---------NSLFWYRQTMMQGL---E
LLIYFN-N--NVPI--DDSGMPKDRFSAKMPN-ASFSTLK------IQ-PSEPRDSAVYF
CASSL-----
>V134RF-AJFE01070463.1-trbv |(1165, 1465)|2.99593600205|(1.000,1.000,0.996)|-1
--HTGAGVSQTPSNKVTEKGKDVELRCDPISGH---------AALYWYRQSLGQGP---E
FLIYFR-G--TGAA--DDSGLPNDRFFAVRPE-GSVSTLK------IQ-RTEQGDSAVYL
CASSL-----
>V135RF-AJFE01070463.1-trbv |(5986, 6282)|2.27792896926|(0.972,0.679,0.926)|-1
--PVEAGVTQSLTHLIKTRGQQVTLRCSPISGH---------SSVSWYQQALGQGH---Q
FISEYA-N--ELRR---SEGNFPNRFSGRQFH-DYCSEMN------VS-ALELGDSALYL
CARSL-----
>V137RF-AJFE01070463.1-trbv |(24431, 24731)|2.99798400013|(1.000,1.000,0.998)|-1
--LSEAEVAQSPRYKITEKSQAVAFWCDPISGH---------ATLYWYRQILGQGP---E
LLVQFQ-D--ESVV--DDSQLPKDRFSAERLK-GVDSTLK------IQ-PAELGDSAMYL
CASSL-----
>V139RF-AJFE01070463.1-trbv |(67763, 68060)|2.99385601037|(1.000,1.000,0.994)|-1
--PVNGGVTQTPKFQVLKTGQSMTLQCAQDMNH---------DYMYWYRQDPGMGL---R
LIHYSA-G--AGIT---DKGEVPNGYNVSRSN-TEDFPLS------LV-SAAPSQTSVYF
CASSY-----
>V140RF-AJFE01070463.1-trbv |(71976, 72276)|3.0|(1.000,1.000,1.000)|-1
--HTGAGVSQSPRYKVAKRGRDVALRCDSISGH---------VTLYWYRQTLGQGS---E
VLTYFR-S--DAQR--DKSGRPSGRFSAERPE-RSVSTLK------IQ-RTEQGDSAVYL
CASSL-----
>V141RF-AJFE01070463.1-trbv |(79903, 80199)|2.99899600001|(1.000,0.999,1.000)|-1
--SVETGVTQSPTHLIKTRGQQVTLRCSPQSGH---------NTVSWYQQALGQGP---Q
FIFQYY-R--EEEN---GRGNFSPRFSGRQFP-NYSSELN------VN-ALELDDSALYL
CASSL-----
>V142RF-AJFE01070463.1-trbv |(86346, 86643)|2.99899600001|(1.000,0.999,1.000)|-1
--PVNAGVTQTPKFRILKIGQSMTLQCAQDMNH---------NYMYWYRQDPGMGL---K
LIYYSV-G--AGIT---DKGEVPNGYNVSRST-TEDFPLR------LE-SAAPSQTSVYF
CASSY-----
>V143RF-AJFE01070463.1-trbv |(99363, 99659)|2.99798400013|(1.000,0.998,1.000)|-1
--PVDAGVTQSPTHLIKTRGQHVTLRCSPISGH---------KSVSWYQQALGQGP---Q
FIFEYY-E--KEER---GRGNFPDRFSARQFP-NYSSELN------VN-ALLLGDSALYL
CASSL-----
>V145RF-AJFE01070463.1-trbv |(108994, 109294)|2.99698000014|(0.998,1.000,0.999)|-1
--HTGAGVSQSPRYKVTKRGQDVTLRCDPISGH---------VALYWYQQALGQGP---E
FLTYFN-Y--EAQP--DKSGLPNDRFSAERPE-GSNSTLT------IQ-RTEQRDSAMYL
CASNL-----
>V146RF-AJFE01070463.1-trbv |(116814, 117110)|2.99599600001|(0.999,0.998,0.999)|-1
--SVDAGVTQSPIHLIKTRGQQVTLRCSPQSGH---------DTVSWYQQVLGQGP---Q
CIFEYY-E--EEER---QRGNFPDRFSGHQFP-NYSSELN------VN-ALLLGDSALYL
CASSL-----
>V147RF-AJFE01070463.1-trbv |(124111, 124405)|2.81353995204|(0.989,0.935,0.920)|-1
--PVNAGVTQTPKFRILKTGQSMTLQCARDMNH---------GYMSWYRQDPGMGL---R
LIYYSA-A--AGT----TDKEVPNGYNVSRLN-TEDFPLR------LV-SAAPSQTSVYF
CASSY-----
>V148RF-AJFE01070463.1-trbv |(128406, 128706)|2.99696400065|(1.000,1.000,0.997)|-1
--HTGAGVSQSPRYKVTKRGQDVTLRCDPISSH---------ATLYWYQQALGQGP---E
FLTYFN-Y--EAQP--DKSGLPNDRFSAERPE-GSISTLT------IQ-RTEQRDSAMYL
CASSL-----
>V149RF-AJFE01070463.1-trbv |(136837, 137133)|3.0|(1.000,1.000,1.000)|-1
--PVDAGVTQSPTHLIKTRGQHVTLRCSPISGH---------TSVSWYQQALGQGP---Q
FIFQYY-E--KEER---GRGNFPDRFSARQFP-NYSSELN------VN-ALLLGDSALYL
CASSL-----
>V150RF-AJFE01070463.1-trbv |(144146, 144443)|2.99899600001|(1.000,0.999,1.000)|-1
--PVNAVVTQTPKFQVLKTGQSMTLQCAQDMNH---------DCMSWYRQDPGMGL---R
RIHYSV-A--AGIT---DKGEVPDGYNVSRSN-KEDLPLR------LE-SAAPSQTSVYF
CASSY-----
>V151RF-AJFE01070463.1-trbv |(148806, 149106)|2.99899600001|(1.000,0.999,1.000)|-1
--HTGAGVSQSPKYKVTKRGQDVALRCDPISGH---------VSLFWYQQALGQGP---E
FLTYFR-N--EAQL--DKSGLPSDRFFAERPE-GSVSTLK------IQ-RTQQEDSAVYL
CASSL-----
>V152RF-AJFE01070463.1-trbv |(157011, 157307)|3.0|(1.000,1.000,1.000)|-1
--PVEAGVTQSPTHLIKTRGQQVTLRCSPISGH---------TSVYWYQQALGLGL---Q
FLLWYD-E--GEER---NRGNFPRRFSGRQFP-NYSSELN------VN-ALELEDSALYL
CASSL-----
>V153RF-AJFE01070463.1-trbv |(166234, 166534)|3.0|(1.000,1.000,1.000)|-1
--HADTGVSQDPSHKITKRGQNVTFRCDPISEH---------NRLYWYRQTLGQGP---E
FLTYFQ-N--EAQL--EKSRLLSDRFSAERPK-GSFSTLE------IQ-HTEQGDSAIYL
CASSL-----
>V154RF-AJFE01070463.1-trbv |(172755, 173052)|3.0|(1.000,1.000,1.000)|-1
--SVAAGVIQSPRYLIKEKRETATLKCYPIPRH---------DTVYWYQQGPGQDP---Q
FLISFY-E--KMQS---DKGSIPDRFSAQQFS-DYHSELN------MS-SLELGDSALYF
CASSS-----
>V155RF-AJFE01070464.1-trbv |(8813, 9110)|3.0|(1.000,1.000,1.000)|-1
--PLDTAVSQTPKYLVTQMGKKESLKCEQNLGH---------NAMYWYKQDSKKFL---K
TMFIYS-N--KEPI---LNETVPNRFSPDSPD-KAHLNLH------IN-SLELGDSAVYF
CASSQ-----
>V156RF-AJFE01070464.1-trbv |(12266, 12563)|3.0|(1.000,1.000,1.000)|-1
--PMEMGVTQTPRHLVMGMTNKKSLKCEQHLGH---------NAMYWYKQSAKKPL---E
LMFVYS-L--EERV---ENNSVPSRFSPECPN-SSHLFLH------LH-TLQPEDSALYL
CASSQ-----
>V157RF-AJFE01070464.1-trbv |(20566, 20863)|2.99899600001|(1.000,0.999,1.000)|-1
--PVNAGVTQTPKFRVLKTGQSMSLLCAQDMNH---------EYMYWYRQDPGMGL---R
LIHYSV-G--EGTT---AEGEVPDGYNVSRLK-KQNFLLG------LE-SAAPSQTSVYF
CASSY-----
>V158RF-AJFE01070464.1-trbv |(52077, 52374)|3.0|(1.000,1.000,1.000)|-1
--PVIAGITQAPTSQILAAGRSMTLRCTQDMRH---------NAMYWYRQDLGLGL---R
LIHYSN-T--AGTT---GKGEVPDGYSVSRAN-TDDFPLT------LA-SAVPSQTSVYF
CASSD-----
>V159RF-AJFE01070465.1-trbv |(4903, 5200)|2.99899200002|(0.999,1.000,1.000)|-1
--PVNAGVTQSPKFRVLKTGQSMTLQCAQDMNH---------NYMYWYRQDPGMGL---R
LIHYSA-G--EGTT---AKGEVPDGYNVSRLN-TQNFLLR------LE-SAAPSQTSVYF
CATSE-----
>V160RF-AJFE01119867.1-ighv |(1662, 1971)|2.91508424741|(0.982,0.981,0.955)|-1
-AQSRVQLAQSG-AEVKKPGASVKVSCKASGYTF----TS--YRMHWVCQAHAQGL---E
WMGLVCP--SDGST--SHAQKFQGRVTITRDTSMSTAYME------LS-SLRSEDTAMYY
CVR-------
>V161RF-AJFE01119883.1-ighv |(31777, 32092)|2.99899200002|(0.999,1.000,1.000)|-1
-VQCEVQLVESG-GGLVQPGGSLRLSCAASGFTF----SD--HYMSWVRQAQGKGL---E
LVRLIRNKANSYTT--EYAASVKGRFTISREDSKNTLYLQ------MS-SLKTEDLAVYY
CAR-------
>V0RF-AQIA01007569.1-iglv |(1992, 2302)|2.50365647942|(0.991,0.942,0.765)|1
-SWAQSAPIQSP-SVSGSLGQSVTISCTGTSSDI---GRY--NYVSWYRQQPGTTT---K
LMMYK-------VN--MRPSGVSDRFSGSK--SGNTASLT------IS-GLQAEDEADYY
CSSYEASDT-
>V1RF-AQIA01007574.1-iglv |(14067, 14370)|2.99899600001|(1.000,0.999,1.000)|1
-SWAQAAPTQPP-SVSGSPGQSVTISCTGTSSDI---GGY--NRVSWYQQHPGKAP---K
LMIYE-------VS--KRPSGVSDRFSGSK--SGNTASLT------IS-GLQAEDEADYY
CSSYAGS---
>V3RF-AQIA01007574.1-iglv |(37774, 38077)|3.0|(1.000,1.000,1.000)|1
-SAASYELTQPP-SVSVSPGQTARITCSGD--A----LPK--KYAYWFQQKPGQSP---V
LIIYE-------DS--KRPSGIPERFSGSS--SGTVATLT------IS-GAQVEDEADYY
CYSTDSSGNH
>V5RF-AQIA01007574.1-iglv |(48578, 48881)|2.99899600001|(1.000,1.000,0.999)|1
-SWAQAALTQPP-SVSGSPGQSVTISCTGTSSDI---GGY--NRVSWYQQHPGKAP---K
LMIYE-------VS--KRPSGVSDRFSGSK--SGNTASLT------IS-GLQAEDEADYY
CSSYASS---
>V6RF-AQIA01007575.1-iglv |(6771, 7074)|3.0|(1.000,1.000,1.000)|1
-SWAQAALTQPP-SVSGSPGQSVTISCTGTSSDV---GGY--NYVSWYQQHPGKAP---K
LMIYD-------VS--KRPSGVSDRFSGSK--SGNTASLT------IS-GLQAEDEADYY
CSSYAGS---
>V8RF-AQIA01007576.1-iglv |(8743, 9046)|3.0|(1.000,1.000,1.000)|1
-SAVSYELTQPP-SVSVSPGQTARITCGGD--N----LGS--KYVHWYQQKPAQAP---V
LVIYY-------DS--DRPSGIPERFSGSK--SGNTATLT------IS-GVEAGDEADYY
CQVWDSSSDH
>V9RF-AQIA01007576.1-iglv |(19712, 20015)|3.0|(1.000,1.000,1.000)|1
-SWAQAALTQPR-SVSGSPGQSVTISCTGTSSDI---GGY--NYVSWYQQHPGTAP---K
LMIYE-------VS--KRPSGVSDRFSGSK--SGNTASLT------IS-GLQAEDEADYY
CCSYAGS---
>V11RF-AQIA01007576.1-iglv |(37606, 37909)|2.97138527945|(0.997,0.977,0.999)|1
-SAASYDVTQPR-SVSVSPGQTARITCGGD--N----IGS--KVVHWYQQKPAQAP---V
LVIYR-------DS--NRPSGIPERFSGSN--SGNTATLT------IS-GVEAGDEADYY
CQVWDSSSDH
>V12RF-AQIA01007576.1-iglv |(45242, 45545)|3.0|(1.000,1.000,1.000)|1
-SVVSSELTQDP-AVSVALGQTVRITCQGD--S----LRS--YYASWYQQKPGQAP---V
LVVYG-------NN--NRPSGIPERFSGSS--SGNTASLT------IT-GAQVEDEADYY
CDSWDSSGTH
>V13RF-AQIA01007576.1-igkv |(63773, 64083)|2.62854816475|(0.960,0.817,0.933)|1
-SWAQAALTQPP-SVSKSLGQSVTISCAGTSSGI---ASY--SDVSWYQQHPGTAP---R
LLIYR-------VS--NRPSGVSDRFSGFK--SGSTASLT------IS-GLQAEDEAIYY
CCSYRSGST-
>V14RF-AQIA01007576.1-iglv |(72187, 72490)|2.99696400065|(1.000,0.997,1.000)|1
-SATSYELTQPP-SVSAASGQTARITCGGD--N----IGS--KNVQWYQQKPAQAP---V
LVIYA-------DS--DRPSGIPERFSGSN--SGNTATLT------IS-GVEAGDEADYY
CQVWDSSSDH
>V15RF-AQIA01007584.1-iglv |(1279, 1588)|2.99899200002|(0.999,1.000,1.000)|1
-SWAQSVLTQPP-SASEAARKSVTISCSGSSSNI---G-S--NSVSWYQQLPGTAP---K
LLIYY-------ND--QRASGVSDRFSGSK--SGTSASLA------IS-GLQTEDEADYY
CAAWDDSLSG
>V16RF-AQIA01007585.1-iglv |(7569, 7879)|2.68346443736|(0.991,0.979,0.822)|1
-SLSQPVLTQPA-SLSASPGASASLTCTFSGGIN---VAG--YHIFWYQQKPGSPP---R
YLLRYK-S--DSDK--GQGSGVPSRFSGSKDASANTGILR------IS-GLQSEDEADYY
CAI-------
>V17RF-AQIA01007586.1-iglv |(17179, 17489)|2.98548011776|(1.000,0.997,0.989)|1
-SLSQPVLTQPT-SLSASPGASARLSCTLSSGIN---VGS--YSIYWYQQKPGSPP---R
YLLYYY-S--DSSK--HQGSGVPSRFSGSKDASANAGLLL------IS-GLQSEDEADYY
CAI-------
>V18RF-AQIA01007586.1-iglv |(27894, 28201)|2.99392000218|(0.996,1.000,0.998)|1
-SWAQSVLTQPP-SVSAVPGQKVTISCSGSSSNI---G-R--SCVSWYQQVPGTAP---K
LLIYQ-------DN--KRPSGVSDRFSGSK--SGTSASLA------IT-GLQTGDEADYY
CSAWDSSLS-
>V19RF-AQIA01007586.1-iglv |(32056, 32365)|2.98851611711|(1.000,1.000,0.989)|1
-SWAQSVLTQPP-SVSGDPGQRVTISCTGSSSNI---G-G--YDVYWYQQLPGTAP---K
LLIYE-------NN--KRPSGVSDRFSGSK--SGTSASLA------IT-GLQSEDEAEYY
CETWDNSLNG
>V20RF-AQIA01007586.1-iglv |(37066, 37373)|2.99798400013|(1.000,1.000,0.998)|1
-SWAQSVLTQPP-SVSGDPGQRVTISCTGSSSNI---G-G--YYVYWYQQFPGTAP---K
LLIYD-------NN--KRPSGVSDRFSGSK--SGTSASLT------IT-GLQPGDEADYY
CGAWDSSLS-
>V21RF-AQIA01007586.1-iglv |(42885, 43192)|2.98070483945|(1.000,1.000,0.982)|1
-SWAQSVLTQPP-SVSGAPGQRVTISCTGSSSNI---G-G--YYVSWYQQLPGTTP---K
LLIYQ-------DN--KRPSGVSDRFSGSK--SGTSASLT------IT-GLQTEDEADYY
CLSYDSSLS-
>V22RF-AQIA01007587.1-iglv |(5318, 5628)|2.94926255615|(1.000,0.959,0.997)|1
-SLSQPVLTQPT-SLSASPGASVRLTCTLRSGIS---VGG--YNIHWYQQKPGSPP---R
YLLYYY-S--DSNK--GQGSGVPSRFSGSKDASANAGILL------IS-GFQSEDEADYY
CTT-------
>V23RF-AQIA01007587.1-iglv |(10143, 10452)|3.0|(1.000,1.000,1.000)|1
-SWAQSVLTQPP-SASGAPGQSVTISCSGSSSNI---G-S--NYVNWYQQLSGKAP---K
LLIYN-------NN--QRPSGVPDRFSGSK--SGTSASLA------IS-GLQSEDEADYY
CAAWDSSLSG
>V24RF-AQIA01007588.1-iglv |(1406, 1715)|2.99899600001|(1.000,0.999,1.000)|1
-SWAQSVLTQPP-SASGAPGQSVTISCSGSSSNI---G-S--NDVYWYQQFPGTAP---K
LLIYY-------SN--QRPSGVPDRFSGSK--SGTSASLA------IT-GLRSEDEADYY
CAAWDDSLSS
>V25RF-AQIA01007588.1-iglv |(19880, 20189)|2.91623800393|(0.999,0.934,1.000)|1
-SWAQSVLTQPP-SASGAPGQSVTISCSGSSSNI---R-G--NGVHWYQQLSGMAP---K
LLIYN-------NN--QRPSGVPDRFSGSK--SGTSASLA------IT-GLRSEDEADYY
CEAWDNSLSG
>V26RF-AQIA01007589.1-iglv |(4140, 4447)|3.0|(1.000,1.000,1.000)|1
-SWAQSVLTQPP-SVSGAPGQRVTISCTGSSSNI---G-G--YYVQWYQQLPGTAP---K
LLIYE-------NN--KRPSGVSDRFSGSQ--SGTSASLT------IT-GLQSEDEADYY
CQSYDSSLS-
>V27RF-AQIA01007589.1-iglv |(26788, 27098)|2.97880866856|(1.000,0.983,0.997)|1
-SLSQPVLTQPT-SLSASPGASARLTCTLSSGIS---VGS--YRIFWYQQKPGSPP---R
YLLNYH-T--DSDK--HQGSGVPSRFSGSKDASANAGILL------IS-GLQSEDEADYY
CMI-------
>V28RF-AQIA01007590.1-iglv |(12131, 12441)|2.99593600205|(1.000,0.996,1.000)|1
-SWAEVVFTQPH-SVSGSPGQTVTISCTRSSGSI---G-S--SYVYWYQQRPGSAP---T
TVIYK-------DN--QRPSGVPDRFSGSIDSSSNSASLT------IS-GLKSEDEADYY
CQSYDSSG--
>V31RF-AQIA01007600.1-iglv |(7012, 7324)|2.9969280013|(0.997,1.000,1.000)|1
-SWAEVVFTQPH-SVSGSPGQTVTISCTRSSGSI---D-S--KYVQWYQQRPGSAP---T
TVIYK-------DN--QRPSGVPDRFSGSIDSSSNSASLA------IS-GLKSEDEADYY
CQSADGSYN-
>V33RF-AQIA01007605.1-iglv |(38320, 38626)|2.99899600001|(1.000,1.000,0.999)|1
--DSETVVTQEP-SLSVSPGGTVTLTCGLSSGSV---STS--NYPSWYQQTPGQAP---R
TLIYS-------TN--TRPSGVPDRFSGSI--LGNKAALT------IT-GAQADDESDYY
CTLYMGSGI-
>V34RF-AQIA01007915.1-ighv |(45465, 45774)|2.86758501962|(0.985,0.997,0.909)|1
-VQCEVQLVEPG-GGLVQPGGSMRLSCAASGFTF----SS--YGMSWVHQTPGKGL---E
WVSTISG--NGVST--WYPDAVKGQFTISRNNTKNSLYLQ------MN-SLSVEDIAVYY
CAK-------
>V35RF-AQIA01009600.1-iglv |(7837, 8140)|2.99899600001|(1.000,1.000,0.999)|1
-SWAQSAPTQPP-SVSGSPGQSVTISCTGTSSDV---GGY--NYVSWYQQHPGKAP---K
LMIYG-------VS--KRPSGVSDRFSGSK--SGNTASLT------IS-GLQAEDEADYY
CCSYTTS---
>V36RF-AQIA01009600.1-iglv |(20648, 20951)|2.99799200002|(1.000,0.999,0.999)|1
-SAASYDLTQPP-SVSVSPGQTARITCGGD--N----IGS--EVVNWYQQKPPQAP---V
LVIYA-------DS--ERPSGIPERFSGSN--SGNTATLT------IS-GVEAGDEADYY
CQVWDISSDH
>V37RF-AQIA01009608.1-iglv |(4448, 4751)|2.991900005|(0.999,0.994,0.999)|1
-SWAQSALTQPP-SVSKSLGQSVTISCTGTSSDI---GGY--NGVSWYQQHSGTAP---R
LLIYE-------VS--KRPSGVSDRFSGSK--SGNTASLT------IS-GLQAEDEADYY
CCSYRSG---
>V38RF-AQIA01017094.1-igkv |(176237, 176552)|2.99496000066|(0.999,1.000,0.996)|1
-SSGDIVMTQTPLSLSVTPGEPASISCRSSQSLLHS-NGY--TYLHWYLQKPGQSP---Q
LLIYL-------VS--NRPSGVPDRFSGSG--SGTDFTLK------IS-RVEAEDVGVYY
CEQTLQTP--
>V39RF-AQIA01017096.1-igkv |(35522, 35822)|2.99899200002|(0.999,1.000,1.000)|1
-ARCDIQMTQSPSSLSASVGDRVTVTCRASQGI------N--KELSWYQQKPGKAP---T
LLIYA-------AS--SLQTGVSSRFSGSG--SGTDYTLT------IS-SLQPEDVATYY
CLQDYNTP--
>V41RF-AQIA01017097.1-igkv |(8073, 8388)|2.99082001102|(1.000,0.997,0.994)|1
-SSGDIVMTQTPLSLPVTPGEPASISCRSSQSLLDS-DGY--TCLDWYLQKPGQSP---Q
LLIYE-------VS--NRVSGVPDRFSGSG--SGTDFTLK------IS-RVEAEDVGVYY
CMQSIEFP--
>V43RF-AQIA01017097.1-igkv |(38546, 38864)|2.95609598554|(0.998,1.000,0.963)|1
-SSGDIVMTQTPLSLPVTPGEPASISCRSSQSLLDSEDGN--TYLDWYLQKPGQSP---Q
PLIYE-------VS--NRASGVPDRFSGSG--SDTDFTLK------IS-RVEAEDVGVYY
CMQYTHIP--
>V45RF-AQIA01017097.1-igkv |(61240, 61555)|2.96115712206|(0.978,0.997,0.988)|1
-SSGDIVMTQTPLSLPVTLGEPASISCRSSQSLVYS-DGK--TYLYWYLQKPGQSP---Q
LLMYL-------VS--KRASGVPDKFSGSG--SGTDFTLK------IS-RVEAEDVGVYY
CMQALRSP--
>V47RF-AQIA01017097.1-igkv |(69341, 69641)|3.0|(1.000,1.000,1.000)|1
-ARCDIQMTQSPSSLSASVGDTVTITCRASQGI------N--NELAWYQQKPGKAP---T
LLLYS-------GS--SLHTGVPSQFSGSG--SGTDFTLT------IS-SLQPEDVATYY
CRQDYNTP--
>V48RF-AQIA01017097.1-igkv |(77437, 77752)|2.97309640489|(0.996,0.981,0.997)|1
-SSGDIVMTQTPLSLPVTPGEPASISCRSSQSLLDS-DGY--THLHWYLQKPGQSP---Q
LLMYL-------VS--NRASGVPDRFSGSG--SGTDFTLK------IS-RVEAEDVGVYY
CMQTLQTP--
>V49RF-AQIA01017099.1-igkv |(11233, 11548)|2.96845704707|(0.998,0.993,0.979)|1
-TSGDIVMTQTPLSLPVTPGEPASISCRSSQSLLHS-NGY--TYLFWYLQKPGQSP---Q
LLIYL-------VS--NRASGVPDRFSGSG--SGTDFTLK------IS-RVEAEDVGVYY
CLQDIQLP--
>V50RF-AQIA01017099.1-igkv |(19461, 19761)|2.99798400013|(1.000,1.000,0.998)|1
-ARCDIQMTQSPSALSASVGDRVTISCRASQNI------Y--SGLAWYQQKPGKAP---K
LLIYA-------AS--RLQSGIPSRFSGSG--SGTDFTLT------IS-SLQPEDSAAYY
CQQVYSNP--
>V51RF-AQIA01017100.1-igkv |(7491, 7806)|2.99798400013|(1.000,1.000,0.998)|1
-TSGDIVMTQTPLSLPVTPGEPASISCRSSQSLLHS-DGY--TYLDWYLQKPGQSP---Q
LLIYL-------GS--KRASGVPDRFSGSG--SGTDFTLK------IS-RVEAEDVGVYY
CMQGTQLP--
>V52RF-AQIA01017105.1-igkv |(1136, 1436)|3.0|(1.000,1.000,1.000)|1
-ARCDIQMTQSPSSLSASVGDTVTITCRASQGI------S--NDLAWYQQKPGETP---K
LLIYE-------AS--SLQSGIPSRFSGSG--SGTDFTLT------IS-SLQSEDFATYY
CQHYYSTP--
>V53RF-AQIA01017109.1-igkv |(27445, 27743)|2.86078943915|(1.000,1.000,0.900)|1
-ARCDIQMTQSPSSLSASVGDRVTITCQASQGI------S--NNLAWYQQKPGKVP---K
LLIYK-------AS--TLQSGVPSRFSGSG--SGTDFTLT------IS-SLQPEDFATYY
CQHGYGI---
>V54RF-AQIA01017115.1-igkv |(12703, 13003)|2.99280401921|(1.000,0.993,1.000)|1
-ARCDIQMTQSPSSLSASVGDRVTITCRASENV------N--NYLHWYQQKPGKAP---K
LLIYA-------AS--TLQSGVPSRFSGSG--SGTDYTLT------IS-SLQSEDVATYY
CQHSYGTP--
>V55RF-AQIA01017115.1-igkv |(28053, 28368)|2.95715937872|(0.997,0.998,0.966)|1
-SSGDIVMTQTPLSLPVTPGEPASISCRSSQSLLHS-DGN--TYLYWYLQKPGQPP---R
LLIYR-------VS--NRFSGVPDRFSGSG--SGTDFTLK------IS-RVKAEDVGVYY
CMQALQTP--
>V56RF-AQIA01017115.1-igkv |(33048, 33363)|2.97103640693|(0.997,0.982,0.993)|1
-SSGDIVMTQTPLSLPITPGEPASISCRSSQSLLHS-NGN--TYFHWYLQKPGQSP---Q
LLIYG-------GS--NRASGVPDRFSGSG--SGTDFTLK------IS-KVEAEDVGVYY
CVQAIAFP--
>V57RF-AQIA01017115.1-igkv |(51966, 52281)|2.99494800078|(1.000,0.997,0.998)|1
-SSGDIVMTQTPLSLPVTPGEPASISCRSSQSLLHS-NGN--TYLYWYLQKPGQPP---R
LLIYR-------VS--NRFSGVPDRFSGSG--SGTDFTLK------IS-RVEAEDVGVYY
CMQALQTP--
>V58RF-AQIA01017115.1-igkv |(73836, 74136)|2.99899600001|(1.000,1.000,0.999)|1
-ARCDIQMTQSPSSLSASVGDRVTITCRASQGI------S--NWLAWYQQKPGKAP---K
LLIYR-------AS--NLETGVPSRFSGSG--SGTDFTLT------IS-SLQPEDIATYY
CQQHDNSP--
>V59RF-AQIA01017115.1-igkv |(81810, 82124)|2.9468704721|(0.996,1.000,0.957)|1
-SSGDIVMTQTPLSLPVTPGEPASISCRSSQSLLHS-NGN--TYLHWYLQKPGQSP---R
LLIYK-------VT--NRESGVPDRFSGSG--SGTDFTLK------IS-RVEPEDVGVYY
CMQSTKDP--
>V60RF-AQIA01017139.1-igkv |(30471, 30771)|2.99899200002|(0.999,1.000,1.000)|1
-TTGQVILTQSPATLSLSPGERATLSCRASQSVS--------SYLAWYQQKPGQAP---R
LLIHS-------AS--SRATGIPDRFSGSG--SGTEFTLT------IS-SLEPEDVGVYH
CYQYYSGY--
>V61RF-AQIA01017139.1-igkv |(39707, 39995)|2.38558983335|(0.763,0.801,0.887)|1
-----TILTQSAAFVSATPGDKVTISCKASQDI------D--DDMNWYQQEPGEAP---K
LIIKD-------AT--TLVSGIPPRFSGSG--YGTDFTLT------IN-NVESEDAAYYF
CLQHDNFP--
>V62RF-AQIA01017140.1-igkv |(859, 1159)|2.99899600001|(1.000,1.000,0.999)|1
-AKCDIQMTQSPTFLSASVGDRVTIACRASQSI------N--KGLAWYQQKPGKAP---K
LLISY-------AS--NLYTDVPSRFSGSG--SGTDFTLT------IS-SLQPEDAATYY
CFQYNSYP--
>V64RF-AQIA01017150.1-igkv |(11178, 11496)|2.99899600001|(1.000,1.000,0.999)|1
-ACGDIVMTQSPDSLAVSLGERVTINCKSSQSLLYSSNNK--NYLAWYQQKPGQAP---K
LLIYW-------AS--TRESGVPNRFSGSG--SGTDFTLT------IS-GLQAEDVAVYY
CQQYYSTP--
>V66RF-AQIA01046502.1-trgv |(44235, 44548)|2.98742416586|(1.000,1.000,0.988)|1
-SQKSSNLEGRTKSVTRPTGSSAEITCDLPEV------SS--FYIHWYLHQEGKAP---Q
RLLYYD-S--SNSRVVLESGISPGKYDTYGS-TRSNLRLI------LR-NLIENDSGVYY
CANWD-----
>V67RF-AQIA01046502.1-trgv |(48629, 48942)|2.96640647223|(1.000,1.000,0.970)|1
-GQKSSNLEGITKSVTRPTGSSAEITCDFSGD------SN--FYIHWYLHQEGKVP---Q
RLLYYD-V--SNSRDVLESGLSPGKYYTHT-RTRWSWILI------LR-NLIENDSGVYY
CANWD-----
>V68RF-AQIA01046502.1-trgv |(58146, 58459)|2.93059696049|(0.998,0.982,0.958)|1
-SQKSSNLEGRTKSVTRPTGSSAEITCDLPEV------SS--FYIHWYLHQVGKAP---Q
RLLYYD-T--SNSRVVLESGISPGKYDSYGS-TRNNLRLR------LR-NLIENDSGVYY
CANWD-----
>V70RF-AQIA01048525.1-trbv |(43379, 43692)|2.74461016549|(0.996,0.995,0.843)|1
--SLDTAVSQTPKYLVTQTGKNEYLKCEQNLGH---------DTMYWYKQDSKKLL---K
IMFSYN-N--KQLI---INETVPNRISPDSPD-KAHLNLH------IK-SLELGDSAVYF
CASSQGTALQ
>V71RF-AQIA01048525.1-trbv |(48020, 48317)|2.99899600001|(1.000,1.000,0.999)|1
--PIDSGVTQTPKHLVMGMTNKKSLKCEQHMGH---------RAVYWYKQKVKKPP---E
IMFMYN-Y--EKL---SINESVPSRFSPECSQ-SSLFYLH------LR-ALQPEDSALYL
CASSQ-----
>V72RF-AQIA01048525.1-trbv |(56235, 56535)|2.80419749294|(0.967,0.991,0.879)|1
--HTEPEVTQTPSHQVTQMGQEVILRCVPISNH---------FYFYWYRQILGQKV---E
FLVSFY-N--GKIS--EQSEIFEDQFSVGRSD-GVHFTLK------IK-STKLEDSAMYF
CASSE-----
>V75RF-AQIA01048525.1-trbv |(78854, 79151)|3.0|(1.000,1.000,1.000)|1
--PLDTAVFQTPKYLVTQMGKKESLKCEQNLGH---------DTMYWYKQDSKKLL---K
IMFIYS-N--KEPI---LNETVPNRFSPESLD-KAHLNLH------IK-SVELGDSAVYF
CASSQ-----
>V76RF-AQIA01048525.1-trbv |(83218, 83515)|2.98880001921|(0.999,0.992,0.998)|1
--PTDTGVTQTPKHLVMEMTNKKSLKCEQHMGH---------NAMYWYKQKAKKPP---E
LMFVYQ-Y--EKL---SINESVPSRFSPECSK-SSLLYLH------LR-ALQPEDSALYL
CASSQ-----
>V77RF-AQIA01048525.1-trbv |(94178, 94474)|2.87374611268|(0.995,0.960,0.937)|1
--PVEAGVTQTPRSLIKMRGQQATLSCSPISGH---------RSVYWYQQTPGQGL---Q
FLFEYF-S--ETQR---QKGNFSNRFSGRQFS-NSRSEMN------VS-TLELGDSALYL
CASSL-----
>V78RF-AQIA01048526.1-trbv |(5857, 6154)|3.0|(1.000,1.000,1.000)|1
--PANADVTQSPKFQILKTGQSMTLQCAQDMNH---------NSMYWYRQDPGMGL---R
LIHYSA-T--EDTT---DPGEVPDGYSVSRLN-KKEFLLR------LE-SAALSQTSVYF
CASSE-----
>V79RF-AQIA01048526.1-trbv |(20529, 20842)|2.938150505|(0.988,0.996,0.958)|1
--SLDTAVSQTPKYLVRQTGKNESLKCEQNLGH---------NAMYWYKQDSKKLL---K
IMFIYN-N--KEPI---LNETVPYRFSPKSPD-KAHLNLH------IK-SLELGDSAVYF
CASSQDTALQ
>V80RF-AQIA01048526.1-trbv |(23960, 24257)|2.97322155506|(0.998,1.000,0.977)|1
--PMETGVTQTPRHLVMGMTNKKSLKCEQHLGH---------NAMYWYKQKAKKPP---E
LMFIYN-F--KER---AENNSVPSRFSPECPD-SSHLHLH------LR-ALQPEDSALYL
CASSQ-----
>V81RF-AQIA01048526.1-trbv |(35703, 36000)|2.99899600001|(1.000,1.000,0.999)|1
--PVNAGVTQTPKFQVLKTGQNMTLKCAQDMNH---------DRMYWYRQDPGMGL---R
LIHYSA-G--EGST---EKGEVPNGYNASRLN-KKDFLLR------LE-SAAPSQTSMYF
CASSE-----
>V82RF-AQIA01048527.1-trbv |(3129, 3429)|2.99899600001|(1.000,0.999,1.000)|1
--HTGAGVSQSPRNKVTEEGKDVVLRCDPISGH---------TALYWYRQSLGKGL---E
FLIYFQ-G--NDAP--DKSGLPSGRFSAERTE-GSVSTLK------IQ-RTEQGDSAVYL
CASSL-----
>V83RF-AQIA01048527.1-trbv |(25700, 26000)|2.99085601037|(0.999,0.999,0.993)|1
--HTGAGVSQSPSNKVTEKGKDVELRCDPISGH---------AVLYWYRQNLGQGL---E
FLIYFQ-G--TGAV--DDSGLRSDRVSATRPE-GSVSTLK------IQ-HTEQGDSAMYF
CASSL-----
>V84RF-AQIA01048528.1-trbv |(4386, 4682)|2.98559608|(0.999,0.989,0.998)|1
--SVDTGVTQSPTHLIKTRGQQVTLRCSPISGH---------NTVSWYQQAPGQGP---Q
FIFEYA-N--ELRT---SEGNFPHRFSGRQFR-DYHSEMN------VS-ALELGDSALYL
CASSL-----
>V85RF-AQIA01048528.1-trbv |(7069, 7365)|2.991900005|(0.999,0.999,0.994)|1
--SVDCGVTQTPKHLITAIGQQVTLRCSPRSGD---------RSVYWYQQSLGQGL---Q
FLIQYY-N--GEER---AKGNILERFSAQQFA-DLHSELN------LS-SLELGDSALYF
CASSE-----
>V86RF-AQIA01048529.1-trbv |(2063, 2360)|2.27954862991|(0.925,0.656,0.953)|1
--HRDAEITQSPRHKITETGRKVTLTCHQTWNH---------NNMFWYRQDLGHGL---R
LIHYSY-G--VPDT---NKGEVPDGYSVSRSN-KEDFPLT------LE-SAASSQTSVYF
CASSE-----
>V90RF-AQIA01048530.1-trbv |(44934, 45231)|2.99798400013|(1.000,1.000,0.998)|1
--PVNAGVTQTPKFQVLKTGQSMTLQCAQDMNH---------DYMYWYRQDPGMGL---R
LIHYSV-G--EGST---EKGEVPDGYNVTRSN-TEDFPLR------LE-SAAPSQTSVYF
CASSD-----
>V91RF-AQIA01048530.1-trbv |(49166, 49466)|2.994900005|(1.000,0.995,1.000)|1
--HTGAGVSQSPRYKVTKRGQDVALRCDPISGH---------DYLYWYQQALGQGP---A
FLTYFQ-D--DAQR--DKSGLPNDRFSAERTE-GSVSTLK------IQ-RTEQGDSAVYL
CASSL-----
>V92RF-AQIA01048530.1-trbv |(57090, 57380)|2.86327015267|(0.985,0.989,0.911)|1
----QAGVTQSPTHLIKTRGQQVTLRCSPISGH---------TNVYWYQQALGQGP---Q
FILWYD-E--EEER---DRGTFPHRFSGHQFP-NYSSELN------VN-ALEVEDSALYL
CASSL-----
>V94RF-AQIA01048530.1-trbv |(82295, 82592)|3.0|(1.000,1.000,1.000)|1
--LVNVGVTQTPKFQVLKTGQSMTVQCAQDMNH---------NFMYWYRQDPGMGL---R
LIHYSG-A--AGTT---DKGEVPSGYNVSRLN-TEDFPLR------LE-SADPSQTSVYI
CASSY-----
>V95RF-AQIA01048530.1-trbv |(86912, 87212)|2.994900005|(1.000,0.995,1.000)|1
--HTVARVSQSPRYKVTKRGQDVALRCDPISGH---------ATLYWYQQALGQGP---E
LLTYFS-Y--EAQQ--DKSGLPSDRFSAERPE-GSVSTLK------IQ-RTQQGDSAVYL
CASSL-----
>V96RF-AQIA01048530.1-trbv |(109105, 109405)|2.99798400013|(1.000,0.998,1.000)|1
--HTGAGVSQSPRYKVTERGQDVALRCDPISGH---------DYLYWYQQALGQGP---E
LLTYFN-Y--KAQP--DKSGLPNDRFSAERPE-GSVSTLK------IQ-RTEQRDSAVYL
CASSL-----
>V97RF-AQIA01048530.1-trbv |(114175, 114471)|2.99696400065|(1.000,1.000,0.997)|1
--PVDAGVTQSPTHLIKTRGQQVTLRCSPISGH---------TSVSWYQQALGQGP---Q
LIFEYD-R--KEER---VRGNFPDRFSGRQFP-NYSSELN------VN-ASEMGDSALYL
CASSL-----
>V98RF-AQIA01048530.1-trbv |(120217, 120514)|2.96989600501|(0.988,0.989,0.993)|1
--PGNAGVNQTPKFQVLKTGQSMTLQCAQDMNH---------ECMSWYRQDPGMGL---R
LIHYSV-G--AGIT---DKGEVPNGYNVSRSN-TEDFPLR------LE-SAASSQTSVYF
CGSSD-----
>V99RF-AQIA01048531.1-trbv |(13036, 13336)|2.99798400013|(1.000,0.998,1.000)|1
--HTGAGVSQFPRYRVTKRGQDVTLRCDPISGH---------EYLYWYQQAPGQGP---E
FLTYFQ-N--DAQP--DKSGLPNDRFSAERTE-GSVSTLK------IQ-RTEQGDSAVYL
CASSL-----
>V100RF-AQIA01048531.1-trbv |(21500, 21796)|2.95954165691|(0.999,0.994,0.970)|1
--PVDTGVTQSPTHLIKTRGQQVTLRCSPISGH---------SSVSWYQQALGQGP---Q
FIFEYY-E--KEER---ERGNFPGRFSGHQFP-NYSSELN------VS-ALLLGDSALYL
CASSL-----
>V101RF-AQIA01048532.1-trbv |(3516, 3812)|2.99899600001|(1.000,1.000,0.999)|1
--PVDAGVTQSPTHLIKTRGQQVTLRCSPISGH---------TSVYWYQQALGQGP---Q
FIFQYY-E--KEER---ERGNFPDRFSGHQFP-NYSSELN------VS-ALLLGDSALYL
CASSL-----
>V102RF-AQIA01048532.1-trbv |(10804, 11101)|2.99179201242|(0.994,1.000,0.998)|1
--PVNAGVTQTPKFQVLKTGQSMIVQCAQDMKH---------DYMFWYRQDPGMGL---R
LIYYSV-T--AGIT---TKGEVPNGYNVSRKN-TEDFLLR------LE-SADPSQTSVYI
CASSE-----
>V103RF-AQIA01048532.1-trbv |(15109, 15409)|3.0|(1.000,1.000,1.000)|1
--HTGAGVSQSPRYKVIKKGQDVALRCDPISGH---------AALYWYQQALGQGP---E
FLTYFN-Y--KAQP--DKSGLPNDRFSAERPE-GSVSTLT------IQ-RTEQQDSAVYL
CASSL-----
>V105RF-AQIA01048532.1-trbv |(34644, 34944)|2.99174403277|(1.000,0.992,1.000)|1
--HADAGVSQDPRHKITKTGQNVSFKCVPISEH---------NRLYWYRQTLGQGP---E
FLTYFQ-N--EAQQ--DRSGLFSDRFSAERPE-GSISTLM------IQ-HTEQGDSAVYL
CASSL-----
>V106RF-AQIA01048532.1-trbv |(48704, 49001)|2.99798400013|(1.000,1.000,0.998)|1
--HMDAGITQSPRHKITETGTPVTLRCHQTENH---------RYMYWYRQDLGNGL---R
LIHYSY-G--VEDT---DKVEVSDGYSVSRSK-TEDFLLT------LE-SAPRSQTSVYF
CASSE-----
>V108RF-AQIA01048532.1-trbv |(65345, 65645)|2.98385201038|(0.997,0.991,0.996)|1
--HTDAGVIQSPRHEVTEMGKEVTLRCEPISGH---------SSLFWYRQTMMRGL---E
FLIYFN-N--KSPI--DDSGMPKDRFSATMPD-ASFSTLK------IQ-PSEPRDSAVYF
CASSL-----
>V109RF-AQIA01048532.1-trbv |(68613, 68913)|2.97367205249|(0.994,0.985,0.995)|1
--HTDAGVIQSPRHEVTEMGKEVTLRCEPISGH---------TYLFWYRQTMMRGL---E
FLIYFN-N--KSPI--DDSGMPKDRFSAKMPD-ASFSTLK------IQ-PSEPRDSAVYF
CASSL-----
>V110RF-AQIA01048532.1-trbv |(83967, 84267)|2.99196000066|(0.996,0.999,0.997)|1
--LIDAGVTQTPRHKVTEMGQEVTMRCQPILGH---------NTVFWYRQTVMQGL---E
LLVYLR-N--KASL--DDSGMPKDRFSAEMPD-ASLATLK------IQ-PSEPRDSAVYL
CASGL-----
>V114RF-AQIA01048536.1-trbv |(15427, 15724)|2.99698000014|(1.000,0.998,0.999)|1
--TMDGRITQSPKYLFRKEGQNVTLSCEQNLNH---------DAMYWYRQDPGQGL---R
LIYYSQ-I--VNDI---QKGDIAEGYSVSRER-KESFPLT------VT-SAQRNPTAFYL
CASSI-----
>V115RF-AQIA01048536.1-trbv |(33459, 33759)|2.83038780652|(0.993,0.989,0.890)|1
--STDTKVTQRPRLLVKANKQKAKMDCVPVKGH---------SYVYWYRKKLDEEL---K
FLVYFQ-N--EEII--QKAEIINKRFSAQCPQ-NSSCTLE------IQ-STESGDAALYF
CASSK-----
>V116RF-AQIA01048536.1-trbv |(42435, 42735)|2.90131017975|(0.994,0.985,0.936)|1
--SFHAEVTQTPGYLVKGKGQKTKMDCTPEKGH---------TYVYWYQQNQNKEF---T
FLISFQ-N--EQVL--QETELHKKRFSSQCPK-NLPCSLE------IP-SSEPGDTALYL
CASSQ-----
>V117RF-AQIA01048536.1-trbv |(54577, 54875)|2.92758593645|(0.995,0.999,0.944)|1
--SMDADVTQTPRNKIAKTGKRIMLECSQTKGH---------DQMYWYRQDPGLGL---R
LIYYSF-D--VQDI---NKGEISNGYSVSRQE-QAKFSLS------LE-SATPNQTALYF
CATSD-----
>V118RF-AQIA01048536.1-trbv |(62410, 62707)|2.99398000014|(0.997,0.998,0.999)|1
--LTEADIYQNPRHRVIGTGKKITLECSQTVGH---------DKMYWYQQDPGMEL---H
LIHYSY-G--VNST---ERGDFSSESTVSRLR-IEHFPLT------LE-SASPSHTSQYL
CASSE-----
>V119RF-AQIA01048536.1-trbv |(103279, 103576)|2.90275467319|(0.982,1.000,0.932)|1
--PLEAQVTQNPRYLITVTGKKLTVTCSQNMNH---------EYMSWYRQDPGLGL---R
QIYYSV-N--VEMV---DKGDIPEGYNVSRKE-KRNFPLI------LE-SPSPSQTSLYL
CASSL-----
>V120RF-AQIA01048536.1-trbv |(108616, 108923)|2.99799600001|(0.999,1.000,0.999)|1
--LVDVKVTQSSRYLIKRTGEKVFLECVQDMDH---------ERMFWYRQDPGLGL---R
LIYFSY-D--VKLN---EKGDIPEGYSVSREK-KERFSLI------LG-SASTNQTSMYL
CASSLSTA--
>V121RF-AQIA01048536.1-trbv |(128401, 128704)|3.0|(1.000,1.000,1.000)|1
-SVFSAVVSQKPSRDVCQRGTSVTIQCQVDSQV---------TMMFWYRQQPGQSM---T
LIATANQG--SEAT--YESGFVIDKFPISRPN-LTFSTLT------VS-NTSPEDSSIYL
CSVE------
>V122RF-AQIA01058132.1-igkv |(2776, 3091)|2.98758408012|(1.000,0.998,0.990)|1
-TSGDIVMTQTPLSLPVTPGEPASISCRSSQSLLHS-GGK--TYLYWYLQKPGQSP---Q
LLIHE-------VS--NRASGVPDRFSGSG--SGTDFTLK------IS-RVEAEDVGVYY
CMQGIQLP--
>V123RF-AQIA01058133.1-igkv |(2029, 2329)|3.0|(1.000,1.000,1.000)|1
-ARCDIQMTQSPSSLSASVGDTVTITCRASQGI------S--NDLAWYQQKPGETP---K
LLIYE-------AS--SLQSGIPSRFSGSG--SGTDFTLT------IS-SLQSEDFATYY
CQHYYSTP--
>V125RF-AQIA01064137.1-trav |(6322, 6619)|2.85951574615|(0.965,0.911,1.000)|1
-GLRAQLVTQPEDQVTVAEGNPLTVKCTYSVSG-----N---PYLFWYVQCPNQGL---Q
FLLKYI-T--GDN-----LVKGSYGFEAEFNKSQTSFHLK------KP-SALVSDSALYF
CAVR------
>V126RF-AQIA01064137.1-trav |(37156, 37446)|2.99289600501|(0.999,1.000,0.994)|1
-MSRGEDVEQS-LFLSVREGDISVINCTYTDSS------S--TYLYWYKQEPGAGL---Q
LLTYIL-S--NTD------LKQDQRLTVLLNKKDKHLSLC------IA-DTQTEDSAIYF
CAES------
>V128RF-AQIA01064138.1-trav |(6177, 6471)|2.99899600001|(1.000,0.999,1.000)|1
-GINGDSVVQTEGQVLLSEGDSLIVNCSYESTQ-----Y---PSLFWYVQYPGEGL---Q
LLLKAM-K--FND------KESNKGFEATYRKETTSFHLE------KD-SVQESDSAVYF
CALS------
>V129RF-AQIA01064138.1-trav |(19410, 19703)|3.0|(1.000,1.000,1.000)|1
-GSGKNQVEQSPQSLIILEGKNCTLQCNYTVSP------F--SNLRWYKQDTGKGP---I
SLTIMT-F--SEN------TKSNGRYTATLDADTKQSSLH------IT-AAQLSDSASYI
CVVS------
>V130RF-AQIA01064144.1-trav |(2574, 2880)|3.0|(1.000,1.000,1.000)|1
VWSQQKEVEQDPGPFSVPEGATVTFNCTYSNSA------S--QSFFWYRQDSRKEP---K
LLMSVY-S--S--------GNEDGRFTAQLNRASQYISLL------IR-DSQLSDSATYL
CAVRTQCSP-
>V131RF-AQIA01064144.1-trav |(8015, 8312)|2.99067605248|(1.000,0.991,1.000)|1
-GTRAQSVTQLDSQVSVSEGVPVLLRCNYSSSF-----S---PYLFWYVQYPNQGL---Q
LLLKYT-S--GTT-----LVKGINGFEAEFKKSETSFHLT------KA-SAHVSDAAEYF
CAVN------
>V132RF-AQIA01064146.1-trav |(4210, 4500)|2.99899600001|(1.000,1.000,0.999)|1
--VNGENVEQHPSTLSVQEGDSSVIKCTYSDSA------S--NYFPWYKQELGKGP---Q
FIIDIR-S--NAH------EKKNQRITVLLNKTAKHFSLH------IT-ETQPGDSAVYF
CAAS------
>V133RF-AQIA01064146.1-trav |(26731, 27019)|2.99899600001|(1.000,0.999,1.000)|1
VWS-QQKVEQNSGPLNVPEGAIASLNCTYSDSG------S--QSFFWYRQYSGQSP---E
LLMSTY-S--SGD------K-EDGRFTAQLDRASQYVSLL------IR-DSQLSDSATYL
CAV-------
>V134RF-AQIA01064146.1-trav |(33220, 33517)|2.96458198995|(1.000,0.989,0.978)|1
-GTRAQSVTQLDSQVSVSEGVPVLLRCNYSSSF-----S---PNLFWYVQYPNQGL---Q
LLLKYI-S--GTT-----LVKGINGFEAEFKKSETSFHLT------KA-SAHVSDAAEYF
CAVS------
>V135RF-AQIA01064146.1-trav |(38786, 39083)|2.99593600205|(1.000,1.000,0.996)|1
-TARAQSVTQPDIHITVSEGASLELRCNYSYGA-----T---PSLFWYVQSPGQGL---Q
LLLKYF-S--GDT-----VVQGIKGFEAEFKRSQYSFNLR------KP-SVHWSDAAEYF
CAAG------
>V136RF-AQIA01064146.1-trav |(52629, 52922)|2.98096052424|(1.000,0.998,0.984)|1
-VSRGESVGLHLPTVTVQEGDNSVINCTYSDSA------S--DYFLWYKQESGKGP---Q
SIMDIR-S--NMA------KRQGQRLTVLLNKTMKHLSLQ------IA-ATEPGDSAVYF
CAEN------
>V137RF-AQIA01064146.1-trav |(58513, 58814)|2.94828590752|(1.000,1.000,0.956)|1
-SGIAQKITQTQPAMFVQEKEAVTLDCTYDTSD-----QN--YGLFWYKQPSSGEM---I
FLILQM-S--YDK-----QNATEGRYSLNFQKARKSVNLV------IS-ASQVGDSATYF
CAMR------
>V138RF-AQIA01064146.1-trav |(76833, 77127)|2.99899200002|(0.999,1.000,1.000)|1
-RTRGDSVTQMEGPVTLSERAFLTINCTYTATG-----Y---PSLFWYVQYPGEGP---Q
LLLKAA-K--TDE------KGSNKGFEATYRKETTSFHLK------KD-SVQESDSAVYF
CALS------
>V139RF-AQIA01064146.1-trav |(101455, 101748)|3.0|(1.000,1.000,1.000)|1
VWSQQKEVEQNPGPLSVPEGATASLNCTYSNSA------F--QYFMWYRQYSRKGP---Q
LLIYIY-S--SGN------K-EDGRFTAQVDKSSKYISLF------IR-DSQPSDSATYF
CAMS------
>V140RF-AQIA01064148.1-trav |(10272, 10559)|3.0|(1.000,1.000,1.000)|1
--VNSQQGEEDPQALSIQEGENATMNCSYKTS-------I--NNLQWYRQDSGRSL---V
QLVLIR-S--NER------EKNSGRLRVTLDTSKKSSSLL------IT-ASRAADTASYF
CATD------
>V141RF-AQIA01064149.1-trav |(7521, 7812)|2.99899600001|(1.000,0.999,1.000)|1
-RTNGDSVTQTEGPVTLPERAALTLNCTYQTSY-----S---AFIFWYVQYPNKEP---E
LLLKSS----ENQ------ETNSRGFQASHVKSDSSFHLE------KP-SVQLSDSAVYY
CVLR------
>V142RF-AQIA01064149.1-trav |(10740, 11043)|2.99393200206|(0.999,1.000,0.995)|1
-SSMAQKVTQAQTEISVVEKEDVTLDCVYETRD-----TT--YYLFWYKQPPSGEL---V
FLVRQN-S--FDE-----QNEINGRYYSNFQKSTSSFNLT------IT-ASQVVDSAVYF
CALNE-----
>V143RF-AQIA01064151.1-trav |(18011, 18298)|3.0|(1.000,1.000,1.000)|1
-LSGEDQVTQSPEALSLQEGESSSLNCSYTVSG------L--RGLFWYRQDPGKGP---E
FLFSLY-S--AGE------EKEKERLKATLTKK--ESFLH------IT-GPKPEDSATYL
CAVQ------
>V144RF-AQIA01064151.1-trav |(28358, 28657)|2.69742134017|(0.961,0.833,0.967)|1
-VSSKQEVTQIPAALSVPEGDNLVLNCSFTDSA------I--YNLQWFRQDPGKGL---T
SLLLIQ-S--SQR------EQTSGRLNASLDKSSGRSTLY------IT-ASQPSDSATYL
CAVRHS----
>V145RF-AQIA01064159.1-trav |(7752, 8051)|2.93921501844|(0.991,1.000,0.954)|1
--VNGQQIMQIPQYQHVQEGEDFTTYCNSSTTL---------NNIQWYKQRPGGHP---V
FLITLV-K--SGE------VKKQKRLIFQFGEAKKNSSLH------IT-ATQTTDVGTYF
CAGHSAPQ--
>V146RF-AQIA01064159.1-trav |(18642, 18932)|2.72867031887|(0.973,0.838,0.989)|1
--TIIDAKTTQPTSMDCAEGRAANLPCNHSTIS-----GS--EYIHWYRQIHSQGP---Q
YVIHGL-K--NNETNAMAS------L--IITEDRKSSTLI------LP-HATLRDTAVYY
CIVRV-----
>V147RF-AQIA01064165.1-trav |(18360, 18659)|2.99089600501|(0.999,0.998,0.994)|1
--VNGQQIMQIPQYQHVQEGEDFTTYCNSSTTL---------SNIQWYKQRPGGHP---V
FLIMLV-K--SGE------VKKQKRLTFQSGEAKKNSSLH------IT-ATQTTDVGTYF
CAGHSAPQ--
>V149RF-AQIA01064166.1-trav |(53434, 53721)|2.83835688246|(0.960,0.915,0.972)|1
--VRSQQPVQSPQAVILQEGEDAIINCNSSK-------AL--YSVLWYRQKHGEAP---I
FLMILL-K--GGEQKSHDK------IVATFNEKKQQSSLY------LM-ASQLSYSGTYF
CGAE------
>V151RF-AQIA01064166.1-trav |(99136, 99426)|2.90829798149|(0.987,0.938,0.993)|1
-VSSEDKVMQNPLSLVVHEGDTVTLNCSYEVVN------F--RSLLWYKQEK-KAP---I
FLFTLT-S--SGI------EKKSGRLSSILDKKDLFSILN------IT-ATQTRDSAVYL
CAVE------
>V152RF-AQIA01064166.1-trdv |(135908, 136209)|2.89314485389|(0.998,0.996,0.922)|1
-SGMAQTVTQSQQEMSVQEAETVILSCTYDTSE-----SN--YYLFWYKQPPSRQM---I
LIIRQE-A--YKQ-----QNATENRFSVNFQKAAKSFSLK------IS-DSQLGDAAMYF
CAFM------
>V153RF-AQIA01064166.1-trav |(145402, 145702)|3.0|(1.000,1.000,1.000)|1
-SGMAQTVTQSQPEMSVQEAETVTLSCTYDTSD-----SD--YYLFWYKQPPSRQM---I
LIIRQE-A--YKQ-----QNATENRFSVNFQKATKSFSLK------IS-DSQLGDAAMYF
CAYR------
>V154RF-AQIA01064166.1-trav |(168980, 169268)|3.0|(1.000,1.000,1.000)|1
-LSGELKVGQNPLFLSTQEGKNYTIYCNYSTA-------S--DRLYWYRQDPGKSL---E
SLFVLL-S--NGA------VKQEGRLMASLDTKARLSSLH------IT-AALQDLSATYF
CAV-------
>V156RF-AQIA01075814.1-ighv |(1456, 1765)|3.0|(1.000,1.000,1.000)|1
-VLSQVQLQESG-PGLVKPSETLSLTCAVSGGSI----SG--YYWNWIRQPPGKGL---E
WIGYIGGS--SGST--YYNPSLKSRVTISTDTSKNQFSLK------LS-SVTAADTAVYY
CAR-------
>V157RF-AQIA01075814.1-ighv |(38413, 38722)|2.98574002125|(0.999,0.995,0.992)|1
-AHSQVQLVQSG-AEVKKPGSSVKVSCKASGYTF----TD--YYMHWVRQAPGQGL---E
WMGEINP--KTGGT--NYAQKFQGRVTMTRDTSTSTAYME------LS-SLRSEDTAVYY
CAR-------
>V158RF-AQIA01075814.1-ighv |(41318, 41631)|3.0|(1.000,1.000,1.000)|1
-VQCEVQLVESG-GGLVQPGGSLRLSCAASGFTF----GD--YGMSWVRQAPGKGL---E
WVGRIRNKANSYTT--EYAASVKGRFTISRDDSKNTLYLQ------MS-SLKTEDTAVYY
CT--------
>V159RF-AQIA01075814.1-ighv |(48089, 48398)|3.0|(1.000,1.000,1.000)|1
-VQCEVQLVESG-GGLVQPGGSLRLSCAASGFTF----SS--YDMSWVRQAPGKGL---E
WVSFISN--TGKTI--YYADSVKGRFTISRDNAKNSLSLQ------MS-SLRAEDTAVYY
CTR-------
>V161RF-AQIA01075818.1-ighv |(5347, 5656)|2.86032945957|(0.965,0.917,0.990)|1
-VLSQVQLQESG-PGLVKPSETLPLTCTVSGASI----S--SNYWSWIRQPPGKGL---E
WIGRIYGS-G-GST--DYNPSLKSRVTISIDTSKNQFSLK------LS-SVTAADTAVYY
CAR-------
>V162RF-AQIA01075820.1-ighv |(24543, 24849)|2.99093200206|(0.996,0.995,1.000)|1
-VQCVEQLVESG-GGLVQPGASLRLSCAASEFTF----SS--YDMHWVRQAPGKGL---E
WVSAISI--G-GGT--YYPDSVKGRFTISRDNAKNSLYLQ------MN-SLRAEDTAVYY
CAR-------
>V163RF-AQIA01075821.1-ighv |(6780, 7092)|2.98875601537|(1.000,0.994,0.995)|1
-VLSQVQLQESG-PGLVKPSETLSLTCAVSGGSI----SS-GYYWGWIRQPPGKGL---E
WIGSIYGS--GGSN--YLNPSLKSRVTLSVDTSKNQFSLK------LS-SVTAADTAVYY
CAR-------
>V164RF-AQIA01075823.1-ighv |(9677, 9986)|3.0|(1.000,1.000,1.000)|1
-VQCEVQLVESG-GGLAKPGGSLRLSCAASGFSF----SD--YYMYWVRQAPGKGL---E
WVSGISY--TGGST--YYADSVKGRFTISRENAKNTLYLQ------MD-SLRAEDTAVYY
CAR-------
>V165RF-AQIA01075825.1-ighv |(15487, 15796)|3.0|(1.000,1.000,1.000)|1
-VQCEVQLVESG-GGLVQPGGSLRLSCAASGFTF----SS--YWMYWVRQAPGKGL---E
WVSRISS--DGSST--SYADSVKGRFTISRENAKNSLYLQ------MN-SLRAEDTAVYY
CAK-------
>V166RF-AQIA01075825.1-ighv |(23332, 23647)|3.0|(1.000,1.000,1.000)|1
-VQCEVQLVESG-GGLVQPGGSLRLSCAASGFTF----SS--SAMHWVRQASGKGL---E
WVGRIRSKSNNYET--GYAASVKGRFTISRDDSKNTAYLQ------MN-SLKTEDTAVYY
CTT-------
>V167RF-AQIA01075826.1-ighv |(7442, 7757)|3.0|(1.000,1.000,1.000)|1
-VQCEVQLVESG-GGLVQPGGSLRLSCAASGFTF----SD--YYMSWVRQAPGKGP---E
WVGFIRNKANGGTA--EYAASVKGRFTISRDDSKSIASLQ------MN-SLKTEDTAVYY
CAR-------
>V168RF-AQIA01075827.1-ighv |(12747, 13054)|3.0|(1.000,1.000,1.000)|1
-VQCEVQLAESG-GGLVQPGGSLRLSCAASGFTF----SS--YEMHWVRQAPGKGL---E
SVSVIGG--DSSYT--HYADSVKGRFTISRDNAKNSLSLQ------MN-SLRAEDTAVYY
CA--------
>V169RF-AQIA01075830.1-ighv |(638, 945)|2.9611161971|(0.987,0.998,0.977)|1
-AHSQVQLVQSG-AEVKQPGASVKVSCKASGYTF----TS--YGMNWLRQAPGQRL---E
WMGGINT--NTGNP--TYAQGFKERFTFSMDTSISTAYLQ------IS-SLKAEDTAVYY
CA--------
>V170RF-AQIA01075832.1-ighv |(13782, 14094)|3.0|(1.000,1.000,1.000)|1
-VLSQVQLQESG-PGLVKPSETLSLTCAVSGGSI----SS-GYYWSWIRQPPGKGL---E
WIGYIYGS--SGST--YYNPSLKSRVTISKDTSKNQFSLK------LS-SVTAADTAVYY
CAR-------
>V171RF-AQIA01075832.1-ighv |(26831, 27140)|3.0|(1.000,1.000,1.000)|1
-VQCEVQLVESG-GGLAKPGGSLRLSCAASGFTF----SS--YWMYWVRQAPGKGL---E
WISAISS--GGGST--YYADSVKGRFTISRDNSKNTLSLQ------MN-SLRAEDTAVYY
CAK-------
>V172RF-AQIA01075832.1-ighv |(39067, 39376)|2.99899200002|(0.999,1.000,1.000)|1
-VQCDVQLVESG-GGLVKPGGSLRLSCVASGFTF----SS--YVMHWVRQAPGKGL---E
WVSVISES--GGTI--YYADSVKGRFTISRDNAKNSLFLQ------MN-SLRAEDTAVYY
CTR-------
>V173RF-AQIA01075832.1-ighv |(43031, 43343)|2.95487920684|(0.970,0.991,0.999)|1
-VLSQVQLQESG-PGLVKPSETLSLTCAVSGYSI----SS-GYYWGWIRQPPGKGL---E
YIGYISGS--SGST--YYNPSLKSRVTISKDTSKNQFSLK------LS-SVTAADTAVYY
CAR-------
>V174RF-AQIA01075834.1-ighv |(701, 1011)|2.97909640489|(0.998,0.999,0.983)|1
-VLSQVQLQESG-PGLVKPSETLSLTCAVSGGSI----SS-SNWWSWIRQSPGKGL---E
WIGGIYGS-G-GST--EYNPSLKSRVTISIDTSKNQFSLK------LS-SVTAADTAVYY
CA--------
>V175RF-AQIA01075834.1-ighv |(15808, 16117)|3.0|(1.000,1.000,1.000)|1
-VLSQVQLQESG-PGLVKPSETLSLTCAVSGGSI----S--GYYWSWIRQSPGKGL---E
WIGYIYGS--GSST--NYNPSLKSRVTISKDTSKNQFSLK------LS-SVTAADTAVYY
CAR-------
>V176RF-AQIA01075844.1-ighv |(4662, 4971)|3.0|(1.000,1.000,1.000)|1
-VLSQVQLQESG-PGLVKPSETLSLTCAVSGGSI----SS--NYWSWIRQPPGKGL---E
WIGNIDGN--TADT--NYNPSLKSRVTISKDTSKNQFSLK------LS-SVTAADTAVYY
CAR-------
>V177RF-AQIA01075848.1-ighv |(16337, 16646)|2.78846330217|(0.977,0.865,0.997)|1
-AQSQVQLVQSG-AEVKKPGASVKLSCKASGYTF----TS--YYINWVRQAPEQVL---D
WMGWINP--SNGNT--GYAQKFQGRVTMTRDTSTSTAYME------LN-SLRSEDTAVYY
CAR-------
>V178RF-AQIA01075848.1-ighv |(34897, 35206)|2.95890837717|(0.998,0.999,0.966)|1
-AQSQVQLVQSG-AEVKKPGASVKVSCKASGFTF----GS--YAISWVRQAPGQGL---E
WMGGIIP--LVGIT--NYAEKFQGRVTITADTSTSTAYME------LS-SLRSEDTAVYY
CAR-------
>V179RF-AQIA01075855.1-ighv |(3762, 4071)|2.99798400013|(1.000,1.000,0.998)|1
-VLSQVQLQESG-PGLVKPSETLSLTCAVSGGSI----S--SNYWSWIRQPPGKGL---E
WIGYIYGS--GSST--NYNPSLKSRVTLSVDTSKNQLSLK------LS-SVTAADTAVYY
CAR-------
>V180RF-AQIA01075856.1-ighv |(13880, 14195)|2.99899600001|(1.000,0.999,1.000)|1
-VLSQVQLQESG-PGLVKPSETLSLTCAVSGGSI----SGGYYYWSWIRQPPGKGL---E
WIGNIYGN--SAST--YYNPSLKSRVTISKDTSKNQFSLK------LS-SVTAADTAVYY
CAR-------
>V181RF-AQIA01075857.1-ighv |(5233, 5548)|2.99174403277|(1.000,0.992,1.000)|1
-VLSQVQLQESG-PGVVKPSETLSLTCAVSGGSI----SSGYYYWSWIRQPPGKGL---E
WIGGIYSN--SEST--NYNPSLKSRVTISKDTSKNQFSLK------LS-SVTAADTAVYY
CAR-------
>V182RF-AQIA01075859.1-ighv |(15555, 15867)|3.0|(1.000,1.000,1.000)|1
-VLSQVQLQESG-PGLVKPSETLSLTCAVSGGSI----SD-SYWWSWIRQPPGKGL---E
WIGYIYGS--STST--NYNPSLKSRVTISKDTSKNQFSLK------LS-SVTAADTAVYY
CAR-------
>V183RF-AQIA01075860.1-ighv |(3491, 3803)|3.0|(1.000,1.000,1.000)|1
-VLSQVQLQESG-PGLVKPSETLSLTCAVSGGSI----SS-SNWWSWIRQPPGKGL---E
WIGNIGGS-S-GST--YYNPSLKSRVTISKDTSKNQFSLK------LS-SVTAADTAVYY
CAR-------
>V184RF-AQIA01075862.1-ighv |(11827, 12136)|3.0|(1.000,1.000,1.000)|1
-VQCEVQLVESG-GGLAKPGGSLRLSCAASGFTF----SD--YYMHWVRQASGKGL---E
WVSSISNG--GGST--WYADSVKGRFTISRENAKNTLYLQ------MD-GLRAEDTAVYY
CAR-------
>V186RF-AQIA01075862.1-ighv |(23165, 23477)|2.989900005|(0.995,1.000,0.995)|1
-VLSQVQLQESG-PGLVKPSETLSLTCAVSGGSI----SS-SNWWSWIRQPPGKGL---E
WIGRISGS-G-GST--SYNPSLKSRVTISKDTSKNQFSLK------LS-SVTAADTAVYY
CAR-------
>V187RF-AQIA01075862.1-ighv |(31521, 31830)|2.89272090161|(0.999,1.000,0.919)|1
-VQCEVQLVESG-GGLVQPGGSLRLSCAASGFTF----SS--YGMHWVCQAPGKGL---E
WVAVISYD--GSQK--YYADSVKDRFTISRDNSNNMLYLQ------MN-NLKLEDTAVYY
CAT-------
>V188RF-AQIA01075862.1-ighv |(73169, 73478)|2.97810021834|(1.000,0.991,0.988)|1
-VQCEVQLVESG-GGLVQPGASLRLSCAASGFTF----SS--TRMNWIRQAPGKRL---E
WVTDIKY--DGSEK--YYVDSVKGRFTISRDNAKNSLYLQ------MN-SLRAEDTAVYY
CVR-------
>V189RF-AQIA01075862.1-ighv |(80457, 80766)|2.93003383388|(0.996,0.998,0.946)|1
-VCAEVQLVQSG-AEVKRPGESLRISCKTSGYSF----TS--SWISWVRQMPGKGL---E
WMGSIYP--GDSDT--RYNPSFQGHVTISADKSISTTYLQ------WS-SLKASDTATYY
CAK-------
>V190RF-AQIA01075865.1-ighv |(14324, 14639)|3.0|(1.000,1.000,1.000)|1
-VQCEVQLVESG-GALAQPGGSLRLSCAASGFTF----SD--YYMDWVHQAPGKGL---E
WVGRIRNKANSYTT--EYAASVKGRFTISRDDSKNTLYLQ------MS-SLKTEDTAVYY
CAR-------
>V191RF-AQIA01075867.1-ighv |(12905, 13214)|2.4883391487|(0.989,1.000,0.732)|1
-VQCEVQLVESG-GGLAKPGGSLRLSCAASGFSF----SD--YYMYWVRQAPGKGL---E
WVSSISG--SSSST--YYPDSVKGRFTISRDNAKNTLYLQ------MN-SPRAEDTAVYY
CAR-------
>V192RF-AQIA01075867.1-ighv |(22147, 22453)|2.99899600001|(1.000,0.999,1.000)|1
-VQCEVQLVESG-GGLVQPGGSLRLSCG---FTF----SD--HYMSWVRQAPGKGP---E
WVGFMRNKANGGTT--EYATSVKGRFTISRGDSKSIASLQ------MS-SLKTEDTAVYY
CAR-------
>V193RF-AQIA01075868.1-ighv |(2740, 3049)|3.0|(1.000,1.000,1.000)|1
-VQCEVKLVESG-GGLVQPGGSLRLSCAASGFTF----SN--YWMFWVRQAPGKGL---E
WVSSISG--SSSST--YYPDSVKGRFTISRDNAKNTLYLQ------MN-SLRAEDTAVYY
CAR-------
>V194RF-AQIA01075868.1-ighv |(14808, 15114)|2.91114025044|(1.000,0.933,0.996)|1
-VQCEVQLVESG-GGLVQPGGSLRLSCAASGFTS----GN--SDLIWIRQAPGKGL---E
WVSYISS---GGSI--YYSDSVKGRFTISRDNAKNTLYLQ------MS-SLRVEDTAVYY
CAK-------
>V196RF-AQIA01007908.1-igkv |(8863, 9163)|3.0|(1.000,1.000,1.000)|-1
-ARCDIQMTQSPSSQSASVGDRVTITCQASQSL------S--NYLNWYQQKPGKIP---K
LLIYR-------AS--SLQSGIPSRFSGSG--SGTDFTLT------IS-SLQPEDFATYY
CQQGYSYP--
>V197RF-AQIA01017094.1-igkv |(128027, 128344)|2.2895986353|(0.952,0.675,0.929)|-1
-TSGAIPLTQTPLSLPVTPGEPASISCRSSQSLLHS-NGN--TYLHWYLQKPGQSP---Q
LLIYE-------VS--NRASGVPERFSGSG--SDTDFTLK------IN-LVEAEDVGVYY
CMQTTQCPP-
>V198RF-AQIA01017094.1-igkv |(132911, 133229)|2.96363465422|(0.998,0.974,0.994)|-1
-STGDIVMTQTPLSLPVTLGEPASISCRSSQSLLDSEDGN--TYLDWYLQKPGQSP---Q
LLIYE-------VS--NRASGVPDRFSGSG--SDTDFTLK------IS-RVEAEDVGVYY
CMQGIEYP--
>V199RF-AQIA01017118.1-igkv |(14570, 14870)|3.0|(1.000,1.000,1.000)|-1
-ARCDIQMTQSPSSLSASVGDRVTITCRASQGI------N--NYLSWYQQKPGKAP---K
PLIYY-------AS--SLETGVPSRFSGSG--SGTDYTLT------IS-SLQPEDIATYY
CQQYNNSP--
>V200RF-AQIA01017118.1-igkv |(20337, 20639)|2.99899200002|(0.999,1.000,1.000)|-1
-SSGDVVMTQSPLSLPITPGQPASISCRSSQSLVHS-DGK--TYLNWLQQKPGQPP---R
RLIYQ-------VS--NRDSGVPDRFSGSG--AGTDFTLK------IS-RVEAEDVGVYY
CMQG------
>V201RF-AQIA01017118.1-igkv |(36827, 37129)|2.96486491212|(0.999,0.998,0.971)|-1
-SSGDVVMTQSPLSLPITPGQPASISCRSSQSLVHS-NGN--TYLSWYQQKPGQPP---R
LLIYQ-------VS--NRDSGVPDRFSGSG--AGTDFTLK------IS-RVEAEDVGVYY
CGQG------
>V202RF-AQIA01017118.1-igkv |(47001, 47316)|2.9803601679|(0.999,0.995,0.987)|-1
-SGGDIVMTQTPLSLPVTPGEPASISCRSSQSLLHT-DGY--TYLDWYLQKPGQSP---Q
LLIYG-------GS--NRASGVPDRFSGSG--SGTDFTLK------IS-KVEAEDVGVYY
CMQHKALP--
>V203RF-AQIA01017118.1-igkv |(71244, 71559)|2.96764165191|(1.000,0.971,1.000)|-1
-SSGDIVMTQTPLSLPVTLGEPASISCRSSQSLLSS-NGY--NYLNWYLQKPGQSP---Q
LLIYY-------GS--NRASGVPDRFSGSG--SGTDFTLK------IS-RVEAEDVGVYY
CMQALQTP--
>V204RF-AQIA01017118.1-igkv |(79515, 79815)|2.95437067436|(0.997,0.999,0.963)|-1
-TRCAIQMTQSPSSLSASVGDTVTITCRASQSI------G--SNLAWYQQKPGKVP---K
LLIYA-------AS--TLQSEVPSRFSGSG--SGTDFTLT------IS-SLQPEEVATYY
CQKCDSAP--
>V205RF-AQIA01017118.1-igkv |(115261, 115563)|2.97578054332|(1.000,0.984,0.993)|-1
-STGDVVMTQSPLSLPVTLGQPASISCRSSQSLLHS-NGN--TYLSWFQQKPGQSP---R
RLIYK-------VS--NRDSGVPDRFSGSG--AGTDFTLK------IS-RVEAEDVGVYY
CMEG------
>V206RF-AQIA01017118.1-igkv |(131697, 131995)|2.86230853561|(0.999,0.901,1.000)|-1
-SKGEIVLTQSPAFQSVTLKEKVTITCQASQSIG--------SSLHWYQQKPDQSP---K
LLIKY-------AS--QSISGVPSRFSGSG--SGTDFTLT------IN-SLEAEDAATYY
CQQSSSF---
>V207RF-AQIA01017118.1-igkv |(160930, 161230)|2.99385601037|(1.000,0.994,1.000)|-1
-TTGQVVLTQSPATLSLSPGERATLSCRASQSVS--------SSLAWYQQKPGQAP---R
LLIYG-------AS--SRATGIPDRFSGSG--SGTEFTLT------IS-SLEPEDFAVYY
CQKYSSSP--
>V208RF-AQIA01017118.1-igkv |(166412, 166712)|3.0|(1.000,1.000,1.000)|-1
-VRCDIQMTQAPSFLSASVGDRVTITCQASQSI------S--NDLAWYQQKPGKSP---T
LLIYD-------AT--NLHTGVPSRFSGSG--SGADYSLT------IS-SLELEDFAAYY
CQQEYSYP--
>V209RF-AQIA01017120.1-igkv |(6524, 6816)|2.85365853484|(1.000,0.896,1.000)|-1
-SRGDIVMTQSPAFVSVTPGEKVTITCQASEGIS--------NYLHWYQQKPDQAP---K
LFIQY-------AS--QSISGVPSRFTGSG--SGTDFTFT------IS-SLEVEDAATYY
CQQGN-----
>V210RF-AQIA01017120.1-igkv |(22790, 23081)|2.99899600001|(1.000,1.000,0.999)|-1
----DIQMTQSPSSLSASVGDTVTITCRASQSF------S--SSLAWYQQKPGKAP---K
LLIYS-------AS--SLQSGVPSRFSGSK--SGTDFTLT------IS-SLQPEDIASYY
CQQYYSYP--
>V211RF-AQIA01017120.1-igkv |(38344, 38636)|3.0|(1.000,1.000,1.000)|-1
-AKCDIQMTQSPSSLSASVGDRVTITCRASQTI------S--SYLAWYQQKPGKVP---K
LLIYA-------AS--SLESGVPSRFSGSG--SGTEFTLT------IS-SLQPEDFATYY
CQQHN-----
>V212RF-AQIA01017120.1-igkv |(57654, 57954)|2.99696400065|(1.000,1.000,0.997)|-1
-ARCDIQMTQSPSSLSASVGDRVTITCRASQGI------S--TYLNWYQQKPGKAP---K
LLIYA-------AS--SLQSGVPSRFSGSG--SGTEFTLT------IS-SLQPEDFATYY
CLQYNSKP--
>V213RF-AQIA01017120.1-igkv |(72400, 72698)|2.99798400013|(1.000,1.000,0.998)|-1
-TTGEIVMTQSPATLSLSPGERATLSCRASQSVS--------SSLAWYQQKPGQAP---R
LLIYG-------AS--SRATGIPDRFSGSG--SGTEFTLT------IS-SLEPEDFAVYY
CQQYSNW---
>V214RF-AQIA01017120.1-igkv |(84992, 85292)|2.99696400065|(1.000,1.000,0.997)|-1
-ARCDIQMTQSPSSLSASVGDRVTITCRASQGI------S--NYLNWYQQKPGKAP---K
LLIYA-------AS--SLQSGVPSRFSGSG--SGTEFTLT------IS-SLQPEDFATYY
CQPFKNYL--
>V215RF-AQIA01017122.1-igkv |(11088, 11376)|2.70545458293|(0.861,0.972,0.956)|-1
-----IVMTQSPATLSLSPGETATLSCRASQSVG--------SYLAWYQQKPGQAP---K
LLVHS-------AY--FRATGIPDRFSGSG--SRTEFTLT------IS-SLEPEDVGVYH
CQQYNDLL--
>V216RF-AQIA01017123.1-igkv |(8475, 8775)|3.0|(1.000,1.000,1.000)|-1
-ARCDIQLTQSPSSLSASVGDRVTITCRASQGI------S--SYLAWYQQKPGKAP---K
LLIYK-------AS--TLQSGVPSRFSGSG--SGTDFTLT------IS-SLQPEDFAVYY
CQQRNSYP--
>V217RF-AQIA01017123.1-igkv |(15101, 15401)|3.0|(1.000,1.000,1.000)|-1
-AKCDIQMTQSPSSLSASVGDRVTITCRASQGI------S--SYLAWYQQKPGKAP---K
PLIYY-------AS--NLESGVPSRFSGSG--SGTEFTLT------IS-SLQPEDFATYY
CQQYNSDP--
>V218RF-AQIA01017123.1-igkv |(32082, 32382)|2.98742416586|(1.000,1.000,0.988)|-1
-ARCDIQMTQSPSSLSASVGDRVTITCRASQGI------S--NYLSWYQQKPGKAP---K
LLIYA-------AS--SLQSGVPSRFSGSG--SGTEFTLT------IS-SLQPEDFATYY
CLQGYSTP--
>V219RF-AQIA01017123.1-igkv |(42629, 42935)|2.99899200002|(0.999,1.000,1.000)|-1
-----TVMTQSPATLSLSPGERATLSCRASQSVS--------SSLAWYQQKPGQAP---R
LLIYY-------AS--SRATGIPDRFSGSG--SGTEFTLTISSTLTIS-SLDPEDVGVYY
CQKYNDWP--
>V220RF-AQIA01017125.1-igkv |(705, 1005)|3.0|(1.000,1.000,1.000)|-1
-ARCDIQLTQSPSSLSASVGDRVTITCRASQGI------S--SYLAWYQQKPGKAP---K
LLIYA-------AS--NLQSGVPSRFSGSG--SGTDFTLT------IS-SLQPEDFAVYY
CQQRNSYP--
>V221RF-AQIA01017126.1-igkv |(2367, 2667)|2.99798400013|(1.000,1.000,0.998)|-1
-ARCDIQMTQSPSSLSASVGDRVTITCRASQGI------S--SYLNWYQQKPGKAP---K
LLIYY-------AN--SLASGVPSRFSGSG--SGTDYTLT------IS-SLQPEDFATYY
CQQGNSNP--
>V222RF-AQIA01017126.1-igkv |(20855, 21155)|2.99899600001|(1.000,0.999,1.000)|-1
-TTGEIVMTQSPATLSLSPGETATISCRTSQSVS--------SYLAWYQQKPGQAP---R
LLIYG-------AS--SRATGIPDRFSGSG--SGTDFTLT------IS-SLEPEDFAVYY
CQETSNLS--
>V223RF-AQIA01017128.1-igkv |(28886, 29186)|2.99899600001|(1.000,0.999,1.000)|-1
-ARCDIQMTQSPSSLSASVGDTVTITCRASQGI------S--SYLNWFQQKPGKAP---K
LLIYA-------AS--SLESGVPSRFSGSG--SGTEFTLT------IS-SLQPEDFATYY
CLQYNSYP--
>V224RF-AQIA01017128.1-igkv |(35341, 35641)|2.84170644025|(0.977,1.000,0.894)|-1
-ARCDIQMTQSPSSLSASVGDRVTITCQASQGI------S--SWLAWYQQKPGKAP---K
LLLYK-------AP--GLQSGVPSMFSGSG--SGTEFTLT------IS-SLQPEYFATYY
CQQFSSAL--
>V225RF-AQIA01017128.1-igkv |(51771, 52071)|3.0|(1.000,1.000,1.000)|-1
-TTGEIVMTQSPATLSLSPGERATLSCRASQSVS--------SRLAWYQQKPGQAP---R
LLIYG-------AS--SRATGIPDRFSGSG--SGTEFTLT------IS-SLEPEDVGVYY
CQQDYSWP--
>V226RF-AQIA01017128.1-igkv |(94686, 94986)|3.0|(1.000,1.000,1.000)|-1
-ARCDIQMTQSPSSLSASVGDRVTITCRASQGI------S--SYLAWYQQKPGKAP---K
LLIYD-------AS--NLQSGVPSRFSGSG--SGTDFTLT------IS-SLQPEDFATYY
CQQHNSYP--
>V227RF-AQIA01017128.1-igkv |(113498, 113796)|2.97369865217|(1.000,1.000,0.976)|-1
-TTGEIVMTQSPATLSLSPGERATLSCRASQSVS--------SSLAWYQQKPGQAP---R
LLIYG-------AS--SRATGIPDRFSGSG--SGTDFTLT------IS-SLEPEDVAVYY
CLQRSNW---
>V228RF-AQIA01017130.1-igkv |(1559, 1859)|2.99899600001|(1.000,1.000,0.999)|-1
-ARCDIQMTQSPSSLSASVGDKVTITCHASQGI------S--SWLAWYQQKPGKAP---K
PLIYK-------AS--SLQSGVPSRFSGSG--SGTDYTLT------IS-SLQPEDFATYY
CQQYDNLP--
>V229RF-AQIA01017133.1-igkv |(667, 967)|3.0|(1.000,1.000,1.000)|-1
-ARCDIQMTQSPSSLSASVGDKVTITCHASQGI------S--SWLAWYQQKPGKAP---K
PLIYK-------AS--SLQSGVPSRFSGSG--SGTDFTLT------IS-SLQPEDFATYY
CQQYSSYP--
>V230RF-AQIA01017135.1-igkv |(10903, 11203)|2.99899600001|(1.000,0.999,1.000)|-1
-AKCDIQMTQSPSSLSASVGDKVTITCQASQSI------S--SWLAWYQQKPGKAP---K
PLIYK-------AS--SLESGVPSRFSGSG--SGTDFTLT------IS-SLQPEDFATYY
CQQHNSYP--
>V231RF-AQIA01017135.1-igkv |(26554, 26853)|2.997|(0.999,0.999,0.999)|-1
-TTGETVMTQSPATLSLSPGERATLSCRASQSVG--------STLAWYQQKPGQAP---R
LLIYG-------AS--SRATGIPDRFSGSG--SGTEFTLT------IS-SLEPEDVGVYY
CQQESNWK--
>V232RF-AQIA01017139.1-igkv |(38517, 38829)|2.99596800026|(1.000,0.998,0.998)|-1
-CNGDIVLTQSPASLAVSPGQRATITCRASESVSFFG--I--NLIHWYQQKPGQPP---K
LLIYQ-------AS--NKDTGVPARFSGSG--SGTDFTLT------IN-PVEADDAADYY
CLQSKNSP--
>V233RF-AQIA01017139.1-igkv |(56358, 56649)|2.85641275851|(0.989,0.999,0.900)|-1
-----IVLTQSPTSMAVSQGERVTISCTASSSVS-----T--SYLHWYQQKPGFPP---R
LLVYR-------TS--SLASGVPARFSGSG--SGTSYTLT------IS-SMEAEDAANYY
CQQAHSIP--
>V235RF-AQIA01066360.1-ighv |(8136, 8449)|2.96764165191|(1.000,1.000,0.971)|-1
-VQCEVQLVESG-GGLVQPGGSLRLSCAASGFTF----SN--YYMHWVRQAQGKGL---E
WVGLIRNKANSYTT--EYAAAVKGRFTISRDDSKNTLYLQ------MS-SLKTEDTALYY
CT--------
>V236RF-AQIA01066360.1-ighv |(18228, 18531)|2.26158356754|(0.985,0.646,1.000)|-1
-VQCEVQLAESG-GGLVQPGRSLRPSCAASGFTF----SS--YGMHWVRQAPEEGL---E
WVSYIGS--S--TM--YYADSVKGRFTISRDNAKNSLYLQ------MN-SLRAEDTAVYY
CVR-------
>V237RF-AQIA01066360.1-ighv |(57288, 57597)|2.98998400013|(0.996,0.996,0.998)|-1
-VQCEVQLVESG-GGLVQPGGSLRLSCTGSGFTF----SS--YYMYWIRQAPGKGL---Q
WVSAINT--GGGST--WYTDSVKGRFTISKENAKNTLYLQ------MD-SLRAEDTAVYY
CAK-------
>V238RF-AQIA01066362.1-ighv |(1746, 2054)|2.97020015998|(0.997,0.987,0.987)|-1
-VQGEVQLVESE-GNFVQPGGSLRLSCAASGFTF----SS--CDLDWIRHAPGKGL---E
WVSGISI---AGST--YYANSVKGRFAISRGNAKNTLYLQ------MY-SLIAEDTAIYY
CVSE------
>V239RF-AQIA01066362.1-ighv |(12791, 13106)|3.0|(1.000,1.000,1.000)|-1
-VQCEVQLVESG-GGLVQPGGSLRLSCAASGFTF----SN--YWMSWVRQAPGKGL---E
WVGFIKNKADGGTA--AYAESVKGRFTISRDDSKNTLYLQ------MN-SLKTEDTAVYY
CTR-------
>V240RF-AQIA01066366.1-ighv |(294, 607)|3.0|(1.000,1.000,1.000)|-1
-VQCEVQLVESG-GGLVQPGGSLRLSCAASGFTF----SN--YWMSWVRQAPGKGL---E
WVGFIKNKADGGTA--DYAASVKGRFTISRDDSKNTLYLQ------MS-SLKTEDTAVYY
CT--------
>V241RF-AQIA01066369.1-ighv |(10385, 10694)|2.98551611711|(0.999,0.999,0.988)|-1
-VCAEVQLVQSG-AEVKRPGESLKISCKTSGYSF----TS--YWISWVRQMPGKGL---E
WMGAIDP--SDSDT--RYSPSFQGQVTISADKSISTAYLQ------WS-SLKASDSATYY
CAK-------
>V242RF-AQIA01066369.1-ighv |(30516, 30824)|2.97020015998|(0.997,0.987,0.987)|-1
-VQGEVQLVESE-GNFVQPGGSLRLSCAASGFTF----SS--CDLDWIRHAPGKGL---E
WVSGISI---AGST--YYANSVKGRFAISRGNAKNTLYLQ------MY-SLIAEDTAIYY
CVSE------
>V243RF-AQIA01066378.1-ighv |(784, 1093)|2.99293600205|(0.999,0.995,0.999)|-1
-VQGEVQLVESG-GGLAKPGGSLRLSCAASGFTF----SS--YWMHWVRQAPGKGL---E
WISAINS--AGSST--YYADSVKGRFTISRENAKNTLYLQ------MD-GLRAEDTAVYY
CAG-------
>V244RF-AQIA01066385.1-ighv |(742, 1051)|2.95648712253|(0.994,0.996,0.969)|-1
-AHSEVQLVQSG-AELKKPGASVKVSCKVSGYTF----TE--LSMHWVRQVPGKGL---E
WMGGVDP--VYGEI--IHAEKFQGRVTMTEDTSTDTAYME------LS-SLRSEDTAVYY
CAR-------
>V245RF-AQIA01066385.1-ighv |(14117, 14432)|3.0|(1.000,1.000,1.000)|-1
-VQCEVQLVESG-GGLVQPGGSLRLSCAASGFTF----SD--YAMDWVRQAPGKGL---E
WVGFIRSKAYGGTA--EYAASVKGRFTISRDDSKNTAYLQ------MS-SLKTEDTAVYY
CTR-------
>V246RF-AQIA01066387.1-ighv |(6564, 6873)|3.0|(1.000,1.000,1.000)|-1
-VQCEVQLVESG-GGLVQPGGSLRLSCAASGFTF----GD--YGMHWVRQAPGKGL---E
WVSSISN--TGKTI--YYADSVKGRFTVSRDNAKNSLSLQ------MS-SLRAEDTAVYY
CTR-------
>V247RF-AQIA01066387.1-ighv |(11668, 11974)|3.0|(1.000,1.000,1.000)|-1
-VQCEVQLVESG-GGLVQPGGSLRLSCAASGFTF----SS--YGMSWVRQAPGKGL---E
WVSAISS--GG-ST--YYADSVKGRFTISRDNSKNTLSLQ------MN-SLRAEDTAVYY
CAK-------
>V248RF-AQIA01066387.1-ighv |(59837, 60146)|2.99899200002|(0.999,1.000,1.000)|-1
-AHSQVQLVQSG-AEIKQPGASVKLSCKASGYTF----TS--YYMHWVRQAPGQGL---E
WIGLISP--YNGNK--GYAQNFQGRVTITTDTSTSTGYME------LS-SLRSEDTAVYY
CTR-------
>V249RF-AQIA01066387.1-ighv |(66519, 66828)|3.0|(1.000,1.000,1.000)|-1
-VQCEVQLVESG-GGLAKPGGSLRLSCAASGFTF----SD--YYMDWVRQAPGKGL---E
WVSRISN--GGGST--WYADSVKGRFTISRENAKNTLYLQ------MN-SLRAEDTAVYY
CAR-------
>V251RF-AQIA01066387.1-ighv |(87163, 87466)|2.99696400065|(1.000,1.000,0.997)|-1
-VQCEVQLAESG-GGLVQPGGSLRLSCAASGFTI----SS--YWMSWVCQAPGKGL---E
WLSDIYG--S--TM--YYGDSVKGLFTVSRDNAKNSLYLQ------MN-SLRAEDTAVYY
CTR-------
>V252RF-AQIA01066387.1-ighv |(93938, 94252)|2.89060724756|(0.998,0.923,0.992)|-1
-VLSQVTLKESG-PALVKPTQTLTLTCTFSGFSL----TTSGMGVGWIRQPPGKAL---E
WLASIYW---DDDK--YYSTSLKSRLTISKDTSKNQVVLT------MT-NMDPVDTATYY
CARR------
>V253RF-AQIA01066387.1-ighv |(108611, 108920)|2.99499600001|(0.998,0.998,0.999)|-1
-VLSQLQLQESG-PGLVKPSETLSLTCAVSGGSI----S--SNYWSWIRQPPGKGL---E
WIGRISGS-G-GST--DYNPSLKSRVTISTDTSKNQFSLK------LS-SVTAADTAVYY
CAR-------
>V254RF-AQIA01066395.1-ighv |(6190, 6505)|2.95970803341|(0.983,0.991,0.986)|-1
-VQCEVQLVESG-GGLVQPGGSLRPSCAASGFTF----SS--SAMHWVRQASGKGL---E
WVGRIRSKSNNYAT--EYAASVKGRFTISRDDSKNTACLQ------MS-SLKTEDTAVYY
CAR-------
>V255RF-AQIA01066395.1-ighv |(16120, 16435)|3.0|(1.000,1.000,1.000)|-1
-VQCEVQLVESG-GGLVQPGGSLRLSCAASGFTF----SD--HYMFWVRQAPGKGL---E
WVGFIRSKAYGGTA--EYAASVKGRFTISRDDSKSIAYLQ------MS-SLKTEDTAVYY
CTR-------
>V256RF-AQIA01066397.1-ighv |(6540, 6849)|2.98521630725|(1.000,1.000,0.986)|-1
-AHSQVQLVQSG-PEVKQPGASVKVSCKASGYSF----TT--YGMNWVRQAPGQGL---E
WMGWMNT--YTGNP--TYAQGFTERFVFSMDTSVSTVYLQ------IS-SLKGEDTAVYY
CAR-------
>V257RF-AQIA01066397.1-ighv |(62192, 62507)|2.99899600001|(1.000,0.999,1.000)|-1
-VQCEVQLVESG-GGLVQPGGSLRLSCAASGFTF----SN--HYMYWVRQAPGKGL---E
WVGFIRSKAYGGTA--EYAASVKGRFTISRDDSKNTAYLQ------MS-SLKTEDTAVYY
CTR-------
>V258RF-AQIA01073275.1-ighv |(1217, 1526)|2.99494800078|(1.000,0.998,0.997)|-1
-DHSEVQLVQSG-AEVKKPGASVKISCKASGYTF----TD--YYLHWVRQAPGKGL---E
WMGRVDP--EDGEA--DYAQKFQDRVTITADTSTDTAYME------LS-SLRSEDTAVYY
CAT-------
>V259RF-AQIA01073275.1-ighv |(9357, 9667)|2.99798400013|(1.000,1.000,0.998)|-1
-VQCEVQLVESG-GGLVQPGGSLRLSCVASGFTF----SD--HYMDWVRQAPGKGL---E
WVSSISTG-SGSTT--LYPDSVKGRFTISRDNAKNTVYLQ------MN-SLRAEDTAVYY
CA--------
>V260RF-AQIA01075132.1-igkv |(288, 575)|3.0|(1.000,1.000,1.000)|-1
-----TVMTQSPATLSLSPGERATLSCRASQSVG--------SNLAWYQQKPGQAP---R
LLIYD-------AS--SRATGIPDRFSGSG--SGTEFTLT------IS-SLEPEDVGVYY
CQQYNNWN--
>V0RF-AGCE01061995.1-trbv |(4895, 5202)|2.94828667923|(0.994,0.999,0.960)|1
--PVTAGVTQTPKFQVLKSGQSMTLQCAQDMNH---------DGMYWYRQDPGMGL---R
LIHYSV-G--EGTT---AKGEVPDGYNVSRSN-TKDFPLR------LE-AAAPSHTSVYF
CASSDSTV--
>V1RF-AGCE01061995.1-trbv |(16809, 17122)|2.99385601037|(1.000,1.000,0.994)|1
--PLDSAVSQTPKYLVTQMGKKESLKCEQNLGH---------DTMYWYKQDSKKLL---K
IMFIYN-N--KEPI---LNETVPNRFSPESPD-KAHLNLH------IE-SLELGDSAVYF
CASSQDTALQ
>V2RF-AGCE01061995.1-trbv |(20780, 21093)|2.72988674503|(0.981,0.930,0.874)|1
--PMDTGVTQTPKHLVMGMAHNKSLKCEQNLGH---------NAMYWYKQKAKMPL---E
LMFIYS-F--QKQT---ENNSVSSRFTPECPD-SSHLHLH------LH-ALQPEDSALYL
CASSQDTALQ
>V3RF-AGCE01061995.1-trbv |(27181, 27477)|2.85123317448|(0.986,0.932,0.950)|1
--LGEAGVTQTPRHLIKMRGQQVTLRCSPVSGH---------NRVFWYQQAPGQGP---Q
FLFNYY-N--EMQR---QKGNFPDRFSGHQFS-NHSSEMN------VS-ALELGDSALYL
CASSL-----
>V4RF-AGCE01061995.1-trbv |(36451, 36748)|2.98432022844|(0.999,1.000,0.986)|1
--PVNAGVTQTPKFQVLKTGQSITLQCAQDMNH---------DRMYWYRQDPGMGL---R
LIHYSV-G--EGTT---AKGEVPDGYKVSRSN-TKDFPLR------LE-AAVPSQTSMYF
CASSD-----
>V9RF-AGCE01061998.1-trbv |(1696, 1993)|2.98774003277|(0.999,0.991,0.998)|1
--HGDAEITQSPRHKGTETGRQVTLKCHQTWNH---------NYMYWYRQDLGHGL---R
LIHYSY-G--VQDI---NKGEVSDGYVASRSN-LEDFPLT------LE-SALSSQTSVYF
CASSD-----
>V10RF-AGCE01062000.1-trbv |(935, 1235)|2.88596034001|(0.955,0.963,0.969)|1
--QTDAGVIQSPRHKVTQMGQSVTLRCEPISGH---------NDLLWYRQTLVQTL---E
LLSYFR-S--QTRV--DDSEMPQDRFSAEMPN-ASFSSLR------IQ-PTEPRDSALYL
CASTF-----
>V11RF-AGCE01062000.1-trbv |(15550, 15847)|2.98789600501|(0.998,0.993,0.997)|1
--HGDAEITQSPRHKVTKTRRQVTLKCHQTWNH---------NYMYWYRQDLGHGL---R
LIHYSV-A--ADNT---EKGEVSHGYVVSRSN-TEDFPLT------LE-SATHSQTSVYF
CASSD-----
>V12RF-AGCE01062000.1-trbv |(27286, 27586)|2.76862388095|(0.911,0.937,0.924)|1
--CTDTGIIQSPKHEVTEMGQAVTLRCEPILGH---------NLLFWYRQTLVQGL---E
LLSYFR-G--RSII--DDEQMPKDRFSAERPD-GSFSTLR------IQ-PAEQGDSAVYI
CASRL-----
>V13RF-AGCE01062002.1-trbv |(433, 734)|2.94412737936|(0.994,0.991,0.963)|1
----NAGVTQTPKFQVLKKGQSMTLQCAQDVNY---------DCMYWYRQDPGMGL---R
LIYYSV-D--EGIT---DKGEVHHGYNVSRSN-REDFPLR------LE-AAALFQTSVYF
CAISASTV--
>V15RF-AGCE01062004.1-trbv |(4599, 4895)|2.96912824764|(0.992,0.999,0.979)|1
--PVEAGVTQNPTHLIKTRGQQVTLRCSPISGH---------TSVSWYQQALGQGP---E
FILEYY-E--KKER---NRGNFPHRFSGHQFR-DYSSDLN------VS-NLERGDSALYL
CASSL-----
>V16RF-AGCE01062006.1-trbv |(795, 1091)|2.96912824764|(0.992,0.999,0.979)|1
--PVEAGVTQNPTHLIKTRGQQVTLRCSPISGH---------TSVSWYQQALGQGP---E
FILEYY-E--KKER---NRGNFPHRFSGHQFR-DYSSDLN------VS-NLERGDSALYL
CASSL-----
>V17RF-AGCE01062008.1-trbv |(590, 890)|2.99293600205|(0.999,0.999,0.995)|1
--HAGAGVSQDPRHKVTKTGQNVTFRCDPISGH---------NSLYWYRQTLGQSP---E
FLTYFQ-N--EVQL--DKSGLPSDRFFAERTK-GSFSTLK------IQ-RTEQGDSAMYL
CASSL-----
>V18RF-AGCE01062008.1-trbv |(6797, 7094)|2.9829000027|(0.994,0.991,0.998)|1
--SVAAGVIQYPRHLIKEKRKTAILKCYPIPGH---------DTVYWYQQGPGQGL---Q
FLISYY-E--KTQR---DKGSIPDRFTAQQFS-DYHSELN------MS-SLELGDSALYL
CASSL-----
>V19RF-AGCE01062009.1-trbv |(1447, 1744)|2.98989600501|(0.998,0.999,0.993)|1
--HMDGRITQSPRHKVTETGTPVALRCHQTENH---------RYMYWYRQDLGHGL---R
LIYYSY-G--VKDI---SKGEVPDGYNVSRSN-TEDFPLT------LE-STTGSQTSVYF
CASSD-----
>V20RF-AGCE01062009.1-trbv |(16503, 16803)|2.9929000027|(1.000,0.997,0.996)|1
--HTDAGVIQSPQHKMTEMGQEVTLRCEPISGH---------TQLFWYRQTVMRGL---E
LLTYFN-N--ENLI--DDSGMPKDRFSAQMPN-ASFSTLK------IQ-PSEPGDSAVYF
CASSL-----
>V21RF-AGCE01062009.1-trbv |(38765, 39065)|2.98392000218|(0.994,0.998,0.992)|1
--HTAAGVTQFPSHRVIEKGQAVTLRCDPISGH---------EYLYWYRRVMGKEI---K
FLIYFL-R--DSKQ--DESGMPNHRFSAERTG-GTNSTLK------VQ-SAELEDSGIYF
CASSL-----
>V24RF-AGCE01062011.1-trbv |(9642, 9942)|2.84830455465|(0.955,0.928,0.969)|1
--LSNAGVTQNPRHLVRRKGQEARLRCSPVKGH---------NHVYWYQQLLGEGL---K
FMIYLQ-R--ESTI--DESGMPKEQFSAEFPK-EGPSVLR------IQ-QAERGDSAAYF
CASSV-----
>V26RF-AGCE01062012.1-trbv |(11525, 11825)|2.76693810876|(0.967,0.911,0.913)|1
--SLDTKVTQRPRHVVTAKEQKAKMDCVPIKGH---------GYVYWYHKKLEEEL---K
FLFYLQ-N--GEII--QKAEEINERFSAQCPE-NSPCALE------IQ-STESGDAGLYF
CASSK-----
>V28RF-AGCE01062014.1-trbv |(50744, 51041)|2.31166022134|(0.909,1.000,0.658)|1
--PLEAQVTQNPRYLITVTGKKLTVTCSQNMNH---------EYMSWYRQDPGLGL---R
QIYYSN-N--VDLV---DKGDVPEGYNVSRKE-KRNFPLI------LE-RPRPNQTSLYL
CASSL-----
>V29RF-AGCE01062014.1-trbv |(56057, 56354)|2.86040247224|(0.965,0.935,0.964)|1
--LVEVKVTQNPRYLVKRVGEKVFLECAQDMDH---------GRMFWYRQDPGLGL---R
LIYFSY-D--IKTD---EEGDVPDGYSVSREK-KEQFSLI------LG-SARTNQTSVYL
CASSS-----
>V31RF-AGCE01134597.1-igkv |(30724, 31039)|2.96807224753|(1.000,0.973,0.998)|1
-STGDIVMTQTPLSLPVTLGEPASISCRSSQSLLHS-NGY--TYLNWYLQKPGQSP---Q
LLIYR-------VS--NRASGVPDRFSGSG--SGTDFTLK------IS-RVEAEDVGVYY
CMQATQTP--
>V32RF-AGCE01134598.1-igkv |(8615, 8915)|2.83394020741|(0.952,0.981,0.911)|1
-ARCDIQMTQSPSFLSASAGDRVTITCQVSQGI------S--NELPWYQQKPGKAP---T
LLIFA-------AT--RLQSGIPSQFSGPG--SGTDFTLN------IS-SLQPDDFATYY
CQQDYSYP--
>V33RF-AGCE01134599.1-igkv |(6643, 6943)|2.97488623715|(1.000,0.977,1.000)|1
-ARCDIQMTQSPSSLSASVGDRVTITCRASRSI------S--TELDWYQQKPGKAP---V
LLIYA-------AS--SLQTGVPSRFSGSG--SGTDFTLT------IS-SLQPEDVATYY
CQQDYSYP--
>V34RF-AGCE01134600.1-igkv |(5149, 5453)|2.82276675902|(0.992,0.881,0.998)|1
-SSGDIVMTQSPLFLPVTPGKPASISCRSSQSLLYS-DGN--TYLNWFLQKPGQPP---R
RLIYK-------VS--TRDSGVPDRFSGSG--SGTDFTLK------IS-QVEAEDVGVYY
CMQA------
>V35RF-AGCE01134600.1-igkv |(15938, 16236)|2.97770483945|(0.999,0.981,0.999)|1
----DIVMTQTPLSLSVTPGKPASIVCRSSQSLFDSEDGN--TYLNWYLQKPGQSP---Q
LLIYD-------AS--THASGVPDRFSGSG--SGTDFTLK------IS-RVEAEDVGVYY
CMQA------
>V36RF-AGCE01134600.1-igkv |(26942, 27257)|3.0|(1.000,1.000,1.000)|1
-SSGDIVMTQTPLSLPVTPGEPASISCRSSQSLLHS-DGY--TYLDWYLQKPGQSP---Q
LLIYT-------VS--NRASGVPDRFSGSG--SGTDFTLK------IS-RVEAEDVGVYY
CMQATQAP--
>V37RF-AGCE01134600.1-igkv |(34924, 35224)|2.99899600001|(1.000,0.999,1.000)|1
-TRCDIQMTQSPSSLSASVGDKVTITCQASQGI------N--SWLAWYQQKPGKAP---R
LLIYA-------AS--SLQTGIPSRFSGSG--SGTHYTLT------IS-SLQPDDFATYY
CQQTYSTP--
>V38RF-AGCE01134600.1-igkv |(45692, 45992)|2.99899200002|(0.999,1.000,1.000)|1
-ARCDIQMTQSPTFLSASVGDRVTITCQASQSI------G--SALAWYQQKPGKAT---R
LLIYA-------AS--SLQSGVPSRFSGSG--SGTDFTLT------IS-SLQPDDFATYY
CQQYSSFP--
>V39RF-AGCE01134602.1-igkv |(4964, 5279)|2.99698000014|(1.000,0.999,0.998)|1
-SSGDIVMTQTPLSLSVTPGEPASISCRSSQSLLHS-NGN--TYLHWFLQKPGQSP---Q
RLIYR-------VS--NLASGIPDRFSGSG--SGTDFTLK------IS-RVEAEDIGVYY
CVQSIQTP--
>V40RF-AGCE01134603.1-igkv |(27342, 27657)|2.95245749281|(0.999,0.992,0.966)|1
-SSGDTVMTQTPLSLPVTLGEPASISCRSSQSLLHS-NGN--TYLHWYLQKPGQSP---Q
LLIYK-------VS--NRASGVSDRFSGSG--SGTDFTLK------IS-RVKAEDIGVYY
CMQSTWFP--
>V41RF-AGCE01134603.1-igkv |(35325, 35640)|2.99599600001|(0.999,0.998,0.999)|1
-SSGDIVMTQTPLSLPVTPGEPASISCRSSQSLLYS-DGK--NYLYWYLQKPGQSP---Q
LLIYL-------GS--NRASGVPDRFSGSG--SGTDFTLK------IS-RVEAEDVGVYY
CMQGIELP--
>V42RF-AGCE01134604.1-igkv |(11428, 11728)|2.99392000218|(1.000,0.998,0.996)|1
-TRCDTQMTQSPSSLSASVGDRVTITCRASQSI------S--NWLAWYQQKPGQVP---K
LLIYK-------AS--TLQSGVPSRFSGSG--SGTDFTLT------IS-SLQPEDVATYY
CQKCNSAP--
>V43RF-AGCE01134604.1-igkv |(23700, 24015)|2.99899600001|(1.000,1.000,0.999)|1
-SSGDIVMTQTPLSLPVTPGEPASISCRSSQSLLHS-NGN--TYLSWYLQKPGQSP---Q
LLIYK-------VS--NRASGVPDRFSGSG--SGTDFTLK------IS-RVEAEDVGVYY
CMQDTKTP--
>V44RF-AGCE01134604.1-igkv |(38298, 38611)|2.86944063091|(0.985,0.939,0.957)|1
-STGDIVMTQSPLFMPVTLGKPASISCRSSQSLLHS-NGN--TYLSWFLQKPGQSP---R
RLIYK-------VS--TRDSGVPDRFSGSG--AGTDFTLK------IS-TVEAEDVGVYY
CLQSTRY---
>V46RF-AGCE01134609.1-igkv |(1163, 1478)|2.97745211916|(0.995,0.984,0.999)|1
-SSGDIVMTQTPLTLPVTLGKPASISCRSSQSLLYS-DGK--NYLHWYLQKPGQSP---Q
LLIYT-------AS--NRFSGVPDRFSGSG--SGTDFTLK------IS-TVEAEDVGVYY
CMQAIKHP--
>V47RF-AGCE01134610.1-igkv |(3122, 3422)|2.99899600001|(1.000,0.999,1.000)|1
-TRCDIQMTQSPSSLSASVGDKVTITCQASQGI------S--NNLAWYQQKTGKAP---R
LLINE-------AS--SLESGVPSRFSGSG--SGTDFTLT------IS-SLQPEDSATYY
CQQHNSYP--
>V48RF-AGCE01134612.1-igkv |(802, 1102)|3.0|(1.000,1.000,1.000)|1
-ARCDIQMTQSPSSLSASVGDKVTITCQASQGI------N--NYLAWYQQKPGKAP---R
LLIYY-------AS--SLDSGVPSRFSGSG--SGADYTLT------IS-SLQPEDFATYY
CQQYNSYP--
>V49RF-AGCE01134613.1-igkv |(4841, 5141)|3.0|(1.000,1.000,1.000)|1
-ARCDIQMTQSPSSLSASVGDKVTITCQASQGI------N--NYLAWYQQKPGKAP---R
LLIYY-------AS--SLQSGVPSRFSGSG--SGADYTLT------IS-SLQPEDFATYY
CQQYSSYP--
>V50RF-AGCE01134614.1-igkv |(11222, 11522)|2.99598400013|(0.998,0.998,1.000)|1
-ARCDIQMTQSPSSLSASVGDKVTITCQASQGI------S--KWLAWHQQKPGKAP---K
LLIYE-------AS--KLQSGVPSRFSGSG--SGTDFTLT------IS-SLQPEDFATYY
CQQYNSNP--
>V51RF-AGCE01134616.1-igkv |(2365, 2665)|3.0|(1.000,1.000,1.000)|1
-STGQIVMTQSPATLSLSPKETATLSCRASQSVS--------SYLAWYQQKPGQAP---R
LLIYG-------AS--TRATGIPDRFSGSG--SGTEFTLT------IS-SLEPEDFAVYY
CQQYNNRP--
>V52RF-AGCE01134616.1-igkv |(22982, 23284)|2.30498850817|(0.989,0.814,0.779)|1
-SSGDIVMTQTPLSLPVTRGELASISCRSSQSLLHS-NGN--TYLWWYLQKPGQSP---Q
PLIYK-------VS--NRFSGVPERFSGSG--SETDFTLK------IS-RVEAEDVGVYY
CMQG------
>V53RF-AGCE01134616.1-igkv |(27065, 27365)|3.0|(1.000,1.000,1.000)|1
-ARCDIQMTQSPSSLSASVGDTVTITCQASQGI------S--KWLAWYQQKPGKAP---K
LLIYD-------AS--KLQSGVPSRFSGSG--SGTDFTLT------IS-SLQPEDFATYY
CQQHNSNP--
>V54RF-AGCE01134617.1-igkv |(5600, 5900)|2.98174002125|(0.993,1.000,0.989)|1
-TSGQIVMTQSPATLSLSPKETATLSCRASQSVS--------SYLAWYQQKPGQGP---R
LLIYG-------AS--TRATGIPARFSGSG--SGTEFTLT------IS-SLEPEDFAVYY
CKQYNNWP--
>V57RF-AGCE01147749.1-ighv |(15994, 16303)|3.0|(1.000,1.000,1.000)|1
-VHSQVQLVQSG-AEVKKPGASMKVSCKASGYTF----TD--YYMNWVRQAPGKGL---E
WMGDIDP--ENGET--SYAQKFQGRVTMTADTSTSTAYME------LR-SLRSEDTAVYY
CAR-------
>V58RF-AGCE01147750.1-ighv |(13331, 13640)|2.98574002125|(0.999,0.995,0.992)|1
-VQCEVQLVESG-GGLVQSGWSLRLSCVASGSTF----SD--YYMHWVCQAPGKGL---E
WIGQINPN--GRST--YFTDFVKGRFTISRDNAKNSLYLQ------MN-NLKTEDTAVYY
CAG-------
>V59RF-AGCE01147864.1-ighv |(2102, 2409)|2.78964300365|(0.995,0.997,0.864)|1
-VCAEVQLVQSG-AEVKRPGESLKISCKASGYSF----NS--YWISWVRQMPGKGL---E
WMGIIYP--GNSDT--RYSPSFQGHVTISADKSTSTAYLQ------WS-SLKASDAAMYY
CA--------
>V60RF-AGCE01147864.1-ighv |(20911, 21220)|3.0|(1.000,1.000,1.000)|1
-VQCEVQLVESG-GGLVQPGGSLRLSCAASGFTF----SS--YWMSWVRQAPGKGL---E
WVSAINT--DGSST--YYADAVKGRFTISRDNAKNSLYLQ------MN-SLRAADTAVYY
CAR-------
>V62RF-AGCE01147865.1-ighv |(20279, 20594)|2.91773760715|(0.998,0.999,0.936)|1
-VQCEVQLVESG-GGLVQPGGSLRLSCAASVFTF----SD--YHMSWVRQAPGKGL---E
WVGLIRNKANGGTA--EYAESVKDRFTISRDDSENSLYLQ------MS-SLKPEDTAVYY
CTR-------
>V63RF-AGCE01147866.1-ighv |(3708, 4017)|2.95194507279|(0.974,0.989,0.991)|1
-AHSQGQLVQSG-AEVKKPGASVKVSCKASGYSF----TS--YVISWVRQNPRQGL---E
WMGGIYP--GNGGT--NYAQKFQGRVTMTTDKSTSTAYME------LS-SLRSEDMAMYY
CAG-------
>V65RF-AGCE01147870.1-ighv |(13126, 13438)|2.89533253614|(0.964,0.939,1.000)|1
-VQCDVQLAESG-GGLVQPGGSLRLSCAASRFTF----SS--YDMDWVCQAPGKGL---Q
WVSAVSAG--GSNT--YYADSVKGRFTISRDNGKKFLYLQ------MN-SLRAEDTAVYY
CAKK------
>V66RF-AGCE01147874.1-ighv |(2400, 2706)|2.99796800026|(0.998,1.000,1.000)|1
-VQCEVQLVESG-GGLAKPGGSLRLSCAASGFTF----SS--YAMSWVRQAPGKAL---E
WVSAIGT--G-GST--YYADAVKGRFTISRDNAKNSLFLQ------MN-SLRAEDTAVYY
CAR-------
>V67RF-AGCE01147875.1-ighv |(4611, 4920)|2.89878370744|(0.936,0.999,0.992)|1
-VQCEVQLVESG-GGLVQPRGSLRLSCAASGFTF----SS--YAMSWVRQAPGKGL---E
WVSAIST--DGSGT--SYADSVKGRFTISRDNAKNSLYLQ------MN-SLRAEDTAVYH
CER-------
>V68RF-AGCE01147944.1-ighv |(862, 1171)|3.0|(1.000,1.000,1.000)|1
-VQCEVQLVESG-GGLAKPGGSLRLSCAASGFTF----SS--YYMDWVRQAPGKAL---E
WVSAIST--DGSGT--SYADSVKGRFTISRDNAKNSLYLQ------MS-SLRAEDTAVYY
CAT-------
>V69RF-AGCE01147945.1-ighv |(15994, 16303)|2.35272065827|(0.992,0.694,0.968)|1
-VHSQVQLVQSG-AEVKKPGAPVKVSCKTSGYTF----TD--YYMHWVRQAPEQGL---E
WMGRIYP--GSGNT--NYAQKFQGRVTMTRDTSTSTAYME------LS-SLRSEDTAVYY
CAR-------
>V71RF-AGCE01148057.1-ighv |(4263, 4572)|3.0|(1.000,1.000,1.000)|1
-VQCEVQLVESG-GGLAKPGGSLRLSCAASGFVF----SS--YHMHWVRQAPGKGL---E
WVSFISS--DGGST--YYADSVKGRFTISRDNAKNSLYLQ------MS-SLRAEDTAVYY
CAR-------
>V72RF-AGCE01148067.1-ighv |(2196, 2505)|2.99798400013|(1.000,1.000,0.998)|1
-VQSQVQLVQSG-AEVKKPGASVKVSCKASGYTF----TS--YYMNWVRQAPGQGL---E
WMGWINP--YNGNT--GYAQKFQGRVTMTVDKSTSTAYME------LS-SLRSEDTAVYY
CAK-------
>V73RF-AGCE01148231.1-ighv |(5899, 6208)|2.57796848133|(0.928,0.952,0.782)|1
-VCAEVQLMQSG-AEVKRPGESLKISCKASGYSF----NS--YWIGWVRQMPGKGL---E
WMGMIYP--GDSDT--RYSPSFQGHITISADKSTSTAYLQ------WS-SLKASDAAMYY
CAR-------
>V74RF-AGCE01026519.1-trav |(24104, 24394)|2.68992114669|(0.896,0.914,0.882)|-1
--GTNSNSVKQTDQVIISEGASVTMNCTYTAM------GY--PTLFWYVQYPNKPL---Q
FLQEET-M--ENSKNFGA-----------RNIKDKNSPIA------KH-SVQVSDSAMYY
CLLRDTVLR-
>V77RF-AGCE01026520.1-trdv |(67373, 67673)|2.98020030738|(0.999,0.997,0.985)|-1
-SSMAQTVTQSQPEMSVQEAETVTLNCTYDTSN-----SN--YYLFWYKQPPSRQM---I
LIIRQE-G--FKQ-----QNATENRFSVNFQKAAKSFSLK------IS-DSQLGDTAMYF
CAYR------
>V78RF-AGCE01026520.1-trdv |(76513, 76813)|2.97658408012|(0.995,0.985,0.997)|-1
-FSIAQRVTQSESEMSVQEAETVTLNCTYDSSD-----SD--YYLFWYKQPPSRHM---I
LIIRQE-A--YKQ-----QNATENRFSVNFQKAAKSFSLK------IS-DSQLGDTAMYF
CAYR------
>V80RF-AGCE01026522.1-trav |(3924, 4211)|2.86841765962|(0.979,0.988,0.917)|-1
-LSGEDQVTQSPEALRLQEGDSSSLNCSYTVGN------F--GGLLWYRQDPGKGP---E
FLFILY-S--AGE------EKQKERLKATLTKK--ESFLR------IT-APKPEDSATYL
CAVQ------
>V81RF-AGCE01026522.1-trav |(15303, 15602)|2.9813881665|(0.997,0.985,1.000)|-1
-VSSKQEVTQIPAALSVPEGESLVFNCSFTDSA------I--YYLQWFRQDPGKGL---T
SLLLIQ-S--SQR------EQTSGRLNASLDKSSRYSTLH------IA-ASQPGDSATYL
CAVRHS----
>V82RF-AGCE01026522.1-trav |(67327, 67617)|2.86485601037|(0.957,0.957,0.951)|-1
--TIIDAKTTQPTSMDCAEGRAANLPCNHSTIS-----GN--EYIHWYRQSYSQEP---Q
YVIHGL-K--NNETNEMAS------L--IIAEDRKSSILI------LP-HATLRDTAVYY
CIVRV-----
>V84RF-AGCE01026527.1-trav |(1820, 2116)|2.98292000218|(0.995,0.997,0.991)|-1
--VNSQQGEEEPQTLSIQEGENAIINCSYKTS-------I--TSLQWYRQDSNRGL---T
QLILIR-S--NER------EKHSGRLRFMLDTSMKSSSLF------IA-AAQAADTAAYF
CATEAQC---
>V85RF-AGCE01026527.1-trav |(7054, 7345)|2.98698000014|(0.996,0.997,0.994)|-1
-RTYGDSVTQTEGPVTLPEGAALTLNCTYQSSY-----S---VFLFWYVQYLDKEP---Q
LLLKSS----ENQ------ETDSRGFQASHVKSDSSFRLE------KP-SVQLSDSAVYY
CALR------
>V86RF-AGCE01026527.1-trdv |(10273, 10576)|2.99498000014|(0.998,1.000,0.997)|-1
-SSMAQKVTQAQTEISVVEKEDVTLDCVYETSD-----TT--YYLYWYKQPSAREM---I
FLIRQN-S--FNE-----QNEISGRYSGNFQKSTSSFSLT------IA-ASQVIDSAVYF
CALSE-----
>V87RF-AGCE01026529.1-trav |(3178, 3469)|2.97057605748|(0.989,0.984,0.998)|-1
VWSQQKEVEQNPGSLSVPEGAIASLSCTYSNRA------F--QYFMWYRQYSRKGP---E
LLTFIY-S--SDK------K-EDGRFTAQLNKSSQYISLF------IR-DSQPSDSATYL
CAM-------
>V88RF-AGCE01026530.1-trav |(8602, 8899)|2.9858720041|(0.998,0.994,0.994)|-1
-DARAQSVTQPDIHITVSEGASLELRCNYSYGA-----T---PYLFWYVQSPGQGL---Q
LLLRYF-S--GDT-----LVQGIKGFEAEFKRSQSSFNLR------KP-SVHWSDAAEYF
CAVS------
>V89RF-AGCE01026530.1-trav |(21106, 21396)|2.98879201242|(0.993,0.997,0.999)|-1
--VNGENVEQHPSTLSVQVGDSSVINCTYSDSA------S--NYFPWYKQELGKGP---R
LIIDIR-S--NVD------KRKDGRMTVLLNKAAKHFSLH------IT-DTQPGDSALYF
CAAG------
>V90RF-AGCE01026530.1-trav |(40762, 41065)|2.98894800078|(0.998,0.996,0.995)|-1
VWS-QQKVEQNSGPLNVPEGVIASLNCTYSDRG------S--QSFYWYRQYPGKSP---E
LLMSVY-S--SGN--------EDGRFTAQLNRASQYVSLL------IR-DSQLSDSATYL
CAVSTRCSP-
>V92RF-AGCE01026531.1-trav |(478, 766)|2.99193600205|(0.996,0.996,1.000)|-1
VWSQQKEVEQDPGPFNVPEGTTVAFNCTYSNSA------S--QYFFWYRQDPRKGP---K
LLMSVY-S--SGN--------EDGRFTAQLNRASQYVSLL------IR-DSQLSDSATYL
CAV-------
>V94RF-AGCE01026534.1-trav |(23755, 24045)|2.98986400565|(0.994,0.999,0.997)|-1
-MSSGEDVEQS-RFLSVQEGDSVVMNCTYTDSS------S--SYLYWYKQEPGASL---Q
LLAYIL-S--NTD------MKQDQRLTVQLDKKNKHLSLH------VA-EAQTGDSAIYF
CAES------
>V95RF-AGCE01026534.1-trav |(44840, 45134)|2.96252457073|(0.979,0.994,0.991)|-1
-GISGDSVVQTEGEVLLSEGDSLTVNCSYESTG------Y--PSLFWYVQYPGKGP---E
LLLKAT-K--GND------KGSNKDFEAIYRTETTSFHLE------KG-SVRESDSAVYF
CALS------
>V98RF-AGCE01112648.1-iglv |(492, 795)|3.0|(1.000,1.000,1.000)|-1
-FVTSYELTQPH-SVSVAPGQTARITCGGN--N----IGG--KYTYWYQQKSGQSP---V
LVIYR-------DN--NRPSGIPERFSGSN--SGNTATLT------IS-GVQAGDEADYY
CQVWDSSSNH
>V99RF-AGCE01112648.1-iglv |(8719, 9022)|2.99185201038|(0.999,0.993,1.000)|-1
-SVVSSAMTQEP-AVSVALGQTARITCQGG--G----IGT--YSANWYQQKPGQAP---V
LVIYD-------NN--NRPSGIPDRFSGSS--SGNTASLT------IT-GAQVEDEADYY
CGSWDSSGTH
>V100RF-AGCE01112652.1-iglv |(287, 590)|2.91098808836|(0.992,0.935,0.997)|-1
-SATSYELTQPH-SVSVAPGQTARITCGGN--N----IGR--KNVHWYQQKSGQAP---V
LVIYN-------DN--NRPSGIPERFSGSN--SGNTATLT------IS-GVQAGDEADYY
CQVWDSSTDH
>V101RF-AGCE01112674.1-iglv |(4938, 5247)|2.98574002125|(0.999,0.995,0.992)|-1
-SWAQSVLTQPP-SASGAPGQRVTISCSGSSSNI---G-N--NYANWYQQLPGKAP---K
LLIYG-------NS--NRPSGSPDRFSGSK--SDTSATLA------IT-GLQSADEADYY
CETWDSSLNA
>V104RF-AGCE01134619.1-igkv |(32675, 32987)|2.98974002125|(0.993,0.997,1.000)|-1
-TYGDIVMTQSPGSLAVSLGERVTINCKSSQSLL--SSSK--NYLAWHQQKPGQAP---K
QIIVW-------AS--TRVSGVPDRYSGSG--SGTDFTLT------IS-SLQAEDVAVYY
CQQFYSAP--
>V105RF-AGCE01134619.1-igkv |(44281, 44572)|2.78148495223|(0.912,0.954,0.923)|-1
----NTVLTQSPALLSASLRDTIFMSCSANQSI------S--DYLTWYQQKPGQPP---K
ILVYD-------AD--NLYSGVSSRFSGIQ--SGTNFILT------IS-SVEADDAATYY
CQQDYAIP--
>V106RF-AGCE01134619.1-igkv |(59305, 59593)|2.88129965252|(0.970,0.944,0.970)|-1
-----TTLTQSPTLVSVTPGDKVTISCKASQDI------D--NDIYWYQQKPGEAP---I
FIIQE-------AT--TLVSGIPPRFSGSG--YGTDFTLT------IN-NIELEDAAYYF
CQQDDNFP--
>V107RF-AGCE01135277.1-iglv |(31, 340)|2.99698000014|(0.998,1.000,0.999)|-1
-CWAQSVLTQPP-SVSGNPGQRVTISCSGSSSNI---G-S--SYVNWYQQLPGTAP---K
LLIYD-------SN--QRPSGVSDQFSGST--SGNSASLT------IT-GLQSADEADYY
CQSYDSNLKA
>V109RF-AGCE01147916.1-ighv |(5261, 5570)|2.91293447005|(0.986,0.986,0.947)|-1
-AHSQMQLVQSE-AEVKKPGASVKVSCKASGYTF----TY--HYMHWVRQAPGQGL---E
WMGWIMP--YNGNT--NYAQKVEGRVTITRDTSMSTIYME------LR-SLRSEDTAVYY
CAR-------
>V110RF-AGCE01147919.1-ighv |(4216, 4525)|3.0|(1.000,1.000,1.000)|-1
-AHSQVQLVQSG-AEVKKPGASVKISCKASGYTF----TS--YSMHWVQQAPGQGL---E
WIGYINT--NTGGT--NYAQKFQGRVTMTRDTSTSTAYME------LS-SLKSEDTAVYY
CAR-------
>V111RF-AGCE01147923.1-ighv |(7327, 7634)|3.0|(1.000,1.000,1.000)|-1
-VLSQVQLQESG-PGLVKPSDTLSLTCAVSGYSI----SS-GYWWSWIRQPPGKAL---E
WIGSIYYS---GSA--YYNPSLKSRVTISTDMSKNQFSLR------MS-SVTAADTAVYY
CA--------
>V112RF-AGCE01147939.1-iglv |(7498, 7807)|2.98380001|(0.998,0.993,0.993)|-1
-VDSETVVTQEP-SYLVSPGGTVTLTCGLSSGSV---STS--HYPSWYQQTPGQAP---Q
MLIYS-------TN--TRPSGVPDRFSGSI--LGNKAALT------IK-GAQADDETDYY
CMLYMGSGI-
>V113RF-AGCE01148076.1-ighv |(262, 572)|2.92928365264|(0.968,0.994,0.970)|-1
LSKVQVQLQQWG-PGLVKPSETLSLTCAVYGYFI----SS-DYWWSWIRQPPGKGL---E
WIGRISYI---GST--YYNPSLKSRVTLSTDTSKSQFSLR------LS-SVTTADTVVYY
CA--------
>V114RF-AGCE01148081.1-ighv |(431, 740)|2.91939035839|(0.998,0.942,0.992)|-1
-VQSQVQLVQSG-AEVKKPGASVKVSCKTSGYTF----TN--YYMYWVRQAPGQGL---E
WMGWIYP--GNGNT--KYAQNFQGRVTMTADKSTSTAYME------LS-SLRSEDTTVYY
CAR-------
>V115RF-AGCE01148188.1-ighv |(110, 419)|2.99696400065|(1.000,0.997,1.000)|-1
-VQCEVQLVESG-GGLAKPGGSLRLSCAASGFTF----SD--YWMGWVRQAPWKGL---E
WVGEINHN--GGST--YYADSVKGRFTISRDNAKNSLYLQ------MN-SLRAEDTAVYY
CAR-------
>V116RF-AGCE01148199.1-ighv |(2012, 2325)|2.98851611711|(1.000,1.000,0.989)|-1
-VQCEVQLVESG-GGLAQPGGSLRLSCAASGFTF----SN--YWMNWVCQAPGKGL---E
WVGRIKSKADGGTA--EYTASVKGRFTISRDDSKNMLYLQ------MR-SLKTEDTAVYY
CA--------
>V118RF-AGCE01148386.1-ighv |(210, 517)|2.99696400065|(1.000,1.000,0.997)|-1
-VQCEVQLVESG-GGLVKPGGSLRLSCAASGFTL----SE--YGMHWVRQAPGKGL---E
WVSFISY--NGGYI--HYADSVKGRFTISRDNAKNSLYLQ------MS-SLRAEDTAVYY
CA--------
>V0RF-ABGA01025787.1-ighv |(2055, 2364)|2.99392000218|(1.000,0.996,0.998)|1
-TYSQVQLVQSG-HEVKQPGASVKVSCKDSGYSF----TT--YGMNWVQQAPEQGL---E
WMGWFNT--DTGNP--TYAQGFTGRFVFSMDTSVSTAYLQ------IS-SLKAEDTAMYY
CAR-------
>V2RF-ABGA01025790.1-ighv |(836, 1151)|2.92790584412|(0.994,0.944,1.000)|1
-VQCEVQLVESG-GGLVQPGGSLRLSCAASGFTS----SD--YQMYWVRQASGKGP---E
WVGYIGSKSNSYAT--AYAASVKGRFTISRDDSKNTLYLQ------MN-SLKTEDMAVYY
CAR-------
>V3RF-ABGA01025791.1-ighv |(3901, 4216)|3.0|(1.000,1.000,1.000)|1
-VQCEVQLVESG-GGLVQPGGSLRLSCAASGFTF----SS--YWMSWVRQAPGKGL---E
WVGFIKNKADGGTT--DYAASVKGRFTISRDDSKNTLYLQ------MN-SLKTEDTAIYY
CAR-------
>V5RF-ABGA01025797.1-ighv |(8415, 8724)|2.99899600001|(1.000,1.000,0.999)|1
-VQCEVQLVESG-GGLVQPGGSLRLSCVASGFTF----SS--YAMRWVHQAPGKGL---E
WVSAISG--SGGST--WYPDSVKGRFTISRDNAKNTLYLQ------MN-SLRAEDTAVYY
CVR-------
>V6RF-ABGA01025808.1-ighv |(3704, 4019)|3.0|(1.000,1.000,1.000)|1
-VQCEVQLVESG-GGLVQPGGSLRLSCAASGFTF----SS--SAMHWVRQAPGKGL---E
WVGRIRSKANSYAT--EYAASVKGRFTISRDDSKNTAYLQ------MN-SLKTEDTALYY
CTT-------
>V7RF-ABGA01025808.1-ighv |(11416, 11731)|3.0|(1.000,1.000,1.000)|1
-LQCEVQLVESG-GGLVQPGGSLRLSCAASGFTF----SD--HYMDWVRQAPGKGL---E
WVARIRNKANSYTT--EYAASVKGRFTISRDDSKNTLYLQ------MS-SLKTEDTAVYY
CAR-------
>V8RF-ABGA01025808.1-ighv |(27673, 27982)|2.99899600001|(1.000,0.999,1.000)|1
-VQCEVQLVESG-GGLVQPGGSLRLSCAASGFTF----RD--HYMNWVRQAPGKGL---E
WVSAISG--SSSST--YYADSVKGRFTISRDNAKNTLYLQ------MN-SLRAEDTAVYY
CVR-------
>V9RF-ABGA01025808.1-ighv |(39511, 39826)|2.99899200002|(0.999,1.000,1.000)|1
-VQCEVQLVESG-GGLVQPGGSLRLSCAASGFTF----SN--YYMSWVRQAPGKGL---E
WEGFIKNKTNGGTT--EYAASVKGRFTISRDDSKSITYLQ------MS-SLKTEDTAVYY
CTR-------
>V10RF-ABGA01025808.1-ighv |(52101, 52413)|2.99493200206|(1.000,0.996,0.999)|1
-VQCELQLVESR-GDLVQPGGSLRLSCAASGFTF----SS--YGMNWVCQAPGKGL---E
WVSVISRS--SGTI--HYADSMKGRFTISRDNAKNSLYLQ------MNNSLRAEDTAVYY
CVK-------
>V11RF-ABGA01025808.1-ighv |(65728, 66037)|2.95074224752|(0.990,0.996,0.967)|1
-VQSQVQLVQSG-AEVKKPGSSVKISCKVSEDTF----SS--YAISWVQQAPGQGL---E
WMGGIIP--VLGTA--DYAQKFQGRVTITADTSTSTAYME------LS-SLRSEDTAVYY
CAT-------
>V12RF-ABGA01025810.1-ighv |(7175, 7481)|3.0|(1.000,1.000,1.000)|1
-VQCEVQLVESG-GGLVQPGGSLRLSCAASGFTI----SS--YDMHWVHQAPGKGL---E
WVSAISTG--G-GT--YYADSVKGRFTISRDNAKNTLYLQ------MN-NLRAEDTAVYY
CAK-------
>V13RF-ABGA01037228.1-ighv |(1414, 1723)|3.0|(1.000,1.000,1.000)|1
-VLSQVQLQESG-PGLVKPSETLSLTCAVSGGSI----SS-GYYWGWIRQPPGKGL---E
WIGSIYYS---GST--YYNPSLKSRVTISVDTSKNQFSLK------LS-SVTAEDTAVYY
CAR-------
>V14RF-ABGA01044302.1-ighv |(5170, 5476)|2.99899600001|(1.000,0.999,1.000)|1
-VLSQVQLQESG-PGLVKPSETLSLTCAVSGGSI----S--SYYWSWIQQPPGKGL---E
WIGYIYSS---GST--NYNPSLKSRVTMSVDTSKNQFSLK------LS-SVTAADTAVYY
CAR-------
>V15RF-ABGA01044302.1-ighv |(9977, 10286)|2.99799600001|(0.999,0.999,1.000)|1
-AHSQVQLGQSG-PQVKKPESSVKVSCKASGYTF----TS--SAMQWVRQAPGQGL---E
WIGWIIV--GSGNT--NYAQKFQGRVTITRDTSTSTAYME------LS-SLRSEDTAVYY
CAA-------
>V16RF-ABGA01044304.1-ighv |(6033, 6342)|3.0|(1.000,1.000,1.000)|1
-VLSQVQLQESG-PGLVKPSETLSLTCAVSGGSI----SS-GYYWGWIRQPPGKGL---E
WIGSIYYS---GST--YYNPSLKSRVTISVDTSKNQFSLK------LS-SVTAADTAVYY
CAR-------
>V17RF-ABGA01044305.1-ighv |(3517, 3823)|2.99798400013|(1.000,1.000,0.998)|1
-VLSQVQLQESG-PGLVKPSETLSLTCAVSGGSI----S--SYYWGWIRQPPGKGL---E
WIGYIYSS---GST--NYNPSLKSRVTMSVDTSKNQFSLK------LS-SVTAADTAVYY
CVR-------
>V18RF-ABGA01044306.1-ighv |(1052, 1358)|3.0|(1.000,1.000,1.000)|1
-VLSQVQLQESG-PGLVKPSETLSLTCAVSGGSI----SS--NYWSWIRQPPGKGL---E
WIGYIYSS---GST--YYNPSLKSRVTMSIDTSKNQFSLK------LS-SVTAADTAVYY
CAR-------
>V20RF-ABGA01044307.1-ighv |(456, 762)|3.0|(1.000,1.000,1.000)|1
-VLSQVQLQESG-PGLVKPSETLSLTCAVSGGSI----S--SYYWSWIRQPPGKGL---E
WIGGIYSS---GST--YYNPSLKSRVTISVDTSKNQFSLK------LS-SVTAADTAVYY
CAR-------
>V21RF-ABGA01044310.1-ighv |(2823, 3129)|2.96391237717|(1.000,0.968,1.000)|1
-VQCEVQLVESG-GGLVQPGGSLRLSCAASGFTV----SS--SSMIWVRQAPGKGL---E
WVSYISS---DGSA--YYTDSVKGRFTVSRDNSKNTLYLQ------MN-SLRAEDTAVYY
CAK-------
>V23RF-ABGA01044310.1-ighv |(19040, 19346)|2.95938267424|(0.999,1.000,0.965)|1
--CAEVQLVQSG-AEVKRPGESLRISCKTSGYSF----TS--NWISWVRQMPGKGL---E
WMGSIYP--GDSDT--RYSPSFQGHVTISADKSISTAYLQ------WS-SLKASDTAMYY
CAK-------
>V24RF-ABGA01044313.1-ighv |(11041, 11356)|2.99899600001|(1.000,0.999,1.000)|1
-VQCEVQLVESG-GGLVHPGGSLRLSCTASGFTF----GD--YAMSWVRQAPGKGL---E
WVGFIRSKAYGGTT--EYAASVKGRFTISRDDSKSIAYLQ------MN-SLKTEDTAVYY
CAR-------
>V25RF-ABGA01044314.1-ighv |(13359, 13668)|2.83958358676|(0.998,0.889,0.999)|1
-VQCEVQLVESG-GGLVQPGGSLRLSCAASEFTF----SS--NDMSWVRQAPEKGL---E
WVSYISNS--GRTT--YYADSVKGRFTISRDNAKNSLYLQ------MN-SLRAEDTAVYY
CVR-------
>V27RF-ABGA01044319.1-ighv |(4092, 4401)|2.99480001|(0.995,1.000,1.000)|1
-VQCEVQLVESE-GGLVQPGGSLRLSCAASGFTF----DD--YAMHWVRQAPGKGL---K
WVSGINW--NGGST--YYADSVKGRFTISRDNSKNSLYLQ------MN-SLRAEDTALYY
CAK-------
>V28RF-ABGA01058270.1-ighv |(14488, 14797)|2.97970803341|(0.995,0.998,0.987)|1
-VLSQVQLQQWG-PGLVKPSETLSLTCAVCGGSI----S-SGYYWSWIRQPPGKGL---E
WIGYMHH---SGST--YYNPSLKSRVTMSVETSKNQFSLK------LS-SVTAADTAVYY
CAR-------
>V29RF-ABGA01058270.1-ighv |(28194, 28503)|2.98789600501|(0.998,0.997,0.993)|1
-VQCEVQLVESG-GGLVQSRGSLRFSCAASGFTF----SS--CGMNWVRQAPGKGL---E
WVAIIWY--DGSNK--YYADSVKGRFTISRDNSKNMLYLQ------MN-SLRVEDMAVYY
CAK-------
>V30RF-ABGA01058270.1-ighv |(38768, 39077)|2.99099200002|(0.997,0.996,0.998)|1
-VLSQVRLQESG-PGLVKPSETLSLTCAVSVDSI----SS-GYYWSWIRQPPGKGL---E
WIGYIHHS---GST--YYNPSLKSRVTMSVDTSKNQFSLK------LS-SVTAADMAVYY
CAT-------
>V31RF-ABGA01058273.1-ighv |(621, 936)|2.99899600001|(1.000,0.999,1.000)|1
-VQCDVQLVESG-GGLVQPGGSLRLSCAASGFTF----SD--YYMSWVHQPPGKGL---E
WVGLIRNKANGGTT--EYAASVKGRFTISRDDSKSIAYLQ------MN-SLKTEDTAVYY
CTR-------
>V32RF-ABGA01091248.1-trbv |(6357, 6654)|2.78135545508|(0.889,0.976,0.976)|1
--HMDAGITQSPRHKITETGTPVTLKCHQTENR---------RYMYWCRQDLGHGL---R
LIHYSY-G--VKDT---DKGEVSDGYSVSRSK-TEDFLLT------LE-SATRSQTSVYF
CAISE-----
>V34RF-ABGA01091248.1-trbv |(29358, 29658)|2.99099200002|(0.997,0.996,0.998)|1
--HTDAGVIQSPRHEVTEMGKEVTLRCKPISGH---------EDLFWYRQTMMQGL---E
LLIYFN-N--KAVM--DDSGMPKDRFSAKMPN-ASFSTLK------IQ-PSEPRDSAVYF
CASSL-----
>V35RF-ABGA01091248.1-trbv |(32661, 32961)|2.87011525692|(0.997,0.907,0.998)|1
--HTDAGVIQSPRHEVTEMGKEVTLRCKPISGH---------DYLFWYRQTMMQRL---E
LLIYFN-N--KAVM--DDSGMPKDRFSAKMPN-ASFSTLK------IQ-PSEPRDSAVYF
CASSL-----
>V36RF-ABGA01091249.1-trbv |(2283, 2583)|2.60211397144|(0.982,0.999,0.777)|1
--LIDAGVTQTPRHKVTEMGQEVTMRCQPILGH---------NTVFWYRQTMMQGL---E
LLAYFR-N--QAPL--DDSGMPKDRFSAEMPD-ATLATLK------IQ-PSEPRDSAVYL
CASGL-----
>V38RF-ABGA01091249.1-trbv |(14302, 14599)|2.98132022844|(0.998,0.985,0.999)|1
--HGVAMVIQNPRYQVTQFGKPVTLSCSQNLNH---------NVMYWYQQKSSQAP---K
LLFHYY-D--KDF---NNEADTPDNFQSRRPN-TSFCFLD------IR-SPGLGDAAMYL
CATSR-----
>V39RF-ABGA01091249.1-trbv |(19286, 19586)|2.96855304207|(0.996,0.997,0.977)|1
--SPGEEVTQTPKHLVKGEGQEAKLYCAPIKGH---------SYVFWYQQVLKKEF---K
FLISFQ-N--ENVF--DKTGMPKERFSAKCLP-NSPCSLE------IQ-ATKLEDSAVYF
CASSQ-----
>V41RF-ABGA01091252.1-trbv |(2503, 2800)|3.0|(1.000,1.000,1.000)|1
--TVDGGITQSPKYLFRKEGQNVTLSCEQNLNH---------DAMYWYRQDPGQGL---R
LIYYSG-I--VNDF---QKGDIAEGYSVSREK-KESFPLT------VT-SAQKNPTAFYL
CASSI-----
>V43RF-ABGA01091257.1-trbv |(2769, 3069)|2.98274002125|(0.998,0.991,0.994)|1
--SFHARVTQTPGHLVKGKGQKTKMDCTPEKGH---------TFVYWYQQNQNKEF---M
LLISFQ-N--KQVL--QETEMHKKRFSSQCPK-NTPCSLA------TL-SSEPGDTALYL
CASSQ-----
>V44RF-ABGA01091257.1-trbv |(13504, 13802)|2.90471348836|(0.994,0.997,0.930)|1
--SMDADVTQTPRNRITKTGKRIMLECSQTKGH---------DGMYWYRQDPGLGL---R
LIYYSF-D--VKDI---NKGEISDGYSVSRRT-QAKFSLS------LE-SATPNQTALYF
CATSD-----
>V45RF-ABGA01091260.1-trbv |(5031, 5328)|2.99493200206|(1.000,0.999,0.996)|1
--LMEADIYQTPRHLVIGTGKKITLECSQTMGH---------DKMYWYQQDPGMEL---H
LIHYSY-G--VNST---EKGDLSSESTVSRIR-MEHFPLT------LE-SARPSHTSQYL
CASSE-----
>V46RF-ABGA01091263.1-trbv |(8280, 8583)|2.9859000027|(0.995,0.999,0.992)|1
-SVFSAVVSQKPSRDICQRGTSLTIQCQVDSQV---------TMMFWYRQQPGQSL---T
LIATANQG--SEAT--YESGFVIDKFPISRPN-LTFSTLT------VS-NMSPEDSGIYL
CSVE------
>V47RF-ABGA01099934.1-ighv |(8362, 8671)|2.9455717188|(1.000,1.000,0.954)|1
-VLSQVQLQESG-PGLVKPSETLSLTCAVSGGSI----SS-GYYWGWIRQPPGKGL---E
WIGHINYG---GST--SYNPSLKSRVTLSVDTSKNQFSLK------LS-SVTAADTAVYY
CAR-------
>V48RF-ABGA01099934.1-ighv |(21569, 21878)|2.90384066792|(0.963,0.962,0.980)|1
-AHSHVQLVQSG-DEVRKPGASVKVSCKASGYTF----TN--HNMDWVRQAPGQGF---E
WMGGINT--NTGGT--SYAQTFQGRVIMTRDTSTNTAFME------LS-SLRSEDMTVYY
CAR-------
>V49RF-ABGA01099935.1-ighv |(7135, 7459)|2.39964261538|(0.831,0.888,0.732)|1
-AHSQVQLVQSE-PEMKQPGASVKFSCKATGYTF----TS--YVMNWVRQAPGQGL---E
WVGWINT--NTGNP--MYAQGFTGQFVFSMDTSVSTVYLQ------IS-SLKAEDMAVYY
CLRDTVWK--
>V50RF-ABGA01099938.1-ighv |(2861, 3183)|2.7476534596|(0.961,0.852,0.983)|1
-VLSQVTLKESG-PALVKPTETLTLTCTVSGFSL----SNSKMGVSWIRQPPGKAL---E
WLAHIFS---NDEK--SYSTSLKSRLTISKDTSKSQVVLT------MT-NMDPVDTATYY
CTRRAQ----
>V51RF-ABGA01099940.1-ighv |(16077, 16386)|2.99699200002|(0.999,1.000,0.998)|1
-AHAEVQLVQSG-AEVKKPGASVKFSCKVSGYTF----TE--LSMHWVRQAPGKGL---E
WMGGFDP--DDGET--IYAQKFQGRVTMTEDTSTDTAYME------LS-SLRSEDTAMYY
CAT-------
>V52RF-ABGA01099941.1-ighv |(996, 1308)|2.99698000014|(0.998,0.999,1.000)|1
-VQCEVQLVESG-GGLVQPGGSLRLSCAASGFTF----TN--YYLHWFRQAPGKGL---E
WVAYISS-GSGGST--NYPDSVKGRFTISRDNAKNTLYLQ------MN-SLRAEDTAVYY
CAR-------
>V53RF-ABGA01099941.1-ighv |(12097, 12412)|2.98851611711|(1.000,1.000,0.989)|1
-VQCEVQLVESG-GGLVQPGGSLRLSCAASGFTF----SN--YYMHWVRQAPGKGL---E
WVGFIRTEAKGGTT--EYAASVKGRFTISRDDSKSIAYLQ------TN-SLKTEDTAVYY
CTR-------
>V54RF-ABGA01099945.1-ighv |(5584, 5899)|2.99493200206|(1.000,0.999,0.996)|1
-VQCEVQLVESG-GGLVQPGGSLRLSCAASGFTF----SN--AWLSWVRQAPGKGL---E
WVGRIKSKADGGTT--DYAAPVKGRFTISRDDSKNTLYLQ------MN-SLKTEDTAVYY
CAT-------
>V55RF-ABGA01099946.1-ighv |(22626, 22932)|3.0|(1.000,1.000,1.000)|1
-VQCEVQLVESG-GGLVQPGGSLRLSCAASGFTV----SS--YDMHWVRQAPGKGL---E
WVSAIDT--D-GDT--YYADSVKGRFTISRENAKNSLYLQ------MN-SLRAKDTAVYY
CAR-------
>V56RF-ABGA01099946.1-ighv |(36315, 36622)|2.99593600205|(1.000,1.000,0.996)|1
-VQCEVQLVESG-GGLVQPGRSLRLSCAASGITF----SN--QYMSWVRQATGKGL---E
WVSYISGD--SSYT--SYADSVKGRFTISRDNAKNSLYLQ------MN-SLRVEDTAVYY
CV--------
>V57RF-ABGA01099947.1-ighv |(19776, 20085)|3.0|(1.000,1.000,1.000)|1
-VQCEVQLVESG-GGLVQPGGSLRLSCAASGFTF----SS--YSMSWVRQAPGKGL---E
WVSAISG--SGSST--YYPDSVKGRFTISRDNAKNTLYLQ------MN-SLRAEDMAVYY
CVR-------
>V58RF-ABGA01099948.1-ighv |(6262, 6577)|2.99696400065|(1.000,1.000,0.997)|1
-VQCEVQLVESG-GGLVQPGGSLRLSCAASGFTF----SN--YYMHWVRQAPGKGL---E
WVGFIASKAYGGTT--EYAASVKGRFTISRDDSKSIVYLQ------MN-SLKTEGTAVYY
CTR-------
>V59RF-ABGA01099955.1-ighv |(3483, 3787)|2.93321476928|(0.983,0.994,0.959)|1
--CAEVQLVQSG-AEVKRPGESLRISCKGSGYSF----TS--YWISWVRQMPGKGL---E
LMGIIDP--SDSDT--RYSPSFQGHITISADKSISTAYLQ------WT-SLKASDTAMYY
CA--------
>V60RF-ABGA01099956.1-ighv |(15185, 15494)|3.0|(1.000,1.000,1.000)|1
-VQCEVQLVESG-GGLVQPGGSLRLSCAASGFTF----SS--YAMYWVRQAPGKGL---E
WVSAINS--GGGST--YYADSVKGRFTISRENAKNTLYLQ------MS-SLRAEDTAVYY
CAK-------
>V61RF-ABGA01104800.1-ighv |(1132, 1438)|2.99798400013|(1.000,1.000,0.998)|1
-VLSQVQLQESG-PGLVKPSETLSLTCAVSGGSI----SG--YSWSWIRQPPGKGL---E
WIGSIHS---SGST--YYNPSLKSRVTISADTSKNQFSLK------LS-SVTAADTAVYY
CAR-------
>V62RF-ABGA01104801.1-ighv |(6863, 7169)|2.97840127932|(1.000,1.000,0.980)|1
-VLSQVQLQESG-PGLVKPSETLSLTCAVSGGSI----S--SYYWSWIRQPPGKGL---E
WIGYIHSS---GST--NSNPSLKSRVTMSVDTSKNQFSLK------LS-SVTAADTAVYY
CAR-------
>V63RF-ABGA01129113.1-trbv |(1435, 1735)|2.97661205453|(0.994,0.998,0.985)|1
--HTGAGVSQSPRYKVAKRGQDVALRCDSIFGH---------VTFYWYQQTLGQGP---E
VLTYFR-S--DAQR--DKSGLPSGRFSAERPE-GSVSTMK------IQ-HTEQGDSAVYL
CASSL-----
>V64RF-ABGA01154382.1-igkv |(15548, 15866)|2.95606187285|(0.993,0.971,0.994)|1
-AYGDIVMTQSPDSLAVSLGERITINCKSSQSVLYSSNNK--NYLAWYQQKPGQAP---K
LLIYW-------AS--TRQSGVPDRFSGSG--SGTDFTFT------IS-SLQAEDVAVYY
CQQSYSAP--
>V65RF-ABGA01154383.1-igkv |(2962, 3250)|2.89547595102|(0.988,0.971,0.945)|1
-----TTLTQSPAFVSATPGDKVTISCKASQDI------D--DDMNWYQQKPGEAA---I
FIIQE-------AT--TLISGIPPRFSGSG--YGTDFTLT------IN-NIESEDAAYYF
CLQHDNFP--
>V67RF-ABGA01174988.1-ighv |(27125, 27434)|3.0|(1.000,1.000,1.000)|1
-VQCEVQLVESG-GGLVQSRGSLRLSCAASGFTF----SS--CGMNWVRQAPGKGL---E
WVAVIWYD--GSNK--YYADSVKGRFTISRDNSKNMLYLQ------MN-SLRVEDTAVYY
CAK-------
>V68RF-ABGA01174994.1-ighv |(8215, 8524)|2.91407249552|(0.994,0.999,0.935)|1
-AQSQVQLVQSG-AEVKKPGASVKVSCKASGYTF----TN--YYMQWVQQAPGQGL---E
WMREFNT--RNGNT--QYIQEFQGRVTITRDTSTSTAYME------LS-SLRSEDTAVYY
CVR-------
>V70RF-ABGA01174995.1-ighv |(11362, 11671)|2.87575424817|(0.996,0.923,0.979)|1
-AHAKVQLVQSG-AEVKKPGASVKVSCKVSGYTL----TR--LSMHWVRQAPRKGL---E
WMGGFYP--VDGET--IYAQKFQGRVTMTEDTSTDTAYME------IS-SLRSEDTAVYY
CAT-------
>V71RF-ABGA01174999.1-ighv |(1443, 1758)|3.0|(1.000,1.000,1.000)|1
-VQCEVQLVESG-GGLVQPGGSLRLSCAASGFTF----SD--YYMSWVHQPPGKGL---E
WVGLIRNKANGGTT--EYAASVKGRFTISRDDSKSIAYLQ------MN-SLKTEDTAVYY
CTR-------
>V72RF-ABGA01174999.1-ighv |(24157, 24466)|2.91246510429|(0.981,0.998,0.941)|1
-VQCEVQLVESG-GGLVQAGESLRLSCAASGFTF----SS--YRMNWVRQAPGKGL---E
WVSYISS--DSSYI--YYADSVKVRFTISGDNAKNSMYLQ------MN-NLRAKDTPVYY
CVK-------
>V73RF-ABGA01194059.1-ighv |(3549, 3864)|3.0|(1.000,1.000,1.000)|1
-VQCEVQLVESG-GGLVQPGGSLRLSCAASGFTF----SN--HYMQWVRQAPGKGL---E
WVGLIRNKADGETT--DYAASVKGRVTISRDDSKSITYLQ------MS-SLKTEDSAVYY
CAR-------
>V74RF-ABGA01194064.1-ighv |(10045, 10354)|2.9889000027|(0.996,1.000,0.993)|1
-VLSQVQLQESG-PGLVKPLETLSLTCAVSGGSI----SS-SNWWSWVRQPPGKGL---E
WIGEIYQ---SGST--NYNPSLKSRVTISVDKSKNQFSLK------LS-SVTAADTAVYY
CAR-------
>V75RF-ABGA01197604.1-igkv |(7602, 7920)|2.97523355494|(0.999,0.978,1.000)|1
-SSGDIVMTQTPLSLPVTPGEPASISCRSSESLLDTDDEY--TYLNWYLQKPGQSP---Q
LLIYE-------VS--SQASGVPDRFSGSG--SGTDFTLK------IS-RVEAEDVGVYY
CMQALQTP--
>V76RF-ABGA01198108.1-igkv |(6191, 6491)|2.99499200002|(0.999,0.998,0.998)|1
-ARCDIQMTQSPTSLSASIGDSVTSTCQASQSI------S--NELAWYQQKPGKVP---K
LLIYR-------VS--SLQMGIPSRFSGSG--SGTDFTLT------IT-SLQPDDVATYY
CQQEYSYP--
>V77RF-ABGA01224584.1-trbv |(1799, 2096)|2.90435005376|(1.000,0.991,0.932)|1
--LVDMKVTQSSRYLVKRMGEKVFLECVQDMDH---------ERMFWYRQDPGLGL---R
LIYFSY-D--VKMK---EQGDVPEGYSVSREK-KGHFSLI------LE-SASTNQTSMYL
CASSL-----
>V78RF-ABGA01243343.1-ighv |(9466, 9772)|2.90341922997|(0.982,0.935,0.996)|1
-VLSQVQLQQWG-AGLVKPSETLSLTCAVYGGSF----S--DYGWNWIRQPPGKGL---E
WIGYIVS---SGRT--NYNPSLKSRVTMSVDTSKNQFSLK------LS-SVTAADTAVYY
CAR-------
>V79RF-ABGA01243345.1-ighv |(15320, 15629)|2.99899600001|(1.000,1.000,0.999)|1
-VQCEVQLVESG-GGLVQPGGSLRLSCAASGFTF----SS--YGMHWVRQAPGKGL---E
WVAVIWY--DGSNK--YYADSVKGRFTISRDNSKNTLYLQ------MN-SLRVEDTAVYY
CAK-------
>V81RF-ABGA01276890.1-trbv |(7515, 7815)|2.86726125864|(0.984,0.999,0.908)|1
--LTEAGVAQSPRYKIIEKRQSVAFWCNPISGH---------ATLYWYQQILGQGP---K
LLIQFQ-N--DGVV--DDSQLPKDRFSAERLK-GVDSTLK------IQ-PANLGDSAVYL
CASSL-----
>V83RF-ABGA01285645.1-igkv |(2124, 2410)|2.87447761162|(0.997,0.912,0.994)|1
-----IVMMQSPATLSVSPGERGTISCRASQSVS--------NYLAWYQQKPGQSP---R
LLIYR-------AS--NRATGIPARFSGSG--SGTDFTLT------IS-SVELEDFAVYY
CQQYNAG---
>V84RF-ABGA01285648.1-igkv |(32619, 32919)|3.0|(1.000,1.000,1.000)|1
-ARCDIQMTQSPSSVSASVGDRVTITCRASQGI------S--SALAWYQQKPGKPA---K
LLIYA-------AS--SLQSGVPSRFSGSG--SGTDYTLT------IS-SLQPEDFATYY
CQQYNSVP--
>V85RF-ABGA01285649.1-igkv |(12602, 12902)|2.99496000066|(0.999,1.000,0.996)|1
-ARCDIQMTQSPSSLSASVGDRVTITCRASQGI------S--DDLAWHQQKPGKAP---K
LLIYA-------AS--SLQSGVPSRFSGSE--SGTEFTLT------IS-SLQPEDFATYY
CQQYNSYP--
>V86RF-ABGA01285651.1-igkv |(14331, 14619)|2.93942597125|(1.000,0.998,0.951)|1
-----IVMTQSPATLSLSPGERATISCRASQSVS--------NYLAWYQQKPGQAP---R
LLIHS-------AS--TRATGIPARFSGSG--SGTDFTLT------IS-SLEPEDFAVYY
CQQGNNLP--
>V87RF-ABGA01290070.1-igkv |(266, 566)|2.98967205249|(1.000,0.991,0.999)|1
-TTGEVVLTQSPATLSLSPGERATLSCRASQSVS--------NYLAWYQQKPGQAP---R
LLIYD-------AS--NRATGIPARFSGSG--SGTDFTLT------IS-SLEPEDFAVYY
CQQRSNLP--
>V89RF-ABGA01290201.1-trgv |(11173, 11486)|2.98870803341|(1.000,0.997,0.992)|1
-SQKSSNLEGRTKSVTRPTGSSAEITCDLPGE------ST--VYIHWYLHQEGKAP---Q
RLLYYD-S--YNSRVVLESGISPGKYDTYGS-TRKNLRLI------LR-NLIENDSGVYY
CAIWD-----
>V90RF-ABGA01290201.1-trgv |(15529, 15842)|2.96929565252|(0.999,1.000,0.973)|1
-SQKSSNLEGGTKSVTRPTRSSAEITCDLTVT------NA--FYIHWYLHQEGKAP---Q
RLLYYD-V--SNSRDVLESGLGPGKYYTHT-PRWWSWILI------LR-NLIENDSGVYY
CATWY-----
>V91RF-ABGA01290202.1-trgv |(2218, 2531)|2.9725031224|(1.000,1.000,0.975)|1
-SQKSSNLEGGTKSVTRPTRSSAEITCDLTVT------NA--FYIHWYLHQEGKAP---Q
RLLYYD-V--STARDVLESGLSPGKYYTHT-PRRWSWILR------LQ-NLIENDSGVYY
CATWD-----
>V94RF-ABGA01301078.1-trbv |(8868, 9168)|2.99280401921|(1.000,1.000,0.993)|1
--HTGAGVSQSPRYKVTKRGQDVALRCDPISGH---------DYLYWYQQALGQGP---E
FLTYFQ-N--DVQL--DKSGMPSDRFSAEGLE-GSISTLK------IQ-RTEQGDSAVYL
CASSL-----
>V97RF-ABGA01301083.1-trbv |(1589, 1880)|2.99899200002|(0.999,1.000,1.000)|1
----NAGVTQTPKFRILKTGQSMTLQCAQDMNH---------NYMYWYRRDPGMGL---K
LIYYLV-A--AGTT---DKGEVPDGYSVSRST-TEDFPLT------LE-SAAPSQTSVYF
CASSY-----
>V98RF-ABGA01301086.1-trbv |(3670, 3966)|3.0|(1.000,1.000,1.000)|1
--PVDAGVTQSPTHLIKTRGQQVTLRCSPISGH---------KSVSWYQQALGQGP---Q
FIFEYY-E--KEER---GRGNFPDRFSARQFP-NYSSELN------VN-ALLLGDSALYL
CASSL-----
>V99RF-ABGA01301086.1-trbv |(10960, 11257)|2.98575601537|(0.999,0.994,0.993)|1
--PMNAGVTQTPKFQVLKTGQSMTLQCAQDMNH---------DYMSWYRQDPGIGL---R
LIHYSV-A--AGIT---EKGETPSGYNVSRSN-TEDFPLR------LE-SAAPSQTSVYF
CASSY-----
>V100RF-ABGA01301086.1-trbv |(15590, 15890)|2.98276801985|(0.991,0.998,0.994)|1
--HTGAGVSQSPRYKVTKRGQDVALRCDPISGH---------VSLFWYQQALGQGP---E
LLTYFQ-N--EVQL--HKSGLPSDRFFAERPE-GSICTLK------IQ-RTQQEDSAMYL
CASSL-----
>V101RF-ABGA01313761.1-ighv |(1090, 1396)|3.0|(1.000,1.000,1.000)|1
-VLSQVQLQESG-PGLVKPSETLSLTCAVSGGSI----S--GYYWSWIRQPPGKGL---E
WIGYIYSS---GST--NYNPSLKSRVTVSVDTSKNQFSLK------LS-SVTAADTAVYY
CAR-------
>V103RF-ABGA01313763.1-ighv |(465, 774)|2.99799600001|(0.999,0.999,1.000)|1
-AHSQVQLGQSG-PQVKKPESSVKVSCKASGYTF----TS--SAMQWVRQAPGQGL---E
WIGWIIV--GSGNT--NYAQKFQGRVTITRDTSTSTAYME------LS-SLRSEDTAVYY
CAA-------
>V104RF-ABGA01313764.1-ighv |(1353, 1662)|2.94264947362|(0.993,0.960,0.994)|1
-VLSQVQLQESG-PGLVKPSETLSLTCAVSGGSI----SS-SYYWGWIRQPTGKGL---E
WIGHIYSS---GST--YYNPSLKSRVTISVDTSKNQFSLK------LS-SVTAEDTAVYY
CAR-------
>V105RF-ABGA01318850.1-igkv |(776, 1076)|3.0|(1.000,1.000,1.000)|1
-SRCDIQMTQSPSSVSASVGDRVTITCQASQGV------S--NALAWYQQKPGKTP---K
LLIYD-------AT--TLQSGVPSRFSGSG--SGTDYTLT------IS-SLQPEDFATYY
CQQYNSYP--
>V106RF-ABGA01321409.1-igkv |(1894, 2185)|2.99899600001|(1.000,0.999,1.000)|1
----DIQMTQSPSSVSASVGDRVTITCRASQSI------S--SWLAWYQQKPGKAP---K
LLIYK-------AS--NLQSGVPSRFSGSG--SGTDFTLT------IS-SLQPEDFATYY
CQQYSSTP--
>V107RF-ABGA01321410.1-igkv |(12114, 12400)|2.99082001102|(1.000,0.997,0.994)|1
-----IVMTQSPATLSVSPGERGTISCRASQSVS--------NYLAWYQQKPGQSP---R
LLIYR-------AS--NRATGIPARFSGSG--SGTDFTLT------IS-SVEPEDFAVYY
CQQYNTG---
>V108RF-ABGA01335280.1-iglv |(1203, 1509)|2.98998400013|(0.996,0.996,0.998)|1
--DSQTVVTQEP-SFSVSPGGTVTLTCGLSSGSV---STS--YYPSWYQQTPGQAL---R
MLIYS-------TN--TRTSGVPDCFSGSI--LGNKAALT------IT-GAQADDESDYY
CVLYMGSGI-
>V109RF-ABGA01342015.1-igkv |(1575, 1875)|3.0|(1.000,1.000,1.000)|1
-TRCDIQMTQSPSSLSASVGDRVTITCRASQSI------S--NYLAWYQQKPGKVP---K
LLIYA-------AS--TLQSGVPSRFSGSG--SGTDFTLT------IS-SLQPEDVATYY
CQKHNSAP--
>V110RF-ABGA01356721.1-igkv |(4236, 4536)|3.0|(1.000,1.000,1.000)|1
-SRCDIQMTQSPSSLSASVGDRVTITCRASQSI------S--SWLAWYQQKPGKAP---K
LLIYA-------AS--SLQSGVPSRFSGSG--SGTDFTLT------IS-SLQPEDFATYY
CQQHNSYP--
>V111RF-ABGA01356722.1-igkv |(4085, 4385)|2.75597603446|(0.989,0.846,1.000)|1
-SRCDIQMTQPPSSMSAYVGDRVTVNCQASQGI------S--SWLAWYQQKPGKAP---K
LLIYK-------AS--SLQSGVPSRFSGSG--SGTDYTLT------IS-SLRPEDFATYY
CQQANGVP--
>V112RF-ABGA01356724.1-igkv |(802, 1093)|3.0|(1.000,1.000,1.000)|1
----DIQMTQSPSSVSASVGDRVTITCRASQGI------S--NYLNWYQQKPGKAP---K
LLIYA-------AS--SLQSGVPSRFSGSG--SGTDFTLT------IS-SLQPEDFATYY
CQHFNSYP--
>V113RF-ABGA01356726.1-igkv |(7542, 7842)|3.0|(1.000,1.000,1.000)|1
-TTGEIVLTQSPATLSLSPGERATVSCRASQSVS--------NYLAWYQQKPGQSP---R
LLIYD-------AS--NRATGIPARFSGSG--SGTDFTLT------IS-SLEPEDFAVYY
CQQYNNQT--
>V114RF-ABGA01356729.1-igkv |(273, 573)|3.0|(1.000,1.000,1.000)|1
-ARCDIQMTQSPSSVSASVGDRVTITCRASQGI------S--SYLAWYQQKPGKAP---K
LLIYA-------AS--SLQSGVPSRFSGSG--SGTEFTLT------IS-SLQPEDFATYY
CMQHNSYP--
>V115RF-ABGA01362157.1-ighv |(1861, 2165)|2.93907315918|(0.983,0.994,0.964)|1
--CAEVQLVQSG-AEVKRPGESLRISCKGSGYSF----TS--YWISWVRQMPGKGL---E
LMGMIDP--SDSDT--RYSQSFQGHITISADKSISTAYLQ------WT-SLKASDTAMYY
CA--------
>V117RF-ABGA01384193.1-ighv |(10967, 11276)|2.99899200002|(0.999,1.000,1.000)|1
-VQCEVQLVESG-GGLVQPGGSLRLSCAASGFTF----SS--YGMNWVRQAPGKGL---E
WVSYISG--DSSYI--NYADSVKGRFTISRDNAKNSLYLR------MN-SLRAEDTAVYY
CVK-------
>V118RF-ABGA01386446.1-trav |(520, 807)|3.0|(1.000,1.000,1.000)|1
--VNSQQGEEDPQALSIQEGENATMNCSYKTS-------I--NNLQWYRQNSGRGL---V
HLILIR-S--NER------EKHSGRLRVTLDTSKKSSSLL------IT-ASRAADTASYF
CATD------
>V119RF-ABGA01386446.1-trav |(6159, 6450)|2.99496000066|(0.999,0.996,1.000)|1
-RTNGDPVTQTEGPVTLPERAALTLNCTYQSSY-----S---AFLFWYVQYLNKEP---E
LLLRSS----ENQ------ETDSRGFQASHVKSDSSFHLE------KP-SVQLSDSAVYY
CVLR------
>V120RF-ABGA01386446.1-trdv |(9538, 9841)|2.99599600001|(0.999,0.998,0.999)|1
-SSMAQKVTQAQAAISVVEKEEVTLDCVYETRD-----AT--YYLFWYKQPSSGEL---V
FLIRQN-S--FNE-----QNEVNGRYSWNFQKSTSSFNLT------IT-ASQVMDSAVYF
CALSE-----
>V123RF-ABGA01387831.1-trav |(4904, 5207)|2.98759608|(0.999,0.989,1.000)|1
-PGIAQKITQTLPAMFVQEKEAVTLDCTYDTSD-----QS--YGLFWYKQPSSGEM---I
LLIYQG-S--YDK-----QNATEGRYSLNFQKARKSANLV------IS-ASQLGDSAMYF
CAMKE-----
>V124RF-ABGA01387833.1-trav |(6325, 6619)|2.99196000066|(0.996,0.997,0.999)|1
-RTHGDSVTQMEGPVTLSEEAFLTINCTYTATG-----Y---PSLFWYVQYPGEGL---Q
LLLKAT-K--ADD------KGSNKGFEATYHKETTSFHLE------KD-SVRESDSGVYF
CALS------
>V125RF-ABGA01387833.1-trav |(37695, 37988)|2.99698000014|(0.998,1.000,0.999)|1
VWCQQKEVEQNPGPLSVPEGAIASLNCTYSNSA------F--QYFMWYRQYSRKGP---E
LLIYIY-S--SGN------K-QDGRFTAQVDTSGKYMSLF------IR-DSQPSDSATYL
CAMS------
>V126RF-ABGA01394059.1-igkv |(7736, 8051)|2.92405208401|(0.999,0.996,0.942)|1
-SSGDIVMTQSPLSLPVTPGEPASISCRSSQSLLHS-NRY--NYLNWYLQKPGQSP---Q
LLIYL-------GS--NRASRVPDRFSGSG--SGTDFTLK------IS-RVEAEDVGVYY
CTQTLQTP--
>V127RF-ABGA01394062.1-igkv |(9765, 10067)|2.99798400013|(1.000,0.998,1.000)|1
-SSAEIVMTQTPLSLSITPGEPASISCRSSQSLLHS-DGN--TYLHWYLQKPGQPP---Q
LLIYE-------VS--NRFSGVPDRFSGSG--SGTDFTLK------IS-RVEAEDVGVYY
CMQD------
>V129RF-ABGA01394066.1-igkv |(10063, 10363)|2.98894800078|(0.998,0.995,0.996)|1
-TTGEIVLTQSPATLSLSPGERATLSCRASQSV------S--NYLAWYQQKPGQVP---R
LLIYR-------AS--NRTTGIPDRFSGSG--SGTDFTLT------IS-RLDPEDFAVYY
CQQYGSSP--
>V130RF-ABGA01394066.1-igkv |(40656, 40948)|2.62937169718|(0.995,0.793,0.992)|1
-SRGDIVMTQSPAFLSVTPVEKVTITCQASEGI------S--NYLNWYQQKPDQAP---K
LLIKY-------AS--QSISGVPSRFSGSG--SGTDFTFT------IS-SLEAEDAATYY
CQQGN-----
>V131RF-ABGA01394068.1-igkv |(3664, 3964)|3.0|(1.000,1.000,1.000)|1
-SRCDIQMTQSPSSVSASVGDRVTITCRASQGI------S--NYLAWYQQKPGKAP---K
LLIYY-------AS--SLQSGVPSRFSGSG--SGTDYTLT------IS-SLQPEDFATYY
CQQYNSYP--
>V132RF-ABGA01394071.1-igkv |(1743, 2043)|3.0|(1.000,1.000,1.000)|1
-SRCDIQMTQSPSSLSASVGDRVTITCQASQGI------S--NALAWYQQKPGKTT---K
LLIYR-------AS--SLQSGVPSSFSGSG--SGTDFTLT------IS-SLQPEDFATYY
CQQYYSDP--
>V133RF-ABGA01394075.1-igkv |(3782, 4082)|2.99067605248|(1.000,0.991,1.000)|1
-TTGEIVMTQSPATLSLSPRERATISCRASQSVS--------SNLAWYQQKPGQAP---R
LLIYG-------AS--NRATGIPARFSGSG--SGTDFTLT------IS-SLEPEDFAVYY
CQQYNNWP--
>V134RF-ABGA01047585.1-trbv |(3005, 3305)|2.72625050302|(0.924,0.876,0.936)|-1
--CFHAKVTQTPGYLVKGKGKKTKMYCTPEKGH---------TFVCWYQQNQNKEF---M
FLISFQ-N--EQVL--QETEMHKKRFSSRCPK-NPPCSLA------IL-SLEPGDTALYL
CASSP-----
>V136RF-ABGA01061552.1-trav |(1941, 2240)|2.5840861335|(0.893,0.786,0.979)|-1
--VNGQQVMQIPQCQHVQEGEDFTTYCNSSIAL---------SNIQWYKQRPGGHP---V
FLIQLV-K--SGE------VKKQKRLTFQFGEAKKNSSLH------IT-ATQTTDVGTYF
CAGHSAPQ--
>V138RF-ABGA01083932.1-trav |(371, 664)|2.99498000014|(0.998,0.997,1.000)|-1
-VSRGESVRPHLSTLGVQEGDNSVINCAYSDSA------S--DYFIWYKQESGKGP---Q
FIIDIR-S--NMD------KRQGQRVTVLLNKTVKHLSLQ------IA-ATQPGDSAVYF
CAEN------
>V139RF-ABGA01083934.1-trav |(495, 792)|2.99493200206|(1.000,0.996,0.999)|-1
-GTRAQSVTQLDSHVSVSEGALVLLRCNYSSSV-----S---PYLFWYVQYPNQGL---Q
LLLKYT-S--GTT-----LVKGINGFEAEFKKSETSFHLT------KP-SAHVSDTAQYF
CAVS------
>V140RF-ABGA01083937.1-trav |(4214, 4504)|2.99699200002|(0.999,0.998,1.000)|-1
--VNGENVEQHPSTLSVQEGDSSVIKCTYSDSA------S--NYFPWYKQEVGKGP---Q
FIIDIR-S--NMG------EKKDQRITVILNKTAKHFSLH------IT-ETQPGDSAVYF
CAAS------
>V142RF-ABGA01083939.1-trav |(4457, 4751)|3.0|(1.000,1.000,1.000)|-1
-GINGDSVVQTEGQVLLSEGDSLIVNCSYETTQ-----Y---PSLFWYVQYPGEGP---Q
LLLKAM-K--AND------KGRNKGFEATYRKETTSFHLE------KD-SVQESDSAVYF
CALS------
>V143RF-ABGA01083939.1-trav |(18067, 18360)|3.0|(1.000,1.000,1.000)|-1
-GSGKNQVEQSPQSLIILEGKNCTLQCNYTVSP------F--SNLRWYKQDTGRGP---V
SLTIMT-F--S-E-----NTKSNGRYTATLDADTKQSSLH------IT-ASQLSDSASYI
CVVS------
>V144RF-ABGA01083939.1-trav |(34050, 34338)|2.99899600001|(1.000,0.999,1.000)|-1
VWSQQKEVEQDPGPFNVPEGATVAFNCTYSNSA------S--QSFFWYRQDCRKEP---K
LLMSVY-S--S--------GNENGRFTAQLNRASQYISLL------IR-DSQLSDSATYL
CAV-------
>V145RF-ABGA01083939.1-trav |(39521, 39818)|2.98585201038|(0.993,0.994,0.999)|-1
-GTRAQSVTQLDSHVPVSEGTRVLLRCNYSSSY-----S---PSLFWYVQHPNQGL---Q
LLLKYL-S--GPT-----LVKGINGFEAEFKKSETSFHLT------KS-SAHVSDAAEYF
CAMS------
>V146RF-ABGA01113129.1-trav |(4972, 5260)|2.98796800026|(0.996,0.994,0.998)|-1
--VKSQKIEQNSEALNIQEGKTATLTCNYTNYS------P--TYLQWYRQDPGRGP---V
FLLLIR-E--NEK------EKRKERLKVSFDTTLKQSLFH------IT-ASQPADSATYF
CAL-------
>V147RF-ABGA01113130.1-trav |(6720, 7010)|2.99498000014|(0.998,1.000,0.997)|-1
-MSRGEDVEQT-LFLSVQEGDSSVINCTYTDSS------S--TYLYWYKQEPGAGL---Q
LLTYIF-S--NMD------LKQDQRLTVLLNKKDKHLSLR------IA-DTQTGDSAIYF
CAEH------
>V148RF-ABGA01113133.1-trav |(15271, 15560)|2.96719216959|(0.996,0.985,0.987)|-1
-----QSVAQPEDEVTVAEGNPLTVKCTYSVSG-----N---PYLFWYIQYPNEGL---Q
FLLKYI-T--GDN-----LVKGSYGFEAEFNKSQTSFHLK------KP-SALVSDSALYF
CAVRD-----
>V149RF-ABGA01132346.1-trgv |(695, 1008)|2.96455466254|(0.999,0.993,0.975)|-1
-SQKSSNLEGGTKSVTRPTRSSAEITCDLTVT------NA--LYIHWYLHQEGKAP---Q
RLLYYD-V--STARDVLESGLSPGKYYTHT-PRRWSWILR------LQ-NLIENDSGVYY
CATWD-----
>V150RF-ABGA01154384.1-igkv |(10732, 11047)|2.91649766228|(0.981,0.987,0.952)|-1
-CNGDIVLTQSPASLAMSPGQRATITCRASESVSVLGM-T--NLIHWYQQKPGQPP---K
LLIYR-------AS--NKDTGVPARFSGSG--SGTDFTLT------IN-PVEADDAANYY
CMQSKNFP--
>V151RF-ABGA01154386.1-igkv |(10957, 11257)|2.98542016586|(0.999,1.000,0.987)|-1
-ARCDIQMTQSPSSLSASVGDRVTITCRASQGI------S--SWLAWYQQKPGKAP---K
PLIYK-------VS--SLESGIPSRFSGSE--SGTEFTLT------IS-SLQPEDFATYY
CQQYNSVP--
>V152RF-ABGA01161530.1-igkv |(226, 526)|2.99899600001|(1.000,1.000,0.999)|-1
-IRCDIQMTQSPSSLSASVGDRVTITCRASQGI------S--NYLNWYQQKPGKAP---K
LLIYR-------AS--NLQTGVPSGFSGSG--SGTDFTLT------IS-SLQPEDIATYY
CQQYDNLP--
>V154RF-ABGA01180641.1-igkv |(2646, 2946)|2.99899600001|(1.000,1.000,0.999)|-1
-ARCDIQMTQSPSSVSASVGDRVTITCRASQSI------S--SWLAWYQKKPGKAP---K
LLIYK-------AS--SLQSGVPSRFSGSG--SGTEFTLT------IS-SLQPEDFATYY
CTQHNSYS--
>V155RF-ABGA01180644.1-igkv |(8050, 8350)|3.0|(1.000,1.000,1.000)|-1
-ARGDIQMTQSPSSLSASVGDRVTITCRASQSI------S--SYLAWYQQKPGKAP---K
PLIYA-------AS--NLQSGVPSRFSGSG--SGTEFTLT------IS-SLQPEDFATYY
CQQYKSDP--
>V156RF-ABGA01180644.1-igkv |(24182, 24473)|2.99899600001|(1.000,0.999,1.000)|-1
----DIQMTQSPSSVSASVGDRVTISCRASQSI------S--SWLAWYQKKPGKAP---K
LLIYK-------AS--SLQSGVPSRFSGSG--SGTEFTLT------IS-SLQPEDFATYY
CTQHNSYP--
>V157RF-ABGA01199503.1-igkv |(3988, 4290)|2.9701803079|(0.996,0.982,0.993)|-1
-SSGDVVMTQSPLSLPVTLGQPASISCRSSQSLVHS-DGN--TYLNWFQQRPGQPP---R
RLIYK-------VS--NRDSGVPDRFSGSG--AGTDFTLK------IS-RVEAEDVGVYY
CMQG------
>V158RF-ABGA01203420.1-ighv |(3238, 3544)|2.99294800078|(0.998,0.995,1.000)|-1
-VQCEVQLVESG-GGLVQPGGSLRLSCAASGFTV----SS--NEMSWIRQAPGKGL---E
WVSTISR---GGST--YYTDSVKGRFTISRDNSKNTLYLQ------MN-SLRVEDTAVYY
CAR-------
>V159RF-ABGA01203422.1-ighv |(651, 957)|2.53984539024|(0.981,1.000,0.751)|-1
-VLSQVQLQESG-PGLVKPSETLSLTCAVSGGSI----S--SNYWSWIRQPPGKGL---E
WIGHIHY---GGSN--YLNPSLKSRVTISVDTSKNQFSLK------LS-SVTAADTAVYY
CAR-------
>V160RF-ABGA01223433.1-trbv |(4452, 4749)|2.99498400013|(0.999,0.997,0.999)|-1
--PVNAGVTQTPKFHVLKTGQSMTLQCAQDMNH---------DYMSWYRQDPGMGL---R
LIHYSA-G--AGIT---DKGEVPNGYNVSRLN-TEDFQLR------LE-SAAPSQTSVYF
CASSY-----
>V161RF-ABGA01225869.1-trbv |(7999, 8296)|2.9888400105|(0.999,0.993,0.997)|-1
--PLEAQVTQNPRYLITVTGKKLKVTCSQNMNH---------EYMSWYRQDPGLGL---R
QIYYSM-N--VEVV---DKGDVPEGYNVSRKE-KRNFPLI------LE-SPSPNQTSLYF
CASSL-----
>V162RF-ABGA01225869.1-trbv |(13353, 13650)|2.91267000129|(1.000,0.999,0.932)|-1
--LVDVKVTQSSRYLVKRMGEKVFLECVQDMDH---------ERMFWYRQDPGLGL---R
LIYFSY-D--VKMK---EQGDVPEGYSVSREK-KGHFSLI------LE-SASTNQTSMYL
CASSL-----
>V164RF-ABGA01252206.1-iglv |(13174, 13484)|2.90635550935|(0.998,0.964,0.956)|-1
-SWDQSALIQPP-SMSGSPGQSVTISCTGTSSDV---GGY--NYVSWYQQHPGTAP---K
LMIYA-------VS--NQPSGVPNRFSGSK--SGNTASLT------IS-GLQAEDEADYY
CSSYAGSNN-
>V166RF-ABGA01252210.1-iglv |(1732, 2028)|2.895975705|(0.978,0.952,0.969)|-1
-SVASYELTQPL-SVSVAPGQTARITCGGN--N----IGS--KAVQWYQQKPGQAP---L
LVIYS-------DS--NRPSGIPEQFSGSN--LGNTATLT------IS-GAQAGDEADYY
CQVRDSST--
>V167RF-ABGA01252215.1-iglv |(9236, 9539)|2.99174403277|(1.000,0.992,1.000)|-1
-SEASYELTQPP-SVSVSPGQTARITCSGD--A----LPK--KYAYWFQQKSGQAP---V
LVIYK-------DS--KRPSGIPERFSGSS--SGTMATLT------IS-GAQVEDEADYY
CYSTDSSGNH
>V168RF-ABGA01252216.1-iglv |(11892, 12202)|2.84365312015|(0.996,0.933,0.942)|-1
-SWAQSALTQPR-SVSGSPGQSVTISCTGTSSDI---GGY--NAVSWHQQHPGKAP---K
LMIYD-------VS--NRPSGVPNRFSGSK--SGNMASLT------IS-GLQAEDEADYY
CSSYAGSYT-
>V169RF-ABGA01252218.1-iglv |(480, 780)|2.99798400013|(1.000,1.000,0.998)|-1
-SVTSYELTQPH-SVSVATAQTARITCGGN--N----IGS--KAVHWYQQKPGQAP---V
LVIYD-------DS--NQPSGIPERFSGSN--SGNTATLT------IS-GAQAGDEADYY
CQVWDSSKH-
>V170RF-ABGA01252219.1-iglv |(2097, 2400)|2.99899600001|(1.000,1.000,0.999)|-1
-SATSYELTQPP-SVSVAPRQTARITCGGN--N----IGS--KSVHWYQQKPGQAP---V
LVIYG-------DS--NRPSGISERFSGSN--SGNTATLT------IS-RVEAGDEAVYY
CQVWDSSSDY
>V171RF-ABGA01252219.1-iglv |(9992, 10295)|3.0|(1.000,1.000,1.000)|-1
-SATSYELTQPP-SVSVAPRQTARITCGGN--N----IGS--KSVHWYQQKPGQAP---V
LVIYG-------DS--DRPSGISERFSGSN--SGNTATLT------IS-RVEAGDEAVYY
CQVWDSSSDY
>V172RF-ABGA01252219.1-iglv |(17960, 18263)|2.98758408012|(1.000,0.990,0.998)|-1
-SVVSSELTQDP-AVSVTLGQTVKITCQGD--S----LRS--YYASWYQQKPGQAP---V
LVIYG-------NN--NRPSGIPDRFSGAS--SGNTASLT------IT-GAQAEDEADYY
CNSWDGSGNH
>V173RF-ABGA01252219.1-iglv |(34167, 34477)|2.99396400065|(0.997,1.000,0.997)|-1
-SWAQSALTQPP-SVSGSPGQSITISCTGTSSDV---GGY--NYVSWYQQHPGTAP---K
LMIYD-------VS--KRPSGVPDRFSGSK--SGNTASLT------IS-GLQTEDEADYY
CSSYRSGDT-
>V174RF-ABGA01252219.1-iglv |(46613, 46923)|2.99396800026|(0.998,1.000,0.996)|-1
-SWAQSALTQPA-SVSGSPGQSITISCTGTSSDV---GGY--NYVSWYQQHPGKAP---K
LMIYD-------VS--KRPSGVPDRFSGSK--SGNTASLT------IS-GLQAEDEADYY
CSSYRSGST-
>V175RF-ABGA01252219.1-iglv |(70767, 71077)|2.98242016586|(0.998,0.999,0.986)|-1
-SWAQSALTQPP-SVSGSPGQSITISCTGTSSDI---GGY--NAVSWYQQHPGKAP---K
LMIYE-------VS--KRPSGVPDRFSGSK--SGNTASLT------IS-GLQAEDEADYY
CSSYRSGGT-
>V176RF-ABGA01252220.1-iglv |(4657, 4954)|2.89778802605|(0.989,0.943,0.975)|-1
-SVDSYELTQPP-SVSVSPGQTARITCSGD--V----LGE--NYADWYQQKPGQAP---V
LVIYK-------DS--ERPPGIPERFSGST--SGNTTTLT------IS-SVLTEDKADYY
CLSGDEDN--
>V178RF-ABGA01252221.1-iglv |(89127, 89430)|2.79219716629|(0.991,0.864,1.000)|-1
-FEASYELTQPH-SVSVSPGQMARITCSGE--E----LPE--NYAYWYQQKPGQSP---V
LVIYK-------DS--ERPSGIPERFSGSS--SGTTVTLT------IS-GVQAEDEADYY
CQSADSSGTY
>V179RF-ABGA01252241.1-iglv |(4150, 4460)|2.77460823243|(0.949,0.876,0.973)|-1
-SLSQSMLTQPA-SLSASPGASASLTCTLRSDIN---VGT--YRIYWYQQKPGSPP---R
YLLRYK-S--DSDK--HQGSGVPSRFSGSKDASANAGLLL------IS-GLQSEDEAGYY
CMI-------
>V180RF-ABGA01252241.1-iglv |(8984, 9293)|2.99598400013|(0.998,0.998,1.000)|-1
-SWAQSVLTQPP-SASGTPGQRVTISCSGSSSNI---G-S--NYVYWYQQFPGMAP---K
HLIYD-------NN--QQPSGVPDRFSGSK--SGTSASLA------IS-GLRSKDEADYY
CAAWDNSLSG
>V182RF-ABGA01252243.1-iglv |(44201, 44510)|2.9969280013|(0.997,1.000,1.000)|-1
-SWAQSVLTRPP-SVSAAPGQKVTISCSGSSSNI---G-N--YAVSWYQQLPGTAP---K
LLIYE-------NN--KRPSGISDRFSGSK--SGTSATLG------IT-GLQTGDEADYY
CSAWDSSLSA
>V183RF-ABGA01252243.1-iglv |(49802, 50111)|2.99389600501|(1.000,0.995,0.999)|-1
-SWAQSVLTQPP-SASGTPGQRVTISCSGSSSNI---G-S--NYVYWYQQFPGMAP---K
LLIYD-------NN--QRPSGVPDRFSGSK--SGTSASLA------IS-GLRSEDEADYY
CAALDNSLSG
>V184RF-ABGA01252248.1-iglv |(2689, 2998)|2.72894983875|(0.928,0.878,0.933)|-1
-SVVQAGLTQPP-SVSKGLRQTATLTCTGNSNN----VGN--QGAAWLQQHQGHPP---K
LLSYR-------NN--NRPSGISERFSASR--SGNTASLT------IT-GLQPEDEADYY
CSAWDSSLSA
>V185RF-ABGA01252248.1-iglv |(12457, 12769)|2.99192000218|(0.998,0.994,1.000)|-1
-SWAEVVFTQPH-SVSGSPGQTVTISCTRSSGSI---D-N--RYVYWYQQRPGSAP---T
TVIYD-------DN--QRPSGVPDRFSGSIDSSSNSASLT------IS-GLKSEDEADYY
CQSANDSHN-
>V186RF-ABGA01252249.1-iglv |(2028, 2335)|2.89134268749|(0.980,0.928,0.995)|-1
-SWANFMLTQPH-SVSGSVGQKVIISCTRSSGSI---G-S--YYVQWYQQHSGSAP---T
TVINK-------DN--QRPSGVPDRFSGSIDSSSNSASLT------IS-GLKTEDEADYY
CQSYDSS---
>V188RF-ABGA01257764.1-igkv |(8367, 8682)|2.98242008525|(1.000,0.992,0.991)|-1
-SSGDVVMTQTPLSLPVTPGEPASISCRSSQSLLHS-DGN--TYLDWYLQKPGQSP---Q
LLIYR-------VS--NRASGVPDRFSGSG--SGTDFTLK------IS-RVEAEDVGVYY
CMQATKTP--
>V189RF-ABGA01257764.1-igkv |(15129, 15444)|2.54014435854|(0.985,0.755,0.991)|-1
-TSGDIAMTQTPLSLPVTPGEPASVSCRSSQSLLHS-DGN--TYLDWYLQKPGQPP---Q
LLIYM-------LS--YRASGVSDRFSGSG--SGTDFTLK------IS-RVEAEDVGVYY
CMQALQAP--
>V190RF-ABGA01257772.1-igkv |(3885, 4185)|3.0|(1.000,1.000,1.000)|-1
-ARCAIQMTQSPSSLSASVGDRVTITCRASQGI------S--NELSWYQQKPGQAP---T
LLIYA-------AS--SLQSGVPSRFSGSG--SGTDFTLT------IS-SLQPEDVATYY
CLQDYTTP--
>V191RF-ABGA01257777.1-igkv |(9241, 9556)|2.96391237717|(1.000,0.968,1.000)|-1
-SSGDIVMTQTPLSLPVTLGQPASMSCRSSQSLLDS-DGY--TYLDWYLQKPGQSP---Q
LLIYE-------VS--NRASGVPDRFSGSG--SGTDFTLK------IS-RVEAEDVGVYY
CMQALQVP--
>V192RF-ABGA01259417.1-trbv |(2271, 2571)|2.99289600501|(0.999,1.000,0.994)|-1
--HADTGVSQDPRHKITKRGQNVTFRCDPISEH---------NRLYWYRQTLGQGP---E
FLTYFQ-N--EAQQ--EKSGLFSDQFSAERPK-GSFSTLK------IQ-RTEQGDSAMYL
CASSL-----
>V193RF-ABGA01276916.1-igkv |(1327, 1627)|3.0|(1.000,1.000,1.000)|-1
-ARCDIQMTQSPSSVSASVGDRVTITCRASQSI------S--SWLAWYQQKPGKAP---K
LLIYK-------AS--NLQSGVPSRFSGSG--SGTDFTLT------IS-SLQPEDFATYY
CIQHSSTP--
>V196RF-ABGA01277802.1-trbv |(3406, 3702)|2.89483763492|(0.976,0.966,0.955)|-1
--PVQAGVTQSPTHLIKMRGQQVTLRCSPFSGH---------TSVSWYQQSLGQGP---Q
FIFEYA-N--ELRR---SKGNFPDRFSGRQFR-DYHSEMN------VS-ALELGDSALYL
CASRL-----
>V197RF-ABGA01277802.1-trbv |(6147, 6443)|3.0|(1.000,1.000,1.000)|-1
--PVDSGVTQTPKHLITATGQRVTLRCSPRSGD---------LSVYWYQQSLDQGL---Q
FLIQYY-N--GEER---EKGNILERFSAQQFP-DLHSELN------LS-SLELGDSALYF
CASSV-----
>V198RF-ABGA01277803.1-trbv |(1353, 1650)|2.90128218009|(0.980,0.966,0.958)|-1
--PVQAGVTQSPTHLIKMRGQQVTLRCSPFSGH---------TSVSWYQQSLGQGP---Q
FIFEYA-N--ELRR---SKGNFPDRFSGRQFR-DYHSEMN------VS-ALELGDSALYL
CASKV-----
>V199RF-ABGA01277806.1-trbv |(4577, 4874)|2.79443046761|(0.985,0.924,0.918)|-1
--PVIAGITQAPRSQILAAGRSVTLRCTQDMRH---------NAMYWYRQDLGLGL---R
LIHYSN-T--AGTI---GKGEVPDGYSVSRAN-TDDFPLT------LV-SAIPSQTSVYF
CASSD-----
>V200RF-ABGA01277808.1-trbv |(1866, 2166)|2.98759608|(0.999,1.000,0.989)|-1
--HTGAGVSQSPSNKVTEKGKDVELRCDPISGH---------TALYWYRQSLGQGL---E
FLIYFQ-G--NSAP--DESGLPSDRFYAERSG-GSISTLK------IQ-HTQQEDSAMYL
CASSL-----
>V201RF-ABGA01277809.1-trbv |(3151, 3448)|2.99396400065|(0.999,0.999,0.996)|-1
--PLDTAVSQTPKYLVTQMGKKESLKCEQNLGH---------DAMYWYKQDSKKFL---K
IMFIYN-N--KEPI---LNETVPNRFSPNSPD-KAHLQLH------IS-SLELGDSAVYF
CASSQ-----
>V203RF-ABGA01277809.1-trbv |(14738, 15029)|3.0|(1.000,1.000,1.000)|-1
----NAGVTQIPKFRVLKTGQSMTLQCAQDMNH---------DYMYWYRQDPGMGL---R
LIHYSA-G--EGTT---TKGEVPDGYNVSRLK-KQNFLLG------LE-SAAPSQTSVYF
CASSY-----
>V204RF-ABGA01277810.1-trbv |(2890, 3187)|2.99385601037|(1.000,1.000,0.994)|-1
--PVNAGVTQTPKFQVLKTGQSMILQCAQDMNH---------DYMYWYRQDPGMGL---R
LIHYSL-D--VGTT---DKGEVPDGYNVSRLN-IQNFLLR------LE-SAAPSQTSVYF
CASSE-----
>V205RF-ABGA01277810.1-trbv |(5526, 5817)|2.98867205249|(0.999,1.000,0.990)|-1
----NAGVTQTPKFRVLKTGQSITLQCAQDMNH---------NSMYWYRQDPGMGL---R
LIHYSV-G--AHST---EKGEVPDGYNVSRLN-TQNFLLR------LK-SAAPSQTSVYF
CASSE-----
>V206RF-ABGA01277811.1-trbv |(730, 1043)|2.87013442802|(0.983,0.973,0.927)|-1
--PMETGVTQTPRHLVMGMTNKKSLKCEQDLGH---------NAMYWYKQSAEKPP---E
LMFVYN-L--KEP---TENNSVPSRFSPECPN-SSHLFLH------LH-ALQPEDSALYL
CASSQDTALQ
>V207RF-ABGA01277815.1-trbv |(5061, 5368)|2.98996000066|(0.998,0.995,0.997)|-1
--PVNAGVTQTPKFQVLKTGQSMTLQCAQDMNY---------DNMYWYRQDPGMGL---K
LIHYSV-G--EGTT---DKGEVPDGYNVSRLN-RQNFLLR------LE-SAAPSQTSVYF
CASGYSTA--
>V208RF-ABGA01277825.1-trbv |(768, 1064)|2.78827949387|(0.953,0.874,0.992)|-1
--PVEAGVTQTPRCLIKTRGRQVTLSCSPISGH---------RSVSWYQQTPGQGL---Q
FLFEYF-S--GTQR---EKGNFPDRFSGHQFS-NSRSEMN------VS-ALELGDSALYL
CASSL-----
>V210RF-ABGA01277827.1-trbv |(7144, 7457)|2.90412019143|(0.998,0.996,0.929)|-1
--PIDTEVTQTPKHLVMGMTNKKSLKCEQHMGH---------RTMYWYKQKAKKPP---E
LMFAYS-Y--EKL---SINESVPSRFSPECPK-SSLLNLH------LH-ALQPEDSALYL
CASSQDTALQ
>V215RF-ABGA01277831.1-trbv |(20035, 20348)|2.97520030738|(0.996,0.998,0.982)|-1
--PIDTGITQTPKHLVMGMANKKSLKCEQHMGH---------KAMYWYKQKVKKPP---E
LMFVYN-Y--EEL---SINESVPSRFSPECPK-SSLLNLH------LH-ALQPEDSALYL
CASSQDTALQ
>V217RF-ABGA01315458.1-igkv |(1340, 1640)|2.98867205249|(0.999,1.000,0.990)|-1
-TTGEIVMTQSPATLSLSPGERATLSCRASQSVS--------NYLAWYQQKPGQAP---R
LLIYG-------AS--NRATGIPARFSGSG--SGTDFTLT------IS-SLEPEDFAVYY
CQQGNNLP--
>V220RF-ABGA01321068.1-trav |(6457, 6745)|2.99899600001|(1.000,0.999,1.000)|-1
-LSGELKVGQNPLFLSTQEGKNYTIYCNYSTT-------S--DRLYWYRQDPGKSL---E
SLFVLL-S--NGA------VKQEGRLMASLDTKARLSTLH------IT-AAVHDLSATYF
CAV-------
>V221RF-ABGA01321070.1-trav |(796, 1096)|3.0|(1.000,1.000,1.000)|-1
-FSMAQTVTQSQPEMSVQEAETVTLSCTYDTSE-----SD--YYLFWYKQPPSRQM---I
LVIRQE-A--YKQ-----QNATENRFSVNFQKAAKSFSLK------IS-DSQLGDAAMYF
CAYR------
>V222RF-ABGA01321072.1-trdv |(3234, 3535)|2.81233318446|(0.998,1.000,0.874)|-1
-SSMAQTVTQSQPEMSVQEAETVTLSCTYDTSE-----SN--YYLFWYKQPPSRQM---I
LVIRQE-A--YKQ-----QNATENRFSVNFQKAVKSFSLK------IS-DSQLGDTAMYF
CAFM------
>V223RF-ABGA01321081.1-trav |(7033, 7323)|2.87399882769|(0.930,0.978,0.989)|-1
-VSSEDKVVQSPLSLVVHEGDTVTLSCNYEVAN------F--RSLLWYKQEK-KAP---T
FLFMLT-S--SGI------EKKSGKLSSILDKKELFSILN------IT-ATQTRDSAIYL
CAVE------
>V225RF-ABGA01322683.1-igkv |(9303, 9618)|2.92422621922|(1.000,0.939,1.000)|-1
-SSGDIVMTQTPLSLPVTLGQPASMSCRSSQSLLDS-YGN--TYLDWYLQKPGQSP---Q
LLIYE-------VS--NRASGVPDRFSGSG--SGTDFTLK------IS-RVEAEDVGVYY
CMQATQTP--
>V226RF-ABGA01349559.1-trbv |(456, 747)|2.76390488653|(0.957,0.881,0.949)|-1
--LMEADIYQTPRHCVIRTGKKITLECSQTMGH---------DKMYWSRSRNGITP---H
PLFL---W--VNST---EKGDLSFESTVSRIR-IERFPLT------LE-SASPSHTSQYL
CASSE-----
>V227RF-ABGA01354649.1-ighv |(173, 497)|2.39964261538|(0.831,0.888,0.732)|-1
-AHSQVQLVQSE-PEMKQPGASVKFSCKATGYTF----TS--YVMNWVRQAPGQGL---E
WVGWINT--NTGNP--MYAQGFTGQFVFSMDTSVSTVYLQ------IS-SLKAEDMAVYY
CLRDTVWK--
>V228RF-ABGA01358461.1-trav |(1239, 1538)|2.30571431446|(0.756,0.747,0.969)|-1
-VSSKQEVTQIPGALSVPEGENLVLNCSFTDRA------I--YNLQWFRQDPGKGL---T
SLLFIQ-S--SQR------EQTSGRLNASLDKSSGRSTLS------IA-ASQPGDSATYL
CAVRHS----
>V229RF-ABGA01360476.1-ighv |(4349, 4657)|2.99192000218|(0.998,1.000,0.994)|-1
-AHSQVQLVQSG-AEVKKPGTSVKISCKASGYTF----TS--YYMHWVRQAPGQGL---E
WIGRINP--NSGNT--NYAQKFQGRVAMTRDTSISTAYME------LR-SLRSEDTATYY
CGE-------
>V230RF-ABGA01360478.1-ighv |(1164, 1473)|2.98059608|(0.990,0.991,1.000)|-1
-AHSQVQLVQSG-AEVKKPGASVKFSCKASGYTF----TD--YFMHWMLQAPGQRL---E
WMGWISA--GNGNT--KYSQKFQGRVTITRDTSASTAYME------LS-SLRSEDTAVYY
CVR-------
>V231RF-ABGA01360480.1-ighv |(4035, 4344)|2.9889000027|(0.996,1.000,0.993)|-1
-VLSQVQLQESG-PGLVKPLETLSLTCAVSGGSI----SS-SNWWSWVRQPPGKGL---E
WIGEIYQ---SGST--NYNPSLKSRVTISVDKSKNQFSLK------LS-SVTAADTAVYY
CAR-------
>V0RF-CABD02043817.1-igkv |(3028, 3328)|2.99899600001|(1.000,0.999,1.000)|1
-ARCDIQMTQSPSSLSASVGDRVTITCQASQGI------S--NNLNWYQQKPEKTP---K
LLIYA-------AS--SLQSGIPSRFSDSG--SGTDYTLT------IS-SLQPEDFATYY
CQQSDSTP--
>V2RF-CABD02105568.1-trav |(17605, 17902)|2.9059022717|(0.991,0.930,1.000)|1
-GLRAQSVAQPEDQVTVAEGNPLTVKCTYSVSG-----N---PYLFWYVQYPNKGL---K
FLLKYI-T--GDN-----LVKGSYGFEAEFNKSQTSFHLK------KP-SALVSDSALYF
CAVR------
>V3RF-CABD02105570.1-trav |(17984, 18274)|2.99196000066|(0.998,0.999,0.995)|1
-MSRGEDVEQS-LFLSVQEGDSSIIKCTYTDSS------S--TYLYWYKQEPGAGL---Q
LLMYIF-S--NMD------MKQDQRLTVLLNKKDKHLSLR------IA-DTQTGDSAIYF
CAES------
>V4RF-CABD02105575.1-trav |(937, 1225)|2.74122896022|(0.881,0.922,1.000)|1
--VKSQKIEQNSEALNIQEGKTATLTCNYTNYS------P--AYLQWCRQDPGRGP---V
FLLLIR-E--NEK------EKRKERLKVTFDTTLKQSLFH------IT-ASQPADSATYL
CAL-------
>V5RF-CABD02105579.1-trav |(4709, 5003)|3.0|(1.000,1.000,1.000)|1
-GINGDSVVQTEGQVLLSEGDSLIVNCSYETTQ-----Y---PSLFWYVQYPGEGP---Q
LLLKAM-K--AND------KGRNKGFEATYHKETTSFHLE------KD-SVQESDSAVYF
CALS------
>V6RF-CABD02105581.1-trav |(5845, 6138)|2.9771523093|(0.996,0.982,1.000)|1
-GSGKNQVEQSPQSLIILEGKNCTLRCNYTVSP------F--NNLRWYKQDTGRGP---V
SLTIMT-F--S-E-----NTKSNGRYTATLDADTKQSSLH------IT-ASQLSDSASYI
CVVS------
>V7RF-CABD02105584.1-trav |(2822, 3110)|3.0|(1.000,1.000,1.000)|1
VWSQRKEVEQDPGPFNVPEGATVAFNCTYSNSA------S--QSFFWYRQDCRKEP---K
LLMSVY-S--S--------GNEDGRFTAQLNRASQYISLL------IR-DSQLSDSATYL
CAV-------
>V8RF-CABD02105586.1-trav |(1660, 1957)|2.98896000066|(0.997,0.994,0.998)|1
-GTRAQSVTQLDSHVSVSEGTPVLLRCNYSSSY-----S---PSLFWYVQHPNKGL---Q
LLLKYT-S--RAT-----LVKGINGFEAEFKKSETSFHLT------KP-SAHMSDAAEYF
CAVS------
>V10RF-CABD02105588.1-trav |(25116, 25407)|2.99798400013|(1.000,1.000,0.998)|1
VWSQQKEVEQNSGPLSVPEGAIASLNCTYSDRR------S--QSFFWYRQYSGKSP---E
LIMSIY-S--NGD------K-EDGRFTAQLNKASQYVSLL------IR-DSQPSDSATYL
CAV-------
>V11RF-CABD02105589.1-trav |(20536, 20829)|2.99593600205|(1.000,0.996,1.000)|1
-VSRGESEGLHLPTLSVQEGDNSIINCAYSNSA------S--DYFIWYKQESGKGP---Q
FIIDIR-S--NMD------KRQGQRVTVLLNKTVKHLSLQ------IA-ATQPGDSAVYF
CAEN------
>V12RF-CABD02105589.1-trav |(26461, 26764)|2.99798400013|(1.000,0.998,1.000)|1
-PGIAQKITQTQPGMFMQEKEAVTLDCTYDTSD-----QS--YGLFWYKQPSSGEM---I
FLIYQG-S--YDQ-----QNATEGRYSLNFQKARKSANLV------IS-ASQLGDSATYF
CAMRE-----
>V13RF-CABD02105590.1-trav |(3574, 3868)|3.0|(1.000,1.000,1.000)|1
-RTRGDSVTQMEGPVTLSEEAFLTINCTYTATG-----Y---PSLFWYVQYPGEGL---Q
LLLKAT-K--ADD------KGSNKGFEATYHKETTSFHLE------KD-SVQASDSAVYF
CALS------
>V14RF-CABD02105592.1-trav |(17384, 17677)|2.99899600001|(1.000,1.000,0.999)|1
VWSQQKEVEQDPGPLSVPEGAIASLNCTYSNSA------F--QYFMWYRQYSRKGP---E
LLMYTY-S--SGN------K-EDGRFTVQVDKSSKYISLF------IR-DSQPSDSATYL
CAMS------
>V15RF-CABD02105596.1-trav |(11716, 12003)|3.0|(1.000,1.000,1.000)|1
--VNSQQGEEDPQALSIQEGENATMNCSYKTS-------I--NNLQWYRQNSGRGL---V
HLILIR-S--NER------EKHSGRLRVTLDTSKKSSSLL------IT-ASRAADTASYF
CATD------
>V16RF-CABD02105598.1-trdv |(2122, 2425)|2.99698000014|(1.000,0.998,0.999)|1
-SSMAQKVTQTQNEISVVEKEDVTLDCVYETRD-----TT--YYLFWYKQPPSGEL---V
FLVRQN-S--FDE-----QNEISGRYSWNFQKSTSSFNFT------IT-ASQVVDSAVYF
CALSE-----
>V17RF-CABD02105602.1-trav |(5884, 6171)|3.0|(1.000,1.000,1.000)|1
-LSGEDQVTQSPEALRLQEGESSSLNCSYTVSG------L--RGLFWYRQDPGKGP---E
FLFTLY-S--AGE------EKEKERLKATLTKK--ESFLH------IT-APKPEDSATYL
CAVQ------
>V18RF-CABD02105602.1-trav |(17805, 18104)|2.99398000014|(0.999,0.998,0.997)|1
-VSSKQEVTQIPAALSVPEGENLVLNCSFTDSA------I--YSLQWFRQDPGKGL---T
SLLLIQ-S--SQR------EQTSGRLNASLDKSSGHSTLY------IA-ASQPGDSATYL
CAVRHS----
>V20RF-CABD02105611.1-trdv |(4032, 4332)|2.99389600501|(1.000,0.995,0.999)|1
-SSVAQKVTQAQSSVSTSVRKAVTLNCLYETSQW----S---YYIFWYKQLPSKEM---I
FLIRQG-S--AEQ-----NA-KSGRYSVNFKKAAKSVALT------IS-ALQLEDSAKYF
CALWE-----
>V21RF-CABD02105612.1-trav |(1576, 1866)|2.86315457633|(0.991,0.907,0.993)|1
-VNSILNVEQSPQSLHVQEGDSTNFTCSFPSSN------F--YALHWYRWETAKSP---E
ALFVMT-L--NGD------EKKKGRISATLNTKEGYSYLY------IK-GSQPEDSATYL
CAF-------
>V22RF-CABD02105614.1-trav |(2102, 2401)|2.90664161214|(0.993,0.998,0.931)|1
--VNGQQVMQIPQYQHVQEGEDFTTYCNSSTTL---------SNIQWYKQRPGGHP---V
FLIQLV-K--NGE------VKKQKRLTFQFGEAKKNSSLH------IT-ATQTTDVGTYF
CAGHSAPQ--
>V23RF-CABD02105615.1-trav |(7807, 8097)|2.99899600001|(1.000,1.000,0.999)|1
--TIIDAKTTQPTSMDCAEGRAANLPCNHSTIS-----GN--EYVYWYRQIHSQGP---Q
YIIHGL-K--NNETNEMAS------L--IITEDRKSSTLI------LP-HATLRDTAVYY
CIVRV-----
>V24RF-CABD02105616.1-trav |(38647, 38934)|2.83812618092|(0.975,0.895,0.995)|1
--VRSQQPVQTPQAMILREGEDAVINCSSSK-------AL--YSVHWYRQKHGEAP---V
FLMILL-K--GGEQKGHDK------ISASFNEKKQQSSLY------LM-ASQLSYSGTYF
CGAE------
>V26RF-CABD02105626.1-trdv |(13262, 13563)|2.92222221922|(0.999,1.000,0.938)|1
-SGTAQTVTQSQPEMSVQEAETVTLSCTYDTSE-----SN--YYLFWYKQPPSRQM---I
LVIRQE-A--YKQ-----QNATENRFSVNFQKAAKSFSLK------IS-DSQLGDTAMYF
CAFM------
>V27RF-CABD02105626.1-trav |(22480, 22780)|3.0|(1.000,1.000,1.000)|1
-FSMAQTVTQSQPEMSVQEAETVTLSCTYDTSE-----SD--YYLFWYKQPPSRQM---I
LVIRQE-A--YKQ-----QNATENRFSVNFQKAAKSFSLK------IS-DSQLGDAAMYF
CAYR------
>V28RF-CABD02105628.1-trav |(15554, 15842)|2.99899200002|(0.999,1.000,1.000)|1
-LSGELKVGQNPLFLSTQEGKNYTIYCNYSTT-------S--DRLYWYKQDPGKSL---E
SLFVLL-S--NGA------VKQEGRLMASLDTKARLSSLH------IT-AAVHDLSATYF
CAV-------
>V31RF-CABD02136297.1-ighv |(2232, 2554)|2.801228024|(0.978,0.898,0.953)|1
-VLSQVTLKESG-PVLVKPTEILTLTCTLSGFSL----STSGMGMSWIRQPPGKAL---E
WLAHIFS---NDKK--SYSTSLKNRLIISKGTSKSQVVLT------MT-NMDPVDTATYY
CAWRAQ----
>V32RF-CABD02136313.1-ighv |(4960, 5275)|2.47626781106|(0.799,0.997,0.829)|1
-VQCEVQLVESG-GGLVQPGGSLRLSCAASGFTF----SN--IWMSWVRQALGKGL---E
WVGCIKSKANGGTT--DYTAPVKGRFTISRDDSKNTLYLQ------MN-SLKTEDTAVYH
CTT-------
>V33RF-CABD02136332.1-ighv |(9347, 9656)|3.0|(1.000,1.000,1.000)|1
-AHSQVQLVQSG-AEVKKPGASVKVSCKASGYTF----TS--YYMHWVRQAPGQGL---E
WMGIINP--SGGST--SYAQKFQGRVTMTRDTSTSTVYME------LS-SLRSEDTAVYY
CAR-------
>V34RF-CABD02136430.1-ighv |(38815, 39121)|3.0|(1.000,1.000,1.000)|1
-VQCEVHLVQSG-GGLVQPGGSLRLSCAGSGFTF----SS--HAMHWVRQAPGKGL---E
WVSAIGT--G-GGT--YYADSVKGRFTISRDNAKNSLYLQ------MN-SLRAEDMAVYY
CAR-------
>V35RF-CABD02196505.1-igkv |(9143, 9461)|2.91674160714|(0.998,0.936,0.998)|1
-AYGDIVMTQSPESLAVSLGERVTINCKSSQSVLYSSNNK--NYLAWYQQKPGQAP---K
LLIYW-------AS--TRQSGVPDRFSGSG--SGTDFTLT------IS-SLQAEDVAVYY
CQQYYSTP--
>V36RF-CABD02196508.1-igkv |(2277, 2565)|2.94836527997|(0.991,0.971,0.988)|1
-----TTLTQSPAFVSATPGDKVTISCKASQDI------D--DDMNWYQQKPGEAA---I
FIIQE-------AT--TLVSGIPPRFSGSG--YGTDFTLT------IN-NIESEDAAYYF
CLQDDNFP--
>V37RF-CABD02196554.1-igkv |(8457, 8757)|2.99899200002|(0.999,1.000,1.000)|1
-ARCDIQLTQSPTSLSASVGDRVTITCQASQGI------S--NNLAWYQQKPGKVP---K
LLIYS-------AS--SLQSGVPSRFSGSG--SGTDFTRT------IS-SLQPEDVATYY
CQRTYNAP--
>V38RF-CABD02196563.1-igkv |(2290, 2590)|3.0|(1.000,1.000,1.000)|1
-ARCDIQMTQSPSSLSASVGDRVTITCRASQGI------S--SWLAWYQQKPGKAP---K
LLIYA-------AS--SLESGVPSRFSGSG--SGTDFTLT------IS-SLQPEDFATYY
CQQANSFP--
>V39RF-CABD02196568.1-igkv |(5046, 5361)|2.96820529852|(0.999,0.992,0.979)|1
-SSADIVMTQTPLSLPVTPGQPASISCKSSQSLLHSD-GK--TYLYWYLQKPGQSP---Q
LLIYE-------VS--NRASGVPDRFSGSG--SGTDFTLK------IS-RVEAEDVRVYY
CMQGIQLP--
>V40RF-CABD02196577.1-igkv |(8821, 9136)|2.91258947566|(0.982,0.949,0.986)|1
-SSGDIVMTQTPLSLPVNPGQLASISCRSSQSLLHS-NGY--TYLHWYLQKPGKSP---Q
LLIYR-------VS--SHFSGVPDRFSGSG--SGSDFTLK------IS-WVEAEDVGVYY
CMQATQFP--
>V42RF-CABD02196586.1-igkv |(1073, 1373)|3.0|(1.000,1.000,1.000)|1
-ARCDIQMTQSPSSVSASVGDRVTITCRASQGI------S--NSLNWYQQKPGKAP---R
LLIYD-------AS--SLESGVPSRFSGSG--SGTDFTLT------IS-SLQPEDFATYY
CQQFNSYP--
>V43RF-CABD02196587.1-igkv |(1282, 1582)|3.0|(1.000,1.000,1.000)|1
-ARCAIQMTQSPSSLSASVGDRVTITCRASQGI------S--SYLAWYQQKPGKAP---K
LLIYY-------AS--SLQSGVPSRFSGSG--SGTDYTLT------IS-SLQPEDFATYY
CQQHSSTP--
>V44RF-CABD02196588.1-igkv |(1835, 2135)|2.99798400013|(1.000,1.000,0.998)|1
-TTGEIVMTQSPATLSVSPGERATLSCRASQSVS--------SYLAWYQQKPGQAP---R
LLIYG-------AS--NRATGIPARFSGSG--SGTDFTLT------IS-SLEPEDFAVYY
CQQYNNWS--
>V45RF-CABD02196595.1-igkv |(5365, 5665)|3.0|(1.000,1.000,1.000)|1
-ARCAIRMTQSPSSLSASTGDRVTITCRASQGI------S--SYLAWYQQKPGKAP---K
LLIYA-------AS--TLQSGVPSRFSGSG--SGTEFTLT------IS-CLQSEDFATYY
CQQYYSYP--
>V46RF-CABD02199693.1-igkv |(2056, 2356)|3.0|(1.000,1.000,1.000)|1
-ARCDIQVTQSPSSLSASVGDRVTITCRASQGI------S--NELSWYQQKPGQAP---T
LLIYA-------AS--SLQSGVPSRFSGSG--SGTDFTLT------IS-SLQPEDIATYY
CLQDYTTP--
>V47RF-CABD02231299.1-iglv |(4157, 4463)|2.98974003277|(0.999,1.000,0.991)|1
--DSQTVVTQEP-SFSVSPGGTVTLTCGLSSGSV---STS--YYPSWYQQTPGQAP---R
MLIYS-------TN--TRSSGVPDRFFGSI--IGNKAALT------IT-GAQADDESDYY
CVLYMGSGI-
>V49RF-CABD02231318.1-iglv |(3555, 3862)|2.994900005|(1.000,1.000,0.995)|1
-SWANFMLTQPH-SVSESPGQTVTISCTRSSGSI---A-S--NYVQWYQQRPGSAP---T
TVIYE-------DN--QRPSGVPDRFSGSIDSSSNSASLT------IS-GLKTEDEADYY
CQSYDSS---
>V50RF-CABD02231359.1-iglv |(5556, 5865)|3.0|(1.000,1.000,1.000)|1
-SWAQSVLTQPP-SVSAAPGQKVTISCSGSSSNI---G-N--NYVSWYQQLPGTAP---K
ILIYD-------NN--KRPSGISDRFSGSK--SGTSATLG------IT-GLQTGDEADYY
CGTWDSSLSA
>V52RF-CABD02231360.1-iglv |(25045, 25355)|2.74979547493|(0.995,0.844,0.998)|1
-SLSQPVLTQPT-SLSASPGASARLTCTLRSGIN---LGT--YRIYWYQQKPGSPP---R
YLLNYY-S--DSDK--HQGSGVPSRFSGSKDASTNAGILV------IS-GLQSEDEADYY
CMI-------
>V53RF-CABD02231362.1-iglv |(1583, 1892)|3.0|(1.000,1.000,1.000)|1
-SWAQSVLTQPP-SASGTPGQRVTISCSGSSSNI---G-S--NTVNWYQQLPGTAP---K
LLIYD-------NN--KRPSGVPDRFSGSK--SGTSASLA------IS-GLRSEDEADYY
CAAWDDSLNG
>V54RF-CABD02231364.1-iglv |(18770, 19079)|3.0|(1.000,1.000,1.000)|1
-SWAQSVLTQPP-SASGTPGQRITISCSGSSSNI---G-S--NTVNWYQQLPGTAP---K
LLIYD-------NN--KRPSGVPDRFSGSK--SGTSASLA------IS-GLQSEDEADYY
CAAWDDSLNG
>V56RF-CABD02231410.1-iglv |(1308, 1605)|2.99899200002|(0.999,1.000,1.000)|1
-SVASYELTQPS-SVSVSPGQTARITCSGD--V----LAK--NYAGWYQQKPGQAP---V
LVIYK-------DS--ERPSGIPERFSGSS--SGTTVTLT------IS-GAQVEDEADYY
CYSAADNN--
>V57RF-CABD02231415.1-iglv |(2745, 3048)|2.99385601037|(1.000,0.994,1.000)|1
-SEASYELTQPP-SVSVSLGQTARITCSGE--E----LPK--KYAYWYQQKPGQSP---V
LVIYK-------DS--ERPSGIPERFSGSS--SGTTVTLT------IS-GVQAEDEADYY
CLSADSSDTY
>V59RF-CABD02231416.1-iglv |(22863, 23166)|2.93795283525|(0.995,0.953,0.997)|1
-SVVSSELTQDP-AVSVALGQTVRITCQGD--S----LRS--YYASWYQQKPGQVP---V
LIIYG-------KN--NRPSGIPDRFSGSS--SGNTASLT------IT-GAQEEDEADYY
CNSWDSSGNH
>V60RF-CABD02231419.1-iglv |(2003, 2306)|2.99696400065|(1.000,1.000,0.997)|1
-SWAQSALTQPP-SVSGSPGQSVTISCTGTSSDI---GGY--NRASWYQQHPGKAP---K
LMIYE-------VS--KRPSGVSNRFSGSK--SGNTASLT------IS-GLQAEDEADYY
CSSYTSS---
>V61RF-CABD02231421.1-iglv |(1448, 1751)|2.994900005|(1.000,1.000,0.995)|1
-SWAQSALTQPA-SVSGSPGQSITISCTGTSSDV---GGY--NYVSWYQQHPGKAP---K
LMIYY-------VS--NRPSGVSNRFSGSK--SGNTASLT------IS-GLQAEDEADYY
CSSYTSS---
>V62RF-CABD02231422.1-iglv |(7425, 7728)|2.99593600205|(1.000,0.996,1.000)|1
-SATSYELTQPH-SVSVATAQTARITCGGN--N----IGS--KAVHWYQQKPGQDP---V
LVIYS-------DS--NRPSGIPERFSGSN--SGNTATLT------IS-RIEAGDEADYY
CQVWDSSSDH
>V63RF-CABD02231427.1-iglv |(14063, 14366)|2.99899600001|(1.000,0.999,1.000)|1
-SEASYELTQSP-SVSVSPGQTARITCSGD--A----LPK--KYAYWYQQKPGQAP---V
LVIYE-------DS--KQPSGIPERFSGSS--SGTMATLT------IS-GAQVEDEADYY
CYSTDSSGNH
>V64RF-CABD02231427.1-iglv |(25067, 25377)|2.90982792659|(0.988,1.000,0.934)|1
-SWAQSALIQPP-SASGSPGQSVTISCTGTSSDI---GGY--NYVSWYQRHPGKAP---K
LMIYE-------VS--NRPSGVPNRFSGSK--SGNTASLT------IS-GLQAEDEADYY
CCSYAGSNN-
>V65RF-CABD02231431.1-iglv |(3583, 3879)|3.0|(1.000,1.000,1.000)|1
-SVASYELTQPP-SVSVSPGQTASITCSGD--K----LGD--EYAYWYQQKPGQSP---V
LVIYQ-------DS--KRPSGIPERFSGSN--SGNTATLT------IS-GTQAMDEADYY
CQAWDSST--
>V67RF-CABD02352480.1-trbv |(136, 449)|2.98651211712|(0.999,1.000,0.988)|1
--PIDTEVTQTPKHLVMGMTNKKSLKCEQHMGH---------RAMYWYKQKAKKPP---E
LMFVYS-Y--EKL---SVNESVPSRFSPECPN-NSLLNLH------LH-ALQPEDSALYL
CASSQDTALQ
>V68RF-CABD02352480.1-trbv |(7988, 8284)|2.80104052678|(0.998,0.921,0.926)|1
--PVEAGVTQTPRYLIKTRGQQVTLSCSPISGH---------RSVSWYQQTLGQGL---Q
FLFEYF-G--ETQR---NKGNFPGRFSGRQFS-NSRSEMN------VS-TLELGDSALYL
CASSL-----
>V69RF-CABD02352482.1-trbv |(248, 545)|2.9958720041|(0.996,1.000,1.000)|1
--PVNAGVAQTPKFQVLKTGQSMTLQCAQDMNH---------NSMYWYRQDPGMGL---R
LIYYSA-A--EGTT---AKGEVPDGYNVSRLN-KREFSLR------LE-SAAPSQTSVYF
CASSE-----
>V70RF-CABD02352488.1-trbv |(3197, 3494)|2.99798400013|(1.000,1.000,0.998)|1
--PVNAGVTQTPKFHVLKTGQSMTLLCAQDMNH---------EYMYWYRQDPGMGL---R
LIHYSV-G--EGTT---AKGEVPDGYNVSRLK-KQNFLLG------LE-SAAPSQTSVYF
CASSY-----
>V71RF-CABD02352491.1-trbv |(2383, 2680)|3.0|(1.000,1.000,1.000)|1
--PLDTAVSQTPKYLVTQMGKKESLKCEQNLGH---------NAMYWYKQDSKKFL---K
TMFIYS-N--KEPI---LNETVPNRFSPDSPD-KAHLNLH------IN-SLELGDSAVYF
CASSQ-----
>V72RF-CABD02352492.1-trbv |(775, 1088)|2.9338228881|(0.999,1.000,0.946)|1
--PMEMGVTQTPRHLVMGMTNKKSLKCEQHLGH---------NAMYWYKQSAKKPL---E
LMFVYS-L--EERV---ENNSVPSRFSPECPN-SSHLFLH------LH-ALQPEDSALYL
CASSQDTALQ
>V73RF-CABD02352493.1-trbv |(4882, 5179)|2.98878801933|(0.998,1.000,0.991)|1
--PVDAGVTQTPKFQVLKTGQSMTLQCAQDMNH---------NYMYWYRQDPGKGL---R
LIHYSA-G--EGTT---AKGEVPDGYNVSRLN-TQNFLLR------LE-LAARSQTSVYF
CATSE-----
>V74RF-CABD02352494.1-trbv |(447, 747)|2.988900005|(0.998,0.998,0.993)|1
--HTRAGVSQSPSNKVTEKGKDVVFRCDPISGH---------SVLYWYQQSLGQGL---E
FLIYFQ-G--NSAP--DKSGLPSDRFSAERTG-GSVSTLT------IQ-RTQQEDSAMYL
CASSL-----
>V75RF-CABD02352498.1-trbv |(5308, 5605)|2.85697750543|(0.995,0.961,0.925)|1
--PMIAGITQAPTSQILAAGRSMTLRCTQDMRH---------NAMYWYRQDLGLGL---R
LIHYSN-T--AGTT---GKGEVPDGYSVSRAN-TDDFPLM------LA-SAVPSQTSVYF
CASSD-----
>V76RF-CABD02352499.1-trbv |(1151, 1451)|2.99280401921|(1.000,1.000,0.993)|1
--HTGAGVSQTPSNKVTEKGKDVELRCDPISGH---------TALYWYRQSLGQGP---E
FLIYFQ-G--TGAT--DDSGLPNDRFFAVRPE-GSVSTLK------IQ-RTEQGDSAVYL
CASSL-----
>V77RF-CABD02352499.1-trbv |(5984, 6280)|2.32298620522|(0.853,0.717,0.827)|1
--PVEAGATQSPTHLLKTRGQQVTLRCSPISGH---------SSVSWYQKAPGQGP---Q
FIFEYA-N--ELRR---LEGNFPNRFSGRQFH-DYRSEMN------VS-ALELGDSALYL
CARSL-----
>V78RF-CABD02352499.1-trbv |(8716, 9012)|2.99796800026|(0.998,1.000,1.000)|1
--PVDSGVTQTPKHLITATGQRVTLRCSPRSGD---------LSVYWYQQSLDQGL---Q
FLIQYY-N--GEER---AKGNILERFSAQQFP-DSHSELN------LS-SLELGDSALYL
CASSV-----
>V81RF-CABD02352501.1-trbv |(16783, 17080)|2.98851611711|(1.000,1.000,0.989)|1
--PVNAGVTQTPKFQVLKTGQSMTLQCAQDMNH---------DYMYWYRQDPGMGL---R
LIHYSV-G--AGIT---DKGEVPNGYNVSRSN-TEDFPLR------LQ-SAAPSQTSVYF
CASSY-----
>V82RF-CABD02352502.1-trbv |(788, 1088)|3.0|(1.000,1.000,1.000)|1
--HTGAGVSQSPRYKVAKRGRDVALRCDSISGH---------VTLYWYRQTLGQGS---E
VLTYFR-S--DAQR--DKSGRPSGRFSAERPE-RSVSTLK------IQ-RTEQGDSAVYL
CASSL-----
>V83RF-CABD02352503.1-trbv |(2597, 2893)|2.99899600001|(1.000,0.999,1.000)|1
--SVETGVTQSPTHLIKTRGQQVTLRCSPQSGH---------NTVSWYQQALGQGP---Q
LIFQYY-R--EEEN---GRGNFSPRFSGRQFP-NYSSELN------VN-ALELDDSALYL
CASSL-----
>V84RF-CABD02352508.1-trbv |(1078, 1374)|3.0|(1.000,1.000,1.000)|1
--PVDAGVTQSPTHLIKTRGQQVTLRCSPQSGH---------NTVSWYQQALGQGP---Q
FIFEYY-E--KEER---GRGNFPDRFSARQFP-NYSSELN------VN-ALLLGDSALYL
CASSL-----
>V87RF-CABD02352509.1-trbv |(10643, 10939)|2.99799200002|(1.000,0.999,0.999)|1
--LVDAGVTQSPTHLIKTRGQQVTLRCSPKSGH---------DTVSWYQQALGQGP---Q
FIFQYY-E--EEER---QRGNFPDRFSGHQFP-NYSSELN------VN-ALLLGDSALYL
CASSL-----
>V88RF-CABD02352510.1-trbv |(11938, 12229)|2.98560803841|(1.000,0.993,0.993)|1
----NAGVTQTPKFHILKTGQSMTLQCAQDMNH---------GYMSWYRQDPGMGL---R
LIYYSA-A--AGTI---DKGEVPNGYNVSRLN-TEDFLLR------PV-SAAPSQTSVYF
CASSY-----
>V89RF-CABD02352511.1-trbv |(3159, 3459)|3.0|(1.000,1.000,1.000)|1
--HTGAGVSQSPRYKVTKRGQDVTLRCDPISSH---------ATLYWYQQALGQGP---E
FLTYFN-Y--EAQP--DKSGLPNDRFSAERPE-GSNSTLT------IQ-RTEQRDSAMYL
CASSL-----
>V90RF-CABD02352511.1-trbv |(16331, 16627)|2.88644684157|(0.990,0.996,0.920)|1
--PVDAGVTQSPTHLIKMRGQQVTLRCSPKSGH---------DTVSWYQQALGQGP---Q
FIFEYY-E--KEER---GRGNFPDRFSARQFP-NYSSELN------VN-PLLMGDSALYL
CASSL-----
>V91RF-CABD02352511.1-trbv |(25598, 25898)|3.0|(1.000,1.000,1.000)|1
--HADTGVSQDPRHKITKRGQNVTFRCDPISEH---------NQLYWYRQTLGQGP---E
FLTYFQ-N--EAQL--EKSRLLSDRFSAERPK-GSFSTLE------IQ-RTEQGDSAMYL
CASSL-----
>V92RF-CABD02352512.1-trbv |(835, 1135)|3.0|(1.000,1.000,1.000)|1
--HADTGVSQDPRHKITKRGQNVTFRCDPISEH---------NQLYWYRQTLGQGP---E
FLTYFQ-N--EAQL--EKSRLLSDRFSAERPK-GSFSTLE------IQ-RTEQGDSAMYL
CASSL-----
>V93RF-CABD02352512.1-trbv |(7390, 7687)|2.98974003277|(0.999,0.991,1.000)|1
--SVAAGVIQSPRHLIKEKRETATLKCYPIPRH---------DTVYWYQQGPGQDP---Q
FLISFY-E--KMQS---DKGSIPDRFSAQQFS-DYHSELN------MS-SLELGDSALYF
CASSL-----
>V94RF-CABD02352513.1-trbv |(1353, 1650)|3.0|(1.000,1.000,1.000)|1
--HMDAGITQSPRHKVTEIGTPVTLRCHQTENH---------RYMYWYRQDPGHGL---R
LIHYSY-G--VKDT---DKGEVSDGYSVSRSK-TEDFLLT------LE-SATSSQTSVYF
CAISE-----
>V95RF-CABD02352514.1-trbv |(8741, 9041)|3.0|(1.000,1.000,1.000)|1
--LIEAGVVQSPRYKIIEKKQPVAFWCNPISGH---------NTLYWYRQNLGQGP---E
LLIRYE-N--EEAV--DDSQLPKDRFSAERLK-GVDSTLK------IQ-PAELGDSAVYL
CASSL-----
>V96RF-CABD02352514.1-trbv |(14343, 14643)|3.0|(1.000,1.000,1.000)|1
--HTDAGVIQSPRHEVTEMGQEVTLRCKPISGH---------NSLFWYRQTMMRGL---E
LLIYFN-N--NVPI--DDSGMPKDRFSAKMPN-ASFSTLK------IQ-PSEPRDSAVYF
CASSL-----
>V97RF-CABD02352515.1-trbv |(2177, 2477)|2.99696400065|(1.000,1.000,0.997)|1
--HTDAGVIQSPRHEVTEMGQEVTLRCKPISGH---------NSLFWYRQTMMRGL---E
LLIYFN-N--NVPI--DDSAMPKDRFSAKMPN-ASFSTLK------IQ-PSEPRDSAVYF
CASSL-----
>V99RF-CABD02352520.1-trbv |(3657, 3957)|2.99280401921|(1.000,0.993,1.000)|1
--HIEAGVTQFPSHSVIEKGQTVTLRCDPISGH---------DNLYWYRRVMGKEI---K
FLLHFV-K--ESKQ--DESGMPNNRFLAERTG-GTYSTLK------VQ-PAELEDSGVYF
CASSQ-----
>V100RF-CABD02352520.1-trbv |(8783, 9080)|2.84973453214|(0.979,0.964,0.921)|1
--HGDAMVIQNPRYQVTQFGKPVTLSCSQNLNH---------NIMYWYQQKSSQAP---K
LLFHYY-D--KDF---NNEADTPDNFQSRRPN-TSFCFLD------IS-SPGLGDAAMYL
CATSR-----
>V101RF-CABD02352525.1-trbv |(5450, 5746)|2.99392000218|(1.000,0.996,0.998)|1
--LSNAGVMQNPRHLVRRRGQEARLRCSPMKGH---------SHVYWYRQLPEEGL---K
FMVYLQ-K--ENII--DESGMPKERFSAEFPK-EGPSILR------IQ-QAVRGDSAAYF
CASS------
>V102RF-CABD02352526.1-trbv |(2325, 2622)|3.0|(1.000,1.000,1.000)|1
--TVDGGITQSPKYLFRKEGQNVTLNCEQNLNH---------DAMYWYRQDPGQGL---R
LIYYSQ-I--VNDF---QKGDIAEGYSVSREK-KESFPLT------VT-SAQKNPTAFYL
CASSI-----
>V103RF-CABD02352526.1-trbv |(20182, 20482)|2.89992541189|(0.996,0.987,0.933)|1
--STDTKVTQRPRLLVKASEQKAKMDCVPIKGH---------SYVYWYRKKLEEEL---K
FLVYFQ-N--EEII--QKAEIINERFLAQCSK-NSSCTLE------IQ-STESGDTALYF
CASSK-----
>V104RF-CABD02352526.1-trbv |(29242, 29542)|2.99280401921|(1.000,1.000,0.993)|1
--SFHAKVTQTPGHLVKGKGQKTKMDCTPEKGH---------TFVYWYQQNQNKEF---M
LLISFQ-N--EQVL--QETEMHKKRFSSQCPS-NTPCSLA------IL-SSEPGDTALYL
CASSQ-----
>V105RF-CABD02352529.1-trbv |(2516, 2814)|2.89807219335|(0.994,0.998,0.925)|1
--SMDADVTQTPRNRITKTGKRIMLECSQTKGH---------DRMYWYRQDPGLGL---R
LIYYSF-D--VKDI---NKGEISDGYSVSRQA-QAKFSLS------LE-SATPNQTALYF
CATSD-----
>V106RF-CABD02352529.1-trbv |(16657, 16954)|2.7523576557|(0.976,1.000,0.845)|1
--LMEADIYQTPRYLVIGTGKKITLECSQTMGH---------DKMYWYQQDPGMEL---H
LIHYSY-G--VNST---EKGGLSSESTVSRIR-TEHFPLT------LE-SARPSHTSQYL
CASSE-----
>V107RF-CABD02352531.1-trbv |(24520, 24817)|2.99699200002|(0.999,1.000,0.998)|1
--PLEAQVTQNPRYLITVTGKKLTVTCSQNMNH---------EYMSWYRQDPGLGL---R
QIYYSI-N--VEAI---DKGDVPEGYNVSRKE-KRNFPLI------LE-SPSPNQTSLYF
CASSL-----
>V108RF-CABD02352532.1-trbv |(6479, 6776)|2.99799600001|(0.999,1.000,0.999)|1
--LVDVKVTQSSRYLVKRMGEKVFLECVQDMDH---------ENMFWYRQDPGLGL---R
LIYFSS-D--VKMK---EKGDIPEGYSVSREK-KERFSLI------LE-STSTNQTSMYL
CASSL-----
>V109RF-CABD02377004.1-trbv |(3098, 3398)|2.98896000066|(0.997,0.994,0.998)|1
--SMDTKVTQRPRLLVKANEQKAKMDCVPIKRH---------SYVYWYHKTLEEEL---K
FLIYFQ-N--EEII--QKAEIINERFSAQCPQ-NSPCTLE------IQ-STESGDTARYF
CANSK-----
>V110RF-CABD02377004.1-trbv |(12039, 12339)|2.33223794651|(0.868,0.717,0.838)|1
--CFHAKVTQTPGYLVKGKGRKTKMYCTPENGH---------TFVCWYQQNQNKEF---M
FLISFQ-N--EQVL--QETEMHKKRFSPQCPK-NPPCSLA------IL-SSEPGDTALYL
CASSP-----
>V111RF-CABD02377005.1-trbv |(21584, 21875)|2.97999600001|(0.993,0.994,0.993)|1
--LMEAEIYQTPRYHVIGTGKKITLECSQTMGH---------DKMYWSRSRNGITP---H
PPFL---W--VNST---EKGDLSSESTVSRIR-IEHFPLT------LE-SASPSHTSQYL
CASSE-----
>V112RF-CABD02377030.1-trbv |(2304, 2607)|2.98178801933|(0.997,0.995,0.990)|1
-SVFSAVISQKPSRDICQRGTSMTIQCQVNSQV---------TMMFWYCQQPGQSV---T
LIATANQG--SEAT--YESGFVIDKFPISCPN-LTFSTLT------VS-NRSPEDSSIYL
CSVE------
>V113RF-CABD02105639.1-trdv |(1838, 2144)|2.98974003277|(0.999,1.000,0.991)|-1
RGMLCDKVTQSSPDQTVASGSEVVLLCTYDTVY-----SN--PDLFWYRIRPDYSF---Q
FVFYGD-N--SGSQ---AADFTQGRFSVKHILTQKAFHLV------IS-PVRTEDSATYY
CAF-------
>V114RF-CABD02117385.1-ighv |(3331, 3640)|3.0|(1.000,1.000,1.000)|-1
-AHSQVQLVQSG-AEVKKPGASVKVSCKASGYTF----TG--YAMHWVRQAPGQRL---E
WMGWINT--GNGNT--KYSQKFQGRVTITRDTSASTAYME------LS-SLRSEDTAVYY
CAR-------
>V116RF-CABD02117395.1-ighv |(10192, 10503)|2.99899600001|(1.000,1.000,0.999)|-1
-VQCEVQLVESG-GGLVQPGRSLRLSCVASGFTF----DD--YAMHWVRQAPGKGL---E
WVSGISW--NSGST--GYADSVKGRFTISRDNAKNSLYLQ------MN-SLRAEDTALYY
CAKD------
>V117RF-CABD02117395.1-ighv |(23380, 23689)|2.96904987297|(0.997,0.999,0.975)|-1
-VHSQVQLVQSG-AEVRKPGSSVKVSCKLSGGTF----SS--YAISWVRQAPGQGL---E
WMGGFIP--ILGTA--NYAQKFQGRVTITADESTSTAYME------LS-SLRSEDTAVYY
CAR-------
>V118RF-CABD02117398.1-ighv |(503, 809)|3.0|(1.000,1.000,1.000)|-1
-VQCEVQLVESE-GGLVQPGGSLRLSCAASGFTF----SS--YNMHWVRQAPGKGL---E
WVSAIGT--G-GDT--YYPGSVKGRFTISRENAKNSLYLQ------MN-SLRAEDTAVYY
CAR-------
>V119RF-CABD02117416.1-ighv |(7584, 7893)|3.0|(1.000,1.000,1.000)|-1
-VQCEVQLVESG-GGLVQPGGSLRLSCAASGFTF----SD--YYMSWVRQAPGKGL---E
WVSGINW--NGGST--GYADSVKGRFTISRNNAKNSLYLQ------MN-SLRAEDTALYY
CAR-------
>V120RF-CABD02117419.1-ighv |(907, 1216)|3.0|(1.000,1.000,1.000)|-1
-VQCEVQLVESG-GGLVKPGGSLRLSCAASGFTF----SS--YWMSWVRQAPGKGL---E
WVSVISS--SGRTT--YYADSVKGRFTISRDNAKNSLYLQ------MN-SLRAEDTAVYY
CAR-------
>V121RF-CABD02117420.1-ighv |(2703, 3012)|3.0|(1.000,1.000,1.000)|-1
-VQCDVQLVESG-GGLVQPGGSLRLSCAASGFTF----SS--YGMSWVRQAPGKGL---E
WVSYISS--SSSYI--YYADSVKGRFTISRDNAKNSLYLQ------MN-SLRAEDTAVYY
CAR-------
>V122RF-CABD02117421.1-ighv |(1503, 1818)|3.0|(1.000,1.000,1.000)|-1
-AQCEVQLVESG-GGLVKPGGSLRLSCAASGFTF----SN--YYMEWVRQAPGKGL---E
WVGFIRTKAKGGTT--EYAASVKGRFTISRDDSKSIAYLQ------MN-SLKTEDTAVYY
CTR-------
>V123RF-CABD02117430.1-ighv |(2094, 2408)|2.87067958581|(0.998,0.927,0.969)|-1
-VLSQVTLKESG-PVLVKPTETLTLTCTVSGFSL----SNARMGVSWIRQPPGKAL---E
WLAHIFS---NDEK--SYSTSLKSRLTISKDTSKSQVVLT------MT-NMDPVDTATYY
CAWI------
>V124RF-CABD02117431.1-ighv |(1312, 1621)|2.997|(0.999,0.999,0.999)|-1
-AHSQVQLVQSG-SEVKKPGASVKVSCKASGYTF----TS--YGMNWVRQAPGQGL---E
WMGWINT--YTGNP--TYAQGFTGRFVFSMDTSVSTAYLQ------IS-SLKAEDTAMYY
CAR-------
>V125RF-CABD02117438.1-ighv |(419, 731)|2.91900449196|(0.977,0.995,0.951)|-1
-VLSQVQLQQWG-PGLVKPSETLSLTCAVYGGSI----SSSDYYWSWIRQPPGKGL---E
WIGLINY---VRST--NYNPSLKSRVTISVDTSKNQFSLK------LS-SVTAADTAVYY
CAR-------
>V126RF-CABD02117439.1-ighv |(2063, 2375)|2.97826023048|(0.996,0.983,1.000)|-1
-VLSQVQLQQWG-TGLVKPSETLSLTCAVYGGSI----SSDGYYWSWIRQPPGKGL---E
WIGYIYY---SGST--YYNPSLKSRVTISVDTSKNQFSLK------LS-SVTAADTAVYY
CAR-------
>V127RF-CABD02117442.1-ighv |(1416, 1725)|2.99899600001|(1.000,0.999,1.000)|-1
-VQCQVQLVESA-GGVVQPGRSLTLSCTASGFTF----SS--YGMHWVRQAPGKGL---E
WVAVISY--DASNK--YYAASVKGRFTISRDNSKNTLYLQ------MN-SLRAEDTAVYY
CAK-------
>V128RF-CABD02117444.1-ighv |(7682, 7991)|3.0|(1.000,1.000,1.000)|-1
-VQCQVQLVESG-GGVVQPGRSLRLSCTASGFTF----SS--YGMHWVRQAPGKGL---E
WVAVISY--DASNK--YYADSVKGRFTISRDNSKNTLYLQ------MN-SLRAEDTAVYY
CAK-------
>V129RF-CABD02117445.1-ighv |(8585, 8891)|2.90591671673|(0.987,0.985,0.942)|-1
-VLSQVQLQQWG-AGVVKPSETLSLTCAVYGGSF----S--GYYWNWIRQPPGKGL---E
WIGRISY---DGST--NYNPSLKSRVTISVDTSKNQFSLK------LS-SVTAADTAVYY
CAR-------
>V130RF-CABD02117454.1-ighv |(1407, 1716)|2.92051834815|(0.997,0.995,0.941)|-1
-VLSQVQLQESG-PGLVKPSETLSLTCVVSGGSI----SS-SNWWSWVRQPPGKGL---E
WIGEIYH---SGSP--NYNPSLKSRVTISVDKSKNQFSLK------LS-SVTATDTAVYY
CAR-------
>V131RF-CABD02117457.1-ighv |(5100, 5407)|2.98521630725|(1.000,1.000,0.986)|-1
-VQCEVQLVESG-GGLVQPEGSLKLSCAASGFTF----SS--YAMDWVRQAPGKGL---E
WVAHIWND--GSQK--YYADSVKGRFTISRDNSKSMLYLQ------MD-SLKAEDTAMYY
CT--------
>V132RF-CABD02117463.1-ighv |(7715, 8026)|2.89512485441|(0.997,1.000,0.921)|-1
-VQCEVQLVESG-GGVVQPGRSLRLSCAASGFTF----DD--YAMHWVRQAPGKGL---E
WVSRISWG--GGST--YYADSVKGLFTISRDNSKISLYLQ------MN-SLRAEDTALYY
CAKD------
>V133RF-CABD02117467.1-ighv |(8162, 8468)|2.93450772085|(0.995,0.949,0.999)|-1
-AQCEVQLVESG-GGLVQPGGSLRPSCAASGFAF----SS--YVLHWVRRAPGKGL---E
WVSAIGT--GG-DT--YYADSVMGRFTISRDNAKKSLYLQ------MN-SLIAEDMAVYY
CAR-------
>V134RF-CABD02117467.1-ighv |(15696, 16005)|3.0|(1.000,1.000,1.000)|-1
-AHSQVQLVQSG-AEVKKPGASVKVSCKASGYTF----TS--YYMHWVRQAPGQGL---E
WMGIINP--SGGST--SYAQKFQGRVTMTRDTSTSTVYME------LS-SLRSEDTAVYY
CAR-------
>V135RF-CABD02117467.1-ighv |(19808, 20117)|2.99696400065|(1.000,0.997,1.000)|-1
-AYSQMQLVQSG-AEVKKTGASVKVSCKASGYTF----TY--RSLHWVRQAPGQAL---E
WMGWITP--YNGNT--NYAQKFQDRVTITRDRSMSTAYME------LS-SLRSEDTAVYY
CAR-------
>V136RF-CABD02117471.1-ighv |(687, 996)|2.99799200002|(1.000,0.999,0.999)|-1
-VQCDVQLVQSG-GGLVQPGGSLRLSCAASGFTF----SS--YWMHWVRQAPGKGL---E
WVANIKK--DGSGK--YYVDSVKGRFTISRDNAKNSLYLQ------MN-SLRAEDTAVYY
CAR-------
>V137RF-CABD02117473.1-ighv |(12286, 12601)|3.0|(1.000,1.000,1.000)|-1
-VQCEVQLVESG-GGLVKPGGSLRLSCTASGFTF----GD--YTMSWVRQAPGKGL---E
WVGFIRSKAYGGTT--EYAASVKGRFTISRDDSKSIAYLQ------MN-SLKTEDTAVYY
CTT-------
>V138RF-CABD02117475.1-ighv |(8201, 8508)|2.92354496459|(0.982,0.991,0.954)|-1
-VCAEVQLVQSA-AEVKRPGESLRISCKGSGYSF----TS--YWIGWVRQMPGKGL---E
WMGIIYP--GDSDT--RYSPSFQGQVTISADSSISTAYLQ------WS-SLKASDTAMYY
CA--------
>V139RF-CABD02117477.1-ighv |(2704, 3013)|2.99899600001|(1.000,1.000,0.999)|-1
-VQCEVQLVESG-GGLVQPGGSLRLSCVASGFTF----SS--YAMSWVRQAPGKGL---E
WVSTISS--TGGST--WYPGSVKGRFTISRDNSKNTLYLQ------MN-SLRAEDTAVYY
CAK-------
>V141RF-CABD02117482.1-ighv |(11133, 11445)|2.99899600001|(1.000,0.999,1.000)|-1
-VLSQVQLQESG-PGLVKPSQTLSLTCTVSGGSI----SSGSYYWSWIRQPPGKGL---E
WIGYIYYS---GST--NYNPSLKSRVTISVDTSKNQFSLK------LS-SVTAADTAVYY
CAR-------
>V142RF-CABD02117482.1-ighv |(15935, 16229)|2.99494800078|(1.000,0.998,0.997)|-1
------QLVQSG-PEVKKPGASVKVSCKASGYTF----TS--SAMQWVRQAPGQGL---E
WIGWIIV--GSGNT--NYAQKFQGRVTITRDTSTSTAYME------LS-SLRSEDMAVYY
CAA-------
>V143RF-CABD02117487.1-ighv |(1480, 1789)|3.0|(1.000,1.000,1.000)|-1
-VQCEVQLVESG-GGLVQPGGSLRLSCAASGFTF----SS--YHMSWVRQAPGKGL---E
WVSVIYS--DGSST--YYAASVKGRFTISRDNSKNTLYLQ------MN-SLRAEDTAVYY
CAR-------
>V144RF-CABD02117492.1-ighv |(7493, 7808)|2.9969280013|(0.997,1.000,1.000)|-1
-VQCEVQLVESG-GGLVQPGGSLRLSCAASGFTF----SN--YYKSWVCQAPGKGL---E
WVRFIRNKANGGTT--EYTTSVKGRFTISRDDSKSITYLQ------MN-SLKTEDTAVYY
CSR-------
>V145RF-CABD02117494.1-ighv |(3416, 3731)|3.0|(1.000,1.000,1.000)|-1
-VQCEVQLLESG-GGLVQPGGSLRLSCAASGFTF----SD--HYMDWVRQAPGKGL---E
WVGRIRNKANSYTT--EYAASVKGRFTISRDDSKNSLYLQ------MN-SLKTEDTAVYY
CTT-------
>V146RF-CABD02117499.1-ighv |(3042, 3351)|3.0|(1.000,1.000,1.000)|-1
-VQCEVQLLESG-GGLVQPGGSLRLSCAASGFTF----SS--YWMHWVRQAPGKGL---E
WVSRINS--DGSST--SYADSVKGRFTISRDNAKNTLYLQ------MN-SLRAEDTAVYY
CAR-------
>V147RF-CABD02117506.1-ighv |(3288, 3597)|2.99899600001|(1.000,0.999,1.000)|-1
-TYSQVQLVQSG-HEVKQPGASVKVSCKASGYSF----TS--YGMNWVRQAPGQGL---E
WMGWFNT--YTGNP--TYAQGFTGRFVFSMDTSVSTAYLQ------IS-SLKAEDTAMYY
CAR-------
>V148RF-CABD02117545.1-ighv |(2488, 2803)|2.97908440501|(0.999,0.984,0.997)|-1
-VQCEVQLVESG-GGLVQPGGSLRLSCAASGFTF----SD--HYRSWVRQAQGKGL---E
LVGLIRNKANSYTT--EYAASGKGRFTISRGDSKNTLYLQ------MS-SLKTEDLAVYY
CAR-------
>V149RF-CABD02117766.1-ighv |(420, 729)|2.99899600001|(1.000,1.000,0.999)|-1
-AHSQVQLVQSG-AEVKKPGASVKVSCKASGYTF----TD--YYMHWVRQAPGQGL---E
WMGRINP--NSGGT--NYTQKFQGRVTMTRDTSISTAYME------LS-RLRSEDTATYY
CAR-------
>V150RF-CABD02117767.1-ighv |(2221, 2530)|2.99698000014|(0.998,0.999,1.000)|-1
-AHSQVQLVQSG-AEVKKPGASVKVSCKASGYTF----TG--YYMHWVRQAPGQGL---E
WMGWINP--NSGGT--NYAQKFQGRVTMTRDTSISTAYME------LS-RLRSEDTATYY
CTR-------
>V151RF-CABD02136430.1-ighv |(23813, 24119)|3.0|(1.000,1.000,1.000)|-1
-VQCEVHLVQSG-GGLVQPGGSLRLSCAGSGFTF----SS--HAMHWVRQAPGKGL---E
WVSAIGT--G-GGT--YYADSVKGRFTISRDNAKNSLYLQ------MN-SLRAEDMAVYY
CAR-------
>V152RF-CABD02136430.1-ighv |(37941, 38248)|3.0|(1.000,1.000,1.000)|-1
-AQCEVQLVESG-GGLVQPGGSLRLSCAASGFTF----SN--HYTSWVLQAPGKGL---E
WVSYISG--DSDYT--NYADSVKGRFTISRDNAKNSLYLR------MN-SLRAEDTAVYY
CV--------
>V153RF-CABD02196508.1-igkv |(4447, 4759)|2.90237531587|(0.987,0.979,0.944)|-1
-CNGDIVLTQSPASLAMSPGQRATITCRASECVSFLG--I--NLIHWYQQKPGQPP---K
LLIYQ-------AS--NKDIGVPARFSGSG--SGTDFTLT------IN-PVEANNTAKYY
CLQSKNFP--
>V154RF-CABD02196513.1-igkv |(3814, 4114)|2.99899200002|(0.999,1.000,1.000)|-1
-AKCDIQMTQSPSTLSASVGDRVTITCRASQGI------S--KLLAWYQQKPGKAP---K
LLIYA-------AS--SLESGVPSRFSGSG--SGTEFTLT------IS-SLQPDDFATYY
CQQHSSTP--
>V155RF-CABD02196515.1-igkv |(8253, 8553)|2.99174403277|(1.000,0.992,1.000)|-1
-ARCDIRMTQSPSSLSASVGDRVTITCRASQGI------R--NDLGWYQQKPGKAP---K
ILIYA-------AS--SLQSGVPSRFSGSG--SGTDFTLT------IS-SLQPEDFATYY
CLQDYNYP--
>V157RF-CABD02196521.1-igkv |(5557, 5857)|3.0|(1.000,1.000,1.000)|-1
-ARCDIQMTQSPSSLSASVGDRVTITCRASQGI------S--KWLAWYQQKPGKAP---K
RLIYA-------AS--SLESGVPSRFSGSG--SGTEFTLT------IS-SLQPEDFATYY
CLQYNSYP--
>V158RF-CABD02196542.1-igkv |(3007, 3305)|2.75900890101|(0.997,0.848,0.999)|-1
-SRGEIVLTQSPDFQSVTPKEKVTITCRASQSIG--------SSLHWYQQKPDQSP---K
LLIKY-------AS--QSISGVPSRFSGSG--SGTDFTLT------IN-SLEAEDAATYY
CQQSSSL---
>V159RF-CABD02196545.1-igkv |(4900, 5202)|2.89476289014|(0.985,0.932,0.989)|-1
-SSGDIVMTQTPLSLPVTNGEPASISCRSSQSLVHS-DGN--TYLNWIQQRPGQPP---R
LLIYK-------VS--NRFSGVPDRFSGSG--AGTDFTLK------IS-RVEAEDVAVYY
CTQG------
>V160RF-CABD02196547.1-igkv |(2239, 2541)|2.99698000014|(1.000,0.998,0.999)|-1
-SSGDVVMTQSPLSLPVTLGQPASISCRSSQSLVYS-DGN--TYLNWFQQKPGQSP---R
RLIYK-------VS--NRDSGVPDRFSGSG--SGTDFTLE------IS-RVEAEDVGVYY
CMQG------
>V161RF-CABD02196553.1-igkv |(790, 1090)|3.0|(1.000,1.000,1.000)|-1
-ARCDIQLTQSPTSLSASVGDRVTITCQASQGI------S--NNLAWYQQKPGKVP---K
LLIYS-------AS--SLQSGVPSRFSGSG--SGTDFTLT------IS-SLQPEDVATYY
CQRTYNAP--
>V162RF-CABD02196556.1-igkv |(192, 492)|3.0|(1.000,1.000,1.000)|-1
-ARCDIQMTQSPSSLSASVGDRVTITCRASQSV------S--NYLSWYQQKPGKAP---K
LLIYA-------AS--SLQSGVPSRFSGSG--SGTDFTLT------IS-SLQPEDFATYY
CQHGYGTP--
>V163RF-CABD02196559.1-igkv |(8610, 8928)|2.98742416586|(1.000,0.988,1.000)|-1
-SSGDIVMTQTPLSLPVTPGQPASISCRSSQSLLDSDDGN--TYLYWYLQKPGQSP---Q
LLIYE-------VS--NRASGVPDRFSGSG--SGTDFTLK------IS-RVEAEDVGVYY
CMQSRELP--
>V164RF-CABD02196901.1-igkv |(2814, 3114)|2.99696400065|(1.000,0.997,1.000)|-1
-DRCDIQMTQSPSSLSASVGGRVTITCRASQGI------S--NNLNWYQQKPGKTP---K
LLIYA-------AS--SLQSGIPSRFSDSG--SGTDYTLT------IS-SLQPEDFAAYY
CQQSDSTP--
>V165RF-CABD02196902.1-igkv |(2361, 2661)|2.34396416178|(0.950,0.919,0.700)|-1
-AKCAIQMTQSPSSLPASTGDRVTITCQASQGI------G--SYLNWYQQKPGKSP---K
LLIYY-------AS--YLQSGIPSRFSGSG--SGTDFTLT------ID-CLQPEDFATYY
CEQSYGTP--
>V167RF-CABD02337338.1-trgv |(1057, 1370)|2.98070483945|(1.000,1.000,0.982)|-1
-SQKSSNLEGRTKSVTRQTGSSAEITCDLTVT------NT--FYIHWYLHQEGKAP---Q
RLLYYD-V--STARDVLESGLSSGKYYTHT-PRRWSWILR------LQ-NLIENDSGVYY
CATWD-----
>V169RF-CABD02337341.1-trgv |(2313, 2626)|2.97002987349|(0.999,0.996,0.977)|-1
-SQKSSNLEGRTKSVIRQTGSSAEITCDLDGG------ST--GYIHWYLHQEGKAP---Q
RLQYYD-S--YNSKVVLESGVSPGKYYTYTS-TRKNLRLI------LR-NLIENDSGVYY
CATWD-----
>V171RF-CABD02379427.1-igkv |(3027, 3327)|3.0|(1.000,1.000,1.000)|-1
-ARCDIQMTQSPSSLSASVGGRVTITCRASQGI------S--NNLNWYQQKPGKTP---K
LLIYA-------AS--SLQSGIPSRFSDSG--SGTDYTLT------IS-SLQPEDFAAYY
CQQSDSTP--
>V172RF-CABD02379503.1-igkv |(6201, 6501)|3.0|(1.000,1.000,1.000)|-1
-ARCDIQMTQSPSSLSASVGGRVTITCRASQDI------S--NNLNWYQQKPGKTP---K
LLIYA-------AS--SLQSGIPSRFSDSG--SGTDYTLT------IS-SLQPEDFAAYY
CQQSDSTP--
>V0RF-AQIB01018214.1-trgv |(163723, 164036)|2.98184466791|(1.000,1.000,0.983)|1
-SQKSSNLEGRTKSVTRPTGSSAEITCDLPEV------SS--FYIHWYLHQEGKAP---Q
RLLYYD-T--SNSRVVLESGISSGKYDSYGS-TRRNLRLI------LR-NLIENDSGVYY
CANWD-----
>V1RF-AQIB01018215.1-trgv |(1470, 1783)|2.95229855551|(1.000,1.000,0.959)|1
-SQKSSNLEGRTKSVTRPTGSSAEITCDFSGD------SN--FYIHWYLHQEGKAP---Q
RLLYYD-V--SNSRDVLESGLSPGKYYTHT-RKRWSWILI------LR-NLIENDSGVYY
CANWN-----
>V2RF-AQIB01018217.1-trgv |(6282, 6595)|2.95096883512|(1.000,1.000,0.958)|1
-SQKSSNLEGRTKSVTRPTGSSAEITCDLPEV------SS--FYIHWYLHQEGKAP---Q
RLLYYD-S--SNSRVVLESGISSGKYNSYE-STRRSLRLR------LQ-NLIENDSGVYY
CANWD-----
>V3RF-AQIB01144236.1-igkv |(33225, 33525)|2.99899600001|(1.000,1.000,0.999)|1
-ARCDIQMTQSPSSLSASVGDRVTITCRASQGI------N--KELSWYQQKPGKAP---T
LLIYA-------AS--SLQTGVPSRFSGSG--SGTDFTLA------IS-SLQPEDVATYY
CLQDYTTP--
>V6RF-AQIB01144236.1-igkv |(99005, 99323)|2.99696400065|(1.000,1.000,0.997)|1
-SSGDIVMTQTPLSLPVTPGEPASISCRSSQSLLDSDDGN--TYLDWYLQKPGQSP---Q
LLIYE-------VS--NRASGVPDRFSGSG--SDTDFTLK------IS-RVEAEDVGVYY
CMQTIEYP--
>V7RF-AQIB01144237.1-igkv |(7567, 7881)|2.85975363732|(0.958,0.923,0.987)|1
-TSGDILLTQTPLSLPVTPGQLASISCRSSQSLLHS-NGN--TYLHWYLQEPGQSP---Q
LLIYE-------VS--NRASGVPDRFSGSG--SDTDFTLK------IN-LVEAEDVGVYY
CMQLHNGP--
>V8RF-AQIB01144237.1-igkv |(12519, 12834)|2.30503232921|(0.966,0.988,0.662)|1
-SSGDIVMTQTPLSLPVTLGEQASISCRSSQSLVYS-DGK--TYLNWYLQKPGQSP---Q
LLMYL-------VS--KRASGVPDRFSGRG--SGTDFTLK------IS-RVEAEDVGVYY
CMQALRSP--
>V9RF-AQIB01144237.1-igkv |(20593, 20893)|2.82824248645|(0.995,0.971,0.900)|1
-ARCDIQMTQSLSSLSASVGDRVTITCRASQGI------N--NELAWYQQKPGKAP---M
LLLYS-------GS--SLHTGVPSRFSGSG--SGTDFTLA------IS-SLQPEDVAPYY
CLQDYTTP--
>V10RF-AQIB01144237.1-igkv |(28737, 29052)|2.96515566288|(1.000,0.974,0.994)|1
-SSGDIVMTQTPLSLPVTPGEPASISCRSSQSLLDS-YGY--TNLNWYLQKPGQSP---Q
LLIYL-------GS--NRASGVPDRFSGSG--SGTDFTLK------IS-GVEAEDVGVYY
CMQGIQLP--
>V11RF-AQIB01144240.1-igkv |(12918, 13233)|2.99698000014|(1.000,0.998,0.999)|1
-TSGDIVMTQTPFSLPVNPGEPASISCRSSQSLSDS-DGY--TYLYWYLQKPGQSP---Q
LLIYL-------GS--NRASGVPDRFSGSG--SGTDFTLK------IS-RVEAEDVGVYY
CMQGIQLP--
>V12RF-AQIB01144242.1-igkv |(6923, 7238)|2.90089450166|(0.993,0.976,0.943)|1
-SSGDIVMTQTPLSLPVTPGEPASISCRSSQSLLHS-DGY--TYLYWYVQKPGHSP---Q
LLIYL-------VS--NRASGVPDRFSGSG--SGTDFTLK------IS-RVEAEDVGVYY
CLQGIQLP--
>V13RF-AQIB01144242.1-igkv |(18230, 18530)|3.0|(1.000,1.000,1.000)|1
-ARCDIQMTQSPSSLSASVGDRVTITCQGSQSL------S--NFLNWYQQKPGKIP---K
LLIYR-------AS--SLQSGIPSRFSGSG--SGTDYTLT------IS-SLQPEDFATYY
CQQGYSYP--
>V14RF-AQIB01144242.1-igkv |(33676, 33991)|2.99696400065|(1.000,0.997,1.000)|1
-TSGDIVMTQTPLSLPVTPGEPASISCRSSQSLLHS-NGY--TYLDWYVQKPGQSP---Q
LLIYL-------VS--SRASGVPDRFSGSG--SGTDFTLK------IS-RVEAEDVGVYY
CMQGTQLP--
>V15RF-AQIB01144243.1-igkv |(9275, 9590)|2.98759608|(0.999,0.989,1.000)|1
-TSGDIVMTQIPLSLPVTPGEPASISCRSSQSLLHS-GGK--TYLYWYLQKPGQSP---Q
LLIYE-------LS--NRASGVPDRFSGSG--SGTDFTLK------IS-GVEAEDVGVYY
CMQGIQLP--
>V16RF-AQIB01144243.1-igkv |(18759, 19059)|3.0|(1.000,1.000,1.000)|1
-ARCDIQMTQSPSSLSASVGDRVTITCQASQGI------T--NDLAWYQQKPGETP---K
LLIYE-------AS--SLQSGIPSRFSGSG--SGTDFTLT------IS-SLQPEDFATYY
CQHYYSTP--
>V17RF-AQIB01144243.1-igkv |(52384, 52684)|2.99899200002|(0.999,1.000,1.000)|1
-ARCDIQMTQSPSSLSASVGDRVTISCRASQNI------Y--SNLAWYQQKPGKTP---K
LLIYA-------AS--SLQSGIPSRFSGSG--SGTDFTLT------IS-SLQPEDYATYY
CQHHYGTP--
>V18RF-AQIB01144244.1-igkv |(12759, 13074)|2.98742416586|(1.000,0.988,1.000)|1
-SSGDIVMTQTPLSLPVTPGEPASISCRSSQSLLHS-DGR--TYLYWYLQKPGQPP---R
LLIYT-------VS--NRFSGVPDRFSGSG--SGTDFTLK------IS-RVEAEDVGVYY
CMQALQNP--
>V19RF-AQIB01144247.1-igkv |(9074, 9389)|2.96607224753|(0.998,0.971,1.000)|1
-SIGDIVMTQTPLSLPVTPGEPASISCRSSQSLLHS-NGN--TYLYWYLQKPGQPP---Q
LLIYR-------VS--NRFSGVPDRFSGSG--SGTDFTLK------IS-RVEAEDVGVYY
CMQALQTP--
>V20RF-AQIB01144251.1-igkv |(6848, 7148)|2.99899200002|(0.999,1.000,1.000)|1
-ARCDIQMTQSPSSLSASVGDRVTITCHASQGI------S--NWLAWYQQKPGKAP---K
LLIYY-------AS--NLETGVPSRFSGSR--SGTDFTVT------IS-SLQPEDIATYY
CQQYDNFP--
>V22RF-AQIB01144257.1-igkv |(11968, 12268)|2.99498000014|(0.998,1.000,0.997)|1
-ARCDIQMTQSPSSLSASVGDRVTITCRASQGI------N--NYLSWYQQKPGKAP---K
PLIYY-------AS--SLETGVPSRFSGSG--SGPDYTLT------IS-SLQPEDIATYY
CQQYDNFP--
>V23RF-AQIB01144258.1-igkv |(1398, 1700)|2.92969465218|(0.969,0.970,0.993)|1
-FSADVVMTQSPLSLPVTPGQPASITCRSSQSLLHS-NGN--TYLNWFLQKPGQPP---R
RLIYT-------VS--NRDSGVPDRFSGSG--AGTDFTLK------IS-RVEAEDVGVYY
CMQV------
>V24RF-AQIB01144263.1-igkv |(12287, 12602)|2.90863937084|(0.979,0.942,0.994)|1
-SSGDVVMTQSPLSLPVTLGQPVSISCRSSQSLVHS-DGK--TYLNWLQQKPGQPP---R
LLIYQ-------VS--NRYSGVPDRFSGSG--AGTDFTLK------IS-RVEAEDVGVYY
CMQGTHFP--
>V25RF-AQIB01144263.1-igkv |(20713, 21015)|2.96692188321|(0.999,0.977,0.993)|1
-SSGDVVMTQSPLSLPVTPGQPASISCRSSQSLVHS-DGK--TYLNWFQQKPGQPP---R
RLIYQ-------VS--SRDSGVPDRFSGSG--AGTDFTLK------IS-RVEAEDVGVYY
CVQG------
>V26RF-AQIB01144263.1-igkv |(50626, 50941)|2.98960007999|(1.000,0.990,1.000)|1
-SSGDIVMTQTPLSLPVTLGEPASISCRSSQSLVYS-DGK--TYLDWYLQKPGQSP---Q
LLIYY-------GS--NRASGVPDRFSGSG--SGTDFTLK------IS-SVEAEDVGVYY
CMQAIQTP--
>V27RF-AQIB01144263.1-igkv |(59031, 59331)|2.9339635143|(0.996,0.977,0.966)|1
-TRCAIQMTQSPSSLSASVGDRVTITCWASQSI------G--SNLAWYQQKPGKVP---K
LLIYA-------AS--TLQSEVPSRFSGSG--SGTDFTLS------IS-SLQPEDVATYY
CQKCDSAH--
>V28RF-AQIB01144263.1-igkv |(96224, 96526)|2.99696400065|(1.000,1.000,0.997)|1
-STGDVVMTQSPLSLPVTPGEPASISCRSSQSLLHS-SGN--TYLSWFQQKPGQSP---R
RLIYK-------VS--NRDSGVPDRFTGSG--AGTDFTLK------IS-RVEAEDVGVYY
CMEG------
>V29RF-AQIB01144264.1-igkv |(29331, 29633)|2.99696400065|(1.000,1.000,0.997)|1
-STGDVVMTQSPLSLPVTPGEPASISCRSSQSLLHS-SGN--TYLSWFQQKPGQSP---R
RLIYK-------VS--NRDSGVPDRFTGSG--AGTDFTLK------IS-RVEAEDVGVYY
CMEG------
>V30RF-AQIB01144264.1-igkv |(45678, 45976)|2.85165453485|(0.999,0.895,1.000)|1
-SKGEIVLTQSPAFRSVTLKEKVTITCQASQSIG--------SSLHWYQQKPDQSP---K
LLIKY-------AS--QSISGVPSRFSGSG--SGTDFTLT------IN-SLEAEDAATYY
CQQSSSF---
>V31RF-AQIB01144264.1-igkv |(72133, 72421)|3.0|(1.000,1.000,1.000)|1
-----IVLTQSPATLSLSPGETATLSCRASQSVG--------SSLAWYQQKPGQVP---R
LLIYG-------AS--SRATGIPDRFSGSG--SGTEFTLT------IS-SLQPEDFAVYY
CQKYSSSP--
>V32RF-AQIB01144264.1-igkv |(77620, 77920)|2.83094825589|(0.979,1.000,0.887)|1
-VRCDIQMTQSPSFLSASVGDRVTITCQASQSI------S--NDLAWYQQKPGKSP---T
LLICD-------AT--NLHTGVPSWFSGSG--SGADYYLT------IS-SLELEDFAAYY
CQQEYSYP--
>V33RF-AQIB01144264.1-igkv |(103470, 103785)|2.44523664903|(0.804,0.805,0.842)|1
-SSGDIVMIQTPLSLPVTPGEPASISCRSSQNLLHS-DGN--TYLHWYLQKPGQSP---Q
LLIYG-------GS--NRFAGVPDRFSGSG--SATDFTMK------IS-RVEAKDVGVYY
CMQGIQFP--
>V34RF-AQIB01144265.1-igkv |(9151, 9443)|2.85344780448|(0.999,0.896,1.000)|1
-SRGDIVMTQSPAFVSVTPGEKVTITCQASEGIS--------NYLHWYQQKPDQAP---K
LLIQY-------AS--QSISGVPSRFTGSG--SGTDFTFT------IS-SLEVEDAATYY
CQQGN-----
>V35RF-AQIB01144265.1-igkv |(25389, 25680)|2.99396400065|(0.999,0.996,0.999)|1
----DIQMTQSPSSLSASVGDRVTITCQASQSF------S--SSLAWYQQKPGKAP---K
LLIYA-------AS--SLQSGVPSRFSGSK--AGTDFTLT------IS-SLQPEDVATYY
CQQYYSTP--
>V36RF-AQIB01144265.1-igkv |(40570, 40862)|3.0|(1.000,1.000,1.000)|1
-AKCDIQMTQSPSSLSASVGDRVTITCRASQTI------S--SYLAWYQQKPGKVP---K
LLIYA-------AS--SLESGIPSRFSGSG--SGTEFTLT------IS-SLQPEDFATYY
CQQHN-----
>V37RF-AQIB01144265.1-igkv |(60992, 61284)|2.99498400013|(0.999,0.997,0.999)|1
-ARCDIQMTQSPSSLSASVGDRVTVTCRASQGI------S--NYLSWYQQEPGKAP---K
LLIYA-------AS--SLESGVPSRFSGSG--SGTEFTLT------IS-SLQPEDFATYY
CLQHN-----
>V38RF-AQIB01144265.1-igkv |(75665, 75964)|3.0|(1.000,1.000,1.000)|1
-TTGEIVMTQSPATLSLSPGERATLSCRASQSVS--------SYLAWYQQKPGQAP---R
LLIYG-------AS--SRATGIPDRFSGSG--SGTEFTLT------IS-SLEPEDVGVYY
CQQYNNWN--
>V39RF-AQIB01144265.1-igkv |(84906, 85206)|2.99899600001|(1.000,1.000,0.999)|1
-ARCDIQMTQSPSSLSASVGDRVTITCRASQGI------S--NYLNWYQQKPGKAP---K
LLIYS-------AS--RLQSGVPSRFSGSG--SGTEFTLT------IS-SLQPEDFATYY
CEQFKNYL--
>V40RF-AQIB01144269.1-igkv |(1727, 2027)|2.92916627772|(0.965,0.987,0.980)|1
-STGEIVMTQSPATLSLSPGETTTLSCSASQSVG--------SYLAWYQQKPGQAP---K
LLIHS-------AY--FRATGIPDRFSGSG--SRTVFTLT------IS-SLEPEDVGVYY
CQQYNDLP--
>V41RF-AQIB01144269.1-igkv |(40447, 40747)|2.99593600205|(1.000,1.000,0.996)|1
-ARCDIQLTQSPSSLSASVGDRVTITCRASQGI------S--SYLAWYQQKPGKAP---K
LLIYD-------AS--NLQSGVPSRFSGSG--SGTEFTLT------IS-SLQPEDFATYY
CQQRNSLP--
>V42RF-AQIB01144273.1-igkv |(1759, 2059)|2.99798400013|(1.000,1.000,0.998)|1
-ARCDIQMTQSPSSLSVSVGDRVTITCRASQGI------S--NYLSWYQQKPGKAP---K
LLIYS-------AS--SLESGVPSRFSGSG--SGTDYTLT------IS-SLQPEDFAAYY
CLQYQSIP--
>V43RF-AQIB01144273.1-igkv |(12272, 12572)|2.92774192532|(0.987,0.978,0.965)|1
-TTREIVFTQSPATLSLSPGERATLSCRASQSV------G--SSLAWYQQKSGQAP---R
LLVYH-------AS--SRATGIPARFSGSG--SGTDFTLT------IS-SLEPEDVGVYY
CQKYNDWP--
>V44RF-AQIB01144273.1-igkv |(55407, 55707)|2.99696400065|(1.000,1.000,0.997)|1
-ARCDIQMTQSPSSLSASVGDRVTITCRASQGI------S--NALAWYQQKPGKVP---K
LLIYA-------AS--SLQSGLPSGFSGSG--SGTEFTLT------IS-SLQPEDFATYY
CQQGYSTP--
>V45RF-AQIB01144273.1-igkv |(67090, 67390)|3.0|(1.000,1.000,1.000)|1
-ARCDIQMTQSPSSLSASVGDRVTITCRASQGI------S--NNLAWYQQKPGKAP---K
LLIYD-------AT--TLQSGVPSRFSGSG--SGTEFTLT------IS-SLQPEDFATYY
CQQYNSYP--
>V46RF-AQIB01144273.1-igkv |(86428, 86728)|2.98492000218|(0.997,0.995,0.993)|1
-TTGEIVMTQSPATLSLSPGETATLSCKTSQSV------G--SKLAWYQQKPGQAP---R
LLIYG-------AS--SRATGIPARFSGSG--SGTDFTLA------IS-SLEPEDVGAYY
CQETSSLS--
>V47RF-AQIB01144274.1-igkv |(43133, 43433)|2.98688400513|(0.998,0.993,0.996)|1
-ARCDIQMTQSPSSLSASVGDTVTITCPASQGI------S--SYLNWYQHKPGKAP---K
LLIYY-------AT--TLQSGVPSRFSGSG--SGTEFTLT------IS-SLQPEDFAAYY
CQQYKSLP--
>V48RF-AQIB01144274.1-igkv |(49577, 49877)|3.0|(1.000,1.000,1.000)|1
-ARCDIQMTQSPSSLSASVGDKVTITCHASQGI------S--SWLAWYQQKPGKAP---K
LLIYK-------AS--SLQSGVPSRFSGSG--SGTDFTLT------IS-SLQPEDFATYY
CQQITSAP--
>V49RF-AQIB01144274.1-igkv |(65782, 66082)|2.42720899438|(0.991,0.709,1.000)|1
-TTGEIVMTQSPATLALSPGERATLSCRTSQSVS--------SRLAWYQQKPGQAP---R
LLIYD-------AS--SRATGIPDRFSGSG--SGTEFTLT------IS-SLEPEDVGVYY
CQQDYSWP--
>V50RF-AQIB01144276.1-igkv |(25002, 25302)|2.99698000014|(0.998,0.999,1.000)|1
-ARRDIQMSQSPSSLSASVGDRVTITCHASQGI------S--SWLAWYQQKPGKAP---K
LLIYK-------AS--SLQSGVPSRFSGSG--SGTDFTLT------IS-SLQPEDFATYY
CLQYDSNP--
>V51RF-AQIB01144276.1-igkv |(29444, 29742)|2.63325330366|(0.997,0.792,0.999)|1
-TTGEIVMTQSPATLALSPGERATLSCRASQSVS--------SRLAWYQQKPGQAP---R
LLIYD-------AS--SRATGIPDRFSGSG--SGTDFTLT------IS-SLEPEDVAVYF
CQQESNW---
>V52RF-AQIB01144276.1-igkv |(40183, 40483)|2.99899600001|(1.000,1.000,0.999)|1
-ARCDIQMTQSPSSLSASVGDRVTITCQASQGI------S--NYLAWYQQKPGKAP---K
LLIYY-------AS--TLQSGVPSRFSGSG--SGTEFTLT------IS-SLQPEDFATYY
CQQHNSNP--
>V53RF-AQIB01144276.1-igkv |(56521, 56821)|3.0|(1.000,1.000,1.000)|1
-ARCDIQMTQSPSSLSASVGDRVTITCQASQGI------S--NYLAWYQQKPGKAP---K
PLIYK-------AS--TLESGVPSRFSGSG--SGTEFTLT------IS-SLQPEDFATYY
CQQRNSYP--
>V54RF-AQIB01144282.1-igkv |(3113, 3400)|2.91316849053|(0.995,0.936,0.996)|1
-----TVVTQSPATLSLSPGERATVSCRTSQSVS--------NRLAWYQQKPGQAP---R
LLIYG-------AS--NRATGIPARFSGSG--SGTDFTLT------IS-SLELEDAAVYY
CQQDNDWK--
>V55RF-AQIB01144282.1-igkv |(46328, 46640)|2.99499200002|(0.999,0.998,0.998)|1
-CNGDIVLTQSPASLAVSPGQKATITCRASESVSLFG--I--NFIHWYQQKPGQPP---K
LLIYQ-------AS--NKDTGVPARFSGSG--SGTDFTLT------IN-PVEADDAANYY
CLQSKTSP--
>V56RF-AQIB01144282.1-igkv |(64268, 64559)|2.98967205249|(1.000,0.991,0.999)|1
-----IVLTQSPTSMAVSQGERVTISCTASSSIS-----T--SYLHWYQQKPGFPP---R
LLVYT-------TS--SLASGVPARFSGSG--SGTSYTLT------IS-SMEAEDAANYY
CQQGSSIP--
>V58RF-AQIB01146122.1-iglv |(12217, 12527)|2.97896052424|(0.998,0.982,1.000)|1
-SWAEVVFTQPH-SVSGSPGQTVTISCTRSSGSI---D-S--SFVYWYQQRPGSAP---T
TVIYN-------DN--RRPSGVPDRFSGSIDSSSNSASLT------IS-GLKSEDEADYY
CQSDDSSG--
>V59RF-AQIB01146122.1-iglv |(69507, 69814)|3.0|(1.000,1.000,1.000)|1
-SWAQSVLTQPP-SVSGAPGQRVTISCTGSSSNI---G-G--YNVHWYQQLPGTTP---K
LLIYG-------NN--QRPSGVSDRFSGSK--SGTSASLT------IT-GLQSEDEADYY
CQSYDSSLS-
>V61RF-AQIB01146122.1-iglv |(92188, 92498)|2.64889678962|(0.998,0.805,0.985)|1
-SLSQPVLTQPT-SLSASPGASARLTCTLRSGIS---VGS--YRVLWYQQKPGNPP---R
YLLNYH-T--DSDK--DQGSGVPSRFSGSKDASANAGILL------IS-GLQSEDEADYY
CAI-------
>V62RF-AQIB01146122.1-iglv |(97013, 97322)|2.99899600001|(1.000,0.999,1.000)|1
-CWAQSVLTQPP-SASGAPGQSVTISCSGSSSNI---G-S--NSVYWYQQFPGTAP---K
LLIYY-------SN--QRPSGVPDRFSGSK--SGTSASLT------IS-GLQSEDEADYY
CAAWDDSLSG
>V63RF-AQIB01146122.1-iglv |(110604, 110914)|2.68164226946|(0.996,0.987,0.818)|1
-SLSQPVLTQPA-SLSASPGASASLTCTFSGGIN---VAG--YYIYWYQQKPGSPP---R
YLLRYK-S--DSEK--HQGSGVPSRFSGSKDASANTGILR------IS-GLQSEDEADYY
CAI-------
>V64RF-AQIB01146122.1-iglv |(126866, 127176)|2.93246510429|(0.999,0.959,0.982)|1
-SLSQPVLTQPT-SLSASPGASVRLTCTLRSGIS---VGG--YNIHWYQQKPGSPP---R
YLLYYY-S--DSNK--GQGSGVPSRFSASKDASANAGILL------IS-GFQSEDEADYY
CTT-------
>V65RF-AQIB01146122.1-iglv |(131665, 131974)|3.0|(1.000,1.000,1.000)|1
-SWAQSVLTQPP-SASGAPGQSVTISCSGSSSNI---G-S--NYVSWYQQLSGKAP---K
LLIYK-------NS--QRPSGVPDRFSGSK--SGTSASLT------IS-GLRSEDEADYY
CAAWDDSLNG
>V66RF-AQIB01146122.1-iglv |(149998, 150308)|2.97912824764|(1.000,0.993,0.987)|1
-SLSQPVLTQPA-SLSASPGASARLSCTLSSGIN---VGS--YSIYWYQQKPGSPP---R
YLLYYY-S--DSSK--GQGSGVPSRFSGSKDASANAGLLL------IS-GLQSEDEADYY
CAI-------
>V67RF-AQIB01146122.1-iglv |(159131, 159440)|2.99899600001|(1.000,1.000,0.999)|1
-SWAQSVLTQPP-SVSGAPGQRVTISCTGSSSNI---G-G--YYVQWYQQLSGTAP---K
LLIYG-------NN--QRPSGVSDRFSGSK--SGTSASLT------IT-GLQSEDEADYY
CETWDNSLNG
>V68RF-AQIB01146122.1-iglv |(164963, 165270)|2.98670803341|(0.992,1.000,0.995)|1
-SWAQSVLTQPP-SVSGAPGQRVTISCTGSSSNI---G-G--YDVHWYQQLPGTTP---K
LLIYD-------NN--KRPSGVSDRFSGSK--SGTSASLT------IT-GLQTEDEADYF
CQSYDSSLG-
>V69RF-AQIB01146122.1-iglv |(187790, 188100)|2.94390279134|(0.998,0.987,0.964)|1
-SLSQPVLTQPA-SLSASPGASASLTCTFSGGIN---VAG--YYIYWYQQKPGSPP---R
YLLWYK-S--DSDK--HQGSGVPSRFSGSKDASANTGILR------IS-GLQSEDEADYY
CAI-------
>V70RF-AQIB01146123.1-iglv |(2181, 2490)|2.99596000066|(1.000,0.997,0.999)|1
-SWAQSVLTQPR-SASEATRKSITISCSGSSSNI---G-S--NYVSWYQQLPGTAP---K
LLIYY-------ND--WRASGVSDRFSGSK--SGTSASLA------IS-GLQTEDEADYY
CAAWDDSLSG
>V72RF-AQIB01146133.1-iglv |(25439, 25742)|3.0|(1.000,1.000,1.000)|1
-SWAQSALTQSP-SVSGSPGQSVTISCTGTSSDV---GGY--NYVSWYQQHPGKAP---K
LMIYE-------VS--KRPSGVSDRFSGSK--SGNTASLT------IS-GLQAEDEADYY
CCSYTTS---
>V73RF-AQIB01146133.1-iglv |(37913, 38216)|2.94015412024|(0.998,0.971,0.976)|1
-SAASYDLTQPH-SVSVSPGQTARITCGGD--D----IGS--EAVHWYQQKPAQAP---V
LVIYD-------NS--DRPSGIPERFSGSN--SGNTATLT------IS-GVEAGDEADYY
CQVWDISSDH
>V76RF-AQIB01146136.1-iglv |(1665, 1968)|2.99899600001|(1.000,0.999,1.000)|1
-SWAQSAPTQPR-SVSGSPGQSVTISCTGTSSDI---GGY--NYVSWYQQHPGTAP---K
LMIYG-------VS--NRPSGVSDRFSGSK--SGNTASLT------IS-GLQAEDEADYY
CCSYTTS---
>V77RF-AQIB01146137.1-iglv |(9886, 10183)|2.9949000027|(0.996,0.999,1.000)|1
-SVASYELTQPP-SVSVSPGQTARITCSGD--V----LKE--NYADWYQQKPGQAP---V
LLIYE-------DS--KRPSGIPERFSGST--SGDTTTLT------IS-STLSEDGADYY
CFSGDENN--
>V78RF-AQIB01146137.1-iglv |(18233, 18536)|2.98764005313|(1.000,0.991,0.997)|1
-SAVSYELTQPR-SVSVSPGQTARITCGGD--S----IGS--KYVHWYQQKPAQAP---V
LVIYD-------NS--NRPSGIPERFSGSN--SGNTATLT------IS-GVQAGDEADYY
CQVWDSSSKH
>V79RF-AQIB01146137.1-iglv |(25864, 26167)|2.99899600001|(1.000,1.000,0.999)|1
-SVVSSELTQDP-AVSVALGQTVRITCQGD--S----LRS--SYASWYQQKPGQAP---V
LVVYG-------NN--NRPSGIPERFSGSS--SGNTASLT------IT-GAQVEDEADYY
CNSWDSSGNH
>V80RF-AQIB01146138.1-iglv |(15714, 16017)|2.994|(0.998,0.998,0.998)|1
-SWAQAALTQPP-SVSKSLGQSVTISCTGTSSDI---AAY--NDVSWYQQHPGTAP---R
LLIYS-------VS--NRPSGVSDCFSGSK--SGNTASLT------IS-GLQAEDEADYY
CCSYRSG---
>V81RF-AQIB01146138.1-iglv |(24129, 24432)|2.98764005313|(1.000,0.991,0.997)|1
-SAVSYELTQPR-SVSVSPGQTARITCGGD--S----IGS--KYVHWYQQKPAQAP---V
LVIYD-------NS--NRPSGIPERFSGSN--SGNTATLT------IS-GVQAGDEADYY
CQVWDSSSKH
>V82RF-AQIB01146140.1-iglv |(2757, 3067)|2.8844976111|(1.000,0.915,0.998)|1
-SWAQAALTQPH-SVSGSPGQSVTISCTGTSSDI---GGY--NRVSWYQQHPGKAP---K
LMIYE-------VS--NRPSGVSDRFSGSK--SGNTASLT------IS-GLQAEDEADYY
CSSYASSSN-
>V84RF-AQIB01146140.1-iglv |(26014, 26324)|2.98989600501|(0.998,0.999,0.993)|1
-SWAQAALTQPP-SVSGSPGQSVTISCTGTSSDV---GGY--NYVSWYQQHPGKAP---K
LMIYE-------VN--KRPSGVSDRFSGSK--SGNTASLT------IS-GLQAEDEADYY
CSSYAGSNT-
>V85RF-AQIB01146141.1-iglv |(2344, 2645)|2.99696400065|(1.000,0.997,1.000)|1
-SVASYELTQPP-SVSVSPGQTARITCSGD--A----LPD--NYAYWFQQKPGQSP---V
LIIYE-------DS--KRPSGIPERFSGSS--SGTVATLT------IS-GAQVEDEADYY
CYSADSSGN-
>V87RF-AQIB01146141.1-iglv |(13491, 13794)|3.0|(1.000,1.000,1.000)|1
-SWAQAAPTQSP-SVSGSAGQSVTISCTGTSSDI---GGY--NRVSWYQQHPGKAP---K
LMIYE-------VS--KRPSGVSDRFSGSK--SGNTASLT------IS-GLQAEDEADYY
CSSYAGS---
>V88RF-AQIB01146141.1-iglv |(50602, 50912)|2.91414228761|(0.994,0.942,0.989)|1
-SWAQSAPIQSP-SVSGSLGQSVTISCTGTSSDI---GRY--NYVSWYRQQPGTTT---K
LTMYN-------VN--TRPSGVSDRFSGSK--SGNTASLT------IS-GLQAEDEADYY
CSSYETSDT-
>V89RF-AQIB01153480.1-ighv |(7301, 7610)|2.99398000014|(0.999,0.998,0.997)|1
-VLSQLQLQESG-PGLVKPSETLSLTCAVSGGSI----S--SYWWGWIRQAPGKGL---E
WIGNIYGS--GGST--EYNPSLKSRVTISKDTSKNQFSLK------LS-SVTAADTAVYY
CAR-------
>V90RF-AQIB01153481.1-ighv |(29869, 30184)|3.0|(1.000,1.000,1.000)|1
-VQCEVQLVESG-GGLIQPGGSLRLSCAASGFTF----SD--YAMSWVRQASGKGL---E
WVGYIRSKSNNYAT--EYAASVKGRFTISRDDSKNTLYLQ------MS-GLKTEDTAVYY
CTI-------
>V91RF-AQIB01153482.1-ighv |(4668, 4983)|3.0|(1.000,1.000,1.000)|1
-VQCEVQLVESG-GGLVQPGGSLRLSCAASGFTF----SD--HYMQWVRQAPGKGL---E
WVGFIRSKAYGGTA--EYAASVKGRFTISRDDSKSITSLQ------MN-SLKTEDTAVYY
CTR-------
>V92RF-AQIB01153482.1-ighv |(18678, 18987)|3.0|(1.000,1.000,1.000)|1
-VQCEVQLVESG-GGLVQPGGSLKLSCAASGFTF----GD--YAMSWVRQAPGKGL---E
WVSSISN--TGKTT--YYADSVKGRFTISRDNAKNSLSLQ------MN-SLRAEDTAVYY
CAR-------
>V93RF-AQIB01153482.1-ighv |(23774, 24083)|2.97955704207|(1.000,0.981,1.000)|1
-VQGEVQLVESG-GGLAKPGGSLRLSCAASGFTF----SN--YYMHWVRQAPGKGL---E
WVSSINT--GGGST--YYADSVKGRFTISRDNSKNTLSLQ------MD-SLRAEDTAVYY
CAK-------
>V94RF-AQIB01153484.1-ighv |(24203, 24512)|2.80197252412|(0.940,0.924,0.939)|1
-AQSQVQLVQPG-AEMRKPGDSVKVSCKASGYTF----TN--HDVDWVRQAPGQGP---E
WMGGINT--NTGGT--SCAQTFQGRVTMTRDTTTSTAFME------LS-SLRSEDTAVYY
CAR-------
>V95RF-AQIB01153484.1-ighv |(33458, 33767)|2.99899200002|(0.999,1.000,1.000)|1
-AHSQVQLVQSG-AEIKQPGASVKLSCKASGYTF----TS--YYMHWVRQAPGQGL---E
WIGLISP--YNGNK--GYAQNFQGRVTITTDTSTSTGYME------LS-SLRSEDTAVYY
CTR-------
>V96RF-AQIB01153485.1-ighv |(161, 470)|2.95330075255|(0.984,0.971,1.000)|1
-VQGEVQLVESG-GGLAKPGGSLRLSCAASGFTF----SD--YHMHWVRQAPGKGL---Q
WVSAINS--GGGST--WYADSVKGRFTISRENAKNTLYLQ------MD-SLRAEDTAVYY
CAK-------
>V97RF-AQIB01153486.1-ighv |(413, 728)|3.0|(1.000,1.000,1.000)|1
-VQCEVQLVESG-GGLVQPGGSLRLSCAASGFTF----SD--YAMHWVRQAPGKGP---E
WVGFIRSKAYGGTA--EYAASVKGRFTISRDDSKNTAYLQ------MN-SLKTEDTAVYY
CTI-------
>V98RF-AQIB01153489.1-ighv |(27642, 27951)|2.96958408012|(0.994,0.992,0.984)|1
-AHSEVQLVQSG-AEVRKPGASVKVSCKVSGYTL----TE--LSMHWVRQAPGKGL---E
WMGGVDP--VYGET--IHAEKFQGRVTMTEDTSTDTAYME------LS-SLRSEDTAVYY
CAR-------
>V99RF-AQIB01153491.1-ighv |(2235, 2549)|2.27752052158|(0.976,0.923,0.682)|1
-VLSQVTLKESG-PALVKPTQTLTLTCTFSGFSL----TTSGMGVGWIRQPPGKAL---E
WLAHIYW---DDDK--RYSPSLKSRLTISKDTSKNQVVLT------MT-NMDPVDTATYY
CARR------
>V100RF-AQIB01153491.1-ighv |(11513, 11822)|2.95866265282|(0.996,0.993,0.972)|1
-VHSQVQLVQSG-AEVKKPGASVKLSCKASGFTL----GS--YAISWVRQAPGQGL---E
WMGGIIP--LVGIT--NYAQKFQGRVTITADTSTTTAYME------LS-SLRSEDTAVYY
CAR-------
>V101RF-AQIB01153491.1-ighv |(20597, 20906)|2.83758265101|(0.954,0.999,0.903)|1
-AHSQVQLVQSG-AEVEKPGASVKVSCKATGYTF----TN--YFMQWVRQAPGQGL---E
WMGWVYL--GNGNT--NYVQKFQGRVTMTRDVSTNTAYME------LG-SLRSKDMAVYY
CAR-------
>V102RF-AQIB01153492.1-ighv |(6792, 7104)|3.0|(1.000,1.000,1.000)|1
-VLSQVQLQESG-PGLVKPSETLSLTCAVSGGSI----S--SSYWSWIRQSPGKGL---E
WIGDIYGS-SGGST--SYNPSLKSRVTMSVDTSKNQFSLK------LS-SVTAADTAVYY
CAR-------
>V103RF-AQIB01153498.1-ighv |(778, 1087)|2.94426990764|(0.998,1.000,0.954)|1
-AHSQVQLVQSG-AEVKKPGSSVKVSCKASGYTF----TD--YYMQWVRQAPGQGL---E
WMGRINP--KTGGT--DYAQKFQGRVTMTRDTSTSTAYME------LS-SLRSEDTAVYY
CAR-------
>V104RF-AQIB01153501.1-ighv |(4567, 4876)|3.0|(1.000,1.000,1.000)|1
-VQCEVQLVESG-GGLVQPGASLRLSCAASGFTF----GD--YAMSWVRQAPGKGL---E
WVSYISS--ASSTI--YYADSVKGRFTISRDNAKNSLYLQ------MN-SLKTEDTAVYY
CTR-------
>V105RF-AQIB01153501.1-ighv |(18760, 19071)|2.99096400065|(0.998,0.995,0.998)|1
-VQCEVQLVESG-GGVVQPEGSLRLSCAASRFTF----DD--YAMSWVRQAPGKGL---E
WVSVISWT--RRST--YYADSVKGRFTISRDNTKNSLYLQ------MD-RLRAEDTALYY
CAKD------
>V106RF-AQIB01153504.1-ighv |(6983, 7290)|2.95482001102|(0.986,0.989,0.980)|1
-AHSQVQLVLSR-AEVEKPGASVKVSCKASGYTF----TS--YFMQWVGQAPGQGR---E
WMGWVYL--GNGNT--NYEQKFQGRVTITRDVSTSTTYME------LS-TLRSEDMAVYY
CA--------
>V107RF-AQIB01153506.1-ighv |(6406, 6713)|2.95482001102|(0.986,0.989,0.980)|1
-AHSQVQLVLSR-AEVEKPGASVKVSCKASGYTF----TS--YFMQWVGQAPGQGR---E
WMGWVYL--GNGNT--NYEQKFQGRVTITRDVSTSTTYME------LS-TLRSEDMAVYY
CA--------
>V108RF-AQIB01153507.1-ighv |(14778, 15088)|2.98580001921|(0.998,0.997,0.991)|1
-ALSQVQLQESG-PGVVKPSETLSLTCAVSGYSI----SS-GYYWGWIRQPPGKGL---E
WIGSIYGS--GGSN--YLNPSLKSRVTLSVDTSKNQFSLK------LS-SVTATDTAVYY
CA--------
>V109RF-AQIB01153507.1-ighv |(24714, 25023)|3.0|(1.000,1.000,1.000)|1
-VQCEVQLVESG-GGLVQPGGSLRLSCAASGFTF----SS--YWMHWVRQAPGKGL---E
WVSLINS--DGGST--RYADSVKGRFTISSENAKNSLYLQ------MN-SLRAEDTAVYY
CAR-------
>V110RF-AQIB01153507.1-ighv |(32453, 32768)|2.99899600001|(1.000,0.999,1.000)|1
-VQCEVQLVQSG-GGLVQPGGSLRLSCAASGFTF----SE--YAMAWVRQASGKGL---E
WVGRIRSKSNNYGT--AYAASVKGSFTISRDDSKNTLYLQ------MS-SLKTEDTAVYY
CTR-------
>V111RF-AQIB01153507.1-ighv |(42168, 42483)|2.98570803341|(0.997,1.000,0.989)|1
-VQCEVQLVESG-GGLVQPGGSLKLSCAASGFTF----SN--YYMDWVRQAPGKGL---E
WVGRIRNKANSHTT--EYAASVKDRFTISRDDSKNTLYLQ------MS-GLKTEDKAVYY
CAR-------
>V112RF-AQIB01153509.1-ighv |(6082, 6394)|3.0|(1.000,1.000,1.000)|1
-VQCEVQLVESG-AGLVQPGGSLRLSCAASGFTF----SD--YYMDWVRQAPGKGL---E
WVSRISS-GSGSST--YYPDSVKGRFTISRDNSKNTLYLQ------MN-SLRAEDTAVYY
CAR-------
>V113RF-AQIB01153509.1-ighv |(13578, 13893)|2.99289600501|(0.999,0.994,1.000)|1
-VQCEVQLVESG-GGLVQPGGSLRLSCAASGFTF----SN--HYMHWVRQAPGKGQ---E
WVGFIRNKANGGTA--EYAASVKGRFTISRDDSKSITSLQ------MN-SLKTEDTAVYY
CTR-------
>V114RF-AQIB01153509.1-ighv |(29997, 30306)|3.0|(1.000,1.000,1.000)|1
-VQCEVQLVESG-GGLVQPGGSLRLSCAASGFTF----GD--YDMSWVRQAPGKGL---E
WVSFISYT--GKTT--YYADSVKGRFTISRDNAKNSLSLQ------MN-SLRAEDTAVYY
CTR-------
>V116RF-AQIB01153509.1-ighv |(45356, 45665)|2.99192000218|(0.998,0.994,1.000)|1
-AHSEVQLVQSG-AEVKKPGASVNVSCKASGYTF----TD--YYLHWVRQAPGKGL---E
WMGRIDP--ENGES--KYAQKFQDRLTMTADTSTDTAYME------LS-SLRSEDTAVYY
CAT-------
>V117RF-AQIB01153511.1-ighv |(7980, 8295)|3.0|(1.000,1.000,1.000)|1
-VQCEVQLVESG-RGLVQPGGSLRLSCAVSGFTF----SD--HYMSWVREAPGKGL---E
WVGFMRNKANGGRT--EYAASVKGRFTISRDDSKSIASLQ------MS-SLKTEDTAVYY
CAR-------
>V118RF-AQIB01153511.1-ighv |(11094, 11404)|2.99696400065|(1.000,1.000,0.997)|1
-VQCEVQLVESG-GGLVQPGGSLRLSCVASGFTF----SD--HYMDWVRQAPGKGL---E
WVSSISTG-SGSTT--LYPDSVKGRFTISRDNAKNTLYLQ------MN-SLRADDTAVYY
CA--------
>V119RF-AQIB01153511.1-ighv |(40798, 41107)|2.99899200002|(0.999,1.000,1.000)|1
-VQCEVQLVESG-GGLAKPGGSLRLSCAASGFTF----SS--YGMHWVRQAPGKGL---E
WISAINS--GGSNT--WYTDSVKGRFTISRDNSKNTLSLQ------MN-SLRAEDTAVYY
CAK-------
>V121RF-AQIB01153517.1-ighv |(601, 913)|2.99596800026|(1.000,0.998,0.998)|1
-VLSQVQLQQWG-GGLVKPSETLSLTCAVYGGSI----S-GYYYWSWIRQPPGKGL---E
WIGNIDGN--SGST--NYNPSLKSRVTISKDTSKNQFSLK------LS-SVTAADTAVYY
CAR-------
>V122RF-AQIB01153522.1-ighv |(387, 699)|2.93197652411|(0.983,0.967,0.983)|1
-VLSQVQLQESG-PGLLKPSETLSLTCAVSGGSI----SG-GYGWGWIRQPPGKGL---E
WIGSIYTS--SGNT--YYNPSLKSRVTISTDTSNNQFSLK------LN-SVTAADTAVYY
CAR-------
>V123RF-AQIB01153537.1-ighv |(1707, 2018)|2.99899600001|(1.000,1.000,0.999)|1
-VQCEVQLVESG-GGVVQPGGSLRLSCAASGFTF----DD--YGMHWVRQAPGKGL---E
WVSDISW--DGDST--YYADSVKGRFTISRDDAKNSLYLQ------MD-SLRAEDTALYY
CAKD------
>V124RF-AQIB01153538.1-ighv |(4311, 4620)|2.99899600001|(1.000,0.999,1.000)|1
-AQSQVQLVQSG-AEVKKPGASVKLSCKASGYTF----TS--YNINWVRQAPGQVL---E
WMGWINP--SNGNT--GYAQKFQGRVTMTRDTSTSTAYME------LS-SLISEDTAVYY
CAR-------
>V125RF-AQIB01153538.1-ighv |(21429, 21738)|2.95577334931|(0.997,0.983,0.978)|1
-AHSQVQLVQSG-VEVKKPGASVKVSCKASGYTF----SI--YAISWVRQAPGQGL---E
WMGAIIP--LVGIT--NYAQKFQGRVTITADTSTSTAYME------LS-SLRSEDTAVYY
CAR-------
>V126RF-AQIB01153538.1-ighv |(31031, 31340)|2.89186884012|(0.982,0.940,0.977)|1
-AHSQVQLVQSG-AEGKKPGSSVKVSCKASGYTF----TN--SAVQWVRQSPEQGL---E
WIGVIII--GNDNT--GYAQKFQGRVTITMDVSMSTAYVE------LS-SLRSEDMAVYY
CAA-------
>V127RF-AQIB01153541.1-ighv |(19819, 20128)|2.94826014987|(0.984,0.973,0.992)|1
-AHSQEQLVQSG-AEVKKPGASVKVSCKASGYIF----TG--YIISWLRQAPGQGF---E
WMGGINP--SDGST--SYAQKFQGRVTMTRDTSTSTVYVE------LS-SLRSEDTAVYY
CAA-------
>V128RF-AQIB01153541.1-ighv |(23910, 24219)|2.98851611711|(1.000,0.989,1.000)|1
-AHSEMQLVQSE-AEVKKPGASVKVSCKVSGYTF----TY--PYLHWVRQTPGQGL---E
WMGWITP--YNGNT--NYAQKFQDRVTITRDRSMSTAYME------LS-SLRSEDTAVYY
CAR-------
>V129RF-AQIB01153543.1-ighv |(7057, 7368)|3.0|(1.000,1.000,1.000)|1
-VQCEVQLVESG-GGVVQPGGSLRLSCAASGFTF----DD--YAMGWVRQAPGKGL---E
WVSGISW--NSGST--GYADSVKGRFTISRDNAKNSLYLQ------MN-RLRAEDTALYY
CAKD------
>V130RF-AQIB01153550.1-ighv |(2975, 3287)|2.94704014784|(0.963,0.996,0.997)|1
-VLSQVQLQESG-PGLVKPSETLSLTCAVSGYSI----SS-AYDWSWIRQPPGKGL---E
LIGYIYGN--SAST--SYNPSLKSRVTISKDTSKNQFSLK------LS-SVTAADTAVYY
CAR-------
>V131RF-AQIB01153553.1-ighv |(7961, 8270)|2.99696400065|(1.000,0.997,1.000)|1
-VQGEVQLVESG-GGLAKPGGSLRLSCSASGFTF----SD--YYMHWVRQASGKGL---E
WVSRINTG--GGST--WYADSVKGRFTISRENAKNTLYLQ------MD-SLRAEDTAVYY
CAR-------
>V132RF-AQIB01153553.1-ighv |(15671, 15986)|2.99899600001|(1.000,1.000,0.999)|1
-VKCEAQLMESG-GGLVQPGGSLRLSCAASGFTF----SD--HYMQWVRQAPGKGL---E
WVGLIRNKVDGETT--DYAASVKGRVTISRDESKSITYLQ------MN-NLKTEDTAVYY
CAR-------
>V133RF-AQIB01153553.1-ighv |(22330, 22639)|2.98960007999|(1.000,0.990,1.000)|1
-VQGEVQLVESG-GGLVQPGGSLRLSCAASGFTF----SS--YAMHWARQAPGKGL---E
WVSYISS--GGGNT--YYADSVKGRFTISRDNSKNTLSLQ------MN-SLRAEDTAVYY
CAR-------
>V134RF-AQIB01153555.1-ighv |(4669, 4978)|2.91224200392|(0.998,0.998,0.933)|1
-VCAEVQLVQSG-AEVKRPGESLRISCKTSGYSF----TS--SWISWVRQMPGKGL---E
WMGRIYP--GDSDT--EYSPSFQGQVTISADKSISTTYLQ------WS-SLKASDTATYY
CAK-------
>V135RF-AQIB01153555.1-ighv |(23903, 24218)|3.0|(1.000,1.000,1.000)|1
-VQCEVQLVESG-GGLVQPGGSLRLSCAASGFTF----SD--HYMDWVRQAPGKGL---K
WVGRIRNKANSYTT--EYAASVKGRFTISRDDSKNTLYLQ------MS-SLKTEDTAVYY
CTR-------
>V136RF-AQIB01153555.1-ighv |(39959, 40271)|2.83639966024|(0.996,0.998,0.888)|1
-VQCEVQLVESG-GGLVQPEGSLRLSCVASGFTF----SN--YDMAWVRQAPGKGL---E
WVSRISSP-SGSST--YYPDSVKGRFTISRENAKNTLYLQ------MN-SLRAEDTAVYY
CAR-------
>V137RF-AQIB01153556.1-ighv |(2509, 2815)|2.83868966826|(0.956,0.902,1.000)|1
-VQCEVQLVEYG-GGLVQPGGSLRHSC---GFTF----SD--HYMSWVHPAPGKGL---E
WVGFMRNKANGGRT--EYAASVKGRFTISRDDSKSIASLQ------MS-SLNTEDTVLYY
CAR-------
>V138RF-AQIB01153557.1-ighv |(2988, 3297)|3.0|(1.000,1.000,1.000)|1
-VQCEVQLVESG-GGLVQPGGSLRLSCAASGFTF----SD--YWMYWVRQAPGKGL---E
WVSRISG--SSSST--YYPDSVKGRFTISRDNAKNTLYLQ------MD-SLRAEDTAVYY
CAR-------
>V139RF-AQIB01153557.1-ighv |(15135, 15441)|2.99899200002|(0.999,1.000,1.000)|1
-VQCEVQLVESG-GGLVQPGGTLRLSCAASGFTF----GN--SDLIWIRQAPGKGL---E
WVSYISS---GGST--YYSDSVKGRFTISRENAKNTLYLQ------MS-SLRVEDTAVYY
CVR-------
>V140RF-AQIB01153558.1-ighv |(4802, 5117)|3.0|(1.000,1.000,1.000)|1
-VQCEVQLVESG-GGLVQPGGSLRLSCAASGFTF----SN--SWMSWVRQAPGKGL---E
WVARIKSKADGGTA--EYAASVKGRFTISRDDSKNTLYLQ------MN-SLKTEDTAVYY
CTI-------
>V141RF-AQIB01153561.1-ighv |(995, 1304)|2.9441290053|(0.984,0.966,0.996)|1
-VQCEVQPVESG-GGLVQPGGSLRLSCTASGFTF----SS--TRMNWIRQSPGKRL---E
WVADIKY--DGSEK--YYVDSVKGRFTISRDNAKNSLYLQ------MN-SLRAEDTAVYY
CVR-------
>V142RF-AQIB01153564.1-ighv |(5745, 6054)|2.91676545902|(0.998,0.965,0.963)|1
-VSAEVQLVQSG-AEVKRPGESLKISCKTSGYSF----TS--YWISWVRQIPGKGL---E
WIGTIYP--SDSDT--RYSPSFQGQVTISADKSISTAYLQ------WS-SLKASDTATYY
CAK-------
>V143RF-AQIB01153565.1-ighv |(7316, 7625)|2.9654447479|(0.998,0.988,0.981)|1
-VCAEVQLVQSG-AEVKKPGESLKISCKTSGYSF----TS--YWISWVRQIPGKGL---E
WIGAIDP--SDSDT--RYSPSFQGQVTISADKSISTAYLQ------WS-SLKSSDTATYY
CAK-------
>V144RF-AQIB01153566.1-ighv |(30566, 30881)|2.99899200002|(0.999,1.000,1.000)|1
-VQCEVQLVESG-GGLVQPGGTLRLSCAASGFTF----SN--YWMDWVRQAPGKGL---E
WVGFIKNKADGGTA--EYAASVKGRFTISRDDSKNTLYLQ------MN-SLKTEDTAVYY
CTR-------
>V145RF-AQIB01156901.1-igkv |(3348, 3648)|3.0|(1.000,1.000,1.000)|1
-AKCDIQMTQSPSSLSASVGDKVTITCQASQSI------S--SWLAWYQQKPGKAP---K
LLIYK-------AS--SLESGVPSRFSGSG--SGTDFTLT------IS-SLQPEDFATYY
CQQHNSAP--
>V146RF-AQIB01158310.1-igkv |(1186, 1501)|2.99499200002|(0.999,0.998,0.998)|1
-TSGDIVMTQTPLSLPVTPGEPASISCRSSQSLLHS-NGY--TYLNWYLQKPGQSP---L
LLIYL-------VS--NRASGVPDRFSGSG--SGTDFTLK------IS-RVEAEDVGVYY
CMQDIKLP--
>V149RF-AQIB01162311.1-trbv |(11768, 12065)|2.99289600501|(0.999,1.000,0.994)|1
--SLDTAVSQTPKYLVTQMGKKVSLKCEQNLGH---------DTMYWYKQDSKKLL---K
IMFSYN-N--KELT---INETVSTRFSPESPD-KAHLILH------IK-SLELGDSAVYF
CASSQ-----
>V150RF-AQIB01162312.1-trbv |(4219, 4516)|3.0|(1.000,1.000,1.000)|1
--PTDTGVTQTPKHLVMGMTNKKSLKCEQHLGH---------NAMYWYKQKAKKPP---E
LMFVYQ-Y--EKL---SINESVPSRFSPECSK-SSLLYLH------LQ-ALQPEDSALYL
CASSQ-----
>V152RF-AQIB01162312.1-trbv |(18644, 18941)|2.88302193403|(0.992,0.990,0.921)|1
--PLDTAVFQTPKYLVTQMGKKVSLKCEQNLGH---------DTMYWYKQDSKKLL---K
IMFIYS-N--EEPI---LNETVPNRFSPESLG-KAHLNLH------IK-PVELGDSAVYF
CASSQ-----
>V153RF-AQIB01162312.1-trbv |(22989, 23286)|2.99798400013|(1.000,1.000,0.998)|1
--PTDTGVTQTPKHLVMGMTNKKSLKCEQHLGH---------NAMYWYKQKAKKPP---E
LMFVYN-Y--EKL---SINESVPSRFSPECSK-SSLLYLH------LR-ALQPEDSALYL
CASSQ-----
>V154RF-AQIB01162312.1-trbv |(33931, 34221)|2.95483600705|(0.988,0.983,0.984)|1
----EAGVTQTPRSLIKMRGQQVTLSCSPISGH---------RSVSWYQQTPGQGL---Q
LLFEYF-S--ETQR---QKGNFPNRFSGRQFS-NSHSEMN------VS-TLELGDSALYL
CASSL-----
>V155RF-AQIB01162312.1-trbv |(41443, 41740)|2.997|(0.999,0.999,0.999)|1
--PANADVTQSPKFQILKTGQNMTLKCAQDMNH---------NSMYWYRQDPGMGL---R
LIHYSA-T--EDTT---DTGEVPDGYSVSRLN-KKEFLLR------LE-SAAPSQTSVYF
CASSE-----
>V156RF-AQIB01162312.1-trbv |(55583, 55896)|2.99393200206|(0.999,1.000,0.995)|1
--SLDTAVSQTPKYLVTQTGKNESLKCEQNLGH---------NAMYWYKQDSKKLL---K
IMFIYS-N--KEPV---LNETVPNRFSPKSPD-KAHLNLY------IT-SVELGDSAVYF
CASSQDTALQ
>V157RF-AQIB01162312.1-trbv |(59013, 59310)|2.99799600001|(0.999,1.000,0.999)|1
--PMETGVTQTPRHLVMGMTNKKSLKCEQHLGH---------NAMYWYKQKAKKPP---E
LMFIYN-F--KER---AENNSVPSRFSPECPD-SSLLYLH------LR-ALQPEDSALYL
CASSQ-----
>V158RF-AQIB01162312.1-trbv |(70730, 71027)|2.99598400013|(0.998,1.000,0.998)|1
--PVNAGVTQTPKFQILKTGQNMTLKCAQDMNH---------DRMYWYRQDTGMGL---R
LIHYSV-G--EGNT---EKGEVPSGYNASRLN-KKDFLLR------LE-LAAPSQTSIYF
CASSE-----
>V159RF-AQIB01162312.1-trbv |(74325, 74625)|2.92123355494|(0.981,0.960,0.982)|1
--HTDAGVSQSPRNKVTEEGKDVVLRCDPISGH---------IALYWYRQSLGKGL---E
FLIFFQ-G--NDAP--DKSGLPSGRFSAERLE-GSVSTLK------IQ-RTQQGDSAVYL
CASSS-----
>V160RF-AQIB01162313.1-trbv |(10114, 10411)|2.99698000014|(1.000,0.998,0.999)|1
--HTGAGVSQSPSNKVTE-KGNVALRCDPISGH---------AVLYWYRQNLGQGL---E
FLIYFQ-G--TSAV--DDSGLRSDRFSATRPE-GSVSTLK------IQ-RTEQGDSATYF
CASSL-----
>V161RF-AQIB01162313.1-trbv |(15115, 15427)|2.86761052253|(0.974,0.935,0.965)|1
--PVDTGVTQSPTHLIKTRGQQVTLRCSPISGH---------TSVSWYQQAPGQGP---Q
FIFKYA-N--ELRT---SEGNFPHRFSGRQFR-DYHSEMN------VS-ALELGDSALYL
CASSLAQPGR
>V162RF-AQIB01162313.1-trbv |(17798, 18094)|2.99080001921|(0.999,1.000,0.992)|1
--SVDSGVTQTPKHLITAIGQQVTLRCSPRSGD---------LSVYWYQQSLGQGL---Q
FLIQYY-N--GAER---AKGNILERFSAQQFP-DLHSELN------LS-SLELGDSALYF
CASSL-----
>V163RF-AQIB01162314.1-trbv |(7361, 7658)|2.44948306169|(0.967,0.728,0.959)|1
--HRDAEITQSPRHKITETGRQVTLKCHQTWNH---------NNMFWYRQDLGHGL---R
LIHYSY-G--VPDT---NKGEVPDGYSVSRSN-EEDFPLT------LE-SAASSQTSVYF
CASSE-----
>V166RF-AQIB01162317.1-trbv |(23070, 23367)|2.99696400065|(1.000,1.000,0.997)|1
--PVNAGVTQTPKFQVLKTGQSMTLQCAQDMNH---------DCMYWYRQDPGMGL---R
LIHYSF-G--KGST---DKGEVPDGYNVTRSS-TEDFTLR------LE-SAAPSQTSVYF
CASSY-----
>V168RF-AQIB01162317.1-trbv |(35256, 35552)|2.99498000014|(0.998,1.000,0.997)|1
--PVQAGVTQSPTHLIKTRGQQVTLRCSPISGH---------SSVYWYQQALGQGL---Q
FILSYD-E--EEER---DRGTFPHRFSGHQFP-NYSSELN------VN-ASEVGDSALYL
CASSL-----
>V169RF-AQIB01162317.1-trbv |(46598, 46898)|2.99280401921|(1.000,0.993,1.000)|1
--HTGAGVSQSPSYKVTKRGQDVALRCDPISGH---------VALYWYRRTLGQGP---E
LLTYFQ-N--DAQP--DKSGLPSDRFSAERPE-GSVSTLK------IQ-RTQQGDSAVYL
CASSL-----
>V170RF-AQIB01162318.1-trbv |(2955, 3251)|2.99899600001|(1.000,1.000,0.999)|1
----NAGVTQTPKFQVLKTGQSMTVQCAQDMNH---------DYMFWYRQDPGMGL---R
LIHYSG-A--AGTT---DKGEVPSGYNVSRLN-TEDFPLR------LE-SAAPSQTSVYF
CASSYST---
>V171RF-AQIB01162319.1-trbv |(8580, 8876)|2.96730491943|(0.999,0.989,0.981)|1
--PVDAGVTQSPTHLIKMRGQQVTLRCSPISGH---------NTVSWYQQALGQGP---Q
FIFQYY-E--KEER---EKGNFPGRFSGHQFP-NYSSELN------VN-ASEMGDSALYL
CASSL-----
>V173RF-AQIB01162319.1-trbv |(25283, 25579)|2.97870083945|(0.999,1.000,0.981)|1
--PVDAGVTQSPTHLIKTRGQQVTLRCSPISGH---------TSVSWYQQALGQGP---Q
LIFQYY-E--KEER---EKGNFPGRFSGHQFP-NYSSELN------VN-ASEMGDSALYL
CASSL-----
>V174RF-AQIB01162319.1-trbv |(33229, 33529)|2.78497797762|(0.993,0.878,0.968)|1
--HTGAGVSQSPRYRVTKRGQEVAFRCDPISGH---------EYLYWYQQAPGQGP---E
FLTYFQ-N--DAQL--DKSGLPSGRFSAERPE-GSVSTLK------IQ-RTQQGDSAMYL
CASSL-----
>V177RF-AQIB01162320.1-trbv |(3376, 3672)|2.99696400065|(1.000,1.000,0.997)|1
--PVDTGVTQSPTHLIKMRGQQVTLRCSPISGH---------SSVYWYQQALGQGP---Q
FIFQYY-E--KEER---GRGNFPDRFSGHQFP-NYSSELN------VS-ALLLGDSALYL
CASSL-----
>V178RF-AQIB01162320.1-trbv |(10674, 10965)|2.99280401921|(1.000,1.000,0.993)|1
----NAGVTQTPKFQVLKTGQSMIVQCAQNMNH---------DYMFWYRQDPGMGL---R
LIYYSV-T--AGIT---TKGEVPNGYNVSRRN-TEDFLLR------LE-SAALSQTSVYF
CASSY-----
>V179RF-AQIB01162320.1-trbv |(14920, 15220)|2.99696400065|(1.000,1.000,0.997)|1
--HTGAGVSQSPRYKVIKKGQDVALRCDPISGH---------AALYWYQQALGQGP---E
FLTYFN-Y--KDQP--DKSGLPNNRFSAERPE-GSFSTLT------IQ-RTEQQDSAVYL
CASSL-----
>V180RF-AQIB01162320.1-trbv |(23602, 23892)|2.84354797504|(0.995,0.909,0.971)|1
----DAGVTQSPMHLIKTRGQQVTLRCFPISGH---------NTVSWYQQTLGQGP---Q
LIFQYY-R--EEER---GKGNFPDRFSGRQFP-NYSSELN------VS-ALLLGDSALYL
CASSL-----
>V181RF-AQIB01162320.1-trbv |(46876, 47173)|2.99899600001|(1.000,0.999,1.000)|1
--HMDARITQSPRHKITETGTPVTLRCHQTENH---------RYMYWYRQDLGHGL---R
LIHYSY-G--VEDT---DKVEVSDGYSVSRSK-TEDFLLT------LE-SATRSQTSVYL
CASSE-----
>V183RF-AQIB01162320.1-trbv |(63466, 63766)|2.97058870068|(0.999,0.982,0.991)|1
--HTDAGVIQSPRHEVTEMGKEVTLRCEPISGH---------NSLFWYRQTMMRGL---E
FLIYFN-N--KSPI--DDSGMPKDRFSAKMPN-ASFSTLK------IQ-PSEPRDSAVYF
CASSL-----
>V184RF-AQIB01162320.1-trbv |(66748, 67048)|2.92080401921|(0.976,0.976,0.969)|1
--HTDAGVIQSPRHEVIEMGKEVTLRCEPISGH---------TYLFWYRQTMMRGL---E
FLIYFN-N--KSPI--DDSGMPKDRFSAEMPE-ASFSILK------IQ-PSEPRDSAVYF
CASSL-----
>V185RF-AQIB01162320.1-trbv |(82427, 82727)|2.90925050302|(0.985,0.997,0.937)|1
--LIDAGVTQTPRHKVTEMGQEVTMRCQPILGH---------NTIFWYRQTMMRGL---E
FLIYFN-N--KSPI--DDSGMPKDRFSAEMPN-ASLATLK------IQ-PSEPRDSAVYL
CASGL-----
>V188RF-AQIB01162320.1-trbv |(99411, 99711)|2.86123836336|(0.986,0.964,0.927)|1
--SPGEEVTQTPKHLVKGEGQKAKLYCAPITGH---------SYVFWYQQVLRKEF---K
FLISFQ-N--KNVF--DETGMPKERFSAKCPP-NSPCSLE------IQ-ATKLKDSAVYF
CASSQ-----
>V189RF-AQIB01162321.1-trbv |(2362, 2659)|2.994900005|(1.000,1.000,0.995)|1
--TVDGGITQSPKYLFRKEGQNVTLSCEQNLNH---------DAMYWYRQDPGQGL---R
LIYYSQ-T--VNDI---QKGDTAEGYSVSRER-KQSFPLT------VT-SAQRNPTAFYL
CASSI-----
>V190RF-AQIB01162321.1-trbv |(20388, 20688)|2.99899600001|(1.000,0.999,1.000)|1
--STDTKVTQRPRLLVKANEQKAKMDCVPVKGH---------SYVYWYRKKLDEEL---K
FLIYFQ-N--EEII--QKAEIINERFSAQCPQ-NSPCTLE------IQ-STESGDAALYF
CASSK-----
>V191RF-AQIB01162321.1-trbv |(29352, 29657)|2.99596000066|(1.000,0.999,0.997)|1
--SFHAEVTQTPGYLVKGKGQKTKMDCTPEKGH---------TFVYWYQQNQNKEF---T
FLISFQ-N--EQVL--QETELHKKRFSSQCPK-NPPCSLE------IP-SSEPGDTALYL
CASSQST---
>V192RF-AQIB01162321.1-trbv |(41537, 41835)|2.85371268352|(0.993,0.988,0.904)|1
--SMDADVTQTPRNKIAKTGKRIMLECSQTKSH---------DRMYWYRQDPGLGL---R
LIYYSF-D--VKDI---NKGEISDGYNVSRQE-QAKFSLS------LE-SATPNQTALYF
CATSD-----
>V193RF-AQIB01162321.1-trbv |(50021, 50318)|2.99593600205|(1.000,0.996,1.000)|1
--LMEADIYQNPRHCVIGTGKKITLECSQTMGH---------DKMYWYQQDPGMEL---H
LIHYSY-G--VNST---ERGDFSSESTVSRIR-IEHFPLT------LE-SASPSHTSQYL
CASSE-----
>V194RF-AQIB01162321.1-trbv |(81250, 81547)|2.99194800078|(0.997,1.000,0.995)|1
--PLEAQVTQNPRYLITVTGKKLTVTCSQNMNH---------EYMSWYRQDPGLGL---R
QIYYSI-N--VEMV---DKGDIPEGYIVSRKE-KRNFLLI------LE-SPSPSQTSLYF
CASSL-----
>V195RF-AQIB01162321.1-trbv |(86583, 86890)|2.98032417086|(0.988,1.000,0.993)|1
--LVDVKVTQSSRYLIKRTGEKVFLECVQDMDH---------ERMFWYRQDPGLGL---R
LIYFSY-D--VKLN---EKGDIPEGYNVSREK-KERFSLI------LG-FASTNQTSMYL
CASSLSTA--
>V196RF-AQIB01162321.1-trbv |(106451, 106754)|3.0|(1.000,1.000,1.000)|1
-SVFSAVVSQKPSRDVCQRGTSVTIQCQVDSQV---------TMMFWYRQQPGQSM---T
LIATANQG--SEAT--YESGFVIDKFPISRPN-LTFSTLT------VS-NTSPEDSSIYL
CSVE------
>V197RF-AQIB01086294.1-ighv |(20916, 21222)|2.89594695549|(0.950,0.997,0.958)|-1
-VRCEVQRVESG-GGLVQPGGSLRLSCAASGFTI----SS--SWMNWDFQAPGKGL---E
CVSHISS--VG-ST--DYPDSIKGQFTISRDNTKNTLYVQ------MN-SLRAEDMAVYY
CAR-------
>V198RF-AQIB01128636.1-trav |(12150, 12438)|2.98989600501|(0.998,0.993,0.999)|-1
-LSGELKVGQNPLFLSTQEGKNDTIYCNYSTA-------S--DRLYWYRQDPGKSL---E
SLFVLL-S--NGA------VKQEGRFMASLDTKARLSTLH------IT-AALQDLSATYF
CAV-------
>V200RF-AQIB01128637.1-trdv |(70372, 70673)|2.88929815127|(0.996,0.993,0.922)|-1
-SGMAQTVTQSQPEMSVREAETVTLSCTYDTSE-----SD--YYLFWYQQPPSRQM---T
LIIRQE-A--YKQ-----QNATENRFSVNFQKAAKSFSLK------IS-DSQLGDAAMYF
CAFM------
>V201RF-AQIB01128637.1-trav |(79553, 79853)|2.99078801933|(1.000,0.998,0.993)|-1
-SGMAQTVTQSQPEMSVREAETVTLSCTYDTSE-----SY--YYLFWYKQPPSRQM---T
LIIRQE-A--YKQ-----QNATENRFSVNFQKAAKSFSLK------IS-DSQLGDAARYF
CAYR------
>V202RF-AQIB01128641.1-trav |(41129, 41429)|2.31436670652|(0.892,0.721,0.828)|-1
-SSVAQKVTQAQSSVSMTVGKAVTLNCQYETSWW----S---YYLFWYKQLPSKEM---I
FLIRQG-S--SEQ-----NA-RNGRYSVNFEKAASSIALT------IS-ALQLEDSATYF
CALWE-----
>V204RF-AQIB01128641.1-trav |(68354, 68644)|2.49204681934|(0.928,0.748,0.938)|-1
--TIIDAKTTQPTSMDCAEGRAANLPCNHSTIS-----AN--EYIHWYRQIHSQGP---Q
YVIHGL-K--NKETNAMAS------L--IITEDRKSSTLI------LP-HATLRDTAVYY
CIVRV-----
>V206RF-AQIB01128642.1-trav |(7440, 7727)|3.0|(1.000,1.000,1.000)|-1
-LSGEDQVTQSPEALSLQEGESSSLNCSYTVSG------L--RGLFWYRQDPGKGP---E
FLFSLY-S--AGE------EKEKERLKATLTKK--ESFLH------IT-GPKPEDSATYL
CAVQ------
>V207RF-AQIB01128642.1-trav |(19364, 19663)|2.84514288646|(0.968,0.906,0.988)|-1
-VSGKQEVTQIPAALSVPEGDNLVLNCSFTDSA------I--YNLQWFRQDPGKGL---T
SLLLIQ-S--SQR------EQTSGRLNASLDKSSGRSTLY------IT-ASQPTDSATYL
CAVRHS----
>V208RF-AQIB01128643.1-trav |(8686, 8977)|2.99696400065|(1.000,0.997,1.000)|-1
-RTNGDSVTQTEGPVTLPERAALTLNCTYQTSY-----S---AFIFWYVQYPKKEP---E
LLLKSS----ENQ------ETNSRGFQASHVKSDSSFHLE------KP-SVQLSDSAVYY
CVLR------
>V209RF-AQIB01128643.1-trav |(11902, 12205)|2.99696400065|(1.000,1.000,0.997)|-1
-SSMAQKVTQAQTEISVVEKEDVTLDCVYETRE-----TT--YYLFWYKQPPSGEL---V
FLIRQN-S--FNE-----QNEINGRYSSNFQKSTSSFNLT------IT-ASQVMDSAVYF
CALNE-----
>V211RF-AQIB01128644.1-trav |(158071, 158361)|2.997|(0.999,0.999,0.999)|-1
-MSRGDDVEQS-LFLSVREGDISVINCTYTDSS------S--TYLYWYKQEPGAGL---Q
LLIYIL-S--NTD------LKQDQRLTVLLNKKDKHLSLR------IA-DTQTGDSAIYF
CAES------
>V213RF-AQIB01128644.1-trav |(203408, 203702)|3.0|(1.000,1.000,1.000)|-1
-GINGDSVVQTEGQVLLSEGNSLIVNCSYESTQ-----Y---PSLFWYVQYPGEGP---Q
LLLKAM-K--DND------KESNKGFEATYRKETTSFHLE------KD-SVQESDSAVYF
CALS------
>V214RF-AQIB01128644.1-trav |(216592, 216885)|2.99286400565|(0.995,0.998,1.000)|-1
-GSGKNQVEQSPQSLIILEGKNCTLQCNYTVSP------F--SNLRWYKQDTGKGL---I
SLTIMT-F--SDN------TKSNGRYTATLDADTKQSSLY------IT-AAQLSDSASYI
CVVS------
>V215RF-AQIB01128644.1-trav |(232171, 232464)|2.99798400013|(1.000,0.998,1.000)|-1
VWGQQKEVEQNPGPLSVPEGATASLNCTYSNSA------F--QYFMWYRQYSRKGP---Q
LLIYIY-S--SGN------K-EDGRFTAQVDKSSKYISLF------IR-DSQPSDSATYF
CAMS------
>V216RF-AQIB01128644.1-trav |(237634, 237931)|2.82568944415|(0.990,0.985,0.890)|-1
-GTRAQSVTQLDSQVSVSEGVPVLLRCNYSSSF-----P---PNLFWYVQYPNQGL---Q
LLLKYI-S--GTA-----LVKGINGFKAEFKKSETSFHLT------KA-SAHVSDAAEYF
CAVS------
>V217RF-AQIB01128644.1-trav |(243150, 243447)|3.0|(1.000,1.000,1.000)|-1
-TARAQSVTQPDIHITVSEGASLELRCNYSYGA-----T---PSLFWYVQSPGQGL---Q
LLLKYF-S--GDT-----LVQGIKGFEAEFKRSQYSFNLR------KP-SVHWSDAAEYF
CAAG------
>V218RF-AQIB01128644.1-trav |(257060, 257353)|3.0|(1.000,1.000,1.000)|-1
-VSRGESVGLHLPTVSVQEGDNSVINCTYSDSA------S--DYFLWYKQESGKGP---Q
SIIDIR-S--NMA------KRQGQRLTVLLNKTMKHLSLQ------IA-ATEPGDSAVYF
CAEN------
>V219RF-AQIB01128644.1-trav |(262905, 263206)|2.96640647223|(1.000,1.000,0.970)|-1
-SGIAQKITQTQPAMFVQEKEAVTLDCTYDTSD-----QS--YGLFWYKQPSSGEM---I
FLIRQE-S--YDK-----QNATEGRYSLNFQKARKSVNLV------IS-ASQVEDSAMYF
CAMR------
>V220RF-AQIB01128644.1-trav |(280831, 281125)|2.99798400013|(1.000,1.000,0.998)|-1
-RTRGDSVTQMEGPVTLSERAFLTINCTYTATG-----Y---PSLFWYVQYPGEGP---Q
LLLKAV-K--TDE------KGSNKGFEATYRKETTSFHLK------KD-SVQESDSAVYF
CALS------
>V221RF-AQIB01128644.1-trav |(305369, 305662)|3.0|(1.000,1.000,1.000)|-1
VWSQQKEVEQNPGPLSVPEGATASLNCTYSNSA------F--QYFMWYRQYSRKGP---Q
LLIYIY-S--SGN------K-EDGRFTAQVDKSSKYISLF------IR-DSQPSDSATYF
CAMS------
>V222RF-AQIB01128644.1-trav |(340098, 340385)|2.99598400013|(0.998,1.000,0.998)|-1
--VNSQQGEEDPQTLSIQEGENATMNCSYKTS-------I--NNLQWYRQDSGRSL---V
QLTLIR-S--NER------QKNSGRLRVTLDTSKKSSSLL------IT-ASRAADTASYF
CATD------
>V223RF-AQIB01144282.1-igkv |(6898, 7198)|2.90814200892|(0.995,0.930,1.000)|-1
-AKCDIQLTQSPTFLSASVGDRATIACRASQSI------N--KGLAWYQQKPGKVP---K
LLISY-------AS--DLYTGVPSRFSGSG--SGTDFTLT------IS-SLQPEDAATYY
CFQYNSYP--
>V224RF-AQIB01144282.1-igkv |(55648, 55948)|3.0|(1.000,1.000,1.000)|-1
-TTGQVILTQSPATLSLSPGERATLSCRASQSVS--------SYLAWYQQKPGQAP---R
LLIYS-------AS--SRATGIPDRFSGSG--SGTEFTLT------IS-SLEPEDVGVYH
CYQYYSGY--
>V226RF-AQIB01144284.1-igkv |(30267, 30585)|2.9918400105|(1.000,0.994,0.998)|-1
-AYGDIVMTQSPDSLAVSLGERVTINCKSSQSLLYSSNNK--NYLAWYQQKPGQAP---T
LLISW-------AS--TRESGVPNRFSGSG--SGTDFTLT------IS-GLQAEDVAVYY
CQQHYSSP--
>V227RF-AQIB01145361.1-ighv |(1895, 2208)|2.99899600001|(1.000,1.000,0.999)|-1
-VQCEVQLVESG-GGLVQPGRFLRLSCAASGFTF----SN--CYMHWAHQAQGRGL---E
WVSLMRKKANSYAT--EYAVSVKDRFTISRDDSKNTLYLQ------MN-SLKTEDTAVYY
CA--------
>V228RF-AQIB01145362.1-ighv |(14904, 15217)|2.99899600001|(1.000,1.000,0.999)|-1
-VQCEVQLVESG-GGLVQPGRFLRLSCAASGFTF----SN--CYMHWAHQAQGRGL---E
WVSLMRKKANSYAT--EYAVSVKDRFTISRDDSKNTLYLQ------MN-SLKTEDTAVYY
CA--------
>V229RF-AQIB01146043.1-iglv |(9768, 10077)|2.87146301927|(0.989,0.994,0.912)|-1
-VDSETVVTQEP-SLSVSSGGTVTITCGLSSGSV---STS--NYPSWYQQTPGQAP---R
TLIYS-------TN--TRPSGVPDGFSGSI--LGNKAALT------IM-GAQADDESDYY
CTLYMGSGI-
>V230RF-AQIB01153518.1-ighv |(54, 366)|2.99480001|(0.995,1.000,1.000)|-1
-VLSQVQLQESG-PGLLKPSETLSLTCAVSGGSI----SD-SYRWSWIRQPPGKGL---E
WIGNIYGN--SAST--NYNPSLKSRVTISKDTSKNQFSLK------LS-SVTAADTAVYY
CAR-------
>V231RF-AQIB01158235.1-ighv |(4748, 5060)|2.99799600001|(0.999,0.999,1.000)|-1
-VQCEVQLVESG-GGLVQPGGSLRLSCVASGFTF----SD--HYMHWVRQALGKGL---E
WVSRISSG-SGSST--YYADSVKGRFTISRDNAKNTLYLQ------MN-SLRAEDTAVYY
CAR-------
>V232RF-AQIB01159121.1-igkv |(3373, 3688)|2.98366002957|(0.999,0.993,0.992)|-1
-SSGDVVMTQSPLSLPVTPGQPASISCRSSQSLVHS-DGN--TYLSWFQQKPGQPP---R
LLIYQ-------VS--NRDSGVPDRFSGSG--AGTDFTLK------IS-RVEAEDVGVYY
CVQGTKVP--
>V0RF-AHZZ01030316.1-trgv |(43861, 44177)|2.98451211712|(0.999,0.988,0.998)|1
-SQKSSNLEGRTKSVTRPTGSSAEITCDLPEV------SS--FYIHWYLHQEGKAP---Q
RLLYYD-S--SNSRVVLESGISPGKYDTYGSTRRRNLRLI------LR-NLIENDSGVYY
CANWD-----
>V1RF-AHZZ01035404.1-trdv |(2190, 2491)|2.86843549911|(0.992,0.975,0.922)|1
-SGMAQTVTQSQPEMSVREAETMTLSCTYDTSE-----SN--YYLFWYKQPPSRQM---I
LIIRQE-A--YKQ-----QNATENRFSVNFQKAAKSFSLK------IS-DSQLGDAAMYF
CAFM------
>V2RF-AHZZ01035404.1-trav |(11684, 11986)|3.0|(1.000,1.000,1.000)|1
-SGMAQTVTQSQPEMSVQEAETVTLSCTYDTSD-----SD--YYLFWYKQPPSRQM---I
LIIRQE-A--YKQ-----QNATENRFSVNFQKAAKSFSLK------IS-DSQLGDAAMYF
CAYRS-----
>V3RF-AHZZ01035404.1-trav |(35215, 35503)|2.99696400065|(1.000,0.997,1.000)|1
-LSGELKVGQNPLFLSTQEGKNYTIYCNYSTA-------S--NRLYWYRQDPGKSL---E
SLFVLL-S--NGA------VKQEGRLMASLDTKARLSSLH------IT-AALQDLSATYF
CAV-------
>V4RF-AHZZ01040804.1-igkv |(26742, 27054)|2.87344961302|(0.997,0.993,0.912)|1
-CNGDIVLTQSPASLAVSPGQRATITCRASESVSLLG--I--NFIHWYQQKPGQPP---K
LLIYQ-------AS--NKDTGVPARFSGSG--SGTDFTLT------IN-PVEADDAANYY
CLQSKDLP--
>V5RF-AHZZ01040804.1-igkv |(44403, 44694)|2.99899600001|(1.000,0.999,1.000)|1
-----IVLTQSPTSMAVSQGERVTISCTASSSVS-----T--SYLHWYQQKPGFPP---R
LLVYR-------TS--SLASGVPARFSGSG--SGTSYTLT------IS-SMEAEDAANYY
CQQGNSIP--
>V6RF-AHZZ01042100.1-igkv |(22346, 22662)|2.8860082676|(0.988,0.921,0.995)|1
-TSGDILLTQTPLSLPVTPAEPASISCRSSQSLLHS-NGN--TYLHWYLQKPGQSP---Q
LLIYE-------VS--NRASGVPERFSGSG--SGTDFTLK------IS-LVEAEDVGVYY
CMQTTQWP--
>V7RF-AHZZ01042101.1-igkv |(1294, 1609)|2.96323565456|(0.996,1.000,0.970)|1
-SSGDIVMTQTPLSLPVTLGEPTSISCRSSQSLVYS-DGK--TYLHWYLQKPGQSL---Q
LLMYL-------VS--KRASGVPDRFSGSG--SGTDFTLK------IS-RVEAEDVGVYY
CMQTLRSP--
>V8RF-AHZZ01042101.1-igkv |(23302, 23620)|2.88199738585|(0.998,0.917,0.993)|1
-SSGDIVMTQTPLFLPVTLGEPASISCRSSQSLLDSEDGN--TYLDWYLQKPGQSP---Q
LLIYE-------VS--NRASGVPDRFSGSG--SDTDFTLK------IS-RVEAEDVGVYY
CMQALEFP--
>V9RF-AHZZ01064615.1-ighv |(3396, 3696)|2.99899600001|(1.000,0.999,1.000)|1
-VQCEVQLVESG-GGLVQPGGSLRLSCAASGFTF----SS--YAMQWVHQTPGKGL---E
WVSAIGP--GG-DT--YYADAVKGRFTISRDNAKNSLYLQ------MN-S--LRAEAVYY
CAR-------
>V10RF-AHZZ01064617.1-ighv |(710, 1019)|2.95106587284|(0.977,0.977,0.999)|1
-AHSQEQLVQSG-AEVKKPGASVKVSCKASEYTF----TS--YVISWLRQAPGQGF---E
WMGGINP--SDGST--SYAQKFQDRVTITADMSTSTVYME------LS-SLRSEDTAVYY
CAR-------
>V11RF-AHZZ01064625.1-ighv |(10295, 10604)|2.98666005261|(0.998,0.989,1.000)|1
-VLSQVQLQESG-PAVVKPSQTLSLTCAVSGGSI----SS-GYDWSWIRQSPGKAL---E
WIGYISYS---GST--NYNPSLKSRVTISRDTSKNQFSLK------LS-SVTAADTAVYY
CAR-------
>V12RF-AHZZ01064628.1-ighv |(242, 554)|2.93792258934|(0.987,0.957,0.998)|1
-VLSQVKLQQWG-EGLVKLSETLSLTCAVYGGSI----S-GYYYWSWIRQAPGKGL---E
WIGSIYSS--GSST--YYNPSLKSRVTISTDTSKNQFSLK------LS-SVTAADSAVYY
CAR-------
>V13RF-AHZZ01064636.1-ighv |(1268, 1580)|2.93041612211|(0.975,0.986,0.970)|1
-VLSQVKLQQWG-EGLVKPSETLSLTCAVYGGSI----S-GYYYWSWIRQPPGKGL---E
WIGNIDGN--SAST--NYNPSLKNRVTISKDTSKNQFSLK------LS-SVTAADSAVYY
CAR-------
>V14RF-AHZZ01069449.1-ighv |(25634, 25949)|3.0|(1.000,1.000,1.000)|1
-VQCEVQLVESG-GGLVQPGGSLRLSCAASGFTF----SN--YWMNWVRQAPGKGL---E
WVGFIKNKADGGTA--AYAESVKGRFTISRDDSKNTLYLQ------MN-SLKTEDTAVYY
CTR-------
>V15RF-AHZZ01069451.1-ighv |(7153, 7468)|3.0|(1.000,1.000,1.000)|1
-VQCEVQLVESG-GGLVQPGRSLRLSCAASGFTF----SN--YYMHWVRQAQGKGL---E
WVGLIRNKANSYTT--EYAAAVKGRFTISRDDSKNTLYLQ------MS-SLKTEDTAVYY
CTT-------
>V16RF-AHZZ01069453.1-ighv |(22421, 22735)|2.90974548772|(0.997,0.933,0.996)|1
-VFSQVTLKESG-PALVKPTQTLTLTCTFSGFSL----STSGMRVSWIRQPPGKAL---E
WLARIDW---DDDK--YYSTSLKSRLTISKDTSKNQVVLT------MT-NMDPVDTATYY
CARR------
>V17RF-AHZZ01069455.1-ighv |(6977, 7286)|2.99294800078|(0.996,0.998,0.999)|1
-VQCEVQLVESG-GGLVQPGGSLRLSCAASGFTF----SS--YYMYWIRQAPGKGL---Q
WVSAINT--GGGST--WYTDSVKGRFTISRENAKNTLYLQ------MN-SLRAEDTAVYY
CAK-------
>V18RF-AHZZ01069455.1-ighv |(20090, 20405)|2.88130902447|(0.994,0.915,0.997)|1
-VQCEMQLVESG-GGLAQPGGSLRLSCAASGFTF----SD--HYMHWVRQAPGKGP---E
WVGFIRNKAKGGTA--EYAASVKGRFTISRDDSKNVTYLQ------MN-SLKTEDTAVYY
CAR-------
>V19RF-AHZZ01069455.1-ighv |(33477, 33791)|2.87690290057|(0.996,0.929,0.972)|1
-VLSQVTLKESG-PALVKPTQTLTLTCTFSGFSL----STSGMCVSWIRQPPGKAL---E
WLARIDW---DNDK--YYSTSLKSRLTISKDTSKNQVVLT------MT-NMDPVDTATYY
CARV------
>V20RF-AHZZ01069455.1-ighv |(52071, 52380)|2.43482657607|(0.996,1.000,0.713)|1
-VLSQVQLQESG-PGLVKPSETLSLTCAVSGGSI----S--SYWWGWIRQPPGKGL---E
WIGHIYGS--SGSN--YLNPSLKSRVTISIDTSKNQLSLK------LS-SVTAADTAVYY
CAR-------
>V21RF-AHZZ01069456.1-ighv |(9988, 10297)|3.0|(1.000,1.000,1.000)|1
-VQCEVQLVESG-GGLVQPGGSLRLSCAASGFTF----SS--YGMHWARQAPGKGL---E
WVSAINT--GGGST--WYADSVKGRFTISRENAKNTLYLQ------MN-SLRAEDTAVYY
CAK-------
>V22RF-AHZZ01091598.1-ighv |(21923, 22232)|2.95754165691|(0.995,0.966,1.000)|1
-AHAQVQLVQSG-AQIKQPGASVKLSCKASGYTF----TS--YYMHWVRQAPGQGL---E
WIGLISP--YNGNK--GYAQNFQGRVTITTDTSTSTGYME------LS-SLRSEDTAVYY
CTR-------
>V23RF-AHZZ01091599.1-ighv |(2219, 2528)|3.0|(1.000,1.000,1.000)|1
-VQCEVQLVESG-GGLSKPGGSLRLSCAASGFTF----SD--YNMDWVRQASGKGL---E
WVSSINTG--GGST--WYADSVKGRFTISRENAKNTLYLQ------MN-SLRAEDTAVYY
CAR-------
>V24RF-AHZZ01091599.1-ighv |(13841, 14150)|2.93543530231|(0.993,1.000,0.950)|1
-VQCEVQLVESG-GGLVQPGGSLRLSCAASGFTF----SD--NYMEWVRQAPGKGL---Q
WVGQINP--NGGTT--FLMDSVKGRFTISRDNAKNTLYLQ------TS-SLNTEDTAVYY
CTR-------
>V25RF-AHZZ01091600.1-ighv |(4723, 5037)|2.27752052158|(0.976,0.923,0.682)|1
-VLSQVTLKESG-PALVKPTQTLTLTCTFSGFSL----TTSGMGVGWIRQPPGKAL---E
WLAHIYW---DDDK--RYSPSLKSRLTISKDTSKNQVVLT------MT-NMDPVDTATYY
CARR------
>V26RF-AHZZ01091603.1-ighv |(4407, 4716)|2.99698000014|(0.998,0.999,1.000)|1
-VLSQVQLQESG-PGLVKPSETLSLTCAVSGGSI----S--SNYWNWIRQPPGKGL---E
WIGRIYGG-S-GST--DYSPSLKSRVTISTDTSKNQLSLK------LS-SVTAADTAMYY
CAR-------
>V27RF-AHZZ01097944.1-iglv |(5376, 5682)|3.0|(1.000,1.000,1.000)|1
--DSETVVTQEP-SLSVSSGGTVTLTCGLSSGSV---STS--NYPSWYQQTPGQAP---R
TLIYR-------TN--TRPSGVPDRFSGSI--LGNKAALT------IT-GAQADDESDYY
CMLYMGSGI-
>V29RF-AHZZ01097949.1-iglv |(59447, 59759)|3.0|(1.000,1.000,1.000)|1
-SWAEVVFTQPH-SVSGSPGQTVTISCTRSSGSI---D-S--KYVQWYQQRPGSAP---T
TVIYE-------DN--KRPSGVPDRFSGSIDSSSNSASLT------IS-GLNSEDEADYY
CQSADGSYN-
>V30RF-AHZZ01098200.1-trav |(876, 1169)|2.99798400013|(1.000,1.000,0.998)|1
VWSQQKEVEQNPGPLSVPEGATASLNCTYSNSA------F--QNFMWYRQYSRKGP---Q
LLIYTY-S--SGN------K-EEGRFTAQVDKSSKYISLF------IR-DSQPSDSATYF
CAMS------
>V31RF-AHZZ01098200.1-trav |(35496, 35783)|2.99798400013|(1.000,1.000,0.998)|1
--VNSQQGEEDPQTLSIQEGENATMNCSYKTS-------I--NNLQWYRQDSGRSL---V
QLILIC-S--NER------EKNSGRLRVTLDTSKKSSSLL------IT-ASRAADTASYF
CATD------
>V32RF-AHZZ01098200.1-trav |(47312, 47603)|2.97480001921|(0.989,0.990,0.996)|1
-RTNGDLVTQTEGPVTLPERAALTLNCTYQTSY-----S---AFIFWYVQYPNKEP---E
LLLKSS----ENQ------ETNSRGFQASHDKSDSSFHLE------KP-SVQLSDSAVYY
CVLR------
>V33RF-AHZZ01098200.1-trav |(50539, 50842)|2.99188400513|(0.995,1.000,0.997)|1
-SSMAQKVTQAQTEISVVEKEDVTLDCVYETRE-----NT--YYLFWYKQPPSGEL---V
FLIRRN-S--FDE-----QNEMNGRYDSNFQKSTSSFNLT------IT-ASQVVDSAVYF
CALNE-----
>V34RF-AHZZ01098200.1-trav |(85982, 86269)|2.97149304411|(0.996,0.977,1.000)|1
-LSGEDQVMQSPEALSLQEGESSSLNCSYTVSG------L--RGLFWYRQDPGKGP---E
FLFSLY-S--AGE------EKEKERLKATLTKK--ESFLH------IT-GPKPEDSATYL
CAVQ------
>V35RF-AHZZ01098942.1-ighv |(3874, 4183)|2.99899600001|(1.000,1.000,0.999)|1
-VLSQVQLQESG-PGLVKPSETLSLTCAVSGGSF----SS--NYWSWICQPPGKGL---E
WIGGIYGS--GGST--YYNPSLKNRVTISTDTSKNQFSLK------LS-SVTAADTAVYY
CAR-------
>V36RF-AHZZ01098950.1-ighv |(183, 495)|3.0|(1.000,1.000,1.000)|1
-VLSQVQLQESG-PGLVKPSETLSLTCAVSGYSI----SSG-YYWGWIRQPPGKGL---E
WIGYIYGN--SAST--YYNPSLKSRVTISKDTSKNQFSLK------LS-SVTAADTAVYY
CAR-------
>V37RF-AHZZ01099970.1-iglv |(6343, 6653)|3.0|(1.000,1.000,1.000)|1
-SWAEVVFTQPH-SVSGSPGQTVTISCTRSSGSI---D-S--KYVQWYQQRPGSAP---T
TVIYN-------DD--QRPSGVPDRFSGSIDSSSNSASLT------IS-GLKSEDEADYY
CQSADSSS--
>V38RF-AHZZ01099973.1-iglv |(38400, 38710)|2.99899600001|(1.000,0.999,1.000)|1
-SWAQSVLTQPP-SVSGAPGQRVTISCTGSSSNI---GAG--YYVSWYQQLPGTAP---K
LLIYE-------NN--KRPSGVSDRFSGSK--SGTSASLA------IT-GLQAEDEADYY
CQSYDSSLS-
>V39RF-AHZZ01100290.1-ighv |(204, 517)|2.9918720041|(1.000,0.996,0.996)|1
-VQCEVQLVESG-GGLVQPGRFLRLSCAASGFTF----SN--YYMHWAHQAQGRGL---E
WVSLMRKKANSYTT--EYAVSVKDRFTISRDDSKNTLYLQ------MN-SLKTEDTAVYY
CA--------
>V40RF-AHZZ01104241.1-igkv |(8110, 8412)|2.96516337871|(1.000,1.000,0.969)|1
-STGDVVMTQSPLSLPVTPGEPASISCRSSQSLLHS-SGN--TYLSWFQQKPGQSA---R
RLIYK-------VS--NRDSGVPDRFTGSG--AGTDFTLK------IS-RVEAEDVGVYY
CMEG------
>V41RF-AHZZ01104241.1-igkv |(24888, 25186)|2.76732331769|(0.997,0.852,0.999)|1
-SKGEIVLTQSPAFRSVTLKEKVTITCQASQSIG--------SSLHWYQQKPDRSP---K
LLIKY-------AS--QSISGVPSRFSGSG--SGTDFTLT------IN-SLEAEDAATYY
CQQSSSL---
>V42RF-AHZZ01104241.1-igkv |(53164, 53464)|3.0|(1.000,1.000,1.000)|1
-TSGEIVLTQSPATLSLSPGERATLSCRASQSVG--------SSLAWYQQKPGQAP---R
LLIYG-------AS--SRATGIPDRFSGSG--SGTEFTLT------IS-SLEPEDFVVYY
CQKYSSSP--
>V43RF-AHZZ01104241.1-igkv |(58624, 58924)|3.0|(1.000,1.000,1.000)|1
-VRCDIQMTQSPSFLSASVGDRVTITCQASQSI------S--NDLAWYQQKPGKSP---T
LLIYD-------AT--NLHTGVPSRFSGSG--SGADYSLT------IS-SLELEDFAAYY
CQQEYSYP--
>V45RF-AHZZ01104243.1-igkv |(37856, 38148)|2.85365853484|(1.000,0.896,1.000)|1
-SRGDIVMTQSPAFVSVTPGEKVTITCQASEGIS--------NYLHWYQQKPDQAP---K
LFIQY-------AS--QSISGVPSRFTGSG--SGTDFTFT------IS-SLEVEDAATYY
CQQGN-----
>V46RF-AHZZ01104243.1-igkv |(54085, 54379)|2.99493200206|(1.000,0.996,0.999)|1
--RGDIQMTQSPSSLSASVGDRVTITCRASQSF---------SSLAWYQQKPGKAP---K
LLIYS-------AS--SLQSGVPSRFSGSK--SGTDFTLT------IS-SLQPEDVASYY
CQQYYSYP--
>V47RF-AHZZ01104243.1-igkv |(69226, 69518)|3.0|(1.000,1.000,1.000)|1
-AKCDIQMTQSPSSLSASVGDRVTITCRASQTI------S--SYLAWYQQKPGKVP---K
LLIYA-------AS--SLESGVPSRFSGSG--SGTEFTLT------IS-SLQPEDFATYY
CQQHN-----
>V48RF-AHZZ01104760.1-ighv |(306, 615)|2.96265347361|(1.000,0.967,1.000)|1
-VQGEVQLVESG-GGLAKPGGSLRLSCAASGFTF----SD--HYMHWVRQAPGKGL---E
WISAINS--GGGST--YYAESVKGRFTISRENAKNTLYLQ------MD-SLRAEDTAVYY
CAR-------
>V49RF-AHZZ01104761.1-ighv |(4083, 4398)|3.0|(1.000,1.000,1.000)|1
-VKCEAQLMESG-GGLVQPGGSLRLSCAASGFTF----SD--HYMQWVRQAPGKGL---E
WVGLIRNKADGETT--DYAASVKGRVTTSRDDSKSITYLQ------MN-NLKTEDTAVYY
CAR-------
>V50RF-AHZZ01104763.1-ighv |(4374, 4683)|2.99899600001|(1.000,0.999,1.000)|1
-VQCEVQLVESG-GGLAKPGGSLRLSCAASGFTF----SD--YYMDWVRQAPGKAL---E
WVSGISN--TGGST--WYADSVKGRFTISRENAKNTLYLQ------MS-SLRAEDTAVYY
CAR-------
>V51RF-AHZZ01105091.1-igkv |(457, 757)|2.99396400065|(0.997,1.000,0.997)|1
-ARCDIQMNQSPSSLSASVGDTATITCRASQGI------S--NNLAWYQQKPGKAP---K
LLIYA-------AS--SLESGVPSRFSGSG--SGTEFTLT------IS-SLQPEDFAAYY
CQQYNSLP--
>V52RF-AHZZ01107544.1-trav |(5301, 5591)|2.994900005|(1.000,1.000,0.995)|1
--VNGENVEQHPSTLSVQEGDSSVIKCTYSDSA------S--NYFPWYKQELGKGP---Q
FIIDIR-S--NEH------EKKDQRITVLLNKTAKHFSLH------IT-ETQPGDSAVYF
CAAS------
>V53RF-AHZZ01107544.1-trav |(27803, 28091)|2.99899600001|(1.000,0.999,1.000)|1
VWS-QQKVEQSSGPLSVPEGAIASLNCTYSDSG------S--QSFFWYRQYSGQSP---E
LLMSTY-S--SGD------K-EDGRFTAQLNRASQYVSLL------IR-DSQLSDSATYL
CAV-------
>V54RF-AHZZ01107544.1-trav |(34317, 34614)|2.93850772085|(0.999,0.995,0.953)|1
-GTRAQSVTQLDSQVSVSEGVPVLLRCNYSSSF-----S---PTLFWYVQYPNQGL---Q
LLLKYI-S--GTT-----LVKGINGFEAEFKKSETSFHLT------KA-SAHVSDAAEYF
CAVN------
>V55RF-AHZZ01107544.1-trav |(53747, 54040)|3.0|(1.000,1.000,1.000)|1
-VSRGESVGLHLPTVSVQEGDNSVINCTYSDSA------S--DYFLWYKQESGKGP---Q
SIIDIR-S--NMA------KRQGQRLTVLLNKTMKHLSLQ------IA-ATEPGDSAVYF
CAEN------
>V56RF-AHZZ01107545.1-trav |(4983, 5284)|2.97164868712|(0.983,1.000,0.990)|1
-SGIAQKITQTQPAMFVQEKEAVTLDCTYDTSD-----QN--YGLFWYKQPSSGEM---I
FLILQM-S--YDK-----QNATEGHYSLNFQKARKSVNLV------IS-ASQVGDSATYF
CAMR------
>V57RF-AHZZ01107545.1-trav |(23299, 23593)|3.0|(1.000,1.000,1.000)|1
-RTRGDSVTQMEGPVTLSERAFLTINCTYTATG-----Y---PSLFWYVQYPGEGP---Q
LLLKAT-K--TDE------KGSNKGFEATYRKETTSFHLK------KD-SVQESDSAVYF
CALS------
>V58RF-AHZZ01108247.1-ighv |(744, 1053)|2.97166884009|(0.998,0.980,0.995)|1
-AHSEVQLVQSG-SEVKKPGATVKISCKASGYTF----ID--YYLHWVRQAPGKGL---E
WMGGVDP--EDGEA--DYAQKFQGRVTITADTSTDTAYME------LS-SLRSEDTAVYY
CAR-------
>V59RF-AHZZ01109397.1-igkv |(45, 345)|3.0|(1.000,1.000,1.000)|1
-ARCDIQMTQSPSSLSASVGDRVTITCRASQGI------S--SYLNWYQQKPGKAP---K
LLIYD-------AT--TLQSGVPSRFSGSG--SGTEFTLT------IS-SLQPEDFAVYY
CQQRNSYP--
>V60RF-AHZZ01109397.1-igkv |(20176, 20476)|2.99899600001|(1.000,0.999,1.000)|1
-ARCDIQMTQSPSSLSASVGDRVTITCQASQGI------S--SWLSWYQQKPGKAP---K
LLLYK-------AS--GLQSGVPSRFSGSG--SGTEFTLT------IS-SLQPEDFATYY
CQQFSSAL--
>V61RF-AHZZ01109398.1-igkv |(3225, 3525)|3.0|(1.000,1.000,1.000)|1
-TTGEIVMTQSPATLSLSPGERATLSCRASQSVS--------SRLAWYQQKPGQAP---R
LLIYD-------AS--SRATGIPDRFSGSG--SGTEFTLT------IS-SLEPEDVGVYY
CQQSYSWP--
>V62RF-AHZZ01110760.1-ighv |(1676, 1985)|2.93434247428|(0.988,0.992,0.958)|1
-VLSQVQLQESG-PGLVKPSETLSLTCAVSGASI----S--SNWWSWIRQAPGKGL---E
WIGEINGN-S-GST--NYNPSLKSRVTISKDASKSQFSLK------LS-SVTAADTAVYY
CAR-------
>V64RF-AHZZ01111405.1-ighv |(9460, 9769)|2.96328365264|(0.998,0.996,0.972)|1
-AHSQVQLVQSG-AEVKQPGSSVKVSCKASGYTF----TN--SAMQWVRQTPGQGL---E
WIGWIII--GNGNT--NYAQKFQGRVTITRDTSTSTGYME------LS-SLRSEDTAVYY
CAA-------
>V65RF-AHZZ01113072.1-ighv |(329, 638)|2.95396799578|(1.000,0.994,0.965)|1
-VQCEVQLVESG-GGLVQPGVSLRLSCAASGFTF----SS--TRMNWIRQAPGKKL---E
WVADIKY--DGSEK--YYVDSVKGRFTISRDNAKNSLSLQ------MN-SLRAEDTAVYY
CVR-------
>V66RF-AHZZ01117753.1-igkv |(3232, 3532)|3.0|(1.000,1.000,1.000)|1
-ARCDIQMTQSPSSLSASVGDRVTITCRASQGI------S--TYLNWYQQKPGKAP---K
LLIYA-------AS--RLESGVPPRFSGSG--SGTEFTLT------IS-SLQPEDFATYY
CLQYKSDP--
>V67RF-AHZZ01117754.1-igkv |(5922, 6221)|3.0|(1.000,1.000,1.000)|1
-TTGEIVMTQSPATLSLSPGERATLSCRASQSVS--------SYLAWYQQKPGQAP---R
LLIYG-------AS--SRATGIPDRFSGSG--SGTEFTLT------IS-SLEPEDVGVYY
CQQYNNWN--
>V68RF-AHZZ01117754.1-igkv |(31202, 31502)|2.80662291491|(0.923,0.942,0.945)|1
-TTGEIVMTQSPATLSLSPGEGATLSCRASQSV------G--SYLAWYQQKPGQAP---K
LLIHS-------AY--FRATGIPDRFSGSG--SRTEFTLT------IS-SLEPEDVGVYH
CQQYNDLP--
>V70RF-AHZZ01124687.1-ighv |(302, 609)|2.9700882474|(1.000,1.000,0.973)|1
-AHAQVQLVQSG-PEVKQPGASVKVSCKASGYTF----TS--YGMNWVRQAHGQRL---E
WMGWINT--DSGNP--TYAQGFKERFTFSMDTSISTAYLQ------IS-SLKAEDTAVYY
CA--------
>V71RF-AHZZ01129142.1-ighv |(1012, 1321)|3.0|(1.000,1.000,1.000)|1
-VLSQVQLQESG-PGVVKPSETLSLTCAVSGGSI----S--SYWWGWIRQPPGKGL---E
WIGYIYGS--GSST--NYNPSLKSRVTISKDTSKNQFSLK------LS-SVTAADTAVYY
CAR-------
>V73RF-AHZZ01143621.1-igkv |(14221, 14507)|2.94562999772|(1.000,0.967,0.984)|1
-----IVMTQSPATLSLSPGERATLSCRASQSVS--------SRLAWYQQKPGEAP---R
LLIYD-------AS--SRATGIPARFSGSG--SGTDFTLT------IS-SLEPEDVAVYF
CQQESNW---
>V74RF-AHZZ01150255.1-ighv |(7064, 7379)|2.9958720041|(0.996,1.000,1.000)|1
-VQCEVQLLEYG-GGLVQPGRSLRLSCAVSGFTF----SD--HYMSWVRQAPGKGP---E
WVGFMRNKANGGRT--EYAASVKGRFTISRDDSKSTASLQ------MS-SLKTEDTAVYY
CAT-------
>V75RF-AHZZ01169213.1-igkv |(5365, 5663)|2.72322816252|(0.989,0.856,0.952)|1
-TTGEIVMTQSPATLALSPGERATLSCRASQSVS--------SYLAWYQQKPGQAP---R
LLIYG-------AS--SRATGIPDRFSGSG--SGTEFTLT------IS-SLEPEDVGVYF
CLQSSNW---
>V76RF-AHZZ01176978.1-igkv |(12153, 12453)|3.0|(1.000,1.000,1.000)|1
-ARCDIQMTQSPSSLSASVGDKVTITCHASQGI------S--SWLSWYQQKPGKAP---K
LLIYK-------AS--SLQSGVPSRFSGSG--SGTDYTLT------IS-SLQPEDFATYY
CQQDSSSP--
>V77RF-AHZZ01198213.1-trav |(10234, 10524)|2.99798400013|(1.000,1.000,0.998)|1
-MSRGEDVEQS-LFLSVREGDISVINCTYTDSS------S--TYLYWYKQEPGAGL---Q
LLTYIL-S--NMD------LKRDQRVTVLLNKKDKHLSLR------IA-DTQTEDSAIYF
CAES------
>V79RF-AHZZ01198214.1-trav |(53657, 53950)|3.0|(1.000,1.000,1.000)|1
-GSGKNQVEQSPQSLIILEGKNCTLQCNYTVSP------F--SNLRWYKQDTGKGP---I
SLTIMT-F--SEN------TKSNGRYTATLDADTKQSSLH------IT-AAQLSDSASYI
CVVS------
>V80RF-AHZZ01198216.1-trav |(1076, 1382)|3.0|(1.000,1.000,1.000)|1
VWSQQKEVEQDPGPFSVPEGATVTFNCTYSNSA------S--QSFFWYRQDSRKEP---K
LLMSVY-S--S--------GNEDGRFTAQLNRASQYISLL------IR-DSQLSDSATYL
CAVYTQCSP-
>V81RF-AHZZ01198216.1-trav |(6535, 6832)|2.99798400013|(1.000,0.998,1.000)|1
-GTRAQSVTQLDSQVSVSEGVPVLLRCNYSSSV-----S---PYLFWYVQYPNQGL---Q
LLLKYT-S--GTT-----LVKGINGFEAEFKKSETSFHLT------KA-SAHVSDAAEYF
CAVN------
>V82RF-AHZZ01040804.1-igkv |(3190, 3490)|2.99799600001|(0.999,0.999,1.000)|-1
-TTGQVILTQSPATLSLSPGERATLSCRASQSVS--------NYLAWYQQKPGQAP---R
LLIHS-------AS--SRATGIPDRFSGSG--SGTEFTLT------IS-SLEPEDVGVYH
CYQYYSGY--
>V85RF-AHZZ01040807.1-igkv |(39921, 40221)|2.99696400065|(1.000,0.997,1.000)|-1
-AKCDIQMTQSPTFLSASVGDRVTIACRASQSI------H--KGLAWYQQKPGKAP---K
LLISY-------AS--NLYTGVPSRFSGSG--SGTDFTLT------IS-SLQPEDAATYY
CFQYNSYP--
>V86RF-AHZZ01040808.1-igkv |(17035, 17353)|3.0|(1.000,1.000,1.000)|-1
-ACGDIVMTQSPDSLAVSLGERVTINCKSSQSLLYSSNNK--NYLAWYQQKPGQTP---K
LLISW-------AS--TRESGVPNRFSGSG--SGTDFTLT------IS-GLQAEDVAVYY
CQQHYSTP--
>V87RF-AHZZ01042076.1-igkv |(7808, 8108)|2.98632422844|(1.000,1.000,0.987)|-1
-TRCAIQMTQSPSSLSASVGDRVTITCRASQSI------G--SNLAWYQQKPGKVP---K
LLIYA-------AS--TLQSEVPSRFSGSG--SGTDFTLT------IS-SLQPEDVATYY
CQKCDSAP--
>V88RF-AHZZ01042077.1-igkv |(2202, 2517)|2.95362043638|(1.000,0.960,1.000)|-1
-SSGDIVMTQTPLSLPVTLGEPASISCRSSQSLLSS-NEY--NYLNWYLQKPGQSP---Q
LLIYY-------GS--NRASGVPDRFSGSG--SGTDFTLK------IS-RVEAEDVGVYY
CMQALQTP--
>V89RF-AHZZ01042078.1-igkv |(13394, 13694)|2.99899200002|(0.999,1.000,1.000)|-1
-ARCDIQMTQSPSSLSASVGDRVTITCRASQNI------Y--SNLAWYQQKPGKAP---K
PLIYY-------AS--SLETGVPSRFRGSG--SGTDYTLT------IS-SLQPEDIATYY
CQQYNNSP--
>V90RF-AHZZ01042078.1-igkv |(35394, 35709)|2.96394425777|(1.000,0.994,0.973)|-1
-SSGDVVMTQSPLTLPVTPGQPASISCRSSQSLVHS-DGN--TYLSWYQQKPGQPP---R
LLIYK-------VS--NRYSGVPDRFSGSG--AGTDFTLK------IS-RVEAEDVGVYY
CMQGTKVP--
>V91RF-AHZZ01042078.1-igkv |(45757, 46072)|2.98542016586|(0.999,1.000,0.987)|-1
-SSGDIVMTQTPLSLPVTPGEPASISCRSSQSLLHS-DGY--TYLDWYLQKPGQSP---Q
LLIYG-------GS--NRASGVPDRFSGSG--SGTDFTLK------IS-KVEAEDVGVYY
CMQHRALP--
>V92RF-AHZZ01042079.1-igkv |(5782, 6096)|2.59009576925|(0.976,0.942,0.797)|-1
-SSGDVVLTQTPLSLPVTPGEPASISCRSSQSLLHS-NGN--TYLDWYLQKPGQSP---R
LLIYK-------VT--NRESGVPDRFSGSG--SGTDFTLK------IS-RVEPEDVGVYY
CMQGTKAP--
>V93RF-AHZZ01042080.1-igkv |(4422, 4722)|2.99899600001|(1.000,0.999,1.000)|-1
-ARCDIQLTQSPSSLSASVGDRVTISCRTSQNI------Y--SNLAWYQQKPGKTP---K
LLIYA-------AS--SLQSGIPSRFSGSG--SGTDFTLT------IS-SLQPEDVATYY
CQHGYGTP--
>V94RF-AHZZ01042080.1-igkv |(19769, 20084)|2.99494800078|(1.000,0.997,0.998)|-1
-SSGDIVMTQTPLSLPVTPGEPASISCRSSQSLLHS-NGN--TYLYWYLQKPGQPP---R
LLIYR-------VS--NRFSGVPDRFSGSG--SGTDFTLK------IS-RVEAEDVGVYY
CMQALQNP--
>V95RF-AHZZ01042080.1-igkv |(24756, 25071)|2.98379201242|(0.994,1.000,0.990)|-1
-SSGDIVMTQTPLSLPVTPGEPASISCRSSQSLLHS-NGN--TYLHWYLQKPGQSP---K
LLIYG-------GS--NRASGVPDRFSGSG--SGTDFTLK------IS-KVEVEDVGVYY
CVQAIAFP--
>V96RF-AHZZ01042083.1-igkv |(18979, 19279)|3.0|(1.000,1.000,1.000)|-1
-ARCDIHMTQSPSSLSASVGDRVTITCRASQGI------T--DDLAWYQQKPGETP---K
LLIYE-------AS--SLQSGIPSRFSGSG--SGTEFTLT------IS-SLQLNDSATYY
CQHYYSYP--
>V97RF-AHZZ01042083.1-igkv |(31495, 31813)|2.95219314055|(0.999,0.986,0.971)|-1
-SRGDIMMTQTPLSLPITPGEPASISCRSSQSLLDSDDGY--TYLDWYLQKPGQSP---Q
PLIYF-------VS--SWASGVPDRFSGSG--SGTDFTLK------IS-RVEAEDVGVYY
CMQCIEFI--
>V98RF-AHZZ01042084.1-igkv |(28167, 28465)|2.98297652411|(1.000,1.000,0.984)|-1
-ARCDIQLTQSPSSLSASVGDRVTITCQASQGI------S--NNLAWYQQKPGKVP---K
LLIYK-------AS--TLQSGVPSRFSGSG--SGTDFTLT------IS-SLQPEDFATYY
CQYGYGI---
>V99RF-AHZZ01042085.1-igkv |(3468, 3783)|2.99899600001|(1.000,0.999,1.000)|-1
-TSGDIVMTQTPLSLPVSPGEPASISCRSSQSLLHS-DGY--TYLDWYLQKPGQSP---Q
LLIYL-------VS--NRASGVPDRFSGSG--SGTDFTLK------IS-RVEAEDVGVYY
CEQGTQLP--
>V100RF-AHZZ01042085.1-igkv |(40087, 40402)|2.96189637729|(1.000,0.998,0.968)|-1
-TSGDIVMTQTPLSLPVSPGEPASISCRSSQSLLHS-GGK--TYLYWYLQKPGQSP---Q
LLIRE-------VS--NRASGVPDRFSGSG--SGTDFTLK------IS-PVEAEDVGVYY
CMQGIQLP--
>V101RF-AHZZ01042085.1-igkv |(49587, 49887)|3.0|(1.000,1.000,1.000)|-1
-ARCDIQMTQSPSSLSASVGDRVTITCRASQGI------T--NDLAWYQQKPGETP---K
LLIYE-------AS--SLQSGIPSRFSGSG--SGTDFTLT------IS-SLQPEDFATYY
CQHYYSTP--
>V102RF-AHZZ01042091.1-igkv |(7298, 7613)|3.0|(1.000,1.000,1.000)|-1
-TSGDIVMTQTPLSLSVTPGEPASISCRSSQSLLHS-NGN--TYLHWYLQKPGQSP---Q
LLIYL-------VS--NRASGVPDRFSGSG--SGTDFTLK------IS-RVEAEDVGVYY
CMQGIQLP--
>V104RF-AHZZ01042093.1-igkv |(34873, 35173)|2.99696400065|(1.000,0.997,1.000)|-1
-ARCDIQMTQSPSSLSASVGDRVTITCRASQGI------N--KELDWYQQKPGKAP---T
LLIYA-------AS--SLQTGVSSRFSGSG--SGTDFTLT------IS-SLQPEDVATYY
CQQDYTTP--
>V105RF-AHZZ01042093.1-igkv |(53999, 54314)|2.96015937872|(0.998,0.999,0.967)|-1
-SSGDIVMTQTPLSLPVTPGEPASISCRSSQSLLHS-NGY--TYLYWYLQKPGQSP---Q
LLMYF-------AS--YRASGVPDRFSGSG--SGTDFTLE------IS-RVEAEDIGVYY
CMQGTQLP--
>V106RF-AHZZ01042093.1-igkv |(71557, 71872)|2.95823309455|(0.996,0.987,0.977)|-1
-YSGDIVMTQTPLSLPVIPGEPASISCRSSQSLLDS-DGY--TCLDWYLQKPGQSP---Q
LLIYE-------VS--NRASGVPDRFSGSG--SVTDFTLK------IS-RVEAEDVGVYY
CMQSIEFP--
>V108RF-AHZZ01042093.1-igkv |(102084, 102402)|2.99798400013|(1.000,1.000,0.998)|-1
-SSGDIVMTQTPLSLPVTPGEPASISCRSSQSLLDSDDGN--TYLDWYLQKPGQSP---Q
LLIYE-------VS--NRASGVPDRFSGSG--SDTDFTLK------IS-RVEAEDVGVYY
CMQSTEYP--
>V109RF-AHZZ01042093.1-igkv |(120004, 120320)|2.90963747374|(0.983,0.981,0.950)|-1
-TSGDILLTQTPLSLPVTPGEPASISCRSSQSLLHS-NEN--TYLHWYLQKPGQSP---Q
LLICE-------VS--NRASGVPDRFSGSG--SDTDFTLK------IN-LVEAEDVGVYY
CMQTTQWP--
>V110RF-AHZZ01042093.1-igkv |(124902, 125217)|2.99192000218|(0.998,1.000,0.994)|-1
-SSGDIVMTQTPLSLPVTLGEPTSISCRSSQSLVYS-DGK--TYLHWYLQKPGQSP---Q
LLMYL-------VS--NRASGVPDRFSGSG--SGTDFTLK------IS-RVEAEDVGVYY
CMQTLRSP--
>V112RF-AHZZ01042093.1-igkv |(133001, 133301)|2.99593600205|(1.000,0.996,1.000)|-1
-ARCDTQMTQSLSSLFASVGDRVTITCRASQGI------N--NELAWYQQKPGKAP---T
LLLYS-------GS--SLHTGVPSQFSGSG--SGTDFTLT------IS-SLQPEDVATYY
CRQDYTTP--
>V113RF-AHZZ01042093.1-igkv |(141218, 141533)|2.96559865717|(0.999,0.975,0.994)|-1
-SSGDIVMTQTPLSLPVTPGEPSSISCRSSQSLLDS-YGY--TNLNWYLQKPGQSP---Q
LLIYE-------VS--NRASGVPDRFSGSG--SGTDFTLK------IS-KVEAEDVGVYY
CMQTPQTP--
>V114RF-AHZZ01042093.1-igkv |(150847, 151147)|3.0|(1.000,1.000,1.000)|-1
-ARCDIQMTQSPSSLSASVGDRVTITCQASQGI------S--NNLNWYQQKPGKTP---K
LLIYA-------AS--SLQSGIPSRFSGSG--SGTDFTLT------IS-SLQPEDFATYY
CQQRYSAP--
>V115RF-AHZZ01042093.1-igkv |(165765, 166067)|2.98771202074|(1.000,0.994,0.994)|-1
-TSGDIVMTQTPLSLPVSPGEPASISCRSSQSLLHS-NGN--TYLHWYLQKPGQSP---Q
LLIYE-------VS--NWASGVPDRFSGSG--SGTDFTLK------IS-RVEAEDVGVYY
CEQG------
>V116RF-AHZZ01042093.1-igkv |(173599, 173899)|2.99699200002|(0.999,1.000,0.998)|-1
-ARCDIQMTQSPSALSASVGDRVTISCRASQNI------Y--SGLAWYQQKPGKAP---K
LLIYD-------AS--GLQSGIPSQFSGSG--SGTDFTLT------IS-SLQPEDSATYY
CQHYYDTP--
>V117RF-AHZZ01042094.1-igkv |(1120, 1438)|2.97488623715|(1.000,0.977,1.000)|-1
-TSGDIVMTQTPLSLPVTPGEPASISCRSSQSLFNSDYAN--TYLDWYLQKPGQSP---Q
LLIYM-------LS--NRASGVPDRFSGSG--SGTDFTLK------IS-RVEAEDVGVYY
CMQSIEYP--
>V118RF-AHZZ01044061.1-trav |(5488, 5785)|2.90890959463|(0.970,0.945,1.000)|-1
-GLRAQLVTQPEDQVTVAERNPLTVKCTYSVSG-----N---PYLFWYVQYPNQGL---Q
FLLKYI-T--GDN-----LVKGSYGFEAEFNKSQTSFHLK------KP-SALVSDSALYF
CAVR------
>V121RF-AHZZ01067647.1-trbv |(19172, 19469)|2.95535067488|(0.997,1.000,0.963)|-1
--PLEAQVTQNPRYLITVTGKKLTVTCSQNMNH---------DYMSWYRQDPGLGL---R
QIYYSS-N--VELV---DKGDIPEGYNVSRKE-KRNFPLI------LE-SPSPSQTSLYF
CASSL-----
>V122RF-AHZZ01067647.1-trbv |(24494, 24801)|2.99899600001|(1.000,1.000,0.999)|-1
--LVDVKVTQSSRYLIKRTGEKVFLECVQDMDH---------ERMFWYRQDPGLGL---R
LIYFSY-D--VKVN---EKGDIPEGYSVSREK-KERFSLI------LG-SASTNQTSMYL
CASSLSTA--
>V123RF-AHZZ01067647.1-trbv |(37999, 38302)|2.80182732495|(0.957,0.891,0.972)|-1
-SVFSAVVSQKPSRDVCQRGTSVTIQCQVDSQL---------TMMFWYRQQPGLSM---T
LIATANQG--SEAT--YESGFVIDKFPISRPN-LTFSTLT------VS-NTNPEDSSIYL
CSVE------
>V124RF-AHZZ01067648.1-trbv |(3732, 4029)|2.99496000066|(0.999,1.000,0.996)|-1
--LMEADIYQNPRHRVIGTGKKITLECSQTMGH---------DKMYWYQQDPGMEL---H
LIHYSY-G--VNST---ERGDFSSESTVSRIR-IEHFPLT------LE-STSPSHTSQYL
CASSE-----
>V125RF-AHZZ01067649.1-trbv |(1785, 2085)|2.99698000014|(0.998,0.999,1.000)|-1
--HAEAGVSQDPRHKITKTGQNVSFKCVPISEH---------NRLYWYRQTLGQGP---E
FLTYFQ-N--EAQQ--DRSGLFSDRFSAERPE-GSISTLM------IQ-HTEQGDSAVYL
CASSL-----
>V126RF-AHZZ01067649.1-trbv |(16676, 16973)|2.99899600001|(1.000,1.000,0.999)|-1
--HMDAGITQSPRHKITETGTPVTLRCHQTENH---------RYMYWYRQDLGNGL---R
LIHYSY-G--VEDT---DKVEISDGYSVSRSK-TEDFLLT------LE-SATRSQTSVYF
CASSE-----
>V128RF-AHZZ01067649.1-trbv |(33773, 34073)|2.82562565204|(0.952,0.923,0.954)|-1
--HTDAGVIQSPRHEVTEMGKEVTLRCEPISGH---------SSLFWYRQSMMRGL---E
FLIYFN-N--KSPI--DDSGMPKDRFSATMPN-ASFSTLK------IQ-PSEPRDSAMYF
CASSL-----
>V129RF-AHZZ01067649.1-trbv |(37056, 37356)|2.9409000027|(0.980,0.977,0.984)|-1
--HTDAGVIQSPRHEVTEMGKEVTLRCEPISGH---------TYLFWYRQSMMQGL---E
FLIYFN-D--KSPI--DDSGMPKDRFSATMPN-ASFSTLK------IQ-PSEPRDSAVYF
CASSL-----
>V130RF-AHZZ01067649.1-trbv |(52456, 52756)|2.99196000066|(0.996,0.999,0.997)|-1
--LIDAGVTQTPRHKVTEMGQEVTMRCQPILGH---------NTVFWYRQTVMQGL---E
LLVYLR-N--KASL--DDSGMPKDRFSAEMPD-ASLATLK------IQ-PSEPRDSAVYL
CASGL-----
>V131RF-AHZZ01067649.1-trbv |(59401, 59701)|2.98066002957|(0.994,1.000,0.987)|-1
--HTEAGVTQFPSHRVIEKGQTVTLRCDPISGH---------DYLYWYRRVMGKEI---K
FLIYFM-R--ASVQ--DESGMPNKRFSAERTG-GTYSTLK------VQ-PAELEDSGVYF
CASSQ-----
>V133RF-AHZZ01067649.1-trbv |(69483, 69783)|2.9878720041|(0.996,1.000,0.992)|-1
--SPGEEVTQTPKHLVKGEGQKAKLYCDPIKGH---------SYVFWYQQVLRKEF---K
FLISFQ-N--KNVF--DETGMPKERFSAKCPA-NSPCSLE------IQ-ATKLKDSAVYF
CASSQ-----
>V134RF-AHZZ01067649.1-trbv |(89894, 90191)|2.98558408012|(0.998,1.000,0.988)|-1
--TVDGGITQSPKYLFRKEGQNVTLSCEQNLNH---------DAMYWYRQDPGQGL---R
LIYYSQ-I--VNDI---QNGDIAEGYSVSRDR-KESFPLT------VT-SAQRNPTAFYL
CASSI-----
>V135RF-AHZZ01067649.1-trbv |(108243, 108543)|2.94947496801|(0.996,0.959,1.000)|-1
--SADTKVTQRPRLLVKANEQKAKMDCVPVKGH---------SYVYWYRKKLDEEL---K
FLVYFQ-N--EEII--QKAEIINERFSAQCPQ-NSPCTLE------IQ-STESGDAALYF
CASSK-----
>V136RF-AHZZ01067649.1-trbv |(117153, 117458)|2.88974188868|(0.996,0.959,0.949)|-1
--SFHAEVTQTPGYLVKGKGQKTKIDCTPEKGH---------TYVYWYQQNQNKEF---T
FLISFQ-D--EQVL--QETELHKKRFSSQCPK-NLPCSLE------IP-SSEPGDTALYL
CASSQST---
>V137RF-AHZZ01067649.1-trbv |(129327, 129625)|2.96874003277|(0.992,0.993,0.984)|-1
--SMDADVTQTPRNSIAKTGKRIMLECSQTKGH---------DQMYWYRQDPGLGL---R
LIFYSF-D--VEDI---NKGEISDGYSASRQE-QAKFSLS------LE-SATPNQTALYF
CATSD-----
>V138RF-AHZZ01067651.1-trbv |(1632, 1932)|2.99899600001|(1.000,0.999,1.000)|-1
--HTGAGVSQSPRYKVTKRGQDVALRCDPISGH---------DYLYWYQQALGQGP---E
LLTYFN-Y--EAQQ--DKSGLPNDRFSADRPE-GSVSTLK------IQ-RTEQRDSAVYL
CASSL-----
>V139RF-AHZZ01067651.1-trbv |(6692, 6982)|2.98768003481|(1.000,0.996,0.992)|-1
----DAGVTQSPTHLIKMRGQQVTLRCSPISGH---------TSVSWYQQALGQGP---Q
LIFEYD-R--KEER---VRGNFLDRFSGRQFP-NYSSELN------VN-ASEMGDSALYL
CASSL-----
>V140RF-AHZZ01067651.1-trbv |(13303, 13600)|3.0|(1.000,1.000,1.000)|-1
--PGNAGVTQTPKFQILKTGQSMTLQCAQDMNH---------NYMSWYRQDPGVGL---R
LIHYSV-G--AGVT---DKGEVSNGYNVSRLN-TEDFPLS------LE-SAASSQTSVYF
CASSY-----
>V142RF-AHZZ01067651.1-trbv |(27974, 28285)|2.84253608204|(0.943,0.947,0.953)|-1
--PVEPGVTQSPTHLIKTRGQQVILRCSPISGH---------SSVYWYQQALGQGP---Q
FIFEYC-Q--KEER---GRGNFPDRFSGRQFP-NYSSELN------VS-ALLLGDSALYL
CASSLAQPAE
>V143RF-AHZZ01067651.1-trbv |(47891, 48187)|3.0|(1.000,1.000,1.000)|-1
--PVDAGVTQSPTHLIKTRGQQVTLRCSPISGH---------TSVYWYQQALGQGP---Q
FIFQYY-E--KEER---ERGNFPDRFSGRQFP-NYSSELN------VS-ALLLGDSALYL
CASSL-----
>V144RF-AHZZ01067651.1-trbv |(55192, 55483)|2.99389600501|(1.000,0.999,0.995)|-1
----NADVTQTPKFRVLKTGQSMIVQCAQDMKH---------DYMFWYRQDPGMGL---R
LIYYSV-T--AGIT---TKGEVPNGYNVSRIN-TEDFLLR------LE-SAALSQTSVYF
CASSY-----
>V145RF-AHZZ01067651.1-trbv |(59487, 59787)|3.0|(1.000,1.000,1.000)|-1
--HTGAGVSQSPRYKVIKKGQDVALRCDPISGH---------AALYWYQQALGQGP---E
FLTYFN-Y--QAQP--DKSGLPNDRFSAERSE-GSVSTLT------IQ-RTEQQDSAVYL
CASSL-----
>V146RF-AHZZ01067651.1-trbv |(68255, 68551)|2.78653347192|(0.978,0.970,0.878)|-1
--PVIAGVAQSPTHLIKTRGQQVTLRCSPISGH---------NTVYWYQQALGQGP---Q
LIFQYY-R--GEDR---GRGNFPERFSGHQFP-NYSSELN------VS-ALLLGDSALYL
CASSL-----
>V147RF-AHZZ01067652.1-trbv |(695, 992)|3.0|(1.000,1.000,1.000)|-1
--PVNAGVTQTPKFQVLKTGQSMTLQCAQDMNH---------DCMYWYRQDPGMGL---R
LIHYSV-G--EGST---DKGEVPDGYNVTRSN-TEDFPLR------LE-SAAPSQTSVYF
CASSY-----
>V148RF-AHZZ01067652.1-trbv |(5225, 5525)|2.99798400013|(1.000,0.998,1.000)|-1
--HTGAGVSQSPRYKVTKRGQDVALRCDPISGH---------DYLYWYQQAPGQGP---E
FLTYFQ-N--DAQR--DKSGLPNDRFSAERTE-GSVSTLK------IQ-RTEQADSAVYL
CASSL-----
>V149RF-AHZZ01067652.1-trbv |(13142, 13432)|2.82846247636|(0.979,0.979,0.897)|-1
----DAGVTQSPTHLIKTRGQQVTLRCSPISGH---------TSVSWYQQALGQGL---Q
FILWYD-E--EEER---GRGTFPHRFSGHQFP-NYSSELN------VN-ASEVGDSALYL
CASSL-----
>V151RF-AHZZ01067652.1-trbv |(24517, 24817)|3.0|(1.000,1.000,1.000)|-1
--HTGAGVSQSPRYKVTKRGQDVALRCDPISGH---------VALYWYQQALGQGP---E
FLTYFQ-N--DAQP--DKSGLPSDRFSAERPE-GSVSTLK------IQ-RTQQGDAAVYL
CASSL-----
>V152RF-AHZZ01067652.1-trbv |(35002, 35298)|2.99289600501|(0.999,0.994,1.000)|-1
--SVDGGVTQSPRHLIKTTGQQVTLRCSPISGH---------TSVSWYQQALGQGP---Q
FIFEYY-E--EKER---ERGNFPDRFSGHQFP-NYSSELN------VN-ALEAGDSALYL
CASSL-----
>V153RF-AHZZ01067652.1-trbv |(38310, 38607)|2.99385601037|(1.000,1.000,0.994)|-1
--LVNAGVTQTPKFQVLKTGQSMTVQCAQDMNY---------NFMYWYRQDPGVGL---R
LIHYSG-A--AGTT---DKGEVPSGYNVSRLN-TEIFPLR------LE-SAAPSQTSVYI
CASSY-----
>V154RF-AHZZ01067652.1-trbv |(42887, 43187)|2.98296000066|(0.995,0.996,0.992)|-1
--HTGARVSQSPRYKVTKRGQDVALRCDPISGH---------DYLYWYQQALGQGP---E
LLTYFS-Y--EAQQ--DKSGLPSDRFSAERPE-GSVSTLK------IQ-RTQQWDSAMYL
CASSL-----
>V155RF-AHZZ01067652.1-trbv |(53188, 53484)|2.66350187508|(0.995,0.906,0.862)|-1
--SVDAGVTQSPTHLIRKRGQQVTLRCSPISGH---------NTVSWYQQALGQGP---Q
FIFQYY-E--KEER---GRGNFPDRFSGHQFP-NYSSELN------VN-ASEMGDSALYL
CASSL-----
>V156RF-AHZZ01067653.1-trbv |(5340, 5640)|2.99088400513|(0.998,1.000,0.993)|-1
--HTGAGVSQSPSNKVTEKGKDVVLRCDPISGH---------AVLYWYRQNLGQGL---E
FLIYFQ-G--KGAV--DDSGLCSDRFSATRPE-GSASTLK------IQ-HTEQGDSAMYF
CASSL-----
>V157RF-AHZZ01067653.1-trbv |(10391, 10687)|2.97553608204|(0.994,0.984,0.998)|-1
--SVDTGVTQSPTHLIKTRGQQVTLRCSPISGH---------NTVSWYQQTPGQGP---Q
FIFEYA-N--ELRT---SEGNFPHRFSGRQFR-DYHSEMN------VS-ALELGDSALYL
CASSL-----
>V158RF-AHZZ01067653.1-trbv |(13070, 13360)|2.99385601037|(1.000,0.994,1.000)|-1
----DCGVTQTPKHLITAIGQQVTLRCSPRSGD---------LSVYWYQQSLGQGL---Q
FLIQYY-N--GEER---AKGNILERFSAQQFP-DLHSELN------LS-SLELGDSALYF
CASSL-----
>V161RF-AHZZ01067653.1-trbv |(43250, 43547)|2.85217355131|(0.985,0.899,0.998)|-1
--HRDAEITQSPRHKVTETGRQVTLTCHQTWNH---------NNMFWYRQDLGHGL---R
LIYYSA-G--ASII---DKGEVPDGYVVSRSK-TEDFPLT------LE-SATRSQTSVYF
CASSE-----
>V163RF-AHZZ01067655.1-trbv |(10936, 11249)|2.99174403277|(1.000,1.000,0.992)|-1
--SLDTAVSQTPKYLVTQTGKNESLKCEQNLGH---------NAMYWYKQDSKKLL---K
IMFIYN-N--KEPI---LNETVPNRFSPKSPD-KAHLNLH------IK-SVELGDSAVYF
CASSQDTALQ
>V164RF-AHZZ01067655.1-trbv |(14360, 14657)|2.91229270938|(0.975,0.998,0.945)|-1
--PMDTGVTQTPRHLVMGMTNKKSLKCEQHLGH---------NAMYWYKQKAKKPP---E
LMFIYN-F--KEP---AENNSVPSRFVPECPD-SSLFYLH------LR-ALQPEDSALYL
CASSQ-----
>V165RF-AHZZ01067655.1-trbv |(26234, 26531)|3.0|(1.000,1.000,1.000)|-1
--LVNAGVTQTPKFQVLKTGQNMTLKCAQDMNH---------DRMYWYRQDPGMGL---R
LIHYSA-G--EGST---EKGEVSNGYNASRLN-KKDFLLR------LE-SAAPSQTSMYF
CASSE-----
>V166RF-AHZZ01067655.1-trbv |(28925, 29222)|3.0|(1.000,1.000,1.000)|-1
--PVNAGVTQTPKFQILKTGQNMTLKCAQDMNH---------NYMYWYRQDPGMGL---R
LIHYSA-G--EGST---EKGEVPDGYNASRLN-PQNFLLR------LE-SAAPSQTSMYF
CASSE-----
>V167RF-AHZZ01067655.1-trbv |(32665, 32965)|2.99899600001|(1.000,0.999,1.000)|-1
--HTGAGVSQSPRNKVTEEGKDVVLRCDPISGH---------TALYWYRQSLGKGL---E
FLIYFQ-G--NDAP--DKSGLPSGRFSAERTE-GSVSTLK------IQ-RTEQGDSAVYL
CASSL-----
>V169RF-AHZZ01067656.1-trbv |(14292, 14589)|3.0|(1.000,1.000,1.000)|-1
--PLDTAVFQTPKYLVTQTGKKESLKCEQNLGH---------DTMYWYKQDSKKLL---K
IMFIYS-N--KEPI---LNETVPNRFSPDSPD-KAHLNLH------IK-SVELGDSAVYF
CASSQ-----
>V170RF-AHZZ01067656.1-trbv |(18626, 18923)|3.0|(1.000,1.000,1.000)|-1
--PTDTGVTQTPKHLVMGMTNKKSLKCEQHLGH---------NAMYWYKQKAKKPP---E
LMFIYN-Y--EKL---SINESVPSRFSPECSK-SSLLYLH------LR-ALQPEDSALYL
CASSQ-----
>V171RF-AHZZ01067656.1-trbv |(37172, 37469)|3.0|(1.000,1.000,1.000)|-1
--PANADVTQSPKFQILKTGQSMTLQCAQDMNH---------NSMYWYRQDPGMGL---R
LIHYSA-T--KDTT---DPGEVPDGYSVSRLN-KKEFLLK------LE-SAAPSQTSVYF
CASSE-----
>V172RF-AHZZ01067659.1-trbv |(1934, 2234)|2.53437564642|(0.981,0.991,0.752)|-1
--HTEPEVTQTPSHQVTQMGQEVILRCVPISNH---------LYFYWYRQILGQKV---E
FLVSFY-N--GKIS--EQSEIFDDRFSVGRSD-GVHFTLK------IK-STKLEDSAMYF
CASSE-----
>V173RF-AHZZ01069458.1-ighv |(21609, 21918)|2.99699200002|(0.999,1.000,0.998)|-1
-VQCEVQLVESG-GGLVQPGASLRLSCEASGFTF----GD--YAMSWVHQAPGKGL---E
WVSSISYT--GKNI--YYADSVKGRFTISRDNAKNSLSLQ------MN-SLKTEDTAVYY
CTR-------
>V174RF-AHZZ01069458.1-ighv |(26822, 27131)|3.0|(1.000,1.000,1.000)|-1
-VQCEVQLVESG-GGLVQPGGSLRLSCAASGFTF----SS--YDMSWVRQAPGKGL---E
WVSYISN--GGGST--YYADSVKGRFTISRDNSKNTLSLQ------MN-SLRAEDTAVYY
CAK-------
>V175RF-AHZZ01069461.1-ighv |(27499, 27811)|2.99899200002|(0.999,1.000,1.000)|-1
-VLSQVQLQESG-PGLVKPPETLSLTCAVSGGSI----SDS-YYWSWIRQPPGKGL---E
WIGYIYGG--SGST--SYNPSLKSRVTLSVDTSKNQFSLK------LS-SVTAADTAVYY
CAR-------
>V176RF-AHZZ01084887.1-ighv |(16319, 16625)|2.99067605248|(1.000,1.000,0.991)|-1
--CAEVQLVQSG-AEVKRPGESLRISCKTSGYSF----TS--YWISWVRQMPGKGL---E
WMGMIDP--SDSDT--RYSPSFQGQVTISADKSISTAYLQ------WS-SLKASDTATYY
CAR-------
>V177RF-AHZZ01084890.1-ighv |(9388, 9701)|2.99899600001|(1.000,1.000,0.999)|-1
-VQCEVQLVESG-GGLVQPGGSLRLSCAASGFTF----SN--SWMNWVRQAPGKGL---E
WVARIKSKADGETA--DYAASVKGRFTISRDDSKNTLYLQ------MN-SLKTEDTAVYY
CT--------
>V178RF-AHZZ01084890.1-ighv |(28760, 29069)|2.96063747374|(1.000,0.967,0.998)|-1
-VQGEVQLVESG-GGLAKPGGSLRLSCAASGFTF----SN--YWMYWVRQAPGKGL---E
WVSAINT--GGGST--YYADSVKGRFTISRENAKNTLYLQ------MN-SLRAEDTAVYY
CAK-------
>V179RF-AHZZ01084892.1-ighv |(6822, 7131)|2.4768190316|(0.989,0.988,0.732)|-1
-VQCEVKLVESG-GGLVQPGGSLRLSCAISGFTF----SN--YWMFWVRQAPGKGL---E
WVSSISG--SSSST--YYPDSVKGRFTISRDNAKNTLYLQ------MN-SPRAEDTAVYY
CAR-------
>V180RF-AHZZ01084892.1-ighv |(16134, 16440)|2.96974467291|(0.983,0.988,1.000)|-1
-VQCEVQLVAYG-GGLQQPGGSLRLSCG---FTF----SD--HYMSWIRQAPGKGP---E
WVGFMRNKANGGTT--EYATSVKGRFTISRADSKSMASLQ------MS-SLNTEDTAVYY
CAR-------
>V181RF-AHZZ01084892.1-ighv |(32791, 33100)|2.99696400065|(1.000,1.000,0.997)|-1
-VQCEVQLVESG-GGLVQPGGSLRLSCAASGFTF----SD--YWMDWVRQAPGKGL---E
WVSSVSGS--SSNT--YYPDSVKGRFTISRENAKNTLYLQ------MN-SLRAEDTAVYY
CAR-------
>V182RF-AHZZ01084893.1-ighv |(12328, 12643)|3.0|(1.000,1.000,1.000)|-1
-VQCEVQLVESG-GGLVQPGRSLRLSCAASGFTF----SN--YYMDWVRQAPGKGL---E
WVGRIRNKANSYTT--EYAASVKGRFTISRDDSKNTLYLQ------MS-SLKTEDTAVYY
CAR-------
>V183RF-AHZZ01084896.1-ighv |(1010, 1319)|2.96328365264|(0.998,0.996,0.972)|-1
-VCAEVQLVQSG-AEVKRPGESLRISCKTSGYSF----TG--SWISWVRQMPGKGL---E
WMGSIYP--GDSDT--RYNPSFQGQVTISADKSISTAYLQ------WS-SLKASDTATYY
CAK-------
>V184RF-AHZZ01089506.1-iglv |(19553, 19862)|2.8448212941|(0.993,0.892,1.000)|-1
-SWAQSVLTQPP-SASEAPGQRVTISCSGSSSNI---G-S--NYVNWYQQLEGKAP---K
LLIYN-------NN--QRPSGVPDRFSGSK--SGTSASLT------IS-GLQSEDEADYY
CAAWDNSLNG
>V185RF-AHZZ01089506.1-iglv |(37855, 38165)|2.98106440553|(1.000,0.985,0.997)|-1
-SLSQPVLTQPA-SLSASPGASARLTCTLSSGIN---VGS--YRIYWYQQKPGSPP---R
YLLNYY-S--DSDK--DQGSGVPSRFSGSKDASANAGLLL------IS-GLQSEDEADYY
CAI-------
>V186RF-AHZZ01089506.1-iglv |(48570, 48877)|2.99598000014|(0.999,1.000,0.997)|-1
-SWAQSVLTQPP-SVSAAPGQKVTISCSGSSSNI---G-S--KYVSWYQQLPGTAP---K
LLIYD-------NN--KRPSGISDRFSGSK--SGTSATLA------IT-GLQTGDEADYY
CAAWDNSLS-
>V187RF-AHZZ01089506.1-iglv |(53590, 53897)|2.99798400013|(1.000,1.000,0.998)|-1
-SWAQSVLTQPP-SVSGDPGQRVTISCTGSSSNI---G-G--YYVYWYQQLPGTAP---K
LLIYD-------NN--KRPSGVSDRFSGSK--SGTSASLT------IT-GLQPGDEADYY
CGAWDSSLS-
>V188RF-AHZZ01089506.1-iglv |(59408, 59715)|2.98542016586|(0.999,1.000,0.987)|-1
-SRAQSVLTQPP-SVSGAPGQKVTISCTGSSSNI---G-G--YNVYWYQQLPGTAP---K
LLIYD-------NN--KRPSGISDRFSGSK--SGTSASLA------IT-GLLPEDEADYY
CQSYDSSLS-
>V189RF-AHZZ01089506.1-iglv |(83472, 83782)|2.9164123118|(1.000,0.987,0.943)|-1
-SLSQPVLTQPA-SLSASPGASASLTCTFSGGIN---VAG--YYIYWYQQKPGSPP---R
YLLRYK-S--DSDK--GQGSGVPSRFSGSKDASANTGILR------IS-GLQSEDEADYY
CAI-------
>V190RF-AHZZ01089506.1-iglv |(88028, 88337)|2.99899600001|(1.000,0.999,1.000)|-1
-SWAQSVLTQPR-SASEAARKSVTISCSGSSSNI---G-S--NSVSWYQQLPGTAP---K
LLIYY-------ND--QRASGVSDRFSGSK--SGTSASLA------IS-GLQTEDEADYY
CTAWDDSLSG
>V192RF-AHZZ01089507.1-iglv |(10483, 10793)|2.76901868062|(0.999,0.987,0.859)|-1
-SLSQPVLTQPA-SLSASPGASASLTCTFSGGIN---VAG--YYIYWYQQKPGSPP---R
YLLWYK-S--DSDK--GQGSGVPSRFSGSKDASANTGILR------IS-RLQSEDEADYY
CAI-------
>V193RF-AHZZ01089507.1-iglv |(15336, 15645)|2.77130331821|(1.000,0.997,0.855)|-1
-SWAQSVLTQPP-SASGAPGQSVTISCSGSSSNI---R-G--NGVHWYQQLSGTAP---K
LLIYN-------NN--QRPSGVPDRFSGSK--SGTSASLA------IT-GLRPEDEADYY
CEAWDDSLSG
>V195RF-AHZZ01089508.1-iglv |(11286, 11596)|2.80914918779|(0.999,0.892,0.967)|-1
-SLSQPVLTQPT-SLSASPGASARLTCTLRSGIS---VGS--YRIFWYQQKPGSPP---R
YLLWYK-S--DSDK--HQGSGVPSRFSGSKDASANAGILL------IS-GLQSEDEADYY
CTT-------
>V196RF-AHZZ01089508.1-iglv |(16094, 16403)|3.0|(1.000,1.000,1.000)|-1
-SWAQSVLTQPP-SASGAPGQRVTISCSGSSSNI---G-S--NNVYWYQQFPGTAP---K
LLIYY-------SN--QRPSGVPDRFSGSK--SGTSASLA------IT-GLRSEDEADYY
CAAWDDSLSS
>V197RF-AHZZ01090491.1-ighv |(1149, 1458)|2.99798400013|(1.000,1.000,0.998)|-1
-VQCEVQLVESG-GGLVKPGASLRLSCAASGFTF----SS--YGMHWVRQAPGKGL---E
WVSSISS--DSSYI--YYADSVKGRFTISRDNAKNSLSLQ------MN-SLRAEDTAVYY
CAR-------
>V198RF-AHZZ01090492.1-ighv |(8844, 9153)|2.9803601679|(0.999,0.995,0.987)|-1
-AHSQVQLVQSG-AEVKKPGSSVKVSCKASGYTF----TD--YYMHWVRQAPGQGL---E
WMGEINP--KTGGT--NYAQKFQGRVTMTRDTSTSTAYME------LS-SLRSEDTAVYY
CAT-------
>V199RF-AHZZ01090492.1-ighv |(11745, 12060)|2.99035210496|(0.991,1.000,1.000)|-1
-VQCEVQLVESG-GGLVQPGGSLRLSCAASGFTF----SN--HCMSWVRQAPGKGP---E
WVGLIRNKANGGRA--EYAASVKGRFTISRDDSKSIASLQ------MN-SLKTGDTAVYY
CTR-------
>V200RF-AHZZ01090494.1-ighv |(1969, 2281)|2.99593600205|(1.000,0.996,1.000)|-1
-VLSQVKLQESG-PGLVKPSETLSLTCTVSSGSI----SD-SYYWSWIRQAPGKGL---E
WIGRIYSS--GSST--NYNPSLKNRVTISTDTSKNQFSLK------LS-SVTAADTAVYY
CAR-------
>V201RF-AHZZ01090495.1-ighv |(1255, 1564)|2.96526365316|(0.997,1.000,0.971)|-1
-AQSQVQLVQSG-AEVKKPGASVKLSCKASGFTF----IS--YAISWVRQAPGQGL---E
WMGEIIP--AFGIA--DYAQKFQGRVTITADTSTSTAYME------LS-SRRSEDTAVYY
CAR-------
>V202RF-AHZZ01093946.1-trav |(12355, 12645)|2.99498000014|(0.998,0.997,1.000)|-1
-VSSEDKVMQNPLSLVVHEGDTVTLNCSYEVVN------F--QSLLWYKQEK-KAP---T
FLFTLT-S--SGI------EKKSGRLSSILDKKDFFSILN------IT-ATQTRDSAVYL
CAVE------
>V203RF-AHZZ01093949.1-trav |(3892, 4191)|2.99385601037|(1.000,1.000,0.994)|-1
--VNGQQIMQIPQYQHVQEGEDFTTYCNSSTTL---------NNIQWYKQRPGGHP---V
FLIMLV-K--SGE------VKKQKRLTFQFGEAKKNSSLH------IT-ATQTTDVGSYF
CAGHSAPQ--
>V204RF-AHZZ01093949.1-trav |(14852, 15142)|2.66546075075|(0.931,0.813,0.989)|-1
--TIIDAKTTQPTSMDCAEGRAANLPCNHSTIG-----GN--EYIHWYRQIHSQGP---Q
YVIHGL-K--NNETNAMAS------L--IITEDRKSSTLI------LP-HATLRDTAVYY
CIVRV-----
>V206RF-AHZZ01093949.1-trav |(61192, 61479)|2.80128760087|(0.948,0.890,0.981)|-1
--VRSQKPVQSPQVVILQEGEDAIINCNSSK-------AL--YSVHWYRQKHGEAP---V
FLMILL-K--GGEQKSHDK------IVATFNEKKQQSSLY------LM-ASQLSYSRTYF
CGAE------
>V208RF-AHZZ01093953.1-trav |(7506, 7806)|2.97198400013|(0.990,0.992,0.990)|-1
-SSVAQKVTQAQSSVSMPVGKAVTLNCQYETSSW----S---YDLFWYKQPPSKEM---I
FLIRQG-Y--SEQ-----NA-RNGRYSVNFQKAASSIALT------IS-ALQLEDSATYF
CALRE-----
>V209RF-AHZZ01096568.1-ighv |(3158, 3467)|3.0|(1.000,1.000,1.000)|-1
-VLSQVQLQESG-PGLVKPSETLSLTCAVSGGSI----SS--SYWNWIRQAPGKGL---E
WIGRIYSS--GSST--NYNPSLKNRVTISTDTSKNQFSLK------LS-SVTAADTAVYY
CAR-------
>V210RF-AHZZ01096568.1-ighv |(16270, 16579)|3.0|(1.000,1.000,1.000)|-1
-VQGEVQLVESG-GGLAKPGGSLRLSCAASGFTF----SS--YGMSWVRQAPGKGL---E
WVSAISS--GGGST--YYADSVKGRFTISRDNSKNTLSLQ------MN-SLRAEDTAVYY
CAK-------
>V211RF-AHZZ01096572.1-ighv |(422, 737)|2.997|(0.999,0.999,0.999)|-1
-VQCEVQLVESG-RGLVQPGGSLRLSCAVSGFTF----SD--HYMSWVRQAPGKGP---E
WVGFMRNKANGGRT--EYAASVKGRFTISRDDSKSTPSLQ------MS-SLNTEDTAVYY
CAR-------
>V212RF-AHZZ01096574.1-ighv |(7206, 7516)|2.99798400013|(1.000,1.000,0.998)|-1
-VQCEVQLVESG-GGLAQPGGSLRLSCVASGFTF----SD--HYMDWVRQAPGKGL---E
WVSSISTG-SGSTT--LYPDSVKGRFTISRDNAKNTVYLQ------MN-SLRAEDTAVYY
CA--------
>V213RF-AHZZ01096575.1-ighv |(832, 1141)|2.99294800078|(0.998,1.000,0.995)|-1
-AHSEVQLVQSG-AEVRKPGATVKISCKASGYTF----TD--YYLSWVRQAPGKGL---E
WMGCVDP--EDGEA--IYAQKFQGRVTITADTSTDTAYME------LS-SLRSEDTAVYY
CAR-------
>V214RF-AHZZ01103093.1-ighv |(4113, 4425)|2.95973242436|(0.988,0.974,0.999)|-1
-VLSQVQLQESG-PGLLKPSETLSLTCAISGGSI----SSSYHYWSWIRQAPGKGL---E
WIGYISY---SGST--NYNPSLKSRVTISTDTSKNQFSLK------LS-SVTAADTAVYY
CAR-------
>V215RF-AHZZ01103093.1-ighv |(19002, 19311)|2.98097252412|(0.999,1.000,0.983)|-1
-VLSQVQLQESG-PGLVKPSETLSLTCAVSGYSI----SS-GYYWGWIRQPPGKGL---E
WIGSIYSS--G-SN--YLNPSLKSRVTLSVDTSKNQFSLK------LS-SVTAADTAVYY
CAR-------
>V216RF-AHZZ01103094.1-ighv |(666, 977)|2.99899600001|(1.000,1.000,0.999)|-1
-VQCEVQLVESG-GGVVQPGGSLRLSCAASGFTF----DD--YAMGWVRQAPGKGL---E
WVSAISW--SGGST--GYADSVKGRFTISRDNAKNSLYLQ------MN-RLRAEDTALYY
CAKD------
>V218RF-AHZZ01103097.1-ighv |(667, 978)|2.99899600001|(1.000,1.000,0.999)|-1
-VQCDVQLVESG-GGLVKPGGSLRLSCVASGFTF----SS--YEMHWVRQAPGKGL---E
WVSGIST--SGGTT--YYADSVKGRFTISRDNAKNSLFLQ------MN-SLRAEDTAVYY
CAKE------
>V219RF-AHZZ01103097.1-ighv |(4629, 4936)|2.96552457073|(0.998,0.986,0.983)|-1
-VLSQVQLQESG-PGVVKPSETLSLTCAVSGYSI----SS-GYYWGWIRQPPGKGL---E
WIGSIYSS--G-SN--YLNPSLKSRVTLSVDTSKNQFSLK------LS-SVTAADTAVYY
CA--------
>V220RF-AHZZ01103258.1-ighv |(1265, 1574)|2.99596800026|(1.000,0.998,0.998)|-1
-VLSQVQLQESG-PGLVKPSETLSLTCAVSGGSI----SS--NYWNWIRQAPGKGL---E
WIGSIYSS--GSST--NYNPSLKNRVTISTDTSKNQFSLK------LS-SVTAADTAVYY
CAR-------
>V221RF-AHZZ01104243.1-igkv |(7682, 7981)|2.99798400013|(1.000,0.998,1.000)|-1
-TTGEIVLTQSPATLSLSPGERATLSCRASQSVS--------SSLAWYQQKSGQAP---R
LLIYG-------AS--SRATGIPDRFSGSG--SGTDFTLT------IS-ILEPEDVAVYY
CQQYYNWN--
>V222RF-AHZZ01105198.1-iglv |(1704, 2007)|2.99899600001|(1.000,0.999,1.000)|-1
-SWAQSALTQPR-SVSGSPGQSVTISCTGTSSDI---GGY--NYVSWYQQHPGKAP---K
LMIYD-------VS--KRPSGVSDRFSGSK--SGNTASLT------IS-GLQAEDEADYY
CSSYAGS---
>V224RF-AHZZ01105199.1-iglv |(5057, 5367)|2.99096400065|(0.996,0.996,0.999)|-1
-SWAQAALTQPP-SVSKSLGQSVTISCTGTSNDI---GGY--NAVSWYQQHPGTAP---R
LLIYE-------VS--NRPSGVSDRFSGSK--SGNTASLT------IS-GLQAEDEADYY
CGSYRSGST-
>V225RF-AHZZ01105199.1-iglv |(17460, 17763)|3.0|(1.000,1.000,1.000)|-1
-SAASYELTQPH-SVSVSPGQTARITCGGD--N----IGS--KYVQWYQQKPAQAP---V
LVIYA-------DS--ERPSGIPERFSGSK--SGNTATLT------IS-GVEAGDEADYY
CQVWDSSSDH
>V226RF-AHZZ01105200.1-iglv |(22027, 22330)|2.99174403277|(1.000,0.992,1.000)|-1
-SAASYELTQPG-SVSVSPRQTARITCGGD--N----IGS--KSVHWYQQKPGQAP---V
LVIYN-------DS--ERPSGIPERFSGSN--SGNTATLT------IS-GVEAGDEADYY
CQVWDSSSKY
>V228RF-AHZZ01105201.1-iglv |(54273, 54570)|2.98996000066|(0.998,0.995,0.997)|-1
-SVASYELTQPP-SVSVSPGQTARITCSGD--A----LPK--NYAYWYQQKPGQAP---V
LVIYK-------DS--ERPSGIPERFSSSS--SGTTVTLT------IS-GAQAEDEADYY
CYSGDGNS--
>V229RF-AHZZ01105201.1-iglv |(63444, 63747)|2.99899600001|(1.000,1.000,0.999)|-1
-SWAQSALTQPP-SVSGSPGQSVTISCTGTSSDV---GGY--NYVSWYQQHPGTAP---K
LMIYD-------VS--NRPSGVSDRFSGSK--SGNTASLT------IS-GLQAEDEADYY
CCSYTTS---
>V230RF-AHZZ01105201.1-iglv |(75648, 75951)|2.98880001921|(0.999,0.992,0.998)|-1
-SAASYELTQPP-SVSVSPGQTARITCGGD--N----IGS--EAVHWYQQKPPQAP---V
LVIYA-------DS--ERPSGIPERFSGSN--SGNTATLT------IS-GVEAGDEADYY
CQVWDISNDH
>V231RF-AHZZ01106331.1-igkv |(10056, 10356)|3.0|(1.000,1.000,1.000)|-1
-ARCDIQLTQSPSSLSASVGDRVTITCRASQGI------S--SYLAWYQQKPGKAP---K
LLIYD-------AS--NLQSGVPSRFSGSG--SGTEFTLT------IS-SLQPEDFAVYY
CQQRNSYP--
>V232RF-AHZZ01106331.1-igkv |(16128, 16428)|3.0|(1.000,1.000,1.000)|-1
-AKCDIQMTQSPSSLSASVGDRVTITCRASQGI------S--SYLAWYQQKPGKAP---K
PLIYY-------AS--NLESGVPSRFSGSG--SGTEFTLT------IS-SLQPEDFATYY
CQQYNSAP--
>V233RF-AHZZ01106331.1-igkv |(33100, 33400)|2.99593600205|(1.000,1.000,0.996)|-1
-ARCDIQMTQSPSSLSASAGDRVTITCRASQGI------S--TYLNWYQQKPGKAP---T
RLIYA-------AS--SLQSGVPSRFSGSG--SGTEFTLT------IS-SLQPEDFATYY
CLQYNSAP--
>V234RF-AHZZ01106331.1-igkv |(43583, 43883)|3.0|(1.000,1.000,1.000)|-1
-TTGETVMTQSPATLSLSPGERATLSCRASQSVG--------SSLAWYQQKPGQAP---R
LLVYY-------AS--SRATGIPDRFSGSG--SGTDFTLT------IS-SLEPEDVGVYY
CQKYNDWP--
>V235RF-AHZZ01107345.1-trbv |(266, 563)|2.9751523093|(0.998,0.984,0.994)|-1
--PIDSGITQTPKHLVIGMTNKKSLKCEQHMGH---------RAVYWYKQKAKKPP---E
IMFMYN-Y--ETL---SINESVPSRFSPECSK-SSLLHLH------LQ-ALQPEDSALYL
CASSQ-----
>V237RF-AHZZ01107346.1-trbv |(105930, 106243)|2.84609578103|(0.995,0.979,0.905)|-1
--SLDTAVSQTPKYLVTQTGKKESLKCEQNLGH---------DAMYWYKQDSKKLL---K
IMFSYN-N--KELI---INETVPNRISPDSPD-KAHLNLH------IK-SVELGDSAVYF
CASSQATALQ
>V239RF-AHZZ01107395.1-igkv |(1617, 1915)|2.96736078502|(0.999,0.982,0.988)|-1
-TTGEIVMTQSPATLSLSPGERATLSCRASQSVN--------SYLAWYQQKPGQAP---R
LLIYD-------AS--SRATGIPDRFSGSG--SGTDFTLT------IS-SLEPEDVAVYF
CLQSSNW---
>V240RF-AHZZ01107399.1-igkv |(425, 725)|2.99899600001|(1.000,0.999,1.000)|-1
-AKCDIQMTQSPPSLSASVGDRVTITCQASQGI------S--NWLAWYQQKPGEAP---K
LLIYA-------AS--TLQSGVPSRFSGSG--SGTEFTLT------IS-SLQPEDFATYY
CQQHNSYP--
>V241RF-AHZZ01108758.1-ighv |(6447, 6754)|2.99596000066|(1.000,0.999,0.997)|-1
-VLSQVQLQESG-PGVVKPSETLSLTCAVYGGSV----SG--SYWSWIRQAPGKGL---E
WIGEINGN--SGST--SYNPSLKSRVTISTDTSKNQFSLK------LS-SVTAADTAVYY
CA--------
>V242RF-AHZZ01110488.1-igkv |(1345, 1645)|2.99899200002|(0.999,1.000,1.000)|-1
-ARCDIQMTQSPSSLSASVGDKVTITCHASQSI------S--SWLAWYQQKPGKAP---K
LLIYK-------AS--SLQSGVPSRFSGSG--SGTDFTLT------IS-SLQPEDFATYY
CQQYDSNH--
>V243RF-AHZZ01111138.1-igkv |(1438, 1738)|3.0|(1.000,1.000,1.000)|-1
-ARCDIQMTQSPSSLSASVGDKVTITCHASQGI------S--SWLSWYQQKPGKAP---K
LLIYK-------AS--SLQSGVPSRFSGSG--SGTDFTLT------IS-SLQPEDFATYY
CQQYSSSP--
>V244RF-AHZZ01111138.1-igkv |(3529, 3815)|2.94562999772|(1.000,0.967,0.984)|-1
-----IVMTQSPATLSLSPGERATLSCRASQSVS--------SRLAWYQQKPGEAP---R
LLIYD-------AS--SRATGIPARFSGSG--SGTDFTLT------IS-SLEPEDVAVYF
CQQESNW---
>V245RF-AHZZ01111138.1-igkv |(14203, 14503)|3.0|(1.000,1.000,1.000)|-1
-ARCDIQMTQSPPSLSASVGDRVTITCQASQSI------S--NYLAWYQQKPGKAP---K
LLIYA-------AS--TLQSGVPSRFSGSG--SGTEFTLT------IS-SLQPEDFATYY
CQRHNSYP--
>V246RF-AHZZ01111367.1-igkv |(1438, 1738)|3.0|(1.000,1.000,1.000)|-1
-ARCDIQMTQSPSSLSASVGDKVTITCHASQGI------S--SWLSWYQQKPGKAP---K
LLIYK-------AS--SLQSGVPSRFSGSG--SGTDFTLT------IS-SLQPEDFATYY
CQQYSSSP--
>V247RF-AHZZ01111367.1-igkv |(3529, 3815)|2.94562999772|(1.000,0.967,0.984)|-1
-----IVMTQSPATLSLSPGERATLSCRASQSVS--------SRLAWYQQKPGEAP---R
LLIYD-------AS--SRATGIPARFSGSG--SGTDFTLT------IS-SLEPEDVAVYF
CQQESNW---
>V248RF-AHZZ01111367.1-igkv |(14330, 14630)|3.0|(1.000,1.000,1.000)|-1
-ARCDIQMTQSPPSLSASVGDRVTITCQASQGI------S--NYLAWYQQKPGKAP---K
LLIYA-------AS--TLQSGVASRFSGSG--SGTEFTLT------IS-SLQPEDFATYY
CQQHNSYP--
>V249RF-AHZZ01112481.1-ighv |(613, 919)|3.0|(1.000,1.000,1.000)|-1
-VLSQVQLQESG-PGVVKPSETLSLTCAVSGGSI----S--SSYWSWIRQPPGKGL---E
WIGYIYGG--G-ST--NYNPSLKSRVTMSADTSKNQLSLK------LS-SVTAADTAVYY
CAR-------
>V250RF-AHZZ01125719.1-ighv |(24239, 24554)|3.0|(1.000,1.000,1.000)|-1
-VQCEVQLVESG-GGLVQPGGSLRVSCAASGFTF----SN--HYMQWVRQAPGKGL---E
WVGFIRNKANGGTA--EYAASVKGRFTISRDDSKSIASLQ------MN-SLKTEDTAVYY
CAR-------
>V251RF-AHZZ01125719.1-ighv |(41713, 42022)|3.0|(1.000,1.000,1.000)|-1
-VQCEVQLAESG-GGLVQPGGSLRLSCAASGFTF----SS--YEMHWVRQAPGKGL---E
SVSVISG--DSSYT--HYADSVKGRFTISRDNAKNSLSLQ------MN-SLRAEDTAVYY
CAR-------
>V252RF-AHZZ01125719.1-ighv |(47992, 48299)|2.9700882474|(1.000,1.000,0.973)|-1
-AHAQVQLVQSG-PEVKQPGASVKVSCKASGYTF----TS--YGMNWVRQAHGQRL---E
WMGWINT--DSGNP--TYAQGFKERFTFSMDTSISTAYLQ------IS-SLKAEDTAVYY
CA--------
>V253RF-AHZZ01181503.1-ighv |(302, 609)|2.9700882474|(1.000,1.000,0.973)|-1
-AHAQVQLVQSG-PEVKQPGASVKVSCKASGYTF----TS--YGMNWVRQAHGQRL---E
WMGWINT--DSGNP--TYAQGFKERFTFSMDTSISTAYLQ------IS-SLKAEDTAVYY
CA--------
>V254RF-AHZZ01185532.1-igkv |(806, 1093)|2.99899200002|(0.999,1.000,1.000)|-1
-----TVVTQSPATLSLSPGERATISCRTSQSVG--------SRLAWYQQKPGQAP---R
LLIYG-------AS--NRATGIPDRFSGSG--SGTDFTLT------IS-SLKPEDAAVYY
CQQDNDWK--
>V255RF-AHZZ01189918.1-igkv |(12178, 12478)|3.0|(1.000,1.000,1.000)|-1
-ARCDIQMTQSPSSRSASVGDTVTITCQASQGI------S--DYLAWYQQKPGKAP---K
LLIYA-------AS--NLESGVPSRFSGSG--SGTDFTLT------IS-SLQPEDFATYY
CQQYDSDP--
>V256RF-AHZZ01189922.1-igkv |(4528, 4816)|3.0|(1.000,1.000,1.000)|-1
-----IVMTQSPATLSLSLGETATISCRTSQSVG--------SKLAWYQQKPGQAP---R
LLIYG-------AS--SRATGIPDRFSGSG--SGTDFTLT------IS-SLEPEDFAVYY
CQETSNLS--
>V257RF-AHZZ01189923.1-igkv |(14019, 14319)|2.99496000066|(0.997,0.998,1.000)|-1
-ARCDIQMTLSPSSLSASVGDRVTITCRASQDI------S--SYLNWYQQKPGKAP---K
LLIYY-------AT--SLESGVPSRFSGSG--SGTDFTLT------IS-SLQPEDFATYY
CQQFKSYP--
>V258RF-AHZZ01198550.1-iglv |(8130, 8433)|3.0|(1.000,1.000,1.000)|-1
-SWAQAALTQPH-SVSGSPGQSVTISCTGTSSDI---GGY--DRVSWYQQHPGKAP---K
LMIYE-------VS--KRPSGVSDRFSGSK--SGNTASLT------IS-GLQAEDEADYY
CSSYAGS---
>V259RF-AHZZ01198550.1-iglv |(32463, 32773)|2.96248712253|(0.996,0.971,0.998)|-1
-SWAQSALIQSP-SVSGSLGQSVTISCTGTSSDI---GRY--NYVSWYRQQPGTTT---K
LMMYN-------VN--TRPSGVSDRFSGSK--SGNTASLT------IS-GLQAEDEADYY
CSSYEASDT-
>V260RF-AHZZ01198551.1-iglv |(10418, 10728)|2.99594800078|(0.997,1.000,0.999)|-1
-SWAQSAPTQPP-SVSGSPGQSVTISCTGTSSDI---GYY--NAVSWYQQHPGTAP---K
LMIYR-------VS--NRPSGVSDRFSGSK--SGNTASLT------IS-GLQAEDEADYY
CSSYAGSDT-
>V261RF-AHZZ01198551.1-iglv |(33935, 34238)|2.99194800078|(0.999,0.996,0.997)|-1
-SAASYELTQPP-SVSVSPGQMARITCSGD--A----LPE--KYADWYQQKPGQSP---V
LIIYE-------DS--KWPSGIPERFSGSS--SGTVATLT------IS-GAQVEDEADYY
CYSTDSSGNH
>V262RF-AHZZ01198553.1-iglv |(13429, 13732)|2.8248467507|(0.996,0.992,0.885)|-1
-SVVSSELTQDP-AVSVALGQTVRITCQGD--S----LSS--YYASWYQQKPGQAP---V
LVIYG-------NN--NRPSGIPERFSVSW--SGNTGSLT------IT-GAQVEDEADYY
CGSWDSSGNH
>V263RF-AHZZ01198553.1-igkv |(31919, 32222)|2.68664512543|(0.913,0.856,0.932)|-1
-SWAQAALTQPP-SVSKSLGQSVTISCAGTSSGI---ASY--SDVSWYQQHPGTAP---R
LLIYS-------VS--NRPSGVSDRFSGFK--SGSTASLT------IS-GLQAEDEAIYY
CCSYRSG---
>V264RF-AHZZ01198553.1-iglv |(39757, 40060)|2.99393200206|(0.999,0.995,1.000)|-1
-SEASYELIQPP-SVSVSPGQTARITCSGD--A----LPD--YYAYWYQQKSGQAP---M
LVIYK-------DS--ERPSGIPERFSGSS--SGTTVTLT------IS-GVQAEDEADYY
CQSADSSGNH
>V265RF-AHZZ01198553.1-iglv |(56860, 57163)|2.99799600001|(0.999,0.999,1.000)|-1
-SATSYELTQPP-SVSAASGQTARITCGGD--S----IGS--KNVQWYQQKPAQAP---V
LVIYA-------DS--KRPSGIPERFSGSN--SGNTATLT------IS-GVEAGDEADYY
CQVWDSSSKH
>V266RF-AHZZ01198553.1-iglv |(68992, 69302)|2.99192000218|(0.998,1.000,0.994)|-1
-SWAQAALTQPP-SVSGSPGQSVTISCTGTSSDI---GGY--NYVSWYQQHPGKAP---K
LMIYE-------VS--KRPSGVSDRFSGSK--SGNTASLT------IS-GLQAEDEADYY
CGSYASSST-
>V0RF-JZKE01005121.1-trbv |(3942, 4254)|2.98699600001|(0.996,0.995,0.996)|1
--LVETKVTQTPRHLVKRTGEKVLLKCSQDMDH---------ERMFWYRQDPGLGL---R
LIYFSY-D--VDND---EKGDVSEGYSASRKK-KEYFPLV------LE-SASTNQTSVYL
CASRYPQRCT
>V4RF-JZKE01218258.1-igkv |(171021, 171321)|2.99798400013|(1.000,1.000,0.998)|1
-ARCDIQMTQSPSSLAASLGDTVTITCQASQGI------S--NYLSWYQQKPGQSP---K
ILIYG-------AS--NLETGVPSRFSGSG--SGTDFTLT------IS-SLQPEDFATYY
CLQSYNYP--
>V5RF-JZKE01218259.1-igkv |(864, 1179)|2.96440247224|(0.999,0.969,1.000)|1
-SSGEIVMTQTPLSLPVTLGEPASISCRSSQSLLHS-NGN--TYLSWYLQKPGQSP---Q
LLIYL-------GF--TRASGVPDRFSGSG--SGTDFTLK------IS-KVEAEDVGVYY
CMQTIQVP--
>V6RF-JZKE01218259.1-igkv |(11427, 11740)|2.91406097516|(0.971,0.957,0.988)|1
-SSGDIVMTQTPLSLSVTPGESASISCTASQNIQNT-KGN--TYLNWFLQKPGQPP---K
RLIYK-------IS--NRDSGVSDRFSGSG--SGTDFTLE------IS-RVEAEDVGVYY
CMQASYY---
>V7RF-JZKE01218269.1-igkv |(713, 1028)|2.92679088874|(0.996,0.943,0.999)|1
-SSGEIVMTQTPLSLPVTPGEPASISCSSSQSLLHS-NGN--TYLYWYLQKPGQSP---Q
LLIYR-------VS--NRLSGVPDRFSGSG--SGTDFTLK------IS-RVEAEDVGVYY
CMQALQFP--
>V9RF-JZKE01244686.1-ighv |(3631, 3937)|2.99796800026|(0.998,1.000,1.000)|1
-VQCEVQLVESG-GGLVQPGGSLTLSCVASGFTF----SS--YAMCWVRQAPGKGL---E
WVSAIGS--GG-GT--YYADAVKGQFTISRDNSKNTLSLQ------MK-SLQAEDTAMYY
CAR-------
>V10RF-JZKE01244690.1-ighv |(27, 336)|2.99385601037|(1.000,1.000,0.994)|1
-VQCEVQLVESG-GGLVQPGGSLRLSCAASGFTF----DD--YAMHWVRQAPGKGL---D
WVSVINW--NGDYI--NYADAVKGRFTISRDNSKNSLYLQ------MN-SLRAEDTAVYY
CAR-------
>V11RF-JZKE01244709.1-ighv |(12, 321)|3.0|(1.000,1.000,1.000)|1
-VQCEVQLVESG-GGLVQPGGSLRLSCAVSGFTV----SN--YYMSWVRQAPGKGL---E
WVSYIYS--DDGDT--NYADAVKGRFTTSTDNGKNMLYLQ------MN-SLRTEDTAVYY
CAR-------
>V12RF-JZKE01244710.1-ighv |(1079, 1388)|3.0|(1.000,1.000,1.000)|1
-AQCEVQLVESG-GGLVQPGGSLTLSCAASGFTF----SD--YYMSWVRQAPGKGL---E
WVSRISN--TGGST--WYADAVKGRFTISRDNSKNTLSLQ------MN-SLRAEDTAVYY
CAR-------
>V13RF-JZKE01244715.1-ighv |(308, 614)|2.99799200002|(1.000,0.999,0.999)|1
-VRCEVQLVESG-GGLVQPGGSLTLSCAASGFTF----SS--YAMHWVRQAPGKGL---E
WVSRINS--G-GST--SYADAVKGRFTISRDNSKNMLSLQ------MN-SLRSEDTAVYY
CTR-------
>V14RF-JZKE01249931.1-iglv |(10411, 10721)|2.66872974033|(0.974,0.956,0.825)|1
-SLSQPVLTQPP-SLSASPGASARLTCTLSSGTV---VGG--YHISWYQQKPGSRP---R
YLLRYH-S--DSNK--HQGSGIPSRFSGSKDASANAGILH------IS-GLQPNDEADYY
CLT-------
>V15RF-JZKE01249932.1-iglv |(5041, 5344)|2.88716819862|(0.956,0.968,0.964)|1
-SLSQPVLTQPP-SASASLGASAKLTCTLSSAH-----SG--YTIAWYQQQPGKAP---Q
YLMYVK-S--DGRH--SKGDGIPDHFSGSSSG--ADRYLT------IS-NIQPEDEADYI
CGADY-----
>V16RF-JZKE01249932.1-iglv |(7450, 7753)|2.88716819862|(0.956,0.968,0.964)|1
-SLSQPVLTQPP-SASASLGASAKLTCTLSSAH-----SG--YTIAWYQQQPGKAP---Q
YLMYVK-S--DGRH--SKGDGIPDHFSGSSSG--ADRYLT------IS-NIQPEDEADYI
CGADY-----
>V17RF-JZKE01249933.1-iglv |(3726, 4036)|2.8312268109|(1.000,0.969,0.903)|1
-SLSQPVLTQPP-SLSASPGASARLTCTLSSGFS---VGS--YAIYWYQQKPGSPP---R
YLLSYY-S--DSDK--HQGSGVPRRFSGSKDASANVGILH------IS-GLQPEDEADYY
CMV-------
>V19RF-JZKE01249944.1-iglv |(1831, 2141)|2.99280401921|(1.000,0.993,1.000)|1
-SLANVVLTQPS-SVSGSPGQKVTISCTRSSGNI---G-D--NYVHWYQQRPGSAP---T
TVIYA-------DD--KRPSGVPDRFSGSIDSSSNSASLT------IS-GLQSEDEADYY
CQSYGSSA--
>V22RF-JZKE01249955.1-iglv |(302, 602)|2.26764732968|(0.960,0.651,0.975)|1
--SVASQLTQVP-AASVALGQTARITCQED--G----IRR--FFTNWYQQKPGETP---V
LLIYD-------SS--KQPSGIPERFSGSK--SGTTATLT------IS-GAQAGDEADYY
CQSFDISSNY
>V23RF-JZKE01249956.1-igkv |(66, 357)|2.32455079806|(0.896,0.772,0.774)|1
--SMASQLTQEP-SVSVALGQTARMTCQGDSL------RS--YYASWYQQKPGQAP---V
LVIYS-------NS--NRPSGIPERFSGSK--SGTTATLT------IS-GAQAEDEADYY
CGSYTGS---
>V24RF-JZKE01249956.1-iglv |(5127, 5437)|2.93943912445|(0.971,0.996,0.975)|1
-SGAQSALTQPS-SVSGNPGQSVTISCAGTSSDV---GKY--NYVSWYQQHPGTAP---K
LLIYN-------VN--TRTSGIPDRFSGSK--SGNTASLT------IS-GLLAEDEADYH
CSSYRSGNA-
>V25RF-JZKE01249957.1-iglv |(3969, 4267)|2.97600040988|(0.999,0.994,0.984)|1
--SVASQLTQVP-AVSVALGQTARITCQGD--S----LSS--YYPNWYQQKPGQAP---V
LVIYG-------NS--NRPSGIPERFSSSD--SGTTATLT------IS-GAQAGDEADYY
CGSYAGSDT-
>V26RF-JZKE01249957.1-iglv |(9221, 9531)|2.89853971076|(0.965,0.998,0.942)|1
-SGAQSALTQPS-SVSGNPGQSVTISCAGTSSDI---GKY--NYVSWYQQHPGTAP---K
LLIYN-------VN--TRASGIPDRFSGSK--SGNTASLT------IS-GLLAEDEADYH
CSSYRSGNA-
>V28RF-JZKE01249958.1-iglv |(6051, 6351)|2.83465800141|(0.973,0.905,0.975)|1
--SVASQLTQVP-AASVALGQTARITCQED--G----IRS--FFTNWYQQKPGEAP---V
LLIYD-------SS--KQPSGIPERFSGSK--SGTTATLT------IS-GAQAGDEADYY
CQSFDISSNY
>V29RF-JZKE01249959.1-iglv |(447, 745)|2.96726023048|(0.995,0.982,0.991)|1
-SVASYELTQPP-SVSVSPGQTARITCGGN--N----IGN--KYAYWHQQKAGQAP---V
LIIYS-------DS--NRPSGIPERFSGSN--SGNTATLT------IS-GTQAGDEADYY
CQVWDGSN--
>V30RF-JZKE01255160.1-ighv |(7108, 7423)|2.99899200002|(0.999,1.000,1.000)|1
-VQCEVQLVESG-GGLVQPGGSLTLSCAASGFSF----SN--YWMHWVRQAPGKGL---E
WVSSIGN--D-GST--SYADAVKGRFTISRDNDKNTLSLR------MN-SLRAEDTAVYY
CARETV----
>V31RF-JZKE01296733.1-igkv |(5866, 6179)|2.9843881665|(1.000,0.997,0.988)|1
-SSGDIVMTQTPLSLSVTPGESASISCTASQSILHT-DGN--TYLNWLLQKPGQPP---K
RLIYK-------IS--NRDSGVSDRFSGSG--SGTDFTLE------IS-RVEAEDVGVYY
CMQASYY---
>V32RF-JZKE01097728.1-igkv |(2698, 3010)|2.99080001921|(0.999,0.992,1.000)|-1
-ACGDIVMTQSLRSLAVSPGERVTIDCKSSQSLL--SNNK--NYLAWHQQKPGQAP---K
LLIYW-------AS--TRASGVPDRFSGSG--SGTDFTLT------IS-SVQAEDVAVYY
CQQYHSTP--
>V33RF-JZKE01143868.1-trav |(15192, 15493)|2.95242016586|(0.988,0.989,0.976)|-1
-SSVAQTVTQSQPEMSVQEAGTVTLDCTYATSD-----SN--YYLFWYKQPPSRQM---I
LIIRQE-A--YKQ-----QNATENRFSVNFQKAAKSFSLE------IS-DSQLEDAAMYF
CAFM------
>V34RF-JZKE01143869.1-trav |(6274, 6564)|2.99089600501|(0.995,0.996,1.000)|-1
-VSSEDKVIQSPSSLAVHEGDSATLTCNYEVSY------F--QSLQWYKQEK-NAP---T
FLFTLT-S--SGI------EKKSGRLSSILDNKELLSTLN------IT-ATQTRDSAIYF
CAVE------
>V41RF-JZKE01143873.1-trdv |(6157, 6456)|2.98066005261|(0.990,0.999,0.992)|-1
-STVAQKVTQYQATTSMTEGQAVTLNCQYETSST----T---YFICWYKQLPSKEM---I
FLLRQG-S--TSQ-----NA-KDGRYSVNFRKEAKSINLT------IS-ALRLEDSAKYF
CALWD-----
>V43RF-JZKE01143874.1-trdv |(2471, 2770)|2.96457605748|(0.987,0.996,0.982)|-1
-STVAQKVTQAQTATTRTVGQAVTLNCQYEASWS----S---YYIYWYKQLPSNEM---I
FLLRQY-S--GDQ-----NA-KNGRYSINFQKEAKSIDLT------IS-ALRLEDSAKYF
CALWD-----
>V44RF-JZKE01143890.1-trav |(1103, 1400)|2.9969280013|(0.997,1.000,1.000)|-1
-RSNGDSVTQTEGTVTLPEGAPVILNCTYETTY-----SV--SYLFWYVQYLNQSP---Q
LLLKSS-T--ENQ------RGENRGFQANLVKSDKSFHLE------KS-SLRMSDSAVYY
CALS------
>V46RF-JZKE01143891.1-trav |(8677, 8980)|2.99196000066|(0.996,0.999,0.997)|-1
-PSMAQKVTQAQPEISVVEKESVTLDCVYETRD-----PT--YYLFWYKQPPSGEM---I
FLIRQD-S--FNE-----KNETKDRYFLNLQKSTSSISLT------IT-ASQLMDSAVYF
CALRE-----
>V47RF-JZKE01143893.1-trav |(6613, 6900)|2.98074002125|(0.990,0.997,0.994)|-1
--VNSQQGEENPQALSIQEGENATINCSYKSS-------I--SNLQWYRQDSGRGL---T
LLILIR-A--NKR------EEHHGRLTVTLNTSIKSSSLI------IT-ASCAADSATYF
CATD------
>V48RF-JZKE01143895.1-trav |(12286, 12579)|2.98356408064|(0.997,0.987,1.000)|-1
-VSGGENVGLHPPTLNVQEGDTSVINCTYSNSA------S--NYFPWYKQELGKGP---Q
FIIDIR-S--NMD------NKQEQRFTVLLNKTAKHLSLH------IA-GTQAGDSAVYF
CAES------
>V49RF-JZKE01143895.1-trav |(15624, 15933)|3.0|(1.000,1.000,1.000)|-1
-AGIAQKVTQSQPAMSVQEKEAVTLDCTYDTSTS---VTS--YTLFWYKQPSSGEM---I
LLIRQD-S--YNQ-----QNATEGRYSLNFQKASKSIKLV------IS-ASQVGDSAIYF
CALSE-----
>V50RF-JZKE01143895.1-trav |(22481, 22772)|2.99698000014|(0.998,1.000,0.999)|-1
VRSQQKEVEQTPESLSVSEGATASLNCTYSNTA------S--QYFTWYRQYSGKGP---E
LLVSIY-S--NGD------K-EEERFTVHLNMASRYVSLL------IR-DSQPSDSATYL
CAV-------
>V52RF-JZKE01143896.1-trav |(1244, 1537)|2.98498000014|(0.994,0.995,0.996)|-1
-VRGGENMGLHPPNLSVQEGDTSVINCTYSNSN------S--DYFCWYKQEPGKGP---Q
FIMDIR-S--NKD------KKQEGRFTILLNKMAKHLSLH------IA-GTQAGDSAAYL
CAES------
>V53RF-JZKE01143896.1-trav |(8327, 8630)|2.99180001921|(1.000,0.993,0.999)|-1
-SGIAQKVTQVQPAMLVQEKEAVTLDCTYDTSD-----SR--YTLFWYKQPSSGEM---L
LLIRQD-S--YNQ-----QNATEGRYSLNFQKANKSIKLV------IS-ASQVGDSAIYF
CALME-----
>V54RF-JZKE01143896.1-trav |(15626, 15938)|2.98332422844|(0.999,0.999,0.986)|-1
VRSQQKEVEQTPESLSVSEGATASLNCTYSNTA------S--QYFAWYRQYSGKGP---E
LPVSIY-S--TGD------KEEEGRFTVQLNKGSRYVSLL------IR-DSQPSDSATYL
CAVSTQCSP-
>V55RF-JZKE01143902.1-trav |(453, 744)|2.99899600001|(1.000,1.000,0.999)|-1
VRSQQKEVEQTPESLSVSEGATASLNCTYSNTA------S--QYFAWYRQYSGKGP---E
LLVFIY-S--TGD------K-EEGRFTVQLNKASRYVSLL------IR-DSQPSDSATYL
CAV-------
>V56RF-JZKE01143903.1-trav |(641, 935)|2.99599600001|(0.999,0.999,0.998)|-1
-RTHGDSVTQMEGQVTLSEEAFLTINCTYTATG-----Y---PALFWYVQYPGEGP---Q
LLLKAT-K--AND------KGINKGFEATYKRETTSFHLE------KA-SVHESDSAVYY
CALS------
>V57RF-JZKE01143910.1-trav |(6899, 7192)|2.97450008499|(0.990,0.985,1.000)|-1
-VSGKNQVEQGPQSLIIPEGENCTLQCNYTVSP------F--NNLRWYKQETGRGP---V
SLIIMN-Y--SKS------KESNGRYTATLDASAKQSSLH------IT-ASQLSDSASYI
CVAS------
>V58RF-JZKE01143910.1-trav |(50038, 50331)|2.93883447505|(0.993,0.954,0.998)|-1
-VSGGENVGLHPPTLNVQEGDTSVINCTYSDSA------S--IYFPWYKQELGKGP---Q
FITDIR-S--NMD------NKQEQRFTVLLNKTAKHLSLH------IA-GTQAGDSAVYF
CAES------
>V59RF-JZKE01143910.1-trav |(57835, 58138)|2.99498000014|(0.998,0.997,1.000)|-1
-AGVAQKVTQSQPAMLVQEKEAVTLDCTYDTSD-----SS--YGLFWYKQPSSGEM---L
LLIRQD-S--YNQ-----QNATEGRYSLNFQKARKSIHLV------IS-ALQLGDSAIYF
CALSE-----
>V60RF-JZKE01143913.1-trav |(1691, 1985)|2.87585799131|(0.955,0.934,0.995)|-1
-RTYGNTVTQGEGQVTLSEGAFLTINCTYTSTG-----Y---PTLFWYVQYPGEGP---Q
LFLKAT-Q--AND------KAINKGFEATYKRETTSFHLE------KA-SVHESDSAMYY
CVLS------
>V61RF-JZKE01143915.1-trav |(12659, 12952)|2.98879201242|(0.993,0.997,0.999)|-1
-VSRGENVEQRPSTLHVQEGDTSVINCTYSDSA------S--SYFPWYKQELGKGP---Q
LFIDIR-S--NLD------KKQDQRITLLLNRMTKHLSLH------IA-ATQPGDSAVYF
CVAS------
>V62RF-JZKE01143915.1-trdv |(19560, 19869)|2.76619314055|(0.937,0.924,0.909)|-1
-SSITQKVTQDQPAMLVQEKEAVTLDCTYDTSTS---VNN--FALFWYKQPSSGEM---L
LLIRQD-S--YNQ-----QNATEGRYSLNFQKAKKSIHLL------IS-ASQLEDSAMYF
CALKK-----
>V65RF-JZKE01143916.1-trav |(38882, 39172)|2.98999600001|(0.997,0.997,0.996)|-1
-ISRGEKVEQS-PFLSVQEGDSSVINCTYTEST------S--TYFYWYKQGPGEGP---Q
LLMTIL-S--SMD------KKQEQRLSVLLNKREKHLSLH------IS-DTQPGDSAVYF
CAVS------
>V66RF-JZKE01143916.1-trav |(40477, 40765)|2.97966002957|(0.989,0.995,0.996)|-1
--VNSQKIEQNPRALNIHEGETAAVTCNYTSYS------P--AFLQWYRQDPERGL---V
FLLLIR-E--NEG------EKQEGRLKVTFDTTHKQSSFY------IT-DSQPADSATYL
CAA-------
>V67RF-JZKE01143916.1-trav |(59581, 59872)|2.98996000066|(0.996,0.999,0.995)|-1
--SHGDSVTQTDGQMLLTEGDSLIVNCSYETRQ-----Y---PALFWYVQYPGEGL---Q
LLLKAA-K--AND------KGINKGFEATYNRETTSFHLE------KA-SVHVSDSAVYY
CALS------
>V69RF-JZKE01196378.1-trbv |(847, 1154)|2.96209640489|(0.993,0.992,0.978)|-1
--HTDAGITQNPRFRVTETGKQVTLRCHQTDKY---------DYMYWYRQDLGRGL---R
LIHYSY-G--VQRT---DKGEFSEGYNVSRSD-MEDFPLT------LE-SATPSQTSVYF
CAISDSTA--
>V70RF-JZKE01235368.1-ighv |(1130, 1439)|3.0|(1.000,1.000,1.000)|-1
-VQCQVQLVESG-GGLVQPGGSLTLSCAASGFTF----SS--YWMYWVRQAPGKGL---E
WVSSINY--GGGST--YYADGVKGRFTISRDNSKNTLSLQ------MN-SLRAEDTAVYY
CAK-------
>V71RF-JZKE01238797.1-iglv |(185, 497)|2.99696400065|(1.000,1.000,0.997)|-1
-SWAQSALTQPP-SVSGAPGQTVTISCTGSSSNI---GGG--YYASWYQQLPGSAP---K
LLIYY-------DS--DRPSGIPARFSGSK--SGSSASLT------IT-GLQAEDEADYY
CAAWDTSLSG
>V72RF-JZKE01238797.1-iglv |(4422, 4732)|2.99696400065|(1.000,0.997,1.000)|-1
-SLANFVLTQPS-SVSGSPGQKVTISCTRSSGNI---G-D--NYVSWYQQRPGSAP---T
TVIYD-------DN--QRPSGVPDRFSGSIDSSSNSASLT------IS-GLQSEDEADYY
CQSYDSSA--
>V73RF-JZKE01238799.1-iglv |(2255, 2565)|3.0|(1.000,1.000,1.000)|-1
-SLANFVLTQPS-SVSGSPGQKVTISCTRSSGNI---G-S--YYVHWYQQRPGSAP---T
TVIYN-------DN--QRPSGVPDRFSGSIDSSSNSASLT------IS-GLQSEDEADYY
CQSYDSSA--
>V74RF-JZKE01238800.1-iglv |(606, 916)|2.93349471963|(0.999,0.969,0.972)|-1
-SLSQPVLTQPP-SLSASPGASARLTCTLSSGFS---VGS--YAIYWYQQKPGSPP---R
YLLSYY-S--DSSK--HQGSGVPSRFSGSKDASANAGILH------IS-GLQPEDEADYY
CMA-------
>V76RF-JZKE01255181.1-ighv |(445, 754)|2.99899600001|(1.000,1.000,0.999)|-1
-VQCEVQLVESG-GGLVQPGGSLTLSCAASGFTF----SD--YYMHWVRQAPGKGL---E
WVSYISS--SGGST--YYADAVKGRFTISRDNSKNTLSLQ------MN-SLRAEDTAVYY
CVR-------
>V77RF-JZKE01255182.1-ighv |(1026, 1335)|3.0|(1.000,1.000,1.000)|-1
-VQCEVQLVESG-GGLVQPGGSLTFSCAASGFTF----SS--YNMHWVRQAPGKGL---E
WVSYISN-T-GGST--YYAEAVKGRFTISRDNSKNTLSLQ------MN-SLRAEDTAVYY
CAG-------
>V78RF-JZKE01278248.1-ighv |(4833, 5139)|3.0|(1.000,1.000,1.000)|-1
-VQCEVQLVESG-GGLIQPGGSLTLSCAASGFTI----SS--YYMDWVRQASGKGL---E
WVSAISS---GGST--YYADAVKGRFTISRDNSKNTLSLQ------MN-SLRAEDTAVYY
CAR-------
>V79RF-JZKE01278249.1-ighv |(3382, 3691)|2.91740247224|(0.964,0.963,0.994)|-1
-IQCEVHLVESG-GGLVQPGASLKLSCAASGFSF----SS--YGMNWVRQAPGKGL---E
WVSHIDY--DAGST--YYADAVKGRFTISRDNSKNTLSLQ------MN-SLRAEDTAMYY
CAR-------
>V80RF-JZKE01278253.1-ighv |(3391, 3700)|2.9889000027|(0.996,1.000,0.993)|-1
-VQCEVQLVESG-GGLVQPGGSLRLSCAASGFTF----SD--YYMHWVRQAPGKGL---E
WVSYIYS--DGGDT--NHADAVKGRFTTSTDNGKNMLYLQ------MN-SLRAEDTAVYY
CAR-------
>V81RF-JZKE01278255.1-ighv |(2535, 2844)|3.0|(1.000,1.000,1.000)|-1
-VQCEVQLVESG-GGLVQPGGSLTLSCAASGFTF----SS--YWMYWVRQAPGKGL---E
WVSSINS--GGGST--YYADAVKGRFTISRDNSKNTLSLQ------MN-SLRAEDTAVYY
CAK-------
>V82RF-JZKE01278267.1-ighv |(5092, 5401)|3.0|(1.000,1.000,1.000)|-1
-VQCEVQLVESG-GGLVQPGGSLRLSCAASGFTF----SS--YGMNWARQAPGKGL---E
WVSTINY--DGSST--SYADAVKGRFTISRDNSKNTIYLQ------MN-SLRAEDTAVYY
CAK-------
>V83RF-JZKE01278268.1-ighv |(3308, 3617)|3.0|(1.000,1.000,1.000)|-1
-VQCEVQLVESG-GGLVQPGGSLTLSCVASGFTF----SS--YYMHWVRQAPGKGL---E
WVSYINT--AGGST--SYADAVKGRFTISRDNSKNTLSLQ------MN-SLRAEDTAVYY
CAR-------
>V84RF-JZKE01278271.1-ighv |(48, 354)|3.0|(1.000,1.000,1.000)|-1
-VQCEVQLVESG-GGLAQPGGSLTLSCAASGFTF----SN--YGMHWVRQAPGKGL---E
WVSAISS---GGST--YYADAVKGRFTISRDNSKNTLSLQ------MN-SLRTEDTAVYY
CAK-------
>V85RF-JZKE01278271.1-ighv |(7402, 7711)|3.0|(1.000,1.000,1.000)|-1
-VQCEVQLVESG-GGLVQPGGSLTLSCAASGFTF----SS--YDMSWVRQAPGKGL---E
WVAVIWA--DGSKQ--YYADSVKGRFTISRDNGKNMLYLQ------MN-SLRAEDTAMYY
CAS-------
>V86RF-JZKE01278273.1-ighv |(24, 333)|3.0|(1.000,1.000,1.000)|-1
-VQCEVQLVESG-GGLVQPGGSLTLSCAASGFTF----SS--YVMYWFRQAPGKGL---E
WVSRISS--SGGST--SYADALKGRFTISRDNSKNTLSLQ------MN-SLRAEDTAVYY
CAK-------
>V87RF-JZKE01278276.1-ighv |(456, 765)|3.0|(1.000,1.000,1.000)|-1
-VQCEVQLVESG-GGLVQPGGSLKLSCAASGFTF----SS--YGMNWVRQAPGKGL---E
WISHINY--DAGST--YYADAVKGRFTISRDNSKNTLSLQ------MN-SLKAEDTAVYY
CAK-------
>V88RF-JZKE01278277.1-ighv |(1432, 1741)|2.99899600001|(1.000,0.999,1.000)|-1
-VQCEVQLVESG-GGLVQPGGSLTLSCAVSGFTV----SS--YGMNWVRQAPGKGL---E
WVSYIYS--DGGST--NYADAVKGRFTTSTDKSKNTLSLQ------MN-SLRAEDTAVYY
CAR-------
>V89RF-JZKE01278602.1-ighv |(13, 322)|2.99899200002|(0.999,1.000,1.000)|-1
-VQCEVQLVESG-GGLVQPGGSLTLSCAASGFTF----SS--YWMSWVRQAPGKGL---E
WVSTISH--TGGST--YYADALKGRFTISRDNSKNTLSLQ------MN-SLRTEDTAVYY
CAR-------
>V90RF-JZKE01278602.1-ighv |(4600, 4909)|2.997|(0.999,0.999,0.999)|-1
-VQCEVQLVESG-GGLVQPGGSLRLSCVASGFTF----SS--YVMYWFRQSPGKGL---E
WVSRISS--SGGST--SYADALKGRITISRDNSKNTLSLQ------MN-SLRAEDTAVYY
CAI-------
>V91RF-JZKE01278605.1-ighv |(401, 710)|3.0|(1.000,1.000,1.000)|-1
-VQCEVQLVESG-GGLVQPGGSLTLSCAASGFTF----SD--YYMSWVRQAPGKGL---E
WVSRISS--DGTST--YYADAVKGRFTISRDNSKNTLSLQ------MN-SLQAEDTAVYY
CAR-------
>V92RF-JZKE01278607.1-ighv |(3705, 4014)|3.0|(1.000,1.000,1.000)|-1
-VQCEVQLVESG-GGLVQPGGSLTLSCAASGFSF----SS--YWMHWVRQAPGKGL---E
WVSYINS--AGGST--YYADAVKGRFTISRDNSKNTLSLQ------MN-SLRAEDTAVYY
CAR-------
>V93RF-JZKE01278609.1-ighv |(657, 966)|3.0|(1.000,1.000,1.000)|-1
-VQCEVQLVESG-GGLIQPGGSLTLSCAASGFSF----SS--YRMNWVRQAPGKGL---E
WISYISS--GGGST--YYADAVKGRFTISRDNSKNTLSLQ------MN-SLRAEDTAVYY
CAR-------
>V94RF-JZKE01278610.1-ighv |(3774, 4083)|3.0|(1.000,1.000,1.000)|-1
-VQCEVQLVESG-GGLVQPGGSLTLSCAASGFSF----SS--YDMSWVRQAPGKGL---E
WVSYINY--GGGST--SYADAVKGRFTISRDNSKNTLSLQ------MN-SLRADDTAVYY
CAS-------
>V95RF-JZKE01278610.1-ighv |(12525, 12834)|2.99798400013|(1.000,0.998,1.000)|-1
-VHCEVQLVESG-GGLVQPGGSLTLSCAASGFTV----SS--YCMSWVRQAPGKGL---E
WVSYIYS--DGGSR--NYADAVKGRFTTSTDNGKNTLYLQ------MN-SLRAEDTALYY
CAR-------
>V96RF-JZKE01278611.1-ighv |(583, 892)|2.99899600001|(1.000,1.000,0.999)|-1
-VQCEVQLVESG-GGLVQPGGSLRLSCVASGFTF----SD--YYMSWVRQAPGKGL---E
WVLYIYS--DDGDT--SYADAVKGRFTISTDNGKNMLYLQ------MN-SLRAEDTAVYY
CAR-------
>V97RF-JZKE01278611.1-ighv |(6883, 7192)|3.0|(1.000,1.000,1.000)|-1
-VQCEVQLVESG-GGLVQPGGSLKLSCAASGFTF----SS--YGMNWVRQTPGKGL---E
WISYINS--AGGST--SYADAVKGRFTISRDNSKNTLSLQ------MN-SLRAEDTAVYY
CAR-------
>V98RF-JZKE01278614.1-ighv |(2171, 2477)|3.0|(1.000,1.000,1.000)|-1
-VQCEVQLVESG-GGLVQPGGSLTLSCAVSGFTV----SS--YDMSWIRQASGKGL---E
WVSYISY---GGST--YYADAVKGRFTISRDNGKNTLSLQ------MN-SLRTEDTAVYY
CAR-------
>V99RF-JZKE01294660.1-trbv |(1696, 1993)|2.87906698619|(0.936,0.974,0.984)|-1
--PVEAQVTQTPRNRITETGKNVTVTCSQNMNH---------EYMSWYRQDPGLGL---K
LIYYSA-K--VEFV---TKGDAPDGYTASRRE-KPSFSLN------VE-STRTSQTALYL
CASSL-----
>V101RF-JZKE01294668.1-trbv |(161, 463)|2.99180001921|(1.000,0.999,0.993)|-1
--HTDAGITQNPRFRVTETGKQVTLRCHQTDKH---------DYMYWYRQDLGHGL---R
LIHYSI-G--AGNT---EKGQFSDGYSVSRSN-EQNFSLT------LE-SATPSQTSVYF
CASSDST---
>V103RF-JZKE01294668.1-trbv |(32591, 32891)|2.76024599033|(0.942,0.935,0.893)|-1
--SSGEEVTQTPGHLLKGKGQKVKMYCVPIKGH---------RYVFWYQQILGKEF---K
FLFSFQ-D--KEIF--EETEMLKQRFSAECPQ-NLPCSLE------IQ-TAELQDSAVYL
CASSE-----
>V105RF-JZKE01294669.1-trbv |(2779, 3079)|2.90118061787|(0.948,0.985,0.977)|-1
--HMGAGVSQSPRHKITMRGQNVTLRCDPISGY---------TFLFWYQQTLGQGP---Q
LLIYFQ-D--KDVV--DKSKLTGDRISAERPE-GSFSRLK------IQ-PAEQGDSAVYL
CASSL-----
>V107RF-JZKE01294669.1-trbv |(21670, 21960)|2.98278801933|(0.996,0.989,0.998)|-1
----DAGVIQSPRHLIKGKQETTILKCYPLSGH---------DTVYWYQQAPGQGL---Q
FLISYY-E--KMQR---EKGNIPQRFSGQQFA-DYHSELN------LS-SLEPGDSALYL
CASSL-----
>V108RF-JZKE01294672.1-trbv |(4950, 5250)|2.84300135931|(0.945,0.935,0.965)|-1
--HTGAGVSQSPRHKVTERGQNVSLRCDPISGH---------VSLFWYRQTPGQGL---Q
LLIYFQ-G--ADAT--DKSGLPSDRISAERPE-GSFSTLK------IQ-PAEQGDSAVYL
CASSL-----
>V110RF-JZKE01294690.1-trbv |(9942, 10239)|2.98698400013|(0.995,0.997,0.995)|-1
--PLDTAVFQTPKYLVSQMGNNVSLKCKQTLGH---------NTMYWYKQDSEKLL---K
IMFAYN-N--KELI---LNETVSNRFSPASPD-KAHLNLH------IE-SPEPDDSAVYL
CASSY-----
>V111RF-JZKE01294692.1-trbv |(174, 471)|3.0|(1.000,1.000,1.000)|-1
--PVDTGITQTPRHLVMGMTDKKSLKCEQNLGH---------DAMYWYKQSAKKPP---E
LMFYYN-Y--QEL---RENLTVSSRFSPECPD-SSHLYLH------LD-ALQPDDSAMYL
CASSQ-----
>V112RF-JZKE01294699.1-trbv |(3116, 3413)|2.85082119202|(0.940,0.957,0.956)|-1
--PMDTAVFQTPKYLLTETGNNVSLKCEQTLGN---------DAMYWYKQDSEKLL---K
IMFTYN-N--KELI---LNETVSNRFSPGSPD-KAHLNLH------IE-SPEAGDSAVYL
CASSY-----
>V113RF-JZKE01294700.1-trbv |(9965, 10265)|2.80256985094|(0.937,0.906,0.967)|-1
--HTEPGVIQTPTYQVIEKGQEVILRCDPISGH---------LYFYWYQQIWGQKV---E
FLVSFY-N--DNIS--EKSKIFKDRFSLERPR-GSYLALK------IQ-STEPEDSATYL
CASSP-----
>V0RF-AACZ03015560.1-igkv |(51593, 51911)|2.91861812739|(0.996,0.938,0.998)|1
-AYGDIVMTQSPDSLAVSLGGRATINCKSSQSILYSSNNK--NYLAWYQQKPGQPP---K
LLIYW-------AS--TRQSGVPDRFSGSG--SGTDFTLT------IS-SLQAEDVAVYY
CQQHYSAP--
>V1RF-AACZ03015560.1-igkv |(63266, 63554)|2.94836527997|(0.991,0.971,0.988)|1
-----TTLTQSPAFVSATPGDKVTISCKASQDI------D--DDMNWYQQKPGEAA---I
FIIQE-------AT--TLVSGIPPRFSGSG--YGTDFTLT------IN-NIESEDAAYYF
CLQDDNFP--
>V2RF-AACZ03050973.1-trgv |(700, 1013)|2.82237486023|(0.998,0.993,0.883)|1
-SQKSSNLEGRMKSVTRPTGSSAEITCDLIVI------NA--VYIHWYLHQEGKSP---Q
RLLYYD-V--SNSRDVLESGLSLGKYYTHT-PRRWSWILR------LQ-NLIENDSGVYY
CATWD-----
>V4RF-AACZ03053974.1-trbv |(14398, 14698)|2.99174403277|(1.000,1.000,0.992)|1
--LTEPEVTQTPSHQVTQMGQEVILRCVPISNH---------LYFYWYRQILGQKV---E
FLVSFY-N--NKIS--EKSEIFDDQFSVERPD-GSNFTLK------IR-STKLEDSAMYF
CASSE-----
>V5RF-AACZ03053974.1-trbv |(26630, 26943)|2.60986919643|(0.962,1.000,0.779)|1
--PIDTEVTQTPKHLVMGMTNKKSLKCEQHMGH---------RAMYWYKQKAKKPP---E
LMFVYS-Y--KKL---SINESVPSRFSPECPN-SSLLNLH------LH-ALQPEDLALYL
CASSQDTALQ
>V6RF-AACZ03053974.1-trbv |(34490, 34786)|3.0|(1.000,1.000,1.000)|1
--PVEAGVTQTPRYLIKARGQQVTLSCSPISGH---------RSVSWYQQTPGQGL---Q
FLFEYF-S--ETQR---NKGNFPGRFSGRQFS-NSRSEMN------VS-TLELGDSALYL
CASSL-----
>V7RF-AACZ03053974.1-trbv |(41734, 42031)|3.0|(1.000,1.000,1.000)|1
--PVNAGVTQTPKFQVLKTGQSMTLQCAQDMNH---------NSMYWYRQDPGMGL---R
LIYYSV-G--EGTT---DKGEVPDGYNVSRLN-KREFSLR------LE-SAAPSQTSVYF
CASSE-----
>V8RF-AACZ03053975.1-trbv |(1894, 2207)|2.96265347361|(1.000,1.000,0.967)|1
--PMEMGVTQTPRHLVMGMTNKKSLKCEQHLGH---------NAMYWYKQSAKKPL---E
LMFVYN-F--KEQT---ENNSVPSRFSPECPN-SSHLFLH------LH-ALQPEDSALYL
CASSQDTALQ
>V9RF-AACZ03053976.1-trbv |(3094, 3391)|2.9969280013|(0.997,1.000,1.000)|1
--PVNAGVTQSPKFRVLKTGQSMTLQCAQDMNH---------NYMYWYQQDPGMGL---R
LIHYSA-G--EGTT---AKGEVPDGYNVSRLN-TQNFLLR------LE-SAAPSQTSVYF
CATSE-----
>V10RF-AACZ03053977.1-trbv |(2980, 3277)|3.0|(1.000,1.000,1.000)|1
--PLDTAVSQTPKYLVTQMGKKESLKCEQNLGH---------NAMYWYKQDSKKFL---K
TMFIYS-N--KEPI---LNETVPNRFSPDSPD-KAHLNLH------IN-SLELGDSAVYF
CASSQ-----
>V11RF-AACZ03053977.1-trbv |(6432, 6729)|3.0|(1.000,1.000,1.000)|1
--PMEMGVTQTPRHLVMGMTNKKSLKCEQHLGH---------NAMYWYKQSAKKPL---E
LMFVYS-L--EERV---ENNSVPSRFSPECPN-SSHLFLH------LH-TLQPEDSALYL
CASSQ-----
>V12RF-AACZ03053977.1-trbv |(14911, 15208)|2.99899600001|(1.000,0.999,1.000)|1
--PVNAGVTQTPKFRVLKTGQSMSLLCAQDMNH---------EYMYWYRQDPGMGL---R
LIHYSV-G--EGTT---AEGEVPDGYNVSRLK-KQNFLLG------LE-SAAPSQTSVYF
CASSY-----
>V13RF-AACZ03053979.1-trbv |(398, 698)|2.99798400013|(1.000,1.000,0.998)|1
--HTGAGVSQSPSNKVTEKGKDVELRCDPISGH---------TALYWYRQSLGQGL---E
FLIYFQ-G--NSAP--DKSGLPSDRFSAERTG-GSVSTLT------IQ-RTQQEDSAVYL
CASSL-----
>V14RF-AACZ03053981.1-trbv |(4476, 4773)|3.0|(1.000,1.000,1.000)|1
--PVIAGITQAPTSQILAAGRSMTLRCTQDMRH---------NAMYWYRQDLGLGL---R
LIHYSN-T--AGTT---GKGEVPDGYSVSRAN-TDDFPLT------LA-SAVPSQTSVYF
CASSD-----
>V15RF-AACZ03053981.1-trbv |(8075, 8375)|2.99696400065|(1.000,1.000,0.997)|1
--HTGAGVSQTPSNKVTEKGKDVELRCDPISGH---------AALYWYRQSLGQGP---E
FLIYFQ-G--TGAA--DDSGLPNDRFFAVRPE-GSVSTLK------IQ-RTEQGDSAVYL
CASSL-----
>V16RF-AACZ03053981.1-trbv |(12907, 13203)|2.82677464153|(0.979,0.933,0.932)|1
--PVEAGVTQSPTHLIKTRGQQVTLRCSPISGH---------SSVSWYQQALGQGH---Q
FISRYA-N--ELRR---SEGNFPNRFSGRQFH-DYCSEMN------VS-ALELGDSALYL
CARSL-----
>V17RF-AACZ03053981.1-trbv |(15649, 15945)|2.99598000014|(0.999,0.997,1.000)|1
--PVDSGVTQTPKHLITATGQQVTLRCSPRSGD---------LSVYWYQQSLDQGL---Q
FLIQYY-N--GEES---AKGNILERFSAQQFP-DLHSELN------LS-SLELGDSALYF
CASSV-----
>V19RF-AACZ03053981.1-trbv |(31375, 31675)|2.99294800078|(0.998,1.000,0.995)|1
--LSEAEVAQSPRYKITEKSQAVAFWCDPISGH---------ATLYWYRQILGQGP---E
LLVQFQ-D--ESVV--DDSQLPKDRFSAERLK-GVDSILK------IQ-PAELGDSAMYL
CASSL-----
>V20RF-AACZ03053983.1-trbv |(4545, 4845)|2.97541612211|(0.994,0.999,0.983)|1
--LTEAGVAQSPRYKIIEKRQSVAFWCNPISGH---------ATLYWYQQILGQGP---K
LLIQFQ-N--NGVV--DDSQLPKDRFSAERLK-GVDSTLK------IQ-PAKLEDSAMYL
CASSL-----
>V21RF-AACZ03053983.1-trbv |(21546, 21843)|2.994900005|(1.000,1.000,0.995)|1
--PVNAGVTQTPKFQVLKTGQSMTLQCAQDMNH---------KYMYWYRQDPGMGL---R
LIHYSV-G--AGIT---DKGEVPNGYNVSRSN-TEDFPLS------LV-SAAPSQTSVYF
CASSY-----
>V22RF-AACZ03053983.1-trbv |(25762, 26062)|3.0|(1.000,1.000,1.000)|1
--HTGAGVSQSPRYKVAKRGRDVALRCDSISGH---------VTLYWYRQTLGQGS---E
VLTYFR-S--DAQR--DKSGRPSGRFSAERPE-RSVSTLK------IQ-RTEQGDSAVYL
CASSL-----
>V23RF-AACZ03053983.1-trbv |(33686, 33982)|3.0|(1.000,1.000,1.000)|1
--PVDAGVTQSPTHLIKTRGQQVTLRCSPQSGH---------NTVSWYQQALGQGP---Q
FIFQYY-R--EEEN---GRGNFSPRFSGRQFP-NYSSELN------VN-ALELDDSALYL
CASSL-----
>V24RF-AACZ03053983.1-trbv |(40132, 40429)|2.99596000066|(1.000,0.999,0.997)|1
--PVNAGVTQTPKFRILKIGQSMTLQCAQDMNH---------NYMYWYRQDPGMGL---K
LIYYSV-G--AGIT---DKGEVPNGYNVSRST-TEDFPLR------LE-SAAPSLTSVYF
CASSY-----
>V25RF-AACZ03053984.1-trbv |(12230, 12526)|2.99392000218|(0.996,1.000,0.998)|1
--PVDAGVTQSPTHLIKTRGQQVTLRCSPISGH---------TSVSWYQQALGQGP---Q
FIFQYY-E--KEER---GRGNFPDRFSACQFP-NYSSELN------VN-ALLLGDSALYL
CASSL-----
>V26RF-AACZ03053986.1-trbv |(8, 308)|2.99899200002|(0.999,1.000,1.000)|1
--HTGAGVSQSPRYKVTKRGQDVTLRCDPISGH---------VALYWYRQALGQGP---E
FLTYFN-Y--EAQP--DKSGLPNDRFSAERPE-GSNSTLT------IQ-RTEQRDSAMYL
CASSL-----
>V27RF-AACZ03053987.1-trbv |(5059, 5356)|2.97073242436|(0.999,0.988,0.985)|1
--PMNAGVTQTPKFHILKTGQSMTLQCAQDMNH---------GYMSWYRQDPGMGL---R
LIYYSA-A--AGTT---DKGEVPNGYNVSRLN-TEDFPLR------LV-SAAPSQTSVYF
CASSY-----
>V28RF-AACZ03053988.1-trbv |(2703, 3003)|2.99798400013|(1.000,1.000,0.998)|1
--HTGAGVSQSPRYKVTKRGQDVTLRCDPISSH---------ATLYWYQQALGQGP---E
FLTYFN-Y--EAQP--DKSGLPNDRFSAERPE-GSNSTQT------IQ-RTEQRDSAMYL
CASSL-----
>V29RF-AACZ03053988.1-trbv |(11127, 11423)|3.0|(1.000,1.000,1.000)|1
--PVDAGVTQSPTHLIKTRGQHVTLRCSPISGH---------TSVSWYQQALGQGP---Q
FIFEYY-E--KEER---GRGNFPDRFSARQFP-NYSSELN------VN-ALLLGDSALYL
CASSL-----
>V30RF-AACZ03053988.1-trbv |(18445, 18742)|2.99899600001|(1.000,0.999,1.000)|1
--PVNAVVTQTPKFQVLKTGQSMTLQCAQDMNH---------DCMSWYRQDPGMGL---R
RIHYSV-A--AGIT---DKGEVPDGYNVSRSN-KEDLPLR------LE-SAAPSQTSVYF
CASSY-----
>V31RF-AACZ03053988.1-trbv |(23071, 23371)|3.0|(1.000,1.000,1.000)|1
--HTGAGVSQSPRYKVTKRGQDVALRCDPISGH---------VSLFWYQQALGQGP---E
FLTYFR-N--EAQL--DKSGLPSDRFFAERPE-GSVSTLK------IQ-RTQQEDSAVYL
CASSL-----
>V32RF-AACZ03053988.1-trbv |(31286, 31582)|3.0|(1.000,1.000,1.000)|1
--PVEAGVTQSPTHLIKTRGQQVTLRCSPISGH---------TSVYWYQQALGLGL---Q
FLLWYD-E--GEER---NRGNFPRRFSGRQFP-NYSSELN------VN-ALELEDSALYL
CASSL-----
>V33RF-AACZ03053988.1-trbv |(40506, 40806)|2.994900005|(1.000,0.995,1.000)|1
--HADTGVSQDPSHKITKRGQNVTFRCDPISEH---------NRLYWYRQTLGQCP---E
FLTYFQ-N--EAQL--EKSRLLSDRFSAERPK-GSFSTLE------IQ-HTEQGDSAIYL
CASSL-----
>V34RF-AACZ03053988.1-trbv |(47037, 47334)|3.0|(1.000,1.000,1.000)|1
--SVAAGVIQSPRYLIKEKRETATLKCYPIPRH---------DTVYWYQQGPGQDP---Q
FLISFY-E--KMQS---DKGSIPDRFSAQQFS-DYHSELN------MS-SLELGDSALYF
CASSS-----
>V35RF-AACZ03053988.1-trbv |(55269, 55566)|2.985900005|(0.997,0.997,0.992)|1
--HMDAGITQSPRHKVTETGTPVTLRCHQTENH---------RYMYWYRQDPGHGL---R
LIHYSY-D--VKDT---DKGEVSDGYSVSRSK-TEDFLLT------LE-STTSSQTSVYF
CAISE-----
>V36RF-AACZ03053989.1-trbv |(6507, 6807)|2.95204798746|(0.996,0.961,1.000)|1
--LIEAGVVQSPRYKIIEKKQPVAFWCNPISGH---------NTLYWYWQNLGQGP---E
LLIRYE-N--EEAV--DDSQLPKDRFSAERLK-GVDSTLK------IQ-PAELGDSAVYL
CASSL-----
>V37RF-AACZ03053989.1-trbv |(12103, 12403)|3.0|(1.000,1.000,1.000)|1
--HTDAGVIQSPRHEVTEMGQEVTLRCKPISGH---------NSLFWYRQTMMQGL---E
LLIYFN-N--NVPI--DDSGMPKDRFSAKMPN-ASFSTLK------IQ-PSEPRDSAVYF
CASSL-----
>V38RF-AACZ03053991.1-trbv |(6886, 7186)|2.97007231762|(0.993,0.999,0.979)|1
--LIDAGVTQTPRHKVTEMGQEVTMRCQPILGH---------NTVFWYRQTMMQGL---E
LLAYFR-N--RAPL--DDSGMPKDRFSAEMLD-ATLATLK------IQ-PSEPRDSAVYF
CASGL-----
>V39RF-AACZ03053991.1-trbv |(13707, 14007)|2.98974003277|(0.999,0.991,1.000)|1
--HIEAGVTQFPSHSVIEKGQTVTLRCDPVSGH---------DNLYWYRRVMGNEI---K
FLLHFV-K--ESKQ--DESGMPNNRFLAERTG-GTYSTLK------VQ-PAELEDSGVYF
CASSQ-----
>V40RF-AACZ03053991.1-trbv |(18826, 19123)|2.98893600205|(0.995,0.995,0.999)|1
--HGDAKVIQNPRYQVTQFEKPVTLGCSQNLNH---------NVMYWYQQKSSQAP---K
LLFHYY-D--KDF---NNEADTPDNFQSRRPN-TSFCFLD------IR-SPGLGDAAMYL
CATSR-----
>V41RF-AACZ03053991.1-trbv |(23811, 24111)|2.99899600001|(1.000,1.000,0.999)|1
--SPGEEVTQTPKHLVRGEGQKAKLYCAPIKGH---------SYVFWYQQVLKKEF---K
FLISFQ-N--ENVF--DKTGMPKERFSAKCLS-NSPCSLE------IQ-ATKLEDSAVYF
CASSQ-----
>V42RF-AACZ03053991.1-trbv |(41750, 42046)|2.95738267424|(0.999,0.965,0.998)|1
--LSNAGVMQNPRHLVRRRGQEARLRCSPVKGH---------NHVYWYRQLPEEGL---K
FMVYLQ-K--ENII--DESGMPKERFSAEFPK-EGPSILR------IQ-QAVRGDSAAYF
CASS------
>V43RF-AACZ03053991.1-trbv |(44878, 45175)|2.99093200206|(0.996,1.000,0.995)|1
--TVDGGITQSPKYLFRKEGQNVTLNCEQNLNH---------DAMYWYRQDPGQGL---R
LIYYSQ-I--VNDF---QKGDIAEGYSVSREK-KESFPLT------VT-LAQKNPTAFYL
CASSI-----
>V44RF-AACZ03053992.1-trbv |(7444, 7744)|2.96474839429|(0.997,0.985,0.984)|1
--STDTKVTQRPRLLVKASEQKAKMDCVPIKGH---------SYVYWYRKKLEEEL---K
FLIYFQ-N--EELI--QKAEIINERFLAQCPK-NSSCTLE------IQ-STESGDTALYF
CASSK-----
>V45RF-AACZ03053992.1-trbv |(16518, 16818)|2.99899600001|(1.000,1.000,0.999)|1
--SFHAKVTQTPGHLVKGKGQKTKMDCTPEKGH---------VFVYWYQQNQNKEF---M
LLISFQ-N--EQVL--QETEMHKKRFSSQCPK-NTPCSLA------IL-SSEPGDTALYL
CASSQ-----
>V46RF-AACZ03053992.1-trbv |(27256, 27554)|2.35410587611|(0.994,0.998,0.683)|1
--SMDADVTQTPRNRITKTGKRIMLECSQTKGH---------DRMYWYRQDPGLGL---R
LIYYSF-D--VKDI---NKGEISDGYSVSRQA-QAKFSLS------LE-SAIPNQTALYF
CATSD-----
>V47RF-AACZ03053992.1-trbv |(41278, 41575)|2.99899600001|(1.000,0.999,1.000)|1
--LMEADIYQTPRYLVIGTGKKIALECSQTMGH---------DKMYWYQQDPGMEL---H
LIHYSY-G--VNST---EKGDLSSESTVSRIR-TEHFPLT------LE-SARPSHTSQYL
CASSE-----
>V48RF-AACZ03053994.1-trbv |(21067, 21364)|2.994900005|(1.000,1.000,0.995)|1
--PLEAQVTQNPRYLITVTGKKLTVTCSQNMNH---------DYMSWYRQDPGLGL---R
QIYYSV-N--VEVI---DKGDVPEGYNVSRKE-KRNFPLI------LE-SPSPNQTSLYF
CASSL-----
>V49RF-AACZ03053994.1-trbv |(26364, 26661)|2.99798400013|(1.000,1.000,0.998)|1
--LVDVKVTQSSRYLVKRMGEKVFLECVQDMDH---------ENMFWYRQDPGLGL---R
LIYFSY-D--VKMK---EKGDIPEGYSVSREK-KERFSLI------LE-SASTNQTSMYL
CASSL-----
>V50RF-AACZ03053995.1-trbv |(9498, 9801)|2.9428984707|(0.995,0.956,0.998)|1
-SVFSAVISQKPSRDICQRGTSLTIQCQVNSQV---------TMMFWYRQQPGQSP---T
LIATANQG--SEAT--YETGFVIDKFPISRPN-LTFSTLT------VS-NMSPEDSSIYL
CSVE------
>V51RF-AACZ03066999.1-trbv |(221141, 221441)|2.94630491943|(0.992,0.982,0.974)|1
--SMDTKVTQRPRLLVKANEQKAKTDCVPIKRH---------SYVYWYHKTLEEEL---K
FLIYFQ-N--EEII--QKAEIINERFSAQCPQ-NSPCTLE------IQ-STESGDTAWYF
CANSK-----
>V53RF-AACZ03067000.1-trbv |(17891, 18182)|3.0|(1.000,1.000,1.000)|1
--LMEAEIYQTPRHRVIGTGKKITLECSQTMGH---------DKMYWSRSRNGITP---H
PPFL---W--VNST---EKGDLSSESTVSRIR-IERFPLT------LE-SASPSHTSQYL
CASSE-----
>V54RF-AACZ03067007.1-trbv |(7737, 8040)|2.99799600001|(0.999,0.999,1.000)|1
-SVFSAVISQKPSRDICQRGTSMTIQCQVDSQV---------TMMFWYCQQPGQSM---T
LIATANQG--SEAT--YESRFVIDKFPISRPN-LTFSTLT------VS-NRRPEDSSIYL
CSVE------
>V55RF-AACZ03070936.1-igkv |(7433, 7733)|3.0|(1.000,1.000,1.000)|1
-ARCDIQMTQSPSSLSASVGGRVTITCRASQGI------S--NNLNWYQQKPGKTP---K
LLIYA-------AS--SLQSGIPSRFSDSG--SGTDYTLT------IS-SLQPEDFATYY
CQQSDSTP--
>V56RF-AACZ03095312.1-trav |(40528, 40815)|2.99496000066|(0.997,0.998,1.000)|1
--VRSQQPVQSPQAVILREGEDAVINCSSSKAL---------YSVHWYRQKHGEAP---V
FLMMLL-K--GGE------QKGHDKISASFNEKKQQSSLY------LM-ASQLSYSGTYF
CGAE------
>V57RF-AACZ03095314.1-trav |(457, 747)|3.0|(1.000,1.000,1.000)|1
-VSSEDKVVQSPLSLVVHEGDTVTLNCSYEVTN------F--QSLLWYKQEK-KAP---T
FLFMLT-S--SGI------EKKSGRLSSILDKKELFSILN------IT-ATQTGDSAIYL
CAVE------
>V58RF-AACZ03095317.1-trdv |(27773, 28074)|2.92122621922|(0.999,0.999,0.938)|1
-SGMAQTVTQSQPEMSVQEAETVTLSCTYDTSE-----SN--YYLFWYKQPPSRQM---I
LVIRQE-A--YKQ-----QNATENRFSVNFQKAAKSFSLK------IS-DSQLGDTAMYF
CAFM------
>V59RF-AACZ03095317.1-trav |(36941, 37243)|2.99798400013|(1.000,0.998,1.000)|1
-FSMAQTVTQTQPEMSVQEAETVTLSCTYDTSE-----SD--YYLFWYKQPPSRQM---I
LVIRQE-A--YKQ-----QNATENRFSVNFQKAAKSFSLK------IS-DSQLGDAAMYF
CAYRS-----
>V60RF-AACZ03095319.1-trav |(17030, 17318)|2.99899600001|(1.000,0.999,1.000)|1
-LSGELKVEQNPLFLSTQEGKNYTIYCNYSTT-------S--DRLYWYRQDPGKSL---E
SLFVLL-S--NGA------VKQEGQLMASLDTKARLSTLH------IT-AAVHDLSATYF
CAV-------
>V63RF-AACZ03097611.1-trav |(13712, 14009)|2.59017965917|(0.992,0.773,1.000)|1
-GLRAQSVAQPEDQVKVAEGNPLTVKCTYSVSG-----N---PYLFWYVQYPNRGL---Q
FLLKYI-T--GDN-----LVKGSYGFEAEFNKSQTSFHLK------KP-SALVSDSALYF
CAVR------
>V64RF-AACZ03097612.1-trav |(9441, 9731)|3.0|(1.000,1.000,1.000)|1
-MSRGEDVEQS-LFLSVREGDSSVINCTYTDSS------S--TYLYWYKQEPGAGL---Q
LLTYIF-S--NMD------MKQDQRLTVLLNKKDKHLSLR------IA-DTQTGDSAIYF
CAES------
>V65RF-AACZ03097613.1-trav |(2901, 3189)|3.0|(1.000,1.000,1.000)|1
--VKSQKIEQNSEALNIQEGKTATLTCNYTNYS------P--AYLQWYRQDPGRGP---V
FLLLIR-E--NEK------EKRKERLKVTFDTTLKQGVFH------IT-ASQPADSATYL
CAL-------
>V66RF-AACZ03097613.1-trav |(17275, 17562)|3.0|(1.000,1.000,1.000)|1
-ANGENQVEHSPHFLGPQQGDVASMSCTYSVSR------F--NNLQWYRQNTGMGP---K
HLLSMY-S--AGY------EKQKGRLNATLLKN--GSSLY------IT-AVQPEDSATYF
CAVD------
>V67RF-AACZ03097613.1-trav |(45730, 46024)|3.0|(1.000,1.000,1.000)|1
-GINGDSVVQTEGQVLLSEGDSLIVNCSYETTQ-----Y---PSLLWYVQYPGEGP---Q
LLLKAM-K--AND------NGRNKGFEATYRKETTSFHLE------KD-SVQESDSAVYF
CALS------
>V68RF-AACZ03097613.1-trav |(59820, 60113)|3.0|(1.000,1.000,1.000)|1
-GSGKNQVEQSPQSLIILEGKNCTLQCNYTVSP------F--NNLRWYKQDTGRGP---V
SLTIMT-F--S-E-----NTKSNGRYTATLDADTKQSSLH------IT-ASQLSDSASYI
CVVS------
>V69RF-AACZ03097613.1-trav |(75553, 75841)|3.0|(1.000,1.000,1.000)|1
VWSQRKEVEQDPGPFNVPEGATVAFNCTYSNSA------S--QSFFWYRQDCRKEP---K
LLMSVY-S--S--------GNEDGRFTAQLNRASQYISLL------IR-DSKLSDSATYL
CAV-------
>V70RF-AACZ03097613.1-trav |(86767, 87064)|2.99799200002|(1.000,0.999,0.999)|1
-TVRAQSVTQPDIHITVSEGASLELRCNYSYGA-----T---PSLFWYVQSPGQGL---Q
LLLKYF-S--GDT-----LVQGIKGFEAEFKRSQSSFNLR------KP-SVHWSDAAEYF
CAVG------
>V71RF-AACZ03097614.1-trav |(12294, 12584)|2.99899600001|(1.000,1.000,0.999)|1
--VNGENVEQHPSTLSVQEGDGAVIKCTYSDSA------S--NYFPWYKQELGKGP---Q
LIIDIH-S--NMG------EKKDQRIAVTLNKTAKHFSLH------IT-ETQPEDSAVYF
CAAS------
>V72RF-AACZ03097614.1-trav |(31772, 32063)|2.99493200206|(1.000,0.996,0.999)|1
VWSQQKEVEQNSGPLSVPEGAIVSLNCTYSDRR------S--QSFFWYRQYSGKSP---E
LIMSIY-S--NGD------E-EDGKFTAQLNKASQYVSLL------IR-DSQPSDSATYL
CAV-------
>V73RF-AACZ03097614.1-trav |(38270, 38567)|3.0|(1.000,1.000,1.000)|1
-GTRAQSATQLDSHVSVSEGALVLLRCNYSSSV-----P---PYLFWYVQYPNQGL---Q
LLLKYT-T--GAT-----LVKGINGFEAEFKKSETSFHLT------KP-SAHVNDAAEYF
CAVS------
>V74RF-AACZ03097618.1-trav |(4827, 5130)|3.0|(1.000,1.000,1.000)|1
-PGIAQKITQTQPGMFVQEKEAVTLDCTYDTSD-----QS--YGLFWYKQPSSGEM---I
FLIYQG-S--YDQ-----QNATEGRYSLNFQKARKSANLV------IS-ASQLGDSAMYF
CAMKE-----
>V75RF-AACZ03097618.1-trav |(21644, 21938)|3.0|(1.000,1.000,1.000)|1
-RTRGDSVTQMEGPVTLSEEAFLTINCTYTATG-----Y---PSLFWYVQYPGEGL---Q
LLLKAT-K--ADD------KGSNKGFEATYRKETTSFHLE------KD-SVQASDSAVYF
CALS------
>V76RF-AACZ03097619.1-trav |(24003, 24296)|3.0|(1.000,1.000,1.000)|1
VWSQQKEVEQDPGPLSVPEGAIASLNCTYSNSA------F--QYFMWYRQYSRKGP---E
LLMYTY-S--SDN------K-EDGRFTAQVDKSSKYISLF------IR-DSQPSDSATYL
CAMS------
>V77RF-AACZ03097619.1-trav |(56042, 56329)|3.0|(1.000,1.000,1.000)|1
--VNSQQGEEDPQALSIQEGENAIMNCSYKTS-------I--NNLQWYRQNSGRGL---V
HLILIR-S--NER------EKHSGRLRVTLDTSKKSSSLL------IT-ASRAADTASYF
CATD------
>V78RF-AACZ03097619.1-trdv |(66115, 66418)|3.0|(1.000,1.000,1.000)|1
-SSMAQKVTQAQTEISVVEKEDVTLDCVYETRD-----TT--YYLFWYKQPPSGEL---V
FLIRRN-S--FDE-----QNEISGRYSWNFQKSTSSFNFT------IT-ASQVVDSAVYF
CALSE-----
>V79RF-AACZ03097619.1-trav |(99749, 100036)|2.99696400065|(1.000,1.000,0.997)|1
-LSGEDQVTQSPEALRLQEGESSSLNCSYTVSG------L--RGLFWYRQDPGKGP---E
FLFALY-S--AGE------EKEKERLKATLTKK--ESFLH------IT-APKPEDSATYL
CAVQ------
>V80RF-AACZ03097619.1-trav |(111650, 111949)|2.72150309321|(0.977,0.833,0.992)|1
-VSSKQEVTQIPAALSVPEGDNLVLNCSFTDSA------I--YNLQWFRQDPGKGL---T
SLLLIQ-S--SQR------EQTSGRLNASLDKSSGRSTLY------IA-ASQPGDSATYL
CAVRHS----
>V81RF-AACZ03097622.1-trdv |(8097, 8397)|2.99194800078|(0.999,0.997,0.996)|1
-SSVAQKVTQAQSSVSMPVRKAVTLNCLYEASWW----S---YYIFWYKQLPSKEM---V
FLIRQG-S--GEQ-----NA-KSGRYSVNFKKAAKSVALT------IS-ALQLEDSAKYF
CAFWE-----
>V82RF-AACZ03097622.1-trav |(17372, 17662)|2.7696729805|(0.993,0.856,0.993)|1
-VSSILNVEQSPQSLHVQEGDSTNFTCSFTSSN------F--YALHWYRWETAKSP---E
ALFVMT-L--NGD------EKKKGRISATLNTKEGYSYLY------IK-GSQPEDSATYL
CAF-------
>V83RF-AACZ03097624.1-trav |(2805, 3104)|2.97439727933|(0.999,0.998,0.979)|1
--VNGQQVMQIPQYQHVQEGEDFTTYCNSSTTL---------SNIQWYKQRPGGHP---V
FLIQLV-K--SGE------VKKQKRLTFQFGEAKKNSSLH------IT-ATQTTDVGTYF
CAGHSAPQ--
>V84RF-AACZ03097624.1-trav |(14019, 14309)|2.85093470935|(0.988,0.897,0.999)|1
--TIIDAKTTQPTSMDCAEGRAANLPCNHSTIS-----GN--EYIHWYRQIHSQGP---Q
YIIHGL-K--NNETNEMAS------L--IITEDRKSSTLI------LP-HATLRDTAVYY
CIVRV-----
>V85RF-AACZ03097899.1-ighv |(18928, 19237)|2.99899600001|(1.000,0.999,1.000)|1
-TYSQVQLVQSG-HEVKQPGASVKVSCKASGYSF----TT--YGMNWVRQAPGQGL---E
WMGWFNT--YTGNP--TYAQGFTGRFVFSMDTSVSTAYLQ------IS-SLKAEDTAMYY
CAR-------
>V86RF-AACZ03097899.1-ighv |(75199, 75508)|3.0|(1.000,1.000,1.000)|1
-VQCEVQLLESG-GGLVQPGGSLRLSCAASGFTF----SS--YWMHWVRQAPGKGL---E
WVSRINS--DGSST--SYADSVKGRFTISRDNAKNTLYLQ------MN-SLRAEDTAVYY
CTR-------
>V87RF-AACZ03097899.1-ighv |(83090, 83405)|3.0|(1.000,1.000,1.000)|1
-VQCEVQLVESG-GGLVQPGGSLRLSCAASGFTF----SG--SAMHWVRQASGKGL---E
WVGRIRSKANSYAT--AYAASVKGRFTISRDDSKNTAYLQ------MN-SLKTEDTAVYY
CAR-------
>V88RF-AACZ03097900.1-ighv |(7950, 8265)|2.99899600001|(1.000,1.000,0.999)|1
-VQCEVQLLESG-GGLVQPGGSLRLSCAASGFTF----SD--YYMDWVRQAPGKGL---E
WVGRIRNKANSYTT--EYAASVKGRFTISRDDSKNSLYLQ------RN-SLKTEDTAVYY
CTR-------
>V89RF-AACZ03097900.1-ighv |(23404, 23719)|2.99796800026|(0.998,1.000,1.000)|1
-VQCEVQLVESR-GGLVQPGGSLRLSCAVSGFTF----SD--YYMSWVRQAPGKGL---E
WVGFIRNKANGGTT--EYTTSVKGRFTISRDDSKSITYLQ------MN-SLKTEDTAVYY
CSR-------
>V90RF-AACZ03097900.1-ighv |(27981, 28295)|2.88323004247|(0.998,0.932,0.973)|1
-VLSQVTLKESG-PALVKPTETLTLTCTFSGFSL----STSGMRVSWIRQPPGKAL---E
WLARIDW---DDDK--YYSTSLKTRLTISKDTSKNQVVLT------MT-NMDPVDTATYY
CARI------
>V91RF-AACZ03097900.1-ighv |(37008, 37317)|2.99180001921|(1.000,0.999,0.993)|1
-VQSQVQLVQSG-AEVKKPGSSVKVSCKVSGGTF----SS--YAISWVRQAPGQGL---E
WMGVIIP--ILGTA--NYAQKFQGRVTITADESTSTAYME------LS-SLRSEDTAVYY
CAT-------
>V92RF-AACZ03097900.1-ighv |(75733, 76039)|3.0|(1.000,1.000,1.000)|1
-VQCEVQLVESG-GGLVQPGGSLRLSCAASGFTF----SS--YHMSWVRQAPGKGL---E
WVSVIYS--GG-ST--YYADSVKGRFTISRDNSKNTLYLQ------MN-SLRAEDTAVYY
CAR-------
>V93RF-AACZ03097900.1-ighv |(92730, 93036)|3.0|(1.000,1.000,1.000)|1
-VQCEVQLVESG-GGLVQPGGSLRLSCAASGFTF----SS--YAMHWVRQAPGKGL---E
WVSLIYS--G-DST--YYADSVKGRFTISRDNSKNTLYLQ------MG-SLRAEDTAVYY
CAR-------
>V94RF-AACZ03097904.1-ighv |(3428, 3734)|3.0|(1.000,1.000,1.000)|1
-VLSQLQLQESG-PGLVKPSETLSLTCTVSGGSI----S--SYYWSWIRQPPGKGL---E
WIGYIYYS---GSA--YYNPSLKSRVTISVDTSKNQFSLK------LS-SVTAADTAVYY
CAR-------
>V95RF-AACZ03097905.1-ighv |(2226, 2538)|2.96886891211|(1.000,0.972,1.000)|1
-VLSQLQLQESG-PGLVKPSQTLSLTCTVSGGSI----SSGSYYWSWIRQPAGKGL---E
WIGNIYYS---GST--YYNPSLKSRVTISVDTSKNQFSLK------LS-SVTAADTAVYY
CAR-------
>V96RF-AACZ03097906.1-ighv |(13610, 13916)|3.0|(1.000,1.000,1.000)|1
-VQCEVQLVESG-GGLVQPGGSLRLSCAASGFTV----SS--YHMSWVRQAPGKGL---E
WVSVIYS--GG-ST--YYADSVKGRFTISRDNSKNTLYLQ------MN-SLRAEDTAVYY
CAR-------
>V97RF-AACZ03097906.1-ighv |(27525, 27832)|2.97754104219|(1.000,0.998,0.981)|1
-VCAEVQLVQSG-AEVKKPGESLKISCKGSGYSF----TS--YWIGWVRQMPGKGL---E
WMGIIYP--GDSDT--RYSPSFQGQVTISADKSISTAYLQ------WS-SLKASDTAMYY
CA--------
>V98RF-AACZ03097906.1-ighv |(49257, 49572)|3.0|(1.000,1.000,1.000)|1
-VQCEVQLVESG-GGLVQPGRSLRLSCTASGFTF----GD--YAMSWIRQAPGKGL---E
WVGFIRSKAYGGTT--EYAASVKGRFTISRDDSKSIAYLQ------MN-GLKTEDTAVYY
CTR-------
>V100RF-AACZ03097906.1-ighv |(72260, 72569)|3.0|(1.000,1.000,1.000)|1
-AHSQVQLVQSG-AEVKKPGASVKVSCKASGYTF----TS--YTISWLRQAPGQGL---E
WMGVISP--SDGST--SYAQKFQGRVTMTRDTSTSTVYME------LS-SLRSEDTAVYY
CAR-------
>V101RF-AACZ03097906.1-ighv |(76385, 76694)|3.0|(1.000,1.000,1.000)|1
-AYSQMQLVQSG-AEVKKPGSSVKVSCKASGYTF----TY--RYLHWVRQAPGQAL---E
WMGWITP--YNGNT--NYAQKFQDRVTITRDRSMSTAYME------LR-SLRSEDSAVYY
CAR-------
>V102RF-AACZ03097910.1-ighv |(1033, 1344)|3.0|(1.000,1.000,1.000)|1
-VQCEVQLVESG-GGVVQPGGSLRLSCAASGFTF----DD--YAMHWVRQAPGKGL---E
WVSLISW--DGGST--YYADSVKGRFTISRDNSKNSLYLQ------MN-SLRAEDTALYY
CAKD------
>V103RF-AACZ03097912.1-ighv |(17400, 17707)|2.98421230726|(1.000,0.999,0.986)|1
-VQCEVQLVESG-GGLVQPESSLKLSCAASGFTF----SS--YAMNWVRQAPGKGL---E
WVAHIWND--GSQK--YYADSVKGRFTISRDNSKSMLYLQ------MD-SLKAEDTAMYY
CT--------
>V104RF-AACZ03097916.1-ighv |(3845, 4154)|3.0|(1.000,1.000,1.000)|1
-VLSQVQLQESG-PGLVKPSETLSLTCAVSGYSI----SS-GYYWGWIRQPPGKGL---E
WIGSIYHS---GST--YYNPSLKSRVTISVDTSKNQFSLK------LS-SVTAADTAVYY
CAR-------
>V105RF-AACZ03097919.1-ighv |(14915, 15224)|2.9689000027|(0.990,0.993,0.986)|1
-VQCEVQLVESG-GGLVQPGGSLRLSCAASGFTF----SN--SDTNWVHQAPGKGL---E
LVSGVSW--NGSRM--HYADSVKGRFIISRDNSRNSLYLQ------TN-SLRAEDTAVYY
CVR-------
>V106RF-AACZ03098145.1-ighv |(4162, 4471)|2.99796800026|(0.998,1.000,1.000)|1
-VQCQVQLVESG-GGVVQPGRSLRLSCAASGFTF----SS--YGMHWVRQAPGKGL---E
WVAFISY--DGSNK--HYADSVRGRFTISRDNSKNTLYLQ------MN-RLRAEDTAVYY
CAR-------
>V107RF-AACZ03098146.1-ighv |(6178, 6490)|2.93623828262|(1.000,0.948,0.999)|1
-VLSQVQLQESG-PGLVKPSQTLSLTCAVSGGSI----TSGYYYWSWIRQPPGKGL---E
WIGGIYTS---GST--YYNPSLKSRVTISVDTSKNQFSLK------LS-SVTAADTAVYY
CAR-------
>V108RF-AACZ03098148.1-ighv |(5185, 5491)|2.30684234393|(0.942,0.871,0.709)|1
-VLSQVQLQQWG-AGLVKPSETLSLTCAVYGGSF----S--DYYWGWVRQPPGKGL---E
WIGHINY---GGST--NYNPSLKSRVTISVDKSKNQFSLK------LS-SVTAADTAVYY
CAR-------
>V109RF-AACZ03098176.1-ighv |(689, 998)|2.9918720041|(1.000,0.996,0.996)|1
-VQCQVRLVESG-GGVVQPGRSLRLSCAASGFTF----SS--YGMHWVRQAPGKGL---E
WVAFIQY--DGSNK--YYADSVKGRFTISKDNSKNTLYLQ------MN-SLRAEDTAVYY
CAR-------
>V110RF-AACZ03102011.1-ighv |(12521, 12836)|2.88008905658|(0.992,1.000,0.913)|1
-VQCEVQLVESG-GGLVQPGGSLRLSCAASGFTF----SD--HYMSWVRQAQGKGL---E
LVGLIRNKANSYTT--EYAASVKGRFTISREDLKNTLYLQ------MS-SPKTEDLAVYY
CAR-------
>V111RF-AACZ03102011.1-ighv |(35465, 35774)|2.82742974105|(0.984,0.966,0.904)|1
-AQSRVQLVQSG-AEVKKPGASVKVSCKASGYTF----TS--YCMHWVRQAHAQGL---E
WMGLVCP--SDGST--SHAQKFQGRVTITRDTSMSTAYME------LS-SLRSEDMAMYY
CVR-------
>V112RF-AACZ03106490.1-ighv |(5495, 5804)|3.0|(1.000,1.000,1.000)|1
-VQCEVQLVESG-GGLVQPGGSLRLSCAASGFTF----SS--YWMHWVRQAPGKGL---V
WVSRINS--DGSST--SYADSLKGQFTISRDNAKNTLYLQ------MN-SLRAEDMAVYY
CTR-------
>V113RF-AACZ03107095.1-ighv |(2793, 3107)|2.94523565456|(0.990,0.964,0.994)|1
-VLSQVTLKESG-PALVKPTETLTLTCTLSGFSL----STSGMGMSWIRQPPGKAL---E
WLAHIFS---NDKK--SYSTSLKNRLIISKDTSKSQVVLT------MT-NMDPVDTATYY
CAWR------
>V114RF-AACZ03126842.1-igkv |(17937, 18255)|2.96945704707|(0.995,0.976,1.000)|1
-SSGDIVMTQTPLSLPVTPGEPASISCRSSESLLDTDDEH--TYLNWYLQKPGQSP---Q
LLIYE-------VS--NRASGVPDRFSGSG--SGTDFTLK------IS-RVEAEDVGVYY
CMQALQTP--
>V115RF-AACZ03126842.1-igkv |(27906, 28206)|2.99593600205|(1.000,1.000,0.996)|1
-ARCDIQMTQSPSSLSASVGDRVTITCRASQGI------S--NNLNWYQQKPGKTP---K
LLIYA-------AS--SLQSGIPFRFSDSG--SGTDYTLT------IS-SLQPEDFATYY
CQQSDSTP--
>V116RF-AACZ03127129.1-iglv |(13910, 14207)|3.0|(1.000,1.000,1.000)|1
-SVASYELTQPS-SVSVSPGQTARITCSGD--V----LAK--NYARWFQQKPGQAP---V
LVIYK-------DS--ERPSGIPERFSGSS--SGTTVTLT------IS-GAQVEDEADYY
CYSAADNN--
>V117RF-AACZ03127129.1-iglv |(32581, 32884)|2.99899200002|(0.999,1.000,1.000)|1
-SEASYELTQPP-SVSVSPGQTARITCSGD--A----LPK--QYAYWYQQKPGQAP---V
LVIYK-------DS--ERPSGIPERFSGSS--SGTTVTLT------IS-GVQAEDEADYY
CQSADSSGTY
>V118RF-AACZ03127131.1-iglv |(7169, 7472)|2.99798400013|(1.000,0.998,1.000)|1
-SVTSYELTQPP-SVSVAPGQTARITCGGN--N----IGS--KAVHWYQQKPGQAP---V
LVIYY-------DS--DRPSGIPERFSGSN--SGNTATLT------IS-RVEAGDEADYY
CQVWDSSSKH
>V119RF-AACZ03127131.1-iglv |(15097, 15400)|3.0|(1.000,1.000,1.000)|1
-SVVSSELTQDP-AVSVALGQTVRITCQGD--S----LRS--YYASWYQQKPGQAP---V
LVIYG-------NN--NRPSGIPDRFSGSS--SGNTASLT------IT-GAQAEDEADYY
CSSLDSSGNH
>V120RF-AACZ03127135.1-iglv |(12358, 12661)|2.99593600205|(1.000,0.996,1.000)|1
-SEASYELTQPP-SVSVSLGQTARITCSGE--A----LPK--KYAYWYQQKPGQAP---V
LVIYK-------DS--ERPSGIPERFSGSS--SGTIVTLT------IS-GVQAEDEADYY
CQSADSSGTY
>V122RF-AACZ03127139.1-iglv |(1837, 2140)|2.90522628274|(0.990,0.988,0.938)|1
-SATSYELTQPH-SVSVATAQMARITCGGN--N----IGS--KAVHWYQQKPGQDP---V
LVIYS-------DS--NRPSGIPERFSGSN--SGNTATLT------IS-RVEAGDEVDYY
CQVWDSSSDH
>V123RF-AACZ03127139.1-iglv |(22125, 22435)|2.96687023728|(0.998,0.996,0.975)|1
-SWAQSALTQPP-SVSRSPGQSVTISCTGTSSDV---GGY--NYVSWYQQHPGKAP---K
LMIYD-------VS--KRPSGVPDRFSGSK--SGNTASLT------IS-GLQAEDEADYY
CCSYAGSYS-
>V124RF-AACZ03127139.1-iglv |(41415, 41718)|3.0|(1.000,1.000,1.000)|1
-SEASYELTQPP-SVSVSPGQTARITCSGD--A----LPK--QYAYWYQQKSGQAP---V
LIIYE-------DS--KRPSGIPERFSGSS--SGTMATLT------IS-GAQVEDEADYY
CYSTDSSGNH
>V125RF-AACZ03127139.1-iglv |(52418, 52728)|2.80265900353|(1.000,1.000,0.869)|1
-SWAQSALTQPP-SASGSPGQSVTISCTGTSSDI---GGY--NYVSWYQQHPGKAP---K
LMIYE-------VS--KRPSGVPDRFSGSK--SGNTASLT------VS-RLQAEDEADYY
CSSYAGSNN-
>V127RF-AACZ03127143.1-iglv |(3944, 4240)|2.99899600001|(1.000,0.999,1.000)|1
-SVASYELTQPP-SVSVSPGQTASITCSGD--K----LGD--KYAYWYQQKSGQSP---V
LVIYQ-------DS--KRPSGIPERFSGSN--SGNTATLT------IS-GTQAMDEADYY
CQAWDSST--
>V128RF-AACZ03151853.1-igkv |(10232, 10550)|2.92679088874|(0.996,0.943,0.999)|1
-TSGDIVMTQTPLSLPVTPGEPASISCRSSQSLLDSDDGN--TYLDWFLQKPEQSP---Q
LLIYE-------VS--NWASGVPDRFSGSG--SGTDFTLK------IS-RVEAEDVGVYY
CMQALQTP--
>V130RF-AACZ03151853.1-igkv |(48491, 48784)|3.0|(1.000,1.000,1.000)|1
-ARCDIQMTQSPSSLSASVGDRVTITCRASQSI------S--NYLSWYQQKPGKAP---K
LLIYD-------AS--TLQSGVPSRFSGSG--SGTDFTLT------IS-SLQPEDFATYY
CQRGYG----
>V131RF-AACZ03151853.1-igkv |(70778, 71078)|2.99696400065|(1.000,0.997,1.000)|1
-ARCDIQLTQSPSSLSASVGDRVTITCQASQDI------S--NYLNWYQQKPGKVP---K
LLIYS-------AS--NLQSGVPSRFSGSG--SGTDFTLT------IS-SLQPEDVATYY
CQRTYNAP--
>V133RF-AACZ03151853.1-igkv |(122999, 123314)|2.98348007169|(1.000,0.991,0.993)|1
-SSGDVVMTQSPLSLPVTLGQPASISCRSSQSLVYS-DGN--TYLSWIQQRPGQPP---R
LLIYK-------VS--NRDSGVPDRFSGSG--AGTDFTLK------IS-RVEAEDVGVYY
CVQGIQLP--
>V134RF-AACZ03151853.1-igkv |(133574, 133889)|3.0|(1.000,1.000,1.000)|1
-SSADIVMTQTPLSLSVTPGQPASISCKSSQSLLHSD-GN--TYLYWYLQKPGQSP---Q
LLIYR-------VS--NRASGVPDRFSGSG--SGTDFTLK------IS-QVEAEDVGVYY
CMQGIQLP--
>V135RF-AACZ03151853.1-igkv |(146050, 146365)|2.99798400013|(1.000,0.998,1.000)|1
-SSGDIVMTQSPLSLPVTPGEPASISCRSSQSLLHS-NRY--NYLDWYLQKPGQSP---Q
LLIYL-------GS--NRASGVPDRFSGSG--SGTDFTLK------IS-RVEAEDVGVYY
CMQALQTP--
>V136RF-AACZ03151853.1-igkv |(154335, 154635)|2.994900005|(1.000,0.995,1.000)|1
-TRCDIQMTQSPSSLSASVGDRVTITCWASQGI------S--NYLAWYQQKPGKVP---K
LLIYA-------AS--TLQSGVPSRFSGSG--SGTDFTLT------IS-SLQPEDVATYY
CQKYNSAP--
>V137RF-AACZ03151853.1-igkv |(190625, 190927)|3.0|(1.000,1.000,1.000)|1
-SSGDIVMTQTPLSSPVTLGQPASISCRSSQSLVHS-DGN--TYLSWLQQRPGQPP---R
LLIYK-------VS--NRFSGVPDRFSGSG--AGTDFTLK------IS-RVEAEDVGVYY
CTQA------
>V138RF-AACZ03151853.1-igkv |(207246, 207544)|2.62968474289|(1.000,0.791,0.999)|1
-SRGEIVLTQSPDFQSVPPKEKVTITCRASQSIG--------SSLHWYQQKPGQSP---K
LLIKY-------AS--QSISGVPSRFSGSG--SGTDFTLT------IN-SLEAEDAATYY
CQQSSSL---
>V139RF-AACZ03151855.1-igkv |(12698, 12994)|3.0|(1.000,1.000,1.000)|1
-TTGEIVLTQSSATLSLSPGERATLSCRASQSVS-----S--SYLAWYQQKPGQAP---R
LLIYD-------AS--SRATGIPDRFSGSG--SGTDFTLT------IS-RLEPEDFAVYY
CQQYGS----
>V140RF-AACZ03151855.1-igkv |(28194, 28494)|3.0|(1.000,1.000,1.000)|1
-ARCDIQMTQSPSSLSASVGDRVTITCRASQGI------S--NYLAWFQQKPGKAP---K
RLIYA-------AS--SLQSGVPSRFSGSG--SGTEFTLT------IS-SLQPEDFATYY
CLQHNSYP--
>V141RF-AACZ03151855.1-igkv |(45639, 45939)|3.0|(1.000,1.000,1.000)|1
-ARCDIQMTQSPSSLSASVGDRVTITCRASQGI------S--SWLAWYQQKPGKAP---K
PLIYA-------AS--SLQSGVPSRFSGSG--SGTEFTLT------IS-SLQPEDFATYY
CQQYNSYP--
>V142RF-AACZ03151855.1-igkv |(60285, 60585)|2.96672055687|(0.992,1.000,0.976)|1
-TTGEIVLTQSPATLSLSPGERATLSCRASQSVS--------SYLAWYQQKPGQAP---R
LLIYG-------AS--NRATGIPARFSGSG--SRTDFTLT------IS-SVEPEDFAVYY
CQQYNNQP--
>V143RF-AACZ03151857.1-igkv |(4301, 4601)|3.0|(1.000,1.000,1.000)|1
-ARCAIQLTQSPSSLSASVGDRVTITCRASQGI------S--NRLNWYQQKPGKAP---K
LLIYD-------AS--SLESGVPSRFSGSG--SGTDFTLT------IS-SLQPEDFATYY
CQQFNSYP--
>V144RF-AACZ03151857.1-igkv |(10072, 10372)|2.99496000066|(0.999,1.000,0.996)|1
-ASCDIQMTQSPSSVSASVGDRVTITCQASQGI------S--SWLAWYQQKPGKAP---K
LLIYA-------AS--SLQSGVPSRFSGNG--SGTDFTLT------IS-SLQPEDFATYY
CQQANSFP--
>V145RF-AACZ03151858.1-igkv |(2327, 2627)|3.0|(1.000,1.000,1.000)|1
-TTGEIVLTQSPATLSLSPGEKATLSCRASQSVS--------SYLAWYQQKPGQAP---R
LLIYD-------AS--NRATGISARFSGSG--SGTDFTLT------IS-SLEPEDFAVYY
CQQRSNWH--
>V146RF-AACZ03151858.1-igkv |(39404, 39704)|2.99798400013|(1.000,0.998,1.000)|1
-ARCAIQMTQSPSSLSASVGDRVTITCRASQGI------S--SYLAWYQQKPAKAP---K
LLIYY-------AS--SLQSGVPSRFSGSG--SGTEFTLT------IS-SLQPEDFATYY
CQQLNSYP--
>V147RF-AACZ03151979.1-igkv |(10219, 10519)|3.0|(1.000,1.000,1.000)|1
-AKCDIQMTQSPSTLSASVGDRVTITCRASQGI------S--SYLNWYQQKPGKAP---K
LLIYA-------AS--TLESGVPSRFSGSG--SGTEFTLT------IS-SLQPDDFATYY
CQQYSSTP--
>V148RF-AACZ03171037.1-ighv |(18459, 18781)|2.72900563293|(0.972,0.850,0.965)|1
-VLSQVTLKESG-PVLVKPTETLTLTCTISGFSL----SNAGMGVSWIRQPPGKAL---E
WLAHIFW---NDEK--SYSTSLKSRLTISKDTSKSQVVLT------MT-NMDPVDTATYY
CTRRAQ----
>V149RF-AACZ03171037.1-ighv |(42750, 43059)|2.96405224805|(0.997,0.970,1.000)|1
-THAQVQLVQSG-AEVKKPGATVKISCKASGYTL----TE--LSMHWVRQAPGKRL---E
WMGGFDP--EDGET--IYAQKFQGRVTMTEDTSTDTAYME------LS-SLRSEDTAVYY
CAT-------
>V150RF-AACZ03171037.1-ighv |(52793, 53102)|3.0|(1.000,1.000,1.000)|1
-VQCEVQLVESG-GGLVKPGGSLRLSCAASGFTF----SS--YAMHWVRQAPEKGL---E
WVSTISG--SGGST--WYPDSVKGRFTISRDNSKNTLYLQ------MN-SLRAEDTAVYY
CAR-------
>V151RF-AACZ03171037.1-ighv |(63661, 63976)|3.0|(1.000,1.000,1.000)|1
-VQCEVQLVESG-GGLVKPGGSLRLSCAASGFTF----SS--YSMNWVRQAPGKGL---E
WVGFIRTKAKGGTT--EYAASVKGRFTISRDDSKSIAYLQ------MN-SLKTEDTAVYY
CTR-------
>V152RF-AACZ03171037.1-ighv |(86377, 86686)|3.0|(1.000,1.000,1.000)|1
-VQCEVQLVESG-GGLVQPGGSLRLSCAASGFTF----SS--YGMHWVRQAPGKGL---E
WVSYISY--DSSYI--YYADSVKGRFTISRDNAKNSLYLQ------MN-SLRAEDTAVYY
CAT-------
>V153RF-AACZ03171037.1-ighv |(116832, 117141)|3.0|(1.000,1.000,1.000)|1
-VQCEVQLVESG-GGLVQPGGSLRLSCAASGFTF----DD--YGMSWVRQAPGKGL---E
WVSLISW--DGGST--YYADSVKGRFTISRDNSKNSLYLQ------MS-SLRAEDTALYY
CAR-------
>V154RF-AACZ03171037.1-ighv |(129850, 130159)|3.0|(1.000,1.000,1.000)|1
-AHSQVQLVQSG-AEVKKPGASVKVSCKASGYTF----TS--YDINWVRQATGQGL---E
WMGWMNP--NSGNT--GYAQKFQGRVTMTRDTSISTAYME------LS-SLRSEDTAVYY
CAR-------
>V155RF-AACZ03171037.1-ighv |(150598, 150907)|2.99798400013|(1.000,0.998,1.000)|1
-VQCEVQLVESG-GGLVQPGGSLTLSCAASGFTF----SS--YWMSWVRQAPGKGP---E
WVANIKK--DGSEK--YYADSVKGRFTISRDNAKNSLYLQ------MN-SLRAEDTAVYY
CTR-------
>V158RF-AACZ03171037.1-ighv |(187799, 188108)|2.99899600001|(1.000,1.000,0.999)|1
-AHSQVQLVQSG-SEVKKPGASVKVSCKASGYTF----TS--YAMNWVRQAPGQGL---E
WMGWINT--NTGNP--TYAQGFTGRFVFSLDTSVSTAYLQ------IS-SLKAEDTAVYY
CAR-------
>V159RF-AACZ03171037.1-ighv |(200692, 201001)|3.0|(1.000,1.000,1.000)|1
-VLSQVQLQESG-PGLVKPSETLSLTCAVSGGSI----SS-SNWWSWVRQPPGKGL---E
WIGEIYH---SGSP--NYNPSLKSRVTISVDKSKNQFSLK------LS-SVTAADTAVYY
CAR-------
>V160RF-AACZ03171395.1-trav |(594, 882)|3.0|(1.000,1.000,1.000)|1
--VKSQKIEQNSEALNIQEGKTATLTCNYTNYS------P--AYLQWYRQDPGRGP---V
FLLLIR-E--NEK------EKRKERLKVTFDTTLKQGVFH------IT-ASQPADSATYL
CAL-------
>V161RF-AACZ03173011.1-ighv |(4916, 5238)|2.40567904196|(0.963,0.706,0.969)|1
-VLSQVTLMESG-PALVKPTETLTLTCTLSGFSL----STSGMGMSWIRQPPGKAL---E
WLAHIFS---NDKK--SYSTSLKNRLIISKDTSKSQVVLT------MT-NMDPVDTATYY
CAWRAQ----
>V163RF-AACZ03176953.1-iglv |(11235, 11544)|2.93008808336|(1.000,0.943,1.000)|1
-SWAQSVLTQPP-SVSAAPGQKVTISCSGSSCNI---G-N--NYVSWYQQLPGTAP---K
ILIYD-------NN--KRPSGISDRFSGSK--SGTSATLG------IT-GLQTGDEADYY
CGTWDSSLSA
>V164RF-AACZ03176953.1-iglv |(41685, 41995)|2.76750316463|(0.998,0.868,0.970)|1
-SLSQPVLTQPT-SLSASPGASARLTCTLRSGIN---LGS--YRIYWYQQKPGSPP---R
YLLRYK-S--DSDK--QQGSGVPSRFSGSKDASTNAGILV------IS-GLQSEDEADYY
CMI-------
>V165RF-AACZ03176953.1-iglv |(46517, 46826)|3.0|(1.000,1.000,1.000)|1
-SWAQSVLTQPP-SASGTPGQRVTISCSGSSSNI---G-S--NTVNWYQQLPGTAP---K
LLIYS-------NN--QRPSGVSDRFSGSK--SGTSASLA------IS-GLRSEDEADYY
CAAWDDSLSG
>V166RF-AACZ03176965.1-iglv |(24589, 24892)|2.75903233646|(0.928,0.964,0.881)|1
-SWAQSALTQPP-FVSGAPGQSVTISCTGTSSDV---GDY--DHVFWYQKRLSTTS---R
LLIYN-------VN--TRPSGISDLFSGSK--SGNMASLT------IS-GLKSEVEANYH
CSLYSSS---
>V167RF-AACZ03176987.1-iglv |(5895, 6205)|2.98851611711|(1.000,0.989,1.000)|1
-SWANFMLTQPH-SVSESPGQTVTISCTRSSGSI---A-S--DYVQWYQQRPGSAP---T
TVIYE-------DN--RRPSGVPDRFSGSIGSSSNSASLT------IS-GLKSEDEADYY
CQSYDSSS--
>V168RF-AACZ03179884.1-ighv |(12665, 12971)|3.0|(1.000,1.000,1.000)|1
-VQCEVQLVQSG-GGLVQPGGSLRLSCAGSGFTF----SS--YAMHWVRQAPGKGL---E
WVSAIGT--G-GGT--YYADSVKGRFTISRDNAKNSLYLQ------RN-SLRAEDMAVYY
CAR-------
>V169RF-AACZ03182257.1-ighv |(5938, 6245)|3.0|(1.000,1.000,1.000)|1
-AQCEVQLVESG-GGLVQPGGSLRLSCAASGFTF----SN--HYTSWVLQAPGKGL---E
WVSYISG--DRGYT--NYADSVKGRFTISRDNAKNSLYLQ------MN-SLRAEDTAVYY
CV--------
>V170RF-AACZ03015561.1-igkv |(2130, 2430)|2.98742416586|(1.000,1.000,0.988)|-1
-AKCDIQMTQSPSTLSASVGDRVTITCRASQGI------S--SWLAWYQQKPGKAP---K
LLIYK-------AS--SLESGVPSRFSSSG--SGTEFTLT------IS-SLQPDDFATYY
CQQYSSYP--
>V171RF-AACZ03015561.1-igkv |(34244, 34556)|2.99796800026|(0.998,1.000,1.000)|-1
-CNGDIVLTQSPASLAVSPGQRATITCRASESVSFLG--I--NLIHWYQQKPGQPP---K
LLIYQ-------AS--NKDTGVPARFSGSG--SGTDFTLT------IN-LVEANDTANYY
CLQSKNFP--
>V172RF-AACZ03015562.1-igkv |(7056, 7356)|3.0|(1.000,1.000,1.000)|-1
-TRCDIQMTQSPSSLSASVGDRVTITCRASQGI------S--NYLAWYQQKPGKAP---K
LLIYY-------AS--RLESGVPSRFSGSG--SGTDYTLT------IS-SLQPEDFATYY
CQQYNSNP--
>V173RF-AACZ03015562.1-igkv |(21131, 21434)|2.99899600001|(1.000,1.000,0.999)|-1
-TIGEIVMTQSPATLSLSPGERATLSCRASQSVS-----S--SYLSWYQQKPGQAP---R
LLIYG-------AS--TRATGIPARFSGSG--SGTDFTLT------IS-SLQPEDFAVYY
CQQDYKLP--
>V174RF-AACZ03015562.1-igkv |(33603, 33903)|3.0|(1.000,1.000,1.000)|-1
-ARCDIQMTQSPSSLSASVGDRVTITCRASQGI------R--NDLGWYQQKPGKAP---K
LLIYA-------AS--SLQSGVPSRFSGSG--SGTDFTLT------IS-SLQPEDFATYY
CLQDYNYS--
>V175RF-AACZ03015564.1-igkv |(7726, 8026)|3.0|(1.000,1.000,1.000)|-1
-TRCDIQMTQSPSSLSASVGDRVTITCRASQSI------S--NSLAWYQQKPGKAP---K
LLIYA-------AS--RLESGVPSRFSGSG--SGTDYTLT------IS-SLQPEDFATYY
CQQYYSTP--
>V176RF-AACZ03015754.1-igkv |(14686, 14986)|3.0|(1.000,1.000,1.000)|-1
-ARCDIQVTQSPSSLSASVGDRVTITCRTSQGI------S--NGLSWYQQKPGQAP---T
LLIYA-------AS--SLQSGIPSRFSGSG--SGTDFTLT------IS-SLQPEDVATYY
CLQDYTTP--
>V177RF-AACZ03016034.1-igkv |(14230, 14530)|2.96516337871|(1.000,0.969,1.000)|-1
-ARCDIPMTQSPSSLSASVGDRVTITCRASQGI------S--NNLNWYQQKPGKTP---K
LLIYA-------AS--SLQSGIPSRFSDSG--SGTDYTLT------IS-SLQPEDFAAYY
CQQSDSTP--
>V178RF-AACZ03016143.1-igkv |(754, 1054)|2.97066265282|(1.000,0.976,0.997)|-1
-ARCAIQMTQPPSSLFASVGDSVTITCRASQSV----------TNHWYQQKPGKAP---K
LLIYR-------VS--SLQMGVPSRFSGSG--SGTDFTLT------IS-SLQPDDVATYY
CQQEYTVGVT
>V179RF-AACZ03054006.1-trbv |(3325, 3619)|2.69568630922|(0.922,0.900,0.882)|-1
--VRSQTIHQWPATLVQPVGSPLSLECTVEGTS------N--PNLYWYRQAAGRGL---Q
LLFYSV-G--IGQI----SSEVPQNLSASRPQ-DRQFILS------SK-KLLLSDSGFYL
CAWS------
>V180RF-AACZ03095321.1-trdv |(4778, 5084)|3.0|(1.000,1.000,1.000)|-1
RGMLCDKVTQSSPDQTVASGSEVVLLCTYDAVY-----SN--PDLFWYRIRPDYSF---Q
FVFYGD-N--SRSQ---AADFTQGRFSVKHILTQKAFHLV------IS-PVRTEDSATYY
CAF-------
>V181RF-AACZ03098097.1-ighv |(6348, 6654)|2.9909280013|(0.997,1.000,0.994)|-1
--HSQVQLVQSG-AEVKKLGASVKVSCKASGYTF----TD--YFIHWVQQAPGQGL---E
WMGWINP--NSGGT--NYAQKFQSRVTMTRNTSISTAYME------LS-RLRSDDTAVYY
CAR-------
>V182RF-AACZ03098100.1-ighv |(12261, 12570)|3.0|(1.000,1.000,1.000)|-1
-VLSQVQLQESG-PGLVKPSETLSLTCAVSGGSI----SS-SNWWSWVRQPPGKGL---E
WIGEIYH---SGSP--NYNPSLKSRVTISVDKSKNQFSLK------LS-SVTAADTAVYY
CAR-------
>V183RF-AACZ03098100.1-ighv |(19369, 19678)|3.0|(1.000,1.000,1.000)|-1
-AHSQVQLVQSG-AEVKKPGASVKVSCKASGYTF----TS--YAMHWVRQAPGQRL---E
WMGWINT--GNGNT--KYSQKFQGRVTITRDTSASTAYME------LS-SLRSEDTAVYY
CAR-------
>V184RF-AACZ03098103.1-ighv |(623, 937)|2.86638776087|(0.978,0.976,0.924)|-1
-VLSQVTLKESG-PTLVKPTQTLTLTCTFSGFSL----STSGVGVGWIRQPPGKAL---E
WLALIYW---DDDK--RYSPSLKSRLTITKDTSKNQVVLT------MT-NMDPVDTATYY
CAHR------
>V185RF-AACZ03127313.1-iglv |(14865, 15172)|2.99593600205|(1.000,1.000,0.996)|-1
-SWANFMLTQPH-SVSESPGQTVTISCTRSSGSI---A-S--DYVQWYQQRPGSAP---T
TVIYE-------DN--RRPSGVPDRFSGSIDSSSNSASLT------IS-GLKTEDEADYY
CQSYDSS---
>V187RF-AACZ03127321.1-iglv |(54420, 54720)|2.99599600001|(0.999,0.998,0.999)|-1
-SLSQLVLTQSP-SASASLGASVKLTCTLSSGH-----SS--YAIAWHQQQPEKGP---R
YLMKLN-S--DGSH--SKGDGIPDRFSGSSSG--AERYLT------IS-SLQSEDEADYY
CQTW------
>V188RF-AACZ03127321.1-iglv |(122715, 123024)|3.0|(1.000,1.000,1.000)|-1
-VDSQTVVTQEP-PFSVSPGGTVTLTCGLSSGSV---STS--YYPSWYQQTPGQAP---R
TLIYS-------TN--TRSSGVPGRFFGSI--IGNKAALT------IT-GAQADDESDYY
CLLYMGSGI-
>V189RF-AACZ03151873.1-igkv |(7769, 8069)|3.0|(1.000,1.000,1.000)|-1
-ARCDIQMTQSPSSLSASVGDRVTITCRASQGI------N--NNLNWYQQKPGKTP---K
LLIYA-------AS--SLQSGIPSRFCDSG--SGTDYTLT------IS-SLQPEDFATYY
CQQSDGTP--
>V190RF-AACZ03151911.1-igkv |(7475, 7775)|2.98474002125|(0.996,1.000,0.989)|-1
-ARCDIQMTQSTSSLSASVGDRVTITCRASQGI------S--NNLNWYQQKPGKTP---K
LLIYA-------AS--SLQSGILSRFSDSG--SGTDYTLT------IS-SLQPEDFAAYY
CQQSDSTP--
>V191RF-AACZ03171059.1-trav |(889, 1176)|2.83421845042|(0.977,0.892,0.995)|-1
--VRSQQPVQSPQAMILREGEDAVVNCSSSKAL---------YSVHWYRQKHGEAP---I
FLMILL-K--GGE------QKGHDKISASFNEKKQQSSLY------LM-ASQLSYSGTYF
CGAE------
>V192RF-AACZ03171126.1-ighv |(3284, 3590)|2.93833728137|(0.988,0.968,0.984)|-1
-VLSQVQLQQWG-TELLKPSETLSLTCAVYGGSF----S--GYYWSWIRQPPGKGL---E
WIGEINH---SGST--NYNPSLKSRVTISVDTSKNQFSLK------LS-SVTAADTAVYY
CAR-------
>V193RF-AACZ03171149.1-trav |(1638, 1925)|3.0|(1.000,1.000,1.000)|-1
-VSSEDKVVQSPLSLVVHEGDTVTLNCSYEVTN------F--QSLLWYKQEK-KAP---T
FLFMLT-S--SGI------EKKSGRLSSILDKKELFS-IL------NT-ATQTGDSAIYL
CAVE------
>V194RF-AACZ03171512.1-trav |(590, 893)|2.99899600001|(1.000,0.999,1.000)|-1
-PGIAQKITQTQPGMFVQEKEAVTLDCTYDTSD-----PS--YGLFWYKQPSSGEM---I
FLIYQG-S--YDQ-----QNATEGRYSLNFQKARKSANLV------IS-ASQLGDSAMYF
CAVRE-----
>V195RF-AACZ03171676.1-trav |(1205, 1504)|2.97439727933|(0.999,0.998,0.979)|-1
--VNGQQVMQIPQYQHVQEGEDFTTYCNSSTTL---------SNIQWYKQRPGGHP---V
FLIQLV-K--SGE------VKKQKRLTFQFGEAKKNSSLH------IT-ATQTTDVGTYF
CAGHSAPQ--
>V196RF-AACZ03172648.1-ighv |(10152, 10459)|3.0|(1.000,1.000,1.000)|-1
-AQCEVQLVESG-GGLVQPGGSLRLSCAASGFTF----SN--HYTSWVLQAPGKGL---E
WVSYISG--DSGYT--NYADSVKGRFTISRDNAKNSLYLQ------MN-SLRAEDTAVYY
CV--------
>V197RF-AACZ03172650.1-ighv |(24637, 24943)|3.0|(1.000,1.000,1.000)|-1
-VQCEVQLVQSG-GGLVQPGGSLRLSCAGSGFTF----SS--YAMHWVRQAPGKGL---E
WVSAIGT--G-GGT--YYADSVKGRFTISRDNAKNSLYLQ------MN-SLRAEDMAVYY
CAR-------
>V198RF-AACZ03173117.1-ighv |(1009, 1323)|2.90817800597|(0.998,0.933,0.994)|-1
-VLSQVTLKESG-PVLVKPTETLTLTCTLSGFSL----STSGMGMSWIRQPPGKAL---E
WLAHIFS---NDKK--SYSTSLKNRLIISKDTSKSQVVLT------MT-NMDPVDTATYY
CAWR------
>V199RF-AACZ03177116.1-iglv |(1182, 1492)|2.99598400013|(0.998,1.000,0.998)|-1
-SWAQSALTQPA-SVSGSPGQSITISCTGTSSDV---GGY--NAVSWYQQHPGKAP---K
LMIYD-------VN--KRPSGVSNRFSGSK--SGNTASLT------IS-GLQAEDEADYY
CSSYRSGGT-
>V200RF-AACZ03178854.1-igkv |(8334, 8634)|2.99899600001|(1.000,1.000,0.999)|-1
-ARCDIQMTQSPSSLSASVGDRVTITCWASQGI------S--NNLNWYQQKPGKTP---K
LLIYA-------AS--SLQSGIPSRFSDSG--SGTDYTLT------IS-SLQPEDFATYY
CQQSDSTS--
>V201RF-AACZ03179013.1-igkv |(41180, 41480)|3.0|(1.000,1.000,1.000)|-1
-ARCDIQMTQSPSSLSASVGDRVTITCRASQGI------S--NNLNWYQQKPGKTP---K
LLIYA-------AS--SLQSGIPSRFSDSG--SGTDYTLT------IS-SLQPEDFATYY
CQQSDSTP--
>V202RF-AACZ03179105.1-trdv |(5604, 5904)|2.98348806553|(1.000,0.992,0.992)|-1
-SSVAQKVTQAQSSVSMPVRKAVTLNCLYEASWW----S---YYIFWYKQLPSKEM---I
FLIRQG-S--DEQ-----NA-KSGRYSVNFKKAAKSVALT------IS-ALQLEDSAKYF
CALWE-----
>V204RF-AACZ03179105.1-trav |(21888, 22187)|2.73091878251|(0.954,0.846,0.979)|-1
--VNGRQVMQIPQYQHVQEGEVFTTYCNSSTTL---------SNIQWYKQRPGGHP---V
FLIQLV-K--SGE------VKKQKRLTFQFGEAKKNSSLH------IT-ATQTTDVGTYF
CAGHSAPQ--
>V205RF-AACZ03179105.1-trav |(33413, 33703)|2.89288022407|(0.991,0.922,0.999)|-1
--TIIDAKTTQSTSMDCAEGRAANLPCNHSTIS-----GN--EYIHWYRQIHSQGP---Q
YIIHGL-K--NNETNEMAS------L--IITEDRKSSTLI------LP-HATLRDTAVYY
CIVRV-----
>V206RF-AACZ03179806.1-igkv |(3188, 3488)|3.0|(1.000,1.000,1.000)|-1
-ARCDIQMTQSPSSLSASVGDRVTITCRASQGI------I--NNLNWYQQKPGKTP---K
LLIYA-------AS--SLQSGIPSRFSDSG--SGTDYTLT------IS-SLQPEDFATYY
CQQSDSTP--
>V207RF-AACZ03183442.1-igkv |(591, 891)|2.99899600001|(1.000,0.999,1.000)|-1
-ARCDIQMTQSPSSMSASVGDRVTITCRASQGI------N--NNLNWYQQKPGKTP---K
LLIYA-------AS--SLQSGIPSRFCDSG--SGTDYTLT------IS-SLQPEDFATYY
CQQSDGTP--
>V208RF-AACZ03191230.1-iglv |(228, 538)|2.97087023728|(0.998,1.000,0.975)|-1
-SWAQSALTQPP-SVSGSPGQSVTISCTGTSSDV---GGY--NYVSWYQQHPGTAP---K
LMIYD-------VS--KRPSGVPDRFSGSK--SGNTASLT------IS-GLQAEDEADYY
CCSYAGSYS-
>V0RF-ABDC01047890.1-ighv |(234, 540)|2.89498000014|(0.966,0.964,0.965)|1
-VQCNVQLVESG-GGLVQPGGSLTLSCAASRFTF----SS--YAMSWFRQAPGKGM---E
WVALIRND---GST--YYADAVKSEFTISRDNAKNKLYLQ------MN-SLRAEDTALYY
CAR-------
>V2RF-ABDC01116809.1-trbv |(7343, 7638)|2.71641976551|(0.944,0.956,0.851)|1
--LVDAEVTQTPGHLIKRTGEKVLLECSQDMDH---------ERMFWYRQDPGLGL---R
LIYFSF-D--VGSE---EKGDVWEAYSASRKQ-KDRFPLV------LE-SAGTNQTSVYL
CASR------
>V3RF-ABDC01165520.1-igkv |(7469, 7769)|3.0|(1.000,1.000,1.000)|1
-ARCDIQMTQSPSSLAASVGDTVTISCRASQGI------S--SWLSWHQQKPGKPP---K
TLINK-------AS--NLESGVPSRFSGSG--SGTDFTLT------IK-GLQPEDFATYY
CQQYDSSP--
>V4RF-ABDC01231268.1-ighv |(5361, 5667)|2.99798400013|(1.000,0.998,1.000)|1
-VQCDVQLLESG-GGLVQPGGSLRLSCAASGFTF----SS--YYMHWVRQAPGKGL---E
WVSTISS---GGST--YYADAVKGRFTISRDNGKSSLYLQ------MN-SLKAEDTAVYY
CAR-------
>V6RF-ABDC01231272.1-ighv |(378, 697)|2.97322818506|(0.993,1.000,0.981)|1
-VQCEVQLVESG-GGLVQPGGSLRLSCVASGFTL----TS--YGMNWVRQAPGKGL---E
WISYIYS----SST--SYADSVKGRFTISTDNGKNSLYLQ------MN-SLRAEDTAMYY
CARHTVRG--
>V7RF-ABDC01231274.1-ighv |(17, 332)|2.99899600001|(1.000,1.000,0.999)|1
-VQCEVQLVESG-GGLAQPGGSLRLSCAASGFTF----SS--YYMYWVRQAPGKGL---E
WVGFVRNKANGGTA--EYAASVKGRFTISRDDSKSTAYLQ------MN-SLRAEDTALYY
CAR-------
>V8RF-ABDC01231277.1-ighv |(694, 1003)|3.0|(1.000,1.000,1.000)|1
-VQCEVQLAESG-GGLVQPGGSLRLSCAASGFTF----SN--YYMYWVRQAPGKGL---E
WISTISN--SGSST--GYADSVKGRFTTSRDNSKNMLYLQ------MN-SLKAEDTALYY
CAR-------
>V9RF-ABDC01282056.1-ighv |(476, 782)|2.99899600001|(1.000,1.000,0.999)|1
-VQCEVQLVESG-GGLVQPGGSLKLSCAASGFTF----SS--YDMHWVRQAPGKGL---E
WVSVIG---IGGST--YYADAMKGRFTISRDNGKNMLYLQ------MS-SVQAEDTAVYY
CTR-------
>V10RF-ABDC01282057.1-ighv |(6536, 6845)|2.99899600001|(1.000,1.000,0.999)|1
-VQCEVQLVESG-GGLVQPGGSLRLSCAASGFTF----SS--YWMYWVRQAPGKGL---E
WVSRINP--DGGST--NYADAVKGRFTISRDNGKNTLYLQ------MN-SLKAEDTAVYY
CAR-------
>V11RF-ABDC01282063.1-ighv |(1659, 1962)|2.89230439061|(0.983,0.926,0.997)|1
-VQCEEQLVESG-GGLVQPGGSLRLSCAASGFSF----DD--YVMHWIRQAPGKGL---E
WISYIYS----SST--SYADSVKGRFTISSDNGKNMLYLQ------MN-SLRAEDTAMYY
CAR-------
>V12RF-ABDC01282065.1-ighv |(718, 1027)|2.99089600501|(0.995,1.000,0.996)|1
-VQCEVQLVESG-GGLVPPGGSLRLSCAASGFTF----SD--YWMSWIRQAPGKGL---E
WVGEING--DGGNT--NYADAMKGRFTISRDNSKNTLYLQ------MN-SLRAKDTAVYY
CGR-------
>V13RF-ABDC01296165.1-iglv |(3112, 3422)|2.7230190251|(0.971,0.903,0.892)|1
-SLSQPVVTQPP-SLSASPGASARLTCTLSSGFS---VGS--YAISWHQQKPGSPP---R
YLLYYH-T--DSNK--HQGSGVPSRFSGSKDASANAGILH------VS-GLQPEDEADYY
CAV-------
>V14RF-ABDC01296165.1-iglv |(8050, 8360)|2.99899600001|(1.000,1.000,0.999)|1
-SLANFVLTQPS-SVSGSPGQKVTISCTRSSGNI---G-S--NYVHWYQQRPGSAP---T
TVIYR-------DD--KRPSGVPDRFSGSSDSSSNSASLT------IS-GLQSEDEADYY
CQSYDASA--
>V15RF-ABDC01296166.1-iglv |(4596, 4906)|2.73507043402|(0.976,0.903,0.900)|1
-SLSQPVVTQPP-SLSASPGASARLTCTLSSGFS---VGS--YAISWHQQKPGSPP---R
YLLYYH-T--DSDK--HQGSGVPSRFSGSKDASANAGILH------VS-GLQPEDEADYY
CAV-------
>V17RF-ABDC01314388.1-ighv |(6282, 6597)|3.0|(1.000,1.000,1.000)|1
-VQCEVQLVESG-GGLVQPGGSLKLSCAASGLTF----SD--YWMSWIRQAPGKGL---E
WAGLNRSKAYGGIA--EYAASVKDRFTISRDDSKSTAYLQ------MN-SLKAKDTALYY
CVR-------
>V18RF-ABDC01318810.1-iglv |(15156, 15463)|2.98450011724|(0.998,1.000,0.987)|1
-SWAQSALTQPP-SVSGAPGETVTISCSGSSSNI---G-G--YDANWYQQLPGTAP---K
LLIYG-------NS--NRPSGVPARFSGSK--SGSSASLT------IA-GLQAEDEGDYY
CSSWDSSLS-
>V19RF-ABDC01318812.1-iglv |(1658, 1965)|2.79313531475|(0.997,0.926,0.916)|1
-SWAQSALTQPP-SVSGAPGQSVTISCLGSNSNI---G-G--NYANWYQQLPGTAP---K
TLIYA-------NS--NRPSGVPARFSGSK--SGSSASLT------IT-ELQAEDEADYY
CSAWDDSLS-
>V21RF-ABDC01342328.1-iglv |(12642, 12952)|2.94193283577|(0.998,0.995,0.956)|1
-SLANFFLTQPS-SVSGSPGQKVTISCTRSSGNI---G-S--NYVHWYQQRPGSAP---S
TVIYE-------YN--KRPSGVPDRFSGSMDSSSNSASLT------IS-GLQSEDEADYY
CQSYDGSY--
>V22RF-ABDC01347843.1-iglv |(8431, 8731)|2.87696800026|(0.959,0.961,0.957)|1
--SVASQPNQVP-AVSVALGQTASITCQGD--G----LRS--YYPGWYQQKPGQAP---V
LVFYG-------NN--KRPSGIPERFSGSK--SGNTAMLT------IS-GAQADDEADYY
CQTWDSTGTH
>V23RF-ABDC01347844.1-iglv |(5493, 5791)|2.7333986342|(0.974,0.839,0.992)|1
--SVASQLTQVP-AVSVALGQTARITCQGD--S----LRS--YYANWYQQKPGQAP---V
LLIYG-------DN--QRPSGIPERFSGSK--SGNTATLT------VS-GAQVEDEADYY
CGSYAGSGT-
>V24RF-ABDC01349227.1-iglv |(6289, 6580)|2.9719000027|(0.991,0.994,0.987)|1
--SVASQVTQVP-AVSVALGQTARITCQGD--S----LSS--YYPGWYQQKPSQAP---V
LVVYG-------NN--ERPSGIPERFSGSK--SGNTATLT------IS-GAQVEDEADYY
CGSYAGS---
>V25RF-ABDC01349230.1-iglv |(865, 1165)|3.0|(1.000,1.000,1.000)|1
--SVASQLTQVP-AVSVALGQTASITCQGD--G----LSS--DYANWYQQKPGQAP---V
LLIYG-------EN--QRPSGIPERFSSSD--SGDTATLT------IS-GAQAGDEADYY
CQVWDSENNK
>V26RF-ABDC01351831.1-igkv |(554, 852)|2.96294800078|(0.986,0.989,0.988)|1
-TRCDIQVTQSPSSVSASPGDTVTISCRASQDI------S--NRLSWYQQKPGKPP---K
ALIYV-------AS--NLHSGVSSRFSGSG--SGTDYSLT------IR-GLETDDAATYF
CRQYKIN---
>V27RF-ABDC01351832.1-igkv |(2497, 2812)|2.95320464967|(1.000,0.962,0.997)|1
-SSGDVVMTQTPVSLPVTPGEPASISCRSSQSLLHS-DGK--TYLYWYLQKPGQSP---Q
LLIYL-------GF--TRASGVPDRFSGSG--SGTDFTLK------IS-KVEAEDVGVYY
CMQAIQPP--
>V28RF-ABDC01351835.1-igkv |(461, 776)|2.98070483945|(1.000,0.982,1.000)|1
-SNGEIVMTQTPLSLPVTPGEPASISCRSSQSLLHS-DGN--TYLHWYLQKPGQSP---Q
LLIYR-------VS--NRFSGVPDRFSGSG--SGTDFTLK------IS-RVEAEDVGVYY
CMQGTQTP--
>V29RF-ABDC01351837.1-igkv |(5117, 5415)|2.91583600705|(0.975,0.970,0.971)|1
-TRCDIQVTQSPSSMSVSPGDTVTISCRASQDI------S--NRLSWYQQKPGKPP---K
PLIYV-------AS--NLHSGVSSRFSGSG--SGTDYSLT------IR-SLETDDAATYF
CRQYKNN---
>V30RF-ABDC01351837.1-igkv |(9264, 9579)|2.99092000218|(0.995,0.999,0.997)|1
-SSGDVVMTQTPLSLSVTPGESASISCRASQSIQDS-DGN--TYLNWFLQKPGQPP---R
RLIHK-------VS--NRDSGVSDGFSGSG--SGTDFTLK------IS-RVEAEDVGVYY
CMQASYFP--
>V31RF-ABDC01352111.1-iglv |(14382, 14693)|2.26396784759|(0.984,0.711,0.874)|1
-SWAQSALTQPP-SVSGAPGQSVTISCLGSSSNI---GGG--YVVHWYQQLPGTAP---K
LLIYG-------GS--GRPSGVPARFSGSK--SGSSASLT------IA-GLQAKDEADYY
CQSYDSSLDA
>V33RF-ABDC01359388.1-iglv |(1496, 1806)|2.97488623715|(1.000,0.977,1.000)|1
-SLANFVLTQPS-SVSGSPGQKVTVSCTRSSGNI---G-S--NYVYWYQQRPGSAP---T
TVIYR-------DD--QRPSGVPDRFSGSIDSSSNSASLT------IS-GLQSEDEADYY
CQSYDGSA--
>V34RF-ABDC01360510.1-igkv |(1890, 2205)|2.89057612196|(0.970,0.999,0.931)|1
-SSGDIVMTQTPLSLPVTPGEPASISCRSSQSLLHS-NGN--TYLQWYLQKPGQSP---Q
PLIYR-------VS--NRFSGVPDRFSGSG--AGTDFTLK------IS-RVEAADVGVYY
CMQGIQFP--
>V35RF-ABDC01360510.1-igkv |(9535, 9833)|2.82646662233|(0.919,0.938,0.992)|1
-IRCDIQMTQSPSSLAASPGETVTISCRASQGI------N--RNLAWYQHKPGNAP---K
RLIYG-------AS--NLQSGVSSRFSGSG--SGTDYSLT------IR-GLETDDVATYF
CHQYNSN---
>V36RF-ABDC01360510.1-igkv |(13925, 14240)|2.9296499344|(0.997,0.946,0.997)|1
-SRGDIVMTQTPVSLPVTPGEPASISCRSSQSLLHS-NGK--TYLQWFLQKPGQSP---Q
LLIYL-------GF--TRASGVPDRFSGSG--SGTDFTLK------IS-KVEAEDVGVYY
CMQTIQLP--
>V37RF-ABDC01360666.1-igkv |(4785, 5100)|2.99699200002|(0.999,0.998,1.000)|1
-SSGDIVMTQTPLSLPVTPGESASISCRSSQSLLHS-DGK--TYLQWFLQKPGQSP---Q
LLIYL-------GF--TRASGVPDRFSGSG--SGTDFTLK------IS-KVEAEDVGVYY
CMQTIQFP--
>V38RF-ABDC01360670.1-igkv |(1063, 1378)|2.61789289951|(0.942,0.795,0.966)|1
-SSGDIVMTQTPLSLPVTPGEPASISCRASESLLDS-DGK--TYLYWFLQKPGQPP---R
RLIYQ-------VS--NRDSGVSDRFSGSG--SGTDFTLK------IS-RVEAEDVGVYY
CAQATKLP--
>V40RF-ABDC01373300.1-ighv |(1180, 1481)|2.96886891211|(1.000,0.972,1.000)|1
-VQCEVQLVESG-GGLVQPGGSLRLSCVASGFTL----TS--YGMNWVRQAPGKGL---E
WISYIYS----SST--SYADSVKGRFTISTDNGKNTLYLQ------MN-SLRAEDTAMYY
CA--------
>V41RF-ABDC01373301.1-ighv |(8478, 8785)|2.99899600001|(1.000,1.000,0.999)|1
-VQCEVQLVESG-GGLVQPGGSLRLSCAASGFTF----SS--YYMHWVRQAPGKGL---E
WVSRINP--DGGST--IYADAVKGRFTISRDNSKNSLYLQ------MN-SLKAEDTAVYY
CA--------
>V42RF-ABDC01375549.1-ighv |(174, 483)|3.0|(1.000,1.000,1.000)|1
-VQCEVQLVESG-GGLVQPGGSLRLSCAASGFTF----SS--YWMNWVRQAPGKGL---E
WVADING--DGGST--NYADAVKGRFTISRDNAKNSLYLQ------MN-SLRAEDTALYY
CAT-------
>V43RF-ABDC01375549.1-ighv |(8525, 8840)|2.99798400013|(1.000,1.000,0.998)|1
-VQCEVQLVESG-GGLVQPGGSLKLSCVASGFTF----SD--YYMHWVRQAPGKGL---E
WVAFIRNKANGGTA--EYAASVKGRFTISRDDSKSTAYLQ------MN-SLRTEDTAVYY
CER-------
>V44RF-ABDC01377237.1-ighv |(8637, 8946)|3.0|(1.000,1.000,1.000)|1
-VQCDVQLVESG-GGLVQPGGSLRLSCAASGFTF----SS--YWMYWVRQAPGKGL---E
WVSAISG--NGGST--YYADAVKGRFTISRDNGKNTLYLQ------MN-SLKAEDTAVYY
CAR-------
>V45RF-ABDC01377653.1-trav |(1660, 1950)|2.98342008525|(0.989,0.998,0.997)|1
-MSRGEKLEQS-PFLSVQEGDSSVINCTYTETT------S--TYFYWYKQGPREGL---Q
LIMTIF-S--YED------KKQERRLSVLLNKMEKHLSLH------IS-DTQPADSAVYF
CAVS------
>V46RF-ABDC01377655.1-trav |(2230, 2518)|2.75637901594|(0.899,0.916,0.955)|1
--VHSQKIEQNPWALSIQEGETAAVTCNYTSYS------P--AFFQWYRQDPEKGL---V
FLLLIR-E--NEG------EKQEGRLKVTFDTKLKQSSFY------IA-DSQPADSAAYL
CAA-------
>V48RF-ABDC01379531.1-trav |(895, 1198)|2.98521630725|(1.000,0.986,1.000)|1
-SGMAQKVTQSQPAMWVQEKEAVTLDCTYDTRD-----ST--YYLFWYKQPSSGEM---I
LLIRQD-S--YNQ-----QNATEGRYSLNFQKASKSIKLV------IS-ASQVGDSAIYF
CALSE-----
>V49RF-ABDC01379531.1-trav |(6655, 6946)|2.99899200002|(0.999,1.000,1.000)|1
VRSQQKEVDQTPEFLSVSEGAMASLNCTYSNTA------S--RYFFWYRQYSGKGP---E
LLVSIF-S--TGD------K-QEGRFTAQLNKASRYVSLV------IR-DSQPSDSATYL
CAL-------
>V50RF-ABDC01384523.1-iglv |(1675, 1975)|3.0|(1.000,1.000,1.000)|1
--SVASQLTQVP-AVSVALGQTASITCQGD--G----LSS--DYANWYQQKPGQAP---V
LLIYG-------EN--QRPSGIPERFSSSV--SGDTATLT------IS-GAQAGDEADYY
CQVWDSENNK
>V51RF-ABDC01388284.1-trav |(3312, 3602)|2.97548806553|(0.992,0.984,1.000)|1
-VRSQQVVEQTPESLVVSEGTTASLSCTYSDTA------S--QSFLWYRQYSGKGP---E
LLMFIY-S--TGD------K-EEGRFTAQLNKASRNVSLL------IR-DSQPSDSATYL
CAVS------
>V52RF-ABDC01388284.1-trav |(7133, 7430)|2.84148712253|(0.957,0.932,0.955)|1
-GTWAQRVTQPDGHITVSEGDPLELRCNYSSSV-----S---PYLFWYVQYPNQGL---E
LLLKYT-S--GNS-----LVTGIKSFKAEFNKGETSFHLK------KA-SAHLSDSAQYF
CAVS------
>V54RF-ABDC01391612.1-ighv |(2185, 2509)|2.9429280013|(0.983,0.980,0.980)|1
-AHSEVQLVQSG-AEVKPPGASVKVSCKASGYTF----TS--YAMHWVRQAPGQGL---E
YMGWINT--NTGGT--SYAQKFQGRVTMTRDTSTSTAYME------LS-SLRPEDTAVYY
CARDTVLQ--
>V56RF-ABDC01394567.1-igkv |(5428, 5726)|2.98285201038|(0.996,0.990,0.997)|1
-TRCDIQMTQSPSSVSASPGETVTISCRASQGI------N--NNLVWYQHKPGKPP---K
SLIYG-------AS--NLYPGVLSRFSGSG--SGTDYSLT------IR-GLETDDAATYY
CQQYNSF---
>V57RF-ABDC01394567.1-igkv |(9543, 9858)|2.95556408064|(0.983,0.980,0.993)|1
-SSGDVVMTQTPLSLPVTPGESVSITCRASQSLQDS-DGN--TYLNWVLQKPGQPP---K
RLIYK-------VS--NGDNGVSDRFSGSG--SGTDFTLK------IS-RVEAEDVGVYY
CMQASYFP--
>V58RF-ABDC01396012.1-igkv |(1397, 1712)|2.97317355698|(1.000,0.979,0.996)|1
-SSGEIVMTQSPLSLPVTPGEPASISCRSSQSLLHS-NGN--TYLQWFLQKPGQSP---Q
LLIYL-------GF--TRASGVPDRFSGSG--SGTDFTLK------IS-RVEAEDVGVYY
CMQAIQYP--
>V59RF-ABDC01398089.1-iglv |(1263, 1573)|2.74091362368|(0.974,0.927,0.882)|1
-SLANLVLTQPS-SVSGSPGQKVTISCTRSSGDI---G-G--YYVHWHQQRPGSAP---T
TVIYE-------DN--ERPSGVPDRFSGSIDSSSNSASLT------IS-GLQSEDEADYY
CQSYDDSC--
>V60RF-ABDC01398089.1-iglv |(8544, 8868)|2.84631908855|(0.973,0.933,0.949)|1
-SLSQPVLTQPP-SLSASLGASAGLTCTLSSGTV---VGG--YHISWYQQKPGGPP---R
YLLRYY-S--DSDK--HQGSGVPSHFSGSKDASANAGILQ------VS-RLQPEDEADYY
CMTYHANS--
>V61RF-ABDC01399103.1-trbv |(74, 387)|2.79647384997|(0.970,0.892,0.959)|1
--PLDTAVFQTPKYLLTQTGNDVSLKCEQTLGY---------DTMYWYKQDSTKLL---K
IMFIYS-N--KEKI---LNETASNRFSPESPD-KAHLNLH------IN-SPEPGDSAVYL
CASSYDTALQ
>V62RF-ABDC01399713.1-iglv |(4883, 5179)|2.94317665107|(0.997,0.959,0.993)|1
-SWAQSALTQPP-SVSGAPGQSVTISCSNIK--------G--SYAHWYQQLPGTAP---K
LLIYY-------NS--DRASGVPARFSGSK--SGSSASLT------IA-GLQAEDEADYY
CQSYDSSLDA
>V64RF-ABDC01405197.1-trbv |(132, 429)|2.46420625656|(0.786,0.962,0.848)|1
--HVGAMVMQNPRYQVTRVGKTVTLSCSQNMNH---------DTMYWYQQKLSQAP---K
LLFYYY-D--TEF---NNETDTSYNFQPSRPN-TSFSSVD------IR-SPGLGDSAVYL
CASSR-----
>V65RF-ABDC01407894.1-ighv |(4990, 5305)|3.0|(1.000,1.000,1.000)|1
-VQCEVQLVESG-GGLAQPGGSLRLSCAASGFTF----SD--YYMSWVRQAPGKGL---E
WVGFIRNKANGGTA--EYAASVKGRFTISRDDSKSTTYLQ------MN-SLRAEDTALYY
CAR-------
>V67RF-ABDC01417489.1-ighv |(3793, 4108)|3.0|(1.000,1.000,1.000)|1
-VQCEVQLVESG-GGLAQPGGSLRLSCAASGFTF----SD--YYMNWVRQAPGKGL---E
WVGVIRNKANGGTA--EYAASVKGRFTISRDDSKSTAYLQ------MN-SLRAEDTALYY
CAR-------
>V68RF-ABDC01417539.1-iglv |(3342, 3652)|2.97840127932|(1.000,1.000,0.980)|1
-SLANIVLTQPS-SVSGSPGQKVTLSCTRSSGDI---G-S--SYVSWYQQRPGSAP---T
TVIYE-------DN--ERPSGVPDRFSGSIDSSSNSASLT------IS-ALQSEDEADYY
CQSYDDSY--
>V69RF-ABDC01418168.1-iglv |(580, 890)|2.30089034063|(0.978,0.690,0.926)|1
-SLSQPVVTQPP-SLSASPGASARLTCTLRSDIS---VGG--KDMYWYQQKPGSPP---R
YLLYYY-S--DSNK--HQGSGVPSRFSGSKDASANAGILH------VS-GLQPEDEADYY
CAV-------
>V70RF-ABDC01418168.1-iglv |(5505, 5817)|2.98874002125|(1.000,0.996,0.993)|1
-SLANLVLTQPS-SVSGSPGQKVTISCTRSSGDI---G-D--AYVTWYQQRPGSAP---T
TVIIG-------DD--QRPSRVPDRFSGSIDSSSNSASLT------IS-GLQSEDEADYY
CQSYGIRNS-
>V71RF-ABDC01418428.1-trav |(328, 621)|2.98694800078|(0.994,0.996,0.997)|1
-VRGGENVGLHPPTLSVQEGDTSVINCSYSDSA------S--SYLLWYKQKLGKSP---Q
SIIDIR-S--NMG------KKQKGRFTVFLSKTAKHLSLH------IA-ATQPGDSAVYF
CAES------
>V72RF-ABDC01421861.1-ighv |(7067, 7376)|2.99498000014|(0.998,0.997,1.000)|1
-VQCEVQLLESG-GGLVQPGGSLRLSCAASGFTF----SS--YYMSWVRQAPRKGL---E
WVSYING--DGGYT--NYADAVKGRFTISRDNSKNSLYLQ------MN-NLKAEDTAMYY
CAR-------
>V73RF-ABDC01422153.1-iglv |(2569, 2876)|2.99799600001|(0.999,1.000,0.999)|1
-SWAQSALTQPP-SASGAPGQSVTISCSGSSSNI---G-G--NYANWYQQLPGTAP---K
LLIYG-------NS--DRPSGVPARFSGSK--SGSSASLT------IA-GLQAEDEGDYY
CSSWDDSLS-
>V74RF-ABDC01423814.1-ighv |(3316, 3625)|3.0|(1.000,1.000,1.000)|1
-VQCEVQLVESG-GGLVQPGGSLRLSCAASGFTF----SS--YAMSWVRQAPGKGL---E
WVSTISN--GGGST--YYTDAVKGRFTISRDNSKNSLYLQ------MN-SLRAEDTALYY
CAR-------
>V77RF-ABDC01440241.1-trav |(2301, 2594)|2.86338645581|(0.951,0.932,0.987)|1
-VRGGENVGLHPPTLSVQEGDTSVINCSYSNSA------S--IYFSWYKKELGKGP---Q
FIIDIR-S--NRD------KKEEQRFTIFVNKTVKHLSLH------IA-GTQPGDSAVYF
CAES------
>V79RF-ABDC01442374.1-iglv |(1223, 1533)|2.99280401921|(1.000,0.993,1.000)|1
-SLTNLVLTQPN-SVSGSPGQKVTISCTRSTGSI---G-G--YFVHWYQQRPGSAP---T
TVIYA-------DD--QRPSGVPDRFSGSIDSSSNSASLT------IS-GLQSEDEADYY
CQSYDDSY--
>V81RF-ABDC01446518.1-igkv |(1290, 1603)|2.88615356499|(0.996,0.987,0.924)|1
-SSGDVVMTQTPLSLPVTPGESASISCRASQSLLYS-DGN--TYLNWFLQKPGQPP---K
LLIYK-------IS--NRDSGVSDRFSGSG--SGTDFTLK------IS-RVEAEDVGVYY
CTQGTKL---
>V82RF-ABDC01449636.1-iglv |(4939, 5239)|2.99699200002|(0.999,0.998,1.000)|1
--SVASQLTQVP-AVSVALGQTARITCQGD--S----LSS--YYPNWYQQKPGQAP---V
LLIYG-------EN--QRPSGIPERFSSSV--SGDTATLT------IS-GAQAGDEADYY
CQVWDSENNK
>V83RF-ABDC01454767.1-ighv |(1191, 1500)|3.0|(1.000,1.000,1.000)|1
-VQCEVQLVESG-GGLVQPGGSLRLSCAASGFTF----SS--YWMNWVRQAPGKGL---E
WVADING--DGGST--NYADAVKGRFTISRDNAKNSLYLQ------MN-SLRAEDTALYY
CAT-------
>V84RF-ABDC01466438.1-iglv |(4568, 4875)|2.99799600001|(0.999,1.000,0.999)|1
-SWAQSALTQPP-SASGAPGQSVTISCSGSSSNI---G-G--NYANWYQQLPGTAP---K
LLIYG-------NS--DRPSGVPARFSGSK--SGSSASLT------IA-GLQAEDEGDYY
CSSWDDSLS-
>V85RF-ABDC01472745.1-igkv |(710, 1025)|2.37748450958|(0.890,0.734,0.852)|1
-SSGDVVMTQTPLSLPVTPGELASISCRASESLLYS-DGN--TYLNWFVQKPGQPP---K
RLIYK-------VS--NRDNGVSDRFSGSG--SGTDFTLK------IS-RVEAEDVGVYY
CVQGTKLP--
>V90RF-ABDC01491653.1-trav |(356, 647)|2.99899200002|(0.999,1.000,1.000)|1
VRSQQKEVDQTPEFLSVSEGAMASLNCTYSNTA------S--RYFFWYRQYSGKGP---E
LLVSIF-S--TGD------K-QEGRFTAQLNKASRYVSLV------IR-DSQPSDSATYL
CAL-------
>V92RF-ABDC01497734.1-trdv |(531, 837)|2.97156408064|(0.993,0.996,0.983)|1
-STVAQKVTQVETARSTTVGAVVTLNCQYETSGG----AY--FFIFWYKQLPSKEM---I
FLLRQG-S--DLY-----NAKDDQRYSVNFQEEANSIDLT------IS-ALRLEDSAKYF
CALAE-----
>V93RF-ABDC01498106.1-iglv |(348, 644)|2.94317665107|(0.997,0.959,0.993)|1
-SWAQSALTQPP-SVSGAPGQSVTISCSNIK--------G--SYAHWYQQLPGTAP---K
LLIYY-------NS--DRASGVPARFSGSK--SGSSASLT------IA-GLQAEDEADYY
CQSYDSSLDA
>V95RF-ABDC01522041.1-igkv |(82, 382)|3.0|(1.000,1.000,1.000)|1
-ARCDIQMTQSPSSLAASVGDTVTISCRASQGI------S--SWLSWHQQKPGKPP---K
TLINK-------AS--NLESGVPSRFSGSG--SGTDFTLT------IK-GLQPEDFATYY
CQQYDSSP--
>V96RF-ABDC01523330.1-igkv |(1251, 1566)|2.95444567112|(0.998,0.969,0.991)|1
-SSGEIVMTQSPLSLPVTPGEPASISCRSSQSLLHS-NGN--TYLYWFLQKPGQSP---Q
PLIYL-------VS--NRFSGVSDRFSGSG--SGTDFTLK------IS-RVEAEDVGVYY
CMQDLQTP--
>V98RF-ABDC01527872.1-trbv |(327, 624)|2.93192000218|(0.978,0.974,0.980)|1
--PLDTAVFQTPKYLLTQTGNNVSLKCGQTLGH---------DNMYWYKQDATKLL---K
IMFSYN-N--QELM---VNETASNRFSPESPD-KAHLNLH------IN-SPEPGDSAVYL
CASSD-----
>V99RF-ABDC01533414.1-trav |(231, 518)|2.84014322342|(0.930,0.947,0.971)|1
--VNSQQGEENLQALSIQEGENATINCSYTSS-------I--NNLQWYRQDAGRGP---T
LLILIR-A--NKR------EERHGRLTATLNPSIKSSSLI------IT-ASCAADTATYF
CATD------
>V100RF-ABDC01533415.1-trav |(1221, 1515)|2.99089600501|(0.995,0.996,1.000)|1
-GTDGDSVTQTEGPVTLPEGEALTLNCTYQSNY-----A---AFLFWYVQFQNKEP---E
LLLKSS-S--ETQ------ETDGRGFQANNNKSDSSFHLK------KP-SVQLSDSAVYF
CAMR------
>V101RF-ABDC01542818.1-trav |(328, 615)|2.98567205249|(0.998,0.989,0.999)|1
-VSSEDKVVQSPPSMAVHEGDSATLTCNYVVSY------F--RSLQWYKQEK-NAP---V
FLFTLT-S--SGI------EKKSGRFSSILDN-KELSTLN------IT-ATQTGDSAIYF
CAVE------
>V102RF-ABDC01556235.1-iglv |(1158, 1468)|2.52809123569|(0.954,0.903,0.787)|1
-SLSQPVVTQPP-SLSASPGASARLTCTLSSGFS---VGS--YAISWHQQKPGSPP---R
YLLYYH-T--DSDK--HQGSGVPSRFSGSKDALANAGILH------VS-GLQPEDEADYY
CAV-------
>V103RF-ABDC01570800.1-iglv |(151, 463)|2.91353455004|(0.983,0.993,0.944)|1
-SLANLVLTQPS-SVSGSPGQKVTISCTRSSGDI---G-D--AYVNWYQQRPGSAP---T
TVIYG-------DD--QRPPRVPDRFSGSIDSSSNSASLT------IS-GLQSEDEGDYY
CQSYGIRNS-
>V104RF-ABDC01583217.1-igkv |(589, 904)|2.99494800078|(1.000,0.998,0.997)|1
-SSGDIVMTQTPLSLPVTPGEPASISCRSSQSLLHS-DGK--TYLYWYLQKPGQSP---Q
LLIYL-------GF--TRASGVPDRFSGSG--SGTDFTLK------IS-KVEAEDVGVYY
CMQTIQLP--
>V106RF-ABDC01599688.1-igkv |(938, 1236)|2.65514209499|(0.988,0.997,0.801)|1
-IRCDIQMTQSPSSLAASPGETVTISCRASQGI------S--NYLSWYQQKPGKPP---K
SLIYG-------AS--NLHSGVSSRFSGSG--SGTDYSLT------IR-GLETDDAATYY
CQQGHSY---
>V107RF-ABDC01281089.1-trbv |(2653, 2950)|2.83104157414|(0.949,0.956,0.928)|-1
--PMDTGVTQTPRHLVMGMTDKKSLECGQNLEH---------NAMYWYKQSAKKAL---E
PLFIFN-Y--KKLY---ENVTVPSRFTPEYQD-NAHFYLH------LD-ALQPEDSATYL
CASSQ-----
>V109RF-ABDC01281094.1-trbv |(2622, 2919)|2.95636106127|(0.990,0.971,0.997)|-1
--PLDTAVFQTPKYLLTQTGNDVSLKCEQTLGH---------NSMYWYKQDSTKLL---K
IMFSYN-N--QEKI---LNETASNRFSPESPD-KAHLNLH------IN-SPEPGDSAVYL
CASSD-----
>V110RF-ABDC01281096.1-trbv |(2097, 2394)|2.93094425777|(0.985,0.991,0.958)|-1
--PTDTGVTQTPRHLVMGMTDKKSLKCHQNLGH---------NAMYWYKLSAKKPP---E
LMFYYY-Y--QAL---RENMTVPSRFSPECPD-NSHLYLH------LD-ALQPEDSATYL
CASSQ-----
>V111RF-ABDC01281097.1-trbv |(3192, 3492)|2.97270402421|(0.995,0.988,0.990)|-1
--HTEPGVIQTPSHQVTKKGQEVILRCDPISGH---------LYFYWYRQISGQKL---E
FLVSFY-N--DNIS--EKSELFTDQFSLKRPK-GSYLALK------IQ-STELEDSAMYF
CASSK-----
>V112RF-ABDC01281097.1-trbv |(8780, 9077)|2.93596000066|(0.978,0.977,0.981)|-1
--PLDTAVFQTPKYLLTQMGNNVALKCGQTLGH---------DYMYWYKQDSTKLL---K
IMFTYN-N--QELM---LNETASNRFSPESPD-KAHLNLH------IN-SPEPGDSAVYL
CASSD-----
>V113RF-ABDC01345813.1-ighv |(1734, 2043)|2.99696400065|(1.000,1.000,0.997)|-1
-VRCEVQLVESG-GGLVQPGGSLRLSCAASGFTF----SS--YGMHWVRQAPGKGL---E
WVAVIRY--DGSKQ--YYADAVKGRFTISRDNSKNMLYLQ------MN-SLKVEDTAMYY
CAK-------
>V114RF-ABDC01345814.1-ighv |(4248, 4551)|2.95163747374|(0.997,0.964,0.995)|-1
-VQCDVQLVESG-GGLVQPGGSLRLSCAASGFTL----SS--YGMNWVRQAPGKGL---E
WVSYIYS----SST--YYADSVKGRFTTSRENSQNMLYLQ------MN-SLRDEDTAMYY
CAR-------
>V115RF-ABDC01345817.1-ighv |(603, 906)|2.99294800078|(0.998,1.000,0.995)|-1
-VQCEVQLVQSG-GGLVQPGGSLRLSCAASGFTF----SS--YGMNWVRQAPGKGL---E
WVSYIYS----SST--YYADSVKGRFTTSRENSQNMLYLQ------MN-SLRDEDTAMYY
CAR-------
>V116RF-ABDC01358932.1-igkv |(615, 919)|2.9341507773|(0.998,0.959,0.984)|-1
-SSGDIVMTQTPLSLPVTLGEPASISCRSSQSLLHS-DGN--SYMCWYLQKPGQSL---Q
PLIYR-------VS--NRFSGVPDRFSGSG--SGTDFTLK------IS-RVEAEDVGVYY
CMQD------
>V118RF-ABDC01368596.1-trbv |(1048, 1348)|2.80285601818|(0.945,0.953,0.910)|-1
--HTDAGVIQTPRHEVTEMGQAVTLKCEPISGH---------DTLLWYKQTLVQGL---E
LLTYFR-S--QSQI--DDAGMPKGRFSAEMPN-ASFSTLK------IQ-PTELRDSAVYL
CASSS-----
>V119RF-ABDC01368601.1-trbv |(2109, 2406)|2.97591252616|(0.999,0.983,0.995)|-1
--SVTAGVTQTPRFQILKTGQNMTLMCTQDTNH---------DSMYWYRQDPGLGL---R
LIHYSV-A--AGTT---ARGDIPEGYNVSRSS-TETFSLT------ME-SATPSQTSAYF
CASSE-----
>V122RF-ABDC01396906.1-ighv |(901, 1210)|3.0|(1.000,1.000,1.000)|-1
-VQCEVQLVESG-GGLVQPGGSLRLSCAASGFTF----DY--YGMNWVRQAPGKGL---E
WVSYISW--NGGST--YYADAVKGRFTISRDNSKNMLYLQ------MN-SLRAQDTAVYY
CAR-------
>V124RF-ABDC01418360.1-iglv |(1917, 2229)|2.91291054075|(0.985,0.968,0.963)|-1
--SVAFQLTQVP-AVSVALGQTASITCQGE--G----LSS--YYVNWYQQKPGQAP---V
LIIYTD-I--FSNS--NRPSGIPERFSSSV--SGDTATLT------IS-GAQAQDEADYY
CQVWVSENNK
>V125RF-ABDC01419594.1-ighv |(2167, 2474)|2.28054646452|(0.979,0.996,0.653)|-1
-AHSQVQLVQSG-AEVKPPGASVKVSCKASGYTF----TS--YYMHWVRQTPGQGL---E
WMGEINP--NSGGT--SYAQKFQGRVTMTRDTSTSTAYME------LS-SLRPDDTAVYY
CA--------
>V126RF-ABDC01425625.1-iglv |(109, 419)|2.9455717188|(1.000,1.000,0.954)|-1
-SLANFVLTQPS-SVSGSPGQKVTISCTRSSGNI---G-S--YYVQWYQQRPGSAP---S
TVIYK-------HN--KRPSGVPDRFSGSIDSSSNSASLT------IS-GLQSEDEADYY
CQSYDGSY--
>V127RF-ABDC01454736.1-trav |(1674, 1968)|2.9939280013|(0.996,0.999,0.999)|-1
-RTHGNSVTQTEGQVTLSEKAFLHINCTYTSTG-----Y---PSLFWYVQYPGEGP---Q
LLLKAA-T--AND------KGMNKGFEATYKKETTSFHLE------KA-SVHESDSAVYY
CAMS------
>V128RF-ABDC01455982.1-trbv |(239, 546)|2.81870011863|(0.997,0.995,0.880)|-1
--HTDAGITQNPRHKITEIGKQVTLSCHQNDNH---------FYMYWYRQDLGHGL---R
LIYYSV-D--AQST---DKEEVAEGYKVSRSN-KEDFLLF------LE-SATRSQTSVYF
CASSEYTA--
>V129RF-ABDC01465190.1-iglv |(381, 691)|2.97488623715|(1.000,0.977,1.000)|-1
-SLANFVLTQPS-SVSGSPGQKVTVSCTRSSGNI---G-S--NYVYWYQQRPGSAP---T
TVIYR-------DD--QRPSGVPDRFSGSIDSSSNSASLT------IS-GLQSEDEADYY
CQSYDGSA--
>V130RF-ABDC01471087.1-ighv |(643, 952)|2.99899600001|(1.000,1.000,0.999)|-1
-VQCEVQLVESG-GGLVQPGGSLRLSCAASGFTF----SD--YWMNWVRQAPGKGL---E
WVAHIRY--DGSKQ--YYADAVKGRFTISRDNSKNSLYLQ------MN-SLRAEDTALYY
CAR-------
>V131RF-ABDC01473376.1-trbv |(205, 505)|2.98192000218|(0.996,0.994,0.992)|-1
--SYDAKVTQTPGHLIKEKGQKASMDCTPQQGH---------NSLYWYQQSQNKEL---E
FLVYFE-N--KELF--DQTEMHKKRFSSKCPP-DSPCRLE------IL-SSEPGDSALYF
CASSP-----
>V133RF-ABDC01493416.1-ighv |(429, 735)|3.0|(1.000,1.000,1.000)|-1
-VQCDVQLLESG-GGLVQPGGSLRLSCAASGFTL----SS--YYMHWVRQAPGKGL---E
WVSTISS---GGST--YYADAVKGRFTISRDNGKSSLYLQ------MN-SLKAEDTAVYY
CAR-------
>V134RF-ABDC01537099.1-igkv |(1719, 2017)|2.95283600705|(0.984,0.989,0.980)|-1
-TRCDIQVTQSPSSVSASPGDTVTISCRASQDI------S--NRLSWYQQKPGKPP---K
ALIYV-------AS--NLHSGVSSRFSGSG--SGTDYSLT------IR-GLETDDAATYF
CRQYKNN---
>V135RF-ABDC01540867.1-iglv |(1970, 2280)|2.99696400065|(1.000,0.997,1.000)|-1
-SLANFVLTQPS-SVSGSPGQKVTISCTRSSGNI---E-S--SYVHWYQQRPGSAP---T
TVIYD-------DN--ERPSGVPDRFSGSIDSSSNSASLT------IS-GLQSEDEADYY
CQSYDASA--
>V136RF-ABDC01560090.1-trbv |(258, 558)|2.98993200206|(0.995,0.999,0.996)|-1
--SMDTEVTQSPRYLVKGKEQKTKMDCVPKKGH---------SYVYWYQKKLEEGL---K
FLVYLQ-D--EDII--EKEEIINNRFSAQCPK-NSPCILE------IQ-STESGDSALYF
CASSQ-----
>V137RF-ABDC01562688.1-igkv |(1193, 1508)|2.99493200206|(1.000,0.996,0.999)|-1
-SSGDIVMTQTPLSLPVTPGETASISCRASQSIQYS-DGN--TYLNWFLQKPGQPP---K
RLIYK-------VS--NRDSGVSDRFSGSG--SGTDFTLT------IS-RVEAEDVGVYY
CMQASYYP--
>V138RF-ABDC01582683.1-iglv |(809, 1119)|2.68624208632|(0.988,0.960,0.833)|-1
-SLSQPVLTQPS-SLSASPGASARLTCTLSSGSS---VGS--YWINWYQQKPGSPP---R
YLLSYY-S--DSYK--HQVSGVPSRFSGSKDASANAGILH------VS-GLQPEDEADYY
CAV-------
>V139RF-ABDC01624510.1-iglv |(99, 409)|2.99696400065|(1.000,0.997,1.000)|-1
-SLANFVLTQPS-SVSGSPGQKVTISCTRSSGNI---E-S--SYVHWYQQRPGSAP---T
TVIYD-------DN--ERPSGVPDRFSGSIDSSSNSASLT------IS-GLQSEDEADYY
CQSYDASA--
>V0RF-JYKQ01003191.1-trgv |(1259, 1575)|2.9548997325|(0.998,0.988,0.972)|1
-SQKSSNLEGRTKSVTRPTGSSAEITCDLPEV------SS--FYIHWYLHQEGKAP---Q
RLLYYD-S--SNSRVVLESGISSGKYDSYGSTRRRNLRLR------LQ-NLIENDSGVYY
CANWD-----
>V1RF-JYKQ01003191.1-trgv |(5603, 5916)|2.96640647223|(1.000,1.000,0.970)|1
-GQKSSNLEGITKSVTRPTGSSAEITCDFSGD------SN--FYIHWYLHQEGKVP---Q
RLLYYD-V--SNSRDVLESGLSPGKYYTHT-RTRWSWILI------LR-NLIENDSGVYY
CANWD-----
>V2RF-JYKQ01005758.1-ighv |(2900, 3215)|2.9868400105|(0.997,0.991,0.999)|1
-VKCEAQLMESG-GGLVQPGGSLRLSCAASGFTF----SS--YGMSWVHQTPGKGL---E
WVGLIRNKADGETT--DYAASVKGRVTISRDDSKSITSLQ------MN-NLKTEDTAVYY
CAR-------
>V3RF-JYKQ01005763.1-ighv |(2160, 2469)|2.96008424741|(0.997,0.970,0.996)|1
-VQCEVQLVESG-GGLVQPGASLRLCCAASGFTF----SS--TRMNWIRQSPGKKL---E
WVADIKY--DGSEK--YYVDSVKGRFTISRDNAKNSLYLQ------MN-SLRAEDTAVYY
CVR-------
>V4RF-JYKQ01005763.1-ighv |(9395, 9701)|2.40136199755|(0.953,0.990,0.696)|1
-VCAEVQLVQSG--EVKRPGESLRISCKTSGYSF----TS--SWISWVRQMPGKGL---E
WMGMIYP--GDSDT--RYSPSFQGHVTISADKSISTVHLQ------WS-SLKASDTATYY
CAK-------
>V5RF-JYKQ01005769.1-ighv |(5096, 5411)|2.91921519324|(0.945,1.000,0.997)|1
-VQCEVQLVESG-GGLAQPGGSLRLSCAASGFTF----SD--HYMDWVRQAPGKGL---E
WVGRIRNKANGYTT--EYAASVKGRFTISRDDSKNTLYLQ------MS-SMKTEDTAVYH
CAR-------
>V6RF-JYKQ01005770.1-ighv |(7257, 7566)|2.99798400013|(1.000,0.998,1.000)|1
-VQCEVQLVESG-GGLVQPGRSLRLSCATSGFTF----SN--YWMFWVRQAPGKGL---E
WVSSISG--SSSST--YYPDSVKGRFTISRDNAKNMLYLQ------MN-SLRAEDTAVYY
CAR-------
>V7RF-JYKQ01005771.1-ighv |(8999, 9305)|2.77902751466|(0.940,0.878,0.984)|1
-VQCEVQLVEYG-GGLVQRGGSLRLSC---GFTF----SV--HFMSWVHQAPAKGL---E
WVGFMRNKANGGTT--EYATSVKGRSTISRADSKSMASLQ------MS-SLNTEDTAVYY
CAR-------
>V9RF-JYKQ01005772.1-ighv |(36472, 36781)|2.99293600205|(0.999,0.995,0.999)|1
-VQGEVQLVESG-GGLAKPGGSLRLSCAASGFTF----SS--YWMHWVRQAPGKGL---E
WISAINS--AGSSI--YYADSVKGRFTISRENAKNTLYLQ------MN-SLRAEDTAVYY
CAK-------
>V10RF-JYKQ01005773.1-ighv |(3691, 4000)|2.89793291531|(0.982,0.955,0.965)|1
-VQCEVQLVESG-GGSIQPGASLRLCCAAPGFTF----SS--TRMNWIRQAPGKKL---E
WVADIKY--DGSEK--YYVDSVKGRFTISRDNAKNSLSLQ------MN-SLRAEDTAVYY
CVR-------
>V11RF-JYKQ01005773.1-ighv |(11326, 11632)|2.97550011724|(0.989,1.000,0.987)|1
--CAEVQLVQSG-AEVKRPGESLRISCKTSGYSF----TS--NWISWVRQMPGKGL---E
WMGMIDP--SDSDT--RYSPSFQGQVTISADKSISTTYLQ------WS-SLKASDSATYY
CAK-------
>V12RF-JYKQ01005774.1-ighv |(1635, 1941)|2.97550011724|(0.989,1.000,0.987)|1
--CAEVQLVQSG-AEVKRPGESLRISCKTSGYSF----TS--NWISWVRQMPGKGL---E
WMGMIDP--SDSDT--RYSPSFQGQVTISADKSISTTYLQ------WS-SLKASDSATYY
CAK-------
>V13RF-JYKQ01005774.1-ighv |(20410, 20718)|2.85461113875|(0.995,0.915,0.972)|1
-VQGGVQLVESE-GNFVQPGGSLRLSCAVSGFTF----SS--YDLDWIRHAPGKGL---E
WVSGISI---AGST--YYANSVKGRFAISIDNAKNTLYLQ------MN-SLIAEDTAIYY
CVSE------
>V14RF-JYKQ01005774.1-ighv |(31522, 31837)|3.0|(1.000,1.000,1.000)|1
-VQCEVQLVESG-GGLVQPGGSLRLSCAASGFTF----SN--YWMNWVRQAPGKGL---E
WVGFIKNKADGGTA--AYAESVKGRFTISRDDSKNTLYLQ------MN-SLKTEDTAVYY
CTR-------
>V15RF-JYKQ01005777.1-ighv |(21925, 22238)|2.96586891211|(0.999,0.999,0.971)|1
-VQCEVQLVESR-GGLVQPGGSLRLSCAASGFTF----SD--YYMHWVRQAQGKGL---E
WVGLIRNKANSYTT--EYAAAVKGRFTISRDDSKNTLYLQ------MS-SLKTEDTALYY
CT--------
>V16RF-JYKQ01005777.1-ighv |(46860, 47174)|2.90761294488|(0.977,0.949,0.985)|1
-VFSQVTLKESG-PALVKPTQTLTLTCTFSGFSL----STSGMRVSWVRQPPGKAL---E
WLARIDW---DDDK--YYSTSLKSRLTISKDTSKNQVVLT------MT-NMDPVDTATYY
CARG------
>V17RF-JYKQ01005784.1-ighv |(1524, 1833)|3.0|(1.000,1.000,1.000)|1
-VQCEVQLVESG-GGLIQPGGSLRLSCAASGFTF----SS--YYMYWIRQAPGKGL---E
WVSAINT--GGGST--WYADSVKGRFTISRENAKNTLYLQ------MN-SLRAEDTAVYY
CAK-------
>V18RF-JYKQ01005787.1-ighv |(1654, 1969)|3.0|(1.000,1.000,1.000)|1
-VQCEVQLVESG-GGLVQPGGSLRLSCAASGFTF----SD--HYMDWVRQAPGKGP---E
WVGFIRNKARGGTA--EYAASVKGRFTISRDDSKNVTYLQ------MS-SLKTEDTAVYY
CTT-------
>V19RF-JYKQ01005787.1-ighv |(14728, 15050)|2.60812577899|(0.980,0.892,0.841)|1
-VLSQVTLKESG-PALVKPTQTLTLTCTVSGFSL----TTSGVGVSWIRQAPGKAL---E
WLAHIYW---TDSK--YYSPSLKSRLTISKDTSKNQVVLT------IT-NTDPVDTATYY
CARGAQ----
>V20RF-JYKQ01005788.1-ighv |(4951, 5260)|2.97639727933|(0.999,1.000,0.979)|1
-VLSQVQLQESG-PGLVKPSETLSLTCAVSGGSI----S--SYWWGWIRQPPGKGL---E
WIGIIYGS--GGSN--YLNPSLKSRVTLSVDTSKNQFSLK------LS-SVTAADTAVYY
CAR-------
>V21RF-JYKQ01005789.1-ighv |(14344, 14653)|3.0|(1.000,1.000,1.000)|1
-VQCEVQLVESG-GGLVQPGGSLRLSCAASGFTF----SS--YGMHWARQAPGKGL---E
WVSAINN--GGGST--WYADSVKGRFTISRENAKNTLYLQ------MN-SLRAEDTAVYY
CAK-------
>V23RF-JYKQ01029805.1-trbv |(2386, 2683)|2.85397526728|(0.994,0.988,0.904)|1
--SLDTAVSQTPKYLVTQTGKNEYLKCEQNLGH---------DTMYWYKQDSKKLL---N
IMFSYN-N--KQLI---INETVPNRISPDSPD-KAHLNLH------IT-SLELGDSAVYF
CASSQ-----
>V24RF-JYKQ01029805.1-trbv |(7011, 7308)|2.9929000027|(1.000,0.996,0.997)|1
--PIDTGITQTPKHLVMGMTNKKSLKCEQHMGH---------RAVYWYKQKAKKPP---E
IMFMYN-Y--ETL---SINESVPSRFSPECSK-SSLLYLH------LR-ALQPEDSALYL
CASSQ-----
>V25RF-JYKQ01029807.1-trbv |(1955, 2255)|2.53437564642|(0.981,0.991,0.752)|1
--HTEPEVTQTPSHQVTQMGQEVILRCVPISNH---------LYFYWYRQILGQKV---E
FLVSFY-N--GKIS--EQSEIFDDRFSVGRSD-GVHFTLK------IK-STKLEDSAMYF
CASSE-----
>V27RF-JYKQ01029807.1-trbv |(18088, 18388)|2.84902658657|(0.985,0.991,0.901)|1
--HTEPEVTQTPSHQVTQMGQEVILRCVPISNH---------FYFYWYRQILGQKV---E
FLVSFV-N--DEIS--DKSEMFDDRFSVERPD-GSNFTLK------IK-STKLEDSAMYF
CASSE-----
>V28RF-JYKQ01029807.1-trbv |(28941, 29238)|3.0|(1.000,1.000,1.000)|1
--PTDTGVTQTPKHLVMGMTNKKSLKCEQHLGH---------NAMYWYKQKAKKPP---E
LMFVYQ-Y--EKL---SINESVPSRFSPECSK-SSLLYLH------LQ-ALQPEDSALYL
CASSQ-----
>V29RF-JYKQ01029807.1-trbv |(39844, 40134)|2.93664403777|(0.978,0.973,0.986)|1
----EAGVTQTPRSLIKMRGQQVTLSCSPISGH---------RSVSWYQQTPGQGL---Q
FLFEYF-S--ETQR---EKGKFPSRFSGRQFS-NSRSEMN------VS-TLELEDSALYL
CASSL-----
>V30RF-JYKQ01029809.1-trbv |(772, 1069)|2.9969280013|(0.997,1.000,1.000)|1
--PANADVTQSPKFQILKTGQSMTLQCAQDMNH---------NSMYWYQQDPGMGL---R
LIHYSA-T--EDTT---DPGEVPDGYSVSRLN-KKEFLLK------LE-SAAPSQTSVYF
CASSE-----
>V31RF-JYKQ01029809.1-trbv |(15370, 15683)|2.98121230726|(0.999,0.998,0.985)|1
--SLDTAVSQTPKYLVTQTGKNESLKCEQNLGH---------DTMYWYKQDSKKLL---K
IMFSYN-N--KEPI---LNETVPNRFSPKSPD-KAHLNLH------IK-SVELGDSAVYF
CASSQDIALQ
>V32RF-JYKQ01029809.1-trbv |(18791, 19104)|2.90830128432|(0.975,0.980,0.955)|1
--PMDTGVTQTPRHLVMGMTNKKSLKCEQHLGH---------NAMYWYKQKARKPP---E
LMFIYN-F--KEP---AENNSVPSRFVPECPD-SSLFYLH------LH-ALQPEDSALYL
CASSQDTALQ
>V33RF-JYKQ01029809.1-trbv |(33264, 33561)|3.0|(1.000,1.000,1.000)|1
--PVNAGVTQTPKFQILKTGQNMTLKCAQDMNH---------NYMYWYRQDPGMGL---R
LIHYSA-G--EGST---EKGEVPDGYNASRLN-PQNFLLR------LE-SAAPSQTSMYF
CASSE-----
>V34RF-JYKQ01029809.1-trbv |(37007, 37307)|2.99899600001|(1.000,0.999,1.000)|1
--HTGAGVSQSPRNKVTEEGKDVVLRCDPISGH---------TALYWYRQSLGKGL---E
FLIYFQ-G--NDAP--DKSGLPSGRFSAERTE-GSVSTLK------IQ-RTEQGDSAVYL
CASSL-----
>V35RF-JYKQ01029811.1-trbv |(568, 868)|2.99294800078|(0.998,1.000,0.995)|1
--HTGAGVSQFPSNKVTEKGKDVALRCDPISGH---------AVLYWYRQNLGQGL---E
FLIYFQ-G--TGAV--DDSGLRSDRFSATRPE-GSVSTLK------IR-HTEQGDSATYF
CASSL-----
>V36RF-JYKQ01029811.1-trbv |(5612, 5908)|2.92463012727|(0.999,0.941,0.998)|1
--PVDTGVTQSPTHLIKTRGQQVTLRCSPISGH---------TSVSWYQQAPGQGP---Q
FIFEYA-N--ELRT---SEGNFPHRFSGRQFR-DYHSEMN------VS-ALELGDSALYL
CASSL-----
>V37RF-JYKQ01029811.1-trbv |(8288, 8584)|2.99799600001|(0.999,1.000,0.999)|1
--SVDSGVTQTPKHLITAIGQQVTLRCSPRSGD---------LSVYWYQQSLGQGL---Q
FLVQYY-N--GEER---EKGNILERFSAQQFP-DLHSELN------LS-SLELGDSALYF
CASSL-----
>V39RF-JYKQ01041707.1-ighv |(10254, 10563)|3.0|(1.000,1.000,1.000)|1
-AHSQVQLVQSG-PEVKQPGASVKVSCKASGYSF----TT--YGMNWVRQAPGQGL---E
WMGWMNT--YTGNP--TYAQGFTERFVFSMDTSVSTVYLQ------IS-SLKAEDTAMYY
CAR-------
>V40RF-JYKQ01041713.1-ighv |(30683, 30998)|3.0|(1.000,1.000,1.000)|1
-VQCEVQLVESG-GGLVQPGGSLRLSCAASGFTF----SS--SAMHWVRQASGKGL---E
WVGYIRSKSNNYAT--QYAASVKGRFTISRDDSKNTLYLQ------MS-SLKTEDTAMYY
CTT-------
>V41RF-JYKQ01041713.1-ighv |(41631, 41955)|2.94111131168|(0.966,0.996,0.984)|1
-VQCEVQLVESG-GGLVQPGESLRLSCAASGFTF----SD--YYMDWVCQAQGRGWSGLA
TQTLFLNKANSYTT--EYAASVKGRFTISRDDSENTLYLQ------TS-SMNTEDTAVYY
CAR-------
>V42RF-JYKQ01041713.1-ighv |(51469, 51784)|2.99899600001|(1.000,1.000,0.999)|1
-VQCEVQLVESG-GGLVQPGGSLRLSCAASGFTF----SD--HYMQWVRQAPGKGL---E
WVGFIRSKAYGGTA--EYAASVKGRFTISRDDSKSIASLQ------MS-SLKTEDTAVYY
CAR-------
>V44RF-JYKQ01041713.1-ighv |(71051, 71357)|3.0|(1.000,1.000,1.000)|1
-VQCEVQLVESG-GGLVQPGGSLRLSCAASGFTF----SS--YGMNWVRQAPGKGL---E
WVSYISS--G-GST--YYADSVKGRFTISRDNSKNTLSLQ------MN-SLRAEDTAVYY
CAG-------
>V45RF-JYKQ01041718.1-ighv |(4152, 4461)|2.97870083945|(0.999,1.000,0.981)|1
-AHSQVQLVQSG-AEIKQPGASVKLSCKASGYTF----TS--YYMHWVRQAPGQGL---E
WIGLISP--YNGNK--GYAQNFQGRVTITADTSTSTGYME------LS-SLRSEDTAVYY
CTR-------
>V46RF-JYKQ01041718.1-ighv |(11509, 11818)|2.98632422844|(1.000,0.987,1.000)|1
-VQGEVQLVESR-GGLAKPGGSLRLSCAASGFTF----SG--YNMYWVRQASGKGL---E
WVSGISYT--GGST--WYADSVKGRFTISRENAKNTLYLQ------MN-SLRAEDTAVYY
CAR-------
>V48RF-JYKQ01041718.1-ighv |(32027, 32336)|2.99899600001|(1.000,1.000,0.999)|1
-VQCEVQLVESG-GGLVKPGASLRLSCAASGFTF----GD--YTMHWVRQAPGKGL---E
WVSYISS--ASSYI--HYADSVKGRFTISRDNAKNSLYLQ------MN-SLKTEDTAVYY
CTR-------
>V50RF-JYKQ01051981.1-igkv |(559, 859)|3.0|(1.000,1.000,1.000)|1
-ARCDIQMTQSPSSLSASVGDRVTITCQASQGI------S--SWLAWYQQKPGKAP---K
LLLYK-------AS--GLQSGVPSRFSGSG--SGTEFTLT------IS-SLQPEDFATYY
CQQFSSAL--
>V52RF-JYKQ01051984.1-igkv |(27105, 27405)|2.99093200206|(0.998,0.994,0.999)|1
-ARCDIQMNQSPSSLSASVGDTVTITCRANQGI------S--NNLAWYQQKPGKVP---Q
LLIYY-------AS--SLASGIPSRFSGSG--SGTEFTLT------IS-SLQPEDFAAYY
CLQHNSYP--
>V53RF-JYKQ01051985.1-igkv |(4005, 4303)|2.54382230064|(0.992,0.958,0.773)|1
-TTVEIVMTQSPATLSLSPGERATLSCRASQSVS--------SYLSWYQQKPGQAP---R
ILIYG-------AS--SRATGIPDRFSGSG--SGTDFTLT------IS-SLEPEDVGVYF
CPQSSNW---
>V54RF-JYKQ01052451.1-igkv |(138345, 138660)|2.8568400105|(0.951,0.957,0.949)|1
-TSGDILLTQTPLSLPVTTGEPASISCRSSQSLLHS-NEN--TYLHWYLQKPGQSP---Q
LLIYE-------VS--NRASGVPERLSGSG--SDTDFTLK------IN-LVEAEDVGVYY
CMQTTQWP--
>V55RF-JYKQ01052451.1-igkv |(143240, 143558)|3.0|(1.000,1.000,1.000)|1
-SSGDIVMTQTPLSLPVTPGEPASISCRSSQSLLDSEDGN--TYLDWYLQKPGQSP---Q
LLIYE-------VS--NRASGVPDRFSGSG--SDTDFTLK------IS-RVEAEDVGVYY
CMQALQNP--
>V57RF-JYKQ01054925.1-trav |(5041, 5338)|2.99289600501|(0.999,0.994,1.000)|1
-GLRAQLVTQPEDQVTVAEGNPLTVKCTYSVSG-----N---PYLFWYVQYPNQGL---Q
FLLKYI-T--GDN-----LVKGSYGFEAEFNKSQTSFHLK------KP-SALVSDSALYF
CAVR------
>V58RF-JYKQ01054933.1-trav |(11630, 11920)|3.0|(1.000,1.000,1.000)|1
-MSRGEDVEQS-LFLSVREGDISVINCTYTDSS------S--TYLYWYKQEPGAGL---Q
LLIYIL-S--NMD------LKRDQRVTVLLNKKDKHLSLR------IA-DTQTEDSAIYF
CAES------
>V59RF-JYKQ01054940.1-trav |(18103, 18397)|3.0|(1.000,1.000,1.000)|1
-GINGDSVVQTEGQVLLSEGNSLIVNCSYESTQ-----Y---PSLFWYVQYPGEGP---Q
LLLKAM-K--DND------KESNKGFEATYRKETTSFHLE------KD-SVQESDSAVYF
CALS------
>V60RF-JYKQ01054940.1-trav |(31345, 31638)|3.0|(1.000,1.000,1.000)|1
-GSGKNQVEQSPQSLIILEGKNCTLQCNYTVSP------F--NNLRWYKQDTGKGP---I
SLTIMT-F--S-E-----NTKSNGRYIATLDADTKQSSLH------IT-AAQLSDSASYI
CVVS------
>V61RF-JYKQ01054940.1-trav |(46970, 47276)|2.99696400065|(1.000,1.000,0.997)|1
VWSQQKEVEQDPGPFSVPEGATVTFNCTYSNSA------S--QSFFWYRQDSRKEP---K
LLMSAY-S--S--------GNEDGRFTAQLNRASQYISLL------IR-DSQLSDSATYL
CAVYTQCSP-
>V62RF-JYKQ01054940.1-trav |(52430, 52727)|2.99596800026|(1.000,0.998,0.998)|1
-GTRAQSVTQLDSQVSVSEGAPVLLRCNYSSSV-----P---PYLFWYVQYPNQGL---Q
LLLKYT-S--GTT-----LVKGINGFEAEFKKSETSFHLR------KA-SAHVSDAAEYF
CAVS------
>V63RF-JYKQ01054942.1-trav |(16188, 16478)|2.99798400013|(1.000,0.998,1.000)|1
--VNGENVEQHPSILSVQEGDSSVIKCTYSDSA------S--NYFPWYKQELGKEP---Q
FIIDIR-S--NAH------EKKDQRITVLLNKTAKHFSLH------IT-ETQPGDSAVYF
CAAS------
>V64RF-JYKQ01054942.1-trav |(38704, 38992)|3.0|(1.000,1.000,1.000)|1
VWS-QQKVEQNSGPLSVPEGAIASLNCTYSDRG------S--QSFFWYRQYSGQSP---E
LLMSTY-S--SGD------K-EDGRFTAQLNRASQYVSLL------IR-DSQPSDSATYL
CAV-------
>V65RF-JYKQ01054942.1-trav |(45190, 45487)|2.95840068997|(0.988,0.972,1.000)|1
-GTKAQSVTQLDSQVSVSEGVPVLLRCNYSSSF-----P---PTLFWYVQYPNQGL---Q
LLLKYT-S--GTT-----LVKGINGFEAEFKKSETSFHLT------KA-SAHVSDAAEYF
CAVN------
>V66RF-JYKQ01054942.1-trav |(64627, 64920)|2.99385601037|(1.000,1.000,0.994)|1
-VSRGESVGLHLPTVSVQEGDNSVINCTYSDSA------S--DYFLWYKQESGKGP---Q
SIIDIR-S--NMA------KRQGQRLTVFLNKTMKHLSLQ------IA-ATEPGDSAVYF
CAEN------
>V67RF-JYKQ01054942.1-trav |(70517, 70818)|2.90590958026|(1.000,1.000,0.927)|1
-SGIAQKITQTQPAMFVQEKEAVTLDCTYDTSD-----QS--YGLFWYKQPSSGEM---I
FLILQM-S--YDK-----QNATEGRYSLNFQKARKSVNLV------IS-ASQVGDSAMYF
CAMR------
>V68RF-JYKQ01054942.1-trav |(88856, 89150)|3.0|(1.000,1.000,1.000)|1
-RTRGDSVTQMEGPVTLSERAFLTINCTYTATG-----Y---PSLFWYVQYPGEGP---Q
LLLKAT-K--TDE------KGSNKGFEATYRKETTSFHLK------KD-SVQESDSAVYF
CALS------
>V69RF-JYKQ01054942.1-trav |(113522, 113815)|2.99796800026|(0.998,1.000,1.000)|1
VWSQQKEVEQNPGPLSVPEGATASLNCTYSNSA------F--QYFMWYRQYSRKGP---Q
LLIYIY-S--SGN------K-EDGRFTAQVDKSSKYISLF------IR-DSQPNDSATYF
CAMS------
>V70RF-JYKQ01054953.1-trav |(3497, 3784)|3.0|(1.000,1.000,1.000)|1
--VNSQQGEEDPQTLSIQEGENATMNCSYKTS-------I--NNLQWYRQDSGRSL---V
QLILIR-S--NER------EKNSGRLRVTLDTSKKSSSLL------IT-ASRAADTASYF
CATD------
>V71RF-JYKQ01054957.1-trav |(3986, 4277)|2.99899600001|(1.000,0.999,1.000)|1
-RTNGDSVTQTEGPVTLPERAALTLNCTYQTSY-----S---AFIFWYVQYPNKEP---E
LLLKSS----ENQ------ETNSRGFQASHVKSDSSFHLE------KP-SVQLSDSAVYY
CVLR------
>V72RF-JYKQ01054957.1-trav |(7206, 7509)|2.98209640489|(0.999,1.000,0.984)|1
-SSMAQKVTQAQTEISVVEKEDVTLDCVYETRD-----TT--YYLFWYKQPPSGEL---V
FLIRQN-S--FDE-----QNEINGRYYSKFQKSTSSFNLT------IT-ASQVVDSAVYF
CALNE-----
>V73RF-JYKQ01054957.1-trav |(42945, 43232)|2.98880001921|(0.999,0.992,0.998)|1
-LSGEDQVTQSPEALSLQEGDSSSLNCSYTVSG------L--RGLLWYRQDPGKGP---E
FLFILY-S--AGE------EKEKERLKATLTKK--ESFLH------IT-GPKPEDSATYL
CAVQ------
>V75RF-JYKQ01062966.1-iglv |(12021, 12331)|2.99696400065|(1.000,0.997,1.000)|1
-SWAEVVFTQPH-SVSGSPGQTVTISCTRSSGSI---D-S--SYVYWYQQRPGSAP---T
TVIYS-------DD--QRPSGVPDRFSGSIDSSSNSASLT------IS-GLKSEDEADYY
CQSYDSSS--
>V76RF-JYKQ01067073.1-ighv |(701, 1007)|2.88157209623|(0.937,0.997,0.965)|1
-VRCEVQRVESG-GGLVQPGGSLRLSCAASGFTI----SS--SWMNWDFQAPGKGL---E
CVSHIIS--GG-ST--DYPDSFKGRFTISRDNTKNTLYVQ------KN-SLRAEDMAVYY
CAR-------
>V77RF-JYKQ01067101.1-ighv |(5042, 5351)|3.0|(1.000,1.000,1.000)|1
-TQSQVQLVQSG-AEVKKPGASVKLSCKASGYTF----TS--YGINWVRQAPGQGL---E
WMGWINP--SNGNT--GYAQKFQGRVTMTRDTSTSTAYME------LN-SLRSDDTAVYY
CAR-------
>V78RF-JYKQ01067101.1-ighv |(30146, 30461)|2.98764005313|(1.000,0.991,0.997)|1
-VLSQVQLQESG-PGVVKPSETLSLTCAVSGASI----SSGYYYWSWIRQPPGKGL---E
WIGGIYSN--SGST--NYNPSLKSRVTISKDTSKNQFSLK------LS-SVTAADTAVYY
CAR-------
>V79RF-JYKQ01079834.1-igkv |(1757, 2043)|2.76508785087|(0.990,0.868,0.967)|1
-----IVLTQSPATLALSPGEGATLSCRASQSVS--------RYSSWYQQKPGQAP---R
LLIYG-------AS--SRATGIPARFSGSG--SGTDFTLT------IS-SLEPEDVAVYF
CQQSNNW---
>V80RF-JYKQ01086555.1-ighv |(11851, 12160)|2.98270402421|(0.995,0.988,1.000)|1
-VQCEVQLVESG-GGVVQPGGSLRLLCAASGFTF----DD--YAMHWVRQAPGKGL---E
WVSAISW--DGDST--YYADSVKGRFTISRDNAKNSLYLQ------MN-SLRAEDTAVYY
CAR-------
>V81RF-JYKQ01114545.1-iglv |(3565, 3871)|3.0|(1.000,1.000,1.000)|1
--DSETVVTQEP-SLSVSSGGTVTLTCGLSSGSV---STS--NYPSWYQQTPGQAP---R
TLIYR-------TN--TRPSGVPDRFSGSI--LGNKAALT------IT-GAQADDESDYY
CMLYMGSGI-
>V83RF-JYKQ01131090.1-trbv |(8544, 8841)|2.83824910116|(0.971,0.895,0.998)|1
--HRDAEITQSPRYKVTETGRKVTLTCHQTWNH---------NNMFWYRQDLGHGL---R
LIYYSA-G--ASII---DKGEVPDGYVVSRSK-TEDFPLT------LE-SATRSQTSVYF
CASSE-----
>V85RF-JYKQ01131090.1-trbv |(36297, 36594)|3.0|(1.000,1.000,1.000)|1
--PVNAGVTQTPKFQILKTGQSMTLQCAQDMNH---------DCMYWYRQDPGMGL---R
LIHYSV-G--EGST---DKGEVPDGYNVTRSN-TEDFPLR------LE-SAAPSQTSVYF
CASSY-----
>V86RF-JYKQ01131090.1-trbv |(40488, 40788)|2.98548011776|(1.000,0.989,0.997)|1
--HTGAGVSQSPRYKVTKRGQDVALRCDPISGH---------DYLYWYQQAPGQGP---A
FLTYFQ-N--DAQR--DKSGLPNDRFSAEMPE-GSVSTLK------IQ-RTEQGDSAVYL
CASSL-----
>V87RF-JYKQ01131090.1-trbv |(48415, 48705)|2.89755295615|(0.995,0.970,0.945)|1
----DAGVTQSPTHLIKTRGQQVTLRCSPISGH---------TSVYWYQQALGQGL---Q
FILWYD-E--EEQR---DRGTFPHRFSGRQFP-NYSSELN------VN-ASEMGDSALYL
CASSL-----
>V89RF-JYKQ01131090.1-trbv |(60130, 60430)|2.99696400065|(1.000,0.997,1.000)|1
--HTGAGVSQSPRYKVTKRGQDVALRCDPISGH---------VALYWYRRTLGQGP---E
FLTYFQ-N--DAQP--DKSGLPSDRFSAERPE-GSVSTLK------IQ-RTEQGDAAVYL
CASSL-----
>V90RF-JYKQ01131091.1-trbv |(1114, 1410)|2.99289600501|(0.999,0.994,1.000)|1
--SVDGGVTQSPRHLIKTTGQQVTLRCSPISGH---------TSVSWYQQALGQGP---Q
FIFEYY-E--EKER---ERGNFPDRFSGHQFP-NYSSELN------VN-ALEAGDSALYL
CASSL-----
>V91RF-JYKQ01131092.1-trbv |(9, 305)|2.99289600501|(0.999,0.994,1.000)|1
--SVDGGVTQSPRHLIKTTGQQVTLRCSPISGH---------TSVSWYQQALGQGP---Q
FIFEYY-E--EKER---ERGNFPDRFSGHQFP-NYSSELN------VN-ALEAGDSALYL
CASSL-----
>V92RF-JYKQ01131092.1-trbv |(3324, 3621)|2.99396400065|(0.999,0.999,0.996)|1
--LVNAGVTQTQKFQVLKTGQSMTVQCAQDMNH---------DCMYWYRQDPGMGL---R
LIHYSD-A--AGTT---DKREVPSGYNVSRLN-IEDFPLR------LE-SAAPSQTSVYI
CASSY-----
>V94RF-JYKQ01131093.1-trbv |(13830, 14126)|2.86463755605|(0.979,0.934,0.961)|1
--SVDAGVTQSPTHLIRKRGQQVTLRCSPISGH---------NTVSWYKRALGQGP---Q
FIFQYY-E--KEER---ERGNFPGRFSGHQFP-NYSSELN------VN-ASEMGDSALYL
CASSL-----
>V95RF-JYKQ01131093.1-trbv |(22892, 23189)|3.0|(1.000,1.000,1.000)|1
--PGNAGVTQTPKFQILKTGQSMTLQCAQDMNH---------NYMSWYRQDPGVGL---R
LIHYSV-G--AGVT---DKGEVSNGYNVSRLN-TEDFPLS------LE-SAASSQTSVYF
CASSY-----
>V96RF-JYKQ01131094.1-trbv |(5376, 5676)|2.99899600001|(1.000,0.999,1.000)|1
--HTGAGVSQFPRYRVTKRGQDVTLRCDPISGH---------EYLYWYQQAPGQGP---E
LLTYFQ-N--DAQL--DKSGLPSDRFSAERTE-GSVSTLK------IQ-RTEQGDSAVYL
CASSL-----
>V97RF-JYKQ01131094.1-trbv |(13819, 14115)|2.994900005|(1.000,0.995,1.000)|1
--PVDTGVTQSPTHLIKTRGQQVILRCSPISGH---------SSVYWYQQALGQGP---Q
FIFEYY-E--KEER---GRGNFPDRFSGRQFP-NYSSELN------VS-ALLLGDSALYL
CASSL-----
>V98RF-JYKQ01131094.1-trbv |(21287, 21594)|2.97258408012|(0.987,0.997,0.989)|1
--PGNADVTQTPKFQVLKTGQSLTLQCAQDMNH---------NYMYWYRQDPGMGL---R
LIHYSV-G--AGIT---DKGEVPNGYNVFRLN-TEDFPLR------LE-SAALSQTSVYF
CASSDTTV--
>V99RF-JYKQ01131095.1-trbv |(9158, 9454)|2.99593600205|(1.000,0.996,1.000)|1
--PVDTGVTQSPTHLIKMRGQQVTLRCSPISGH---------SSVSWYQQALGQGP---Q
FIFQYY-E--KEER---GRGNFPDRFSGRQFP-NYSSELN------VS-ALLLGDSALYL
CASSL-----
>V100RF-JYKQ01131096.1-trbv |(2555, 2846)|2.99696400065|(1.000,1.000,0.997)|1
----NAGVTQTPKFQVLKTGQSMIVQCAQDMKH---------DYMFWYRQDPGMGL---R
LIYYSV-T--AGIT---TKGEVPNGYNVSRIN-TEDFLLR------LE-SAAPSQTSVYF
CASSY-----
>V101RF-JYKQ01131098.1-trbv |(4345, 4645)|2.991900005|(0.999,0.994,0.999)|1
--HTGAGVSQSPRYKVIKKGQDVALRCDPISGH---------AGLYWYQQALGQGP---E
FLTYFN-Y--QAQP--DKSGLPNDRFSAERHE-GSVSTLT------IQ-RTEQQDSAVYL
CASSL-----
>V102RF-JYKQ01131101.1-trbv |(106, 402)|2.61794442369|(0.956,0.981,0.789)|1
--PVDAGVAQSPTHLIKTRGQQVTLRCSPISGH---------NTVYWYQQALGQGP---Q
LIFQYY-R--GEDR---GRGNFPDRFSGHQFP-NYSSELN------VS-ALLLGDSALYL
CASSL-----
>V103RF-JYKQ01131101.1-trbv |(9053, 9353)|2.99899600001|(1.000,0.999,1.000)|1
--HTDARVSQDPRHKITKTGQNVSFKCVPISEH---------NRLYWYRQTLGQGP---E
FLTYFQ-N--EAQQ--DRSGLFSDRFSAERPE-GSISTLM------IQ-HTEQGDSAVYL
CASSL-----
>V104RF-JYKQ01131101.1-trbv |(23980, 24277)|2.99899600001|(1.000,1.000,0.999)|1
--HMDAGITQSPRHKITETGTPVTLRCHQTENH---------RYMYWYRQDLGRGL---R
LIHYSY-G--VEDT---DKVEVSDGYSVSRSK-TEDFLLT------LE-SATRSQTSVYF
CASSE-----
>V105RF-JYKQ01131102.1-trbv |(2948, 3248)|2.99899200002|(0.999,1.000,1.000)|1
--HTDAGVIQSPRHKVTEMGKEVTLRCEPISGH---------TYLFWYRQTMMQGL---E
FLIYFN-N--KDPT--DDSGMPKDRFSAKMPN-ASFSTLK------IQ-PSEPRDSAVYF
CASSL-----
>V106RF-JYKQ01131102.1-trbv |(18186, 18486)|2.97039727933|(0.997,0.998,0.977)|1
--LIDAGVTQTPRHKVTEMGQEVTMRCQPILGH---------NTVFWYRQTMMQGL---E
LLVYLR-N--KASL--DDSGMPKDRFSAEMPN-ASLATLK------IQ-PSEPRDSAVYL
CASGL-----
>V107RF-JYKQ01131102.1-trbv |(25139, 25439)|2.8542125406|(0.995,1.000,0.897)|1
--HTEAGVTQFPSHRVIEKGQTVTLRCDPISGH---------DYLYWYRRVMGKEI---K
FLISFM-R--VSTQ--DESGMPNKRFSAERTG-GTYSTLK------VQ-PAELEDSGVYF
CASSQ-----
>V109RF-JYKQ01131102.1-trbv |(35121, 35421)|2.89941351455|(0.996,1.000,0.924)|1
--SPGEEVTQTPKHLVKGEGQKAKLYCDPIKGH---------SYVFWYQQVLRKEF---K
FLISFQ-N--KNVF--DETGMPKERFSAKCHA-NSPCSLE------IQ-ATKLKDSAVYF
CASSQ-----
>V111RF-JYKQ01131104.1-trbv |(2283, 2580)|2.98672803289|(0.999,0.997,0.991)|1
--TVDGGITQSPKYVFRKEGQNVTLSCEQNLNH---------NAMYWYRQDPGQGL---R
LIYYSQ-I--VNDI---QKGDIAEGYSVSRER-KQSFPLT------VT-SAQRNPTAFYL
CASSI-----
>V112RF-JYKQ01131104.1-trbv |(20313, 20613)|2.92077645736|(0.982,0.973,0.967)|1
--STDTKVTQRPRLLVKANGQKAKMDCVPVKGH---------SYVYWYRKKLDEEL---K
FLVYFQ-N--EEII--QKAEIINERFSAQCPQ-NSPCTLE------IQ-STESGDAALYY
CASSK-----
>V113RF-JYKQ01131105.1-trbv |(770, 1075)|2.99398000014|(0.999,0.997,0.998)|1
--SFHAEVTQTPGYLVKGKGQKTKMDCTPEKGH---------TYVYWYQQNQNKEF---T
FLISFQ-D--EQVL--QETELHKKRFSSQCRK-NLPCSLE------IP-SSEPGDTALYL
CASSQST---
>V114RF-JYKQ01131107.1-trbv |(8150, 8448)|2.93379033782|(0.996,0.999,0.948)|1
--SMDADVTQTPRNKIAKTGKRIMLECSQTKGH---------DQMYWYRQDPGLGL---R
LIYYSF-D--VQDI---NKGEISDGYSVSRQE-QAKFSLS------LE-SATPNQTALYF
CATSD-----
>V115RF-JYKQ01131107.1-trbv |(16640, 16937)|2.84974282068|(0.987,1.000,0.896)|1
--LMEADIYQNPRHRVIGTGKKITLECSQTMGH---------DKMYWYQQDPGMEL---H
LIHYSY-G--VNST---ERGDYSSKSTVSRLR-IEHFPLT------LE-STSPSHTSQYL
CASSE-----
>V116RF-JYKQ01131110.1-trbv |(21384, 21680)|2.86222261145|(0.993,1.000,0.902)|1
--PLEAQVTQNPRYLITVTGKKLTVTCSQNMNH---------EYMSWYRQDPGLGL---R
QIYYSS-N--VELV---DKGDIPEGYNVSRKE-KTTFPLI------LE-SPSPSQTSLYF
CASSY-----
>V117RF-JYKQ01131110.1-trbv |(26751, 27058)|2.98580401921|(0.993,1.000,0.993)|1
--LVDVKVTQSSRYLIKRTGEKVFLECVQDMDH---------ERMFWYRQDPGLGL---R
LIYFSY-D--VKLN---EKGDIPEGYSVSREK-KERFSLI------LG-STSTNQTSMYL
CASSLSTA--
>V118RF-JYKQ01131111.1-trbv |(5907, 6210)|2.99296000066|(0.997,0.996,1.000)|1
-SVFSAVISQKPSRDVCQRGTSVTFQCQVDSQV---------TMMFWYRQRPGQSM---T
LIATANQG--SEAT--YESGFVIDKFPISRPN-LTFSTLT------VS-NTSPEDSSIYL
CSVE------
>V119RF-JYKQ01135385.1-trdv |(1626, 1927)|2.89431815075|(0.996,0.998,0.922)|1
-SGMAQTVTQSQPEVSVREAETVTLSCTYDTSE-----SN--YYLFWYKQPPSRQM---I
LIIRQE-A--YKQ-----QNATENRFSVNFQKAAKSFSLK------IS-DSQLGDAAMYF
CAFM------
>V120RF-JYKQ01135388.1-trav |(4501, 4803)|2.99899600001|(1.000,0.999,1.000)|1
-SGMAQTVTQSQPEMSVQEAETVTLSCTYDTSE-----SN--YYLFWYKQPPSRQM---I
LIIRQE-A--YKQ-----QNATENRFSVNFQKATKSFSLK------IS-DSQLGDAAMYF
CAYRS-----
>V121RF-JYKQ01135389.1-trav |(2804, 3092)|3.0|(1.000,1.000,1.000)|1
-LSGELKVGQNPLFLSTQEGKNYTIYCNYSTA-------S--DRLYWYRQDPGKSL---E
SLFVLL-S--NGA------VKQEGRLMASLDTKARLSSLH------IT-AALQDLSATYF
CAV-------
>V123RF-JYKQ01187326.1-igkv |(1372, 1659)|2.90858683121|(0.999,0.929,1.000)|1
-----TVVTQSPATLSVSPGERATISCRTSQSVG--------SRLAWYQQKPGQAP---R
LLIYG-------AS--NRATGIPDRFSGSG--SGTDFTLT------IS-SLKPEDAAVYY
CQQDNDWK--
>V124RF-JYKQ01187337.1-igkv |(7825, 8116)|2.99599200002|(0.998,0.999,0.999)|1
-----IVLTQSPTSMAVSQGERVTISCTASSSVS-----T--SYLHWYQQKPGFPP---R
LLVYR-------TS--NLASGVPARFSGSG--SGTSYTLT------IS-SMEAEDAANYY
CQQGNSIP--
>V125RF-JYKQ01245859.1-ighv |(891, 1200)|3.0|(1.000,1.000,1.000)|1
-AHSQVQLVQSG-AEVKKPGASVKVSCKASGYTF----TD--YYMHWVRQAPGQGL---E
WIGWINP--YNGNT--KYAQKFQGRVTMTRDTSTSTAYME------LS-SLRSEDTAVYY
CAR-------
>V126RF-JYKQ01245874.1-ighv |(7328, 7639)|2.98788400513|(0.997,0.992,0.999)|1
-VRCEVQLVESG-GGVVQPEGSLRLSCAASGFTF----DD--YAMHWVRQAPGKGL---E
WVSGISWN--GDST--YYADSVKGRFTISRDNAKNSLFLQ------MN-RLRAEDTAVYY
CAKD------
>V127RF-JYKQ01245874.1-ighv |(37996, 38302)|3.0|(1.000,1.000,1.000)|1
-VQCEEQLVESG-GGLVQPGASLRLSCAASGFTF----SS--YDMHWVRQAPGKGL---E
WVSAISI--G-GGT--YYPDSVKGRFTVSRDNAKNSLYLQ------MN-SLRAEDTAVYY
CAR-------
>V128RF-JYKQ01245876.1-ighv |(15391, 15700)|2.97688400513|(0.990,0.992,0.995)|1
-VLSQLQLQESG-PGVVKPSETLSLTCAVSGGSI----S--SYWWGWIRQPPGKGL---E
WIGSIYGS--GGSN--YLNPSLKSRVTLSVDTSKNQFSLK------LS-SVTAADTAVYY
CAR-------
>V129RF-JYKQ01245876.1-ighv |(36255, 36564)|3.0|(1.000,1.000,1.000)|1
-VQCEVQLVESG-GGLVQPGGSLRLSCAASGFTF----SS--YWMNWVRQAPGKGL---E
WVSRINS--DGSST--NYADSVKGRFTISRENAKNSLYLQ------MN-SLRAEDTAVYY
CTT-------
>V130RF-JYKQ01245880.1-ighv |(7638, 7950)|3.0|(1.000,1.000,1.000)|1
-VQCEVQLVESG-GGLVQPGGSLRLSCVASGFTF----SD--YYMHWARQAPGKGL---E
WVSRISSG-SGSST--YYPDSVKGRFTISRDNAKNTLYLQ------MN-SLRAEDTAVYY
CAR-------
>V131RF-JYKQ01245881.1-ighv |(6177, 6492)|3.0|(1.000,1.000,1.000)|1
-VQCEVQLVESG-GGLVQPGGSLRLSCAASGFTF----SD--HYMDWVRQAPGKGL---E
WVGFIKNKADGGTA--DYAASVKGRFTISRDDSKNTLYLQ------MN-SLKTEDTAVYY
CTR-------
>V132RF-JYKQ01245882.1-ighv |(18027, 18336)|2.9681290053|(1.000,0.988,0.982)|1
-AHAQVQLVQSG-AEVKQPGASVKVSCKASGYTF----TS--YGMNWVRQAHGQRL---E
WMGWINT--NTGNP--TYAQGFKERFTFSMDTSISTAYLQ------IS-SLKAEDTAVYY
CAR-------
>V133RF-JYKQ01245882.1-ighv |(35101, 35410)|2.9603881665|(0.984,0.996,0.981)|1
-AHSEVQLVQSG-AEVKKPGATVKISCKASGYTF----TD--YYLHWVRQAPGKGL---E
WMGRVDP--EDGEA--DYAQKFQDRLTMTADTSTDTAYME------LS-SLRSEDTAVYY
CTR-------
>V134RF-JYKQ01245886.1-ighv |(241, 551)|2.99798400013|(1.000,1.000,0.998)|1
-FQCEVQLVESG-GGLVQPGGSLRLSCVASGFTF----SD--HYMDWVRQAPGKGL---E
WVSSISTG-SGSTT--LYPDSVKGRFTISRDNAKNTVYLQ------MN-SLRAEDTAVYY
CA--------
>V135RF-JYKQ01245888.1-ighv |(1665, 1980)|3.0|(1.000,1.000,1.000)|1
-VQCEVQLVESG-RGLVQPGGSLRLSCAVSGFTF----SD--HYVSWVRQAPGKGL---E
WVGFMRNKANGGRT--EYAASVKGTFTISRDDSKSIASLQ------MS-SLKTEDTAVYY
CAR-------
>V136RF-JYKQ01245888.1-ighv |(18543, 18855)|3.0|(1.000,1.000,1.000)|1
-VLSQVQLQESG-PGVVKPSETLSLTCAVSGGSI----SD-SYYWSWIRQAPGKGL---E
WIGGIYGS--GSST--NYNPSLKSRVTISKDTSKNQFSLK------LS-SVTAADTAVYY
CAR-------
>V137RF-JYKQ01245889.1-ighv |(13016, 13325)|3.0|(1.000,1.000,1.000)|1
-VQCEVQLVESG-GGLAQPGGSLRLSCAASGFTF----SS--YGMSWVRQAPGKGL---E
WVSGISN--TGGSI--YYADSVKGRFTISRDNSKNTLSLQ------MN-SLRAEDTAVYY
CAK-------
>V138RF-JYKQ01245890.1-ighv |(4928, 5237)|2.99799600001|(0.999,1.000,0.999)|1
-VQCDVQLVESG-GGLVKPGGSLRLSCVASGFTF----SS--YAMHWVRQAPGKGL---E
WVSVISTS--GGTT--YYADSVKGRFTISRDNAKNSLFLQ------MN-SLRAEDTAVYY
CTR-------
>V139RF-JYKQ01245900.1-ighv |(4135, 4449)|2.28521166379|(0.981,0.660,0.982)|1
-VLSQVTLKESG-PALVKPTQTLTLTCTFSGFSI----STTGTGVGWIRQPPGKAL---E
WLASIYW---NDSK--YYSTSLKSRLTISKDTSKNQVVLT------MT-NMDPVDTATYY
CARV------
>V140RF-JYKQ01245904.1-ighv |(629, 938)|3.0|(1.000,1.000,1.000)|1
-VQCEVQLVESG-GGVVQPGGSLRLSCAASGFTF----DD--YAMGWVRQAPGKGL---E
WVSAISW--DGDST--GYADSVKGRFTISRDNAKNSLSLQ------MN-SLRAEDTAVYY
CAR-------
>V141RF-JYKQ01005004.1-igkv |(7879, 8179)|2.99899600001|(1.000,1.000,0.999)|-1
-TTGETVMTQSPATLSLSPGERATLSCRASQSVG--------SSLAWYQQKPGQAP---R
LLVYY-------AS--SRATGIPDRFSGSG--SGTDFTLT------IS-SLDPEDVGVYY
CQKYNDWP--
>V142RF-JYKQ01005007.1-igkv |(665, 964)|3.0|(1.000,1.000,1.000)|-1
-TTGEIVMTQSPATLSLSPGERATLSCRASQSVG--------SYLAWYQQKPGQAP---R
LLIYG-------AS--SRATGIPDRFSGSG--SGTEFTLT------IS-SLEPEDFAVYY
CQQYNNWN--
>V143RF-JYKQ01005012.1-igkv |(8346, 8639)|2.99696400065|(1.000,1.000,0.997)|-1
-ARCDIQMTQSPSSLSASVGDRVTITCRASQGI------S--TYLNWYQQKPGKAP---K
LLIYA-------AS--SLQSGVPSRFSGSG--SGTVFTLT------IS-SLQSEDFATYY
CLQYNS----
>V144RF-JYKQ01005013.1-igkv |(2914, 3214)|3.0|(1.000,1.000,1.000)|-1
-AKCDIQMTQSPSSLSASVGDRVTITCRASQGI------S--SYLAWYQQKPGKAP---K
PLIYY-------AS--NLESGVPSRFSGSG--SGTDFTLT------IS-SLQPEDFATYY
CQQYNSAP--
>V145RF-JYKQ01005014.1-igkv |(6504, 6804)|3.0|(1.000,1.000,1.000)|-1
-ARCDIQMTQSPSSLSASAGDRVTITCRASQGI------S--SYLAWYQQKPGKAP---K
LLIYD-------AS--NLQSGVPSRFSGSG--SGTEFTLT------IS-SLQPEDFAVYY
CQQRNSYP--
>V147RF-JYKQ01005018.1-igkv |(609, 897)|2.99899600001|(1.000,0.999,1.000)|-1
-----IVLTQSPGTLSLSPGERATLSCRASQSVS--------SSLAWYQQKPGQVP---R
LLIYG-------AS--SRATGIPDRFSGSG--SGTEFTLT------IS-SLEPEDFAVYY
CQQYSNWP--
>V148RF-JYKQ01005018.1-igkv |(13195, 13495)|3.0|(1.000,1.000,1.000)|-1
-ARCDIQMTQSPSSLSASVGDRVTITCRASQGI------S--TYLNWYQQKPGKAP---K
LLIYA-------AS--RLESGVPSRFSGSG--SGTEFTLT------IS-SLQPEDFATYY
CQQYNSNP--
>V149RF-JYKQ01005019.1-igkv |(2049, 2337)|2.99899600001|(1.000,0.999,1.000)|-1
-----IVLTQSPGTLSLSPGERATLSCRASQSVS--------SSLAWYQQKPGQVP---R
LLIYG-------AS--SRATGIPDRFSGSG--SGTEFTLT------IS-SLEPEDFAVYY
CQQYSNWP--
>V150RF-JYKQ01005022.1-igkv |(4846, 5146)|3.0|(1.000,1.000,1.000)|-1
-ARCDIQMTQSPSSLSASAGDRVTITCRASQGI------S--TYLNWYQQKPGKAP---K
LLIYA-------AS--SLQSGVPSRFSGSG--SGTEFTLT------IS-SLQPEDFATYY
CQQYNSYP--
>V151RF-JYKQ01005026.1-igkv |(2797, 3089)|3.0|(1.000,1.000,1.000)|-1
-AKCDIQMTQSPSSLSASVGDRVTITCRASQTI------S--SYLAWYQQKPGKVP---K
LLIYA-------AS--SLESGVPSRFSGSG--SGTEFTLT------IS-SLQPEDFATYY
CQQHN-----
>V152RF-JYKQ01005027.1-igkv |(25376, 25667)|2.99798400013|(1.000,0.998,1.000)|-1
----DIQMTQSPASLSASVGDRVTITCRASQSF------S--SSLAWYQQKPGKAP---K
LLIYS-------AS--SLQSGVPSRFSGSK--SGTDFTLT------IS-SLQPEDIASYY
CQQYYSTP--
>V153RF-JYKQ01005032.1-igkv |(9334, 9634)|2.99899600001|(1.000,0.999,1.000)|-1
-TTGQVILTQSPATLSLSPGERATLSCRASQSVS--------SNLAWYQQKPGQAP---R
LLIYG-------AS--SRATGIPDRFSGSG--SGTEFTLT------IS-SLEPEDFAVYY
CQKYSSSP--
>V155RF-JYKQ01005033.1-igkv |(2883, 3181)|2.85065853484|(0.999,0.895,0.999)|-1
-SKGEIVLTQSPAFRSVTLKEKVTITCQASQSIG--------SSLHWYQQKPDQSP---K
LLIKY-------AS--QSISGVPSRFSGSG--SGTDFTLT------IN-SLEAEDAATYY
CQQSRSF---
>V156RF-JYKQ01005040.1-igkv |(7064, 7364)|2.9007472372|(0.999,1.000,0.924)|-1
-TRCAIQMTQSPSSLSASVGDRVTITCRASQSI------G--SNLAWYQQKPGKVP---K
LLIYA-------AS--TLQSEVPSRFSGSG--SGADFTLT------IS-SLQPEDVATYY
CQKCDSAP--
>V157RF-JYKQ01005045.1-igkv |(2627, 2942)|2.920828921|(0.994,1.000,0.939)|-1
-SSGDIVMTQTPLSLPVTPGEPASISCRSSQSLLHS-DGY--TYLDWYLQKPGQSP---Q
LLIHG-------GS--NRASGVPDRFSGSG--SGTDFTLK------IS-KVEAEDVGVYY
CMQHRALP--
>V158RF-JYKQ01005048.1-igkv |(219, 521)|2.97341305243|(1.000,0.994,0.981)|-1
-SSGDVVMTQSPLSLPVTPGQPASISCRSSQSLVHS-NGN--TYLSWLQQKPGQPP---R
LLIYK-------VS--NRDSGVPDRFSGSG--AGTDFTLK------IS-RVEAEDVGVYY
CVQV------
>V159RF-JYKQ01015003.1-ighv |(1329, 1641)|3.0|(1.000,1.000,1.000)|-1
-VLSQVQLQESG-PGLVKPSETLSLTCAVSGGSI----SG-SYGWNWIRQPPGKGL---E
WIGRIYGS--SGNT--YYNPSLKSRVTISRDTSKNQFSLK------LS-SVAAADTAVYY
CAR-------
>V160RF-JYKQ01015024.1-ighv |(3039, 3348)|2.90767205249|(0.972,0.973,0.963)|-1
-AHSQEQLVQSG-AEVKKPGASVKVSCKASGYIF----TG--YIISWLRQAPGQGF---E
WMGGIHP--GYGST--SYAQKFQGRVTMTGDTSTSTVYME------LS-SLRSEDTAMYY
CAA-------
>V161RF-JYKQ01015026.1-ighv |(1663, 1972)|2.99596000066|(1.000,0.997,0.999)|-1
-AHSEMQLVQSE-AEVKKPGASVKVSCKASGYTF----TY--RYLHWVRQTPGQGL---E
WMGWITP--YNGNT--NYAQKFQGRVTITRDRSMSTAYME------LS-SLRSEDTAVYY
CAR-------
>V162RF-JYKQ01026643.1-trav |(15229, 15519)|2.88542445559|(0.975,0.935,0.982)|-1
-VSSEDKVMQNPLSLVVHEGDTVTLNCSYEVAN------F--RSLLWYKQEK-KAP---I
FLFTLT-S--SGI------EKKSGRLSSILDKKDLYSILN------IT-ATQTRDSAVYL
CAVE------
>V165RF-JYKQ01026655.1-trav |(5208, 5498)|2.85597825001|(0.972,0.950,0.940)|-1
--TIIDAKTTQPTSMDCAEGRAANLPCNHSTIS-----GS--EYVYWYRQIHSQEP---Q
YVIHGL-K--NNETNVMAS------L--IITEDRKSSTLI------LP-HATLRDTAVYY
CIVRG-----
>V166RF-JYKQ01026663.1-trav |(902, 1202)|2.97230822856|(0.996,0.994,0.983)|-1
-SSVAQKVTQTQSSVSMPVEKAVTLNCQYETSRW----S---YYLFWYKQPPSKEM---I
FLIRQG-S--SEP-----NA-KSGRYSVNFQKAASSIALT------IS-ALQLEDSATYF
CALWE-----
>V167RF-JYKQ01026665.1-trav |(1710, 2010)|2.97398400013|(0.992,0.992,0.990)|-1
-SSVAQKVTQAQSSVSMPVGKAVTLNCQYETSWW----S---YDLFWYKQPPSKEM---I
FLIRQG-Y--SEQ-----NA-RNGRYSVNFQKAASSIALT------IS-ALQLEDSATYF
CALRE-----
>V168RF-JYKQ01042840.1-ighv |(1682, 1994)|2.7588467507|(0.974,0.863,0.970)|-1
-VLSQLQLQESG-PGLVRPSETLSLICTVSGGSI----SD-SYYWNWIRQPPGKGL---E
WIGNIYGG--GGST--NYNPSLKSRVTISKDASKNQFSLK------LS-SVTAADTAVYY
CAR-------
>V169RF-JYKQ01042857.1-ighv |(1035, 1344)|2.9700882474|(1.000,1.000,0.973)|-1
-AQSQVQLVQSG-AEVKKPGASVKLSCKASGFTF----GS--YAISWVRQAPGQGL---E
WMGEIIP--AFGIA--DYAQKFQGRVTITADTSTNTAYME------LS-SLRSEDTAVYY
CAR-------
>V171RF-JYKQ01042861.1-ighv |(9368, 9683)|3.0|(1.000,1.000,1.000)|-1
-VQCEVQLVESG-GGLVQPGGSLRLSCAASGFTF----SD--YYMYWVRQAPGKGL---E
WVGFIRSKAYGGTA--EYAASVKGRFTISRDDSKSIASLQ------MN-SLRAEDTAVYY
CTR-------
>V172RF-JYKQ01044654.1-igkv |(1250, 1550)|3.0|(1.000,1.000,1.000)|-1
-ARCDIQMTQSPSSLSASVGDKVTITCHASQGI------S--SWLAWYQQKPGKAP---K
PLIYK-------AS--SLQSGVPSRFSGSG--SGTDFTLT------IS-SLQPEDFATYY
CQQNSSSP--
>V174RF-JYKQ01044662.1-igkv |(2570, 2870)|3.0|(1.000,1.000,1.000)|-1
-AKCDIQMTQSPPSLSASVGDRVTITCRASQGI------S--NWLAWYQQKPGEAP---K
LLIYA-------AS--TLQSGVPSRFSGSG--SGTEFTLT------IS-SLQPEDFATYY
CQQHNSYP--
>V175RF-JYKQ01052437.1-igkv |(14196, 14511)|2.89579292281|(0.995,0.938,0.977)|-1
-SSGDVVMTQSPLSLPVTPGQPASISCRSSQSLVHS-NGN--TYLNWFQQKPGQPP---R
LLIYK-------VS--NRYSGVPDRFSGSG--AGTDFTLK------IS-RVEAEDVGIYY
CMQSIHLP--
>V176RF-JYKQ01052439.1-igkv |(123, 425)|2.99799200002|(1.000,0.999,0.999)|-1
-SSGDVVMTQSPLSLSVTIGQPASISCRSSQSLVHS-DGK--TYLNWLQQKPGQPP---R
RLIYQ-------VS--NRDSGVPDRFSGSG--AGTDFTLK------IS-RVETEDVGVYY
CVQG------
>V177RF-JYKQ01052440.1-igkv |(29428, 29728)|2.99899600001|(1.000,1.000,0.999)|-1
-ARCDIQLTQSPSSLSASVGDRVTITCQASQGI------S--NNLAWYQQKPGKVP---K
LLIYA-------AS--TLQSGVPSRFSGSG--SGTDFTLT------IS-SLQPEDFATYY
CQHGYGTP--
>V178RF-JYKQ01052440.1-igkv |(44786, 45101)|2.91174548772|(0.997,0.933,0.998)|-1
-SSGDIVMTQTPFSLPVTPGEPASISCRSSQSLLHS-DGR--TYLYWYLQKPGQPP---R
LLIYR-------VS--NRFSGVPDRFSGSG--SGTDFTLK------IS-RVEAEDVGVYY
CMQALQNP--
>V179RF-JYKQ01052440.1-igkv |(49779, 50094)|2.96917355698|(0.996,1.000,0.975)|-1
-SSGDIVMTQTPLSLPVTPGEPASISCRSSQSLLHS-NGN--TYLHWYLQKPGQSP---Q
LLFYG-------GS--NRASGVPDRFSGSG--SGTDFTLK------IS-KVEAEDVGVYY
CVQAIAFP--
>V180RF-JYKQ01052440.1-igkv |(68584, 68899)|2.9783881665|(0.998,0.986,0.995)|-1
-SSGDIVMTQTPLSLPVTAGEPASISCRSSQSLLHS-NGN--TYLYWYLQKPGQPP---W
LLIYR-------VS--NRFSGVPDRFSGSG--SGTDFTLK------IS-RVEAEDVGVYY
CMQALQTP--
>V181RF-JYKQ01052440.1-igkv |(90005, 90305)|3.0|(1.000,1.000,1.000)|-1
-ARCDIQMTQSPSSLSASVGDRVTITCRASQGI------S--NYLNWYQQKPGKAP---K
LLIYR-------AS--NLETGVPSRFSGSG--SGTDFTLT------IS-SLQPEDIATYY
CQKHDNSP--
>V182RF-JYKQ01052440.1-igkv |(99434, 99748)|2.73598890153|(0.991,0.988,0.842)|-1
-SSGDVVMTQTPLSLPVTPGEPASISCRSSQSLLHS-NGN--TYLHWYLQKPGQSP---R
LLIYK-------VT--NRESGVPDRFSGSG--SGTDFTLK------IS-RVEPEDVGVYY
CMQNTKAP--
>V183RF-JYKQ01052440.1-igkv |(120035, 120335)|3.0|(1.000,1.000,1.000)|-1
-ARCDIQMTQSPSSLSASIGDRVTITCRASQNI------Y--SNLAWYQQKPGKAP---K
PLIYY-------AS--SVETGVPSRFSGSG--SGTDYTLT------IS-SLQPEDVATYY
CQQYDNSP--
>V184RF-JYKQ01052441.1-igkv |(8581, 8881)|3.0|(1.000,1.000,1.000)|-1
-ARCDILMTQSPASLSASVGDRVTITCRASQGI------S--NYLAWYQQKPGETP---K
LLIYA-------AS--SLQSGIPSRFSGSG--SGTDFTLT------IS-SLQPEDFATYY
CQHYYSTP--
>V185RF-JYKQ01052442.1-igkv |(12441, 12756)|2.98972803289|(1.000,0.998,0.992)|-1
-TSGDIVMTQTPLSLPVTPGEPASISCRSSQSLLHS-GGK--TYLYWYLQKPGQSP---Q
LLIQE-------VS--NRASGVPDRFSGSG--SGTDFTLK------IS-RVEAEDVGVYY
CMQGIQLP--
>V186RF-JYKQ01052443.1-igkv |(11550, 11850)|3.0|(1.000,1.000,1.000)|-1
-ARCDIQMTQSPSSLSASVGDRVTITCQASQSL------S--NYLNWYQQKPGKIP---K
LLIYG-------AS--SLQSGIPSRFSGSG--SGTDYTLT------IS-SLQPEDFATYY
CQQGYSNP--
>V187RF-JYKQ01052443.1-igkv |(27506, 27821)|2.99174403277|(1.000,0.992,1.000)|-1
-TSGDIVMTQTPLSLPVTLGEPASISCRSSQSLLHS-DGY--TYLDWYVQKPGQSP---Q
LLIYL-------VS--NRASGVPDRFSGSG--SGTDFTLK------IS-RVEAEDVGVYY
CMQGTQLP--
>V188RF-JYKQ01052444.1-igkv |(11183, 11498)|2.98356408064|(0.997,0.987,1.000)|-1
-YSGDIVMTQTPLSLPVIPGEPASISCRSSQSLLDS-DGY--TCLDWYLQKPGQSP---Q
LLIYE-------VS--NRASGVPDRFSGSG--SGTDFTLK------IS-RVEAEDVGVYY
CMQSIEFP--
>V190RF-JYKQ01052444.1-igkv |(27757, 28057)|3.0|(1.000,1.000,1.000)|-1
-ARCDIQMTQSPSSLSASVGDRVTITCRASQGI------N--KELAWYQQKPGKAP---M
LLLYS-------GS--SLHTGVPSQFSGSG--SGTDFTLT------IS-SLQPEDVATYY
CRQDYTTP--
>V191RF-JYKQ01052444.1-igkv |(35903, 36218)|2.97670083945|(0.999,0.981,0.998)|-1
-SSGDIVMTQTPLSLPVTPGQPASISCRSSQSLLHS-DGY--TYLHWYLQKPGQSP---R
LLIYL-------VS--NRASGVPDRFSGSG--SGTDFTLK------IS-RVETEDVGVYY
CMQTLQTP--
>V192RF-JYKQ01052444.1-igkv |(45830, 46130)|2.99899600001|(1.000,0.999,1.000)|-1
-ARCDIQMTQSPSSLSASVGDRVTITCRASQGI------G--NYLAWYQQKPGETP---K
LLIYA-------AS--SLQSGIPSRFSGSG--SGTDYTLT------IS-SLQPEDFATYY
CQQGYSNP--
>V193RF-JYKQ01052444.1-igkv |(60842, 61157)|2.99498400013|(0.999,0.999,0.997)|-1
-TNGDIVMTQTPLSLPVTPGEPASISCRSSQSLLHS-DGK--TYLHWYLQKPGQSP---Q
LLIYL-------VS--NRASGVPDRFSGSG--SGTDFTLK------IS-RVEVEDVGVYY
CEQGTQLP--
>V194RF-JYKQ01052450.1-igkv |(9881, 10181)|2.99899600001|(1.000,0.999,1.000)|-1
-ARCDIQMTQSPSSLSASVGDRVTITCRASQSI------N--KELDWYQQKPGKAP---T
LLIYA-------AS--SLQTGVSSRFSGSG--SGTDFTLT------IS-SLQPEDVATYY
CQQDYTTP--
>V195RF-JYKQ01052451.1-igkv |(138372, 138687)|2.97739727933|(1.000,0.980,0.999)|-1
-SRGDIVMTQTPLSLPVTPGEPASISCRSSQSLLHS-NGY--TYLHWYLQKPGQSP---Q
LLIYL-------GS--NRASGVPDRFSGSG--SGTDFTLK------IS-RVEAEDVGVYY
CEQTLQTP--
>V196RF-JYKQ01056010.1-ighv |(10615, 10921)|3.0|(1.000,1.000,1.000)|-1
-VQCEVQLVESG-GGLVQPGGSLRLSCAASGFTF----SS--YAMQWVHQAPGKGL---E
WVSAIGP--G-GDT--YYADAVKGRFTISRDNAKNSLYLQ------MN-SLRAEDTAVYY
CAR-------
>V197RF-JYKQ01056018.1-ighv |(1836, 2148)|2.92500040988|(0.982,0.967,0.977)|-1
-VLSQVKLQQWG-EGLVKPSETLSLTCAIYGGSI----S-GYYYWSWIRQPPGKGL---E
WIGNIYGG--GGST--NYNPSLKNRVTISKDTSKNQFSLK------LS-SVTAADTAVYY
CAR-------
>V198RF-JYKQ01062878.1-ighv |(882, 1191)|3.0|(1.000,1.000,1.000)|-1
-VQCEVQLVESG-GGLVKPGASLRLSCAASGFTF----SS--YGMHWVRQAPGKGL---E
WVSYISS--DSSYI--YYADSVKGRFTISRDNAKNSLSLQ------MN-SLKTEDTAVYY
CAR-------
>V199RF-JYKQ01062881.1-ighv |(1585, 1894)|2.99899600001|(1.000,1.000,0.999)|-1
-AHSQVQLVQSG-AEVKKPGSSVKVSCKASGYTF----TD--YYMQWVRQAPGQGL---E
WMRWINP--YNGNT--KYAQKFQGRVTMTRDTSTSTAYME------LS-SLRSEDTAVYY
CAT-------
>V200RF-JYKQ01062881.1-ighv |(4488, 4803)|2.98684833171|(0.988,1.000,1.000)|-1
-VQCEVQLVESG-GGLVQPGGSLRLSCAASGFTF----SN--HCMSWVRQAPGKGL---E
WVGFIRNKAKGGTA--EYAASVKGRFTISRDDSKSIAILQ------MN-SLKTEDTAMYY
CTR-------
>V201RF-JYKQ01062939.1-trav |(3077, 3367)|2.30267048273|(0.903,0.678,0.905)|-1
--TIIDAKTTQPTSMDCAEGRAANLPCNHSAIS-----AN--EYIHWYRQIHSQGP---Q
YVIHGL-K--DNETNAMAS------L--IITEDRKSSTLI------LP-HATLRDTAVYY
CILRV-----
>V202RF-JYKQ01066660.1-trav |(3004, 3294)|2.66546075075|(0.931,0.813,0.989)|-1
--TIIDAKTTQPTSMDCAEGRAANLPCNHSTIG-----GN--EYIHWYRQIHSQGP---Q
YVIHGL-K--NNETNAMAS------L--IITEDRKSSTLI------LP-HATLRDTAVYY
CIVRV-----
>V204RF-JYKQ01066669.1-trav |(750, 1050)|2.97398400013|(0.992,0.992,0.990)|-1
-SSVAQKVTQAQSSVSMPVGKAVTLNCQYETSWW----S---YDLFWYKQPPSKEM---I
FLIRQG-Y--SEQ-----NA-RNGRYSVNFQKAASSIALT------IS-ALQLEDSATYF
CALRE-----
>V206RF-JYKQ01075085.1-igkv |(254, 554)|2.994900005|(1.000,0.995,1.000)|-1
-ARCDIQMSQSPPSLSASVGDRVTITCQACQGI------S--NYLAWYQQKPGKAP---K
LLIYA-------AS--TLQSGVPSRFSGSG--SGTEFTLT------IS-SLQPEDFATYY
CQQRNSYP--
>V207RF-JYKQ01076935.1-igkv |(39827, 40127)|3.0|(1.000,1.000,1.000)|-1
-ARCDIQMTQSPSSLSASVGDTVTITCQASQGI------S--DYLAWYQQKPGKAP---K
LLIYA-------AS--NLESGVPSRFSGSG--SGTEFTLT------IS-SLQPEDFATYY
CQQYDSDP--
>V208RF-JYKQ01076937.1-igkv |(20686, 20986)|2.9969280013|(0.997,1.000,1.000)|-1
-ARCDIQMSQSPSSLSASVGDRVTITCRASQGI------S--NALAWFQQKPGKAP---K
LLIYA-------AS--SLQSGVPSRFSGSG--SGTDYTLT------IS-SLQPEDFATYY
CQQGYSTP--
>V209RF-JYKQ01076937.1-igkv |(32283, 32583)|3.0|(1.000,1.000,1.000)|-1
-ARCDIQMTQSPSSLSASVGDRVTITCRASQGI------S--SYLNWYQQKPGKAP---K
LLIYY-------AT--SLESGVPSRFSGSG--SGTEFILT------IS-SLQPEDFATYY
CQQHNSYP--
>V210RF-JYKQ01076937.1-igkv |(51727, 52015)|2.97896052424|(0.998,0.982,1.000)|-1
-----IVMTQSPATLSLSLGETATISCRTSQSVG--------RKLAWYQQKPGQAP---R
LLIYG-------AS--SRATGIPDRFSGSG--SGTDFTLT------IS-SLEPEDFAVYY
CQETSNLS--
>V212RF-JYKQ01080923.1-iglv |(36388, 36694)|3.0|(1.000,1.000,1.000)|-1
-SWAEVVFTQPH-SVSGSPGQTVTISCTRSSGSI---D-S--KYVQWYQQRPGSAP---T
TVIYE-------DN--KRPSGVPDRFSGSIDSSSNSASLT------IS-GLKSEDEADYY
CQSADGS---
>V214RF-JYKQ01081225.1-igkv |(3273, 3573)|3.0|(1.000,1.000,1.000)|-1
-ARCDIQMTQSPSSLSASVGDKVTITCQASQSI------S--SWLTWYQQKPGKAP---K
LLIYK-------AS--TLQSGVPSRFSGSG--SGTEFTLT------IS-SLQPEDFATYY
CQQFSSAP--
>V216RF-JYKQ01098166.1-iglv |(974, 1284)|2.5210290517|(0.984,0.938,0.772)|-1
-SLSQPMLTQPA-SLSASPGASASLTCTFSGGIN---VAG--YYIYWYQQKPGSPP---R
YLLKYK-S--DSDK--HQGSGVPSRFSGSKDASANTGILR------IS-GLQSEDEADYY
CAI-------
>V217RF-JYKQ01126545.1-iglv |(13640, 13950)|2.99598400013|(0.998,1.000,0.998)|-1
-SWAQAALTQPP-SVSGSPGQSVTISCTGTSSDI---GGY--NYVSWYQQHPGKAP---K
LMIYD-------VS--KRPSGVSDRFSGSK--SGNTASLT------IS-GLQAEDEADYY
CSSYASSST-
>V218RF-JYKQ01126545.1-iglv |(37360, 37652)|2.97766884009|(1.000,0.982,0.997)|-1
----SYELTQPP-SVSVSPGQTARITCSGD--A----LPE--KYAYWYQQKPGQSP---V
LIIYE-------DS--KRPSGIPERFSGSS--SGTVATLT------IS-GAQVEDEADYY
CYSADSSGN-
>V220RF-JYKQ01126545.1-iglv |(48188, 48491)|3.0|(1.000,1.000,1.000)|-1
-SWAQAALTQPH-SVSGSPGQSVTISCTGTSSDI---GGY--DRVSWYQQHPGKAP---K
LMIYE-------VS--KRPSGVSDRFSGSK--SGNTASLT------IS-GLQAEDEADYY
CSSYAGS---
>V221RF-JYKQ01126545.1-iglv |(71572, 71866)|2.99396400065|(0.999,0.996,0.999)|-1
----QSALIQSP-SVSGSLGQSVTISCTGTSSDI---GRY--NYVSWYQQQPGTTT---K
LMMYN-------VN--TRPSGVSDRFSGSK--SGNTASLT------IS-GLQAEDEADYY
CSSYEAS---
>V222RF-JYKQ01126546.1-iglv |(14999, 15296)|2.93293283577|(0.995,0.953,0.992)|-1
-SVASYELTQPP-SVSVSPGQTAKITCSGD--V----LAK--YYAHWFQQKPGQAP---V
LVIYK-------DS--ERPSGIPERFSSSS--SGTTVTLT------IS-GAQAEDEADYY
CYSGDDNN--
>V223RF-JYKQ01126546.1-iglv |(24524, 24827)|3.0|(1.000,1.000,1.000)|-1
-SWAQSALTQPP-SVSGSPGQSVTISCTGTSSDV---GGY--SYVSWYQQHPGKAP---K
LMIYG-------VS--NRPSGVSDRFSGSK--SGNTASLT------IS-GLQAEDEADYY
CCSYTTS---
>V224RF-JYKQ01126546.1-iglv |(36976, 37279)|2.98859608|(1.000,0.990,0.999)|-1
-SAASYDLTQPP-SVSVSPGQTARITCGGD--N----IES--EAVHWYQQKPPQAP---V
LVIYA-------DS--ERPSGIPERFSGSK--SGNTATLT------IS-GVEAGDEADYY
CQMWDSSSKH
>V226RF-JYKQ01126546.1-iglv |(60437, 60740)|2.99899600001|(1.000,0.999,1.000)|-1
-SAASYDVTQPR-SVSVSPGQTARITCGGD--N----IGS--KYVQWYQQKPAQAP---V
LVIYD-------NS--DRPSGIPERFSGSN--SGNTATLT------IS-GVEAGDEADYY
CQVWDSSSDH
>V228RF-JYKQ01126546.1-iglv |(71769, 72072)|2.99389600501|(1.000,0.999,0.995)|-1
-SWAQAALTQPP-SVSGSPGQSVTISCTGTSNDV---GGY--NYVSWYQQHPGKAL---K
LMIYE-------VS--KRPTGVSDRFSGSK--SGNTASLT------IS-GLQAEDEADYY
CGSYSGS---
>V230RF-JYKQ01126546.1-iglv |(89596, 89899)|2.94926378359|(1.000,0.969,0.985)|-1
-SAASYDVTQPR-SVSVSPGQTARITCGGD--S----IGS--KVVNWYQQKPAQAP---V
LVIYA-------DS--VRPSGIPERFSGSN--SGNTATLT------IS-GIEAGDEADYY
CQVWDSSSDH
>V231RF-JYKQ01126546.1-iglv |(116413, 116723)|2.98780001921|(0.998,0.999,0.991)|-1
-SWAQSALTQPP-SVSGSPGQSVTISCTGTSSDV---GGY--NYVSWYQQHPGKAP---K
LMIYE-------VS--KRPSGVSDRFSGSK--SGNTASLT------IS-GLQAEDEADYY
CSSYRSSNT-
>V233RF-JYKQ01126579.1-iglv |(22005, 22315)|2.80343436606|(0.998,0.995,0.872)|-1
-SLSQPVLTQPA-SLSASPGASASLTCTFSGGIN---VAG--YYIHWYQQKPGSPP---R
YLLRYK-S--DSDK--HQGSGVPSRFSGSKDASANTGILR------IS-GLQSEDEADYY
CAI-------
>V234RF-JYKQ01126579.1-iglv |(26551, 26860)|2.85288748934|(0.979,0.928,0.958)|-1
-SWAQSVLTQPR-SASEAARKSVTISCSGSSSNI---G-S--NYVSWYQQLPETAP---K
LLIYY-------DD--LRASGVSDRFSGSK--SGTSASLA------IS-GLQTEDEADYY
CAAWDDSLSG
>V236RF-JYKQ01126580.1-iglv |(2043, 2350)|2.99280401921|(1.000,1.000,0.993)|-1
-SWAQSVLTQPP-SVSGDPGQRVTISCTGSSSNI---G-G--YDVYWYQQVPGTAP---K
LLIYD-------NN--KRPSGVSDRFSGSK--SGTSASLT------IT-GLQTEDEADYY
CQSYDSSLS-
>V237RF-JYKQ01126580.1-iglv |(7851, 8158)|2.99383600705|(0.995,1.000,0.999)|-1
-SWAQSVLTQPP-SVSGAPGQKVTISCTGSSSNI---G-G--YNVYWYQLLPGTAP---K
LLIYD-------NN--KRPSGISDRFSGSK--SGTSASLA------IT-GLQSEDEADYY
CQSYDSSLS-
>V238RF-JYKQ01126581.1-iglv |(5729, 6039)|2.99285201038|(1.000,0.999,0.994)|-1
-SLSQPVLTQPA-SLSASPGASARLTCTLSSGIN---VGS--YSIYWYQQKPGSPP---R
YLLYYY-S--DSDK--HQGSGVPSRFSGSKDASANAGLLL------IS-GLQSEDEADYY
CAI-------
>V239RF-JYKQ01126581.1-iglv |(16324, 16633)|2.95764947362|(0.998,0.965,0.999)|-1
-SWAQSVLTQPP-SVSAAPGQRVTISCSGSSSNI---G-R--GYVSWYQQLPGTAP---K
LLIYD-------NN--KRPSGISDRFSGSK--SGNSASLT------IT-GLQTGDEADYY
CGAWDSSLSA
>V240RF-JYKQ01126581.1-iglv |(20501, 20808)|3.0|(1.000,1.000,1.000)|-1
-SWAQSVLTQPP-SVSGAPGQRVTISCTGSSSNI---G-G--YYVQWYQQLPGTAP---K
LLIYG-------NN--KRPSGVSDRFSGSQ--SGTSASLA------IT-GLQSEDEADYY
CEAWDNSLS-
>V241RF-JYKQ01126585.1-iglv |(7447, 7757)|2.93279088874|(1.000,0.947,0.997)|-1
-SLSQPVLTQPA-SLSASPGASVRLTCTLRSGIS---VGG--YNIHWYQQKPGSPP---R
YLLYYY-S--DSNK--GQGSGVPSRFSGSKDASANAGILL------IS-GFQSEDEADYY
CTT-------
>V242RF-JYKQ01126585.1-iglv |(12290, 12599)|2.99899600001|(1.000,1.000,0.999)|-1
-SWAQSVLTQPP-SASGAPGQRVTISCSGSSSNI---G-S--NYVSWYQQLSGKAP---K
LLIYK-------NN--QRPSGVPDRFSGSK--SGNSASLA------IS-GLQSEDEADYY
CAAWDDSLSG
>V243RF-JYKQ01126586.1-iglv |(1288, 1598)|2.90576213034|(1.000,0.964,0.955)|-1
-SLSQPMLTQPA-SLSASPGASASLTCTFSGGIN---VAG--YYIHWYQQKPGSPP---R
YLLRYK-S--DSDK--HQGSGVPSRFSGSKDASANTGILR------IS-GLQSEDEADYY
CAI-------
>V244RF-JYKQ01126586.1-iglv |(6152, 6459)|2.86145858986|(0.945,0.997,0.931)|-1
-SWAQSVLTQPP-SASGAPGQSVTISCSGSSSNI---R-G--NGVHWYQQLSGTAP---K
LLIYN-------NN--QRPSGVPDRFSGSK--SGTSASLT------IT-GLRSEDEAHYY
CEAWDNSLS-
>V245RF-JYKQ01126589.1-iglv |(2854, 3164)|3.0|(1.000,1.000,1.000)|-1
-SWAQSVLTQPP-SVSGAPGQRVTISCTGSSSNI---GAG--YYVQWYQQLPGTAP---K
LLIYE-------NN--KRPSGVTDRFSGSK--SGTSASLT------IT-GLQSEDEADYY
CQSYDSSLS-
>V246RF-JYKQ01126589.1-iglv |(33453, 33763)|2.83794289672|(1.000,0.898,0.982)|-1
-SLSQPVLTQPT-SLSASPGASARLTCTLRSGIS---VGS--YRIYWYQQKPGSPR---R
YLLNYY-S--DSDK--HQGSGVPSRFSGSKDASANAGILL------IS-GLQPEDEADYY
CMI-------
>V247RF-JYKQ01126589.1-iglv |(38258, 38567)|2.99798400013|(1.000,0.998,1.000)|-1
-SWAQSVLTQPP-SASGAPGQRVTISCSGSSSNI---G-S--NYVYWYQQFPGTAP---K
LLIYY-------SN--QRPSGVPDRFSGSK--SGTSASLA------IT-GLQSEDEADYY
CAAWDNSLSG
>V249RF-JYKQ01187338.1-igkv |(11159, 11459)|2.91750221476|(0.956,1.000,0.970)|-1
-TTGQVILTQSPATLSLSPGERATLSCRASQSVS--------SYLAWYQQKPGQAP---R
LLIHS-------VS--SRATGIPDRFSGSG--SGTEFTLT------IS-SLEPEDVGVYH
CYQHSSGY--
>V250RF-JYKQ01187347.1-igkv |(14093, 14411)|2.99899600001|(1.000,1.000,0.999)|-1
-ACGDIVMTQSPDSLAVSLGERVTINCKSSQSLLYSSNNK--NYLAWYQQKPGQAP---K
LLISW-------AS--TRESGVPNRFSGSG--SGTDFTLT------IS-GLQAEDVAVYY
CQQHYSSP--
>V251RF-JYKQ01237599.1-ighv |(479, 788)|3.0|(1.000,1.000,1.000)|-1
-VQGEVQLVESG-GGLSKPGGSLRLSCAASGFTF----SD--YNMHWVRQASGKGL---E
WVSGISND--GGST--WYADSVKGRFTISRENAKNTLYLQ------MN-SLRAEDTAVYY
CAG-------
>V0RF-JABR01013263.1-trbv |(179, 479)|2.98899600001|(0.996,0.997,0.996)|1
--HMGAGVSQSPRYKVTKKGQDVVLSCDPISGH---------EALYWYQQALGQGP---K
FLTYFN-Y--EAQP--DKSGLPNDRFSAERPK-GSVSTLT------IQ-RTEQRDSAVYL
CASSL-----
>V3RF-JABR01016432.1-iglv |(27490, 27800)|2.90622464915|(0.984,0.982,0.946)|1
-SLSQPVLTQPT-SLSASPGASARLTCTLSSGIN---VGS--YRIFWYQQKPGSPP---R
YLLWYK-S--DSDK--HQGSGVPSRFSGSKDASANAGILR------IS-GLHSEDEADYY
CTI-------
>V4RF-JABR01016432.1-iglv |(31781, 32090)|2.99496000066|(0.997,0.998,1.000)|1
-SWAQSVLTQPP-SASGPPGQSVTISCSGSSSNI---G-S--NYVYWYQQLSGKAP---K
LLIYD-------NN--KRPSGVPDRFSGSK--SGTSASLA------IS-GLQTEDEADYY
CAAWDDSLSG
>V5RF-JABR01020048.1-igkv |(1483, 1801)|2.96319965751|(0.999,0.994,0.973)|1
-AYGDIVMTQSPDSLAVSLGERVTINCKSSQSLLYSSNNK--NYLAWYQQKPGQAP---K
LLIYW-------AS--TRESGVPNRFSGSG--SGTDFTLT------IS-GLQAEDMAVYY
CQQYYSTP--
>V6RF-JABR01043229.1-iglv |(142541, 142835)|2.9889000027|(0.994,0.997,0.998)|1
------VVTQEP-LLSVSSGGTVAITCGLSSGPV---STS--NYPSWYQQTPGQAP---R
TLIYS-------TN--TRPSGVPDRFSGSI--LGNKAALT------IT-GAEADDESDYY
CVLYMGSGI-
>V9RF-JABR01052882.1-trgv |(88181, 88494)|2.93724228261|(1.000,1.000,0.948)|1
-SQKSSNLEGRTKSVTRPTGSSAEITCDFSGD------SN--FYIHWYLHQEGKAP---Q
RLLYYD-V--SNSRDVLESGLSLGKYYTHT-RTRWSWILI------LR-NLIENDSGVYY
CATWD-----
>V10RF-JABR01059011.1-ighv |(294, 609)|3.0|(1.000,1.000,1.000)|1
-VQCEVQLVESG-GGLVQPGGSLRLSCAASGFTF----SN--YHMSWVRQAPGKGL---E
WVGFIRNKASGGTA--EYAASVKGRFTISRDDSKSITYLQ------MN-SLKTEDTAVYY
CAR-------
>V11RF-JABR01059011.1-ighv |(15565, 15872)|2.99398000014|(0.997,0.999,0.998)|1
-VQCEVQSVESG-GGLVQPGGSLRLSCAASGFTF----SS--YWMSWVRQAPGKGP---E
WVSDIS----GSTI--YYADSVKGRFTVSRDDAKNSLSLQ------MD-SLRAEDTAVYY
CARE------
>V13RF-JABR01059012.1-ighv |(17062, 17386)|2.91548902774|(0.998,0.987,0.943)|1
-AHSQVQLVQSG-AEVKQPGASVKVSCKASGYTF----TS--YAMNWVRQAHGQRL---E
WIGWINT--NTGNP--TYAQGFKERFAFSMDTSISTAYLQ------IS-SLKAEDTAVYY
CARDTVWK--
>V14RF-JABR01062345.1-ighv |(2435, 2744)|2.97274003277|(0.994,0.993,0.986)|1
-AQSQEQLVQSG-AEVKKPGASVKVSCKASGFTF----SS--DAISWVRQAPGQGL---E
WMGRIIP--ILSRT--NYAQKFQGRVTITADTSTSTAYME------LS-SLRSEDTAVYY
CAR-------
>V15RF-JABR01066987.1-ighv |(11840, 12146)|3.0|(1.000,1.000,1.000)|1
-VQCEVQLTESG-GGLVQPDGSLRLSCAASGFTF----SS--YAMQWVHQAPGKGL---E
WVSAIGPG--G-DT--YYADAVKGRFTISRDNTKNSLYLQ------MN-SLRAEDTAVYY
CAR-------
>V16RF-JABR01066987.1-ighv |(19343, 19652)|2.96456408064|(0.986,0.996,0.983)|1
-AHSQEQLVQSG-AEVKKPGASVKVSCKASGFTF----DS--SAISWVRQAPGQGL---E
WMGVIIP--VAGIT--NYAQKFQGRVTITADTSTSTAYME------LS-SLRSEDTAMYY
CAA-------
>V18RF-JABR01070187.1-ighv |(7644, 7959)|2.98778801933|(0.993,1.000,0.995)|1
-VQCEVQLVESG-GGLVQPGGSLRLSCAASGFTF----SD--YYMQWVRQAPGKGL---Q
WVGLIRNKANGGTT--DYSVSVKGRCTISRDDSKSITSLQ------MN-SLKTEDTAVYY
CAR-------
>V19RF-JABR01070187.1-ighv |(14433, 14739)|2.99899600001|(1.000,0.999,1.000)|1
-VQCEMQLVESG-GGLVQPGGSLRLSCAASGFTF----SS--YDMHWVRQAPGKGL---E
WVSAISI--G-GGT--YYPDSVKGRFTISRDNAKNSLYLQ------MN-SLRAEDMAVYY
CAR-------
>V20RF-JABR01071886.1-ighv |(1825, 2139)|2.79648409597|(0.941,0.895,0.973)|1
-VWSQVTLKESG-PALVKPSQTLTLTCTFSGFSI----STSGTGVGWIRQPSGKAL---E
WLASIYW---NDSK--YYSTSLKSRLTISKDTSKNQVVLT------MT-NMDPVDTATYY
CAHI------
>V21RF-JABR01074704.1-ighv |(2136, 2448)|2.99899600001|(1.000,1.000,0.999)|1
-VLSQVQLQESG-PGLVKPSETLSLTCAVSGGSI----SS-YNYWSWIRQPPGKGL---E
WIGHIYGN--SAST--NYNPSLKSRVTISKDTSKNQFSLK------LS-SVTAADTAVYY
CAR-------
>V22RF-JABR01074958.1-ighv |(126, 441)|2.87758293044|(0.989,0.923,0.983)|1
-VQCEVQLVESG-GGLVQPGGPLRLSCAASGFTF----SD--YYMPWVRQAPGKGL---E
WVGHIKNKANSYTT--EYAASVKGRFTISRDDSKNTLYLQ------MN-SLKTEDTAVYY
CAT-------
>V23RF-JABR01076259.1-igkv |(8845, 9160)|2.99598000014|(0.999,0.997,1.000)|1
-SSGDIVMTQTPLSLPITVGETASISCRSSQSLLSS-NGY--NYLSWYLQKPGQSL---Q
LLIYY-------GS--NRASGVPDRFSGSG--SGTDFTLK------IS-RVEAEDIGVYY
CMQTLQTP--
>V24RF-JABR01076260.1-igkv |(856, 1158)|2.99696400065|(1.000,1.000,0.997)|1
-STGDVVMTQSPLSLPVTPGEPASISCRSSQSLLHS-SGN--TYLSWFQQKPGQSP---R
RLIYK-------VS--NRDSGVPDRFTGSG--AGTDFTLK------IS-RVEAEDVGVYY
CMEG------
>V25RF-JABR01076260.1-igkv |(17028, 17326)|2.89434102383|(0.999,0.920,1.000)|1
-SKGEIVLTQSPAFRSVTPKEKVTITCRASQSIG--------SSLHWYQQKPDQSP---K
LLIKY-------AS--QSISGVPSRFSGSG--SGTDFTLT------IN-SLEAEDAATYY
CQQSSSF---
>V26RF-JABR01076261.1-igkv |(12124, 12424)|2.84582226751|(0.997,0.892,1.000)|1
-TTGEIVLTQSPAILSLSPGERATFSCRASQSIG--------SNLAWYQQKPGQAP---R
LLIYG-------AS--SRATGIPDRFSGSG--SGTEFTLT------IS-SLEPEDFAVYY
CQKYSSSP--
>V27RF-JABR01076261.1-igkv |(17937, 18237)|2.84448691434|(0.982,0.961,0.919)|1
-VRCDIQMTQSPSFLSASVEDTVTITCQVSQSI------S--NDLAWYQQKPGKSP---T
LLIYD-------AT--NLHPGFPSRFSGSG--SGADYSLT------IS-SLELEDFAAYY
CQQEYSYP--
>V28RF-JABR01076261.1-igkv |(78882, 79179)|2.98232022844|(0.999,0.986,0.998)|1
--RCDIQMTQSPSSLSASVGDRVTITCRASQSF------S--SSLAWYQQKLGKAP---K
LLIYG-------AS--SLQSGIPSRFSGSK--SGTDFTLT------IS-SLQPEDVAAYY
CQQYYSYP--
>V30RF-JABR01076261.1-igkv |(111081, 111379)|3.0|(1.000,1.000,1.000)|1
-ARCDIQMTQSPSSLSASVGDRVTITCRASQGI------S--SYLNWYQQKPGKAP---K
LLIYA-------AS--SLASGVPSRFSGSG--SGTEFTLT------IS-SLQPEDFAAYY
CQQYNSA---
>V31RF-JABR01076261.1-igkv |(121606, 121906)|2.84105101919|(0.997,0.891,0.997)|1
-TTGEIVMTQSPATLSLSPGERATLSCRASQSA------G--SNLAWYQQKPRQAP---R
LLIYG-------AS--SRATGIPARFSGSG--SGTDFTLT------IS-SLEPEDVGIYY
CQQYNDWP--
>V32RF-JABR01076261.1-igkv |(164504, 164804)|3.0|(1.000,1.000,1.000)|1
-ARCDIQMSQSPSSLSASVGDRVTITCQASQGI------S--NALAWYQQKPGKAP---K
LLIYD-------AS--SLDSGVPSRFSGSG--SGTEFTLT------IS-SLQPEDFATYY
CQQYNSDP--
>V33RF-JABR01076263.1-igkv |(15350, 15650)|2.99699200002|(0.999,1.000,0.998)|1
-ARCDIQMTQSPSSLSASVGDRVTITCQASQGI------S--SYLSWYQQKPGKAP---K
LLIYK-------AS--SLASGVPSRFSGSG--SGTEFTLT------IS-SLQPEDFAAYY
CQQHNSLP--
>V34RF-JABR01076263.1-igkv |(29170, 29470)|2.78151560002|(0.999,0.920,0.915)|1
-ARCDIQMIQSPSSLPASVGDRVTITCRASQGI------S--SYLNWYQQKPGKAP---K
LLIYY-------AT--TLQSGVPSRFSGSG--SGTEFTLT------IS-SLQPEDFAAYY
CLQHNSDP--
>V35RF-JABR01076263.1-igkv |(35502, 35802)|3.0|(1.000,1.000,1.000)|1
-ARCDIQMTQSPSSLSASVGDRVTITCQASQGI------S--SWLAWYQQKPGKAP---K
LLIYK-------AS--SLQSGVPSRFSGSG--SGTEFTLT------IS-SLQPEDFATYY
CQQHNSNP--
>V36RF-JABR01076263.1-igkv |(51711, 52011)|2.99699200002|(0.999,0.998,1.000)|1
-TTGEIVMTQSPATLSLSPGERATLSCRASQSVS--------SRLVWYQQKHGQAP---T
LLIYG-------AS--SRATGIPARFSGSG--SGTDFTLT------IS-SLEPEDVGVYY
CQQDYSWP--
>V37RF-JABR01076263.1-igkv |(105623, 105923)|3.0|(1.000,1.000,1.000)|1
-ARCDIQMTQSPSSLSASVGDTVTITCQASQGI------S--SYLAWYQQKPGKAP---K
LLIYA-------AS--TLQSGVPSRFSGSG--SGTDFTLT------IS-SLQPEDFATYY
CQQYNSNP--
>V38RF-JABR01076263.1-igkv |(125399, 125698)|2.99796800026|(0.998,1.000,1.000)|1
-TTGEIVMTQSPATLSLSPGERATLSCRASQSVG--------SYLAWYQQKPGQAP---R
LLIYG-------AS--SRATGIPDRFSGSG--SGTEFTLT------IS-SLEPEDFAVYF
CQHYNNWN--
>V39RF-JABR01076264.1-igkv |(9604, 9904)|2.90358683121|(0.998,0.997,0.928)|1
-ARCDIQMTQSPSSLSASIGDTVTITCHASQSI------S--SWLAWYQQKPGKAP---K
LLIYK-------AS--SLQSGVPSRFSGRG--SGTDFTLT------IS-SLQPEDFATYY
CQKCNSNP--
>V40RF-JABR01076265.1-igkv |(8185, 8485)|2.99385601037|(1.000,1.000,0.994)|1
-TTGEIVMTQSPATLSLSPGERATLSCRASQSVS--------SYLAWYQQKPGQAP---R
LLIYG-------AS--SRATGIPARFSGSG--SGTDFTLT------IS-SLEPEDVAVYY
CQQGSNLP--
>V41RF-JABR01076266.1-igkv |(4594, 4894)|3.0|(1.000,1.000,1.000)|1
-ARCDIQMTQSPSSLSASVGDRVTITCQASQGI------S--NYLAWYQQKPGKAP---K
LLIYK-------AS--TLQSGVPSRFSGSG--SGTDFTLT------IS-SLQPEDFATYY
CQQGNSYP--
>V42RF-JABR01076266.1-igkv |(22548, 22848)|3.0|(1.000,1.000,1.000)|1
-ARCDIQMTQSPSSLSASVGDRVTITCQASQGI------S--SYLAWYQQKPGKAP---K
LLIYD-------AS--TLQSGVPSRFSGSG--SGTDFTLT------IS-SLQPEDFAAYY
CQQGNSNP--
>V43RF-JABR01080842.1-trav |(1737, 2024)|2.8526018934|(0.986,0.899,0.998)|1
-LSGEDQVTQSPEALRLREGESSSLNCSYTVSS------L--RGLLWYRQDPGKGP---E
FLFILY-S--AGE------EKEKERLKATLTKK--ESFLH------IT-GPKPEDSATYL
CAVQ------
>V44RF-JABR01088351.1-igkv |(10561, 10879)|3.0|(1.000,1.000,1.000)|1
-TSGDIVMTQTPLSLPVTPGEPASISCRSSQSLLDSDDGY--TYLDWYLQKPGQSP---Q
LLIYE-------VS--NRASGVSDRFSGSG--SGTDFTLK------IS-RVEAEDVGVYY
CMQSIEYP--
>V45RF-JABR01088351.1-igkv |(62711, 63011)|3.0|(1.000,1.000,1.000)|1
-ARCDIQMTQSPSSLSASVGDRVTITCRASQSI------N--KELSWYQQKPGKAP---T
LLIYA-------AS--SLQTGVSSRFSGSG--SGTDFTLT------IS-SLQPEDVATYY
CLQDYTTP--
>V46RF-JABR01088351.1-igkv |(74390, 74708)|2.85709598554|(0.965,0.930,0.967)|1
-SSGEIVMTRTPLSLPITPGEPASISCRSSQSLMDGDDGF--TYLYWYLQKPGQSP---Q
LLMHF-------AS--YRASGVPDRFSGSG--SGTDFTLE------IS-KVEAEDIGVYY
CMQALELP--
>V47RF-JABR01088351.1-igkv |(103867, 104182)|2.95682541375|(0.999,0.963,1.000)|1
-SSGDIVMTQTPLSLPVIPGEPASISCRSSQSLLHS-NGY--TYLDWYLQKPGQSP---Q
LLIYL-------GS--NRASGVPDRFSGSG--SGTDFTLK------IS-RVEAEDVGVYY
CMQALEFP--
>V48RF-JABR01088351.1-igkv |(113703, 114003)|2.99698000014|(1.000,0.999,0.998)|1
-ARCDIQMTQSPSSLSASVGDRVTITCRASQGI------S--NDLAWYQQKLGETP---K
LLIYD-------AS--SLQSGIPSRFSGSG--SGADFTLT------IS-SLQPEDFATYY
CQHYYSAP--
>V49RF-JABR01088351.1-igkv |(136166, 136466)|3.0|(1.000,1.000,1.000)|1
-ARCDIQMTQSPSSLSASVGDRVTISCQASQNI------Y--SNLGWYQQKPGKAP---K
LLIYA-------AS--TLQSGVPSRFSGSG--SGTDFTLT------IS-SLQPEDVATYY
CQHGYSTP--
>V50RF-JABR01088351.1-igkv |(159354, 159654)|2.99899600001|(1.000,0.999,1.000)|1
-ARCDIQMTQSPSSLSASVGDRITITCQASQGI------S--NDLAWYQQKPGESP---K
LLIYE-------AS--SLQSGIPSRFSGSG--SGTDFTLT------IS-SLQPEDFATYY
CQHYYSTP--
>V51RF-JABR01088351.1-igkv |(170244, 170542)|2.98972803289|(1.000,0.992,0.998)|1
-ARCDIQMTQSPSSLSASVGDRVTISCQASESI------S--DYLNWYQQKPGKAP---K
LLIYA-------AS--TLQSVVPSRFSGSG--SGTDFTLT------IS-SLQPEDFATYY
CQHGYGT---
>V52RF-JABR01089346.1-ighv |(860, 1169)|3.0|(1.000,1.000,1.000)|1
-AQSQVQLVQSG-AEVKKPGASVKVSCKASGYNF----RS--YAISWVRQAPGQGL---E
WMGVIIP--IRSRT--SYAQKFQGRVTITADTSTSTAYME------LS-SLRSEDMAVYY
CAR-------
>V53RF-JABR01090264.1-ighv |(61, 375)|2.33734699574|(0.918,0.680,0.945)|1
-VWSQVTLKESG-PALVKPTQTLTLTCTFSGFSI----STSGTGMGWIRQPSGKAL---E
WLASIYW---NYSK--YYSTSLKSRLTISKDTSKNQVVLT------MT-NMDPVDTATYY
CAHI------
>V54RF-JABR01091180.1-ighv |(15340, 15652)|2.92693691128|(0.997,0.942,1.000)|1
-VLSQVQLQESG-PAVVKPSETLSLTCAVSGGSI----SS-YYYWSWIRQPPGKGL---E
WIGYIYGS--GGST--YYNPSLKSRVTISTDTSKNQFSLK------LS-SVTAADTAVYY
CAR-------
>V55RF-JABR01091180.1-ighv |(60296, 60605)|2.99799600001|(0.999,1.000,0.999)|1
-VQCEVQLVESG-GGLVQPGGSLRLSCAASGFTF----SS--YWMSWVRQAPEKGL---E
WVSYINSD--GSST--SYADSMKGRFTISRDNAKNSLYLQ------MN-SLRAEDRAVYY
CVR-------
>V56RF-JABR01091180.1-ighv |(68033, 68348)|3.0|(1.000,1.000,1.000)|1
-VQCEVQLVESG-GGLVQPGGSLRISCAASGFTF----SS--SAMHWVRQASGKGL---E
WVGRIRSKSKNYAT--DYAASVKGRFTISRDDSKNTAYLQ------MN-SLKTEDTAVYY
CTT-------
>V57RF-JABR01091180.1-ighv |(78923, 79238)|3.0|(1.000,1.000,1.000)|1
-VQCEVQLVESG-GGLVQPEGSLRLSCAASGFTF----SS--YYMHWVRQAPGKGL---E
WVGLIKNKANSYTT--EYAASVKGRFTISRDDSKNTLYLQ------MS-SLKTEDTAVYY
CAR-------
>V58RF-JABR01092448.1-trbv |(783, 1083)|2.96989600501|(0.992,0.991,0.987)|1
--HTDAGVIQSPRHEVTEMGKEVTLRCEPISGH---------SSLFWYRQTMMRGL---E
FLIYFN-N--KSPI--DDSGMPKDRFSAKMPD-ASFSTLR------IQ-PSEPRDSAVYF
CASSL-----
>V59RF-JABR01092448.1-trbv |(15339, 15639)|2.97271202074|(0.991,0.985,0.997)|1
--LIDAGVTQTPRHKVTEIGQEVTMRCQPILGH---------NTVFWYRQTMMQGL---E
LLVYLR-N--KASL--DDSGMPKDRFSAEMPD-ASLATLK------IQ-PSEPRDSAVYL
CASGL-----
>V62RF-JABR01092448.1-trbv |(32724, 33024)|2.88625569424|(0.965,0.984,0.941)|1
--SPGEEVTQTPKHLVKGEGQKAKLYCAPITGH---------SYVFWYQQVLKKEF---K
FLISFQ-N--EDVV--DETQMPKERFSAKCPR-NSPCSLE------IQ-ATKLKDSATYF
CASSQ-----
>V63RF-JABR01092448.1-trbv |(49780, 50073)|2.79288979663|(0.953,0.928,0.919)|1
--LSNAGITQNPRHLVRRRGQEARLRCSPMKGH---------SHVYWYQQLPEEGL---K
FMVYLQ-K--EKII--DESGMPKERFSAEFPK-EGPSILR------IQ-QAEQEDSAAYF
CAS-------
>V64RF-JABR01092448.1-trbv |(70823, 71123)|2.89046151263|(0.995,0.923,0.993)|1
--STDTKVTQRPRLLVKANEQKAKMECVPIKGH---------SYVYWYRKKLDEEL---K
FLVYFQ-N--EVII--QKAEIINERFSAQCPQ-NSSCTLE------IQ-STESGDAALYF
CASSK-----
>V65RF-JABR01092448.1-trbv |(79737, 80037)|2.99593600205|(1.000,0.996,1.000)|1
--SFHAKVTQTPGYLVKGKGQKTKMDCTPEKGH---------TFVYWYQQNQNKEF---T
FLISFQ-S--EQVL--QETELHKKRFSSQCPK-NPPCSLE------IL-SSEPGDTALYL
CASSQ-----
>V66RF-JABR01092448.1-trbv |(88946, 89244)|2.92919856051|(0.994,0.989,0.953)|1
--SMDADVTQTPRNMIAKTGKRIMLECSQTKGH---------DQMYWYRQDPGLGL---R
LIYYSF-D--VKDI---NKGEISDGYSVSRQE-QAQFSLS------LE-SATPNQTALYF
CATSD-----
>V67RF-JABR01092448.1-trbv |(97426, 97723)|3.0|(1.000,1.000,1.000)|1
--LMEADIYQNPRHRVIGTGKKITLECSQTMGH---------DKMYWYQQDPGMEL---H
LIHYSY-G--VNST---ERGDFSSESTVSRIR-IEHFPLT------LE-SASPSHTSQYL
CASSE-----
>V68RF-JABR01092448.1-trbv |(131672, 131969)|2.86776289014|(0.976,0.980,0.923)|1
--PLEAQVTQNPRHLITVTGKKLTVTCSQNMNH---------EYMSWYRQDPGLGL---R
QIYYSI-N--VEVI---DKGDIPEGYNVSRKE-KTNFPLI------LE-SPSPSQTSLYL
CASSL-----
>V69RF-JABR01092448.1-trbv |(137251, 137558)|2.97948011776|(0.996,0.985,0.999)|1
--LVDVKVTQSSRHLIKRMGEKVFLECVQDMDH---------ERMFWYRQDPGLGL---Q
LIYFSY-D--VKVN---EKGDIPEGYSVSREK-KERFSLI------LG-SASTNQTSMYL
CASSLSTA--
>V70RF-JABR01094257.1-igkv |(834, 1136)|2.66830274972|(0.988,0.808,0.994)|1
-SSGDIAMTQTPLSLPVTPGELASISCRSSQSLLHS-DGK--TYLNWYLQKPGQSP---Q
LPIYT-------VS--NQASGVQERFSGSG--SGTDFTLK------IS-RVEAEDVGVYY
CMQD------
>V72RF-JABR01095741.1-trbv |(145128, 145441)|2.69360590994|(0.993,0.998,0.818)|1
--SLDTAVSQTPKYLVTQMGKKESLKCEQNLGH---------DTMYWYKQDSKKLL---Q
IMFSYN-N--KELI---INETVPNRISPDSPD-KAHLILH------IK-SLELGDSAVYF
CASSQGTALQ
>V73RF-JABR01095741.1-trbv |(149740, 150037)|2.97268883957|(0.998,0.980,0.996)|1
--PTDAGVTQTPKHLVMGMTNKKSLKCEQHMGH---------RAMYWYKQKAKKPP---E
IMFMYN-Y--EQL---SINESVPSRFSPECSK-SSLLNLH------LQ-ALQPEDSALYL
CASSQ-----
>V74RF-JABR01095742.1-trbv |(5770, 6070)|2.97696800026|(0.991,0.993,0.993)|1
--HTEPEVTQTPSHRVTQMGQEVILRCVPISNH---------LYFYWYRQILGQKV---E
FLVYFY-N--DEIS--EKSEIFDDRFSVGRPD-GSNFTLK------IK-STKLEDSAMYF
CASSE-----
>V75RF-JABR01095742.1-trbv |(13381, 13677)|2.3513778204|(0.925,0.994,0.674)|1
--SLDTAVSQTPKYLVTQMGKKESLKCEQNLGH---------DAMYWYKQDSKKLL---K
IMFSYN-N--KELI---LNETVPNRISPDSPD-KAHLILH------IK-SLELGDSAVYF
CASTK-----
>V78RF-JABR01189674.1-iglv |(736, 1045)|3.0|(1.000,1.000,1.000)|1
[truncated: 46,267 more chars]
