# Supplementary material for: Iterative Variable Gene Discovery from Whole Genome Sequencing with a Bootstrapped Multiresolution Algorithm
Source: Comput Math Methods Med. 2019 Feb 11;2019:3780245. doi: 10.1155/2019/3780245 (PMC6388353; doi:10.1155/2019/3780245)
Supplement: Supplementary Materials — supp_materialsV2.pdf: this is an updated document, which includes new figures requested by the reviewer. sequences_alignments.zip: these are genome sequence files that are relevant for reproducing some of the results. [file 3780245.f1.zip › 3780245.f1/sequences_alignments/bstrp_iteration_3_r.nwk]

((V170RF-AACZ03015561.1-igkv:0.01138,(V154RF-CABD02196513.1-igkv:0.03394,V147RF-AACZ03151979.1-igkv:0.03116)0.866:0.02913)0.924:0.04532,((V39RF-ADFV01106195.1-igkv:0.04515,((((((V218RF-AQIA01017123.1-igkv:0.03358,(V44RF-AQIB01144273.1-igkv:0.04449,V208RF-JYKQ01076937.1-igkv:0.03335)0.342:0.01150)0.542:0.00055,(((V37RF-AGCE01134600.1-igkv:0.10574,V100RF-ADFV01106214.1-igkv:0.02382)0.766:0.01594,V59RF-ADFV01138112.1-igkv:0.03783)0.906:0.04059,((V192RF-JYKQ01052444.1-igkv:0.03430,(V184RF-JYKQ01052441.1-igkv:0.02241,(V48RF-JABR01088351.1-igkv:0.04488,((V52RF-AQIA01017105.1-igkv:0.0,V123RF-AQIA01058133.1-igkv:0.0):0.02215,(V96RF-AHZZ01042083.1-igkv:0.08324,(V101RF-AHZZ01042085.1-igkv:0.00055,(V16RF-AQIB01144243.1-igkv:0.00055,V50RF-JABR01088351.1-igkv:0.03301)0.821:0.01098)0.000:0.00054)0.835:0.01098)0.869:0.00053)0.900:0.02296)0.880:0.02312)0.751:0.01123,((V114RF-AHZZ01042093.1-igkv:0.01803,(V0RF-CABD02043817.1-igkv:0.01045,((V201RF-AACZ03179013.1-igkv:0.00055,(((V55RF-AACZ03070936.1-igkv:0.00054,(V172RF-CABD02379503.1-igkv:0.01042,(V171RF-CABD02379427.1-igkv:0.00055,V164RF-CABD02196901.1-igkv:0.01048)0.000:0.00055)0.850:0.01043)0.460:0.01039,(V177RF-AACZ03016034.1-igkv:0.01036,V190RF-AACZ03151911.1-igkv:0.02094)0.801:0.01034)0.136:0.00054,(V115RF-AACZ03126842.1-igkv:0.01047,(V206RF-AACZ03179806.1-igkv:0.01055,(V189RF-AACZ03151873.1-igkv:0.00055,V207RF-AACZ03183442.1-igkv:0.01055)0.928:0.03163)0.923:0.00053)0.769:0.00055)0.000:0.00055)0.960:0.00054,V200RF-AACZ03178854.1-igkv:0.02074)0.790:0.01019)0.943:0.03996)0.787:0.01826,((V196RF-AQIA01007908.1-igkv:0.01124,(V186RF-JYKQ01052443.1-igkv:0.02252,V13RF-AQIB01144242.1-igkv:0.02228)0.189:0.01104)0.929:0.04677,((V136RF-ADFV01132961.1-igkv:0.06370,((V162RF-CABD02196556.1-igkv:0.02261,(V10RF-AJFE01012232.1-igkv:0.01125,V130RF-AACZ03151853.1-igkv:0.02286)0.738:0.00239)0.799:0.01121,(V51RF-JABR01088351.1-igkv:0.04728,V54RF-AQIA01017115.1-igkv:0.09406)0.744:0.01084)0.750:0.01130)0.771:0.01848,((V177RF-JYKQ01052440.1-igkv:0.00055,((V37RF-CABD02196554.1-igkv:0.01059,V161RF-CABD02196553.1-igkv:0.00055)0.748:0.01231,(V11RF-AJFE01012232.1-igkv:0.02188,V131RF-AACZ03151853.1-igkv:0.01085)0.896:0.03412)0.985:0.08362)0.749:0.01100,(V53RF-AQIA01017109.1-igkv:0.00053,V98RF-AHZZ01042084.1-igkv:0.02220)0.552:0.02317)0.878:0.03626)0.901:0.04904)0.743:0.01372)0.886:0.02348)0.765:0.01118)0.755:0.01111)0.792:0.01132,(V175RF-AACZ03015564.1-igkv:0.04463,(((V50RF-AQIA01017099.1-igkv:0.05661,V116RF-AHZZ01042093.1-igkv:0.04731)0.854:0.04190,(V49RF-JABR01088351.1-igkv:0.04409,(V17RF-AQIB01144243.1-igkv:0.02130,V93RF-AHZZ01042080.1-igkv:0.02391)0.721:0.02539)0.297:0.01541)0.935:0.06098,(V35RF-AQIB01144265.1-igkv:0.02206,(V28RF-JABR01076261.1-igkv:0.04156,(V46RF-AHZZ01104243.1-igkv:0.00054,(V210RF-AQIA01017120.1-igkv:0.01117,V152RF-JYKQ01005027.1-igkv:0.02263)0.792:0.01093)0.858:0.02129)0.806:0.02565)0.851:0.02279)0.858:0.02146)0.864:0.02234)0.732:0.01152,((((((V35RF-ADFV01106193.1-igkv:0.02033,((V43RF-AHZZ01104241.1-igkv:0.00055,(V208RF-AQIA01017118.1-igkv:0.01092,V27RF-JABR01076261.1-igkv:0.05674)0.000:0.00053)0.000:0.00054,V32RF-AQIB01144264.1-igkv:0.03361)0.960:0.05880)0.998:0.14052,(V76RF-ABGA01198108.1-igkv:0.07872,V178RF-AACZ03016143.1-igkv:0.14499)0.965:0.08012)0.652:0.00246,V33RF-AGCE01134599.1-igkv:0.04600)0.774:0.01144,(((V130RF-ADFV01132961.1-igkv:0.04248,(V190RF-ABGA01257772.1-igkv:0.01080,((V8RF-AJFE01011588.1-igkv:0.01116,V176RF-AACZ03015754.1-igkv:0.01124)0.891:0.02262,V46RF-CABD02199693.1-igkv:0.01080)0.791:0.01096)0.792:0.01254)0.689:0.01818,(V3RF-AQIB01144236.1-igkv:0.01098,(V39RF-AQIA01017096.1-igkv:0.03281,((V104RF-AHZZ01042093.1-igkv:0.01076,V194RF-JYKQ01052450.1-igkv:0.00055)0.750:0.02196,V45RF-JABR01088351.1-igkv:0.00054)0.819:0.01075)0.776:0.01092)0.763:0.01632)0.537:0.02030,((V47RF-AQIA01017097.1-igkv:0.02211,(V112RF-AHZZ01042093.1-igkv:0.03341,(V9RF-AQIB01144237.1-igkv:0.05689,V190RF-JYKQ01052444.1-igkv:0.01089)0.276:0.01119)0.928:0.00055)0.845:0.04252,V132RF-ADFV01132961.1-igkv:0.14515)0.838:0.02872)0.864:0.03040)0.866:0.02284,V32RF-AGCE01134598.1-igkv:0.15709)0.812:0.02156,(V4RF-JZKE01218258.1-igkv:0.16479,(V155RF-CABD02196515.1-igkv:0.02285,(V174RF-AACZ03015562.1-igkv:0.01136,V79RF-AJFE01002289.1-igkv:0.00055)0.865:0.00055)0.315:0.03047)0.374:0.02761)0.766:0.01489)0.789:0.01142,((((((((V112RF-ABGA01356724.1-igkv:0.01313,((V23RF-AJFE01012245.1-igkv:0.0,V143RF-AACZ03151857.1-igkv:0.0):0.04169,V42RF-CABD02196586.1-igkv:0.01537)0.775:0.03275)0.844:0.02041,(V214RF-AQIA01017120.1-igkv:0.01120,V39RF-AQIB01144265.1-igkv:0.03364)0.919:0.03389)0.773:0.01070,((((V37RF-AQIB01144265.1-igkv:0.02627,((V157RF-CABD02196521.1-igkv:0.04231,(V21RF-AJFE01012238.1-igkv:0.01098,V140RF-AACZ03151855.1-igkv:0.00055)0.786:0.01386)0.405:0.01128,V114RF-ABGA01356729.1-igkv:0.03647)0.813:0.01704)0.716:0.01181,V42RF-AQIB01144273.1-igkv:0.08537)0.699:0.01011,V223RF-AQIA01017128.1-igkv:0.03564)0.748:0.00947,((V233RF-AHZZ01106331.1-igkv:0.03460,V150RF-JYKQ01005022.1-igkv:0.01094)0.542:0.01103,((V212RF-AQIA01017120.1-igkv:0.00465,V143RF-JYKQ01005012.1-igkv:0.02306)0.642:0.00350,(V66RF-AHZZ01117753.1-igkv:0.03363,V148RF-JYKQ01005018.1-igkv:0.01150)0.878:0.02646)0.760:0.01031)0.665:0.01111)0.788:0.01090)0.903:0.00055,V37RF-ADFV01106193.1-igkv:0.04506)0.840:0.01316,(((V30RF-JABR01076261.1-igkv:0.01307,V33RF-JABR01076263.1-igkv:0.04509)0.877:0.03348,(V47RF-AQIB01144274.1-igkv:0.05176,V34RF-JABR01076263.1-igkv:0.05962)0.641:0.01141)0.427:0.02216,(V209RF-JYKQ01076937.1-igkv:0.02003,(V257RF-AHZZ01189923.1-igkv:0.04511,V221RF-AQIA01017126.1-igkv:0.05899)0.762:0.01138)0.766:0.01494)0.789:0.01875)0.363:0.01319,(((V80RF-AJFE01002352.1-igkv:0.0,V45RF-CABD02196595.1-igkv:0.0):0.04559,V165RF-CABD02196902.1-igkv:0.19098)0.905:0.03858,(V43RF-CABD02196587.1-igkv:0.05602,V146RF-AACZ03151858.1-igkv:0.02406)0.000:0.00055)0.863:0.02063)0.775:0.01178,(((V48RF-AGCE01134612.1-igkv:0.01154,V49RF-AGCE01134613.1-igkv:0.01094)0.991:0.05696,((V119RF-AJFE01047586.1-igkv:0.0,V172RF-AACZ03015562.1-igkv:0.0):0.04515,V131RF-ABGA01394068.1-igkv:0.01929)0.617:0.00370)0.784:0.01123,((((V106RF-ABDC01599688.1-igkv:0.04677,((V29RF-ABDC01351837.1-igkv:0.04346,(V26RF-ABDC01351831.1-igkv:0.01091,V134RF-ABDC01537099.1-igkv:0.00055)0.910:0.00055)0.999:0.15220,(V56RF-ABDC01394567.1-igkv:0.07093,V35RF-ABDC01360510.1-igkv:0.13628)0.595:0.04252)0.000:0.00055)0.979:0.12672,((V105RF-AGCE01134619.1-igkv:0.41001,(((((V165RF-JYKQ01026655.1-trav:0.03418,((((V204RF-AQIB01128641.1-trav:0.01067,V201RF-JYKQ01062939.1-trav:0.03253)0.785:0.01073,((V204RF-AHZZ01093949.1-trav:0.0,V202RF-JYKQ01066660.1-trav:0.0):0.01073,V178RF-JABR01098595.1-trav:0.02163)0.000:0.00055)0.000:0.00054,(((V84RF-AACZ03097624.1-trav:0.00055,V205RF-AACZ03179105.1-trav:0.01063)0.000:0.00054,(V23RF-CABD02105615.1-trav:0.00055,V85RF-ADFV01192042.1-trav:0.01084)0.922:0.02147)0.785:0.01053,V82RF-AGCE01026522.1-trav:0.05535)0.765:0.01084)0.829:0.01071,V146RF-AQIA01064159.1-trav:0.00055)0.632:0.02176)0.996:1.27054,(((V96RF-ADFV01046573.1-trgv:0.14709,((((V0RF-AQIB01018214.1-trgv:0.00054,(V68RF-AQIA01046502.1-trgv:0.03215,(V0RF-JYKQ01003191.1-trgv:0.01041,V2RF-AQIB01018217.1-trgv:0.04200)0.860:0.02042)0.311:0.01046)0.833:0.03079,V0RF-AHZZ01030316.1-trgv:0.01046)0.849:0.01075,V66RF-AQIA01046502.1-trgv:0.00054)0.891:0.05429,(V89RF-ABGA01290201.1-trgv:0.01454,(V28RF-AJFE01038665.1-trgv:0.01039,V169RF-CABD02337341.1-trgv:0.05584)0.960:0.05665)0.838:0.02480)0.803:0.05497)0.977:0.12327,(V95RF-ADFV01046571.1-trgv:0.06729,(V90RF-ABGA01290201.1-trgv:0.06763,((V29RF-AJFE01038666.1-trgv:0.00055,V2RF-AACZ03050973.1-trgv:0.02116)0.967:0.05549,(V167RF-CABD02337338.1-trgv:0.02159,(V27RF-AJFE01038664.1-trgv:0.01070,(V91RF-ABGA01290202.1-trgv:0.00055,V149RF-ABGA01132346.1-trgv:0.01081)0.884:0.02195)0.572:0.01084)0.858:0.02193)0.894:0.02223)0.022:0.00054)0.920:0.05811)0.843:0.03563,(V9RF-JABR01052882.1-trgv:0.01067,(V1RF-AQIB01018215.1-trgv:0.02112,(V67RF-AQIA01046502.1-trgv:0.0,V1RF-JYKQ01003191.1-trgv:0.0):0.03255)0.757:0.01070)0.174:0.00053)1.000:1.75878)0.000:0.30343,((((V51RF-ABDC01388284.1-trav:0.12064,(((V49RF-ABDC01379531.1-trav:0.0,V90RF-ABDC01491653.1-trav:0.0):0.09912,(V50RF-JZKE01143895.1-trav:0.05989,(V54RF-JZKE01143896.1-trav:0.02153,V55RF-JZKE01143902.1-trav:0.01185)0.704:0.00054)0.901:0.02244)0.773:0.01391,(((V71RF-ADFV01192038.1-trav:0.02704,(V90RF-AGCE01026530.1-trav:0.06235,(V188RF-JABR01098600.1-trav:0.05929,(V64RF-JYKQ01054942.1-trav:0.01168,(V133RF-AQIA01064146.1-trav:0.02333,V53RF-AHZZ01107544.1-trav:0.01159)0.780:0.01170)0.656:0.00055)0.625:0.02110)0.971:0.07250)0.041:0.01282,(V10RF-CABD02105588.1-trav:0.00054,(V62RF-AJFE01069975.1-trav:0.00055,V72RF-AACZ03097614.1-trav:0.02278)0.846:0.01136)0.757:0.00824)0.975:0.09054,((V92RF-AGCE01026531.1-trav:0.02860,((V144RF-ABGA01083939.1-trav:0.01175,(V67RF-ADFV01192037.1-trav:0.02401,((V59RF-AJFE01069975.1-trav:0.0,V69RF-AACZ03097613.1-trav:0.0):0.01189,V7RF-CABD02105584.1-trav:0.00055)0.000:0.00055)0.809:0.01190)0.793:0.01247,((V130RF-AQIA01064144.1-trav:0.0,V195RF-JABR01098603.1-trav:0.0):0.00054,(V80RF-AHZZ01198216.1-trav:0.00055,V61RF-JYKQ01054940.1-trav:0.01030)0.912:0.01005)0.857:0.02155)0.467:0.03552)0.997:0.15875,(V87RF-AGCE01026529.1-trav:0.08205,((V76RF-ADFV01192039.1-trav:0.03524,(V14RF-CABD02105592.1-trav:0.01156,(V76RF-AACZ03097619.1-trav:0.01161,V67RF-AJFE01069976.1-trav:0.02333)0.000:0.00053)0.786:0.01163)0.770:0.01169,(V125RF-ABGA01387833.1-trav:0.06004,((V215RF-AQIB01128644.1-trav:0.01160,((V139RF-AQIA01064146.1-trav:0.0,V221RF-AQIB01128644.1-trav:0.0):0.00055,V69RF-JYKQ01054942.1-trav:0.01149)0.000:0.00055)0.511:0.00053,(V30RF-AHZZ01098200.1-trav:0.02322,V187RF-JABR01098599.1-trav:0.02330)0.786:0.01166)0.927:0.03525)0.787:0.01133)0.882:0.04027)0.970:0.09081)0.726:0.02528)0.981:0.10655)0.810:0.05033)0.997:0.40590,(((V61RF-JZKE01143915.1-trav:0.13584,(V89RF-AGCE01026530.1-trav:0.13565,((V52RF-AHZZ01107544.1-trav:0.01115,(V132RF-AQIA01064146.1-trav:0.01132,(V63RF-JYKQ01054942.1-trav:0.01129,V194RF-JABR01098601.1-trav:0.02275)0.779:0.01136)0.999:0.00054)0.876:0.02044,(V140RF-ABGA01083937.1-trav:0.01303,(V61RF-AJFE01069975.1-trav:0.00055,V71RF-AACZ03097614.1-trav:0.01143)0.988:0.07001)0.469:0.01872)0.862:0.03247)0.963:0.08530)0.802:0.03445,(((V191RF-JABR01098600.1-trav:0.01124,(V136RF-AQIA01064146.1-trav:0.02240,((V218RF-AQIB01128644.1-trav:0.0,V55RF-AHZZ01107544.1-trav:0.0):0.00055,V66RF-JYKQ01054942.1-trav:0.01118)0.000:0.00055)0.885:0.02284)0.923:0.04294,(V73RF-ADFV01192038.1-trav:0.02246,(V138RF-ABGA01083932.1-trav:0.04517,(V64RF-AJFE01069976.1-trav:0.00055,V11RF-CABD02105589.1-trav:0.01112)0.946:0.02232)0.838:0.00055)0.812:0.02756)0.996:0.14317,(V71RF-ABDC01418428.1-trav:0.16035,((V48RF-JZKE01143895.1-trav:0.00055,V58RF-JZKE01143910.1-trav:0.03456)0.768:0.03552,(V77RF-ABDC01440241.1-trav:0.09802,V52RF-JZKE01143896.1-trav:0.16116)0.499:0.03896)0.354:0.02621)0.736:0.02150)0.888:0.03685)0.942:0.14161,((V65RF-JZKE01143916.1-trav:0.02543,V45RF-ABDC01377653.1-trav:0.12980)0.794:0.10871,(V94RF-AGCE01026534.1-trav:0.18749,(V3RF-CABD02105570.1-trav:0.02309,((V53RF-AJFE01069975.1-trav:0.01156,V64RF-AACZ03097612.1-trav:0.00054)0.000:0.00055,(V147RF-ABGA01113130.1-trav:0.03592,(V62RF-ADFV01192035.1-trav:0.02336,((V211RF-AQIB01128644.1-trav:0.02341,V197RF-JABR01098604.1-trav:0.00054)0.825:0.00054,(V126RF-AQIA01064137.1-trav:0.01179,(V77RF-AHZZ01198213.1-trav:0.00055,V58RF-JYKQ01054933.1-trav:0.01155)0.943:0.03505)0.403:0.01177)0.928:0.03583)0.000:0.00055)0.176:0.01153)0.897:0.02310)0.766:0.01507)0.968:0.14631)0.869:0.13296)0.981:0.30160)0.599:0.11137,(((V3RF-AHZZ01035404.1-trav:0.00055,((V154RF-AQIA01064166.1-trav:0.0,V121RF-JYKQ01135389.1-trav:0.0):0.00055,(V94RF-JABR01039937.1-trav:0.04948,((V93RF-ADFV01192050.1-trav:0.03754,(V220RF-ABGA01321068.1-trav:0.00054,((V113RF-AJFE01024276.1-trav:0.01220,V60RF-AACZ03095319.1-trav:0.00055)0.918:0.02467,V28RF-CABD02105628.1-trav:0.02454)0.466:0.00054)0.612:0.00055)0.959:0.03726,V198RF-AQIB01128636.1-trav:0.02477)0.000:0.00054)0.849:0.01224)0.821:0.01193)1.000:0.58925,((((V82RF-AACZ03097622.1-trav:0.00054,(V83RF-AJFE01010527.1-trav:0.01178,V21RF-CABD02105612.1-trav:0.01168)0.842:0.01172)0.998:0.50908,(((V202RF-AHZZ01093946.1-trav:0.01223,(V151RF-AQIA01064166.1-trav:0.00055,V162RF-JYKQ01026643.1-trav:0.02282)0.844:0.02225)0.971:0.06449,(((V111RF-AJFE01024276.1-trav:0.0,V57RF-AACZ03095314.1-trav:0.0):0.00055,V193RF-AACZ03171149.1-trav:0.03508)0.809:0.01215,(V223RF-ABGA01321081.1-trav:0.04602,(V90RF-ADFV01192045.1-trav:0.03458,V176RF-JABR01098593.1-trav:0.05988)0.780:0.01149)0.749:0.01033)0.652:0.00576)0.796:0.07008,(V34RF-JZKE01143869.1-trav:0.01023,V101RF-ABDC01542818.1-trav:0.10692)0.909:0.11151)0.996:0.44319)0.625:0.09558,(V80RF-AGCE01026522.1-trav:0.03542,(V80RF-ADFV01192040.1-trav:0.03792,(V182RF-JABR01098597.1-trav:0.02515,(V43RF-JABR01080842.1-trav:0.02494,(V73RF-JYKQ01054957.1-trav:0.02071,(((V70RF-AJFE01069977.1-trav:0.0,V17RF-CABD02105602.1-trav:0.0):0.00054,V79RF-AACZ03097619.1-trav:0.01259)0.782:0.02061,((V143RF-AQIA01064151.1-trav:0.0,V206RF-AQIB01128642.1-trav:0.0):0.00055,V34RF-AHZZ01098200.1-trav:0.01254)0.761:0.01811)0.184:0.02535)0.854:0.01739)0.951:0.00055)0.757:0.01262)0.868:0.04313)0.995:0.30322)0.673:0.06455,(V199RF-JABR01098604.1-trav:0.02102,(V64RF-ADFV01192035.1-trav:0.03523,(V55RF-AJFE01069975.1-trav:0.01156,V66RF-AACZ03097613.1-trav:0.00055)0.747:0.01151)0.849:0.05130)1.000:0.50943)0.634:0.10435)0.598:0.04733,(((V57RF-JZKE01143910.1-trav:0.08220,(V143RF-ABGA01083939.1-trav:0.01089,(((V6RF-CABD02105581.1-trav:0.01089,(((V66RF-ADFV01192037.1-trav:0.04182,V201RF-JABR01098604.1-trav:0.02146)0.876:0.00054,((V129RF-AQIA01064138.1-trav:0.0,V79RF-AHZZ01198214.1-trav:0.0):0.00055,V214RF-AQIB01128644.1-trav:0.03272)0.850:0.01359)0.422:0.01153,V60RF-JYKQ01054940.1-trav:0.01370)0.876:0.03037)0.712:0.00054,V68RF-AACZ03097613.1-trav:0.00055)0.645:0.00055,V58RF-AJFE01069975.1-trav:0.01089)0.000:0.00053)0.942:0.09486)0.999:0.40277,((((V18RF-CABD02105602.1-trav:0.00055,(V71RF-AJFE01069977.1-trav:0.00055,((V80RF-AACZ03097619.1-trav:0.00055,(V228RF-ABGA01358461.1-trav:0.05368,V81RF-ADFV01192040.1-trav:0.01016)1.000:0.00055)0.000:0.00054,(V144RF-AQIA01064151.1-trav:0.00052,V207RF-AQIB01128642.1-trav:0.02095)0.915:0.02099)0.849:0.01052)0.745:0.02098)0.727:0.01541,V81RF-AGCE01026522.1-trav:0.05371)0.180:0.01572,V183RF-JABR01098597.1-trav:0.02619)1.000:0.51679,(((V47RF-JZKE01143893.1-trav:0.01126,V99RF-ABDC01533414.1-trav:0.09062)0.668:0.10346,(V84RF-AGCE01026527.1-trav:0.16151,((V184RF-JABR01098598.1-trav:0.03233,(V140RF-AQIA01064148.1-trav:0.01058,(V222RF-AQIB01128644.1-trav:0.02130,(V31RF-AHZZ01098200.1-trav:0.01069,V70RF-JYKQ01054953.1-trav:0.00055)0.000:0.00054)0.841:0.01061)0.958:0.00055)0.893:0.02226,(((V68RF-AJFE01069976.1-trav:0.0,V77RF-AACZ03097619.1-trav:0.0):0.01075,(V118RF-ABGA01386446.1-trav:0.0,V15RF-CABD02105596.1-trav:0.0):0.00054)0.807:0.00888,V77RF-ADFV01192039.1-trav:0.07843)0.727:0.01216)0.830:0.04335)0.768:0.06489)0.989:0.19641,(((V54RF-AJFE01069975.1-trav:0.0,V65RF-AACZ03097613.1-trav:0.0,V160RF-AACZ03171395.1-trav:0.0):0.02387,(V4RF-CABD02105575.1-trav:0.01184,(V146RF-ABGA01113129.1-trav:0.03625,V63RF-ADFV01192035.1-trav:0.01216)0.053:0.00054)0.899:0.00054)0.976:0.14757,(V66RF-JZKE01143916.1-trav:0.02544,V46RF-ABDC01377655.1-trav:0.10016)0.958:0.11124)0.996:0.29644)0.848:0.11714)0.488:0.11913)0.741:0.08227,(((V145RF-AQIA01064159.1-trav:0.02010,(V203RF-AHZZ01093949.1-trav:0.01028,(V147RF-AQIA01064165.1-trav:0.01040,((V136RF-ABGA01061552.1-trav:0.03111,V84RF-ADFV01192042.1-trav:0.00054)0.544:0.01028,(V204RF-AACZ03179105.1-trav:0.02113,(V22RF-CABD02105614.1-trav:0.01032,(V83RF-AACZ03097624.1-trav:0.0,V195RF-AACZ03171676.1-trav:0.0):0.00055)0.000:0.00055)0.770:0.01014)0.785:0.01060)0.790:0.01032)0.853:0.00450)0.935:0.00645,V177RF-JABR01098595.1-trav:0.00055)0.997:0.55968,((V149RF-AQIA01064166.1-trav:0.02282,(V206RF-AHZZ01093949.1-trav:0.02261,V180RF-JABR01098595.1-trav:0.03419)0.804:0.01126)0.715:0.00237,(V56RF-AACZ03095312.1-trav:0.01157,(V24RF-CABD02105616.1-trav:0.01287,V191RF-AACZ03171059.1-trav:0.02374)0.772:0.01255)0.901:0.06892)0.996:0.56397)0.986:0.40808)0.760:0.05412)0.873:0.20962)0.931:0.33798,(((((V20RF-CABD02105611.1-trdv:0.04196,(V81RF-AACZ03097622.1-trdv:0.03213,((V0RF-AJFE01000016.1-trdv:0.0,V72RF-AJFE01069977.1-trdv:0.0,V82RF-AJFE01010527.1-trdv:0.0):0.03392,V202RF-AACZ03179105.1-trdv:0.00055)0.684:0.00307)0.754:0.01617)0.926:0.05812,(V43RF-JZKE01143874.1-trdv:0.10866,(V92RF-ABDC01497734.1-trdv:0.27020,V41RF-JZKE01143873.1-trdv:0.14690)0.702:0.02341)0.995:0.16121)0.869:0.03793,(V166RF-JYKQ01026663.1-trav:0.05342,(V202RF-AQIB01128641.1-trav:0.03349,(V208RF-AHZZ01093953.1-trav:0.01086,(V167RF-JYKQ01026665.1-trav:0.0,V204RF-JYKQ01066669.1-trav:0.0):0.00054)0.936:0.03466)0.693:0.01395)0.752:0.01338)0.964:0.23108,((V46RF-JZKE01143891.1-trav:0.08525,(V86RF-AGCE01026527.1-trdv:0.09044,(((V69RF-AJFE01069976.1-trdv:0.0,V78RF-AACZ03097619.1-trdv:0.0):0.01058,V16RF-CABD02105598.1-trdv:0.03236)0.923:0.03704,(V120RF-ABGA01386446.1-trdv:0.06448,(V79RF-ADFV01192039.1-trdv:0.04251,(V209RF-AQIB01128643.1-trav:0.01031,(V186RF-JABR01098598.1-trav:0.03141,(V33RF-AHZZ01098200.1-trav:0.05344,(V142RF-AQIA01064149.1-trav:0.01048,V72RF-JYKQ01054957.1-trav:0.01056)0.679:0.00674)0.780:0.01498)0.775:0.01048)0.803:0.01064)0.771:0.01017)0.704:0.00621)0.781:0.03350)0.915:0.09714)0.981:0.19272,((V62RF-JZKE01143915.1-trdv:0.11646,((V59RF-JZKE01143910.1-trav:0.05046,(V53RF-JZKE01143896.1-trav:0.05574,(V49RF-JZKE01143895.1-trav:0.04148,V48RF-ABDC01379531.1-trav:0.05548)0.712:0.00053)0.854:0.04021)0.776:0.03284,(V219RF-AQIB01128644.1-trav:0.00053,(V192RF-JABR01098600.1-trav:0.04902,((V67RF-JYKQ01054942.1-trav:0.00054,(V137RF-AQIA01064146.1-trav:0.00055,V56RF-AHZZ01107545.1-trav:0.01109)0.931:0.02235)0.913:0.02252,(V74RF-ADFV01192039.1-trav:0.04131,(V123RF-ABGA01387831.1-trav:0.03366,(V74RF-AACZ03097618.1-trav:0.01097,((V65RF-AJFE01069976.1-trav:0.0,V194RF-AACZ03171512.1-trav:0.0):0.02270,V12RF-CABD02105589.1-trav:0.02247)0.996:0.00054)0.728:0.02250)0.673:0.00525)0.951:0.05356)0.242:0.00055)0.292:0.01897)0.992:0.13896)0.699:0.02482)0.955:0.10896,(V33RF-JZKE01143868.1-trav:0.03600,((((V152RF-AQIA01064166.1-trdv:0.02142,(V91RF-ADFV01192049.1-trdv:0.04353,(V222RF-ABGA01321072.1-trdv:0.02137,(V58RF-AACZ03095317.1-trdv:0.00055,V26RF-CABD02105626.1-trdv:0.01072)0.000:0.00054)0.776:0.01061)0.778:0.01069)0.000:0.00054,(((V120RF-JYKQ01135388.1-trav:0.00053,(V153RF-AQIA01064166.1-trav:0.00054,V2RF-AHZZ01035404.1-trav:0.01058)0.568:0.02105)0.773:0.01047,V201RF-AQIB01128637.1-trav:0.04499)0.399:0.02135,((V1RF-AHZZ01035404.1-trdv:0.01072,V119RF-JYKQ01135385.1-trdv:0.01079)0.000:0.00054,V200RF-AQIB01128637.1-trdv:0.03256)0.860:0.01061)0.548:0.00053)0.888:0.02079,V174RF-JABR01098592.1-trdv:0.01064)0.490:0.00054,((V78RF-AGCE01026520.1-trdv:0.07800,(V92RF-ADFV01192049.1-trav:0.01095,(V173RF-JABR01098590.1-trav:0.02198,(V59RF-AACZ03095317.1-trav:0.01052,(V112RF-AJFE01024276.1-trav:0.00055,(V221RF-ABGA01321070.1-trav:0.0,V27RF-CABD02105626.1-trav:0.0):0.00055)0.000:0.00055)0.785:0.01061)0.759:0.01057)0.735:0.01090)0.853:0.02086,V77RF-AGCE01026520.1-trdv:0.03295)0.942:0.03201)0.655:0.04207)0.998:0.22694)0.000:0.05796)0.901:0.15223)0.915:0.27932,((V150RF-ADFV01192057.1-trdv:0.01961,((V26RF-AJFE01024273.1-trdv:0.0,V180RF-AACZ03095321.1-trdv:0.0):0.01156,V113RF-CABD02105639.1-trdv:0.01164)0.683:0.02711)0.998:1.06201,(V74RF-AGCE01026519.1-trav:0.76986,((((V61RF-ADFV01192035.1-trav:0.02435,(V125RF-AQIA01064137.1-trav:0.01230,(V57RF-JYKQ01054925.1-trav:0.00055,V118RF-AHZZ01044061.1-trav:0.01220)0.000:0.00055)0.767:0.01218)0.398:0.01250,(V148RF-ABGA01113133.1-trav:0.03736,((V52RF-AJFE01069974.1-trav:0.0,V63RF-AACZ03097611.1-trav:0.0):0.02255,V2RF-CABD02105568.1-trav:0.02126)0.689:0.00479)0.938:0.00054)0.988:0.22374,(V52RF-ABDC01388284.1-trav:0.16703,((V88RF-AGCE01026530.1-trav:0.00376,(V69RF-ADFV01192037.1-trav:0.02398,((V60RF-AJFE01069975.1-trav:0.0,V70RF-AACZ03097613.1-trav:0.0):0.01211,(V135RF-AQIA01064146.1-trav:0.01216,(V217RF-AQIB01128644.1-trav:0.0,V190RF-JABR01098600.1-trav:0.0):0.00055)0.900:0.02447)0.778:0.01202)0.843:0.03409)1.000:0.30755,(((V8RF-CABD02105586.1-trav:0.05956,(V145RF-ABGA01083939.1-trav:0.07461,V68RF-ADFV01192037.1-trav:0.00053)0.169:0.01152)0.923:0.03642,(V72RF-ADFV01192038.1-trav:0.03612,(V139RF-ABGA01083934.1-trav:0.02368,(V63RF-AJFE01069975.1-trav:0.0,V73RF-AACZ03097614.1-trav:0.0):0.06113)0.000:0.00055)0.317:0.01188)0.000:0.00054,(V62RF-JYKQ01054940.1-trav:0.02407,(V196RF-JABR01098603.1-trav:0.03608,(V81RF-AHZZ01198216.1-trav:0.00054,(V131RF-AQIA01064144.1-trav:0.00055,(V65RF-JYKQ01054942.1-trav:0.02338,((V134RF-AQIA01064146.1-trav:0.00054,(V189RF-JABR01098600.1-trav:0.02319,V216RF-AQIB01128644.1-trav:0.02335)0.796:0.01146)0.923:0.02354,V54RF-AHZZ01107544.1-trav:0.00055)0.801:0.01165)0.790:0.01226)0.903:0.01177)0.783:0.01157)0.786:0.01191)0.867:0.02372)0.954:0.10307)0.761:0.03520)0.947:0.16234)0.950:0.26432,((((V60RF-JZKE01143913.1-trav:0.11821,V127RF-ABDC01454736.1-trav:0.08456)0.478:0.01229,(V56RF-JZKE01143903.1-trav:0.01061,(V75RF-ADFV01192039.1-trav:0.02349,(((V57RF-AHZZ01107545.1-trav:0.0,V68RF-JYKQ01054942.1-trav:0.0):0.00055,(V138RF-AQIA01064146.1-trav:0.00486,V220RF-AQIB01128644.1-trav:0.00952)0.934:0.00933)0.982:0.06250,(V124RF-ABGA01387833.1-trav:0.02428,((V66RF-AJFE01069976.1-trav:0.0,V75RF-AACZ03097618.1-trav:0.0):0.01157,V13RF-CABD02105590.1-trav:0.00054)0.394:0.02380)0.711:0.02414)0.771:0.00054)0.986:0.10124)0.872:0.04018)0.754:0.03056,(V67RF-JZKE01143916.1-trav:0.14268,(V95RF-AGCE01026534.1-trav:0.15163,(((V57RF-AJFE01069975.1-trav:0.01147,V67RF-AACZ03097613.1-trav:0.00055)0.934:0.02321,(V142RF-ABGA01083939.1-trav:0.00055,(V5RF-CABD02105579.1-trav:0.00055,V65RF-ADFV01192035.1-trav:0.01157)0.837:0.01155)0.000:0.00055)0.852:0.02295,(V200RF-JABR01098604.1-trav:0.04684,(V128RF-AQIA01064138.1-trav:0.02358,(V213RF-AQIB01128644.1-trav:0.0,V59RF-JYKQ01054940.1-trav:0.0):0.02326)0.701:0.00053)0.789:0.01185)0.730:0.01729)0.867:0.11450)0.827:0.08834)0.984:0.30482,(V44RF-JZKE01143890.1-trav:0.20151,(V85RF-AGCE01026527.1-trav:0.04929,(V100RF-ABDC01533415.1-trav:0.19859,(((((V208RF-AQIB01128643.1-trav:0.01170,(V141RF-AQIA01064149.1-trav:0.0,V71RF-JYKQ01054957.1-trav:0.0):0.00055)0.000:0.00055,V32RF-AHZZ01098200.1-trav:0.02404)0.896:0.03343,V185RF-JABR01098598.1-trav:0.01777)0.795:0.01971,V119RF-ABGA01386446.1-trav:0.02363)0.787:0.01578,V78RF-ADFV01192039.1-trav:0.03327)0.752:0.01146)0.246:0.01084)0.926:0.16059)0.921:0.20568)0.486:0.18419)0.701:0.09225)0.947:0.51182)0.725:0.18189)0.819:0.30222)0.667:0.16129)0.899:0.27474,((((V19RF-JYKQ01005787.1-ighv:0.04549,(((V109RF-ADFV01131948.1-ighv:0.01144,((V31RF-CABD02136297.1-ighv:0.01904,V198RF-AACZ03173117.1-ighv:0.00055)0.851:0.00939,(V113RF-AACZ03107095.1-ighv:0.00055,V161RF-AACZ03173011.1-ighv:0.00939)0.000:0.00055)0.971:0.04688)0.764:0.01195,(V50RF-ABGA01099938.1-ighv:0.01014,(V123RF-CABD02117430.1-ighv:0.03956,(V38RF-AJFE01045035.1-ighv:0.0,V148RF-AACZ03171037.1-ighv:0.0):0.02155)0.548:0.01891)0.838:0.02462)0.979:0.06114,((V139RF-JYKQ01245900.1-ighv:0.01175,(V20RF-JABR01071886.1-ighv:0.01017,V53RF-JABR01090264.1-ighv:0.02127)0.943:0.04111)0.933:0.04423,((V252RF-AQIA01066387.1-ighv:0.00849,(V184RF-AACZ03098103.1-ighv:0.06801,(V99RF-AQIB01153491.1-ighv:0.0,V25RF-AHZZ01091600.1-ighv:0.0):0.00054)0.887:0.02494)0.768:0.01067,(V105RF-ADFV01131940.1-ighv:0.03325,((V16RF-AHZZ01069453.1-ighv:0.00054,V16RF-JYKQ01005777.1-ighv:0.02076)0.787:0.01024,(V19RF-AHZZ01069455.1-ighv:0.02547,V90RF-AACZ03097900.1-ighv:0.02677)0.746:0.01025)0.868:0.02143)0.886:0.02230)0.842:0.02109)0.847:0.02398)0.842:0.04049)0.995:0.40646,(V11RF-AHZZ01064625.1-ighv:0.04287,((V91RF-JABR01035060.1-ighv:0.02965,(V156RF-AQIA01075814.1-ighv:0.02924,((((V170RF-AQIA01075832.1-ighv:0.00054,((V173RF-AQIA01075832.1-ighv:0.02260,(V130RF-AQIB01153550.1-ighv:0.05218,V36RF-AHZZ01098950.1-ighv:0.00054)0.756:0.02550)0.762:0.01042,V139RF-JABR01077916.1-ighv:0.04587)0.778:0.01102)0.757:0.01054,((((V62RF-AHZZ01110760.1-ighv:0.04634,V241RF-AHZZ01108758.1-ighv:0.07157)0.841:0.01945,((((V37RF-AJFE01045032.1-ighv:0.00055,((V113RF-AGCE01148076.1-ighv:0.21090,(V28RF-ABGA01058270.1-ighv:0.06524,V126RF-CABD02117439.1-ighv:0.03202)0.680:0.00120)0.362:0.01470,(((V113RF-ADFV01131951.1-ighv:0.07771,V78RF-ABGA01243343.1-ighv:0.05302)0.300:0.02544,(V129RF-CABD02117445.1-ighv:0.04677,V108RF-AACZ03098148.1-ighv:0.06258)0.637:0.00598)0.867:0.03265,V125RF-CABD02117438.1-ighv:0.04527)0.002:0.00055)0.902:0.02189)0.323:0.00053,V192RF-AACZ03171126.1-ighv:0.04387)0.934:0.04639,((V13RF-AHZZ01064636.1-ighv:0.01916,(V197RF-JYKQ01056018.1-ighv:0.02217,V12RF-AHZZ01064628.1-ighv:0.10923)0.464:0.02687)0.870:0.02934,V121RF-AQIB01153517.1-ighv:0.00539)0.933:0.04167)0.287:0.01095,V140RF-JABR01077917.1-ighv:0.02958)0.886:0.02186)0.890:0.02053,(V230RF-AQIB01153518.1-ighv:0.03150,((V181RF-AQIA01075857.1-ighv:0.00073,V78RF-JYKQ01067101.1-ighv:0.01993)0.926:0.04115,((V176RF-AQIA01075844.1-ighv:0.03181,V21RF-JABR01074704.1-ighv:0.00997)0.768:0.01026,V180RF-AQIA01075856.1-ighv:0.02085)0.000:0.00055)0.753:0.01012)0.768:0.00994)0.762:0.00966,(((V168RF-JYKQ01042840.1-ighv:0.06379,V89RF-AQIB01153480.1-ighv:0.04579)0.733:0.01250,(((V200RF-AHZZ01090494.1-ighv:0.03050,(V209RF-AHZZ01096568.1-ighv:0.00054,V220RF-AHZZ01103258.1-ighv:0.01998)0.908:0.03147)0.930:0.04091,V136RF-JYKQ01245888.1-ighv:0.01683)0.791:0.01589,(V175RF-AQIA01075834.1-ighv:0.02169,(V182RF-AQIA01075859.1-ighv:0.02101,V71RF-AHZZ01129142.1-ighv:0.02206)0.784:0.01053)0.497:0.00895)0.775:0.01270)0.758:0.01040,(((V179RF-AQIA01075855.1-ighv:0.02113,(V26RF-AHZZ01091603.1-ighv:0.06545,V249RF-AHZZ01112481.1-ighv:0.04111)0.551:0.01514)0.888:0.02097,(((V74RF-ABGA01194064.1-ighv:0.0,V231RF-ABGA01360480.1-ighv:0.0):0.01452,(V130RF-CABD02117454.1-ighv:0.02041,(V159RF-AACZ03171037.1-ighv:0.0,V182RF-AACZ03098100.1-ighv:0.0):0.00054)0.781:0.01634)0.982:0.06691,(V174RF-AQIA01075834.1-ighv:0.05437,V102RF-AQIB01153492.1-ighv:0.03439)0.205:0.01475)0.915:0.00054)0.839:0.01232,((V183RF-AQIA01075860.1-ighv:0.02092,V35RF-AHZZ01098942.1-ighv:0.05703)0.803:0.00991,((V186RF-AQIA01075862.1-ighv:0.02089,V253RF-AQIA01066387.1-ighv:0.02218)0.669:0.01062,V161RF-AQIA01075818.1-ighv:0.04473)0.907:0.03095)0.000:0.00055)0.787:0.00999)0.771:0.00990)0.896:0.02086)0.721:0.00738,(((((V159RF-ABGA01203422.1-ighv:0.04597,((V20RF-JYKQ01005788.1-ighv:0.01167,((V163RF-AQIA01075821.1-ighv:0.00055,(V215RF-AHZZ01103093.1-ighv:0.00055,(V108RF-AQIB01153507.1-ighv:0.03345,V219RF-AHZZ01103097.1-ighv:0.00053)0.592:0.01075)0.927:0.02233)0.911:0.02232,V128RF-JYKQ01245876.1-ighv:0.02273)0.543:0.00055)0.893:0.02870,V20RF-AHZZ01069455.1-ighv:0.02791)0.438:0.02498)0.833:0.02689,V104RF-ABGA01313764.1-ighv:0.02645)0.754:0.01710,((V106RF-ADFV01131940.1-ighv:0.04552,(V61RF-ABGA01104800.1-ighv:0.01148,(V122RF-AQIB01153522.1-ighv:0.07377,V159RF-JYKQ01015003.1-ighv:0.05134)0.849:0.03020)0.639:0.00940)0.861:0.02583,(V20RF-ABGA01044307.1-ighv:0.00055,V107RF-AACZ03098146.1-ighv:0.04351)0.750:0.00736)0.836:0.00863)0.947:0.00084,((V30RF-ABGA01058270.1-ighv:0.09265,V18RF-ABGA01044306.1-ighv:0.02169)0.493:0.00054,((V17RF-ABGA01044305.1-ighv:0.02157,(V14RF-ABGA01044302.1-ighv:0.01051,V62RF-ABGA01104801.1-ighv:0.02104)0.000:0.00054)0.616:0.00054,((V101RF-ABGA01313761.1-ighv:0.01063,(V175RF-AHZZ01069461.1-ighv:0.03634,V47RF-ABGA01099934.1-ighv:0.04573)0.907:0.03728)0.980:0.00054,(V117RF-ADFV01131957.1-ighv:0.06408,V111RF-ADFV01131950.1-ighv:0.00055)0.871:0.01238)0.837:0.01111)0.707:0.01117)0.880:0.01120)0.889:0.00053,((V141RF-CABD02117482.1-ighv:0.02135,(V94RF-AACZ03097904.1-ighv:0.00055,(V44RF-AJFE01045051.1-ighv:0.00055,V95RF-AACZ03097905.1-ighv:0.03157)0.402:0.01065)0.898:0.02154)0.759:0.01069,((V16RF-ABGA01044304.1-ighv:0.00055,V13RF-ABGA01037228.1-ighv:0.01108)0.000:0.00054,(V104RF-AACZ03097916.1-ighv:0.01037,V111RF-AGCE01147923.1-ighv:0.10508)0.738:0.01187)0.939:0.03394)0.838:0.01065)0.868:0.01971)0.730:0.01609,V54RF-JABR01091180.1-ighv:0.03366)0.791:0.01575)0.064:0.01370)0.849:0.02836,V214RF-AHZZ01103093.1-ighv:0.03355)0.851:0.04491)0.217:0.11372)0.528:0.22287,(((((((((V9RF-ABGA01025808.1-ighv:0.05144,(V144RF-CABD02117492.1-ighv:0.04060,V89RF-AACZ03097900.1-ighv:0.02253)0.924:0.03163)0.748:0.01201,((((V114RF-ADFV01131954.1-ighv:0.00951,(V245RF-AQIA01066385.1-ighv:0.01527,V97RF-AQIB01153486.1-ighv:0.03115)0.951:0.04208)0.999:0.00099,((V47RF-AJFE01045051.1-ighv:0.0,V98RF-AACZ03097906.1-ighv:0.0):0.03217,(V137RF-CABD02117473.1-ighv:0.03284,V24RF-ABGA01044313.1-ighv:0.02128)0.873:0.00055)0.927:0.02137)0.807:0.01124,((V58RF-ABGA01099948.1-ighv:0.03365,(V53RF-ABGA01099941.1-ighv:0.02173,(V122RF-CABD02117421.1-ighv:0.02123,V151RF-AACZ03171037.1-ighv:0.02763)0.786:0.01686)0.864:0.02278)0.766:0.01565,((V255RF-AQIA01066395.1-ighv:0.01015,V257RF-AQIA01066397.1-ighv:0.03364)0.767:0.01318,(V171RF-JYKQ01042861.1-ighv:0.03269,(V91RF-AQIB01153482.1-ighv:0.01061,V42RF-JYKQ01041713.1-ighv:0.02129)0.778:0.01245)0.393:0.01102)0.857:0.02763)0.770:0.00924)0.884:0.02155,(V31RF-ABGA01058273.1-ighv:0.01045,V71RF-ABGA01174999.1-ighv:0.00054)0.956:0.03164)0.000:0.00055)0.836:0.01047,(((V100RF-JABR01063291.1-ighv:0.06503,((V192RF-AQIA01075867.1-ighv:0.00054,(V180RF-AHZZ01084892.1-ighv:0.03193,V7RF-JYKQ01005771.1-ighv:0.07790)0.891:0.04291)0.946:0.04264,((V137RF-AQIB01153556.1-ighv:0.07603,((V117RF-AQIB01153511.1-ighv:0.01025,V135RF-JYKQ01245888.1-ighv:0.02082)0.654:0.00055,(V211RF-AHZZ01096572.1-ighv:0.02071,V74RF-AHZZ01150255.1-ighv:0.05344)0.560:0.02085)0.875:0.02028)0.908:0.00055,V96RF-JABR01049702.1-ighv:0.05239)0.786:0.01056)0.863:0.02077)0.551:0.02076,(V18RF-JABR01070187.1-ighv:0.05142,(V73RF-ABGA01194059.1-ighv:0.02067,(V90RF-JABR01035060.1-ighv:0.00055,(V49RF-AHZZ01104761.1-ighv:0.01043,(V132RF-AQIB01153553.1-ighv:0.02083,V2RF-JYKQ01005758.1-ighv:0.08133)0.000:0.00055)0.892:0.02072)0.865:0.03226)0.916:0.04904)0.725:0.05267)0.348:0.00054,V107RF-ADFV01131944.1-ighv:0.04353)0.000:0.00053)0.860:0.01045,((V10RF-JABR01059011.1-ighv:0.02935,(V18RF-AHZZ01069455.1-ighv:0.03130,V18RF-JYKQ01005787.1-ighv:0.05014)0.959:0.06377)0.756:0.01317,(V167RF-AQIA01075826.1-ighv:0.01047,(V250RF-AHZZ01125719.1-ighv:0.02090,(V113RF-AQIB01153509.1-ighv:0.03181,(V199RF-AHZZ01090492.1-ighv:0.04295,V200RF-JYKQ01062881.1-ighv:0.03202)0.754:0.01066)0.756:0.01029)0.892:0.02091)0.814:0.01047)0.000:0.00055)0.782:0.01052,((V17RF-ABDC01314388.1-ighv:0.16067,(V65RF-ABDC01407894.1-ighv:0.01064,(V7RF-ABDC01231274.1-ighv:0.03273,V67RF-ABDC01417489.1-ighv:0.02098)0.893:0.00054)0.769:0.01450)0.473:0.02123,V43RF-ABDC01375549.1-ighv:0.05878)0.723:0.00677)0.922:0.02145,(((V240RF-AQIA01066366.1-ighv:0.02020,((V239RF-AQIA01066362.1-ighv:0.00054,(V14RF-AHZZ01069449.1-ighv:0.0,V14RF-JYKQ01005774.1-ighv:0.0):0.01063)0.901:0.02151,(((((V140RF-AQIB01153558.1-ighv:0.00053,V177RF-AHZZ01084890.1-ighv:0.03188)0.729:0.01859,(V54RF-ABGA01099945.1-ighv:0.02656,V32RF-CABD02136313.1-ighv:0.06850)0.905:0.04346)0.808:0.02783,(V116RF-AGCE01148199.1-ighv:0.07434,V88RF-JABR01035059.1-ighv:0.04369)0.459:0.01345)0.580:0.00285,(V120RF-ADFV01131961.1-ighv:0.01068,V148RF-ADFV01143437.1-ighv:0.04367)0.807:0.01091)0.783:0.01238,(V144RF-AQIB01153566.1-ighv:0.01162,V131RF-JYKQ01245881.1-ighv:0.04282)0.709:0.01099)0.681:0.00054)0.748:0.00054)0.133:0.01187,V3RF-ABGA01025791.1-ighv:0.04179)0.907:0.04377,V62RF-AGCE01147865.1-ighv:0.11017)0.657:0.00053)0.828:0.02021,((V2RF-ABGA01025790.1-ighv:0.07584,(V110RF-AQIB01153507.1-ighv:0.07356,(V90RF-AQIB01153481.1-ighv:0.02884,((((V166RF-AQIA01075825.1-ighv:0.02006,(V85RF-JABR01004698.1-ighv:0.01000,V56RF-JABR01091180.1-ighv:0.01999)1.000:0.00055)0.713:0.00894,(V6RF-ABGA01025808.1-ighv:0.02028,(V4RF-AJFE01011110.1-ighv:0.01007,V87RF-AACZ03097899.1-ighv:0.02047)0.861:0.02025)0.877:0.01995)0.765:0.01060,V254RF-AQIA01066395.1-ighv:0.03980)0.770:0.02082,V40RF-JYKQ01041713.1-ighv:0.02013)0.919:0.03744)0.738:0.00701)0.878:0.03628)0.943:0.05499,((V158RF-AQIA01075814.1-ighv:0.03312,((V190RF-AQIA01075865.1-ighv:0.03091,((V57RF-JABR01091180.1-ighv:0.03108,(((((V227RF-AQIB01145361.1-ighv:0.0,V228RF-AQIB01145362.1-ighv:0.0):0.02088,V39RF-AHZZ01100290.1-ighv:0.00055)0.969:0.09586,V41RF-JYKQ01041713.1-ighv:0.17311)0.819:0.02517,(V15RF-AHZZ01069451.1-ighv:0.01359,(V235RF-AQIA01066360.1-ighv:0.00054,V15RF-JYKQ01005777.1-ighv:0.02079)0.787:0.01033)0.774:0.02780)0.000:0.00054,(V148RF-CABD02117545.1-ighv:0.03108,(V161RF-AJFE01119883.1-ighv:0.01003,V110RF-AACZ03102011.1-ighv:0.02038)0.861:0.00055)0.981:0.06360)0.778:0.01032)0.875:0.02121,(V182RF-AHZZ01084893.1-ighv:0.01025,V111RF-AQIB01153507.1-ighv:0.05172)0.000:0.00055)0.839:0.01015)0.000:0.00054,((((V145RF-CABD02117494.1-ighv:0.01028,V88RF-AACZ03097900.1-ighv:0.02071)0.943:0.03088,V135RF-AQIB01153555.1-ighv:0.01026)0.781:0.01024,V5RF-JYKQ01005769.1-ighv:0.04167)0.000:0.00054,V7RF-ABGA01025808.1-ighv:0.02055)0.839:0.01024)0.783:0.01033)0.858:0.02026,V22RF-JABR01074958.1-ighv:0.05052)0.617:0.00249)0.839:0.02261)0.951:0.12487,((((V6RF-ABDC01231272.1-ighv:0.01110,V40RF-ABDC01373300.1-ighv:0.00053)0.954:0.06523,(V11RF-ABDC01282063.1-ighv:0.08801,(V96RF-JZKE01278611.1-ighv:0.02602,(V11RF-JZKE01244709.1-ighv:0.04764,V80RF-JZKE01278253.1-ighv:0.03183)0.263:0.02137)0.962:0.07767)0.154:0.01397)0.869:0.04644,((V114RF-ABDC01345814.1-ighv:0.02234,V115RF-ABDC01345817.1-ighv:0.01136)0.940:0.05013,V8RF-ABDC01231277.1-ighv:0.11949)0.000:0.01092)0.924:0.03644,((((V0RF-ABDC01047890.1-ighv:0.20722,(((V97RF-JZKE01278611.1-ighv:0.04191,(V82RF-JZKE01278267.1-ighv:0.08875,(V79RF-JZKE01278249.1-ighv:0.07266,V87RF-JZKE01278276.1-ighv:0.02800)0.287:0.01285)0.505:0.03489)0.254:0.01607,(V94RF-JZKE01278610.1-ighv:0.04635,V98RF-JZKE01278614.1-ighv:0.08345)0.839:0.03297)0.656:0.00053,(((V70RF-JZKE01235368.1-ighv:0.03416,V81RF-JZKE01278255.1-ighv:0.00054)0.941:0.03376,(V76RF-JZKE01255181.1-ighv:0.05556,(((V30RF-JZKE01255160.1-ighv:0.08746,(V13RF-JZKE01244715.1-ighv:0.06241,(V86RF-JZKE01278273.1-ighv:0.00055,V90RF-JZKE01278602.1-ighv:0.05374)0.971:0.06700)0.787:0.02167)0.619:0.00264,V83RF-JZKE01278268.1-ighv:0.03456)0.742:0.01050,V92RF-JZKE01278607.1-ighv:0.01289)0.732:0.00055)0.732:0.00958)0.794:0.01285,(((V93RF-JZKE01278609.1-ighv:0.05350,V77RF-JZKE01255182.1-ighv:0.06375)0.000:0.00053,((V9RF-JZKE01244686.1-ighv:0.10774,((V89RF-JZKE01278602.1-ighv:0.05653,(V12RF-JZKE01244710.1-ighv:0.03253,V91RF-JZKE01278605.1-ighv:0.03606)0.772:0.02202)0.656:0.01124,V78RF-JZKE01278248.1-ighv:0.04438)0.806:0.02598)0.654:0.00509,V84RF-JZKE01278271.1-ighv:0.04800)0.791:0.01177)0.000:0.00054,(V133RF-AQIB01153553.1-ighv:0.04775,((V174RF-AHZZ01069458.1-ighv:0.02216,(V247RF-AQIA01066387.1-ighv:0.00055,(((V171RF-AQIA01075832.1-ighv:0.01405,V119RF-AQIB01153511.1-ighv:0.06654)0.848:0.02122,V210RF-AHZZ01096568.1-ighv:0.01096)0.774:0.01091,V137RF-JYKQ01245889.1-ighv:0.04681)0.771:0.01086)0.774:0.01150)0.923:0.01859,V44RF-JYKQ01041713.1-ighv:0.01320)0.761:0.00988)0.898:0.02258)0.795:0.01178)0.728:0.00824)0.764:0.02207)0.242:0.00084,(V88RF-JZKE01278277.1-ighv:0.03321,V95RF-JZKE01278610.1-ighv:0.06897)0.973:0.05881)0.917:0.03521,((V7RF-AJFE01011113.1-ighv:0.0,V93RF-AACZ03097900.1-ighv:0.0):0.05255,((V45RF-AJFE01045051.1-ighv:0.0,V96RF-AACZ03097906.1-ighv:0.0):0.01095,(V143RF-CABD02117487.1-ighv:0.02608,V92RF-AACZ03097900.1-ighv:0.00055)0.000:0.00055)0.776:0.02285)0.605:0.02045)0.768:0.01741,(((V197RF-AQIB01086294.1-ighv:0.01926,V76RF-JYKQ01067073.1-ighv:0.04075)1.000:0.18782,(((((V40RF-AJFE01045037.1-ighv:0.02316,V150RF-AACZ03171037.1-ighv:0.00054)0.960:0.03422,(V5RF-ABGA01025797.1-ighv:0.03430,V57RF-ABGA01099947.1-ighv:0.04426)0.914:0.03365)0.989:0.00054,(V34RF-AQIA01007915.1-ighv:0.16947,V74RF-ABDC01423814.1-ighv:0.05705)0.682:0.02297)0.752:0.00994,V139RF-CABD02117477.1-ighv:0.04390)0.929:0.04314,((V52RF-ABGA01099941.1-ighv:0.06085,((V112RF-AQIB01153509.1-ighv:0.03268,(V130RF-JYKQ01245880.1-ighv:0.01063,(V231RF-AQIB01158235.1-ighv:0.02148,(V118RF-AQIB01153511.1-ighv:0.01058,(V134RF-JYKQ01245886.1-ighv:0.01069,(V212RF-AHZZ01096574.1-ighv:0.01061,V259RF-AQIA01073275.1-ighv:0.00055)0.000:0.00055)0.769:0.01081)0.976:0.05823)0.745:0.01039)0.802:0.01867)0.659:0.00526,((V191RF-AQIA01075867.1-ighv:0.04444,(V138RF-AQIB01153557.1-ighv:0.02234,(((V193RF-AQIA01075868.1-ighv:0.00055,V179RF-AHZZ01084892.1-ighv:0.02213)0.796:0.01097,V6RF-JYKQ01005770.1-ighv:0.03297)0.906:0.02158,V181RF-AHZZ01084892.1-ighv:0.04618)0.896:0.00053)0.343:0.01074)0.761:0.01268,(V8RF-ABGA01025808.1-ighv:0.05089,V110RF-ADFV01131950.1-ighv:0.05954)0.526:0.01522)0.849:0.02973)0.866:0.02960)0.783:0.02084,(V136RF-AQIB01153555.1-ighv:0.07164,V58RF-ADFV01136793.1-ighv:0.02546)0.767:0.03191)0.380:0.01792)0.608:0.00311)0.777:0.01417,(((((((V136RF-CABD02117471.1-ighv:0.04666,(V115RF-AJFE01045439.1-ighv:0.01083,V155RF-AACZ03171037.1-ighv:0.02151)0.872:0.02237)0.701:0.01315,((V141RF-AQIB01153561.1-ighv:0.03238,(V188RF-AQIA01075862.1-ighv:0.01067,((V3RF-JYKQ01005763.1-ighv:0.01115,V10RF-JYKQ01005773.1-ighv:0.04224)0.322:0.01073,V65RF-AHZZ01113072.1-ighv:0.02048)0.759:0.01107)0.778:0.01055)0.986:0.08366,V130RF-ABDC01471087.1-ighv:0.09699)0.647:0.00545)0.838:0.03275,(((V187RF-AQIA01075862.1-ighv:0.05714,V141RF-JABR01077917.1-ighv:0.04649)0.878:0.02426,((V92RF-JABR01035060.1-ighv:0.04416,(V131RF-CABD02117457.1-ighv:0.00729,V103RF-AACZ03097912.1-ighv:0.01425)0.993:0.10872)0.874:0.03239,((V85RF-JZKE01278271.1-ighv:0.08576,V113RF-ABDC01345813.1-ighv:0.04734)0.738:0.03164,(V79RF-ABGA01243345.1-ighv:0.01132,(V29RF-ABGA01058270.1-ighv:0.03296,V67RF-ABGA01174988.1-ighv:0.00055)0.957:0.04480)0.726:0.00607)0.831:0.01648)0.480:0.01113)0.763:0.01744,((V127RF-CABD02117442.1-ighv:0.03267,V128RF-CABD02117444.1-ighv:0.00055)0.885:0.02663,(V106RF-AACZ03098145.1-ighv:0.03340,V109RF-AACZ03098176.1-ighv:0.03410)0.773:0.01772)0.911:0.04654)0.891:0.04969)0.954:0.06387,((((V71RF-AGCE01148057.1-ighv:0.05994,((((((V184RF-AQIA01075862.1-ighv:0.01402,V131RF-AQIB01153553.1-ighv:0.05641)0.646:0.01132,(V23RF-AHZZ01091599.1-ighv:0.03680,(V46RF-JYKQ01041718.1-ighv:0.06738,V251RF-JYKQ01237599.1-ighv:0.01826)0.752:0.03162)0.803:0.01964)0.768:0.01285,((V164RF-AQIA01075823.1-ighv:0.05884,V50RF-AHZZ01104763.1-ighv:0.02042)0.685:0.02496,V249RF-AQIA01066387.1-ighv:0.00498)0.787:0.01929)0.953:0.07850,V86RF-JABR01011024.1-ighv:0.05976)0.793:0.00053,(((V243RF-AQIA01066378.1-ighv:0.03287,V9RF-JYKQ01005772.1-ighv:0.01070)0.932:0.03364,(((V96RF-AQIB01153485.1-ighv:0.03437,V48RF-AHZZ01104760.1-ighv:0.04564)0.750:0.01153,V93RF-AQIB01153482.1-ighv:0.05524)0.811:0.02295,V178RF-AHZZ01084890.1-ighv:0.02100)0.760:0.01248)0.846:0.02222,V89RF-JABR01035059.1-ighv:0.05678)0.743:0.01143)0.870:0.02287,V115RF-AGCE01148188.1-ighv:0.08849)0.788:0.00054)0.912:0.02198,(((V60RF-ABGA01099956.1-ighv:0.02790,((V17RF-JYKQ01005784.1-ighv:0.01095,(V237RF-AQIA01066360.1-ighv:0.04515,V17RF-AHZZ01069455.1-ighv:0.00055)0.876:0.02269)0.878:0.02872,(V21RF-AHZZ01069456.1-ighv:0.00055,V21RF-JYKQ01005789.1-ighv:0.01132)0.843:0.02530)0.337:0.01494)0.926:0.03861,(V66RF-AGCE01147874.1-ighv:0.07018,((((V12RF-ABGA01025810.1-ighv:0.07347,V55RF-ABGA01099946.1-ighv:0.04837)0.756:0.01556,(V118RF-CABD02117398.1-ighv:0.04727,(V19RF-JABR01070187.1-ighv:0.01692,(V162RF-AQIA01075820.1-ighv:0.02262,V127RF-JYKQ01245874.1-ighv:0.01101)0.865:0.02153)0.893:0.04138)0.429:0.01157)0.795:0.01307,(((V34RF-CABD02136430.1-ighv:0.0,V151RF-CABD02136430.1-ighv:0.0):0.02279,(V197RF-AACZ03172650.1-ighv:0.00055,V168RF-AACZ03179884.1-ighv:0.01136)0.000:0.00054)0.939:0.03421,V133RF-CABD02117467.1-ighv:0.10764)0.759:0.01120)0.000:0.00054,(V196RF-JYKQ01056010.1-ighv:0.00055,(V9RF-AHZZ01064615.1-ighv:0.06099,V15RF-JABR01066987.1-ighv:0.03470)0.000:0.00054)0.977:0.04627)0.278:0.01144)0.775:0.01150)0.874:0.02457,(V60RF-AGCE01147864.1-ighv:0.02198,(V68RF-AGCE01147944.1-ighv:0.07431,V67RF-AGCE01147875.1-ighv:0.04515)0.893:0.03844)0.780:0.02299)0.754:0.01036)0.629:0.00055,(((((((V1RF-AJFE01003265.1-ighv:0.0,V112RF-AACZ03106490.1-ighv:0.0):0.04302,((V3RF-AJFE01011110.1-ighv:0.0,V86RF-AACZ03097899.1-ighv:0.0):0.00054,V146RF-CABD02117499.1-ighv:0.01054)0.796:0.01062)0.280:0.00964,(V55RF-JABR01091180.1-ighv:0.03142,V84RF-JABR01004698.1-ighv:0.18319)0.858:0.04577)0.448:0.01156,V129RF-JYKQ01245876.1-ighv:0.03242)0.758:0.01128,V165RF-AQIA01075825.1-ighv:0.03262)0.763:0.01529,V109RF-AQIB01153507.1-ighv:0.03252)0.811:0.02037,((V58RF-AGCE01147750.1-ighv:0.14343,V24RF-AHZZ01091599.1-ighv:0.15567)0.938:0.08131,((V10RF-ABDC01282057.1-ighv:0.03367,(V72RF-ABDC01421861.1-ighv:0.08651,(V12RF-ABDC01282065.1-ighv:0.12132,(V42RF-ABDC01375549.1-ighv:0.0,V83RF-ABDC01454767.1-ighv:0.0):0.05414)0.772:0.02291)0.844:0.03102)0.483:0.00055,V41RF-ABDC01373301.1-ighv:0.02273)0.795:0.03412)0.796:0.02294)0.767:0.01597)0.481:0.01215,((((V44RF-ABDC01377237.1-ighv:0.04093,(V4RF-ABDC01231268.1-ighv:0.00055,V133RF-ABDC01493416.1-ighv:0.01116)0.924:0.04115)0.685:0.01971,V9RF-ABDC01282056.1-ighv:0.13494)0.440:0.01864,V65RF-AGCE01147870.1-ighv:0.16436)0.085:0.01781,((V51RF-AJFE01045053.1-ighv:0.0,V105RF-AACZ03097919.1-ighv:0.0):0.19804,((V238RF-AQIA01066362.1-ighv:0.0,V242RF-AQIA01066369.1-ighv:0.0):0.03278,V13RF-JYKQ01005774.1-ighv:0.03298)0.997:0.20712)0.761:0.02887)0.714:0.01491)0.496:0.01858)0.769:0.02413,(V120RF-CABD02117419.1-ighv:0.02298,(V138RF-JABR01077916.1-ighv:0.03189,(V218RF-AHZZ01103097.1-ighv:0.03306,(V172RF-AQIA01075832.1-ighv:0.03413,V138RF-JYKQ01245890.1-ighv:0.00054)0.790:0.01104)0.791:0.01425)0.921:0.04096)0.761:0.01149)0.412:0.01322,((V25RF-ABGA01044314.1-ighv:0.06732,V236RF-AQIA01066360.1-ighv:0.07023)0.816:0.02496,((((((((((((V126RF-JYKQ01245874.1-ighv:0.03286,V105RF-AQIB01153501.1-ighv:0.10446)0.677:0.02422,(V140RF-JYKQ01245904.1-ighv:0.03604,V80RF-JYKQ01086555.1-ighv:0.01107)0.837:0.02846)0.631:0.00444,V123RF-AQIB01153537.1-ighv:0.04609)0.864:0.03144,((V119RF-CABD02117416.1-ighv:0.07370,(V129RF-AQIB01153543.1-ighv:0.01098,V216RF-AHZZ01103094.1-ighv:0.02282)0.882:0.03360)0.129:0.00251,V116RF-CABD02117395.1-ighv:0.03354)0.803:0.01590)0.278:0.01152,V27RF-ABGA01044319.1-ighv:0.03878)0.767:0.01762,(V132RF-CABD02117463.1-ighv:0.05337,V102RF-AACZ03097910.1-ighv:0.00054)0.703:0.01466)0.755:0.02519,(V43RF-AJFE01045048.1-ighv:0.00055,V153RF-AACZ03171037.1-ighv:0.01143)0.783:0.01430)0.865:0.03777,V122RF-ABDC01396906.1-ighv:0.06045)0.820:0.02639,V10RF-JZKE01244690.1-ighv:0.08167)0.877:0.03963,V118RF-AGCE01148386.1-ighv:0.07280)0.869:0.03735,((((((V72RF-ABGA01174999.1-ighv:0.10148,V117RF-ABGA01384193.1-ighv:0.03336)0.849:0.02673,(V121RF-CABD02117420.1-ighv:0.01577,((V118RF-AJFE01045453.1-ighv:0.04466,(V56RF-ABGA01099946.1-ighv:0.07109,(V152RF-CABD02136430.1-ighv:0.02179,(V169RF-AACZ03182257.1-ighv:0.01102,V196RF-AACZ03172648.1-ighv:0.00055)0.919:0.00054)0.936:0.04446)0.854:0.02359)0.868:0.02874,V104RF-ADFV01131940.1-ighv:0.02719)0.857:0.03607)0.599:0.01563)0.751:0.00714,((V168RF-AQIA01075827.1-ighv:0.01064,V251RF-AHZZ01125719.1-ighv:0.00055)0.993:0.08081,(V197RF-AHZZ01090491.1-ighv:0.01064,V198RF-JYKQ01062878.1-ighv:0.02132)0.870:0.02141)0.779:0.01075)0.000:0.00054,(V42RF-AJFE01045041.1-ighv:0.02208,V152RF-AACZ03171037.1-ighv:0.01114)0.767:0.01099)0.761:0.01131,V115RF-ADFV01131956.1-ighv:0.06556)0.758:0.01138,V117RF-AJFE01045447.1-ighv:0.07932)0.751:0.01121)0.788:0.01356,((((V104RF-AQIB01153501.1-ighv:0.00055,V48RF-JYKQ01041718.1-ighv:0.05578)0.963:0.04825,(V81RF-JABR01004697.1-ighv:0.04918,(V92RF-AQIB01153482.1-ighv:0.02162,((V246RF-AQIA01066387.1-ighv:0.04380,(V159RF-AQIA01075814.1-ighv:0.03247,V114RF-AQIB01153509.1-ighv:0.02257)0.534:0.02147)0.739:0.00054,V173RF-AHZZ01069458.1-ighv:0.07845)0.758:0.01061)0.942:0.05299)0.437:0.01164)0.913:0.05136,(V251RF-AQIA01066387.1-ighv:0.12206,V11RF-JABR01059011.1-ighv:0.05992)0.884:0.03585)0.826:0.02406,(V123RF-ADFV01131961.1-ighv:0.01101,(V112RF-ADFV01131951.1-ighv:0.01131,V10RF-ABGA01025808.1-ighv:0.12051)0.771:0.01078)0.381:0.01375)0.558:0.00869)0.764:0.01047)0.767:0.01012)0.933:0.05059,(V41RF-AJFE01045037.1-ighv:0.03868,(V21RF-ABGA01044310.1-ighv:0.05393,(V158RF-ABGA01203420.1-ighv:0.06203,(V194RF-AQIA01075868.1-ighv:0.03263,V139RF-AQIB01153557.1-ighv:0.03544)0.970:0.08410)0.493:0.03222)0.886:0.03857)0.619:0.01056)0.942:0.00060)0.795:0.01257)0.175:0.00055)0.846:0.04089)0.883:0.12205,(((((V59RF-AGCE01147864.1-ighv:0.02105,V73RF-AGCE01148231.1-ighv:0.03455)0.938:0.05397,((V46RF-AJFE01045051.1-ighv:0.0,V97RF-AACZ03097906.1-ighv:0.0):0.01953,V138RF-CABD02117475.1-ighv:0.02599)0.428:0.02578)0.759:0.02115,(V59RF-ABGA01099955.1-ighv:0.01000,V115RF-ABGA01362157.1-ighv:0.01145)0.952:0.04423)0.318:0.00054,((V176RF-AHZZ01084887.1-ighv:0.00055,((((V93RF-JABR01035060.1-ighv:0.00055,V206RF-JABR01190886.1-ighv:0.01095)0.796:0.01092,(V134RF-AQIB01153555.1-ighv:0.02306,(V4RF-JYKQ01005763.1-ighv:0.02157,(V189RF-AQIA01075862.1-ighv:0.00054,(V23RF-ABGA01044310.1-ighv:0.03250,V183RF-AHZZ01084896.1-ighv:0.02179)0.094:0.01056)0.855:0.02199)0.768:0.01068)0.753:0.01078)0.865:0.02189,(V11RF-JYKQ01005773.1-ighv:0.0,V12RF-JYKQ01005774.1-ighv:0.0):0.02108)0.757:0.01059,((V142RF-AQIB01153564.1-ighv:0.03260,V143RF-AQIB01153565.1-ighv:0.02113)0.878:0.02144,V241RF-AQIA01066369.1-ighv:0.01050)0.888:0.02142)0.770:0.01041)0.957:0.03246,V116RF-ADFV01131956.1-ighv:0.00055)0.573:0.01060)0.994:0.29696,((((V102RF-ADFV01131938.1-ighv:0.0,V103RF-ADFV01131939.1-ighv:0.0):0.02167,(V169RF-AQIA01075830.1-ighv:0.02317,(V13RF-JABR01059012.1-ighv:0.02618,(V132RF-JYKQ01245882.1-ighv:0.00055,(V70RF-AHZZ01124687.1-ighv:0.0,V252RF-AHZZ01125719.1-ighv:0.0,V253RF-AHZZ01181503.1-ighv:0.0):0.03171)0.761:0.01228)0.451:0.00947)0.914:0.03450)0.433:0.02128,((V49RF-ABGA01099935.1-ighv:0.0,V227RF-ABGA01354649.1-ighv:0.0):0.13120,((V124RF-CABD02117431.1-ighv:0.00054,((V256RF-AQIA01066397.1-ighv:0.02152,V39RF-JYKQ01041707.1-ighv:0.00055)0.917:0.04627,(V147RF-CABD02117506.1-ighv:0.00055,(V0RF-ABGA01025787.1-ighv:0.04464,(V2RF-AJFE01011107.1-ighv:0.01082,V85RF-AACZ03097899.1-ighv:0.00055)0.067:0.00052)0.918:0.01034)0.793:0.04102)0.878:0.03329)0.921:0.03201,V158RF-AACZ03171037.1-ighv:0.01043)0.898:0.00054)0.847:0.01792)0.961:0.13379,(((V90RF-AJFE01010857.1-ighv:0.17776,((V63RF-AGCE01147866.1-ighv:0.14055,(V10RF-AHZZ01064617.1-ighv:0.04720,(V127RF-AQIB01153541.1-ighv:0.01669,V160RF-JYKQ01015024.1-ighv:0.05301)0.924:0.04773)0.952:0.06687)0.000:0.00727,(V143RF-JABR01086102.1-ighv:0.00055,((V16RF-JABR01066987.1-ighv:0.07331,(((V201RF-AHZZ01090495.1-ighv:0.02196,V169RF-JYKQ01042857.1-ighv:0.01033)0.980:0.06792,(V178RF-AQIA01075848.1-ighv:0.01134,(V125RF-AQIB01153538.1-ighv:0.05438,V100RF-AQIB01153491.1-ighv:0.04400)0.395:0.01048)0.730:0.00148)0.857:0.03132,((V14RF-JABR01062345.1-ighv:0.03205,(V52RF-JABR01089346.1-ighv:0.03096,V104RF-JABR01068488.1-ighv:0.02024)0.919:0.03081)0.838:0.02194,(V124RF-ADFV01131961.1-ighv:0.05537,(V117RF-CABD02117395.1-ighv:0.05447,(V11RF-ABGA01025808.1-ighv:0.08801,(V6RF-AJFE01011111.1-ighv:0.0,V91RF-AACZ03097900.1-ighv:0.0):0.00054)0.283:0.01137)0.918:0.04201)0.897:0.03380)0.736:0.01160)0.740:0.01101)0.000:0.00054,V142RF-JABR01078980.1-ighv:0.07060)0.268:0.02168)0.992:0.09275)0.746:0.03724)0.730:0.01897,((V97RF-JABR01055994.1-ighv:0.03115,(V77RF-JYKQ01067101.1-ighv:0.04281,(V177RF-AQIA01075848.1-ighv:0.04234,V124RF-AQIB01153538.1-ighv:0.01041)0.468:0.01033)0.028:0.00053)0.868:0.02844,(V116RF-AJFE01045444.1-ighv:0.0,V154RF-AACZ03171037.1-ighv:0.0):0.05781)0.762:0.01286)0.816:0.02066,((((((V69RF-AGCE01147945.1-ighv:0.04557,V114RF-AGCE01148081.1-ighv:0.09133)0.592:0.03833,(V57RF-AGCE01147749.1-ighv:0.06040,(((V58RF-AHZZ01108247.1-ighv:0.03560,(V133RF-JYKQ01245882.1-ighv:0.01915,(V258RF-AQIA01073275.1-ighv:0.02529,V116RF-AQIB01153509.1-ighv:0.07743)0.473:0.02202)0.857:0.02501)0.693:0.00994,(V213RF-AHZZ01096575.1-ighv:0.04033,V172RF-JABR01092598.1-ighv:0.02076)0.802:0.02042)0.891:0.02353,((V108RF-ADFV01131946.1-ighv:0.02618,V119RF-ADFV01131959.1-ighv:0.04360)0.890:0.04657,((V51RF-ABGA01099940.1-ighv:0.03899,((V244RF-AQIA01066385.1-ighv:0.04327,V98RF-AQIB01153489.1-ighv:0.01098)0.972:0.06770,(V70RF-ABGA01174995.1-ighv:0.04926,V57RF-ADFV01136793.1-ighv:0.15071)0.248:0.01138)0.770:0.02036)0.774:0.02924,(V39RF-AJFE01045037.1-ighv:0.00055,V149RF-AACZ03171037.1-ighv:0.01062)0.858:0.02568)0.972:0.09539)0.734:0.00936)0.970:0.07641)0.919:0.06585)0.712:0.01239,(V125RF-JYKQ01245859.1-ighv:0.01104,V199RF-JYKQ01062881.1-ighv:0.04434)0.776:0.01029)0.797:0.01115,(V72RF-AGCE01148067.1-ighv:0.06498,(V83RF-JABR01004697.1-ighv:0.01052,(V22RF-AHZZ01091598.1-ighv:0.02184,((V248RF-AQIA01066387.1-ighv:0.0,V95RF-AQIB01153484.1-ighv:0.0):0.00055,V45RF-JYKQ01041718.1-ighv:0.01089)0.000:0.00054)0.927:0.03341)0.997:0.10020)0.794:0.01690)0.404:0.00053,((((V101RF-AQIB01153491.1-ighv:0.06994,(V106RF-AQIB01153504.1-ighv:0.0,V107RF-AQIB01153506.1-ighv:0.0):0.08237)0.958:0.08253,V68RF-ABGA01174994.1-ighv:0.12989)0.699:0.01312,((V183RF-AACZ03098100.1-ighv:0.00054,(V114RF-CABD02117385.1-ighv:0.01002,V230RF-ABGA01360478.1-ighv:0.09305)0.982:0.00055)0.952:0.04861,((V142RF-CABD02117482.1-ighv:0.01596,((V64RF-AHZZ01111405.1-ighv:0.02567,V126RF-AQIB01153538.1-ighv:0.13423)0.875:0.04315,(V15RF-ABGA01044302.1-ighv:0.0,V103RF-ABGA01313763.1-ighv:0.0):0.03640)0.294:0.01012)0.864:0.02591,V118RF-ADFV01131958.1-ighv:0.00054)0.972:0.06080)0.273:0.01119)0.858:0.02733,(V109RF-AGCE01147916.1-ighv:0.06336,((V128RF-AQIB01153541.1-ighv:0.03265,V161RF-JYKQ01015026.1-ighv:0.00054)0.429:0.02521,((V50RF-AJFE01045051.1-ighv:0.0,V101RF-AACZ03097906.1-ighv:0.0):0.03240,V135RF-CABD02117467.1-ighv:0.02171)0.923:0.04030)0.709:0.03337)0.948:0.06176)0.131:0.01047)0.756:0.01059,(((((V54RF-ABDC01391612.1-ighv:0.03424,V125RF-ABDC01419594.1-ighv:0.05577)0.885:0.02304,(V48RF-ABGA01099934.1-ighv:0.07341,(V94RF-AQIB01153484.1-ighv:0.05204,V82RF-JABR01004697.1-ighv:0.02073)0.939:0.04220)0.985:0.09202)0.077:0.00843,V110RF-AGCE01147919.1-ighv:0.06547)0.739:0.00982,((V103RF-AQIB01153498.1-ighv:0.02205,(V157RF-AQIA01075814.1-ighv:0.00055,V198RF-AHZZ01090492.1-ighv:0.01067)0.771:0.01114)0.879:0.02365,((V149RF-CABD02117766.1-ighv:0.01186,(V181RF-AACZ03098097.1-ighv:0.08861,V150RF-CABD02117767.1-ighv:0.02170)0.781:0.00947)0.399:0.01173,V229RF-ABGA01360476.1-ighv:0.10167)0.837:0.03217)0.812:0.01969)0.901:0.02528,(((V160RF-AJFE01119867.1-ighv:0.02967,V111RF-AACZ03102011.1-ighv:0.01389)1.000:0.15610,V101RF-ADFV01131933.1-ighv:0.06662)0.101:0.00161,((V49RF-AJFE01045051.1-ighv:0.0,V100RF-AACZ03097906.1-ighv:0.0):0.06408,(V33RF-CABD02136332.1-ighv:0.0,V134RF-CABD02117467.1-ighv:0.0):0.01708)0.774:0.01237)0.915:0.04498)0.525:0.00052)0.762:0.00960)0.948:0.09245)0.896:0.15335)0.981:0.24417)0.182:0.16909)1.000:0.91082,((((V80RF-JABR01196792.1-trbv:0.02063,(V123RF-AHZZ01067647.1-trbv:0.03041,(V118RF-JYKQ01131111.1-trbv:0.03033,(V121RF-AQIA01048536.1-trbv:0.0,V196RF-AQIB01162321.1-trbv:0.0):0.00055)0.000:0.00055)0.748:0.00983)0.767:0.01478,((((V77RF-AJFE01104369.1-trbv:0.0,V54RF-AACZ03067007.1-trbv:0.0):0.02502,V112RF-CABD02377030.1-trbv:0.02839)0.933:0.03718,(V124RF-AJFE01070459.1-trbv:0.00055,V50RF-AACZ03053995.1-trbv:0.01005)0.870:0.02004)0.777:0.01110,(V32RF-ADFV01062085.1-trbv:0.04050,V46RF-ABGA01091263.1-trbv:0.01006)0.384:0.00054)0.718:0.01573)0.986:1.15087,(V73RF-AJFE01070458.1-trbv:0.01153,V179RF-AACZ03054006.1-trbv:0.00055)0.999:1.36729)0.005:0.07630,((((((V197RF-ABGA01277802.1-trbv:0.00054,(V17RF-AACZ03053981.1-trbv:0.02322,V78RF-CABD02352499.1-trbv:0.02323)0.784:0.01149)0.789:0.02211,V13RF-ADFV01062075.1-trbv:0.01547)0.882:0.03738,(((V158RF-AHZZ01067653.1-trbv:0.00055,V85RF-AQIA01048528.1-trbv:0.03627)0.865:0.01154,(V162RF-AQIB01162313.1-trbv:0.01138,V155RF-JABR01088215.1-trbv:0.01121)1.000:0.00055)0.819:0.01157,V37RF-JYKQ01029811.1-trbv:0.01143)0.730:0.00714)0.993:0.24216,((V107RF-JZKE01294669.1-trbv:0.09787,(V18RF-AGCE01062008.1-trbv:0.05184,(V19RF-ADFV01062075.1-trbv:0.01649,((V154RF-AJFE01070463.1-trbv:0.0,V34RF-AACZ03053988.1-trbv:0.0):0.02299,V93RF-CABD02352512.1-trbv:0.00055)0.939:0.04240)0.890:0.04290)0.926:0.09199)0.981:0.18682,((V208RF-ABGA01277825.1-trbv:0.03504,(((V29RF-JYKQ01029807.1-trbv:0.03403,(V77RF-AQIA01048525.1-trbv:0.03433,V154RF-AQIB01162312.1-trbv:0.02291)0.772:0.01237)0.904:0.03305,((V34RF-AJFE01039607.1-trbv:0.0,V6RF-AACZ03053974.1-trbv:0.0):0.01126,V68RF-CABD02352480.1-trbv:0.02298)0.899:0.02307)0.692:0.00054,V6RF-ADFV01062069.1-trbv:0.02319)0.622:0.02405)0.967:0.11239,(V3RF-AGCE01061995.1-trbv:0.13053,(((V154RF-JABR01088215.1-trbv:0.06972,(V196RF-ABGA01277802.1-trbv:0.00054,V198RF-ABGA01277803.1-trbv:0.02276)0.948:0.05568)0.270:0.02169,(((V161RF-AQIB01162313.1-trbv:0.01128,V36RF-JYKQ01029811.1-trbv:0.00055)0.000:0.00054,(V84RF-AQIA01048528.1-trbv:0.00055,V157RF-AHZZ01067653.1-trbv:0.01132)0.973:0.03470)0.941:0.05050,(V77RF-CABD02352499.1-trbv:0.05702,(V135RF-AJFE01070463.1-trbv:0.01132,V16RF-AACZ03053981.1-trbv:0.01196)0.907:0.04037)0.834:0.05019)0.671:0.00697)0.909:0.08014,(((V152RF-AHZZ01067652.1-trbv:0.0,V90RF-JYKQ01131091.1-trbv:0.0,V91RF-JYKQ01131092.1-trbv:0.0):0.06277,((((V173RF-AQIB01162319.1-trbv:0.01145,(V171RF-AQIB01162319.1-trbv:0.00055,(V155RF-AHZZ01067652.1-trbv:0.02274,V94RF-JYKQ01131093.1-trbv:0.02248)0.946:0.04520)0.667:0.03423)0.893:0.03063,((V97RF-AQIA01048530.1-trbv:0.00055,V139RF-AHZZ01067651.1-trbv:0.02309)0.932:0.04937,(V87RF-JYKQ01131090.1-trbv:0.02337,(V149RF-AHZZ01067652.1-trbv:0.02363,((V92RF-AQIA01048530.1-trbv:0.02855,((V152RF-AJFE01070463.1-trbv:0.0,V32RF-AACZ03053988.1-trbv:0.0):0.03928,V16RF-ADFV01062075.1-trbv:0.09486)0.945:0.07685)0.766:0.01954,V168RF-AQIB01162317.1-trbv:0.02341)0.791:0.01253)0.306:0.01289)0.986:0.09878)0.766:0.01328)0.772:0.01187,((V100RF-AQIA01048531.1-trbv:0.03977,((((V142RF-AHZZ01067651.1-trbv:0.04609,V97RF-JYKQ01131094.1-trbv:0.00055)0.870:0.02262,(V177RF-AQIB01162320.1-trbv:0.01159,V99RF-JYKQ01131095.1-trbv:0.01161)0.779:0.01176)0.923:0.03434,V143RF-AHZZ01067651.1-trbv:0.00055)0.782:0.01108,V101RF-AQIA01048532.1-trbv:0.00054)0.730:0.01803)0.763:0.01110,(V152RF-JABR01088214.1-trbv:0.07560,(((V149RF-AJFE01070463.1-trbv:0.00055,((V143RF-AJFE01070463.1-trbv:0.00055,V98RF-ABGA01301086.1-trbv:0.01145)0.848:0.01157,V29RF-AACZ03053988.1-trbv:0.00055)0.861:0.01146)0.717:0.01142,(V25RF-AACZ03053984.1-trbv:0.01140,V22RF-ADFV01062076.1-trbv:0.04744)0.015:0.00055)0.947:0.00055,((V84RF-CABD02352508.1-trbv:0.00054,V90RF-CABD02352511.1-trbv:0.05860)0.750:0.01094,((V146RF-AJFE01070463.1-trbv:0.05524,V87RF-CABD02352509.1-trbv:0.02085)0.908:0.04110,((V23RF-AACZ03053983.1-trbv:0.00054,(V17RF-ADFV01062075.1-trbv:0.08230,(V141RF-AJFE01070463.1-trbv:0.00054,V83RF-CABD02352503.1-trbv:0.01114)0.000:0.00054)0.473:0.03395)0.983:0.06061,(V180RF-AQIB01162320.1-trbv:0.04821,(V144RF-JABR01088213.1-trbv:0.09667,(V146RF-AHZZ01067651.1-trbv:0.02477,V102RF-JYKQ01131101.1-trbv:0.00055)0.945:0.04893)0.724:0.01170)0.929:0.03526)0.746:0.01197)0.873:0.02378)0.645:0.03599)0.840:0.02480)0.778:0.01686)0.885:0.02344)0.490:0.01305,V150RF-JABR01088214.1-trbv:0.08315)0.736:0.00935)0.862:0.03986,(V15RF-AGCE01062004.1-trbv:0.0,V16RF-AGCE01062006.1-trbv:0.0):0.12344)0.918:0.08070)0.916:0.07995)0.706:0.01454)0.981:0.17051)0.716:0.03429)0.932:0.27057,(((V24RF-AGCE01062011.1-trbv:0.04750,(V63RF-JABR01092448.1-trbv:0.04559,((V125RF-AJFE01070460.1-trbv:0.0,V42RF-AACZ03053991.1-trbv:0.0):0.02256,V101RF-CABD02352525.1-trbv:0.00053)0.545:0.03789)0.930:0.08707)0.996:0.31069,((V103RF-JZKE01294668.1-trbv:0.22678,(V62RF-JABR01092448.1-trbv:0.04409,((V188RF-AQIB01162320.1-trbv:0.01108,(V133RF-AHZZ01067649.1-trbv:0.00055,V109RF-JYKQ01131102.1-trbv:0.01096)0.888:0.02222)0.832:0.02197,(V26RF-ADFV01062079.1-trbv:0.03301,((V131RF-AJFE01070461.1-trbv:0.0,V41RF-AACZ03053991.1-trbv:0.0):0.02185,V39RF-ABGA01091249.1-trbv:0.01102)0.897:0.02227)0.736:0.01142)0.836:0.02860)0.965:0.14674)0.816:0.11810,((V136RF-ABDC01560090.1-trbv:0.13152,(V26RF-AGCE01062012.1-trbv:0.14043,(((V74RF-AJFE01104359.1-trbv:0.0,V51RF-AACZ03066999.1-trbv:0.0):0.02077,V109RF-CABD02377004.1-trbv:0.00053)0.966:0.06361,((((V115RF-AQIA01048536.1-trbv:0.02133,((V190RF-AQIB01162321.1-trbv:0.01062,V112RF-JYKQ01131104.1-trbv:0.02155)0.000:0.00055,V135RF-AHZZ01067649.1-trbv:0.01068)0.783:0.01066)0.790:0.01050,V64RF-JABR01092448.1-trbv:0.02152)0.916:0.03202,(V103RF-CABD02352526.1-trbv:0.01061,(V127RF-AJFE01070460.1-trbv:0.01076,V44RF-AACZ03053992.1-trbv:0.01066)0.791:0.01066)0.901:0.02151)0.748:0.01231,V27RF-ADFV01062081.1-trbv:0.00899)0.749:0.02490)0.835:0.02833)0.874:0.06654)0.988:0.21528,(V131RF-ABDC01473376.1-trbv:0.28112,((V104RF-CABD02352526.1-trbv:0.01083,((V128RF-AJFE01070460.1-trbv:0.01079,V45RF-AACZ03053992.1-trbv:0.00055)0.855:0.01080,V43RF-ABGA01091257.1-trbv:0.03256)0.000:0.00054)0.739:0.01663,((V65RF-JABR01092448.1-trbv:0.01073,(V191RF-AQIB01162321.1-trbv:0.00055,(V116RF-AQIA01048536.1-trbv:0.00055,(V113RF-JYKQ01131105.1-trbv:0.01025,V136RF-AHZZ01067649.1-trbv:0.01027)0.792:0.01016)0.929:0.02038)0.890:0.02183)0.897:0.03050,(V134RF-ABGA01047585.1-trbv:0.02866,V110RF-CABD02377004.1-trbv:0.02962)0.959:0.05805)0.142:0.01926)0.978:0.16561)0.966:0.16697)0.506:0.09484)0.970:0.23395)0.929:0.13734,((((V137RF-AJFE01070463.1-trbv:0.00055,V19RF-AACZ03053981.1-trbv:0.01100)0.937:0.06886,(((V132RF-AJFE01070462.1-trbv:0.0,V36RF-AACZ03053989.1-trbv:0.0):0.01111,(V95RF-CABD02352514.1-trbv:0.0,V21RF-ADFV01062075.1-trbv:0.0):0.00055)0.988:0.13165,(V81RF-ABGA01276890.1-trbv:0.00055,V20RF-AACZ03053983.1-trbv:0.04500)0.932:0.06558)0.813:0.03775)0.999:0.27537,((V12RF-AGCE01062000.1-trbv:0.21776,((V10RF-AGCE01062000.1-trbv:0.21010,V118RF-ABDC01368596.1-trbv:0.11560)0.823:0.05345,((V20RF-AGCE01062009.1-trbv:0.14585,(((((V108RF-AQIA01048532.1-trbv:0.00053,V128RF-AHZZ01067649.1-trbv:0.03287)0.822:0.01089,V58RF-JABR01092448.1-trbv:0.01087)0.939:0.00054,(((V129RF-AHZZ01067649.1-trbv:0.03383,V105RF-JYKQ01131102.1-trbv:0.03477)0.876:0.02243,V184RF-AQIB01162320.1-trbv:0.04540)0.699:0.00053,V109RF-AQIA01048532.1-trbv:0.00054)0.732:0.02242)0.910:0.02160,V183RF-AQIB01162320.1-trbv:0.00054)0.892:0.02188,(((V133RF-AJFE01070462.1-trbv:0.0,V37RF-AACZ03053989.1-trbv:0.0):0.00055,(V34RF-ABGA01091248.1-trbv:0.01317,V35RF-ABGA01091248.1-trbv:0.02377)0.986:0.07961)0.486:0.01076,(V96RF-CABD02352514.1-trbv:0.00055,V97RF-CABD02352515.1-trbv:0.01074)0.000:0.00055)0.946:0.03467)0.845:0.00054)0.711:0.02216,(V147RF-JABR01088213.1-trbv:0.05583,(V185RF-AQIB01162320.1-trbv:0.01309,((V106RF-JYKQ01131102.1-trbv:0.01091,((V110RF-AQIA01048532.1-trbv:0.0,V130RF-AHZZ01067649.1-trbv:0.0):0.01136,V59RF-JABR01092448.1-trbv:0.01133)1.000:0.00055)0.411:0.02374,((V129RF-AJFE01070461.1-trbv:0.0,V38RF-AACZ03053991.1-trbv:0.0):0.03451,V36RF-ABGA01091249.1-trbv:0.00061)0.907:0.03452)0.964:0.08207)0.992:0.12014)0.879:0.03474)0.940:0.08436)0.857:0.07560)0.966:0.13114,((V105RF-JZKE01294669.1-trbv:0.18344,V108RF-JZKE01294672.1-trbv:0.06848)0.884:0.06272,(((V17RF-AGCE01062008.1-trbv:0.05782,(((V192RF-ABGA01259417.1-trbv:0.01177,(V125RF-AHZZ01067649.1-trbv:0.01084,(V105RF-AQIA01048532.1-trbv:0.00055,V103RF-JYKQ01131101.1-trbv:0.02192)0.000:0.00054)1.000:0.14174)0.866:0.02310,((V91RF-CABD02352511.1-trbv:0.0,V92RF-CABD02352512.1-trbv:0.0):0.01005,(V153RF-AJFE01070463.1-trbv:0.00055,V33RF-AACZ03053988.1-trbv:0.01106)0.963:0.03438)0.916:0.02411)0.799:0.01859,V18RF-ADFV01062075.1-trbv:0.05932)0.954:0.05954)0.949:0.07048,((((V174RF-AQIB01162319.1-trbv:0.06686,(V149RF-JABR01088214.1-trbv:0.06345,(V99RF-AQIA01048531.1-trbv:0.02317,V96RF-JYKQ01131094.1-trbv:0.01150)0.892:0.03079)0.396:0.01190)0.735:0.01416,(V86RF-JYKQ01131090.1-trbv:0.01945,(V91RF-AQIA01048530.1-trbv:0.03107,V148RF-AHZZ01067652.1-trbv:0.01521)0.291:0.01160)0.898:0.02873)0.781:0.01215,V94RF-ABGA01301078.1-trbv:0.06052)0.839:0.02775,(((V151RF-AHZZ01067652.1-trbv:0.00055,(V169RF-AQIB01162317.1-trbv:0.03458,V89RF-JYKQ01131090.1-trbv:0.01128)0.934:0.03456)0.920:0.04423,(V100RF-ABGA01301086.1-trbv:0.07101,(V151RF-AJFE01070463.1-trbv:0.01117,V31RF-AACZ03053988.1-trbv:0.00055)0.762:0.01086)0.933:0.03658)0.742:0.01148,(((V95RF-AQIA01048530.1-trbv:0.01568,V154RF-AHZZ01067652.1-trbv:0.04843)0.941:0.04158,(V165RF-JABR01088215.1-trbv:0.06377,((V96RF-AQIA01048530.1-trbv:0.03288,V138RF-AHZZ01067651.1-trbv:0.01384)0.264:0.02383,(((V89RF-CABD02352511.1-trbv:0.00055,(V148RF-AJFE01070463.1-trbv:0.01118,V28RF-AACZ03053988.1-trbv:0.01101)0.000:0.00054)0.867:0.02282,(V145RF-AJFE01070463.1-trbv:0.01125,V26RF-AACZ03053986.1-trbv:0.01139)0.746:0.01139)0.929:0.03618,(V0RF-JABR01013263.1-trbv:0.07120,((V101RF-JYKQ01131098.1-trbv:0.02301,V145RF-AHZZ01067651.1-trbv:0.00055)0.879:0.01894,(V103RF-AQIA01048532.1-trbv:0.00055,V179RF-AQIB01162320.1-trbv:0.03505)0.678:0.00458)0.909:0.03409)0.739:0.01059)0.890:0.03694)0.648:0.02682)0.177:0.00054)0.849:0.02816,(((V140RF-AJFE01070463.1-trbv:0.0,V82RF-CABD02352502.1-trbv:0.0,V22RF-AACZ03053983.1-trbv:0.0):0.05584,V63RF-ABGA01129113.1-trbv:0.05004)0.981:0.09728,V15RF-ADFV01062075.1-trbv:0.05728)0.750:0.02704)0.907:0.03669)0.726:0.00886)0.947:0.07345)0.840:0.07746,(((V76RF-CABD02352499.1-trbv:0.00054,(V134RF-AJFE01070463.1-trbv:0.01165,V15RF-AACZ03053981.1-trbv:0.00054)0.774:0.02293)0.910:0.06436,(V83RF-AQIA01048527.1-trbv:0.01149,((V160RF-AQIB01162313.1-trbv:0.05978,V35RF-JYKQ01029811.1-trbv:0.02334)0.772:0.01147,(V156RF-AHZZ01067653.1-trbv:0.04481,V205RF-JABR01184607.1-trbv:0.08631)0.652:0.00207)0.775:0.01140)0.985:0.09755)0.848:0.04356,(((V82RF-AQIA01048527.1-trbv:0.0,V167RF-AHZZ01067655.1-trbv:0.0,V34RF-JYKQ01029809.1-trbv:0.0):0.01722,(V171RF-JABR01088216.1-trbv:0.04073,V159RF-AQIB01162312.1-trbv:0.05964)0.769:0.00053)0.925:0.06555,(V200RF-ABGA01277808.1-trbv:0.06698,(V74RF-CABD02352494.1-trbv:0.08070,V13RF-AACZ03053979.1-trbv:0.00054)0.248:0.01341)0.865:0.03614)0.103:0.03334)0.971:0.13674)0.734:0.04191)0.943:0.11343)0.725:0.05238)0.846:0.08450,(((V131RF-AHZZ01067649.1-trbv:0.00053,V107RF-JYKQ01131102.1-trbv:0.03378)0.728:0.02177,((V130RF-AJFE01070461.1-trbv:0.00094,(V99RF-CABD02352520.1-trbv:0.00055,V39RF-AACZ03053991.1-trbv:0.02141)0.857:0.02122)0.976:0.08556,V21RF-AGCE01062009.1-trbv:0.11275)0.586:0.01457)0.996:0.28711,((((V74RF-JABR01095742.1-trbv:0.02228,(V72RF-AQIA01048525.1-trbv:0.03273,(V172RF-AHZZ01067659.1-trbv:0.0,V25RF-JYKQ01029807.1-trbv:0.0):0.00054)0.982:0.06855)0.746:0.01085,(V32RF-AJFE01039607.1-trbv:0.01061,(V0RF-ADFV01062069.1-trbv:0.06633,V4RF-AACZ03053974.1-trbv:0.00055)0.550:0.01109)0.960:0.04330)0.701:0.00054,V27RF-JYKQ01029807.1-trbv:0.04405)0.975:0.16787,(V113RF-JZKE01294700.1-trbv:0.13552,V111RF-ABDC01281097.1-trbv:0.07956)0.827:0.04423)0.998:0.34835)0.715:0.07632)0.880:0.11809)0.979:0.26611)0.948:0.24460,((((V41RF-ABGA01091252.1-trbv:0.01159,((V126RF-AJFE01070460.1-trbv:0.0,V102RF-CABD02352526.1-trbv:0.0):0.00055,V43RF-AACZ03053991.1-trbv:0.01123)0.753:0.01111)0.775:0.02050,(V134RF-AHZZ01067649.1-trbv:0.02228,(V114RF-AQIA01048536.1-trbv:0.02231,(V189RF-AQIB01162321.1-trbv:0.02264,V111RF-JYKQ01131104.1-trbv:0.02217)0.788:0.01113)0.000:0.00054)0.703:0.01312)0.997:0.43588,(((V99RF-JZKE01294660.1-trbv:0.29810,((((V161RF-ABGA01225869.1-trbv:0.02288,V48RF-AACZ03053994.1-trbv:0.03407)0.527:0.00055,(V107RF-CABD02352531.1-trbv:0.01113,V30RF-ADFV01062084.1-trbv:0.01150)0.821:0.01131)0.799:0.01085,((V121RF-AHZZ01067647.1-trbv:0.01104,V116RF-JYKQ01131110.1-trbv:0.03585)0.778:0.01325,(V194RF-AQIB01162321.1-trbv:0.02277,(V119RF-AQIA01048536.1-trbv:0.01088,V68RF-JABR01092448.1-trbv:0.04662)0.765:0.01164)0.792:0.01022)0.664:0.02363)0.843:0.03598,V28RF-AGCE01062014.1-trbv:0.02438)0.914:0.11259)0.952:0.19504,((V0RF-JZKE01005121.1-trbv:0.09060,V2RF-ABDC01116809.1-trbv:0.14280)0.909:0.10519,(V29RF-AGCE01062014.1-trbv:0.14166,((V195RF-AQIB01162321.1-trbv:0.02143,(V120RF-AQIA01048536.1-trbv:0.00055,V117RF-JYKQ01131110.1-trbv:0.01067)0.362:0.00055)0.901:0.01043,(V122RF-AHZZ01067647.1-trbv:0.00054,(V69RF-JABR01092448.1-trbv:0.02116,((V49RF-AACZ03053994.1-trbv:0.00055,(V123RF-AJFE01070459.1-trbv:0.01103,V108RF-CABD02352532.1-trbv:0.01118)0.812:0.01133)0.783:0.01213,(V31RF-ADFV01062084.1-trbv:0.01133,(V77RF-ABGA01224584.1-trbv:0.01154,V162RF-ABGA01225869.1-trbv:0.00055)0.935:0.03503)0.785:0.01174)0.967:0.04753)0.756:0.01064)1.000:0.00054)0.913:0.08089)0.930:0.10185)0.994:0.22823)0.689:0.04239,((((V69RF-JZKE01196378.1-trbv:0.08940,V101RF-JZKE01294668.1-trbv:0.11129)0.806:0.02937,(V128RF-ABDC01455982.1-trbv:0.23187,((V19RF-AGCE01062009.1-trbv:0.12587,(((V104RF-JYKQ01131101.1-trbv:0.01149,(V106RF-AQIA01048532.1-trbv:0.01159,V126RF-AHZZ01067649.1-trbv:0.01148)0.911:0.01140)0.994:0.00054,(V181RF-AQIB01162320.1-trbv:0.01158,V146RF-JABR01088213.1-trbv:0.02331)0.801:0.01157)0.890:0.03447,(V32RF-ABGA01091248.1-trbv:0.04676,(V20RF-ADFV01062075.1-trbv:0.04843,(V94RF-CABD02352513.1-trbv:0.01167,V35RF-AACZ03053988.1-trbv:0.02345)0.878:0.02392)0.815:0.00061)0.404:0.01289)0.875:0.03813)0.923:0.06870,((V9RF-AGCE01061998.1-trbv:0.08342,V11RF-AGCE01062000.1-trbv:0.12620)0.572:0.00211,((V161RF-AHZZ01067653.1-trbv:0.00055,V83RF-JYKQ01131090.1-trbv:0.02227)0.977:0.10887,(V14RF-ADFV01062075.1-trbv:0.05305,(V86RF-AQIA01048529.1-trbv:0.03378,V163RF-AQIB01162314.1-trbv:0.00054)0.859:0.01722)0.800:0.05995)0.127:0.06448)0.946:0.08177)0.769:0.03418)0.850:0.04443)0.975:0.15018,((V199RF-ABGA01277806.1-trbv:0.04234,((V158RF-AJFE01070464.1-trbv:0.0,V14RF-AACZ03053981.1-trbv:0.0):0.00053,V75RF-CABD02352498.1-trbv:0.02319)0.740:0.01660)0.999:0.27448,(V119RF-ABDC01368601.1-trbv:0.24244,(((V90RF-AQIA01048530.1-trbv:0.01156,(V85RF-JYKQ01131090.1-trbv:0.01189,(V166RF-AQIB01162317.1-trbv:0.04983,V147RF-AHZZ01067652.1-trbv:0.00055)0.000:0.00054)0.881:0.02490)0.890:0.02380,((V0RF-AGCE01061995.1-trbv:0.04266,V4RF-AGCE01061995.1-trbv:0.05456)0.932:0.04393,((V170RF-JABR01088216.1-trbv:0.08417,V11RF-ADFV01062071.1-trbv:0.03486)0.191:0.00055,((V204RF-ABGA01277810.1-trbv:0.06193,((V203RF-ABGA01277809.1-trbv:0.03458,((V157RF-AJFE01070464.1-trbv:0.0,V12RF-AACZ03053977.1-trbv:0.0):0.02441,V70RF-CABD02352488.1-trbv:0.01186)0.837:0.02835)0.954:0.05390,V207RF-ABGA01277815.1-trbv:0.05757)0.810:0.02237)0.748:0.01210,((V205RF-ABGA01277810.1-trbv:0.08512,((V7RF-ADFV01062069.1-trbv:0.00055,((V35RF-AJFE01039608.1-trbv:0.0,V7RF-AACZ03053974.1-trbv:0.0):0.00054,V69RF-CABD02352482.1-trbv:0.04603)0.974:0.04572)0.593:0.02249,(V8RF-ADFV01062071.1-trbv:0.06768,(V167RF-JABR01088216.1-trbv:0.01564,(V155RF-AQIB01162312.1-trbv:0.02216,(V78RF-AQIA01048526.1-trbv:0.01110,(V171RF-AHZZ01067656.1-trbv:0.01112,V30RF-JYKQ01029809.1-trbv:0.01111)0.802:0.01105)0.785:0.01124)0.919:0.05267)0.990:0.09814)0.298:0.01992)0.898:0.00054)0.737:0.01166,(((V166RF-AHZZ01067655.1-trbv:0.0,V33RF-JYKQ01029809.1-trbv:0.0):0.01297,(V158RF-AQIB01162312.1-trbv:0.08182,(V81RF-AQIA01048526.1-trbv:0.00055,V165RF-AHZZ01067655.1-trbv:0.02307)0.660:0.00217)0.977:0.07232)0.976:0.08275,(V73RF-CABD02352493.1-trbv:0.04810,(V159RF-AJFE01070465.1-trbv:0.00055,V9RF-AACZ03053976.1-trbv:0.01164)0.868:0.02345)0.831:0.02238)0.784:0.01564)0.000:0.00054)0.632:0.01142)0.982:0.05793)0.865:0.00054)0.760:0.01052,((((((V170RF-AQIB01162318.1-trbv:0.00055,(V92RF-JYKQ01131092.1-trbv:0.06301,(V94RF-AQIA01048530.1-trbv:0.02428,V153RF-AHZZ01067652.1-trbv:0.03825)0.743:0.01474)0.876:0.03859)0.933:0.04107,(V153RF-JABR01088214.1-trbv:0.04722,((V144RF-AHZZ01067651.1-trbv:0.02418,V178RF-AQIB01162320.1-trbv:0.03647)0.286:0.01200,(V100RF-JYKQ01131096.1-trbv:0.00054,V102RF-AQIA01048532.1-trbv:0.04920)0.883:0.00054)0.850:0.02415)0.964:0.06299)0.856:0.02235,(V160RF-ABGA01223433.1-trbv:0.02368,(V147RF-AJFE01070463.1-trbv:0.06421,(V88RF-CABD02352510.1-trbv:0.03645,V27RF-AACZ03053987.1-trbv:0.00783)0.974:0.00348)0.970:0.06140)0.859:0.02254)0.516:0.01172,(V99RF-ABGA01301086.1-trbv:0.05858,(V150RF-AJFE01070463.1-trbv:0.0,V30RF-AACZ03053988.1-trbv:0.0):0.07225)0.795:0.00055)0.886:0.02206,((V81RF-CABD02352501.1-trbv:0.01151,(V139RF-AJFE01070463.1-trbv:0.02377,V21RF-AACZ03053983.1-trbv:0.01235)0.924:0.02389)1.000:0.00054,(V160RF-JABR01088215.1-trbv:0.03554,(V97RF-ABGA01301083.1-trbv:0.09086,(V142RF-AJFE01070463.1-trbv:0.00055,V24RF-AACZ03053983.1-trbv:0.01166)0.729:0.01149)0.975:0.07315)0.757:0.00054)0.731:0.00054)0.759:0.01126,(((V98RF-JYKQ01131094.1-trbv:0.02545,V151RF-JABR01088214.1-trbv:0.02368)0.858:0.02348,(V140RF-AHZZ01067651.1-trbv:0.0,V95RF-JYKQ01131093.1-trbv:0.0):0.08942)0.846:0.02513,(V98RF-AQIA01048530.1-trbv:0.05103,V13RF-AGCE01062002.1-trbv:0.17573)0.742:0.01125)0.858:0.02241)0.893:0.02253)0.942:0.07666)0.226:0.02236)0.934:0.15406)0.238:0.13062,((((V192RF-AQIB01162321.1-trbv:0.02325,(V66RF-JABR01092448.1-trbv:0.02274,(V137RF-AHZZ01067649.1-trbv:0.04537,(V117RF-AQIA01048536.1-trbv:0.01108,V114RF-JYKQ01131107.1-trbv:0.00055)0.997:0.00053)0.788:0.01098)0.771:0.01112)0.913:0.03479,((V120RF-AJFE01070459.1-trbv:0.0,V46RF-AACZ03053992.1-trbv:0.0):0.01142,V105RF-CABD02352529.1-trbv:0.00055)0.965:0.00055)0.400:0.00233,V44RF-ABGA01091257.1-trbv:0.03333)0.996:0.30293,((V226RF-ABGA01349559.1-trbv:0.03796,((V76RF-AJFE01104359.1-trbv:0.0,V53RF-AACZ03067000.1-trbv:0.0):0.00054,V111RF-CABD02377005.1-trbv:0.03547)0.281:0.02241)0.998:0.18341,((((V67RF-JABR01092448.1-trbv:0.00055,(V124RF-AHZZ01067648.1-trbv:0.00053,V115RF-JYKQ01131107.1-trbv:0.03393)0.854:0.01118)0.000:0.00054,V118RF-AQIA01048536.1-trbv:0.03421)0.000:0.00054,V193RF-AQIB01162321.1-trbv:0.01122)0.916:0.03490,(V45RF-ABGA01091260.1-trbv:0.00055,(V29RF-ADFV01062082.1-trbv:0.01125,(V121RF-AJFE01070459.1-trbv:0.00055,(V106RF-CABD02352529.1-trbv:0.01131,V47RF-AACZ03053992.1-trbv:0.01122)0.000:0.00055)0.000:0.00054)0.881:0.02257)0.908:0.03322)0.705:0.01235)1.000:0.43094)0.143:0.10955)0.904:0.12984)0.848:0.09508)0.994:0.37633,((V64RF-ABDC01405197.1-trbv:0.14762,(V25RF-ADFV01062079.1-trbv:0.01300,(V38RF-ABGA01091249.1-trbv:0.01132,(V100RF-CABD02352520.1-trbv:0.02247,V40RF-AACZ03053991.1-trbv:0.03417)0.000:0.00054)0.836:0.02129)0.932:0.15419)0.998:0.50217,(((V110RF-JZKE01294690.1-trbv:0.06777,((V61RF-ABDC01399103.1-trbv:0.03709,((V98RF-ABDC01527872.1-trbv:0.02628,V112RF-ABDC01281097.1-trbv:0.04466)0.906:0.05074,V109RF-ABDC01281094.1-trbv:0.01842)0.163:0.03429)0.933:0.05091,V112RF-JZKE01294699.1-trbv:0.07923)0.822:0.02206)0.966:0.09641,(V149RF-AQIB01162311.1-trbv:0.04383,(((V72RF-JABR01095741.1-trbv:0.00999,V75RF-JABR01095742.1-trbv:0.04546)0.727:0.01002,(V237RF-AHZZ01107346.1-trbv:0.03010,(V70RF-AQIA01048525.1-trbv:0.00054,V23RF-JYKQ01029805.1-trbv:0.02187)0.941:0.02998)0.755:0.01008)0.893:0.02488,(((V1RF-AGCE01061995.1-trbv:0.02032,((V169RF-AHZZ01067656.1-trbv:0.01129,V9RF-ADFV01062071.1-trbv:0.08641)0.167:0.01009,(V75RF-AQIA01048525.1-trbv:0.00055,V152RF-AQIB01162312.1-trbv:0.04590)0.776:0.01204)0.909:0.03003)0.718:0.00657,((V155RF-AJFE01070464.1-trbv:0.0,V71RF-CABD02352491.1-trbv:0.0,V10RF-AACZ03053977.1-trbv:0.0):0.03965,V201RF-ABGA01277809.1-trbv:0.03119)0.882:0.03543)0.881:0.02092,(V4RF-ADFV01062069.1-trbv:0.06091,(V31RF-JYKQ01029809.1-trbv:0.00976,(V79RF-AQIA01048526.1-trbv:0.02997,(V156RF-AQIB01162312.1-trbv:0.03958,(V163RF-AHZZ01067655.1-trbv:0.00053,V168RF-JABR01088216.1-trbv:0.08152)0.000:0.00054)0.805:0.00055)0.816:0.03130)0.923:0.03395)0.726:0.00697)0.839:0.01772)0.571:0.02005)0.795:0.04283)0.878:0.13581,((((V215RF-ABGA01277831.1-trbv:0.04966,(V5RF-ADFV01062069.1-trbv:0.00986,(V210RF-ABGA01277827.1-trbv:0.02004,(V1RF-ADFV01062069.1-trbv:0.01980,(V67RF-CABD02352480.1-trbv:0.01970,(V5RF-AACZ03053974.1-trbv:0.01984,V33RF-AJFE01039607.1-trbv:0.00054)0.000:0.00055)0.842:0.00983)0.000:0.00055)0.893:0.02025)0.794:0.01025)0.866:0.02393,((V76RF-AQIA01048525.1-trbv:0.02227,(V170RF-AHZZ01067656.1-trbv:0.01092,((V150RF-AQIB01162312.1-trbv:0.0,V28RF-JYKQ01029807.1-trbv:0.0):0.02237,V153RF-AQIB01162312.1-trbv:0.00054)0.000:0.00055)0.843:0.01095)0.864:0.00055,(V73RF-JABR01095741.1-trbv:0.04450,(V71RF-AQIA01048525.1-trbv:0.04412,(V235RF-AHZZ01107345.1-trbv:0.04371,V24RF-JYKQ01029805.1-trbv:0.00055)0.703:0.02196)0.858:0.02215)0.846:0.03539)0.753:0.01978)0.961:0.08564,((V164RF-AHZZ01067655.1-trbv:0.00054,V32RF-JYKQ01029809.1-trbv:0.01997)0.902:0.02825,((V80RF-AQIA01048526.1-trbv:0.00055,(V2RF-AGCE01061995.1-trbv:0.12713,((V36RF-AJFE01039609.1-trbv:0.0,V8RF-AACZ03053975.1-trbv:0.0):0.00054,((V206RF-ABGA01277811.1-trbv:0.02138,V10RF-ADFV01062071.1-trbv:0.02250)0.919:0.03635,((V156RF-AJFE01070464.1-trbv:0.0,V11RF-AACZ03053977.1-trbv:0.0):0.01116,V72RF-CABD02352492.1-trbv:0.00055)0.917:0.03550)0.079:0.01896)0.947:0.05292)0.881:0.03386)0.905:0.02010,V157RF-AQIB01162312.1-trbv:0.00054)0.792:0.01386)0.876:0.04277)0.914:0.07315,((V107RF-ABDC01281089.1-trbv:0.23035,V110RF-ABDC01281096.1-trbv:0.06201)0.529:0.02771,V111RF-JZKE01294692.1-trbv:0.06941)0.879:0.06578)0.993:0.28232)0.981:0.39718)0.854:0.14658)0.134:0.09185)0.841:0.28636)0.902:0.29578)0.255:0.06495)0.974:0.37022,(((((((V18RF-ABDC01318810.1-iglv:0.04775,(V73RF-ABDC01422153.1-iglv:0.0,V84RF-ABDC01466438.1-iglv:0.0):0.02967)0.739:0.01200,(V19RF-ABDC01318812.1-iglv:0.06723,V71RF-JZKE01238797.1-iglv:0.12645)0.817:0.03127)0.398:0.01492,(V31RF-ABDC01352111.1-iglv:0.07983,(V62RF-ABDC01399713.1-iglv:0.0,V93RF-ABDC01498106.1-iglv:0.0):0.07793)0.773:0.03757)0.967:0.08777,((V107RF-AGCE01135277.1-iglv:0.12847,((((V186RF-AHZZ01089506.1-iglv:0.03605,((V182RF-ABGA01252243.1-iglv:0.01074,V46RF-ADFV01126741.1-iglv:0.07346)0.902:0.03556,((V103RF-AJFE01020634.1-iglv:0.0,V50RF-CABD02231359.1-iglv:0.0):0.00055,V163RF-AACZ03176953.1-iglv:0.01027)0.883:0.02825)0.813:0.01764)0.799:0.01830,V18RF-AQIA01007586.1-iglv:0.08545)0.644:0.02408,V239RF-JYKQ01126581.1-iglv:0.03005)0.812:0.05302,((V47RF-ADFV01126741.1-iglv:0.05309,((V97RF-AJFE01020628.1-iglv:0.02163,((V236RF-JYKQ01126580.1-iglv:0.03324,(V59RF-AQIB01146122.1-iglv:0.04206,V68RF-AQIB01146122.1-iglv:0.02292)0.662:0.01123)0.452:0.01180,(V188RF-AHZZ01089506.1-iglv:0.03131,V237RF-JYKQ01126580.1-iglv:0.01214)0.951:0.05039)0.761:0.01085)0.759:0.01098,(((V123RF-JABR01071860.1-iglv:0.05524,(V19RF-AQIA01007586.1-iglv:0.04694,(V67RF-AQIB01146122.1-iglv:0.03253,V240RF-JYKQ01126581.1-iglv:0.03272)0.755:0.01089)0.738:0.01104)0.924:0.04275,(V26RF-AQIA01007589.1-iglv:0.01052,V245RF-JYKQ01126589.1-iglv:0.01040)0.779:0.01051)0.770:0.01926,(V38RF-AHZZ01099973.1-iglv:0.01013,(V21RF-AQIA01007586.1-iglv:0.03295,(V124RF-JABR01071860.1-iglv:0.01067,V129RF-JABR01071862.1-iglv:0.03670)0.749:0.01196)0.880:0.02565)0.788:0.01104)0.878:0.00051)0.844:0.02385)0.913:0.04469,(V20RF-AQIA01007586.1-iglv:0.01117,V187RF-AHZZ01089506.1-iglv:0.00055)0.919:0.04917)0.090:0.04244)0.780:0.03164)0.214:0.03933,(V101RF-AGCE01112674.1-iglv:0.13886,(((V120RF-JABR01071859.1-iglv:0.01346,(((V70RF-AQIB01146123.1-iglv:0.03021,V234RF-JYKQ01126579.1-iglv:0.02512)0.810:0.01800,V190RF-AHZZ01089506.1-iglv:0.00989)0.777:0.00995,V15RF-AQIA01007584.1-iglv:0.00054)0.947:0.04896)0.985:0.08582,(((V165RF-AACZ03176953.1-iglv:0.01058,(V99RF-AJFE01020631.1-iglv:0.02066,(V53RF-CABD02231362.1-iglv:0.00054,V54RF-CABD02231364.1-iglv:0.02046)0.884:0.02082)0.741:0.01002)0.866:0.02100,((((V24RF-AQIA01007588.1-iglv:0.02065,V196RF-AHZZ01089508.1-iglv:0.00055)0.849:0.02203,(V62RF-AQIB01146122.1-iglv:0.05395,V247RF-JYKQ01126589.1-iglv:0.01136)0.331:0.01109)0.943:0.04231,(V180RF-ABGA01252241.1-iglv:0.03174,V183RF-ABGA01252243.1-iglv:0.01058)0.869:0.03043)0.778:0.01221,((V44RF-ADFV01126738.1-iglv:0.04055,(V48RF-ADFV01126742.1-iglv:0.01043,V129RF-ADFV01132918.1-iglv:0.03131)0.860:0.02030)0.748:0.01133,(V126RF-JABR01071861.1-iglv:0.03031,((V244RF-JYKQ01126586.1-iglv:0.02115,V25RF-AQIA01007588.1-iglv:0.01042)0.787:0.01026,((V78RF-JABR01189674.1-iglv:0.0,V128RF-JABR01071862.1-iglv:0.0):0.02078,V193RF-AHZZ01089507.1-iglv:0.01047)0.000:0.00054)0.995:0.07628)0.748:0.01120)0.843:0.02066)0.784:0.01077)0.762:0.01082,V131RF-JABR01071862.1-iglv:0.14528)0.770:0.01036)0.291:0.00053,(V184RF-AHZZ01089506.1-iglv:0.05199,(V242RF-JYKQ01126585.1-iglv:0.03089,((V65RF-AQIB01146122.1-iglv:0.06264,V4RF-JABR01016432.1-iglv:0.05317)0.901:0.00055,V23RF-AQIA01007587.1-iglv:0.01026)0.691:0.01018)0.938:0.00055)0.790:0.02014)0.560:0.05291)0.183:0.02921)0.812:0.03312)0.926:0.05988,((((V221RF-JYKQ01126545.1-iglv:0.00055,(V259RF-AHZZ01198550.1-iglv:0.00055,(V0RF-AQIA01007569.1-iglv:0.02037,V88RF-AQIB01146141.1-iglv:0.02029)0.778:0.01002)0.910:0.01084)0.996:0.12264,(V166RF-AACZ03176965.1-iglv:0.26611,(V24RF-JZKE01249956.1-iglv:0.02053,V26RF-JZKE01249957.1-iglv:0.00054)0.983:0.11795)0.629:0.02835)0.163:0.01599,((((((V231RF-JYKQ01126546.1-iglv:0.00054,(V173RF-ABGA01252219.1-iglv:0.03080,((V175RF-ABGA01252219.1-iglv:0.02062,V199RF-AACZ03177116.1-iglv:0.04365)0.273:0.02232,V174RF-ABGA01252219.1-iglv:0.01793)0.346:0.00054)0.964:0.04794)0.595:0.01080,(((V222RF-AHZZ01105198.1-iglv:0.00055,(V168RF-ABGA01252216.1-iglv:0.06850,((V9RF-AQIA01007576.1-iglv:0.02214,(V117RF-JABR01071856.1-iglv:0.02318,(V106RF-JABR01071855.1-iglv:0.01093,((V95RF-AJFE01017586.1-iglv:0.0,V208RF-AACZ03191230.1-iglv:0.0):0.00055,V123RF-AACZ03127139.1-iglv:0.02152)0.788:0.01512)0.880:0.02964)0.000:0.00054)0.000:0.00054,V50RF-ADFV01126756.1-iglv:0.04397)0.917:0.02164)0.873:0.00054)0.814:0.01826,(V107RF-JABR01071855.1-iglv:0.00054,V113RF-JABR01071856.1-iglv:0.03315)0.987:0.06435)0.740:0.01148,(((V94RF-AJFE01017584.1-iglv:0.01025,V125RF-AACZ03127139.1-iglv:0.01040)0.753:0.01041,(V64RF-CABD02231427.1-iglv:0.02089,V164RF-ABGA01252206.1-iglv:0.06396)0.912:0.03124)0.922:0.03180,(((V6RF-AQIA01007575.1-iglv:0.01093,V228RF-JYKQ01126546.1-iglv:0.05607)0.222:0.00054,V84RF-AQIB01146140.1-iglv:0.01038)0.812:0.01021,(((V266RF-AHZZ01198553.1-iglv:0.01023,V217RF-JYKQ01126545.1-iglv:0.01018)0.000:0.00053,(V5RF-AQIA01007574.1-iglv:0.00054,(V82RF-AQIB01146140.1-iglv:0.01337,(V258RF-AHZZ01198550.1-iglv:0.0,V220RF-JYKQ01126545.1-iglv:0.0):0.02171)0.789:0.01368)0.835:0.01401)0.119:0.02066,(V260RF-AHZZ01198551.1-iglv:0.07744,(V1RF-AQIA01007574.1-iglv:0.00055,V87RF-AQIB01146141.1-iglv:0.02161)0.780:0.00054)0.904:0.02381)0.989:0.00054)0.727:0.01034)0.141:0.00055)0.881:0.03032)0.279:0.00055,(V60RF-CABD02231419.1-iglv:0.03111,V86RF-AJFE01010827.1-iglv:0.05038)0.775:0.01265)0.714:0.01055,(V61RF-CABD02231421.1-iglv:0.04418,(V72RF-AQIB01146133.1-iglv:0.02222,(V229RF-AHZZ01105201.1-iglv:0.02079,(V223RF-JYKQ01126546.1-iglv:0.01096,(V35RF-AQIA01009600.1-iglv:0.01096,V76RF-AQIB01146136.1-iglv:0.03323)0.779:0.01106)0.868:0.01098)0.929:0.00054)0.878:0.02214)0.877:0.00055)0.873:0.02945,V109RF-JABR01071855.1-iglv:0.04514)0.589:0.00753,(((V80RF-AQIB01146138.1-iglv:0.01343,(V13RF-AQIA01007576.1-igkv:0.01027,V263RF-AHZZ01198553.1-igkv:0.00055)0.979:0.07533)0.912:0.03972,V224RF-AHZZ01105199.1-iglv:0.02700)0.738:0.01303,V37RF-AQIA01009608.1-iglv:0.03033)0.984:0.09155)0.827:0.02308)0.998:0.15588,((((V72RF-JZKE01238797.1-iglv:0.01146,(V19RF-JZKE01249944.1-iglv:0.02014,(V70RF-ABDC01418168.1-iglv:0.01958,V103RF-ABDC01570800.1-iglv:0.02275)0.993:0.10238)0.882:0.03703)0.774:0.01125,((V135RF-ABDC01540867.1-iglv:0.0,V139RF-ABDC01624510.1-iglv:0.0):0.03408,(V14RF-ABDC01296165.1-iglv:0.02156,(V33RF-ABDC01359388.1-iglv:0.0,V129RF-ABDC01465190.1-iglv:0.0):0.03134)0.878:0.02222)0.199:0.00951)0.737:0.00661,(((V21RF-ABDC01342328.1-iglv:0.04289,V126RF-ABDC01425625.1-iglv:0.02228)0.910:0.03853,(V68RF-ABDC01417539.1-iglv:0.05707,(V59RF-ABDC01398089.1-iglv:0.02529,V79RF-ABDC01442374.1-iglv:0.08622)0.378:0.01213)0.861:0.03449)0.863:0.03226,V73RF-JZKE01238799.1-iglv:0.00055)0.750:0.01120)0.850:0.03276,((((V75RF-JYKQ01062966.1-iglv:0.00055,V128RF-ADFV01132915.1-iglv:0.05183)0.446:0.02012,(V28RF-AQIA01007590.1-iglv:0.02098,V58RF-AQIB01146122.1-iglv:0.03184)0.761:0.01034)0.798:0.01709,((((V31RF-AQIA01007600.1-iglv:0.01689,(V29RF-AHZZ01097949.1-iglv:0.00993,V212RF-JYKQ01080923.1-iglv:0.00055)0.775:0.01474)0.786:0.01788,(V185RF-ABGA01252248.1-iglv:0.04019,V126RF-ADFV01132915.1-iglv:0.03409)0.835:0.02496)0.043:0.01237,V135RF-JABR01077601.1-iglv:0.04586)0.842:0.02071,V37RF-AHZZ01099970.1-iglv:0.00994)0.803:0.01838)0.957:0.05034,((V133RF-JABR01077601.1-iglv:0.01658,(V186RF-ABGA01252249.1-iglv:0.03948,V125RF-ADFV01132915.1-iglv:0.03937)0.415:0.02413)0.931:0.05267,(V49RF-CABD02231318.1-iglv:0.00054,(V185RF-AACZ03127313.1-iglv:0.00055,(V167RF-AACZ03176987.1-iglv:0.01025,V106RF-AJFE01022796.1-iglv:0.04201)0.147:0.00991)0.896:0.01995)0.860:0.02836)0.780:0.02757)0.871:0.03914)1.000:0.18889)0.702:0.00856)0.887:0.07717,(V184RF-ABGA01252248.1-iglv:0.39206,(((V99RF-AGCE01112648.1-iglv:0.12958,(((V12RF-AQIA01007576.1-iglv:0.02131,V79RF-AQIB01146137.1-iglv:0.01058)0.811:0.01179,(V59RF-CABD02231416.1-iglv:0.04243,(V172RF-ABGA01252219.1-iglv:0.04287,(V85RF-AJFE01010827.1-iglv:0.0,V119RF-AACZ03127131.1-iglv:0.0):0.02107)0.923:0.00055)0.874:0.01932)0.767:0.01072,(V262RF-AHZZ01198553.1-iglv:0.02881,V115RF-JABR01071856.1-iglv:0.05957)0.810:0.01936)0.293:0.02810)0.638:0.05439,((V23RF-JZKE01249956.1-igkv:0.11381,(V23RF-ABDC01347844.1-iglv:0.05709,(V25RF-JZKE01249957.1-iglv:0.06737,V24RF-ABDC01349227.1-iglv:0.07423)0.620:0.02566)0.784:0.00054)0.835:0.05538,((V22RF-JZKE01249955.1-iglv:0.02113,V28RF-JZKE01249958.1-iglv:0.00055)1.000:0.22454,(V22RF-ABDC01347843.1-iglv:0.11697,(V124RF-ABDC01418360.1-iglv:0.09136,(V82RF-ABDC01449636.1-iglv:0.03121,(V25RF-ABDC01349230.1-iglv:0.01053,V50RF-ABDC01384523.1-iglv:0.00054)0.752:0.01115)0.762:0.03329)0.987:0.11784)0.193:0.01923)0.751:0.02245)0.643:0.05347)0.970:0.13391,((((V91RF-AJFE01017581.1-iglv:0.0,V127RF-AACZ03127143.1-iglv:0.0):0.01132,V65RF-CABD02231431.1-iglv:0.01083)0.961:0.09222,((((V52RF-ADFV01126759.1-iglv:0.03678,(((V170RF-ABGA01252219.1-iglv:0.00054,V171RF-ABGA01252219.1-iglv:0.01012)0.988:0.05522,(((V169RF-ABGA01252218.1-iglv:0.03720,V166RF-ABGA01252210.1-iglv:0.10629)0.610:0.05590,(V62RF-CABD02231422.1-iglv:0.00993,V122RF-AACZ03127139.1-iglv:0.02047)0.752:0.01342)0.591:0.03788,(V118RF-AACZ03127131.1-iglv:0.01723,(V84RF-AJFE01010827.1-iglv:0.01224,V87RF-AJFE01010828.1-iglv:0.03074)0.768:0.03200)0.846:0.03707)0.298:0.00050)0.772:0.01564,((((V116RF-JABR01071856.1-iglv:0.04072,((V224RF-JYKQ01126546.1-iglv:0.04422,(V36RF-AQIA01009600.1-iglv:0.02105,V230RF-AHZZ01105201.1-iglv:0.02079)0.746:0.01095)0.852:0.02241,((V119RF-JABR01071856.1-iglv:0.00055,((V11RF-AQIA01007576.1-iglv:0.00770,V230RF-JYKQ01126546.1-iglv:0.05276)0.757:0.01236,((V78RF-AQIB01146137.1-iglv:0.0,V81RF-AQIB01146138.1-iglv:0.0):0.06931,V226RF-JYKQ01126546.1-iglv:0.01791)0.847:0.02193)0.921:0.02918)0.766:0.01436,V73RF-AQIB01146133.1-iglv:0.06208)0.127:0.02023)0.786:0.01391)0.751:0.00769,V226RF-AHZZ01105200.1-iglv:0.07255)0.163:0.00054,(V8RF-AQIA01007576.1-iglv:0.04276,V225RF-AHZZ01105199.1-iglv:0.02503)0.785:0.02195)0.881:0.03317,(V14RF-AQIA01007576.1-iglv:0.00053,V265RF-AHZZ01198553.1-iglv:0.03320)0.922:0.04293)0.906:0.03906)0.791:0.02113)0.715:0.03902,V53RF-ADFV01126759.1-iglv:0.06504)0.764:0.01460,(V98RF-AGCE01112648.1-iglv:0.04789,V100RF-AGCE01112652.1-iglv:0.07098)0.904:0.03992)0.931:0.04907,V29RF-JZKE01249959.1-iglv:0.06236)0.933:0.06158)0.790:0.03857,((V49RF-ADFV01126755.1-iglv:0.07705,(((V88RF-AJFE01010829.1-iglv:0.0,V116RF-AACZ03127129.1-iglv:0.0):0.01407,V56RF-CABD02231410.1-iglv:0.00852)0.932:0.04488,(((V77RF-AQIB01146137.1-iglv:0.02556,V118RF-JABR01071856.1-iglv:0.05262)0.881:0.05345,(V176RF-ABGA01252220.1-iglv:0.02275,V51RF-ADFV01126759.1-iglv:0.05747)0.922:0.05955)0.993:0.13377,(V228RF-AHZZ01105201.1-iglv:0.05255,V222RF-JYKQ01126546.1-iglv:0.03782)0.776:0.01140)0.752:0.01065)0.924:0.06112)0.676:0.01133,(((((V218RF-JYKQ01126545.1-iglv:0.00054,V261RF-AHZZ01198551.1-iglv:0.04406)0.684:0.00975,(V3RF-AQIA01007574.1-iglv:0.01129,(V85RF-AQIB01146141.1-iglv:0.01118,V108RF-JABR01071855.1-iglv:0.02116)0.876:0.02259)0.464:0.01109)0.762:0.01829,V54RF-ADFV01126760.1-iglv:0.05142)0.835:0.02884,(V63RF-CABD02231427.1-iglv:0.02168,((V93RF-AJFE01017584.1-iglv:0.0,V124RF-AACZ03127139.1-iglv:0.0):0.02097,V167RF-ABGA01252215.1-iglv:0.02159)0.766:0.01073)0.752:0.01005)0.972:0.06886,(V264RF-AHZZ01198553.1-iglv:0.05860,(V117RF-AACZ03127129.1-iglv:0.01038,(V120RF-AACZ03127135.1-iglv:0.01514,(V57RF-CABD02231415.1-iglv:0.02627,V178RF-ABGA01252221.1-iglv:0.06159)0.358:0.02135)0.800:0.01742)0.874:0.02180)0.764:0.01091)0.374:0.02721)0.966:0.10544)0.788:0.07131)0.957:0.15666)0.870:0.09991)0.463:0.06720,(((V137RF-JABR01077603.1-iglv:0.04245,(V112RF-AGCE01147939.1-iglv:0.07160,(V108RF-ABGA01335280.1-iglv:0.02931,((V108RF-AJFE01022798.1-iglv:0.0,V188RF-AACZ03127321.1-iglv:0.0):0.04310,V47RF-CABD02231299.1-iglv:0.00054)0.887:0.02491)0.879:0.03038)0.765:0.01565)0.512:0.00212,(V33RF-AQIA01007605.1-iglv:0.00054,((V27RF-AHZZ01097944.1-iglv:0.0,V81RF-JYKQ01114545.1-iglv:0.0):0.02120,(V6RF-JABR01043229.1-iglv:0.05624,V229RF-AQIB01146043.1-iglv:0.02090)0.754:0.01025)0.669:0.01044)0.756:0.01879)1.000:0.51861,((((((V98RF-AJFE01020628.1-iglv:0.11275,((V246RF-JYKQ01126589.1-iglv:0.02261,(((V52RF-CABD02231360.1-iglv:0.01037,((V102RF-AJFE01020632.1-iglv:0.02186,V179RF-ABGA01252241.1-iglv:0.06767)0.961:0.06716,V164RF-AACZ03176953.1-iglv:0.00053)0.925:0.03651)0.900:0.02281,(V101RF-AJFE01020631.1-iglv:0.03392,V43RF-ADFV01126738.1-iglv:0.05514)0.873:0.02251)0.773:0.01084,((((V45RF-ADFV01126740.1-iglv:0.01409,(((V16RF-AQIA01007585.1-iglv:0.02268,V189RF-AHZZ01089506.1-iglv:0.00055)0.863:0.01162,(V63RF-AQIB01146122.1-iglv:0.01115,(V125RF-JABR01071861.1-iglv:0.03400,(V192RF-AHZZ01089507.1-iglv:0.02362,V69RF-AQIB01146122.1-iglv:0.00055)0.000:0.00055)0.848:0.01127)0.000:0.00054)0.968:0.00054,((V216RF-JYKQ01098166.1-iglv:0.02227,V243RF-JYKQ01126586.1-iglv:0.00054)0.536:0.01110,(V127RF-JABR01071862.1-iglv:0.02293,V233RF-JYKQ01126579.1-iglv:0.00054)0.004:0.00054)0.866:0.01106)0.995:0.09215)0.951:0.06080,(V195RF-AHZZ01089508.1-iglv:0.03383,V3RF-JABR01016432.1-iglv:0.02236)0.818:0.01991)0.864:0.02278,((V27RF-AQIA01007589.1-iglv:0.00054,V61RF-AQIB01146122.1-iglv:0.06818)0.891:0.02198,V130RF-JABR01071862.1-iglv:0.02213)0.716:0.01090)0.778:0.01094,(((V17RF-AQIA01007586.1-iglv:0.01091,V66RF-AQIB01146122.1-iglv:0.01124)0.887:0.02217,V238RF-JYKQ01126581.1-iglv:0.00055)0.880:0.02262,V185RF-AHZZ01089506.1-iglv:0.01118)0.942:0.03348)0.793:0.01116)0.766:0.01022)0.863:0.02972,(V241RF-JYKQ01126585.1-iglv:0.01112,(V22RF-AQIA01007587.1-iglv:0.00055,V64RF-AQIB01146122.1-iglv:0.01108)0.000:0.00055)0.985:0.09042)0.225:0.01255)0.829:0.04385,V69RF-ABDC01418168.1-iglv:0.09437)0.901:0.03395,((V138RF-ABDC01582683.1-iglv:0.09835,V74RF-JZKE01238800.1-iglv:0.02089)0.547:0.00055,V17RF-JZKE01249933.1-iglv:0.03245)0.761:0.01312)0.061:0.01720,(V13RF-ABDC01296165.1-iglv:0.00055,(V15RF-ABDC01296166.1-iglv:0.00055,V102RF-ABDC01556235.1-iglv:0.01103)0.858:0.01072)0.962:0.06254)0.875:0.04841,(V14RF-JZKE01249931.1-iglv:0.05044,V60RF-ABDC01398089.1-iglv:0.11195)0.789:0.03306)0.912:0.16120,((V107RF-AJFE01022798.1-iglv:0.0,V187RF-AACZ03127321.1-iglv:0.0):0.13167,(V15RF-JZKE01249932.1-iglv:0.0,V16RF-JZKE01249932.1-iglv:0.0):0.18210)0.992:0.36386)0.976:0.29786)0.841:0.08717)0.897:0.20638)0.951:0.28129)0.141:0.04770,((((V150RF-ABGA01154384.1-igkv:0.02585,(V4RF-AHZZ01040804.1-igkv:0.04281,((V171RF-AACZ03015561.1-igkv:0.01045,(V25RF-AJFE01016082.1-igkv:0.02105,V153RF-CABD02196508.1-igkv:0.05374)0.000:0.00050)0.923:0.02108,(V87RF-JABR01032523.1-igkv:0.03198,(V232RF-AQIA01017139.1-igkv:0.01032,V55RF-AQIB01144282.1-igkv:0.04244)0.772:0.01063)0.778:0.01055)0.888:0.00054)0.789:0.02941)0.998:0.24109,(((V83RF-ABGA01285645.1-igkv:0.03625,V107RF-ABGA01321410.1-igkv:0.00053)0.787:0.02299,(V113RF-ABGA01356726.1-igkv:0.02649,(((((V79RF-JYKQ01079834.1-igkv:0.11208,(((V36RF-JABR01076263.1-igkv:0.04769,(V225RF-AQIA01017128.1-igkv:0.00054,(V49RF-AQIB01144274.1-igkv:0.02280,V61RF-AHZZ01109398.1-igkv:0.01148)0.784:0.01149)0.763:0.01132)0.868:0.03519,((((V222RF-AQIA01017126.1-igkv:0.01188,(V256RF-AHZZ01189922.1-igkv:0.00055,V210RF-JYKQ01076937.1-igkv:0.01161)0.884:0.02392)0.849:0.02242,V46RF-AQIB01144273.1-igkv:0.07277)0.976:0.08189,((((V75RF-AHZZ01169213.1-igkv:0.02307,V53RF-JYKQ01051985.1-igkv:0.04733)0.756:0.01193,V239RF-AHZZ01107395.1-igkv:0.02320)0.898:0.02613,V227RF-AQIA01017128.1-igkv:0.00953)0.782:0.01359,((V221RF-AHZZ01104243.1-igkv:0.05068,((V95RF-JABR01041956.1-igkv:0.06818,(V224RF-AQIB01144282.1-igkv:0.00055,(V82RF-AHZZ01040804.1-igkv:0.01137,(V249RF-JYKQ01187338.1-igkv:0.03431,V60RF-AQIA01017139.1-igkv:0.00054)0.000:0.00054)0.857:0.01140)0.842:0.03121)0.990:0.10720,((V38RF-AQIB01144265.1-igkv:0.0,V67RF-AHZZ01117754.1-igkv:0.0):0.00055,((V40RF-AQIB01144269.1-igkv:0.04735,(V215RF-AQIA01017122.1-igkv:0.02421,V68RF-AHZZ01117754.1-igkv:0.01182)0.754:0.01117)0.997:0.12967,(((V231RF-AQIA01017135.1-igkv:0.04726,V260RF-AQIA01075132.1-igkv:0.01173)0.750:0.01132,(V31RF-JABR01076261.1-igkv:0.04548,(V43RF-AQIB01144273.1-igkv:0.05149,(V234RF-AHZZ01106331.1-igkv:0.00055,(V219RF-AQIA01017123.1-igkv:0.03582,V141RF-JYKQ01005004.1-igkv:0.00054)0.879:0.01141)0.754:0.01911)0.845:0.04685)0.887:0.03794)0.787:0.01123,(V142RF-JYKQ01005007.1-igkv:0.00055,V38RF-JABR01076263.1-igkv:0.02282)0.913:0.02291)0.000:0.00055)0.838:0.01220)0.330:0.00053)0.872:0.03818)0.483:0.01817,((((V38RF-ADFV01106193.1-igkv:0.09717,(V129RF-ABGA01394066.1-igkv:0.07175,(V18RF-AJFE01012236.1-igkv:0.02334,V139RF-AACZ03151855.1-igkv:0.00054)0.774:0.01703)0.765:0.01955)0.892:0.03837,((V207RF-AQIA01017118.1-igkv:0.00055,V153RF-JYKQ01005032.1-igkv:0.02199)0.916:0.02195,((V26RF-JABR01076261.1-igkv:0.03518,V34RF-ADFV01106193.1-igkv:0.07532)0.742:0.00964,(V42RF-AHZZ01104241.1-igkv:0.02186,V31RF-AQIB01144264.1-igkv:0.03528)0.910:0.00054)0.789:0.01114)0.761:0.01140)0.865:0.02317,(V147RF-JYKQ01005018.1-igkv:0.0,V149RF-JYKQ01005019.1-igkv:0.0):0.02361)0.771:0.01155,V213RF-AQIA01017120.1-igkv:0.00055)0.801:0.01707)0.791:0.01588)0.768:0.01206)0.748:0.01200,(V51RF-AQIB01144276.1-igkv:0.01131,(V73RF-AHZZ01143621.1-igkv:0.0,V244RF-AHZZ01111138.1-igkv:0.0,V247RF-AHZZ01111367.1-igkv:0.0):0.02372)0.877:0.03274)0.653:0.00641)0.726:0.02001,(V54RF-AQIB01144282.1-igkv:0.03988,(V254RF-AHZZ01185532.1-igkv:0.00055,V123RF-JYKQ01187326.1-igkv:0.01188)0.867:0.03275)0.979:0.09100)0.759:0.02118)0.768:0.01487,(V173RF-AACZ03015562.1-igkv:0.07174,((V217RF-ABGA01315458.1-igkv:0.00054,V86RF-ABGA01285651.1-igkv:0.04842)0.766:0.01226,V40RF-JABR01076265.1-igkv:0.03404)0.760:0.01148)0.772:0.01151)0.786:0.01252,(((V51RF-AGCE01134616.1-igkv:0.03501,V54RF-AGCE01134617.1-igkv:0.03479)0.958:0.05734,V133RF-ABGA01394075.1-igkv:0.02657)0.742:0.01003,V44RF-CABD02196588.1-igkv:0.02287)0.000:0.00055)0.760:0.01199,(V87RF-ABGA01290070.1-igkv:0.03440,(V24RF-AJFE01012249.1-igkv:0.01117,V145RF-AACZ03151858.1-igkv:0.01116)0.877:0.02302)0.880:0.03501)0.429:0.01398,(V22RF-AJFE01012238.1-igkv:0.0,V142RF-AACZ03151855.1-igkv:0.0):0.02148)0.467:0.03545)0.912:0.08519)0.951:0.12930,(((((((V57RF-AQIA01017115.1-igkv:0.00053,((V94RF-AHZZ01042080.1-igkv:0.00053,(V18RF-AQIB01144244.1-igkv:0.01093,V178RF-JYKQ01052440.1-igkv:0.01065)0.909:0.02182)0.510:0.01060,V55RF-AQIA01017115.1-igkv:0.02123)0.000:0.00054)0.984:0.00054,V180RF-JYKQ01052440.1-igkv:0.02113)0.927:0.01042,V19RF-AQIB01144247.1-igkv:0.01069)0.814:0.01047,(V7RF-JZKE01218269.1-igkv:0.04380,((V116RF-ABDC01358932.1-igkv:0.07188,V96RF-ABDC01523330.1-igkv:0.05402)0.729:0.00606,(V52RF-AGCE01134616.1-igkv:0.07011,V34RF-ABDC01360510.1-igkv:0.05361)0.771:0.01279)0.482:0.01897)0.613:0.00054)0.888:0.02082,(V28RF-ABDC01351835.1-igkv:0.04310,(V127RF-ABGA01394062.1-igkv:0.04832,V138RF-ADFV01132961.1-igkv:0.03778)0.827:0.03798)0.428:0.00053)0.811:0.01101,(((((V35RF-AGCE01134600.1-igkv:0.11106,V163RF-CABD02196559.1-igkv:0.06547)0.895:0.00055,(V114RF-AACZ03126842.1-igkv:0.00055,(V78RF-AJFE01000028.1-igkv:0.00054,V75RF-ABGA01197604.1-igkv:0.02051)0.905:0.00997)0.958:0.04197)0.621:0.00054,((V81RF-AJFE01003455.1-igkv:0.01027,V128RF-AACZ03151853.1-igkv:0.02084)0.887:0.02069,((((V97RF-AHZZ01042083.1-igkv:0.10738,(V41RF-AQIA01017097.1-igkv:0.01054,(V106RF-AHZZ01042093.1-igkv:0.01072,V188RF-JYKQ01052444.1-igkv:0.00055)0.880:0.02142)0.840:0.01087)0.847:0.00055,V44RF-JABR01088351.1-igkv:0.03083)0.773:0.01053,((V9RF-AJFE01012232.1-igkv:0.02610,V135RF-ADFV01132961.1-igkv:0.14814)0.392:0.03354,V117RF-AHZZ01042094.1-igkv:0.07686)0.726:0.01304)0.959:0.04340,(((((V189RF-ABGA01257764.1-igkv:0.07703,V99RF-ADFV01106214.1-igkv:0.03270)0.854:0.02454,((((V19RF-AJFE01012238.1-igkv:0.03178,V40RF-CABD02196577.1-igkv:0.05423)0.981:0.06780,V31RF-AGCE01134597.1-igkv:0.02650)0.865:0.02734,V70RF-JABR01094257.1-igkv:0.10133)0.758:0.01046,V36RF-AGCE01134600.1-igkv:0.00053)0.848:0.02217)0.403:0.01097,V133RF-ADFV01132961.1-igkv:0.03510)0.916:0.03133,(((V198RF-AQIA01017094.1-igkv:0.02380,V8RF-AHZZ01042101.1-igkv:0.02806)0.540:0.01069,((V43RF-AQIA01017097.1-igkv:0.05488,V108RF-AHZZ01042093.1-igkv:0.00054)0.248:0.01901,V6RF-AQIB01144236.1-igkv:0.00215)0.848:0.02287)0.736:0.02798,V55RF-JYKQ01052451.1-igkv:0.00055)0.920:0.03046)0.484:0.00054,(V191RF-ABGA01257777.1-igkv:0.02120,V225RF-ABGA01322683.1-igkv:0.02165)0.931:0.03140)0.376:0.00055)0.000:0.00054)0.790:0.00979)0.899:0.02208,((V115RF-AHZZ01042093.1-igkv:0.04699,(V7RF-AQIB01144237.1-igkv:0.07817,(V197RF-AQIA01017094.1-igkv:0.02994,(V6RF-AHZZ01042100.1-igkv:0.03155,(V109RF-AHZZ01042093.1-igkv:0.02054,V54RF-JYKQ01052451.1-igkv:0.02087)0.784:0.01038)0.602:0.00217)0.745:0.01544)0.973:0.07426)0.723:0.01433,((((V140RF-ADFV01132961.1-igkv:0.03673,(V40RF-AGCE01134603.1-igkv:0.07025,(V103RF-JABR01067077.1-igkv:0.05690,(V59RF-AQIA01017115.1-igkv:0.02074,(V182RF-JYKQ01052440.1-igkv:0.00553,(V92RF-AHZZ01042079.1-igkv:0.02159,V98RF-JABR01061517.1-igkv:0.02108)0.819:0.00942)0.842:0.00651)0.841:0.02306)0.855:0.03008)0.677:0.00362)0.815:0.01838,V188RF-ABGA01257764.1-igkv:0.03279)0.751:0.01020,V43RF-AGCE01134604.1-igkv:0.02151)0.766:0.00878,(V39RF-AGCE01134602.1-igkv:0.08574,(((V34RF-AGCE01134600.1-igkv:0.02369,V44RF-AGCE01134604.1-igkv:0.11884)0.844:0.04787,((((V102RF-JABR01064858.1-igkv:0.02238,((V90RF-AHZZ01042078.1-igkv:0.03301,V175RF-JYKQ01052437.1-igkv:0.07145)0.751:0.01264,((V158RF-JYKQ01005048.1-igkv:0.03094,((V13RF-AJFE01012234.1-igkv:0.01052,V133RF-AACZ03151853.1-igkv:0.00055)0.888:0.03454,(V146RF-ADFV01132961.1-igkv:0.05518,((V16RF-AJFE01012235.1-igkv:0.0,V137RF-AACZ03151853.1-igkv:0.0):0.05098,V159RF-CABD02196545.1-igkv:0.03799)0.571:0.02389)0.601:0.04525)0.837:0.02733)0.704:0.00742,(V232RF-AQIB01159121.1-igkv:0.00055,V201RF-AQIA01017118.1-igkv:0.04637)0.827:0.02266)0.302:0.01111)0.817:0.02054)0.806:0.01015,(((V25RF-AQIB01144263.1-igkv:0.02317,(V200RF-AQIA01017118.1-igkv:0.01131,(V24RF-AQIB01144263.1-igkv:0.04137,V176RF-JYKQ01052439.1-igkv:0.04440)0.735:0.01139)0.803:0.01236)0.610:0.00053,V142RF-ADFV01132961.1-igkv:0.03362)0.911:0.02271,(V157RF-ABGA01199503.1-igkv:0.01123,V160RF-CABD02196547.1-igkv:0.04607)0.766:0.01157)1.000:0.00054)0.287:0.01957,(V205RF-AQIA01017118.1-igkv:0.01184,((V28RF-AQIB01144263.1-igkv:0.0,V29RF-AQIB01144264.1-igkv:0.0,V24RF-JABR01076260.1-igkv:0.0):0.00055,V40RF-AHZZ01104241.1-igkv:0.01131)0.933:0.03413)0.947:0.04842)0.847:0.02127,V23RF-AQIB01144258.1-igkv:0.05991)0.822:0.02793)0.777:0.02038,(V38RF-ABDC01360670.1-igkv:0.06530,(((V30RF-ABDC01351837.1-igkv:0.04223,((V6RF-JZKE01218259.1-igkv:0.02638,V31RF-JZKE01296733.1-igkv:0.02640)0.941:0.05430,V137RF-ABDC01562688.1-igkv:0.02751)0.353:0.03129)0.303:0.01080,V57RF-ABDC01394567.1-igkv:0.05469)0.917:0.03991,(V81RF-ABDC01446518.1-igkv:0.02860,V85RF-ABDC01472745.1-igkv:0.05204)0.863:0.03432)0.795:0.03109)0.907:0.04914)0.957:0.06090)0.813:0.02076)0.754:0.01023)0.842:0.02222)0.797:0.00977,((((V7RF-AHZZ01042101.1-igkv:0.01108,V110RF-AHZZ01042093.1-igkv:0.01016)0.728:0.02164,(V45RF-AQIA01017097.1-igkv:0.02141,V8RF-AQIB01144237.1-igkv:0.03207)0.934:0.00054)0.929:0.04561,(V26RF-AQIB01144263.1-igkv:0.03189,V46RF-AGCE01134609.1-igkv:0.10538)0.728:0.03540)0.911:0.04160,((V48RF-AQIA01017097.1-igkv:0.03250,V191RF-JYKQ01052444.1-igkv:0.03213)0.000:0.00053,((((((((V105RF-AHZZ01042093.1-igkv:0.00232,V46RF-JABR01088351.1-igkv:0.15207)0.974:0.07324,(V12RF-AQIB01144242.1-igkv:0.04386,((V102RF-AHZZ01042091.1-igkv:0.02299,((V15RF-AQIB01144243.1-igkv:0.03302,(V122RF-AQIA01058132.1-igkv:0.00054,(V100RF-AHZZ01042085.1-igkv:0.03233,V185RF-JYKQ01052442.1-igkv:0.00054)0.923:0.01021)0.923:0.01071)0.972:0.00054,(V39RF-CABD02196568.1-igkv:0.01077,(V14RF-AJFE01012234.1-igkv:0.00055,V134RF-AACZ03151853.1-igkv:0.01052)0.913:0.03337)0.905:0.04323)0.887:0.03248)0.743:0.00965,(((V51RF-AQIA01017100.1-igkv:0.02237,(V99RF-AHZZ01042085.1-igkv:0.01065,V193RF-JYKQ01052444.1-igkv:0.04634)0.784:0.01114)0.857:0.00055,(V14RF-AQIB01144242.1-igkv:0.02144,V187RF-JYKQ01052443.1-igkv:0.01103)0.540:0.01084)0.926:0.03334,(V49RF-AQIA01017099.1-igkv:0.02087,V146RF-AQIB01158310.1-igkv:0.03260)0.720:0.01145)0.090:0.00054)0.764:0.01075)0.766:0.00549)0.772:0.00816,(V41RF-AGCE01134603.1-igkv:0.04720,V11RF-AQIB01144240.1-igkv:0.05861)0.774:0.01057)0.871:0.00062,V143RF-ADFV01132961.1-igkv:0.05567)0.862:0.03141,((V58RF-ABDC01396012.1-igkv:0.03880,(((V37RF-ABDC01360666.1-igkv:0.02340,V36RF-ABDC01360510.1-igkv:0.03028)0.290:0.01147,(V104RF-ABDC01583217.1-igkv:0.00054,V27RF-ABDC01351832.1-igkv:0.04467)0.801:0.02007)0.688:0.02241,V5RF-JZKE01218259.1-igkv:0.03923)0.687:0.02724)0.892:0.03722,(V33RF-AQIB01144264.1-igkv:0.10010,((V202RF-AQIA01017118.1-igkv:0.03282,(V91RF-AHZZ01042078.1-igkv:0.00055,V157RF-JYKQ01005045.1-igkv:0.01085)0.883:0.00054)0.975:0.07145,(V179RF-JYKQ01052440.1-igkv:0.01053,(V56RF-AQIA01017115.1-igkv:0.02117,V95RF-AHZZ01042080.1-igkv:0.02122)0.000:0.00055)0.781:0.01106)0.846:0.02119)0.756:0.01139)0.749:0.01083)0.766:0.01030,V47RF-JABR01088351.1-igkv:0.03401)0.835:0.02262,((V10RF-AQIB01144237.1-igkv:0.04326,V113RF-AHZZ01042093.1-igkv:0.05163)0.918:0.03960,((V144RF-ADFV01132961.1-igkv:0.04276,((V15RF-AJFE01012234.1-igkv:0.0,V135RF-AACZ03151853.1-igkv:0.0):0.02089,V126RF-ABGA01394059.1-igkv:0.02086)0.779:0.01051)0.768:0.01036,(V23RF-JABR01076259.1-igkv:0.06228,(V203RF-AQIA01017118.1-igkv:0.00055,V88RF-AHZZ01042077.1-igkv:0.01023)0.758:0.01177)0.911:0.03286)0.754:0.01060)0.788:0.01042)0.897:0.00054,(V38RF-AQIA01017094.1-igkv:0.03229,V195RF-JYKQ01052451.1-igkv:0.01072)0.015:0.01082)0.910:0.02117)0.871:0.02110)0.843:0.01071)0.987:0.00053)0.998:0.26712,(V32RF-JZKE01097728.1-igkv:0.03940,(V104RF-AGCE01134619.1-igkv:0.12993,((V98RF-ADFV01106195.1-igkv:0.02153,((V64RF-ABGA01154382.1-igkv:0.03024,V0RF-AACZ03015560.1-igkv:0.05081)0.763:0.01276,V35RF-CABD02196505.1-igkv:0.01029)0.344:0.01010)0.794:0.01047,(V5RF-JABR01020048.1-igkv:0.01027,(V64RF-AQIA01017150.1-igkv:0.00055,(V86RF-AHZZ01040808.1-igkv:0.01020,(V226RF-AQIB01144284.1-igkv:0.02009,V250RF-JYKQ01187347.1-igkv:0.00054)0.793:0.00991)0.881:0.02079)0.785:0.01035)0.894:0.02066)0.691:0.01167)0.828:0.05508)0.968:0.15621)0.922:0.09519)0.869:0.07871)0.374:0.03157,(V124RF-JYKQ01187337.1-igkv:0.00055,(V5RF-AHZZ01040804.1-igkv:0.00055,(V233RF-AQIA01017139.1-igkv:0.02210,V56RF-AQIB01144282.1-igkv:0.03399)0.881:0.00053)0.834:0.01099)0.999:0.20917)0.904:0.08342,((V106RF-AGCE01134619.1-igkv:0.04600,((V36RF-CABD02196508.1-igkv:0.0,V1RF-AACZ03015560.1-igkv:0.0):0.00055,(V65RF-ABGA01154383.1-igkv:0.01063,V61RF-AQIA01017139.1-igkv:0.10988)0.417:0.01238)0.901:0.06606)1.000:0.47772,(((V25RF-JABR01076260.1-igkv:0.00054,(V206RF-AQIA01017118.1-igkv:0.01062,(V30RF-AQIB01144264.1-igkv:0.00055,(V155RF-JYKQ01005033.1-igkv:0.01076,V41RF-AHZZ01104241.1-igkv:0.02138)0.000:0.00055)0.000:0.00055)0.862:0.02148)0.861:0.02251,(((V17RF-AJFE01012235.1-igkv:0.0,V138RF-AACZ03151853.1-igkv:0.0):0.02160,V158RF-CABD02196542.1-igkv:0.00054)0.857:0.02111,V33RF-ADFV01106193.1-igkv:0.03398)0.119:0.00937)0.968:0.09988,(V130RF-ABGA01394066.1-igkv:0.02535,((V209RF-AQIA01017120.1-igkv:0.0,V45RF-AHZZ01104243.1-igkv:0.0):0.01170,V34RF-AQIB01144265.1-igkv:0.00055)0.931:0.04735)0.949:0.07296)0.854:0.06154)0.905:0.08208)0.737:0.02635)0.949:0.13312)0.636:0.07059,(V3RF-ABDC01165520.1-igkv:0.0,V95RF-ABDC01522041.1-igkv:0.0):0.13978)0.833:0.05484,((((V22RF-AQIB01144257.1-igkv:0.01130,(V199RF-AQIA01017118.1-igkv:0.00055,(V89RF-AHZZ01042078.1-igkv:0.01103,V183RF-JYKQ01052440.1-igkv:0.04326)0.963:0.05650)0.886:0.02218)0.745:0.01104,V99RF-JABR01061517.1-igkv:0.03418)0.912:0.04785,(V20RF-AQIB01144251.1-igkv:0.03432,(V139RF-ADFV01132961.1-igkv:0.14830,(((V12RF-AJFE01012232.1-igkv:0.05900,(V152RF-ABGA01161530.1-igkv:0.02205,V141RF-ADFV01132961.1-igkv:0.04554)0.733:0.01168)0.864:0.02233,V181RF-JYKQ01052440.1-igkv:0.01085)0.553:0.02318,V58RF-AQIA01017115.1-igkv:0.00055)0.886:0.02937)0.667:0.00546)0.747:0.01022)0.815:0.04663,(V85RF-AHZZ01040807.1-igkv:0.01107,(V62RF-AQIA01017140.1-igkv:0.01115,V223RF-AQIB01144282.1-igkv:0.04562)0.964:0.00054)1.000:0.15908)0.762:0.01815)0.787:0.01823)0.000:0.00055)0.918:0.01083,((((V85RF-ABGA01285649.1-igkv:0.04452,(V51RF-AHZZ01105091.1-igkv:0.02565,V52RF-JYKQ01051984.1-igkv:0.09042)0.925:0.04186)0.749:0.01063,V45RF-AQIB01144273.1-igkv:0.02173)0.769:0.01078,((V32RF-JABR01076261.1-igkv:0.04438,(V105RF-ABGA01318850.1-igkv:0.05723,V132RF-ABGA01394071.1-igkv:0.05951)0.380:0.02227)0.771:0.01309,V47RF-AGCE01134610.1-igkv:0.10016)0.772:0.01129)0.781:0.01118,((((((V231RF-AHZZ01106331.1-igkv:0.00054,V41RF-AQIB01144269.1-igkv:0.02286)0.000:0.00055,(V216RF-AQIA01017123.1-igkv:0.02261,V220RF-AQIA01017125.1-igkv:0.00054)0.917:0.02233)0.836:0.01095,V145RF-JYKQ01005014.1-igkv:0.01096)0.000:0.00055,V59RF-AHZZ01109397.1-igkv:0.03556)0.936:0.03340,V226RF-AQIA01017128.1-igkv:0.00055)0.828:0.00080,((((V50RF-AGCE01134614.1-igkv:0.04439,V53RF-AGCE01134616.1-igkv:0.00054)0.896:0.03408,(V37RF-JABR01076263.1-igkv:0.00055,(V255RF-AHZZ01189918.1-igkv:0.01142,V207RF-JYKQ01076935.1-igkv:0.01089)0.986:0.05765)0.900:0.02208)0.767:0.01113,V42RF-JABR01076266.1-igkv:0.02238)0.000:0.00054,(V35RF-JABR01076263.1-igkv:0.02196,(V52RF-AQIB01144276.1-igkv:0.01128,((V206RF-JYKQ01075085.1-igkv:0.03347,(V248RF-AHZZ01111367.1-igkv:0.01105,(V245RF-AHZZ01111138.1-igkv:0.02223,(V240RF-AHZZ01107399.1-igkv:0.00055,V174RF-JYKQ01044662.1-igkv:0.01118)0.966:0.03365)0.000:0.00055)0.794:0.00055)0.782:0.02250,(V53RF-AQIB01144276.1-igkv:0.03292,V41RF-JABR01076266.1-igkv:0.02255)0.879:0.00054)0.819:0.01114)0.754:0.01070)0.888:0.02285)0.951:0.03351)0.889:0.03312)1.000:0.00185)0.918:0.01000)0.891:0.02239,(((((V154RF-ABGA01180641.1-igkv:0.01088,V156RF-ABGA01180644.1-igkv:0.01126)0.936:0.03359,(V106RF-ABGA01321409.1-igkv:0.01111,V193RF-ABGA01276916.1-igkv:0.01136)0.914:0.03425)0.752:0.01105,((V230RF-AQIA01017135.1-igkv:0.01099,V145RF-AQIB01156901.1-igkv:0.01120)0.887:0.02874,((V242RF-AHZZ01110488.1-igkv:0.01221,(((V48RF-AQIB01144274.1-igkv:0.02211,(V214RF-JYKQ01081225.1-igkv:0.03208,(V50RF-JYKQ01051981.1-igkv:0.00055,(V224RF-AQIA01017128.1-igkv:0.03446,V60RF-AHZZ01109397.1-igkv:0.01127)0.031:0.00053)0.946:0.04628)0.878:0.02975)0.820:0.01767,((V76RF-AHZZ01176978.1-igkv:0.02201,(V243RF-AHZZ01111138.1-igkv:0.0,V246RF-AHZZ01111367.1-igkv:0.0):0.00053)0.870:0.01095,(V172RF-JYKQ01044654.1-igkv:0.01095,(V228RF-AQIA01017130.1-igkv:0.04746,V229RF-AQIA01017133.1-igkv:0.00053)0.899:0.01074)0.764:0.01104)0.953:0.00054)0.888:0.02224,V50RF-AQIB01144276.1-igkv:0.04617)0.735:0.01120)0.754:0.01082,V39RF-JABR01076264.1-igkv:0.05615)0.848:0.02932)0.793:0.01851)0.789:0.01115,(V110RF-ABGA01356721.1-igkv:0.01095,((((V42RF-AGCE01134604.1-igkv:0.03421,(V27RF-AQIB01144263.1-igkv:0.03299,(V87RF-AHZZ01042076.1-igkv:0.00055,(V204RF-AQIA01017118.1-igkv:0.02209,V156RF-JYKQ01005040.1-igkv:0.01083)0.853:0.00055)0.000:0.00053)0.978:0.07432)0.718:0.01129,V145RF-ADFV01132961.1-igkv:0.03390)0.014:0.00055,(V136RF-AACZ03151853.1-igkv:0.03303,V109RF-ABGA01342015.1-igkv:0.00054)0.775:0.01091)0.935:0.06840,((V211RF-AQIA01017120.1-igkv:0.0,V47RF-AHZZ01104243.1-igkv:0.0,V151RF-JYKQ01005026.1-igkv:0.0):0.00055,V36RF-AQIB01144265.1-igkv:0.01158)0.974:0.05984)0.677:0.01318)0.000:0.00053)0.924:0.02229,((V38RF-AGCE01134600.1-igkv:0.10378,V84RF-ABGA01285648.1-igkv:0.05236)0.778:0.01842,(V38RF-CABD02196563.1-igkv:0.01107,(V111RF-ABGA01356722.1-igkv:0.13206,V144RF-AACZ03151857.1-igkv:0.03208)0.751:0.01353)0.791:0.01205)0.777:0.01052)0.000:0.00054)0.419:0.01109)0.000:0.00054,(V141RF-AACZ03151855.1-igkv:0.00054,(V40RF-ADFV01106195.1-igkv:0.02330,(V155RF-ABGA01180644.1-igkv:0.03379,(V217RF-AQIA01017123.1-igkv:0.00054,(V232RF-AHZZ01106331.1-igkv:0.00055,V144RF-JYKQ01005013.1-igkv:0.01097)0.919:0.01125)0.918:0.03419)0.915:0.03441)0.000:0.00055)0.824:0.01119)0.904:0.02261,(V151RF-ABGA01154386.1-igkv:0.05807,V41RF-ADFV01106195.1-igkv:0.02270)0.945:0.00054);
