# Supplementary material for: Iterative Variable Gene Discovery from Whole Genome Sequencing with a Bootstrapped Multiresolution Algorithm
Source: Comput Math Methods Med. 2019 Feb 11;2019:3780245. doi: 10.1155/2019/3780245 (PMC6388353; doi:10.1155/2019/3780245)
Supplement: Supplementary Materials — supp_materialsV2.pdf: this is an updated document, which includes new figures requested by the reviewer. sequences_alignments.zip: these are genome sequence files that are relevant for reproducing some of the results. [file 3780245.f1.zip › 3780245.f1/sequences_alignments/trav_0.dnd]

(
(
Vs1077|Homo_sapiens|ABBA01061638.1|trav:0.435112
,
(
(
(
Vs526|Homo_sapiens|ABBA01061266.1|trav:0.132979
,
Vs148|Mus_m2|124902244|trav:0.132979
):0.0917553
,
(
Vs554|Homo_sapiens|ABBA01061270.1|trav:0.169289
,
(
Vs557|Homo_sapiens|ABBA01061272.1|trav:0.132979
,
Vs245|Mus_m2|124902244|trav:0.132979
):0.0363102
):0.0554451
):0.190397
,
(
Vs1006|Homo_sapiens|ABBA01053779.1|trav:0.420012
,
(
Vs564|Homo_sapiens|ABBA01061273.1|trav:0.396301
,
(
(
(
(
Vs183|Mus_m2|124902244|trav:0.010101
,
Vs239|Mus_m2|124902244|trav:0.010101
):0
,
Vs208|Mus_m2|124902244|trav:0.010101
):0.214038
,
(
Vs542|Homo_sapiens|ABBA01061267.1|trav:0.180195
,
(
Vs561|Homo_sapiens|ABBA01061272.1|trav:0.0357143
,
Vs562|Homo_sapiens|ABBA01061272.1|trav:0.0357143
):0.144481
):0.0439439
):0.160586
,
(
(
Vs147|Mus_m2|124902244|trav:0.169355
,
(
Vs524|Homo_sapiens|ABBA01061265.1|trav:0.0967742
,
Vs523|Homo_sapiens|ABBA01061263.1|trav:0.0967742
):0.0725807
):0.208725
,
(
(
(
Vs558|Homo_sapiens|ABBA01061272.1|trav:0.204301
,
Vs556|Homo_sapiens|ABBA01061271.1|trav:0.204301
):0.077022
,
(
Vs559|Homo_sapiens|ABBA01061272.1|trav:0.241906
,
(
Vs553|Homo_sapiens|ABBA01061270.1|trav:0.220109
,
(
Vs555|Homo_sapiens|ABBA01061271.1|trav:0.188172
,
Vs244|Mus_m2|124902244|trav:0.188172
):0.0319366
):0.0217976
):0.0394168
):0.0614214
,
(
(
Vs565|Homo_sapiens|ABBA01061274.1|trav:0.316144
,
(
(
Vs211|Mus_m2|124902244|trav:0.123656
,
(
(
(
Vs202|Mus_m2|124902244|trav:0
,
Vs177|Mus_m2|124902244|trav:0
):0.0268817
,
Vs234|Mus_m2|124902244|trav:0.0268817
):0.0672043
,
(
(
Vs194|Mus_m2|124902244|trav:0
,
Vs170|Mus_m2|124902244|trav:0
):0.00537634
,
Vs227|Mus_m2|124902244|trav:0.00537634
):0.0887097
):0.0295699
):0.122212
,
(
Vs550|Homo_sapiens|ABBA01061268.1|trav:0.230781
,
(
Vs242|Mus_m2|124902244|trav:0.185636
,
(
(
Vs181|Mus_m2|124902244|trav:0
,
Vs206|Mus_m2|124902244|trav:0
):0.155253
,
(
Vs209|Mus_m2|124902244|trav:0.10192
,
(
(
Vs224|Mus_m2|124902244|trav:0.0289474
,
(
Vs167|Mus_m2|124902244|trav:0.00520833
,
Vs191|Mus_m2|124902244|trav:0.00520833
):0.023739
):0.0496799
,
(
(
Vs198|Mus_m2|124902244|trav:0
,
Vs174|Mus_m2|124902244|trav:0
):0.0340204
,
(
Vs230|Mus_m2|124902244|trav:0.0422207
,
(
Vs184|Mus_m2|124902244|trav:0.0212766
,
Vs240|Mus_m2|124902244|trav:0.0212766
):0.0209442
):-0.00820036
):0.0446069
):0.0232929
):0.0533325
):0.0303832
):0.0451447
):0.0150874
):0.0702757
):0.0322292
,
(
(
(
Vs527|Homo_sapiens|ABBA01061266.1|trav:0.189474
,
(
(
Vs232|Mus_m2|124902244|trav:0.0208333
,
(
Vs176|Mus_m2|124902244|trav:0
,
Vs200|Mus_m2|124902244|trav:0
):0.0208333
):0.0677083
,
(
Vs241|Mus_m2|124902244|trav:0.0208333
,
Vs149|Mus_m2|124902244|trav:0.0208333
):0.0677083
):0.100932
):0.0249272
,
(
Vs541|Homo_sapiens|ABBA01061267.1|trav:0.197595
,
(
(
Vs150|Mus_m2|124902244|trav:0.127604
,
(
(
Vs203|Mus_m2|124902244|trav:0
,
Vs178|Mus_m2|124902244|trav:0
):0.0208333
,
Vs235|Mus_m2|124902244|trav:0.0208333
):0.106771
):0.0329222
,
(
Vs537|Homo_sapiens|ABBA01061266.1|trav:0.147368
,
(
(
Vs219|Mus_m2|124902244|trav:0
,
Vs162|Mus_m2|124902244|trav:0
):0.00526316
,
Vs187|Mus_m2|124902244|trav:0.00526316
):0.142105
):0.0131579
):0.0370682
):0.0168063
):0.108039
,
(
(
(
(
(
Vs189|Mus_m2|124902244|trav:0
,
Vs165|Mus_m2|124902244|trav:0
):0.0478723
,
Vs222|Mus_m2|124902244|trav:0.0478723
):0.0899269
,
(
(
(
Vs180|Mus_m2|124902244|trav:0
,
Vs205|Mus_m2|124902244|trav:0
):0.0265957
,
Vs237|Mus_m2|124902244|trav:0.0265957
):0.0964096
,
(
(
Vs152|Mus_m2|124902244|trav:0.0345745
,
(
(
Vs215|Mus_m2|124902244|trav:0
,
Vs158|Mus_m2|124902244|trav:0
):0.0105263
,
Vs185|Mus_m2|124902244|trav:0.0105263
):0.0240482
):0.0412234
,
(
(
Vs213|Mus_m2|124902244|trav:0
,
Vs156|Mus_m2|124902244|trav:0
):0.0691489
,
(
Vs210|Mus_m2|124902244|trav:0
,
Vs154|Mus_m2|124902244|trav:0
):0.0691489
):0.00664894
):0.0472074
):0.0147939
):0.102537
,
(
Vs534|Homo_sapiens|ABBA01061266.1|trav:0.154255
,
(
Vs544|Homo_sapiens|ABBA01061267.1|trav:0.121053
,
Vs538|Homo_sapiens|ABBA01061266.1|trav:0.121053
):0.0332027
):0.086081
):0.100108
,
(
(
Vs532|Homo_sapiens|ABBA01061266.1|trav:0.192708
,
(
Vs164|Mus_m2|124902244|trav:0
,
Vs221|Mus_m2|124902244|trav:0
):0.192708
):0.11706
,
(
(
Vs528|Homo_sapiens|ABBA01061266.1|trav:0.258976
,
(
Vs547|Homo_sapiens|ABBA01061267.1|trav:0.144947
,
(
(
Vs216|Mus_m2|124902244|trav:0.0106383
,
Vs159|Mus_m2|124902244|trav:0.0106383
):0.0950798
,
(
Vs207|Mus_m2|124902244|trav:0.0505319
,
(
Vs182|Mus_m2|124902244|trav:0.0265957
,
Vs238|Mus_m2|124902244|trav:0.0265957
):0.0239362
):0.0551862
):0.0392287
):0.114029
):0.0534097
,
(
Vs563|Homo_sapiens|ABBA01061273.1|trav:0.311669
,
(
Vs552|Homo_sapiens|ABBA01061270.1|trav:0.317151
,
(
Vs533|Homo_sapiens|ABBA01061266.1|trav:0.327198
,
(
Vs560|Homo_sapiens|ABBA01061272.1|trav:0.289712
,
(
Vs549|Homo_sapiens|ABBA01061268.1|trav:0.284574
,
(
Vs548|Homo_sapiens|ABBA01061268.1|trav:0.228723
,
Vs529|Homo_sapiens|ABBA01061266.1|trav:0.228723
):0.055851
):0.00513721
):0.037486
):-0.0100469
):-0.0054819
):0.000716865
):-0.00261706
):0.0306759
):-0.0180043
):0.0259326
):-0.00562847
):0.0353356
):0.00664443
):0.0115768
):0.0237112
):-0.00488129
):0.0199811
):0.730514
,
(
(
Vs546|Homo_sapiens|ABBA01061267.1|trav:0.307381
,
(
Vs540|Homo_sapiens|ABBA01061267.1|trav:0.262814
,
(
Vs525|Homo_sapiens|ABBA01061266.1|trav:0.191134
,
(
(
Vs545|Homo_sapiens|ABBA01061267.1|trav:0.100515
,
(
Vs535|Homo_sapiens|ABBA01061266.1|trav:0.056701
,
Vs539|Homo_sapiens|ABBA01061266.1|trav:0.056701
):0.0438144
):0.08005
,
(
(
Vs530|Homo_sapiens|ABBA01061266.1|trav:0.123711
,
Vs536|Homo_sapiens|ABBA01061266.1|trav:0.123711
):0.0442792
,
(
Vs243|Mus_m2|124902244|trav:0.171197
,
(
(
Vs217|Mus_m2|124902244|trav:0.0104167
,
Vs160|Mus_m2|124902244|trav:0.0104167
):0.131185
,
(
Vs201|Mus_m2|124902244|trav:0.030599
,
(
(
Vs196|Mus_m2|124902244|trav:0
,
Vs172|Mus_m2|124902244|trav:0
):0.0247396
,
(
Vs233|Mus_m2|124902244|trav:0.0180412
,
(
(
Vs169|Mus_m2|124902244|trav:0
,
Vs193|Mus_m2|124902244|trav:0
):0.00515464
,
Vs226|Mus_m2|124902244|trav:0.00515464
):0.0128866
):0.00669835
):0.00585938
):0.111003
):0.0295956
):-0.00320655
):0.0125749
):0.0105689
):0.0716792
):0.0445673
):0.00240389
,
(
(
(
(
Vs166|Mus_m2|124902244|trav:0
,
Vs190|Mus_m2|124902244|trav:0
):0.0463918
,
Vs223|Mus_m2|124902244|trav:0.0463918
):0.0326192
,
(
(
(
Vs197|Mus_m2|124902244|trav:0
,
Vs173|Mus_m2|124902244|trav:0
):0.0252525
,
Vs229|Mus_m2|124902244|trav:0.0252525
):0.0502683
,
(
(
Vs195|Mus_m2|124902244|trav:0
,
Vs171|Mus_m2|124902244|trav:0
):0.0416667
,
Vs228|Mus_m2|124902244|trav:0.0416667
):0.0338542
):0.00349012
):0.173582
,
(
(
Vs531|Homo_sapiens|ABBA01061266.1|trav:0.128906
,
(
Vs161|Mus_m2|124902244|trav:0.0286458
,
(
Vs218|Mus_m2|124902244|trav:0.00520833
,
Vs186|Mus_m2|124902244|trav:0.00520833
):0.0234375
):0.10026
):0.0242513
,
(
Vs543|Homo_sapiens|ABBA01061267.1|trav:0.148112
,
(
(
(
Vs204|Mus_m2|124902244|trav:0
,
Vs179|Mus_m2|124902244|trav:0
):0.015625
,
Vs236|Mus_m2|124902244|trav:0.015625
):0.127279
,
(
(
Vs188|Mus_m2|124902244|trav:0.0255102
,
(
Vs163|Mus_m2|124902244|trav:0
,
Vs220|Mus_m2|124902244|trav:0
):0.0255102
):0.112391
,
(
(
Vs212|Mus_m2|124902244|trav:0.00520833
,
Vs155|Mus_m2|124902244|trav:0.00520833
):0.0611979
,
(
(
Vs214|Mus_m2|124902244|trav:0.0102041
,
Vs157|Mus_m2|124902244|trav:0.0102041
):0.0418793
,
(
Vs151|Mus_m2|124902244|trav:0.0260417
,
Vs153|Mus_m2|124902244|trav:0.0260417
):0.0260417
):0.0143229
):0.071495
):0.00500238
):0.00520833
):0.00504558
):0.0994352
):0.0571921
):0.730514
)
;
