# Supplementary material for: Iterative Variable Gene Discovery from Whole Genome Sequencing with a Bootstrapped Multiresolution Algorithm
Source: Comput Math Methods Med. 2019 Feb 11;2019:3780245. doi: 10.1155/2019/3780245 (PMC6388353; doi:10.1155/2019/3780245)
Supplement: Supplementary Materials — supp_materialsV2.pdf: this is an updated document, which includes new figures requested by the reviewer. sequences_alignments.zip: these are genome sequence files that are relevant for reproducing some of the results. [file 3780245.f1.zip › 3780245.f1/sequences_alignments/trav_0.nwk]

(((Vs548|Homo_sapiens|ABBA01061268.1|trav:0.32504,(Vs552|Homo_sapiens|ABBA01061270.1|trav:0.45930,Vs560|Homo_sapiens|ABBA01061272.1|trav:0.42175)0.428:0.06129)0.853:0.08116,(Vs563|Homo_sapiens|ABBA01061273.1|trav:0.52905,Vs529|Homo_sapiens|ABBA01061266.1|trav:0.45158)0.729:0.02018)0.811:0.04144,((Vs532|Homo_sapiens|ABBA01061266.1|trav:0.19804,(Vs164|Mus_m2|124902244|trav:0.0,Vs221|Mus_m2|124902244|trav:0.0):0.27762)0.987:0.26185,(Vs565|Homo_sapiens|ABBA01061274.1|trav:0.34401,((Vs211|Mus_m2|124902244|trav:0.14917,(((Vs194|Mus_m2|124902244|trav:0.0,Vs170|Mus_m2|124902244|trav:0.0):0.01018,Vs227|Mus_m2|124902244|trav:0.00055)0.998:0.16084,((Vs202|Mus_m2|124902244|trav:0.0,Vs177|Mus_m2|124902244|trav:0.0):0.04722,Vs234|Mus_m2|124902244|trav:0.00451)0.131:0.03905)0.308:0.04858)0.986:0.27341,(Vs550|Homo_sapiens|ABBA01061268.1|trav:0.17365,((Vs224|Mus_m2|124902244|trav:0.01028,(((Vs181|Mus_m2|124902244|trav:0.0,Vs206|Mus_m2|124902244|trav:0.0):0.16851,(Vs209|Mus_m2|124902244|trav:0.04330,Vs242|Mus_m2|124902244|trav:0.26253)0.913:0.05032)0.833:0.02592,(Vs167|Mus_m2|124902244|trav:0.00051,Vs191|Mus_m2|124902244|trav:0.00964)0.904:0.01987)0.831:0.01938)0.775:0.04152,(Vs230|Mus_m2|124902244|trav:0.05123,(Vs184|Mus_m2|124902244|trav:0.00054,((Vs198|Mus_m2|124902244|trav:0.0,Vs174|Mus_m2|124902244|trav:0.0):0.04030,Vs240|Mus_m2|124902244|trav:0.02035)0.865:0.02000)0.738:0.01025)0.870:0.05646)0.988:0.21573)0.317:0.07141)0.997:0.37963)0.852:0.11026)0.830:0.08476,(((Vs528|Homo_sapiens|ABBA01061266.1|trav:0.37169,(Vs547|Homo_sapiens|ABBA01061267.1|trav:0.04940,((Vs216|Mus_m2|124902244|trav:0.01003,Vs159|Mus_m2|124902244|trav:0.00963)0.910:0.07839,(Vs207|Mus_m2|124902244|trav:0.03996,(Vs182|Mus_m2|124902244|trav:0.03407,Vs238|Mus_m2|124902244|trav:0.02516)0.886:0.03381)0.936:0.08470)0.990:0.19378)0.990:0.22971)0.810:0.09628,(Vs533|Homo_sapiens|ABBA01061266.1|trav:0.61783,Vs549|Homo_sapiens|ABBA01061268.1|trav:0.24405)0.946:0.20030)0.927:0.14246,(((Vs558|Homo_sapiens|ABBA01061272.1|trav:0.15145,Vs556|Homo_sapiens|ABBA01061271.1|trav:0.33676)0.982:0.22867,(Vs559|Homo_sapiens|ABBA01061272.1|trav:0.36185,(Vs244|Mus_m2|124902244|trav:0.29902,(Vs555|Homo_sapiens|ABBA01061271.1|trav:0.18228,Vs553|Homo_sapiens|ABBA01061270.1|trav:0.35204)0.530:0.03699)0.916:0.15444)0.902:0.14232)0.976:0.25077,(((Vs527|Homo_sapiens|ABBA01061266.1|trav:0.17518,((Vs232|Mus_m2|124902244|trav:0.03164,(Vs176|Mus_m2|124902244|trav:0.0,Vs200|Mus_m2|124902244|trav:0.0):0.00953)0.989:0.15130,(Vs241|Mus_m2|124902244|trav:0.00973,Vs149|Mus_m2|124902244|trav:0.03440)0.669:0.01072)0.991:0.19194)0.896:0.08518,(Vs541|Homo_sapiens|ABBA01061267.1|trav:0.27647,((Vs150|Mus_m2|124902244|trav:0.15509,((Vs203|Mus_m2|124902244|trav:0.0,Vs178|Mus_m2|124902244|trav:0.0):0.01402,Vs235|Mus_m2|124902244|trav:0.02469)0.992:0.15276)0.823:0.06521,(Vs537|Homo_sapiens|ABBA01061266.1|trav:0.19414,((Vs219|Mus_m2|124902244|trav:0.0,Vs162|Mus_m2|124902244|trav:0.0):0.00969,Vs187|Mus_m2|124902244|trav:0.00055)0.985:0.14608)0.297:0.03616)0.767:0.04068)0.887:0.08018)0.987:0.24357,(((Vs524|Homo_sapiens|ABBA01061265.1|trav:0.00050,(Vs147|Mus_m2|124902244|trav:0.33787,Vs523|Homo_sapiens|ABBA01061263.1|trav:0.13206)0.553:0.09740)1.000:0.89805,((((Vs561|Homo_sapiens|ABBA01061272.1|trav:0.03014,Vs562|Homo_sapiens|ABBA01061272.1|trav:0.03868)0.919:0.14105,(Vs542|Homo_sapiens|ABBA01061267.1|trav:0.15861,(Vs239|Mus_m2|124902244|trav:0.00055,(Vs183|Mus_m2|124902244|trav:0.00899,Vs208|Mus_m2|124902244|trav:0.00906)0.831:0.00904)1.000:0.31751)0.917:0.14219)0.986:0.47878,((Vs525|Homo_sapiens|ABBA01061266.1|trav:0.17695,(((((Vs530|Homo_sapiens|ABBA01061266.1|trav:0.22155,((Vs217|Mus_m2|124902244|trav:0.00054,Vs160|Mus_m2|124902244|trav:0.02067)0.997:0.22431,(((((Vs169|Mus_m2|124902244|trav:0.0,Vs193|Mus_m2|124902244|trav:0.0):0.01030,Vs226|Mus_m2|124902244|trav:0.00055)0.788:0.01037,Vs201|Mus_m2|124902244|trav:0.03159)0.779:0.01032,(Vs196|Mus_m2|124902244|trav:0.0,Vs172|Mus_m2|124902244|trav:0.0):0.03218)0.126:0.00054,Vs233|Mus_m2|124902244|trav:0.01042)0.883:0.05454)0.975:0.11585)0.419:0.02142,(Vs540|Homo_sapiens|ABBA01061267.1|trav:0.49666,Vs536|Homo_sapiens|ABBA01061266.1|trav:0.00054)0.979:0.10344)0.866:0.06493,Vs243|Mus_m2|124902244|trav:0.24047)0.962:0.11301,(Vs545|Homo_sapiens|ABBA01061267.1|trav:0.09622,(Vs535|Homo_sapiens|ABBA01061266.1|trav:0.07444,Vs539|Homo_sapiens|ABBA01061266.1|trav:0.04099)0.915:0.07443)0.844:0.06502)0.869:0.06571,Vs546|Homo_sapiens|ABBA01061267.1|trav:0.36603)0.902:0.11191)0.823:0.15255,((((Vs188|Mus_m2|124902244|trav:0.01720,(Vs163|Mus_m2|124902244|trav:0.0,Vs220|Mus_m2|124902244|trav:0.0):0.03163)0.952:0.11187,((Vs531|Homo_sapiens|ABBA01061266.1|trav:0.20499,(Vs218|Mus_m2|124902244|trav:0.00055,(Vs161|Mus_m2|124902244|trav:0.05123,Vs186|Mus_m2|124902244|trav:0.00055)0.701:0.00989)0.948:0.08915)0.923:0.08270,(Vs543|Homo_sapiens|ABBA01061267.1|trav:0.20177,(((Vs204|Mus_m2|124902244|trav:0.0,Vs179|Mus_m2|124902244|trav:0.0):0.03136,Vs236|Mus_m2|124902244|trav:0.00054)0.999:0.16677,((Vs212|Mus_m2|124902244|trav:0.00991,Vs155|Mus_m2|124902244|trav:0.00054)0.988:0.07469,(Vs153|Mus_m2|124902244|trav:0.02066,(Vs151|Mus_m2|124902244|trav:0.00053,(Vs214|Mus_m2|124902244|trav:0.01979,Vs157|Mus_m2|124902244|trav:0.00055)0.992:0.07709)0.442:0.03180)0.857:0.02101)0.884:0.04488)0.296:0.02557)0.697:0.03718)0.219:0.02435)0.819:0.14493,Vs564|Homo_sapiens|ABBA01061273.1|trav:0.70815)0.114:0.07153,(((Vs166|Mus_m2|124902244|trav:0.0,Vs190|Mus_m2|124902244|trav:0.0):0.02928,Vs223|Mus_m2|124902244|trav:0.06878)0.844:0.03128,((Vs195|Mus_m2|124902244|trav:0.0,Vs171|Mus_m2|124902244|trav:0.0):0.03109,(((Vs197|Mus_m2|124902244|trav:0.0,Vs173|Mus_m2|124902244|trav:0.0):0.00053,Vs229|Mus_m2|124902244|trav:0.04956)0.967:0.06416,Vs228|Mus_m2|124902244|trav:0.02626)0.837:0.02446)0.780:0.02316)0.997:0.32696)0.903:0.23866)0.993:0.50801)0.640:0.04634,(((Vs526|Homo_sapiens|ABBA01061266.1|trav:0.16182,Vs148|Mus_m2|124902244|trav:0.16801)0.958:0.28066,(Vs554|Homo_sapiens|ABBA01061270.1|trav:0.12772,(Vs557|Homo_sapiens|ABBA01061272.1|trav:0.14103,Vs245|Mus_m2|124902244|trav:0.17657)0.958:0.16351)0.146:0.03087)0.983:0.76177,(Vs1006|Homo_sapiens|ABBA01053779.1|trav:1.18587,Vs1077|Homo_sapiens|ABBA01061638.1|trav:2.67214)0.796:0.52269)0.368:0.24116)0.740:0.10633)0.843:0.27937,((Vs538|Homo_sapiens|ABBA01061266.1|trav:0.07875,(Vs544|Homo_sapiens|ABBA01061267.1|trav:0.10602,Vs534|Homo_sapiens|ABBA01061266.1|trav:0.19326)0.918:0.07220)0.963:0.17216,(((Vs189|Mus_m2|124902244|trav:0.0,Vs165|Mus_m2|124902244|trav:0.0):0.05941,Vs222|Mus_m2|124902244|trav:0.03590)0.981:0.13533,(((Vs180|Mus_m2|124902244|trav:0.0,Vs205|Mus_m2|124902244|trav:0.0):0.01974,Vs237|Mus_m2|124902244|trav:0.03528)0.992:0.12785,((Vs213|Mus_m2|124902244|trav:0.0,Vs156|Mus_m2|124902244|trav:0.0):0.05316,((Vs210|Mus_m2|124902244|trav:0.0,Vs154|Mus_m2|124902244|trav:0.0):0.08054,(Vs152|Mus_m2|124902244|trav:0.00994,((Vs215|Mus_m2|124902244|trav:0.0,Vs158|Mus_m2|124902244|trav:0.0):0.02021,Vs185|Mus_m2|124902244|trav:0.00054)0.978:0.05260)0.836:0.04981)0.884:0.03175)0.792:0.02685)0.231:0.02718)0.932:0.11485)0.943:0.21066)0.529:0.08185)0.934:0.18206)0.256:0.02060)0.791:0.08584);
