# Supplementary material for: Iterative Variable Gene Discovery from Whole Genome Sequencing with a Bootstrapped Multiresolution Algorithm
Source: Comput Math Methods Med. 2019 Feb 11;2019:3780245. doi: 10.1155/2019/3780245 (PMC6388353; doi:10.1155/2019/3780245)
Supplement: Supplementary Materials — supp_materialsV2.pdf: this is an updated document, which includes new figures requested by the reviewer. sequences_alignments.zip: these are genome sequence files that are relevant for reproducing some of the results. [file 3780245.f1.zip › 3780245.f1/sequences_alignments/trav_2.dnd]

(
(
(
V86RF-ADFV01192042.1-trav:0.00526316
,
V23RF-CABD02105615.1-trav:0.00526316
):0.388912
,
(
(
V167RF-JYKQ01026663.1-trav:0.214923
,
(
(
V51RF-JZKE01143891.1-trav:0.104798
,
(
V36RF-AHZZ01098200.1-trav:0.0353535
,
(
V186RF-JABR01098598.1-trav:0.0277778
,
(
(
V138RF-AQIA01064149.1-trav:0.010101
,
V72RF-JYKQ01054957.1-trav:0.010101
):0.0151515
,
V208RF-AQIB01128643.1-trav:0.0252525
):0.00252525
):0.00757576
):0.0694444
):0.106625
,
(
(
V35RF-JZKE01143868.1-trav:0.0645727
,
(
V198RF-AQIB01128637.1-trav:0.0322066
,
(
(
V121RF-JYKQ01135388.1-trav:0.0126778
,
(
V151RF-AQIA01064166.1-trav:0.00510204
,
V3RF-AHZZ01035404.1-trav:0.00510204
):0.00757576
):0.0134371
,
(
V171RF-JABR01098590.1-trav:0.0191327
,
(
V93RF-ADFV01192049.1-trav:0.0178571
,
(
V60RF-AACZ03095317.1-trav:0.00508916
,
(
(
V116RF-AJFE01024276.1-trav:0
,
V225RF-ABGA01321070.1-trav:0
):0
,
V28RF-CABD02105626.1-trav:0
):0.00508916
):0.012768
):0.00127551
):0.00698229
):0.00609169
):0.0323661
):0.113561
,
(
(
(
V193RF-JABR01098600.1-trav:0.03125
,
(
V219RF-AQIB01128644.1-trav:0.0216837
,
(
V66RF-JYKQ01054942.1-trav:0.0127551
,
(
V132RF-AQIA01064146.1-trav:0.00510204
,
V62RF-AHZZ01107545.1-trav:0.00510204
):0.00765306
):0.00892857
):0.00956633
):0.0173788
,
(
V72RF-ADFV01192039.1-trav:0.0359848
,
(
V126RF-ABGA01387831.1-trav:0.0315657
,
(
V12RF-CABD02105589.1-trav:0.0176768
,
(
(
V67RF-AJFE01069976.1-trav:0
,
V202RF-AACZ03171512.1-trav:0
):0.0151515
,
V77RF-AACZ03097618.1-trav:0.0151515
):0.00252525
):0.0138889
):0.00441919
):0.012644
):0.0545643
,
(
V65RF-JZKE01143910.1-trav:0.0568182
,
(
V54RF-JZKE01143895.1-trav:0.0530303
,
(
V49RF-ABDC01379531.1-trav:0.0454545
,
V58RF-JZKE01143896.1-trav:0.0454545
):0.00757576
):0.00378788
):0.0463749
):0.0749403
):0.0332894
):0.00350061
):0.14481
,
(
(
(
(
V59RF-ADFV01192035.1-trav:0.0154639
,
V55RF-JYKQ01054925.1-trav:0.0154639
):0.016451
,
V151RF-ABGA01113133.1-trav:0.0319149
):0.163395
,
(
(
V91RF-AGCE01026530.1-trav:0.0277062
,
(
V67RF-ADFV01192037.1-trav:0.0244845
,
(
(
V62RF-AJFE01069975.1-trav:0
,
V72RF-AACZ03097613.1-trav:0
):0.0180412
,
(
V130RF-AQIA01064146.1-trav:0.00515464
,
(
V191RF-JABR01098600.1-trav:0
,
V217RF-AQIB01128644.1-trav:0
):0.00515464
):0.0128866
):0.0064433
):0.00322165
):0.132974
,
(
(
V190RF-JABR01098600.1-trav:0.0347938
,
(
V60RF-JYKQ01054940.1-trav:0.0231959
,
(
V126RF-AQIA01064144.1-trav:0.00515464
,
V87RF-AHZZ01198216.1-trav:0.00515464
):0.0180412
):0.0115979
):0.0234979
,
(
(
V65RF-AJFE01069975.1-trav:0
,
V75RF-AACZ03097614.1-trav:0
):0.0592783
,
(
V8RF-CABD02105586.1-trav:0.0470361
,
(
V148RF-ABGA01083939.1-trav:0.0502577
,
(
V142RF-ABGA01083934.1-trav:0.0309278
,
(
V66RF-ADFV01192037.1-trav:0.0257732
,
V70RF-ADFV01192038.1-trav:0.0257732
):0.00515464
):0.0193299
):-0.00322165
):0.0122423
):-0.000986628
):0.102388
):0.03463
):0.0889568
,
(
(
(
V132RF-ABDC01454736.1-trav:0.0748698
,
(
V61RF-JZKE01143903.1-trav:0.0664062
,
(
(
(
V133RF-AQIA01064146.1-trav:0.00520833
,
(
V63RF-AHZZ01107545.1-trav:0
,
V67RF-JYKQ01054942.1-trav:0
):0.00520833
):0
,
V220RF-AQIB01128644.1-trav:0.00520833
):0.0371094
,
(
V73RF-ADFV01192039.1-trav:0.0299479
,
(
V127RF-ABGA01387833.1-trav:0.0234375
,
(
(
V68RF-AJFE01069976.1-trav:0
,
V78RF-AACZ03097618.1-trav:0
):0.00520833
,
V13RF-CABD02105590.1-trav:0.00520833
):0.0182292
):0.00651042
):0.0123698
):0.0240885
):0.00846354
):0.0561687
,
(
V75RF-JZKE01143916.1-trav:0.119572
,
(
V98RF-AGCE01026534.1-trav:0.086263
,
(
(
(
V59RF-AJFE01069975.1-trav:0.00520833
,
V69RF-AACZ03097613.1-trav:0.00520833
):0.0117188
,
(
V145RF-ABGA01083939.1-trav:0.0078125
,
(
V63RF-ADFV01192035.1-trav:0.00520833
,
V5RF-CABD02105579.1-trav:0.00520833
):0.00260417
):0.00911458
):0.0214844
,
(
(
V123RF-AQIA01064138.1-trav:0.015625
,
(
V213RF-AQIB01128644.1-trav:0
,
V57RF-JYKQ01054940.1-trav:0
):0.015625
):0.015625
,
V201RF-JABR01098604.1-trav:0.03125
):0.00716146
):0.0478516
):0.0333094
):0.0114661
):0.104733
,
(
V49RF-JZKE01143890.1-trav:0.187459
,
(
V103RF-ABDC01533415.1-trav:0.115378
,
(
V87RF-AGCE01026527.1-trav:0.0447368
,
(
V77RF-ADFV01192039.1-trav:0.0371711
,
(
V122RF-ABGA01386446.1-trav:0.0309211
,
(
V185RF-JABR01098598.1-trav:0.0276316
,
(
V35RF-AHZZ01098200.1-trav:0.0131579
,
(
(
V137RF-AQIA01064149.1-trav:0
,
V71RF-JYKQ01054957.1-trav:0
):0.00526316
,
V207RF-AQIB01128643.1-trav:0.00526316
):0.00789474
):0.0144737
):0.00328947
):0.00625
):0.00756579
):0.0706415
):0.0720806
):0.048313
):0.0484947
):0.0754673
):0.0344413
):0.771449
,
(
(
(
(
V145RF-AQIA01064165.1-trav:0.0153061
,
V208RF-AHZZ01093949.1-trav:0.0153061
):0.271928
,
V56RF-AACZ03095312.1-trav:0.287234
):0.072563
,
(
(
(
(
V68RF-JZKE01143915.1-trav:0.124753
,
(
V92RF-AGCE01026530.1-trav:0.0883224
,
(
(
V63RF-AJFE01069975.1-trav:0.00526316
,
V73RF-AACZ03097614.1-trav:0.00526316
):0.0384868
,
(
V143RF-ABGA01083937.1-trav:0.0296053
,
(
V195RF-JABR01098601.1-trav:0.0171053
,
(
(
V127RF-AQIA01064146.1-trav:0.0105263
,
V58RF-AHZZ01107544.1-trav:0.0105263
):0.00526316
,
V61RF-JYKQ01054942.1-trav:0.0157895
):0.00131579
):0.0125
):0.0141447
):0.0445724
):0.0364309
):0.0245254
,
(
(
(
V192RF-JABR01098600.1-trav:0.0221354
,
(
V131RF-AQIA01064146.1-trav:0.0130208
,
(
(
V61RF-AHZZ01107544.1-trav:0
,
V218RF-AQIB01128644.1-trav:0
):0.00520833
,
V65RF-JYKQ01054942.1-trav:0.00520833
):0.0078125
):0.00911458
):0.0345052
,
(
V141RF-ABGA01083932.1-trav:0.0325521
,
(
V71RF-ADFV01192038.1-trav:0.0234375
,
(
V66RF-AJFE01069976.1-trav:0.00520833
,
V11RF-CABD02105589.1-trav:0.00520833
):0.0182292
):0.00911458
):0.0240885
):0.0752767
,
(
V73RF-ABDC01418428.1-trav:0.109375
,
(
V53RF-JZKE01143895.1-trav:0.0833333
,
V57RF-JZKE01143896.1-trav:0.0833333
):0.0260417
):0.0225423
):0.0173614
):0.0638329
,
(
(
V46RF-ABDC01377653.1-trav:0.0631579
,
V73RF-JZKE01143916.1-trav:0.0631579
):0.100493
,
(
V97RF-AGCE01026534.1-trav:0.0995066
,
(
(
V3RF-CABD02105570.1-trav:0.0309211
,
(
V150RF-ABGA01113130.1-trav:0.025
,
(
V60RF-ADFV01192035.1-trav:0.0157895
,
(
V55RF-AJFE01069975.1-trav:0.00526316
,
V66RF-AACZ03097612.1-trav:0.00526316
):0.0105263
):0.00921053
):0.00592105
):0.0134868
,
(
(
V83RF-AHZZ01198213.1-trav:0.00526316
,
V56RF-JYKQ01054933.1-trav:0.00526316
):0.0210526
,
(
V211RF-AQIB01128644.1-trav:0.0157895
,
(
V121RF-AQIA01064137.1-trav:0.0105263
,
V198RF-JABR01098604.1-trav:0.0105263
):0.00526316
):0.0105263
):0.0180921
):0.0550987
):0.0641447
):0.0494603
):0.112902
,
(
(
V87RF-AJFE01010527.1-trav:0.280893
,
(
(
V207RF-AHZZ01093946.1-trav:0.0567329
,
(
V91RF-ADFV01192045.1-trav:0.0397256
,
(
(
V115RF-AJFE01024276.1-trav:0
,
V58RF-AACZ03095314.1-trav:0
):0.0159574
,
V201RF-AACZ03171149.1-trav:0.0159574
):0.0237682
):0.0170073
):0.0598299
,
(
V104RF-ABDC01542818.1-trav:0.0585106
,
V37RF-JZKE01143869.1-trav:0.0585106
):0.0580522
):0.16433
):0.0302944
,
(
(
V62RF-JZKE01143910.1-trav:0.0951223
,
(
(
V214RF-AQIB01128644.1-trav:0.0260417
,
(
(
(
V124RF-AQIA01064138.1-trav:0
,
V85RF-AHZZ01198214.1-trav:0
):0.0104167
,
V58RF-JYKQ01054940.1-trav:0.0104167
):0.00520833
,
V202RF-JABR01098604.1-trav:0.015625
):0.0104167
):0.00685136
,
(
V64RF-ADFV01192037.1-trav:0.0203947
,
(
V6RF-CABD02105581.1-trav:0.00911458
,
(
V146RF-ABGA01083939.1-trav:0.0078125
,
(
V60RF-AJFE01069975.1-trav:0.00520833
,
V70RF-AACZ03097613.1-trav:0.00520833
):0.00260417
):0.00130208
):0.0112802
):0.0124983
):0.0622293
):0.206426
,
(
(
(
V86RF-AGCE01026527.1-trav:0.117229
,
(
V52RF-JZKE01143893.1-trav:0.109791
,
(
V76RF-ADFV01192039.1-trav:0.0506981
,
(
(
(
V71RF-AJFE01069976.1-trav:0
,
V81RF-AACZ03097619.1-trav:0
):0.00531915
,
(
V121RF-ABGA01386446.1-trav:0
,
V15RF-CABD02105596.1-trav:0
):0.00531915
):0.0269282
,
(
V184RF-JABR01098598.1-trav:0.0272606
,
(
V222RF-AQIB01128644.1-trav:0.0146277
,
(
V136RF-AQIA01064148.1-trav:0.0132979
,
(
V34RF-AHZZ01098200.1-trav:0.00531915
,
V70RF-JYKQ01054953.1-trav:0.00531915
):0.00797872
):0.00132979
):0.012633
):0.0049867
):0.0184508
):0.0590924
):0.0074385
):0.134745
,
(
V74RF-JZKE01143916.1-trav:0.117021
,
(
V149RF-ABGA01113129.1-trav:0.0239362
,
(
V61RF-ADFV01192035.1-trav:0.0159574
,
(
(
V56RF-AJFE01069975.1-trav:0
,
V67RF-AACZ03097613.1-trav:0
):0
,
V167RF-AACZ03171395.1-trav:0
):0.0159574
):0.00797872
):0.0930851
):0.134953
):0.0504416
,
(
(
(
V94RF-ADFV01192050.1-trav:0.0246011
,
(
V29RF-CABD02105628.1-trav:0.0172872
,
(
V224RF-ABGA01321068.1-trav:0.0132979
,
(
V117RF-AJFE01024276.1-trav:0.00531915
,
V61RF-AACZ03095319.1-trav:0.00531915
):0.00797872
):0.00398936
):0.00731383
):0.015625
,
(
V93RF-JABR01039937.1-trav:0.0305851
,
(
V194RF-AQIB01128636.1-trav:0.018617
,
(
(
V152RF-AQIA01064166.1-trav:0
,
V122RF-JYKQ01135389.1-trav:0
):0.00531915
,
V4RF-AHZZ01035404.1-trav:0.00531915
):0.0132979
):0.0119681
):0.00964096
):0.255319
,
(
(
V82RF-AGCE01026522.1-trav:0.0306122
,
V18RF-CABD02105602.1-trav:0.0306122
):0.257619
,
(
(
(
(
V73RF-AJFE01069977.1-trav:0
,
V17RF-CABD02105602.1-trav:0
):0.00531915
,
V83RF-AACZ03097619.1-trav:0.00531915
):0.0172872
,
(
V73RF-JYKQ01054957.1-trav:0.018617
,
(
(
V139RF-AQIA01064151.1-trav:0
,
V205RF-AQIB01128642.1-trav:0
):0.00531915
,
V37RF-AHZZ01098200.1-trav:0.00531915
):0.0132979
):0.00398936
):0.204122
,
(
V200RF-JABR01098604.1-trav:0.043883
,
(
V62RF-ADFV01192035.1-trav:0.0239362
,
(
V57RF-AJFE01069975.1-trav:0.00531915
,
V68RF-AACZ03097613.1-trav:0.00531915
):0.018617
):0.0199468
):0.182846
):0.0615027
):0.00731385
):0.00687027
):-0.00086695
):0.00963897
):0.0148265
):0.0337831
):0.662103
,
(
(
V53RF-ABDC01388284.1-trav:0.104605
,
(
(
V50RF-ABDC01379531.1-trav:0
,
V93RF-ABDC01491653.1-trav:0
):0.0723684
,
(
V59RF-JZKE01143896.1-trav:0.0394737
,
(
V55RF-JZKE01143895.1-trav:0.0315789
,
V60RF-JZKE01143902.1-trav:0.0315789
):0.00789474
):0.0328947
):0.0322368
):0.0550776
,
(
(
V89RF-AGCE01026529.1-trav:0.0749178
,
(
(
V74RF-ADFV01192039.1-trav:0.0286458
,
(
V69RF-AJFE01069976.1-trav:0.015625
,
(
V79RF-AACZ03097619.1-trav:0.0104167
,
V14RF-CABD02105592.1-trav:0.0104167
):0.00520833
):0.0130208
):0.0153809
,
(
V128RF-ABGA01387833.1-trav:0.0540365
,
(
V187RF-JABR01098599.1-trav:0.0201823
,
(
V32RF-AHZZ01098200.1-trav:0.0195312
,
(
V68RF-JYKQ01054942.1-trav:0.0078125
,
(
(
V134RF-AQIA01064146.1-trav:0
,
V221RF-AQIB01128644.1-trav:0
):0.00520833
,
V215RF-AQIB01128644.1-trav:0.00520833
):0.00260417
):0.0117188
):0.000651043
):0.0338542
):-0.0100098
):0.0308911
):0.0755389
,
(
(
V95RF-AGCE01026531.1-trav:0.0375665
,
(
(
V59RF-JYKQ01054940.1-trav:0.0075
,
(
(
V125RF-AQIA01064144.1-trav:0
,
V196RF-JABR01098603.1-trav:0
):0.005
,
V86RF-AHZZ01198216.1-trav:0.005
):0.0025
):0.0197606
,
(
V147RF-ABGA01083939.1-trav:0.0172872
,
(
V65RF-ADFV01192037.1-trav:0.0132979
,
(
(
V61RF-AJFE01069975.1-trav:0
,
V71RF-AACZ03097613.1-trav:0
):0.00531915
,
V7RF-CABD02105584.1-trav:0.00531915
):0.00797872
):0.00398936
):0.0099734
):0.0103059
):0.103549
,
(
(
V69RF-ADFV01192038.1-trav:0.0302632
,
(
V74RF-AACZ03097614.1-trav:0.0131579
,
(
V64RF-AJFE01069975.1-trav:0.00526316
,
V10RF-CABD02105588.1-trav:0.00526316
):0.00789474
):0.0171053
):0.0576078
,
(
V93RF-AGCE01026530.1-trav:0.0724734
,
(
V189RF-JABR01098600.1-trav:0.0359043
,
(
V62RF-JYKQ01054942.1-trav:0.018617
,
(
V128RF-AQIA01064146.1-trav:0.0159574
,
V59RF-AHZZ01107544.1-trav:0.0159574
):0.00265957
):0.0172872
):0.0365692
):0.0153975
):0.0532447
):0.00934103
):0.0092262
):0.662103
):0.109346
)
;
