# Supplementary material for: Iterative Variable Gene Discovery from Whole Genome Sequencing with a Bootstrapped Multiresolution Algorithm
Source: Comput Math Methods Med. 2019 Feb 11;2019:3780245. doi: 10.1155/2019/3780245 (PMC6388353; doi:10.1155/2019/3780245)
Supplement: Supplementary Materials — supp_materialsV2.pdf: this is an updated document, which includes new figures requested by the reviewer. sequences_alignments.zip: these are genome sequence files that are relevant for reproducing some of the results. [file 3780245.f1.zip › 3780245.f1/sequences_alignments/trav_2.fasta]

>V121RF-AQIA01064137.1-trav |(37156, 37446)|2.98171202074|(0.994,1.000,0.988)|1
-MSRGEDVEQS-LFLSVREGDISVINCTYTDSS--S-TYLYWYKQEPGAGLQLLTYILSN
TD-LKQDQRLTVLLNKKDKHLSLCIADTQTEDSAIYFCAES-----
>V123RF-AQIA01064138.1-trav |(6177, 6471)|2.97409640489|(0.997,0.996,0.982)|1
-GINGDSVVQTEGQVLLSEGDSLIVNCSYESTQ--Y-PSLFWYVQYPGEGLQLLLKAMKF
ND-KESNKGFEATYRKETTSFHLEKDSVQESDSAVYFCALS-----
>V124RF-AQIA01064138.1-trav |(19410, 19703)|2.99799600001|(0.999,0.999,1.000)|1
-GSGKNQVEQSPQSLIILEGKNCTLQCNYTVSP--F-SNLRWYKQDTGKGPISLTIMTFS
EN-TKSNGRYTATLDADTKQSSLHITAAQLSDSASYICVVS-----
>V125RF-AQIA01064144.1-trav |(2574, 2880)|2.98061205453|(0.998,0.994,0.989)|1
VWSQQKEVEQDPGPFSVPEGATVTFNCTYSNSA--S-QSFFWYRQDSRKEPKLLMSVYSS
GN--E-DGRFTAQLNRASQYISLLIRDSQLSDSATYLCAVRTQCSP
>V126RF-AQIA01064144.1-trav |(8015, 8312)|2.71827160044|(0.991,0.847,0.963)|1
-GTRAQSVTQLDSQVSVSEGVPVLLRCNYSSSF--S-PYLFWYVQYPNQGLQLLLKYTSG
TTLVKGINGFEAEFKKSETSFHLTKASAHVSDAAEYFCAVN-----
>V127RF-AQIA01064146.1-trav |(4210, 4500)|2.98578801933|(0.997,0.999,0.990)|1
--VNGENVEQHPSTLSVQEGDSSVIKCTYSDSA--S-NYFPWYKQELGKGPQFIIDIRSN
AH-EKKNQRITVLLNKTAKHFSLHITETQPGDSAVYFCAAS-----
>V128RF-AQIA01064146.1-trav |(26731, 27019)|2.98270803341|(0.998,0.990,0.995)|1
VWSQQ-KVEQNSGPLNVPEGAIASLNCTYSDSG--S-QSFFWYRQYSGQSPELLMSTYSS
GD-KE-DGRFTAQLDRASQYVSLLIRDSQLSDSATYLCAV------
>V130RF-AQIA01064146.1-trav |(38786, 39083)|2.93996483513|(0.996,0.997,0.954)|1
-TARAQSVTQPDIHITVSEGASLELRCNYSYGA--T-PSLFWYVQSPGQGLQLLLKYFSG
DTVVQGIKGFEAEFKRSQYSFNLRKPSVHWSDAAEYFCAAG-----
>V131RF-AQIA01064146.1-trav |(52629, 52922)|2.91423800393|(0.999,0.998,0.934)|1
-VSRGESVGLHLPTVTVQEGDNSVINCTYSDSA--S-DYFLWYKQESGKGPQSIMDIRSN
MA-KRQGQRLTVLLNKTMKHLSLQIAATEPGDSAVYFCAEN-----
>V132RF-AQIA01064146.1-trav |(58513, 58814)|2.94950546622|(1.000,0.991,0.964)|1
-SGIAQKITQTQPAMFVQEKEAVTLDCTYDTSD--QNYGLFWYKQPSSGEMIFLILQMSY
DKQNATEGRYSLNFQKARKSVNLVISASQVGDSATYFCAMR-----
>V133RF-AQIA01064146.1-trav |(76833, 77127)|2.98742416586|(1.000,1.000,0.988)|1
-RTRGDSVTQMEGPVTLSERAFLTINCTYTATG--Y-PSLFWYVQYPGEGPQLLLKAAKT
DE-KGSNKGFEATYRKETTSFHLKKDSVQESDSAVYFCALS-----
>V134RF-AQIA01064146.1-trav |(101455, 101748)|3.0|(1.000,1.000,1.000)|1
VWSQQKEVEQNPGPLSVPEGATASLNCTYSNSA--F-QYFMWYRQYSRKGPQLLIYIYSS
GN-KE-DGRFTAQVDKSSKYISLFIRDSQPSDSATYFCAMS-----
>V136RF-AQIA01064148.1-trav |(10272, 10559)|2.99596000066|(1.000,0.999,0.997)|1
--VNSQQGEEDPQALSIQEGENATMNCSYKT-S--I-NNLQWYRQDSGRSLVQLVLIRSN
ER-EKNSGRLRVTLDTSKKSSSLLITASRAADTASYFCATD-----
>V137RF-AQIA01064149.1-trav |(7521, 7812)|2.95226014987|(0.978,0.989,0.986)|1
-RTNGDSVTQTEGPVTLPERAALTLNCTYQTSY--S-AFIFWYVQYPNKEPELLLKS-SE
NQ-ETNSRGFQASHVKSDSSFHLEKPSVQLSDSAVYYCVLR-----
>V138RF-AQIA01064149.1-trav |(10740, 11043)|2.91184034555|(0.979,0.968,0.966)|1
-SSMAQKVTQAQTEISVVEKEDVTLDCVYETRD--TTYYLFWYKQPPSGELVFLVRQNSF
DEQNEINGRYYSNFQKSTSSFNLTITASQVVDSAVYFCALNE----
>V139RF-AQIA01064151.1-trav |(18011, 18298)|2.94701938908|(0.996,0.990,0.965)|1
-LSGEDQVTQSPEALSLQEGESSSLNCSYTVSG--L-RGLFWYRQDPGKGPEFLFSLYSA
GE-EKEKERLKATLTKKE--SFLHITGPKPEDSATYLCAVQ-----
>V145RF-AQIA01064165.1-trav |(18360, 18659)|2.85167212368|(0.974,0.959,0.928)|1
--VNGQQIMQIPQYQHVQEGEDFTTYCNSST-T--L-SNIQWYKQRPGGHPVFLIMLVKS
GE-VKKQKRLTFQSGEAKKNSSLHITATQTTDVGTYFCAGHSAPQ-
>V151RF-AQIA01064166.1-trav |(145402, 145702)|2.9659815877|(0.999,0.978,0.991)|1
-SGMAQTVTQSQPEMSVQEAETVTLSCTYDTSD--SDYYLFWYKQPPSRQMILIIRQEAY
KQQNATENRFSVNFQKATKSFSLKISDSQLGDAAMYFCAYR-----
>V152RF-AQIA01064166.1-trav |(168980, 169268)|2.99496000066|(0.999,1.000,0.996)|1
-LSGELKVGQNPLFLSTQEGKNYTIYCNYSTAS----DRLYWYRQDPGKSLESLFVLLSN
GA-VKQEGRLMASLDTKARLSSLHITAALQDLSATYFCAV------
>V46RF-ABDC01377653.1-trav |(1660, 1950)|2.89429565252|(0.974,0.975,0.948)|1
-MSRGEKLEQS-PFLSVQEGDSSVINCTYTETT--S-TYFYWYKQGPREGLQLIMTIFSY
ED-KKQERRLSVLLNKMEKHLSLHISDTQPADSAVYFCAVS-----
>V49RF-ABDC01379531.1-trav |(895, 1198)|2.86994173299|(0.990,0.912,0.992)|1
-SGMAQKVTQSQPAMWVQEKEAVTLDCTYDTRD--STYYLFWYKQPSSGEMILLIRQDSY
NQQNATEGRYSLNFQKASKSIKLVISASQVGDSAIYFCALSE----
>V50RF-ABDC01379531.1-trav |(6655, 6946)|2.9758720041|(0.992,0.996,0.988)|1
VRSQQKEVDQTPEFLSVSEGAMASLNCTYSNTA--S-RYFFWYRQYSGKGPELLVSIFST
GD-KQ-EGRFTAQLNKASRYVSLVIRDSQPSDSATYLCAL------
>V53RF-ABDC01388284.1-trav |(3312, 3602)|2.85573926526|(0.964,0.911,0.996)|1
-VRSQQVVEQTPESLVVSEGTTASLSCTYSDTA--S-QSFLWYRQYSGKGPELLMFIYST
GD-KE-EGRFTAQLNKASRNVSLLIRDSQPSDSATYLCAVS-----
>V73RF-ABDC01418428.1-trav |(328, 621)|2.91992564019|(0.953,0.987,0.990)|1
-VRGGENVGLHPPTLSVQEGDTSVINCSYSDSA--S-SYLLWYKQKLGKSPQSIIDIRSN
MG-KKQKGRFTVFLSKTAKHLSLHIAATQPGDSAVYFCAES-----
>V93RF-ABDC01491653.1-trav |(356, 647)|2.9758720041|(0.992,0.996,0.988)|1
VRSQQKEVDQTPEFLSVSEGAMASLNCTYSNTA--S-RYFFWYRQYSGKGPELLVSIFST
GD-KQ-EGRFTAQLNKASRYVSLVIRDSQPSDSATYLCAL------
>V103RF-ABDC01533415.1-trav |(1221, 1515)|2.95496034001|(0.978,0.992,0.986)|1
-GTDGDSVTQTEGPVTLPEGEALTLNCTYQSNY--A-AFLFWYVQFQNKEPELLLKSSSE
TQ-ETDGRGFQANNNKSDSSFHLKKPSVQLSDSAVYFCAMR-----
>V104RF-ABDC01542818.1-trav |(328, 615)|2.87823134214|(0.967,0.933,0.984)|1
-VSSEDKVVQSPPSMAVHEGDSATLTCNYVVSY--F-RSLQWYKQEK-NAPVFLFTLTSS
GI-EKKSGRFSSILDNKEL-STLNITATQTGDSAIYFCAVE-----
>V132RF-ABDC01454736.1-trav |(1674, 1968)|2.93761652199|(0.971,0.986,0.982)|-1
-RTHGNSVTQTEGQVTLSEKAFLHINCTYTSTG--Y-PSLFWYVQYPGEGPQLLLKAATA
ND-KGMNKGFEATYKKETTSFHLEKASVHESDSAVYYCAMS-----
>V59RF-ADFV01192035.1-trav |(8555, 8856)|2.79105656836|(0.973,0.875,0.981)|1
-GLRAQLVAQPEDQVTVAEGNPLTVKCTYSVSG--N-PYLFWYVQYPNQGLQFLLKYIAG
DNLVKGSYGFEAEFNKSQTSFYLKKPSALVSDSALYFCAVRD----
>V60RF-ADFV01192035.1-trav |(53089, 53379)|2.9641161971|(0.988,0.978,0.999)|1
-MNRGEDVEQS-LFLGVREGDSSVINCTYTDSS--S-TYLYWYKQEPGAGLQLLTYIFSN
MD-LKQDQRLTVLLNKKDKHLSLRIADTQTGDSAIYFCAES-----
>V61RF-ADFV01192035.1-trav |(63802, 64090)|2.94342463332|(0.981,0.968,0.996)|1
--VKSQKIEQNSEALNIQEGKTATLTCNYTNYS--P-AYLLWYRQDPGRGPVFLLLIREN
EK-EKRKERLKVTFDTTLKQSLFHITASQPADSATYLCAL------
>V62RF-ADFV01192035.1-trav |(73447, 73734)|2.90389594724|(0.982,0.936,0.995)|1
-ANGEKQVEHSPHFLGSQQGDVASVSCMYSVSR--F-NNLQWYRQNTGMGPKHLLSMYSA
GY-EKQKGRLNATLLKNG--SSLYITAVQPEDSATYFCAVD-----
>V63RF-ADFV01192035.1-trav |(102005, 102299)|2.97195641525|(0.994,1.000,0.979)|1
-GINGDSVVQTEGQVLLSEGDSLIVNCSYETTQ--Y-PSLFWYVQYPGEGPQLLLKAMKA
ND-KGRNKGFEATYHKETTSFHLEKDSVQEADSAVYFCALS-----
>V64RF-ADFV01192037.1-trav |(3179, 3470)|2.88580286128|(0.976,0.928,0.992)|1
-GSCKNQVEQSPQSLIILEGKNCTLQCNYTVSP--F-NNLRWYKQDTGKGPVSLTIMTLS
EN-TKSNGRYTATLDADTKQSSLHITASQLSDSASYICVV------
>V65RF-ADFV01192037.1-trav |(20251, 20539)|2.95672492248|(0.994,0.966,1.000)|1
VWSQRKEVEQDPGPFNVPEGATVAFNCTYSNSV--S-QSFFWYRQDCRKEPKLLMSVYSS
GN--E-DGRFTAQLNRASQYIYLLIRDSQLSDSATYLCAV------
>V66RF-ADFV01192037.1-trav |(26000, 26297)|2.98061205453|(0.998,0.994,0.989)|1
-GTRAQSVTQLDSHVSVSEGTPVLLRCNYSSSY--S-PSLFWYVQYPNQGLQLLLKYTSG
TTLVKGINGFEAEFKKSETSFHLTKSSAHVSDAAEYFCAVS-----
>V67RF-ADFV01192037.1-trav |(31699, 31996)|2.61020997727|(0.983,0.835,0.902)|1
-TARAQSVTQPDIHITVSEGASLELRCNYSYGA--T-PSLFWYVQSPGRGLQLLLKYFSG
DTLVQGIKGFEAEFQRSQSSFNLRKPSVHWSDAAEYFCAVS-----
>V69RF-ADFV01192038.1-trav |(22028, 22319)|2.94428190752|(0.999,0.955,0.998)|1
VWSQQKEVEQNSGPLSDPEGAIASLNCTYSDRS--S-QSFFWYRQYSGKSPELITSIYSN
GD-KE-DGRFTAQLNKASQYVSLLIRDSQLSDSATYLCAV------
>V70RF-ADFV01192038.1-trav |(28540, 28837)|2.94271942965|(0.995,0.970,0.981)|1
-GTRAQSVTQLDSHVSVSEGTLVLLRCNYSSSV--S-PNLFWYVQYPNQGLQLLLKYISG
TTLVKGINGFEAEFKKSETSFHLTKPSAHVSDAAEYFCAVS-----
>V71RF-ADFV01192038.1-trav |(50418, 50711)|2.95626365316|(0.994,0.968,0.997)|1
-VSRGESVGLHLPTLSVQEGNNSVINCAYSDSA--S-DYFTWYKQESGKGPQFIIDIRSN
MD-KRQGQRVTVLLNKTVKHLSLQIAATQPGDSAVYFCAEN-----
>V72RF-ADFV01192039.1-trav |(5009, 5312)|2.96353206285|(0.989,0.980,0.995)|1
-PGIAQKIIQTQPAMFVQEKEAVTLDCTYDTSD--QSYGLFWYKQPSSGEMIFLISQASY
DKQNATEGRYSLNFQKARKSANLVISASQLGDSAKYFCAMRE----
>V73RF-ADFV01192039.1-trav |(24309, 24603)|2.97950008499|(0.995,0.985,1.000)|1
-RTHGDSVTQMEGPVTLSEEAFLTINCTYTATG--Y-PTLFWYVQYPGEGPQLLLKATRA
DD-KGSNKGFEATYRKETTSFHLEKDSVQESDSAVYFCALS-----
>V74RF-ADFV01192039.1-trav |(50026, 50319)|2.92460484445|(0.971,0.989,0.966)|1
VWCQQKEVEQNPGPLSVPEGAIASLNCTYSNSA--F-QYFMWYRQYSRKGPELLMYTYSS
GN-KE-DGRFTAQVDKSSKCISLFIRNSQPSDSATYLCAMS-----
>V76RF-ADFV01192039.1-trav |(82783, 83070)|2.89863412726|(0.990,0.932,0.990)|1
--VNSQQGEEDPQALTIQEGENATMNCSYKS-S--T-NSLQWYRQESGRGLVHLILIRSN
ER-EKHSGRLRVTLDTSKKSSSLLITASRAADTASYFCAME-----
>V77RF-ADFV01192039.1-trav |(88347, 88638)|2.96653206285|(0.994,0.985,0.988)|1
-RTNGDSVTQTEGPVTLPEQAALTLNCTYQSSY--S-TFLFWYVQYLNKAPELLLKS-SE
NQ-ETDSRGFQASHVKSDSSFHLEKPSVQLSDSAVYYCALR-----
>V86RF-ADFV01192042.1-trav |(56528, 56818)|2.89432022844|(0.969,0.970,0.956)|1
--TIIDAKTTQPTSMDCAEGRAANLPCNHSTIS--GNEYVYWYRQIHSQGPQYIIHGLKN
NA---TNEMASLIITEDRKSSTLILPHATLRDTAVYYCIVRV----
>V91RF-ADFV01192045.1-trav |(29460, 29750)|2.68118382946|(0.893,0.956,0.854)|1
-VSSEDKVVQSPLSLVVHEGDTVTLNCSYEVTN--F-RSLLWYKQEK-KAPTFLFMLTSS
GI-EKKSGRLSGILDNRELFSILNITATETRDSAIYLCAVE-----
>V93RF-ADFV01192049.1-trav |(9724, 10024)|2.95870048487|(0.995,0.980,0.985)|1
-FSMAQTVTQSQPEMSVQEAETVTLSCTYDTTE--SDYYLFWYKQPPSRQMILIIRQEAY
KQQNATENRFSVNFQKAAKSFSLKISDSQLGDTAMYFCAYR-----
>V94RF-ADFV01192050.1-trav |(14951, 15239)|2.92225114014|(0.980,0.950,0.997)|1
-LSGELKVGQNPPFLSTQEGKNYTIYCNYSTIS----DRLYWYRQDPGKSLESLFVLLSS
GA-VKQEGRLMASLDTKARLSTLHITAAVHDLSATYFCAV------
>V55RF-AJFE01069975.1-trav |(15309, 15599)|2.99498000014|(0.998,0.997,1.000)|1
-MTRGEDVEQS-LFLSVREGDSSVINCTYTDSS--S-TYLYWYKQEPGAGLQLLTYIFSN
MD-MKQDQRLTVLLNKKDKHLSLRIADTQTGDSAIYFCAES-----
>V56RF-AJFE01069975.1-trav |(34873, 35161)|2.98793200206|(0.995,0.999,0.994)|1
--VKSQKIEQNSEALNIQEGKTATLTCNYTNYS--P-AYLQWYRQDPGRGPVFLLLIREN
EK-EKRKERLKVTFDTTLKQGVFHITASQPADSATYLCAL------
>V57RF-AJFE01069975.1-trav |(49199, 49486)|2.95767605248|(0.983,0.983,0.992)|1
-ANGENQVEHSPHFLGPQQGDVASMSCTYSVSR--F-NNLQWYRQNTGMGPKHLLSMYSA
GY-EKQKGRLNAILLKNG--SSLYITAVQPEDSATYFCAVD-----
>V59RF-AJFE01069975.1-trav |(77622, 77916)|2.98657605748|(0.991,0.996,1.000)|1
-GINGDSVVQTEGQVLLSEGDSLIVNCSYETTQ--Y-PSLLWYVLYPGEGPQLLLKAMKA
ND-NGRNKGFEATYRKETTSFHLEKDSVQESDSAVYFCALS-----
>V60RF-AJFE01069975.1-trav |(91696, 91989)|2.98960803841|(0.992,0.999,0.999)|1
-GSGKNQVEQSPQSLIILEGKNCTLQCNYTVSP--F-NNLRWYKQDTGRGPVSLTIMTFS
EN-TKSNGRYTATLDADTKKSSLHITASQLSDSASYICVVS-----
>V61RF-AJFE01069975.1-trav |(107426, 107714)|2.99593600205|(1.000,0.996,1.000)|1
VWSQRKEVEQDPGPFNVPEGATVAFNCTYSNSA--S-QSFFWYRQDCRKEPKLLMSVYSS
GN--E-DGRFTAQLNRASQYISLLIRDSKLSDSATYLCAV------
>V62RF-AJFE01069975.1-trav |(118638, 118935)|2.95328751647|(1.000,0.980,0.977)|1
-TVRAQSVTQPDIHITVSEGASLELRCNYSYGA--T-PSLFWYVQSPGQGLQLLLKYFSG
DTLVQGIKGFEAEFKRSQSSFNLRKPSVHWSDAAEYFCAVG-----
>V63RF-AJFE01069975.1-trav |(134910, 135200)|2.97780401921|(0.995,0.995,0.988)|1
--VNGENVEQHPSTLSVQEGDGAVIKCTYSDSA--S-NYFPWYKQELGKGPQLIIDIRSN
MG-EKKDQRIAVTLNKTAKHFSLHITETQPEDSAVYFCAAS-----
>V64RF-AJFE01069975.1-trav |(154372, 154663)|2.99089600501|(0.999,0.998,0.994)|1
VWSQQKEVEQNSGPLSVPEGAIASLNCTYSDRR--S-QSFFWYRQYSGKSPELIMSIYSN
GD-EE-DGRFTAQLNKASQYVSLLIRDSQPSDSATYLCAV------
>V65RF-AJFE01069975.1-trav |(160863, 161160)|2.96496800026|(0.987,0.989,0.989)|1
-GTRAQSATQLDSHVSVSEGALVLLRCNYSSSV--P-PYLFWYVQYPNQGLQLLLKYTTG
ATLVKGINGFEAEFKKSETSFHLTKPSAHVNDAAEYFCAVS-----
>V66RF-AJFE01069976.1-trav |(18238, 18531)|2.98899600001|(0.996,0.996,0.997)|1
-VSRGESVGLHLPTLSVQEGDNSIINCAYSNSA--S-DYFIWYKQESGKGPQFIIDIRSN
MD-KRQGQRVTVLLNKTVKHLSLQIAATQPGDSAVYFCAEN-----
>V67RF-AJFE01069976.1-trav |(24122, 24425)|2.99289600501|(0.999,0.994,1.000)|1
-PGIAQKITQTQPGMFVQEKEAVTLDCTYDTSD--PSYGLFWYKQPSSGEMIFLIYQGSY
DQQNATEGRYSLNFQKARKSANLVISASQLGDSAMYFCAVRE----
>V68RF-AJFE01069976.1-trav |(40935, 41229)|3.0|(1.000,1.000,1.000)|1
-RTRGDSVTQMEGPVTLSEEAFLTINCTYTATG--Y-PSLFWYVQYPGEGLQLLLKATKA
DD-KGSNKGFEATYRKETTSFHLEKDSVQASDSAVYFCALS-----
>V69RF-AJFE01069976.1-trav |(65330, 65623)|2.98996000066|(0.996,0.999,0.995)|1
VWSQQKEVEQDPGPLSVPEGAIASLNCTYSNSA--F-QYFMWYRQYSRKGPELLMYTYSS
GN-KE-DGRFIAQVDTSSKYISLFIRDSQPSDSATYLCAMS-----
>V71RF-AJFE01069976.1-trav |(97788, 98075)|2.99385601037|(1.000,0.994,1.000)|1
--VNSQQGEEDPQALSIQEGENAIMNCSYKT-S--I-NNLQWYRQNSGRGLVHLILIRSN
ER-EKHSGRLRVTLDTSKKSSSLLITASRAADTASYFCATD-----
>V73RF-AJFE01069977.1-trav |(1078, 1365)|2.98696000066|(0.997,0.996,0.994)|1
-LSGEDQVTQSPEALRLQEGESSSLNCSYTVSG--L-RGLFWYRQDPGKGPEFLFTLYSA
GE-EKEKERLKATLTKKE--SFLHITAPKPEDSATYLCAVQ-----
>V87RF-AJFE01010527.1-trav |(11555, 11845)|2.79985773786|(0.969,0.891,0.964)|-1
-VSSILNVEQSPQSLHVQEGDSTNFTCSFPSSN--F-YALHWYRWETAKSPEALFVMTLN
GD-EKKTGRISATLNTKEGYSYLYIKGSQPEDSATYLCAF------
>V115RF-AJFE01024276.1-trav |(19317, 19607)|2.9889000027|(0.994,0.997,0.998)|-1
-VSSEDKVVQSPLSLVVHEGDTVTLNCSYEVTN--F-QSLLWYKQEK-KAPTFLFMLTSS
GI-EKKSGRLSSILDKKELFSILNITATQTGDSAIYLCAVE-----
>V116RF-AJFE01024276.1-trav |(73725, 74027)|2.99899200002|(0.999,1.000,1.000)|-1
-FSMAQTVTQSQPEMSVQEAETVTLSCTYDTSE--SDYYLFWYKQPPSRQMILVIRQEAY
KQQNATENRFSVNFQKAAKSFSLKISDSQLGDAAMYFCAYRS----
>V117RF-AJFE01024276.1-trav |(95666, 95954)|2.97440816598|(0.995,0.983,0.997)|-1
-LSGELKVEQSPLFLSTQEGKNYTIYCNYSTTS----DRLYWYRQDPGKSLESLFVLLSN
GA-VKQEGQLMASLDTKARLSTLHITAAVHDLSATYFCAV------
>V121RF-ABGA01386446.1-trav |(520, 807)|2.99899600001|(1.000,0.999,1.000)|1
--VNSQQGEEDPQALSIQEGENATMNCSYKT-S--I-NNLQWYRQNSGRGLVHLILIRSN
ER-EKHSGRLRVTLDTSKKSSSLLITASRAADTASYFCATD-----
>V122RF-ABGA01386446.1-trav |(6159, 6450)|2.92288400513|(0.972,0.977,0.974)|1
-RTNGDPVTQTEGPVTLPERAALTLNCTYQSSY--S-AFLFWYVQYLNKEPELLLRS-SE
NQ-ETDSRGFQASHVKSDSSFHLEKPSVQLSDSAVYYCVLR-----
>V126RF-ABGA01387831.1-trav |(4904, 5207)|2.91423069306|(0.979,0.943,0.999)|1
-PGIAQKITQTLPAMFVQEKEAVTLDCTYDTSD--QSYGLFWYKQPSSGEMILLIYQGSY
DKQNATEGRYSLNFQKARKSANLVISASQLGDSAMYFCAMKE----
>V127RF-ABGA01387833.1-trav |(6325, 6619)|2.92456585077|(0.956,0.989,0.988)|1
-RTHGDSVTQMEGPVTLSEEAFLTINCTYTATG--Y-PSLFWYVQYPGEGLQLLLKATKA
DD-KGSNKGFEATYHKETTSFHLEKDSVRESDSGVYFCALS-----
>V128RF-ABGA01387833.1-trav |(37695, 37988)|2.97296800026|(0.991,0.989,0.993)|1
VWCQQKEVEQNPGPLSVPEGAIASLNCTYSNSA--F-QYFMWYRQYSRKGPELLIYIYSS
GN-KQ-DGRFTAQVDTSGKYMSLFIRDSQPSDSATYLCAMS-----
>V141RF-ABGA01083932.1-trav |(371, 664)|2.92428751647|(0.977,0.954,0.997)|-1
-VSRGESVRPHLSTLGVQEGDNSVINCAYSDSA--S-DYFIWYKQESGKGPQFIIDIRSN
MD-KRQGQRVTVLLNKTVKHLSLQIAATQPGDSAVYFCAEN-----
>V142RF-ABGA01083934.1-trav |(495, 792)|2.94263026991|(0.992,0.984,0.969)|-1
-GTRAQSVTQLDSHVSVSEGALVLLRCNYSSSV--S-PYLFWYVQYPNQGLQLLLKYTSG
TTLVKGINGFEAEFKKSETSFHLTKPSAHVSDTAQYFCAVS-----
>V143RF-ABGA01083937.1-trav |(4214, 4504)|2.97988400513|(0.991,0.993,0.996)|-1
--VNGENVEQHPSTLSVQEGDSSVIKCTYSDSA--S-NYFPWYKQEVGKGPQFIIDIRSN
MG-EKKDQRITVILNKTAKHFSLHITETQPGDSAVYFCAAS-----
>V145RF-ABGA01083939.1-trav |(4457, 4751)|2.99696400065|(1.000,1.000,0.997)|-1
-GINGDSVVQTEGQVLLSEGDSLIVNCSYETTQ--Y-PSLFWYVQYPGEGPQLLLKAMKA
ND-KGRNKGFEATYRKETTSFHLEKDSVQESDSAVYFCALS-----
>V146RF-ABGA01083939.1-trav |(18067, 18360)|2.99696400065|(1.000,0.997,1.000)|-1
-GSGKNQVEQSPQSLIILEGKNCTLQCNYTVSP--F-SNLRWYKQDTGRGPVSLTIMTFS
EN-TKSNGRYTATLDADTKQSSLHITASQLSDSASYICVVS-----
>V147RF-ABGA01083939.1-trav |(34050, 34338)|2.9690773318|(1.000,0.980,0.991)|-1
VWSQQKEVEQDPGPFNVPEGATVAFNCTYSNSA--S-QSFFWYRQDCRKEPKLLMSVYSS
GN--E-NGRFTAQLNRASQYISLLIRDSQLSDSATYLCAV------
>V148RF-ABGA01083939.1-trav |(39521, 39818)|2.84875676613|(0.968,0.930,0.957)|-1
-GTRAQSVTQLDSHVPVSEGTRVLLRCNYSSSY--S-PSLFWYVQHPNQGLQLLLKYLSG
PTLVKGINGFEAEFKKSETSFHLTKSSAHVSDAAEYFCAMS-----
>V149RF-ABGA01113129.1-trav |(4972, 5260)|2.91558488932|(0.973,0.950,0.997)|-1
--VKSQKIEQNSEALNIQEGKTATLTCNYTNYS--P-TYLQWYRQDPGRGPVFLLLIREN
EK-EKRKERLKVSFDTTLKQSLFHITASQPADSATYFCAL------
>V150RF-ABGA01113130.1-trav |(6720, 7010)|2.97766002957|(0.997,0.990,0.991)|-1
-MSRGEDVEQT-LFLSVQEGDSSVINCTYTDSS--S-TYLYWYKQEPGAGLQLLTYIFSN
MD-LKQDQRLTVLLNKKDKHLSLRIADTQTGDSAIYFCAEH-----
>V151RF-ABGA01113133.1-trav |(15271, 15560)|2.86225977111|(0.978,0.924,0.972)|-1
-----QSVAQPEDEVTVAEGNPLTVKCTYSVSG--N-PYLFWYIQYPNEGLQFLLKYITG
DNLVKGSYGFEAEFNKSQTSFHLKKPSALVSDSALYFCAVRD----
>V224RF-ABGA01321068.1-trav |(6457, 6745)|2.97955704207|(1.000,0.981,1.000)|-1
-LSGELKVGQNPLFLSTQEGKNYTIYCNYSTTS----DRLYWYRQDPGKSLESLFVLLSN
GA-VKQEGRLMASLDTKARLSTLHITAAVHDLSATYFCAV------
>V225RF-ABGA01321070.1-trav |(796, 1096)|2.99496000066|(0.999,1.000,0.996)|-1
-FSMAQTVTQSQPEMSVQEAETVTLSCTYDTSE--SDYYLFWYKQPPSRQMILVIRQEAY
KQQNATENRFSVNFQKAAKSFSLKISDSQLGDAAMYFCAYR-----
>V3RF-AHZZ01035404.1-trav |(11684, 11986)|2.97323355494|(0.999,0.978,0.998)|1
-SGMAQTVTQSQPEMSVQEAETVTLSCTYDTSD--SDYYLFWYKQPPSRQMILIIRQEAY
KQQNATENRFSVNFQKAAKSFSLKISDSQLGDAAMYFCAYRS----
>V4RF-AHZZ01035404.1-trav |(35215, 35503)|2.96653206285|(0.990,0.981,0.996)|1
-LSGELKVGQNPLFLSTQEGKNYTIYCNYSTAS----NRLYWYRQDPGKSLESLFVLLSN
GA-VKQEGRLMASLDTKARLSSLHITAALQDLSATYFCAV------
>V32RF-AHZZ01098200.1-trav |(876, 1169)|2.98993600205|(0.998,0.994,0.998)|1
VWSQQKEVEQNPGPLSVPEGATASLNCTYSNSA--F-QNFMWYRQYSRKGPQLLIYTYSS
GN-KE-EGRFTAQVDKSSKYISLFIRDSQPSDSATYFCAMS-----
>V34RF-AHZZ01098200.1-trav |(35496, 35783)|2.9771523093|(0.996,1.000,0.982)|1
--VNSQQGEEDPQTLSIQEGENATMNCSYKT-S--I-NNLQWYRQDSGRSLVQLILICSN
ER-EKNSGRLRVTLDTSKKSSSLLITASRAADTASYFCATD-----
>V35RF-AHZZ01098200.1-trav |(47312, 47603)|2.80204466822|(0.921,0.928,0.959)|1
-RTNGDLVTQTEGPVTLPERAALTLNCTYQTSY--S-AFIFWYVQYPNKEPELLLKS-SE
NQ-ETNSRGFQASHDKSDSSFHLEKPSVQLSDSAVYYCVLR-----
>V36RF-AHZZ01098200.1-trav |(50539, 50842)|2.92360004313|(0.970,0.978,0.976)|1
-SSMAQKVTQAQTEISVVEKEDVTLDCVYETRE--NTYYLFWYKQPPSGELVFLIRRNSF
DEQNEMNGRYDSNFQKSTSSFNLTITASQVVDSAVYFCALNE----
>V37RF-AHZZ01098200.1-trav |(85982, 86269)|2.83564593441|(0.966,0.915,0.965)|1
-LSGEDQVMQSPEALSLQEGESSSLNCSYTVSG--L-RGLFWYRQDPGKGPEFLFSLYSA
GE-EKEKERLKATLTKKE--SFLHITGPKPEDSATYLCAVQ-----
>V58RF-AHZZ01107544.1-trav |(5301, 5591)|2.98780001921|(0.998,0.999,0.991)|1
--VNGENVEQHPSTLSVQEGDSSVIKCTYSDSA--S-NYFPWYKQELGKGPQFIIDIRSN
EH-EKKDQRITVLLNKTAKHFSLHITETQPGDSAVYFCAAS-----
>V59RF-AHZZ01107544.1-trav |(27803, 28091)|2.97560803841|(0.992,0.985,0.999)|1
VWSQQ-KVEQSSGPLSVPEGAIASLNCTYSDSG--S-QSFFWYRQYSGQSPELLMSTYSS
GD-KE-DGRFTAQLNRASQYVSLLIRDSQLSDSATYLCAV------
>V61RF-AHZZ01107544.1-trav |(53747, 54040)|2.99393200206|(0.999,1.000,0.995)|1
-VSRGESVGLHLPTVSVQEGDNSVINCTYSDSA--S-DYFLWYKQESGKGPQSIIDIRSN
MA-KRQGQRLTVLLNKTMKHLSLQIAATEPGDSAVYFCAEN-----
>V62RF-AHZZ01107545.1-trav |(4983, 5284)|2.94957605748|(0.982,0.991,0.977)|1
-SGIAQKITQTQPAMFVQEKEAVTLDCTYDTSD--QNYGLFWYKQPSSGEMIFLILQMSY
DKQNATEGHYSLNFQKARKSVNLVISASQVGDSATYFCAMR-----
>V63RF-AHZZ01107545.1-trav |(23299, 23593)|2.99593600205|(1.000,1.000,0.996)|1
-RTRGDSVTQMEGPVTLSERAFLTINCTYTATG--Y-PSLFWYVQYPGEGPQLLLKATKT
DE-KGSNKGFEATYRKETTSFHLKKDSVQESDSAVYFCALS-----
>V83RF-AHZZ01198213.1-trav |(10234, 10524)|2.9793601679|(0.996,1.000,0.984)|1
-MSRGEDVEQS-LFLSVREGDISVINCTYTDSS--S-TYLYWYKQEPGAGLQLLTYILSN
MD-LKRDQRVTVLLNKKDKHLSLRIADTQTEDSAIYFCAES-----
>V85RF-AHZZ01198214.1-trav |(53657, 53950)|2.99799600001|(0.999,0.999,1.000)|1
-GSGKNQVEQSPQSLIILEGKNCTLQCNYTVSP--F-SNLRWYKQDTGKGPISLTIMTFS
EN-TKSNGRYTATLDADTKQSSLHITAAQLSDSASYICVVS-----
>V86RF-AHZZ01198216.1-trav |(1076, 1382)|2.98128017622|(1.000,0.994,0.988)|1
VWSQQKEVEQDPGPFSVPEGATVTFNCTYSNSA--S-QSFFWYRQDSRKEPKLLMSVYSS
GN--E-DGRFTAQLNRASQYISLLIRDSQLSDSATYLCAVYTQCSP
>V87RF-AHZZ01198216.1-trav |(6535, 6832)|2.72737229451|(0.995,0.852,0.963)|1
-GTRAQSVTQLDSQVSVSEGVPVLLRCNYSSSV--S-PYLFWYVQYPNQGLQLLLKYTSG
TTLVKGINGFEAEFKKSETSFHLTKASAHVSDAAEYFCAVN-----
>V207RF-AHZZ01093946.1-trav |(12355, 12645)|2.89173090506|(0.963,0.946,0.986)|-1
-VSSEDKVMQNPLSLVVHEGDTVTLNCSYEVVN--F-QSLLWYKQEK-KAPTFLFTLTSS
GI-EKKSGRLSSILDKKDFFSILNITATQTRDSAVYLCAVE-----
>V208RF-AHZZ01093949.1-trav |(3892, 4191)|2.8006249066|(0.967,0.972,0.887)|-1
--VNGQQIMQIPQYQHVQEGEDFTTYCNSST-T--L-NNIQWYKQRPGGHPVFLIMLVKS
GE-VKKQKRLTFQFGEAKKNSSLHITATQTTDVGSYFCAGHSAPQ-
>V93RF-JABR01039937.1-trav |(16162, 16450)|2.94170803341|(0.979,0.987,0.976)|-1
-LSGELKVGQNPLFLSTQEGRNYTVYCNYSTAS----DRLYWYRQNPGKSLESLFVLLSN
GA-VKQEGRLMASLDTKARLSTLYITAALQDLSATYFCAV------
>V171RF-JABR01098590.1-trav |(5160, 5460)|2.93418588966|(0.996,0.973,0.970)|-1
-FSMAQTVTQSQPEMSVQEAETVTLSCTYDTSD--SDYYLFWYKQPPSRQMILIIRQEAY
KQQNATENRFSVNFQKAAKSFSLKISDSQLGDAAGYFCAYR-----
>V184RF-JABR01098598.1-trav |(19033, 19320)|2.97170402421|(0.990,0.985,0.997)|-1
--VNSQQGEEDPQALSIQEGENATMNCSYKT-S--I-DNLQWYRQDSGRSLVRLILIRSN
ER-EKSSGRLRVTLDTSKKSSSLLITASRAADTASYFCATD-----
>V185RF-JABR01098598.1-trav |(25184, 25475)|2.9410935653|(0.986,0.992,0.965)|-1
-RTNGDSVTQTEGPVTLPERAALTLNCTYQTSY--S-AFMFWYVQYLNKEPELLLKS-SE
NQ-ETDSRGFQASHVKSDSSFHLEKLSVQLSDSAVYYCVLR-----
>V186RF-JABR01098598.1-trav |(28683, 28986)|2.77047195752|(0.949,0.907,0.924)|-1
-SSMAQKVTQAQTEISVVEKEDVNLDCVYETRD--STYYLFWYKQPPSGELIFLIRQNSF
NEQNEINGRYSSNFQKSTSSFNLTITASQVVDSAVYFCALNE----
>V187RF-JABR01098599.1-trav |(7776, 8069)|2.97864005313|(0.995,0.986,0.998)|-1
VWSQQKEVEQNPGPLSVPEGATASLNCTYSNSA--F-QYFMWYKQYSRKGPQLLIYTYSS
GD-KE-DGRFTAQVDKSSKYISLFIRDSQPSDSATYFCAMS-----
>V189RF-JABR01098600.1-trav |(14202, 14490)|2.92580593785|(0.960,0.976,0.996)|-1
VWSQQ-KVEQNSGSLSVPEGAIASLNCTYSDRG--S-QSFLWYRQYSGQSPELLISTYSS
GD-KE-DGRFTAQLNKASQYVSLLIRDSQLSDSATYLCVV------
>V190RF-JABR01098600.1-trav |(20988, 21285)|2.63391777149|(0.990,0.830,0.927)|-1
-GTRAQSVTQLDSQVSVSEGVPVLLRCNYSSSF--S-PSLFWYVQYPNQGLQLLLKYISG
TALVKGINGFEAEFKKSETTFHLTKASAHVSDAAEYFCAVS-----
>V191RF-JABR01098600.1-trav |(26541, 26838)|2.97536527997|(1.000,0.997,0.980)|-1
-TARAQSVTQPDIHITVSEGASLELRCNYSYGA--T-PSLFWYVQSPGQGLQLLLKYFSG
DTLVQGIKGFEAEFKRSQYSFNLRKPSVHWSDAAEYFCAAG-----
>V192RF-JABR01098600.1-trav |(40729, 41022)|2.91269832585|(0.995,0.959,0.967)|-1
-VSRGESVGLHLPTVSVQEGDNSVINCTYSDSV--S-DYFLWYKQESGKGPQFIIDIRSN
MA-KRQGQRLTVLLNKTVKHLSLQIAATEPGDSAVYFCAEN-----
>V193RF-JABR01098600.1-trav |(52617, 52918)|2.75126597494|(0.948,0.861,0.975)|-1
-SGIAQKITQTQPAMFMQEKEAVTLDCTYDTSD--QNYGLFWYKQPSSGEMIFLIHQESY
DKQNATEGRYSLNFQKARKSINLIISASQVGDSAMYFCAMR-----
>V195RF-JABR01098601.1-trav |(15930, 16220)|2.98286400565|(0.997,0.992,0.994)|-1
--VNGENVEQHPSILSVQEGDSSVIKCTYSDSA--S-NYFPWYKQELGKGPQLIIDIRSN
VH-EKKDQRITVLLNKTAKHFSLHITETQPGDSAVYFCAAS-----
>V196RF-JABR01098603.1-trav |(9193, 9499)|2.98061205453|(0.998,0.994,0.989)|-1
VWSQQKEVEQDPGPFSVPEGATVTFNCTYSNSA--S-QSFFWYRQDSRKEPKLLMSVYSS
GN--E-DGRFTAQLNRASQYISLLIRDSQLSDSATYLCAVRTQCSP
>V198RF-JABR01098604.1-trav |(11404, 11694)|2.99593600205|(1.000,1.000,0.996)|-1
-MSRGEDVEQS-LFLSVREGDISVINCTYTDSS--S-TYLYWYKQEPGAGLQLLTYILSN
TD-LKQDQRLTVLLNKKDKHLSLRIADTQTGDSAIYFCAES-----
>V200RF-JABR01098604.1-trav |(37115, 37402)|2.87236078502|(0.956,0.945,0.973)|-1
-ANGENQVEQSPRFLGPQQGDVAFMSCMYSVSR--F-NNLQWYRQNTGTGPKHLFSMYSA
GY-EKQKGRLNATLLKNG--SSLYITAMQPEDSATYFCAVD-----
>V201RF-JABR01098604.1-trav |(64438, 64732)|2.98080001|(0.997,0.992,0.992)|-1
-EINGDSVVQTEGQVLLSEGDSLIVNCSYESTQ--Y-PSLFWYVQYPGEGPQLLLKAMMA
ND-KESNKGFEATYHKETTSFHLKKDSVQESDSAVYFCALS-----
>V202RF-JABR01098604.1-trav |(77658, 77951)|2.94571942965|(0.970,0.995,0.984)|-1
-GSGKNQVEQSPQSLIILEGKNCTLQCNYTVSP--F-NNLRWYKQDTGKGPISLTIMTFS
EN-TKLNGRYTATLDADTKQSSLHITATQLSDSASYICVVS-----
>V35RF-JZKE01143868.1-trav |(15192, 15493)|2.8790773318|(0.970,0.950,0.961)|-1
-SSVAQTVTQSQPEMSVQEAGTVTLDCTYATSD--SNYYLFWYKQPPSRQMILIIRQEAY
KQQNATENRFSVNFQKAAKSFSLEISDSQLEDAAMYFCAFM-----
>V37RF-JZKE01143869.1-trav |(6274, 6564)|2.90623355494|(0.962,0.983,0.963)|-1
-VSSEDKVIQSPSSLAVHEGDSATLTCNYEVSY--F-QSLQWYKQEK-NAPTFLFTLTSS
GI-EKKSGRLSSILDNKELLSTLNITATQTRDSAIYFCAVE-----
>V49RF-JZKE01143890.1-trav |(1103, 1400)|2.97167205249|(0.988,0.997,0.987)|-1
-RSNGDSVTQTEGTVTLPEGAPVILNCTYETTY--SVSYLFWYVQYLNQSPQLLLKSSTE
NQ-RGENRGFQANLVKSDKSFHLEKSSLRMSDSAVYYCALS-----
>V51RF-JZKE01143891.1-trav |(8677, 8980)|2.92950687711|(0.963,0.978,0.993)|-1
-PSMAQKVTQAQPEISVVEKESVTLDCVYETRD--PTYYLFWYKQPPSGEMIFLIRQDSF
NEKNETKDRYFLNLQKSTSSISLTITASQLMDSAVYFCALRE----
>V52RF-JZKE01143893.1-trav |(6613, 6900)|2.87529565252|(0.951,0.977,0.950)|-1
--VNSQQGEENPQALSIQEGENATINCSYKS-S--I-SNLQWYRQDSGRGLTLLILIRAN
KR-EEHHGRLTVTLNTSIKSSSLIITASCAADSATYFCATD-----
>V53RF-JZKE01143895.1-trav |(12286, 12579)|2.6372974615|(0.936,0.795,0.998)|-1
-VSGGENVGLHPPTLNVQEGDTSVINCTYSNSA--S-NYFPWYKQELGKGPQFIIDIRSN
MD-NKQEQRFTVLLNKTAKHLSLHIAGTQAGDSAVYFCAES-----
>V54RF-JZKE01143895.1-trav |(15624, 15933)|2.96508440501|(0.993,0.978,0.995)|-1
-AGIAQKVTQSQPAMSVQEKEAVTLDCTYDTSTSVTSYTLFWYKQPSSGEMILLIRQDSY
NQQNATEGRYSLNFQKASKSIKLVISASQVGDSAIYFCALSE----
>V55RF-JZKE01143895.1-trav |(22481, 22772)|2.96576801985|(0.990,0.993,0.983)|-1
VRSQQKEVEQTPESLSVSEGATASLNCTYSNTA--S-QYFTWYRQYSGKGPELLVSIYSN
GD-KEE-ERFTVHLNMASRYVSLLIRDSQPSDSATYLCAV------
>V57RF-JZKE01143896.1-trav |(1244, 1537)|2.9032417319|(0.956,0.966,0.985)|-1
-VRGGENMGLHPPNLSVQEGDTSVINCTYSNSN--S-DYFCWYKQEPGKGPQFIMDIRSN
KD-KKQEGRFTILLNKMAKHLSLHIAGTQAGDSAAYLCAES-----
>V58RF-JZKE01143896.1-trav |(8327, 8630)|2.95010320239|(0.996,0.971,0.986)|-1
-SGIAQKVTQVQPAMLVQEKEAVTLDCTYDTSD--SRYTLFWYKQPSSGEMLLLIRQDSY
NQQNATEGRYSLNFQKANKSIKLVISASQVGDSAIYFCALME----
>V59RF-JZKE01143896.1-trav |(15626, 15938)|2.90973070067|(0.977,0.990,0.947)|-1
VRSQQKEVEQTPESLSVSEGATASLNCTYSNTA--S-QYFAWYRQYSGKGPELPVSIYST
GD-KEEEGRFTVQLNKGSRYVSLLIRDSQPSDSATYLCAVSTQCSP
>V60RF-JZKE01143902.1-trav |(453, 744)|2.97250008499|(0.996,0.986,0.991)|-1
VRSQQKEVEQTPESLSVSEGATASLNCTYSNTA--S-QYFAWYRQYSGKGPELLVFIYST
GD-KEE-GRFTVQLNKASRYVSLLIRDSQPSDSATYLCAV------
>V61RF-JZKE01143903.1-trav |(641, 935)|2.95570083945|(0.980,0.998,0.979)|-1
-RTHGDSVTQMEGQVTLSEEAFLTINCTYTATG--Y-PALFWYVQYPGEGPQLLLKATKA
ND-KGINKGFEATYKRETTSFHLEKASVHESDSAVYYCALS-----
>V62RF-JZKE01143910.1-trav |(6899, 7192)|2.80023317448|(0.933,0.897,0.987)|-1
-VSGKNQVEQGPQSLIIPEGENCTLQCNYTVSP--F-NNLRWYKQETGRGPVSLIIMNYS
KS-KESNGRYTATLDASAKQSSLHITASQLSDSASYICVAS-----
>V65RF-JZKE01143910.1-trav |(57835, 58138)|2.95677645736|(0.988,0.973,0.997)|-1
-AGVAQKVTQSQPAMLVQEKEAVTLDCTYDTSD--SSYGLFWYKQPSSGEMLLLIRQDSY
NQQNATEGRYSLNFQKARKSIHLVISALQLGDSAIYFCALSE----
>V68RF-JZKE01143915.1-trav |(12659, 12952)|2.87947106565|(0.941,0.970,0.977)|-1
-VSRGENVEQRPSTLHVQEGDTSVINCTYSDSA--S-SYFPWYKQELGKGPQLFIDIRSN
LD-KKQDQRITLLLNRMTKHLSLHIAATQPGDSAVYFCVAS-----
>V73RF-JZKE01143916.1-trav |(38882, 39172)|2.884671556|(0.989,0.936,0.972)|-1
-ISRGEKVEQS-PFLSVQEGDSSVINCTYTEST--S-TYFYWYKQGPGEGPQLLMTILSS
MD-KKQEQRLSVLLNKREKHLSLHISDTQPGDSAVYFCAVS-----
>V74RF-JZKE01143916.1-trav |(40477, 40765)|2.88564084149|(0.955,0.959,0.973)|-1
--VNSQKIEQNPRALNIHEGETAAVTCNYTSYS--P-AFLQWYRQDPERGLVFLLLIREN
EG-EKQEGRLKVTFDTTHKQSSFYITDSQPADSATYLCAA------
>V75RF-JZKE01143916.1-trav |(59581, 59872)|2.95679201242|(0.985,0.991,0.981)|-1
--SHGDSVTQTDGQMLLTEGDSLIVNCSYETRQ--Y-PALFWYVQYPGEGLQLLLKAAKA
ND-KGINKGFEATYNRETTSFHLEKASVHVSDSAVYYCALS-----
>V82RF-AGCE01026522.1-trav |(15303, 15602)|2.81669575519|(0.955,0.889,0.997)|-1
-VSSKQEVTQIPAALSVPEGESLVFNCSFTDSA--I-YYLQWFRQDPGKGLTSLLLIQSS
QR-EQTSGRLNASLDKSSRYSTLHIAASQPGDSATYLCAVRHS---
>V86RF-AGCE01026527.1-trav |(1820, 2116)|2.88284034555|(0.962,0.973,0.949)|-1
--VNSQQGEEEPQTLSIQEGENAIINCSYKT-S--I-TSLQWYRQDSNRGLTQLILIRSN
ER-EKHSGRLRFMLDTSMKSSSLFIAAAQAADTAAYFCATEAQC--
>V87RF-AGCE01026527.1-trav |(7054, 7345)|2.90853117661|(0.995,0.977,0.947)|-1
-RTYGDSVTQTEGPVTLPEGAALTLNCTYQSSY--S-VFLFWYVQYLDKEPQLLLKS-SE
NQ-ETDSRGFQASHVKSDSSFRLEKPSVQLSDSAVYYCALR-----
>V89RF-AGCE01026529.1-trav |(3178, 3469)|2.86106460747|(0.972,0.915,0.988)|-1
VWSQQKEVEQNPGSLSVPEGAIASLSCTYSNRA--F-QYFMWYRQYSRKGPELLTFIYSS
DK-KE-DGRFTAQLNKSSQYISLFIRDSQPSDSATYLCAM------
>V91RF-AGCE01026530.1-trav |(8602, 8899)|2.88894535923|(0.985,0.969,0.943)|-1
-DARAQSVTQPDIHITVSEGASLELRCNYSYGA--T-PYLFWYVQSPGQGLQLLLRYFSG
DTLVQGIKGFEAEFKRSQSSFNLRKPSVHWSDAAEYFCAVS-----
>V92RF-AGCE01026530.1-trav |(21106, 21396)|2.835463541|(0.920,0.956,0.978)|-1
--VNGENVEQHPSTLSVQVGDSSVINCTYSDSA--S-NYFPWYKQELGKGPRLIIDIRSN
VD-KRKDGRMTVLLNKAAKHFSLHITDTQPGDSALYFCAAG-----
>V93RF-AGCE01026530.1-trav |(40762, 41065)|2.9100682612|(0.972,0.959,0.980)|-1
VWSQQ-KVEQNSGPLNVPEGVIASLNCTYSDRG--S-QSFYWYRQYPGKSPELLMSVYSS
GN--E-DGRFTAQLNRASQYVSLLIRDSQLSDSATYLCAVSTRCSP
>V95RF-AGCE01026531.1-trav |(478, 766)|2.9651161971|(0.989,0.978,0.999)|-1
VWSQQKEVEQDPGPFNVPEGTTVAFNCTYSNSA--S-QYFFWYRQDPRKGPKLLMSVYSS
GN--E-DGRFTAQLNRASQYVSLLIRDSQLSDSATYLCAV------
>V97RF-AGCE01026534.1-trav |(23755, 24045)|2.96304239695|(0.976,0.998,0.992)|-1
-MSSGEDVEQS-RFLSVQEGDSVVMNCTYTDSS--S-SYLYWYKQEPGASLQLLAYILSN
TD-MKQDQRLTVQLDKKNKHLSLHVAEAQTGDSAIYFCAES-----
>V98RF-AGCE01026534.1-trav |(44840, 45134)|2.63746130221|(0.837,0.942,0.966)|-1
-GISGDSVVQTEGEVLLSEGDSLTVNCSYESTG--Y-PSLFWYVQYPGKGPELLLKATKG
ND-KGSNKDFEAIYRTETTSFHLEKGSVRESDSAVYFCALS-----
>V56RF-AACZ03095312.1-trav |(40528, 40815)|2.77072055687|(0.932,0.924,0.916)|1
--VRSQQPVQSPQAVILREGEDAVINCSSSK-A--L-YSVHWYRQKHGEAPVFLMMLLKG
GE-QKGHDKISASFNEKKQQSSLYLMASQLSYSGTYFCGAE-----
>V58RF-AACZ03095314.1-trav |(457, 747)|2.9889000027|(0.994,0.997,0.998)|1
-VSSEDKVVQSPLSLVVHEGDTVTLNCSYEVTN--F-QSLLWYKQEK-KAPTFLFMLTSS
GI-EKKSGRLSSILDKKELFSILNITATQTGDSAIYLCAVE-----
>V60RF-AACZ03095317.1-trav |(36941, 37243)|2.989900005|(0.995,0.995,1.000)|1
-FSMAQTVTQTQPEMSVQEAETVTLSCTYDTSE--SDYYLFWYKQPPSRQMILVIRQEAY
KQQNATENRFSVNFQKAAKSFSLKISDSQLGDAAMYFCAYRS----
>V61RF-AACZ03095319.1-trav |(17030, 17318)|2.97821230726|(0.998,0.984,0.997)|1
-LSGELKVEQNPLFLSTQEGKNYTIYCNYSTTS----DRLYWYRQDPGKSLESLFVLLSN
GA-VKQEGQLMASLDTKARLSTLHITAAVHDLSATYFCAV------
>V66RF-AACZ03097612.1-trav |(9441, 9731)|2.99899600001|(1.000,0.999,1.000)|1
-MSRGEDVEQS-LFLSVREGDSSVINCTYTDSS--S-TYLYWYKQEPGAGLQLLTYIFSN
MD-MKQDQRLTVLLNKKDKHLSLRIADTQTGDSAIYFCAES-----
>V67RF-AACZ03097613.1-trav |(2901, 3189)|2.98793200206|(0.995,0.999,0.994)|1
--VKSQKIEQNSEALNIQEGKTATLTCNYTNYS--P-AYLQWYRQDPGRGPVFLLLIREN
EK-EKRKERLKVTFDTTLKQGVFHITASQPADSATYLCAL------
>V68RF-AACZ03097613.1-trav |(17275, 17562)|2.96868003481|(0.991,0.983,0.995)|1
-ANGENQVEHSPHFLGPQQGDVASMSCTYSVSR--F-NNLQWYRQNTGMGPKHLLSMYSA
GY-EKQKGRLNATLLKNG--SSLYITAVQPEDSATYFCAVD-----
>V69RF-AACZ03097613.1-trav |(45730, 46024)|2.9949000027|(0.996,0.999,1.000)|1
-GINGDSVVQTEGQVLLSEGDSLIVNCSYETTQ--Y-PSLLWYVQYPGEGPQLLLKAMKA
ND-NGRNKGFEATYRKETTSFHLEKDSVQESDSAVYFCALS-----
>V70RF-AACZ03097613.1-trav |(59820, 60113)|2.99899600001|(1.000,0.999,1.000)|1
-GSGKNQVEQSPQSLIILEGKNCTLQCNYTVSP--F-NNLRWYKQDTGRGPVSLTIMTFS
EN-TKSNGRYTATLDADTKQSSLHITASQLSDSASYICVVS-----
>V71RF-AACZ03097613.1-trav |(75553, 75841)|2.99593600205|(1.000,0.996,1.000)|1
VWSQRKEVEQDPGPFNVPEGATVAFNCTYSNSA--S-QSFFWYRQDCRKEPKLLMSVYSS
GN--E-DGRFTAQLNRASQYISLLIRDSKLSDSATYLCAV------
>V72RF-AACZ03097613.1-trav |(86767, 87064)|2.95328751647|(1.000,0.980,0.977)|1
-TVRAQSVTQPDIHITVSEGASLELRCNYSYGA--T-PSLFWYVQSPGQGLQLLLKYFSG
DTLVQGIKGFEAEFKRSQSSFNLRKPSVHWSDAAEYFCAVG-----
>V73RF-AACZ03097614.1-trav |(12294, 12584)|2.96080866856|(0.992,0.995,0.975)|1
--VNGENVEQHPSTLSVQEGDGAVIKCTYSDSA--S-NYFPWYKQELGKGPQLIIDIHSN
MG-EKKDQRIAVTLNKTAKHFSLHITETQPEDSAVYFCAAS-----
>V74RF-AACZ03097614.1-trav |(31772, 32063)|2.96876801985|(0.993,0.990,0.986)|1
VWSQQKEVEQNSGPLSVPEGAIVSLNCTYSDRR--S-QSFFWYRQYSGKSPELIMSIYSN
GD-EE-DGKFTAQLNKASQYVSLLIRDSQPSDSATYLCAV------
>V75RF-AACZ03097614.1-trav |(38270, 38567)|2.96496800026|(0.987,0.989,0.989)|1
-GTRAQSATQLDSHVSVSEGALVLLRCNYSSSV--P-PYLFWYVQYPNQGLQLLLKYTTG
ATLVKGINGFEAEFKKSETSFHLTKPSAHVNDAAEYFCAVS-----
>V77RF-AACZ03097618.1-trav |(4827, 5130)|2.99798400013|(1.000,0.998,1.000)|1
-PGIAQKITQTQPGMFVQEKEAVTLDCTYDTSD--QSYGLFWYKQPSSGEMIFLIYQGSY
DQQNATEGRYSLNFQKARKSANLVISASQLGDSAMYFCAMKE----
>V78RF-AACZ03097618.1-trav |(21644, 21938)|3.0|(1.000,1.000,1.000)|1
-RTRGDSVTQMEGPVTLSEEAFLTINCTYTATG--Y-PSLFWYVQYPGEGLQLLLKATKA
DD-KGSNKGFEATYRKETTSFHLEKDSVQASDSAVYFCALS-----
>V79RF-AACZ03097619.1-trav |(24003, 24296)|2.99071202074|(0.993,0.999,0.999)|1
VWSQQKEVEQDPGPLSVPEGAIASLNCTYSNSA--F-QYFMWYRQYSRKGPELLMYTYSS
DN-KE-DGRFTAQVDKSSKYISLFIRDSQPSDSATYLCAMS-----
>V81RF-AACZ03097619.1-trav |(56042, 56329)|2.99385601037|(1.000,0.994,1.000)|1
--VNSQQGEEDPQALSIQEGENAIMNCSYKT-S--I-NNLQWYRQNSGRGLVHLILIRSN
ER-EKHSGRLRVTLDTSKKSSSLLITASRAADTASYFCATD-----
>V83RF-AACZ03097619.1-trav |(99749, 100036)|2.93226990764|(0.994,0.996,0.950)|1
-LSGEDQVTQSPEALRLQEGESSSLNCSYTVSG--L-RGLFWYRQDPGKGPEFLFALYSA
GE-EKEKERLKATLTKKE--SFLHITAPKPEDSATYLCAVQ-----
>V167RF-AACZ03171395.1-trav |(594, 882)|2.98793200206|(0.995,0.999,0.994)|1
--VKSQKIEQNSEALNIQEGKTATLTCNYTNYS--P-AYLQWYRQDPGRGPVFLLLIREN
EK-EKRKERLKVTFDTTLKQGVFHITASQPADSATYLCAL------
>V201RF-AACZ03171149.1-trav |(1638, 1925)|2.97478801933|(0.990,0.997,0.988)|-1
-VSSEDKVVQSPLSLVVHEGDTVTLNCSYEVTN--F-QSLLWYKQEK-KAPTFLFMLTSS
GI-EKKSGRLSSILDKKELFSILNT-ATQTGDSAIYLCAVE-----
>V202RF-AACZ03171512.1-trav |(590, 893)|2.99289600501|(0.999,0.994,1.000)|-1
-PGIAQKITQTQPGMFVQEKEAVTLDCTYDTSD--PSYGLFWYKQPSSGEMIFLIYQGSY
DQQNATEGRYSLNFQKARKSANLVISASQLGDSAMYFCAVRE----
>V3RF-CABD02105570.1-trav |(17984, 18274)|2.93192000218|(0.978,0.980,0.974)|1
-MSRGEDVEQS-LFLSVQEGDSSIIKCTYTDSS--S-TYLYWYKQEPGAGLQLLMYIFSN
MD-MKQDQRLTVLLNKKDKHLSLRIADTQTGDSAIYFCAES-----
>V5RF-CABD02105579.1-trav |(4709, 5003)|2.99385601037|(1.000,1.000,0.994)|1
-GINGDSVVQTEGQVLLSEGDSLIVNCSYETTQ--Y-PSLFWYVQYPGEGPQLLLKAMKA
ND-KGRNKGFEATYHKETTSFHLEKDSVQESDSAVYFCALS-----
>V6RF-CABD02105581.1-trav |(5845, 6138)|2.83117465195|(0.989,0.885,1.000)|1
-GSGKNQVEQSPQSLIILEGKNCTLRCNYTVSP--F-NNLRWYKQDTGRGPVSLTIMTFS
EN-TKSNGRYTATLDADTKQSSLHITASQLSDSASYICVVS-----
>V7RF-CABD02105584.1-trav |(2822, 3110)|2.99593600205|(1.000,0.996,1.000)|1
VWSQRKEVEQDPGPFNVPEGATVAFNCTYSNSA--S-QSFFWYRQDCRKEPKLLMSVYSS
GN--E-DGRFTAQLNRASQYISLLIRDSQLSDSATYLCAV------
>V8RF-CABD02105586.1-trav |(1660, 1957)|2.92100187489|(0.983,0.961,0.979)|1
-GTRAQSVTQLDSHVSVSEGTPVLLRCNYSSSY--S-PSLFWYVQHPNKGLQLLLKYTSR
ATLVKGINGFEAEFKKSETSFHLTKPSAHMSDAAEYFCAVS-----
>V10RF-CABD02105588.1-trav |(25116, 25407)|2.98430822856|(1.000,0.998,0.987)|1
VWSQQKEVEQNSGPLSVPEGAIASLNCTYSDRR--S-QSFFWYRQYSGKSPELIMSIYSN
GD-KE-DGRFTAQLNKASQYVSLLIRDSQPSDSATYLCAV------
>V11RF-CABD02105589.1-trav |(20536, 20829)|2.90991833509|(0.988,0.936,0.997)|1
-VSRGESEGLHLPTLSVQEGDNSIINCAYSNSA--S-DYFIWYKQESGKGPQFIIDIRSN
MD-KRQGQRVTVLLNKTVKHLSLQIAATQPGDSAVYFCAEN-----
>V12RF-CABD02105589.1-trav |(26461, 26764)|2.91549151212|(0.981,0.942,1.000)|1
-PGIAQKITQTQPGMFMQEKEAVTLDCTYDTSD--QSYGLFWYKQPSSGEMIFLIYQGSY
DQQNATEGRYSLNFQKARKSANLVISASQLGDSATYFCAMRE----
>V13RF-CABD02105590.1-trav |(3574, 3868)|2.99899200002|(0.999,1.000,1.000)|1
-RTRGDSVTQMEGPVTLSEEAFLTINCTYTATG--Y-PSLFWYVQYPGEGLQLLLKATKA
DD-KGSNKGFEATYHKETTSFHLEKDSVQASDSAVYFCALS-----
>V14RF-CABD02105592.1-trav |(17384, 17677)|2.98442416586|(0.999,0.999,0.987)|1
VWSQQKEVEQDPGPLSVPEGAIASLNCTYSNSA--F-QYFMWYRQYSRKGPELLMYTYSS
GN-KE-DGRFTVQVDKSSKYISLFIRDSQPSDSATYLCAMS-----
>V15RF-CABD02105596.1-trav |(11716, 12003)|2.99899600001|(1.000,0.999,1.000)|1
--VNSQQGEEDPQALSIQEGENATMNCSYKT-S--I-NNLQWYRQNSGRGLVHLILIRSN
ER-EKHSGRLRVTLDTSKKSSSLLITASRAADTASYFCATD-----
>V17RF-CABD02105602.1-trav |(5884, 6171)|2.98696000066|(0.997,0.996,0.994)|1
-LSGEDQVTQSPEALRLQEGESSSLNCSYTVSG--L-RGLFWYRQDPGKGPEFLFTLYSA
GE-EKEKERLKATLTKKE--SFLHITAPKPEDSATYLCAVQ-----
>V18RF-CABD02105602.1-trav |(17805, 18104)|2.80806255635|(0.969,0.887,0.979)|1
-VSSKQEVTQIPAALSVPEGENLVLNCSFTDSA--I-YSLQWFRQDPGKGLTSLLLIQSS
QR-EQTSGRLNASLDKSSGHSTLYIAASQPGDSATYLCAVRHS---
>V23RF-CABD02105615.1-trav |(7807, 8097)|2.91889600501|(0.975,0.970,0.974)|1
--TIIDAKTTQPTSMDCAEGRAANLPCNHSTIS--GNEYVYWYRQIHSQGPQYIIHGLKN
NE---TNEMASLIITEDRKSSTLILPHATLRDTAVYYCIVRV----
>V28RF-CABD02105626.1-trav |(22480, 22780)|2.99496000066|(0.999,1.000,0.996)|1
-FSMAQTVTQSQPEMSVQEAETVTLSCTYDTSE--SDYYLFWYKQPPSRQMILVIRQEAY
KQQNATENRFSVNFQKAAKSFSLKISDSQLGDAAMYFCAYR-----
>V29RF-CABD02105628.1-trav |(15554, 15842)|2.98093200206|(0.992,0.993,0.996)|1
-LSGELKVGQNPLFLSTQEGKNYTIYCNYSTTS----DRLYWYKQDPGKSLESLFVLLSN
GA-VKQEGRLMASLDTKARLSSLHITAAVHDLSATYFCAV------
>V194RF-AQIB01128636.1-trav |(12150, 12438)|2.91070318412|(0.995,0.935,0.995)|-1
-LSGELKVGQNPLFLSTQEGKNDTIYCNYSTAS----DRLYWYRQDPGKSLESLFVLLSN
GA-VKQEGRFMASLDTKARLSTLHITAALQDLSATYFCAV------
>V198RF-AQIB01128637.1-trav |(79553, 79853)|2.87742849428|(0.975,0.964,0.943)|-1
-SGMAQTVTQSQPEMSVREAETVTLSCTYDTSE--SYYYLFWYKQPPSRQMTLIIRQEAY
KQQNATENRFSVNFQKAAKSFSLKISDSQLGDAARYFCAYR-----
>V205RF-AQIB01128642.1-trav |(7440, 7727)|2.94701938908|(0.996,0.990,0.965)|-1
-LSGEDQVTQSPEALSLQEGESSSLNCSYTVSG--L-RGLFWYRQDPGKGPEFLFSLYSA
GE-EKEKERLKATLTKKE--SFLHITGPKPEDSATYLCAVQ-----
>V207RF-AQIB01128643.1-trav |(8686, 8977)|2.94061205453|(0.982,0.973,0.986)|-1
-RTNGDSVTQTEGPVTLPERAALTLNCTYQTSY--S-AFIFWYVQYPKKEPELLLKS-SE
NQ-ETNSRGFQASHVKSDSSFHLEKPSVQLSDSAVYYCVLR-----
>V208RF-AQIB01128643.1-trav |(11902, 12205)|2.91965257659|(0.976,0.985,0.960)|-1
-SSMAQKVTQAQTEISVVEKEDVTLDCVYETRE--TTYYLFWYKQPPSGELVFLIRQNSF
NEQNEINGRYSSNFQKSTSSFNLTITASQVMDSAVYFCALNE----
>V211RF-AQIB01128644.1-trav |(158071, 158361)|2.97288400513|(0.992,0.987,0.994)|-1
-MSRGDDVEQS-LFLSVREGDISVINCTYTDSS--S-TYLYWYKQEPGAGLQLLIYILSN
TD-LKQDQRLTVLLNKKDKHLSLRIADTQTGDSAIYFCAES-----
>V213RF-AQIB01128644.1-trav |(203408, 203702)|2.98532022844|(1.000,0.999,0.987)|-1
-GINGDSVVQTEGQVLLSEGNSLIVNCSYESTQ--Y-PSLFWYVQYPGEGPQLLLKAMKD
ND-KESNKGFEATYRKETTSFHLEKDSVQESDSAVYFCALS-----
>V214RF-AQIB01128644.1-trav |(216592, 216885)|2.90215937872|(0.958,0.959,0.989)|-1
-GSGKNQVEQSPQSLIILEGKNCTLQCNYTVSP--F-SNLRWYKQDTGKGLISLTIMTFS
DN-TKSNGRYTATLDADTKQSSLYITAAQLSDSASYICVVS-----
>V215RF-AQIB01128644.1-trav |(232171, 232464)|2.98410040488|(1.000,0.985,1.000)|-1
VWGQQKEVEQNPGPLSVPEGATASLNCTYSNSA--F-QYFMWYRQYSRKGPQLLIYIYSS
GN-KE-DGRFTAQVDKSSKYISLFIRDSQPSDSATYFCAMS-----
>V217RF-AQIB01128644.1-trav |(243150, 243447)|2.97536527997|(1.000,0.997,0.980)|-1
-TARAQSVTQPDIHITVSEGASLELRCNYSYGA--T-PSLFWYVQSPGQGLQLLLKYFSG
DTLVQGIKGFEAEFKRSQYSFNLRKPSVHWSDAAEYFCAAG-----
>V218RF-AQIB01128644.1-trav |(257060, 257353)|2.99393200206|(0.999,1.000,0.995)|-1
-VSRGESVGLHLPTVSVQEGDNSVINCTYSDSA--S-DYFLWYKQESGKGPQSIIDIRSN
MA-KRQGQRLTVLLNKTMKHLSLQIAATEPGDSAVYFCAEN-----
>V219RF-AQIB01128644.1-trav |(262905, 263206)|2.97428822908|(0.997,0.994,0.984)|-1
-SGIAQKITQTQPAMFVQEKEAVTLDCTYDTSD--QSYGLFWYKQPSSGEMIFLIRQESY
DKQNATEGRYSLNFQKARKSVNLVISASQVEDSAMYFCAMR-----
>V220RF-AQIB01128644.1-trav |(280831, 281125)|2.98521630725|(1.000,1.000,0.986)|-1
-RTRGDSVTQMEGPVTLSERAFLTINCTYTATG--Y-PSLFWYVQYPGEGPQLLLKAVKT
DE-KGSNKGFEATYRKETTSFHLKKDSVQESDSAVYFCALS-----
>V221RF-AQIB01128644.1-trav |(305369, 305662)|3.0|(1.000,1.000,1.000)|-1
VWSQQKEVEQNPGPLSVPEGATASLNCTYSNSA--F-QYFMWYRQYSRKGPQLLIYIYSS
GN-KE-DGRFTAQVDKSSKYISLFIRDSQPSDSATYFCAMS-----
>V222RF-AQIB01128644.1-trav |(340098, 340385)|2.994900005|(1.000,1.000,0.995)|-1
--VNSQQGEEDPQTLSIQEGENATMNCSYKT-S--I-NNLQWYRQDSGRSLVQLTLIRSN
ER-QKNSGRLRVTLDTSKKSSSLLITASRAADTASYFCATD-----
>V55RF-JYKQ01054925.1-trav |(5041, 5338)|2.64615296524|(0.965,0.802,0.981)|1
-GLRAQLVTQPEDQVTVAEGNPLTVKCTYSVSG--N-PYLFWYVQYPNQGLQFLLKYITG
DNLVKGSYGFEAEFNKSQTSFHLKKPSALVSDSALYFCAVR-----
>V56RF-JYKQ01054933.1-trav |(11630, 11920)|2.9898400105|(0.994,1.000,0.996)|1
-MSRGEDVEQS-LFLSVREGDISVINCTYTDSS--S-TYLYWYKQEPGAGLQLLIYILSN
MD-LKRDQRVTVLLNKKDKHLSLRIADTQTEDSAIYFCAES-----
>V57RF-JYKQ01054940.1-trav |(18103, 18397)|2.98532022844|(1.000,0.999,0.987)|1
-GINGDSVVQTEGQVLLSEGNSLIVNCSYESTQ--Y-PSLFWYVQYPGEGPQLLLKAMKD
ND-KESNKGFEATYRKETTSFHLEKDSVQESDSAVYFCALS-----
>V58RF-JYKQ01054940.1-trav |(31345, 31638)|2.97502906788|(0.982,0.995,1.000)|1
-GSGKNQVEQSPQSLIILEGKNCTLQCNYTVSP--F-NNLRWYKQDTGKGPISLTIMTFS
EN-TKSNGRYIATLDADTKQSSLHITAAQLSDSASYICVVS-----
>V59RF-JYKQ01054940.1-trav |(46970, 47276)|2.97403640693|(0.998,0.994,0.983)|1
VWSQQKEVEQDPGPFSVPEGATVTFNCTYSNSA--S-QSFFWYRQDSRKEPKLLMSAYSS
GN--E-DGRFTAQLNRASQYISLLIRDSQLSDSATYLCAVYTQCSP
>V60RF-JYKQ01054940.1-trav |(52430, 52727)|2.89429209206|(0.998,0.937,0.976)|1
-GTRAQSVTQLDSQVSVSEGAPVLLRCNYSSSV--P-PYLFWYVQYPNQGLQLLLKYTSG
TTLVKGINGFEAEFKKSETSFHLRKASAHVSDAAEYFCAVS-----
>V61RF-JYKQ01054942.1-trav |(16188, 16478)|2.96248712253|(0.996,0.971,0.998)|1
--VNGENVEQHPSILSVQEGDSSVIKCTYSDSA--S-NYFPWYKQELGKEPQFIIDIRSN
AH-EKKDQRITVLLNKTAKHFSLHITETQPGDSAVYFCAAS-----
>V62RF-JYKQ01054942.1-trav |(38704, 38992)|2.98780001921|(0.998,0.991,0.999)|1
VWSQQ-KVEQNSGPLSVPEGAIASLNCTYSDRG--S-QSFFWYRQYSGQSPELLMSTYSS
GD-KE-DGRFTAQLNRASQYVSLLIRDSQPSDSATYLCAV------
>V65RF-JYKQ01054942.1-trav |(64627, 64920)|2.95737067436|(0.998,1.000,0.964)|1
-VSRGESVGLHLPTVSVQEGDNSVINCTYSDSA--S-DYFLWYKQESGKGPQSIIDIRSN
MA-KRQGQRLTVFLNKTMKHLSLQIAATEPGDSAVYFCAEN-----
>V66RF-JYKQ01054942.1-trav |(70517, 70818)|2.89976559063|(1.000,0.994,0.927)|1
-SGIAQKITQTQPAMFVQEKEAVTLDCTYDTSD--QSYGLFWYKQPSSGEMIFLILQMSY
DKQNATEGRYSLNFQKARKSVNLVISASQVGDSAMYFCAMR-----
>V67RF-JYKQ01054942.1-trav |(88856, 89150)|2.99593600205|(1.000,1.000,0.996)|1
-RTRGDSVTQMEGPVTLSERAFLTINCTYTATG--Y-PSLFWYVQYPGEGPQLLLKATKT
DE-KGSNKGFEATYRKETTSFHLKKDSVQESDSAVYFCALS-----
>V68RF-JYKQ01054942.1-trav |(113522, 113815)|2.99286400565|(0.995,1.000,0.998)|1
VWSQQKEVEQNPGPLSVPEGATASLNCTYSNSA--F-QYFMWYRQYSRKGPQLLIYIYSS
GN-KE-DGRFTAQVDKSSKYISLFIRDSQPNDSATYFCAMS-----
>V70RF-JYKQ01054953.1-trav |(3497, 3784)|2.99699200002|(0.999,1.000,0.998)|1
--VNSQQGEEDPQTLSIQEGENATMNCSYKT-S--I-NNLQWYRQDSGRSLVQLILIRSN
ER-EKNSGRLRVTLDTSKKSSSLLITASRAADTASYFCATD-----
>V71RF-JYKQ01054957.1-trav |(3986, 4277)|2.95226014987|(0.978,0.989,0.986)|1
-RTNGDSVTQTEGPVTLPERAALTLNCTYQTSY--S-AFIFWYVQYPNKEPELLLKS-SE
NQ-ETNSRGFQASHVKSDSSFHLEKPSVQLSDSAVYYCVLR-----
>V72RF-JYKQ01054957.1-trav |(7206, 7509)|2.78842728968|(0.959,0.968,0.884)|1
-SSMAQKVTQAQTEISVVEKEDVTLDCVYETRD--TTYYLFWYKQPPSGELVFLIRQNSF
DEQNEINGRYYSKFQKSTSSFNLTITASQVVDSAVYFCALNE----
>V73RF-JYKQ01054957.1-trav |(42945, 43232)|2.70767561292|(0.936,0.911,0.877)|1
-LSGEDQVTQSPEALSLQEGDSSSLNCSYTVSG--L-RGLLWYRQDPGKGPEFLFILYSA
GE-EKEKERLKATLTKKE--SFLHITGPKPEDSATYLCAVQ-----
>V121RF-JYKQ01135388.1-trav |(4501, 4803)|2.98789600501|(0.998,0.993,0.997)|1
-SGMAQTVTQSQPEMSVQEAETVTLSCTYDTSE--SNYYLFWYKQPPSRQMILIIRQEAY
KQQNATENRFSVNFQKATKSFSLKISDSQLGDAAMYFCAYRS----
>V122RF-JYKQ01135389.1-trav |(2804, 3092)|2.99496000066|(0.999,1.000,0.996)|1
-LSGELKVGQNPLFLSTQEGKNYTIYCNYSTAS----DRLYWYRQDPGKSLESLFVLLSN
GA-VKQEGRLMASLDTKARLSSLHITAALQDLSATYFCAV------
>V167RF-JYKQ01026663.1-trav |(902, 1202)|2.7495910766|(0.916,0.939,0.898)|-1
-SSVAQKVTQTQSSVSMPVEKAVTLNCQYETSR--WSYYLFWYKQPPSKEMIFLIRQGSS
-EPNAKSGRYSVNFQKAASSIALTISALQLEDSATYFCALWE----
