# Supplementary material for: Iterative Variable Gene Discovery from Whole Genome Sequencing with a Bootstrapped Multiresolution Algorithm
Source: Comput Math Methods Med. 2019 Feb 11;2019:3780245. doi: 10.1155/2019/3780245 (PMC6388353; doi:10.1155/2019/3780245)
Supplement: Supplementary Materials — supp_materialsV2.pdf: this is an updated document, which includes new figures requested by the reviewer. sequences_alignments.zip: these are genome sequence files that are relevant for reproducing some of the results. [file 3780245.f1.zip › 3780245.f1/sequences_alignments/trav_2.nwk]

(V215RF-AQIB01128644.1-trav:0.01008,V68RF-JYKQ01054942.1-trav:0.01004,((V128RF-ABGA01387833.1-trav:0.05229,((V89RF-AGCE01026529.1-trav:0.07016,((V95RF-AGCE01026531.1-trav:0.02446,((V147RF-ABGA01083939.1-trav:0.01018,(V65RF-ADFV01192037.1-trav:0.02083,((V61RF-AJFE01069975.1-trav:0.0,V71RF-AACZ03097613.1-trav:0.0):0.01033,V7RF-CABD02105584.1-trav:0.00055)0.000:0.00055)0.787:0.01034)0.789:0.01085,((V125RF-AQIA01064144.1-trav:0.0,V196RF-JABR01098603.1-trav:0.0):0.00054,(V86RF-AHZZ01198216.1-trav:0.00055,V59RF-JYKQ01054940.1-trav:0.00965)0.920:0.00942)0.862:0.02013)0.744:0.02922)0.997:0.13628,((((V50RF-ABDC01379531.1-trav:0.0,V93RF-ABDC01491653.1-trav:0.0):0.08553,(V55RF-JZKE01143895.1-trav:0.05121,(V59RF-JZKE01143896.1-trav:0.01863,V60RF-JZKE01143902.1-trav:0.01008)0.749:0.00055)0.906:0.01970)0.708:0.01246,(V53RF-ABDC01388284.1-trav:0.11960,(((((V4RF-AHZZ01035404.1-trav:0.00055,((V152RF-AQIA01064166.1-trav:0.0,V122RF-JYKQ01135389.1-trav:0.0):0.00054,(V194RF-AQIB01128636.1-trav:0.02109,(V93RF-JABR01039937.1-trav:0.04216,(V94RF-ADFV01192050.1-trav:0.03189,(V224RF-ABGA01321068.1-trav:0.00053,((V117RF-AJFE01024276.1-trav:0.01038,V61RF-AACZ03095319.1-trav:0.00055)0.929:0.02102,V29RF-CABD02105628.1-trav:0.02096)0.000:0.00054)0.752:0.00055)0.958:0.03181)0.000:0.00053)0.895:0.01041)0.830:0.01023)0.997:0.45276,V87RF-AJFE01010527.1-trav:0.50284)0.775:0.05150,(((((V73RF-AJFE01069977.1-trav:0.0,V17RF-CABD02105602.1-trav:0.0):0.00054,V83RF-AACZ03097619.1-trav:0.01062)0.751:0.01092,(V73RF-JYKQ01054957.1-trav:0.03216,((V139RF-AQIA01064151.1-trav:0.0,V205RF-AQIB01128642.1-trav:0.0):0.00055,V37RF-AHZZ01098200.1-trav:0.01056)0.664:0.00636)0.542:0.01504)0.996:0.30156,(V200RF-JABR01098604.1-trav:0.01750,(V62RF-ADFV01192035.1-trav:0.03124,(V57RF-AJFE01069975.1-trav:0.01030,V68RF-AACZ03097613.1-trav:0.00055)0.752:0.01023)0.763:0.04677)1.000:0.42309)0.068:0.00098,((V104RF-ABDC01542818.1-trav:0.07152,V37RF-JZKE01143869.1-trav:0.00873)0.901:0.07281,(V207RF-AHZZ01093946.1-trav:0.05977,(V91RF-ADFV01192045.1-trav:0.04889,((V115RF-AJFE01024276.1-trav:0.0,V58RF-AACZ03095314.1-trav:0.0):0.00055,V201RF-AACZ03171149.1-trav:0.00972)0.772:0.00981)0.724:0.00991)0.911:0.07563)1.000:0.44377)0.862:0.06373)0.570:0.06808,(((V62RF-JZKE01143910.1-trav:0.06869,((V64RF-ADFV01192037.1-trav:0.01964,(V202RF-JABR01098604.1-trav:0.01754,(V58RF-JYKQ01054940.1-trav:0.00948,((V124RF-AQIA01064138.1-trav:0.0,V85RF-AHZZ01198214.1-trav:0.0):0.00055,V214RF-AQIB01128644.1-trav:0.02866)0.846:0.00946)0.694:0.00447)0.802:0.01608)0.784:0.00936,(V70RF-AACZ03097613.1-trav:0.00055,(V60RF-AJFE01069975.1-trav:0.00946,(V146RF-ABGA01083939.1-trav:0.00946,V6RF-CABD02105581.1-trav:0.00947)0.000:0.00055)0.000:0.00054)0.448:0.00054)0.889:0.08798)1.000:0.38255,((V52RF-JZKE01143893.1-trav:0.10442,(V86RF-AGCE01026527.1-trav:0.15660,((V184RF-JABR01098598.1-trav:0.02839,(V136RF-AQIA01064148.1-trav:0.00930,(V222RF-AQIB01128644.1-trav:0.01870,(V34RF-AHZZ01098200.1-trav:0.00942,V70RF-JYKQ01054953.1-trav:0.00055)0.000:0.00054)0.839:0.00934)0.918:0.00055)0.902:0.01996,(((V71RF-AJFE01069976.1-trav:0.0,V81RF-AACZ03097619.1-trav:0.0):0.00947,(V121RF-ABGA01386446.1-trav:0.0,V15RF-CABD02105596.1-trav:0.0):0.00055)0.773:0.00785,V76RF-ADFV01192039.1-trav:0.06840)0.745:0.01031)0.723:0.02316)0.800:0.06141)0.991:0.18038,((V56RF-AACZ03095312.1-trav:0.54518,(V145RF-AQIA01064165.1-trav:0.02138,V208RF-AHZZ01093949.1-trav:0.00779)0.993:0.45396)0.964:0.31727,(V74RF-JZKE01143916.1-trav:0.13173,(V149RF-ABGA01113129.1-trav:0.03082,(V61RF-ADFV01192035.1-trav:0.01039,(V56RF-AJFE01069975.1-trav:0.0,V67RF-AACZ03097613.1-trav:0.0,V167RF-AACZ03171395.1-trav:0.0):0.02071)0.178:0.00054)0.935:0.11714)0.984:0.21065)0.681:0.02925)0.899:0.13073)0.276:0.07241,(V82RF-AGCE01026522.1-trav:0.02502,V18RF-CABD02105602.1-trav:0.03237)1.000:0.48146)0.635:0.11964)0.949:0.23619,(((V86RF-ADFV01192042.1-trav:0.00940,V23RF-CABD02105615.1-trav:0.00055)1.000:1.46686,((((V55RF-JYKQ01054925.1-trav:0.00054,(V59RF-ADFV01192035.1-trav:0.02089,V151RF-ABGA01113133.1-trav:0.04378)0.074:0.01040)0.983:0.22387,((V91RF-AGCE01026530.1-trav:0.00941,(V67RF-ADFV01192037.1-trav:0.02063,((V62RF-AJFE01069975.1-trav:0.0,V72RF-AACZ03097613.1-trav:0.0):0.01038,(V130RF-AQIA01064146.1-trav:0.01040,(V191RF-JABR01098600.1-trav:0.0,V217RF-AQIB01128644.1-trav:0.0):0.00055)0.904:0.02096)0.768:0.01033)0.816:0.02311)1.000:0.27047,((V60RF-JYKQ01054940.1-trav:0.02006,(V87RF-AHZZ01198216.1-trav:0.00054,(V126RF-AQIA01064144.1-trav:0.00055,((V66RF-ADFV01192037.1-trav:0.00054,(V148RF-ABGA01083939.1-trav:0.05308,V8RF-CABD02105586.1-trav:0.04833)0.750:0.01402)0.958:0.04050,V190RF-JABR01098600.1-trav:0.03076)0.862:0.02015)0.537:0.01006)0.868:0.02037)0.346:0.01527,(V70RF-ADFV01192038.1-trav:0.03060,((V65RF-AJFE01069975.1-trav:0.0,V75RF-AACZ03097614.1-trav:0.0):0.05146,V142RF-ABGA01083934.1-trav:0.02006)0.000:0.00054)0.764:0.01546)0.875:0.08749)0.945:0.12354)0.875:0.15802,(((V132RF-ABDC01454736.1-trav:0.07003,((V73RF-ADFV01192039.1-trav:0.02070,(((V63RF-AHZZ01107545.1-trav:0.0,V67RF-JYKQ01054942.1-trav:0.0):0.00055,(V133RF-AQIA01064146.1-trav:0.00418,V220RF-AQIB01128644.1-trav:0.00830)0.926:0.00818)0.989:0.05328,(V127RF-ABGA01387833.1-trav:0.02103,((V68RF-AJFE01069976.1-trav:0.0,V78RF-AACZ03097618.1-trav:0.0):0.01000,V13RF-CABD02105590.1-trav:0.00054)0.343:0.02069)0.760:0.02044)0.000:0.00054)0.985:0.07592,V61RF-JZKE01143903.1-trav:0.02205)0.801:0.02766)0.728:0.04333,(V75RF-JZKE01143916.1-trav:0.11573,(((V59RF-AJFE01069975.1-trav:0.00977,V69RF-AACZ03097613.1-trav:0.00055)0.934:0.01987,(V145RF-ABGA01083939.1-trav:0.00055,(V63RF-ADFV01192035.1-trav:0.00992,V5RF-CABD02105579.1-trav:0.00055)0.847:0.00985)0.000:0.00055)0.666:0.00367,(V98RF-AGCE01026534.1-trav:0.14595,(V201RF-JABR01098604.1-trav:0.03997,(V123RF-AQIA01064138.1-trav:0.01988,(V213RF-AQIB01128644.1-trav:0.0,V57RF-JYKQ01054940.1-trav:0.0):0.01960)0.717:0.00054)0.791:0.01019)0.726:0.01606)0.964:0.10164)0.906:0.08449)0.956:0.21181,(V49RF-JZKE01143890.1-trav:0.14872,(V87RF-AGCE01026527.1-trav:0.04326,(V103RF-ABDC01533415.1-trav:0.16868,(V77RF-ADFV01192039.1-trav:0.02903,(((((V137RF-AQIA01064149.1-trav:0.0,V71RF-JYKQ01054957.1-trav:0.0):0.00055,V207RF-AQIB01128643.1-trav:0.01020)0.000:0.00055,V35RF-AHZZ01098200.1-trav:0.02108)0.907:0.02922,V185RF-JABR01098598.1-trav:0.01567)0.789:0.01706,V122RF-ABGA01386446.1-trav:0.02072)0.774:0.01368)0.767:0.00978)0.758:0.00898)0.962:0.16930)0.944:0.19898)0.932:0.22790)0.994:0.58335,((V35RF-JZKE01143868.1-trav:0.06413,((V171RF-JABR01098590.1-trav:0.00939,(V93RF-ADFV01192049.1-trav:0.01856,(V60RF-AACZ03095317.1-trav:0.00906,(V116RF-AJFE01024276.1-trav:0.00055,(V225RF-ABGA01321070.1-trav:0.0,V28RF-CABD02105626.1-trav:0.0):0.00055)0.000:0.00055)0.792:0.00917)0.769:0.00890)0.769:0.00921,(V3RF-AHZZ01035404.1-trav:0.00055,(V151RF-AQIA01064166.1-trav:0.00053,(V198RF-AQIB01128637.1-trav:0.04739,V121RF-JYKQ01135388.1-trav:0.00053)0.105:0.01795)0.837:0.00908)0.777:0.00906)0.810:0.02391)0.884:0.10694,((V49RF-ABDC01379531.1-trav:0.01987,((((V219RF-AQIB01128644.1-trav:0.00950,((V66RF-JYKQ01054942.1-trav:0.00054,(V132RF-AQIA01064146.1-trav:0.00055,V62RF-AHZZ01107545.1-trav:0.00934)0.927:0.01888)0.926:0.01963,((V72RF-ADFV01192039.1-trav:0.03287,(V126RF-ABGA01387831.1-trav:0.02919,(V77RF-AACZ03097618.1-trav:0.00954,((V67RF-AJFE01069976.1-trav:0.0,V202RF-AACZ03171512.1-trav:0.0):0.01987,V12RF-CABD02105589.1-trav:0.01962)0.978:0.00054)0.542:0.01957)0.708:0.00848)0.961:0.04631,V193RF-JABR01098600.1-trav:0.04482)0.493:0.00164)0.793:0.00137)0.998:0.12927,V65RF-JZKE01143910.1-trav:0.05226)0.737:0.02523,V58RF-JZKE01143896.1-trav:0.04545)0.750:0.01410,V54RF-JZKE01143895.1-trav:0.02863)0.890:0.02690)0.924:0.07686,((V51RF-JZKE01143891.1-trav:0.07820,((V208RF-AQIB01128643.1-trav:0.01528,((V138RF-AQIA01064149.1-trav:0.00904,V72RF-JYKQ01054957.1-trav:0.00912)0.766:0.00811,V36RF-AHZZ01098200.1-trav:0.04376)0.381:0.01370)0.249:0.01930,V186RF-JABR01098598.1-trav:0.01043)0.982:0.10917)0.946:0.11554,V167RF-JYKQ01026663.1-trav:0.33604)0.762:0.08080)0.898:0.11648)0.964:0.41541)0.559:0.02977)0.910:0.36550,(((((V192RF-JABR01098600.1-trav:0.00957,(V65RF-JYKQ01054942.1-trav:0.00960,(V131RF-AQIA01064146.1-trav:0.01938,(V61RF-AHZZ01107544.1-trav:0.0,V218RF-AQIB01128644.1-trav:0.0):0.00055)0.000:0.00055)0.869:0.02001)0.902:0.03736,(V71RF-ADFV01192038.1-trav:0.01936,(V141RF-ABGA01083932.1-trav:0.03942,(V66RF-AJFE01069976.1-trav:0.00055,V11RF-CABD02105589.1-trav:0.00965)0.955:0.01930)0.915:0.00053)0.809:0.02385)0.995:0.12129,(V73RF-ABDC01418428.1-trav:0.13857,(V57RF-JZKE01143896.1-trav:0.16094,V53RF-JZKE01143895.1-trav:0.02052)0.373:0.03287)0.576:0.01858)0.875:0.03886,(V68RF-JZKE01143915.1-trav:0.11648,(V92RF-AGCE01026530.1-trav:0.11276,(((V127RF-AQIA01064146.1-trav:0.00976,(V195RF-JABR01098601.1-trav:0.01956,V61RF-JYKQ01054942.1-trav:0.00976)0.796:0.00983)1.000:0.00054,V58RF-AHZZ01107544.1-trav:0.00956)0.872:0.01760,(V143RF-ABGA01083937.1-trav:0.01141,(V63RF-AJFE01069975.1-trav:0.00055,V73RF-AACZ03097614.1-trav:0.00988)0.986:0.06088)0.265:0.01589)0.848:0.03087)0.967:0.07356)0.294:0.02430)0.956:0.14436,((V97RF-AGCE01026534.1-trav:0.16242,(V3RF-CABD02105570.1-trav:0.01998,(V150RF-ABGA01113130.1-trav:0.03032,((V55RF-AJFE01069975.1-trav:0.00986,V66RF-AACZ03097612.1-trav:0.00054)0.935:0.00053,(V60RF-ADFV01192035.1-trav:0.02028,((V198RF-JABR01098604.1-trav:0.00054,V211RF-AQIB01128644.1-trav:0.02003)0.871:0.00054,(V121RF-AQIA01064137.1-trav:0.01016,(V83RF-AHZZ01198213.1-trav:0.00055,V56RF-JYKQ01054933.1-trav:0.00989)0.958:0.03004)0.278:0.01003)0.921:0.03100)0.793:0.00969)0.020:0.00986)0.721:0.00966)0.212:0.01217)0.979:0.14118,(V46RF-ABDC01377653.1-trav:0.11507,V73RF-JZKE01143916.1-trav:0.01718)0.665:0.08716)0.600:0.09058)0.920:0.18954)0.604:0.11955)0.989:0.31117)0.772:0.02662)0.984:0.09916,((V69RF-ADFV01192038.1-trav:0.03775,(V10RF-CABD02105588.1-trav:0.00054,(V64RF-AJFE01069975.1-trav:0.00055,V74RF-AACZ03097614.1-trav:0.02029)0.828:0.01015)0.683:0.00520)0.843:0.02544,(V62RF-JYKQ01054942.1-trav:0.00055,(V189RF-JABR01098600.1-trav:0.05248,((V128RF-AQIA01064146.1-trav:0.02063,V59RF-AHZZ01107544.1-trav:0.01042)0.522:0.01043,V93RF-AGCE01026530.1-trav:0.07513)0.539:0.00055)0.716:0.01039)0.943:0.04999)0.949:0.06243)0.741:0.02166)0.969:0.07578)0.882:0.03536,(V74RF-ADFV01192039.1-trav:0.03049,(V69RF-AJFE01069976.1-trav:0.02034,(V79RF-AACZ03097619.1-trav:0.01004,V14RF-CABD02105592.1-trav:0.01010)0.000:0.00053)0.776:0.01003)0.751:0.01029)0.717:0.00970)0.939:0.03091,((V134RF-AQIA01064146.1-trav:0.0,V221RF-AQIB01128644.1-trav:0.0):0.00055,(V32RF-AHZZ01098200.1-trav:0.02011,V187RF-JABR01098599.1-trav:0.02024)0.772:0.01014)0.000:0.00053)0.000:0.00055);
