# Supplementary material for: Iterative Variable Gene Discovery from Whole Genome Sequencing with a Bootstrapped Multiresolution Algorithm
Source: Comput Math Methods Med. 2019 Feb 11;2019:3780245. doi: 10.1155/2019/3780245 (PMC6388353; doi:10.1155/2019/3780245)
Supplement: Supplementary Materials — supp_materialsV2.pdf: this is an updated document, which includes new figures requested by the reviewer. sequences_alignments.zip: these are genome sequence files that are relevant for reproducing some of the results. [file 3780245.f1.zip › 3780245.f1/sequences_alignments/trav_3.dnd]

(
(
(
V54RF-ABDC01388284.1-trav:0.104605
,
(
(
V51RF-ABDC01379531.1-trav:0
,
V91RF-ABDC01491653.1-trav:0
):0.0723684
,
(
V56RF-JZKE01143896.1-trav:0.0394737
,
(
V52RF-JZKE01143895.1-trav:0.0315789
,
V57RF-JZKE01143902.1-trav:0.0315789
):0.00789474
):0.0328947
):0.0322368
):0.0554329
,
(
(
V87RF-AGCE01026529.1-trav:0.0768914
,
(
V123RF-ABGA01387833.1-trav:0.0485026
,
(
(
V188RF-JABR01098599.1-trav:0.0201823
,
(
V31RF-AHZZ01098200.1-trav:0.0195312
,
(
V67RF-JYKQ01054942.1-trav:0.0078125
,
(
V211RF-AQIB01128644.1-trav:0.00520833
,
(
V217RF-AQIB01128644.1-trav:0
,
V136RF-AQIA01064146.1-trav:0
):0.00520833
):0.00260417
):0.0117188
):0.000651043
):0.0249023
,
(
V75RF-ADFV01192039.1-trav:0.0286458
,
(
(
V14RF-CABD02105592.1-trav:0.0104167
,
V78RF-AACZ03097619.1-trav:0.0104167
):0.00520833
,
V68RF-AJFE01069976.1-trav:0.015625
):0.0130208
):0.0164388
):0.00341797
):0.0283888
):0.0751292
,
(
(
V93RF-AGCE01026531.1-trav:0.0375665
,
(
(
V59RF-JYKQ01054940.1-trav:0.0075
,
(
V83RF-AHZZ01198216.1-trav:0.005
,
(
V197RF-JABR01098603.1-trav:0
,
V127RF-AQIA01064144.1-trav:0
):0.005
):0.0025
):0.0197606
,
(
V142RF-ABGA01083939.1-trav:0.0172872
,
(
V66RF-ADFV01192037.1-trav:0.0132979
,
(
V7RF-CABD02105584.1-trav:0.00531915
,
(
V70RF-AACZ03097613.1-trav:0
,
V60RF-AJFE01069975.1-trav:0
):0.00531915
):0.00797872
):0.00398936
):0.0099734
):0.0103059
):0.1033
,
(
(
V70RF-ADFV01192038.1-trav:0.0302632
,
(
V73RF-AACZ03097614.1-trav:0.0131579
,
(
V10RF-CABD02105588.1-trav:0.00526316
,
V63RF-AJFE01069975.1-trav:0.00526316
):0.00789474
):0.0171053
):0.0586051
,
(
V91RF-AGCE01026530.1-trav:0.0724734
,
(
V190RF-JABR01098600.1-trav:0.0385638
,
(
V130RF-AQIA01064146.1-trav:0.018617
,
(
V56RF-AHZZ01107544.1-trav:0.0159574
,
V62RF-JYKQ01054942.1-trav:0.0159574
):0.00265957
):0.0199468
):0.0339096
):0.0163949
):0.051998
):0.0111543
):0.00801755
):0.987182
,
(
(
V74RF-AGCE01026519.1-trav:0.331394
,
(
(
(
V146RF-ABGA01113133.1-trav:0.0302527
,
(
V2RF-CABD02105568.1-trav:0.0251289
,
(
V60RF-ADFV01192035.1-trav:0.0193299
,
(
V122RF-AQIA01064137.1-trav:0.00773196
,
(
V121RF-AHZZ01044061.1-trav:0.00515464
,
V55RF-JYKQ01054925.1-trav:0.00515464
):0.00257732
):0.0115979
):0.00579897
):0.00512379
):0.168408
,
(
(
V89RF-AGCE01026530.1-trav:0.0277062
,
(
V68RF-ADFV01192037.1-trav:0.0244845
,
(
(
V71RF-AACZ03097613.1-trav:0
,
V61RF-AJFE01069975.1-trav:0
):0.0180412
,
(
(
V192RF-JABR01098600.1-trav:0
,
V213RF-AQIB01128644.1-trav:0
):0.00515464
,
V132RF-AQIA01064146.1-trav:0.00515464
):0.0128866
):0.0064433
):0.00322165
):0.13846
,
(
V55RF-ABDC01388284.1-trav:0.135138
,
(
(
V60RF-JYKQ01054940.1-trav:0.0321762
,
(
V198RF-JABR01098603.1-trav:0.0319749
,
(
V63RF-JYKQ01054942.1-trav:0.0298003
,
(
V212RF-AQIB01128644.1-trav:0.0215851
,
(
V191RF-JABR01098600.1-trav:0.0199742
,
(
V131RF-AQIA01064146.1-trav:0.0141753
,
(
V57RF-AHZZ01107544.1-trav:0.0128866
,
(
V84RF-AHZZ01198216.1-trav:0.00515464
,
V128RF-AQIA01064144.1-trav:0.00515464
):0.00773196
):0.00128866
):0.00579897
):0.00161082
):0.00821521
):0.00217461
):0.000201352
):0.023861
,
(
(
V74RF-AACZ03097614.1-trav:0
,
V64RF-AJFE01069975.1-trav:0
):0.0618557
,
(
V143RF-ABGA01083939.1-trav:0.0483247
,
(
V8RF-CABD02105586.1-trav:0.0476804
,
(
V137RF-ABGA01083934.1-trav:0.0309278
,
(
V67RF-ADFV01192037.1-trav:0.0257732
,
V71RF-ADFV01192038.1-trav:0.0257732
):0.00515464
):0.0167526
):0.00064433
):0.0135309
):-0.00581848
):0.0791009
):0.0310285
):0.0324942
):0.0863231
,
(
(
(
V63RF-JZKE01143913.1-trav:0.0834961
,
(
V128RF-ABDC01454736.1-trav:0.0745443
,
(
V58RF-JZKE01143903.1-trav:0.0664062
,
(
(
(
(
V60RF-AHZZ01107545.1-trav:0
,
V66RF-JYKQ01054942.1-trav:0
):0.00520833
,
V216RF-AQIB01128644.1-trav:0.00520833
):0
,
V135RF-AQIA01064146.1-trav:0.00520833
):0.0371094
,
(
V74RF-ADFV01192039.1-trav:0.0299479
,
(
V122RF-ABGA01387833.1-trav:0.0234375
,
(
V13RF-CABD02105590.1-trav:0.00520833
,
(
V77RF-AACZ03097618.1-trav:0
,
V67RF-AJFE01069976.1-trav:0
):0.00520833
):0.0182292
):0.00651042
):0.0123698
):0.0240885
):0.00813802
):0.00895182
):0.0584156
,
(
V72RF-JZKE01143916.1-trav:0.119572
,
(
V96RF-AGCE01026534.1-trav:0.086263
,
(
(
(
V68RF-AACZ03097613.1-trav:0.00520833
,
V58RF-AJFE01069975.1-trav:0.00520833
):0.0117188
,
(
V140RF-ABGA01083939.1-trav:0.0078125
,
(
V64RF-ADFV01192035.1-trav:0.00520833
,
V5RF-CABD02105579.1-trav:0.00520833
):0.00260417
):0.00911458
):0.0214844
,
(
V202RF-JABR01098604.1-trav:0.03125
,
(
(
V209RF-AQIB01128644.1-trav:0
,
V57RF-JYKQ01054940.1-trav:0
):0.015625
,
V125RF-AQIA01064138.1-trav:0.015625
):0.015625
):0.00716146
):0.0478516
):0.0333094
):0.0223393
):0.100156
,
(
V46RF-JZKE01143890.1-trav:0.187459
,
(
V101RF-ABDC01533415.1-trav:0.115378
,
(
V85RF-AGCE01026527.1-trav:0.0447368
,
(
V78RF-ADFV01192039.1-trav:0.0371711
,
(
V117RF-ABGA01386446.1-trav:0.0309211
,
(
V186RF-JABR01098598.1-trav:0.0276316
,
(
V34RF-AHZZ01098200.1-trav:0.0131579
,
(
V204RF-AQIB01128643.1-trav:0.00526316
,
(
V70RF-JYKQ01054957.1-trav:0
,
V139RF-AQIA01064149.1-trav:0
):0.00526316
):0.00789474
):0.0144737
):0.00328947
):0.00625
):0.00756579
):0.0706415
):0.0720806
):0.0546092
):0.0429158
):0.0464096
):0.744782
,
(
(
(
(
V144RF-AQIA01064159.1-trav:0.0127551
,
(
V205RF-AHZZ01093949.1-trav:0.0102041
,
V176RF-JABR01098595.1-trav:0.0102041
):0.00255102
):0.275643
,
(
(
V198RF-AACZ03171059.1-trav:0.018617
,
(
V24RF-CABD02105616.1-trav:0.0159574
,
V57RF-AACZ03095312.1-trav:0.0159574
):0.00265957
):0.0359043
,
(
V208RF-AHZZ01093949.1-trav:0.0265957
,
V148RF-AQIA01064166.1-trav:0.0265957
):0.0279255
):0.233876
):0.10577
,
(
(
V82RF-AGCE01026522.1-trav:0.0440789
,
(
V165RF-JYKQ01026655.1-trav:0.0328947
,
(
V177RF-JABR01098595.1-trav:0.0236842
,
(
(
V87RF-ADFV01192042.1-trav:0.00526316
,
V23RF-CABD02105615.1-trav:0.00526316
):0.0105263
,
(
V88RF-AACZ03097624.1-trav:0.00526316
,
V212RF-AACZ03179105.1-trav:0.00526316
):0.0105263
):0.00789474
):0.00921053
):0.0111842
):0.344074
,
(
(
(
V210RF-AHZZ01093953.1-trav:0.00510204
,
(
V167RF-JYKQ01026665.1-trav:0
,
V204RF-JYKQ01066669.1-trav:0
):0.00510204
):0.0408163
,
V166RF-JYKQ01026663.1-trav:0.0459184
):0.167201
,
(
(
V48RF-JZKE01143891.1-trav:0.106061
,
(
V35RF-AHZZ01098200.1-trav:0.0328283
,
(
(
V71RF-JYKQ01054957.1-trav:0.010101
,
V140RF-AQIA01064149.1-trav:0.010101
):0.0176768
,
(
V187RF-JABR01098598.1-trav:0.0252525
,
V205RF-AQIB01128643.1-trav:0.0252525
):0.00252525
):0.0050505
):0.0732323
):0.106098
,
(
(
V33RF-JZKE01143868.1-trav:0.0658482
,
(
V196RF-AQIB01128637.1-trav:0.0353954
,
(
(
V172RF-JABR01098590.1-trav:0.0242347
,
(
V120RF-JYKQ01135388.1-trav:0.0126778
,
(
V3RF-AHZZ01035404.1-trav:0.00510204
,
V152RF-AQIA01064166.1-trav:0.00510204
):0.00757576
):0.0115569
):-0.00067077
,
(
V95RF-ADFV01192049.1-trav:0.0178571
,
(
V60RF-AACZ03095317.1-trav:0.00508916
,
(
(
V27RF-CABD02105626.1-trav:0
,
V114RF-AJFE01024276.1-trav:0
):0
,
V219RF-ABGA01321070.1-trav:0
):0.00508916
):0.012768
):0.00570678
):0.0118315
):0.0304528
):0.112828
,
(
(
(
V194RF-JABR01098600.1-trav:0.03125
,
(
V215RF-AQIB01128644.1-trav:0.0216837
,
(
V65RF-JYKQ01054942.1-trav:0.0127551
,
(
V59RF-AHZZ01107545.1-trav:0.00510204
,
V134RF-AQIA01064146.1-trav:0.00510204
):0.00765306
):0.00892857
):0.00956633
):0.0177774
,
(
V73RF-ADFV01192039.1-trav:0.0366162
,
(
V121RF-ABGA01387831.1-trav:0.0315657
,
(
(
V201RF-AACZ03171512.1-trav:0
,
V66RF-AJFE01069976.1-trav:0
):0.0176768
,
(
V12RF-CABD02105589.1-trav:0.0151515
,
V76RF-AACZ03097618.1-trav:0.0151515
):0.00252525
):0.0138889
):0.00505051
):0.0124113
):0.0540079
,
(
V62RF-JZKE01143910.1-trav:0.0568182
,
(
V51RF-JZKE01143895.1-trav:0.0530303
,
(
V50RF-ABDC01379531.1-trav:0.0454545
,
V55RF-JZKE01143896.1-trav:0.0454545
):0.00757576
):0.00378788
):0.0462171
):0.0756409
):0.0334826
):0.000961021
):0.175033
):0.00601506
):0.771475
,
(
(
(
(
V47RF-ABDC01377653.1-trav:0.0631579
,
V70RF-JZKE01143916.1-trav:0.0631579
):0.10074
,
(
V95RF-AGCE01026534.1-trav:0.100164
,
(
(
V145RF-ABGA01113130.1-trav:0.0282895
,
(
V3RF-CABD02105570.1-trav:0.0302632
,
(
V61RF-ADFV01192035.1-trav:0.0157895
,
(
V65RF-AACZ03097612.1-trav:0.00526316
,
V54RF-AJFE01069975.1-trav:0.00526316
):0.0105263
):0.0144737
):-0.00197368
):0.0143092
,
(
(
V80RF-AHZZ01198213.1-trav:0.00526316
,
V56RF-JYKQ01054933.1-trav:0.00526316
):0.0197368
,
(
V123RF-AQIA01064137.1-trav:0.0157895
,
(
V199RF-JABR01098604.1-trav:0.0105263
,
V207RF-AQIB01128644.1-trav:0.0105263
):0.00526316
):0.00921053
):0.0175987
):0.0575658
):0.0637335
):0.0498805
,
(
(
V65RF-JZKE01143915.1-trav:0.124753
,
(
V90RF-AGCE01026530.1-trav:0.0883224
,
(
(
V72RF-AACZ03097614.1-trav:0.00526316
,
V62RF-AJFE01069975.1-trav:0.00526316
):0.0384868
,
(
V138RF-ABGA01083937.1-trav:0.0296053
,
(
V196RF-JABR01098601.1-trav:0.0171053
,
(
(
V55RF-AHZZ01107544.1-trav:0.0105263
,
V129RF-AQIA01064146.1-trav:0.0105263
):0.00526316
,
V61RF-JYKQ01054942.1-trav:0.0157895
):0.00131579
):0.0125
):0.0141447
):0.0445724
):0.0364309
):0.0263261
,
(
(
(
V193RF-JABR01098600.1-trav:0.0221354
,
(
V133RF-AQIA01064146.1-trav:0.0130208
,
(
(
V58RF-AHZZ01107544.1-trav:0
,
V214RF-AQIB01128644.1-trav:0
):0.00520833
,
V64RF-JYKQ01054942.1-trav:0.00520833
):0.0078125
):0.00911458
):0.0345052
,
(
V136RF-ABGA01083932.1-trav:0.0325521
,
(
V72RF-ADFV01192038.1-trav:0.0234375
,
(
V11RF-CABD02105589.1-trav:0.00520833
,
V65RF-AJFE01069976.1-trav:0.00520833
):0.0182292
):0.00911458
):0.0240885
):0.0779216
,
(
V74RF-ABDC01418428.1-trav:0.109375
,
(
V54RF-JZKE01143896.1-trav:0.0924479
,
(
V80RF-ABDC01440241.1-trav:0.0755208
,
(
V50RF-JZKE01143895.1-trav:0.015625
,
V61RF-JZKE01143910.1-trav:0.015625
):0.0598958
):0.0169271
):0.0169271
):0.0251872
):0.0165172
):0.0626992
):0.621043
,
(
(
V146RF-AQIA01064165.1-trav:0.0178571
,
(
V22RF-CABD02105614.1-trav:0.00510204
,
(
V87RF-AACZ03097624.1-trav:0
,
V202RF-AACZ03171676.1-trav:0
):0.00510204
):0.0127551
):0.312861
,
(
(
V59RF-JZKE01143910.1-trav:0.0951223
,
(
(
V210RF-AQIB01128644.1-trav:0.0260417
,
(
(
(
V82RF-AHZZ01198214.1-trav:0
,
V126RF-AQIA01064138.1-trav:0
):0.0104167
,
V58RF-JYKQ01054940.1-trav:0.0104167
):0.00520833
,
V203RF-JABR01098604.1-trav:0.015625
):0.0104167
):0.00603755
,
(
V65RF-ADFV01192037.1-trav:0.0203947
,
(
V141RF-ABGA01083939.1-trav:0.00911458
,
(
V59RF-AJFE01069975.1-trav:0.0078125
,
(
V6RF-CABD02105581.1-trav:0.00520833
,
V69RF-AACZ03097613.1-trav:0.00520833
):0.00260417
):0.00130208
):0.0112802
):0.0116845
):0.0630431
):0.210927
,
(
(
(
V96RF-ADFV01192050.1-trav:0.025266
,
(
(
V61RF-AACZ03095319.1-trav:0.00531915
,
V115RF-AJFE01024276.1-trav:0.00531915
):0.0132979
,
(
V28RF-CABD02105628.1-trav:0.0106383
,
V218RF-ABGA01321068.1-trav:0.0106383
):0.00797873
):0.00664894
):0.015625
,
(
V93RF-JABR01039937.1-trav:0.0305851
,
(
V193RF-AQIB01128636.1-trav:0.018617
,
(
V4RF-AHZZ01035404.1-trav:0.00531915
,
(
V121RF-JYKQ01135389.1-trav:0
,
V153RF-AQIA01064166.1-trav:0
):0.00531915
):0.0132979
):0.0119681
):0.0103059
):0.26322
,
(
(
(
(
V144RF-ABGA01113129.1-trav:0.0239362
,
(
(
V62RF-ADFV01192035.1-trav:0.0106383
,
V4RF-CABD02105575.1-trav:0.0106383
):0.00531915
,
(
(
V66RF-AACZ03097613.1-trav:0
,
V166RF-AACZ03171395.1-trav:0
):0
,
V55RF-AJFE01069975.1-trav:0
):0.0159574
):0.00797872
):0.103723
,
(
V48RF-ABDC01377655.1-trav:0.0531915
,
V71RF-JZKE01143916.1-trav:0.0531915
):0.0744681
):0.122735
,
(
(
V100RF-ABDC01533414.1-trav:0.0478723
,
V49RF-JZKE01143893.1-trav:0.0478723
):0.0838182
,
(
V84RF-AGCE01026527.1-trav:0.106799
,
(
V77RF-ADFV01192039.1-trav:0.0500332
,
(
(
(
V15RF-CABD02105596.1-trav:0
,
V116RF-ABGA01386446.1-trav:0
):0.00531915
,
(
V80RF-AACZ03097619.1-trav:0
,
V70RF-AJFE01069976.1-trav:0
):0.00531915
):0.0255984
,
(
V185RF-JABR01098598.1-trav:0.0246011
,
(
V138RF-AQIA01064148.1-trav:0.0146277
,
(
V218RF-AQIB01128644.1-trav:0.0132979
,
(
V33RF-AHZZ01098200.1-trav:0.00531915
,
V69RF-JYKQ01054953.1-trav:0.00531915
):0.00797872
):0.00132979
):0.0099734
):0.00631649
):0.0191157
):0.0567653
):0.024892
):0.118704
):0.0803661
,
(
(
(
(
V204RF-AHZZ01093946.1-trav:0.0210526
,
(
V162RF-JYKQ01026643.1-trav:0.0105263
,
V150RF-AQIA01064166.1-trav:0.0105263
):0.0105263
):0.0355674
,
(
V175RF-JABR01098593.1-trav:0.0467875
,
(
V221RF-ABGA01321081.1-trav:0.0409155
,
(
V93RF-ADFV01192045.1-trav:0.0397256
,
(
(
V58RF-AACZ03095314.1-trav:0
,
V113RF-AJFE01024276.1-trav:0
):0.0159574
,
V200RF-AACZ03171149.1-trav:0.0159574
):0.0237682
):0.00118981
):0.00587206
):0.00983255
):0.0628587
,
(
V102RF-ABDC01542818.1-trav:0.0585106
,
V34RF-JZKE01143869.1-trav:0.0585106
):0.0609681
):0.17126
,
(
(
(
V21RF-CABD02105612.1-trav:0.0105263
,
V86RF-AACZ03097622.1-trav:0.0105263
):0
,
V86RF-AJFE01010527.1-trav:0.0105263
):0.271589
,
(
(
V81RF-AGCE01026522.1-trav:0.0420986
,
(
V184RF-JABR01098597.1-trav:0.0263158
,
(
V203RF-AQIB01128642.1-trav:0.0255102
,
(
V18RF-CABD02105602.1-trav:0.0102041
,
V73RF-AJFE01069977.1-trav:0.0102041
):0.0153061
):0.000805587
):0.0157828
):0.245447
,
(
(
V201RF-JABR01098604.1-trav:0.043883
,
(
V63RF-ADFV01192035.1-trav:0.0239362
,
(
V67RF-AACZ03097613.1-trav:0.00531915
,
V56RF-AJFE01069975.1-trav:0.00531915
):0.018617
):0.0199468
):0.178856
,
(
V80RF-AGCE01026522.1-trav:0.0477061
,
(
V80RF-ADFV01192040.1-trav:0.034242
,
(
(
(
(
V17RF-CABD02105602.1-trav:0
,
V72RF-AJFE01069977.1-trav:0
):0.00531915
,
V82RF-AACZ03097619.1-trav:0.00531915
):0.0172872
,
(
V72RF-JYKQ01054957.1-trav:0.018617
,
(
V36RF-AHZZ01098200.1-trav:0.00531915
,
(
V202RF-AQIB01128642.1-trav:0
,
V141RF-AQIA01064151.1-trav:0
):0.00531915
):0.0132979
):0.00398936
):0.00531915
,
(
V43RF-JABR01080842.1-trav:0.0212766
,
V183RF-JABR01098597.1-trav:0.0212766
):0.00664894
):0.00631649
):0.0134641
):0.175033
):0.0648063
):-0.00543001
):0.008623
):0.0400223
):-0.02665
):0.00193891
):0.024668
):0.621043
):0.150432
):-0.0266927
):0.2424
)
;
