# Supplementary material for: Iterative Variable Gene Discovery from Whole Genome Sequencing with a Bootstrapped Multiresolution Algorithm
Source: Comput Math Methods Med. 2019 Feb 11;2019:3780245. doi: 10.1155/2019/3780245 (PMC6388353; doi:10.1155/2019/3780245)
Supplement: Supplementary Materials — supp_materialsV2.pdf: this is an updated document, which includes new figures requested by the reviewer. sequences_alignments.zip: these are genome sequence files that are relevant for reproducing some of the results. [file 3780245.f1.zip › 3780245.f1/sequences_alignments/trav_3.fasta]

>V3RF-AHZZ01035404.1-trav |(11684, 11986)|2.99493200206|(1.000,0.996,0.999)|1
-SGMAQTVTQSQPEMSVQEAETVTLSCTYDTSD--SDYYLFWYKQPPSRQMILIIRQEAY
KQQNATENRFSVNFQKAAKSFSLKISDSQLGDAAMYFCAYRS----
>V4RF-AHZZ01035404.1-trav |(35215, 35503)|2.99799600001|(0.999,0.999,1.000)|1
-LSGELKVGQNPLFLSTQEGKNYTIYCNYST-A---SNRLYWYRQDPGKSLESLFVLLSN
GAVK-QEGRLMASLDTKARLSSLHITAALQDLSATYFCAV------
>V31RF-AHZZ01098200.1-trav |(876, 1169)|2.99398000014|(0.999,0.998,0.997)|1
VWSQQKEVEQNPGPLSVPEGATASLNCTYSNSA---FQNFMWYRQYSRKGPQLLIYTYSS
GNKE--EGRFTAQVDKSSKYISLFIRDSQPSDSATYFCAMS-----
>V33RF-AHZZ01098200.1-trav |(35496, 35783)|2.99496000066|(0.999,1.000,0.996)|1
--VNSQQGEEDPQTLSIQEGENATMNCSYKT-S---INNLQWYRQDSGRSLVQLILICSN
EREK-NSGRLRVTLDTSKKSSSLLITASRAADTASYFCATD-----
>V34RF-AHZZ01098200.1-trav |(47312, 47603)|2.95851611711|(0.990,0.979,0.990)|1
-RTNGDLVTQTEGPVTLPERAALTLNCTYQTSY--S-AFIFWYVQYPNKEPELLLKS-SE
NQ-ETNSRGFQASHDKSDSSFHLEKPSVQLSDSAVYYCVLR-----
>V35RF-AHZZ01098200.1-trav |(50539, 50842)|2.98788400513|(0.997,0.999,0.992)|1
-SSMAQKVTQAQTEISVVEKEDVTLDCVYETRE--NTYYLFWYKQPPSGELVFLIRRNSF
DEQNEMNGRYDSNFQKSTSSFNLTITASQVVDSAVYFCALNE----
>V36RF-AHZZ01098200.1-trav |(85982, 86269)|2.9460773318|(0.979,0.970,0.999)|1
-LSGEDQVMQSPEALSLQEGESSSLNCSYTVSG---LRGLFWYRQDPGKGPEFLFSLYSA
GEEK-EKERLKATLTKK--ESFLHITGPKPEDSATYLCAVQ-----
>V55RF-AHZZ01107544.1-trav |(5301, 5591)|2.99696400065|(1.000,1.000,0.997)|1
--VNGENVEQHPSTLSVQEGDSSVIKCTYSDSA---SNYFPWYKQELGKGPQFIIDIRSN
EHEK-KDQRITVLLNKTAKHFSLHITETQPGDSAVYFCAAS-----
>V56RF-AHZZ01107544.1-trav |(27803, 28091)|2.9898400105|(0.998,0.992,1.000)|1
VWSQQ-KVEQSSGPLSVPEGAIASLNCTYSDSG---SQSFFWYRQYSGQSPELLMSTYSS
GDKE--DGRFTAQLNRASQYVSLLIRDSQLSDSATYLCAV------
>V57RF-AHZZ01107544.1-trav |(34317, 34614)|2.66644284622|(0.993,0.948,0.832)|1
-GTRAQSVTQLDSQVSVSEGVPVLLRCNYSSSF--S-PTLFWYVQYPNQGLQLLLKYISG
TTLVKGINGFEAEFKKSETSFHLTKASAHVSDAAEYFCAVN-----
>V58RF-AHZZ01107544.1-trav |(53747, 54040)|3.0|(1.000,1.000,1.000)|1
-VSRGESVGLHLPTVSVQEGDNSVINCTYSDSA---SDYFLWYKQESGKGPQSIIDIRSN
MAKR-QGQRLTVLLNKTMKHLSLQIAATEPGDSAVYFCAEN-----
>V59RF-AHZZ01107545.1-trav |(4983, 5284)|2.97941612211|(0.988,0.999,0.993)|1
-SGIAQKITQTQPAMFVQEKEAVTLDCTYDTSD--QNYGLFWYKQPSSGEMIFLILQMSY
DKQNATEGHYSLNFQKARKSVNLVISASQVGDSATYFCAMR-----
>V60RF-AHZZ01107545.1-trav |(23299, 23593)|3.0|(1.000,1.000,1.000)|1
-RTRGDSVTQMEGPVTLSERAFLTINCTYTATG--Y-PSLFWYVQYPGEGPQLLLKATKT
DE-KGSNKGFEATYRKETTSFHLKKDSVQESDSAVYFCALS-----
>V80RF-AHZZ01198213.1-trav |(10234, 10524)|2.99385601037|(1.000,1.000,0.994)|1
-MSRGEDVEQS-LFLSVREGDISVINCTYTDSS---STYLYWYKQEPGAGLQLLTYILSN
MDLK-RDQRVTVLLNKKDKHLSLRIADTQTEDSAIYFCAES-----
>V82RF-AHZZ01198214.1-trav |(53657, 53950)|3.0|(1.000,1.000,1.000)|1
-GSGKNQVEQSPQSLIILEGKNCTLQCNYTVSP---FSNLRWYKQDTGKGPISLTIMTFS
ENTK-SNGRYTATLDADTKQSSLHITAAQLSDSASYICVVS-----
>V83RF-AHZZ01198216.1-trav |(1076, 1382)|2.99798400013|(1.000,1.000,0.998)|1
VWSQQKEVEQDPGPFSVPEGATVTFNCTYSNSA---SQSFFWYRQDSRKEPKLLMSVYSS
GN-E--DGRFTAQLNRASQYISLLIRDSQLSDSATYLCAVYTQCSP
>V84RF-AHZZ01198216.1-trav |(6535, 6832)|2.97560484445|(1.000,0.982,0.995)|1
-GTRAQSVTQLDSQVSVSEGVPVLLRCNYSSSV--S-PYLFWYVQYPNQGLQLLLKYTSG
TTLVKGINGFEAEFKKSETSFHLTKASAHVSDAAEYFCAVN-----
>V121RF-AHZZ01044061.1-trav |(5488, 5785)|2.68533707447|(0.931,0.822,0.995)|-1
-GLRAQLVTQPEDQVTVAERNPLTVKCTYSVSG--N-PYLFWYVQYPNQGLQFLLKYITG
DNLVKGSYGFEAEFNKSQTSFHLKKPSALVSDSALYFCAVR-----
>V204RF-AHZZ01093946.1-trav |(12355, 12645)|2.95519216959|(0.986,0.975,0.995)|-1
-VSSEDKVMQNPLSLVVHEGDTVTLNCSYEVVN---FQSLLWYKQEK-KAPTFLFTLTSS
GIEK-KSGRLSSILDKKDFFSILNITATQTRDSAVYLCAVE-----
>V205RF-AHZZ01093949.1-trav |(3892, 4191)|2.92723664903|(0.990,0.991,0.952)|-1
--VNGQQIMQIPQYQHVQEGEDFTTYCNSST----TLNNIQWYKQRPGGHPVFLIMLVKS
GEVK-KQKRLTFQFGEAKKNSSLHITATQTTDVGSYFCAGHSAPQ-
>V208RF-AHZZ01093949.1-trav |(61192, 61479)|2.37016112853|(0.819,0.737,0.843)|-1
--VRSQKPVQSPQVVILQEGEDAIINCNSSK----ALYSVHWYRQKHGEAPVFLMILLKG
GEQK-SHDKIVATFNEKKQQSSLYLMASQLSYSRTYFCGAE-----
>V210RF-AHZZ01093953.1-trav |(7506, 7806)|2.43956463016|(0.901,0.795,0.816)|-1
-SSVAQKVTQAQSSVSMPVGKAVTLNCQYETSS--WSYDLFWYKQPPSKEMIFLIRQ-GY
SEQNARNGRYSVNFQKAASSIALTISALQLEDSATYFCALRE----
>V43RF-JABR01080842.1-trav |(1737, 2024)|2.34577730718|(0.934,0.684,0.950)|1
-LSGEDQVTQSPEALRLREGESSSLNCSYTVSS---LRGLLWYRQDPGKGPEFLFILYSA
GEEK-EKERLKATLTKK--ESFLHITGPKPEDSATYLCAVQ-----
>V93RF-JABR01039937.1-trav |(16162, 16450)|2.97593200206|(0.993,0.994,0.989)|-1
-LSGELKVGQNPLFLSTQEGRNYTVYCNYST-A---SDRLYWYRQNPGKSLESLFVLLSN
GAVK-QEGRLMASLDTKARLSTLYITAALQDLSATYFCAV------
>V172RF-JABR01098590.1-trav |(5160, 5460)|2.97592430843|(1.000,0.987,0.990)|-1
-FSMAQTVTQSQPEMSVQEAETVTLSCTYDTSD--SDYYLFWYKQPPSRQMILIIRQEAY
KQQNATENRFSVNFQKAAKSFSLKISDSQLGDAAGYFCAYR-----
>V175RF-JABR01098593.1-trav |(29181, 29471)|2.58020777517|(0.892,0.798,0.931)|-1
-VSSEDKVVQNPLSLVVHEGDTVTLNCSYEVIN---FRSLLWYKQEK-KAPTFLFMLTSS
GFDK-KKGRLSGILDKKELFSILNITATQTRDSAIYLCAVE-----
>V176RF-JABR01098595.1-trav |(1678, 1977)|2.55939586679|(0.980,0.991,0.762)|-1
--VNGQQIMQIPQYQHVQEGEDFTTYCNSST----TLNNIQWYKQRPGGHPVFLIVLVKS
GEVK-KQKRLTFQFGEAKKNSSLHITATQTTDVGTYFCAGHSAPQ-
>V177RF-JABR01098595.1-trav |(12709, 12999)|2.25578695659|(0.947,0.674,0.901)|-1
--TIIDAKTTQPTSMDCAEGRGANLPCNHSTIS--GNEYIYWYRQIHSQGPQYVIHGLKN
NE---TNAMASLIITEDRKSSTLILPHATLRDTAVYYCIVRV----
>V183RF-JABR01098597.1-trav |(9844, 10131)|2.38652589709|(0.945,0.702,0.950)|-1
-LSGEDQVTQSPEALRLQEGQSSSLNCSYTASN---LRGLLWYRQDPGKGPEFLFILYSA
GEEK-EKERLKATLTKK--ESFLHITGPKPEDSATYLCAVQ-----
>V184RF-JABR01098597.1-trav |(21891, 22182)|2.30484773634|(0.881,0.660,0.979)|-1
-VSSKQEVTQIPAALSVPEGDNLVLNCSFTDSA---IYNLQWFRQDPGKGLTSLLLIQSS
QREQ-TSGRLNASLDKSSRHSTLYITASEPGDSATYLCAV------
>V185RF-JABR01098598.1-trav |(19033, 19320)|2.98174002125|(0.995,0.988,0.999)|-1
--VNSQQGEEDPQALSIQEGENATMNCSYKT-S---IDNLQWYRQDSGRSLVRLILIRSN
EREK-SSGRLRVTLDTSKKSSSLLITASRAADTASYFCATD-----
>V186RF-JABR01098598.1-trav |(25184, 25475)|2.97806440553|(0.997,1.000,0.982)|-1
-RTNGDSVTQTEGPVTLPERAALTLNCTYQTSY--S-AFMFWYVQYLNKEPELLLKS-SE
NQ-ETDSRGFQASHVKSDSSFHLEKLSVQLSDSAVYYCVLR-----
>V187RF-JABR01098598.1-trav |(28683, 28986)|2.9349882524|(0.990,0.963,0.985)|-1
-SSMAQKVTQAQTEISVVEKEDVNLDCVYETRD--STYYLFWYKQPPSGELIFLIRQNSF
NEQNEINGRYSSNFQKSTSSFNLTITASQVVDSAVYFCALNE----
>V188RF-JABR01098599.1-trav |(7776, 8069)|2.9939280013|(1.000,0.997,0.997)|-1
VWSQQKEVEQNPGPLSVPEGATASLNCTYSNSA---FQYFMWYKQYSRKGPQLLIYTYSS
GDKE--DGRFTAQVDKSSKYISLFIRDSQPSDSATYFCAMS-----
>V190RF-JABR01098600.1-trav |(14202, 14490)|2.9654040992|(0.983,0.990,0.993)|-1
VWSQQ-KVEQNSGSLSVPEGAIASLNCTYSDRG---SQSFLWYRQYSGQSPELLISTYSS
GDKE--DGRFTAQLNKASQYVSLLIRDSQLSDSATYLCVV------
>V191RF-JABR01098600.1-trav |(20988, 21285)|2.92715364218|(0.994,0.958,0.981)|-1
-GTRAQSVTQLDSQVSVSEGVPVLLRCNYSSSF--S-PSLFWYVQYPNQGLQLLLKYISG
TALVKGINGFEAEFKKSETTFHLTKASAHVSDAAEYFCAVS-----
>V192RF-JABR01098600.1-trav |(26541, 26838)|3.0|(1.000,1.000,1.000)|-1
-TARAQSVTQPDIHITVSEGASLELRCNYSYGA--T-PSLFWYVQSPGQGLQLLLKYFSG
DTLVQGIKGFEAEFKRSQYSFNLRKPSVHWSDAAEYFCAAG-----
>V193RF-JABR01098600.1-trav |(40729, 41022)|2.95610320239|(0.998,0.973,0.988)|-1
-VSRGESVGLHLPTVSVQEGDNSVINCTYSDSV---SDYFLWYKQESGKGPQFIIDIRSN
MAKR-QGQRLTVLLNKTVKHLSLQIAATEPGDSAVYFCAEN-----
>V194RF-JABR01098600.1-trav |(52617, 52918)|2.92866172079|(0.988,0.967,0.976)|-1
-SGIAQKITQTQPAMFMQEKEAVTLDCTYDTSD--QNYGLFWYKQPSSGEMIFLIHQESY
DKQNATEGRYSLNFQKARKSINLIISASQVGDSAMYFCAMR-----
>V196RF-JABR01098601.1-trav |(15930, 16220)|2.99799600001|(0.999,1.000,0.999)|-1
--VNGENVEQHPSILSVQEGDSSVIKCTYSDSA---SNYFPWYKQELGKGPQLIIDIRSN
VHEK-KDQRITVLLNKTAKHFSLHITETQPGDSAVYFCAAS-----
>V197RF-JABR01098603.1-trav |(9193, 9499)|2.99798400013|(1.000,1.000,0.998)|-1
VWSQQKEVEQDPGPFSVPEGATVTFNCTYSNSA---SQSFFWYRQDSRKEPKLLMSVYSS
GN-E--DGRFTAQLNRASQYISLLIRDSQLSDSATYLCAVRTQCSP
>V198RF-JABR01098603.1-trav |(14624, 14921)|2.26855962926|(0.979,0.752,0.820)|-1
-GTRAQSVTQLDSQVSVSEGVPVLLRCNYSSPV--S-PNLFWYVQYPNQGLQLLLKYTSG
TTLVKGINGFKAEFKKSETSFHLTKASAHVSDAAEYFCAVS-----
>V199RF-JABR01098604.1-trav |(11404, 11694)|2.99899600001|(1.000,1.000,0.999)|-1
-MSRGEDVEQS-LFLSVREGDISVINCTYTDSS---STYLYWYKQEPGAGLQLLTYILSN
TDLK-QDQRLTVLLNKKDKHLSLRIADTQTGDSAIYFCAES-----
>V201RF-JABR01098604.1-trav |(37115, 37402)|2.93800040988|(0.983,0.968,0.988)|-1
-ANGENQVEQSPRFLGPQQGDVAFMSCMYSVSR---FNNLQWYRQNTGTGPKHLFSMYSA
GYEK-QKGRLNATLLKN--GSSLYITAMQPEDSATYFCAVD-----
>V202RF-JABR01098604.1-trav |(64438, 64732)|2.99294800078|(0.996,0.999,0.998)|-1
-EINGDSVVQTEGQVLLSEGDSLIVNCSYESTQ--Y-PSLFWYVQYPGEGPQLLLKAMMA
ND-KESNKGFEATYHKETTSFHLKKDSVQESDSAVYFCALS-----
>V203RF-JABR01098604.1-trav |(77658, 77951)|2.98660803841|(0.991,0.998,0.998)|-1
-GSGKNQVEQSPQSLIILEGKNCTLQCNYTVSP---FNNLRWYKQDTGKGPISLTIMTFS
ENTK-LNGRYTATLDADTKQSSLHITATQLSDSASYICVVS-----
>V74RF-AGCE01026519.1-trav |(24104, 24394)|2.20521382335|(0.708,0.800,0.733)|-1
-GTNSNSVKQTD-QVIISEGASVTMNCTYTAMG--Y-PTLFWYVQYPNKPLQFLQEETME
NS-----KNFGARNIKD-KNSPIAKHSVQVSDSAMYYCLLRDTVLR
>V80RF-AGCE01026522.1-trav |(3924, 4211)|2.53838866514|(0.937,0.951,0.764)|-1
-LSGEDQVTQSPEALRLQEGDSSSLNCSYTVGN---FGGLLWYRQDPGKGPEFLFILYSA
GEEK-QKERLKATLTKK--ESFLRITAPKPEDSATYLCAVQ-----
>V81RF-AGCE01026522.1-trav |(15303, 15602)|2.9415016842|(0.983,0.963,0.998)|-1
-VSSKQEVTQIPAALSVPEGESLVFNCSFTDSA---IYYLQWFRQDPGKGLTSLLLIQSS
QREQ-TSGRLNASLDKSSRYSTLHIAASQPGDSATYLCAVRHS---
>V82RF-AGCE01026522.1-trav |(67327, 67617)|2.54296739792|(0.857,0.864,0.826)|-1
--TIIDAKTTQPTSMDCAEGRAANLPCNHSTIS--GNEYIHWYRQSYSQEPQYVIHGLKN
NE---TNEMASLIIAEDRKSSILILPHATLRDTAVYYCIVRV----
>V84RF-AGCE01026527.1-trav |(1820, 2116)|2.94226014987|(0.980,0.991,0.972)|-1
--VNSQQGEEEPQTLSIQEGENAIINCSYKT-S---ITSLQWYRQDSNRGLTQLILIRSN
EREK-HSGRLRFMLDTSMKSSSLFIAAAQAADTAAYFCATEAQC--
>V85RF-AGCE01026527.1-trav |(7054, 7345)|2.97097652411|(0.996,0.996,0.980)|-1
-RTYGDSVTQTEGPVTLPEGAALTLNCTYQSSY--S-VFLFWYVQYLDKEPQLLLKS-SE
NQ-ETDSRGFQASHVKSDSSFRLEKPSVQLSDSAVYYCALR-----
>V87RF-AGCE01026529.1-trav |(3178, 3469)|2.95806587284|(0.994,0.972,0.994)|-1
VWSQQKEVEQNPGSLSVPEGAIASLSCTYSNRA---FQYFMWYRQYSRKGPELLTFIYSS
DKKE--DGRFTAQLNKSSQYISLFIRDSQPSDSATYLCAM------
>V89RF-AGCE01026530.1-trav |(8602, 8899)|2.96351211712|(0.992,0.991,0.981)|-1
-DARAQSVTQPDIHITVSEGASLELRCNYSYGA--T-PYLFWYVQSPGQGLQLLLRYFSG
DTLVQGIKGFEAEFKRSQSSFNLRKPSVHWSDAAEYFCAVS-----
>V90RF-AGCE01026530.1-trav |(21106, 21396)|2.93200449196|(0.964,0.982,0.990)|-1
--VNGENVEQHPSTLSVQVGDSSVINCTYSDSA---SNYFPWYKQELGKGPRLIIDIRSN
VDKR-KDGRMTVLLNKAAKHFSLHITDTQPGDSALYFCAAG-----
>V91RF-AGCE01026530.1-trav |(40762, 41065)|2.97578801933|(0.995,0.988,0.993)|-1
VWSQQ-KVEQNSGPLNVPEGVIASLNCTYSDRG---SQSFYWYRQYPGKSPELLMSVYSS
GN-E--DGRFTAQLNRASQYVSLLIRDSQLSDSATYLCAVSTRCSP
>V93RF-AGCE01026531.1-trav |(478, 766)|2.98480001921|(0.993,0.992,1.000)|-1
VWSQQKEVEQDPGPFNVPEGTTVAFNCTYSNSA---SQYFFWYRQDPRKGPKLLMSVYSS
GN-E--DGRFTAQLNRASQYVSLLIRDSQLSDSATYLCAV------
>V95RF-AGCE01026534.1-trav |(23755, 24045)|2.9834040992|(0.989,0.999,0.996)|-1
-MSSGEDVEQS-RFLSVQEGDSVVMNCTYTDSS---SSYLYWYKQEPGASLQLLAYILSN
TDMK-QDQRLTVQLDKKNKHLSLHVAEAQTGDSAIYFCAES-----
>V96RF-AGCE01026534.1-trav |(44840, 45134)|2.91252655653|(0.948,0.992,0.986)|-1
-GISGDSVVQTEGEVLLSEGDSLTVNCSYESTG--Y-PSLFWYVQYPGKGPELLLKATKG
ND-KGSNKDFEAIYRTETTSFHLEKGSVRESDSAVYFCALS-----
>V60RF-ADFV01192035.1-trav |(8555, 8856)|2.96595641525|(0.996,0.981,0.990)|1
-GLRAQLVAQPEDQVTVAEGNPLTVKCTYSVSG--N-PYLFWYVQYPNQGLQFLLKYIAG
DNLVKGSYGFEAEFNKSQTSFYLKKPSALVSDSALYFCAVRD----
>V61RF-ADFV01192035.1-trav |(53089, 53379)|2.99294800078|(0.996,0.999,0.998)|1
-MNRGEDVEQS-LFLGVREGDSSVINCTYTDSS---STYLYWYKQEPGAGLQLLTYIFSN
MDLK-QDQRLTVLLNKKDKHLSLRIADTQTGDSAIYFCAES-----
>V62RF-ADFV01192035.1-trav |(63802, 64090)|2.98694800078|(0.996,0.993,0.998)|1
--VKSQKIEQNSEALNIQEGKTATLTCNYTNYS---PAYLLWYRQDPGRGPVFLLLIREN
EKEK-RKERLKVTFDTTLKQSLFHITASQPADSATYLCAL------
>V63RF-ADFV01192035.1-trav |(73447, 73734)|2.95774192532|(0.991,0.969,1.000)|1
-ANGEKQVEHSPHFLGSQQGDVASVSCMYSVSR---FNNLQWYRQNTGMGPKHLLSMYSA
GYEK-QKGRLNATLLKN--GSSLYITAVQPEDSATYFCAVD-----
>V64RF-ADFV01192035.1-trav |(102005, 102299)|2.97870083945|(0.999,1.000,0.981)|1
-GINGDSVVQTEGQVLLSEGDSLIVNCSYETTQ--Y-PSLFWYVQYPGEGPQLLLKAMKA
ND-KGRNKGFEATYHKETTSFHLEKDSVQEADSAVYFCALS-----
>V65RF-ADFV01192037.1-trav |(3179, 3470)|2.95216889635|(0.986,0.969,0.999)|1
-GSCKNQVEQSPQSLIILEGKNCTLQCNYTVSP---FNNLRWYKQDTGKGPVSLTIMTLS
ENTK-SNGRYTATLDADTKQSSLHITASQLSDSASYICVV------
>V66RF-ADFV01192037.1-trav |(20251, 20539)|2.98258408012|(0.997,0.987,0.999)|1
VWSQRKEVEQDPGPFNVPEGATVAFNCTYSNSV---SQSFFWYRQDCRKEPKLLMSVYSS
GN-E--DGRFTAQLNRASQYIYLLIRDSQLSDSATYLCAV------
>V67RF-ADFV01192037.1-trav |(26000, 26297)|2.99598400013|(0.998,1.000,0.998)|1
-GTRAQSVTQLDSHVSVSEGTPVLLRCNYSSSY--S-PSLFWYVQYPNQGLQLLLKYTSG
TTLVKGINGFEAEFKKSETSFHLTKSSAHVSDAAEYFCAVS-----
>V68RF-ADFV01192037.1-trav |(31699, 31996)|2.85283890549|(0.992,0.926,0.957)|1
-TARAQSVTQPDIHITVSEGASLELRCNYSYGA--T-PSLFWYVQSPGRGLQLLLKYFSG
DTLVQGIKGFEAEFQRSQSSFNLRKPSVHWSDAAEYFCAVS-----
>V70RF-ADFV01192038.1-trav |(22028, 22319)|2.98209640489|(0.999,0.984,1.000)|1
VWSQQKEVEQNSGPLSDPEGAIASLNCTYSDRS---SQSFFWYRQYSGKSPELITSIYSN
GDKE--DGRFTAQLNKASQYVSLLIRDSQLSDSATYLCAV------
>V71RF-ADFV01192038.1-trav |(28540, 28837)|2.9824040992|(1.000,0.990,0.993)|1
-GTRAQSVTQLDSHVSVSEGTLVLLRCNYSSSV--S-PNLFWYVQYPNQGLQLLLKYISG
TTLVKGINGFEAEFKKSETSFHLTKPSAHVSDAAEYFCAVS-----
>V72RF-ADFV01192038.1-trav |(50418, 50711)|2.98676801985|(0.997,0.990,1.000)|1
-VSRGESVGLHLPTLSVQEGNNSVINCAYSDSA---SDYFTWYKQESGKGPQFIIDIRSN
MDKR-QGQRVTVLLNKTVKHLSLQIAATQPGDSAVYFCAEN-----
>V73RF-ADFV01192039.1-trav |(5009, 5312)|2.99089600501|(0.995,0.996,1.000)|1
-PGIAQKIIQTQPAMFVQEKEAVTLDCTYDTSD--QSYGLFWYKQPSSGEMIFLISQASY
DKQNATEGRYSLNFQKARKSANLVISASQLGDSAKYFCAMRE----
>V74RF-ADFV01192039.1-trav |(24309, 24603)|2.9909280013|(0.997,0.994,1.000)|1
-RTHGDSVTQMEGPVTLSEEAFLTINCTYTATG--Y-PTLFWYVQYPGEGPQLLLKATRA
DD-KGSNKGFEATYRKETTSFHLEKDSVQESDSAVYFCALS-----
>V75RF-ADFV01192039.1-trav |(50026, 50319)|2.98386400565|(0.994,0.999,0.991)|1
VWCQQKEVEQNPGPLSVPEGAIASLNCTYSNSA---FQYFMWYRQYSRKGPELLMYTYSS
GNKE--DGRFTAQVDKSSKCISLFIRNSQPSDSATYLCAMS-----
>V77RF-ADFV01192039.1-trav |(82783, 83070)|2.96370067828|(0.996,0.979,0.990)|1
--VNSQQGEEDPQALTIQEGENATMNCSYKS-S---TNSLQWYRQESGRGLVHLILIRSN
EREK-HSGRLRVTLDTSKKSSSLLITASRAADTASYFCAME-----
>V78RF-ADFV01192039.1-trav |(88347, 88638)|2.98896000066|(0.997,0.994,0.998)|1
-RTNGDSVTQTEGPVTLPEQAALTLNCTYQSSY--S-TFLFWYVQYLNKAPELLLKS-SE
NQ-ETDSRGFQASHVKSDSSFHLEKPSVQLSDSAVYYCALR-----
>V80RF-ADFV01192040.1-trav |(2622, 2909)|2.32468794359|(0.905,0.676,0.937)|1
-LSGEDQVTQSPEALRLQEGENSSLICSYTVSN---LRGLLWYRQDPGKGPEFLFILYSA
GEEK-EKERLKATLTKE--ESFLHITAPKPEDSATYLCAVQ-----
>V87RF-ADFV01192042.1-trav |(56528, 56818)|2.97745609036|(0.994,1.000,0.984)|1
--TIIDAKTTQPTSMDCAEGRAANLPCNHSTIS--GNEYVYWYRQIHSQGPQYIIHGLKN
NA---TNEMASLIITEDRKSSTLILPHATLRDTAVYYCIVRV----
>V93RF-ADFV01192045.1-trav |(29460, 29750)|2.90245386218|(0.966,0.987,0.952)|1
-VSSEDKVVQSPLSLVVHEGDTVTLNCSYEVTN---FRSLLWYKQEK-KAPTFLFMLTSS
GIEK-KSGRLSGILDNRELFSILNITATETRDSAIYLCAVE-----
>V95RF-ADFV01192049.1-trav |(9724, 10024)|2.98570803341|(0.999,0.991,0.996)|1
-FSMAQTVTQSQPEMSVQEAETVTLSCTYDTTE--SDYYLFWYKQPPSRQMILIIRQEAY
KQQNATENRFSVNFQKAAKSFSLKISDSQLGDTAMYFCAYR-----
>V96RF-ADFV01192050.1-trav |(14951, 15239)|2.96069025636|(0.993,0.970,1.000)|1
-LSGELKVGQNPPFLSTQEGKNYTIYCNYST-I---SDRLYWYRQDPGKSLESLFVLLSS
GAVK-QEGRLMASLDTKARLSTLHITAAVHDLSATYFCAV------
>V193RF-AQIB01128636.1-trav |(12150, 12438)|2.97360004313|(0.992,0.984,0.998)|-1
-LSGELKVGQNPLFLSTQEGKNDTIYCNYST-A---SDRLYWYRQDPGKSLESLFVLLSN
GAVK-QEGRFMASLDTKARLSTLHITAALQDLSATYFCAV------
>V196RF-AQIB01128637.1-trav |(79553, 79853)|2.93721046559|(0.992,0.979,0.969)|-1
-SGMAQTVTQSQPEMSVREAETVTLSCTYDTSE--SYYYLFWYKQPPSRQMTLIIRQEAY
KQQNATENRFSVNFQKAAKSFSLKISDSQLGDAARYFCAYR-----
>V202RF-AQIB01128642.1-trav |(7440, 7727)|2.99498400013|(0.999,0.997,0.999)|-1
-LSGEDQVTQSPEALSLQEGESSSLNCSYTVSG---LRGLFWYRQDPGKGPEFLFSLYSA
GEEK-EKERLKATLTKK--ESFLHITGPKPEDSATYLCAVQ-----
>V203RF-AQIB01128642.1-trav |(19364, 19663)|2.22413031007|(0.851,0.632,0.985)|-1
-VSGKQEVTQIPAALSVPEGDNLVLNCSFTDSA---IYNLQWFRQDPGKGLTSLLLIQSS
QREQ-TSGRLNASLDKSSGRSTLYITASQPTDSATYLCAVRHS---
>V204RF-AQIB01128643.1-trav |(8686, 8977)|2.98996000066|(0.998,0.995,0.997)|-1
-RTNGDSVTQTEGPVTLPERAALTLNCTYQTSY--S-AFIFWYVQYPKKEPELLLKS-SE
NQ-ETNSRGFQASHVKSDSSFHLEKPSVQLSDSAVYYCVLR-----
>V205RF-AQIB01128643.1-trav |(11902, 12205)|2.9781523093|(0.999,0.995,0.985)|-1
-SSMAQKVTQAQTEISVVEKEDVTLDCVYETRE--TTYYLFWYKQPPSGELVFLIRQNSF
NEQNEINGRYSSNFQKSTSSFNLTITASQVMDSAVYFCALNE----
>V207RF-AQIB01128644.1-trav |(158071, 158361)|2.98896000066|(0.995,0.996,0.998)|-1
-MSRGDDVEQS-LFLSVREGDISVINCTYTDSS---STYLYWYKQEPGAGLQLLIYILSN
TDLK-QDQRLTVLLNKKDKHLSLRIADTQTGDSAIYFCAES-----
>V209RF-AQIB01128644.1-trav |(203408, 203702)|2.99899600001|(1.000,1.000,0.999)|-1
-GINGDSVVQTEGQVLLSEGNSLIVNCSYESTQ--Y-PSLFWYVQYPGEGPQLLLKAMKD
ND-KESNKGFEATYRKETTSFHLEKDSVQESDSAVYFCALS-----
>V210RF-AQIB01128644.1-trav |(216592, 216885)|2.96537212748|(0.983,0.989,0.994)|-1
-GSGKNQVEQSPQSLIILEGKNCTLQCNYTVSP---FSNLRWYKQDTGKGLISLTIMTFS
DNTK-SNGRYTATLDADTKQSSLYITAAQLSDSASYICVVS-----
>V211RF-AQIB01128644.1-trav |(232171, 232464)|2.99598000014|(0.999,0.997,1.000)|-1
VWGQQKEVEQNPGPLSVPEGATASLNCTYSNSA---FQYFMWYRQYSRKGPQLLIYIYSS
GNKE--DGRFTAQVDKSSKYISLFIRDSQPSDSATYFCAMS-----
>V212RF-AQIB01128644.1-trav |(237634, 237931)|2.30032859169|(0.959,0.906,0.693)|-1
-GTRAQSVTQLDSQVSVSEGVPVLLRCNYSSSF--P-PNLFWYVQYPNQGLQLLLKYISG
TALVKGINGFKAEFKKSETSFHLTKASAHVSDAAEYFCAVS-----
>V213RF-AQIB01128644.1-trav |(243150, 243447)|3.0|(1.000,1.000,1.000)|-1
-TARAQSVTQPDIHITVSEGASLELRCNYSYGA--T-PSLFWYVQSPGQGLQLLLKYFSG
DTLVQGIKGFEAEFKRSQYSFNLRKPSVHWSDAAEYFCAAG-----
>V214RF-AQIB01128644.1-trav |(257060, 257353)|3.0|(1.000,1.000,1.000)|-1
-VSRGESVGLHLPTVSVQEGDNSVINCTYSDSA---SDYFLWYKQESGKGPQSIIDIRSN
MAKR-QGQRLTVLLNKTMKHLSLQIAATEPGDSAVYFCAEN-----
>V215RF-AQIB01128644.1-trav |(262905, 263206)|2.97368883957|(0.997,0.999,0.979)|-1
-SGIAQKITQTQPAMFVQEKEAVTLDCTYDTSD--QSYGLFWYKQPSSGEMIFLIRQESY
DKQNATEGRYSLNFQKARKSVNLVISASQVEDSAMYFCAMR-----
>V216RF-AQIB01128644.1-trav |(280831, 281125)|3.0|(1.000,1.000,1.000)|-1
-RTRGDSVTQMEGPVTLSERAFLTINCTYTATG--Y-PSLFWYVQYPGEGPQLLLKAVKT
DE-KGSNKGFEATYRKETTSFHLKKDSVQESDSAVYFCALS-----
>V217RF-AQIB01128644.1-trav |(305369, 305662)|3.0|(1.000,1.000,1.000)|-1
VWSQQKEVEQNPGPLSVPEGATASLNCTYSNSA---FQYFMWYRQYSRKGPQLLIYIYSS
GNKE--DGRFTAQVDKSSKYISLFIRDSQPSDSATYFCAMS-----
>V218RF-AQIB01128644.1-trav |(340098, 340385)|2.99593600205|(1.000,1.000,0.996)|-1
--VNSQQGEEDPQTLSIQEGENATMNCSYKT-S---INNLQWYRQDSGRSLVQLTLIRSN
ERQK-NSGRLRVTLDTSKKSSSLLITASRAADTASYFCATD-----
>V2RF-CABD02105568.1-trav |(17605, 17902)|2.67059374292|(0.979,0.808,0.995)|1
-GLRAQSVAQPEDQVTVAEGNPLTVKCTYSVSG--N-PYLFWYVQYPNKGLKFLLKYITG
DNLVKGSYGFEAEFNKSQTSFHLKKPSALVSDSALYFCAVR-----
>V3RF-CABD02105570.1-trav |(17984, 18274)|2.97776801985|(0.994,0.997,0.987)|1
-MSRGEDVEQS-LFLSVQEGDSSIIKCTYTDSS---STYLYWYKQEPGAGLQLLMYIFSN
MDMK-QDQRLTVLLNKKDKHLSLRIADTQTGDSAIYFCAES-----
>V4RF-CABD02105575.1-trav |(937, 1225)|2.27122562922|(0.747,0.749,0.998)|1
--VKSQKIEQNSEALNIQEGKTATLTCNYTNYS---PAYLQWCRQDPGRGPVFLLLIREN
EKEK-RKERLKVTFDTTLKQSLFHITASQPADSATYLCAL------
>V5RF-CABD02105579.1-trav |(4709, 5003)|2.99899600001|(1.000,1.000,0.999)|1
-GINGDSVVQTEGQVLLSEGDSLIVNCSYETTQ--Y-PSLFWYVQYPGEGPQLLLKAMKA
ND-KGRNKGFEATYHKETTSFHLEKDSVQESDSAVYFCALS-----
>V6RF-CABD02105581.1-trav |(5845, 6138)|2.93677285433|(0.993,0.951,1.000)|1
-GSGKNQVEQSPQSLIILEGKNCTLRCNYTVSP---FNNLRWYKQDTGRGPVSLTIMTFS
ENTK-SNGRYTATLDADTKQSSLHITASQLSDSASYICVVS-----
>V7RF-CABD02105584.1-trav |(2822, 3110)|3.0|(1.000,1.000,1.000)|1
VWSQRKEVEQDPGPFNVPEGATVAFNCTYSNSA---SQSFFWYRQDCRKEPKLLMSVYSS
GN-E--DGRFTAQLNRASQYISLLIRDSQLSDSATYLCAV------
>V8RF-CABD02105586.1-trav |(1660, 1957)|2.9829000027|(0.994,0.991,0.998)|1
-GTRAQSVTQLDSHVSVSEGTPVLLRCNYSSSY--S-PSLFWYVQHPNKGLQLLLKYTSR
ATLVKGINGFEAEFKKSETSFHLTKPSAHMSDAAEYFCAVS-----
>V10RF-CABD02105588.1-trav |(25116, 25407)|2.99067605248|(1.000,1.000,0.991)|1
VWSQQKEVEQNSGPLSVPEGAIASLNCTYSDRR---SQSFFWYRQYSGKSPELIMSIYSN
GDKE--DGRFTAQLNKASQYVSLLIRDSQPSDSATYLCAV------
>V11RF-CABD02105589.1-trav |(20536, 20829)|2.97870083945|(0.999,0.981,1.000)|1
-VSRGESEGLHLPTLSVQEGDNSIINCAYSNSA---SDYFIWYKQESGKGPQFIIDIRSN
MDKR-QGQRVTVLLNKTVKHLSLQIAATQPGDSAVYFCAEN-----
>V12RF-CABD02105589.1-trav |(26461, 26764)|2.98270402421|(0.995,0.988,1.000)|1
-PGIAQKITQTQPGMFMQEKEAVTLDCTYDTSD--QSYGLFWYKQPSSGEMIFLIYQGSY
DQQNATEGRYSLNFQKARKSANLVISASQLGDSATYFCAMRE----
>V13RF-CABD02105590.1-trav |(3574, 3868)|3.0|(1.000,1.000,1.000)|1
-RTRGDSVTQMEGPVTLSEEAFLTINCTYTATG--Y-PSLFWYVQYPGEGLQLLLKATKA
DD-KGSNKGFEATYHKETTSFHLEKDSVQASDSAVYFCALS-----
>V14RF-CABD02105592.1-trav |(17384, 17677)|2.99496000066|(0.999,1.000,0.996)|1
VWSQQKEVEQDPGPLSVPEGAIASLNCTYSNSA---FQYFMWYRQYSRKGPELLMYTYSS
GNKE--DGRFTVQVDKSSKYISLFIRDSQPSDSATYLCAMS-----
>V15RF-CABD02105596.1-trav |(11716, 12003)|3.0|(1.000,1.000,1.000)|1
--VNSQQGEEDPQALSIQEGENATMNCSYKT-S---INNLQWYRQNSGRGLVHLILIRSN
EREK-HSGRLRVTLDTSKKSSSLLITASRAADTASYFCATD-----
>V17RF-CABD02105602.1-trav |(5884, 6171)|2.99899600001|(1.000,1.000,0.999)|1
-LSGEDQVTQSPEALRLQEGESSSLNCSYTVSG---LRGLFWYRQDPGKGPEFLFTLYSA
GEEK-EKERLKATLTKK--ESFLHITAPKPEDSATYLCAVQ-----
>V18RF-CABD02105602.1-trav |(17805, 18104)|2.93367293132|(0.986,0.958,0.993)|1
-VSSKQEVTQIPAALSVPEGENLVLNCSFTDSA---IYSLQWFRQDPGKGLTSLLLIQSS
QREQ-TSGRLNASLDKSSGHSTLYIAASQPGDSATYLCAVRHS---
>V21RF-CABD02105612.1-trav |(1576, 1866)|2.54227860323|(0.971,0.761,0.972)|1
-VNSILNVEQSPQSLHVQEGDSTNFTCSFPSSN---FYALHWYRWETAKSPEALFVMTLN
GDEK-KKGRISATLNTKEGYSYLYIKGSQPEDSATYLCAF------
>V22RF-CABD02105614.1-trav |(2102, 2401)|2.23091390683|(0.957,0.949,0.646)|1
--VNGQQVMQIPQYQHVQEGEDFTTYCNSST-T---LSNIQWYKQRPGGHPVFLIQLVKN
GEVK-KQKRLTFQFGEAKKNSSLHITATQTTDVGTYFCAGHSAPQ-
>V23RF-CABD02105615.1-trav |(7807, 8097)|2.98474002125|(0.996,1.000,0.989)|1
--TIIDAKTTQPTSMDCAEGRAANLPCNHSTIS--GNEYVYWYRQIHSQGPQYIIHGLKN
NE---TNEMASLIITEDRKSSTLILPHATLRDTAVYYCIVRV----
>V24RF-CABD02105616.1-trav |(38647, 38934)|2.27800867365|(0.914,0.654,0.953)|1
--VRSQQPVQTPQAMILREGEDAVINCSSSK----ALYSVHWYRQKHGEAPVFLMILLKG
GEQK-GHDKISASFNEKKQQSSLYLMASQLSYSGTYFCGAE-----
>V27RF-CABD02105626.1-trav |(22480, 22780)|2.99798400013|(1.000,1.000,0.998)|1
-FSMAQTVTQSQPEMSVQEAETVTLSCTYDTSE--SDYYLFWYKQPPSRQMILVIRQEAY
KQQNATENRFSVNFQKAAKSFSLKISDSQLGDAAMYFCAYR-----
>V28RF-CABD02105628.1-trav |(15554, 15842)|2.9949000027|(0.996,0.999,1.000)|1
-LSGELKVGQNPLFLSTQEGKNYTIYCNYST-T---SDRLYWYKQDPGKSLESLFVLLSN
GAVK-QEGRLMASLDTKARLSSLHITAAVHDLSATYFCAV------
>V47RF-ABDC01377653.1-trav |(1660, 1950)|2.96594800078|(0.987,0.989,0.990)|1
-MSRGEKLEQS-PFLSVQEGDSSVINCTYTETT---STYFYWYKQGPREGLQLIMTIFSY
EDKK-QERRLSVLLNKMEKHLSLHISDTQPADSAVYFCAVS-----
>V48RF-ABDC01377655.1-trav |(2230, 2518)|2.36805337278|(0.750,0.838,0.849)|1
--VHSQKIEQNPWALSIQEGETAAVTCNYTSYS---PAFFQWYRQDPEKGLVFLLLIREN
EGEK-QEGRLKVTFDTKLKQSSFYIADSQPADSAAYLCAA------
>V50RF-ABDC01379531.1-trav |(895, 1198)|2.94684837921|(0.993,0.961,0.997)|1
-SGMAQKVTQSQPAMWVQEKEAVTLDCTYDTRD--STYYLFWYKQPSSGEMILLIRQDSY
NQQNATEGRYSLNFQKASKSIKLVISASQVGDSAIYFCALSE----
>V51RF-ABDC01379531.1-trav |(6655, 6946)|2.9929000027|(1.000,0.996,0.997)|1
VRSQQKEVDQTPEFLSVSEGAMASLNCTYSNTA---SRYFFWYRQYSGKGPELLVSIFST
GDKQ--EGRFTAQLNKASRYVSLVIRDSQPSDSATYLCAL------
>V54RF-ABDC01388284.1-trav |(3312, 3602)|2.94876429988|(0.990,0.963,0.999)|1
-VRSQQVVEQTPESLVVSEGTTASLSCTYSDTA---SQSFLWYRQYSGKGPELLMFIYST
GDKE--EGRFTAQLNKASRNVSLLIRDSQPSDSATYLCAVS-----
>V55RF-ABDC01388284.1-trav |(7133, 7430)|2.56461051925|(0.891,0.829,0.863)|1
-GTWAQRVTQPDGHITVSEGDPLELRCNYSSSV--S-PYLFWYVQYPNQGLELLLKYTSG
NSLVTGIKSFKAEFNKGETSFHLKKASAHLSDSAQYFCAVS-----
>V74RF-ABDC01418428.1-trav |(328, 621)|2.97295304822|(0.981,0.997,0.997)|1
-VRGGENVGLHPPTLSVQEGDTSVINCSYSDSA---SSYLLWYKQKLGKSPQSIIDIRSN
MGKK-QKGRFTVFLSKTAKHLSLHIAATQPGDSAVYFCAES-----
>V80RF-ABDC01440241.1-trav |(2301, 2594)|2.50459485347|(0.865,0.759,0.960)|1
-VRGGENVGLHPPTLSVQEGDTSVINCSYSNSA---SIYFSWYKKELGKGPQFIIDIRSN
RDKK-EEQRFTIFVNKTVKHLSLHIAGTQPGDSAVYFCAES-----
>V91RF-ABDC01491653.1-trav |(356, 647)|2.9929000027|(1.000,0.996,0.997)|1
VRSQQKEVDQTPEFLSVSEGAMASLNCTYSNTA---SRYFFWYRQYSGKGPELLVSIFST
GDKQ--EGRFTAQLNKASRYVSLVIRDSQPSDSATYLCAL------
>V100RF-ABDC01533414.1-trav |(231, 518)|2.57583704999|(0.831,0.878,0.889)|1
--VNSQQGEENLQALSIQEGENATINCSYTS-S---INNLQWYRQDAGRGPTLLILIRAN
KREE-RHGRLTATLNPSIKSSSLIITASCAADTATYFCATD-----
>V101RF-ABDC01533415.1-trav |(1221, 1515)|2.98492000218|(0.993,0.997,0.995)|1
-GTDGDSVTQTEGPVTLPEGEALTLNCTYQSNY--A-AFLFWYVQFQNKEPELLLKSSSE
TQ-ETDGRGFQANNNKSDSSFHLKKPSVQLSDSAVYFCAMR-----
>V102RF-ABDC01542818.1-trav |(328, 615)|2.96148712253|(0.997,0.972,0.995)|1
-VSSEDKVVQSPPSMAVHEGDSATLTCNYVVSY---FRSLQWYKQEK-NAPVFLFTLTSS
GIEK-KSGRFSSILDNKEL-STLNITATQTGDSAIYFCAVE-----
>V128RF-ABDC01454736.1-trav |(1674, 1968)|2.97719216959|(0.986,0.997,0.995)|-1
-RTHGNSVTQTEGQVTLSEKAFLHINCTYTSTG--Y-PSLFWYVQYPGEGPQLLLKAATA
ND-KGMNKGFEATYKKETTSFHLEKASVHESDSAVYYCAMS-----
>V33RF-JZKE01143868.1-trav |(15192, 15493)|2.94692000218|(0.983,0.985,0.979)|-1
-SSVAQTVTQSQPEMSVQEAGTVTLDCTYATSD--SNYYLFWYKQPPSRQMILIIRQEAY
KQQNATENRFSVNFQKAAKSFSLEISDSQLEDAAMYFCAFM-----
>V34RF-JZKE01143869.1-trav |(6274, 6564)|2.97775601537|(0.989,0.994,0.995)|-1
-VSSEDKVIQSPSSLAVHEGDSATLTCNYEVSY---FQSLQWYKQEK-NAPTFLFTLTSS
GIEK-KSGRLSSILDNKELLSTLNITATQTRDSAIYFCAVE-----
>V46RF-JZKE01143890.1-trav |(1103, 1400)|2.99199600001|(0.997,0.998,0.997)|-1
-RSNGDSVTQTEGTVTLPEGAPVILNCTYETTY--SVSYLFWYVQYLNQSPQLLLKSSTE
NQ-RGENRGFQANLVKSDKSFHLEKSSLRMSDSAVYYCALS-----
>V48RF-JZKE01143891.1-trav |(8677, 8980)|2.98202424585|(0.987,0.997,0.999)|-1
-PSMAQKVTQAQPEISVVEKESVTLDCVYETRD--PTYYLFWYKQPPSGEMIFLIRQDSF
NEKNETKDRYFLNLQKSTSSISLTITASQLMDSAVYFCALRE----
>V49RF-JZKE01143893.1-trav |(6613, 6900)|2.95098000014|(0.984,0.985,0.982)|-1
--VNSQQGEENPQALSIQEGENATINCSYKS-S---ISNLQWYRQDSGRGLTLLILIRAN
KREE-HHGRLTVTLNTSIKSSSLIITASCAADSATYFCATD-----
>V50RF-JZKE01143895.1-trav |(12286, 12579)|2.88979292281|(0.981,0.924,0.999)|-1
-VSGGENVGLHPPTLNVQEGDTSVINCTYSNSA---SNYFPWYKQELGKGPQFIIDIRSN
MDNK-QEQRFTVLLNKTAKHLSLHIAGTQAGDSAVYFCAES-----
>V51RF-JZKE01143895.1-trav |(15624, 15933)|2.99799600001|(0.999,1.000,0.999)|-1
-AGIAQKVTQSQPAMSVQEKEAVTLDCTYDTSTSVTSYTLFWYKQPSSGEMILLIRQDSY
NQQNATEGRYSLNFQKASKSIKLVISASQVGDSAIYFCALSE----
>V52RF-JZKE01143895.1-trav |(22481, 22772)|2.991|(0.997,0.997,0.997)|-1
VRSQQKEVEQTPESLSVSEGATASLNCTYSNTA---SQYFTWYRQYSGKGPELLVSIYSN
GDKE-E-ERFTVHLNMASRYVSLLIRDSQPSDSATYLCAV------
>V54RF-JZKE01143896.1-trav |(1244, 1537)|2.96845211916|(0.992,0.981,0.996)|-1
-VRGGENMGLHPPNLSVQEGDTSVINCTYSNSN---SDYFCWYKQEPGKGPQFIMDIRSN
KDKK-QEGRFTILLNKMAKHLSLHIAGTQAGDSAAYLCAES-----
>V55RF-JZKE01143896.1-trav |(8327, 8630)|2.98767605248|(0.999,0.990,0.999)|-1
-SGIAQKVTQVQPAMLVQEKEAVTLDCTYDTSD--SRYTLFWYKQPSSGEMLLLIRQDSY
NQQNATEGRYSLNFQKANKSIKLVISASQVGDSAIYFCALME----
>V56RF-JZKE01143896.1-trav |(15626, 15938)|2.96428365264|(0.997,0.999,0.971)|-1
VRSQQKEVEQTPESLSVSEGATASLNCTYSNTA---SQYFAWYRQYSGKGPELPVSIYST
GDKE-EEGRFTVQLNKGSRYVSLLIRDSQPSDSATYLCAVSTQCSP
>V57RF-JZKE01143902.1-trav |(453, 744)|2.98996800026|(0.998,0.996,0.996)|-1
VRSQQKEVEQTPESLSVSEGATASLNCTYSNTA---SQYFAWYRQYSGKGPELLVFIYST
GDKE-E-GRFTVQLNKASRYVSLLIRDSQPSDSATYLCAV------
>V58RF-JZKE01143903.1-trav |(641, 935)|2.9909280013|(0.995,0.998,0.998)|-1
-RTHGDSVTQMEGQVTLSEEAFLTINCTYTATG--Y-PALFWYVQYPGEGPQLLLKATKA
ND-KGINKGFEATYKRETTSFHLEKASVHESDSAVYYCALS-----
>V59RF-JZKE01143910.1-trav |(6899, 7192)|2.93374224752|(0.973,0.967,0.996)|-1
-VSGKNQVEQGPQSLIIPEGENCTLQCNYTVSP---FNNLRWYKQETGRGPVSLIIMNYS
KSKE-SNGRYTATLDASAKQSSLHITASQLSDSASYICVAS-----
>V61RF-JZKE01143910.1-trav |(50038, 50331)|2.7269732542|(0.988,0.833,0.998)|-1
-VSGGENVGLHPPTLNVQEGDTSVINCTYSDSA---SIYFPWYKQELGKGPQFITDIRSN
MDNK-QEQRFTVLLNKTAKHLSLHIAGTQAGDSAVYFCAES-----
>V62RF-JZKE01143910.1-trav |(57835, 58138)|2.99174403277|(1.000,0.992,1.000)|-1
-AGVAQKVTQSQPAMLVQEKEAVTLDCTYDTSD--SSYGLFWYKQPSSGEMLLLIRQDSY
NQQNATEGRYSLNFQKARKSIHLVISALQLGDSAIYFCALSE----
>V63RF-JZKE01143913.1-trav |(1691, 1985)|2.5984018452|(0.842,0.851,0.994)|-1
-RTYGNTVTQGEGQVTLSEGAFLTINCTYTSTG--Y-PTLFWYVQYPGEGPQLFLKATQA
ND-KAINKGFEATYKRETTSFHLEKASVHESDSAMYYCVLS-----
>V65RF-JZKE01143915.1-trav |(12659, 12952)|2.95882119202|(0.976,0.993,0.992)|-1
-VSRGENVEQRPSTLHVQEGDTSVINCTYSDSA---SSYFPWYKQELGKGPQLFIDIRSN
LDKK-QDQRITLLLNRMTKHLSLHIAATQPGDSAVYFCVAS-----
>V70RF-JZKE01143916.1-trav |(38882, 39172)|2.96697252412|(0.995,0.979,0.994)|-1
-ISRGEKVEQS-PFLSVQEGDSSVINCTYTEST---STYFYWYKQGPGEGPQLLMTILSS
MDKK-QEQRLSVLLNKREKHLSLHISDTQPGDSAVYFCAVS-----
>V71RF-JZKE01143916.1-trav |(40477, 40765)|2.94994028297|(0.976,0.987,0.988)|-1
--VNSQKIEQNPRALNIHEGETAAVTCNYTSYS---PAFLQWYRQDPERGLVFLLLIREN
EGEK-QEGRLKVTFDTTHKQSSFYITDSQPADSATYLCAA------
>V72RF-JZKE01143916.1-trav |(59581, 59872)|2.98770402421|(0.992,0.997,0.999)|-1
--SHGDSVTQTDGQMLLTEGDSLIVNCSYETRQ--Y-PALFWYVQYPGEGLQLLLKAAKA
ND-KGINKGFEATYNRETTSFHLEKASVHVSDSAVYYCALS-----
>V55RF-JYKQ01054925.1-trav |(5041, 5338)|2.90424535942|(0.994,0.931,0.995)|1
-GLRAQLVTQPEDQVTVAEGNPLTVKCTYSVSG--N-PYLFWYVQYPNQGLQFLLKYITG
DNLVKGSYGFEAEFNKSQTSFHLKKPSALVSDSALYFCAVR-----
>V56RF-JYKQ01054933.1-trav |(11630, 11920)|2.99598000014|(0.999,1.000,0.997)|1
-MSRGEDVEQS-LFLSVREGDISVINCTYTDSS---STYLYWYKQEPGAGLQLLIYILSN
MDLK-RDQRVTVLLNKKDKHLSLRIADTQTEDSAIYFCAES-----
>V57RF-JYKQ01054940.1-trav |(18103, 18397)|2.99899600001|(1.000,1.000,0.999)|1
-GINGDSVVQTEGQVLLSEGNSLIVNCSYESTQ--Y-PSLFWYVQYPGEGPQLLLKAMKD
ND-KESNKGFEATYRKETTSFHLEKDSVQESDSAVYFCALS-----
>V58RF-JYKQ01054940.1-trav |(31345, 31638)|2.99392000218|(0.996,0.998,1.000)|1
-GSGKNQVEQSPQSLIILEGKNCTLQCNYTVSP---FNNLRWYKQDTGKGPISLTIMTFS
ENTK-SNGRYIATLDADTKQSSLHITAAQLSDSASYICVVS-----
>V59RF-JYKQ01054940.1-trav |(46970, 47276)|2.99174403277|(1.000,1.000,0.992)|1
VWSQQKEVEQDPGPFSVPEGATVTFNCTYSNSA---SQSFFWYRQDSRKEPKLLMSAYSS
GN-E--DGRFTAQLNRASQYISLLIRDSQLSDSATYLCAVYTQCSP
>V60RF-JYKQ01054940.1-trav |(52430, 52727)|2.97097652411|(0.996,0.980,0.996)|1
-GTRAQSVTQLDSQVSVSEGAPVLLRCNYSSSV--P-PYLFWYVQYPNQGLQLLLKYTSG
TTLVKGINGFEAEFKKSETSFHLRKASAHVSDAAEYFCAVS-----
>V61RF-JYKQ01054942.1-trav |(16188, 16478)|2.98442416586|(0.999,0.987,0.999)|1
--VNGENVEQHPSILSVQEGDSSVIKCTYSDSA---SNYFPWYKQELGKEPQFIIDIRSN
AHEK-KDQRITVLLNKTAKHFSLHITETQPGDSAVYFCAAS-----
>V62RF-JYKQ01054942.1-trav |(38704, 38992)|2.99899600001|(1.000,0.999,1.000)|1
VWSQQ-KVEQNSGPLSVPEGAIASLNCTYSDRG---SQSFFWYRQYSGQSPELLMSTYSS
GDKE--DGRFTAQLNRASQYVSLLIRDSQPSDSATYLCAV------
>V63RF-JYKQ01054942.1-trav |(45190, 45487)|2.71929316693|(0.971,0.831,0.995)|1
-GTKAQSVTQLDSQVSVSEGVPVLLRCNYSSSF--P-PTLFWYVQYPNQGLQLLLKYTSG
TTLVKGINGFEAEFKKSETSFHLTKASAHVSDAAEYFCAVN-----
>V64RF-JYKQ01054942.1-trav |(64627, 64920)|2.98521630725|(1.000,1.000,0.986)|1
-VSRGESVGLHLPTVSVQEGDNSVINCTYSDSA---SDYFLWYKQESGKGPQSIIDIRSN
MAKR-QGQRLTVFLNKTMKHLSLQIAATEPGDSAVYFCAEN-----
>V65RF-JYKQ01054942.1-trav |(70517, 70818)|2.91572292008|(1.000,0.999,0.934)|1
-SGIAQKITQTQPAMFVQEKEAVTLDCTYDTSD--QSYGLFWYKQPSSGEMIFLILQMSY
DKQNATEGRYSLNFQKARKSVNLVISASQVGDSAMYFCAMR-----
>V66RF-JYKQ01054942.1-trav |(88856, 89150)|3.0|(1.000,1.000,1.000)|1
-RTRGDSVTQMEGPVTLSERAFLTINCTYTATG--Y-PSLFWYVQYPGEGPQLLLKATKT
DE-KGSNKGFEATYRKETTSFHLKKDSVQESDSAVYFCALS-----
>V67RF-JYKQ01054942.1-trav |(113522, 113815)|2.99899200002|(0.999,1.000,1.000)|1
VWSQQKEVEQNPGPLSVPEGATASLNCTYSNSA---FQYFMWYRQYSRKGPQLLIYIYSS
GNKE--DGRFTAQVDKSSKYISLFIRDSQPNDSATYFCAMS-----
>V69RF-JYKQ01054953.1-trav |(3497, 3784)|3.0|(1.000,1.000,1.000)|1
--VNSQQGEEDPQTLSIQEGENATMNCSYKT-S---INNLQWYRQDSGRSLVQLILIRSN
EREK-NSGRLRVTLDTSKKSSSLLITASRAADTASYFCATD-----
>V70RF-JYKQ01054957.1-trav |(3986, 4277)|2.99399200002|(0.998,0.999,0.997)|1
-RTNGDSVTQTEGPVTLPERAALTLNCTYQTSY--S-AFIFWYVQYPNKEPELLLKS-SE
NQ-ETNSRGFQASHVKSDSSFHLEKPSVQLSDSAVYYCVLR-----
>V71RF-JYKQ01054957.1-trav |(7206, 7509)|2.95284837921|(0.995,0.999,0.963)|1
-SSMAQKVTQAQTEISVVEKEDVTLDCVYETRD--TTYYLFWYKQPPSGELVFLIRQNSF
DEQNEINGRYYSKFQKSTSSFNLTITASQVVDSAVYFCALNE----
>V72RF-JYKQ01054957.1-trav |(42945, 43232)|2.9057880379|(0.985,0.976,0.950)|1
-LSGEDQVTQSPEALSLQEGDSSSLNCSYTVSG---LRGLLWYRQDPGKGPEFLFILYSA
GEEK-EKERLKATLTKK--ESFLHITGPKPEDSATYLCAVQ-----
>V120RF-JYKQ01135388.1-trav |(4501, 4803)|3.0|(1.000,1.000,1.000)|1
-SGMAQTVTQSQPEMSVQEAETVTLSCTYDTSE--SNYYLFWYKQPPSRQMILIIRQEAY
KQQNATENRFSVNFQKATKSFSLKISDSQLGDAAMYFCAYRS----
>V121RF-JYKQ01135389.1-trav |(2804, 3092)|3.0|(1.000,1.000,1.000)|1
-LSGELKVGQNPLFLSTQEGKNYTIYCNYST-A---SDRLYWYRQDPGKSLESLFVLLSN
GAVK-QEGRLMASLDTKARLSSLHITAALQDLSATYFCAV------
>V162RF-JYKQ01026643.1-trav |(15229, 15519)|2.45167677197|(0.875,0.736,0.925)|-1
-VSSEDKVMQNPLSLVVHEGDTVTLNCSYEVAN---FRSLLWYKQEK-KAPIFLFTLTSS
GIEK-KSGRLSSILDKKDLYSILNITATQTRDSAVYLCAVE-----
>V165RF-JYKQ01026655.1-trav |(5208, 5498)|2.46253104629|(0.893,0.793,0.831)|-1
--TIIDAKTTQPTSMDCAEGRAANLPCNHSTIS--GSEYVYWYRQIHSQEPQYVIHGLKN
NE---TNVMASLIITEDRKSSTLILPHATLRDTAVYYCIVRG----
>V166RF-JYKQ01026663.1-trav |(902, 1202)|2.89902032645|(0.969,0.976,0.955)|-1
-SSVAQKVTQTQSSVSMPVEKAVTLNCQYETSR--WSYYLFWYKQPPSKEMIFLIRQ-GS
SEPNAKSGRYSVNFQKAASSIALTISALQLEDSATYFCALWE----
>V167RF-JYKQ01026665.1-trav |(1710, 2010)|2.44251226488|(0.894,0.795,0.816)|-1
-SSVAQKVTQAQSSVSMPVGKAVTLNCQYETSW--WSYDLFWYKQPPSKEMIFLIRQ-GY
SEQNARNGRYSVNFQKAASSIALTISALQLEDSATYFCALRE----
>V204RF-JYKQ01066669.1-trav |(750, 1050)|2.44251226488|(0.894,0.795,0.816)|-1
-SSVAQKVTQAQSSVSMPVGKAVTLNCQYETSW--WSYDLFWYKQPPSKEMIFLIRQ-GY
SEQNARNGRYSVNFQKAASSIALTISALQLEDSATYFCALRE----
>V57RF-AACZ03095312.1-trav |(40528, 40815)|2.92603223422|(0.983,0.972,0.972)|1
--VRSQQPVQSPQAVILREGEDAVINCSSSK----ALYSVHWYRQKHGEAPVFLMMLLKG
GEQK-GHDKISASFNEKKQQSSLYLMASQLSYSGTYFCGAE-----
>V58RF-AACZ03095314.1-trav |(457, 747)|3.0|(1.000,1.000,1.000)|1
-VSSEDKVVQSPLSLVVHEGDTVTLNCSYEVTN---FQSLLWYKQEK-KAPTFLFMLTSS
GIEK-KSGRLSSILDKKELFSILNITATQTGDSAIYLCAVE-----
>V60RF-AACZ03095317.1-trav |(36941, 37243)|3.0|(1.000,1.000,1.000)|1
-FSMAQTVTQTQPEMSVQEAETVTLSCTYDTSE--SDYYLFWYKQPPSRQMILVIRQEAY
KQQNATENRFSVNFQKAAKSFSLKISDSQLGDAAMYFCAYRS----
>V61RF-AACZ03095319.1-trav |(17030, 17318)|2.99494800078|(1.000,0.997,0.998)|1
-LSGELKVEQNPLFLSTQEGKNYTIYCNYST-T---SDRLYWYRQDPGKSLESLFVLLSN
GAVK-QEGQLMASLDTKARLSTLHITAAVHDLSATYFCAV------
>V65RF-AACZ03097612.1-trav |(9441, 9731)|2.99899600001|(1.000,0.999,1.000)|1
-MSRGEDVEQS-LFLSVREGDSSVINCTYTDSS---STYLYWYKQEPGAGLQLLTYIFSN
MDMK-QDQRLTVLLNKKDKHLSLRIADTQTGDSAIYFCAES-----
>V66RF-AACZ03097613.1-trav |(2901, 3189)|3.0|(1.000,1.000,1.000)|1
--VKSQKIEQNSEALNIQEGKTATLTCNYTNYS---PAYLQWYRQDPGRGPVFLLLIREN
EKEK-RKERLKVTFDTTLKQGVFHITASQPADSATYLCAL------
>V67RF-AACZ03097613.1-trav |(17275, 17562)|2.99496000066|(0.999,0.996,1.000)|1
-ANGENQVEHSPHFLGPQQGDVASMSCTYSVSR---FNNLQWYRQNTGMGPKHLLSMYSA
GYEK-QKGRLNATLLKN--GSSLYITAVQPEDSATYFCAVD-----
>V68RF-AACZ03097613.1-trav |(45730, 46024)|3.0|(1.000,1.000,1.000)|1
-GINGDSVVQTEGQVLLSEGDSLIVNCSYETTQ--Y-PSLLWYVQYPGEGPQLLLKAMKA
ND-NGRNKGFEATYRKETTSFHLEKDSVQESDSAVYFCALS-----
>V69RF-AACZ03097613.1-trav |(59820, 60113)|3.0|(1.000,1.000,1.000)|1
-GSGKNQVEQSPQSLIILEGKNCTLQCNYTVSP---FNNLRWYKQDTGRGPVSLTIMTFS
ENTK-SNGRYTATLDADTKQSSLHITASQLSDSASYICVVS-----
>V70RF-AACZ03097613.1-trav |(75553, 75841)|3.0|(1.000,1.000,1.000)|1
VWSQRKEVEQDPGPFNVPEGATVAFNCTYSNSA---SQSFFWYRQDCRKEPKLLMSVYSS
GN-E--DGRFTAQLNRASQYISLLIRDSKLSDSATYLCAV------
>V71RF-AACZ03097613.1-trav |(86767, 87064)|2.99389600501|(1.000,0.995,0.999)|1
-TVRAQSVTQPDIHITVSEGASLELRCNYSYGA--T-PSLFWYVQSPGQGLQLLLKYFSG
DTLVQGIKGFEAEFKRSQSSFNLRKPSVHWSDAAEYFCAVG-----
>V72RF-AACZ03097614.1-trav |(12294, 12584)|2.99296000066|(0.999,0.998,0.996)|1
--VNGENVEQHPSTLSVQEGDGAVIKCTYSDSA---SNYFPWYKQELGKGPQLIIDIHSN
MGEK-KDQRIAVTLNKTAKHFSLHITETQPEDSAVYFCAAS-----
>V73RF-AACZ03097614.1-trav |(31772, 32063)|2.98798000014|(0.997,0.996,0.995)|1
VWSQQKEVEQNSGPLSVPEGAIVSLNCTYSDRR---SQSFFWYRQYSGKSPELIMSIYSN
GDEE--DGKFTAQLNKASQYVSLLIRDSQPSDSATYLCAV------
>V74RF-AACZ03097614.1-trav |(38270, 38567)|3.0|(1.000,1.000,1.000)|1
-GTRAQSATQLDSHVSVSEGALVLLRCNYSSSV--P-PYLFWYVQYPNQGLQLLLKYTTG
ATLVKGINGFEAEFKKSETSFHLTKPSAHVNDAAEYFCAVS-----
>V76RF-AACZ03097618.1-trav |(4827, 5130)|3.0|(1.000,1.000,1.000)|1
-PGIAQKITQTQPGMFVQEKEAVTLDCTYDTSD--QSYGLFWYKQPSSGEMIFLIYQGSY
DQQNATEGRYSLNFQKARKSANLVISASQLGDSAMYFCAMKE----
>V77RF-AACZ03097618.1-trav |(21644, 21938)|3.0|(1.000,1.000,1.000)|1
-RTRGDSVTQMEGPVTLSEEAFLTINCTYTATG--Y-PSLFWYVQYPGEGLQLLLKATKA
DD-KGSNKGFEATYRKETTSFHLEKDSVQASDSAVYFCALS-----
>V78RF-AACZ03097619.1-trav |(24003, 24296)|3.0|(1.000,1.000,1.000)|1
VWSQQKEVEQDPGPLSVPEGAIASLNCTYSNSA---FQYFMWYRQYSRKGPELLMYTYSS
DNKE--DGRFTAQVDKSSKYISLFIRDSQPSDSATYLCAMS-----
>V80RF-AACZ03097619.1-trav |(56042, 56329)|2.99899200002|(0.999,1.000,1.000)|1
--VNSQQGEEDPQALSIQEGENAIMNCSYKT-S---INNLQWYRQNSGRGLVHLILIRSN
EREK-HSGRLRVTLDTSKKSSSLLITASRAADTASYFCATD-----
>V82RF-AACZ03097619.1-trav |(99749, 100036)|2.98742416586|(1.000,1.000,0.988)|1
-LSGEDQVTQSPEALRLQEGESSSLNCSYTVSG---LRGLFWYRQDPGKGPEFLFALYSA
GEEK-EKERLKATLTKK--ESFLHITAPKPEDSATYLCAVQ-----
>V86RF-AACZ03097622.1-trav |(17372, 17662)|2.22615921514|(0.981,0.642,0.972)|1
-VSSILNVEQSPQSLHVQEGDSTNFTCSFTSSN---FYALHWYRWETAKSPEALFVMTLN
GDEK-KKGRISATLNTKEGYSYLYIKGSQPEDSATYLCAF------
>V87RF-AACZ03097624.1-trav |(2805, 3104)|2.24986913738|(0.982,0.949,0.661)|1
--VNGQQVMQIPQYQHVQEGEDFTTYCNSST-T---LSNIQWYKQRPGGHPVFLIQLVKS
GEVK-KQKRLTFQFGEAKKNSSLHITATQTTDVGTYFCAGHSAPQ-
>V88RF-AACZ03097624.1-trav |(14019, 14309)|2.24564394251|(0.912,0.634,0.989)|1
--TIIDAKTTQPTSMDCAEGRAANLPCNHSTIS--GNEYIHWYRQIHSQGPQYIIHGLKN
NE---TNEMASLIITEDRKSSTLILPHATLRDTAVYYCIVRV----
>V166RF-AACZ03171395.1-trav |(594, 882)|3.0|(1.000,1.000,1.000)|1
--VKSQKIEQNSEALNIQEGKTATLTCNYTNYS---PAYLQWYRQDPGRGPVFLLLIREN
EKEK-RKERLKVTFDTTLKQGVFHITASQPADSATYLCAL------
>V198RF-AACZ03171059.1-trav |(889, 1176)|2.25070503159|(0.918,0.644,0.953)|-1
--VRSQQPVQSPQAMILREGEDAVVNCSSSK----ALYSVHWYRQKHGEAPIFLMILLKG
GEQK-GHDKISASFNEKKQQSSLYLMASQLSYSGTYFCGAE-----
>V200RF-AACZ03171149.1-trav |(1638, 1925)|2.99294800078|(0.998,1.000,0.995)|-1
-VSSEDKVVQSPLSLVVHEGDTVTLNCSYEVTN---FQSLLWYKQEK-KAPTFLFMLTSS
GIEK-KSGRLSSILDKKELFSILNT-ATQTGDSAIYLCAVE-----
>V201RF-AACZ03171512.1-trav |(590, 893)|2.99899600001|(1.000,0.999,1.000)|-1
-PGIAQKITQTQPGMFVQEKEAVTLDCTYDTSD--PSYGLFWYKQPSSGEMIFLIYQGSY
DQQNATEGRYSLNFQKARKSANLVISASQLGDSAMYFCAVRE----
>V202RF-AACZ03171676.1-trav |(1205, 1504)|2.24986913738|(0.982,0.949,0.661)|-1
--VNGQQVMQIPQYQHVQEGEDFTTYCNSST-T---LSNIQWYKQRPGGHPVFLIQLVKS
GEVK-KQKRLTFQFGEAKKNSSLHITATQTTDVGTYFCAGHSAPQ-
>V212RF-AACZ03179105.1-trav |(33413, 33703)|2.34433376522|(0.899,0.673,0.989)|-1
--TIIDAKTTQSTSMDCAEGRAANLPCNHSTIS--GNEYIHWYRQIHSQGPQYIIHGLKN
NE---TNEMASLIITEDRKSSTLILPHATLRDTAVYYCIVRV----
>V54RF-AJFE01069975.1-trav |(15309, 15599)|3.0|(1.000,1.000,1.000)|1
-MTRGEDVEQS-LFLSVREGDSSVINCTYTDSS---STYLYWYKQEPGAGLQLLTYIFSN
MDMK-QDQRLTVLLNKKDKHLSLRIADTQTGDSAIYFCAES-----
>V55RF-AJFE01069975.1-trav |(34873, 35161)|3.0|(1.000,1.000,1.000)|1
--VKSQKIEQNSEALNIQEGKTATLTCNYTNYS---PAYLQWYRQDPGRGPVFLLLIREN
EKEK-RKERLKVTFDTTLKQGVFHITASQPADSATYLCAL------
>V56RF-AJFE01069975.1-trav |(49199, 49486)|2.98894800078|(0.998,0.996,0.995)|1
-ANGENQVEHSPHFLGPQQGDVASMSCTYSVSR---FNNLQWYRQNTGMGPKHLLSMYSA
GYEK-QKGRLNAILLKN--GSSLYITAVQPEDSATYFCAVD-----
>V58RF-AJFE01069975.1-trav |(77622, 77916)|2.99798400013|(1.000,0.998,1.000)|1
-GINGDSVVQTEGQVLLSEGDSLIVNCSYETTQ--Y-PSLLWYVLYPGEGPQLLLKAMKA
ND-NGRNKGFEATYRKETTSFHLEKDSVQESDSAVYFCALS-----
>V59RF-AJFE01069975.1-trav |(91696, 91989)|2.99796800026|(0.998,1.000,1.000)|1
-GSGKNQVEQSPQSLIILEGKNCTLQCNYTVSP---FNNLRWYKQDTGRGPVSLTIMTFS
ENTK-SNGRYTATLDADTKKSSLHITASQLSDSASYICVVS-----
>V60RF-AJFE01069975.1-trav |(107426, 107714)|3.0|(1.000,1.000,1.000)|1
VWSQRKEVEQDPGPFNVPEGATVAFNCTYSNSA---SQSFFWYRQDCRKEPKLLMSVYSS
GN-E--DGRFTAQLNRASQYISLLIRDSKLSDSATYLCAV------
>V61RF-AJFE01069975.1-trav |(118638, 118935)|2.99389600501|(1.000,0.995,0.999)|1
-TVRAQSVTQPDIHITVSEGASLELRCNYSYGA--T-PSLFWYVQSPGQGLQLLLKYFSG
DTLVQGIKGFEAEFKRSQSSFNLRKPSVHWSDAAEYFCAVG-----
>V62RF-AJFE01069975.1-trav |(134910, 135200)|2.99392000218|(1.000,0.998,0.996)|1
--VNGENVEQHPSTLSVQEGDGAVIKCTYSDSA---SNYFPWYKQELGKGPQLIIDIRSN
MGEK-KDQRIAVTLNKTAKHFSLHITETQPEDSAVYFCAAS-----
>V63RF-AJFE01069975.1-trav |(154372, 154663)|2.99699200002|(0.999,1.000,0.998)|1
VWSQQKEVEQNSGPLSVPEGAIASLNCTYSDRR---SQSFFWYRQYSGKSPELIMSIYSN
GDEE--DGRFTAQLNKASQYVSLLIRDSQPSDSATYLCAV------
>V64RF-AJFE01069975.1-trav |(160863, 161160)|3.0|(1.000,1.000,1.000)|1
-GTRAQSATQLDSHVSVSEGALVLLRCNYSSSV--P-PYLFWYVQYPNQGLQLLLKYTTG
ATLVKGINGFEAEFKKSETSFHLTKPSAHVNDAAEYFCAVS-----
>V65RF-AJFE01069976.1-trav |(18238, 18531)|2.99593600205|(1.000,0.996,1.000)|1
-VSRGESVGLHLPTLSVQEGDNSIINCAYSNSA---SDYFIWYKQESGKGPQFIIDIRSN
MDKR-QGQRVTVLLNKTVKHLSLQIAATQPGDSAVYFCAEN-----
>V66RF-AJFE01069976.1-trav |(24122, 24425)|2.99899600001|(1.000,0.999,1.000)|1
-PGIAQKITQTQPGMFVQEKEAVTLDCTYDTSD--PSYGLFWYKQPSSGEMIFLIYQGSY
DQQNATEGRYSLNFQKARKSANLVISASQLGDSAMYFCAVRE----
>V67RF-AJFE01069976.1-trav |(40935, 41229)|3.0|(1.000,1.000,1.000)|1
-RTRGDSVTQMEGPVTLSEEAFLTINCTYTATG--Y-PSLFWYVQYPGEGLQLLLKATKA
DD-KGSNKGFEATYRKETTSFHLEKDSVQASDSAVYFCALS-----
>V68RF-AJFE01069976.1-trav |(65330, 65623)|2.99594800078|(0.997,1.000,0.999)|1
VWSQQKEVEQDPGPLSVPEGAIASLNCTYSNSA---FQYFMWYRQYSRKGPELLMYTYSS
GNKE--DGRFIAQVDTSSKYISLFIRDSQPSDSATYLCAMS-----
>V70RF-AJFE01069976.1-trav |(97788, 98075)|2.99899200002|(0.999,1.000,1.000)|1
--VNSQQGEEDPQALSIQEGENAIMNCSYKT-S---INNLQWYRQNSGRGLVHLILIRSN
EREK-HSGRLRVTLDTSKKSSSLLITASRAADTASYFCATD-----
>V72RF-AJFE01069977.1-trav |(1078, 1365)|2.99899600001|(1.000,1.000,0.999)|1
-LSGEDQVTQSPEALRLQEGESSSLNCSYTVSG---LRGLFWYRQDPGKGPEFLFTLYSA
GEEK-EKERLKATLTKK--ESFLHITAPKPEDSATYLCAVQ-----
>V73RF-AJFE01069977.1-trav |(12990, 13289)|2.41332097845|(0.897,0.702,0.988)|1
-VSSKQEVTQIPAALSVPEGDNLVLNCSFTDSA---IYSLQWFRQDPGKGLTSLLLIQSS
QREQ-TSGRLNASLDKSSGRSTLYIAASQPGDSATYLCAVRHS---
>V86RF-AJFE01010527.1-trav |(11555, 11845)|2.9338222392|(0.985,0.962,0.989)|-1
-VSSILNVEQSPQSLHVQEGDSTNFTCSFPSSN---FYALHWYRWETAKSPEALFVMTLN
GDEK-KTGRISATLNTKEGYSYLYIKGSQPEDSATYLCAF------
>V113RF-AJFE01024276.1-trav |(19317, 19607)|3.0|(1.000,1.000,1.000)|-1
-VSSEDKVVQSPLSLVVHEGDTVTLNCSYEVTN---FQSLLWYKQEK-KAPTFLFMLTSS
GIEK-KSGRLSSILDKKELFSILNITATQTGDSAIYLCAVE-----
>V114RF-AJFE01024276.1-trav |(73725, 74027)|3.0|(1.000,1.000,1.000)|-1
-FSMAQTVTQSQPEMSVQEAETVTLSCTYDTSE--SDYYLFWYKQPPSRQMILVIRQEAY
KQQNATENRFSVNFQKAAKSFSLKISDSQLGDAAMYFCAYRS----
>V115RF-AJFE01024276.1-trav |(95666, 95954)|2.99199600001|(0.997,0.997,0.998)|-1
-LSGELKVEQSPLFLSTQEGKNYTIYCNYST-T---SDRLYWYRQDPGKSLESLFVLLSN
GAVK-QEGQLMASLDTKARLSTLHITAAVHDLSATYFCAV------
>V116RF-ABGA01386446.1-trav |(520, 807)|3.0|(1.000,1.000,1.000)|1
--VNSQQGEEDPQALSIQEGENATMNCSYKT-S---INNLQWYRQNSGRGLVHLILIRSN
EREK-HSGRLRVTLDTSKKSSSLLITASRAADTASYFCATD-----
>V117RF-ABGA01386446.1-trav |(6159, 6450)|2.9828400105|(0.997,0.995,0.991)|1
-RTNGDPVTQTEGPVTLPERAALTLNCTYQSSY--S-AFLFWYVQYLNKEPELLLRS-SE
NQ-ETDSRGFQASHVKSDSSFHLEKPSVQLSDSAVYYCVLR-----
>V121RF-ABGA01387831.1-trav |(4904, 5207)|2.96370048487|(0.990,0.975,1.000)|1
-PGIAQKITQTLPAMFVQEKEAVTLDCTYDTSD--QSYGLFWYKQPSSGEMILLIYQGSY
DKQNATEGRYSLNFQKARKSANLVISASQLGDSAMYFCAMKE----
>V122RF-ABGA01387833.1-trav |(6325, 6619)|2.97412824764|(0.985,0.992,0.998)|1
-RTHGDSVTQMEGPVTLSEEAFLTINCTYTATG--Y-PSLFWYVQYPGEGLQLLLKATKA
DD-KGSNKGFEATYHKETTSFHLEKDSVRESDSGVYFCALS-----
>V123RF-ABGA01387833.1-trav |(37695, 37988)|2.99298000014|(0.998,0.999,0.996)|1
VWCQQKEVEQNPGPLSVPEGAIASLNCTYSNSA---FQYFMWYRQYSRKGPELLIYIYSS
GNKQ--DGRFTAQVDTSGKYMSLFIRDSQPSDSATYLCAMS-----
>V136RF-ABGA01083932.1-trav |(371, 664)|2.97226014987|(0.992,0.981,1.000)|-1
-VSRGESVRPHLSTLGVQEGDNSVINCAYSDSA---SDYFIWYKQESGKGPQFIIDIRSN
MDKR-QGQRVTVLLNKTVKHLSLQIAATQPGDSAVYFCAEN-----
>V137RF-ABGA01083934.1-trav |(495, 792)|2.98364403777|(0.999,0.991,0.994)|-1
-GTRAQSVTQLDSHVSVSEGALVLLRCNYSSSV--S-PYLFWYVQYPNQGLQLLLKYTSG
TTLVKGINGFEAEFKKSETSFHLTKPSAHVSDTAQYFCAVS-----
>V138RF-ABGA01083937.1-trav |(4214, 4504)|2.994|(0.998,0.998,0.998)|-1
--VNGENVEQHPSTLSVQEGDSSVIKCTYSDSA---SNYFPWYKQEVGKGPQFIIDIRSN
MGEK-KDQRITVILNKTAKHFSLHITETQPGDSAVYFCAAS-----
>V140RF-ABGA01083939.1-trav |(4457, 4751)|2.99899600001|(1.000,1.000,0.999)|-1
-GINGDSVVQTEGQVLLSEGDSLIVNCSYETTQ--Y-PSLFWYVQYPGEGPQLLLKAMKA
ND-KGRNKGFEATYRKETTSFHLEKDSVQESDSAVYFCALS-----
>V141RF-ABGA01083939.1-trav |(18067, 18360)|3.0|(1.000,1.000,1.000)|-1
-GSGKNQVEQSPQSLIILEGKNCTLQCNYTVSP---FSNLRWYKQDTGRGPVSLTIMTFS
ENTK-SNGRYTATLDADTKQSSLHITASQLSDSASYICVVS-----
>V142RF-ABGA01083939.1-trav |(34050, 34338)|2.98979201242|(1.000,0.994,0.996)|-1
VWSQQKEVEQDPGPFNVPEGATVAFNCTYSNSA---SQSFFWYRQDCRKEPKLLMSVYSS
GN-E--NGRFTAQLNRASQYISLLIRDSQLSDSATYLCAV------
>V143RF-ABGA01083939.1-trav |(39521, 39818)|2.96950008499|(0.995,0.985,0.990)|-1
-GTRAQSVTQLDSHVPVSEGTRVLLRCNYSSSY--S-PSLFWYVQHPNQGLQLLLKYLSG
PTLVKGINGFEAEFKKSETSFHLTKSSAHVSDAAEYFCAMS-----
>V144RF-ABGA01113129.1-trav |(4972, 5260)|2.97456408064|(0.994,0.984,0.997)|-1
--VKSQKIEQNSEALNIQEGKTATLTCNYTNYS---PTYLQWYRQDPGRGPVFLLLIREN
EKEK-RKERLKVSFDTTLKQSLFHITASQPADSATYFCAL------
>V145RF-ABGA01113130.1-trav |(6720, 7010)|2.98870803341|(1.000,0.997,0.992)|-1
-MSRGEDVEQT-LFLSVQEGDSSVINCTYTDSS---STYLYWYKQEPGAGLQLLTYIFSN
MDLK-QDQRLTVLLNKKDKHLSLRIADTQTGDSAIYFCAEH-----
>V146RF-ABGA01113133.1-trav |(15271, 15560)|2.95106440553|(0.990,0.975,0.987)|-1
-----QSVAQPEDEVTVAEGNPLTVKCTYSVSG--N-PYLFWYIQYPNEGLQFLLKYITG
DNLVKGSYGFEAEFNKSQTSFHLKKPSALVSDSALYFCAVRD----
>V218RF-ABGA01321068.1-trav |(6457, 6745)|3.0|(1.000,1.000,1.000)|-1
-LSGELKVGQNPLFLSTQEGKNYTIYCNYST-T---SDRLYWYRQDPGKSLESLFVLLSN
GAVK-QEGRLMASLDTKARLSTLHITAAVHDLSATYFCAV------
>V219RF-ABGA01321070.1-trav |(796, 1096)|2.99798400013|(1.000,1.000,0.998)|-1
-FSMAQTVTQSQPEMSVQEAETVTLSCTYDTSE--SDYYLFWYKQPPSRQMILVIRQEAY
KQQNATENRFSVNFQKAAKSFSLKISDSQLGDAAMYFCAYR-----
>V221RF-ABGA01321081.1-trav |(7033, 7323)|2.54632087064|(0.808,0.898,0.930)|-1
-VSSEDKVVQSPLSLVVHEGDTVTLSCNYEVAN---FRSLLWYKQEK-KAPTFLFMLTSS
GIEK-KSGKLSSILDKKELFSILNITATQTRDSAIYLCAVE-----
>V122RF-AQIA01064137.1-trav |(6322, 6619)|2.50756310144|(0.916,0.739,0.995)|1
-GLRAQLVTQPEDQVTVAEGNPLTVKCTYSVSG--N-PYLFWYVQCPNQGLQFLLKYITG
DNLVKGSYGFEAEFNKSQTSFHLKKPSALVSDSALYFCAVR-----
>V123RF-AQIA01064137.1-trav |(37156, 37446)|2.98788400513|(0.995,1.000,0.993)|1
-MSRGEDVEQS-LFLSVREGDISVINCTYTDSS---STYLYWYKQEPGAGLQLLTYILSN
TDLK-QDQRLTVLLNKKDKHLSLCIADTQTEDSAIYFCAES-----
>V125RF-AQIA01064138.1-trav |(6177, 6471)|2.99496000066|(0.999,1.000,0.996)|1
-GINGDSVVQTEGQVLLSEGDSLIVNCSYESTQ--Y-PSLFWYVQYPGEGLQLLLKAMKF
ND-KESNKGFEATYRKETTSFHLEKDSVQESDSAVYFCALS-----
>V126RF-AQIA01064138.1-trav |(19410, 19703)|3.0|(1.000,1.000,1.000)|1
-GSGKNQVEQSPQSLIILEGKNCTLQCNYTVSP---FSNLRWYKQDTGKGPISLTIMTFS
ENTK-SNGRYTATLDADTKQSSLHITAAQLSDSASYICVVS-----
>V127RF-AQIA01064144.1-trav |(2574, 2880)|2.99798400013|(1.000,1.000,0.998)|1
VWSQQKEVEQDPGPFSVPEGATVTFNCTYSNSA---SQSFFWYRQDSRKEPKLLMSVYSS
GN-E--DGRFTAQLNRASQYISLLIRDSQLSDSATYLCAVRTQCSP
>V128RF-AQIA01064144.1-trav |(8015, 8312)|2.9761803079|(0.998,0.984,0.995)|1
-GTRAQSVTQLDSQVSVSEGVPVLLRCNYSSSF--S-PYLFWYVQYPNQGLQLLLKYTSG
TTLVKGINGFEAEFKKSETSFHLTKASAHVSDAAEYFCAVN-----
>V129RF-AQIA01064146.1-trav |(4210, 4500)|2.99696400065|(1.000,1.000,0.997)|1
--VNGENVEQHPSTLSVQEGDSSVIKCTYSDSA---SNYFPWYKQELGKGPQFIIDIRSN
AHEK-KNQRITVLLNKTAKHFSLHITETQPGDSAVYFCAAS-----
>V130RF-AQIA01064146.1-trav |(26731, 27019)|2.99596800026|(1.000,0.998,0.998)|1
VWSQQ-KVEQNSGPLNVPEGAIASLNCTYSDSG---SQSFFWYRQYSGQSPELLMSTYSS
GDKE--DGRFTAQLDRASQYVSLLIRDSQLSDSATYLCAV------
>V131RF-AQIA01064146.1-trav |(33220, 33517)|2.7400528427|(0.996,0.935,0.878)|1
-GTRAQSVTQLDSQVSVSEGVPVLLRCNYSSSF--S-PNLFWYVQYPNQGLQLLLKYISG
TTLVKGINGFEAEFKKSETSFHLTKASAHVSDAAEYFCAVS-----
>V132RF-AQIA01064146.1-trav |(38786, 39083)|2.99080001921|(0.999,1.000,0.992)|1
-TARAQSVTQPDIHITVSEGASLELRCNYSYGA--T-PSLFWYVQSPGQGLQLLLKYFSG
DTVVQGIKGFEAEFKRSQYSFNLRKPSVHWSDAAEYFCAAG-----
>V133RF-AQIA01064146.1-trav |(52629, 52922)|2.96189637729|(1.000,0.998,0.968)|1
-VSRGESVGLHLPTVTVQEGDNSVINCTYSDSA---SDYFLWYKQESGKGPQSIMDIRSN
MAKR-QGQRLTVLLNKTMKHLSLQIAATEPGDSAVYFCAEN-----
>V134RF-AQIA01064146.1-trav |(58513, 58814)|2.95910798542|(1.000,0.999,0.965)|1
-SGIAQKITQTQPAMFVQEKEAVTLDCTYDTSD--QNYGLFWYKQPSSGEMIFLILQMSY
DKQNATEGRYSLNFQKARKSVNLVISASQVGDSATYFCAMR-----
>V135RF-AQIA01064146.1-trav |(76833, 77127)|2.99899600001|(1.000,1.000,0.999)|1
-RTRGDSVTQMEGPVTLSERAFLTINCTYTATG--Y-PSLFWYVQYPGEGPQLLLKAAKT
DE-KGSNKGFEATYRKETTSFHLKKDSVQESDSAVYFCALS-----
>V136RF-AQIA01064146.1-trav |(101455, 101748)|3.0|(1.000,1.000,1.000)|1
VWSQQKEVEQNPGPLSVPEGATASLNCTYSNSA---FQYFMWYRQYSRKGPQLLIYIYSS
GNKE--DGRFTAQVDKSSKYISLFIRDSQPSDSATYFCAMS-----
>V138RF-AQIA01064148.1-trav |(10272, 10559)|2.997|(0.999,0.999,0.999)|1
--VNSQQGEEDPQALSIQEGENATMNCSYKT-S---INNLQWYRQDSGRSLVQLVLIRSN
EREK-NSGRLRVTLDTSKKSSSLLITASRAADTASYFCATD-----
>V139RF-AQIA01064149.1-trav |(7521, 7812)|2.99399200002|(0.998,0.999,0.997)|1
-RTNGDSVTQTEGPVTLPERAALTLNCTYQTSY--S-AFIFWYVQYPNKEPELLLKS-SE
NQ-ETNSRGFQASHVKSDSSFHLEKPSVQLSDSAVYYCVLR-----
>V140RF-AQIA01064149.1-trav |(10740, 11043)|2.99298000014|(0.998,0.999,0.996)|1
-SSMAQKVTQAQTEISVVEKEDVTLDCVYETRD--TTYYLFWYKQPPSGELVFLVRQNSF
DEQNEINGRYYSNFQKSTSSFNLTITASQVVDSAVYFCALNE----
>V141RF-AQIA01064151.1-trav |(18011, 18298)|2.99498400013|(0.999,0.997,0.999)|1
-LSGEDQVTQSPEALSLQEGESSSLNCSYTVSG---LRGLFWYRQDPGKGPEFLFSLYSA
GEEK-EKERLKATLTKK--ESFLHITGPKPEDSATYLCAVQ-----
>V144RF-AQIA01064159.1-trav |(7752, 8051)|2.60042769937|(0.968,0.991,0.778)|1
--VNGQQIMQIPQYQHVQEGEDFTTYCNSST----TLNNIQWYKQRPGGHPVFLITLVKS
GEVK-KQKRLIFQFGEAKKNSSLHITATQTTDVGTYFCAGHSAPQ-
>V146RF-AQIA01064165.1-trav |(18360, 18659)|2.95395304822|(0.996,0.980,0.980)|1
--VNGQQIMQIPQYQHVQEGEDFTTYCNSST-T---LSNIQWYKQRPGGHPVFLIMLVKS
GEVK-KQKRLTFQSGEAKKNSSLHITATQTTDVGTYFCAGHSAPQ-
>V148RF-AQIA01064166.1-trav |(53434, 53721)|2.34427015267|(0.812,0.738,0.816)|1
--VRSQQPVQSPQAVILQEGEDAIINCNSSK----ALYSVLWYRQKHGEAPIFLMILLKG
GEQK-SHDKIVATFNEKKQQSSLYLMASQLSYSGTYFCGAE-----
>V150RF-AQIA01064166.1-trav |(99136, 99426)|2.36332002599|(0.899,0.690,0.942)|1
-VSSEDKVMQNPLSLVVHEGDTVTLNCSYEVVN---FRSLLWYKQEK-KAPIFLFTLTSS
GIEK-KSGRLSSILDKKDLFSILNITATQTRDSAVYLCAVE-----
>V152RF-AQIA01064166.1-trav |(145402, 145702)|2.99593600205|(1.000,0.996,1.000)|1
-SGMAQTVTQSQPEMSVQEAETVTLSCTYDTSD--SDYYLFWYKQPPSRQMILIIRQEAY
KQQNATENRFSVNFQKATKSFSLKISDSQLGDAAMYFCAYR-----
>V153RF-AQIA01064166.1-trav |(168980, 169268)|3.0|(1.000,1.000,1.000)|1
-LSGELKVGQNPLFLSTQEGKNYTIYCNYST-A---SDRLYWYRQDPGKSLESLFVLLSN
GAVK-QEGRLMASLDTKARLSSLHITAALQDLSATYFCAV------
