# Supplementary material for: Iterative Variable Gene Discovery from Whole Genome Sequencing with a Bootstrapped Multiresolution Algorithm
Source: Comput Math Methods Med. 2019 Feb 11;2019:3780245. doi: 10.1155/2019/3780245 (PMC6388353; doi:10.1155/2019/3780245)
Supplement: Supplementary Materials — supp_materialsV2.pdf: this is an updated document, which includes new figures requested by the reviewer. sequences_alignments.zip: these are genome sequence files that are relevant for reproducing some of the results. [file 3780245.f1.zip › 3780245.f1/sequences_alignments/trav_3.nwk]

(V211RF-AQIB01128644.1-trav:0.01010,V67RF-JYKQ01054942.1-trav:0.01006,((V123RF-ABGA01387833.1-trav:0.05244,((V87RF-AGCE01026529.1-trav:0.07044,((V93RF-AGCE01026531.1-trav:0.02462,((V142RF-ABGA01083939.1-trav:0.01026,((V70RF-AACZ03097613.1-trav:0.0,V60RF-AJFE01069975.1-trav:0.0):0.01041,(V66RF-ADFV01192037.1-trav:0.02096,V7RF-CABD02105584.1-trav:0.00055)0.000:0.00055)0.787:0.01040)0.788:0.01090,((V197RF-JABR01098603.1-trav:0.0,V127RF-AQIA01064144.1-trav:0.0):0.00054,(V83RF-AHZZ01198216.1-trav:0.00055,V59RF-JYKQ01054940.1-trav:0.00962)0.920:0.00939)0.861:0.02008)0.745:0.02921)0.998:0.13563,((((V51RF-ABDC01379531.1-trav:0.0,V91RF-ABDC01491653.1-trav:0.0):0.08568,(V52RF-JZKE01143895.1-trav:0.05138,(V56RF-JZKE01143896.1-trav:0.01860,V57RF-JZKE01143902.1-trav:0.01012)0.634:0.00053)0.900:0.01958)0.708:0.01221,(V54RF-ABDC01388284.1-trav:0.11663,((((((V193RF-JABR01098600.1-trav:0.00961,(V64RF-JYKQ01054942.1-trav:0.00965,(V133RF-AQIA01064146.1-trav:0.01946,(V58RF-AHZZ01107544.1-trav:0.0,V214RF-AQIB01128644.1-trav:0.0):0.00055)0.000:0.00055)0.866:0.02017)0.908:0.03811,(V72RF-ADFV01192038.1-trav:0.01946,(V136RF-ABGA01083932.1-trav:0.03958,(V11RF-CABD02105589.1-trav:0.00962,V65RF-AJFE01069976.1-trav:0.00055)0.925:0.01945)0.862:0.00055)0.806:0.02351)0.995:0.12164,(V74RF-ABDC01418428.1-trav:0.13863,((V50RF-JZKE01143895.1-trav:0.00055,V61RF-JZKE01143910.1-trav:0.02987)0.776:0.03126,(V80RF-ABDC01440241.1-trav:0.08368,V54RF-JZKE01143896.1-trav:0.14107)0.654:0.03460)0.260:0.02292)0.713:0.02398)0.872:0.03625,(V65RF-JZKE01143915.1-trav:0.12048,(V90RF-AGCE01026530.1-trav:0.11705,((((V196RF-JABR01098601.1-trav:0.01973,V61RF-JYKQ01054942.1-trav:0.00982)0.799:0.00989,V129RF-AQIA01064146.1-trav:0.00983)1.000:0.00054,V55RF-AHZZ01107544.1-trav:0.00966)0.870:0.01777,(V138RF-ABGA01083937.1-trav:0.01138,(V72RF-AACZ03097614.1-trav:0.00990,V62RF-AJFE01069975.1-trav:0.00055)0.985:0.06126)0.728:0.01621)0.856:0.02788)0.972:0.07378)0.355:0.02198)0.931:0.12983,((V95RF-AGCE01026534.1-trav:0.16128,(V3RF-CABD02105570.1-trav:0.01975,((V65RF-AACZ03097612.1-trav:0.00054,(((V199RF-JABR01098604.1-trav:0.00054,V207RF-AQIB01128644.1-trav:0.02006)0.838:0.00054,(V123RF-AQIA01064137.1-trav:0.01016,(V80RF-AHZZ01198213.1-trav:0.00055,V56RF-JYKQ01054933.1-trav:0.00990)0.958:0.03010)0.277:0.00993)0.908:0.03059,(V61RF-ADFV01192035.1-trav:0.02015,V145RF-ABGA01113130.1-trav:0.03060)0.000:0.00055)0.851:0.00988)0.000:0.00055,V54RF-AJFE01069975.1-trav:0.00986)0.874:0.01990)0.749:0.01258)0.970:0.13531,(V47RF-ABDC01377653.1-trav:0.11461,V70RF-JZKE01143916.1-trav:0.01796)0.706:0.09145)0.767:0.10720)0.973:0.26641,(((((V23RF-CABD02105615.1-trav:0.00055,V87RF-ADFV01192042.1-trav:0.00978)0.767:0.00820,((V88RF-AACZ03097624.1-trav:0.00055,V212RF-AACZ03179105.1-trav:0.00966)0.717:0.00055,V82RF-AGCE01026522.1-trav:0.06050)0.599:0.01126)0.752:0.00099,(V177RF-JABR01098595.1-trav:0.01381,V165RF-JYKQ01026655.1-trav:0.04821)0.250:0.01688)1.000:1.35767,((((V48RF-JZKE01143891.1-trav:0.08358,((((V71RF-JYKQ01054957.1-trav:0.00921,V140RF-AQIA01064149.1-trav:0.00914)0.764:0.00814,V35RF-AHZZ01098200.1-trav:0.04442)0.386:0.01404,V205RF-AQIB01128643.1-trav:0.01542)0.101:0.01908,V187RF-JABR01098598.1-trav:0.01088)0.974:0.10325)0.983:0.14049,(((((V65RF-JYKQ01054942.1-trav:0.00054,(V59RF-AHZZ01107545.1-trav:0.00943,V134RF-AQIA01064146.1-trav:0.00055)0.923:0.01903)0.926:0.01956,((V73RF-ADFV01192039.1-trav:0.03278,(V121RF-ABGA01387831.1-trav:0.02920,(V76RF-AACZ03097618.1-trav:0.00951,(V12RF-CABD02105589.1-trav:0.01963,(V201RF-AACZ03171512.1-trav:0.0,V66RF-AJFE01069976.1-trav:0.0):0.01989)1.000:0.00054)0.598:0.01953)0.705:0.00866)0.961:0.04632,V194RF-JABR01098600.1-trav:0.04507)0.462:0.00112)0.575:0.00203,V215RF-AQIB01128644.1-trav:0.00958)0.937:0.09363,(((V55RF-JZKE01143896.1-trav:0.05117,V51RF-JZKE01143895.1-trav:0.03787)0.093:0.00055,V50RF-ABDC01379531.1-trav:0.04742)0.054:0.02758,V62RF-JZKE01143910.1-trav:0.05718)0.036:0.03454)0.954:0.10647,(V33RF-JZKE01143868.1-trav:0.06068,((V172RF-JABR01098590.1-trav:0.00945,(V95RF-ADFV01192049.1-trav:0.01867,(V60RF-AACZ03095317.1-trav:0.00909,((V27RF-CABD02105626.1-trav:0.0,V219RF-ABGA01321070.1-trav:0.0):0.00055,V114RF-AJFE01024276.1-trav:0.00055)0.000:0.00055)0.792:0.00918)0.769:0.00892)0.769:0.00923,(V3RF-AHZZ01035404.1-trav:0.00055,(V152RF-AQIA01064166.1-trav:0.00054,(V120RF-JYKQ01135388.1-trav:0.00053,V196RF-AQIB01128637.1-trav:0.04750)0.128:0.01799)0.839:0.00910)0.770:0.00903)0.814:0.02826)1.000:0.20805)0.326:0.06371)0.520:0.06447,(V166RF-JYKQ01026663.1-trav:0.07407,(V210RF-AHZZ01093953.1-trav:0.00054,(V167RF-JYKQ01026665.1-trav:0.0,V204RF-JYKQ01066669.1-trav:0.0):0.00942)0.738:0.01590)0.977:0.18842)0.922:0.32681,((((V60RF-ADFV01192035.1-trav:0.02082,(V122RF-AQIA01064137.1-trav:0.01036,(V55RF-JYKQ01054925.1-trav:0.00055,V121RF-AHZZ01044061.1-trav:0.01035)0.000:0.00053)0.762:0.01032)0.402:0.01101,(V2RF-CABD02105568.1-trav:0.02034,V146RF-ABGA01113133.1-trav:0.03186)0.883:0.00055)0.974:0.20158,(V55RF-ABDC01388284.1-trav:0.13990,((V89RF-AGCE01026530.1-trav:0.00972,(V68RF-ADFV01192037.1-trav:0.02054,((V71RF-AACZ03097613.1-trav:0.0,V61RF-AJFE01069975.1-trav:0.0):0.01032,((V192RF-JABR01098600.1-trav:0.0,V213RF-AQIB01128644.1-trav:0.0):0.00055,V132RF-AQIA01064146.1-trav:0.01035)0.912:0.02084)0.768:0.01027)0.819:0.02270)1.000:0.25518,((V8RF-CABD02105586.1-trav:0.05151,(V67RF-ADFV01192037.1-trav:0.00053,V143RF-ABGA01083939.1-trav:0.06401)0.167:0.00988)0.939:0.03123,((V71RF-ADFV01192038.1-trav:0.03046,((V74RF-AACZ03097614.1-trav:0.0,V64RF-AJFE01069975.1-trav:0.0):0.05154,V137RF-ABGA01083934.1-trav:0.02000)0.293:0.00055)0.834:0.01001,(V60RF-JYKQ01054940.1-trav:0.02061,(V198RF-JABR01098603.1-trav:0.03034,(V84RF-AHZZ01198216.1-trav:0.00054,((V63RF-JYKQ01054942.1-trav:0.02008,(((V191RF-JABR01098600.1-trav:0.01996,V212RF-AQIB01128644.1-trav:0.02017)0.767:0.00986,V131RF-AQIA01064146.1-trav:0.00054)0.923:0.01996,V57RF-AHZZ01107544.1-trav:0.00055)0.781:0.00995)0.781:0.01017,V128RF-AQIA01064144.1-trav:0.00055)0.837:0.01008)0.774:0.00982)0.727:0.00995)0.891:0.02014)0.000:0.00054)0.961:0.09058)0.776:0.03541)0.956:0.13700)0.883:0.17835,((V46RF-JZKE01143890.1-trav:0.19631,(V85RF-AGCE01026527.1-trav:0.04288,(V101RF-ABDC01533415.1-trav:0.16698,(((V186RF-JABR01098598.1-trav:0.01548,((V34RF-AHZZ01098200.1-trav:0.02069,(V70RF-JYKQ01054957.1-trav:0.0,V139RF-AQIA01064149.1-trav:0.0):0.00055)0.000:0.00054,V204RF-AQIB01128643.1-trav:0.01007)0.907:0.02880)0.788:0.01682,V117RF-ABGA01386446.1-trav:0.02043)0.774:0.01350,V78RF-ADFV01192039.1-trav:0.02869)0.766:0.00987)0.756:0.00856)0.919:0.11685)0.955:0.20248,(V74RF-AGCE01026519.1-trav:0.53574,(((V128RF-ABDC01454736.1-trav:0.06621,V63RF-JZKE01143913.1-trav:0.10736)0.470:0.01010,(V58RF-JZKE01143903.1-trav:0.01747,(V74RF-ADFV01192039.1-trav:0.02057,(((V60RF-AHZZ01107545.1-trav:0.0,V66RF-JYKQ01054942.1-trav:0.0):0.00055,(V216RF-AQIB01128644.1-trav:0.00826,V135RF-AQIA01064146.1-trav:0.00416)0.926:0.00810)0.989:0.05336,(V122RF-ABGA01387833.1-trav:0.02102,(V13RF-CABD02105590.1-trav:0.00054,(V77RF-AACZ03097618.1-trav:0.0,V67RF-AJFE01069976.1-trav:0.0):0.00996)0.345:0.02060)0.751:0.02039)0.102:0.00054)0.990:0.07880)0.736:0.03245)0.497:0.01880,(V72RF-JZKE01143916.1-trav:0.13211,(V96RF-AGCE01026534.1-trav:0.13124,(((V68RF-AACZ03097613.1-trav:0.00055,V58RF-AJFE01069975.1-trav:0.00993)0.929:0.02000,(V140RF-ABGA01083939.1-trav:0.00055,(V64RF-ADFV01192035.1-trav:0.01000,V5RF-CABD02105579.1-trav:0.00055)0.847:0.00999)0.000:0.00055)0.861:0.01967,(V202RF-JABR01098604.1-trav:0.03999,((V209RF-AQIB01128644.1-trav:0.0,V57RF-JYKQ01054940.1-trav:0.0):0.01967,V125RF-AQIA01064138.1-trav:0.01998)0.637:0.00053)0.813:0.01025)0.707:0.01589)0.903:0.08895)0.832:0.08627)0.915:0.16046)0.411:0.09119)0.897:0.17697)0.991:0.63726)0.485:0.08318)0.876:0.35614,(((((V102RF-ABDC01542818.1-trav:0.07163,V34RF-JZKE01143869.1-trav:0.00938)0.880:0.06502,((V204RF-AHZZ01093946.1-trav:0.01025,(V162RF-JYKQ01026643.1-trav:0.01952,V150RF-AQIA01064166.1-trav:0.00055)0.877:0.01923)0.964:0.05138,(((V58RF-AACZ03095314.1-trav:0.0,V113RF-AJFE01024276.1-trav:0.0):0.00055,V200RF-AACZ03171149.1-trav:0.00980)0.787:0.01028,(V221RF-ABGA01321081.1-trav:0.03944,(V93RF-ADFV01192045.1-trav:0.02963,V175RF-JABR01098593.1-trav:0.05127)0.772:0.00985)0.776:0.00907)0.733:0.00875)0.926:0.08549)1.000:0.43876,((V201RF-JABR01098604.1-trav:0.01836,(V63RF-ADFV01192035.1-trav:0.03147,(V67RF-AACZ03097613.1-trav:0.00055,V56RF-AJFE01069975.1-trav:0.01036)0.752:0.01030)0.755:0.04629)1.000:0.41165,(V80RF-AGCE01026522.1-trav:0.02779,(V80RF-ADFV01192040.1-trav:0.03226,(V183RF-JABR01098597.1-trav:0.02134,(V43RF-JABR01080842.1-trav:0.02111,(V72RF-JYKQ01054957.1-trav:0.01794,(((V17RF-CABD02105602.1-trav:0.0,V72RF-AJFE01069977.1-trav:0.0):0.00054,V82RF-AACZ03097619.1-trav:0.01076)0.789:0.01737,(V36RF-AHZZ01098200.1-trav:0.01076,(V202RF-AQIB01128642.1-trav:0.0,V141RF-AQIA01064151.1-trav:0.0):0.00055)0.746:0.01575)0.391:0.02162)0.862:0.01464)0.958:0.00055)0.762:0.01076)0.861:0.03847)0.989:0.26233)0.649:0.03058)0.817:0.04925,((V86RF-AACZ03097622.1-trav:0.00054,(V21RF-CABD02105612.1-trav:0.00989,V86RF-AJFE01010527.1-trav:0.00993)0.842:0.00983)1.000:0.46696,(V4RF-AHZZ01035404.1-trav:0.00055,((V193RF-AQIB01128636.1-trav:0.02110,(V93RF-JABR01039937.1-trav:0.04237,(V96RF-ADFV01192050.1-trav:0.03227,(V28RF-CABD02105628.1-trav:0.02104,(V218RF-ABGA01321068.1-trav:0.00055,(V61RF-AACZ03095319.1-trav:0.00055,V115RF-AJFE01024276.1-trav:0.01045)0.925:0.02109)0.000:0.00054)0.647:0.00054)0.960:0.03203)0.000:0.00053)0.898:0.01044,(V121RF-JYKQ01135389.1-trav:0.0,V153RF-AQIA01064166.1-trav:0.0):0.00054)0.828:0.01026)1.000:0.49235)0.775:0.04940)0.806:0.08522,(((V59RF-JZKE01143910.1-trav:0.06701,((V69RF-AACZ03097613.1-trav:0.00055,(V6RF-CABD02105581.1-trav:0.00958,(V141RF-ABGA01083939.1-trav:0.00956,V59RF-AJFE01069975.1-trav:0.00953)0.000:0.00055)0.000:0.00054)0.382:0.00054,(V65RF-ADFV01192037.1-trav:0.01988,(V203RF-JABR01098604.1-trav:0.01779,(((V82RF-AHZZ01198214.1-trav:0.0,V126RF-AQIA01064138.1-trav:0.0):0.00055,V210RF-AQIB01128644.1-trav:0.02894)0.846:0.00956,V58RF-JYKQ01054940.1-trav:0.00959)0.691:0.00451)0.802:0.01623)0.786:0.00946)0.895:0.09124)1.000:0.36395,(((V100RF-ABDC01533414.1-trav:0.07511,V49RF-JZKE01143893.1-trav:0.01387)0.368:0.09259,(V84RF-AGCE01026527.1-trav:0.15135,((V185RF-JABR01098598.1-trav:0.02862,(V138RF-AQIA01064148.1-trav:0.00937,(V218RF-AQIB01128644.1-trav:0.01885,(V33RF-AHZZ01098200.1-trav:0.00946,V69RF-JYKQ01054953.1-trav:0.00055)0.000:0.00054)0.844:0.00941)0.928:0.00055)0.902:0.02015,(((V15RF-CABD02105596.1-trav:0.0,V116RF-ABGA01386446.1-trav:0.0):0.00055,(V80RF-AACZ03097619.1-trav:0.0,V70RF-AJFE01069976.1-trav:0.0):0.00956)0.773:0.00792,V77RF-ADFV01192039.1-trav:0.06901)0.745:0.01042)0.786:0.02988)0.747:0.05845)0.991:0.18730,((((V176RF-JABR01098595.1-trav:0.00617,V144RF-AQIA01064159.1-trav:0.01882)0.770:0.00398,(((V22RF-CABD02105614.1-trav:0.00964,(V87RF-AACZ03097624.1-trav:0.0,V202RF-AACZ03171676.1-trav:0.0):0.00055)0.914:0.01948,V146RF-AQIA01064165.1-trav:0.00974)0.796:0.00978,V205RF-AHZZ01093949.1-trav:0.00967)1.000:0.00054)0.997:0.45395,((V57RF-AACZ03095312.1-trav:0.01006,(V24RF-CABD02105616.1-trav:0.01018,V198RF-AACZ03171059.1-trav:0.02037)0.785:0.01058)0.906:0.06416,(V208RF-AHZZ01093949.1-trav:0.03073,V148RF-AQIA01064166.1-trav:0.02007)0.922:0.00055)0.997:0.50818)0.968:0.30364,(((V66RF-AACZ03097613.1-trav:0.0,V166RF-AACZ03171395.1-trav:0.0,V55RF-AJFE01069975.1-trav:0.0):0.02061,(V62RF-ADFV01192035.1-trav:0.01041,(V4RF-CABD02105575.1-trav:0.01039,V144RF-ABGA01113129.1-trav:0.03133)0.000:0.00054)0.912:0.00054)0.971:0.11052,(V48RF-ABDC01377655.1-trav:0.08785,V71RF-JZKE01143916.1-trav:0.02090)0.966:0.11338)0.986:0.21273)0.496:0.02938)0.899:0.14058)0.232:0.08286,(V81RF-AGCE01026522.1-trav:0.05900,(V184RF-JABR01098597.1-trav:0.01006,(V203RF-AQIB01128642.1-trav:0.02551,(V18RF-CABD02105602.1-trav:0.01352,V73RF-AJFE01069977.1-trav:0.00552)0.248:0.01896)0.788:0.01364)0.701:0.00875)1.000:0.45637)0.779:0.07268)0.959:0.20070)0.051:0.06760)0.993:0.36527)0.717:0.03225)0.985:0.09878,((V70RF-ADFV01192038.1-trav:0.03762,(V10RF-CABD02105588.1-trav:0.00054,(V73RF-AACZ03097614.1-trav:0.02033,V63RF-AJFE01069975.1-trav:0.00055)0.907:0.01018)0.683:0.00521)0.846:0.02551,(V62RF-JYKQ01054942.1-trav:0.00055,(V190RF-JABR01098600.1-trav:0.05262,((V56RF-AHZZ01107544.1-trav:0.01045,V130RF-AQIA01064146.1-trav:0.02076)0.507:0.01046,V91RF-AGCE01026530.1-trav:0.07462)0.362:0.00055)0.715:0.01029)0.941:0.04961)0.946:0.06190)0.719:0.02149)0.975:0.07603)0.879:0.03545,(V75RF-ADFV01192039.1-trav:0.03063,(V68RF-AJFE01069976.1-trav:0.02046,(V14RF-CABD02105592.1-trav:0.01014,V78RF-AACZ03097619.1-trav:0.01012)0.000:0.00053)0.775:0.01006)0.750:0.01035)0.715:0.00973)0.940:0.03090,((V217RF-AQIB01128644.1-trav:0.0,V136RF-AQIA01064146.1-trav:0.0):0.00055,(V31RF-AHZZ01098200.1-trav:0.02011,V188RF-JABR01098599.1-trav:0.02029)0.772:0.01015)0.000:0.00053)0.000:0.00055);
